# Supplementary material
Source: Research Square preprint supplement (doi:10.21203/rs.3.rs-9763213/v1)
Supplement: Supplementary file 1 [file 0f452a79d9df2dbdeffa583f.xlsx]

## Sheet: RNAseq_stats_Local
baseMean	log2FoldChange	lfcSE	stat	pvalue	padj	ID	dir	Significance
79.3612	3.19297	0.282503	11.3024	1.27687e-29	2.03035e-25	ENSG00000129474.16_AJUBA	up	YES
112.406	5.02592	0.464102	10.8293	2.49923e-27	1.98702e-23	ENSG00000062038.15_CDH3	up	YES
368.011	4.43617	0.417936	10.6145	2.55278e-26	1.35306e-22	ENSG00000103888.17_CEMIP	up	YES
144.786	4.06814	0.388137	10.4812	1.05379e-25	4.18909e-22	ENSG00000163347.6_CLDN1	up	YES
283.466	4.89622	0.470222	10.4126	2.17281e-25	6.90996e-22	ENSG00000164379.7_FOXQ1	up	YES
133.885	4.13457	0.403314	10.2515	1.16559e-24	3.08901e-21	ENSG00000105464.4_GRIN2D	up	YES
28.876	4.32166	0.427675	10.105	5.24874e-24	1.19229e-20	ENSG00000112559.15_MDFI	up	YES
43.0754	-4.94373	0.490755	-10.0737	7.21863e-24	1.43479e-20	ENSG00000131096.10_PYY	down	YES
544.944	-1.79958	0.179452	-10.0282	1.14587e-23	2.0245e-20	ENSG00000149218.5_ENDOD1	down	YES
208.774	3.22772	0.323519	9.97689	1.92407e-23	3.05946e-20	ENSG00000165816.13_VWA2	up	YES
27.1	6.2042	0.636796	9.74284	1.97941e-22	2.86133e-19	ENSG00000128422.17_KRT17	up	YES
175.826	2.65858	0.273514	9.72009	2.47569e-22	3.18216e-19	ENSG00000116017.11_ARID3A	up	YES
1038.07	3.34019	0.343817	9.71503	2.6016e-22	3.18216e-19	ENSG00000120708.17_TGFBI	up	YES
52.6692	3.60973	0.371922	9.7056	2.85404e-22	3.24158e-19	ENSG00000173894.11_CBX2	up	YES
1089.71	-2.05938	0.21266	-9.68389	3.53022e-22	3.74226e-19	ENSG00000117592.9_PRDX6	down	YES
101.278	2.1507	0.224874	9.56402	1.13273e-21	1.12572e-18	ENSG00000188483.8_IER5L	up	YES
63.8199	3.2438	0.340721	9.5204	1.72519e-21	1.61366e-18	ENSG00000099953.10_MMP11	up	YES
610.865	2.34499	0.248503	9.43648	3.85531e-21	3.40574e-18	ENSG00000068650.19_ATP11A	up	YES
361.307	-1.70223	0.182279	-9.33855	9.76656e-21	7.76992e-18	ENSG00000123643.13_SLC36A1	down	YES
258.918	2.53101	0.271031	9.33848	9.77287e-21	7.76992e-18	ENSG00000131389.18_SLC6A6	up	YES
125.371	2.48522	0.268713	9.24859	2.27465e-20	1.72234e-17	ENSG00000158555.15_GDPD5	up	YES
277.079	2.77344	0.303054	9.15162	5.60872e-20	4.05383e-17	ENSG00000173898.15_SPTBN2	up	YES
601.916	1.94474	0.212679	9.14401	6.01764e-20	4.16028e-17	ENSG00000136295.15_TTYH3	up	YES
130.163	1.63616	0.180119	9.08378	1.04869e-19	6.94798e-17	ENSG00000141582.15_CBX4	up	YES
27.8899	3.33852	0.368441	9.06121	1.29014e-19	8.20584e-17	ENSG00000122641.11_INHBA	up	YES
721.961	1.88672	0.208385	9.05404	1.3778e-19	8.42631e-17	ENSG00000026508.20_CD44	up	YES
135.638	2.51574	0.278772	9.02435	1.80768e-19	1.06459e-16	ENSG00000069011.16_PITX1	up	YES
165.164	-1.36239	0.151368	-9.00047	2.24752e-19	1.24644e-16	ENSG00000082146.13_STRADB	down	YES
122.721	2.12338	0.235952	8.99922	2.27324e-19	1.24644e-16	ENSG00000122778.10_KIAA1549	up	YES
43.8525	3.61244	0.405076	8.91793	4.75089e-19	2.51813e-16	ENSG00000231566.2_LINC02595	up	YES
40.4966	4.3971	0.494023	8.90061	5.55422e-19	2.84896e-16	ENSG00000181652.19_ATG9B	up	YES
91.9319	2.41439	0.272608	8.85661	8.24809e-19	4.05952e-16	ENSG00000029153.14_ARNTL2	up	YES
41.2591	2.99671	0.338449	8.85425	8.4249e-19	4.05952e-16	ENSG00000110881.12_ASIC1	up	YES
290.885	3.39388	0.38521	8.81047	1.24618e-18	5.82811e-16	ENSG00000168502.17_MTCL1	up	YES
87.6281	2.91025	0.331006	8.79215	1.4672e-18	6.66571e-16	ENSG00000169247.14_SH3TC2	up	YES
40.1064	3.37626	0.384329	8.78481	1.56623e-18	6.91797e-16	ENSG00000042832.12_TG	up	YES
364.368	4.62094	0.528713	8.73998	2.33143e-18	1.00195e-15	ENSG00000130600.19_H19	up	YES
139.225	3.50943	0.402837	8.7118	2.99085e-18	1.25151e-15	ENSG00000163739.5_CXCL1	up	YES
64.3145	3.30923	0.381965	8.66369	4.56723e-18	1.86214e-15	ENSG00000162849.16_KIF26B	up	YES
218.478	1.4284	0.165233	8.64476	5.39169e-18	2.14333e-15	ENSG00000176978.14_DPP7	up	YES
81.5882	3.35308	0.389202	8.61528	6.97737e-18	2.70603e-15	ENSG00000198535.5_C2CD4A	up	YES
37.4297	3.01382	0.350995	8.58652	8.96431e-18	3.39385e-15	ENSG00000187583.11_PLEKHN1	up	YES
94.2238	3.34491	0.390593	8.56368	1.0932e-17	4.04256e-15	ENSG00000163734.4_CXCL3	up	YES
599.299	-2.68155	0.315478	-8.49997	1.89644e-17	6.85347e-15	ENSG00000176641.11_RNF152	down	YES
166.533	2.00971	0.237104	8.47607	2.32928e-17	8.23063e-15	ENSG00000111110.12_PPM1H	up	YES
53.637	3.73875	0.441353	8.4711	2.43082e-17	8.4027e-15	ENSG00000088836.14_SLC4A11	up	YES
31.9969	3.55902	0.420569	8.46239	2.6196e-17	8.86261e-15	ENSG00000138028.16_CGREF1	up	YES
911.231	1.51853	0.179842	8.44372	3.07394e-17	1.01831e-14	ENSG00000110092.4_CCND1	up	YES
99.2169	3.05682	0.3626	8.43029	3.44803e-17	1.11892e-14	ENSG00000122861.16_PLAU	up	YES
48.7292	4.2697	0.509251	8.38427	5.10421e-17	1.62324e-14	ENSG00000281406.2_BLACAT1	up	YES
582.586	1.85899	0.224271	8.28904	1.14169e-16	3.55961e-14	ENSG00000101224.18_CDC25B	up	YES
146.647	3.39949	0.410688	8.27756	1.2572e-16	3.84438e-14	ENSG00000120875.9_DUSP4	up	YES
60.1783	4.35316	0.526515	8.26789	1.3635e-16	4.09076e-14	ENSG00000167767.14_KRT80	up	YES
94.2052	2.46571	0.298363	8.26413	1.40718e-16	4.14363e-14	ENSG00000146477.6_SLC22A3	up	YES
40.8532	2.16103	0.262061	8.24629	1.63383e-16	4.72355e-14	ENSG00000106089.12_STX1A	up	YES
14.9017	3.01637	0.36653	8.22955	1.87915e-16	5.33577e-14	ENSG00000157766.19_ACAN	up	YES
60.4465	3.22778	0.393181	8.20939	2.22315e-16	6.20181e-14	ENSG00000165905.18_LARGE2	up	YES
657.074	1.79104	0.218596	8.19337	2.54014e-16	6.96393e-14	ENSG00000171617.15_ENC1	up	YES
71.2348	5.38926	0.659975	8.16586	3.19148e-16	8.60131e-14	ENSG00000159263.16_SIM2	up	YES
345.315	1.89672	0.232577	8.15526	3.48429e-16	9.23396e-14	ENSG00000006704.11_GTF2IRD1	up	YES
312.53	-1.12844	0.138514	-8.14673	3.73908e-16	9.74675e-14	ENSG00000117682.17_DHDDS	down	YES
168.9	-3.50552	0.43114	-8.13082	4.2638e-16	1.09353e-13	ENSG00000269404.7_SPIB	down	YES
335.153	2.65246	0.326667	8.11977	4.67079e-16	1.17889e-13	ENSG00000183018.9_SPNS2	up	YES
88.9836	2.55025	0.315292	8.08852	6.03938e-16	1.5005e-13	ENSG00000140859.16_KIFC3	up	YES
73.3107	3.80582	0.47106	8.07928	6.51524e-16	1.59383e-13	ENSG00000145506.14_NKD2	up	YES
488.068	1.18276	0.146683	8.0634	7.42039e-16	1.78775e-13	ENSG00000157227.14_MMP14	up	YES
19.2125	-3.21538	0.402051	-7.99745	1.27026e-15	3.01468e-13	ENSG00000187783.12_TMEM72	down	YES
80.8574	1.34667	0.168732	7.98114	1.44983e-15	3.36033e-13	ENSG00000101189.7_MRGBP	up	YES
319.953	2.80707	0.351744	7.98044	1.45816e-15	3.36033e-13	ENSG00000131746.13_TNS4	up	YES
176.456	2.0994	0.263517	7.96685	1.62774e-15	3.69754e-13	ENSG00000088899.16_LZTS3	up	YES
926.172	-1.04011	0.13083	-7.95011	1.86339e-15	4.17321e-13	ENSG00000100412.17_ACO2	down	YES
695.709	1.1778	0.148682	7.92162	2.34429e-15	5.1773e-13	ENSG00000164889.15_SLC4A2	up	YES
87.5059	1.96723	0.248715	7.90959	2.58235e-15	5.62493e-13	ENSG00000006118.15_TMEM132A	up	YES
102.346	2.05531	0.260304	7.8958	2.88459e-15	6.19836e-13	ENSG00000134013.16_LOXL2	up	YES
85.993	2.67434	0.338818	7.89314	2.94674e-15	6.24749e-13	ENSG00000181634.8_TNFSF15	up	YES
341.603	2.31141	0.293873	7.86535	3.68066e-15	7.70081e-13	ENSG00000101187.16_SLCO4A1	up	YES
34.7664	3.54677	0.45107	7.86301	3.75002e-15	7.74404e-13	ENSG00000274979.1_RP11-1143G9.5	up	YES
88.9464	2.19289	0.279169	7.85508	3.99532e-15	8.14482e-13	ENSG00000089327.15_FXYD5	up	YES
46.6801	1.95732	0.249282	7.85184	4.09972e-15	8.25186e-13	ENSG00000141570.11_CBX8	up	YES
76.8132	2.72414	0.348023	7.82746	4.9781e-15	9.89459e-13	ENSG00000081041.9_CXCL2	up	YES
411.475	2.31706	0.29637	7.81813	5.36155e-15	1.05252e-12	ENSG00000184916.9_JAG2	up	YES
416.733	-0.745893	0.0959012	-7.77772	7.38418e-15	1.4319e-12	ENSG00000107185.10_RGP1	down	YES
1210.88	-1.80993	0.23287	-7.77229	7.70778e-15	1.47664e-12	ENSG00000136826.15_KLF4	down	YES
24.5739	-2.11196	0.272112	-7.76135	8.40284e-15	1.59064e-12	ENSG00000141837.22_CACNA1A	down	YES
130.064	1.0393	0.13405	7.7531	8.96736e-15	1.67753e-12	ENSG00000160767.21_FAM189B	up	YES
103.72	2.96644	0.382731	7.75072	9.13751e-15	1.68948e-12	ENSG00000273079.7_GRIN2B	up	YES
83.5592	1.81693	0.234548	7.74652	9.44458e-15	1.72619e-12	ENSG00000124602.10_UNC5CL	up	YES
26.1369	1.43336	0.185299	7.73539	1.0309e-14	1.86276e-12	ENSG00000065600.13_PACC1	up	YES
266.392	2.45104	0.318726	7.69013	1.46985e-14	2.62608e-12	ENSG00000249859.12_PVT1	up	YES
26.1296	2.4951	0.324873	7.68022	1.5882e-14	2.806e-12	ENSG00000249992.2_TMEM158	up	YES
63.2819	2.09118	0.272623	7.67061	1.71185e-14	2.99123e-12	ENSG00000198720.13_ANKRD13B	up	YES
704.543	-1.48115	0.193191	-7.66674	1.76421e-14	3.0492e-12	ENSG00000116704.8_SLC35D1	down	YES
1020.27	-1.90924	0.249261	-7.65959	1.86526e-14	3.18919e-12	ENSG00000169764.16_UGP2	down	YES
222.536	1.98506	0.259435	7.65147	1.987e-14	3.36121e-12	ENSG00000102265.12_TIMP1	up	YES
269.255	5.42553	0.711137	7.62937	2.35902e-14	3.94851e-12	ENSG00000165376.12_CLDN2	up	YES
18.4104	-2.33033	0.305701	-7.62288	2.4807e-14	4.10891e-12	ENSG00000144648.16_ACKR2	down	YES
47.1312	4.43314	0.581796	7.61975	2.54164e-14	4.16645e-12	ENSG00000101115.13_SALL4	up	YES
154.983	1.95488	0.25668	7.61603	2.616e-14	4.2446e-12	ENSG00000120254.16_MTHFD1L	up	YES
94.7941	1.97068	0.260086	7.57704	3.53534e-14	5.67832e-12	ENSG00000118707.11_TGIF2	up	YES
5047.56	2.5147	0.33207	7.57282	3.65217e-14	5.80731e-12	ENSG00000108821.14_COL1A1	up	YES
25.0978	1.8906	0.250045	7.56104	3.99865e-14	6.29531e-12	ENSG00000100228.14_RAB36	up	YES
85.554	4.69545	0.621991	7.54907	4.38382e-14	6.83403e-12	ENSG00000196611.6_MMP1	up	YES
887.854	2.05209	0.272087	7.54203	4.62717e-14	7.14336e-12	ENSG00000167880.8_EVPL	up	YES
579.403	2.09371	0.277793	7.53695	4.81102e-14	7.35578e-12	ENSG00000136997.21_MYC	up	YES
184.701	1.96166	0.260584	7.52795	5.1542e-14	7.80542e-12	ENSG00000109501.15_WFS1	up	YES
577.76	1.24888	0.16603	7.52204	5.39292e-14	8.08989e-12	ENSG00000196411.10_EPHB4	up	YES
42.61	3.05001	0.405879	7.51458	5.70937e-14	8.48455e-12	ENSG00000165912.16_PACSIN3	up	YES
571.538	1.91685	0.255166	7.51217	5.81553e-14	8.54908e-12	ENSG00000105976.16_MET	up	YES
132.924	1.50864	0.200853	7.51117	5.86032e-14	8.54908e-12	ENSG00000143126.8_CELSR2	up	YES
342.695	0.93348	0.124401	7.50383	6.19811e-14	8.95965e-12	ENSG00000064666.15_CNN2	up	YES
144.193	1.08064	0.14413	7.4977	6.49496e-14	9.30417e-12	ENSG00000103148.17_NPRL3	up	YES
843.023	1.8861	0.251912	7.48716	7.03817e-14	9.99231e-12	ENSG00000125398.8_SOX9	up	YES
1099.49	-1.81141	0.241995	-7.48532	7.13755e-14	1.00437e-11	ENSG00000042445.14_RETSAT	down	YES
196.02	0.754319	0.100799	7.4834	7.24216e-14	1.01015e-11	ENSG00000165733.8_BMS1	up	YES
361.581	1.63488	0.21899	7.46558	8.29338e-14	1.12712e-11	ENSG00000123989.14_CHPF	up	YES
353.509	-1.57925	0.211475	-7.46779	8.15522e-14	1.12712e-11	ENSG00000139433.11_GLTP	down	YES
418.937	1.73201	0.231974	7.46641	8.24099e-14	1.12712e-11	ENSG00000183742.13_MACC1	up	YES
149.345	2.48168	0.332759	7.45789	8.79174e-14	1.18472e-11	ENSG00000157193.18_LRP8	up	YES
27.3622	2.37584	0.318665	7.45562	8.94481e-14	1.19522e-11	ENSG00000151388.11_ADAMTS12	up	YES
1312.54	-3.97358	0.533642	-7.44615	9.61038e-14	1.27345e-11	ENSG00000133742.14_CA1	down	YES
402.663	-2.1701	0.291564	-7.44296	9.84559e-14	1.29384e-11	ENSG00000187699.10_C2orf88	down	YES
41.7592	2.19245	0.294643	7.44101	9.99169e-14	1.30228e-11	ENSG00000128578.10_STRIP2	up	YES
860.265	0.96099	0.129322	7.43098	1.07793e-13	1.39351e-11	ENSG00000164916.11_FOXK1	up	YES
2065.26	-2.04915	0.275938	-7.42614	1.11809e-13	1.43376e-11	ENSG00000144063.4_MALL	down	YES
245.433	-1.04777	0.141461	-7.40681	1.29375e-13	1.64575e-11	ENSG00000162144.10_CYB561A3	down	YES
114.048	1.14298	0.154406	7.40243	1.33718e-13	1.66114e-11	ENSG00000114019.15_AMOTL2	up	YES
397.126	2.44381	0.330085	7.40358	1.32558e-13	1.66114e-11	ENSG00000139289.14_PHLDA1	up	YES
34.6208	3.06525	0.414033	7.40342	1.32725e-13	1.66114e-11	ENSG00000253368.4_TRNP1	up	YES
142.206	2.10315	0.284245	7.39908	1.37129e-13	1.6773e-11	ENSG00000163013.12_FBXO41	up	YES
121.356	1.28736	0.173985	7.39929	1.36915e-13	1.6773e-11	ENSG00000204054.14_LINC00963	up	YES
17.8249	-2.54314	0.344271	-7.38702	1.50159e-13	1.82266e-11	ENSG00000102010.15_BMX	down	YES
44.2225	-3.13126	0.423968	-7.38561	1.51753e-13	1.82805e-11	ENSG00000109182.12_CWH43	down	YES
215.623	0.983808	0.133255	7.38291	1.54864e-13	1.8515e-11	ENSG00000160803.8_UBQLN4	up	YES
1329.64	-1.98733	0.269487	-7.3745	1.64961e-13	1.95749e-11	ENSG00000181061.14_HIGD1A	down	YES
17.4411	2.14056	0.290371	7.37181	1.68323e-13	1.98259e-11	ENSG00000078900.15_TP73	up	YES
17.9307	-2.0493	0.278082	-7.36942	1.71378e-13	2.00374e-11	ENSG00000144821.10_MYH15	down	YES
53.7787	2.39502	0.325706	7.35333	1.93326e-13	2.24385e-11	ENSG00000088826.18_SMOX	up	YES
116.021	3.30103	0.44945	7.3446	2.06379e-13	2.37799e-11	ENSG00000175832.13_ETV4	up	YES
92.6203	-1.9762	0.269405	-7.33543	2.21014e-13	2.5283e-11	ENSG00000178031.18_ADAMTSL1	down	YES
137.004	1.99642	0.272604	7.32351	2.4157e-13	2.74371e-11	ENSG00000112759.19_SLC29A1	up	YES
26.8942	2.81193	0.384244	7.31808	2.51537e-13	2.83665e-11	ENSG00000183914.14_DNAH2	up	YES
923.447	-1.38734	0.189756	-7.31116	2.64853e-13	2.94897e-11	ENSG00000158158.12_CNNM4	down	YES
190.676	2.05421	0.280976	7.31098	2.65205e-13	2.94897e-11	ENSG00000196739.15_COL27A1	up	YES
25.0093	1.84418	0.252396	7.30672	2.73752e-13	3.02286e-11	ENSG00000175711.8_B3GNTL1	up	YES
587.7	1.36126	0.186429	7.30177	2.84009e-13	3.11451e-11	ENSG00000124766.7_SOX4	up	YES
44.0209	3.01101	0.412557	7.2984	2.91211e-13	3.17161e-11	ENSG00000273604.2_EPOP	up	YES
302.8	1.65465	0.226771	7.29657	2.95201e-13	3.19319e-11	ENSG00000089351.15_GRAMD1A	up	YES
226.032	1.24642	0.170858	7.29508	2.98478e-13	3.20683e-11	ENSG00000120256.11_LRP11	up	YES
18.4189	2.36895	0.325237	7.28376	3.24636e-13	3.46446e-11	ENSG00000143333.7_RGS16	up	YES
503.334	1.48146	0.203538	7.27851	3.37534e-13	3.57808e-11	ENSG00000167291.16_TBC1D16	up	YES
157.675	2.23444	0.307204	7.27348	3.50331e-13	3.68915e-11	ENSG00000107719.9_PALD1	up	YES
1344.87	2.06572	0.284739	7.25476	4.02375e-13	4.20932e-11	ENSG00000130702.15_LAMA5	up	YES
50.2897	4.58564	0.632415	7.25099	4.13733e-13	4.29985e-11	ENSG00000129451.12_KLK10	up	YES
148.527	1.03396	0.143286	7.21606	5.35165e-13	5.49968e-11	ENSG00000106683.15_LIMK1	up	YES
76.0631	3.10798	0.430717	7.21582	5.36099e-13	5.49968e-11	ENSG00000181577.16_C6orf223	up	YES
45.1136	3.36029	0.467169	7.19287	6.34415e-13	6.46656e-11	ENSG00000160183.17_TMPRSS3	up	YES
1454.34	-1.01589	0.141321	-7.18851	6.55014e-13	6.6249e-11	ENSG00000163251.4_FZD5	down	YES
18.8705	1.80104	0.250569	7.18783	6.58282e-13	6.6249e-11	ENSG00000182118.8_FAM89A	up	YES
137.036	1.53785	0.214187	7.17991	6.97553e-13	6.97596e-11	ENSG00000177410.13_ZFAS1	up	YES
169.861	1.29572	0.180508	7.17821	7.06318e-13	7.01948e-11	ENSG00000157350.13_ST3GAL2	up	YES
309.897	0.870577	0.121358	7.1736	7.30529e-13	7.215e-11	ENSG00000204371.11_EHMT2	up	YES
542.833	0.911435	0.12716	7.16764	7.63034e-13	7.4895e-11	ENSG00000130309.11_COLGALT1	up	YES
488.874	-1.29536	0.181164	-7.15017	8.66733e-13	8.40361e-11	ENSG00000162437.14_RAVER2	down	YES
150.43	4.01149	0.561013	7.15043	8.65065e-13	8.40361e-11	ENSG00000178773.15_CPNE7	up	YES
366.167	-1.74659	0.244312	-7.14902	8.73991e-13	8.42263e-11	ENSG00000158201.10_ABHD3	down	YES
447.894	-1.23987	0.173562	-7.14368	9.08641e-13	8.70379e-11	ENSG00000120162.10_MOB3B	down	YES
1248.14	-2.82878	0.396399	-7.1362	9.59465e-13	9.1356e-11	ENSG00000080493.18_SLC4A4	down	YES
315.915	-2.39783	0.336074	-7.13482	9.69144e-13	9.17283e-11	ENSG00000140323.6_DISP2	down	YES
582.408	2.1613	0.303142	7.12967	1.00613e-12	9.46656e-11	ENSG00000187498.16_COL4A1	up	YES
463.557	-1.61182	0.226185	-7.1261	1.0325e-12	9.60107e-11	ENSG00000119950.21_MXI1	down	YES
289.45	-2.20758	0.309767	-7.12658	1.02895e-12	9.60107e-11	ENSG00000172594.13_SMPDL3A	down	YES
27.6922	2.25058	0.316806	7.10396	1.21228e-12	1.12073e-10	ENSG00000131188.12_PRR7	up	YES
15.6643	3.14782	0.443202	7.10245	1.22566e-12	1.12654e-10	ENSG00000279806.1_RP11-58O9.2	up	YES
376.642	-1.18556	0.167197	-7.09076	1.33374e-12	1.21884e-10	ENSG00000143061.18_IGSF3	down	YES
301.698	1.86386	0.263088	7.08455	1.39493e-12	1.26747e-10	ENSG00000127418.15_FGFRL1	up	YES
266.471	-3.59321	0.507745	-7.0768	1.47525e-12	1.33283e-10	ENSG00000118777.12_ABCG2	down	YES
719.394	-1.02535	0.145101	-7.06648	1.58912e-12	1.42761e-10	ENSG00000100266.19_PACSIN2	down	YES
1489.73	-2.25458	0.319268	-7.06172	1.64452e-12	1.46907e-10	ENSG00000134531.10_EMP1	down	YES
13.3705	2.60352	0.368755	7.06031	1.66137e-12	1.47583e-10	ENSG00000104415.14_CCN4	up	YES
64.0702	-3.14547	0.44567	-7.05785	1.69098e-12	1.49379e-10	ENSG00000163815.6_CLEC3B	down	YES
871.641	-1.7455	0.247525	-7.05182	1.76596e-12	1.55141e-10	ENSG00000076641.4_PAG1	down	YES
49.7876	-2.06995	0.293585	-7.05062	1.78124e-12	1.55624e-10	ENSG00000170703.16_TTLL6	down	YES
87.1884	2.46371	0.349961	7.03994	1.92317e-12	1.67106e-10	ENSG00000160862.13_AZGP1	up	YES
644.654	-1.02206	0.145351	-7.03169	2.04051e-12	1.75435e-10	ENSG00000100014.20_SPECC1L	down	YES
44.9817	1.73443	0.246661	7.03165	2.04109e-12	1.75435e-10	ENSG00000120327.7_PCDHB14	up	YES
89.5109	1.16378	0.165617	7.02694	2.11117e-12	1.80482e-10	ENSG00000186416.17_NKRF	up	YES
60.6288	2.28948	0.325971	7.02355	2.16297e-12	1.83742e-10	ENSG00000103253.19_HAGHL	up	YES
462.405	1.33218	0.18969	7.02294	2.17241e-12	1.83742e-10	ENSG00000214078.13_CPNE1	up	YES
321.421	1.55779	0.221905	7.02008	2.21744e-12	1.86558e-10	ENSG00000126001.16_CEP250	up	YES
10.3713	2.75591	0.39277	7.0166	2.27337e-12	1.90257e-10	ENSG00000124216.4_SNAI1	up	YES
28.255	-2.52095	0.360144	-6.99983	2.56266e-12	2.13177e-10	ENSG00000129167.10_TPH1	down	YES
306.545	-1.46685	0.209573	-6.99921	2.57405e-12	2.13177e-10	ENSG00000163249.13_CCNYL1	down	YES
820.656	-1.7656	0.252302	-6.99795	2.59735e-12	2.13992e-10	ENSG00000151623.15_NR3C2	down	YES
117.84	0.979496	0.140343	6.97928	2.96703e-12	2.4319e-10	ENSG00000184675.11_AMER1	up	YES
330.417	-2.48817	0.356881	-6.97198	3.12511e-12	2.54833e-10	ENSG00000197766.8_CFD	down	YES
113.13	0.906999	0.130127	6.97012	3.16668e-12	2.55601e-10	ENSG00000102119.12_EMD	up	YES
582.624	1.2729	0.182608	6.97068	3.15421e-12	2.55601e-10	ENSG00000114554.12_PLXNA1	up	YES
268.503	1.74826	0.250981	6.9657	3.26773e-12	2.62425e-10	ENSG00000153395.10_LPCAT1	up	YES
272.856	-1.52248	0.218605	-6.96453	3.29509e-12	2.63292e-10	ENSG00000181751.10_MACIR	down	YES
145.107	2.8943	0.416003	6.95742	3.46572e-12	2.75542e-10	ENSG00000137699.17_TRIM29	up	YES
51.7399	1.12775	0.162383	6.94496	3.78577e-12	2.95132e-10	ENSG00000010539.12_ZNF200	up	YES
165.178	1.5646	0.225309	6.94424	3.80492e-12	2.95132e-10	ENSG00000112877.8_CEP72	up	YES
202.783	2.52205	0.36316	6.94473	3.79198e-12	2.95132e-10	ENSG00000166278.15_C2	up	YES
25.192	3.47388	0.500133	6.94592	3.76001e-12	2.95132e-10	ENSG00000179546.5_HTR1D	up	YES
415.68	2.01963	0.290768	6.94585	3.76197e-12	2.95132e-10	ENSG00000198959.12_TGM2	up	YES
75.9957	1.48842	0.214441	6.94093	3.89514e-12	3.00663e-10	ENSG00000232956.9_SNHG15	up	YES
37.9403	2.31072	0.33304	6.93827	3.9694e-12	3.04915e-10	ENSG00000062282.15_DGAT2	up	YES
111.609	-1.82478	0.263314	-6.93006	4.20662e-12	3.21584e-10	ENSG00000177181.15_RIMKLA	down	YES
470.757	-1.34316	0.193871	-6.9281	4.26516e-12	3.24499e-10	ENSG00000152642.11_GPD1L	down	YES
1004.26	-1.32147	0.191051	-6.91686	4.61749e-12	3.49632e-10	ENSG00000117620.15_SLC35A3	down	YES
28.8043	3.19968	0.462983	6.91101	4.8123e-12	3.62656e-10	ENSG00000287156.1_RP11-242G5.1	up	YES
589.538	-1.09289	0.158379	-6.90043	5.18462e-12	3.88871e-10	ENSG00000115977.21_AAK1	down	YES
274.976	1.84847	0.267941	6.8988	5.24445e-12	3.90111e-10	ENSG00000078114.19_NEBL	up	YES
36.0179	2.8494	0.413063	6.89823	5.26544e-12	3.90111e-10	ENSG00000151136.15_BTBD11	up	YES
238.567	1.24476	0.180469	6.89734	5.29858e-12	3.90111e-10	ENSG00000157827.20_FMNL2	up	YES
931.061	-2.52049	0.36543	-6.89732	5.29929e-12	3.90111e-10	ENSG00000160408.16_ST6GALNAC6	down	YES
20.338	1.4027	0.203667	6.88722	5.68915e-12	4.16881e-10	ENSG00000189046.11_ALKBH2	up	YES
174.709	2.97852	0.432538	6.88616	5.73174e-12	4.18075e-10	ENSG00000151012.13_SLC7A11	up	YES
143.853	1.2339	0.179449	6.87606	6.1532e-12	4.46767e-10	ENSG00000234420.7_ZNF37BP	up	YES
194.1	2.62727	0.382397	6.87052	6.39687e-12	4.62348e-10	ENSG00000243509.6_TNFRSF6B	up	YES
28.2546	2.40209	0.349745	6.86811	6.50591e-12	4.68102e-10	ENSG00000174672.16_BRSK2	up	YES
16.8472	2.07192	0.301931	6.86223	6.7796e-12	4.85596e-10	ENSG00000141519.15_CCDC40	up	YES
255.954	-1.77018	0.25819	-6.85611	7.07593e-12	5.04549e-10	ENSG00000187091.14_PLCD1	down	YES
634.42	0.629956	0.0919059	6.85436	7.16341e-12	5.08506e-10	ENSG00000171681.13_ATF7IP	up	YES
26.0985	-2.15131	0.314016	-6.85095	7.3361e-12	5.1845e-10	ENSG00000105784.15_RUNDC3B	down	YES
38.9629	1.13847	0.166254	6.84777	7.50107e-12	5.27763e-10	ENSG00000204366.4_ZBTB12	up	YES
1033.89	-1.88041	0.274728	-6.84462	7.66808e-12	5.37137e-10	ENSG00000187097.13_ENTPD5	down	YES
21.8653	-3.09943	0.453443	-6.83532	8.18215e-12	5.70633e-10	ENSG00000152292.17_SH2D6	down	YES
762.852	-1.05314	0.15412	-6.83326	8.30065e-12	5.7637e-10	ENSG00000106299.8_WASL	down	YES
277.916	0.727896	0.106668	6.82397	8.8557e-12	6.12237e-10	ENSG00000106443.17_PHF14	up	YES
331.147	0.9995	0.146569	6.8193	9.14836e-12	6.24369e-10	ENSG00000080845.19_DLGAP4	up	YES
49.8571	2.19004	0.321182	6.81868	9.18825e-12	6.24369e-10	ENSG00000142235.13_LMTK3	up	YES
25.9549	1.8331	0.268823	6.81898	9.1687e-12	6.24369e-10	ENSG00000196793.14_ZNF239	up	YES
17.0807	-2.78825	0.40884	-6.8199	9.11056e-12	6.24369e-10	ENSG00000256674.1_RP11-172C16.4	down	YES
90.7251	1.15719	0.169795	6.81523	9.41106e-12	6.36789e-10	ENSG00000139266.6_MARCHF9	up	YES
53.4536	-1.60633	0.235773	-6.81303	9.5565e-12	6.4389e-10	ENSG00000176472.10_ZNF575	down	YES
50.686	1.29606	0.190418	6.80641	1.00067e-11	6.7138e-10	ENSG00000106125.14_MINDY4	up	YES
534.255	2.15138	0.316151	6.80491	1.01111e-11	6.72801e-10	ENSG00000124225.16_PMEPA1	up	YES
83.7632	0.97172	0.142797	6.80489	1.01125e-11	6.72801e-10	ENSG00000136891.14_TEX10	up	YES
27.3472	2.75372	0.40537	6.79311	1.09744e-11	7.27098e-10	ENSG00000232803.1_SLCO4A1-AS1	up	YES
762.737	-1.82011	0.268024	-6.79085	1.11476e-11	7.35513e-10	ENSG00000105755.8_ETHE1	down	YES
140.06	1.5376	0.226609	6.78524	1.15891e-11	7.61477e-10	ENSG00000128342.5_LIF	up	YES
61.2195	1.70859	0.252037	6.7791	1.20928e-11	7.91305e-10	ENSG00000277496.1_RP11-93B14.9	up	YES
2329.68	-2.06613	0.305774	-6.75707	1.40808e-11	9.17617e-10	ENSG00000158467.16_AHCYL2	down	YES
29.6217	1.98355	0.293583	6.75635	1.41507e-11	9.18412e-10	ENSG00000179241.13_LDLRAD3	up	YES
314.536	-0.987789	0.146301	-6.75176	1.46066e-11	9.44144e-10	ENSG00000158109.15_TPRG1L	down	YES
772.715	0.785758	0.116412	6.74978	1.48066e-11	9.53197e-10	ENSG00000101126.18_ADNP	up	YES
135.234	0.918062	0.13614	6.74352	1.5459e-11	9.7934e-10	ENSG00000107937.19_GTPBP4	up	YES
438.639	-0.925588	0.137234	-6.74458	1.53472e-11	9.7934e-10	ENSG00000119541.10_VPS4B	down	YES
511.855	3.87125	0.574058	6.74366	1.54447e-11	9.7934e-10	ENSG00000140807.7_NKD1	up	YES
226.587	1.47035	0.218034	6.74369	1.54411e-11	9.7934e-10	ENSG00000177426.22_TGIF1	up	YES
890.427	-1.06513	0.158253	-6.73055	1.69028e-11	1.06554e-09	ENSG00000120063.10_GNA13	down	YES
325.589	0.728391	0.108229	6.73011	1.69538e-11	1.06554e-09	ENSG00000171467.16_ZNF318	up	YES
1364.53	-0.984591	0.146327	-6.72869	1.71194e-11	1.07172e-09	ENSG00000070214.16_SLC44A1	down	YES
779.755	-1.34302	0.199701	-6.72513	1.75431e-11	1.09393e-09	ENSG00000138600.10_SPPL2A	down	YES
854.613	-1.58167	0.235255	-6.7232	1.77779e-11	1.10424e-09	ENSG00000069849.11_ATP1B3	down	YES
58.8367	1.25819	0.187196	6.72122	1.80214e-11	1.11501e-09	ENSG00000168005.9_SPINDOC	up	YES
171.673	1.01845	0.15154	6.72062	1.80948e-11	1.11521e-09	ENSG00000100105.18_PATZ1	up	YES
631.738	2.76163	0.411156	6.71676	1.85807e-11	1.132e-09	ENSG00000114270.18_COL7A1	up	YES
26.0526	2.92052	0.434799	6.71693	1.85589e-11	1.132e-09	ENSG00000174951.12_FUT1	up	YES
1371.98	0.736531	0.109641	6.71765	1.84683e-11	1.132e-09	ENSG00000288701.1_PRRC2B	up	YES
187.082	1.23263	0.183566	6.71488	1.88217e-11	1.1423e-09	ENSG00000161091.14_MFSD12	up	YES
58.5663	2.96894	0.442289	6.71266	1.91102e-11	1.15541e-09	ENSG00000088992.18_TESC	up	YES
15.49	2.12074	0.316014	6.71092	1.93401e-11	1.16487e-09	ENSG00000231881.2_RP5-1120P11.3	up	YES
347.039	2.22617	0.332082	6.70367	2.03243e-11	1.21953e-09	ENSG00000103257.9_SLC7A5	up	YES
29.3199	1.98113	0.295645	6.70103	2.0695e-11	1.23711e-09	ENSG00000114656.12_CFAP92	up	YES
123.975	-4.26052	0.636295	-6.69583	2.1445e-11	1.27714e-09	ENSG00000156284.6_CLDN8	down	YES
463.934	-1.03263	0.154248	-6.69459	2.16272e-11	1.28318e-09	ENSG00000204370.13_SDHD	down	YES
118.351	-2.54182	0.379885	-6.69101	2.21635e-11	1.31012e-09	ENSG00000162949.16_CAPN13	down	YES
123.07	3.53673	0.528749	6.68887	2.24897e-11	1.31474e-09	ENSG00000073067.14_CYP2W1	up	YES
1288.34	-2.07349	0.309947	-6.68982	2.2345e-11	1.31474e-09	ENSG00000074410.14_CA12	down	YES
22.9235	-2.62607	0.392579	-6.68927	2.24286e-11	1.31474e-09	ENSG00000166819.12_PLIN1	down	YES
372.6	1.14679	0.171533	6.68553	2.30092e-11	1.34018e-09	ENSG00000142207.7_URB1	up	YES
72.4103	1.38689	0.207507	6.68355	2.33228e-11	1.34857e-09	ENSG00000067177.15_PHKA1	up	YES
105.282	1.97826	0.295987	6.6836	2.33136e-11	1.34857e-09	ENSG00000125378.16_BMP4	up	YES
476.005	-1.28116	0.191755	-6.68125	2.3692e-11	1.36495e-09	ENSG00000137269.15_LRRC1	down	YES
796.168	-1.54083	0.230737	-6.67786	2.42457e-11	1.39181e-09	ENSG00000111802.14_TDP2	down	YES
38.7443	1.72153	0.257821	6.67723	2.43507e-11	1.39281e-09	ENSG00000197905.10_TEAD4	up	YES
937.421	-1.85591	0.278044	-6.67487	2.47459e-11	1.40994e-09	ENSG00000155545.20_MIER3	down	YES
151.268	-1.41607	0.212165	-6.67438	2.48276e-11	1.40994e-09	ENSG00000178537.10_SLC25A20	down	YES
697.534	-0.532865	0.0799406	-6.66575	2.63308e-11	1.48999e-09	ENSG00000022840.17_RNF10	down	YES
260.689	-1.17462	0.176262	-6.66405	2.66383e-11	1.50204e-09	ENSG00000130734.10_ATG4D	down	YES
32.447	1.99053	0.298861	6.66039	2.73106e-11	1.53451e-09	ENSG00000164542.13_KIAA0895	up	YES
17.6332	2.31414	0.347608	6.65734	2.78835e-11	1.56118e-09	ENSG00000174939.11_ASPHD1	up	YES
54.4869	2.12291	0.318928	6.65639	2.80643e-11	1.56579e-09	ENSG00000184497.13_TMEM255B	up	YES
48.3764	1.28973	0.193781	6.65561	2.82134e-11	1.5686e-09	ENSG00000077348.9_EXOSC5	up	YES
140.459	-0.913185	0.13723	-6.6544	2.84463e-11	1.57604e-09	ENSG00000099992.16_TBC1D10A	down	YES
70.4341	1.98017	0.297703	6.65148	2.90165e-11	1.60205e-09	ENSG00000228526.7_MIR34AHG	up	YES
271.069	1.45254	0.218403	6.65072	2.91659e-11	1.60473e-09	ENSG00000050344.9_NFE2L3	up	YES
229.521	1.95928	0.294627	6.65002	2.93046e-11	1.6068e-09	ENSG00000008300.17_CELSR3	up	YES
23.7146	-2.95626	0.444663	-6.64832	2.96453e-11	1.6199e-09	ENSG00000152580.9_IGSF10	down	YES
619.048	-1.44785	0.217833	-6.64658	2.99988e-11	1.6336e-09	ENSG00000165806.21_CASP7	down	YES
184.93	1.11885	0.168379	6.64481	3.03605e-11	1.64765e-09	ENSG00000165138.18_ANKS6	up	YES
50.5064	-2.44178	0.367666	-6.6413	3.10937e-11	1.6817e-09	ENSG00000138669.10_PRKG2	down	YES
360.348	-1.37831	0.207629	-6.63833	3.17267e-11	1.70434e-09	ENSG00000148842.18_CNNM2	down	YES
1078.19	-1.31294	0.19778	-6.63837	3.17168e-11	1.70434e-09	ENSG00000161714.12_PLCD3	down	YES
72.4849	1.25577	0.18931	6.6334	3.28038e-11	1.75627e-09	ENSG00000218891.5_ZNF579	up	YES
142.596	2.3956	0.361184	6.63264	3.29726e-11	1.75939e-09	ENSG00000090339.9_ICAM1	up	YES
110.475	0.989148	0.149231	6.62829	3.39594e-11	1.80598e-09	ENSG00000230124.8_ACBD6	up	YES
319.755	3.03887	0.458735	6.62445	3.48537e-11	1.84123e-09	ENSG00000183734.5_ASCL2	up	YES
17.4572	-2.1419	0.323332	-6.62446	3.48523e-11	1.84123e-09	ENSG00000253549.6_CA3-AS1	down	YES
668.842	-1.38235	0.208732	-6.62258	3.5298e-11	1.85852e-09	ENSG00000136044.12_APPL2	down	YES
194.472	1.36341	0.20591	6.62139	3.55844e-11	1.86742e-09	ENSG00000106348.18_IMPDH1	up	YES
267.458	2.2296	0.336879	6.6184	3.63103e-11	1.89925e-09	ENSG00000160932.11_LY6E	up	YES
734.675	-1.46392	0.221248	-6.61664	3.67449e-11	1.91568e-09	ENSG00000095203.15_EPB41L4B	down	YES
111.293	2.96925	0.449142	6.61094	3.81889e-11	1.98445e-09	ENSG00000206075.14_SERPINB5	up	YES
248.686	-3.63121	0.550885	-6.5916	4.35114e-11	2.25366e-09	ENSG00000168748.14_CA7	down	YES
523.786	-1.08894	0.165272	-6.58876	4.43506e-11	2.28967e-09	ENSG00000073417.15_PDE8A	down	YES
180.562	0.959011	0.145682	6.58292	4.61294e-11	2.3738e-09	ENSG00000135912.11_TTLL4	up	YES
214.381	2.0843	0.316753	6.5802	4.69813e-11	2.40984e-09	ENSG00000280109.3_PLAC4	up	YES
770.797	-0.824474	0.125451	-6.57211	4.96084e-11	2.53641e-09	ENSG00000075568.17_TMEM131	down	YES
651.975	-1.85299	0.282125	-6.56796	5.10096e-11	2.59969e-09	ENSG00000057704.13_TMCC3	down	YES
53.5816	1.16008	0.176731	6.56408	5.23537e-11	2.65967e-09	ENSG00000090447.12_TFAP4	up	YES
1091.72	-0.977696	0.149009	-6.56132	5.33321e-11	2.68528e-09	ENSG00000010256.11_UQCRC1	down	YES
182.441	1.15019	0.175295	6.56148	5.32765e-11	2.68528e-09	ENSG00000103855.18_CD276	up	YES
187.546	1.31787	0.200857	6.56123	5.33645e-11	2.68528e-09	ENSG00000140263.15_SORD	up	YES
325.219	-0.886311	0.135167	-6.55717	5.48387e-11	2.75076e-09	ENSG00000076513.17_ANKRD13A	down	YES
38.2848	1.08009	0.164802	6.55386	5.60691e-11	2.80363e-09	ENSG00000184792.16_OSBP2	up	YES
307.741	-2.32188	0.354349	-6.55254	5.6567e-11	2.81832e-09	ENSG00000166816.15_LDHD	down	YES
450.853	1.356	0.206955	6.55214	5.67174e-11	2.81832e-09	ENSG00000258366.10_RTEL1	up	YES
727.703	-1.25675	0.191897	-6.54905	5.79036e-11	2.8683e-09	ENSG00000071073.13_MGAT4A	down	YES
232.706	-1.12409	0.171691	-6.54713	5.86536e-11	2.89349e-09	ENSG00000160746.13_ANO10	down	YES
59.317	-1.69175	0.258407	-6.54682	5.8776e-11	2.89349e-09	ENSG00000176273.15_SLC35G1	down	YES
94.1018	1.69264	0.258608	6.5452	5.94147e-11	2.91591e-09	ENSG00000133131.15_MORC4	up	YES
242.28	0.835814	0.127733	6.54343	6.01245e-11	2.94166e-09	ENSG00000175931.13_UBE2O	up	YES
31.0458	1.22042	0.186576	6.54113	6.10548e-11	2.97801e-09	ENSG00000066697.15_MSANTD3	up	YES
114.723	-2.02666	0.310011	-6.53739	6.26021e-11	3.04415e-09	ENSG00000138678.11_GPAT3	down	YES
329.681	0.637563	0.0976088	6.53182	6.49765e-11	3.14998e-09	ENSG00000071564.17_TCF3	up	YES
124.977	-1.14855	0.17606	-6.52361	6.86368e-11	3.31731e-09	ENSG00000165359.16_INTS6L	down	YES
192.773	1.67605	0.257462	6.50991	7.51938e-11	3.6232e-09	ENSG00000139629.16_GALNT6	up	YES
892.211	-1.1886	0.182598	-6.50941	7.54478e-11	3.62446e-09	ENSG00000144426.19_NBEAL1	down	YES
3420.85	-1.2065	0.185418	-6.50694	7.66952e-11	3.67279e-09	ENSG00000172270.22_BSG	down	YES
281.61	1.59334	0.244884	6.50651	7.69158e-11	3.67279e-09	ENSG00000179403.12_VWA1	up	YES
69.5929	1.32193	0.203197	6.50567	7.73501e-11	3.68247e-09	ENSG00000107815.10_TWNK	up	YES
194.007	-1.01842	0.156577	-6.50423	7.8093e-11	3.70674e-09	ENSG00000078124.13_ACER3	down	YES
250.586	-1.40065	0.21536	-6.50377	7.83329e-11	3.70706e-09	ENSG00000171503.13_ETFDH	down	YES
26.4635	3.36673	0.517806	6.50192	7.93016e-11	3.74177e-09	ENSG00000113739.11_STC2	up	YES
196.739	-0.981355	0.150976	-6.50006	8.02894e-11	3.77716e-09	ENSG00000158006.14_PAFAH2	down	YES
173.356	2.18709	0.336585	6.49787	8.14625e-11	3.82105e-09	ENSG00000104728.16_ARHGEF10	up	YES
596.656	1.02382	0.157677	6.49317	8.40482e-11	3.93074e-09	ENSG00000103222.20_ABCC1	up	YES
514.407	-0.955065	0.147105	-6.4924	8.44769e-11	3.9392e-09	ENSG00000052795.13_FNIP2	down	YES
184.363	3.13245	0.48271	6.48931	8.62283e-11	4.00911e-09	ENSG00000102854.16_MSLN	up	YES
22.8759	1.76843	0.27256	6.48821	8.68641e-11	4.0269e-09	ENSG00000179598.6_PLD6	up	YES
385.315	-1.9745	0.304474	-6.48496	8.87558e-11	4.10263e-09	ENSG00000278535.5_DHRS11	down	YES
275.146	0.896689	0.138333	6.4821	9.04553e-11	4.16907e-09	ENSG00000044090.12_CUL7	up	YES
500.642	1.21013	0.186738	6.48037	9.1497e-11	4.20489e-09	ENSG00000084774.14_CAD	up	YES
38.3838	1.18071	0.182235	6.47905	9.23003e-11	4.22959e-09	ENSG00000108479.13_GALK1	up	YES
30.0271	2.13448	0.329519	6.47757	9.32136e-11	4.25917e-09	ENSG00000167207.14_NOD2	up	YES
634.575	-2.37125	0.366214	-6.47505	9.47836e-11	4.31849e-09	ENSG00000114455.13_HHLA2	down	YES
142.68	0.92422	0.142815	6.47147	9.70552e-11	4.40935e-09	ENSG00000215012.9_RTL10	up	YES
55.6279	1.85176	0.286251	6.46899	9.86603e-11	4.46951e-09	ENSG00000109089.7_CDR2L	up	YES
189.745	-1.08073	0.167167	-6.465	1.01298e-10	4.57596e-09	ENSG00000175348.11_TMEM9B	down	YES
575.472	0.610495	0.0944537	6.46343	1.02356e-10	4.61066e-09	ENSG00000089280.19_FUS	up	YES
36.2959	1.69977	0.263009	6.46278	1.02797e-10	4.61743e-09	ENSG00000146426.19_TIAM2	up	YES
152.873	-1.19404	0.184887	-6.45822	1.05945e-10	4.74544e-09	ENSG00000167130.18_DOLPP1	down	YES
244.962	1.27123	0.196977	6.45372	1.09137e-10	4.87469e-09	ENSG00000052749.14_RRP12	up	YES
257.5	0.995495	0.154387	6.44805	1.13297e-10	5.04631e-09	ENSG00000124571.18_XPO5	up	YES
42.4068	0.737591	0.114403	6.44729	1.1387e-10	5.04704e-09	ENSG00000162910.19_MRPL55	up	YES
423.683	-0.968215	0.150176	-6.44718	1.13948e-10	5.04704e-09	ENSG00000176340.4_COX8A	down	YES
188.862	0.789611	0.122585	6.44134	1.18422e-10	5.23064e-09	ENSG00000147130.14_ZMYM3	up	YES
90.3953	1.66969	0.259351	6.43795	1.21097e-10	5.33397e-09	ENSG00000174938.15_SEZ6L2	up	YES
124.831	-0.598697	0.0930543	-6.43384	1.24416e-10	5.46502e-09	ENSG00000140153.18_WDR20	down	YES
73.1108	-1.40057	0.217814	-6.4301	1.27516e-10	5.58578e-09	ENSG00000272686.1_WASL-DT	down	YES
149.074	-0.871857	0.135743	-6.42286	1.33741e-10	5.84234e-09	ENSG00000204564.12_C6orf136	down	YES
32.2285	1.12094	0.174611	6.41965	1.36592e-10	5.95055e-09	ENSG00000133627.18_ACTR3B	up	YES
758.72	-1.08811	0.169624	-6.41481	1.40997e-10	6.12567e-09	ENSG00000090020.11_SLC9A1	down	YES
134.837	1.87405	0.292183	6.41397	1.41778e-10	6.1428e-09	ENSG00000101104.13_PABPC1L	up	YES
93.3018	1.42639	0.222582	6.40839	1.47067e-10	6.35463e-09	ENSG00000091127.14_PUS7	up	YES
208.623	-2.7151	0.423745	-6.40738	1.48042e-10	6.37946e-09	ENSG00000165449.12_SLC16A9	down	YES
1410.73	-1.66395	0.259798	-6.40475	1.50612e-10	6.47263e-09	ENSG00000169116.11_PARM1	down	YES
166.567	-1.21258	0.18949	-6.3992	1.56198e-10	6.69462e-09	ENSG00000171100.15_MTM1	down	YES
50.0814	3.52295	0.550861	6.39536	1.6017e-10	6.8464e-09	ENSG00000139515.6_PDX1	up	YES
168.61	1.75807	0.274938	6.39442	1.61157e-10	6.87013e-09	ENSG00000158352.17_SHROOM4	up	YES
104.615	1.52875	0.23917	6.39187	1.63868e-10	6.96702e-09	ENSG00000184428.13_TOP1MT	up	YES
32.6752	-1.33511	0.208954	-6.38952	1.66409e-10	7.05621e-09	ENSG00000264575.1_LINC00526	down	YES
850.956	-1.04516	0.163632	-6.38724	1.68912e-10	7.14326e-09	ENSG00000164976.9_MYORG	down	YES
47.9588	3.2007	0.501151	6.3867	1.69504e-10	7.14928e-09	ENSG00000119535.18_CSF3R	up	YES
62.4486	-1.12277	0.175814	-6.38613	1.70141e-10	7.15717e-09	ENSG00000070759.17_TESK2	down	YES
385.394	-0.993686	0.155683	-6.38276	1.73926e-10	7.29709e-09	ENSG00000162104.10_ADCY9	down	YES
314.113	-1.32423	0.207489	-6.38217	1.74594e-10	7.30586e-09	ENSG00000243646.10_IL10RB	down	YES
129.088	1.56428	0.245198	6.37966	1.77479e-10	7.40708e-09	ENSG00000101412.13_E2F1	up	YES
289.313	-0.856985	0.134354	-6.37855	1.78776e-10	7.44167e-09	ENSG00000120053.12_GOT1	down	YES
641.028	0.693751	0.108832	6.3745	1.8356e-10	7.62087e-09	ENSG00000090621.15_PABPC4	up	YES
178.411	1.05532	0.165582	6.37341	1.84875e-10	7.65545e-09	ENSG00000187678.10_SPRY4	up	YES
245.437	1.0161	0.159449	6.37254	1.85923e-10	7.67885e-09	ENSG00000136141.15_LRCH1	up	YES
203.052	1.64247	0.257804	6.37101	1.87789e-10	7.73583e-09	ENSG00000196155.13_PLEKHG4	up	YES
17.5986	-2.7606	0.433555	-6.36735	1.92324e-10	7.9022e-09	ENSG00000183476.13_SH2D7	down	YES
53.7355	0.964483	0.151516	6.36556	1.94574e-10	7.95353e-09	ENSG00000132330.18_SCLY	up	YES
29.283	1.80384	0.283361	6.36589	1.94159e-10	7.95353e-09	ENSG00000149633.12_KIAA1755	up	YES
37.1454	1.13448	0.178297	6.36284	1.98055e-10	8.07507e-09	ENSG00000124588.22_NQO2	up	YES
69.5062	1.18821	0.18676	6.36224	1.98831e-10	8.08594e-09	ENSG00000165724.6_ZMYND19	up	YES
121.756	0.67765	0.10653	6.36113	2.00271e-10	8.12375e-09	ENSG00000198455.5_ZXDB	up	YES
222.917	0.919911	0.144637	6.36015	2.01561e-10	8.15526e-09	ENSG00000130559.19_CAMSAP1	up	YES
1241.98	2.03479	0.320086	6.357	2.05725e-10	8.30263e-09	ENSG00000108375.13_RNF43	up	YES
10.385	2.3916	0.376338	6.35492	2.08531e-10	8.39458e-09	ENSG00000107807.13_TLX1	up	YES
2344.47	-1.6983	0.26736	-6.35213	2.12355e-10	8.52692e-09	ENSG00000172831.14_CES2	down	YES
19.3351	2.76674	0.43568	6.3504	2.14755e-10	8.60156e-09	ENSG00000175592.9_FOSL1	up	YES
2055.44	-1.78669	0.281465	-6.34781	2.184e-10	8.72555e-09	ENSG00000089356.19_FXYD3	down	YES
30.0675	-2.60638	0.410759	-6.34528	2.22019e-10	8.84795e-09	ENSG00000164199.18_ADGRV1	down	YES
173.43	-1.26069	0.198997	-6.33522	2.37006e-10	9.42157e-09	ENSG00000137936.18_BCAR3	down	YES
328.706	0.965316	0.152564	6.32727	2.49534e-10	9.89487e-09	ENSG00000197961.12_ZNF121	up	YES
1107.15	-1.54539	0.244357	-6.32432	2.54356e-10	1.0061e-08	ENSG00000138193.16_PLCE1	down	YES
298.715	-0.69898	0.110555	-6.32244	2.57458e-10	1.01584e-08	ENSG00000087111.21_PIGS	down	YES
59.0653	-1.71859	0.271847	-6.32189	2.58391e-10	1.017e-08	ENSG00000135437.10_RDH5	down	YES
328.203	-1.55622	0.24627	-6.31915	2.63003e-10	1.03237e-08	ENSG00000181826.10_RELL1	down	YES
32.1126	2.85415	0.451692	6.3188	2.63594e-10	1.03237e-08	ENSG00000280055.2_TMEM75	up	YES
183.527	1.31659	0.208562	6.31268	2.74248e-10	1.07145e-08	ENSG00000085117.12_CD82	up	YES
564.386	-1.15404	0.182891	-6.31002	2.79006e-10	1.08737e-08	ENSG00000070961.16_ATP2B1	down	YES
519.368	1.64199	0.260286	6.30839	2.81947e-10	1.09615e-08	ENSG00000196352.16_CD55	up	YES
364.467	1.54479	0.244967	6.3061	2.86153e-10	1.10979e-08	ENSG00000164171.11_ITGA2	up	YES
363.161	-1.86109	0.295554	-6.29693	3.03598e-10	1.17458e-08	ENSG00000135678.12_CPM	down	YES
205.183	0.96699	0.153657	6.29319	3.10998e-10	1.1988e-08	ENSG00000122547.11_EEPD1	up	YES
463.902	-0.881541	0.140083	-6.29301	3.11368e-10	1.1988e-08	ENSG00000171475.14_WIPF2	down	YES
8.67963	1.90683	0.303369	6.28553	3.26744e-10	1.25496e-08	ENSG00000171224.9_FAM241B	up	YES
156.727	0.61682	0.0981435	6.28488	3.28109e-10	1.25717e-08	ENSG00000159267.17_HLCS	up	YES
990.688	-1.84141	0.293021	-6.28424	3.29469e-10	1.25878e-08	ENSG00000075142.14_SRI	down	YES
748.319	-0.994847	0.158316	-6.28393	3.30111e-10	1.25878e-08	ENSG00000102882.12_MAPK3	down	YES
149.717	-1.55284	0.247398	-6.27669	3.45862e-10	1.31568e-08	ENSG00000079335.20_CDC14A	down	YES
18.6487	1.93304	0.308302	6.26997	3.61108e-10	1.3704e-08	ENSG00000224430.2_MKRN5P	up	YES
273.514	2.20565	0.351876	6.26827	3.65074e-10	1.38215e-08	ENSG00000135074.16_ADAM19	up	YES
178.333	-2.59751	0.414547	-6.26592	3.70638e-10	1.39989e-08	ENSG00000100604.13_CHGA	down	YES
260.221	-0.939208	0.149901	-6.26553	3.71566e-10	1.40007e-08	ENSG00000093167.18_LRRFIP2	down	YES
341.457	1.95462	0.311988	6.26506	3.7269e-10	1.40098e-08	ENSG00000082512.15_TRAF5	up	YES
385.612	-2.19907	0.351147	-6.26254	3.78764e-10	1.42045e-08	ENSG00000006747.15_SCIN	down	YES
120.584	0.897997	0.14342	6.26131	3.81769e-10	1.42835e-08	ENSG00000001497.18_LAS1L	up	YES
1220.93	-1.02531	0.163823	-6.25862	3.88404e-10	1.44977e-08	ENSG00000120137.7_PANK3	down	YES
637.669	-0.955352	0.152675	-6.25741	3.91424e-10	1.45762e-08	ENSG00000154518.10_ATP5MC3	down	YES
310.938	-0.700578	0.112026	-6.25372	4.00787e-10	1.489e-08	ENSG00000196850.6_PPTC7	down	YES
83.4423	1.55821	0.249278	6.25088	4.08137e-10	1.51277e-08	ENSG00000175602.4_CCDC85B	up	YES
69.669	2.41009	0.385883	6.24565	4.22042e-10	1.56067e-08	ENSG00000182472.9_CAPN12	up	YES
26.3748	2.11449	0.33866	6.2437	4.27352e-10	1.57664e-08	ENSG00000183386.10_FHL3	up	YES
308.96	-1.77368	0.284376	-6.23708	4.4582e-10	1.64097e-08	ENSG00000196502.12_SULT1A1	down	YES
77.1958	0.929872	0.149146	6.23465	4.52782e-10	1.66275e-08	ENSG00000083093.10_PALB2	up	YES
2787.28	-1.26044	0.202433	-6.22644	4.7714e-10	1.74816e-08	ENSG00000074755.15_ZZEF1	down	YES
281.692	-1.63982	0.26342	-6.22511	4.81203e-10	1.75899e-08	ENSG00000082397.18_EPB41L3	down	YES
51.2115	2.06945	0.3327	6.22016	4.96645e-10	1.81127e-08	ENSG00000265148.6_TSPOAP1-AS1	up	YES
1038.41	-1.16761	0.187727	-6.21972	4.98055e-10	1.81226e-08	ENSG00000137501.17_SYTL2	down	YES
100.52	4.47113	0.719222	6.21662	5.07973e-10	1.84413e-08	ENSG00000118785.15_SPP1	up	YES
116.401	1.32368	0.213034	6.21344	5.18383e-10	1.87763e-08	ENSG00000177732.9_SOX12	up	YES
425.67	-0.713784	0.114934	-6.21039	5.2854e-10	1.91007e-08	ENSG00000141385.11_AFG3L2	down	YES
54.9853	1.50187	0.241859	6.20967	5.30961e-10	1.91447e-08	ENSG00000143067.5_ZNF697	up	YES
366.058	-1.13295	0.182487	-6.20841	5.35224e-10	1.92548e-08	ENSG00000198160.15_MIER1	down	YES
66.9823	2.04875	0.330145	6.2056	5.44878e-10	1.95578e-08	ENSG00000174307.7_PHLDA3	up	YES
180.765	0.930929	0.150172	6.19909	5.67897e-10	2.03381e-08	ENSG00000072864.16_NDE1	up	YES
40.4848	-1.75975	0.283892	-6.19867	5.69436e-10	2.03474e-08	ENSG00000203739.4_PRDX6-AS1	down	YES
255.532	1.15303	0.186044	6.19761	5.73272e-10	2.04386e-08	ENSG00000101361.17_NOP56	up	YES
107.874	1.51116	0.243849	6.19711	5.75096e-10	2.04577e-08	ENSG00000168268.11_NT5DC2	up	YES
147.501	0.716046	0.115593	6.19453	5.84591e-10	2.07491e-08	ENSG00000047230.15_CTPS2	up	YES
468.624	-0.722171	0.116614	-6.19283	5.90936e-10	2.09276e-08	ENSG00000182197.13_EXT1	down	YES
758.714	-2.15244	0.347617	-6.19199	5.94111e-10	2.09932e-08	ENSG00000164120.14_HPGD	down	YES
981.144	-1.70681	0.275817	-6.18819	6.0859e-10	2.14572e-08	ENSG00000109814.12_UGDH	down	YES
440.272	-1.89702	0.306598	-6.18733	6.11904e-10	2.15263e-08	ENSG00000138744.16_NAAA	down	YES
222.027	-2.95107	0.47721	-6.18401	6.24937e-10	2.19363e-08	ENSG00000196660.11_SLC30A10	down	YES
129.929	0.908832	0.147032	6.18118	6.36229e-10	2.22834e-08	ENSG00000086712.13_TXLNG	up	YES
50.1238	1.11339	0.180187	6.17907	6.44793e-10	2.25337e-08	ENSG00000112578.10_BYSL	up	YES
573.645	-0.740963	0.119927	-6.17844	6.47368e-10	2.25741e-08	ENSG00000180530.11_NRIP1	down	YES
1248.53	2.34345	0.379341	6.17768	6.50509e-10	2.2634e-08	ENSG00000090382.7_LYZ	up	YES
36.9857	1.27418	0.206275	6.17708	6.52988e-10	2.26706e-08	ENSG00000138101.19_DTNB	up	YES
57.2461	1.68859	0.273406	6.17614	6.56897e-10	2.27567e-08	ENSG00000261373.1_VPS9D1-AS1	up	YES
544.5	-1.94565	0.315113	-6.17447	6.63847e-10	2.29474e-08	ENSG00000172572.7_PDE3A	down	YES
894.657	-1.8488	0.299469	-6.1736	6.6751e-10	2.3024e-08	ENSG00000078804.13_TP53INP2	down	YES
267.107	0.841904	0.136382	6.17311	6.69578e-10	2.30454e-08	ENSG00000133422.14_MORC2	up	YES
24.8237	3.31372	0.536837	6.17266	6.71502e-10	2.30617e-08	ENSG00000154928.19_EPHB1	up	YES
644.297	0.71601	0.116037	6.17051	6.80699e-10	2.33272e-08	ENSG00000124795.17_DEK	up	YES
92.55	0.931487	0.150969	6.17006	6.82629e-10	2.3343e-08	ENSG00000188707.6_ZBED6CL	up	YES
309.173	1.66757	0.270302	6.16929	6.8599e-10	2.34076e-08	ENSG00000163191.6_S100A11	up	YES
116.217	-0.986293	0.159923	-6.16729	6.94701e-10	2.3654e-08	ENSG00000144040.13_SFXN5	down	YES
265.104	0.644532	0.104554	6.16458	7.06699e-10	2.40112e-08	ENSG00000130382.9_MLLT1	up	YES
291.42	-1.4607	0.236964	-6.16422	7.08319e-10	2.40149e-08	ENSG00000197375.13_SLC22A5	down	YES
19.0387	1.88875	0.306811	6.15606	7.4579e-10	2.52315e-08	ENSG00000184949.18_FAM227A	up	YES
38.7962	0.962332	0.156368	6.15427	7.54221e-10	2.54626e-08	ENSG00000156469.9_MTERF3	up	YES
1092.56	-1.19219	0.193864	-6.14962	7.76682e-10	2.61653e-08	ENSG00000172380.6_GNG12	down	YES
76.6234	-2.27519	0.37061	-6.13905	8.30185e-10	2.79086e-08	ENSG00000162461.8_SLC25A34	down	YES
20.4163	-1.72381	0.280885	-6.13705	8.40669e-10	2.82014e-08	ENSG00000287458.1_RP3-340B19.7	down	YES
281.801	-0.644314	0.105016	-6.13539	8.49483e-10	2.84371e-08	ENSG00000137275.16_RIPK1	down	YES
495.702	-0.997451	0.162697	-6.13072	8.74842e-10	2.92245e-08	ENSG00000159720.12_ATP6V0D1	down	YES
135.972	1.02647	0.16747	6.12928	8.8275e-10	2.93653e-08	ENSG00000126226.22_PCID2	up	YES
33.8916	3.22469	0.526102	6.1294	8.82128e-10	2.93653e-08	ENSG00000171004.18_HS6ST2	up	YES
362.173	-0.847049	0.138226	-6.12799	8.89983e-10	2.95441e-08	ENSG00000053770.12_AP5M1	down	YES
315.516	-2.53124	0.413118	-6.12715	8.94672e-10	2.96379e-08	ENSG00000135549.15_PKIB	down	YES
1185.16	-0.74277	0.121345	-6.12112	9.29218e-10	3.07183e-08	ENSG00000134287.10_ARF3	down	YES
1234.41	0.664312	0.108558	6.11944	9.3906e-10	3.09792e-08	ENSG00000155506.18_LARP1	up	YES
26.323	-1.95305	0.319433	-6.11413	9.7088e-10	3.19627e-08	ENSG00000175600.16_SUGCT	down	YES
44.2958	1.94273	0.317797	6.11311	9.77055e-10	3.20333e-08	ENSG00000135744.9_AGT	up	YES
80.8772	-1.67133	0.273396	-6.11321	9.76452e-10	3.20333e-08	ENSG00000275718.2_CCL15	down	YES
89.2404	-2.48062	0.406168	-6.10738	1.01281e-09	3.30691e-08	ENSG00000168079.17_SCARA5	down	YES
310.989	-1.68809	0.276388	-6.10769	1.01081e-09	3.30691e-08	ENSG00000174640.15_SLCO2A1	down	YES
889.24	0.804613	0.131789	6.10533	1.02591e-09	3.34282e-08	ENSG00000147140.17_NONO	up	YES
2568.78	-1.45254	0.237977	-6.1037	1.0364e-09	3.36322e-08	ENSG00000110090.13_CPT1A	down	YES
209.259	-2.04794	0.335519	-6.10381	1.03568e-09	3.36322e-08	ENSG00000156298.13_TSPAN7	down	YES
58.0074	2.28982	0.375221	6.10261	1.0435e-09	3.37938e-08	ENSG00000060656.20_PTPRU	up	YES
345.023	-1.75204	0.287301	-6.09828	1.07217e-09	3.46516e-08	ENSG00000262655.4_SPON1	down	YES
1050.47	-1.211	0.198648	-6.0962	1.08622e-09	3.50344e-08	ENSG00000123159.16_GIPC1	down	YES
2828.54	-1.54949	0.254326	-6.09254	1.11135e-09	3.57724e-08	ENSG00000184012.14_TMPRSS2	down	YES
215.053	4.07405	0.669089	6.08896	1.13648e-09	3.64339e-08	ENSG00000125538.12_IL1B	up	YES
203.538	1.60706	0.26392	6.0892	1.13477e-09	3.64339e-08	ENSG00000129667.13_RHBDF2	up	YES
40.4409	2.76273	0.454189	6.08277	1.18122e-09	3.7716e-08	ENSG00000018280.17_SLC11A1	up	YES
978.877	-0.956439	0.157234	-6.0829	1.18031e-09	3.7716e-08	ENSG00000135932.11_CAB39	down	YES
13.177	-2.74339	0.451033	-6.08245	1.18363e-09	3.77172e-08	ENSG00000163106.11_HPGDS	down	YES
1963.14	-1.36626	0.224642	-6.08195	1.18729e-09	3.77581e-08	ENSG00000088256.9_GNA11	down	YES
423.682	-0.908841	0.14955	-6.07717	1.22322e-09	3.87458e-08	ENSG00000148158.17_SNX30	down	YES
117.73	-1.78594	0.293875	-6.07723	1.22279e-09	3.87458e-08	ENSG00000179750.16_APOBEC3B	down	YES
443.989	1.23459	0.203179	6.07637	1.22936e-09	3.8863e-08	ENSG00000108773.11_KAT2A	up	YES
206.819	-1.12182	0.18463	-6.07604	1.23186e-09	3.88647e-08	ENSG00000104756.16_KCTD9	down	YES
26.9781	-1.62451	0.267402	-6.07516	1.23861e-09	3.90001e-08	ENSG00000275688.4_CCL15-CCL14	down	YES
710.718	-0.733153	0.120709	-6.07371	1.24987e-09	3.92725e-08	ENSG00000072518.22_MARK2	down	YES
804.308	-0.633175	0.104254	-6.07341	1.2522e-09	3.92725e-08	ENSG00000100280.17_AP1B1	down	YES
141.84	0.580242	0.0955677	6.07153	1.26697e-09	3.95865e-08	ENSG00000070770.10_CSNK2A2	up	YES
113.973	0.916604	0.150968	6.0715	1.26719e-09	3.95865e-08	ENSG00000162065.14_TBC1D24	up	YES
129.139	1.12444	0.18528	6.0689	1.28787e-09	4.01538e-08	ENSG00000064545.15_TMEM161A	up	YES
195.921	-0.783766	0.129184	-6.06707	1.30264e-09	4.05348e-08	ENSG00000213619.11_NDUFS3	down	YES
171.031	-1.45862	0.240548	-6.06375	1.32987e-09	4.13013e-08	ENSG00000186594.14_MIR22HG	down	YES
35.2482	2.0451	0.3373	6.06314	1.33493e-09	4.13777e-08	ENSG00000179862.7_CITED4	up	YES
383.983	2.05915	0.339693	6.06178	1.34624e-09	4.1647e-08	ENSG00000075275.18_CELSR1	up	YES
481.458	1.60622	0.26499	6.06145	1.34898e-09	4.16508e-08	ENSG00000130635.16_COL5A1	up	YES
38.6287	2.65362	0.437854	6.0605	1.35695e-09	4.18156e-08	ENSG00000135960.10_EDAR	up	YES
1046.18	-1.08901	0.179801	-6.05677	1.38885e-09	4.27159e-08	ENSG00000116016.14_EPAS1	down	YES
123.577	-1.20848	0.199744	-6.05015	1.44713e-09	4.44226e-08	ENSG00000189077.11_TMEM120A	down	YES
245.757	1.92703	0.318568	6.04904	1.45709e-09	4.46419e-08	ENSG00000158106.14_RHPN1	up	YES
625.138	-0.648697	0.107282	-6.04665	1.47892e-09	4.52237e-08	ENSG00000075151.23_EIF4G3	down	YES
24.4977	1.8465	0.305446	6.04526	1.49173e-09	4.55277e-08	ENSG00000003249.15_DBNDD1	up	YES
42.1377	2.43476	0.402954	6.04228	1.51956e-09	4.62883e-08	ENSG00000163032.12_VSNL1	up	YES
232.69	-1.48578	0.245946	-6.04108	1.5309e-09	4.65445e-08	ENSG00000104154.7_SLC30A4	down	YES
12.5425	-2.67693	0.443188	-6.04017	1.53954e-09	4.67178e-08	ENSG00000030304.14_MUSK	down	YES
369.731	-1.40976	0.23346	-6.03854	1.55511e-09	4.71006e-08	ENSG00000077463.15_SIRT6	down	YES
33.7159	1.91598	0.317444	6.03564	1.58332e-09	4.78638e-08	ENSG00000188343.13_CIBAR1	up	YES
1092.38	-1.87669	0.311055	-6.03329	1.6065e-09	4.84725e-08	ENSG00000183778.18_B3GALT5	down	YES
3102.27	-2.20695	0.366035	-6.02934	1.64635e-09	4.94934e-08	ENSG00000079385.23_CEACAM1	down	YES
262.429	-2.0335	0.337269	-6.02931	1.64656e-09	4.94934e-08	ENSG00000271447.6_MMP28	down	YES
460.195	-1.29401	0.214649	-6.0285	1.65485e-09	4.95889e-08	ENSG00000125648.15_SLC25A23	down	YES
210.32	-0.976462	0.161977	-6.02839	1.65598e-09	4.95889e-08	ENSG00000250479.9_CHCHD10	down	YES
118.085	-1.00852	0.167376	-6.02548	1.68608e-09	5.03955e-08	ENSG00000197798.9_FAM118B	down	YES
344.374	-1.64846	0.273607	-6.02494	1.69175e-09	5.04699e-08	ENSG00000166311.10_SMPD1	down	YES
100.118	1.2335	0.204931	6.01909	1.75402e-09	5.22297e-08	ENSG00000156697.13_UTP14A	up	YES
92.2471	1.01598	0.168809	6.01851	1.76027e-09	5.23179e-08	ENSG00000174996.12_KLC2	up	YES
82.5593	0.997227	0.165717	6.01764	1.76982e-09	5.25037e-08	ENSG00000136144.12_RCBTB1	up	YES
488.037	-2.33093	0.387381	-6.01715	1.77518e-09	5.25646e-08	ENSG00000184434.8_LRRC19	down	YES
29.8997	1.35001	0.224598	6.0108	1.84605e-09	5.45613e-08	ENSG00000187024.15_PTRH1	up	YES
368.397	-0.942759	0.156874	-6.00965	1.85929e-09	5.48509e-08	ENSG00000167977.9_KCTD5	down	YES
356.246	0.931726	0.155064	6.00865	1.87073e-09	5.50861e-08	ENSG00000133612.19_AGAP3	up	YES
493.997	-1.37315	0.228541	-6.00833	1.87445e-09	5.50935e-08	ENSG00000176597.12_B3GNT5	down	YES
621.002	-0.968306	0.161298	-6.0032	1.93462e-09	5.67571e-08	ENSG00000116171.19_SCP2	down	YES
398.981	1.18922	0.198162	6.00123	1.95833e-09	5.73469e-08	ENSG00000153944.12_MSI2	up	YES
169.173	1.25718	0.2095	6.00086	1.96272e-09	5.737e-08	ENSG00000068366.21_ACSL4	up	YES
45.4673	1.45926	0.243202	6.00019	1.9709e-09	5.75034e-08	ENSG00000168785.8_TSPAN5	up	YES
205.358	1.04905	0.174848	5.99978	1.97583e-09	5.75417e-08	ENSG00000171163.16_ZNF692	up	YES
811.117	1.36667	0.227914	5.99644	2.01691e-09	5.86304e-08	ENSG00000183779.7_ZNF703	up	YES
270.111	1.81263	0.302347	5.99519	2.03244e-09	5.89741e-08	ENSG00000172164.15_SNTB1	up	YES
742.687	1.00222	0.1673	5.99057	2.0911e-09	6.05657e-08	ENSG00000184216.14_IRAK1	up	YES
342.168	0.899212	0.150128	5.98965	2.10292e-09	6.07974e-08	ENSG00000148843.15_PDCD11	up	YES
1460.55	1.11001	0.185337	5.98917	2.1092e-09	6.08682e-08	ENSG00000196187.12_TMEM63A	up	YES
19.0069	-1.8736	0.312871	-5.9884	2.11919e-09	6.10458e-08	ENSG00000234724.1_HDAC1P1	down	YES
247.737	1.15622	0.193242	5.98326	2.18714e-09	6.28892e-08	ENSG00000134815.19_DHX34	up	YES
44.7475	-2.15172	0.359821	-5.97998	2.23164e-09	6.40529e-08	ENSG00000118308.15_IRAG2	down	YES
72.5055	1.28407	0.214763	5.97903	2.24475e-09	6.43131e-08	ENSG00000133065.11_SLC41A1	up	YES
25.5935	-2.05802	0.34425	-5.97828	2.25503e-09	6.44914e-08	ENSG00000237070.1_AC005550.3	down	YES
1912.07	-1.48537	0.248482	-5.97777	2.26218e-09	6.45798e-08	ENSG00000161533.12_ACOX1	down	YES
36.7034	1.36265	0.228215	5.97091	2.35932e-09	6.72321e-08	ENSG00000172731.15_LRRC20	up	YES
1833.67	-1.43685	0.240787	-5.96731	2.41192e-09	6.86081e-08	ENSG00000187446.12_CHP1	down	YES
1508.28	-2.19385	0.367722	-5.96605	2.4307e-09	6.90188e-08	ENSG00000118515.12_SGK1	down	YES
223.167	1.25472	0.210364	5.9645	2.45379e-09	6.95502e-08	ENSG00000070882.13_OSBPL3	up	YES
392.878	-1.12595	0.188865	-5.96167	2.49666e-09	7.0556e-08	ENSG00000060971.19_ACAA1	down	YES
32.3156	-1.75563	0.29449	-5.96158	2.49815e-09	7.0556e-08	ENSG00000076258.10_FMO4	down	YES
516.033	-1.50538	0.252555	-5.9606	2.51311e-09	7.07273e-08	ENSG00000179163.12_FUCA1	down	YES
523.297	-1.21087	0.203138	-5.96082	2.50979e-09	7.07273e-08	ENSG00000198189.11_HSD17B11	down	YES
160.375	-1.0652	0.178716	-5.96031	2.51765e-09	7.07299e-08	ENSG00000119862.13_LGALSL	down	YES
116.088	1.1557	0.194113	5.95376	2.62055e-09	7.3491e-08	ENSG00000108106.14_UBE2S	up	YES
57.5873	1.25801	0.211322	5.95303	2.63217e-09	7.36869e-08	ENSG00000149798.5_CDC42EP2	up	YES
800.493	-1.2401	0.208375	-5.95129	2.66033e-09	7.43444e-08	ENSG00000101782.15_RIOK3	down	YES
76.7894	-2.20273	0.370478	-5.94565	2.7537e-09	7.68186e-08	ENSG00000168229.4_PTGDR	down	YES
60.6745	0.858036	0.144359	5.94377	2.78537e-09	7.75659e-08	ENSG00000180884.10_ZNF792	up	YES
33.9622	1.58393	0.26654	5.94257	2.80591e-09	7.80014e-08	ENSG00000253438.4_PCAT1	up	YES
1006.4	1.05788	0.178037	5.94189	2.81763e-09	7.81904e-08	ENSG00000106263.18_EIF3B	up	YES
322.753	-1.86532	0.31427	-5.93539	2.93151e-09	8.10677e-08	ENSG00000137819.14_PAQR5	down	YES
45.2794	2.43389	0.410057	5.93548	2.92983e-09	8.10677e-08	ENSG00000262188.2_LINC01978	up	YES
134.205	-1.5907	0.268096	-5.93334	2.96835e-09	8.1944e-08	ENSG00000118804.9_STBD1	down	YES
1152.53	-1.38127	0.232834	-5.93242	2.98498e-09	8.22604e-08	ENSG00000150593.18_PDCD4	down	YES
378.6	-0.965591	0.162801	-5.93113	3.00858e-09	8.27671e-08	ENSG00000083937.10_CHMP2B	down	YES
255.119	1.48963	0.251184	5.93043	3.02148e-09	8.29785e-08	ENSG00000196756.13_SNHG17	up	YES
116.985	-2.49387	0.420578	-5.92963	3.03611e-09	8.32366e-08	ENSG00000197165.11_SULT1A2	down	YES
1806.75	-0.684296	0.11545	-5.92719	3.08163e-09	8.4339e-08	ENSG00000072778.20_ACADVL	down	YES
48.617	0.877856	0.148128	5.92632	3.09793e-09	8.46396e-08	ENSG00000184162.15_NR2C2AP	up	YES
418.116	-0.843651	0.142415	-5.92391	3.14374e-09	8.57438e-08	ENSG00000129493.15_HEATR5A	down	YES
2068.09	-1.51161	0.255241	-5.92229	3.17482e-09	8.6443e-08	ENSG00000134755.18_DSC2	down	YES
1328.47	0.857216	0.1448	5.92	3.21949e-09	8.75096e-08	ENSG00000117335.20_CD46	up	YES
45.046	2.56862	0.433984	5.9187	3.24506e-09	8.80008e-08	ENSG00000104899.8_AMH	up	YES
52.287	-2.33998	0.395366	-5.91851	3.24863e-09	8.80008e-08	ENSG00000167779.9_IGFBP6	down	YES
539.691	4.7819	0.808551	5.91416	3.33583e-09	9.02091e-08	ENSG00000169429.11_CXCL8	up	YES
97.8002	1.34933	0.228337	5.9094	3.43352e-09	9.26497e-08	ENSG00000103202.13_NME4	up	YES
2063.72	-1.81195	0.306633	-5.9092	3.43773e-09	9.26497e-08	ENSG00000143167.12_GPA33	down	YES
873.415	-1.75585	0.297194	-5.9081	3.46072e-09	9.31116e-08	ENSG00000040199.18_PHLPP2	down	YES
256.267	-1.10949	0.187816	-5.90734	3.47671e-09	9.32835e-08	ENSG00000157184.7_CPT2	down	YES
40.9609	1.12979	0.191255	5.90724	3.47884e-09	9.32835e-08	ENSG00000185838.14_GNB1L	up	YES
427.374	-0.942277	0.159541	-5.90619	3.50119e-09	9.37247e-08	ENSG00000160445.11_ZER1	down	YES
219.296	0.850062	0.143935	5.90586	3.50818e-09	9.37539e-08	ENSG00000025293.17_PHF20	up	YES
1060.06	-3.34744	0.567053	-5.90322	3.56477e-09	9.51064e-08	ENSG00000204936.10_CD177	down	YES
55.5909	0.834441	0.141412	5.90077	3.61804e-09	9.59718e-08	ENSG00000088356.6_PDRG1	up	YES
455.979	-1.46685	0.24857	-5.90115	3.60972e-09	9.59718e-08	ENSG00000114859.16_CLCN2	down	YES
62.83	1.35022	0.228804	5.9012	3.60864e-09	9.59718e-08	ENSG00000132003.9_ZSWIM4	up	YES
806.415	-0.769798	0.13046	-5.90062	3.62135e-09	9.59718e-08	ENSG00000163110.15_PDLIM5	down	YES
397.384	-0.985312	0.167005	-5.8999	3.63731e-09	9.62345e-08	ENSG00000155744.10_FAM126B	down	YES
207.596	-1.45043	0.245948	-5.89728	3.69537e-09	9.76082e-08	ENSG00000135124.15_P2RX4	down	YES
55.9827	1.33853	0.227118	5.89354	3.78001e-09	9.96781e-08	ENSG00000100350.15_FOXRED2	up	YES
1257.89	-0.975492	0.165561	-5.89204	3.81455e-09	1.00422e-07	ENSG00000170248.15_PDCD6IP	down	YES
129.067	0.782745	0.132858	5.8916	3.82473e-09	1.00524e-07	ENSG00000003393.16_ALS2	up	YES
25.3104	1.54607	0.262467	5.89053	3.84957e-09	1.0101e-07	ENSG00000185761.11_ADAMTSL5	up	YES
149.804	1.25703	0.213469	5.88859	3.89493e-09	1.02032e-07	ENSG00000087077.14_TRIP6	up	YES
909.007	-1.49143	0.253385	-5.88603	3.95585e-09	1.03457e-07	ENSG00000096060.15_FKBP5	down	YES
56.5589	1.32096	0.224597	5.88145	4.0669e-09	1.06187e-07	ENSG00000101190.13_TCFL5	up	YES
448.014	-0.646035	0.109878	-5.87955	4.11391e-09	1.07107e-07	ENSG00000100897.18_DCAF11	down	YES
106.672	0.718668	0.122233	5.87948	4.11562e-09	1.07107e-07	ENSG00000131043.13_AAR2	up	YES
60.9037	3.77554	0.642269	5.87844	4.14142e-09	1.07602e-07	ENSG00000108244.17_KRT23	up	YES
147.582	-1.56306	0.266006	-5.87602	4.20236e-09	1.09008e-07	ENSG00000154822.18_PLCL2	down	YES
210.632	0.65581	0.11162	5.87538	4.21864e-09	1.09252e-07	ENSG00000070061.16_ELP1	up	YES
182.889	0.874181	0.148825	5.87388	4.25705e-09	1.09888e-07	ENSG00000160208.13_RRP1B	up	YES
322.945	1.38467	0.235726	5.87407	4.25236e-09	1.09888e-07	ENSG00000261236.8_BOP1	up	YES
278.286	1.00718	0.171481	5.87342	4.26885e-09	1.10015e-07	ENSG00000061273.18_HDAC7	up	YES
654.006	-0.734369	0.125075	-5.87143	4.32056e-09	1.1115e-07	ENSG00000145349.18_CAMK2D	down	YES
55.5987	3.52177	0.59984	5.87119	4.3269e-09	1.1115e-07	ENSG00000214049.8_UCA1	up	YES
64.1315	-1.09233	0.186101	-5.86957	4.36935e-09	1.11803e-07	ENSG00000101844.18_ATG4A	down	YES
2487.39	-0.942671	0.160602	-5.86959	4.36867e-09	1.11803e-07	ENSG00000162909.18_CAPN2	down	YES
85.8748	-2.4448	0.416532	-5.86941	4.37339e-09	1.11803e-07	ENSG00000170382.12_LRRN2	down	YES
281.767	0.660222	0.112511	5.86809	4.40836e-09	1.12516e-07	ENSG00000213024.12_NUP62	up	YES
395.95	1.15804	0.197406	5.8663	4.45632e-09	1.13558e-07	ENSG00000172216.6_CEBPB	up	YES
275.856	-1.13156	0.19292	-5.86544	4.47947e-09	1.13793e-07	ENSG00000133731.10_IMPA1	down	YES
1642.8	0.57193	0.0975131	5.86516	4.48704e-09	1.13793e-07	ENSG00000153187.20_HNRNPU	up	YES
92.964	1.9285	0.328797	5.86532	4.4826e-09	1.13793e-07	ENSG00000203499.12_IQANK1	up	YES
13.9639	-2.31278	0.394491	-5.8627	4.55398e-09	1.15307e-07	ENSG00000162391.12_FAM151A	down	YES
303.052	-0.515254	0.0879139	-5.86089	4.60384e-09	1.1621e-07	ENSG00000114745.14_GORASP1	down	YES
25.3141	2.17108	0.370436	5.86088	4.60426e-09	1.1621e-07	ENSG00000272168.8_CASC15	up	YES
26.36	1.50655	0.257092	5.85996	4.62968e-09	1.16667e-07	ENSG00000088305.18_DNMT3B	up	YES
77.4704	-2.84857	0.486327	-5.85732	4.70396e-09	1.18351e-07	ENSG00000039987.7_BEST2	down	YES
284.026	0.980247	0.167366	5.85689	4.71603e-09	1.18467e-07	ENSG00000013573.17_DDX11	up	YES
277.556	-1.04702	0.178904	-5.8524	4.84525e-09	1.21521e-07	ENSG00000224051.7_CPTP	down	YES
541.937	-2.32001	0.396444	-5.85204	4.85569e-09	1.21591e-07	ENSG00000148483.9_TMEM236	down	YES
14.2473	-2.11005	0.360731	-5.84938	4.93398e-09	1.23357e-07	ENSG00000189129.14_PLAC9	down	YES
54.7282	0.9239	0.158048	5.8457	5.04437e-09	1.25919e-07	ENSG00000185252.19_ZNF74	up	YES
1902.86	-1.23334	0.211021	-5.84462	5.07729e-09	1.26542e-07	ENSG00000081923.15_ATP8B1	down	YES
5858	-1.83411	0.313917	-5.84264	5.13789e-09	1.27852e-07	ENSG00000171747.9_LGALS4	down	YES
137.75	2.87739	0.492504	5.84237	5.14629e-09	1.27861e-07	ENSG00000136383.7_ALPK3	up	YES
67.8575	1.48079	0.253626	5.83848	5.26806e-09	1.30682e-07	ENSG00000146858.8_ZC3HAV1L	up	YES
1023.14	-1.74515	0.298952	-5.83757	5.29681e-09	1.31191e-07	ENSG00000189221.10_MAOA	down	YES
18.0108	1.56135	0.267511	5.83658	5.32835e-09	1.31767e-07	ENSG00000165886.5_UBTD1	up	YES
87.621	2.36295	0.405018	5.83418	5.40561e-09	1.3347e-07	ENSG00000254166.3_CASC19	up	YES
259.337	1.03145	0.176803	5.83392	5.41412e-09	1.33473e-07	ENSG00000116337.20_AMPD2	up	YES
213.064	1.09134	0.187104	5.83281	5.45015e-09	1.34079e-07	ENSG00000101158.15_NELFCD	up	YES
60.7461	1.04992	0.180008	5.83264	5.45558e-09	1.34079e-07	ENSG00000280195.1_XX-FW83563B9.5	up	YES
15.6223	1.46622	0.251437	5.83135	5.49812e-09	1.34916e-07	ENSG00000171097.14_KYAT1	up	YES
742.708	0.71182	0.122117	5.82901	5.57583e-09	1.36612e-07	ENSG00000263001.7_GTF2I	up	YES
221.906	1.34644	0.231033	5.8279	5.61304e-09	1.37312e-07	ENSG00000203880.12_PCMTD2	up	YES
166.088	-1.09039	0.187194	-5.82494	5.71322e-09	1.39548e-07	ENSG00000167578.18_RAB4B	down	YES
185.192	0.792848	0.136139	5.8238	5.75247e-09	1.40292e-07	ENSG00000148356.15_LRSAM1	up	YES
92.8278	1.21233	0.208196	5.82303	5.77887e-09	1.4072e-07	ENSG00000099889.14_ARVCF	up	YES
193.558	1.52857	0.262681	5.81911	5.9161e-09	1.43841e-07	ENSG00000102024.18_PLS3	up	YES
1272.79	0.864219	0.148532	5.81842	5.94075e-09	1.4422e-07	ENSG00000115053.17_NCL	up	YES
420.019	-1.15993	0.199364	-5.81816	5.95005e-09	1.44225e-07	ENSG00000142867.14_BCL10	down	YES
554.089	-2.48729	0.427661	-5.81603	6.02613e-09	1.45847e-07	ENSG00000119121.22_TRPM6	down	YES
541.776	-0.608764	0.104697	-5.81451	6.08112e-09	1.46954e-07	ENSG00000114331.15_ACAP2	down	YES
418.63	-0.588714	0.101261	-5.81383	6.10598e-09	1.47331e-07	ENSG00000134444.15_RELCH	down	YES
108.368	0.8786	0.151256	5.80868	6.29673e-09	1.51704e-07	ENSG00000104884.17_ERCC2	up	YES
93.2149	1.5638	0.269235	5.80831	6.31051e-09	1.51805e-07	ENSG00000075702.19_WDR62	up	YES
32.5234	2.52541	0.434926	5.80654	6.37775e-09	1.53012e-07	ENSG00000023839.12_ABCC2	up	YES
18.6985	1.10141	0.189686	5.80648	6.3799e-09	1.53012e-07	ENSG00000143498.18_TAF1A	up	YES
266.112	0.816521	0.140754	5.80106	6.58979e-09	1.57808e-07	ENSG00000011275.19_RNF216	up	YES
567.396	0.489887	0.0844524	5.80075	6.602e-09	1.57862e-07	ENSG00000009954.11_BAZ1B	up	YES
308.288	2.4466	0.42181	5.80024	6.62212e-09	1.58106e-07	ENSG00000130513.6_GDF15	up	YES
109.676	0.94431	0.162868	5.79802	6.71009e-09	1.59966e-07	ENSG00000165915.14_SLC39A13	up	YES
7019.14	-1.08207	0.186656	-5.79716	6.74473e-09	1.60342e-07	ENSG00000136068.16_FLNB	down	YES
12.4356	-1.5022	0.259129	-5.79713	6.74602e-09	1.60342e-07	ENSG00000203497.2_PDCD4-AS1	down	YES
134.773	0.93039	0.160503	5.79673	6.7621e-09	1.60484e-07	ENSG00000125630.16_POLR1B	up	YES
178.488	-1.28497	0.221711	-5.79569	6.80412e-09	1.6124e-07	ENSG00000127995.17_CASD1	down	YES
233.997	0.961237	0.166095	5.78727	7.15412e-09	1.69282e-07	ENSG00000179456.10_ZBTB18	up	YES
264.655	0.805998	0.139279	5.78695	7.1678e-09	1.69354e-07	ENSG00000100364.19_KIAA0930	up	YES
240.692	-2.05773	0.355616	-5.78637	7.19231e-09	1.69681e-07	ENSG00000135702.15_CHST5	down	YES
163.385	1.28464	0.222034	5.78579	7.21714e-09	1.69767e-07	ENSG00000183579.16_ZNRF3	up	YES
237.134	-2.17706	0.376277	-5.78579	7.21733e-09	1.69767e-07	ENSG00000260092.1_RP11-77K12.7	down	YES
47.959	1.62068	0.280153	5.785	7.25128e-09	1.70314e-07	ENSG00000136378.15_ADAMTS7	up	YES
121.127	0.901431	0.155888	5.78256	7.35723e-09	1.72548e-07	ENSG00000082516.9_GEMIN5	up	YES
214.272	1.75746	0.304003	5.78107	7.42283e-09	1.73169e-07	ENSG00000101057.16_MYBL2	up	YES
457.129	-0.663281	0.114726	-5.78144	7.40632e-09	1.73169e-07	ENSG00000157916.20_RER1	down	YES
808.158	2.02413	0.3501	5.78158	7.40038e-09	1.73169e-07	ENSG00000168646.13_AXIN2	up	YES
111.463	1.04906	0.181468	5.78097	7.4273e-09	1.73169e-07	ENSG00000249115.9_HAUS5	up	YES
172.074	0.968224	0.167519	5.77978	7.47969e-09	1.74135e-07	ENSG00000130511.16_SSBP4	up	YES
1410.49	-0.850638	0.147205	-5.77858	7.53322e-09	1.75125e-07	ENSG00000162522.11_KIAA1522	down	YES
494.834	-1.71574	0.29693	-5.77826	7.5475e-09	1.75201e-07	ENSG00000152952.12_PLOD2	down	YES
148.827	1.44395	0.250103	5.77341	7.76808e-09	1.80059e-07	ENSG00000124067.17_SLC12A4	up	YES
53.0116	-1.16687	0.202129	-5.77292	7.79099e-09	1.80327e-07	ENSG00000001460.18_STPG1	down	YES
1308.3	-1.40056	0.242625	-5.77253	7.80904e-09	1.80482e-07	ENSG00000168016.15_TRANK1	down	YES
451.782	0.837946	0.145215	5.77039	7.90887e-09	1.82524e-07	ENSG00000068654.17_POLR1A	up	YES
353.933	-1.09023	0.188975	-5.76917	7.96629e-09	1.83583e-07	ENSG00000143198.13_MGST3	down	YES
14.8477	-2.33454	0.404767	-5.76762	8.0399e-09	1.85011e-07	ENSG00000166473.17_PKD1L2	down	YES
1210.36	0.474518	0.0822929	5.76621	8.10736e-09	1.86293e-07	ENSG00000144028.15_SNRNP200	up	YES
176.309	-1.11376	0.193194	-5.765	8.16576e-09	1.87365e-07	ENSG00000171621.14_SPSB1	down	YES
66.9162	1.42318	0.24689	5.76442	8.19368e-09	1.87734e-07	ENSG00000134070.5_IRAK2	up	YES
1061.16	-0.848158	0.147243	-5.76025	8.39878e-09	1.92157e-07	ENSG00000133816.18_MICAL2	down	YES
201.561	1.13298	0.196765	5.75803	8.50999e-09	1.94421e-07	ENSG00000111641.12_NOP2	up	YES
93.7195	1.04812	0.182069	5.75673	8.57611e-09	1.95651e-07	ENSG00000130684.14_ZNF337	up	YES
983.072	-0.920314	0.159911	-5.75516	8.65618e-09	1.97195e-07	ENSG00000084754.12_HADHA	down	YES
90.1265	1.77229	0.30805	5.75327	8.75314e-09	1.99118e-07	ENSG00000104290.11_FZD3	up	YES
242.278	-0.856236	0.148871	-5.75153	8.84402e-09	2.00898e-07	ENSG00000138641.18_HERC3	down	YES
77.161	1.11113	0.193208	5.75096	8.87364e-09	2.01283e-07	ENSG00000117385.16_P3H1	up	YES
92.3526	-1.31065	0.227948	-5.74977	8.93665e-09	2.02424e-07	ENSG00000166821.9_PEX11A	down	YES
9.66044	-2.01669	0.350853	-5.74798	9.0316e-09	2.04284e-07	ENSG00000281100.1_RP11-640L9.2	down	YES
33.2183	1.89093	0.329213	5.7438	9.25743e-09	2.09094e-07	ENSG00000254726.3_MEX3A	up	YES
15.09	1.81167	0.315532	5.74166	9.37543e-09	2.11459e-07	ENSG00000134317.18_GRHL1	up	YES
126.706	1.29649	0.22583	5.74101	9.41119e-09	2.11965e-07	ENSG00000171793.16_CTPS1	up	YES
237.174	-1.28483	0.223903	-5.73833	9.56173e-09	2.15051e-07	ENSG00000170522.10_ELOVL6	down	YES
104.618	-2.21617	0.386225	-5.73804	9.57774e-09	2.15107e-07	ENSG00000225731.1_PDE9A-AS1	down	YES
37.6834	1.20783	0.210522	5.73731	9.61913e-09	2.15125e-07	ENSG00000116670.15_MAD2L2	up	YES
1082.54	-1.40831	0.245454	-5.73758	9.60391e-09	2.15125e-07	ENSG00000128311.14_TST	down	YES
48.0986	1.6679	0.290707	5.7374	9.61393e-09	2.15125e-07	ENSG00000225614.4_ZNF469	up	YES
506.813	-0.774045	0.134936	-5.73638	9.67193e-09	2.16002e-07	ENSG00000176871.9_WSB2	down	YES
1047.14	-0.925639	0.161407	-5.73482	9.76138e-09	2.17694e-07	ENSG00000127334.11_DYRK2	down	YES
69.9341	1.09435	0.190862	5.73373	9.82473e-09	2.188e-07	ENSG00000186767.7_SPIN4	up	YES
798.535	-1.04601	0.182536	-5.73044	1.00169e-08	2.22768e-07	ENSG00000049759.20_NEDD4L	down	YES
115.917	0.724062	0.126369	5.72973	1.0059e-08	2.23392e-07	ENSG00000136875.13_PRPF4	up	YES
1288.05	-1.17464	0.205096	-5.72729	1.02048e-08	2.26313e-07	ENSG00000168924.15_LETM1	down	YES
252.582	-0.741059	0.129449	-5.72473	1.036e-08	2.29435e-07	ENSG00000157538.14_VPS26C	down	YES
541.984	-1.51011	0.263879	-5.72276	1.0481e-08	2.31791e-07	ENSG00000122971.9_ACADS	down	YES
99.433	1.65299	0.288865	5.72237	1.05047e-08	2.31993e-07	ENSG00000133019.12_CHRM3	up	YES
485.336	-1.21939	0.21313	-5.72134	1.05687e-08	2.33082e-07	ENSG00000100744.15_GSKIP	down	YES
525.206	1.23374	0.215756	5.71821	1.07651e-08	2.37085e-07	ENSG00000101444.13_AHCY	up	YES
419.996	0.95824	0.167636	5.71619	1.08939e-08	2.3959e-07	ENSG00000124177.16_CHD6	up	YES
152.85	-1.23271	0.215714	-5.71454	1.10003e-08	2.41595e-07	ENSG00000176894.10_PXMP2	down	YES
304.851	-0.884439	0.154807	-5.71318	1.10886e-08	2.42864e-07	ENSG00000108788.12_MLX	down	YES
754.86	-0.914888	0.160133	-5.71331	1.10797e-08	2.42864e-07	ENSG00000135956.9_TMEM127	down	YES
31.958	1.26285	0.22117	5.70984	1.13084e-08	2.47338e-07	ENSG00000126249.8_PDCD2L	up	YES
268.535	-1.6598	0.290773	-5.70824	1.14149e-08	2.49326e-07	ENSG00000067113.17_PLPP1	down	YES
121.497	1.03834	0.181923	5.70757	1.14603e-08	2.49973e-07	ENSG00000107819.13_SFXN3	up	YES
143.684	-0.97472	0.170801	-5.70674	1.15161e-08	2.50502e-07	ENSG00000008382.16_MPND	down	YES
1237.71	-2.98051	0.52227	-5.70684	1.15094e-08	2.50502e-07	ENSG00000197273.4_GUCA2A	down	YES
826.486	0.668244	0.117129	5.70519	1.16215e-08	2.52451e-07	ENSG00000172534.14_HCFC1	up	YES
50.7432	1.27621	0.223756	5.70358	1.17318e-08	2.54499e-07	ENSG00000130590.14_SAMD10	up	YES
258.366	0.905546	0.15878	5.70314	1.17621e-08	2.54808e-07	ENSG00000070814.22_TCOF1	up	YES
3728.98	-0.651406	0.114243	-5.70191	1.1847e-08	2.56299e-07	ENSG00000198561.16_CTNND1	down	YES
91.4825	0.792157	0.138963	5.70047	1.19476e-08	2.58124e-07	ENSG00000068438.15_FTSJ1	up	YES
32.5918	1.88481	0.330715	5.69919	1.20379e-08	2.59369e-07	ENSG00000141527.18_CARD14	up	YES
291.808	-1.05905	0.185818	-5.69936	1.20256e-08	2.59369e-07	ENSG00000165895.19_ARHGAP42	down	YES
2194.65	-1.4034	0.246262	-5.69883	1.20633e-08	2.59565e-07	ENSG00000131981.16_LGALS3	down	YES
53.8633	-1.40485	0.246551	-5.69802	1.21208e-08	2.6045e-07	ENSG00000124772.12_CPNE5	down	YES
510.984	-0.966042	0.169548	-5.69776	1.21391e-08	2.60491e-07	ENSG00000139132.16_FGD4	down	YES
414.927	-3.00252	0.527045	-5.6969	1.22008e-08	2.61462e-07	ENSG00000174992.8_ZG16	down	YES
100.631	1.26907	0.222783	5.69642	1.2235e-08	2.61843e-07	ENSG00000119771.15_KLHL29	up	YES
25.8659	2.7139	0.476492	5.69557	1.22959e-08	2.62792e-07	ENSG00000164398.15_ACSL6	up	YES
304.011	1.36612	0.239939	5.6936	1.24388e-08	2.65489e-07	ENSG00000049449.10_RCN1	up	YES
41.8485	-1.30116	0.228624	-5.69126	1.26104e-08	2.68791e-07	ENSG00000135407.10_AVIL	down	YES
133.359	1.27868	0.224698	5.69064	1.26566e-08	2.69415e-07	ENSG00000119403.15_PHF19	up	YES
268.541	0.812598	0.142857	5.6882	1.28386e-08	2.72922e-07	ENSG00000149658.18_YTHDF1	up	YES
160.961	-1.81923	0.320268	-5.68035	1.34422e-08	2.85373e-07	ENSG00000263429.3_TMEM238L	down	YES
102.789	1.35205	0.238043	5.67985	1.34811e-08	2.85817e-07	ENSG00000101220.18_C20orf27	up	YES
180.684	1.9308	0.340033	5.67827	1.36066e-08	2.88095e-07	ENSG00000112655.16_PTK7	up	YES
166.448	1.91492	0.337337	5.67658	1.37411e-08	2.90554e-07	ENSG00000075618.18_FSCN1	up	YES
303.692	1.01676	0.179151	5.67545	1.38326e-08	2.91992e-07	ENSG00000148840.11_PPRC1	up	YES
87.9526	0.921986	0.162456	5.67528	1.38458e-08	2.91992e-07	ENSG00000173272.16_MZT2A	up	YES
308.336	-3.92004	0.691181	-5.6715	1.41549e-08	2.98114e-07	ENSG00000183034.13_OTOP2	down	YES
211.845	-2.18209	0.385111	-5.66613	1.46058e-08	3.07204e-07	ENSG00000124205.18_EDN3	down	YES
93.7599	-1.46391	0.258387	-5.66556	1.46547e-08	3.07825e-07	ENSG00000060140.9_STYK1	down	YES
206.723	0.658496	0.116257	5.66416	1.4775e-08	3.09943e-07	ENSG00000100099.21_HPS4	up	YES
27.8853	1.46304	0.258333	5.6634	1.48401e-08	3.10899e-07	ENSG00000265817.4_FSBP	up	YES
12264.2	-2.55878	0.451944	-5.66171	1.49875e-08	3.1275e-07	ENSG00000155850.8_SLC26A2	down	YES
450.856	-2.4548	0.433579	-5.66171	1.49869e-08	3.1275e-07	ENSG00000168447.11_SCNN1B	down	YES
36.907	-2.17849	0.38475	-5.66209	1.4954e-08	3.1275e-07	ENSG00000188828.13_GLRA4	down	YES
318.946	-0.665343	0.117547	-5.66025	1.51152e-08	3.15002e-07	ENSG00000122390.19_NAA60	down	YES
1464.22	-1.50062	0.265182	-5.65882	1.52415e-08	3.17219e-07	ENSG00000059728.11_MXD1	down	YES
617.199	1.16295	0.20558	5.65691	1.5412e-08	3.20348e-07	ENSG00000230590.11_FTX	up	YES
732.573	-1.19751	0.211702	-5.65658	1.54423e-08	3.20558e-07	ENSG00000081026.19_MAGI3	down	YES
11.4367	1.97765	0.349644	5.65619	1.5477e-08	3.20826e-07	ENSG00000168263.9_KCNV2	up	YES
443.307	1.35633	0.239805	5.65598	1.54956e-08	3.20826e-07	ENSG00000182240.16_BACE2	up	YES
199.867	-0.949535	0.167898	-5.65542	1.55463e-08	3.21459e-07	ENSG00000115963.14_RND3	down	YES
4887	-1.63591	0.289287	-5.65498	1.55866e-08	3.21874e-07	ENSG00000135916.16_ITM2C	down	YES
57.1572	1.41076	0.249484	5.65473	1.56093e-08	3.21923e-07	ENSG00000177788.6_RP5-1061H20.4	up	YES
442.465	-1.13667	0.201087	-5.65263	1.58015e-08	3.25466e-07	ENSG00000069956.13_MAPK6	down	YES
27.1421	1.95571	0.346017	5.65206	1.58532e-08	3.26108e-07	ENSG00000073464.13_CLCN4	up	YES
27.7556	-1.96399	0.347504	-5.65169	1.58877e-08	3.26396e-07	ENSG00000144619.15_CNTN4	down	YES
20.8665	1.20113	0.212561	5.65077	1.5973e-08	3.27724e-07	ENSG00000198298.13_ZNF485	up	YES
56.7292	-1.77089	0.313447	-5.64974	1.60695e-08	3.29279e-07	ENSG00000232070.9_TMEM253	down	YES
119.963	0.864754	0.15313	5.6472	1.63084e-08	3.33746e-07	ENSG00000117597.18_UTP25	up	YES
75.2173	1.25435	0.222134	5.64679	1.6347e-08	3.34104e-07	ENSG00000111490.15_TBC1D30	up	YES
383.98	0.770552	0.136582	5.64168	1.68398e-08	3.43735e-07	ENSG00000101150.18_TPD52L2	up	YES
376.958	-0.950396	0.168507	-5.6401	1.6995e-08	3.46458e-07	ENSG00000164142.16_FAM160A1	down	YES
308.347	-0.913692	0.162053	-5.63822	1.71813e-08	3.49807e-07	ENSG00000175309.15_PHYKPL	down	YES
983.955	-0.912568	0.161892	-5.63688	1.73157e-08	3.52093e-07	ENSG00000117298.16_ECE1	down	YES
25.5487	-3.02013	0.535889	-5.63574	1.74312e-08	3.53989e-07	ENSG00000224466.1_CDCA4P2	down	YES
1793.13	-2.14237	0.380205	-5.63478	1.75281e-08	3.5505e-07	ENSG00000117115.13_PADI2	down	YES
379.003	0.67009	0.118919	5.63485	1.75213e-08	3.5505e-07	ENSG00000136699.20_SMPD4	up	YES
44.0142	-0.738172	0.131081	-5.63141	1.78738e-08	3.61592e-07	ENSG00000125434.11_SLC25A35	down	YES
331.119	-1.70496	0.302788	-5.63086	1.79312e-08	3.62293e-07	ENSG00000152078.10_TLCD4	down	YES
597.989	-0.848539	0.150701	-5.63062	1.79567e-08	3.62348e-07	ENSG00000080815.19_PSEN1	down	YES
260.192	0.658269	0.116928	5.62969	1.80531e-08	3.63831e-07	ENSG00000163872.16_YEATS2	up	YES
40.9941	1.89638	0.33695	5.62808	1.82225e-08	3.66779e-07	ENSG00000143507.18_DUSP10	up	YES
98.4787	1.14089	0.202757	5.62688	1.83496e-08	3.6887e-07	ENSG00000116649.10_SRM	up	YES
418.262	-0.68554	0.121841	-5.62651	1.83894e-08	3.69205e-07	ENSG00000170185.11_USP38	down	YES
804.165	-0.873363	0.15525	-5.62552	1.84949e-08	3.70854e-07	ENSG00000101160.15_CTSZ	down	YES
564.551	-1.29801	0.230859	-5.62253	1.88182e-08	3.76861e-07	ENSG00000092421.17_SEMA6A	down	YES
394.657	0.966298	0.171909	5.62099	1.89867e-08	3.79757e-07	ENSG00000108557.19_RAI1	up	YES
367.648	0.601712	0.107056	5.62052	1.90388e-08	3.80322e-07	ENSG00000272391.6_POM121C	up	YES
98.3833	2.94472	0.52411	5.61853	1.92592e-08	3.84241e-07	ENSG00000123689.6_G0S2	up	YES
154.78	-0.434198	0.0772842	-5.6182	1.9296e-08	3.84492e-07	ENSG00000149357.10_LAMTOR1	down	YES
765.636	-1.4296	0.254502	-5.61725	1.94017e-08	3.86116e-07	ENSG00000163683.12_SMIM14	down	YES
80.6842	0.889168	0.158367	5.6146	1.97022e-08	3.91607e-07	ENSG00000111364.16_DDX55	up	YES
1038.11	-1.47761	0.263401	-5.60972	2.02659e-08	4.02307e-07	ENSG00000170915.9_PAQR8	down	YES
137.55	1.29756	0.231374	5.60807	2.04597e-08	4.05649e-07	ENSG00000241343.10_RPL36A	up	YES
352.578	1.13686	0.202734	5.60765	2.05096e-08	4.06131e-07	ENSG00000119285.11_HEATR1	up	YES
1107.61	-1.54468	0.275508	-5.60667	2.06262e-08	4.07932e-07	ENSG00000198682.13_PAPSS2	down	YES
160.469	1.5267	0.272442	5.60377	2.09742e-08	4.143e-07	ENSG00000120341.18_SEC16B	up	YES
155.598	1.01048	0.180349	5.6029	2.10791e-08	4.15854e-07	ENSG00000055044.11_NOP58	up	YES
392.649	-1.33047	0.237516	-5.60161	2.12365e-08	4.1844e-07	ENSG00000203865.11_ATP1A1-AS1	down	YES
82.236	1.06384	0.189965	5.60019	2.14117e-08	4.20401e-07	ENSG00000068137.15_PLEKHH3	up	YES
827.117	-1.37662	0.245818	-5.60016	2.14153e-08	4.20401e-07	ENSG00000151715.8_TMEM45B	down	YES
23.983	1.89252	0.337925	5.60043	2.13821e-08	4.20401e-07	ENSG00000152669.9_CCNO	up	YES
32.8945	-1.22053	0.217995	-5.59892	2.15688e-08	4.22892e-07	ENSG00000153790.12_C7orf31	down	YES
9.79193	2.41776	0.432213	5.59392	2.21998e-08	4.34727e-07	ENSG00000287656.1_RP11-72O9.5	up	YES
265.51	-1.25626	0.224587	-5.59364	2.22354e-08	4.3489e-07	ENSG00000136052.10_SLC41A2	down	YES
110.452	0.953209	0.170436	5.59276	2.23482e-08	4.36559e-07	ENSG00000113552.16_GNPDA1	up	YES
118.123	-0.659856	0.118019	-5.59108	2.25663e-08	4.40278e-07	ENSG00000125037.12_EMC3	down	YES
790.11	-1.48685	0.266114	-5.58728	2.3065e-08	4.49144e-07	ENSG00000080031.10_PTPRH	down	YES
395.496	-0.972608	0.174078	-5.58719	2.30772e-08	4.49144e-07	ENSG00000107242.20_PIP5K1B	down	YES
37.8019	0.913029	0.163423	5.5869	2.31158e-08	4.49344e-07	ENSG00000169016.17_E2F6	up	YES
231.965	0.882948	0.158052	5.58644	2.31775e-08	4.49995e-07	ENSG00000106344.8_RBM28	up	YES
2046.25	-0.70394	0.12602	-5.58592	2.3246e-08	4.50175e-07	ENSG00000002834.18_LASP1	down	YES
28.457	1.0362	0.185498	5.58604	2.32306e-08	4.50175e-07	ENSG00000101132.10_PFDN4	up	YES
98.2828	2.46396	0.441116	5.58573	2.32717e-08	4.50175e-07	ENSG00000133067.18_LGR6	up	YES
89.3129	0.875205	0.156745	5.58363	2.3555e-08	4.55101e-07	ENSG00000011260.14_UTP18	up	YES
361.192	-2.16218	0.387559	-5.57896	2.41957e-08	4.66912e-07	ENSG00000146039.11_SLC17A4	down	YES
1128.9	-1.14046	0.204585	-5.57453	2.482e-08	4.78379e-07	ENSG00000131069.20_ACSS2	down	YES
212.017	2.35462	0.422477	5.57337	2.49858e-08	4.80991e-07	ENSG00000139292.13_LGR5	up	YES
708.934	1.13048	0.202866	5.57254	2.51049e-08	4.82701e-07	ENSG00000152767.17_FARP1	up	YES
72.2882	1.39272	0.249947	5.57206	2.51739e-08	4.83443e-07	ENSG00000151746.15_BICD1	up	YES
173.666	0.999111	0.179358	5.5705	2.54008e-08	4.87212e-07	ENSG00000101868.13_POLA1	up	YES
117.679	1.75468	0.315182	5.56721	2.58855e-08	4.95314e-07	ENSG00000087116.16_ADAMTS2	up	YES
170.815	0.840202	0.150915	5.56737	2.58606e-08	4.95314e-07	ENSG00000162885.14_B3GALNT2	up	YES
332.345	1.02584	0.184325	5.56538	2.6158e-08	4.99925e-07	ENSG00000101294.18_HM13	up	YES
272.662	0.647772	0.116429	5.56366	2.6417e-08	5.04082e-07	ENSG00000083520.15_DIS3	up	YES
184.337	0.856622	0.153971	5.56352	2.64389e-08	5.04082e-07	ENSG00000146909.8_NOM1	up	YES
49.0053	-1.84881	0.332367	-5.56257	2.65837e-08	5.06236e-07	ENSG00000138061.12_CYP1B1	down	YES
1004.48	-0.678191	0.121936	-5.56184	2.66944e-08	5.07736e-07	ENSG00000023228.14_NDUFS1	down	YES
76.7264	-2.62282	0.471671	-5.5607	2.68693e-08	5.09844e-07	ENSG00000132915.11_PDE6A	down	YES
267.105	1.87356	0.336922	5.5608	2.68538e-08	5.09844e-07	ENSG00000162591.16_MEGF6	up	YES
25.6918	1.58325	0.284777	5.5596	2.70399e-08	5.1247e-07	ENSG00000161647.19_MPP3	up	YES
216.033	0.664545	0.119578	5.5574	2.7383e-08	5.18354e-07	ENSG00000204713.11_TRIM27	up	YES
527.595	-0.940874	0.169314	-5.55696	2.74508e-08	5.18404e-07	ENSG00000085491.17_SLC25A24	down	YES
341.867	-2.28629	0.411414	-5.55715	2.74208e-08	5.18404e-07	ENSG00000137634.10_NXPE4	down	YES
43.192	-2.05302	0.369524	-5.55585	2.76268e-08	5.21107e-07	ENSG00000064655.19_EYA2	down	YES
96.6496	1.38949	0.250117	5.55537	2.77019e-08	5.21906e-07	ENSG00000172965.17_MIR4435-2HG	up	YES
1288.29	-1.44239	0.259789	-5.55216	2.82163e-08	5.30968e-07	ENSG00000112782.19_CLIC5	down	YES
156.189	-1.61288	0.290507	-5.55194	2.82513e-08	5.30998e-07	ENSG00000119686.10_FLVCR2	down	YES
142.91	0.900754	0.162248	5.55173	2.82863e-08	5.31028e-07	ENSG00000141569.12_TRIM65	up	YES
336.924	1.16744	0.210309	5.55104	2.83982e-08	5.32501e-07	ENSG00000134107.5_BHLHE40	up	YES
67.7771	2.42358	0.436759	5.54899	2.87317e-08	5.38119e-07	ENSG00000101144.13_BMP7	up	YES
28.2526	1.49787	0.269954	5.5486	2.87965e-08	5.38697e-07	ENSG00000138411.13_HECW2	up	YES
540.842	0.911568	0.164302	5.54812	2.88762e-08	5.39555e-07	ENSG00000101161.8_PRPF6	up	YES
191.345	0.854177	0.153968	5.54776	2.8936e-08	5.40036e-07	ENSG00000083444.17_PLOD1	up	YES
153.536	2.39433	0.431724	5.54598	2.92318e-08	5.44918e-07	ENSG00000140678.17_ITGAX	up	YES
148.195	-1.08006	0.194761	-5.54559	2.92963e-08	5.4548e-07	ENSG00000135828.11_RNASEL	down	YES
206.354	0.651378	0.117537	5.54191	2.99188e-08	5.5642e-07	ENSG00000058600.16_POLR3E	up	YES
423.554	-1.29999	0.234672	-5.53959	3.03178e-08	5.63181e-07	ENSG00000116574.6_RHOU	down	YES
42.8209	-1.732	0.312727	-5.53837	3.05298e-08	5.66458e-07	ENSG00000187824.9_TMEM220	down	YES
304.935	1.16261	0.209971	5.53699	3.07708e-08	5.70265e-07	ENSG00000125772.14_GPCPD1	up	YES
93.3292	0.826765	0.149338	5.5362	3.09113e-08	5.72201e-07	ENSG00000090097.22_PCBP4	up	YES
100.464	1.22788	0.221906	5.53337	3.14141e-08	5.80832e-07	ENSG00000025772.8_TOMM34	up	YES
222.945	0.98121	0.177391	5.53133	3.17804e-08	5.86922e-07	ENSG00000185920.17_PTCH1	up	YES
179.041	-0.725309	0.131154	-5.53023	3.19811e-08	5.89943e-07	ENSG00000158793.14_NIT1	down	YES
377.378	-0.854205	0.154503	-5.52871	3.22596e-08	5.94391e-07	ENSG00000162852.14_CNST	down	YES
256.391	1.26981	0.229834	5.52493	3.29625e-08	6.06641e-07	ENSG00000076716.9_GPC4	up	YES
177.835	1.49754	0.271203	5.52184	3.35476e-08	6.16545e-07	ENSG00000132613.15_MTSS2	up	YES
764.483	-1.20322	0.217909	-5.52168	3.35782e-08	6.16545e-07	ENSG00000137767.14_SQOR	down	YES
92.5005	1.69172	0.306401	5.52126	3.36571e-08	6.1728e-07	ENSG00000136854.24_STXBP1	up	YES
96.5049	-2.83074	0.512739	-5.52081	3.37438e-08	6.18156e-07	ENSG00000257524.6_RP11-203J24.9	down	YES
138.641	-1.9367	0.35085	-5.52002	3.38956e-08	6.20223e-07	ENSG00000153233.13_PTPRR	down	YES
11.4516	1.77585	0.321916	5.51649	3.45837e-08	6.32086e-07	ENSG00000127423.11_AUNIP	up	YES
45.5505	1.62748	0.295085	5.51529	3.48207e-08	6.35688e-07	ENSG00000181218.5_H2AW	up	YES
208.169	1.23324	0.223645	5.51427	3.50232e-08	6.38651e-07	ENSG00000130826.18_DKC1	up	YES
48.1845	-2.87795	0.521987	-5.51344	3.51885e-08	6.40931e-07	ENSG00000117322.18_CR2	down	YES
1682.5	-0.623798	0.113149	-5.51308	3.52614e-08	6.41524e-07	ENSG00000197879.17_MYO1C	down	YES
439.851	-1.12884	0.204908	-5.50902	3.60838e-08	6.55735e-07	ENSG00000198894.8_CIPC	down	YES
48.7085	2.44938	0.444651	5.50854	3.61824e-08	6.56777e-07	ENSG00000258947.8_TUBB3	up	YES
57.7695	1.24027	0.225242	5.5064	3.6624e-08	6.63278e-07	ENSG00000104312.8_RIPK2	up	YES
35.7411	2.81101	0.51049	5.5065	3.66042e-08	6.63278e-07	ENSG00000163220.11_S100A9	up	YES
86.4565	1.03674	0.188315	5.50535	3.68433e-08	6.66491e-07	ENSG00000125485.17_DDX31	up	YES
214.237	0.970276	0.176263	5.50471	3.69776e-08	6.68161e-07	ENSG00000124228.15_DDX27	up	YES
96.9478	1.01511	0.184459	5.50317	3.73013e-08	6.73245e-07	ENSG00000149636.16_DSN1	up	YES
46.3685	1.41002	0.256276	5.50195	3.75611e-08	6.76854e-07	ENSG00000118965.16_WDR35	up	YES
95.0249	1.69391	0.30788	5.50183	3.75864e-08	6.76854e-07	ENSG00000175063.17_UBE2C	up	YES
267.318	1.18084	0.214729	5.49919	3.8153e-08	6.8628e-07	ENSG00000166197.17_NOLC1	up	YES
146.673	1.97799	0.360277	5.49019	4.01498e-08	7.21381e-07	ENSG00000141756.19_FKBP10	up	YES
108.138	0.887807	0.161731	5.48941	4.03269e-08	7.23745e-07	ENSG00000162836.12_ACP6	up	YES
202.037	0.929761	0.169418	5.48798	4.06565e-08	7.28838e-07	ENSG00000152117.17_SMPD4BP	up	YES
337.632	0.579503	0.105701	5.48248	4.19401e-08	7.51001e-07	ENSG00000108262.16_GIT1	up	YES
86.857	2.62207	0.478397	5.48096	4.23026e-08	7.56641e-07	ENSG00000262406.3_MMP12	up	YES
1516.75	-1.11196	0.202901	-5.48034	4.2452e-08	7.5846e-07	ENSG00000149260.18_CAPN5	down	YES
173.885	1.10355	0.201437	5.47838	4.29245e-08	7.66041e-07	ENSG00000101407.13_TTI1	up	YES
124.806	-1.33644	0.24397	-5.47787	4.30477e-08	7.67379e-07	ENSG00000060762.19_MPC1	down	YES
309.53	-1.59188	0.290724	-5.47559	4.36057e-08	7.76455e-07	ENSG00000184828.10_ZBTB7C	down	YES
1818.62	-0.972707	0.177699	-5.4739	4.40234e-08	7.82553e-07	ENSG00000075539.15_FRYL	down	YES
534.091	-0.931344	0.170145	-5.47381	4.40466e-08	7.82553e-07	ENSG00000109586.12_GALNT7	down	YES
118.279	0.983219	0.179713	5.47105	4.47386e-08	7.9396e-07	ENSG00000146540.15_C7orf50	up	YES
275.816	-0.901562	0.164818	-5.47006	4.49886e-08	7.97441e-07	ENSG00000110721.12_CHKA	down	YES
549.155	0.892387	0.163146	5.46988	4.5035e-08	7.97441e-07	ENSG00000171552.14_BCL2L1	up	YES
1455.83	-1.29352	0.236552	-5.46822	4.54581e-08	8.04037e-07	ENSG00000050405.13_LIMA1	down	YES
95.7927	1.31295	0.240158	5.46702	4.57657e-08	8.06883e-07	ENSG00000101447.15_FAM83D	up	YES
438.302	-0.933129	0.170684	-5.467	4.57712e-08	8.06883e-07	ENSG00000172936.16_MYD88	down	YES
302.287	0.785237	0.143623	5.46734	4.56839e-08	8.06883e-07	ENSG00000198700.10_IPO9	up	YES
107.752	0.851386	0.155761	5.46596	4.60402e-08	8.10726e-07	ENSG00000130305.17_NSUN5	up	YES
73.6691	2.05688	0.37659	5.46185	4.71207e-08	8.28835e-07	ENSG00000125508.4_SRMS	up	YES
175.85	1.40979	0.258208	5.45988	4.76452e-08	8.37135e-07	ENSG00000204262.14_COL5A2	up	YES
2953.73	-0.873612	0.160092	-5.45695	4.84389e-08	8.49203e-07	ENSG00000117984.15_CTSD	down	YES
87.1361	-1.71861	0.314935	-5.45702	4.84198e-08	8.49203e-07	ENSG00000179674.4_ARL14	down	YES
1846.69	-0.89666	0.16434	-5.45611	4.86671e-08	8.52263e-07	ENSG00000067082.15_KLF6	down	YES
9.93404	-2.40998	0.441854	-5.45426	4.91784e-08	8.6027e-07	ENSG00000243188.1_HNRNPA1P17	down	YES
631.86	1.66502	0.305304	5.45366	4.93439e-08	8.60827e-07	ENSG00000134871.19_COL4A2	up	YES
130.822	0.729882	0.133836	5.45356	4.93726e-08	8.60827e-07	ENSG00000198000.12_NOL8	up	YES
37.0359	0.949059	0.174024	5.45361	4.93569e-08	8.60827e-07	ENSG00000213588.6_ZBTB9	up	YES
42.0241	2.72057	0.498881	5.45334	4.94334e-08	8.60942e-07	ENSG00000136002.20_ARHGEF4	up	YES
74.7851	0.869678	0.159543	5.45105	5.0073e-08	8.71129e-07	ENSG00000166860.3_ZBTB39	up	YES
241.178	-0.990559	0.181733	-5.45062	5.01945e-08	8.72288e-07	ENSG00000196116.8_TDRD7	down	YES
428.117	-0.698744	0.128209	-5.45003	5.03613e-08	8.74231e-07	ENSG00000167193.8_CRK	down	YES
195.739	-0.83756	0.153715	-5.44878	5.07163e-08	8.79433e-07	ENSG00000144909.8_OSBPL11	down	YES
395.005	-0.778116	0.142823	-5.44813	5.09027e-08	8.81703e-07	ENSG00000111670.16_GNPTAB	down	YES
273.605	0.808769	0.148472	5.44728	5.11461e-08	8.84788e-07	ENSG00000162430.18_SELENON	up	YES
66.0387	-1.57519	0.289179	-5.44712	5.1192e-08	8.84788e-07	ENSG00000287045.1_RP11-190C21.5	down	YES
562.432	0.775424	0.142364	5.44677	5.12925e-08	8.85562e-07	ENSG00000106397.12_PLOD3	up	YES
541.089	-0.798605	0.146677	-5.44465	5.19084e-08	8.95224e-07	ENSG00000136436.15_CALCOCO2	down	YES
43.9371	1.97409	0.362587	5.44445	5.1966e-08	8.95245e-07	ENSG00000054598.9_FOXC1	up	YES
234.224	-0.588128	0.108063	-5.44245	5.25534e-08	9.04385e-07	ENSG00000138032.21_PPM1B	down	YES
56.1429	1.90954	0.351085	5.43895	5.35943e-08	9.213e-07	ENSG00000272899.4_ATP6V1FNB	up	YES
594.759	-2.04131	0.375365	-5.4382	5.38217e-08	9.24211e-07	ENSG00000253958.2_CLDN23	down	YES
77.5086	1.31886	0.242538	5.43774	5.39614e-08	9.2561e-07	ENSG00000004660.15_CAMKK1	up	YES
54.9045	-1.14659	0.210893	-5.43687	5.42256e-08	9.2914e-07	ENSG00000122035.7_RASL11A	down	YES
582.162	0.995178	0.183074	5.43594	5.45072e-08	9.32959e-07	ENSG00000171456.20_ASXL1	up	YES
481.604	0.899918	0.165569	5.43532	5.46986e-08	9.35229e-07	ENSG00000213923.13_CSNK1E	up	YES
559.198	-1.1083	0.204034	-5.43191	5.57552e-08	9.52271e-07	ENSG00000081320.11_STK17B	down	YES
428.336	-0.7842	0.144383	-5.43138	5.59185e-08	9.54035e-07	ENSG00000140750.17_ARHGAP17	down	YES
29.8864	1.62211	0.298706	5.43047	5.6207e-08	9.57929e-07	ENSG00000148848.15_ADAM12	up	YES
112.501	1.02675	0.189136	5.42865	5.67834e-08	9.66716e-07	ENSG00000188807.13_TMEM201	up	YES
19.4558	1.03459	0.190609	5.4278	5.70525e-08	9.70259e-07	ENSG00000159685.11_CHCHD6	up	YES
76.6084	-1.85505	0.341857	-5.42638	5.75069e-08	9.76941e-07	ENSG00000254827.6_SLC22A18AS	down	YES
470.158	0.953375	0.175852	5.42147	5.91114e-08	1.00313e-06	ENSG00000204394.13_VARS1	up	YES
49.0065	3.02378	0.558085	5.41814	6.02226e-08	1.02089e-06	ENSG00000163083.6_INHBB	up	YES
2493.75	-1.79794	0.331876	-5.4175	6.04375e-08	1.02345e-06	ENSG00000117472.10_TSPAN1	down	YES
12.8145	1.57594	0.290924	5.41703	6.05967e-08	1.02505e-06	ENSG00000271155.1_RP11-435O5.5	up	YES
68.8601	0.815797	0.150617	5.41638	6.08168e-08	1.02768e-06	ENSG00000078319.10_PMS2P1	up	YES
13.2593	-2.02587	0.374156	-5.41451	6.1458e-08	1.03741e-06	ENSG00000280119.1_AC093642.1	down	YES
856.068	-1.74794	0.322963	-5.41218	6.22629e-08	1.04877e-06	ENSG00000125775.15_SDCBP2	down	YES
667.179	1.36327	0.251885	5.41228	6.22274e-08	1.04877e-06	ENSG00000159335.18_PTMS	up	YES
111.719	-0.916321	0.169337	-5.41121	6.25995e-08	1.05333e-06	ENSG00000152465.18_NMT2	down	YES
185.884	0.813272	0.15037	5.40849	6.35593e-08	1.06835e-06	ENSG00000226479.4_TMEM185B	up	YES
362.288	3.98338	0.736612	5.40771	6.38355e-08	1.07186e-06	ENSG00000215182.8_MUC5AC	up	YES
157.167	0.554745	0.102636	5.40498	6.48172e-08	1.08719e-06	ENSG00000106290.15_TAF6	up	YES
254.931	-2.00653	0.371361	-5.4032	6.54631e-08	1.09664e-06	ENSG00000166391.15_MOGAT2	down	YES
265.97	0.941125	0.174184	5.40305	6.55183e-08	1.09664e-06	ENSG00000187764.12_SEMA4D	up	YES
198.962	-1.55946	0.288753	-5.40069	6.63867e-08	1.11001e-06	ENSG00000131781.13_FMO5	down	YES
964.811	-0.940575	0.174227	-5.39856	6.71784e-08	1.122e-06	ENSG00000135540.11_NHSL1	down	YES
33.7555	1.30921	0.242519	5.39838	6.72453e-08	1.122e-06	ENSG00000197763.20_TXNRD3	up	YES
176.421	-2.1957	0.406944	-5.3956	6.82968e-08	1.13835e-06	ENSG00000163520.14_FBLN2	down	YES
326.708	-0.874186	0.162062	-5.39415	6.8848e-08	1.14634e-06	ENSG00000172197.11_MBOAT1	down	YES
390.788	1.21114	0.224604	5.39233	6.95491e-08	1.15559e-06	ENSG00000138031.15_ADCY3	up	YES
55.0629	1.70566	0.316305	5.39246	6.94995e-08	1.15559e-06	ENSG00000138606.19_SHF	up	YES
63.787	1.26696	0.234985	5.39168	6.98001e-08	1.15855e-06	ENSG00000132879.14_FBXO44	up	YES
453.607	0.884651	0.164129	5.38998	7.04639e-08	1.16835e-06	ENSG00000120889.13_TNFRSF10B	up	YES
168.31	0.815661	0.151363	5.38877	7.09429e-08	1.17507e-06	ENSG00000141101.13_NOB1	up	YES
1496.19	0.73791	0.136961	5.38776	7.1342e-08	1.18045e-06	ENSG00000089154.11_GCN1	up	YES
176.826	0.843944	0.156712	5.38533	7.23112e-08	1.19524e-06	ENSG00000067955.15_CBFB	up	YES
554.345	-0.873426	0.162242	-5.38349	7.30571e-08	1.20631e-06	ENSG00000162390.18_ACOT11	down	YES
218.313	0.842624	0.156538	5.38286	7.33131e-08	1.20929e-06	ENSG00000187231.14_SESTD1	up	YES
635.469	-1.26684	0.235412	-5.38138	7.39171e-08	1.21799e-06	ENSG00000110013.13_SIAE	down	YES
153.048	-0.782107	0.14535	-5.38084	7.41398e-08	1.22039e-06	ENSG00000117305.15_HMGCL	down	YES
1015.51	-0.972336	0.180737	-5.37982	7.45589e-08	1.22475e-06	ENSG00000165959.12_CLMN	down	YES
359.056	-1.17138	0.217734	-5.37989	7.45314e-08	1.22475e-06	ENSG00000181350.12_LRRC75A	down	YES
63.4997	-1.24653	0.231741	-5.37898	7.49098e-08	1.22925e-06	ENSG00000258311.5_RP11-644F5.10	down	YES
982.438	-0.72393	0.1346	-5.37837	7.51652e-08	1.23217e-06	ENSG00000109787.13_KLF3	down	YES
5294.83	-2.20831	0.410672	-5.3773	7.56092e-08	1.23817e-06	ENSG00000171431.4_KRT20	down	YES
119.054	0.882432	0.16415	5.37576	7.62592e-08	1.24753e-06	ENSG00000130810.20_PPAN	up	YES
109.547	-3.229	0.600753	-5.37493	7.66122e-08	1.25201e-06	ENSG00000104332.12_SFRP1	down	YES
535.692	-0.638897	0.118877	-5.37442	7.68286e-08	1.25426e-06	ENSG00000172869.15_DMXL1	down	YES
183.058	-0.859265	0.159924	-5.37296	7.74557e-08	1.2632e-06	ENSG00000067064.12_IDI1	down	YES
283.271	-1.51921	0.282844	-5.3712	7.8213e-08	1.27425e-06	ENSG00000106688.12_SLC1A1	down	YES
168.847	1.19012	0.22178	5.36622	8.04044e-08	1.30861e-06	ENSG00000138074.15_SLC5A6	up	YES
57.414	0.841071	0.156794	5.36417	8.13204e-08	1.32216e-06	ENSG00000110987.9_BCL7A	up	YES
246.345	1.1184	0.208518	5.36358	8.15879e-08	1.32516e-06	ENSG00000102316.17_MAGED2	up	YES
182.705	1.84874	0.344978	5.359	8.36857e-08	1.35784e-06	ENSG00000088340.17_FER1L4	up	YES
96.314	0.747729	0.139552	5.35807	8.41143e-08	1.36341e-06	ENSG00000065989.16_PDE4A	up	YES
885.092	-0.695864	0.12989	-5.35734	8.44572e-08	1.36757e-06	ENSG00000115762.16_PLEKHB2	down	YES
94.2857	1.66053	0.310181	5.35344	8.6299e-08	1.39597e-06	ENSG00000111674.9_ENO2	up	YES
80.204	1.68319	0.314454	5.35273	8.66352e-08	1.39999e-06	ENSG00000164690.8_SHH	up	YES
483.473	-1.48499	0.277461	-5.35209	8.69456e-08	1.40358e-06	ENSG00000115129.14_TP53I3	down	YES
235.078	0.762015	0.142382	5.35189	8.70398e-08	1.40367e-06	ENSG00000196363.10_WDR5	up	YES
133.22	0.8892	0.166199	5.35022	8.78458e-08	1.41523e-06	ENSG00000071462.12_BUD23	up	YES
2291.2	-1.20774	0.225744	-5.35004	8.79345e-08	1.41523e-06	ENSG00000163694.15_RBM47	down	YES
104.296	-1.37038	0.256251	-5.34779	8.90338e-08	1.43147e-06	ENSG00000156869.14_FRRS1	down	YES
228.082	3.71497	0.694915	5.34593	8.99536e-08	1.4448e-06	ENSG00000015413.9_DPEP1	up	YES
180.479	0.973699	0.182193	5.34432	9.07559e-08	1.45622e-06	ENSG00000165271.17_NOL6	up	YES
71.0967	1.59827	0.29912	5.34326	9.12909e-08	1.46185e-06	ENSG00000135245.10_HILPDA	up	YES
29.0209	-1.7951	0.335952	-5.34332	9.12591e-08	1.46185e-06	ENSG00000171658.8_NMRAL2P	down	YES
243.858	-0.527994	0.0988503	-5.34135	9.22553e-08	1.47581e-06	ENSG00000153066.13_TXNDC11	down	YES
252.425	-0.602902	0.112883	-5.34095	9.24628e-08	1.47764e-06	ENSG00000100150.20_DEPDC5	down	YES
240.352	-1.25577	0.235297	-5.33696	9.45184e-08	1.50897e-06	ENSG00000154274.15_C4orf19	down	YES
1986.73	-3.65578	0.685192	-5.33541	9.53282e-08	1.52037e-06	ENSG00000103375.11_AQP8	down	YES
113.365	0.908761	0.170344	5.33484	9.56263e-08	1.5236e-06	ENSG00000137161.17_CNPY3	up	YES
598.735	-0.85403	0.160165	-5.33217	9.70435e-08	1.54463e-06	ENSG00000140497.16_SCAMP2	down	YES
930.389	-1.21443	0.227767	-5.33191	9.71831e-08	1.54531e-06	ENSG00000111424.12_VDR	down	YES
77.0018	-1.96403	0.368424	-5.3309	9.7728e-08	1.55242e-06	ENSG00000172318.5_B3GALT1	down	YES
57.8311	1.24557	0.233703	5.3297	9.83772e-08	1.56117e-06	ENSG00000128059.8_PPAT	up	YES
619.594	-1.00282	0.188171	-5.32929	9.85987e-08	1.56313e-06	ENSG00000100221.11_JOSD1	down	YES
149.888	-1.76581	0.331401	-5.32831	9.91323e-08	1.57002e-06	ENSG00000164342.13_TLR3	down	YES
235.75	1.16776	0.219225	5.32678	9.99692e-08	1.5817e-06	ENSG00000127586.17_CHTF18	up	YES
19.6631	1.39904	0.26267	5.32621	1.00284e-07	1.5851e-06	ENSG00000105948.13_TTC26	up	YES
30.4924	-1.71752	0.322528	-5.32516	1.00864e-07	1.59268e-06	ENSG00000233217.2_MROH3P	down	YES
152.001	1.18759	0.223028	5.32486	1.01031e-07	1.59374e-06	ENSG00000106070.20_GRB10	up	YES
246.245	1.73622	0.326161	5.32321	1.0195e-07	1.60665e-06	ENSG00000162366.8_PDZK1IP1	up	YES
2272.07	0.597002	0.112191	5.32131	1.03022e-07	1.62194e-06	ENSG00000086758.16_HUWE1	up	YES
103.13	-2.39828	0.450814	-5.31989	1.0383e-07	1.63304e-06	ENSG00000163295.5_ALPI	down	YES
199.114	1.05801	0.198893	5.31947	1.04068e-07	1.63516e-06	ENSG00000157617.17_C2CD2	up	YES
171.773	-1.33624	0.251265	-5.31805	1.04887e-07	1.64641e-06	ENSG00000101695.9_RNF125	down	YES
1332.92	0.745621	0.140211	5.31786	1.04996e-07	1.6465e-06	ENSG00000275023.5_MLLT6	up	YES
60.1036	0.839144	0.157825	5.31693	1.05535e-07	1.65331e-06	ENSG00000185420.19_SMYD3	up	YES
311.825	0.787441	0.148189	5.31377	1.07379e-07	1.68054e-06	ENSG00000075391.17_RASAL2	up	YES
116.725	0.811443	0.152735	5.31275	1.07984e-07	1.68836e-06	ENSG00000136811.16_ODF2	up	YES
334.666	0.745891	0.140414	5.3121	1.08368e-07	1.69269e-06	ENSG00000196365.12_LONP1	up	YES
65.0982	-1.79438	0.337834	-5.31143	1.08767e-07	1.69725e-06	ENSG00000167117.10_ANKRD40CL	down	YES
228.992	-0.621793	0.117077	-5.31095	1.09053e-07	1.70005e-06	ENSG00000100325.15_ASCC2	down	YES
38.1413	-1.31298	0.247459	-5.30583	1.12158e-07	1.74675e-06	ENSG00000182168.15_UNC5C	down	YES
324.163	1.61692	0.30483	5.30433	1.13087e-07	1.75948e-06	ENSG00000088325.16_TPX2	up	YES
277.386	-1.27091	0.239616	-5.30396	1.13318e-07	1.76136e-06	ENSG00000159200.18_RCAN1	down	YES
354.082	-2.06821	0.390149	-5.30106	1.1513e-07	1.78778e-06	ENSG00000095110.8_NXPE1	down	YES
161.556	0.92196	0.173947	5.30024	1.15651e-07	1.79412e-06	ENSG00000013523.11_ANGEL1	up	YES
10.6052	2.6629	0.502842	5.29571	1.18554e-07	1.83736e-06	ENSG00000222033.1_LINC01124	up	YES
153.84	0.788683	0.148937	5.29542	1.18744e-07	1.8385e-06	ENSG00000165689.17_ENTR1	up	YES
99.9462	0.847127	0.16	5.29456	1.19305e-07	1.8454e-06	ENSG00000101146.13_RAE1	up	YES
487.938	-1.95759	0.369759	-5.29424	1.19511e-07	1.84678e-06	ENSG00000115616.3_SLC9A2	down	YES
194.405	-1.13735	0.214876	-5.29305	1.20293e-07	1.85706e-06	ENSG00000173599.15_PC	down	YES
118.345	0.810826	0.153289	5.28951	1.22646e-07	1.88877e-06	ENSG00000101138.12_CSTF1	up	YES
78.6779	0.745878	0.141013	5.28942	1.22703e-07	1.88877e-06	ENSG00000171159.5_C9orf16	up	YES
635.561	-0.596844	0.112836	-5.28948	1.22663e-07	1.88877e-06	ENSG00000174373.17_RALGAPA1	down	YES
155.755	-0.820908	0.15521	-5.28901	1.22978e-07	1.89117e-06	ENSG00000166946.14_CCNDBP1	down	YES
150.988	-1.33974	0.253335	-5.28844	1.23363e-07	1.89526e-06	ENSG00000253313.6_C1orf210	down	YES
431.601	-1.49105	0.282005	-5.28731	1.24131e-07	1.90442e-06	ENSG00000107731.12_UNC5B	down	YES
306.148	-0.598432	0.113185	-5.28721	1.24198e-07	1.90442e-06	ENSG00000164144.16_ARFIP1	down	YES
321.222	2.40968	0.455878	5.2858	1.25157e-07	1.91726e-06	ENSG00000184557.4_SOCS3	up	YES
54.0378	1.49296	0.282523	5.2844	1.26117e-07	1.93011e-06	ENSG00000196584.3_XRCC2	up	YES
66.9648	3.31904	0.628271	5.28282	1.27211e-07	1.94498e-06	ENSG00000196549.13_MME	up	YES
33.8486	-0.959271	0.18159	-5.28262	1.2735e-07	1.94525e-06	ENSG00000170270.5_GON7	down	YES
1056.07	-1.05565	0.199851	-5.28219	1.27648e-07	1.94791e-06	ENSG00000155366.17_RHOC	down	YES
112.986	1.10513	0.209233	5.28179	1.27928e-07	1.95032e-06	ENSG00000176022.7_B3GALT6	up	YES
4577.19	-2.86562	0.542599	-5.28129	1.28278e-07	1.95378e-06	ENSG00000016602.9_CLCA4	down	YES
1470.86	-0.69868	0.132309	-5.28067	1.28713e-07	1.95853e-06	ENSG00000071127.17_WDR1	down	YES
30.8662	1.17868	0.223227	5.28017	1.29062e-07	1.96196e-06	ENSG00000234432.4_RP11-1275H24.1	up	YES
206.299	1.09817	0.207991	5.27988	1.29266e-07	1.96318e-06	ENSG00000180891.13_CUEDC1	up	YES
1181.26	-2.14667	0.406677	-5.27856	1.30206e-07	1.97557e-06	ENSG00000124253.11_PCK1	down	YES
54.6079	1.05999	0.200822	5.27823	1.30436e-07	1.97718e-06	ENSG00000196976.7_LAGE3	up	YES
77.459	1.0559	0.200055	5.27802	1.30586e-07	1.97757e-06	ENSG00000183077.15_AFMID	up	YES
226.885	-1.50178	0.284545	-5.27781	1.30733e-07	1.97792e-06	ENSG00000169860.7_P2RY1	down	YES
26.6204	1.09679	0.207829	5.2774	1.31031e-07	1.98053e-06	ENSG00000145220.14_LYAR	up	YES
30.7075	1.29045	0.244564	5.27655	1.31639e-07	1.98783e-06	ENSG00000056277.16_ZNF280C	up	YES
335.543	-1.07996	0.204681	-5.27632	1.31804e-07	1.98844e-06	ENSG00000137364.5_TPMT	down	YES
95.5186	0.896848	0.170014	5.27513	1.32664e-07	1.99951e-06	ENSG00000148335.15_NTMT1	up	YES
637.877	-0.873846	0.165699	-5.27369	1.33708e-07	2.01335e-06	ENSG00000100614.18_PPM1A	down	YES
82.1229	2.65431	0.503512	5.2716	1.3524e-07	2.03448e-06	ENSG00000184956.16_MUC6	up	YES
683.8	-0.498678	0.094608	-5.27099	1.35692e-07	2.03935e-06	ENSG00000183530.14_PRR14L	down	YES
60.7676	0.603565	0.114553	5.26889	1.37255e-07	2.06089e-06	ENSG00000136682.15_CBWD2	up	YES
316.179	-0.892458	0.16939	-5.26865	1.37429e-07	2.06157e-06	ENSG00000111726.13_CMAS	down	YES
64.1936	1.15893	0.220056	5.2665	1.39052e-07	2.08394e-06	ENSG00000164430.17_CGAS	up	YES
34.536	2.80382	0.532468	5.2657	1.39653e-07	2.09097e-06	ENSG00000204335.4_SP5	up	YES
15.9367	-1.67169	0.31748	-5.26552	1.39796e-07	2.09116e-06	ENSG00000007264.15_MATK	down	YES
143.214	1.33688	0.253914	5.26509	1.40124e-07	2.09409e-06	ENSG00000162073.14_PAQR4	up	YES
222.869	-0.851219	0.161719	-5.26358	1.41274e-07	2.10929e-06	ENSG00000047346.13_FAM214A	down	YES
526.549	-3.20304	0.608556	-5.26334	1.41465e-07	2.11016e-06	ENSG00000142959.5_BEST4	down	YES
143.96	1.30301	0.247617	5.26219	1.42352e-07	2.12141e-06	ENSG00000168758.11_SEMA4C	up	YES
457.087	-0.375999	0.0714712	-5.26085	1.43392e-07	2.13491e-06	ENSG00000100796.18_PPP4R3A	down	YES
580.315	2.3577	0.44834	5.25873	1.45055e-07	2.15764e-06	ENSG00000148346.12_LCN2	up	YES
166.411	1.84509	0.350977	5.25701	1.4642e-07	2.17591e-06	ENSG00000102359.9_SRPX2	up	YES
138.925	-0.529192	0.100668	-5.25682	1.46568e-07	2.17607e-06	ENSG00000163719.20_MTMR14	down	YES
926.442	0.75982	0.144631	5.25352	1.49219e-07	2.20923e-06	ENSG00000112159.12_MDN1	up	YES
403.651	0.488909	0.093066	5.25335	1.49357e-07	2.20923e-06	ENSG00000136938.9_ANP32B	up	YES
153.41	1.19988	0.228389	5.25369	1.49085e-07	2.20923e-06	ENSG00000160214.13_RRP1	up	YES
234.431	2.92005	0.55581	5.25368	1.49093e-07	2.20923e-06	ENSG00000213886.4_UBD	up	YES
39.7434	1.69071	0.32196	5.2513	1.5103e-07	2.23191e-06	ENSG00000149485.19_FADS1	up	YES
199.752	-1.19172	0.227044	-5.24886	1.53043e-07	2.25955e-06	ENSG00000111684.11_LPCAT3	down	YES
24.3858	-2.18452	0.416283	-5.24769	1.54021e-07	2.27189e-06	ENSG00000073734.10_ABCB11	down	YES
85.0403	1.38034	0.263088	5.2467	1.54849e-07	2.28198e-06	ENSG00000167695.15_TLCD3A	up	YES
20.5099	1.83952	0.350655	5.24595	1.55481e-07	2.28917e-06	ENSG00000184343.11_SRPK3	up	YES
294.242	-1.21996	0.232605	-5.24479	1.56462e-07	2.30148e-06	ENSG00000163293.12_NIPAL1	down	YES
351.232	-0.669498	0.127658	-5.24446	1.5674e-07	2.30345e-06	ENSG00000005812.11_FBXL3	down	YES
26.7871	1.57119	0.299643	5.24355	1.57516e-07	2.3127e-06	ENSG00000167105.8_TMEM92	up	YES
19.4711	1.66176	0.316969	5.24266	1.58278e-07	2.32175e-06	ENSG00000204618.10_RNF39	up	YES
87.2036	1.39839	0.266744	5.24244	1.58463e-07	2.32232e-06	ENSG00000059377.18_TBXAS1	up	YES
1723.9	-1.28194	0.244549	-5.24206	1.5879e-07	2.32498e-06	ENSG00000215193.14_PEX26	down	YES
261.737	-1.70909	0.326156	-5.24009	1.60495e-07	2.34777e-06	ENSG00000157111.13_TMEM171	down	YES
170.72	1.02924	0.196449	5.23924	1.61239e-07	2.35649e-06	ENSG00000156802.13_ATAD2	up	YES
175.394	-0.967562	0.184754	-5.23704	1.63175e-07	2.3826e-06	ENSG00000102362.15_SYTL4	down	YES
86.5243	0.665894	0.127161	5.23662	1.63541e-07	2.38574e-06	ENSG00000143374.17_TARS2	up	YES
161.74	-2.26244	0.432089	-5.23605	1.64047e-07	2.39093e-06	ENSG00000036672.16_USP2	down	YES
388.605	0.685102	0.130857	5.2355	1.64542e-07	2.39595e-06	ENSG00000147133.17_TAF1	up	YES
123.654	1.24306	0.237451	5.23502	1.64967e-07	2.39995e-06	ENSG00000188070.9_C11orf95	up	YES
376.949	0.645532	0.123357	5.23303	1.66755e-07	2.41978e-06	ENSG00000015676.18_NUDCD3	up	YES
35.2436	-2.38009	0.454824	-5.23299	1.66787e-07	2.41978e-06	ENSG00000154165.5_GPR15	down	YES
736.557	0.901618	0.172287	5.23323	1.66577e-07	2.41978e-06	ENSG00000198363.18_ASPH	up	YES
141.748	1.06446	0.203467	5.23161	1.68038e-07	2.4357e-06	ENSG00000138772.13_ANXA3	up	YES
461.582	-1.34893	0.25791	-5.23026	1.69272e-07	2.45137e-06	ENSG00000219481.10_NBPF1	down	YES
104.516	1.1142	0.213201	5.22608	1.73141e-07	2.50511e-06	ENSG00000136856.18_SLC2A8	up	YES
1403.22	-1.28191	0.245486	-5.22191	1.77089e-07	2.55726e-06	ENSG00000121900.19_TMEM54	down	YES
19.8233	0.99726	0.19098	5.2218	1.77196e-07	2.55726e-06	ENSG00000137404.15_NRM	up	YES
40.1041	1.56684	0.30006	5.22176	1.77228e-07	2.55726e-06	ENSG00000235831.7_BHLHE40-AS1	up	YES
580.358	1.23517	0.236562	5.22135	1.77622e-07	2.5583e-06	ENSG00000139514.13_SLC7A1	up	YES
40.8286	-0.929985	0.178108	-5.22146	1.77514e-07	2.5583e-06	ENSG00000270959.1_LPP-AS2	down	YES
580.952	-1.0058	0.192651	-5.22084	1.78111e-07	2.56303e-06	ENSG00000155846.17_PPARGC1B	down	YES
84.9189	0.920142	0.176255	5.22051	1.78431e-07	2.56531e-06	ENSG00000135632.12_SMYD5	up	YES
170.501	-1.20585	0.231025	-5.21959	1.79321e-07	2.57577e-06	ENSG00000114023.15_FAM162A	down	YES
994.367	-1.07306	0.205713	-5.21629	1.82542e-07	2.61778e-06	ENSG00000086062.13_B4GALT1	down	YES
39.681	-1.69627	0.32519	-5.21626	1.82574e-07	2.61778e-06	ENSG00000164330.17_EBF1	down	YES
297.407	1.42289	0.272849	5.21493	1.8389e-07	2.63427e-06	ENSG00000124920.14_MYRF	up	YES
83.2937	0.629703	0.120759	5.21456	1.84258e-07	2.63716e-06	ENSG00000138002.16_IFT172	up	YES
256.192	-0.632015	0.121242	-5.21283	1.85983e-07	2.65946e-06	ENSG00000081019.13_RSBN1	down	YES
19.7981	2.5642	0.492078	5.21097	1.87855e-07	2.68381e-06	ENSG00000183248.12_PRR36	up	YES
424.518	0.91574	0.175773	5.20977	1.89071e-07	2.69876e-06	ENSG00000130816.17_DNMT1	up	YES
15.398	2.17183	0.417133	5.20657	1.92361e-07	2.74326e-06	ENSG00000143847.15_PPFIA4	up	YES
638.366	-0.775902	0.149032	-5.20628	1.92664e-07	2.74512e-06	ENSG00000135940.7_COX5B	down	YES
31.4434	1.07324	0.206151	5.20607	1.92885e-07	2.7458e-06	ENSG00000170293.9_CMTM8	up	YES
78.6059	1.56934	0.301472	5.20558	1.93394e-07	2.75059e-06	ENSG00000165655.17_ZNF503	up	YES
477.941	-1.71864	0.330256	-5.20395	1.95093e-07	2.77228e-06	ENSG00000162817.7_C1orf115	down	YES
348.225	2.52747	0.485748	5.20326	1.95823e-07	2.78017e-06	ENSG00000041982.16_TNC	up	YES
3703.91	-1.90304	0.366137	-5.19762	2.01856e-07	2.86325e-06	ENSG00000166165.13_CKB	down	YES
815.441	-0.964276	0.18559	-5.19574	2.03905e-07	2.88717e-06	ENSG00000117676.14_RPS6KA1	down	YES
56.7007	0.938743	0.180673	5.19582	2.03822e-07	2.88717e-06	ENSG00000198208.12_RPS6KL1	up	YES
32.2455	-1.13332	0.218216	-5.1936	2.06271e-07	2.91808e-06	ENSG00000157833.13_GAREM2	down	YES
14.9209	-2.06029	0.396832	-5.19184	2.08227e-07	2.94312e-06	ENSG00000007312.13_CD79B	down	YES
245.148	0.885221	0.170519	5.19133	2.08802e-07	2.94864e-06	ENSG00000110841.14_PPFIBP1	up	YES
76.9509	0.634495	0.122248	5.19024	2.1002e-07	2.96321e-06	ENSG00000198707.17_CEP290	up	YES
632.404	1.18466	0.228263	5.18989	2.10415e-07	2.96352e-06	ENSG00000161996.19_WDR90	up	YES
70.8323	-1.01864	0.196272	-5.18997	2.10332e-07	2.96352e-06	ENSG00000163686.15_ABHD6	down	YES
1559.62	-1.00306	0.193312	-5.18882	2.11632e-07	2.97802e-06	ENSG00000277443.3_MARCKS	down	YES
124.106	-0.636593	0.122697	-5.18833	2.12192e-07	2.98326e-06	ENSG00000178694.10_NSUN3	down	YES
25.6326	2.61129	0.503396	5.18735	2.13305e-07	2.99625e-06	ENSG00000245694.10_CRNDE	up	YES
33.4211	1.71697	0.331024	5.18683	2.13909e-07	3.00208e-06	ENSG00000092445.12_TYRO3	up	YES
20.1037	-1.63893	0.315995	-5.18657	2.14204e-07	3.00358e-06	ENSG00000205683.12_DPF3	down	YES
606.658	0.720765	0.138992	5.18567	2.15236e-07	3.01539e-06	ENSG00000137693.14_YAP1	up	YES
113.223	0.76008	0.146619	5.18405	2.17121e-07	3.03912e-06	ENSG00000102030.16_NAA10	up	YES
363.556	-1.50223	0.28981	-5.18351	2.17751e-07	3.04525e-06	ENSG00000109265.15_CRACD	down	YES
847.239	-0.7232	0.139533	-5.18301	2.18335e-07	3.04806e-06	ENSG00000070610.14_GBA2	down	YES
2727.73	-0.913761	0.176295	-5.18315	2.18173e-07	3.04806e-06	ENSG00000110955.9_ATP5F1B	down	YES
275.651	-0.530294	0.102399	-5.17869	2.23451e-07	3.11401e-06	ENSG00000013288.9_MAN2B2	down	YES
613.401	-1.44251	0.278543	-5.17876	2.23365e-07	3.11401e-06	ENSG00000145703.16_IQGAP2	down	YES
7764.31	-0.85701	0.165518	-5.17774	2.24587e-07	3.12711e-06	ENSG00000167996.16_FTH1	down	YES
9677.19	-2.66667	0.515157	-5.17642	2.2618e-07	3.14288e-06	ENSG00000091138.13_SLC26A3	down	YES
690.485	0.913846	0.176544	5.17631	2.26313e-07	3.14288e-06	ENSG00000185650.10_ZFP36L1	up	YES
309.208	0.942903	0.182155	5.17638	2.26237e-07	3.14288e-06	ENSG00000215440.12_NPEPL1	up	YES
382.949	0.620554	0.119895	5.17581	2.26923e-07	3.1486e-06	ENSG00000137166.17_FOXP4	up	YES
220.736	-1.40455	0.271384	-5.1755	2.27296e-07	3.15103e-06	ENSG00000154153.15_RETREG1	down	YES
570.198	-0.920154	0.177892	-5.17254	2.30929e-07	3.19796e-06	ENSG00000095539.15_SEMA4G	down	YES
63.2025	2.25069	0.435133	5.17242	2.31083e-07	3.19796e-06	ENSG00000139211.7_AMIGO2	up	YES
252.851	1.23011	0.237989	5.16877	2.35638e-07	3.25816e-06	ENSG00000160949.17_TONSL	up	YES
36.5882	1.86104	0.360188	5.16687	2.38051e-07	3.28866e-06	ENSG00000141682.12_PMAIP1	up	YES
369.581	-0.830255	0.160751	-5.16486	2.40615e-07	3.3212e-06	ENSG00000140374.16_ETFA	down	YES
159.932	0.696851	0.134947	5.16387	2.41894e-07	3.33595e-06	ENSG00000134905.17_CARS2	up	YES
50.1219	1.27653	0.24723	5.16331	2.42627e-07	3.34316e-06	ENSG00000136048.14_DRAM1	up	YES
1097.27	0.740565	0.143472	5.16175	2.44658e-07	3.36823e-06	ENSG00000130726.12_TRIM28	up	YES
69.8952	1.49318	0.289303	5.16131	2.45229e-07	3.37317e-06	ENSG00000114251.15_WNT5A	up	YES
157.927	-1.35228	0.262023	-5.16092	2.45742e-07	3.3773e-06	ENSG00000088280.19_ASAP3	down	YES
260.048	-0.763025	0.147865	-5.16028	2.46576e-07	3.38585e-06	ENSG00000117118.10_SDHB	down	YES
20.5738	1.35138	0.261984	5.15825	2.4927e-07	3.41988e-06	ENSG00000182324.7_KCNJ14	up	YES
255.686	-0.828553	0.160633	-5.15803	2.49555e-07	3.42084e-06	ENSG00000177628.16_GBA	down	YES
78.4631	1.15263	0.223515	5.15684	2.51148e-07	3.43971e-06	ENSG00000104524.14_PYCR3	up	YES
128.036	0.68717	0.133296	5.15524	2.53309e-07	3.46632e-06	ENSG00000170448.12_NFXL1	up	YES
182.356	1.56688	0.303981	5.15454	2.54254e-07	3.47626e-06	ENSG00000011426.11_ANLN	up	YES
521.654	-1.90236	0.369111	-5.15391	2.55107e-07	3.48492e-06	ENSG00000160191.18_PDE9A	down	YES
25.584	1.25186	0.242966	5.15243	2.5713e-07	3.50955e-06	ENSG00000196284.17_SUPT3H	up	YES
201.971	-0.807801	0.156859	-5.14985	2.60691e-07	3.5551e-06	ENSG00000171492.14_LRRC8D	down	YES
22.8849	0.872281	0.169409	5.14896	2.61928e-07	3.56585e-06	ENSG00000143256.5_PFDN2	up	YES
131.324	1.34636	0.261479	5.14901	2.61861e-07	3.56585e-06	ENSG00000274070.2_CASTOR2	up	YES
1077.9	-0.656236	0.127516	-5.14629	2.65687e-07	3.61393e-06	ENSG00000164715.6_LMTK2	down	YES
161.446	1.90991	0.371182	5.1455	2.66815e-07	3.62618e-06	ENSG00000196923.14_PDLIM7	up	YES
108.092	-1.50829	0.293196	-5.14431	2.68499e-07	3.64595e-06	ENSG00000198121.14_LPAR1	down	YES
372.826	1.23056	0.239228	5.14387	2.69131e-07	3.65141e-06	ENSG00000124207.17_CSE1L	up	YES
194.609	0.713029	0.138623	5.14367	2.69422e-07	3.65224e-06	ENSG00000149657.20_LSM14B	up	YES
107	1.09534	0.212968	5.14321	2.70087e-07	3.65814e-06	ENSG00000137692.12_DCUN1D5	up	YES
20.0317	-1.31893	0.256566	-5.14073	2.73679e-07	3.70049e-06	ENSG00000101680.15_LAMA1	down	YES
50.9238	0.797162	0.155067	5.14075	2.73638e-07	3.70049e-06	ENSG00000127399.15_LRRC61	up	YES
78.9695	0.875489	0.170395	5.13798	2.77704e-07	3.75172e-06	ENSG00000130731.16_METTL26	up	YES
51.5402	-1.96911	0.383272	-5.13762	2.78234e-07	3.75569e-06	ENSG00000010319.7_SEMA3G	down	YES
201.114	1.16642	0.227112	5.13586	2.80858e-07	3.7879e-06	ENSG00000135749.19_PCNX2	up	YES
19.8791	-1.79383	0.349319	-5.13522	2.81818e-07	3.79762e-06	ENSG00000105251.11_SHD	down	YES
2081.86	-1.53916	0.300041	-5.12983	2.89999e-07	3.90455e-06	ENSG00000120756.13_PLS1	down	YES
272.938	0.834477	0.162699	5.12898	2.91321e-07	3.91903e-06	ENSG00000107816.17_LZTS2	up	YES
106.38	2.12024	0.413492	5.12764	2.93392e-07	3.94025e-06	ENSG00000101255.12_TRIB3	up	YES
1045.18	-0.841331	0.164078	-5.12764	2.93394e-07	3.94025e-06	ENSG00000165678.21_GHITM	down	YES
197.338	1.50537	0.293617	5.12697	2.94437e-07	3.95093e-06	ENSG00000103811.18_CTSH	up	YES
67.3594	2.02415	0.394851	5.12638	2.95373e-07	3.96014e-06	ENSG00000134824.14_FADS2	up	YES
127.51	0.732409	0.142893	5.12559	2.96602e-07	3.97327e-06	ENSG00000173113.7_TRMT112	up	YES
41.687	1.63264	0.318612	5.12423	2.98754e-07	3.99873e-06	ENSG00000101000.6_PROCR	up	YES
130.503	2.04671	0.399622	5.12161	3.02934e-07	4.04856e-06	ENSG00000017483.15_SLC38A5	up	YES
439.148	0.637496	0.124479	5.1213	3.03443e-07	4.04856e-06	ENSG00000186174.13_BCL9L	up	YES
58.1876	-2.49058	0.486322	-5.12126	3.03495e-07	4.04856e-06	ENSG00000186417.14_GLDN	down	YES
101.106	0.690737	0.134875	5.12133	3.03388e-07	4.04856e-06	ENSG00000196704.14_AMZ2	up	YES
467.387	1.19455	0.233299	5.12024	3.05143e-07	4.06712e-06	ENSG00000159216.19_RUNX1	up	YES
33.3101	1.41244	0.275896	5.11945	3.06422e-07	4.08075e-06	ENSG00000127585.12_FBXL16	up	YES
128.968	0.923254	0.180356	5.11906	3.07066e-07	4.08591e-06	ENSG00000177192.14_PUS1	up	YES
294.756	0.969354	0.189389	5.11833	3.08257e-07	4.09832e-06	ENSG00000123143.13_PKN1	up	YES
143.34	-1.21393	0.237206	-5.11761	3.09431e-07	4.11049e-06	ENSG00000167074.15_TEF	down	YES
147.196	0.802282	0.156774	5.11744	3.09705e-07	4.1107e-06	ENSG00000114739.14_ACVR2B	up	YES
900.12	-2.05624	0.401895	-5.11636	3.11493e-07	4.13098e-06	ENSG00000156966.7_B3GNT7	down	YES
65.0443	1.81657	0.355189	5.11438	3.14779e-07	4.17108e-06	ENSG00000277363.5_SRCIN1	up	YES
1044.27	-0.812907	0.15896	-5.11392	3.15544e-07	4.17774e-06	ENSG00000127914.19_AKAP9	down	YES
175.003	-1.14878	0.224677	-5.11302	3.17054e-07	4.19424e-06	ENSG00000075239.14_ACAT1	down	YES
14.0037	1.51119	0.295581	5.1126	3.17762e-07	4.20011e-06	ENSG00000276023.5_DUSP14	up	YES
36.558	0.847226	0.165752	5.11142	3.1974e-07	4.22274e-06	ENSG00000217930.8_PAM16	up	YES
143.051	0.585797	0.114621	5.11071	3.20953e-07	4.23524e-06	ENSG00000181915.5_ADO	up	YES
400.558	1.06562	0.208545	5.10978	3.22541e-07	4.25268e-06	ENSG00000126602.11_TRAP1	up	YES
16.6231	2.02554	0.396627	5.10692	3.2745e-07	4.31382e-06	ENSG00000099625.13_CBARP	up	YES
1098.08	-1.16736	0.228832	-5.1014	3.37154e-07	4.43798e-06	ENSG00000172115.9_CYCS	down	YES
2312.54	-1.27811	0.250561	-5.101	3.37862e-07	4.44362e-06	ENSG00000181885.18_CLDN7	down	YES
97.9104	0.66987	0.131381	5.09866	3.42058e-07	4.49509e-06	ENSG00000105556.12_MIER2	up	YES
350.823	-1.05566	0.207066	-5.09819	3.42908e-07	4.50254e-06	ENSG00000100092.24_SH3BP1	down	YES
558.237	-1.58951	0.311826	-5.09745	3.44264e-07	4.51662e-06	ENSG00000101049.17_SGK2	down	YES
448.768	0.86929	0.17059	5.0958	3.47271e-07	4.55231e-06	ENSG00000103249.18_CLCN7	up	YES
139.242	-1.85539	0.364167	-5.0949	3.48927e-07	4.57026e-06	ENSG00000211445.12_GPX3	down	YES
720.751	-1.583	0.31074	-5.09428	3.50067e-07	4.58124e-06	ENSG00000166920.13_C15orf48	down	YES
82.63	-1.8088	0.355074	-5.09413	3.50342e-07	4.58124e-06	ENSG00000196196.3_HRCT1	down	YES
769.358	-1.25108	0.245658	-5.09276	3.52879e-07	4.61063e-06	ENSG00000171992.13_SYNPO	down	YES
228.043	-1.21224	0.238054	-5.0923	3.53738e-07	4.61427e-06	ENSG00000167107.13_ACSF2	down	YES
29.2232	0.801381	0.157368	5.09242	3.53521e-07	4.61427e-06	ENSG00000173275.13_ZNF449	up	YES
382.867	-0.696924	0.136906	-5.09053	3.57073e-07	4.65194e-06	ENSG00000137216.19_TMEM63B	down	YES
135.31	0.937489	0.184172	5.09028	3.57537e-07	4.65194e-06	ENSG00000153443.13_UBALD1	up	YES
143.228	-0.593926	0.116675	-5.09044	3.57232e-07	4.65194e-06	ENSG00000170365.10_SMAD1	down	YES
115.904	1.83748	0.360988	5.09014	3.57796e-07	4.65194e-06	ENSG00000184489.13_PTP4A3	up	YES
18.6201	0.972355	0.191063	5.08919	3.59591e-07	4.67145e-06	ENSG00000102312.24_PORCN	up	YES
576.36	-0.803698	0.157931	-5.08892	3.60104e-07	4.6743e-06	ENSG00000101558.14_VAPA	down	YES
16.8638	1.17005	0.229981	5.08761	3.62612e-07	4.70301e-06	ENSG00000124613.9_ZNF391	up	YES
53.0089	-1.64731	0.323914	-5.08563	3.66416e-07	4.74847e-06	ENSG00000152763.17_DNAI4	down	YES
695.526	0.713097	0.140241	5.08481	3.67999e-07	4.76511e-06	ENSG00000179051.14_RCC2	up	YES
44.049	1.14431	0.225063	5.08442	3.68757e-07	4.77104e-06	ENSG00000177674.16_AGTRAP	up	YES
144.297	-1.11118	0.218563	-5.08404	3.69482e-07	4.77265e-06	ENSG00000011198.10_ABHD5	down	YES
131.945	0.612899	0.12055	5.08417	3.69236e-07	4.77265e-06	ENSG00000132792.19_CTNNBL1	up	YES
468.786	-0.991192	0.194974	-5.08371	3.70133e-07	4.77718e-06	ENSG00000168575.10_SLC20A2	down	YES
428.765	-1.24585	0.245083	-5.08338	3.70779e-07	4.78163e-06	ENSG00000188761.13_BCL2L15	down	YES
196.644	0.910479	0.179128	5.08284	3.71829e-07	4.79129e-06	ENSG00000111300.10_NAA25	up	YES
1604.74	0.757524	0.149082	5.08125	3.74966e-07	4.8278e-06	ENSG00000196498.13_NCOR2	up	YES
483.582	-1.32813	0.261441	-5.08004	3.77349e-07	4.85455e-06	ENSG00000135362.14_PRR5L	down	YES
190.619	0.854985	0.168311	5.07979	3.77848e-07	4.85704e-06	ENSG00000114993.17_RTKN	up	YES
442.814	0.85462	0.16831	5.07764	3.82146e-07	4.90436e-06	ENSG00000159840.16_ZYX	up	YES
268.64	-0.861189	0.169603	-5.07768	3.82065e-07	4.90436e-06	ENSG00000183826.18_BTBD9	down	YES
1103.47	0.511797	0.100822	5.07626	3.84936e-07	4.93618e-06	ENSG00000204469.13_PRRC2A	up	YES
289.722	0.789933	0.155651	5.07502	3.87455e-07	4.96449e-06	ENSG00000171490.13_RSL1D1	up	YES
190.212	-0.757445	0.149314	-5.07284	3.91931e-07	5.01779e-06	ENSG00000204308.8_RNF5	down	YES
563.131	0.845158	0.166619	5.07241	3.92806e-07	5.02494e-06	ENSG00000166508.18_MCM7	up	YES
191.898	1.4669	0.289207	5.07215	3.93337e-07	5.02769e-06	ENSG00000183010.17_PYCR1	up	YES
84.2576	0.963702	0.190055	5.07064	3.9649e-07	5.06392e-06	ENSG00000187840.5_EIF4EBP1	up	YES
19.5184	1.85013	0.365057	5.06805	4.01916e-07	5.12911e-06	ENSG00000287569.1_RP4-760C5.1	up	YES
101.268	-0.701172	0.138405	-5.0661	4.06048e-07	5.17769e-06	ENSG00000157379.14_DHRS1	down	YES
43.3646	-0.850993	0.168004	-5.06531	4.07737e-07	5.19184e-06	ENSG00000099330.9_OCEL1	down	YES
508.604	-0.981507	0.193772	-5.06527	4.07811e-07	5.19184e-06	ENSG00000117528.14_ABCD3	down	YES
483.601	0.581078	0.11481	5.0612	4.16621e-07	5.29976e-06	ENSG00000173473.11_SMARCC1	up	YES
422.998	-0.717267	0.141725	-5.06099	4.17087e-07	5.30143e-06	ENSG00000100485.12_SOS2	down	YES
323.065	0.606386	0.119821	5.06075	4.17614e-07	5.3039e-06	ENSG00000141568.21_FOXK2	up	YES
3218.65	-2.35935	0.46624	-5.06039	4.1841e-07	5.30977e-06	ENSG00000104267.10_CA2	down	YES
136.839	1.036	0.204867	5.05694	4.26037e-07	5.40224e-06	ENSG00000135763.10_URB2	up	YES
730.941	-0.604611	0.119617	-5.05456	4.31382e-07	5.46566e-06	ENSG00000174903.16_RAB1B	down	YES
15.4429	1.59738	0.316053	5.05417	4.32268e-07	5.47253e-06	ENSG00000204113.6_BMP2KL	up	YES
113.427	1.95243	0.386398	5.05291	4.35136e-07	5.50446e-06	ENSG00000120068.7_HOXB8	up	YES
113.686	1.05341	0.208514	5.05199	4.37238e-07	5.52664e-06	ENSG00000181026.15_AEN	up	YES
648.959	-1.92051	0.3802	-5.05132	4.38758e-07	5.54145e-06	ENSG00000147883.12_CDKN2B	down	YES
12.549	-1.99928	0.395874	-5.05029	4.41132e-07	5.56639e-06	ENSG00000047936.11_ROS1	down	YES
132.966	0.729676	0.144486	5.05016	4.41433e-07	5.56639e-06	ENSG00000221926.13_TRIM16	up	YES
20.9761	2.14379	0.424529	5.04981	4.42261e-07	5.57241e-06	ENSG00000146411.6_SLC2A12	up	YES
34.0996	-1.50239	0.297623	-5.04798	4.46511e-07	5.62151e-06	ENSG00000151632.17_AKR1C2	down	YES
1147.47	-1.27041	0.251895	-5.04341	4.57306e-07	5.75287e-06	ENSG00000166866.13_MYO1A	down	YES
165.656	-1.37682	0.27305	-5.04238	4.59782e-07	5.77944e-06	ENSG00000167705.12_RILP	down	YES
654.49	-1.05574	0.209401	-5.04174	4.61312e-07	5.7929e-06	ENSG00000113161.17_HMGCR	down	YES
104.341	-0.491129	0.0974148	-5.04163	4.61581e-07	5.7929e-06	ENSG00000166024.14_R3HCC1L	down	YES
740.495	-1.29178	0.256276	-5.04058	4.64112e-07	5.82007e-06	ENSG00000139567.13_ACVRL1	down	YES
13.8493	1.14472	0.227115	5.04028	4.64861e-07	5.82486e-06	ENSG00000286207.1_RP11-17G11.2	up	YES
20.7512	1.32497	0.262967	5.03856	4.69053e-07	5.86931e-06	ENSG00000103269.14_RHBDL1	up	YES
365.683	-0.763152	0.151463	-5.03852	4.69146e-07	5.86931e-06	ENSG00000176542.10_USF3	down	YES
410.997	-0.827888	0.164318	-5.03832	4.6963e-07	5.87075e-06	ENSG00000166411.14_IDH3A	down	YES
487.921	-1.45964	0.289733	-5.03789	4.70696e-07	5.87944e-06	ENSG00000164237.9_CMBL	down	YES
781.594	1.34244	0.266492	5.03743	4.71814e-07	5.88879e-06	ENSG00000072110.16_ACTN1	up	YES
474.609	1.27568	0.253269	5.03686	4.73243e-07	5.90198e-06	ENSG00000183856.11_IQGAP3	up	YES
212.862	-1.36207	0.270465	-5.03603	4.75298e-07	5.92297e-06	ENSG00000164099.3_PRSS12	down	YES
187.364	1.83199	0.363885	5.03454	4.79007e-07	5.96452e-06	ENSG00000101825.8_MXRA5	up	YES
226.185	-1.97298	0.392006	-5.03303	4.82781e-07	6.00681e-06	ENSG00000113303.12_BTNL8	down	YES
111.163	1.17462	0.233417	5.03231	4.84615e-07	6.02021e-06	ENSG00000130881.14_LRP3	up	YES
195.07	-0.846224	0.168155	-5.0324	4.84384e-07	6.02021e-06	ENSG00000178802.18_MPI	down	YES
145.706	-1.53449	0.304942	-5.03207	4.85222e-07	6.02304e-06	ENSG00000102886.15_GDPD3	down	YES
49.5883	-1.24517	0.247531	-5.03035	4.89588e-07	6.0725e-06	ENSG00000164296.7_TIGD6	down	YES
22.3873	1.41551	0.281608	5.02654	4.99419e-07	6.18961e-06	ENSG00000136982.6_DSCC1	up	YES
71.301	-2.33806	0.46524	-5.0255	5.02119e-07	6.21822e-06	ENSG00000115380.20_EFEMP1	down	YES
315.402	-0.491242	0.0977648	-5.02473	5.04131e-07	6.22869e-06	ENSG00000092203.15_TOX4	down	YES
77.8888	0.761344	0.151519	5.02473	5.04139e-07	6.22869e-06	ENSG00000164086.10_DUSP7	up	YES
209.105	-0.743795	0.148021	-5.02493	5.03624e-07	6.22869e-06	ENSG00000188786.10_MTF1	down	YES
310.871	0.778181	0.154878	5.02447	5.0483e-07	6.23237e-06	ENSG00000126457.22_PRMT1	up	YES
68.2176	1.48352	0.295284	5.02404	5.05966e-07	6.24156e-06	ENSG00000065923.10_SLC9A7	up	YES
36.166	1.21895	0.24264	5.0237	5.06842e-07	6.24751e-06	ENSG00000181191.12_PJA1	up	YES
47.7728	-0.836743	0.166576	-5.02318	5.08224e-07	6.25969e-06	ENSG00000100577.19_GSTZ1	down	YES
61.6362	0.72285	0.143918	5.02264	5.09659e-07	6.27251e-06	ENSG00000171425.10_ZNF581	up	YES
316.688	-2.02559	0.403571	-5.01917	5.18946e-07	6.3778e-06	ENSG00000086696.11_HSD17B2	down	YES
47.2458	0.977057	0.194666	5.01915	5.19016e-07	6.3778e-06	ENSG00000110844.14_PRPF40B	up	YES
144.036	-0.705091	0.140485	-5.01899	5.19445e-07	6.37814e-06	ENSG00000135953.11_MFSD9	down	YES
148.237	0.626041	0.124751	5.01831	5.21286e-07	6.39581e-06	ENSG00000275700.6_AATF	up	YES
365.309	-0.657284	0.130986	-5.01798	5.22178e-07	6.39688e-06	ENSG00000167323.12_STIM1	down	YES
140.498	1.87593	0.373834	5.01806	5.21947e-07	6.39688e-06	ENSG00000254290.1_RP11-150O12.3	up	YES
297.847	1.36819	0.272677	5.01761	5.23188e-07	6.40432e-06	ENSG00000160957.14_RECQL4	up	YES
140.758	0.699377	0.139402	5.01696	5.24948e-07	6.41599e-06	ENSG00000102595.20_UGGT2	up	YES
420.148	-0.981452	0.195626	-5.01698	5.24906e-07	6.41599e-06	ENSG00000110628.16_SLC22A18	down	YES
255.603	0.501471	0.0999984	5.01479	5.30919e-07	6.48185e-06	ENSG00000136861.18_CDK5RAP2	up	YES
630.273	-1.20244	0.239783	-5.0147	5.31152e-07	6.48185e-06	ENSG00000151150.22_ANK3	down	YES
2110	-1.85786	0.370552	-5.01376	5.33752e-07	6.50858e-06	ENSG00000173597.9_SULT1B1	down	YES
42.6687	-2.44328	0.487398	-5.0129	5.3615e-07	6.52781e-06	ENSG00000205038.12_PKHD1L1	down	YES
855.483	-1.97563	0.394105	-5.01295	5.36011e-07	6.52781e-06	ENSG00000233041.8_PHGR1	down	YES
286.36	-1.68175	0.335583	-5.01144	5.40252e-07	6.57272e-06	ENSG00000137872.17_SEMA6D	down	YES
326.958	-0.673723	0.134541	-5.00756	5.5124e-07	6.70128e-06	ENSG00000167461.12_RAB8A	down	YES
78.1937	-2.1067	0.420727	-5.00729	5.52008e-07	6.70548e-06	ENSG00000168060.16_NAALADL1	down	YES
84.948	0.811253	0.162024	5.00701	5.5283e-07	6.71034e-06	ENSG00000133315.12_MACROD1	up	YES
211.994	0.522508	0.104369	5.00637	5.54655e-07	6.72736e-06	ENSG00000105176.18_URI1	up	YES
16.2671	2.72786	0.544911	5.00606	5.55545e-07	6.73302e-06	ENSG00000133048.13_CHI3L1	up	YES
128.203	0.540622	0.108016	5.00502	5.58556e-07	6.76436e-06	ENSG00000120725.13_SIL1	up	YES
796.113	-0.588147	0.117516	-5.00485	5.59069e-07	6.76542e-06	ENSG00000159592.11_GPBP1L1	down	YES
1495.26	-2.26343	0.452353	-5.00368	5.62474e-07	6.80145e-06	ENSG00000163586.10_FABP1	down	YES
174.399	0.580104	0.115946	5.00322	5.63796e-07	6.81224e-06	ENSG00000181220.17_ZNF746	up	YES
90.7088	1.81154	0.362092	5.00298	5.64509e-07	6.81569e-06	ENSG00000163618.18_CADPS	up	YES
65.7587	0.729309	0.145897	4.99878	5.76944e-07	6.96054e-06	ENSG00000103042.9_SLC38A7	up	YES
117.485	0.882012	0.176484	4.9977	5.80193e-07	6.98913e-06	ENSG00000141076.18_UTP4	up	YES
280.82	-1.21273	0.242653	-4.99779	5.79919e-07	6.98913e-06	ENSG00000183508.5_TENT5C	down	YES
161.508	1.13183	0.226554	4.99586	5.85745e-07	7.05067e-06	ENSG00000167747.15_C19orf48	up	YES
124.755	1.27337	0.255024	4.99313	5.94078e-07	7.14557e-06	ENSG00000069424.15_KCNAB2	up	YES
359.207	-0.626444	0.125484	-4.99222	5.96881e-07	7.17385e-06	ENSG00000100075.10_SLC25A1	down	YES
154.287	-1.31899	0.264243	-4.99157	5.98906e-07	7.19275e-06	ENSG00000197594.14_ENPP1	down	YES
29.7617	-1.32287	0.26505	-4.99102	6.00609e-07	7.20777e-06	ENSG00000171291.9_ZNF439	down	YES
68.3207	0.892271	0.178805	4.99018	6.03225e-07	7.23369e-06	ENSG00000131788.16_PIAS3	up	YES
19.9522	1.68399	0.337487	4.9898	6.04423e-07	7.24261e-06	ENSG00000144395.18_CCDC150	up	YES
390.626	-1.4549	0.29163	-4.98884	6.07415e-07	7.27297e-06	ENSG00000160712.13_IL6R	down	YES
552.681	-1.05514	0.211506	-4.98867	6.07948e-07	7.27388e-06	ENSG00000103056.12_SMPD3	down	YES
779.043	0.522344	0.104739	4.98712	6.12873e-07	7.32729e-06	ENSG00000183495.14_EP400	up	YES
537.793	0.886854	0.177875	4.98581	6.17025e-07	7.37139e-06	ENSG00000141556.22_TBCD	up	YES
240.502	-0.818751	0.164258	-4.98453	6.21114e-07	7.41466e-06	ENSG00000147471.12_PLPBP	down	YES
40.703	1.92123	0.385489	4.98387	6.2325e-07	7.43458e-06	ENSG00000158859.10_ADAMTS4	up	YES
195.203	1.69164	0.339642	4.98066	6.33667e-07	7.54752e-06	ENSG00000144668.12_ITGA9	up	YES
100.886	0.737069	0.147985	4.98071	6.33516e-07	7.54752e-06	ENSG00000147996.17_CBWD5	up	YES
1386.38	-0.54945	0.110323	-4.98039	6.34575e-07	7.55268e-06	ENSG00000082641.16_NFE2L1	down	YES
115.851	0.453057	0.0909948	4.97893	6.39366e-07	7.604e-06	ENSG00000197024.9_ZNF398	up	YES
100.224	1.63406	0.328264	4.97787	6.42869e-07	7.63995e-06	ENSG00000006327.14_TNFRSF12A	up	YES
33.4049	1.07622	0.216211	4.97765	6.43602e-07	7.64295e-06	ENSG00000170191.5_NANP	up	YES
935.058	-0.87718	0.176264	-4.97652	6.47371e-07	7.67237e-06	ENSG00000101596.16_SMCHD1	down	YES
82.6422	0.619659	0.124513	4.97665	6.46936e-07	7.67237e-06	ENSG00000119401.11_TRIM32	up	YES
60.8921	-2.07348	0.416657	-4.97647	6.47527e-07	7.67237e-06	ENSG00000168309.18_FAM107A	down	YES
96.1619	0.65963	0.132566	4.97586	6.49574e-07	7.6909e-06	ENSG00000106246.18_PTCD1	up	YES
100.944	1.33413	0.268136	4.97556	6.50577e-07	7.69704e-06	ENSG00000196950.14_SLC39A10	up	YES
224.946	-0.623713	0.125379	-4.97462	6.53773e-07	7.72911e-06	ENSG00000125734.15_GPR108	down	YES
78.5189	2.53735	0.510128	4.97396	6.56003e-07	7.7497e-06	ENSG00000170835.17_CEL	up	YES
410.054	-0.6799	0.136801	-4.97	6.69522e-07	7.90354e-06	ENSG00000117143.13_UAP1	down	YES
1277.54	-0.613268	0.123426	-4.96873	6.73922e-07	7.94666e-06	ENSG00000122359.18_ANXA11	down	YES
67.3964	1.04567	0.210453	4.96866	6.74174e-07	7.94666e-06	ENSG00000142684.9_ZNF593	up	YES
97.8136	-1.7162	0.345427	-4.96833	6.75315e-07	7.95421e-06	ENSG00000178462.12_TUBAL3	down	YES
18.9041	-3.04776	0.613517	-4.96769	6.77537e-07	7.97448e-06	ENSG00000164530.15_PI16	down	YES
186.842	0.695162	0.13996	4.96685	6.80493e-07	8.00334e-06	ENSG00000105447.13_GRWD1	up	YES
1199.03	-1.74086	0.350526	-4.96642	6.8201e-07	8.01526e-06	ENSG00000099139.14_PCSK5	down	YES
523.776	-0.790263	0.159129	-4.96617	6.8288e-07	8.01878e-06	ENSG00000103966.11_EHD4	down	YES
146.41	3.15511	0.635337	4.96605	6.83319e-07	8.01878e-06	ENSG00000131203.13_IDO1	up	YES
230.618	1.28768	0.25931	4.96578	6.84272e-07	8.02405e-06	ENSG00000122034.17_GTF3A	up	YES
170.691	0.986494	0.198726	4.96409	6.90222e-07	8.08786e-06	ENSG00000033170.17_FUT8	up	YES
47.879	1.52521	0.307264	4.96383	6.91168e-07	8.09053e-06	ENSG00000140511.12_HAPLN3	up	YES
695.322	-1.31114	0.264143	-4.96374	6.91468e-07	8.09053e-06	ENSG00000164251.5_F2RL1	down	YES
15.8893	1.25941	0.253742	4.96334	6.92905e-07	8.10139e-06	ENSG00000154920.15_EME1	up	YES
177.538	0.874596	0.176235	4.96267	6.95319e-07	8.12363e-06	ENSG00000167721.11_TSR1	up	YES
209.254	-0.90216	0.181802	-4.96233	6.96534e-07	8.13186e-06	ENSG00000165389.7_SPTSSA	down	YES
117.703	1.35154	0.272385	4.96188	6.98138e-07	8.1446e-06	ENSG00000123131.13_PRDX4	up	YES
130.531	0.949645	0.1914	4.96158	6.99223e-07	8.15128e-06	ENSG00000198040.11_ZNF84	up	YES
170.788	0.6123	0.123412	4.96143	6.99758e-07	8.15154e-06	ENSG00000151176.8_PLBD2	up	YES
2411.12	1.38932	0.280078	4.96048	7.03185e-07	8.18547e-06	ENSG00000064651.14_SLC12A2	up	YES
72.7028	0.992787	0.200149	4.96024	7.04077e-07	8.18985e-06	ENSG00000114767.7_RRP9	up	YES
89.8581	1.30938	0.264044	4.95894	7.08792e-07	8.23867e-06	ENSG00000127564.17_PKMYT1	up	YES
254.722	0.747283	0.1507	4.95876	7.09454e-07	8.24034e-06	ENSG00000135372.9_NAT10	up	YES
253.207	-0.809674	0.163296	-4.95832	7.1104e-07	8.25274e-06	ENSG00000072415.10_MPP5	down	YES
48.5729	1.38033	0.278402	4.95807	7.11975e-07	8.25756e-06	ENSG00000111450.14_STX2	up	YES
133.223	1.12422	0.226775	4.95742	7.14366e-07	8.27213e-06	ENSG00000125885.13_MCM8	up	YES
109.563	0.68852	0.13889	4.9573	7.14792e-07	8.27213e-06	ENSG00000163900.11_TMEM41A	up	YES
176.916	0.927422	0.187076	4.95747	7.14162e-07	8.27213e-06	ENSG00000165661.17_QSOX2	up	YES
151.031	-0.662977	0.133751	-4.95682	7.16576e-07	8.28675e-06	ENSG00000138942.16_RNF185	down	YES
63.9961	0.926244	0.186876	4.95646	7.17882e-07	8.28979e-06	ENSG00000187838.17_PLSCR3	up	YES
15.4891	1.20297	0.242705	4.9565	7.17761e-07	8.28979e-06	ENSG00000262468.6_LINC01569	up	YES
197.521	0.80446	0.162316	4.95615	7.19042e-07	8.29716e-06	ENSG00000116062.17_MSH6	up	YES
1277.27	-1.14731	0.231513	-4.95571	7.20678e-07	8.31001e-06	ENSG00000124762.14_CDKN1A	down	YES
51.1689	1.18813	0.239817	4.95431	7.25871e-07	8.36382e-06	ENSG00000243406.6_MRPS31P5	up	YES
232.997	1.10208	0.222465	4.95397	7.27132e-07	8.37228e-06	ENSG00000162413.16_KLHL21	up	YES
860.624	-0.556851	0.112439	-4.95247	7.32783e-07	8.43125e-06	ENSG00000169926.11_KLF13	down	YES
1737.86	-1.52582	0.308172	-4.95119	7.37629e-07	8.48087e-06	ENSG00000002726.21_AOC1	down	YES
100.666	1.06257	0.214675	4.94969	7.43309e-07	8.54e-06	ENSG00000141577.14_CEP131	up	YES
551.894	-0.811046	0.163898	-4.94849	7.47922e-07	8.58679e-06	ENSG00000164506.14_STXBP5	down	YES
45.6217	-2.23592	0.451921	-4.94759	7.5139e-07	8.62039e-06	ENSG00000171126.8_KCNG3	down	YES
11.085	1.5826	0.319918	4.94688	7.54107e-07	8.64531e-06	ENSG00000169330.9_MINAR1	up	YES
688.854	-0.634789	0.128365	-4.9452	7.60643e-07	8.71397e-06	ENSG00000129353.15_SLC44A2	down	YES
132.925	0.895441	0.181112	4.94412	7.64875e-07	8.75614e-06	ENSG00000157593.19_SLC35B2	up	YES
102.12	0.585523	0.118432	4.94394	7.65592e-07	8.75804e-06	ENSG00000168495.13_POLR3D	up	YES
664.472	-1.38853	0.280989	-4.9416	7.74827e-07	8.85731e-06	ENSG00000184232.9_OAF	down	YES
167.938	-1.17513	0.237957	-4.93841	7.87605e-07	8.99692e-06	ENSG00000162407.9_PLPP3	down	YES
71.7805	0.942959	0.190973	4.93766	7.90645e-07	9.02516e-06	ENSG00000070718.12_AP3M2	up	YES
403.647	0.671896	0.136165	4.93442	8.03887e-07	9.16377e-06	ENSG00000131263.13_RLIM	up	YES
16.5616	1.33353	0.27025	4.93441	8.0394e-07	9.16377e-06	ENSG00000227199.1_ST7-AS1	up	YES
652.341	0.905949	0.183621	4.93379	8.06494e-07	9.18629e-06	ENSG00000124181.14_PLCG1	up	YES
1642.97	-0.760494	0.154184	-4.93237	8.12381e-07	9.24672e-06	ENSG00000171603.18_CLSTN1	down	YES
85.9249	0.763167	0.154875	4.92764	8.32284e-07	9.46649e-06	ENSG00000146416.19_AIG1	up	YES
39.4347	1.75709	0.356621	4.92705	8.34824e-07	9.48859e-06	ENSG00000183960.9_KCNH8	up	YES
448.878	-0.833099	0.169104	-4.92655	8.36939e-07	9.50584e-06	ENSG00000176845.13_METRNL	down	YES
482.399	-1.27798	0.259429	-4.92613	8.38736e-07	9.51944e-06	ENSG00000237289.10_CKMT1B	down	YES
2369.66	-0.935923	0.190015	-4.92553	8.4133e-07	9.54208e-06	ENSG00000005022.6_SLC25A5	down	YES
183.246	1.52623	0.309892	4.92505	8.43397e-07	9.55869e-06	ENSG00000162512.16_SDC3	up	YES
86.5457	-1.44369	0.293192	-4.92405	8.47725e-07	9.60091e-06	ENSG00000139117.14_CPNE8	down	YES
1387.69	-1.68173	0.341573	-4.9235	8.5011e-07	9.62106e-06	ENSG00000137628.18_DDX60	down	YES
37.0475	1.71273	0.348062	4.92075	8.62151e-07	9.74347e-06	ENSG00000176170.14_SPHK1	up	YES
314.921	-3.02121	0.613971	-4.92076	8.62079e-07	9.74347e-06	ENSG00000182271.13_TMIGD1	down	YES
40.609	0.941755	0.191401	4.92032	8.64026e-07	9.7508e-06	ENSG00000135622.13_SEMA4F	up	YES
68.6699	1.1575	0.235243	4.92045	8.6345e-07	9.7508e-06	ENSG00000167566.17_NCKAP5L	up	YES
36.1856	1.38573	0.281681	4.9195	8.67664e-07	9.78491e-06	ENSG00000117877.11_POLR1G	up	YES
2888.2	-1.60818	0.326923	-4.91914	8.69245e-07	9.7958e-06	ENSG00000099834.19_CDHR5	down	YES
44.8146	1.00116	0.203531	4.91894	8.70133e-07	9.79885e-06	ENSG00000146733.14_PSPH	up	YES
12.9241	1.76167	0.358169	4.91855	8.71891e-07	9.8117e-06	ENSG00000197472.15_ZNF695	up	YES
162.439	0.631251	0.128388	4.91673	8.8001e-07	9.89607e-06	ENSG00000090273.14_NUDC	up	YES
96.8975	-1.20026	0.244219	-4.91469	8.89231e-07	9.99269e-06	ENSG00000105851.11_PIK3CG	down	YES
53.3832	1.04767	0.213211	4.91379	8.93316e-07	1.00315e-05	ENSG00000101945.17_SUV39H1	up	YES
1272.99	-1.23479	0.251309	-4.91345	8.94873e-07	1.00419e-05	ENSG00000111319.13_SCNN1A	down	YES
220.037	-0.780804	0.15898	-4.91132	9.04647e-07	1.01444e-05	ENSG00000151327.13_FAM177A1	down	YES
74.475	0.678327	0.13814	4.91042	9.0883e-07	1.01841e-05	ENSG00000180822.12_PSMG4	up	YES
130.376	-0.932875	0.189985	-4.91027	9.0952e-07	1.01847e-05	ENSG00000100490.10_CDKL1	down	YES
34.5635	-2.12422	0.432703	-4.9092	9.14482e-07	1.02331e-05	ENSG00000243064.8_ABCC13	down	YES
647.627	-0.840011	0.171203	-4.90652	9.27053e-07	1.03664e-05	ENSG00000100647.8_SUSD6	down	YES
159.079	0.790469	0.161119	4.90613	9.28895e-07	1.03797e-05	ENSG00000012232.9_EXTL3	up	YES
395.492	-1.29514	0.26404	-4.9051	9.33778e-07	1.0427e-05	ENSG00000148584.15_A1CF	down	YES
7822.18	-2.56452	0.522861	-4.90479	9.35255e-07	1.04361e-05	ENSG00000007306.15_CEACAM7	down	YES
1378.58	-0.869967	0.177376	-4.90466	9.35906e-07	1.04361e-05	ENSG00000102804.15_TSC22D1	down	YES
69.9771	1.85425	0.378097	4.90417	9.38215e-07	1.04545e-05	ENSG00000135069.14_PSAT1	up	YES
157.536	1.20242	0.24523	4.90321	9.4283e-07	1.04986e-05	ENSG00000136108.15_CKAP2	up	YES
852.833	0.837049	0.17079	4.90104	9.53292e-07	1.06076e-05	ENSG00000197157.11_SND1	up	YES
220.62	-1.00583	0.205273	-4.89995	9.58605e-07	1.06593e-05	ENSG00000183475.13_ASB7	down	YES
2193.24	-1.7768	0.362723	-4.89849	9.65782e-07	1.07316e-05	ENSG00000250722.6_SELENOP	down	YES
493.783	-0.815838	0.166663	-4.89514	9.82372e-07	1.09013e-05	ENSG00000138029.14_HADHB	down	YES
2126.59	-1.26376	0.258166	-4.89513	9.82429e-07	1.09013e-05	ENSG00000204385.13_SLC44A4	down	YES
79.9829	-1.50496	0.307518	-4.89388	9.88648e-07	1.09627e-05	ENSG00000158825.6_CDA	down	YES
51.8555	1.43359	0.293053	4.89192	9.98546e-07	1.10647e-05	ENSG00000140937.14_CDH11	up	YES
747.601	-0.606394	0.123985	-4.89086	1.00398e-06	1.11172e-05	ENSG00000172725.14_CORO1B	down	YES
26.7882	-1.70012	0.347704	-4.88956	1.01061e-06	1.11828e-05	ENSG00000286035.1_RP11-429O22.1	down	YES
43.3045	2.36501	0.483837	4.88803	1.01848e-06	1.12621e-05	ENSG00000005001.10_PRSS22	up	YES
448.357	1.04596	0.214083	4.88576	1.03032e-06	1.13718e-05	ENSG00000061938.21_TNK2	up	YES
805.918	-1.01529	0.207798	-4.88594	1.02935e-06	1.13718e-05	ENSG00000067141.17_NEO1	down	YES
17.4659	1.88541	0.385903	4.88571	1.03055e-06	1.13718e-05	ENSG00000211448.13_DIO2	up	YES
684.553	-0.534533	0.109431	-4.88465	1.03611e-06	1.14173e-05	ENSG00000008130.15_NADK	down	YES
1023.85	-0.996681	0.204039	-4.88476	1.03555e-06	1.14173e-05	ENSG00000104880.19_ARHGEF18	down	YES
216.784	1.9043	0.389937	4.88362	1.04158e-06	1.14696e-05	ENSG00000009950.16_MLXIPL	up	YES
10.3023	1.4061	0.288091	4.88074	1.05687e-06	1.163e-05	ENSG00000286004.1_RP11-352G9.2	up	YES
30.0543	1.23691	0.253461	4.88006	1.06051e-06	1.1662e-05	ENSG00000103494.16_RPGRIP1L	up	YES
154.96	-2.31744	0.474913	-4.87972	1.06239e-06	1.16745e-05	ENSG00000186198.4_SLC51B	down	YES
21.7524	1.57686	0.323159	4.87952	1.06346e-06	1.16782e-05	ENSG00000050438.17_SLC4A8	up	YES
766.742	-0.387671	0.0794564	-4.87904	1.06606e-06	1.16987e-05	ENSG00000107862.6_GBF1	down	YES
143.717	-1.29749	0.265969	-4.87836	1.06974e-06	1.1731e-05	ENSG00000176438.13_SYNE3	down	YES
2092.28	-1.09126	0.223754	-4.87704	1.07688e-06	1.17849e-05	ENSG00000140391.15_TSPAN3	down	YES
18.9003	2.09303	0.429147	4.87717	1.07617e-06	1.17849e-05	ENSG00000155265.11_GOLGA7B	up	YES
32.9641	-2.11558	0.433773	-4.87716	1.07624e-06	1.17849e-05	ENSG00000232756.1_DDX3ILA1	down	YES
50.7215	-0.857851	0.175968	-4.87503	1.08789e-06	1.18972e-05	ENSG00000034533.12_ASTE1	down	YES
101.583	0.94055	0.192939	4.87485	1.08893e-06	1.19004e-05	ENSG00000133247.14_KMT5C	up	YES
326.323	-0.924308	0.189628	-4.87431	1.09187e-06	1.19243e-05	ENSG00000164938.14_TP53INP1	down	YES
47.2068	0.770167	0.158022	4.8738	1.09474e-06	1.19474e-05	ENSG00000237399.7_PITRM1-AS1	up	YES
431.871	-0.501051	0.10281	-4.87357	1.09597e-06	1.19527e-05	ENSG00000100330.16_MTMR3	down	YES
61.61	-1.55473	0.319025	-4.87339	1.09698e-06	1.19555e-05	ENSG00000137251.16_TINAG	down	YES
22.5431	1.333	0.273694	4.8704	1.11374e-06	1.21299e-05	ENSG00000179859.10_RNF227	up	YES
484.267	-0.787216	0.161672	-4.86922	1.12037e-06	1.21937e-05	ENSG00000135766.9_EGLN1	down	YES
171.408	0.999945	0.20539	4.86851	1.12443e-06	1.22296e-05	ENSG00000099810.21_MTAP	up	YES
61.8331	1.09331	0.224579	4.86826	1.12587e-06	1.22368e-05	ENSG00000072422.17_RHOBTB1	up	YES
132.019	0.806261	0.165623	4.86807	1.12696e-06	1.22403e-05	ENSG00000148120.18_AOPEP	up	YES
77.9436	1.57554	0.323681	4.86758	1.12972e-06	1.22535e-05	ENSG00000021300.14_PLEKHB1	up	YES
688.454	-0.815999	0.167639	-4.86758	1.1297e-06	1.22535e-05	ENSG00000138594.14_TMOD3	down	YES
359.847	1.57569	0.324085	4.86197	1.16223e-06	1.25975e-05	ENSG00000186193.9_SAPCD2	up	YES
653.73	0.961405	0.197751	4.86168	1.16391e-06	1.26072e-05	ENSG00000065150.21_IPO5	up	YES
279.822	-0.944191	0.194266	-4.86031	1.17203e-06	1.26865e-05	ENSG00000117758.14_STX12	down	YES
531.322	0.746055	0.153561	4.85835	1.18366e-06	1.28037e-05	ENSG00000139842.15_CUL4A	up	YES
206.915	-0.855784	0.176169	-4.85773	1.18736e-06	1.2835e-05	ENSG00000140848.17_CPNE2	down	YES
53.0558	1.05816	0.217859	4.85709	1.19124e-06	1.28682e-05	ENSG00000103351.13_CLUAP1	up	YES
31.3201	2.36519	0.486997	4.85668	1.19372e-06	1.28862e-05	ENSG00000114115.10_RBP1	up	YES
4270.34	0.584838	0.120436	4.856	1.19779e-06	1.29213e-05	ENSG00000187514.17_PTMA	up	YES
535.866	-1.2547	0.258404	-4.85556	1.20044e-06	1.29412e-05	ENSG00000178078.12_STAP2	down	YES
783.712	-0.9433	0.194355	-4.85349	1.21306e-06	1.30684e-05	ENSG00000151491.14_EPS8	down	YES
340.645	0.58057	0.119634	4.8529	1.21668e-06	1.30969e-05	ENSG00000138668.19_HNRNPD	up	YES
174.903	0.75287	0.155142	4.85279	1.21736e-06	1.30969e-05	ENSG00000163482.12_STK36	up	YES
113.318	0.990128	0.20405	4.85237	1.21994e-06	1.31158e-05	ENSG00000176124.15_DLEU1	up	YES
175.848	-1.05392	0.217268	-4.85079	1.22968e-06	1.32116e-05	ENSG00000130545.16_CRB3	down	YES
681.109	-0.534053	0.110101	-4.8506	1.23089e-06	1.32157e-05	ENSG00000024048.11_UBR2	down	YES
81.6658	1.27363	0.262581	4.85041	1.23205e-06	1.32192e-05	ENSG00000188677.15_PARVB	up	YES
136.832	0.562448	0.115966	4.85011	1.23394e-06	1.32305e-05	ENSG00000062598.18_ELMO2	up	YES
498.419	-1.18813	0.245006	-4.8494	1.23833e-06	1.32687e-05	ENSG00000112773.16_TENT5A	down	YES
2004.22	-1.27688	0.263321	-4.84916	1.23983e-06	1.32758e-05	ENSG00000160685.13_ZBTB7B	down	YES
462.337	0.463248	0.0955382	4.84882	1.24198e-06	1.32896e-05	ENSG00000119596.18_YLPM1	up	YES
2306.75	-1.76915	0.364873	-4.84869	1.24279e-06	1.32896e-05	ENSG00000176387.7_HSD11B2	down	YES
622.843	0.545822	0.112647	4.84544	1.26333e-06	1.35001e-05	ENSG00000196313.12_POM121	up	YES
85.4741	0.777023	0.160377	4.84499	1.26619e-06	1.35216e-05	ENSG00000172766.19_NAA16	up	YES
17.1742	1.35001	0.278675	4.84438	1.27009e-06	1.35542e-05	ENSG00000113248.6_PCDHB15	up	YES
27.8967	1.7879	0.369111	4.84381	1.27374e-06	1.35749e-05	ENSG00000115919.15_KYNU	up	YES
393.606	-0.454531	0.0938374	-4.84381	1.27373e-06	1.35749e-05	ENSG00000119689.15_DLST	down	YES
104.564	0.956362	0.197449	4.8436	1.27508e-06	1.35801e-05	ENSG00000080839.12_RBL1	up	YES
438.677	-0.851685	0.17592	-4.84133	1.2897e-06	1.37266e-05	ENSG00000169021.6_UQCRFS1	down	YES
606.103	1.40201	0.289613	4.84097	1.29205e-06	1.37424e-05	ENSG00000142102.16_PGGHG	up	YES
575.298	-0.455392	0.0940758	-4.8407	1.29385e-06	1.37524e-05	ENSG00000075711.21_DLG1	down	YES
71.1071	0.662318	0.136829	4.84046	1.29536e-06	1.37592e-05	ENSG00000137054.16_POLR1E	up	YES
1990.48	-0.839024	0.173357	-4.83987	1.29926e-06	1.37914e-05	ENSG00000197077.14_KIAA1671	down	YES
379.982	0.702237	0.145133	4.83857	1.30774e-06	1.38722e-05	ENSG00000155561.15_NUP205	up	YES
18.3378	1.65133	0.341413	4.83675	1.31977e-06	1.39905e-05	ENSG00000188372.15_ZP3	up	YES
604.625	-1.0045	0.207701	-4.83628	1.32293e-06	1.40146e-05	ENSG00000172340.15_SUCLG2	down	YES
448.453	-0.812623	0.16805	-4.83561	1.32741e-06	1.40527e-05	ENSG00000155158.20_TTC39B	down	YES
79.2188	1.38409	0.28628	4.83474	1.33322e-06	1.41048e-05	ENSG00000188158.16_NHS	up	YES
60.3263	1.00336	0.207543	4.83446	1.33506e-06	1.41149e-05	ENSG00000064102.15_INTS13	up	YES
651.465	-1.18514	0.245218	-4.83301	1.34481e-06	1.42086e-05	ENSG00000119514.7_GALNT12	down	YES
51.5703	1.67179	0.345987	4.83194	1.35207e-06	1.42663e-05	ENSG00000143590.14_EFNA3	up	YES
193.338	-1.22333	0.25317	-4.83205	1.35135e-06	1.42663e-05	ENSG00000163235.16_TGFA	down	YES
253.323	-1.53493	0.317698	-4.8314	1.35576e-06	1.42958e-05	ENSG00000116833.14_NR5A2	down	YES
281.018	0.557782	0.115454	4.83121	1.35709e-06	1.43003e-05	ENSG00000170265.12_ZNF282	up	YES
6682.84	-0.99042	0.205037	-4.83045	1.36226e-06	1.43453e-05	ENSG00000163399.16_ATP1A1	down	YES
102.362	1.2734	0.263743	4.82818	1.37786e-06	1.44999e-05	ENSG00000116857.17_TMEM9	up	YES
1006.8	-0.642052	0.132988	-4.82788	1.37993e-06	1.45121e-05	ENSG00000138760.11_SCARB2	down	YES
17.4169	1.67983	0.348025	4.82674	1.38788e-06	1.4586e-05	ENSG00000287839.1_RP11-29H23.8	up	YES
30.9733	0.789586	0.163597	4.82641	1.39018e-06	1.45991e-05	ENSG00000143224.18_PPOX	up	YES
756.885	-0.991424	0.205421	-4.8263	1.39096e-06	1.45991e-05	ENSG00000205352.11_PRR13	down	YES
228.947	-1.31911	0.273349	-4.82575	1.39478e-06	1.46295e-05	ENSG00000166510.14_CCDC68	down	YES
101.613	-2.06501	0.428065	-4.82405	1.40671e-06	1.47256e-05	ENSG00000130055.14_GDPD2	down	YES
191.529	0.660468	0.136905	4.82429	1.40506e-06	1.47256e-05	ENSG00000136877.15_FPGS	up	YES
51.6944	1.35581	0.281051	4.82405	1.40671e-06	1.47256e-05	ENSG00000285043.3_CTD-2515O10.6	up	YES
31.9905	2.06642	0.428385	4.82374	1.40892e-06	1.47389e-05	ENSG00000164764.11_SBSPON	up	YES
228.556	0.59715	0.123801	4.82345	1.41093e-06	1.47503e-05	ENSG00000104897.10_SF3A2	up	YES
95.1332	0.640311	0.132781	4.82231	1.41905e-06	1.48254e-05	ENSG00000162585.17_FAAP20	up	YES
12.4109	1.42198	0.295083	4.81893	1.44334e-06	1.50693e-05	ENSG00000261572.1_RP11-384L8.1	up	YES
195.512	0.930303	0.193066	4.81857	1.4459e-06	1.50862e-05	ENSG00000165684.5_SNAPC4	up	YES
482.039	-0.561465	0.116567	-4.81666	1.45978e-06	1.5221e-05	ENSG00000179091.5_CYC1	down	YES
67.1701	-1.29807	0.269669	-4.81355	1.48271e-06	1.54499e-05	ENSG00000178075.20_GRAMD1C	down	YES
344.727	0.799369	0.166102	4.81251	1.49048e-06	1.55207e-05	ENSG00000090861.17_AARS1	up	YES
116.656	0.835031	0.17363	4.80926	1.51489e-06	1.57646e-05	ENSG00000085185.16_BCORL1	up	YES
46.2605	0.885068	0.184071	4.80829	1.52225e-06	1.58212e-05	ENSG00000105185.12_PDCD5	up	YES
396.214	-0.480096	0.0998478	-4.80828	1.52233e-06	1.58212e-05	ENSG00000158864.13_NDUFS2	down	YES
36.0248	1.90255	0.395812	4.8067	1.53444e-06	1.59367e-05	ENSG00000205502.4_C2CD4B	up	YES
101.856	0.962591	0.200318	4.80532	1.54501e-06	1.60361e-05	ENSG00000221829.10_FANCG	up	YES
118.493	-0.778603	0.162057	-4.80451	1.55133e-06	1.60911e-05	ENSG00000145022.4_TCTA	down	YES
64.0002	0.630127	0.131158	4.80434	1.55263e-06	1.60941e-05	ENSG00000204348.10_DXO	up	YES
228.38	0.753653	0.156895	4.80356	1.5587e-06	1.61465e-05	ENSG00000105983.23_LMBR1	up	YES
286.276	-1.03186	0.214831	-4.80311	1.56218e-06	1.61721e-05	ENSG00000118640.11_VAMP8	down	YES
188.161	0.5024	0.104645	4.80098	1.57894e-06	1.63349e-05	ENSG00000148606.13_POLR3A	up	YES
176.929	1.60994	0.335464	4.79912	1.59361e-06	1.64652e-05	ENSG00000157110.16_RBPMS	up	YES
658.547	-1.05139	0.219074	-4.79925	1.59259e-06	1.64652e-05	ENSG00000189067.14_LITAF	down	YES
767.464	2.62866	0.547813	4.79847	1.59882e-06	1.65084e-05	ENSG00000185567.7_AHNAK2	up	YES
19.7698	1.47092	0.306636	4.79697	1.61086e-06	1.66219e-05	ENSG00000162493.17_PDPN	up	YES
1854.79	-0.785414	0.163743	-4.79664	1.61353e-06	1.66386e-05	ENSG00000075426.12_FOSL2	down	YES
55.4354	0.998404	0.208157	4.7964	1.61544e-06	1.66475e-05	ENSG00000147400.10_CETN2	up	YES
167.171	-1.38923	0.289797	-4.7938	1.63648e-06	1.68425e-05	ENSG00000073711.11_PPP2R3A	down	YES
18.4774	0.889141	0.185475	4.79387	1.63595e-06	1.68425e-05	ENSG00000133111.4_RFXAP	up	YES
203.139	0.873045	0.182155	4.79288	1.64406e-06	1.69096e-05	ENSG00000110108.10_TMEM109	up	YES
29.0026	-1.36424	0.284661	-4.79252	1.64697e-06	1.69286e-05	ENSG00000256663.1_RP11-424C20.2	down	YES
24.7807	1.23859	0.258487	4.79171	1.65368e-06	1.69865e-05	ENSG00000245910.8_SNHG6	up	YES
108.086	1.38737	0.289599	4.79066	1.66233e-06	1.70644e-05	ENSG00000182621.18_PLCB1	up	YES
381.039	-1.46489	0.305794	-4.79047	1.66393e-06	1.70697e-05	ENSG00000125845.7_BMP2	down	YES
62.9008	1.36945	0.285896	4.79001	1.66775e-06	1.70979e-05	ENSG00000143217.9_NECTIN4	up	YES
549.252	-1.02528	0.214057	-4.78978	1.66963e-06	1.71052e-05	ENSG00000108984.15_MAP2K6	down	YES
987.291	-1.04963	0.219146	-4.78966	1.67061e-06	1.71052e-05	ENSG00000198478.8_SH3BGRL2	down	YES
270.709	0.80858	0.168841	4.78901	1.67603e-06	1.71496e-05	ENSG00000178719.17_GRINA	up	YES
1523.73	-1.21815	0.254382	-4.78867	1.67892e-06	1.71681e-05	ENSG00000074416.15_MGLL	down	YES
149.43	-0.778721	0.162693	-4.78646	1.69752e-06	1.73472e-05	ENSG00000131871.15_SELENOS	down	YES
62.2291	0.644143	0.13459	4.78595	1.70178e-06	1.73796e-05	ENSG00000112130.17_RNF8	up	YES
507.846	-2.15617	0.45058	-4.78531	1.70727e-06	1.74245e-05	ENSG00000134321.13_RSAD2	down	YES
39.2143	1.3199	0.275925	4.78353	1.72242e-06	1.75678e-05	ENSG00000115657.14_ABCB6	up	YES
225.929	-0.854146	0.178603	-4.78238	1.73229e-06	1.76571e-05	ENSG00000141401.12_IMPA2	down	YES
1746.16	-0.997354	0.208577	-4.78171	1.73813e-06	1.77053e-05	ENSG00000167470.13_MIDN	down	YES
24.4567	1.76995	0.370269	4.78016	1.75158e-06	1.78195e-05	ENSG00000088002.12_SULT2B1	up	YES
667.454	-1.02799	0.215049	-4.78024	1.75084e-06	1.78195e-05	ENSG00000213977.8_TAX1BP3	down	YES
300.516	-0.878052	0.1837	-4.7798	1.75465e-06	1.78394e-05	ENSG00000130449.6_ZSWIM6	down	YES
530.134	-0.898828	0.188064	-4.77937	1.75844e-06	1.78664e-05	ENSG00000166900.17_STX3	down	YES
375.544	0.351983	0.0736528	4.77895	1.76217e-06	1.78815e-05	ENSG00000174243.10_DDX23	up	YES
793.862	-0.951487	0.199097	-4.77902	1.76154e-06	1.78815e-05	ENSG00000205213.14_LGR4	down	YES
452.107	1.15253	0.241212	4.77807	1.76988e-06	1.79483e-05	ENSG00000149639.15_SOGA1	up	YES
37.7503	1.06108	0.222126	4.77693	1.77994e-06	1.80388e-05	ENSG00000083635.8_NUFIP1	up	YES
735.093	0.615503	0.128877	4.7759	1.78902e-06	1.81077e-05	ENSG00000122515.15_ZMIZ2	up	YES
56.8138	-1.7199	0.360115	-4.77597	1.78845e-06	1.81077e-05	ENSG00000240498.9_CDKN2B-AS1	down	YES
278.838	-1.8448	0.386288	-4.77571	1.79074e-06	1.81136e-05	ENSG00000171227.7_TMEM37	down	YES
116.056	0.607652	0.127298	4.77347	1.81079e-06	1.83047e-05	ENSG00000167625.11_ZNF526	up	YES
308.28	1.75611	0.367934	4.77289	1.81597e-06	1.83454e-05	ENSG00000163975.12_MELTF	up	YES
663.135	-1.21214	0.254003	-4.77214	1.82276e-06	1.84023e-05	ENSG00000136059.15_VILL	down	YES
73.5728	1.03558	0.217033	4.77155	1.82816e-06	1.84101e-05	ENSG00000079462.8_PAFAH1B3	up	YES
14.5152	1.61165	0.337758	4.7716	1.82772e-06	1.84101e-05	ENSG00000113356.13_POLR3G	up	YES
59.5845	0.938011	0.196576	4.77176	1.82624e-06	1.84101e-05	ENSG00000157796.18_WDR19	up	YES
689.522	-0.852348	0.178631	-4.77156	1.82806e-06	1.84101e-05	ENSG00000166689.16_PLEKHA7	down	YES
29.6298	1.50568	0.315696	4.76938	1.84794e-06	1.85976e-05	ENSG00000171877.21_FRMD5	up	YES
15.5406	1.47922	0.3102	4.76861	1.85503e-06	1.86571e-05	ENSG00000227751.1_RCC2-AS1	up	YES
178.157	-1.23746	0.259512	-4.76842	1.85676e-06	1.86627e-05	ENSG00000155324.10_GRAMD2B	down	YES
147	-1.51818	0.318422	-4.76783	1.86223e-06	1.87058e-05	ENSG00000054277.14_OPN3	down	YES
663.009	-1.48987	0.312499	-4.76762	1.86419e-06	1.87136e-05	ENSG00000142875.19_PRKACB	down	YES
54.6151	-1.33071	0.279267	-4.76502	1.88838e-06	1.89375e-05	ENSG00000129595.14_EPB41L4A	down	YES
36.7906	1.39467	0.292693	4.76496	1.88887e-06	1.89375e-05	ENSG00000184903.10_IMMP2L	up	YES
188.236	0.818231	0.171743	4.76427	1.89542e-06	1.89913e-05	ENSG00000163811.12_WDR43	up	YES
391.971	-0.615001	0.129133	-4.76254	1.91171e-06	1.91423e-05	ENSG00000107521.20_HPS1	down	YES
181.073	0.835447	0.175521	4.75981	1.93779e-06	1.93859e-05	ENSG00000131873.7_CHSY1	up	YES
56.0932	0.819954	0.172269	4.75974	1.93847e-06	1.93859e-05	ENSG00000159714.12_ZDHHC1	up	YES
17.4566	0.850358	0.178704	4.75847	1.95062e-06	1.94952e-05	ENSG00000118420.17_UBE3D	up	YES
1177.91	0.854229	0.179615	4.75588	1.9758e-06	1.97344e-05	ENSG00000181163.14_NPM1	up	YES
26.0837	0.994996	0.209229	4.75553	1.97926e-06	1.97565e-05	ENSG00000166171.13_DPCD	up	YES
870.064	-0.943312	0.19845	-4.75339	2.00029e-06	1.9954e-05	ENSG00000137266.15_SLC22A23	down	YES
32.4511	-2.26595	0.476844	-4.75198	2.01439e-06	2.0082e-05	ENSG00000223573.7_TINCR	down	YES
621.655	-1.498	0.315247	-4.75182	2.0159e-06	2.00845e-05	ENSG00000185561.10_TLCD2	down	YES
2023.04	-0.844587	0.177751	-4.7515	2.0191e-06	2.01038e-05	ENSG00000138771.16_SHROOM3	down	YES
743.518	0.842708	0.177393	4.75052	2.02898e-06	2.01895e-05	ENSG00000152558.15_TMEM123	up	YES
49.05	0.716013	0.150788	4.74846	2.04969e-06	2.03828e-05	ENSG00000125846.16_ZNF133	up	YES
350.44	-0.431461	0.0908786	-4.74766	2.05783e-06	2.04509e-05	ENSG00000198815.9_FOXJ3	down	YES
513.017	-1.81507	0.38235	-4.74714	2.06311e-06	2.04778e-05	ENSG00000085563.15_ABCB1	down	YES
10.3271	1.46739	0.309104	4.74723	2.06224e-06	2.04778e-05	ENSG00000164932.13_CTHRC1	up	YES
716.22	-0.58261	0.122792	-4.74468	2.08838e-06	2.07158e-05	ENSG00000112893.10_MAN2A1	down	YES
89.6449	1.02276	0.21563	4.74315	2.10423e-06	2.08599e-05	ENSG00000177045.10_SIX5	up	YES
229.388	-0.926268	0.195297	-4.74287	2.10708e-06	2.08752e-05	ENSG00000119899.13_SLC17A5	down	YES
15.9077	1.15381	0.24329	4.74253	2.11069e-06	2.0898e-05	ENSG00000181544.15_FANCB	up	YES
795.304	0.700351	0.147686	4.74215	2.11464e-06	2.09241e-05	ENSG00000189091.13_SF3B3	up	YES
324.664	0.592574	0.124964	4.74197	2.11653e-06	2.09297e-05	ENSG00000139746.16_RBM26	up	YES
475.295	1.39524	0.294259	4.74152	2.12117e-06	2.09626e-05	ENSG00000170525.21_PFKFB3	up	YES
27.9726	1.55471	0.328019	4.73969	2.14049e-06	2.11404e-05	ENSG00000171017.11_LRRC8E	up	YES
322.51	0.482599	0.101851	4.73831	2.15511e-06	2.12451e-05	ENSG00000085872.15_CHERP	up	YES
1115.17	-0.773612	0.163266	-4.73834	2.15473e-06	2.12451e-05	ENSG00000266412.6_NCOA4	down	YES
32.4636	1.6785	0.354225	4.73852	2.1528e-06	2.12451e-05	ENSG00000272114.1_RP1-261G23.7	up	YES
31.7537	-1.49717	0.316017	-4.73762	2.16241e-06	2.13039e-05	ENSG00000271828.1_CTD-2310F14.1	down	YES
59.7704	0.666635	0.140725	4.73716	2.16738e-06	2.13397e-05	ENSG00000043514.17_TRIT1	up	YES
147.196	-0.655816	0.138449	-4.73687	2.17046e-06	2.13568e-05	ENSG00000114125.14_RNF7	down	YES
46.7591	1.09529	0.231236	4.73668	2.17251e-06	2.13637e-05	ENSG00000159259.8_CHAF1B	up	YES
417.167	0.728597	0.153958	4.73244	2.21842e-06	2.18017e-05	ENSG00000139641.13_ESYT1	up	YES
705.744	-0.734278	0.155164	-4.73226	2.22033e-06	2.18069e-05	ENSG00000096070.19_BRPF3	down	YES
178.973	1.81737	0.38407	4.73186	2.22474e-06	2.18368e-05	ENSG00000151067.23_CACNA1C	up	YES
582.538	0.939646	0.198613	4.73103	2.23383e-06	2.19125e-05	ENSG00000196305.19_IARS1	up	YES
226.714	0.81822	0.172965	4.73056	2.23898e-06	2.19494e-05	ENSG00000104907.13_TRMT1	up	YES
670.952	-1.60781	0.339932	-4.7298	2.24738e-06	2.20182e-05	ENSG00000167741.11_GGT6	down	YES
113.393	0.84332	0.178305	4.72964	2.24922e-06	2.20227e-05	ENSG00000123374.11_CDK2	up	YES
30.1093	2.45164	0.518377	4.72945	2.25124e-06	2.20289e-05	ENSG00000226476.6_LINC01748	up	YES
907.955	-1.14606	0.242343	-4.7291	2.2552e-06	2.20541e-05	ENSG00000168528.12_SERINC2	down	YES
457.978	-0.58707	0.124157	-4.72847	2.26221e-06	2.2109e-05	ENSG00000169641.13_LUZP1	down	YES
129.276	0.801913	0.169621	4.72766	2.27117e-06	2.21829e-05	ENSG00000178105.11_DDX10	up	YES
1021.48	0.769464	0.162838	4.72535	2.29724e-06	2.24238e-05	ENSG00000119335.17_SET	up	YES
572.113	0.821207	0.173835	4.72406	2.31182e-06	2.2525e-05	ENSG00000100401.20_RANGAP1	up	YES
790.098	1.03657	0.219419	4.72415	2.31074e-06	2.2525e-05	ENSG00000137309.20_HMGA1	up	YES
398.027	-0.979857	0.207419	-4.72406	2.31185e-06	2.2525e-05	ENSG00000164466.13_SFXN1	down	YES
152.048	0.972373	0.205963	4.72112	2.34555e-06	2.28393e-05	ENSG00000231721.7_LINC-PINT	up	YES
503.823	-1.40686	0.298104	-4.71935	2.36599e-06	2.30242e-05	ENSG00000114812.13_VIPR1	down	YES
365.248	-0.843803	0.178836	-4.71832	2.37805e-06	2.31162e-05	ENSG00000138796.18_HADH	down	YES
75.258	-1.42586	0.302197	-4.71829	2.37835e-06	2.31162e-05	ENSG00000158315.11_RHBDL2	down	YES
299.296	0.73088	0.154913	4.718	2.3818e-06	2.31215e-05	ENSG00000095319.14_NUP188	up	YES
162.293	1.59597	0.338267	4.71806	2.38099e-06	2.31215e-05	ENSG00000102287.19_GABRE	up	YES
291.181	1.01665	0.215495	4.71776	2.38459e-06	2.31345e-05	ENSG00000184575.12_XPOT	up	YES
518.617	1.02872	0.218079	4.71717	2.39149e-06	2.31872e-05	ENSG00000059588.10_TARBP1	up	YES
338.919	1.08504	0.230055	4.71646	2.39985e-06	2.32541e-05	ENSG00000132953.17_XPO4	up	YES
156.341	1.67216	0.354577	4.71594	2.40597e-06	2.32992e-05	ENSG00000204291.11_COL15A1	up	YES
123.405	-0.596197	0.126455	-4.7147	2.42068e-06	2.34132e-05	ENSG00000002330.14_BAD	down	YES
145.194	-1.15075	0.244071	-4.7148	2.41947e-06	2.34132e-05	ENSG00000150782.12_IL18	down	YES
421.734	-0.942434	0.199952	-4.7133	2.43734e-06	2.35599e-05	ENSG00000003400.15_CASP10	down	YES
246.301	-0.637729	0.135317	-4.71284	2.44292e-06	2.35996e-05	ENSG00000166908.18_PIP4K2C	down	YES
1106.51	-1.19768	0.254142	-4.71265	2.44517e-06	2.36069e-05	ENSG00000162458.13_FBLIM1	down	YES
86.8955	0.788238	0.167315	4.7111	2.46381e-06	2.37724e-05	ENSG00000130713.16_EXOSC2	up	YES
40.2623	-1.69501	0.359808	-4.71086	2.46676e-06	2.37865e-05	ENSG00000164270.18_HTR4	down	YES
498.211	1.41642	0.300736	4.70984	2.47906e-06	2.38906e-05	ENSG00000182580.3_EPHB3	up	YES
437.521	-0.869759	0.184684	-4.70945	2.48382e-06	2.3922e-05	ENSG00000112033.14_PPARD	down	YES
2604.22	-0.854136	0.181377	-4.70917	2.48722e-06	2.39378e-05	ENSG00000013364.19_MVP	down	YES
198.645	1.87377	0.397906	4.70907	2.48847e-06	2.39378e-05	ENSG00000057019.16_DCBLD2	up	YES
44.1712	1.12078	0.238028	4.70859	2.49438e-06	2.39801e-05	ENSG00000037042.9_TUBG2	up	YES
1791.94	-0.824588	0.175149	-4.70793	2.50242e-06	2.40429e-05	ENSG00000152234.16_ATP5F1A	down	YES
46.5695	1.46913	0.312129	4.7068	2.51639e-06	2.41625e-05	ENSG00000262528.2_LA16c-349E10.1	up	YES
66.8036	1.41669	0.301054	4.70576	2.52928e-06	2.42716e-05	ENSG00000186603.7_HPDL	up	YES
26.076	1.37591	0.292398	4.70561	2.53107e-06	2.42741e-05	ENSG00000188760.11_TMEM198	up	YES
56.8605	1.23552	0.262581	4.70529	2.53509e-06	2.42981e-05	ENSG00000065328.17_MCM10	up	YES
203.473	-0.897434	0.190758	-4.70456	2.54409e-06	2.43696e-05	ENSG00000171522.6_PTGER4	down	YES
3827.37	-1.21865	0.259066	-4.70401	2.55095e-06	2.44027e-05	ENSG00000176658.17_MYO1D	down	YES
388.872	-1.10969	0.235908	-4.70392	2.55215e-06	2.44027e-05	ENSG00000186204.15_CYP4F12	down	YES
53.9677	1.38585	0.294609	4.70404	2.55065e-06	2.44027e-05	ENSG00000279569.1_RP11-394B2.1	up	YES
73.2568	2.46905	0.52493	4.70358	2.55644e-06	2.44291e-05	ENSG00000154451.14_GBP5	up	YES
62.7165	0.787619	0.167507	4.702	2.57631e-06	2.45894e-05	ENSG00000171453.20_POLR1C	up	YES
7.75072	1.45264	0.30894	4.70203	2.57587e-06	2.45894e-05	ENSG00000197696.10_NMB	up	YES
301.701	0.482319	0.102587	4.70157	2.58172e-06	2.46262e-05	ENSG00000011451.21_WIZ	up	YES
126.771	0.74865	0.15926	4.70081	2.59137e-06	2.47035e-05	ENSG00000169062.15_UPF3A	up	YES
46.4969	1.08401	0.230623	4.70035	2.59718e-06	2.4744e-05	ENSG00000281571.2_CH17-195P21.2	up	YES
40.376	2.13466	0.454164	4.70019	2.59919e-06	2.47483e-05	ENSG00000092758.18_COL9A3	up	YES
32.05	-2.23949	0.476484	-4.70003	2.60125e-06	2.47531e-05	ENSG00000138356.14_AOX1	down	YES
288.504	-1.04983	0.223399	-4.69937	2.60971e-06	2.48187e-05	ENSG00000163541.12_SUCLG1	down	YES
148.497	1.23395	0.262604	4.69888	2.61588e-06	2.48626e-05	ENSG00000140534.14_TICRR	up	YES
245.706	-0.98887	0.210507	-4.69757	2.63275e-06	2.5008e-05	ENSG00000107738.20_VSIR	down	YES
24.7419	1.51434	0.322425	4.69671	2.64387e-06	2.50929e-05	ENSG00000115255.12_REEP6	up	YES
253.294	-1.09976	0.23416	-4.69663	2.64485e-06	2.50929e-05	ENSG00000172375.14_C2CD2L	down	YES
278.397	1.20215	0.256018	4.69558	2.65855e-06	2.52078e-05	ENSG00000122966.17_CIT	up	YES
445.817	1.0416	0.221895	4.69411	2.67768e-06	2.53741e-05	ENSG00000165732.13_DDX21	up	YES
304.113	1.44175	0.307215	4.69295	2.69295e-06	2.55036e-05	ENSG00000204839.9_MROH6	up	YES
483.665	0.546396	0.116506	4.68985	2.73409e-06	2.58779e-05	ENSG00000087087.20_SRRT	up	YES
487.31	-1.36583	0.291363	-4.68775	2.76232e-06	2.61139e-05	ENSG00000119227.8_PIGZ	down	YES
341.382	0.58322	0.124413	4.68777	2.76194e-06	2.61139e-05	ENSG00000188976.11_NOC2L	up	YES
38.6962	-1.17375	0.250492	-4.68577	2.78906e-06	2.63511e-05	ENSG00000275234.1_CTD-2396E7.11	down	YES
442.46	-0.702512	0.149933	-4.68551	2.79269e-06	2.63541e-05	ENSG00000154447.15_SH3RF1	down	YES
165.448	0.707496	0.150993	4.68562	2.79119e-06	2.63541e-05	ENSG00000170632.14_ARMC10	up	YES
111.097	1.09523	0.233765	4.68519	2.79706e-06	2.63797e-05	ENSG00000197182.14_MIRLET7BHG	up	YES
80.3984	0.52784	0.112668	4.68492	2.80069e-06	2.63982e-05	ENSG00000143862.8_ARL8A	up	YES
211.363	-1.5511	0.331168	-4.68372	2.81716e-06	2.65303e-05	ENSG00000137825.11_ITPKA	down	YES
183.028	-1.20337	0.256936	-4.68353	2.81971e-06	2.65303e-05	ENSG00000196517.13_SLC6A9	down	YES
869.724	0.974542	0.208078	4.68355	2.81955e-06	2.65303e-05	ENSG00000269821.1_KCNQ1OT1	up	YES
15.4657	-1.19573	0.255343	-4.68284	2.82923e-06	2.66041e-05	ENSG00000171174.15_RBKS	down	YES
267.6	0.755869	0.16142	4.68263	2.83218e-06	2.66161e-05	ENSG00000062822.15_POLD1	up	YES
99.6175	-1.12142	0.239566	-4.68107	2.85388e-06	2.68042e-05	ENSG00000172086.9_KRCC1	down	YES
2101.1	0.73647	0.157347	4.68054	2.86114e-06	2.68566e-05	ENSG00000137818.12_RPLP1	up	YES
101.32	0.960517	0.205223	4.68035	2.86384e-06	2.68661e-05	ENSG00000225663.8_MCRIP1	up	YES
287.807	-0.845762	0.180723	-4.67989	2.87027e-06	2.69104e-05	ENSG00000148154.10_UGCG	down	YES
220.963	0.94078	0.201081	4.6786	2.88837e-06	2.70642e-05	ENSG00000105855.10_ITGB8	up	YES
104.288	2.12837	0.45502	4.67753	2.90346e-06	2.71896e-05	ENSG00000059804.16_SLC2A3	up	YES
891.124	-0.745119	0.159327	-4.67665	2.91599e-06	2.72813e-05	ENSG00000051009.11_FAM160A2	down	YES
84.7419	1.11592	0.238619	4.67659	2.91684e-06	2.72813e-05	ENSG00000130304.17_SLC27A1	up	YES
11.1472	1.00593	0.215104	4.67648	2.9184e-06	2.72813e-05	ENSG00000135436.8_FAM186B	up	YES
815.108	1.63028	0.348744	4.67472	2.94349e-06	2.74663e-05	ENSG00000099194.6_SCD	up	YES
849.881	-0.711974	0.152307	-4.67461	2.9451e-06	2.74663e-05	ENSG00000156052.11_GNAQ	down	YES
22.3196	1.40453	0.300452	4.67472	2.94352e-06	2.74663e-05	ENSG00000167968.13_DNASE1L2	up	YES
79.8923	-1.5675	0.335318	-4.67467	2.94432e-06	2.74663e-05	ENSG00000225335.3_XXbac-B476C20.9	down	YES
68.8491	0.827926	0.177135	4.67399	2.95401e-06	2.75332e-05	ENSG00000174010.9_KLHL15	up	YES
131.812	1.27804	0.273461	4.67356	2.96019e-06	2.75747e-05	ENSG00000185201.17_IFITM2	up	YES
103.174	-0.586875	0.125621	-4.67177	2.98612e-06	2.78e-05	ENSG00000125449.7_ARMC7	down	YES
10.8651	-1.23697	0.264793	-4.67144	2.99091e-06	2.78282e-05	ENSG00000272264.1_RP11-92K15.3	down	YES
206.034	-0.849567	0.181952	-4.66919	3.02391e-06	2.81188e-05	ENSG00000182919.15_C11orf54	down	YES
2251.46	-0.759761	0.162734	-4.66872	3.03081e-06	2.81665e-05	ENSG00000079805.19_DNM2	down	YES
308.588	-0.509749	0.109198	-4.6681	3.03991e-06	2.82346e-05	ENSG00000176087.16_SLC35A4	down	YES
159.814	1.66658	0.357157	4.66624	3.06758e-06	2.84749e-05	ENSG00000148735.15_PLEKHS1	up	YES
21.7078	-1.95257	0.418546	-4.66512	3.08441e-06	2.86145e-05	ENSG00000256879.1_RP11-284H19.1	down	YES
39.7747	-0.814649	0.174662	-4.66415	3.09895e-06	2.87326e-05	ENSG00000135617.4_PRADC1	down	YES
20.2472	1.43007	0.306623	4.66394	3.10208e-06	2.87449e-05	ENSG00000176678.6_FOXL1	up	YES
236.606	-2.00161	0.429188	-4.66372	3.10537e-06	2.87586e-05	ENSG00000135220.11_UGT2A3	down	YES
359.787	0.854036	0.183136	4.66339	3.11043e-06	2.87887e-05	ENSG00000112118.20_MCM3	up	YES
52.203	0.807899	0.173268	4.66271	3.12075e-06	2.88674e-05	ENSG00000142528.16_ZNF473	up	YES
1075.13	-0.723044	0.155082	-4.66234	3.12627e-06	2.88898e-05	ENSG00000134243.12_SORT1	down	YES
96.8853	-0.370403	0.0794463	-4.66231	3.1268e-06	2.88898e-05	ENSG00000162300.13_ZFPL1	down	YES
753.328	-0.789918	0.169458	-4.66144	3.13999e-06	2.89779e-05	ENSG00000151693.11_ASAP2	down	YES
638.886	-0.475199	0.10194	-4.66155	3.13836e-06	2.89779e-05	ENSG00000182149.21_IST1	down	YES
625.521	-0.852629	0.182922	-4.66115	3.14441e-06	2.90019e-05	ENSG00000126107.15_HECTD3	down	YES
222.431	-0.71383	0.153219	-4.65888	3.17931e-06	2.93068e-05	ENSG00000175895.4_PLEKHF2	down	YES
36.0699	0.995383	0.213686	4.65815	3.19059e-06	2.93938e-05	ENSG00000132661.4_NXT1	up	YES
137.845	1.1763	0.252547	4.65776	3.19671e-06	2.94331e-05	ENSG00000171368.12_TPPP	up	YES
130.083	1.02529	0.220196	4.65625	3.22027e-06	2.96328e-05	ENSG00000135111.16_TBX3	up	YES
191.185	-0.678375	0.145776	-4.65356	3.26258e-06	3.00047e-05	ENSG00000187736.13_NHEJ1	down	YES
36.0565	-2.66857	0.573558	-4.65266	3.27677e-06	3.01179e-05	ENSG00000254645.2_RP11-396O20.2	down	YES
51.8156	0.88011	0.189208	4.65154	3.29458e-06	3.02641e-05	ENSG00000213397.12_HAUS7	up	YES
211.957	0.811038	0.174382	4.65094	3.30424e-06	3.03178e-05	ENSG00000093010.15_COMT	up	YES
25.1732	0.913794	0.196472	4.65102	3.30302e-06	3.03178e-05	ENSG00000243477.6_NAA80	up	YES
50.8764	1.34739	0.289741	4.65032	3.31417e-06	3.03914e-05	ENSG00000165480.16_SKA3	up	YES
427.721	-0.697665	0.150038	-4.64992	3.32065e-06	3.04332e-05	ENSG00000170871.12_KIAA0232	down	YES
204.629	0.629203	0.13532	4.64973	3.32376e-06	3.04442e-05	ENSG00000177830.18_CHID1	up	YES
282.092	0.467869	0.100646	4.64864	3.34124e-06	3.05811e-05	ENSG00000130811.12_EIF3G	up	YES
15150.4	-1.08387	0.233161	-4.64856	3.34255e-06	3.05811e-05	ENSG00000170421.12_KRT8	down	YES
148.368	0.842629	0.181283	4.64815	3.3493e-06	3.06252e-05	ENSG00000125247.16_TMTC4	up	YES
917.468	-0.539647	0.116123	-4.64719	3.36488e-06	3.075e-05	ENSG00000150760.13_DOCK1	down	YES
79.0013	0.972804	0.209397	4.64574	3.38865e-06	3.09494e-05	ENSG00000170779.11_CDCA4	up	YES
62.8444	-1.28555	0.27676	-4.645	3.40071e-06	3.10417e-05	ENSG00000279693.1_RP11-71L14.3	down	YES
1189.1	-0.867614	0.186816	-4.64421	3.41378e-06	3.11431e-05	ENSG00000116133.13_DHCR24	down	YES
627.03	-0.902975	0.19444	-4.64397	3.41776e-06	3.11536e-05	ENSG00000158985.14_CDC42SE2	down	YES
328.417	-0.910429	0.196048	-4.64391	3.41885e-06	3.11536e-05	ENSG00000186314.12_PRELID2	down	YES
13.2744	1.47925	0.318767	4.64055	3.4748e-06	3.16454e-05	ENSG00000255737.2_AGAP2-AS1	up	YES
1011.32	-2.694	0.580572	-4.64024	3.47998e-06	3.16669e-05	ENSG00000071203.9_MS4A12	down	YES
90.6442	0.956261	0.206083	4.64017	3.48115e-06	3.16669e-05	ENSG00000081059.20_TCF7	up	YES
113.397	0.558416	0.120372	4.63907	3.49981e-06	3.18185e-05	ENSG00000143811.19_PYCR2	up	YES
350.85	0.608733	0.131235	4.63849	3.50967e-06	3.18898e-05	ENSG00000144283.22_PKP4	up	YES
204.116	-1.4251	0.307247	-4.63829	3.513e-06	3.19019e-05	ENSG00000241360.2_PDXP	down	YES
96.0114	-1.75846	0.379186	-4.63747	3.527e-06	3.20107e-05	ENSG00000171916.17_LGALS9C	down	YES
19.6776	-1.37609	0.296787	-4.63664	3.54117e-06	3.2121e-05	ENSG00000170482.17_SLC23A1	down	YES
19.8182	1.37792	0.297324	4.63441	3.57952e-06	3.24319e-05	ENSG00000090971.5_NAT14	up	YES
331.263	-0.864986	0.186641	-4.6345	3.57809e-06	3.24319e-05	ENSG00000137414.6_FAM8A1	down	YES
34.9712	1.28728	0.277842	4.63313	3.60171e-06	3.26144e-05	ENSG00000263590.2_LINC02591	up	YES
505.89	-2.11447	0.456501	-4.6319	3.62317e-06	3.279e-05	ENSG00000198074.10_AKR1B10	down	YES
52.9501	0.748419	0.161611	4.631	3.63897e-06	3.29142e-05	ENSG00000272933.1_RP11-47A8.5	up	YES
252.256	0.867077	0.187245	4.6307	3.64424e-06	3.29432e-05	ENSG00000125520.14_SLC2A4RG	up	YES
68.0457	0.770863	0.166497	4.62989	3.65867e-06	3.30361e-05	ENSG00000133316.16_WDR74	up	YES
210.358	1.02312	0.220976	4.63	3.65666e-06	3.30361e-05	ENSG00000196497.17_IPO4	up	YES
655.294	1.15683	0.249872	4.62968	3.66231e-06	3.30502e-05	ENSG00000110651.12_CD81	up	YES
681.067	0.664016	0.143488	4.62767	3.69808e-06	3.3354e-05	ENSG00000151208.17_DLG5	up	YES
147.117	0.804578	0.173895	4.62681	3.71344e-06	3.34736e-05	ENSG00000198131.14_ZNF544	up	YES
33.7728	-0.917539	0.198322	-4.62651	3.71876e-06	3.35025e-05	ENSG00000226742.4_HSBP1L1	down	YES
14.2218	1.5433	0.333589	4.62637	3.72135e-06	3.35069e-05	ENSG00000131019.11_ULBP3	up	YES
322.16	-0.661463	0.143026	-4.62479	3.74986e-06	3.37445e-05	ENSG00000165406.16_MARCHF8	down	YES
40.9986	0.993959	0.215019	4.62266	3.78857e-06	3.40736e-05	ENSG00000112029.10_FBXO5	up	YES
359.667	-1.09368	0.23663	-4.62188	3.80286e-06	3.41828e-05	ENSG00000010438.17_PRSS3	down	YES
69.0589	-0.828205	0.179206	-4.62154	3.8091e-06	3.42195e-05	ENSG00000162927.14_PUS10	down	YES
146.388	1.22088	0.264209	4.62088	3.82107e-06	3.43077e-05	ENSG00000185989.11_RASA3	up	YES
117.498	-1.03285	0.223547	-4.62026	3.83256e-06	3.43914e-05	ENSG00000235863.4_B3GALT4	down	YES
107.464	-1.18856	0.257258	-4.62011	3.83531e-06	3.43966e-05	ENSG00000107537.14_PHYH	down	YES
110.103	-0.99881	0.216194	-4.61998	3.83778e-06	3.43994e-05	ENSG00000140471.17_LINS1	down	YES
330.816	0.610342	0.132115	4.61978	3.84156e-06	3.44139e-05	ENSG00000100941.9_PNN	up	YES
25.127	1.32901	0.287737	4.61885	3.85866e-06	3.45476e-05	ENSG00000235568.7_NFAM1	up	YES
637.349	-0.623852	0.135086	-4.61819	3.87109e-06	3.46221e-05	ENSG00000160218.13_TRAPPC10	down	YES
166.097	-1.27048	0.275105	-4.61817	3.87133e-06	3.46221e-05	ENSG00000172159.16_FRMD3	down	YES
416.155	-1.28228	0.277693	-4.61763	3.88155e-06	3.46744e-05	ENSG00000185112.6_FAM43A	down	YES
247.706	-1.10237	0.238724	-4.61774	3.8794e-06	3.46744e-05	ENSG00000204219.11_TCEA3	down	YES
206.944	0.982369	0.212846	4.61541	3.92329e-06	3.50277e-05	ENSG00000276043.5_UHRF1	up	YES
250.288	-2.55865	0.554511	-4.61425	3.94514e-06	3.52029e-05	ENSG00000166828.3_SCNN1G	down	YES
124.396	3.06557	0.664425	4.61387	3.95246e-06	3.52485e-05	ENSG00000268104.3_SLC6A14	up	YES
120.793	-0.721566	0.156445	-4.61226	3.98315e-06	3.55023e-05	ENSG00000107864.15_CPEB3	down	YES
58.4233	0.898706	0.194859	4.61209	3.98639e-06	3.55113e-05	ENSG00000236144.8_TMEM147-AS1	up	YES
116.831	0.813565	0.176406	4.61188	3.99042e-06	3.55273e-05	ENSG00000101391.21_CDK5RAP1	up	YES
19.5788	-1.45613	0.315863	-4.61001	4.0264e-06	3.58275e-05	ENSG00000110848.8_CD69	down	YES
146.485	0.532585	0.115546	4.60927	4.04077e-06	3.59353e-05	ENSG00000198917.13_SPOUT1	up	YES
301.779	0.510249	0.110722	4.60836	4.05849e-06	3.60727e-05	ENSG00000113649.13_TCERG1	up	YES
26.3153	1.48917	0.323334	4.60567	4.11144e-06	3.65229e-05	ENSG00000151617.17_EDNRA	up	YES
155.28	1.26101	0.273912	4.60369	4.15062e-06	3.68504e-05	ENSG00000163995.21_ABLIM2	up	YES
341.025	0.627539	0.136366	4.60187	4.18724e-06	3.71548e-05	ENSG00000103275.21_UBE2I	up	YES
719.355	0.626002	0.136059	4.60097	4.20523e-06	3.72936e-05	ENSG00000005810.19_MYCBP2	up	YES
145.772	-0.831581	0.180782	-4.59991	4.22665e-06	3.74626e-05	ENSG00000143891.17_GALM	down	YES
839.168	-1.4726	0.320158	-4.59961	4.23277e-06	3.7496e-05	ENSG00000172828.13_CES3	down	YES
38.7297	-1.26011	0.27419	-4.59576	4.31169e-06	3.81739e-05	ENSG00000173212.5_MAB21L3	down	YES
103.57	1.97515	0.42981	4.5954	4.31922e-06	3.81986e-05	ENSG00000182272.12_B4GALNT4	up	YES
118.444	1.43923	0.313189	4.5954	4.3193e-06	3.81986e-05	ENSG00000182492.16_BGN	up	YES
18.561	2.06597	0.44987	4.59238	4.3822e-06	3.87334e-05	ENSG00000198835.4_GJC2	up	YES
155.559	-0.961276	0.209329	-4.59218	4.38631e-06	3.87482e-05	ENSG00000151692.15_RNF144A	down	YES
18.9436	1.55613	0.338957	4.59093	4.41265e-06	3.89592e-05	ENSG00000236790.6_LINC00299	up	YES
94.299	0.571312	0.124464	4.59019	4.42849e-06	3.90773e-05	ENSG00000139370.12_SLC15A4	up	YES
144.071	0.471661	0.102768	4.58956	4.44174e-06	3.91137e-05	ENSG00000100395.15_L3MBTL2	up	YES
362.839	-0.587759	0.128062	-4.58966	4.43976e-06	3.91137e-05	ENSG00000108669.16_CYTH1	down	YES
438.106	-0.674816	0.147034	-4.58953	4.44244e-06	3.91137e-05	ENSG00000172661.19_WASHC2C	down	YES
111.462	0.653499	0.142383	4.58973	4.43823e-06	3.91137e-05	ENSG00000227057.10_WDR46	up	YES
501.744	-1.25648	0.273839	-4.58839	4.4668e-06	3.93064e-05	ENSG00000223572.10_CKMT1A	down	YES
167.087	0.646172	0.140835	4.58813	4.47225e-06	3.93326e-05	ENSG00000125450.11_NUP85	up	YES
56.4579	-1.8094	0.394471	-4.58691	4.4986e-06	3.95424e-05	ENSG00000072657.10_TRHDE	down	YES
94.2328	0.76335	0.166445	4.58618	4.5142e-06	3.9648e-05	ENSG00000126453.10_BCL2L12	up	YES
805.157	-0.623814	0.136024	-4.58607	4.51667e-06	3.9648e-05	ENSG00000165527.7_ARF6	down	YES
93.552	1.40412	0.306174	4.586	4.51809e-06	3.9648e-05	ENSG00000228492.2_RAB11FIP1P1	up	YES
293.637	0.469777	0.102453	4.5853	4.53331e-06	3.97596e-05	ENSG00000171206.15_TRIM8	up	YES
185.528	-1.7737	0.386848	-4.58501	4.53964e-06	3.97932e-05	ENSG00000214814.7_FER1L6	down	YES
100.361	-1.31833	0.287556	-4.5846	4.54852e-06	3.98271e-05	ENSG00000188993.4_LRRC66	down	YES
359.832	-0.757117	0.16514	-4.58469	4.54654e-06	3.98271e-05	ENSG00000206527.10_HACD2	down	YES
16.8271	0.974394	0.21255	4.58431	4.55491e-06	3.98392e-05	ENSG00000023608.5_SNAPC1	up	YES
75.211	0.6916	0.15086	4.58439	4.55321e-06	3.98392e-05	ENSG00000147099.21_HDAC8	up	YES
1216.39	-0.956936	0.208847	-4.582	4.60541e-06	4.02587e-05	ENSG00000076356.7_PLXNA2	down	YES
31.1863	1.49521	0.326353	4.58158	4.61479e-06	4.03186e-05	ENSG00000060558.4_GNA15	up	YES
1353.45	0.766284	0.167272	4.58107	4.62596e-06	4.03939e-05	ENSG00000168264.11_IRF2BP2	up	YES
1817.35	-1.13736	0.248361	-4.57947	4.66162e-06	4.06716e-05	ENSG00000074370.18_ATP2A3	down	YES
126.152	0.907853	0.198247	4.57941	4.66288e-06	4.06716e-05	ENSG00000167088.11_SNRPD1	up	YES
85.2814	0.663751	0.144958	4.57891	4.67416e-06	4.07477e-05	ENSG00000104375.17_STK3	up	YES
214.255	-1.58678	0.346816	-4.57528	4.75583e-06	4.14325e-05	ENSG00000153303.17_FRMD1	down	YES
80.8361	0.784528	0.171474	4.57519	4.75793e-06	4.14325e-05	ENSG00000166261.11_ZNF202	up	YES
50.3829	1.56548	0.342399	4.57208	4.82896e-06	4.20281e-05	ENSG00000262001.1_DLGAP1-AS2	up	YES
308.477	1.03016	0.225346	4.57144	4.84392e-06	4.21352e-05	ENSG00000116852.15_KIF21B	up	YES
575.081	0.578611	0.12659	4.57073	4.8602e-06	4.22538e-05	ENSG00000060138.13_YBX3	up	YES
309.442	1.05701	0.231354	4.5688	4.90519e-06	4.26216e-05	ENSG00000187741.15_FANCA	up	YES
37.7304	0.989973	0.216786	4.5666	4.9571e-06	4.30491e-05	ENSG00000205084.11_TMEM231	up	YES
176.203	0.940301	0.205918	4.56638	4.96209e-06	4.30689e-05	ENSG00000111602.12_TIMELESS	up	YES
428.397	0.613717	0.134426	4.56547	4.98378e-06	4.32336e-05	ENSG00000157933.10_SKI	up	YES
361.12	-1.5845	0.34708	-4.56523	4.98954e-06	4.32364e-05	ENSG00000134326.12_CMPK2	down	YES
104.163	-1.07221	0.234864	-4.56524	4.98933e-06	4.32364e-05	ENSG00000233006.8_MIR3936HG	down	YES
84.4634	-0.798375	0.174904	-4.56465	5.00326e-06	4.33132e-05	ENSG00000123595.8_RAB9A	down	YES
747.236	0.485931	0.106456	4.56463	5.00386e-06	4.33132e-05	ENSG00000127616.20_SMARCA4	up	YES
34.4972	1.415	0.310002	4.56448	5.00739e-06	4.33155e-05	ENSG00000128165.9_ADM2	up	YES
234.159	-0.654761	0.14345	-4.56439	5.00957e-06	4.33155e-05	ENSG00000140157.16_NIPA2	down	YES
140.711	-0.937575	0.205416	-4.56426	5.01249e-06	4.33172e-05	ENSG00000114166.8_KAT2B	down	YES
650.859	-0.735949	0.161272	-4.5634	5.0331e-06	4.34716e-05	ENSG00000157600.12_TMEM164	down	YES
215.924	0.787258	0.172576	4.56181	5.07156e-06	4.37801e-05	ENSG00000175115.13_PACS1	up	YES
310.556	-1.53488	0.336481	-4.56156	5.0775e-06	4.38076e-05	ENSG00000188833.10_ENTPD8	down	YES
134.688	0.884065	0.193838	4.56084	5.09493e-06	4.39341e-05	ENSG00000197283.18_SYNGAP1	up	YES
201.847	1.07527	0.235777	4.56053	5.10236e-06	4.39744e-05	ENSG00000135446.17_CDK4	up	YES
94.6917	-0.75996	0.16667	-4.55966	5.12369e-06	4.41342e-05	ENSG00000126106.14_TMEM53	down	YES
299.788	-0.453899	0.099554	-4.55933	5.13171e-06	4.41794e-05	ENSG00000110066.15_KMT5B	down	YES
132.105	0.723339	0.158681	4.55846	5.15299e-06	4.43385e-05	ENSG00000063587.15_ZNF275	up	YES
255.327	1.33389	0.292849	4.55488	5.24147e-06	4.50511e-05	ENSG00000114346.14_ECT2	up	YES
30.326	2.6819	0.588794	4.5549	5.24102e-06	4.50511e-05	ENSG00000260220.7_CCDC187	up	YES
869.526	0.744066	0.163368	4.55453	5.25022e-06	4.5102e-05	ENSG00000084207.18_GSTP1	up	YES
325.653	-1.18131	0.259382	-4.5543	5.25594e-06	4.51267e-05	ENSG00000163412.13_EIF4E3	down	YES
115.684	0.542806	0.119189	4.55417	5.25937e-06	4.51318e-05	ENSG00000141562.18_NARF	up	YES
59.1419	-1.11887	0.245724	-4.55339	5.27893e-06	4.52742e-05	ENSG00000107282.8_APBA1	down	YES
298.213	1.1077	0.243275	4.55328	5.28166e-06	4.52742e-05	ENSG00000186184.19_POLR1D	up	YES
36.288	-1.23983	0.27245	-4.55069	5.34695e-06	4.58092e-05	ENSG00000154263.17_ABCA10	down	YES
102.189	1.4318	0.314676	4.55008	5.36265e-06	4.5919e-05	ENSG00000198853.12_RUSC2	up	YES
165.315	-0.68079	0.149639	-4.54956	5.37594e-06	4.59991e-05	ENSG00000177105.10_RHOG	down	YES
20.531	-1.26055	0.277075	-4.54948	5.3778e-06	4.59991e-05	ENSG00000266903.2_CEACAM16-AS1	down	YES
640.797	-0.660042	0.145122	-4.5482	5.41076e-06	4.62562e-05	ENSG00000176393.11_RNPEP	down	YES
348.75	0.791732	0.174081	4.54806	5.41426e-06	4.62564e-05	ENSG00000106105.15_GARS1	up	YES
422.816	-0.992833	0.218302	-4.54797	5.41661e-06	4.62564e-05	ENSG00000158828.8_PINK1	down	YES
58.5596	1.2567	0.276381	4.54697	5.44234e-06	4.64512e-05	ENSG00000054967.13_RELT	up	YES
287.951	-0.939037	0.206584	-4.54555	5.47913e-06	4.67402e-05	ENSG00000070778.13_PTPN21	down	YES
14.7708	1.10022	0.242112	4.54427	5.51264e-06	4.70008e-05	ENSG00000089505.18_CMTM1	up	YES
48.4419	2.12408	0.467521	4.54329	5.53837e-06	4.71948e-05	ENSG00000198203.10_SULT1C2	up	YES
49.3732	-0.929862	0.204705	-4.54245	5.56045e-06	4.73577e-05	ENSG00000257298.1_RP3-405J10.3	down	YES
37.8528	-0.66446	0.146289	-4.5421	5.56965e-06	4.74106e-05	ENSG00000127720.8_METTL25	down	YES
339.47	-1.1751	0.258721	-4.54197	5.57306e-06	4.74143e-05	ENSG00000183317.17_EPHA10	down	YES
293.237	-1.46424	0.322428	-4.54131	5.59068e-06	4.75387e-05	ENSG00000109819.9_PPARGC1A	down	YES
36.8908	1.25603	0.276593	4.54107	5.59697e-06	4.75668e-05	ENSG00000198933.9_TBKBP1	up	YES
381.404	-1.08349	0.238657	-4.53993	5.62729e-06	4.77989e-05	ENSG00000151229.13_SLC2A13	down	YES
126.818	1.05885	0.233285	4.53885	5.65615e-06	4.80184e-05	ENSG00000078399.19_HOXA9	up	YES
456.163	-0.904645	0.199321	-4.53863	5.66221e-06	4.80442e-05	ENSG00000163932.15_PRKCD	down	YES
72.0832	0.874451	0.192686	4.53822	5.67304e-06	4.81104e-05	ENSG00000185730.8_ZNF696	up	YES
295.804	0.432586	0.0953339	4.53759	5.69004e-06	4.82288e-05	ENSG00000164080.14_RAD54L2	up	YES
29.4116	-1.30809	0.288324	-4.53689	5.7091e-06	4.83646e-05	ENSG00000136867.11_SLC31A2	down	YES
401.714	-1.32009	0.291062	-4.53543	5.7486e-06	4.86733e-05	ENSG00000139725.8_RHOF	down	YES
71.428	0.612138	0.135009	4.53406	5.78616e-06	4.89652e-05	ENSG00000160917.15_CPSF4	up	YES
529.815	0.374667	0.0826417	4.53363	5.79797e-06	4.90391e-05	ENSG00000100403.12_ZC3H7B	up	YES
210.57	-1.11237	0.245391	-4.53307	5.81333e-06	4.91429e-05	ENSG00000162482.5_AKR7A3	down	YES
2223.9	0.697611	0.153904	4.53276	5.82168e-06	4.91873e-05	ENSG00000067225.19_PKM	up	YES
102.097	1.35844	0.299717	4.53241	5.83134e-06	4.92427e-05	ENSG00000142185.17_TRPM2	up	YES
66.9168	-0.690952	0.152487	-4.53122	5.86447e-06	4.94962e-05	ENSG00000164010.15_ERMAP	down	YES
244.84	-0.80033	0.176663	-4.53025	5.89129e-06	4.96963e-05	ENSG00000168216.13_LMBRD1	down	YES
361.728	1.00593	0.222056	4.53007	5.89648e-06	4.97136e-05	ENSG00000163597.15_SNHG16	up	YES
357.179	0.675246	0.149105	4.52866	5.93589e-06	5.00194e-05	ENSG00000092201.10_SUPT16H	up	YES
105.098	1.18964	0.262711	4.52831	5.94578e-06	5.00762e-05	ENSG00000175866.16_BAIAP2	up	YES
300.594	-0.535071	0.118185	-4.52741	5.97101e-06	5.0262e-05	ENSG00000166272.18_WBP1L	down	YES
24.1222	1.26031	0.278396	4.52704	5.98157e-06	5.03243e-05	ENSG00000279281.1_RP11-226M10.3	up	YES
79.0568	0.786969	0.17387	4.52619	6.00553e-06	5.04991e-05	ENSG00000162139.10_NEU3	up	YES
190.646	0.725307	0.160276	4.52536	6.02935e-06	5.06192e-05	ENSG00000137337.15_MDC1	up	YES
98.5014	1.60155	0.353893	4.52553	6.02448e-06	5.06192e-05	ENSG00000138316.11_ADAMTS14	up	YES
72.2912	-0.543793	0.120163	-4.52546	6.02646e-06	5.06192e-05	ENSG00000176209.12_SMIM19	down	YES
88.3257	-0.611783	0.135205	-4.52486	6.04347e-06	5.07109e-05	ENSG00000065491.8_TBC1D22B	down	YES
91.2001	0.586239	0.129582	4.52408	6.0658e-06	5.08714e-05	ENSG00000083535.16_PIBF1	up	YES
103.835	1.06617	0.235705	4.52333	6.08732e-06	5.1025e-05	ENSG00000073536.18_NLE1	up	YES
48.8829	1.15813	0.256269	4.51918	6.20782e-06	5.19963e-05	ENSG00000071282.12_LMCD1	up	YES
244.292	-0.581129	0.128593	-4.51912	6.20973e-06	5.19963e-05	ENSG00000088682.14_COQ9	down	YES
272.451	0.625996	0.138536	4.51866	6.22309e-06	5.20808e-05	ENSG00000198728.11_LDB1	up	YES
185.508	0.525665	0.116353	4.51786	6.24672e-06	5.2251e-05	ENSG00000163161.14_ERCC3	up	YES
9.4914	-1.58353	0.350547	-4.5173	6.26337e-06	5.23627e-05	ENSG00000232913.8_PLCE1-AS2	down	YES
33.4957	0.919573	0.203645	4.51556	6.31508e-06	5.27673e-05	ENSG00000196083.10_IL1RAP	up	YES
13.8473	-2.0217	0.447967	-4.51306	6.38978e-06	5.33634e-05	ENSG00000165496.5_RPL10L	down	YES
164.413	0.748351	0.165824	4.51292	6.3942e-06	5.33723e-05	ENSG00000101181.18_MTG2	up	YES
41.1314	1.12878	0.250206	4.5114	6.44004e-06	5.37267e-05	ENSG00000130475.14_FCHO1	up	YES
243.071	0.565371	0.12534	4.5107	6.46147e-06	5.38772e-05	ENSG00000198792.13_TMEM184B	up	YES
1632.98	0.81432	0.180577	4.50955	6.49647e-06	5.41123e-05	ENSG00000103335.22_PIEZO1	up	YES
1635.65	-0.656604	0.1456	-4.50964	6.49366e-06	5.41123e-05	ENSG00000153113.24_CAST	down	YES
1098.72	-0.926915	0.205597	-4.5084	6.53194e-06	5.43793e-05	ENSG00000057294.16_PKP2	down	YES
114.205	1.14282	0.25355	4.50729	6.56596e-06	5.46339e-05	ENSG00000151835.17_SACS	up	YES
16.0557	1.24536	0.276318	4.50699	6.57534e-06	5.46833e-05	ENSG00000119630.14_PGF	up	YES
493.217	-0.765786	0.169928	-4.50652	6.58998e-06	5.4771e-05	ENSG00000115159.16_GPD2	down	YES
352.276	-0.747755	0.165931	-4.50643	6.59278e-06	5.4771e-05	ENSG00000157823.17_AP3S2	down	YES
100.723	1.23643	0.274437	4.50532	6.62723e-06	5.50285e-05	ENSG00000176720.6_BOK	up	YES
25.7542	1.22598	0.272188	4.50416	6.66351e-06	5.53008e-05	ENSG00000089723.10_OTUB2	up	YES
21.5995	-0.884091	0.196301	-4.50375	6.67659e-06	5.53805e-05	ENSG00000258168.6_RP11-588H23.3	down	YES
308.743	0.617768	0.137182	4.50326	6.69189e-06	5.54734e-05	ENSG00000130706.13_ADRM1	up	YES
139.062	-0.794699	0.176476	-4.50317	6.69477e-06	5.54734e-05	ENSG00000135441.7_BLOC1S1	down	YES
33.2368	1.39385	0.309598	4.50211	6.72828e-06	5.57221e-05	ENSG00000084731.15_KIF3C	up	YES
49.0644	-1.41786	0.315023	-4.50081	6.76948e-06	5.60341e-05	ENSG00000115841.21_RMDN2	down	YES
271.637	-1.77103	0.393512	-4.50057	6.77716e-06	5.60685e-05	ENSG00000168903.9_BTNL3	down	YES
26.3146	0.570599	0.12682	4.49928	6.81855e-06	5.63816e-05	ENSG00000213337.9_ANKRD39	up	YES
622.05	-1.31444	0.292153	-4.49916	6.82225e-06	5.63828e-05	ENSG00000006555.11_TTC22	down	YES
19.3085	1.13255	0.251807	4.49769	6.86952e-06	5.6744e-05	ENSG00000279196.1_RP11-1072A3.3	up	YES
120.627	0.683582	0.151991	4.49752	6.87507e-06	5.67604e-05	ENSG00000110274.16_CEP164	up	YES
856.723	-0.631733	0.140505	-4.49615	6.9196e-06	5.70984e-05	ENSG00000172493.23_AFF1	down	YES
129.912	0.878769	0.195476	4.49554	6.93926e-06	5.72309e-05	ENSG00000012048.23_BRCA1	up	YES
40.0548	-0.953211	0.212112	-4.49391	6.9928e-06	5.76426e-05	ENSG00000204613.11_TRIM10	down	YES
515.686	1.19454	0.265831	4.4936	7.00288e-06	5.76957e-05	ENSG00000142089.17_IFITM3	up	YES
16.3358	1.15967	0.2581	4.4931	7.01936e-06	5.78015e-05	ENSG00000167771.6_RCOR2	up	YES
70.6082	0.653992	0.145563	4.49286	7.02725e-06	5.78366e-05	ENSG00000185238.13_PRMT3	up	YES
82.5345	0.715743	0.159321	4.49245	7.04084e-06	5.79185e-05	ENSG00000125459.17_MSTO1	up	YES
81.4704	0.919698	0.204752	4.49177	7.06333e-06	5.80734e-05	ENSG00000110104.13_CCDC86	up	YES
59.7633	-2.00776	0.447129	-4.49033	7.11131e-06	5.84377e-05	ENSG00000162460.7_TMEM82	down	YES
53.9672	0.944326	0.210312	4.49011	7.11853e-06	5.84668e-05	ENSG00000182057.5_OGFRP1	up	YES
128.916	1.25473	0.279649	4.48679	7.23058e-06	5.93565e-05	ENSG00000143702.16_CEP170	up	YES
388.168	0.873407	0.194691	4.48611	7.25347e-06	5.94829e-05	ENSG00000055483.19_USP36	up	YES
145.337	0.670222	0.149397	4.48618	7.25126e-06	5.94829e-05	ENSG00000198171.13_DDRGK1	up	YES
16.738	1.61969	0.361058	4.48595	7.259e-06	5.94976e-05	ENSG00000128965.13_CHAC1	up	YES
36.5705	-1.93015	0.430282	-4.48577	7.26522e-06	5.95179e-05	ENSG00000139209.16_SLC38A4	down	YES
1294.88	-0.480781	0.107183	-4.4856	7.27087e-06	5.95336e-05	ENSG00000048707.15_VPS13D	down	YES
359.52	-1.40882	0.314106	-4.48518	7.28527e-06	5.96207e-05	ENSG00000006740.17_ARHGAP44	down	YES
1723.58	-0.861016	0.192015	-4.48411	7.32198e-06	5.98595e-05	ENSG00000183255.12_PTTG1IP	down	YES
74.8655	-0.650525	0.145072	-4.48415	7.32058e-06	5.98595e-05	ENSG00000214135.8_AC024560.3	down	YES
377.147	-1.08705	0.242456	-4.4835	7.34273e-06	5.99675e-05	ENSG00000079739.17_PGM1	down	YES
187.693	0.727777	0.162321	4.48358	7.34008e-06	5.99675e-05	ENSG00000187535.14_IFT140	up	YES
15.7876	1.68015	0.374769	4.48314	7.35509e-06	6.00376e-05	ENSG00000188322.8_SBK1	up	YES
59.5701	1.23261	0.275004	4.48215	7.38957e-06	6.02881e-05	ENSG00000134278.15_SPIRE1	up	YES
60.5189	0.699849	0.156159	4.48164	7.40704e-06	6.03996e-05	ENSG00000012211.13_PRICKLE3	up	YES
20.5731	1.43058	0.319233	4.4813	7.41911e-06	6.04671e-05	ENSG00000143479.18_DYRK3	up	YES
43.6705	0.671307	0.149814	4.48095	7.43106e-06	6.05334e-05	ENSG00000155592.16_ZKSCAN2	up	YES
27.9975	-2.39916	0.53551	-4.48013	7.45961e-06	6.07349e-05	ENSG00000197614.11_MFAP5	down	YES
571.416	-0.568055	0.126826	-4.47901	7.49889e-06	6.10235e-05	ENSG00000119396.11_RAB14	down	YES
598.344	-0.945714	0.211169	-4.47847	7.51812e-06	6.11487e-05	ENSG00000176595.4_KBTBD11	down	YES
42.7007	0.733359	0.163757	4.47835	7.52224e-06	6.11509e-05	ENSG00000186230.7_ZNF749	up	YES
187.641	0.588108	0.131357	4.47718	7.56337e-06	6.14539e-05	ENSG00000129187.15_DCTD	up	YES
63.5469	0.614714	0.137307	4.47692	7.57269e-06	6.14981e-05	ENSG00000196204.12_RNF216P1	up	YES
443.777	-0.788489	0.176141	-4.47648	7.58854e-06	6.15954e-05	ENSG00000119431.10_HDHD3	down	YES
258.051	-0.639227	0.142804	-4.47625	7.59664e-06	6.16296e-05	ENSG00000169410.10_PTPN9	down	YES
669.695	-0.592728	0.132442	-4.47539	7.62714e-06	6.18141e-05	ENSG00000138758.12_SEPTIN11	down	YES
58.4887	0.948395	0.21191	4.47546	7.62486e-06	6.18141e-05	ENSG00000187961.14_KLHL17	up	YES
99.1435	0.635131	0.141926	4.47508	7.63813e-06	6.18716e-05	ENSG00000167925.16_GHDC	up	YES
134.327	1.0385	0.232125	4.47387	7.68158e-06	6.21919e-05	ENSG00000090924.15_PLEKHG2	up	YES
79.2408	0.730547	0.163351	4.47226	7.73981e-06	6.26314e-05	ENSG00000141013.17_GAS8	up	YES
2031.31	-0.681239	0.152341	-4.4718	7.75633e-06	6.27331e-05	ENSG00000088888.18_MAVS	down	YES
567.13	-1.72975	0.386866	-4.47118	7.77896e-06	6.28842e-05	ENSG00000167701.14_GPT	down	YES
136.691	-0.466866	0.104423	-4.47093	7.78811e-06	6.29262e-05	ENSG00000189308.11_LIN54	down	YES
59.4392	2.14302	0.479373	4.47047	7.80491e-06	6.30134e-05	ENSG00000075213.11_SEMA3A	up	YES
526.07	0.701331	0.156883	4.47041	7.80683e-06	6.30134e-05	ENSG00000197930.13_ERO1A	up	YES
77.6447	2.81329	0.629465	4.46933	7.84664e-06	6.33026e-05	ENSG00000184292.7_TACSTD2	up	YES
268.229	0.584064	0.130696	4.46887	7.86332e-06	6.33729e-05	ENSG00000109736.15_MFSD10	up	YES
251.963	1.39443	0.312031	4.46889	7.86271e-06	6.33729e-05	ENSG00000112769.20_LAMA4	up	YES
43.78	1.4211	0.318024	4.46853	7.87604e-06	6.34432e-05	ENSG00000165891.16_E2F7	up	YES
41.0068	0.803632	0.179867	4.46793	7.89786e-06	6.35868e-05	ENSG00000187607.16_ZNF286A	up	YES
1108.44	-1.25104	0.280103	-4.46634	7.95679e-06	6.40288e-05	ENSG00000109062.12_SLC9A3R1	down	YES
2572.62	1.07925	0.241694	4.46537	7.99299e-06	6.42876e-05	ENSG00000169710.9_FASN	up	YES
168.671	0.813367	0.182156	4.46521	7.99899e-06	6.43033e-05	ENSG00000179409.11_GEMIN4	up	YES
637.032	-0.831875	0.18632	-4.46478	8.01526e-06	6.44015e-05	ENSG00000136379.12_ABHD17C	down	YES
1745.3	-0.872943	0.195542	-4.46423	8.03578e-06	6.45338e-05	ENSG00000105738.11_SIPA1L3	down	YES
135.242	0.661022	0.148106	4.46315	8.07617e-06	6.48254e-05	ENSG00000108506.13_INTS2	up	YES
73.291	0.611172	0.136955	4.46257	8.0983e-06	6.49703e-05	ENSG00000172336.5_POP7	up	YES
681.941	-0.786265	0.176196	-4.46244	8.1031e-06	6.4976e-05	ENSG00000116991.11_SIPA1L2	down	YES
551.586	-0.512648	0.114886	-4.46222	8.11147e-06	6.50103e-05	ENSG00000186951.16_PPARA	down	YES
665.734	-0.52211	0.117043	-4.46084	8.16395e-06	6.53979e-05	ENSG00000163812.15_ZDHHC3	down	YES
81.3921	-1.59448	0.357466	-4.4605	8.17674e-06	6.54675e-05	ENSG00000184113.10_CLDN5	down	YES
56.5767	1.06485	0.238763	4.45986	8.20118e-06	6.56301e-05	ENSG00000149150.9_SLC43A1	up	YES
214.987	0.495264	0.111075	4.45882	8.24115e-06	6.58836e-05	ENSG00000125484.12_GTF3C4	up	YES
173.475	1.53497	0.344246	4.45892	8.23729e-06	6.58836e-05	ENSG00000186529.16_CYP4F3	up	YES
181.373	0.427164	0.0958335	4.45736	8.29751e-06	6.63009e-05	ENSG00000012061.16_ERCC1	up	YES
21.175	-1.80111	0.4041	-4.45709	8.30784e-06	6.63501e-05	ENSG00000256643.1_LINC02441	down	YES
97.8359	0.681265	0.152857	4.45687	8.31641e-06	6.63518e-05	ENSG00000087263.17_OGFOD1	up	YES
245.795	0.839817	0.188432	4.45688	8.31628e-06	6.63518e-05	ENSG00000181588.17_MEX3D	up	YES
83.1626	0.689633	0.154778	4.45562	8.36493e-06	6.67055e-05	ENSG00000198546.15_ZNF511	up	YES
61.7385	-1.22721	0.275548	-4.45371	8.44008e-06	6.72711e-05	ENSG00000142920.17_AZIN2	down	YES
285.974	-1.80688	0.405767	-4.45301	8.46739e-06	6.74549e-05	ENSG00000077942.19_FBLN1	down	YES
15.9478	-1.09275	0.245456	-4.45191	8.51103e-06	6.77347e-05	ENSG00000213891.3_RPL3P6	down	YES
17.6053	1.68506	0.378503	4.45192	8.51056e-06	6.77347e-05	ENSG00000223650.1_UHRF2P1	up	YES
106.277	1.26697	0.284598	4.45179	8.51579e-06	6.77387e-05	ENSG00000101003.10_GINS1	up	YES
[truncated: 13,902 more rows]

## Sheet: RNAseq_stats_TCGA
baseMean	log2FoldChange	lfcSE	stat	pvalue	padj	ID	dir	Significance
31433.6	9.74951	0.40753	23.9234	1.74791e-126	3.75224e-122	ENSG00000167767	up	YES
1708.17	5.58578	0.239542	23.3186	2.86949e-120	3.07996e-116	ENSG00000114656	up	YES
7664.91	8.77911	0.397404	22.0912	3.84311e-108	2.75e-104	ENSG00000164379	up	YES
119295	7.81093	0.365648	21.3619	3.02382e-101	1.62281e-97	ENSG00000175832	up	YES
64119.2	5.27399	0.250513	21.0527	2.15823e-98	9.26614e-95	ENSG00000101255	up	YES
52883	-8.56667	0.411549	-20.8157	3.11961e-96	1.11614e-92	ENSG00000142959	down	YES
2442.84	8.42225	0.407744	20.6557	8.66972e-95	2.65876e-91	ENSG00000164283	up	YES
46987.4	9.79602	0.475728	20.5916	3.26141e-94	8.75158e-91	ENSG00000060718	up	YES
25321.8	11.9099	0.588405	20.2411	4.25812e-91	1.01566e-87	ENSG00000123500	up	YES
5462.67	6.29314	0.315798	19.9277	2.33867e-88	5.02043e-85	ENSG00000159263	up	YES
40795	8.05907	0.405117	19.8932	4.65994e-88	9.09409e-85	ENSG00000122641	up	YES
100616	6.91883	0.352809	19.6107	1.25336e-85	2.24215e-82	ENSG00000163347	up	YES
25049.8	7.25289	0.372536	19.469	2.01239e-84	3.32308e-81	ENSG00000105464	up	YES
9508.27	12.7842	0.659465	19.3857	1.01836e-83	1.5615e-80	ENSG00000214039	up	YES
667237	-2.97077	0.158613	-18.7297	2.83712e-78	3.99466e-75	ENSG00000169764	down	YES
197688	7.58244	0.404892	18.7271	2.97734e-78	3.99466e-75	ENSG00000103888	up	YES
14538.7	8.03979	0.432857	18.5738	5.23832e-77	6.61477e-74	ENSG00000178773	up	YES
75900.8	-5.96362	0.32141	-18.5546	7.48857e-77	8.93095e-74	ENSG00000163815	down	YES
99738.8	14.2378	0.769918	18.4926	2.36778e-76	2.67521e-73	ENSG00000185269	up	YES
100838	10.9931	0.604706	18.1793	7.53163e-74	8.08408e-71	ENSG00000108244	up	YES
8266.86	-7.61211	0.423735	-17.9643	3.70887e-72	3.79135e-69	ENSG00000079689	down	YES
87744	7.79973	0.440696	17.6987	4.29221e-70	4.18822e-67	ENSG00000062038	up	YES
5568.36	8.16796	0.4625	17.6604	8.45646e-70	7.89282e-67	ENSG00000105989	up	YES
11611.1	-5.66851	0.323926	-17.4994	1.44852e-68	1.29564e-65	ENSG00000111846	down	YES
5712.75	5.02671	0.288262	17.438	4.24984e-68	3.64926e-65	ENSG00000273604	up	YES
4895.57	-5.397	0.311601	-17.3203	3.30902e-67	2.73211e-64	ENSG00000065325	down	YES
36651.5	2.94556	0.172346	17.091	1.73297e-65	1.37784e-62	ENSG00000070882	up	YES
98054.3	-8.95893	0.527079	-16.9973	8.59404e-65	6.58886e-62	ENSG00000168748	down	YES
72055.1	12.6258	0.746224	16.9196	3.22886e-64	2.39014e-61	ENSG00000170373	up	YES
4663.65	4.10021	0.242941	16.8774	6.59526e-64	4.71935e-61	ENSG00000249859	up	YES
12220.6	4.07014	0.241315	16.8665	7.9329e-64	5.49341e-61	ENSG00000129474	up	YES
10021.6	11.934	0.710631	16.7936	2.71889e-63	1.82395e-60	ENSG00000167755	up	YES
2166.13	7.15141	0.426016	16.7867	3.05228e-63	1.98556e-60	ENSG00000101115	up	YES
26699.5	-8.66362	0.5179	-16.7284	8.14305e-63	5.14138e-60	ENSG00000123560	down	YES
3772.27	7.32991	0.43992	16.6619	2.47908e-62	1.52053e-59	ENSG00000236081	up	YES
176003	2.173	0.130434	16.6598	2.56678e-62	1.53059e-59	ENSG00000184575	up	YES
317.169	-7.01121	0.423314	-16.5627	1.29726e-61	7.52656e-59	ENSG00000147588	down	YES
1855.46	4.4158	0.26879	16.4285	1.19673e-60	6.76056e-58	ENSG00000131188	up	YES
13054.3	6.84147	0.417293	16.3949	2.08011e-60	1.14497e-57	ENSG00000139515	up	YES
65712.1	4.96974	0.304615	16.3148	7.74311e-60	4.15553e-57	ENSG00000101187	up	YES
49563.9	10.1367	0.623326	16.2623	1.82605e-59	9.56094e-57	ENSG00000137673	up	YES
28378.6	4.5786	0.282884	16.1854	6.39163e-59	3.26688e-56	ENSG00000173898	up	YES
2660.1	-8.13711	0.507351	-16.0384	6.88738e-58	3.4384e-55	ENSG00000125851	down	YES
29545.5	5.92463	0.372108	15.9218	4.47237e-57	2.18201e-54	ENSG00000164932	up	YES
1943.3	7.51641	0.472397	15.9112	5.29793e-57	2.52735e-54	ENSG00000281406	up	YES
24631.7	2.63021	0.165488	15.8937	7.00612e-57	3.26957e-54	ENSG00000196950	up	YES
69952.6	-10.9516	0.691085	-15.847	1.47528e-56	6.73828e-54	ENSG00000183034	down	YES
1993.53	-4.57685	0.289944	-15.7853	3.92769e-56	1.75658e-53	ENSG00000163106	down	YES
511.632	-4.82081	0.305988	-15.7549	6.35523e-56	2.78424e-53	ENSG00000164303	down	YES
3109.16	6.48492	0.412471	15.7221	1.06694e-55	4.58079e-53	ENSG00000172031	up	YES
1330.31	3.97328	0.253526	15.6721	2.34804e-55	9.88339e-53	ENSG00000265688	up	YES
848.073	4.63899	0.297759	15.5797	1.0009e-54	4.132e-52	ENSG00000187583	up	YES
613.451	7.46984	0.480545	15.5445	1.7332e-54	7.02013e-52	ENSG00000115507	up	YES
13656.6	-9.40612	0.606301	-15.5139	2.79176e-54	1.10983e-51	ENSG00000157005	down	YES
322483	7.1315	0.460222	15.4958	3.70407e-54	1.44573e-51	ENSG00000099953	up	YES
839.645	9.80346	0.634346	15.4544	7.04459e-54	2.70047e-51	ENSG00000228742	up	YES
902.883	-7.21344	0.469415	-15.3669	2.72968e-53	1.02804e-50	ENSG00000206579	down	YES
949.797	6.58367	0.429255	15.3374	4.29886e-53	1.5911e-50	ENSG00000181418	up	YES
16069.2	-7.46701	0.48855	-15.284	9.77031e-53	3.5549e-50	ENSG00000164530	down	YES
21057.7	-4.90943	0.321931	-15.25	1.64731e-52	5.89382e-50	ENSG00000168309	down	YES
21097.5	3.47335	0.228172	15.2225	2.50667e-52	8.82141e-50	ENSG00000122778	up	YES
17482.3	-7.80067	0.512535	-15.2198	2.61384e-52	9.0502e-50	ENSG00000175785	down	YES
416.975	-6.09299	0.400824	-15.2012	3.47279e-52	1.18334e-49	ENSG00000143171	down	YES
1447.77	6.95495	0.459894	15.1229	1.1432e-51	3.83453e-49	ENSG00000105219	up	YES
19887.8	2.23332	0.1492	14.9686	1.17709e-50	3.88748e-48	ENSG00000090447	up	YES
1149.33	6.86939	0.460301	14.9237	2.31093e-50	7.51649e-48	ENSG00000245694	up	YES
22493.2	2.58579	0.173815	14.8767	4.67037e-50	1.4964e-47	ENSG00000128059	up	YES
168439	4.03499	0.272194	14.824	1.02542e-49	3.23717e-47	ENSG00000050344	up	YES
10105.9	5.37027	0.362748	14.8044	1.37207e-49	4.26873e-47	ENSG00000173894	up	YES
2064.18	-6.78724	0.459764	-14.7624	2.55885e-49	7.84727e-47	ENSG00000183476	down	YES
36885.7	3.35078	0.227106	14.7543	2.88812e-49	8.73231e-47	ENSG00000111110	up	YES
438806	9.51138	0.645624	14.7321	4.01153e-49	1.19605e-46	ENSG00000015413	up	YES
2482.11	-4.56811	0.310121	-14.7301	4.13063e-49	1.21469e-46	ENSG00000102010	down	YES
3987.4	7.01278	0.476785	14.7085	5.68593e-49	1.64946e-46	ENSG00000212993	up	YES
22447.2	3.26199	0.222791	14.6415	1.52687e-48	4.37032e-46	ENSG00000006118	up	YES
101947	2.02767	0.139069	14.5803	3.74843e-48	1.05878e-45	ENSG00000108773	up	YES
389.225	-9.30654	0.639559	-14.5515	5.71405e-48	1.59303e-45	ENSG00000182938	down	YES
283862	4.25676	0.293561	14.5004	1.20422e-47	3.31424e-45	ENSG00000103257	up	YES
58096.6	9.31303	0.64258	14.4932	1.3377e-47	3.63499e-45	ENSG00000107159	up	YES
5905.8	6.48252	0.447664	14.4808	1.60245e-47	4.29997e-45	ENSG00000120149	up	YES
2175.52	5.51481	0.380895	14.4786	1.65527e-47	4.38688e-45	ENSG00000088836	up	YES
153.575	-5.99122	0.414346	-14.4595	2.18471e-47	5.71941e-45	ENSG00000122585	down	YES
1440.35	-5.45942	0.377741	-14.4528	2.40735e-47	6.22633e-45	ENSG00000186462	down	YES
117.291	-6.35644	0.439889	-14.4501	2.50308e-47	6.39687e-45	ENSG00000196666	down	YES
163934	4.59454	0.318636	14.4194	3.90846e-47	9.87093e-45	ENSG00000131389	up	YES
773.309	11.7443	0.815401	14.4031	4.94985e-47	1.22136e-44	ENSG00000129455	up	YES
125395	-5.57413	0.387005	-14.4032	4.93695e-47	1.22136e-44	ENSG00000135549	down	YES
878.183	-5.65359	0.393075	-14.383	6.61724e-47	1.61423e-44	ENSG00000205038	down	YES
95234.9	-6.29072	0.438027	-14.3615	9.02869e-47	2.17774e-44	ENSG00000168079	down	YES
17860.7	4.10529	0.286061	14.3511	1.04834e-46	2.50053e-44	ENSG00000203499	up	YES
4042.51	7.5974	0.531054	14.3063	1.99945e-46	4.71673e-44	ENSG00000137868	up	YES
134.255	-6.31492	0.441824	-14.2928	2.42532e-46	5.59832e-44	ENSG00000102683	down	YES
266.441	-6.52336	0.456403	-14.293	2.42029e-46	5.59832e-44	ENSG00000015592	down	YES
148036	-4.90128	0.343017	-14.2887	2.57203e-46	5.8738e-44	ENSG00000197766	down	YES
28149.1	6.96804	0.488818	14.2549	4.18101e-46	9.44777e-44	ENSG00000148848	up	YES
6847.23	-3.54191	0.248721	-14.2405	5.1393e-46	1.14922e-43	ENSG00000176533	down	YES
575.649	6.40887	0.450765	14.2178	7.1073e-46	1.57291e-43	ENSG00000240204	up	YES
30551.7	6.0401	0.425426	14.1978	9.45626e-46	2.0714e-43	ENSG00000088992	up	YES
3394.85	-6.33855	0.447052	-14.1786	1.24355e-45	2.69649e-43	ENSG00000147655	down	YES
113.935	-7.05582	0.498563	-14.1523	1.80726e-45	3.87965e-43	ENSG00000154080	down	YES
2989.96	-7.34698	0.519466	-14.1433	2.05347e-45	4.36455e-43	ENSG00000119147	down	YES
423.172	8.40698	0.596147	14.1022	3.6824e-45	7.75001e-43	ENSG00000186007	up	YES
2637.88	5.78342	0.411751	14.0459	8.15937e-45	1.70055e-42	ENSG00000181652	up	YES
4933.87	2.77807	0.198187	14.0174	1.22001e-44	2.51826e-42	ENSG00000105948	up	YES
2121.16	4.50664	0.322795	13.9613	2.68393e-44	5.48723e-42	ENSG00000135423	up	YES
66517.4	2.0281	0.145714	13.9184	4.90013e-44	9.92369e-42	ENSG00000067955	up	YES
23099.5	-6.715	0.482687	-13.9117	5.37827e-44	1.07902e-41	ENSG00000165072	down	YES
5686.71	4.94962	0.356907	13.8681	9.88742e-44	1.96052e-41	ENSG00000011201	up	YES
36839.6	3.23777	0.233477	13.8676	9.95464e-44	1.96052e-41	ENSG00000120254	up	YES
3198.75	6.86221	0.495258	13.8558	1.17324e-43	2.28964e-41	ENSG00000179546	up	YES
141.427	-4.63572	0.334801	-13.8462	1.34181e-43	2.59501e-41	ENSG00000253549	down	YES
192.575	3.67902	0.265928	13.8347	1.57452e-43	3.01788e-41	ENSG00000187730	up	YES
27196.4	2.60326	0.188892	13.7818	3.28129e-43	6.23359e-41	ENSG00000091127	up	YES
17695.9	3.28781	0.239233	13.7431	5.60131e-43	1.05477e-40	ENSG00000029153	up	YES
182420	-2.00047	0.145596	-13.7398	5.85983e-43	1.09385e-40	ENSG00000158828	down	YES
45864.4	1.90178	0.13901	13.6809	1.321e-42	2.44464e-40	ENSG00000105821	up	YES
96.7043	-5.25537	0.38463	-13.6635	1.67825e-42	3.07923e-40	ENSG00000171189	down	YES
22345	5.50695	0.403521	13.6473	2.09638e-42	3.81381e-40	ENSG00000151388	up	YES
596.564	-7.45394	0.546241	-13.6459	2.13623e-42	3.85365e-40	ENSG00000108231	down	YES
1216.12	5.99916	0.439858	13.6388	2.35285e-42	4.20905e-40	ENSG00000158055	up	YES
59997.3	7.99976	0.586652	13.6363	2.43647e-42	4.32262e-40	ENSG00000184292	up	YES
106.654	-4.47974	0.328563	-13.6343	2.50304e-42	4.40432e-40	ENSG00000146151	down	YES
51466.2	8.96218	0.658577	13.6084	3.56961e-42	6.22998e-40	ENSG00000170835	up	YES
11050.3	-6.75344	0.496472	-13.6029	3.85106e-42	6.667e-40	ENSG00000114200	down	YES
94820.7	6.07842	0.447277	13.5898	4.60207e-42	7.90341e-40	ENSG00000137699	up	YES
1473.07	4.75859	0.350897	13.5612	6.79866e-42	1.15831e-39	ENSG00000232445	up	YES
218.195	-6.05984	0.449247	-13.4889	1.81798e-41	3.07296e-39	ENSG00000144339	down	YES
3.07899e+06	4.83863	0.358945	13.4801	2.04773e-41	3.43427e-39	ENSG00000120708	up	YES
1101.17	5.96852	0.442965	13.474	2.22409e-41	3.70114e-39	ENSG00000145244	up	YES
4356.73	-5.93495	0.440901	-13.4609	2.65484e-41	4.38396e-39	ENSG00000163873	down	YES
6958.15	-5.49632	0.408462	-13.4561	2.83361e-41	4.64345e-39	ENSG00000162461	down	YES
1652.94	-4.96352	0.369036	-13.4499	3.08122e-41	5.01095e-39	ENSG00000100505	down	YES
315.804	-5.11576	0.381363	-13.4144	4.97861e-41	8.03578e-39	ENSG00000030304	down	YES
8499.24	4.3342	0.323593	13.394	6.55618e-41	1.05031e-38	ENSG00000254726	up	YES
19861.7	-5.53095	0.413048	-13.3906	6.86559e-41	1.09173e-38	ENSG00000036672	down	YES
52865.8	3.17395	0.23715	13.3837	7.52974e-41	1.18854e-38	ENSG00000011426	up	YES
2397.45	-3.81712	0.285407	-13.3743	8.5469e-41	1.33924e-38	ENSG00000205683	down	YES
274836	-3.56949	0.267215	-13.3581	1.06182e-40	1.65175e-38	ENSG00000122971	down	YES
20274.3	5.53856	0.41499	13.3463	1.2454e-40	1.92338e-38	ENSG00000165905	up	YES
35010.2	1.51668	0.113683	13.3412	1.3325e-40	2.04319e-38	ENSG00000133316	up	YES
258807	11.534	0.865254	13.3301	1.54606e-40	2.35384e-38	ENSG00000134827	up	YES
243.706	7.32927	0.550097	13.3236	1.68753e-40	2.55113e-38	ENSG00000204869	up	YES
120181	-2.11017	0.158445	-13.318	1.8186e-40	2.73007e-38	ENSG00000139433	down	YES
1503.37	-4.38287	0.32911	-13.3173	1.83515e-40	2.73578e-38	ENSG00000172987	down	YES
21257.8	6.74464	0.509677	13.2332	5.64594e-40	8.35872e-38	ENSG00000164398	up	YES
57728.3	-2.58281	0.195511	-13.2106	7.62189e-40	1.12068e-37	ENSG00000171503	down	YES
953.681	-5.31864	0.402882	-13.2015	8.60146e-40	1.25611e-37	ENSG00000104112	down	YES
48076.3	-2.13803	0.162168	-13.184	1.08449e-39	1.57303e-37	ENSG00000155324	down	YES
4542.44	8.0574	0.611774	13.1705	1.29661e-39	1.86807e-37	ENSG00000196335	up	YES
18424	2.14905	0.163226	13.1661	1.3755e-39	1.96852e-37	ENSG00000107815	up	YES
83643.3	10.7468	0.817067	13.1529	1.63812e-39	2.32884e-37	ENSG00000100867	up	YES
229040	3.12352	0.2375	13.1517	1.66459e-39	2.35091e-37	ENSG00000101224	up	YES
187.176	-6.54237	0.497537	-13.1495	1.71242e-39	2.40265e-37	ENSG00000070729	down	YES
4217.29	-6.30176	0.480059	-13.127	2.30468e-39	3.21263e-37	ENSG00000118432	down	YES
868.863	7.7971	0.59499	13.1046	3.09919e-39	4.26476e-37	ENSG00000128683	up	YES
264042	1.67327	0.127683	13.1048	3.08885e-39	4.26476e-37	ENSG00000106105	up	YES
200689	2.70737	0.206635	13.1021	3.20106e-39	4.37689e-37	ENSG00000171617	up	YES
355307	-5.86565	0.448503	-13.0783	4.38172e-39	5.95332e-37	ENSG00000168477	down	YES
535.568	-6.54238	0.500278	-13.0775	4.4284e-39	5.9789e-37	ENSG00000163497	down	YES
2114.16	5.58129	0.426844	13.0757	4.53137e-39	6.07968e-37	ENSG00000173391	up	YES
70763.6	3.24608	0.248573	13.0589	5.65698e-39	7.54276e-37	ENSG00000006704	up	YES
213842	-6.15786	0.471788	-13.0522	6.17543e-39	8.18321e-37	ENSG00000244734	down	YES
46455	2.47787	0.189861	13.051	6.27497e-39	8.2641e-37	ENSG00000162073	up	YES
3651.27	3.09265	0.237445	13.0247	8.85179e-39	1.15867e-36	ENSG00000196584	up	YES
326.5	-7.03828	0.540828	-13.0139	1.01994e-38	1.32697e-36	ENSG00000186038	down	YES
874.937	5.25248	0.403718	13.0103	1.06963e-38	1.38323e-36	ENSG00000181085	up	YES
10649.4	-6.80366	0.523008	-13.0087	1.09176e-38	1.4034e-36	ENSG00000187783	down	YES
303252	1.75766	0.135121	13.0081	1.10092e-38	1.40675e-36	ENSG00000126602	up	YES
117272	1.58521	0.121971	12.9966	1.27909e-38	1.62474e-36	ENSG00000141101	up	YES
1450.75	5.03305	0.387301	12.9952	1.30301e-38	1.63923e-36	ENSG00000180730	up	YES
29672	1.83982	0.141579	12.995	1.30577e-38	1.63923e-36	ENSG00000073536	up	YES
192.746	3.85079	0.296393	12.9922	1.35472e-38	1.6908e-36	ENSG00000187642	up	YES
13587.6	5.1029	0.392781	12.9917	1.36314e-38	1.69147e-36	ENSG00000088002	up	YES
7709.07	-4.19492	0.323169	-12.9806	1.57741e-38	1.94611e-36	ENSG00000105894	down	YES
28532.3	9.15096	0.705852	12.9644	1.94692e-38	2.38826e-36	ENSG00000105664	up	YES
426.94	-5.29825	0.408921	-12.9567	2.15441e-38	2.62777e-36	ENSG00000178233	down	YES
273.669	7.5135	0.580351	12.9465	2.45969e-38	2.97814e-36	ENSG00000239605	up	YES
13655.5	2.92482	0.225921	12.9462	2.46942e-38	2.97814e-36	ENSG00000071539	up	YES
12396	3.98946	0.308584	12.9283	3.11788e-38	3.7392e-36	ENSG00000157193	up	YES
25840.4	-3.2134	0.248763	-12.9175	3.58623e-38	4.27698e-36	ENSG00000198121	down	YES
820.457	-5.87625	0.455187	-12.9095	3.97763e-38	4.71756e-36	ENSG00000104722	down	YES
5884.17	-5.02001	0.389286	-12.8954	4.77601e-38	5.63333e-36	ENSG00000138669	down	YES
1084.47	-5.35638	0.415591	-12.8886	5.2178e-38	6.12079e-36	ENSG00000272573	down	YES
580.519	6.93897	0.539011	12.8735	6.34461e-38	7.40216e-36	ENSG00000227619	up	YES
162.885	6.94234	0.539499	12.8681	6.80325e-38	7.89435e-36	ENSG00000229970	up	YES
102.907	9.20194	0.715494	12.861	7.46524e-38	8.61593e-36	ENSG00000174015	up	YES
99405.9	2.68171	0.208606	12.8554	8.01969e-38	9.20634e-36	ENSG00000114346	up	YES
25570.9	-6.42793	0.50022	-12.8502	8.57894e-38	9.79596e-36	ENSG00000162706	down	YES
4224.36	6.16411	0.479748	12.8487	8.75197e-38	9.94067e-36	ENSG00000247844	up	YES
71619.8	4.30614	0.335628	12.8301	1.11217e-37	1.25658e-35	ENSG00000135069	up	YES
7368.92	2.49847	0.194784	12.8268	1.15989e-37	1.30363e-35	ENSG00000141570	up	YES
3905.19	-4.22253	0.329463	-12.8164	1.32728e-37	1.484e-35	ENSG00000189129	down	YES
18625.1	3.22618	0.251883	12.8083	1.4742e-37	1.63973e-35	ENSG00000197905	up	YES
178986	-1.90266	0.148592	-12.8046	1.54498e-37	1.70959e-35	ENSG00000152642	down	YES
393.823	7.63388	0.596385	12.8002	1.63436e-37	1.79922e-35	ENSG00000254560	up	YES
4852.87	-4.95077	0.38709	-12.7897	1.87147e-37	2.04974e-35	ENSG00000166292	down	YES
717.75	-4.41378	0.345194	-12.7864	1.95412e-37	2.12939e-35	ENSG00000198597	down	YES
85.6957	-5.84751	0.457581	-12.7792	2.14289e-37	2.3233e-35	ENSG00000269667	down	YES
3362.58	-6.61438	0.517621	-12.7784	2.16411e-37	2.33452e-35	ENSG00000277586	down	YES
145.783	-4.86004	0.380611	-12.769	2.44128e-37	2.62035e-35	ENSG00000166111	down	YES
6452.16	-5.65615	0.443287	-12.7596	2.75689e-37	2.94438e-35	ENSG00000266964	down	YES
261.601	-7.08225	0.55512	-12.7581	2.81128e-37	2.98761e-35	ENSG00000166091	down	YES
20388	-4.62931	0.362993	-12.7532	2.99323e-37	3.16531e-35	ENSG00000138722	down	YES
2438.28	-6.78641	0.532597	-12.7421	3.44963e-37	3.63006e-35	ENSG00000078549	down	YES
239955	2.25005	0.176777	12.7282	4.12078e-37	4.31516e-35	ENSG00000130826	up	YES
53806	-5.86779	0.461367	-12.7183	4.68078e-37	4.87778e-35	ENSG00000133800	down	YES
54.218	8.78556	0.691361	12.7076	5.3644e-37	5.56316e-35	ENSG00000251026	up	YES
45478.7	7.37554	0.580661	12.702	5.76618e-37	5.95108e-35	ENSG00000129451	up	YES
122591	2.99836	0.236221	12.693	6.46592e-37	6.64133e-35	ENSG00000089327	up	YES
25116.9	-3.56311	0.280851	-12.6868	6.9953e-37	7.15086e-35	ENSG00000138678	down	YES
4613.18	-7.15481	0.564742	-12.6692	8.76514e-37	8.91759e-35	ENSG00000179915	down	YES
117413	2.77896	0.219517	12.6594	9.92348e-37	1.00485e-34	ENSG00000025772	up	YES
2357.08	-4.47803	0.354036	-12.6485	1.14005e-36	1.14899e-34	ENSG00000168546	down	YES
33341.5	2.42275	0.191816	12.6306	1.43261e-36	1.4371e-34	ENSG00000101189	up	YES
188.376	-3.49851	0.277125	-12.6243	1.5515e-36	1.54912e-34	ENSG00000148680	down	YES
12178.3	4.36652	0.345975	12.6209	1.61936e-36	1.60939e-34	ENSG00000158106	up	YES
61421.5	-6.52414	0.516956	-12.6203	1.63202e-36	1.6145e-34	ENSG00000205364	down	YES
9518.84	-6.18872	0.490506	-12.617	1.70197e-36	1.67597e-34	ENSG00000135406	down	YES
27966.7	4.66374	0.369915	12.6076	1.91756e-36	1.87965e-34	ENSG00000114270	up	YES
17425.9	-6.93735	0.550837	-12.5942	2.27278e-36	2.21772e-34	ENSG00000068976	down	YES
405.953	-4.75322	0.377447	-12.5931	2.30504e-36	2.23902e-34	ENSG00000169862	down	YES
755.569	-3.93041	0.312342	-12.5837	2.59683e-36	2.51109e-34	ENSG00000128482	down	YES
122.385	-5.9825	0.475687	-12.5766	2.84134e-36	2.7352e-34	ENSG00000182050	down	YES
68.0857	-5.37083	0.427072	-12.5759	2.86373e-36	2.74445e-34	ENSG00000110975	down	YES
2078.49	4.99296	0.397292	12.5675	3.18767e-36	3.04132e-34	ENSG00000173557	up	YES
39262.6	1.26385	0.100575	12.5663	3.2365e-36	3.07425e-34	ENSG00000198000	up	YES
57530.3	1.60824	0.128129	12.5517	3.89122e-36	3.67986e-34	ENSG00000116337	up	YES
153.923	5.68386	0.454089	12.5171	6.02305e-36	5.67092e-34	ENSG00000111981	up	YES
84429.4	4.14729	0.332458	12.4746	1.02689e-35	9.6263e-34	ENSG00000183742	up	YES
12846.4	2.9359	0.235686	12.4568	1.28396e-35	1.19838e-33	ENSG00000117877	up	YES
21584.5	-2.0386	0.163704	-12.4529	1.34823e-35	1.25292e-33	ENSG00000114166	down	YES
85740.9	-4.36069	0.350208	-12.4517	1.36888e-35	1.26662e-33	ENSG00000187699	down	YES
27823.8	2.24141	0.180069	12.4475	1.44332e-35	1.32978e-33	ENSG00000141582	up	YES
13638.7	2.81512	0.226545	12.4264	1.88021e-35	1.72489e-33	ENSG00000165480	up	YES
15349	2.21864	0.178689	12.4163	2.13291e-35	1.94839e-33	ENSG00000186416	up	YES
781.317	-5.27651	0.42536	-12.4048	2.46138e-35	2.23892e-33	ENSG00000135298	down	YES
14128	1.58604	0.127916	12.3991	2.64339e-35	2.39433e-33	ENSG00000125485	up	YES
84.1141	-4.37718	0.353076	-12.3973	2.70342e-35	2.43842e-33	ENSG00000248309	down	YES
90388.4	-3.41197	0.27543	-12.3878	3.04251e-35	2.73278e-33	ENSG00000172594	down	YES
503.942	3.96258	0.320278	12.3723	3.69126e-35	3.30168e-33	ENSG00000159708	up	YES
3634.42	5.58747	0.451669	12.3707	3.76416e-35	3.35291e-33	ENSG00000106327	up	YES
5216.3	4.4934	0.363931	12.3469	5.06465e-35	4.49268e-33	ENSG00000112559	up	YES
1024.44	-4.11259	0.33347	-12.3327	6.03836e-35	5.33438e-33	ENSG00000147576	down	YES
1818.49	4.38324	0.355565	12.3275	6.43913e-35	5.66511e-33	ENSG00000272502	up	YES
52407.2	2.33709	0.189777	12.3149	7.5291e-35	6.59703e-33	ENSG00000136108	up	YES
7099.17	3.98683	0.323956	12.3067	8.33694e-35	7.27517e-33	ENSG00000171017	up	YES
532.329	-5.34744	0.434924	-12.2951	9.62147e-35	8.36211e-33	ENSG00000168356	down	YES
42175.6	1.53974	0.125343	12.2843	1.10052e-34	9.52614e-33	ENSG00000115368	up	YES
2995.18	4.53142	0.369031	12.2792	1.17112e-34	1.00966e-32	ENSG00000103253	up	YES
313764	-1.45543	0.11861	-12.2707	1.30051e-34	1.11672e-32	ENSG00000138029	down	YES
10255.7	9.54507	0.777933	12.2698	1.31616e-34	1.12566e-32	ENSG00000272620	up	YES
81.8268	-5.55168	0.452524	-12.2683	1.34101e-34	1.14236e-32	ENSG00000255986	down	YES
57.9849	-4.59783	0.375286	-12.2515	1.64849e-34	1.39874e-32	ENSG00000120907	down	YES
21549.3	-4.43997	0.362585	-12.2453	1.77985e-34	1.50425e-32	ENSG00000113594	down	YES
12270.4	6.0733	0.496303	12.2371	1.96994e-34	1.65838e-32	ENSG00000165816	up	YES
160895	-4.05875	0.331826	-12.2316	2.10785e-34	1.76755e-32	ENSG00000160191	down	YES
28790.6	1.34089	0.109646	12.2293	2.16807e-34	1.81097e-32	ENSG00000117597	up	YES
14638.9	3.3286	0.272213	12.228	2.20428e-34	1.83408e-32	ENSG00000088826	up	YES
348.259	2.79213	0.228354	12.2272	2.22441e-34	1.84368e-32	ENSG00000160401	up	YES
2136.04	-5.9715	0.488762	-12.2176	2.50347e-34	2.067e-32	ENSG00000172005	down	YES
12536.9	1.43107	0.117245	12.2058	2.89558e-34	2.38159e-32	ENSG00000083093	up	YES
36744.6	1.63669	0.134114	12.2038	2.96791e-34	2.43176e-32	ENSG00000104907	up	YES
1031.88	-5.17691	0.424222	-12.2033	2.98473e-34	2.43625e-32	ENSG00000162374	down	YES
82869.7	-3.64216	0.298567	-12.1988	3.15297e-34	2.56382e-32	ENSG00000135678	down	YES
270803	-4.20329	0.344611	-12.1972	3.2162e-34	2.60537e-32	ENSG00000164120	down	YES
586.013	-7.8531	0.644089	-12.1926	3.405e-34	2.74793e-32	ENSG00000169933	down	YES
817.224	-6.50131	0.533283	-12.1911	3.46662e-34	2.78719e-32	ENSG00000120729	down	YES
42.8726	-5.04672	0.414091	-12.1875	3.62492e-34	2.90358e-32	ENSG00000169181	down	YES
11707.5	5.82126	0.477784	12.1839	3.78762e-34	3.02263e-32	ENSG00000145506	up	YES
4936.44	4.6108	0.378521	12.1811	3.91975e-34	3.11649e-32	ENSG00000169247	up	YES
40109.3	-6.71	0.551569	-12.1653	4.75745e-34	3.76857e-32	ENSG00000152785	down	YES
1527.18	-8.39656	0.690514	-12.1599	5.08356e-34	4.01208e-32	ENSG00000224958	down	YES
153.888	5.28054	0.435247	12.1323	7.12359e-34	5.60154e-32	ENSG00000255650	up	YES
2313.29	-6.1684	0.508788	-12.1237	7.90903e-34	6.19646e-32	ENSG00000170091	down	YES
9356.97	-4.37761	0.361169	-12.1207	8.20797e-34	6.40729e-32	ENSG00000169432	down	YES
203.256	-6.86108	0.566458	-12.1122	9.09812e-34	7.07642e-32	ENSG00000187848	down	YES
158246	-1.97361	0.163039	-12.1051	9.92163e-34	7.68909e-32	ENSG00000075239	down	YES
940151	-1.95091	0.16141	-12.0867	1.24119e-33	9.58439e-32	ENSG00000117592	down	YES
65739.9	-6.13733	0.50837	-12.0726	1.47478e-33	1.13473e-31	ENSG00000269404	down	YES
2865	3.92158	0.325021	12.0656	1.60475e-33	1.23033e-31	ENSG00000174951	up	YES
4160.65	1.58114	0.131178	12.0534	1.86091e-33	1.42165e-31	ENSG00000105865	up	YES
66309.4	-3.49397	0.289972	-12.0493	1.95577e-33	1.48881e-31	ENSG00000160712	down	YES
117793	-2.56453	0.212857	-12.0481	1.98486e-33	1.50562e-31	ENSG00000067113	down	YES
161.764	7.73344	0.641936	12.0471	2.00992e-33	1.51926e-31	ENSG00000104892	up	YES
470.201	5.61325	0.466228	12.0397	2.19684e-33	1.65472e-31	ENSG00000107807	up	YES
206.413	8.2464	0.685359	12.0322	2.40539e-33	1.80548e-31	ENSG00000029559	up	YES
4.23192e+06	-6.43369	0.534847	-12.029	2.5006e-33	1.87039e-31	ENSG00000104267	down	YES
2337.23	-4.65131	0.387168	-12.0137	3.01213e-33	2.24519e-31	ENSG00000185774	down	YES
2181.27	-5.50143	0.458444	-12.0002	3.54321e-33	2.63191e-31	ENSG00000198838	down	YES
315839	3.20847	0.267441	11.9969	3.68707e-33	2.72932e-31	ENSG00000105976	up	YES
124.22	-5.66113	0.47194	-11.9954	3.75395e-33	2.76928e-31	ENSG00000165462	down	YES
317.362	5.71259	0.476244	11.9951	3.76953e-33	2.77125e-31	ENSG00000257913	up	YES
910.159	-6.77555	0.565222	-11.9874	4.13616e-33	3.03041e-31	ENSG00000101098	down	YES
1152.13	-6.4879	0.541347	-11.9847	4.27198e-33	3.11927e-31	ENSG00000175161	down	YES
3116.13	3.01423	0.251514	11.9843	4.29308e-33	3.12199e-31	ENSG00000100003	up	YES
53282.9	-5.66428	0.47265	-11.9841	4.30478e-33	3.12199e-31	ENSG00000186198	down	YES
7187.09	6.44688	0.539505	11.9496	6.52167e-33	4.71383e-31	ENSG00000183248	up	YES
10210.1	-8.34535	0.698408	-11.9491	6.56336e-33	4.72804e-31	ENSG00000130226	down	YES
162.275	7.21443	0.604231	11.9399	7.33548e-33	5.26658e-31	ENSG00000213468	up	YES
58858.6	-2.41831	0.202552	-11.9392	7.39303e-33	5.29021e-31	ENSG00000163412	down	YES
878.807	4.79159	0.401904	11.9222	9.06483e-33	6.46494e-31	ENSG00000148734	up	YES
6703.97	-3.57495	0.299878	-11.9213	9.1627e-33	6.5131e-31	ENSG00000174944	down	YES
353808	1.76222	0.14793	11.9126	1.01797e-32	7.21217e-31	ENSG00000128050	up	YES
1516.96	4.65703	0.391833	11.8852	1.41244e-32	9.97399e-31	ENSG00000196754	up	YES
78613.5	1.79625	0.15128	11.8737	1.62146e-32	1.14124e-30	ENSG00000166012	up	YES
70749.1	3.55283	0.29928	11.8712	1.66984e-32	1.17145e-30	ENSG00000172164	up	YES
3035.06	5.23637	0.441734	11.8541	2.04804e-32	1.43209e-30	ENSG00000115363	up	YES
36685.4	2.99183	0.252484	11.8496	2.16198e-32	1.50686e-30	ENSG00000118707	up	YES
74026.3	1.83557	0.155305	11.8191	3.10869e-32	2.15968e-30	ENSG00000175792	up	YES
797317	-2.49186	0.21084	-11.8187	3.12386e-32	2.16323e-30	ENSG00000137767	down	YES
779.915	6.32786	0.535749	11.8112	3.41494e-32	2.35719e-30	ENSG00000131015	up	YES
32.646	-4.19565	0.355333	-11.8076	3.56423e-32	2.45235e-30	ENSG00000172554	down	YES
57870.2	-4.37761	0.37089	-11.803	3.76702e-32	2.5836e-30	ENSG00000166816	down	YES
3009.2	2.6376	0.22352	11.8003	3.88914e-32	2.65886e-30	ENSG00000172167	up	YES
40.6404	-5.00124	0.423837	-11.7999	3.90801e-32	2.66328e-30	ENSG00000226087	down	YES
17244.3	4.81805	0.408425	11.7967	4.06094e-32	2.75874e-30	ENSG00000138028	up	YES
116.343	3.97377	0.337195	11.7848	4.67555e-32	3.16625e-30	ENSG00000232850	up	YES
213.111	4.9419	0.419977	11.7671	5.76839e-32	3.89402e-30	ENSG00000186451	up	YES
1459.28	2.88753	0.24561	11.7566	6.53163e-32	4.39544e-30	ENSG00000127423	up	YES
28732.7	-8.84043	0.752092	-11.7545	6.69923e-32	4.49414e-30	ENSG00000167281	down	YES
48579.6	1.36521	0.116465	11.722	9.8268e-32	6.57171e-30	ENSG00000106443	up	YES
12052	6.0975	0.520371	11.7176	1.03561e-31	6.90419e-30	ENSG00000081277	up	YES
128272	-3.50651	0.2995	-11.7079	1.16162e-31	7.7203e-30	ENSG00000127951	down	YES
80979.6	-8.23919	0.704836	-11.6895	1.44217e-31	9.55524e-30	ENSG00000115263	down	YES
702.81	3.96998	0.33988	11.6805	1.60268e-31	1.05861e-29	ENSG00000198723	up	YES
1679.83	-6.47786	0.554741	-11.6773	1.66541e-31	1.09667e-29	ENSG00000111404	down	YES
25661.8	1.7463	0.149625	11.6712	1.78982e-31	1.17267e-29	ENSG00000147874	up	YES
356.769	-5.06264	0.433777	-11.6711	1.79176e-31	1.17267e-29	ENSG00000137441	down	YES
100577	1.63204	0.139842	11.6706	1.80236e-31	1.17602e-29	ENSG00000133612	up	YES
238126	-2.16905	0.1861	-11.6552	2.15778e-31	1.40367e-29	ENSG00000079739	down	YES
27916.7	-3.29345	0.282706	-11.6498	2.3011e-31	1.49238e-29	ENSG00000169860	down	YES
2641.87	-7.91581	0.679661	-11.6467	2.38506e-31	1.54217e-29	ENSG00000034971	down	YES
104165	2.23281	0.191833	11.6393	2.60036e-31	1.67633e-29	ENSG00000167747	up	YES
81358.4	-6.50622	0.559156	-11.6358	2.71051e-31	1.74211e-29	ENSG00000118777	down	YES
5649.97	4.96527	0.426836	11.6328	2.80891e-31	1.79997e-29	ENSG00000171388	up	YES
30734	-5.1863	0.445926	-11.6304	2.887e-31	1.8445e-29	ENSG00000100628	down	YES
2759.43	7.91163	0.680496	11.6263	3.03037e-31	1.93035e-29	ENSG00000182379	up	YES
116898	1.44719	0.124494	11.6246	3.09032e-31	1.96272e-29	ENSG00000136271	up	YES
266544	2.19725	0.189031	11.6238	3.12021e-31	1.97586e-29	ENSG00000124207	up	YES
14338.8	-4.07018	0.350241	-11.6211	3.21947e-31	2.03272e-29	ENSG00000119919	down	YES
226.54	-5.00104	0.430697	-11.6115	3.60137e-31	2.26717e-29	ENSG00000101489	down	YES
46927.2	-2.38528	0.205463	-11.6093	3.69637e-31	2.32017e-29	ENSG00000178537	down	YES
89244.5	3.15788	0.27214	11.6039	3.93804e-31	2.46466e-29	ENSG00000175063	up	YES
3838.88	7.63818	0.658965	11.5912	4.56805e-31	2.85065e-29	ENSG00000275216	up	YES
8449.17	-2.75327	0.237601	-11.5878	4.75211e-31	2.95691e-29	ENSG00000115841	down	YES
32848.4	1.50518	0.129947	11.583	5.02362e-31	3.11682e-29	ENSG00000163900	up	YES
112730	1.46744	0.126767	11.5759	5.46151e-31	3.37874e-29	ENSG00000135372	up	YES
74.3552	-7.21207	0.623101	-11.5745	5.55077e-31	3.42409e-29	ENSG00000070748	down	YES
26257.3	2.56908	0.222049	11.5698	5.85873e-31	3.6037e-29	ENSG00000133119	up	YES
1659.52	-6.62507	0.572825	-11.5656	6.15503e-31	3.77515e-29	ENSG00000165197	down	YES
61338	2.0028	0.173193	11.5639	6.27725e-31	3.83914e-29	ENSG00000161091	up	YES
15937.6	1.70131	0.147291	11.5507	7.32433e-31	4.4668e-29	ENSG00000165724	up	YES
3751.35	-6.06289	0.524989	-11.5486	7.50302e-31	4.56281e-29	ENSG00000108018	down	YES
30.9831	3.78826	0.328281	11.5397	8.32166e-31	5.04636e-29	ENSG00000130711	up	YES
75921	-4.79286	0.415491	-11.5354	8.74601e-31	5.28875e-29	ENSG00000168497	down	YES
2433.91	4.78073	0.414589	11.5312	9.18081e-31	5.53608e-29	ENSG00000125895	up	YES
975.864	5.14703	0.446783	11.5202	1.04388e-30	6.277e-29	ENSG00000198759	up	YES
87519	1.8387	0.159679	11.5149	1.10953e-30	6.65312e-29	ENSG00000163811	up	YES
48779.2	2.2817	0.198219	11.511	1.16155e-30	6.94566e-29	ENSG00000156697	up	YES
1563.43	-4.12054	0.358013	-11.5095	1.18167e-30	7.04638e-29	ENSG00000272463	down	YES
903.849	-5.90367	0.513105	-11.5058	1.23386e-30	7.33719e-29	ENSG00000174403	down	YES
120192	7.89771	0.686576	11.503	1.27352e-30	7.55213e-29	ENSG00000165376	up	YES
7.80268e+06	-3.23576	0.281518	-11.494	1.41486e-30	8.36718e-29	ENSG00000135916	down	YES
28.8592	-3.36607	0.292987	-11.4888	1.50179e-30	8.85686e-29	ENSG00000263812	down	YES
35480.3	-6.38108	0.556293	-11.4707	1.85118e-30	1.08875e-28	ENSG00000242366	down	YES
7737.74	2.76462	0.241174	11.4632	2.0194e-30	1.18444e-28	ENSG00000091651	up	YES
966.481	5.79617	0.505961	11.4558	2.20008e-30	1.2869e-28	ENSG00000279184	up	YES
66808.6	1.76458	0.154089	11.4517	2.30605e-30	1.34522e-28	ENSG00000111641	up	YES
7295.11	7.40764	0.647084	11.4477	2.41365e-30	1.40417e-28	ENSG00000237643	up	YES
70289.4	-1.75898	0.153674	-11.4462	2.45819e-30	1.42621e-28	ENSG00000198894	down	YES
681291	-2.51426	0.219767	-11.4406	2.62198e-30	1.51714e-28	ENSG00000150593	down	YES
1661.78	4.43653	0.38785	11.4388	2.67555e-30	1.54398e-28	ENSG00000149243	up	YES
101848	-2.9311	0.256446	-11.4297	2.97224e-30	1.71059e-28	ENSG00000138193	down	YES
2734.35	8.17449	0.715219	11.4294	2.9831e-30	1.71225e-28	ENSG00000111700	up	YES
533.51	-6.01971	0.526699	-11.4291	2.9911e-30	1.71226e-28	ENSG00000147724	down	YES
356469	2.25769	0.197594	11.4259	3.10374e-30	1.76265e-28	ENSG00000110092	up	YES
3480.35	9.34218	0.8176	11.4263	3.08861e-30	1.76265e-28	ENSG00000181333	up	YES
646.22	-4.4354	0.388182	-11.4261	3.09815e-30	1.76265e-28	ENSG00000183798	down	YES
173995	-5.24316	0.459163	-11.419	3.3624e-30	1.9045e-28	ENSG00000242515	down	YES
3220.18	-4.10273	0.35939	-11.4158	3.48585e-30	1.96923e-28	ENSG00000173267	down	YES
193.582	-6.20959	0.544119	-11.4122	3.63476e-30	2.04796e-28	ENSG00000187140	down	YES
228954	2.2329	0.195807	11.4036	4.01212e-30	2.25467e-28	ENSG00000101158	up	YES
736.742	4.80075	0.421146	11.3993	4.21734e-30	2.3638e-28	ENSG00000162004	up	YES
63621.7	2.61414	0.22941	11.3951	4.42375e-30	2.47304e-28	ENSG00000184428	up	YES
11185.2	3.87136	0.339856	11.3912	4.62662e-30	2.57973e-28	ENSG00000008300	up	YES
77364.9	1.59752	0.140262	11.3896	4.71355e-30	2.62139e-28	ENSG00000105983	up	YES
33.0146	-5.31116	0.466409	-11.3873	4.83548e-30	2.68226e-28	ENSG00000137675	down	YES
87790.5	-7.98068	0.700982	-11.385	4.96737e-30	2.74831e-28	ENSG00000044012	down	YES
12356.6	-6.29907	0.55351	-11.3802	5.24639e-30	2.89522e-28	ENSG00000183287	down	YES
6.3544e+06	1.51902	0.133564	11.3729	5.7051e-30	3.13565e-28	ENSG00000096384	up	YES
1039.34	-6.31512	0.555282	-11.3728	5.71127e-30	3.13565e-28	ENSG00000169760	down	YES
114761	-8.70355	0.7658	-11.3653	6.22456e-30	3.40874e-28	ENSG00000131096	down	YES
199439	2.25358	0.19837	11.3605	6.57873e-30	3.59353e-28	ENSG00000123989	up	YES
438.218	-4.17174	0.367488	-11.352	7.24559e-30	3.94774e-28	ENSG00000213760	down	YES
1212.22	7.851	0.691754	11.3494	7.46582e-30	4.05743e-28	ENSG00000043355	up	YES
5530.1	3.77928	0.333224	11.3416	8.16641e-30	4.42698e-28	ENSG00000261373	up	YES
215772	1.67139	0.14743	11.3368	8.62386e-30	4.66318e-28	ENSG00000106628	up	YES
30717.6	-4.86615	0.429608	-11.327	9.64925e-30	5.20453e-28	ENSG00000173175	down	YES
401.695	-2.37732	0.209977	-11.3218	1.02311e-29	5.50455e-28	ENSG00000259319	down	YES
6367.66	-5.23781	0.462927	-11.3145	1.11182e-29	5.96684e-28	ENSG00000067840	down	YES
146590	-4.03987	0.357213	-11.3094	1.17872e-29	6.31013e-28	ENSG00000184434	down	YES
35454.8	1.67809	0.148391	11.3086	1.19013e-29	6.35535e-28	ENSG00000125630	up	YES
2415.66	1.95678	0.173073	11.3061	1.22404e-29	6.52021e-28	ENSG00000143498	up	YES
470.055	4.33368	0.383474	11.3011	1.29577e-29	6.88523e-28	ENSG00000243587	up	YES
24242.4	3.44103	0.304558	11.2984	1.33608e-29	7.08187e-28	ENSG00000135245	up	YES
10203.8	2.45508	0.217389	11.2935	1.41293e-29	7.47076e-28	ENSG00000132003	up	YES
25028.1	-3.80008	0.336658	-11.2877	1.50978e-29	7.96326e-28	ENSG00000176641	down	YES
113060	1.56494	0.138857	11.2701	1.84337e-29	9.69892e-28	ENSG00000055044	up	YES
636.297	9.34558	0.829274	11.2696	1.85431e-29	9.73264e-28	ENSG00000233532	up	YES
94964.8	1.54419	0.137026	11.2693	1.85965e-29	9.73686e-28	ENSG00000163597	up	YES
112206	-4.07515	0.362093	-11.2544	2.20221e-29	1.15024e-27	ENSG00000253958	down	YES
83914.3	1.44251	0.128215	11.2507	2.29739e-29	1.19704e-27	ENSG00000107937	up	YES
3964.1	7.10176	0.631269	11.25	2.31654e-29	1.2041e-27	ENSG00000170231	up	YES
83723.5	-4.14486	0.368727	-11.241	2.56515e-29	1.3301e-27	ENSG00000171227	down	YES
77.467	6.33605	0.564287	11.2284	2.95761e-29	1.5299e-27	ENSG00000145040	up	YES
148.7	-6.02534	0.536679	-11.2271	3.00257e-29	1.54943e-27	ENSG00000118733	down	YES
131198	-1.54992	0.138143	-11.2197	3.26367e-29	1.68013e-27	ENSG00000160445	down	YES
169286	2.92271	0.260572	11.2165	3.38374e-29	1.73777e-27	ENSG00000088325	up	YES
17377.6	2.03196	0.181228	11.2122	3.55199e-29	1.81982e-27	ENSG00000104312	up	YES
31735.8	-1.99435	0.177887	-11.2113	3.58805e-29	1.83392e-27	ENSG00000137936	down	YES
296139	1.6171	0.144441	11.1956	4.28427e-29	2.18457e-27	ENSG00000166197	up	YES
495.932	-4.58754	0.40984	-11.1935	4.38833e-29	2.23233e-27	ENSG00000120498	down	YES
25422.5	-5.50646	0.4921	-11.1897	4.57889e-29	2.32376e-27	ENSG00000141338	down	YES
99.2518	-4.80094	0.429338	-11.1822	4.98444e-29	2.52361e-27	ENSG00000197561	down	YES
1729.34	-4.77252	0.426993	-11.1771	5.28109e-29	2.66751e-27	ENSG00000108381	down	YES
29058.5	1.76823	0.158206	11.1768	5.29649e-29	2.66901e-27	ENSG00000134815	up	YES
134.599	-4.92594	0.441162	-11.1658	5.99301e-29	3.01292e-27	ENSG00000265489	down	YES
92623.5	3.33325	0.298549	11.1648	6.06008e-29	3.03953e-27	ENSG00000139629	up	YES
340.537	-4.44583	0.398765	-11.149	7.24333e-29	3.62453e-27	ENSG00000169313	down	YES
86335.8	-2.38289	0.213789	-11.146	7.49095e-29	3.73954e-27	ENSG00000166311	down	YES
24254.2	2.48147	0.222637	11.1458	7.50799e-29	3.73954e-27	ENSG00000104369	up	YES
1408.81	-6.76241	0.606845	-11.1436	7.698e-29	3.8253e-27	ENSG00000171819	down	YES
256761	1.82741	0.164006	11.1424	7.80138e-29	3.86772e-27	ENSG00000196411	up	YES
869.717	-4.82838	0.433546	-11.1369	8.29225e-29	4.10161e-27	ENSG00000127074	down	YES
32820.6	1.65945	0.149026	11.1353	8.44913e-29	4.1696e-27	ENSG00000178105	up	YES
1647.45	-6.08588	0.546838	-11.1292	9.04314e-29	4.4525e-27	ENSG00000106278	down	YES
1089.35	4.70322	0.422707	11.1264	9.33088e-29	4.58366e-27	ENSG00000110944	up	YES
41546.9	1.59536	0.143396	11.1256	9.42187e-29	4.61779e-27	ENSG00000123374	up	YES
5338.57	2.23348	0.20076	11.1251	9.4686e-29	4.63012e-27	ENSG00000065600	up	YES
4898.77	2.49864	0.224661	11.1218	9.82531e-29	4.79363e-27	ENSG00000236144	up	YES
5549.06	6.63297	0.596415	11.1214	9.87139e-29	4.80519e-27	ENSG00000158296	up	YES
45.664	-5.92729	0.533118	-11.1181	1.02374e-28	4.97207e-27	ENSG00000040731	down	YES
28282.8	-4.25666	0.382889	-11.1172	1.03447e-28	5.01286e-27	ENSG00000101955	down	YES
535.055	-6.31572	0.568165	-11.116	1.0486e-28	5.06987e-27	ENSG00000110887	down	YES
1962.58	-2.95221	0.265871	-11.1039	1.20103e-28	5.7938e-27	ENSG00000225335	down	YES
63.2082	8.20572	0.739369	11.0983	1.27889e-28	6.15559e-27	ENSG00000232679	up	YES
2.21268e+06	1.80288	0.162476	11.0963	1.30731e-28	6.27832e-27	ENSG00000144381	up	YES
623.567	-3.89688	0.351265	-11.0938	1.34387e-28	6.43946e-27	ENSG00000196376	down	YES
14126.2	5.89188	0.531379	11.0879	1.43599e-28	6.86558e-27	ENSG00000171004	up	YES
81.6299	-4.34337	0.391752	-11.087	1.45005e-28	6.91737e-27	ENSG00000168314	down	YES
14965.7	2.20547	0.198996	11.083	1.51701e-28	7.22077e-27	ENSG00000146733	up	YES
1015.06	3.44636	0.311061	11.0794	1.57968e-28	7.50243e-27	ENSG00000179431	up	YES
317447	-3.1067	0.280409	-11.0792	1.58333e-28	7.50318e-27	ENSG00000078804	down	YES
164.674	-5.45123	0.492119	-11.0771	1.62102e-28	7.66487e-27	ENSG00000267206	down	YES
554.776	-4.74756	0.42882	-11.0712	1.73052e-28	8.16464e-27	ENSG00000274736	down	YES
196467	-3.44463	0.311149	-11.0707	1.74066e-28	8.19446e-27	ENSG00000278535	down	YES
595.993	-6.50045	0.587203	-11.0702	1.75034e-28	8.22201e-27	ENSG00000254645	down	YES
61268.7	-5.13022	0.463805	-11.0611	1.93608e-28	9.07462e-27	ENSG00000167701	down	YES
821.826	-3.79277	0.342901	-11.0608	1.94313e-28	9.08785e-27	ENSG00000165495	down	YES
2966.34	2.40713	0.21768	11.0581	2.00308e-28	9.34561e-27	ENSG00000112877	up	YES
171.413	3.87041	0.350012	11.0579	2.00695e-28	9.34561e-27	ENSG00000187695	up	YES
1.99304e+07	-2.78103	0.251503	-11.0577	2.01293e-28	9.35316e-27	ENSG00000171747	down	YES
2521.21	-4.90196	0.44334	-11.0569	2.02984e-28	9.41135e-27	ENSG00000143867	down	YES
125.69	8.58249	0.776339	11.0551	2.07144e-28	9.58354e-27	ENSG00000236452	up	YES
221973	-2.02952	0.183646	-11.0513	2.16038e-28	9.97354e-27	ENSG00000138600	down	YES
18726.4	-2.75052	0.249152	-11.0395	2.46359e-28	1.13489e-26	ENSG00000172348	down	YES
1454.99	2.29402	0.207816	11.0388	2.48458e-28	1.14211e-26	ENSG00000154920	up	YES
165.542	5.11021	0.462968	11.0379	2.50722e-28	1.15005e-26	ENSG00000138152	up	YES
27451.7	-6.33267	0.57389	-11.0346	2.60127e-28	1.19065e-26	ENSG00000116194	down	YES
2.50488e+06	-1.7558	0.159137	-11.0333	2.64081e-28	1.20618e-26	ENSG00000152234	down	YES
7100.82	2.72433	0.246975	11.0308	2.7148e-28	1.23734e-26	ENSG00000136982	up	YES
588174	-5.14188	0.466253	-11.0281	2.79781e-28	1.27082e-26	ENSG00000022267	down	YES
472246	1.71756	0.155746	11.028	2.80009e-28	1.27082e-26	ENSG00000122565	up	YES
4073.63	2.82274	0.256023	11.0253	2.88429e-28	1.30627e-26	ENSG00000197275	up	YES
277550	-2.25059	0.204238	-11.0194	3.07969e-28	1.39182e-26	ENSG00000165795	down	YES
52826	2.57443	0.23378	11.0122	3.33739e-28	1.50512e-26	ENSG00000156802	up	YES
17826.1	-2.80106	0.254375	-11.0116	3.36087e-28	1.51197e-26	ENSG00000073711	down	YES
23690	-2.23853	0.203291	-11.0114	3.36666e-28	1.51197e-26	ENSG00000118804	down	YES
10653.5	2.41979	0.219761	11.011	3.38124e-28	1.51535e-26	ENSG00000139734	up	YES
329.21	3.34916	0.304212	11.0093	3.44725e-28	1.54171e-26	ENSG00000234753	up	YES
114295	-3.19686	0.290458	-11.0063	3.56414e-28	1.59067e-26	ENSG00000151623	down	YES
508.423	-4.40994	0.400962	-10.9984	3.88886e-28	1.732e-26	ENSG00000141668	down	YES
543374	-5.15812	0.469059	-10.9967	3.96179e-28	1.76082e-26	ENSG00000125144	down	YES
1.24982e+06	1.45784	0.132657	10.9896	4.28965e-28	1.9026e-26	ENSG00000147140	up	YES
11280.3	-5.35036	0.487506	-10.975	5.04211e-28	2.23173e-26	ENSG00000197165	down	YES
326.343	-5.64877	0.515032	-10.9678	5.4578e-28	2.41075e-26	ENSG00000167654	down	YES
574514	1.62641	0.148341	10.964	5.69368e-28	2.50978e-26	ENSG00000146731	up	YES
100535	3.09466	0.282323	10.9614	5.85687e-28	2.57642e-26	ENSG00000068650	up	YES
22891.4	-6.7618	0.617015	-10.9589	6.02347e-28	2.64429e-26	ENSG00000126950	down	YES
1373.86	-6.07161	0.554052	-10.9586	6.04533e-28	2.64847e-26	ENSG00000184144	down	YES
2187.99	4.03134	0.368264	10.9469	6.87705e-28	3.00672e-26	ENSG00000183960	up	YES
14632.1	-5.17316	0.472689	-10.9441	7.09229e-28	3.09452e-26	ENSG00000163295	down	YES
16235.6	9.22645	0.843238	10.9417	7.28231e-28	3.17098e-26	ENSG00000103355	up	YES
455.155	-7.12923	0.651892	-10.9362	7.73684e-28	3.36208e-26	ENSG00000115665	down	YES
1726.41	6.01801	0.550403	10.9338	7.94263e-28	3.44453e-26	ENSG00000095752	up	YES
96634.8	2.85661	0.26141	10.9277	8.49824e-28	3.67806e-26	ENSG00000186193	up	YES
240913	-4.64358	0.425272	-10.9191	9.34437e-28	4.03613e-26	ENSG00000198624	down	YES
19711.6	5.84021	0.535085	10.9146	9.82107e-28	4.23351e-26	ENSG00000198535	up	YES
53782.6	-4.46781	0.409453	-10.9117	1.01395e-27	4.36203e-26	ENSG00000198417	down	YES
117.447	-3.33963	0.306287	-10.9036	1.10798e-27	4.75702e-26	ENSG00000225194	down	YES
108.298	-5.4193	0.497083	-10.9022	1.12495e-27	4.82024e-26	ENSG00000072041	down	YES
76392.1	-3.11896	0.286092	-10.9019	1.12831e-27	4.82499e-26	ENSG00000122694	down	YES
99.3125	-4.88195	0.447821	-10.9016	1.13282e-27	4.83463e-26	ENSG00000174576	down	YES
18072.8	-6.96535	0.639043	-10.8997	1.1569e-27	4.91786e-26	ENSG00000237125	down	YES
24494.9	10.684	0.980205	10.8998	1.15564e-27	4.91786e-26	ENSG00000163736	up	YES
310.737	-2.39818	0.220199	-10.891	1.27281e-27	5.3936e-26	ENSG00000177692	down	YES
3880.3	-6.97008	0.639992	-10.8909	1.27384e-27	5.3936e-26	ENSG00000100146	down	YES
1332.6	-3.52367	0.323625	-10.8881	1.31317e-27	5.54918e-26	ENSG00000173320	down	YES
7957.59	-5.07595	0.466462	-10.8818	1.40774e-27	5.93712e-26	ENSG00000124440	down	YES
20495.5	1.76543	0.162297	10.8778	1.47107e-27	6.19206e-26	ENSG00000145220	up	YES
16675.8	4.37112	0.401892	10.8763	1.49439e-27	6.27789e-26	ENSG00000101104	up	YES
1534.92	-6.85737	0.63136	-10.8613	1.7628e-27	7.39102e-26	ENSG00000073734	down	YES
5874.94	-3.03478	0.279466	-10.8592	1.80327e-27	7.54595e-26	ENSG00000181804	down	YES
658144	-2.5131	0.231519	-10.8548	1.89152e-27	7.89985e-26	ENSG00000042445	down	YES
35479.7	-4.81072	0.443238	-10.8536	1.91772e-27	7.99372e-26	ENSG00000145362	down	YES
3.91597e+06	-2.83983	0.26178	-10.8481	2.03522e-27	8.46152e-26	ENSG00000148180	down	YES
22483	-4.64899	0.428557	-10.848	2.03783e-27	8.46152e-26	ENSG00000170382	down	YES
344.347	2.89222	0.266662	10.846	2.08276e-27	8.6314e-26	ENSG00000101898	up	YES
43793.5	-7.70485	0.71049	-10.8444	2.11983e-27	8.76807e-26	ENSG00000171246	down	YES
617.655	-3.67117	0.338648	-10.8406	2.20897e-27	9.11329e-26	ENSG00000168913	down	YES
74526.2	1.50462	0.138795	10.8405	2.21178e-27	9.11329e-26	ENSG00000170632	up	YES
3208.79	3.13281	0.289003	10.8401	2.2226e-27	9.14034e-26	ENSG00000143882	up	YES
21851.1	1.86887	0.172453	10.837	2.29934e-27	9.43784e-26	ENSG00000112578	up	YES
67.7523	-5.13041	0.473476	-10.8356	2.33343e-27	9.5595e-26	ENSG00000111249	down	YES
564.934	-5.72355	0.528226	-10.8354	2.33888e-27	9.56359e-26	ENSG00000133169	down	YES
1736.53	3.25535	0.300505	10.8329	2.4034e-27	9.80871e-26	ENSG00000134317	up	YES
37890	5.11254	0.47199	10.8319	2.43155e-27	9.90477e-26	ENSG00000102359	up	YES
14765.2	5.68714	0.525108	10.8304	2.47009e-27	1.00427e-25	ENSG00000233695	up	YES
21982.8	7.58081	0.700829	10.8169	2.86239e-27	1.16157e-25	ENSG00000134762	up	YES
1.04942e+06	-4.66931	0.431683	-10.8165	2.87433e-27	1.16421e-25	ENSG00000117115	down	YES
19654.3	-5.13869	0.47513	-10.8154	2.91176e-27	1.17715e-25	ENSG00000151892	down	YES
310.435	-5.44813	0.503982	-10.8102	3.08105e-27	1.24325e-25	ENSG00000258986	down	YES
504.841	-7.59715	0.703307	-10.802	3.36655e-27	1.35591e-25	ENSG00000165553	down	YES
4397.9	5.6298	0.521241	10.8008	3.41342e-27	1.37221e-25	ENSG00000232803	up	YES
27561.5	9.9296	0.920231	10.7903	3.82414e-27	1.53444e-25	ENSG00000198842	up	YES
13590.1	1.68263	0.155958	10.7889	3.88254e-27	1.55497e-25	ENSG00000249115	up	YES
16468.6	-2.09534	0.194287	-10.7848	4.06241e-27	1.62398e-25	ENSG00000235863	down	YES
17491.6	-3.45085	0.320133	-10.7794	4.3052e-27	1.71784e-25	ENSG00000154721	down	YES
16427.7	-5.38797	0.500064	-10.7746	4.53984e-27	1.8081e-25	ENSG00000101605	down	YES
1262.93	2.23014	0.207011	10.7731	4.61313e-27	1.83389e-25	ENSG00000232442	up	YES
68.4917	-5.6665	0.52611	-10.7705	4.74189e-27	1.88159e-25	ENSG00000065371	down	YES
661.525	-6.81637	0.633172	-10.7654	5.0124e-27	1.98526e-25	ENSG00000109132	down	YES
257.237	-3.95554	0.36765	-10.759	5.37556e-27	2.12518e-25	ENSG00000183549	down	YES
973221	-3.47131	0.322671	-10.758	5.43094e-27	2.14312e-25	ENSG00000158467	down	YES
3912.51	-3.09735	0.287953	-10.7564	5.52749e-27	2.17722e-25	ENSG00000171724	down	YES
325.532	-5.48722	0.510279	-10.7534	5.71387e-27	2.24652e-25	ENSG00000158458	down	YES
32099.5	3.30464	0.307364	10.7515	5.82842e-27	2.28736e-25	ENSG00000116017	up	YES
64437.2	-3.14006	0.292136	-10.7486	6.01617e-27	2.35674e-25	ENSG00000187091	down	YES
29.015	-5.48576	0.510472	-10.7465	6.15797e-27	2.40364e-25	ENSG00000188816	down	YES
178.666	-5.26793	0.490201	-10.7465	6.1583e-27	2.40364e-25	ENSG00000254510	down	YES
225.95	8.54643	0.796863	10.7251	7.76093e-27	3.02366e-25	ENSG00000196260	up	YES
77559.3	2.31942	0.216355	10.7204	8.16392e-27	3.17491e-25	ENSG00000166123	up	YES
26918.6	1.71341	0.159864	10.7179	8.38525e-27	3.25508e-25	ENSG00000135912	up	YES
426.464	-6.07728	0.567219	-10.7142	8.73472e-27	3.38462e-25	ENSG00000152092	down	YES
3134.21	5.05536	0.472002	10.7105	9.09116e-27	3.5164e-25	ENSG00000273079	up	YES
25228.3	1.82594	0.170549	10.7062	9.51854e-27	3.67508e-25	ENSG00000165661	up	YES
4925.43	-2.23414	0.208682	-10.706	9.54212e-27	3.67757e-25	ENSG00000064652	down	YES
271.694	7.36425	0.688631	10.694	1.08534e-26	4.17545e-25	ENSG00000188064	up	YES
5036.03	-3.46121	0.323761	-10.6906	1.12586e-26	4.3236e-25	ENSG00000176472	down	YES
48.1622	4.67252	0.437324	10.6843	1.20495e-26	4.61903e-25	ENSG00000225680	up	YES
40939.7	1.76156	0.164931	10.6806	1.25492e-26	4.80204e-25	ENSG00000110104	up	YES
8415.05	2.9568	0.276863	10.6797	1.2674e-26	4.84115e-25	ENSG00000139618	up	YES
2017.79	2.38006	0.222904	10.6775	1.29693e-26	4.94513e-25	ENSG00000196550	up	YES
12502.5	-3.11784	0.292026	-10.6766	1.3102e-26	4.97805e-25	ENSG00000135437	down	YES
70672.1	2.17133	0.20337	10.6767	1.30792e-26	4.97805e-25	ENSG00000101146	up	YES
262907	2.00561	0.187906	10.6735	1.35482e-26	5.13852e-25	ENSG00000101361	up	YES
43542.1	-5.22689	0.48974	-10.6728	1.36486e-26	5.16744e-25	ENSG00000180875	down	YES
111976	-1.98515	0.186022	-10.6716	1.3823e-26	5.22428e-25	ENSG00000107738	down	YES
39396	1.57728	0.147867	10.6669	1.45384e-26	5.485e-25	ENSG00000064545	up	YES
891.131	4.4699	0.419124	10.6649	1.48614e-26	5.59702e-25	ENSG00000180914	up	YES
7264.23	3.37855	0.3169	10.6613	1.54484e-26	5.80791e-25	ENSG00000105926	up	YES
1756.11	4.9031	0.460342	10.651	1.72515e-26	6.47444e-25	ENSG00000165188	up	YES
267.843	4.36078	0.409694	10.644	1.86009e-26	6.9687e-25	ENSG00000262585	up	YES
580.481	-5.78432	0.543618	-10.6404	1.93292e-26	7.22894e-25	ENSG00000260230	down	YES
806.717	3.46228	0.325485	10.6373	1.9988e-26	7.4623e-25	ENSG00000108379	up	YES
80.4337	-5.18679	0.487616	-10.637	2.00397e-26	7.46861e-25	ENSG00000144406	down	YES
25669.2	2.95984	0.278364	10.633	2.09266e-26	7.78565e-25	ENSG00000160957	up	YES
209903	-4.95251	0.465837	-10.6314	2.12808e-26	7.90372e-25	ENSG00000135842	down	YES
1257.57	-7.3513	0.691574	-10.6298	2.16546e-26	8.02867e-25	ENSG00000120057	down	YES
29344.9	-3.75709	0.353503	-10.6282	2.20404e-26	8.1576e-25	ENSG00000167779	down	YES
80790	2.02063	0.190149	10.6265	2.24271e-26	8.28643e-25	ENSG00000089351	up	YES
89.3906	-4.05262	0.381635	-10.6191	2.42888e-26	8.95889e-25	ENSG00000159197	down	YES
91.0755	-4.98481	0.46945	-10.6184	2.44689e-26	9.00985e-25	ENSG00000204065	down	YES
120145	-3.01344	0.284048	-10.6089	2.7087e-26	9.9568e-25	ENSG00000162817	down	YES
555380	-3.38366	0.318964	-10.6083	2.7265e-26	1.00051e-24	ENSG00000187097	down	YES
1919.33	-3.81477	0.359632	-10.6074	2.7524e-26	1.00829e-24	ENSG00000180616	down	YES
4328.74	2.7256	0.256995	10.6056	2.80582e-26	1.02611e-24	ENSG00000165490	up	YES
99743	-3.26487	0.307892	-10.604	2.85637e-26	1.04282e-24	ENSG00000196502	down	YES
353256	-4.51449	0.425775	-10.603	2.88608e-26	1.05187e-24	ENSG00000004799	down	YES
348087	2.52485	0.238161	10.6014	2.93421e-26	1.0676e-24	ENSG00000136295	up	YES
281436	1.65804	0.156451	10.5979	3.04885e-26	1.10744e-24	ENSG00000168003	up	YES
430131	-2.54361	0.240104	-10.5938	3.18365e-26	1.15445e-24	ENSG00000179163	down	YES
262.565	-4.19611	0.39616	-10.592	3.24729e-26	1.17554e-24	ENSG00000129990	down	YES
23657.1	1.37657	0.12997	10.5915	3.26358e-26	1.17945e-24	ENSG00000080819	up	YES
80156.6	-7.57045	0.714868	-10.59	3.31601e-26	1.19638e-24	ENSG00000018625	down	YES
3309.58	2.88461	0.272513	10.5852	3.49006e-26	1.25707e-24	ENSG00000165891	up	YES
210.048	4.21846	0.398682	10.581	3.64982e-26	1.31241e-24	ENSG00000215866	up	YES
18310.7	-5.74092	0.54287	-10.5751	3.88686e-26	1.3953e-24	ENSG00000240498	down	YES
355033	-5.82356	0.551033	-10.5684	4.17346e-26	1.49569e-24	ENSG00000080493	down	YES
28007.1	-5.81956	0.550707	-10.5674	4.21923e-26	1.50957e-24	ENSG00000166831	down	YES
621.012	-3.88787	0.368054	-10.5633	4.40793e-26	1.57446e-24	ENSG00000103184	down	YES
77828.4	-5.98051	0.566538	-10.5562	4.75365e-26	1.69513e-24	ENSG00000059915	down	YES
707247	-6.13253	0.581156	-10.5523	4.95734e-26	1.76483e-24	ENSG00000197273	down	YES
1.22885e+06	-3.23869	0.306924	-10.5521	4.96945e-26	1.76621e-24	ENSG00000176387	down	YES
63318.3	4.78699	0.453681	10.5514	5.00244e-26	1.775e-24	ENSG00000183734	up	YES
105436	-2.93574	0.278249	-10.5508	5.03815e-26	1.78472e-24	ENSG00000057704	down	YES
16825.4	-4.1291	0.391886	-10.5365	5.86412e-26	2.07389e-24	ENSG00000186642	down	YES
1029.41	-2.60929	0.247832	-10.5284	6.38799e-26	2.25544e-24	ENSG00000145861	down	YES
86410.7	5.97681	0.567706	10.528	6.41801e-26	2.26232e-24	ENSG00000120875	up	YES
6752.36	2.02318	0.19224	10.5242	6.68254e-26	2.35171e-24	ENSG00000133627	up	YES
19823.2	1.69392	0.160959	10.5239	6.70426e-26	2.35549e-24	ENSG00000149554	up	YES
883.243	-4.88591	0.464416	-10.5206	6.946e-26	2.43643e-24	ENSG00000130037	down	YES
39661.6	1.44575	0.137443	10.5189	7.06895e-26	2.47552e-24	ENSG00000130305	up	YES
18513.5	5.61776	0.534339	10.5135	7.48721e-26	2.61772e-24	ENSG00000181577	up	YES
6069.64	1.218	0.115917	10.5075	7.97916e-26	2.78518e-24	ENSG00000144559	up	YES
166.508	4.22295	0.401912	10.5072	8.00695e-26	2.79034e-24	ENSG00000253161	up	YES
228176	-5.79063	0.551339	-10.5028	8.38144e-26	2.91612e-24	ENSG00000143196	down	YES
114002	3.42999	0.326621	10.5014	8.50943e-26	2.95586e-24	ENSG00000078114	up	YES
16738.4	1.43011	0.136248	10.4964	8.97213e-26	3.11155e-24	ENSG00000070950	up	YES
3602.71	7.7084	0.734969	10.4881	9.80174e-26	3.39377e-24	ENSG00000105048	up	YES
28961.2	3.84882	0.367097	10.4845	1.01813e-25	3.5195e-24	ENSG00000148735	up	YES
13889.2	3.58553	0.342349	10.4733	1.14586e-25	3.95469e-24	ENSG00000163032	up	YES
124742	-3.48907	0.333162	-10.4726	1.15448e-25	3.97803e-24	ENSG00000147883	down	YES
84.2731	-3.25218	0.310643	-10.4692	1.1969e-25	4.11762e-24	ENSG00000145708	down	YES
586870	-7.25987	0.694252	-10.4571	1.35922e-25	4.66853e-24	ENSG00000071203	down	YES
121.718	-4.34285	0.41552	-10.4516	1.44038e-25	4.93939e-24	ENSG00000240654	down	YES
492.795	-3.95467	0.37843	-10.4502	1.46214e-25	5.00602e-24	ENSG00000104888	down	YES
430.13	-3.89833	0.373072	-10.4493	1.47665e-25	5.04764e-24	ENSG00000092051	down	YES
2388.53	3.47582	0.332645	10.449	1.4802e-25	5.05176e-24	ENSG00000142235	up	YES
963.083	4.05195	0.387833	10.4477	1.50159e-25	5.11659e-24	ENSG00000148935	up	YES
17508.8	1.54749	0.148174	10.4437	1.56567e-25	5.31806e-24	ENSG00000111364	up	YES
3825.28	-5.13586	0.491759	-10.4439	1.5633e-25	5.31806e-24	ENSG00000171303	down	YES
53.8428	-6.94347	0.664905	-10.4428	1.58087e-25	5.36121e-24	ENSG00000204071	down	YES
26141.5	-4.1175	0.394576	-10.4353	1.71139e-25	5.7947e-24	ENSG00000065320	down	YES
138.336	-5.95771	0.570995	-10.4339	1.73577e-25	5.86801e-24	ENSG00000113327	down	YES
712483	-2.71132	0.260016	-10.4275	1.85708e-25	6.26823e-24	ENSG00000181061	down	YES
5792.7	-4.53425	0.434908	-10.4258	1.89088e-25	6.37229e-24	ENSG00000162460	down	YES
83956.3	2.41079	0.23125	10.4251	1.90542e-25	6.41124e-24	ENSG00000109084	up	YES
11071.9	2.06784	0.1984	10.4226	1.95565e-25	6.56993e-24	ENSG00000133740	up	YES
32643.6	1.61605	0.155073	10.4212	1.98404e-25	6.65489e-24	ENSG00000114767	up	YES
364.989	6.17998	0.593053	10.4206	1.99647e-25	6.68616e-24	ENSG00000226476	up	YES
52713.1	-4.39454	0.42183	-10.4178	2.05662e-25	6.87685e-24	ENSG00000154175	down	YES
398.419	6.38393	0.612839	10.417	2.0742e-25	6.92487e-24	ENSG00000129991	up	YES
523.446	-5.48988	0.527205	-10.4132	2.15902e-25	7.19684e-24	ENSG00000198650	down	YES
234.264	-4.52854	0.435026	-10.4098	2.23667e-25	7.44414e-24	ENSG00000180660	down	YES
263296	2.07568	0.199467	10.4062	2.32404e-25	7.72293e-24	ENSG00000182199	up	YES
38938.5	2.1301	0.204792	10.4013	2.44519e-25	8.11296e-24	ENSG00000146918	up	YES
10656.9	-7.03468	0.676806	-10.3939	2.64223e-25	8.75319e-24	ENSG00000166828	down	YES
31496.1	-6.75493	0.649904	-10.3937	2.64766e-25	8.75766e-24	ENSG00000136546	down	YES
86.8829	-5.14527	0.495401	-10.3861	2.86951e-25	9.47689e-24	ENSG00000270403	down	YES
243134	2.07032	0.199392	10.3832	2.95805e-25	9.73935e-24	ENSG00000188706	up	YES
445216	-4.49543	0.432953	-10.3832	2.9577e-25	9.73935e-24	ENSG00000134028	down	YES
52054.4	-5.5394	0.53358	-10.3816	3.00777e-25	9.88786e-24	ENSG00000087258	down	YES
100.051	-5.90356	0.568819	-10.3786	3.10197e-25	1.0182e-23	ENSG00000166573	down	YES
67793.8	2.25978	0.217809	10.375	3.22111e-25	1.05569e-23	ENSG00000070669	up	YES
1058.59	-4.90509	0.472823	-10.3741	3.25405e-25	1.06486e-23	ENSG00000105696	down	YES
914452	1.23168	0.118741	10.3729	3.2952e-25	1.07668e-23	ENSG00000163931	up	YES
331.898	4.11733	0.397049	10.3698	3.40129e-25	1.10966e-23	ENSG00000253414	up	YES
26018	-4.61133	0.444816	-10.3668	3.5094e-25	1.14319e-23	ENSG00000149294	down	YES
1594.58	-4.8062	0.463653	-10.3659	3.54235e-25	1.15218e-23	ENSG00000214575	down	YES
1096.61	2.72819	0.263221	10.3646	3.59076e-25	1.16616e-23	ENSG00000146858	up	YES
212855	2.61256	0.252282	10.3557	3.94282e-25	1.27856e-23	ENSG00000124766	up	YES
286214	-1.72726	0.166905	-10.3488	4.23869e-25	1.37243e-23	ENSG00000162458	down	YES
8918.31	1.58331	0.153062	10.3443	4.44316e-25	1.43647e-23	ENSG00000173588	up	YES
272670	2.32402	0.224895	10.3338	4.95461e-25	1.59941e-23	ENSG00000122034	up	YES
3283.29	-5.00956	0.484938	-10.3303	5.13957e-25	1.65662e-23	ENSG00000132915	down	YES
36019.4	1.92591	0.186457	10.329	5.20874e-25	1.67186e-23	ENSG00000079462	up	YES
31599.9	-5.76046	0.557689	-10.3292	5.20106e-25	1.67186e-23	ENSG00000205358	down	YES
12737.1	1.20463	0.116626	10.329	5.21021e-25	1.67186e-23	ENSG00000146143	up	YES
81.0879	-6.54349	0.633545	-10.3284	5.24439e-25	1.68032e-23	ENSG00000214888	down	YES
44542	1.58598	0.153561	10.328	5.26351e-25	1.68393e-23	ENSG00000080608	up	YES
161.496	-4.19436	0.406174	-10.3265	5.34672e-25	1.70801e-23	ENSG00000107295	down	YES
1102.72	-6.8038	0.659155	-10.322	5.60413e-25	1.78758e-23	ENSG00000144834	down	YES
235.457	6.72037	0.651184	10.3202	5.70805e-25	1.81802e-23	ENSG00000170369	up	YES
416.229	-4.96059	0.481132	-10.3102	6.33416e-25	2.01445e-23	ENSG00000162188	down	YES
25335.5	4.38535	0.425614	10.3036	6.78859e-25	2.15578e-23	ENSG00000009950	up	YES
87154.1	3.03652	0.294765	10.3015	6.93806e-25	2.19999e-23	ENSG00000140937	up	YES
17795.3	-3.67929	0.357337	-10.2964	7.31181e-25	2.31508e-23	ENSG00000196196	down	YES
249998	-5.87431	0.570577	-10.2954	7.39126e-25	2.33679e-23	ENSG00000152137	down	YES
18606.7	2.27431	0.220961	10.2928	7.5945e-25	2.39752e-23	ENSG00000101412	up	YES
448747	1.80922	0.175818	10.2903	7.7926e-25	2.45644e-23	ENSG00000166508	up	YES
2293.02	-2.95619	0.287478	-10.2832	8.39051e-25	2.64104e-23	ENSG00000109339	down	YES
32774.8	-3.19068	0.31031	-10.2822	8.47563e-25	2.66393e-23	ENSG00000116833	down	YES
685168	-1.30588	0.127074	-10.2766	8.98556e-25	2.82007e-23	ENSG00000266412	down	YES
28365	-6.47881	0.630851	-10.27	9.62398e-25	3.01603e-23	ENSG00000122367	down	YES
64182.3	-5.83475	0.568372	-10.2657	1.00552e-24	3.14658e-23	ENSG00000163959	down	YES
31996.8	1.59092	0.155019	10.2628	1.03676e-24	3.23961e-23	ENSG00000171453	up	YES
278549	-1.18145	0.115134	-10.2615	1.05038e-24	3.27739e-23	ENSG00000136436	down	YES
13862.9	1.96427	0.191454	10.2597	1.06988e-24	3.32857e-23	ENSG00000132436	up	YES
56515	3.93311	0.383351	10.2598	1.06907e-24	3.32857e-23	ENSG00000087116	up	YES
28931.7	1.80738	0.176294	10.2521	1.15773e-24	3.59668e-23	ENSG00000064102	up	YES
33452.2	1.50689	0.147013	10.25	1.18327e-24	3.67069e-23	ENSG00000137574	up	YES
3859.1	5.35746	0.522863	10.2464	1.22839e-24	3.80517e-23	ENSG00000163132	up	YES
139831	-5.52489	0.539501	-10.2408	1.3022e-24	4.02799e-23	ENSG00000168447	down	YES
28064.4	3.9632	0.387278	10.2335	1.40373e-24	4.3358e-23	ENSG00000158555	up	YES
104459	-4.93455	0.482235	-10.2327	1.41553e-24	4.36598e-23	ENSG00000111863	down	YES
178597	-2.26637	0.22153	-10.2306	1.44684e-24	4.45614e-23	ENSG00000149218	down	YES
18235	1.41516	0.138357	10.2283	1.48052e-24	4.55333e-23	ENSG00000102977	up	YES
554640	-4.49985	0.439962	-10.2278	1.48827e-24	4.57064e-23	ENSG00000118515	down	YES
31834.8	-4.86385	0.475676	-10.2251	1.53007e-24	4.69229e-23	ENSG00000167641	down	YES
6831.34	-3.46077	0.338756	-10.2161	1.67932e-24	5.14264e-23	ENSG00000187824	down	YES
264101	-1.95703	0.191723	-10.2076	1.83392e-24	5.60808e-23	ENSG00000198961	down	YES
760.132	2.40817	0.235943	10.2066	1.85271e-24	5.65594e-23	ENSG00000141391	up	YES
541.488	-7.03499	0.689267	-10.2065	1.85484e-24	5.65594e-23	ENSG00000080224	down	YES
7532.46	-5.66965	0.555568	-10.2052	1.88016e-24	5.72502e-23	ENSG00000129167	down	YES
4172.7	-5.20287	0.510149	-10.1987	2.0089e-24	6.10836e-23	ENSG00000105737	down	YES
2349	-4.86676	0.477263	-10.1972	2.04032e-24	6.19513e-23	ENSG00000139910	down	YES
4496.04	1.60981	0.157923	10.1936	2.11701e-24	6.4189e-23	ENSG00000167523	up	YES
268.22	-6.13007	0.601435	-10.1924	2.14409e-24	6.49185e-23	ENSG00000179520	down	YES
1482.44	3.20492	0.314912	10.1772	2.50698e-24	7.57989e-23	ENSG00000137571	up	YES
100435	-2.04082	0.200621	-10.1725	2.63052e-24	7.94226e-23	ENSG00000162407	down	YES
638.457	-2.6152	0.257198	-10.168	2.75419e-24	8.30395e-23	ENSG00000233554	down	YES
3154.2	6.32791	0.622379	10.1673	2.77491e-24	8.35469e-23	ENSG00000182747	up	YES
13008.3	2.20937	0.217414	10.1621	2.92834e-24	8.8043e-23	ENSG00000123485	up	YES
3434.36	3.48325	0.342844	10.1599	2.99501e-24	8.99215e-23	ENSG00000155265	up	YES
44106.8	1.26303	0.124356	10.1566	3.09748e-24	9.28683e-23	ENSG00000111581	up	YES
190323	2.19482	0.216125	10.1553	3.13849e-24	9.39663e-23	ENSG00000183010	up	YES
520.808	5.33608	0.52547	10.1549	3.15237e-24	9.42507e-23	ENSG00000274979	up	YES
352790	-1.43926	0.141793	-10.1504	3.29868e-24	9.8488e-23	ENSG00000159720	down	YES
1.15743e+06	2.22471	0.219201	10.1492	3.34222e-24	9.96493e-23	ENSG00000101444	up	YES
1579.05	-5.09759	0.502581	-10.1428	3.56655e-24	1.0619e-22	ENSG00000132639	down	YES
17832.7	4.84348	0.477626	10.1407	3.64314e-24	1.0832e-22	ENSG00000113739	up	YES
630204	-2.11495	0.208795	-10.1293	4.09701e-24	1.21647e-22	ENSG00000088256	down	YES
15121	-2.38153	0.235221	-10.1247	4.29484e-24	1.27344e-22	ENSG00000167705	down	YES
30.3575	-3.86299	0.381636	-10.1222	4.40481e-24	1.30425e-22	ENSG00000255085	down	YES
7047.02	2.78644	0.275316	10.1209	4.46292e-24	1.31964e-22	ENSG00000198720	up	YES
3502.75	3.52099	0.347928	10.1199	4.50905e-24	1.33144e-22	ENSG00000174939	up	YES
51279.6	-2.75842	0.272743	-10.1136	4.80842e-24	1.41594e-22	ENSG00000167074	down	YES
785.915	-3.79114	0.374851	-10.1137	4.80289e-24	1.41594e-22	ENSG00000139200	down	YES
13134.5	-4.33825	0.429056	-10.1111	4.93024e-24	1.44983e-22	ENSG00000046653	down	YES
120.321	4.4931	0.444609	10.1057	5.21081e-24	1.53024e-22	ENSG00000142408	up	YES
26736.8	-6.10809	0.604649	-10.1019	5.41931e-24	1.58929e-22	ENSG00000109182	down	YES
98145.9	-2.55887	0.253375	-10.0992	5.57202e-24	1.63185e-22	ENSG00000138744	down	YES
3599.39	-6.3972	0.633471	-10.0986	5.60117e-24	1.63815e-22	ENSG00000158445	down	YES
30151.2	-3.96858	0.393054	-10.0968	5.70943e-24	1.66754e-22	ENSG00000271447	down	YES
243668	2.15758	0.213697	10.0965	5.72716e-24	1.67045e-22	ENSG00000131747	up	YES
14640.7	2.58138	0.255675	10.0963	5.73502e-24	1.67047e-22	ENSG00000135451	up	YES
2522.55	1.74404	0.172746	10.0959	5.75768e-24	1.6748e-22	ENSG00000175711	up	YES
400128	2.66735	0.264641	10.0791	6.8338e-24	1.98513e-22	ENSG00000125398	up	YES
218.018	4.91501	0.487692	10.0781	6.90443e-24	2.00294e-22	ENSG00000232237	up	YES
24909.1	-2.53495	0.251554	-10.0771	6.97231e-24	2.0199e-22	ENSG00000183111	down	YES
12635.9	1.37809	0.136764	10.0764	7.02473e-24	2.03234e-22	ENSG00000116922	up	YES
32642.8	2.60017	0.258088	10.0747	7.14491e-24	2.06433e-22	ENSG00000276043	up	YES
5005.39	-6.21596	0.617252	-10.0704	7.4688e-24	2.15501e-22	ENSG00000144891	down	YES
379278	0.976876	0.0970825	10.0623	8.10571e-24	2.33564e-22	ENSG00000205937	up	YES
70650.2	-4.16963	0.414416	-10.0615	8.17741e-24	2.35314e-22	ENSG00000148483	down	YES
3712.89	-4.22147	0.419574	-10.0613	8.18957e-24	2.35349e-22	ENSG00000170482	down	YES
1597.04	2.56439	0.254882	10.0611	8.20867e-24	2.35582e-22	ENSG00000105982	up	YES
9537.68	2.9767	0.295962	10.0577	8.49458e-24	2.43462e-22	ENSG00000003249	up	YES
78864.7	1.70175	0.169214	10.0568	8.57364e-24	2.454e-22	ENSG00000124571	up	YES
68756.1	-3.91337	0.389331	-10.0515	9.0438e-24	2.58513e-22	ENSG00000113303	down	YES
5771.34	1.59454	0.158642	10.0511	9.08165e-24	2.5925e-22	ENSG00000156787	up	YES
4332.26	2.31233	0.230067	10.0507	9.12438e-24	2.60124e-22	ENSG00000182118	up	YES
11021.7	-5.14867	0.512325	-10.0496	9.22272e-24	2.62578e-22	ENSG00000108924	down	YES
2421.94	-4.82519	0.480169	-10.0489	9.28554e-24	2.64017e-22	ENSG00000281852	down	YES
77224.2	-3.40862	0.339319	-10.0455	9.61984e-24	2.7316e-22	ENSG00000006740	down	YES
56628.9	1.53477	0.152816	10.0433	9.83634e-24	2.78939e-22	ENSG00000168411	up	YES
629.411	7.63685	0.760802	10.0379	1.03867e-23	2.94157e-22	ENSG00000171759	up	YES
14224.4	-3.45618	0.344333	-10.0373	1.04482e-23	2.95509e-22	ENSG00000254827	down	YES
5404.38	1.38375	0.137943	10.0313	1.11089e-23	3.13783e-22	ENSG00000174206	up	YES
26594.3	1.46784	0.146348	10.0298	1.12792e-23	3.18173e-22	ENSG00000146909	up	YES
29505.6	2.02127	0.201554	10.0284	1.14359e-23	3.22172e-22	ENSG00000120526	up	YES
2358.69	-4.60504	0.459274	-10.0268	1.16262e-23	3.27103e-22	ENSG00000243064	down	YES
72379.5	4.40039	0.438904	10.0259	1.17315e-23	3.29633e-22	ENSG00000160862	up	YES
52923.4	1.40153	0.139855	10.0213	1.22862e-23	3.44769e-22	ENSG00000155438	up	YES
6196.1	5.08231	0.507386	10.0167	1.2879e-23	3.60931e-22	ENSG00000137747	up	YES
346.74	-3.74587	0.374286	-10.008	1.40501e-23	3.93238e-22	ENSG00000133878	down	YES
13222.2	4.70152	0.469991	10.0034	1.4723e-23	4.11535e-22	ENSG00000078098	up	YES
197.864	6.00014	0.599909	10.0018	1.49726e-23	4.17967e-22	ENSG00000176842	up	YES
530335	3.47059	0.34702	10.0011	1.50694e-23	4.20124e-22	ENSG00000108375	up	YES
76568.7	-7.07003	0.707246	-9.99657	1.57775e-23	4.39293e-22	ENSG00000182271	down	YES
57506.5	2.75934	0.276054	9.99564	1.59261e-23	4.42857e-22	ENSG00000183856	up	YES
39170.4	1.56132	0.156315	9.98831	1.71481e-23	4.76221e-22	ENSG00000113460	up	YES
30297.5	3.47678	0.348119	9.98732	1.73196e-23	4.80361e-22	ENSG00000276644	up	YES
1136.43	-3.55518	0.356019	-9.98595	1.75618e-23	4.86451e-22	ENSG00000129244	down	YES
22332.6	4.34509	0.43551	9.97701	1.9217e-23	5.31614e-22	ENSG00000151012	up	YES
42.5981	-3.66404	0.367256	-9.97681	1.92565e-23	5.32021e-22	ENSG00000228495	down	YES
43945.3	2.37427	0.238083	9.97246	2.0119e-23	5.55134e-22	ENSG00000255717	up	YES
272.414	6.13035	0.615131	9.96594	2.14836e-23	5.92026e-22	ENSG00000268120	up	YES
326.225	-3.30861	0.332023	-9.965	2.16881e-23	5.96897e-22	ENSG00000143340	down	YES
86348	-3.36887	0.338188	-9.96154	2.24547e-23	6.17202e-22	ENSG00000187193	down	YES
201347	-2.76186	0.277279	-9.9606	2.26688e-23	6.21495e-22	ENSG00000080031	down	YES
96279.9	1.95957	0.19673	9.96069	2.26488e-23	6.21495e-22	ENSG00000106348	up	YES
734847	1.92118	0.192886	9.96018	2.2766e-23	6.23364e-22	ENSG00000026508	up	YES
795.194	2.44277	0.245331	9.95702	2.34989e-23	6.42614e-22	ENSG00000134297	up	YES
536458	-1.81903	0.182712	-9.95569	2.38168e-23	6.50476e-22	ENSG00000172340	down	YES
694858	-2.60693	0.261867	-9.95514	2.39478e-23	6.53224e-22	ENSG00000167315	down	YES
5474.93	-6.00522	0.603674	-9.9478	2.57832e-23	7.02395e-22	ENSG00000130294	down	YES
609.837	-5.47404	0.550344	-9.94657	2.61017e-23	7.10171e-22	ENSG00000278309	down	YES
89644.6	-2.15624	0.216787	-9.94635	2.61598e-23	7.10851e-22	ENSG00000140450	down	YES
442.003	-7.17774	0.72179	-9.94436	2.66895e-23	7.24328e-22	ENSG00000153002	down	YES
32331.2	-4.16326	0.418713	-9.94297	2.70622e-23	7.33516e-22	ENSG00000179314	down	YES
2971.19	5.1782	0.520962	9.93969	2.79705e-23	7.57179e-22	ENSG00000137203	up	YES
7697.8	8.13126	0.818269	9.93715	2.86919e-23	7.7573e-22	ENSG00000280109	up	YES
231.309	4.35555	0.438316	9.93702	2.87287e-23	7.75748e-22	ENSG00000224167	up	YES
5121.87	9.60636	0.966899	9.93522	2.92522e-23	7.88892e-22	ENSG00000161798	up	YES
978794	-1.34897	0.135781	-9.93485	2.93605e-23	7.90817e-22	ENSG00000084754	down	YES
2188.26	4.61647	0.46512	9.92533	3.23022e-23	8.68961e-22	ENSG00000280693	up	YES
206360	1.98084	0.199608	9.92363	3.28581e-23	8.82811e-22	ENSG00000139146	up	YES
99104.4	1.23846	0.124915	9.91442	3.60341e-23	9.66931e-22	ENSG00000163655	up	YES
217012	-3.71811	0.375041	-9.91387	3.62331e-23	9.71057e-22	ENSG00000114455	down	YES
4762.39	-5.44532	0.549712	-9.90577	3.92944e-23	1.05179e-21	ENSG00000253701	down	YES
6115.66	2.57849	0.260376	9.90294	4.04203e-23	1.08058e-21	ENSG00000141682	up	YES
50937.7	1.55996	0.157571	9.9	4.16262e-23	1.11143e-21	ENSG00000099810	up	YES
1152.04	2.49413	0.251944	9.89954	4.18208e-23	1.11524e-21	ENSG00000215784	up	YES
19380.1	1.95485	0.197552	9.89536	4.36023e-23	1.1613e-21	ENSG00000184220	up	YES
404091	1.35516	0.13698	9.89316	4.45739e-23	1.18571e-21	ENSG00000171490	up	YES
722.06	-3.74037	0.378268	-9.88813	4.68681e-23	1.2452e-21	ENSG00000164929	down	YES
2.28919e+07	-5.49174	0.555408	-9.88775	4.70502e-23	1.24849e-21	ENSG00000132465	down	YES
11744.1	-2.60696	0.263883	-9.87923	5.12267e-23	1.35763e-21	ENSG00000139117	down	YES
39571.5	4.0381	0.408842	9.87692	5.24199e-23	1.38754e-21	ENSG00000102287	up	YES
26931.5	2.71099	0.274481	9.87677	5.24974e-23	1.38788e-21	ENSG00000196155	up	YES
98570.7	-5.24367	0.530968	-9.87569	5.30685e-23	1.40126e-21	ENSG00000119121	down	YES
545.083	5.13307	0.519898	9.87322	5.43885e-23	1.43435e-21	ENSG00000262188	up	YES
717.629	6.85782	0.695291	9.86322	6.00883e-23	1.58272e-21	ENSG00000251493	up	YES
1263.65	-3.22342	0.326847	-9.86217	6.07224e-23	1.59746e-21	ENSG00000108370	down	YES
64342.6	-2.39987	0.243524	-9.85478	6.53605e-23	1.71737e-21	ENSG00000151150	down	YES
30.9495	-5.32869	0.541105	-9.8478	7.00624e-23	1.83867e-21	ENSG00000256193	down	YES
18738.3	1.66888	0.16954	9.84357	7.30696e-23	1.91524e-21	ENSG00000164284	up	YES
708.169	3.79078	0.385151	9.84231	7.39943e-23	1.93712e-21	ENSG00000215417	up	YES
1722.61	-5.38763	0.547558	-9.83938	7.61794e-23	1.99189e-21	ENSG00000261616	down	YES
126.794	3.0131	0.306241	9.839	7.64686e-23	1.99702e-21	ENSG00000179528	up	YES
3.53387e+06	-8.12158	0.825508	-9.83828	7.70192e-23	2.00896e-21	ENSG00000133742	down	YES
159.056	-5.23253	0.531942	-9.83666	7.82671e-23	2.03903e-21	ENSG00000171094	down	YES
14260.1	-6.26899	0.637411	-9.83508	7.95049e-23	2.06877e-21	ENSG00000165966	down	YES
2149.46	-5.19957	0.528775	-9.83325	8.09658e-23	2.10423e-21	ENSG00000253250	down	YES
118826	-5.29392	0.538486	-9.83111	8.26988e-23	2.14667e-21	ENSG00000135220	down	YES
2776.78	-3.50541	0.356589	-9.83041	8.32802e-23	2.15915e-21	ENSG00000168280	down	YES
923.461	6.35141	0.646264	9.82788	8.53962e-23	2.21134e-21	ENSG00000126583	up	YES
19723.8	3.55059	0.361396	9.82466	8.81738e-23	2.28051e-21	ENSG00000117122	up	YES
1194.73	5.22605	0.531972	9.82392	8.88172e-23	2.29439e-21	ENSG00000183091	up	YES
24.6538	4.5223	0.460393	9.82268	8.99206e-23	2.3201e-21	ENSG00000253616	up	YES
5230.48	2.66124	0.270972	9.82109	9.13531e-23	2.35423e-21	ENSG00000118193	up	YES
37509.3	1.6925	0.172354	9.81988	9.24505e-23	2.37966e-21	ENSG00000106344	up	YES
1.0415e+06	-3.15334	0.32129	-9.81461	9.7418e-23	2.50452e-21	ENSG00000099834	down	YES
943.356	-5.66399	0.577295	-9.81125	1.00709e-22	2.58603e-21	ENSG00000224721	down	YES
631.816	-5.50856	0.561519	-9.81012	1.01846e-22	2.60899e-21	ENSG00000132872	down	YES
39934.7	-4.0383	0.411644	-9.81019	1.0178e-22	2.60899e-21	ENSG00000124205	down	YES
2142.7	-3.80171	0.387556	-9.80943	1.02547e-22	2.62382e-21	ENSG00000099866	down	YES
159396	1.27271	0.129752	9.80876	1.03228e-22	2.6381e-21	ENSG00000213923	up	YES
114551	1.90395	0.19433	9.79753	1.15377e-22	2.94506e-21	ENSG00000084774	up	YES
708.221	-5.20329	0.531254	-9.79436	1.19052e-22	3.03526e-21	ENSG00000053328	down	YES
5332.13	-5.90655	0.603153	-9.7928	1.20902e-22	3.07877e-21	ENSG00000071991	down	YES
5.28547e+06	-5.11727	0.52259	-9.79213	1.21708e-22	3.09562e-21	ENSG00000155850	down	YES
33572.9	-4.5228	0.461905	-9.79162	1.22315e-22	3.10738e-21	ENSG00000069535	down	YES
85.898	2.24493	0.229322	9.78941	1.25025e-22	3.17246e-21	ENSG00000213085	up	YES
2696.2	-5.01275	0.512145	-9.78776	1.27081e-22	3.22083e-21	ENSG00000123119	down	YES
3746.18	-3.79896	0.388148	-9.78741	1.27519e-22	3.22812e-21	ENSG00000134201	down	YES
6939.51	-4.0816	0.417125	-9.78509	1.30484e-22	3.29929e-21	ENSG00000133083	down	YES
8204.1	3.92341	0.400964	9.78493	1.30679e-22	3.30034e-21	ENSG00000211448	up	YES
100246	-2.59912	0.265814	-9.77795	1.40015e-22	3.53196e-21	ENSG00000164176	down	YES
5267.51	5.73016	0.586064	9.77737	1.40827e-22	3.54828e-21	ENSG00000042832	up	YES
5059.38	-1.79752	0.183854	-9.77687	1.41521e-22	3.56159e-21	ENSG00000107864	down	YES
357269	-2.72859	0.279143	-9.77489	1.44321e-22	3.62354e-21	ENSG00000109814	down	YES
296.989	-4.73236	0.484131	-9.77496	1.44214e-22	3.62354e-21	ENSG00000163499	down	YES
65609.4	1.48919	0.152369	9.77359	1.46176e-22	3.66583e-21	ENSG00000141076	up	YES
3099.47	6.37243	0.652189	9.77084	1.50208e-22	3.76257e-21	ENSG00000280178	up	YES
216.021	-3.97393	0.406804	-9.76865	1.53482e-22	3.84009e-21	ENSG00000154118	down	YES
9856.66	-2.54798	0.260858	-9.76767	1.54971e-22	3.87284e-21	ENSG00000213366	down	YES
5002.27	3.01708	0.308907	9.76695	1.56086e-22	3.89616e-21	ENSG00000186871	up	YES
801.03	-5.80662	0.594793	-9.76242	1.63214e-22	4.06936e-21	ENSG00000225986	down	YES
22.3293	-5.03407	0.515971	-9.7565	1.73019e-22	4.30881e-21	ENSG00000187758	down	YES
5978.48	2.56447	0.262987	9.75131	1.82101e-22	4.52973e-21	ENSG00000103021	up	YES
81797.4	-3.47616	0.356551	-9.7494	1.85559e-22	4.61041e-21	ENSG00000082397	down	YES
76.7841	-5.21022	0.534547	-9.74698	1.90028e-22	4.716e-21	ENSG00000230798	down	YES
91.3644	-5.41559	0.555642	-9.74654	1.90866e-22	4.73131e-21	ENSG00000067842	down	YES
3526.06	4.0455	0.415091	9.74606	1.91759e-22	4.74796e-21	ENSG00000182489	up	YES
93.3374	-3.55411	0.364697	-9.74539	1.93036e-22	4.77408e-21	ENSG00000232855	down	YES
10894.5	2.83574	0.291003	9.7447	1.9436e-22	4.8013e-21	ENSG00000163013	up	YES
652.425	6.21092	0.637453	9.74334	1.96963e-22	4.86001e-21	ENSG00000174171	up	YES
86486.3	1.50582	0.15459	9.74073	2.02097e-22	4.98097e-21	ENSG00000139496	up	YES
32084.1	1.6187	0.166188	9.74022	2.03123e-22	5.00051e-21	ENSG00000164933	up	YES
1077.75	-5.14322	0.528055	-9.73994	2.03674e-22	5.00833e-21	ENSG00000148798	down	YES
792.314	-3.9015	0.400718	-9.73626	2.11183e-22	5.18703e-21	ENSG00000162373	down	YES
1357.18	5.52758	0.567827	9.73463	2.14596e-22	5.26483e-21	ENSG00000244306	up	YES
24604	-4.28564	0.440395	-9.73134	2.21648e-22	5.43165e-21	ENSG00000172260	down	YES
163.92	-5.60714	0.576442	-9.72716	2.30961e-22	5.6534e-21	ENSG00000226629	down	YES
3978.3	3.0124	0.310109	9.71401	2.62792e-22	6.42523e-21	ENSG00000089723	up	YES
1.02367e+06	1.12464	0.115779	9.71371	2.63573e-22	6.43699e-21	ENSG00000119335	up	YES
7235.41	2.08276	0.214429	9.71307	2.65219e-22	6.46985e-21	ENSG00000169607	up	YES
614842	2.96364	0.305179	9.71117	2.70214e-22	6.5842e-21	ENSG00000136997	up	YES
2714.01	-4.96326	0.5111	-9.71094	2.70839e-22	6.59196e-21	ENSG00000172020	down	YES
785659	1.48371	0.15285	9.70697	2.81582e-22	6.84565e-21	ENSG00000197157	up	YES
314160	-5.36084	0.552425	-9.70418	2.89392e-22	7.02757e-21	ENSG00000154330	down	YES
136013	2.33728	0.240858	9.70399	2.89935e-22	7.0328e-21	ENSG00000140263	up	YES
539.78	2.87886	0.296753	9.70121	2.97934e-22	7.21867e-21	ENSG00000144395	up	YES
4816.04	-3.18009	0.327938	-9.69722	3.09837e-22	7.49861e-21	ENSG00000204136	down	YES
25973.5	-1.14136	0.117771	-9.69132	3.28246e-22	7.93519e-21	ENSG00000167220	down	YES
60.8268	4.80425	0.495837	9.68917	3.35241e-22	8.09519e-21	ENSG00000262772	up	YES
8601.31	2.52316	0.260581	9.68283	3.56707e-22	8.60386e-21	ENSG00000143228	up	YES
459180	-1.33819	0.138223	-9.68139	3.61779e-22	8.71639e-21	ENSG00000116171	down	YES
1.29002e+06	-3.57813	0.369638	-9.6801	3.66352e-22	8.81669e-21	ENSG00000166920	down	YES
107.228	-2.495	0.257748	-9.67997	3.66814e-22	8.8179e-21	ENSG00000163239	down	YES
848.274	4.34153	0.448688	9.67606	3.81131e-22	9.15184e-21	ENSG00000258227	up	YES
54144.6	1.5641	0.161662	9.67516	3.84506e-22	9.22255e-21	ENSG00000065183	up	YES
211.507	-4.59246	0.474676	-9.67494	3.85315e-22	9.23164e-21	ENSG00000183454	down	YES
8279.75	5.35507	0.553673	9.67191	3.96895e-22	9.49849e-21	ENSG00000147889	up	YES
2945.97	2.2047	0.227964	9.67123	3.99527e-22	9.55084e-21	ENSG00000056277	up	YES
12772.5	-5.49712	0.568557	-9.66855	4.10146e-22	9.79377e-21	ENSG00000158246	down	YES
17075.2	-4.6723	0.483262	-9.66825	4.11346e-22	9.81151e-21	ENSG00000104435	down	YES
102520	-1.24699	0.129004	-9.66636	4.19021e-22	9.9835e-21	ENSG00000117758	down	YES
17117.6	1.7703	0.183149	9.66591	4.20871e-22	1.00164e-20	ENSG00000137692	up	YES
99294	1.84227	0.190609	9.66516	4.23966e-22	1.00789e-20	ENSG00000114554	up	YES
13278.1	-3.45336	0.35767	-9.65515	4.67454e-22	1.11005e-20	ENSG00000168060	down	YES
128306	-1.48911	0.154283	-9.65179	4.8305e-22	1.14581e-20	ENSG00000167323	down	YES
232408	-2.1199	0.219728	-9.64787	5.01862e-22	1.18912e-20	ENSG00000136044	down	YES
237.201	-5.91093	0.612727	-9.64692	5.06544e-22	1.1989e-20	ENSG00000185149	down	YES
463.516	4.66105	0.483356	9.64311	5.25727e-22	1.24293e-20	ENSG00000125931	up	YES
27952.5	-6.34045	0.657919	-9.63714	5.57192e-22	1.31587e-20	ENSG00000135333	down	YES
4736.2	-6.14133	0.637269	-9.63695	5.58212e-22	1.31683e-20	ENSG00000170500	down	YES
328.029	-5.02702	0.521657	-9.63664	5.59894e-22	1.31935e-20	ENSG00000065609	down	YES
37425	1.4168	0.147048	9.63497	5.69091e-22	1.33955e-20	ENSG00000072864	up	YES
31383.3	2.93924	0.305066	9.63475	5.70319e-22	1.34097e-20	ENSG00000196756	up	YES
1788.4	2.17764	0.226127	9.63015	5.96434e-22	1.40084e-20	ENSG00000221944	up	YES
746.238	3.12138	0.324146	9.62955	5.99895e-22	1.40743e-20	ENSG00000197168	up	YES
158975	6.02885	0.626091	9.62935	6.0106e-22	1.40862e-20	ENSG00000140807	up	YES
1.05439e+07	-5.65318	0.587179	-9.62771	6.10772e-22	1.42826e-20	ENSG00000007306	down	YES
408156	-3.3741	0.350456	-9.62776	6.10468e-22	1.42826e-20	ENSG00000125148	down	YES
2643.87	3.78465	0.393154	9.62639	6.18632e-22	1.44507e-20	ENSG00000160183	up	YES
4560.37	5.22632	0.543044	9.62412	6.32454e-22	1.47575e-20	ENSG00000183914	up	YES
5115.97	4.00396	0.416088	9.62287	6.40214e-22	1.49223e-20	ENSG00000104415	up	YES
193912	-1.80507	0.187656	-9.61903	6.64531e-22	1.54723e-20	ENSG00000116473	down	YES
1414.16	-5.17491	0.538006	-9.6187	6.66709e-22	1.55062e-20	ENSG00000187957	down	YES
311183	-3.13335	0.325767	-9.61839	6.6868e-22	1.55352e-20	ENSG00000185432	down	YES
20.6706	-4.16978	0.43363	-9.61599	6.84485e-22	1.58852e-20	ENSG00000280061	down	YES
11411.6	-4.40908	0.458547	-9.61533	6.88896e-22	1.59703e-20	ENSG00000180155	down	YES
908604	-5.4748	0.56945	-9.61419	6.96552e-22	1.61304e-20	ENSG00000163431	down	YES
8666.28	-4.2303	0.440202	-9.6099	7.26188e-22	1.67894e-20	ENSG00000160307	down	YES
592.84	3.06187	0.318618	9.60985	7.26572e-22	1.67894e-20	ENSG00000237857	up	YES
1.09181e+06	1.91895	0.199697	9.60932	7.30263e-22	1.68565e-20	ENSG00000137309	up	YES
28146	2.31524	0.241008	9.60647	7.50755e-22	1.72923e-20	ENSG00000138180	up	YES
29669.5	1.53887	0.160191	9.60648	7.50702e-22	1.72923e-20	ENSG00000136891	up	YES
16875.3	-2.75472	0.286812	-9.60462	7.64414e-22	1.75881e-20	ENSG00000005249	down	YES
42421.9	1.5706	0.163538	9.60385	7.70157e-22	1.77012e-20	ENSG00000068438	up	YES
138.567	-5.30141	0.552045	-9.60322	7.74822e-22	1.77894e-20	ENSG00000259087	down	YES
29580.2	1.74875	0.182166	9.59976	8.01299e-22	1.83777e-20	ENSG00000104889	up	YES
29235.8	1.61789	0.168591	9.59653	8.26831e-22	1.89337e-20	ENSG00000177192	up	YES
1487.49	7.7334	0.805859	9.59647	8.27309e-22	1.89337e-20	ENSG00000177238	up	YES
8811.75	2.12691	0.221667	9.59511	8.38316e-22	1.91652e-20	ENSG00000104356	up	YES
131.281	-4.43676	0.462679	-9.58929	8.86948e-22	2.02554e-20	ENSG00000145248	down	YES
158.718	-2.477	0.258521	-9.58141	9.57281e-22	2.18384e-20	ENSG00000203739	down	YES
71662.4	-2.03262	0.212231	-9.57738	9.95371e-22	2.26833e-20	ENSG00000060762	down	YES
22.6484	-3.41677	0.35677	-9.57697	9.99371e-22	2.27503e-20	ENSG00000264016	down	YES
145583	3.15883	0.329962	9.57331	1.03539e-21	2.35453e-20	ENSG00000101057	up	YES
67.5431	-4.33622	0.452965	-9.57298	1.03869e-21	2.35954e-20	ENSG00000089169	down	YES
30913.1	-3.53664	0.369529	-9.57069	1.06198e-21	2.40734e-20	ENSG00000102886	down	YES
95.567	4.65071	0.485932	9.57072	1.06165e-21	2.40734e-20	ENSG00000237686	up	YES
4817.25	1.96731	0.205573	9.56988	1.07028e-21	2.4236e-20	ENSG00000103494	up	YES
2773.39	5.2522	0.54914	9.5644	1.12849e-21	2.55272e-20	ENSG00000206195	up	YES
127283	2.38513	0.249524	9.55873	1.19211e-21	2.69379e-20	ENSG00000138074	up	YES
1085.98	2.76087	0.288896	9.55661	1.21672e-21	2.74651e-20	ENSG00000226419	up	YES
28805.2	-4.58039	0.479383	-9.55477	1.23854e-21	2.79283e-20	ENSG00000229619	down	YES
122087	2.41286	0.252585	9.55263	1.2644e-21	2.84814e-20	ENSG00000261236	up	YES
366.026	-4.9224	0.515369	-9.55122	1.28173e-21	2.88417e-20	ENSG00000100095	down	YES
529.923	-4.51567	0.473231	-9.54222	1.39801e-21	3.14253e-20	ENSG00000176399	down	YES
206914	-1.79634	0.188271	-9.54123	1.4115e-21	3.16953e-20	ENSG00000114023	down	YES
367.908	6.7524	0.707997	9.53732	1.46565e-21	3.28769e-20	ENSG00000164076	up	YES
176635	-4.89156	0.513048	-9.53432	1.50871e-21	3.38074e-20	ENSG00000198074	down	YES
3197.99	1.62578	0.17055	9.53253	1.53498e-21	3.43601e-20	ENSG00000164953	up	YES
4840.41	-4.24739	0.445679	-9.53017	1.57027e-21	3.51136e-20	ENSG00000198300	down	YES
366224	1.83374	0.192528	9.52453	1.65783e-21	3.70329e-20	ENSG00000049449	up	YES
5509.61	-4.46887	0.469227	-9.5239	1.66806e-21	3.72227e-20	ENSG00000172318	down	YES
608175	-1.45614	0.152941	-9.5209	1.71689e-21	3.82726e-20	ENSG00000189067	down	YES
11649.3	2.41905	0.254126	9.51912	1.7465e-21	3.88923e-20	ENSG00000186185	up	YES
957419	-5.53214	0.581235	-9.51791	1.76698e-21	3.93076e-20	ENSG00000248144	down	YES
38471.2	4.76411	0.500569	9.51738	1.77594e-21	3.94658e-20	ENSG00000101144	up	YES
148.077	-4.32793	0.454954	-9.51291	1.85406e-21	4.11593e-20	ENSG00000156687	down	YES
300350	1.66176	0.174712	9.51142	1.88076e-21	4.17089e-20	ENSG00000135446	up	YES
7146.72	1.97414	0.20773	9.50339	2.03169e-21	4.50095e-20	ENSG00000126249	up	YES
493.812	-4.927	0.518557	-9.50138	2.07129e-21	4.58396e-20	ENSG00000182836	down	YES
334186	1.77437	0.186852	9.4961	2.17905e-21	4.81748e-20	ENSG00000165732	up	YES
35482.7	-3.72242	0.392025	-9.49536	2.19452e-21	4.84668e-20	ENSG00000179674	down	YES
29495.9	-2.80088	0.294978	-9.49522	2.19742e-21	4.84809e-20	ENSG00000186469	down	YES
757.715	4.99103	0.525774	9.49272	2.25078e-21	4.96074e-20	ENSG00000230061	up	YES
336.65	-4.18679	0.441232	-9.48887	2.3356e-21	5.13711e-20	ENSG00000184524	down	YES
244611	-4.4486	0.46882	-9.48893	2.33426e-21	5.13711e-20	ENSG00000095303	down	YES
3377.63	-2.2558	0.237867	-9.48345	2.46002e-21	5.40524e-20	ENSG00000076258	down	YES
65610.4	2.44497	0.257867	9.48154	2.50566e-21	5.49991e-20	ENSG00000108106	up	YES
1626.87	4.50789	0.476211	9.46615	2.90342e-21	6.36646e-20	ENSG00000023839	up	YES
31380.3	-2.39509	0.253041	-9.46521	2.92972e-21	6.41104e-20	ENSG00000088280	down	YES
66506.2	1.51294	0.159842	9.46523	2.92915e-21	6.41104e-20	ENSG00000161800	up	YES
465087	-4.2882	0.453263	-9.46074	3.05766e-21	6.6842e-20	ENSG00000124253	down	YES
2254.46	4.42695	0.468002	9.45925	3.10166e-21	6.77348e-20	ENSG00000125657	up	YES
943.335	-3.95198	0.417814	-9.45869	3.11818e-21	6.80264e-20	ENSG00000179639	down	YES
2888.04	4.10999	0.434575	9.45748	3.1544e-21	6.87467e-20	ENSG00000152669	up	YES
75706.3	1.77604	0.187954	9.44935	3.40953e-21	7.42315e-20	ENSG00000164934	up	YES
4303.91	-6.37295	0.674529	-9.448	3.4537e-21	7.51171e-20	ENSG00000248485	down	YES
46030.8	-5.34715	0.566187	-9.44415	3.58306e-21	7.78518e-20	ENSG00000106809	down	YES
960.407	2.55404	0.270552	9.44008	3.72502e-21	8.08544e-20	ENSG00000111012	up	YES
841.094	5.42596	0.574797	9.43979	3.73529e-21	8.09955e-20	ENSG00000225210	up	YES
301695	-1.4063	0.149008	-9.43774	3.80898e-21	8.25099e-20	ENSG00000100266	down	YES
1739.2	-5.57123	0.590327	-9.43753	3.81658e-21	8.25912e-20	ENSG00000170419	down	YES
928.6	-5.24407	0.555739	-9.43621	3.86509e-21	8.35568e-20	ENSG00000118298	down	YES
357.307	2.97326	0.315127	9.43512	3.90555e-21	8.43465e-20	ENSG00000281376	up	YES
49.5613	-5.59783	0.593425	-9.43308	3.98228e-21	8.59173e-20	ENSG00000187151	down	YES
3991.89	-2.43474	0.258111	-9.43291	3.98848e-21	8.59645e-20	ENSG00000165995	down	YES
2257.32	-5.7188	0.606377	-9.43111	4.05783e-21	8.73716e-20	ENSG00000144290	down	YES
59636.8	-4.93039	0.522814	-9.43049	4.08188e-21	8.78013e-20	ENSG00000146469	down	YES
59.9485	-3.07372	0.325942	-9.43026	4.09079e-21	8.78573e-20	ENSG00000280040	down	YES
90.7059	-3.68498	0.390763	-9.43021	4.09267e-21	8.78573e-20	ENSG00000152779	down	YES
8566.01	2.65105	0.281164	9.42884	4.14647e-21	8.88346e-20	ENSG00000075702	up	YES
611820	-2.4683	0.261781	-9.4289	4.14422e-21	8.88346e-20	ENSG00000090006	down	YES
21609.4	-3.88687	0.412353	-9.42606	4.25768e-21	9.11263e-20	ENSG00000137273	down	YES
27992.8	1.45339	0.154214	9.4245	4.32149e-21	9.23997e-20	ENSG00000111300	up	YES
48745.5	1.57549	0.167195	9.42309	4.3799e-21	9.35554e-20	ENSG00000151503	up	YES
827810	-2.87457	0.305167	-9.41965	4.52581e-21	9.6576e-20	ENSG00000144063	down	YES
42829.4	1.47626	0.156754	9.41772	4.61001e-21	9.82751e-20	ENSG00000113569	up	YES
8887.65	4.11724	0.437618	9.4083	5.04231e-21	1.07384e-19	ENSG00000088340	up	YES
38.5234	-3.44611	0.366337	-9.40692	5.10868e-21	1.0869e-19	ENSG00000224321	down	YES
342.444	-5.92989	0.630426	-9.40616	5.14586e-21	1.09372e-19	ENSG00000179284	down	YES
34.1205	4.00063	0.425503	9.40212	5.34754e-21	1.13547e-19	ENSG00000256540	up	YES
69793.9	5.37319	0.57173	9.39813	5.55392e-21	1.17812e-19	ENSG00000106483	up	YES
3932.93	-6.52665	0.694703	-9.39487	5.72862e-21	1.21398e-19	ENSG00000184905	down	YES
408.935	-3.66057	0.389662	-9.39422	5.76428e-21	1.22033e-19	ENSG00000160460	down	YES
2384.79	-3.76844	0.40146	-9.38683	6.18332e-21	1.30776e-19	ENSG00000144712	down	YES
337830	-3.24335	0.345576	-9.38533	6.27172e-21	1.32515e-19	ENSG00000125775	down	YES
120007	-1.89917	0.202426	-9.38203	6.47169e-21	1.36605e-19	ENSG00000157184	down	YES
78.9169	-6.31631	0.673559	-9.37751	6.75489e-21	1.42443e-19	ENSG00000177108	down	YES
31039.2	-5.67495	0.605461	-9.37295	7.05349e-21	1.48594e-19	ENSG00000121577	down	YES
27026	1.97231	0.210433	9.37264	7.07388e-21	1.48877e-19	ENSG00000106462	up	YES
363.518	5.88169	0.627657	9.37087	7.19375e-21	1.51252e-19	ENSG00000187556	up	YES
37706.6	0.867597	0.0926025	9.36905	7.31895e-21	1.53734e-19	ENSG00000124383	up	YES
779646	-2.3549	0.251491	-9.36374	7.69595e-21	1.61495e-19	ENSG00000128311	down	YES
14485.2	1.38279	0.147686	9.36298	7.75205e-21	1.62513e-19	ENSG00000130299	up	YES
4237.35	-3.79636	0.405483	-9.36255	7.7835e-21	1.63013e-19	ENSG00000112175	down	YES
75006.4	1.36733	0.146064	9.36118	7.88495e-21	1.64977e-19	ENSG00000083520	up	YES
42656.4	1.8354	0.1961	9.35948	8.01292e-21	1.67491e-19	ENSG00000101407	up	YES
18166	-4.91718	0.525468	-9.35771	8.1487e-21	1.70164e-19	ENSG00000138944	down	YES
3803.52	-4.256	0.455107	-9.35165	8.62907e-21	1.8002e-19	ENSG00000189367	down	YES
6490.27	4.71028	0.504159	9.34284	9.37845e-21	1.95463e-19	ENSG00000204335	up	YES
49131.5	1.52741	0.163516	9.34104	9.53932e-21	1.98431e-19	ENSG00000103148	up	YES
42018.7	1.53537	0.164368	9.34105	9.53804e-21	1.98431e-19	ENSG00000157827	up	YES
5.90605e+06	-5.19923	0.55674	-9.3387	9.7526e-21	2.02671e-19	ENSG00000065534	down	YES
60549.3	2.81553	0.301525	9.33763	9.85108e-21	2.0452e-19	ENSG00000127418	up	YES
94723.8	-2.66497	0.285437	-9.33645	9.96154e-21	2.06613e-19	ENSG00000100307	down	YES
10783.4	4.91624	0.526706	9.33394	1.02009e-20	2.11373e-19	ENSG00000005001	up	YES
7195.96	-2.53438	0.271562	-9.33258	1.03325e-20	2.13895e-19	ENSG00000077943	down	YES
16567.8	-3.55172	0.38058	-9.3324	1.03505e-20	2.1406e-19	ENSG00000232070	down	YES
217.036	6.37361	0.683114	9.33023	1.05639e-20	2.18264e-19	ENSG00000126778	up	YES
5420.77	-2.82267	0.302575	-9.32884	1.07037e-20	2.20939e-19	ENSG00000182168	down	YES
252166	-5.69594	0.610709	-9.32676	1.09161e-20	2.25107e-19	ENSG00000196616	down	YES
63838.9	-2.86197	0.307005	-9.32223	1.13921e-20	2.34698e-19	ENSG00000076555	down	YES
36655	1.3614	0.146113	9.31742	1.19203e-20	2.45342e-19	ENSG00000130810	up	YES
279.152	5.1024	0.547629	9.31726	1.19382e-20	2.45477e-19	ENSG00000141316	up	YES
25467.1	2.84868	0.305778	9.31618	1.20599e-20	2.47742e-19	ENSG00000232956	up	YES
527614	-5.27699	0.566494	-9.31518	1.21749e-20	2.49864e-19	ENSG00000166869	down	YES
114.723	-5.53771	0.594519	-9.31461	1.22397e-20	2.50955e-19	ENSG00000196361	down	YES
69776.9	1.55499	0.166969	9.31302	1.24251e-20	2.54513e-19	ENSG00000119285	up	YES
642.818	7.38011	0.792515	9.31227	1.25131e-20	2.56071e-19	ENSG00000238133	up	YES
261.076	-3.26725	0.350903	-9.31097	1.2667e-20	2.58973e-19	ENSG00000263400	down	YES
62357.9	-0.947132	0.10176	-9.30756	1.30808e-20	2.6718e-19	ENSG00000138942	down	YES
874.209	-8.12554	0.873047	-9.3071	1.31369e-20	2.68071e-19	ENSG00000182816	down	YES
666.122	3.84171	0.413086	9.30001	1.40428e-20	2.86283e-19	ENSG00000158023	up	YES
119536	-1.2569	0.135205	-9.29629	1.45433e-20	2.96206e-19	ENSG00000115993	down	YES
98442.1	-5.43527	0.585125	-9.28908	1.55628e-20	3.1667e-19	ENSG00000145936	down	YES
35258.5	-1.9005	0.204614	-9.28819	1.56938e-20	3.19033e-19	ENSG00000114698	down	YES
94.5362	-5.60632	0.60366	-9.28721	1.5838e-20	3.21659e-19	ENSG00000268555	down	YES
659599	-1.36057	0.146501	-9.28708	1.58583e-20	3.21768e-19	ENSG00000129250	down	YES
177.126	-2.82605	0.304307	-9.28685	1.58918e-20	3.22143e-19	ENSG00000244607	down	YES
631620	1.53159	0.164985	9.28321	1.64448e-20	3.33039e-19	ENSG00000106263	up	YES
8801.87	1.58563	0.170841	9.28128	1.67458e-20	3.38815e-19	ENSG00000248919	up	YES
442.968	4.13976	0.446256	9.27666	1.74869e-20	3.53476e-19	ENSG00000100625	up	YES
121.475	-5.95882	0.642514	-9.27422	1.78918e-20	3.61321e-19	ENSG00000177511	down	YES
1.37189e+07	-5.43563	0.586234	-9.27211	1.82494e-20	3.68195e-19	ENSG00000101335	down	YES
1800.29	2.43496	0.262682	9.2696	1.86849e-20	3.76629e-19	ENSG00000280734	up	YES
103830	-4.39771	0.474515	-9.2678	1.90031e-20	3.82682e-19	ENSG00000165410	down	YES
35223.2	-2.55278	0.275505	-9.26582	1.93584e-20	3.89473e-19	ENSG00000275688	down	YES
25141.7	1.85345	0.200111	9.26211	2.00424e-20	4.02857e-19	ENSG00000149636	up	YES
2203.22	-5.49846	0.593756	-9.26047	2.03534e-20	4.08724e-19	ENSG00000233670	down	YES
35407.2	2.03976	0.220279	9.25989	2.04645e-20	4.10572e-19	ENSG00000146670	up	YES
631.846	-3.27066	0.353278	-9.25804	2.08229e-20	4.17277e-19	ENSG00000153253	down	YES
259118	-1.99194	0.21516	-9.25796	2.08376e-20	4.17277e-19	ENSG00000215193	down	YES
262.947	3.05575	0.33036	9.24975	2.25024e-20	4.50194e-19	ENSG00000186862	up	YES
3554.71	-3.75829	0.406467	-9.24625	2.32499e-20	4.64716e-19	ENSG00000158887	down	YES
2956.14	-2.72661	0.294898	-9.24594	2.33178e-20	4.6564e-19	ENSG00000177098	down	YES
758.207	-5.15767	0.557856	-9.24552	2.34092e-20	4.66849e-19	ENSG00000092009	down	YES
261215	3.60667	0.390101	9.24547	2.34218e-20	4.66849e-19	ENSG00000168646	up	YES
548.133	-2.32956	0.251978	-9.24508	2.35073e-20	4.68118e-19	ENSG00000131409	down	YES
109544	-3.37278	0.364828	-9.24485	2.35569e-20	4.68671e-19	ENSG00000092421	down	YES
22737.2	1.58619	0.171608	9.24306	2.39544e-20	4.76138e-19	ENSG00000132952	up	YES
42226.6	-4.77834	0.51713	-9.24011	2.4624e-20	4.88994e-19	ENSG00000141052	down	YES
68646.4	-9.77728	1.05821	-9.23941	2.47851e-20	4.91739e-19	ENSG00000172410	down	YES
366566	-3.72926	0.403647	-9.23892	2.49005e-20	4.93572e-19	ENSG00000105974	down	YES
855.996	-5.08042	0.550158	-9.23447	2.59567e-20	5.14034e-19	ENSG00000050030	down	YES
163.122	5.32049	0.576184	9.23401	2.60696e-20	5.15319e-19	ENSG00000234602	up	YES
19438.9	1.61687	0.175099	9.23407	2.60539e-20	5.15319e-19	ENSG00000132330	up	YES
153777	-2.44837	0.265196	-9.23232	2.64834e-20	5.23017e-19	ENSG00000155545	down	YES
67857.3	4.01769	0.435234	9.2311	2.67864e-20	5.28515e-19	ENSG00000142102	up	YES
20606.5	1.9818	0.214807	9.22598	2.80988e-20	5.53901e-19	ENSG00000006634	up	YES
39152.8	-1.07492	0.116516	-9.22552	2.82176e-20	5.55731e-19	ENSG00000162852	down	YES
1917.41	-8.80325	0.954382	-9.22404	2.86121e-20	5.62985e-19	ENSG00000167916	down	YES
5964.43	1.44103	0.156245	9.22294	2.89061e-20	5.68248e-19	ENSG00000138050	up	YES
140955	-3.47188	0.376668	-9.21737	3.04482e-20	5.98017e-19	ENSG00000156298	down	YES
60041.2	-3.59118	0.389693	-9.2154	3.10127e-20	6.08547e-19	ENSG00000168903	down	YES
1011.69	-3.3793	0.366745	-9.2143	3.13316e-20	6.14242e-19	ENSG00000267532	down	YES
90.3425	-3.26732	0.354775	-9.20956	3.27463e-20	6.41392e-19	ENSG00000162398	down	YES
235.94	-2.90206	0.315227	-9.20627	3.37667e-20	6.60774e-19	ENSG00000157445	down	YES
49549.3	1.15533	0.125524	9.20405	3.44704e-20	6.7393e-19	ENSG00000166526	up	YES
14255	2.03051	0.22066	9.20198	3.514e-20	6.86398e-19	ENSG00000186767	up	YES
318781	1.74215	0.189355	9.20046	3.56426e-20	6.95581e-19	ENSG00000106397	up	YES
42710.3	-0.913359	0.0992787	-9.19995	3.58119e-20	6.98252e-19	ENSG00000120029	down	YES
417.785	4.86124	0.528564	9.19707	3.67851e-20	7.16576e-19	ENSG00000196711	up	YES
30535.9	2.02046	0.219695	9.19665	3.69279e-20	7.18704e-19	ENSG00000204899	up	YES
7316.64	1.52634	0.165971	9.19642	3.70087e-20	7.19626e-19	ENSG00000152455	up	YES
548945	-1.39511	0.151703	-9.19631	3.70439e-20	7.19658e-19	ENSG00000073578	down	YES
2482.37	2.5437	0.276719	9.19239	3.84217e-20	7.4575e-19	ENSG00000113356	up	YES
715781	2.1257	0.231276	9.19119	3.88527e-20	7.53434e-19	ENSG00000163191	up	YES
396080	-2.09196	0.22771	-9.18694	4.04177e-20	7.83075e-19	ENSG00000125648	down	YES
285413	1.12908	0.122952	9.18314	4.18699e-20	8.10478e-19	ENSG00000146223	up	YES
3868.55	-4.23278	0.461007	-9.18159	4.24788e-20	8.20786e-19	ENSG00000018236	down	YES
7655.32	1.38514	0.15086	9.18162	4.24659e-20	8.20786e-19	ENSG00000144161	up	YES
713.213	-5.39802	0.587992	-9.18044	4.29346e-20	8.28846e-19	ENSG00000121871	down	YES
39174	-2.39667	0.261121	-9.1784	4.37545e-20	8.43916e-19	ENSG00000135709	down	YES
2547.66	-5.63744	0.614308	-9.1769	4.43687e-20	8.54994e-19	ENSG00000155816	down	YES
31960.8	1.99258	0.217192	9.17426	4.54673e-20	8.75378e-19	ENSG00000077348	up	YES
275125	-2.19864	0.239677	-9.17334	4.58577e-20	8.82104e-19	ENSG00000165806	down	YES
18290.8	-6.73879	0.734713	-9.172	4.64332e-20	8.92374e-19	ENSG00000150625	down	YES
5.36246e+06	-3.55118	0.387499	-9.16436	4.98402e-20	9.56993e-19	ENSG00000171431	down	YES
56492.6	-1.40814	0.1537	-9.16157	5.11461e-20	9.81191e-19	ENSG00000055211	down	YES
4078.03	1.97779	0.215883	9.1614	5.12274e-20	9.81873e-19	ENSG00000121621	up	YES
206904	-4.64508	0.50716	-9.159	5.2381e-20	1.00309e-18	ENSG00000072163	down	YES
113.748	-4.969	0.54259	-9.15794	5.28992e-20	1.01211e-18	ENSG00000146352	down	YES
46201.4	-3.14351	0.34344	-9.153	5.5372e-20	1.05848e-18	ENSG00000099139	down	YES
25643.1	2.07524	0.226762	9.15161	5.60893e-20	1.07124e-18	ENSG00000142945	up	YES
1.74068e+07	4.07878	0.445896	9.14739	5.8326e-20	1.11296e-18	ENSG00000108821	up	YES
77398.9	0.953134	0.104223	9.14518	5.95297e-20	1.13492e-18	ENSG00000030066	up	YES
7480.91	1.25565	0.137469	9.13408	6.59633e-20	1.25646e-18	ENSG00000107443	up	YES
16831.8	1.98277	0.217116	9.13231	6.70502e-20	1.27603e-18	ENSG00000168005	up	YES
95582.7	-2.84775	0.311873	-9.13111	6.77974e-20	1.28911e-18	ENSG00000040199	down	YES
48765.1	1.96452	0.215174	9.12991	6.8559e-20	1.30244e-18	ENSG00000140525	up	YES
11765.4	-6.51602	0.713968	-9.12649	7.07543e-20	1.34276e-18	ENSG00000196660	down	YES
29617.2	2.79471	0.306225	9.12632	7.08689e-20	1.34276e-18	ENSG00000101003	up	YES
596.696	-5.56456	0.609722	-9.12638	7.08265e-20	1.34276e-18	ENSG00000264230	down	YES
21381.4	-1.16557	0.127766	-9.12267	7.32976e-20	1.38755e-18	ENSG00000169762	down	YES
160.561	-4.10714	0.45023	-9.12233	7.35274e-20	1.39067e-18	ENSG00000205002	down	YES
4077.84	-4.8867	0.536193	-9.11369	7.96251e-20	1.50468e-18	ENSG00000153446	down	YES
77521.4	1.93011	0.211815	9.11226	8.06868e-20	1.5234e-18	ENSG00000159216	up	YES
65.2554	-3.12135	0.342634	-9.10987	8.24822e-20	1.55593e-18	ENSG00000261469	down	YES
97803.7	-2.73332	0.300079	-9.10864	8.34212e-20	1.57226e-18	ENSG00000119138	down	YES
41579.7	2.3823	0.261593	9.10691	8.47651e-20	1.59619e-18	ENSG00000141738	up	YES
22573.9	2.25574	0.247795	9.10322	8.76945e-20	1.6499e-18	ENSG00000127564	up	YES
1837.08	1.32768	0.145852	9.10288	8.79676e-20	1.65359e-18	ENSG00000264538	up	YES
1666.9	5.61595	0.616997	9.10207	8.86273e-20	1.66453e-18	ENSG00000112494	up	YES
178.963	-4.47754	0.492204	-9.09691	9.29341e-20	1.74389e-18	ENSG00000146090	down	YES
88904.2	1.50118	0.165029	9.09649	9.33003e-20	1.74924e-18	ENSG00000006625	up	YES
12383.8	0.905084	0.0995123	9.09519	9.44189e-20	1.76867e-18	ENSG00000117262	up	YES
2.38653e+06	-1.41628	0.15582	-9.08923	9.97403e-20	1.86672e-18	ENSG00000198668	down	YES
976.694	2.0174	0.221969	9.08865	1.00278e-19	1.87514e-18	ENSG00000172244	up	YES
10808.6	1.91837	0.211084	9.0882	1.00692e-19	1.88124e-18	ENSG00000068489	up	YES
4733.1	3.3154	0.364826	9.08762	1.01232e-19	1.8897e-18	ENSG00000225614	up	YES
72878.6	1.38834	0.152806	9.08569	1.03047e-19	1.9219e-18	ENSG00000164818	up	YES
5038.97	-4.14186	0.455907	-9.08489	1.03807e-19	1.93441e-18	ENSG00000171714	down	YES
23840.3	-1.49522	0.164644	-9.08154	1.07052e-19	1.99314e-18	ENSG00000067836	down	YES
73521.2	2.84883	0.31374	9.08021	1.08361e-19	2.01576e-18	ENSG00000011347	up	YES
7.07303e+06	-4.15567	0.45788	-9.07589	1.12753e-19	2.09383e-18	ENSG00000159176	down	YES
356155	1.73731	0.19142	9.07593	1.12707e-19	2.09383e-18	ENSG00000125977	up	YES
2204.67	-4.34454	0.478719	-9.07534	1.13324e-19	2.10261e-18	ENSG00000123570	down	YES
805.99	-5.82881	0.642326	-9.07454	1.14162e-19	2.11633e-18	ENSG00000162631	down	YES
570.047	6.87972	0.758525	9.06986	1.19169e-19	2.20726e-18	ENSG00000184937	up	YES
61348.1	-1.80803	0.199386	-9.06803	1.2119e-19	2.24274e-18	ENSG00000115129	down	YES
21277.1	1.47767	0.163053	9.06251	1.27477e-19	2.35706e-18	ENSG00000184162	up	YES
436.679	-3.46024	0.381988	-9.05849	1.32271e-19	2.4436e-18	ENSG00000139364	down	YES
9374.06	-1.60723	0.177444	-9.05766	1.33277e-19	2.46007e-18	ENSG00000280798	down	YES
9993.2	-3.43062	0.378843	-9.05551	1.35931e-19	2.50689e-18	ENSG00000134121	down	YES
92.6985	-4.80424	0.530616	-9.05408	1.37728e-19	2.53786e-18	ENSG00000162761	down	YES
171.808	-7.40732	0.818166	-9.05356	1.38381e-19	2.54771e-18	ENSG00000256518	down	YES
12071.7	-3.55456	0.392629	-9.05325	1.38779e-19	2.55284e-18	ENSG00000235288	down	YES
46366.1	2.3084	0.255016	9.05198	1.40404e-19	2.58052e-18	ENSG00000087586	up	YES
207516	-3.54613	0.391775	-9.05144	1.41095e-19	2.59101e-18	ENSG00000107562	down	YES
619.808	7.0044	0.773909	9.05068	1.42081e-19	2.60688e-18	ENSG00000140835	up	YES
96.951	3.29227	0.363885	9.04756	1.46193e-19	2.68003e-18	ENSG00000108813	up	YES
86196.3	4.20675	0.465041	9.04597	1.48346e-19	2.71719e-18	ENSG00000139292	up	YES
65905.9	-1.453	0.160679	-9.04286	1.52628e-19	2.79323e-18	ENSG00000137486	down	YES
1920.58	2.33121	0.25782	9.04199	1.53851e-19	2.81321e-18	ENSG00000085465	up	YES
421293	2.42645	0.268394	9.04063	1.55772e-19	2.84592e-18	ENSG00000214078	up	YES
33696.3	1.31755	0.145799	9.03676	1.61384e-19	2.94594e-18	ENSG00000135632	up	YES
780.044	3.20505	0.354837	9.03246	1.67848e-19	3.06133e-18	ENSG00000049192	up	YES
146.859	3.5423	0.392308	9.02938	1.72644e-19	3.14614e-18	ENSG00000238062	up	YES
221.37	-5.5037	0.609638	-9.02781	1.75148e-19	3.18907e-18	ENSG00000184908	down	YES
7845.34	-2.53267	0.280572	-9.02681	1.76741e-19	3.21534e-18	ENSG00000137070	down	YES
1507.3	-2.23829	0.247966	-9.0266	1.77088e-19	3.21893e-18	ENSG00000154678	down	YES
9310.65	1.91931	0.212689	9.02402	1.81307e-19	3.29283e-18	ENSG00000083635	up	YES
6903.86	1.92309	0.213225	9.01906	1.89702e-19	3.44238e-18	ENSG00000163507	up	YES
306420	5.39352	0.59859	9.01037	2.05354e-19	3.72325e-18	ENSG00000118785	up	YES
290.203	-5.24885	0.582643	-9.0087	2.08518e-19	3.77743e-18	ENSG00000225731	down	YES
4102.62	-4.10638	0.456054	-9.00416	2.17316e-19	3.93349e-18	ENSG00000168229	down	YES
22621.3	-1.33377	0.148185	-9.0007	2.24273e-19	4.05599e-18	ENSG00000157045	down	YES
575.806	6.7357	0.748454	8.99948	2.26794e-19	4.09813e-18	ENSG00000137745	up	YES
555.001	3.25827	0.362199	8.9958	2.34518e-19	4.23415e-18	ENSG00000197472	up	YES
1747.21	1.98339	0.220489	8.99543	2.3531e-19	4.24487e-18	ENSG00000197696	up	YES
48214.5	1.00322	0.111563	8.99241	2.41864e-19	4.35943e-18	ENSG00000119203	up	YES
22853.3	1.31768	0.146555	8.99105	2.44884e-19	4.41018e-18	ENSG00000157212	up	YES
707.204	1.7758	0.197531	8.98997	2.47303e-19	4.45001e-18	ENSG00000260942	up	YES
2002.89	2.92681	0.325623	8.98833	2.51023e-19	4.51316e-18	ENSG00000164620	up	YES
40691.7	-6.03734	0.671899	-8.98548	2.57601e-19	4.62755e-18	ENSG00000164107	down	YES
73421.4	-1.67264	0.186193	-8.98335	2.62649e-19	4.71429e-18	ENSG00000165406	down	YES
45.6483	5.30139	0.5902	8.98236	2.6502e-19	4.75286e-18	ENSG00000225187	up	YES
5638.68	2.0195	0.224917	8.97888	2.73541e-19	4.90159e-18	ENSG00000138346	up	YES
460549	1.4436	0.160806	8.97729	2.7753e-19	4.96893e-18	ENSG00000189091	up	YES
174532	5.58514	0.62228	8.97528	2.82629e-19	5.05599e-18	ENSG00000196611	up	YES
151.984	3.95042	0.440406	8.96995	2.96648e-19	5.30236e-18	ENSG00000139547	up	YES
22272.3	1.77862	0.198323	8.96829	3.01167e-19	5.37866e-18	ENSG00000184445	up	YES
1232.37	-4.93555	0.550403	-8.96717	3.04242e-19	5.42906e-18	ENSG00000116748	down	YES
1945.73	-5.54917	0.618993	-8.96484	3.10739e-19	5.5404e-18	ENSG00000104833	down	YES
1.14246e+06	-4.48033	0.499885	-8.96272	3.16772e-19	5.64328e-18	ENSG00000077157	down	YES
5224.1	-4.3712	0.487984	-8.95768	3.31568e-19	5.90197e-18	ENSG00000132563	down	YES
97876.2	-3.56394	0.397913	-8.95658	3.34891e-19	5.95617e-18	ENSG00000158125	down	YES
17345.4	1.54369	0.172411	8.9535	3.444e-19	6.12022e-18	ENSG00000185238	up	YES
28877.1	1.1048	0.123411	8.95219	3.48484e-19	6.18768e-18	ENSG00000165526	up	YES
31244.9	2.17392	0.242856	8.95151	3.50664e-19	6.22124e-18	ENSG00000197961	up	YES
39647.2	1.38587	0.154838	8.95044	3.5406e-19	6.27631e-18	ENSG00000163516	up	YES
2.85683e+06	-5.69423	0.636223	-8.95005	3.55325e-19	6.29353e-18	ENSG00000128591	down	YES
145.107	2.66257	0.297506	8.94963	3.56662e-19	6.312e-18	ENSG00000236015	up	YES
2243.64	2.02681	0.226508	8.94808	3.61706e-19	6.39599e-18	ENSG00000125319	up	YES
5739.96	-5.33339	0.596158	-8.94628	3.6768e-19	6.49628e-18	ENSG00000163710	down	YES
31734.6	2.4027	0.268594	8.94545	3.70445e-19	6.53976e-18	ENSG00000090889	up	YES
10487.8	1.94139	0.217091	8.94274	3.79633e-19	6.69645e-18	ENSG00000146263	up	YES
60.6651	-4.00466	0.447885	-8.94127	3.84722e-19	6.78066e-18	ENSG00000154975	down	YES
134.511	-3.82428	0.427755	-8.94035	3.87936e-19	6.83168e-18	ENSG00000113396	down	YES
17566.8	2.12977	0.238337	8.93596	4.03658e-19	7.10273e-18	ENSG00000117650	up	YES
23502.4	1.07978	0.12085	8.93491	4.07501e-19	7.16447e-18	ENSG00000181220	up	YES
71933.3	5.16111	0.577843	8.93168	4.19592e-19	7.37101e-18	ENSG00000206075	up	YES
4411.21	6.73366	0.753992	8.93068	4.23407e-19	7.43195e-18	ENSG00000134757	up	YES
131948	-5.27584	0.591069	-8.92593	4.41984e-19	7.75169e-18	ENSG00000198523	down	YES
2.66548e+06	-5.65069	0.63321	-8.92388	4.50243e-19	7.8901e-18	ENSG00000172403	down	YES
3096.39	-6.03484	0.676459	-8.92123	4.61145e-19	8.07454e-18	ENSG00000141639	down	YES
14761.7	1.4936	0.167536	8.91511	4.87321e-19	8.52594e-18	ENSG00000120158	up	YES
174876	-1.1461	0.12856	-8.91488	4.88331e-19	8.53665e-18	ENSG00000120063	down	YES
704.458	-4.61222	0.517567	-8.91134	5.04192e-19	8.80674e-18	ENSG00000166405	down	YES
33875.2	-4.32183	0.485436	-8.90299	5.43632e-19	9.48792e-18	ENSG00000137094	down	YES
170721	1.23271	0.138463	8.90284	5.44353e-19	9.4928e-18	ENSG00000138385	up	YES
27424.7	-4.39357	0.493643	-8.90028	5.57058e-19	9.70647e-18	ENSG00000146039	down	YES
41122.6	-2.22157	0.249637	-8.89918	5.62608e-19	9.79522e-18	ENSG00000176894	down	YES
240457	-2.60721	0.292993	-8.89856	5.65748e-19	9.8419e-18	ENSG00000142875	down	YES
13620	1.85706	0.208777	8.89493	5.84584e-19	1.01613e-17	ENSG00000155100	up	YES
3387	-3.58753	0.403406	-8.89309	5.94307e-19	1.0322e-17	ENSG00000185437	down	YES
1.33669e+06	-3.37841	0.379989	-8.89082	6.06575e-19	1.05265e-17	ENSG00000233041	down	YES
15542.4	1.60344	0.180376	8.88945	6.14125e-19	1.0649e-17	ENSG00000173145	up	YES
87763.5	-1.56217	0.175749	-8.88866	6.18494e-19	1.07161e-17	ENSG00000122490	down	YES
46448.1	1.1363	0.12789	8.88502	6.39094e-19	1.10641e-17	ENSG00000136875	up	YES
3995.63	1.75135	0.197206	8.88083	6.63647e-19	1.14799e-17	ENSG00000186638	up	YES
330.657	-5.29225	0.59604	-8.87902	6.74515e-19	1.16585e-17	ENSG00000157703	down	YES
40451.5	2.17196	0.244643	8.87806	6.80379e-19	1.17504e-17	ENSG00000129667	up	YES
175162	2.09162	0.235625	8.87689	6.87542e-19	1.18645e-17	ENSG00000120685	up	YES
374562	-3.44269	0.387843	-8.87652	6.89828e-19	1.18944e-17	ENSG00000160408	down	YES
19867.7	1.89187	0.213194	8.87393	7.0609e-19	1.2165e-17	ENSG00000102595	up	YES
2962.4	1.64207	0.185099	8.8713	7.23001e-19	1.24464e-17	ENSG00000234072	up	YES
146662	1.1977	0.135148	8.86212	7.85089e-19	1.35044e-17	ENSG00000071462	up	YES
81.3847	3.31669	0.374338	8.86015	7.99065e-19	1.37338e-17	ENSG00000092607	up	YES
195.334	2.1136	0.238567	8.85954	8.03449e-19	1.37981e-17	ENSG00000269399	up	YES
115.629	-4.45567	0.502954	-8.85899	8.07401e-19	1.38549e-17	ENSG00000213424	down	YES
67.1198	-4.26196	0.481116	-8.85848	8.11102e-19	1.39073e-17	ENSG00000233760	down	YES
175540	-5.20449	0.587524	-8.85836	8.12019e-19	1.39119e-17	ENSG00000181541	down	YES
91457	1.14186	0.12891	8.85782	8.15913e-19	1.39675e-17	ENSG00000106638	up	YES
318883	1.54454	0.174401	8.85627	8.27354e-19	1.4152e-17	ENSG00000196305	up	YES
112764	-1.49552	0.168902	-8.85437	8.41613e-19	1.43845e-17	ENSG00000198160	down	YES
79547.3	1.02059	0.11527	8.85396	8.44696e-19	1.44257e-17	ENSG00000196363	up	YES
77410.8	-1.9249	0.217576	-8.84702	8.9887e-19	1.53387e-17	ENSG00000069974	down	YES
743309	-1.41437	0.15988	-8.84645	9.03449e-19	1.54046e-17	ENSG00000100412	down	YES
248159	1.36793	0.154639	8.84595	9.07512e-19	1.54615e-17	ENSG00000112118	up	YES
141053	1.10897	0.125389	8.84424	9.2156e-19	1.56885e-17	ENSG00000100029	up	YES
13001.3	1.66088	0.187893	8.8395	9.61474e-19	1.6355e-17	ENSG00000160813	up	YES
372.582	2.22637	0.252221	8.82706	1.07468e-18	1.82661e-17	ENSG00000234062	up	YES
640464	3.86357	0.437825	8.82447	1.09981e-18	1.86785e-17	ENSG00000182492	up	YES
3469.22	2.59778	0.294401	8.82396	1.10477e-18	1.87479e-17	ENSG00000102384	up	YES
13331.9	1.48772	0.168618	8.82301	1.11427e-18	1.88942e-17	ENSG00000196236	up	YES
199.881	-5.02857	0.56996	-8.82266	1.11771e-18	1.89376e-17	ENSG00000157851	down	YES
39923.5	1.12666	0.127724	8.82111	1.13334e-18	1.91872e-17	ENSG00000048991	up	YES
12003.8	-3.65533	0.414443	-8.81987	1.14596e-18	1.93855e-17	ENSG00000143603	down	YES
1509.19	-3.02001	0.342622	-8.81442	1.20305e-18	2.03353e-17	ENSG00000105290	down	YES
10833.6	2.59968	0.294987	8.81287	1.21982e-18	2.06026e-17	ENSG00000188372	up	YES
41035.4	-2.62635	0.298057	-8.81158	1.23395e-18	2.08249e-17	ENSG00000131781	down	YES
324977	-1.15016	0.130562	-8.80927	1.2596e-18	2.1241e-17	ENSG00000067182	down	YES
91.0054	-2.84052	0.322479	-8.8084	1.26949e-18	2.1391e-17	ENSG00000170214	down	YES
18910.2	5.83048	0.661931	8.80829	1.27074e-18	2.13953e-17	ENSG00000214049	up	YES
5140.39	-4.51927	0.51313	-8.80727	1.28235e-18	2.15738e-17	ENSG00000048462	down	YES
23474	3.19669	0.362999	8.80632	1.29322e-18	2.17397e-17	ENSG00000158352	up	YES
123162	-1.32989	0.151035	-8.80517	1.30658e-18	2.1947e-17	ENSG00000123091	down	YES
46291.9	-1.73767	0.197358	-8.80466	1.31252e-18	2.20296e-17	ENSG00000133424	down	YES
9180.45	2.05991	0.233961	8.8045	1.31437e-18	2.20434e-17	ENSG00000111490	up	YES
67.4232	-5.00202	0.568157	-8.80394	1.321e-18	2.21373e-17	ENSG00000165061	down	YES
7454.26	1.24604	0.141543	8.80328	1.32876e-18	2.22501e-17	ENSG00000164610	up	YES
643.508	3.02317	0.343418	8.80317	1.33004e-18	2.2254e-17	ENSG00000181544	up	YES
352.063	-5.57764	0.63361	-8.80296	1.33251e-18	2.22738e-17	ENSG00000274956	down	YES
96.5404	-2.72391	0.309434	-8.8029	1.33329e-18	2.22738e-17	ENSG00000177453	down	YES
23891.8	2.83138	0.321649	8.80271	1.33552e-18	2.22936e-17	ENSG00000088899	up	YES
9270.13	1.18717	0.13487	8.80235	1.33977e-18	2.23472e-17	ENSG00000103037	up	YES
11649.5	-4.76417	0.541296	-8.80142	1.35097e-18	2.25165e-17	ENSG00000112276	down	YES
702.456	2.27837	0.25887	8.80122	1.35337e-18	2.25391e-17	ENSG00000234432	up	YES
8268.3	3.23401	0.367478	8.80056	1.36137e-18	2.26547e-17	ENSG00000138795	up	YES
121223	-1.70364	0.193591	-8.80019	1.36584e-18	2.27115e-17	ENSG00000175662	down	YES
106.967	-5.18551	0.589262	-8.80001	1.36802e-18	2.273e-17	ENSG00000181656	down	YES
6645.2	1.56025	0.177364	8.79688	1.40669e-18	2.33546e-17	ENSG00000154429	up	YES
2.23853e+06	-4.41612	0.502019	-8.79671	1.40882e-18	2.33718e-17	ENSG00000134240	down	YES
640.659	2.51338	0.285732	8.79627	1.41441e-18	2.34464e-17	ENSG00000275437	up	YES
699850	1.35056	0.153585	8.79361	1.44823e-18	2.39886e-17	ENSG00000187109	up	YES
1.47846e+06	-2.16684	0.246445	-8.79237	1.46433e-18	2.42365e-17	ENSG00000135052	down	YES
43247.9	1.38794	0.15791	8.78947	1.50263e-18	2.48512e-17	ENSG00000123179	up	YES
91219.9	1.48309	0.168759	8.78821	1.5196e-18	2.51125e-17	ENSG00000165271	up	YES
51.9049	3.0935	0.352052	8.78705	1.53542e-18	2.53546e-17	ENSG00000261220	up	YES
110.383	-4.61697	0.525617	-8.78391	1.57893e-18	2.60529e-17	ENSG00000169085	down	YES
53766.5	-1.08748	0.12381	-8.78349	1.58476e-18	2.6129e-17	ENSG00000090432	down	YES
108964	3.03183	0.345224	8.78222	1.60286e-18	2.64072e-17	ENSG00000112655	up	YES
4878.15	-2.85365	0.325018	-8.78	1.63479e-18	2.69127e-17	ENSG00000102003	down	YES
139.364	4.04713	0.46105	8.77807	1.66298e-18	2.73558e-17	ENSG00000279901	up	YES
89.2631	4.94575	0.563539	8.77624	1.69031e-18	2.77839e-17	ENSG00000096088	up	YES
939.345	2.91277	0.331961	8.77443	1.71771e-18	2.82128e-17	ENSG00000272899	up	YES
134.132	-3.51487	0.400677	-8.77233	1.75005e-18	2.87219e-17	ENSG00000197992	down	YES
9864.08	-3.64069	0.415069	-8.7713	1.76609e-18	2.8963e-17	ENSG00000118308	down	YES
31179	1.00086	0.114112	8.77084	1.77334e-18	2.90597e-17	ENSG00000122687	up	YES
467846	-5.78002	0.659415	-8.76536	1.86173e-18	3.0485e-17	ENSG00000100604	down	YES
246.337	5.27284	0.601673	8.76364	1.89051e-18	3.09326e-17	ENSG00000183145	up	YES
1.48198e+06	2.34516	0.267664	8.76158	1.92525e-18	3.14679e-17	ENSG00000112378	up	YES
17696.9	1.91722	0.218822	8.76153	1.92616e-18	3.14679e-17	ENSG00000137807	up	YES
38692.8	1.74402	0.199094	8.75979	1.95606e-18	3.19321e-17	ENSG00000148335	up	YES
82930.9	-1.49703	0.170902	-8.7596	1.95952e-18	3.194e-17	ENSG00000117682	down	YES
32748.2	8.79238	1.00374	8.7596	1.95945e-18	3.194e-17	ENSG00000212232	up	YES
64.578	-5.12422	0.585121	-8.75754	1.99561e-18	3.25037e-17	ENSG00000036828	down	YES
43.276	4.20091	0.479725	8.75691	2.00676e-18	3.26605e-17	ENSG00000258919	up	YES
758260	-3.78119	0.431838	-8.75603	2.0224e-18	3.289e-17	ENSG00000120885	down	YES
7887.13	2.11297	0.241329	8.75555	2.03116e-18	3.30075e-17	ENSG00000085999	up	YES
415392	0.841785	0.0961484	8.75506	2.0399e-18	3.31244e-17	ENSG00000147274	up	YES
1221	-4.34542	0.496505	-8.75201	2.09578e-18	3.40062e-17	ENSG00000164270	down	YES
175.591	2.7619	0.315577	8.75192	2.09756e-18	3.40093e-17	ENSG00000169989	up	YES
109932	4.25781	0.486582	8.75045	2.12507e-18	3.44294e-17	ENSG00000131746	up	YES
11357	1.44781	0.16546	8.75024	2.12894e-18	3.4466e-17	ENSG00000104218	up	YES
10802.3	-5.67217	0.64832	-8.74903	2.15193e-18	3.48119e-17	ENSG00000249948	down	YES
36878.6	2.02075	0.231001	8.74782	2.17519e-18	3.51617e-17	ENSG00000183579	up	YES
21946.9	2.04228	0.233465	8.7477	2.17752e-18	3.5173e-17	ENSG00000162063	up	YES
18484.6	2.18913	0.250314	8.74552	2.21993e-18	3.58309e-17	ENSG00000102221	up	YES
12986.1	1.93461	0.221244	8.74422	2.24569e-18	3.62195e-17	ENSG00000111665	up	YES
171723	-3.02493	0.345949	-8.74387	2.25268e-18	3.6305e-17	ENSG00000187239	down	YES
1.01947e+07	1.67185	0.191208	8.74364	2.25709e-18	3.63489e-17	ENSG00000070756	up	YES
107245	1.77889	0.203455	8.74343	2.26137e-18	3.63905e-17	ENSG00000073111	up	YES
71520.9	1.45538	0.166491	8.74147	2.30098e-18	3.70001e-17	ENSG00000114993	up	YES
8028.99	2.14945	0.246089	8.73443	2.44881e-18	3.93478e-17	ENSG00000170191	up	YES
27.4825	-4.65042	0.532531	-8.73267	2.48722e-18	3.99351e-17	ENSG00000179796	down	YES
5649.57	1.83683	0.210358	8.73193	2.50364e-18	4.01686e-17	ENSG00000187024	up	YES
119.63	4.98783	0.571226	8.7318	2.50645e-18	4.01837e-17	ENSG00000229950	up	YES
203634	-4.40664	0.50482	-8.72913	2.56639e-18	4.11074e-17	ENSG00000086696	down	YES
15022.8	-3.5135	0.402506	-8.72906	2.5679e-18	4.11074e-17	ENSG00000140323	down	YES
91623.3	-2.8145	0.322596	-8.72452	2.67302e-18	4.27584e-17	ENSG00000138735	down	YES
150486	-1.62836	0.186704	-8.72162	2.74246e-18	4.38364e-17	ENSG00000060971	down	YES
32901	-4.89839	0.561872	-8.71798	2.83209e-18	4.52355e-17	ENSG00000170153	down	YES
105.215	5.47077	0.628097	8.71008	3.03673e-18	4.8468e-17	ENSG00000235884	up	YES
4055.12	-2.96487	0.34041	-8.7097	3.04686e-18	4.85935e-17	ENSG00000177363	down	YES
700.135	5.33308	0.612368	8.70894	3.0674e-18	4.88848e-17	ENSG00000204866	up	YES
62.3402	2.28157	0.262016	8.70775	3.09959e-18	4.93612e-17	ENSG00000274897	up	YES
33192.4	1.34117	0.154034	8.70698	3.12078e-18	4.96619e-17	ENSG00000160214	up	YES
20.6202	-3.30799	0.380083	-8.70333	3.22285e-18	5.1248e-17	ENSG00000273771	down	YES
18819.1	-1.52133	0.174823	-8.7021	3.25801e-18	5.17688e-17	ENSG00000135828	down	YES
62.7962	-4.67415	0.537374	-8.69813	3.37401e-18	5.35724e-17	ENSG00000169618	down	YES
237.116	-2.8391	0.326426	-8.69752	3.39227e-18	5.38226e-17	ENSG00000281100	down	YES
16539	9.0238	1.03762	8.69659	3.42007e-18	5.41915e-17	ENSG00000066405	up	YES
233.238	4.77612	0.549196	8.69657	3.42057e-18	5.41915e-17	ENSG00000197301	up	YES
27462.6	-2.20473	0.253631	-8.69266	3.54036e-18	5.60479e-17	ENSG00000272414	down	YES
4757.51	-3.93679	0.45296	-8.69126	3.58453e-18	5.67053e-17	ENSG00000115556	down	YES
43505.5	2.87295	0.33067	8.68827	3.68004e-18	5.81733e-17	ENSG00000081059	up	YES
4885.84	2.00066	0.23028	8.68797	3.68982e-18	5.8285e-17	ENSG00000185838	up	YES
1036.7	-3.2369	0.372683	-8.6854	3.77408e-18	5.95722e-17	ENSG00000198483	down	YES
637.232	-3.36458	0.387389	-8.68528	3.77821e-18	5.95935e-17	ENSG00000166257	down	YES
8179.06	2.15001	0.24761	8.68307	3.85237e-18	6.07187e-17	ENSG00000106133	up	YES
27798.2	1.30929	0.150824	8.6809	3.92656e-18	6.18426e-17	ENSG00000128534	up	YES
157.989	-3.44112	0.39641	-8.68071	3.93303e-18	6.18991e-17	ENSG00000223802	down	YES
2865.61	1.5286	0.176093	8.68062	3.93615e-18	6.19028e-17	ENSG00000234912	up	YES
27879.9	1.37687	0.158643	8.67903	3.99163e-18	6.27293e-17	ENSG00000109065	up	YES
2136.43	-5.37365	0.619164	-8.67888	3.99672e-18	6.27634e-17	ENSG00000226306	down	YES
8782.29	-4.00434	0.461423	-8.67822	4.01999e-18	6.30827e-17	ENSG00000175906	down	YES
206951	-4.78843	0.551883	-8.67654	4.08006e-18	6.39786e-17	ENSG00000073737	down	YES
192414	1.50443	0.17341	8.67557	4.11474e-18	6.44753e-17	ENSG00000147955	up	YES
877.845	-4.22494	0.487048	-8.67458	4.15094e-18	6.4995e-17	ENSG00000108830	down	YES
38366	3.06325	0.35315	8.67407	4.16937e-18	6.52361e-17	ENSG00000117707	up	YES
29.925	-4.04923	0.466826	-8.67396	4.17351e-18	6.52532e-17	ENSG00000170743	down	YES
196.423	-3.79647	0.437773	-8.67222	4.2376e-18	6.62071e-17	ENSG00000185760	down	YES
642.884	-6.0958	0.702997	-8.67115	4.27782e-18	6.67868e-17	ENSG00000013293	down	YES
1979.93	3.72349	0.429505	8.66926	4.34945e-18	6.78559e-17	ENSG00000224916	up	YES
7887.91	-4.11586	0.474897	-8.66685	4.44233e-18	6.92545e-17	ENSG00000130055	down	YES
2075.9	-4.17605	0.481994	-8.66413	4.54992e-18	7.08803e-17	ENSG00000136457	down	YES
17083.9	-2.71597	0.313484	-8.66381	4.56246e-18	7.10201e-17	ENSG00000118526	down	YES
46183.1	3.32192	0.383428	8.66374	4.5655e-18	7.10201e-17	ENSG00000101194	up	YES
479.873	4.46385	0.51532	8.66229	4.62397e-18	7.18775e-17	ENSG00000261295	up	YES
13533.3	-3.95841	0.457037	-8.66103	4.6754e-18	7.26244e-17	ENSG00000154277	down	YES
25893.4	-4.57957	0.528803	-8.66026	4.707e-18	7.30095e-17	ENSG00000181856	down	YES
140700	1.50004	0.173209	8.6603	4.70541e-18	7.30095e-17	ENSG00000164163	up	YES
7258.55	-3.66931	0.423745	-8.65924	4.74921e-18	7.3611e-17	ENSG00000112964	down	YES
55970.3	2.06842	0.238874	8.65903	4.75785e-18	7.36918e-17	ENSG00000170312	up	YES
1058.81	-1.74437	0.201473	-8.65807	4.79837e-18	7.42657e-17	ENSG00000131849	down	YES
6900.39	-6.18299	0.714246	-8.65667	4.85767e-18	7.51294e-17	ENSG00000012504	down	YES
50581.5	1.93343	0.223354	8.65634	4.87168e-18	7.52918e-17	ENSG00000082512	up	YES
206258	1.4608	0.168835	8.65226	5.04902e-18	7.79766e-17	ENSG00000074696	up	YES
3649.4	5.78852	0.669148	8.65058	5.12383e-18	7.90749e-17	ENSG00000015520	up	YES
75528.6	2.84068	0.328444	8.64891	5.19915e-18	8.01797e-17	ENSG00000144485	up	YES
13091.3	1.87946	0.217344	8.64739	5.26909e-18	8.11999e-17	ENSG00000171163	up	YES
227.204	-3.16514	0.3661	-8.64557	5.35366e-18	8.2444e-17	ENSG00000280032	down	YES
148861	-3.56014	0.412065	-8.63977	5.6327e-18	8.6679e-17	ENSG00000141574	down	YES
5123.99	-2.88003	0.33336	-8.63939	5.65158e-18	8.69072e-17	ENSG00000144619	down	YES
58156.3	-5.11943	0.592634	-8.63843	5.69914e-18	8.75759e-17	ENSG00000149596	down	YES
84272.6	-4.10238	0.475002	-8.63655	5.79349e-18	8.8962e-17	ENSG00000109846	down	YES
53234.6	-1.91394	0.221698	-8.63312	5.96985e-18	9.16046e-17	ENSG00000139508	down	YES
124723	1.57945	0.182983	8.63165	6.04707e-18	9.27232e-17	ENSG00000149658	up	YES
20486.1	2.03984	0.23637	8.62983	6.14445e-18	9.4149e-17	ENSG00000165304	up	YES
720849	-2.42578	0.2812	-8.62652	6.32466e-18	9.68413e-17	ENSG00000105755	down	YES
883.268	-4.40167	0.51037	-8.62447	6.43876e-18	9.8518e-17	ENSG00000177103	down	YES
26318.2	1.21008	0.140318	8.62389	6.47166e-18	9.89509e-17	ENSG00000004866	up	YES
19316.2	-2.95892	0.343112	-8.62376	6.47887e-18	9.89907e-17	ENSG00000184113	down	YES
7522.63	1.93586	0.224486	8.62353	6.49206e-18	9.91217e-17	ENSG00000189007	up	YES
113173	-1.14199	0.132431	-8.62334	6.50289e-18	9.92165e-17	ENSG00000135766	down	YES
27066.4	1.37045	0.158928	8.6231	6.51648e-18	9.93533e-17	ENSG00000065057	up	YES
47.5737	-4.54811	0.527592	-8.6205	6.66651e-18	1.01568e-16	ENSG00000245526	down	YES
27058.9	1.21042	0.140504	8.61485	7.00358e-18	1.06628e-16	ENSG00000160917	up	YES
2860.01	-2.2148	0.257119	-8.61388	7.06271e-18	1.07452e-16	ENSG00000100490	down	YES
939.89	2.86872	0.333044	8.61365	7.07688e-18	1.07592e-16	ENSG00000125864	up	YES
13602.9	1.58669	0.184209	8.61355	7.08331e-18	1.07613e-16	ENSG00000101945	up	YES
509.391	2.92509	0.339608	8.61312	7.10968e-18	1.07937e-16	ENSG00000184949	up	YES
72.3358	-5.13321	0.596023	-8.61244	7.15206e-18	1.08504e-16	ENSG00000203808	down	YES
4655.68	-4.06412	0.471947	-8.61139	7.21822e-18	1.0943e-16	ENSG00000197361	down	YES
161755	-4.30314	0.499754	-8.61052	7.27271e-18	1.10179e-16	ENSG00000137726	down	YES
82476.7	-4.35652	0.506045	-8.60896	7.3724e-18	1.1161e-16	ENSG00000172935	down	YES
194125	1.06688	0.123957	8.60682	7.51169e-18	1.13639e-16	ENSG00000088205	up	YES
61.5111	-2.36004	0.274276	-8.60462	7.65722e-18	1.15759e-16	ENSG00000260025	down	YES
166.849	5.32749	0.619201	8.60383	7.71015e-18	1.16477e-16	ENSG00000162009	up	YES
227347	-4.44604	0.517059	-8.59871	8.06137e-18	1.21697e-16	ENSG00000156113	down	YES
2495.73	5.90152	0.686552	8.59588	8.26267e-18	1.24648e-16	ENSG00000136231	up	YES
634.179	1.96746	0.22891	8.59489	8.33462e-18	1.25646e-16	ENSG00000272455	up	YES
104561	-1.14471	0.133266	-8.58968	8.72142e-18	1.31384e-16	ENSG00000132313	down	YES
59.753	-3.71419	0.432473	-8.58826	8.82988e-18	1.32925e-16	ENSG00000275897	down	YES
18095	-5.27382	0.614109	-8.58776	8.86826e-18	1.33409e-16	ENSG00000173237	down	YES
8338.84	-1.71005	0.199129	-8.58766	8.87607e-18	1.33433e-16	ENSG00000070759	down	YES
50628	1.57111	0.182988	8.58588	9.01448e-18	1.35419e-16	ENSG00000132953	up	YES
13442.4	1.50352	0.175198	8.58185	9.33633e-18	1.40156e-16	ENSG00000174177	up	YES
6382.95	2.41695	0.28165	8.58139	9.37363e-18	1.40618e-16	ENSG00000065328	up	YES
124705	-1.74217	0.203039	-8.58047	9.44893e-18	1.41648e-16	ENSG00000119950	down	YES
1235.29	-3.44784	0.401914	-8.57855	9.60749e-18	1.43925e-16	ENSG00000269186	down	YES
5960.22	2.16844	0.252781	8.57834	9.62505e-18	1.43987e-16	ENSG00000140534	up	YES
89279.7	-1.12739	0.131422	-8.57842	9.61865e-18	1.43987e-16	ENSG00000213463	down	YES
260.817	2.25534	0.26299	8.57576	9.84312e-18	1.47146e-16	ENSG00000262712	up	YES
30285.6	2.25058	0.262474	8.57449	9.95306e-18	1.48686e-16	ENSG00000094804	up	YES
10056.1	4.46058	0.52032	8.57277	1.01022e-17	1.50809e-16	ENSG00000204876	up	YES
6836.89	-3.21656	0.375244	-8.57191	1.01783e-17	1.51841e-16	ENSG00000154917	down	YES
95.0718	-3.60197	0.420355	-8.56889	1.04483e-17	1.5576e-16	ENSG00000231672	down	YES
36.55	-4.18962	0.489019	-8.56741	1.05843e-17	1.57677e-16	ENSG00000124302	down	YES
21304.8	1.29331	0.150998	8.56507	1.08013e-17	1.60799e-16	ENSG00000147905	up	YES
115254	1.44693	0.168954	8.56404	1.08984e-17	1.62132e-16	ENSG00000155561	up	YES
84094.6	1.33434	0.155845	8.562	1.10922e-17	1.64901e-16	ENSG00000106009	up	YES
37806.7	5.59362	0.653343	8.56155	1.11364e-17	1.65443e-16	ENSG00000149968	up	YES
183883	1.24855	0.14586	8.55989	1.12974e-17	1.67719e-16	ENSG00000138363	up	YES
1866.2	3.78916	0.442706	8.55909	1.13758e-17	1.68766e-16	ENSG00000137877	up	YES
3542.41	-4.68084	0.547051	-8.55649	1.16354e-17	1.72498e-16	ENSG00000133328	down	YES
90.2099	-2.96544	0.346599	-8.55583	1.17025e-17	1.73332e-16	ENSG00000100678	down	YES
65498	2.21801	0.259241	8.55578	1.17078e-17	1.73332e-16	ENSG00000103064	up	YES
51435	-1.69929	0.198628	-8.55512	1.17749e-17	1.74205e-16	ENSG00000163249	down	YES
29315.4	-6.81826	0.797251	-8.55221	1.20752e-17	1.78526e-16	ENSG00000174358	down	YES
38446.2	-2.27022	0.265541	-8.5494	1.23727e-17	1.82797e-16	ENSG00000113580	down	YES
259.264	-3.32645	0.389204	-8.54682	1.26531e-17	1.86812e-16	ENSG00000272143	down	YES
57502.2	1.83631	0.214861	8.54648	1.26894e-17	1.87219e-16	ENSG00000052749	up	YES
70010	5.26174	0.615692	8.54606	1.27365e-17	1.87784e-16	ENSG00000124882	up	YES
103134	1.14751	0.134276	8.54595	1.2748e-17	1.87826e-16	ENSG00000127947	up	YES
23683.1	-4.29875	0.503235	-8.54223	1.31658e-17	1.93848e-16	ENSG00000197380	down	YES
614167	-6.27534	0.734931	-8.53868	1.35759e-17	1.99749e-16	ENSG00000167434	down	YES
752.406	-4.65111	0.544785	-8.53751	1.3715e-17	2.01658e-16	ENSG00000142973	down	YES
32066.8	1.38734	0.162509	8.53703	1.37721e-17	2.02359e-16	ENSG00000105849	up	YES
52.6842	-3.72446	0.436393	-8.53465	1.40584e-17	2.06424e-16	ENSG00000227467	down	YES
18647.2	-3.59471	0.421228	-8.53388	1.41517e-17	2.07652e-16	ENSG00000178462	down	YES
122302	-3.28196	0.384675	-8.53177	1.44124e-17	2.11333e-16	ENSG00000154734	down	YES
142.602	-4.62907	0.542616	-8.53103	1.45055e-17	2.12553e-16	ENSG00000063015	down	YES
452735	-1.49758	0.175565	-8.53007	1.46264e-17	2.14179e-16	ENSG00000204370	down	YES
1348.51	4.46959	0.524534	8.52106	1.58101e-17	2.31353e-16	ENSG00000187867	up	YES
32.7979	-3.30013	0.387301	-8.52083	1.58416e-17	2.31656e-16	ENSG00000261730	down	YES
3118.93	5.19915	0.610187	8.52057	1.58764e-17	2.32007e-16	ENSG00000119547	up	YES
165628	1.67419	0.196573	8.51688	1.63906e-17	2.39359e-16	ENSG00000101199	up	YES
21789.6	1.39138	0.163421	8.51406	1.67942e-17	2.45086e-16	ENSG00000112242	up	YES
442.989	5.54362	0.651359	8.51085	1.72661e-17	2.51801e-16	ENSG00000177508	up	YES
862.386	3.70867	0.435797	8.51009	1.73792e-17	2.53278e-16	ENSG00000244300	up	YES
34112.1	1.85253	0.217824	8.5047	1.82066e-17	2.65157e-16	ENSG00000161996	up	YES
494.352	2.42081	0.284671	8.50389	1.83343e-17	2.66836e-16	ENSG00000198108	up	YES
44729.7	1.17515	0.138202	8.5031	1.84592e-17	2.68472e-16	ENSG00000136811	up	YES
69161.3	-5.16717	0.607728	-8.50245	1.85632e-17	2.69801e-16	ENSG00000072195	down	YES
1269.04	4.36489	0.513423	8.50153	1.87102e-17	2.71754e-16	ENSG00000132031	up	YES
271.845	-4.28143	0.50371	-8.4998	1.89923e-17	2.75664e-16	ENSG00000213144	down	YES
197437	2.77417	0.326567	8.49495	1.98016e-17	2.87217e-16	ENSG00000166278	up	YES
47561.1	-1.61776	0.190471	-8.49347	2.00552e-17	2.90699e-16	ENSG00000008382	down	YES
353194	5.40608	0.636684	8.49099	2.04879e-17	2.9677e-16	ENSG00000169429	up	YES
276.295	-4.73697	0.557963	-8.48976	2.07068e-17	2.99537e-16	ENSG00000138650	down	YES
33.7844	4.53538	0.534217	8.48976	2.07057e-17	2.99537e-16	ENSG00000257138	up	YES
19387.5	1.8198	0.214363	8.48934	2.0782e-17	3.00422e-16	ENSG00000012048	up	YES
70.8623	4.299	0.506562	8.48661	2.12751e-17	3.07344e-16	ENSG00000134760	up	YES
43659.1	1.4799	0.174401	8.48559	2.14618e-17	3.09832e-16	ENSG00000165689	up	YES
852.671	-4.27392	0.50369	-8.48522	2.15307e-17	3.10618e-16	ENSG00000173930	down	YES
9137.69	2.4859	0.292995	8.48443	2.16781e-17	3.12534e-16	ENSG00000172965	up	YES
57686.1	-1.646	0.19402	-8.48367	2.18208e-17	3.14381e-16	ENSG00000158006	down	YES
10513.3	4.55558	0.537055	8.48252	2.20366e-17	3.17276e-16	ENSG00000198542	up	YES
1209.52	4.91107	0.57903	8.48156	2.22204e-17	3.19708e-16	ENSG00000268628	up	YES
79060.2	1.76717	0.208391	8.48007	2.25052e-17	3.2359e-16	ENSG00000116455	up	YES
327.878	-5.43426	0.640861	-8.47963	2.25916e-17	3.24614e-16	ENSG00000004846	down	YES
17486	-4.51116	0.532038	-8.47902	2.27105e-17	3.26104e-16	ENSG00000156218	down	YES
51.1006	-3.07611	0.362836	-8.47797	2.29153e-17	3.28825e-16	ENSG00000214491	down	YES
32107.4	1.39568	0.164636	8.47737	2.30343e-17	3.30313e-16	ENSG00000105793	up	YES
434987	-5.22751	0.61673	-8.47617	2.32729e-17	3.3351e-16	ENSG00000004776	down	YES
17165.2	1.20875	0.142627	8.47496	2.3516e-17	3.36769e-16	ENSG00000122678	up	YES
36518.1	-1.25383	0.148114	-8.4653	2.55494e-17	3.65646e-16	ENSG00000158793	down	YES
4216.03	-2.96932	0.351067	-8.45799	2.72027e-17	3.89047e-16	ENSG00000139970	down	YES
746.387	5.91854	0.69988	8.4565	2.75518e-17	3.93778e-16	ENSG00000196917	up	YES
20.6697	4.91742	0.581518	8.45617	2.76297e-17	3.94629e-16	ENSG00000259225	up	YES
73.6917	-3.37705	0.399387	-8.45559	2.77681e-17	3.96342e-16	ENSG00000228307	down	YES
4678.29	2.04439	0.241861	8.45273	2.8457e-17	4.05904e-16	ENSG00000176208	up	YES
8258.15	-3.56586	0.421916	-8.45158	2.87376e-17	4.09635e-16	ENSG00000132514	down	YES
347302	-1.93987	0.22953	-8.45147	2.87658e-17	4.09765e-16	ENSG00000095203	down	YES
662.713	-3.22906	0.382117	-8.45044	2.90211e-17	4.13128e-16	ENSG00000163661	down	YES
67895	1.67168	0.197837	8.4498	2.91795e-17	4.15107e-16	ENSG00000001497	up	YES
332824	1.77342	0.209923	8.44795	2.96475e-17	4.21485e-16	ENSG00000196187	up	YES
10919.9	1.64757	0.19513	8.44346	3.08085e-17	4.37701e-16	ENSG00000170448	up	YES
636.801	-2.79565	0.331137	-8.44258	3.10399e-17	4.40697e-16	ENSG00000169252	down	YES
86.9146	3.95597	0.468796	8.43858	3.21223e-17	4.55763e-16	ENSG00000179846	up	YES
8761.86	1.66521	0.197369	8.43704	3.25473e-17	4.61488e-16	ENSG00000142528	up	YES
11621.4	1.56131	0.185058	8.43691	3.25848e-17	4.61715e-16	ENSG00000172766	up	YES
83.0234	-3.89497	0.461805	-8.43423	3.33377e-17	4.72072e-16	ENSG00000179399	down	YES
45.9909	3.30271	0.391635	8.43315	3.36485e-17	4.76159e-16	ENSG00000254973	up	YES
1279.05	-3.14649	0.37328	-8.42931	3.47707e-17	4.91714e-16	ENSG00000197565	down	YES
51612.6	-6.40193	0.759643	-8.42755	3.52979e-17	4.98841e-16	ENSG00000118729	down	YES
5156.73	-4.06468	0.482386	-8.42619	3.57112e-17	5.0435e-16	ENSG00000144218	down	YES
25762.2	-2.33043	0.276576	-8.426	3.57682e-17	5.04824e-16	ENSG00000146122	down	YES
16728.1	2.11658	0.251251	8.42414	3.63414e-17	5.12576e-16	ENSG00000127586	up	YES
2.94829e+06	1.46762	0.174386	8.4159	3.89883e-17	5.49188e-16	ENSG00000181163	up	YES
220375	0.926336	0.11007	8.41592	3.89838e-17	5.49188e-16	ENSG00000103275	up	YES
2119.44	-7.47739	0.8885	-8.41575	3.904e-17	5.49554e-16	ENSG00000132874	down	YES
50451.1	-2.02236	0.240314	-8.41549	3.91242e-17	5.5038e-16	ENSG00000253313	down	YES
30746.2	-4.6654	0.554488	-8.41389	3.96641e-17	5.5761e-16	ENSG00000100079	down	YES
26759.7	-3.30398	0.392892	-8.4094	4.12128e-17	5.79003e-16	ENSG00000177675	down	YES
81.8356	3.69795	0.439753	8.40916	4.12972e-17	5.79808e-16	ENSG00000246528	up	YES
45399	1.05959	0.126039	8.40685	4.21157e-17	5.90914e-16	ENSG00000144231	up	YES
52392.4	1.92667	0.229277	8.40325	4.34307e-17	6.08965e-16	ENSG00000059588	up	YES
272293	-1.80189	0.214481	-8.40117	4.42039e-17	6.19403e-16	ENSG00000160685	down	YES
11313.6	1.48546	0.176842	8.39996	4.46646e-17	6.2545e-16	ENSG00000162129	up	YES
35751.3	1.74042	0.207229	8.39856	4.5199e-17	6.32521e-16	ENSG00000013573	up	YES
29005.9	-1.94352	0.231413	-8.39847	4.52344e-17	6.32603e-16	ENSG00000151229	down	YES
5158.13	1.66877	0.198703	8.39831	4.52944e-17	6.3303e-16	ENSG00000196083	up	YES
10282.9	1.67544	0.199529	8.397	4.58041e-17	6.39737e-16	ENSG00000198554	up	YES
144.091	2.85043	0.339501	8.39594	4.62191e-17	6.45114e-16	ENSG00000167968	up	YES
5166.63	2.09642	0.249742	8.39435	4.68464e-17	6.53445e-16	ENSG00000115163	up	YES
45063.6	-3.20437	0.381734	-8.39424	4.68926e-17	6.53664e-16	ENSG00000268388	down	YES
4458	1.58291	0.188729	8.38721	4.97827e-17	6.93501e-16	ENSG00000161692	up	YES
233.828	2.42193	0.288775	8.38691	4.991e-17	6.94824e-16	ENSG00000131019	up	YES
50453.7	1.35657	0.161818	8.38332	5.14557e-17	7.15414e-16	ENSG00000130731	up	YES
5.47228e+06	0.909272	0.108462	8.38335	5.14417e-17	7.15414e-16	ENSG00000135486	up	YES
2289.97	-8.36028	0.997359	-8.38242	5.18522e-17	7.2046e-16	ENSG00000185681	down	YES
66800.9	-1.97528	0.23566	-8.38192	5.20707e-17	7.23029e-16	ENSG00000198721	down	YES
99970.7	-1.4637	0.174671	-8.37976	5.30341e-17	7.3593e-16	ENSG00000117305	down	YES
37.546	-4.97949	0.594243	-8.37954	5.31338e-17	7.36361e-16	ENSG00000180287	down	YES
372.451	-3.11784	0.372077	-8.37955	5.31315e-17	7.36361e-16	ENSG00000131094	down	YES
27243.2	-2.39022	0.285301	-8.37791	5.38754e-17	7.46157e-16	ENSG00000185561	down	YES
552839	-1.82158	0.217494	-8.37533	5.50674e-17	7.62174e-16	ENSG00000110090	down	YES
2622.49	-4.06051	0.484892	-8.37404	5.56747e-17	7.70083e-16	ENSG00000082175	down	YES
12910.6	2.10286	0.251235	8.3701	5.75671e-17	7.95746e-16	ENSG00000075218	up	YES
7149.51	2.30182	0.275029	8.36937	5.79288e-17	8.0023e-16	ENSG00000174371	up	YES
7993.6	1.48978	0.178043	8.36754	5.88343e-17	8.12217e-16	ENSG00000040275	up	YES
488.924	3.15338	0.376896	8.36671	5.92507e-17	8.17439e-16	ENSG00000203688	up	YES
99897	1.3465	0.160941	8.36645	5.93818e-17	8.18196e-16	ENSG00000176853	up	YES
68.9144	-4.55017	0.543856	-8.3665	5.93562e-17	8.18196e-16	ENSG00000267405	down	YES
338.266	3.04829	0.364376	8.36577	5.97235e-17	8.22376e-16	ENSG00000270933	up	YES
90855.3	1.48487	0.177504	8.36529	5.9966e-17	8.25186e-16	ENSG00000073008	up	YES
91136.1	1.33034	0.159122	8.36047	6.24666e-17	8.59046e-16	ENSG00000167962	up	YES
123.69	-3.87541	0.463647	-8.35852	6.35081e-17	8.72809e-16	ENSG00000138379	down	YES
2786.27	-3.58762	0.429288	-8.35715	6.42536e-17	8.82491e-16	ENSG00000130224	down	YES
11637.9	-1.64954	0.19742	-8.35549	6.51607e-17	8.94377e-16	ENSG00000117791	down	YES
411500	1.16235	0.139152	8.35309	6.64983e-17	9.12153e-16	ENSG00000131473	up	YES
194814	1.30305	0.156019	8.35185	6.72012e-17	9.21206e-16	ENSG00000100401	up	YES
17673.7	2.22391	0.266387	8.34843	6.91775e-17	9.47692e-16	ENSG00000119969	up	YES
31573.6	-1.44681	0.173322	-8.34752	6.97122e-17	9.54408e-16	ENSG00000167578	down	YES
2474.67	3.08411	0.369471	8.34735	6.98117e-17	9.55161e-16	ENSG00000143412	up	YES
30800.7	-2.57782	0.308915	-8.34473	7.13765e-17	9.75949e-16	ENSG00000186594	down	YES
79287.7	1.09262	0.130956	8.34344	7.21607e-17	9.86043e-16	ENSG00000103353	up	YES
1741.32	4.55458	0.545896	8.34332	7.22326e-17	9.86397e-16	ENSG00000167914	up	YES
829101	0.949934	0.113878	8.3417	7.32299e-17	9.9938e-16	ENSG00000130726	up	YES
8416.68	-2.96155	0.355081	-8.3405	7.39791e-17	1.00896e-15	ENSG00000178031	down	YES
12383.5	3.68651	0.442254	8.33574	7.70167e-17	1.04973e-15	ENSG00000176170	up	YES
74457.6	1.22123	0.14654	8.3338	7.8287e-17	1.06636e-15	ENSG00000164134	up	YES
84036.9	1.58036	0.189671	8.3321	7.94231e-17	1.08115e-15	ENSG00000003147	up	YES
42170.1	0.907111	0.108925	8.32785	8.23246e-17	1.11994e-15	ENSG00000087263	up	YES
78883.2	-2.97667	0.357578	-8.32452	8.46731e-17	1.15116e-15	ENSG00000108187	down	YES
30689.9	2.0879	0.250878	8.32235	8.62379e-17	1.17169e-15	ENSG00000133131	up	YES
141989	1.82525	0.219328	8.32204	8.64604e-17	1.17397e-15	ENSG00000153944	up	YES
5735.94	2.30978	0.277554	8.32192	8.65474e-17	1.17441e-15	ENSG00000243406	up	YES
90935.9	1.84531	0.221754	8.32146	8.68887e-17	1.17829e-15	ENSG00000138031	up	YES
454.562	-3.60367	0.433355	-8.31574	9.11824e-17	1.23574e-15	ENSG00000183690	down	YES
3458.79	-3.7416	0.450011	-8.31446	9.21679e-17	1.24831e-15	ENSG00000163145	down	YES
24576	1.94061	0.233419	8.31384	9.26555e-17	1.25412e-15	ENSG00000187741	up	YES
8342.05	-7.29063	0.87696	-8.31353	9.28972e-17	1.2566e-15	ENSG00000115593	down	YES
60.3715	-2.56421	0.308492	-8.31209	9.40344e-17	1.27074e-15	ENSG00000150045	down	YES
479158	-2.0581	0.247605	-8.31205	9.4061e-17	1.27074e-15	ENSG00000160613	down	YES
14237.5	1.43119	0.172248	8.30893	9.65729e-17	1.30386e-15	ENSG00000163918	up	YES
48540	4.40567	0.530383	8.30659	9.84933e-17	1.32895e-15	ENSG00000168243	up	YES
32473.4	-1.48656	0.178989	-8.30532	9.95502e-17	1.34236e-15	ENSG00000154889	down	YES
5266.2	3.54783	0.427311	8.30268	1.01791e-16	1.37171e-15	ENSG00000018280	up	YES
1428.46	2.6174	0.315268	8.30214	1.02252e-16	1.37706e-15	ENSG00000281398	up	YES
3503.92	1.12878	0.135976	8.30129	1.0299e-16	1.38613e-15	ENSG00000134490	up	YES
18268.6	1.58487	0.190931	8.30072	1.03479e-16	1.39184e-15	ENSG00000152749	up	YES
13904.3	-4.18649	0.504417	-8.29966	1.04409e-16	1.40347e-15	ENSG00000118407	down	YES
3275.74	1.20342	0.144997	8.29958	1.04477e-16	1.40351e-15	ENSG00000256525	up	YES
64622.7	-2.46865	0.297477	-8.29861	1.05335e-16	1.41415e-15	ENSG00000263429	down	YES
6800.93	4.01498	0.483939	8.29646	1.0726e-16	1.4391e-15	ENSG00000162849	up	YES
4152.56	3.17731	0.383005	8.29575	1.07898e-16	1.44675e-15	ENSG00000102048	up	YES
95151.7	-2.81464	0.339338	-8.29451	1.09032e-16	1.46104e-15	ENSG00000119227	down	YES
8035.88	-3.27409	0.394754	-8.29402	1.09487e-16	1.46623e-15	ENSG00000149451	down	YES
21927.9	4.03616	0.486701	8.29291	1.10515e-16	1.47907e-15	ENSG00000241186	up	YES
16469.7	1.88807	0.227744	8.29032	1.12941e-16	1.5106e-15	ENSG00000123473	up	YES
157601	1.38555	0.167179	8.2878	1.15367e-16	1.54208e-15	ENSG00000163938	up	YES
23.4005	-4.20138	0.50724	-8.28283	1.20285e-16	1.60682e-15	ENSG00000186675	down	YES
18009.7	1.08109	0.130542	8.2815	1.2163e-16	1.62378e-15	ENSG00000240230	up	YES
1206.09	4.84833	0.585583	8.27948	1.23713e-16	1.65055e-15	ENSG00000189433	up	YES
37611.1	3.39572	0.410234	8.27751	1.25779e-16	1.67708e-15	ENSG00000137809	up	YES
190.776	-2.96378	0.358154	-8.27516	1.28286e-16	1.70944e-15	ENSG00000161640	down	YES
691.265	6.11066	0.73856	8.27375	1.29813e-16	1.72872e-15	ENSG00000279191	up	YES
198915	-5.13964	0.621284	-8.27261	1.31055e-16	1.74418e-15	ENSG00000112936	down	YES
2570.22	1.86391	0.225384	8.26994	1.34031e-16	1.78268e-15	ENSG00000162062	up	YES
34406.4	-2.01712	0.243925	-8.26941	1.34625e-16	1.78947e-15	ENSG00000155846	down	YES
44018.9	1.40835	0.170327	8.26852	1.35631e-16	1.80173e-15	ENSG00000138035	up	YES
130.393	-4.40714	0.53316	-8.26609	1.38425e-16	1.8377e-15	ENSG00000242715	down	YES
47388.1	2.09269	0.253177	8.26573	1.38848e-16	1.84105e-15	ENSG00000164109	up	YES
1553.01	4.96133	0.600229	8.26572	1.38848e-16	1.84105e-15	ENSG00000255026	up	YES
5299.95	-3.03253	0.367017	-8.26266	1.42459e-16	1.88659e-15	ENSG00000152763	down	YES
28217.6	2.00284	0.242397	8.26267	1.42454e-16	1.88659e-15	ENSG00000169679	up	YES
19590	-2.85363	0.345418	-8.2614	1.43969e-16	1.90542e-15	ENSG00000157404	down	YES
55.6198	5.06229	0.61278	8.26119	1.44228e-16	1.90767e-15	ENSG00000248329	up	YES
1.74222e+06	-2.14668	0.25989	-8.25996	1.45718e-16	1.92619e-15	ENSG00000204385	down	YES
32130.2	-2.78865	0.337619	-8.25976	1.45961e-16	1.92821e-15	ENSG00000166510	down	YES
33695.7	1.82027	0.220431	8.25779	1.48393e-16	1.95914e-15	ENSG00000167513	up	YES
146.267	2.6851	0.325249	8.25551	1.5126e-16	1.99576e-15	ENSG00000227630	up	YES
101692	0.955612	0.115783	8.25348	1.53854e-16	2.02874e-15	ENSG00000133275	up	YES
29.4668	-1.89465	0.229561	-8.25336	1.54004e-16	2.02946e-15	ENSG00000270587	down	YES
10243.2	1.74329	0.211465	8.24391	1.66676e-16	2.19511e-15	ENSG00000166451	up	YES
786.069	-3.26544	0.396144	-8.24307	1.67852e-16	2.20925e-15	ENSG00000188488	down	YES
131226	1.19813	0.14541	8.23968	1.72677e-16	2.27136e-15	ENSG00000167635	up	YES
300.474	-2.4464	0.296923	-8.23918	1.73396e-16	2.27942e-15	ENSG00000213316	down	YES
26.9902	-4.58182	0.556115	-8.23898	1.73684e-16	2.2818e-15	ENSG00000198049	down	YES
3003.44	2.78051	0.337514	8.23822	1.74793e-16	2.29498e-15	ENSG00000262001	up	YES
294.518	6.99728	0.849682	8.23518	1.79293e-16	2.35261e-15	ENSG00000204538	up	YES
302.511	4.6267	0.561888	8.2342	1.80768e-16	2.37052e-15	ENSG00000204421	up	YES
2853.86	-3.71764	0.45159	-8.23233	1.83603e-16	2.40623e-15	ENSG00000276409	down	YES
243430	2.82369	0.34303	8.23161	1.84709e-16	2.41924e-15	ENSG00000177410	up	YES
257.283	-5.15179	0.625954	-8.2303	1.8675e-16	2.44449e-15	ENSG00000174611	down	YES
28034	1.07329	0.130418	8.22966	1.87749e-16	2.45607e-15	ENSG00000151576	up	YES
2101.83	1.93532	0.235205	8.22824	1.89986e-16	2.4838e-15	ENSG00000121211	up	YES
14417.5	-2.79673	0.339897	-8.22817	1.901e-16	2.4838e-15	ENSG00000119686	down	YES
78548.4	-1.48766	0.180882	-8.22443	1.9612e-16	2.5609e-15	ENSG00000157823	down	YES
265755	1.73064	0.210505	8.22135	2.0122e-16	2.62589e-15	ENSG00000139514	up	YES
29394.9	0.886328	0.107859	8.21748	2.07824e-16	2.71042e-15	ENSG00000070761	up	YES
9644.43	-2.61164	0.317974	-8.21339	2.15032e-16	2.80273e-15	ENSG00000149090	down	YES
25486.5	1.07535	0.130938	8.21265	2.16352e-16	2.81822e-15	ENSG00000005100	up	YES
14979	3.91797	0.477284	8.20889	2.23244e-16	2.9053e-15	ENSG00000119630	up	YES
1537.69	-3.46153	0.421683	-8.20885	2.23308e-16	2.9053e-15	ENSG00000168621	down	YES
22.3559	-2.84022	0.346009	-8.20851	2.23946e-16	2.91184e-15	ENSG00000228013	down	YES
1011.76	-4.48262	0.546201	-8.2069	2.26974e-16	2.94942e-15	ENSG00000152292	down	YES
58485.3	1.52931	0.186348	8.20676	2.27246e-16	2.95117e-15	ENSG00000156504	up	YES
69400.2	-1.98524	0.241922	-8.20613	2.28433e-16	2.96479e-15	ENSG00000006555	down	YES
86430.1	-2.43767	0.297113	-8.20453	2.31503e-16	3.00283e-15	ENSG00000174640	down	YES
30630.4	0.953463	0.116233	8.203	2.34457e-16	3.0393e-15	ENSG00000149313	up	YES
1393.77	5.64339	0.687988	8.20274	2.34959e-16	3.04398e-15	ENSG00000233922	up	YES
23423.6	1.33856	0.163242	8.19988	2.40622e-16	3.11545e-15	ENSG00000130713	up	YES
280.126	-4.87573	0.594619	-8.19976	2.40871e-16	3.11681e-15	ENSG00000279756	down	YES
17180.9	3.08523	0.376321	8.1984	2.43616e-16	3.15043e-15	ENSG00000135744	up	YES
418.474	-3.16282	0.385795	-8.1982	2.44017e-16	3.15371e-15	ENSG00000160801	down	YES
31090.5	1.48421	0.181075	8.19666	2.47164e-16	3.19246e-15	ENSG00000101391	up	YES
160.441	2.04769	0.249846	8.19578	2.48976e-16	3.21393e-15	ENSG00000260924	up	YES
402362	2.88909	0.35257	8.19439	2.51869e-16	3.24932e-15	ENSG00000204262	up	YES
15788.2	1.52987	0.186725	8.19318	2.5441e-16	3.28013e-15	ENSG00000163611	up	YES
1322.33	-3.57912	0.436968	-8.1908	2.59498e-16	3.34372e-15	ENSG00000115041	down	YES
16701.8	1.1578	0.141357	8.19061	2.59895e-16	3.34683e-15	ENSG00000142330	up	YES
538.506	5.29203	0.646166	8.1899	2.61451e-16	3.36485e-15	ENSG00000112761	up	YES
43988.4	-3.79396	0.463261	-8.18969	2.61909e-16	3.36872e-15	ENSG00000066629	down	YES
959.048	2.35173	0.2872	8.18851	2.64489e-16	3.39987e-15	ENSG00000143786	up	YES
208579	3.86421	0.471942	8.1879	2.65818e-16	3.41492e-15	ENSG00000130513	up	YES
40182.1	1.73432	0.211837	8.18706	2.67696e-16	3.43698e-15	ENSG00000179041	up	YES
467924	1.71762	0.209804	8.18675	2.6837e-16	3.44357e-15	ENSG00000101294	up	YES
2870.92	-3.88907	0.475187	-8.18429	2.7391e-16	3.51256e-15	ENSG00000100626	down	YES
101.784	3.71688	0.454352	8.18063	2.82368e-16	3.61886e-15	ENSG00000232586	up	YES
955.102	-3.08919	0.377626	-8.18055	2.8255e-16	3.61904e-15	ENSG00000038295	down	YES
11780.2	1.73755	0.212415	8.17998	2.8389e-16	3.63403e-15	ENSG00000112742	up	YES
285169	-1.56024	0.190764	-8.1789	2.8644e-16	3.66449e-15	ENSG00000143198	down	YES
3132.94	3.86234	0.472256	8.17848	2.87454e-16	3.67526e-15	ENSG00000135480	up	YES
17659.7	2.67309	0.326904	8.177	2.90999e-16	3.71837e-15	ENSG00000196739	up	YES
199060	2.3807	0.291163	8.17651	2.92177e-16	3.73121e-15	ENSG00000144354	up	YES
8360.11	6.58351	0.805291	8.17532	2.9509e-16	3.76617e-15	ENSG00000244355	up	YES
9376.52	1.67219	0.204559	8.17464	2.9676e-16	3.78524e-15	ENSG00000189046	up	YES
34005.3	-3.66629	0.448507	-8.17443	2.97275e-16	3.78955e-15	ENSG00000115590	down	YES
275.134	1.76473	0.215905	8.17364	2.99232e-16	3.80998e-15	ENSG00000166455	up	YES
39.3675	3.19959	0.39145	8.17367	2.99148e-16	3.80998e-15	ENSG00000273374	up	YES
867.996	4.24678	0.519682	8.17189	3.03589e-16	3.86315e-15	ENSG00000086991	up	YES
841112	-4.63914	0.567716	-8.17158	3.04369e-16	3.87079e-15	ENSG00000188242	down	YES
51110.1	1.04132	0.12744	8.17111	3.0557e-16	3.88376e-15	ENSG00000133422	up	YES
7367.1	2.04073	0.24979	8.16977	3.08968e-16	3.92463e-15	ENSG00000130590	up	YES
363.485	2.38367	0.291852	8.1674	3.1511e-16	4.00028e-15	ENSG00000169330	up	YES
52.1458	3.63435	0.445012	8.16686	3.16517e-16	4.01576e-15	ENSG00000086717	up	YES
221.691	4.1826	0.512167	8.16648	3.17521e-16	4.02612e-15	ENSG00000089558	up	YES
73545.8	2.87141	0.351621	8.16621	3.18219e-16	4.0326e-15	ENSG00000122861	up	YES
167.01	-2.55622	0.313082	-8.16469	3.22251e-16	4.08128e-15	ENSG00000227954	down	YES
356825	1.0897	0.133466	8.16462	3.22447e-16	4.08135e-15	ENSG00000147649	up	YES
485540	-3.31333	0.405909	-8.16274	3.27511e-16	4.143e-15	ENSG00000197256	down	YES
60955.2	4.07429	0.499186	8.16187	3.29878e-16	4.17049e-15	ENSG00000172456	up	YES
3293.24	-2.72813	0.33427	-8.16148	3.30948e-16	4.18155e-15	ENSG00000108405	down	YES
44593.7	1.59615	0.195581	8.16104	3.32139e-16	4.19414e-15	ENSG00000156531	up	YES
27752.4	1.8005	0.220755	8.15609	3.46056e-16	4.3673e-15	ENSG00000088356	up	YES
267395	-1.81364	0.222372	-8.15588	3.4665e-16	4.37223e-15	ENSG00000101782	down	YES
2170.82	-4.94339	0.606284	-8.15359	3.5328e-16	4.45323e-15	ENSG00000256612	down	YES
161522	1.11722	0.137028	8.15318	3.54476e-16	4.46569e-15	ENSG00000102898	up	YES
1819.35	6.17079	0.756877	8.15296	3.55127e-16	4.47127e-15	ENSG00000132746	up	YES
9687.78	2.57489	0.315852	8.15219	3.57394e-16	4.49718e-15	ENSG00000181634	up	YES
121349	1.79355	0.220136	8.14744	3.71705e-16	4.67451e-15	ENSG00000106484	up	YES
6741.98	-5.38686	0.661428	-8.14429	3.81515e-16	4.79508e-15	ENSG00000122756	down	YES
485541	1.3943	0.171207	8.14392	3.82698e-16	4.80712e-15	ENSG00000065150	up	YES
259665	2.77727	0.341057	8.14313	3.85199e-16	4.83571e-15	ENSG00000160932	up	YES
3822.75	1.94362	0.238693	8.14276	3.86368e-16	4.84755e-15	ENSG00000204366	up	YES
50960.6	1.63197	0.200438	8.14203	3.88692e-16	4.87386e-15	ENSG00000107819	up	YES
45313.8	1.45354	0.178524	8.14196	3.88924e-16	4.87392e-15	ENSG00000106683	up	YES
13376.7	2.15524	0.264735	8.1411	3.91709e-16	4.90596e-15	ENSG00000080839	up	YES
1898.93	-5.12104	0.629229	-8.13858	3.9993e-16	5.006e-15	ENSG00000183230	down	YES
82645.7	-1.13455	0.139414	-8.13801	4.01819e-16	5.02672e-15	ENSG00000093167	down	YES
54.514	-2.78546	0.342375	-8.1357	4.09579e-16	5.12081e-15	ENSG00000232871	down	YES
1.27594e+06	1.57937	0.194131	8.13559	4.0994e-16	5.12234e-15	ENSG00000117335	up	YES
7425.8	1.51654	0.186495	8.13178	4.23036e-16	5.2829e-15	ENSG00000159259	up	YES
5246.49	-2.16326	0.266084	-8.12999	4.2934e-16	5.35852e-15	ENSG00000169291	down	YES
406.429	5.45123	0.670618	8.12867	4.34028e-16	5.4127e-15	ENSG00000182912	up	YES
44.991	-3.61473	0.444691	-8.12863	4.34186e-16	5.4127e-15	ENSG00000116783	down	YES
582175	2.59864	0.319697	8.12846	4.34782e-16	5.41698e-15	ENSG00000102265	up	YES
293.936	-6.26139	0.770689	-8.1244	4.49569e-16	5.59797e-15	ENSG00000111262	down	YES
1126.11	2.09519	0.257935	8.12296	4.54941e-16	5.66157e-15	ENSG00000231607	up	YES
20325.7	-6.08065	0.7486	-8.12269	4.55959e-16	5.67096e-15	ENSG00000130822	down	YES
247174	1.76385	0.217191	8.12123	4.61499e-16	5.73654e-15	ENSG00000186184	up	YES
43874	1.72952	0.212974	8.12082	4.6305e-16	5.75248e-15	ENSG00000235173	up	YES
6484.93	1.52601	0.187934	8.11996	4.66339e-16	5.78999e-15	ENSG00000000460	up	YES
1.06125e+07	-4.38248	0.539727	-8.11981	4.66922e-16	5.79389e-15	ENSG00000163586	down	YES
1087.41	2.61842	0.322571	8.11735	4.76468e-16	5.90892e-15	ENSG00000243479	up	YES
31805.6	-3.26461	0.402186	-8.11716	4.77219e-16	5.91482e-15	ENSG00000137872	down	YES
25870.9	2.4177	0.297855	8.11703	4.77731e-16	5.91774e-15	ENSG00000047634	up	YES
44902.2	-2.13355	0.262884	-8.11592	4.82121e-16	5.96868e-15	ENSG00000177191	down	YES
3784.78	1.85026	0.227998	8.11525	4.84767e-16	5.99798e-15	ENSG00000129810	up	YES
549.651	3.69817	0.455716	8.11508	4.85474e-16	6.00326e-15	ENSG00000262370	up	YES
51942.6	1.13305	0.139634	8.11438	4.88278e-16	6.03447e-15	ENSG00000136908	up	YES
17340.2	-3.93628	0.485116	-8.11411	4.89376e-16	6.04456e-15	ENSG00000112186	down	YES
77778.4	1.25526	0.154723	8.11295	4.94067e-16	6.09898e-15	ENSG00000106144	up	YES
19.0652	2.96316	0.365356	8.11033	5.04827e-16	6.22823e-15	ENSG00000224728	up	YES
34488.4	8.8414	1.09049	8.10774	5.15717e-16	6.35893e-15	ENSG00000184956	up	YES
19282.6	-2.09675	0.258637	-8.10691	5.19246e-16	6.39876e-15	ENSG00000188641	down	YES
40015.8	-5.0901	0.62821	-8.10255	5.382e-16	6.62853e-15	ENSG00000127241	down	YES
186.571	1.99598	0.246398	8.10064	5.46697e-16	6.72933e-15	ENSG00000272599	up	YES
44720.5	1.2761	0.157541	8.1001	5.49154e-16	6.75569e-15	ENSG00000101138	up	YES
8946.87	1.33933	0.165386	8.09821	5.57744e-16	6.85744e-15	ENSG00000120539	up	YES
1685.68	2.33093	0.28789	8.09662	5.65072e-16	6.94356e-15	ENSG00000198088	up	YES
54015	2.14069	0.264429	8.09551	5.70267e-16	7.00338e-15	ENSG00000181104	up	YES
1376.32	-3.56233	0.440042	-8.09542	5.70687e-16	7.00454e-15	ENSG00000103942	down	YES
52889.6	1.26516	0.156346	8.09203	5.86763e-16	7.19774e-15	ENSG00000163872	up	YES
273332	-2.06335	0.255128	-8.0875	6.09001e-16	7.46626e-15	ENSG00000074755	down	YES
10274.9	5.34389	0.660992	8.08465	6.23427e-16	7.63728e-15	ENSG00000167757	up	YES
4.00833e+07	-5.38604	0.666209	-8.0846	6.23662e-16	7.63728e-15	ENSG00000211890	down	YES
845.679	-3.65308	0.451949	-8.08295	6.32178e-16	7.73715e-15	ENSG00000140538	down	YES
29357.5	1.59528	0.197367	8.08283	6.32803e-16	7.74039e-15	ENSG00000145604	up	YES
11873.8	1.86358	0.230664	8.07919	6.5199e-16	7.97054e-15	ENSG00000130119	up	YES
831528	-3.93653	0.487292	-8.07838	6.56319e-16	8.0189e-15	ENSG00000058668	down	YES
18121.5	1.80616	0.223699	8.07404	6.80108e-16	8.30482e-15	ENSG00000170779	up	YES
620.233	-4.46803	0.553402	-8.07374	6.81758e-16	8.32024e-15	ENSG00000185046	down	YES
127386	2.29531	0.284331	8.07266	6.87847e-16	8.38978e-15	ENSG00000164171	up	YES
87.5756	4.24743	0.526168	8.07238	6.89421e-16	8.4042e-15	ENSG00000214353	up	YES
64.2411	-2.58494	0.320313	-8.07005	7.02685e-16	8.56103e-15	ENSG00000133958	down	YES
24645.4	1.03777	0.128599	8.06984	7.03908e-16	8.57107e-15	ENSG00000124784	up	YES
23790	-3.29643	0.408633	-8.06695	7.20761e-16	8.7713e-15	ENSG00000213088	down	YES
360.953	1.8079	0.224172	8.06482	7.33466e-16	8.92085e-15	ENSG00000273619	up	YES
51839	-2.93096	0.363494	-8.0633	7.42619e-16	9.02707e-15	ENSG00000157111	down	YES
3508.71	1.45529	0.180515	8.06191	7.5113e-16	9.12536e-15	ENSG00000188312	up	YES
131.782	-4.54115	0.563365	-8.06075	7.58301e-16	9.20206e-15	ENSG00000121207	down	YES
648.863	-1.4789	0.183469	-8.06076	7.58243e-16	9.20206e-15	ENSG00000261338	down	YES
70220	1.85835	0.230624	8.0579	7.76149e-16	9.41333e-15	ENSG00000171316	up	YES
3097.14	-3.64136	0.452026	-8.05564	7.9064e-16	9.58367e-15	ENSG00000113805	down	YES
628.633	-3.22195	0.400032	-8.05423	7.99809e-16	9.68933e-15	ENSG00000136011	down	YES
13662.7	1.25034	0.155253	8.0536	8.03961e-16	9.73414e-15	ENSG00000139266	up	YES
17541.6	-2.32039	0.288196	-8.05143	8.18333e-16	9.90256e-15	ENSG00000124615	down	YES
94145.6	-5.83817	0.725195	-8.05049	8.24612e-16	9.97293e-15	ENSG00000075073	down	YES
134940	1.17235	0.145652	8.04894	8.35153e-16	1.00947e-14	ENSG00000108262	up	YES
4.52128e+06	-3.00191	0.372989	-8.04825	8.39888e-16	1.01462e-14	ENSG00000117472	down	YES
72641.6	-1.34744	0.167452	-8.04673	8.50366e-16	1.0267e-14	ENSG00000180011	down	YES
21724.4	1.49631	0.18597	8.04597	8.55638e-16	1.03249e-14	ENSG00000215012	up	YES
87.3386	3.36102	0.417858	8.04344	8.73484e-16	1.05343e-14	ENSG00000223749	up	YES
486.231	5.71454	0.710614	8.04169	8.86083e-16	1.06745e-14	ENSG00000168065	up	YES
21946.5	-5.21097	0.647994	-8.04169	8.861e-16	1.06745e-14	ENSG00000203685	down	YES
72.7977	-4.60584	0.572814	-8.04071	8.93165e-16	1.07497e-14	ENSG00000112232	down	YES
15669.5	1.8142	0.225627	8.04069	8.93348e-16	1.07497e-14	ENSG00000088451	up	YES
30.8894	3.89462	0.484428	8.03961	9.0123e-16	1.08385e-14	ENSG00000147697	up	YES
29.684	-3.85163	0.479115	-8.03906	9.05311e-16	1.08815e-14	ENSG00000257194	down	YES
3297.55	-2.76363	0.343794	-8.03863	9.08485e-16	1.09135e-14	ENSG00000175600	down	YES
7385.15	1.84804	0.229922	8.03769	9.15497e-16	1.09916e-14	ENSG00000170293	up	YES
17745	1.7213	0.214168	8.03716	9.19449e-16	1.10329e-14	ENSG00000108479	up	YES
450.299	4.77759	0.594489	8.03647	9.24652e-16	1.10891e-14	ENSG00000104899	up	YES
99141.2	1.7332	0.2157	8.03521	9.3417e-16	1.1197e-14	ENSG00000167291	up	YES
65.6201	-2.26441	0.281882	-8.03316	9.49907e-16	1.13793e-14	ENSG00000271474	down	YES
503164	1.12277	0.139819	8.03023	9.72903e-16	1.16483e-14	ENSG00000170515	up	YES
10799.3	2.07051	0.257928	8.02749	9.94911e-16	1.18985e-14	ENSG00000138778	up	YES
369.277	4.40224	0.548394	8.0275	9.94787e-16	1.18985e-14	ENSG00000279692	up	YES
127878	-2.51154	0.312982	-8.02456	1.01887e-15	1.21783e-14	ENSG00000158201	down	YES
3595.03	-3.88436	0.484128	-8.02342	1.02842e-15	1.22856e-14	ENSG00000108823	down	YES
186.506	-3.70682	0.462227	-8.01948	1.06193e-15	1.26788e-14	ENSG00000047936	down	YES
20910.5	1.25322	0.1563	8.01806	1.07431e-15	1.28194e-14	ENSG00000166881	up	YES
3295.59	-4.06592	0.507176	-8.01679	1.08548e-15	1.29456e-14	ENSG00000100448	down	YES
10295	-2.89004	0.360539	-8.01587	1.09359e-15	1.3035e-14	ENSG00000092096	down	YES
171194	1.20793	0.150714	8.01467	1.10434e-15	1.31559e-14	ENSG00000134684	up	YES
113877	2.05606	0.256565	8.01379	1.11224e-15	1.32427e-14	ENSG00000120889	up	YES
246.21	3.23474	0.403711	8.01251	1.12389e-15	1.33739e-14	ENSG00000230461	up	YES
65900.9	1.50005	0.187228	8.01192	1.12928e-15	1.34307e-14	ENSG00000173852	up	YES
3966.67	-3.53382	0.441085	-8.01164	1.13191e-15	1.34545e-14	ENSG00000136274	down	YES
64.8543	-5.22998	0.652885	-8.01057	1.14179e-15	1.35643e-14	ENSG00000224968	down	YES
31414.4	-1.43704	0.179415	-8.00958	1.15098e-15	1.36659e-14	ENSG00000143409	down	YES
37720.3	1.07535	0.134281	8.00818	1.16419e-15	1.38076e-14	ENSG00000095002	up	YES
577875	-3.34405	0.417577	-8.00822	1.1638e-15	1.38076e-14	ENSG00000173597	down	YES
4332.73	1.27371	0.159107	8.00535	1.19131e-15	1.41214e-14	ENSG00000139675	up	YES
747.354	1.62878	0.203466	8.00518	1.19295e-15	1.4133e-14	ENSG00000261061	up	YES
182177	1.17909	0.147328	8.00316	1.21265e-15	1.43585e-14	ENSG00000156471	up	YES
6852.48	1.85736	0.232096	8.00253	1.21885e-15	1.4424e-14	ENSG00000174365	up	YES
2.02377e+06	1.62127	0.202613	8.00184	1.22573e-15	1.44965e-14	ENSG00000241343	up	YES
38792.8	-1.93073	0.241288	-8.00178	1.22633e-15	1.44965e-14	ENSG00000148842	down	YES
129623	1.26799	0.158472	8.00136	1.23056e-15	1.45385e-14	ENSG00000159131	up	YES
721.361	-2.76246	0.345275	-8.00076	1.23651e-15	1.46008e-14	ENSG00000171658	down	YES
444850	-3.65331	0.456644	-8.00035	1.24066e-15	1.46417e-14	ENSG00000145287	down	YES
21568.8	-2.24607	0.28077	-7.99968	1.24747e-15	1.47139e-14	ENSG00000127528	down	YES
25800.2	1.03501	0.129436	7.99632	1.28196e-15	1.51125e-14	ENSG00000075914	up	YES
13296.4	1.59537	0.199523	7.99594	1.28587e-15	1.51502e-14	ENSG00000037897	up	YES
1474.54	1.75217	0.219173	7.99444	1.3016e-15	1.53271e-14	ENSG00000198298	up	YES
79.8535	4.71666	0.590136	7.99249	1.3224e-15	1.55636e-14	ENSG00000277247	up	YES
288.872	-3.828	0.479059	-7.99067	1.34203e-15	1.5786e-14	ENSG00000241684	down	YES
22526.8	-2.67741	0.335088	-7.99017	1.34749e-15	1.58415e-14	ENSG00000182636	down	YES
1751.07	-2.79471	0.349819	-7.98903	1.36008e-15	1.59808e-14	ENSG00000137727	down	YES
154041	2.15491	0.269744	7.9887	1.36369e-15	1.60144e-14	ENSG00000139998	up	YES
128556	1.70983	0.214055	7.98782	1.37349e-15	1.61118e-14	ENSG00000110911	up	YES
500.097	-4.49191	0.562341	-7.98788	1.37284e-15	1.61118e-14	ENSG00000172901	down	YES
5692.8	-5.63923	0.706071	-7.98678	1.38513e-15	1.62395e-14	ENSG00000135447	down	YES
1810.51	-2.66151	0.333245	-7.98664	1.38662e-15	1.62481e-14	ENSG00000164236	down	YES
1486.14	-3.92388	0.491387	-7.98532	1.40155e-15	1.64141e-14	ENSG00000259459	down	YES
17.0426	3.93641	0.49302	7.98427	1.41359e-15	1.65461e-14	ENSG00000203446	up	YES
27.6733	-3.33264	0.417443	-7.98346	1.42284e-15	1.66453e-14	ENSG00000248211	down	YES
76625.3	-1.86278	0.233401	-7.98101	1.45146e-15	1.69709e-14	ENSG00000120162	down	YES
8451.69	-2.91311	0.36504	-7.98026	1.46023e-15	1.70641e-14	ENSG00000126947	down	YES
42244.1	-3.82387	0.479194	-7.9798	1.46576e-15	1.71195e-14	ENSG00000240771	down	YES
909991	-3.31668	0.415755	-7.9775	1.49332e-15	1.74319e-14	ENSG00000152583	down	YES
13364.9	1.49335	0.187203	7.97716	1.49743e-15	1.74703e-14	ENSG00000204946	up	YES
31.0885	-3.71261	0.465485	-7.97578	1.51421e-15	1.76565e-14	ENSG00000185737	down	YES
42508	1.35666	0.170108	7.97531	1.52003e-15	1.77147e-14	ENSG00000138442	up	YES
92660.7	1.04595	0.131155	7.9749	1.52507e-15	1.77638e-14	ENSG00000070770	up	YES
713.364	4.29342	0.538558	7.97206	1.56047e-15	1.81663e-14	ENSG00000039139	up	YES
202128	-3.01365	0.378108	-7.97034	1.58235e-15	1.8411e-14	ENSG00000172828	down	YES
20858.9	-2.70773	0.339747	-7.96986	1.5886e-15	1.84737e-14	ENSG00000136732	down	YES
27.1103	-4.77028	0.598971	-7.96412	1.66403e-15	1.93404e-14	ENSG00000185290	down	YES
785.849	-3.04955	0.382951	-7.9633	1.67515e-15	1.94591e-14	ENSG00000152932	down	YES
77.6132	3.53573	0.444073	7.96205	1.69218e-15	1.96463e-14	ENSG00000180869	up	YES
2581.38	-2.89705	0.363868	-7.96183	1.69513e-15	1.96699e-14	ENSG00000282608	down	YES
279464	1.32239	0.166159	7.95859	1.74012e-15	2.01811e-14	ENSG00000124226	up	YES
2885.41	-3.15316	0.39623	-7.95791	1.74968e-15	2.0281e-14	ENSG00000183134	down	YES
286.691	5.7073	0.717241	7.95729	1.75842e-15	2.03712e-14	ENSG00000141579	up	YES
2348.65	2.01129	0.252773	7.95688	1.76436e-15	2.04291e-14	ENSG00000187961	up	YES
9859.54	-3.53021	0.44384	-7.95379	1.80893e-15	2.09338e-14	ENSG00000153902	down	YES
7542.03	1.13235	0.142381	7.95296	1.82107e-15	2.1063e-14	ENSG00000213588	up	YES
5784.7	1.72108	0.216422	7.95246	1.8285e-15	2.11375e-14	ENSG00000134222	up	YES
23660.5	0.830056	0.104387	7.95169	1.83977e-15	2.12564e-14	ENSG00000176102	up	YES
59086.4	-1.58918	0.199867	-7.95119	1.84727e-15	2.13307e-14	ENSG00000068383	down	YES
54722.7	1.8515	0.23286	7.95113	1.84819e-15	2.13307e-14	ENSG00000100814	up	YES
265.098	-4.14313	0.521105	-7.95065	1.85532e-15	2.14015e-14	ENSG00000180592	down	YES
17300.6	1.19086	0.149822	7.9485	1.8879e-15	2.17656e-14	ENSG00000103042	up	YES
522.06	-2.90104	0.365097	-7.94595	1.92703e-15	2.22049e-14	ENSG00000229155	down	YES
15625.4	2.22636	0.280199	7.94563	1.93202e-15	2.22503e-14	ENSG00000112984	up	YES
906.702	4.21423	0.530689	7.94104	2.00486e-15	2.30768e-14	ENSG00000279508	up	YES
5967.91	-1.96499	0.247501	-7.93935	2.03246e-15	2.3382e-14	ENSG00000136305	down	YES
1659.13	-4.81117	0.606096	-7.93797	2.05515e-15	2.3605e-14	ENSG00000149575	down	YES
26.4602	-3.53186	0.444932	-7.93798	2.055e-15	2.3605e-14	ENSG00000164756	down	YES
6060.79	1.9214	0.242049	7.93804	2.05398e-15	2.3605e-14	ENSG00000204410	up	YES
20999.9	4.7617	0.599878	7.93779	2.0582e-15	2.36275e-14	ENSG00000269821	up	YES
110395	0.93254	0.117514	7.93558	2.09519e-15	2.40392e-14	ENSG00000160803	up	YES
117.59	2.97566	0.375	7.93508	2.10352e-15	2.41219e-14	ENSG00000197191	up	YES
47705	1.43671	0.181061	7.93492	2.10629e-15	2.41408e-14	ENSG00000132680	up	YES
594.272	2.35825	0.297285	7.93264	2.14532e-15	2.4575e-14	ENSG00000180071	up	YES
721523	-2.90755	0.366627	-7.93053	2.18221e-15	2.49843e-14	ENSG00000136826	down	YES
14209.9	-2.53338	0.319483	-7.92964	2.19779e-15	2.51492e-14	ENSG00000145687	down	YES
19478.7	2.17866	0.274767	7.92912	2.20704e-15	2.52416e-14	ENSG00000066279	up	YES
31242.9	3.05372	0.385241	7.92678	2.24908e-15	2.57087e-14	ENSG00000075275	up	YES
3834.11	-1.65017	0.208198	-7.92593	2.26442e-15	2.58703e-14	ENSG00000156050	down	YES
3442.28	1.42315	0.179573	7.9252	2.27783e-15	2.60097e-14	ENSG00000183763	up	YES
424418	-1.40973	0.177916	-7.92359	2.30755e-15	2.6335e-14	ENSG00000102882	down	YES
258.862	2.57225	0.324637	7.92349	2.3094e-15	2.63421e-14	ENSG00000234231	up	YES
504.845	-2.84633	0.35925	-7.92298	2.31883e-15	2.64357e-14	ENSG00000245025	down	YES
71.9789	-5.89325	0.7439	-7.9221	2.33533e-15	2.66096e-14	ENSG00000222375	down	YES
104.354	-3.81222	0.481242	-7.92164	2.34405e-15	2.66948e-14	ENSG00000164841	down	YES
2625.97	2.55329	0.322333	7.92127	2.35105e-15	2.67603e-14	ENSG00000132000	up	YES
50646.9	1.83903	0.232209	7.91971	2.38069e-15	2.70833e-14	ENSG00000137804	up	YES
39583.8	0.910795	0.115016	7.91883	2.39763e-15	2.72617e-14	ENSG00000115761	up	YES
253043	-1.44294	0.182242	-7.91775	2.41853e-15	2.74846e-14	ENSG00000134352	down	YES
4806.04	2.73511	0.345623	7.91356	2.50134e-15	2.84032e-14	ENSG00000138411	up	YES
10894.9	1.17631	0.148646	7.91353	2.502e-15	2.84032e-14	ENSG00000162139	up	YES
249363	1.13089	0.142941	7.91156	2.54192e-15	2.88411e-14	ENSG00000130309	up	YES
3958.71	7.54256	0.953382	7.91138	2.54561e-15	2.88677e-14	ENSG00000159217	up	YES
499214	1.80296	0.227938	7.90985	2.57696e-15	2.92078e-14	ENSG00000184216	up	YES
6801.54	-2.16331	0.273498	-7.90978	2.57849e-15	2.92097e-14	ENSG00000153790	down	YES
49933.7	1.79094	0.226425	7.90964	2.58141e-15	2.92273e-14	ENSG00000168268	up	YES
2.71433e+06	-4.29164	0.542687	-7.90814	2.61269e-15	2.95659e-14	ENSG00000079308	down	YES
166.992	3.49409	0.441919	7.90661	2.64492e-15	2.99149e-14	ENSG00000176244	up	YES
154.326	4.2207	0.533924	7.90505	2.67816e-15	3.0275e-14	ENSG00000176402	up	YES
471452	1.18809	0.150311	7.90424	2.69579e-15	3.04582e-14	ENSG00000155096	up	YES
177902	-1.51128	0.191206	-7.90392	2.70258e-15	3.05188e-14	ENSG00000116729	down	YES
21195	5.41201	0.68473	7.90385	2.7042e-15	3.0521e-14	ENSG00000166415	up	YES
12016.3	1.38731	0.175561	7.90214	2.74147e-15	3.09255e-14	ENSG00000185420	up	YES
556.074	6.81906	0.862973	7.90182	2.74859e-15	3.09895e-14	ENSG00000182968	up	YES
813820	1.20449	0.152441	7.90134	2.75913e-15	3.10919e-14	ENSG00000163468	up	YES
9202.93	1.22639	0.155216	7.90114	2.76368e-15	3.11269e-14	ENSG00000131697	up	YES
486.777	-2.5965	0.328699	-7.89933	2.80396e-15	3.1564e-14	ENSG00000118402	down	YES
110738	1.00398	0.127105	7.89886	2.8146e-15	3.16672e-14	ENSG00000033050	up	YES
3308.6	2.22848	0.282258	7.89522	2.8981e-15	3.25896e-14	ENSG00000152056	up	YES
1.05536e+06	-1.42558	0.180576	-7.89463	2.91189e-15	3.27275e-14	ENSG00000162909	down	YES
57.4511	-3.16022	0.400471	-7.89125	2.9918e-15	3.36081e-14	ENSG00000263508	down	YES
11775.4	2.90106	0.367673	7.89034	3.0137e-15	3.38363e-14	ENSG00000143333	up	YES
4212.27	6.84159	0.867232	7.889	3.04616e-15	3.41829e-14	ENSG00000250641	up	YES
4640.86	2.5442	0.322518	7.88855	3.05717e-15	3.42885e-14	ENSG00000152413	up	YES
9800.67	-2.55088	0.323393	-7.88788	3.07355e-15	3.44495e-14	ENSG00000152284	down	YES
22356.4	2.10718	0.267143	7.88784	3.07473e-15	3.44495e-14	ENSG00000104524	up	YES
1774.91	-2.77325	0.351594	-7.88765	3.07934e-15	3.4474e-14	ENSG00000175287	down	YES
1.1222e+06	-2.24544	0.284679	-7.88762	3.08013e-15	3.4474e-14	ENSG00000075142	down	YES
2134.14	-2.60565	0.330351	-7.88752	3.08247e-15	3.44822e-14	ENSG00000259330	down	YES
17601.6	1.57453	0.199659	7.8861	3.11775e-15	3.48587e-14	ENSG00000135763	up	YES
8248.62	1.57719	0.200038	7.88445	3.15918e-15	3.53035e-14	ENSG00000135749	up	YES
58.4084	3.99498	0.506855	7.88189	3.22469e-15	3.60168e-14	ENSG00000166961	up	YES
492014	-4.56018	0.578592	-7.88152	3.23429e-15	3.61054e-14	ENSG00000280143	down	YES
145423	1.28954	0.16365	7.87984	3.27809e-15	3.65752e-14	ENSG00000115866	up	YES
4408.05	1.4258	0.181008	7.87698	3.3539e-15	3.74016e-14	ENSG00000140104	up	YES
5886.07	4.59122	0.582956	7.87576	3.38678e-15	3.77487e-14	ENSG00000186377	up	YES
5.45351e+06	-4.54307	0.576922	-7.87467	3.41649e-15	3.80601e-14	ENSG00000198467	down	YES
233310	-1.99497	0.253367	-7.87383	3.43936e-15	3.8295e-14	ENSG00000121858	down	YES
611.412	1.93071	0.245244	7.87261	3.47305e-15	3.86501e-14	ENSG00000187801	up	YES
131350	2.03993	0.259208	7.86983	3.55135e-15	3.95009e-14	ENSG00000132182	up	YES
1745.46	2.11296	0.268539	7.86834	3.5938e-15	3.99524e-14	ENSG00000088305	up	YES
178902	-1.33669	0.169913	-7.86688	3.63608e-15	4.03806e-14	ENSG00000186350	down	YES
2064.58	1.57991	0.20083	7.86689	3.63568e-15	4.03806e-14	ENSG00000280206	up	YES
19802.7	1.53111	0.19464	7.86633	3.65207e-15	4.05373e-14	ENSG00000117385	up	YES
185343	1.17894	0.149876	7.86609	3.65896e-15	4.05928e-14	ENSG00000138430	up	YES
25.5135	-3.9487	0.502004	-7.86587	3.66536e-15	4.06427e-14	ENSG00000224318	down	YES
4916.97	-4.12117	0.523938	-7.86577	3.66843e-15	4.06558e-14	ENSG00000186715	down	YES
2579.21	-2.79543	0.355549	-7.8623	3.77158e-15	4.17773e-14	ENSG00000105784	down	YES
233501	-2.02963	0.258233	-7.85971	3.85015e-15	4.26256e-14	ENSG00000171992	down	YES
19965	2.35156	0.299272	7.85761	3.91544e-15	4.33262e-14	ENSG00000114251	up	YES
547.49	3.03495	0.386344	7.85555	3.98009e-15	4.40189e-14	ENSG00000188368	up	YES
45359.7	2.44764	0.311718	7.85209	4.09156e-15	4.52284e-14	ENSG00000223705	up	YES
3098.74	-3.61078	0.459962	-7.85016	4.15497e-15	4.59057e-14	ENSG00000108852	down	YES
49931.5	-1.19733	0.152558	-7.84838	4.21459e-15	4.65404e-14	ENSG00000171055	down	YES
1356.16	5.65586	0.72095	7.84501	4.32921e-15	4.77815e-14	ENSG00000134812	up	YES
507.488	2.46324	0.314053	7.84339	4.3853e-15	4.83758e-14	ENSG00000256663	up	YES
134099	-1.48277	0.189098	-7.8413	4.45917e-15	4.91654e-14	ENSG00000118564	down	YES
16803.4	1.6269	0.207513	7.84001	4.50517e-15	4.96471e-14	ENSG00000138182	up	YES
58405.9	8.26178	1.05388	7.83937	4.52806e-15	4.98737e-14	ENSG00000200087	up	YES
7207.95	1.17189	0.149531	7.83713	4.60979e-15	5.07478e-14	ENSG00000010539	up	YES
1526.77	-2.2693	0.289566	-7.8369	4.61807e-15	5.0813e-14	ENSG00000100739	down	YES
166.818	-3.66475	0.467674	-7.83611	4.64717e-15	5.1107e-14	ENSG00000166473	down	YES
11182.3	3.31031	0.422586	7.83347	4.74601e-15	5.21672e-14	ENSG00000181218	up	YES
78945.5	-1.9548	0.249591	-7.83199	4.80207e-15	5.27564e-14	ENSG00000164442	down	YES
106.058	-3.25386	0.415561	-7.83004	4.87705e-15	5.35527e-14	ENSG00000122733	down	YES
188202	-1.31673	0.16817	-7.82977	4.88764e-15	5.36416e-14	ENSG00000126107	down	YES
629.718	-2.31525	0.295741	-7.82863	4.93226e-15	5.41037e-14	ENSG00000152953	down	YES
833.014	-3.36394	0.42979	-7.82694	4.99901e-15	5.48079e-14	ENSG00000156475	down	YES
60828.2	-2.22943	0.284857	-7.82649	5.01672e-15	5.49739e-14	ENSG00000197375	down	YES
17646.4	1.08892	0.13917	7.8244	5.10079e-15	5.58667e-14	ENSG00000161036	up	YES
950371	-1.98175	0.253304	-7.82359	5.13363e-15	5.61977e-14	ENSG00000121900	down	YES
36978.4	2.56346	0.327674	7.8232	5.14956e-15	5.63224e-14	ENSG00000159423	up	YES
433.247	2.37138	0.303122	7.82319	5.15027e-15	5.63224e-14	ENSG00000167550	up	YES
10108.5	1.13531	0.145127	7.82288	5.16271e-15	5.64296e-14	ENSG00000166860	up	YES
51877.6	-1.94908	0.249193	-7.82157	5.21686e-15	5.69926e-14	ENSG00000141447	down	YES
623.25	-2.66585	0.340857	-7.82103	5.2393e-15	5.72086e-14	ENSG00000155970	down	YES
5106.8	1.97263	0.252263	7.81974	5.29332e-15	5.7769e-14	ENSG00000198208	up	YES
61956.2	1.22976	0.15727	7.81942	5.30674e-15	5.7886e-14	ENSG00000153574	up	YES
206.035	3.42252	0.437965	7.81461	5.51356e-15	6.01115e-14	ENSG00000125531	up	YES
1719.1	1.78919	0.22899	7.81341	5.5661e-15	6.06536e-14	ENSG00000273045	up	YES
301.199	-4.65833	0.596428	-7.81037	5.70206e-15	6.21036e-14	ENSG00000144847	down	YES
119503	5.9137	0.757368	7.80823	5.79955e-15	6.31333e-14	ENSG00000106236	up	YES
163087	-0.569081	0.0728836	-7.80807	5.80681e-15	6.31803e-14	ENSG00000132155	down	YES
1.27786e+06	2.25414	0.288724	7.80724	5.84519e-15	6.35656e-14	ENSG00000064651	up	YES
149659	2.67729	0.342942	7.80683	5.86426e-15	6.37408e-14	ENSG00000141756	up	YES
803.369	-3.87812	0.496857	-7.8053	5.93624e-15	6.44905e-14	ENSG00000240505	down	YES
78567.7	1.42971	0.183196	7.80427	5.98462e-15	6.49832e-14	ENSG00000116649	up	YES
55230.4	-1.40948	0.180708	-7.79977	6.20206e-15	6.73102e-14	ENSG00000250021	down	YES
114148	0.666349	0.0854355	7.79944	6.21808e-15	6.74499e-14	ENSG00000111605	up	YES
5611.45	2.53289	0.324778	7.79883	6.24816e-15	6.77421e-14	ENSG00000102878	up	YES
267441	1.39748	0.179203	7.79833	6.27341e-15	6.79815e-14	ENSG00000164889	up	YES
54241.6	1.02494	0.131442	7.79768	6.30564e-15	6.82962e-14	ENSG00000058600	up	YES
12494.5	1.30881	0.167855	7.79726	6.32635e-15	6.84861e-14	ENSG00000070718	up	YES
478682	-2.21986	0.284776	-7.79513	6.43424e-15	6.96189e-14	ENSG00000111802	down	YES
2489.35	-3.18627	0.408872	-7.79284	6.5519e-15	7.08563e-14	ENSG00000182916	down	YES
198968	1.11826	0.143517	7.79182	6.6053e-15	7.13978e-14	ENSG00000166986	up	YES
19774.1	2.56514	0.329248	7.79091	6.65263e-15	7.18636e-14	ENSG00000142185	up	YES
42996.1	0.955405	0.122631	7.79087	6.65509e-15	7.18636e-14	ENSG00000125450	up	YES
272351	1.31637	0.168975	7.79032	6.68411e-15	7.21407e-14	ENSG00000198176	up	YES
105854	-1.31596	0.168924	-7.79024	6.68799e-15	7.21463e-14	ENSG00000100014	down	YES
161.497	-4.34886	0.558252	-7.79013	6.69378e-15	7.21725e-14	ENSG00000163518	down	YES
91912.4	-1.3248	0.170085	-7.78903	6.75238e-15	7.27677e-14	ENSG00000143891	down	YES
31017.9	-1.7069	0.219149	-7.78874	6.76797e-15	7.28992e-14	ENSG00000070778	down	YES
463.598	-2.96054	0.380122	-7.78838	6.78719e-15	7.3037e-14	ENSG00000263961	down	YES
37739.4	0.989672	0.12707	7.78838	6.78758e-15	7.3037e-14	ENSG00000006194	up	YES
225221	-2.14711	0.275794	-7.78519	6.96075e-15	7.48629e-14	ENSG00000139567	down	YES
118776	-3.67621	0.472358	-7.78267	7.10078e-15	7.63307e-14	ENSG00000124491	down	YES
6593.25	-3.71695	0.47761	-7.78239	7.11679e-15	7.64645e-14	ENSG00000172137	down	YES
698.13	-2.89212	0.37185	-7.77764	7.38907e-15	7.93503e-14	ENSG00000198785	down	YES
[truncated: 19,468 more rows]
