# Supplementary material
Source: Research Square preprint supplement (doi:10.21203/rs.3.rs-9763213/v1)
Supplement: Supplementary file 1 [file 2ff621c1581e8aec1e37e28a.pdf]

A

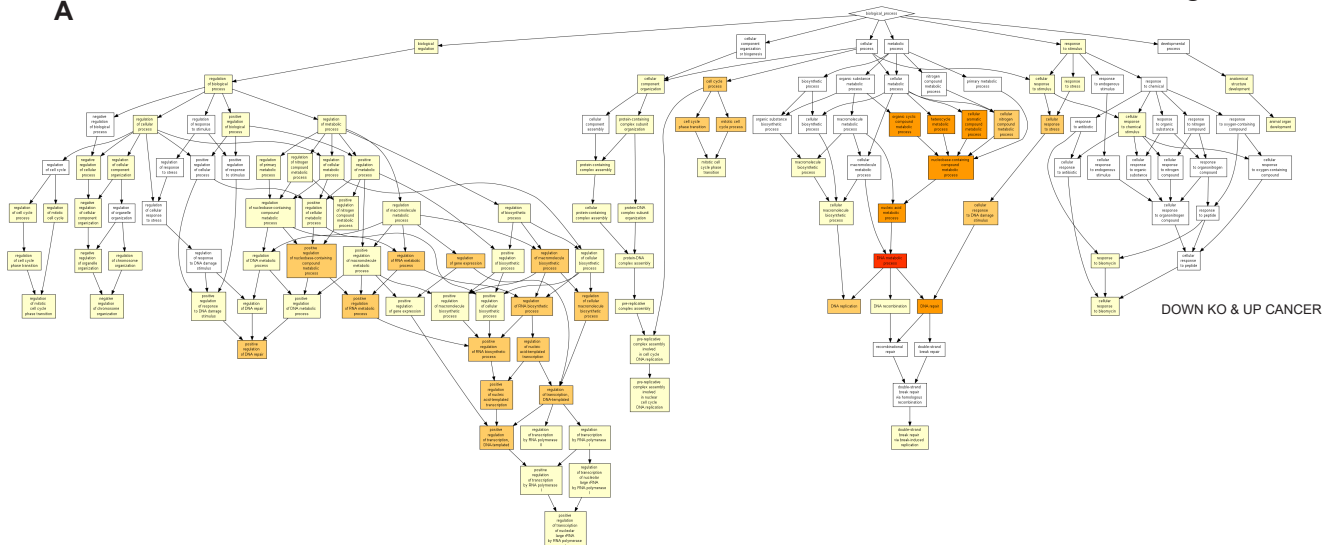

DOWN KO & UP CANCER

B

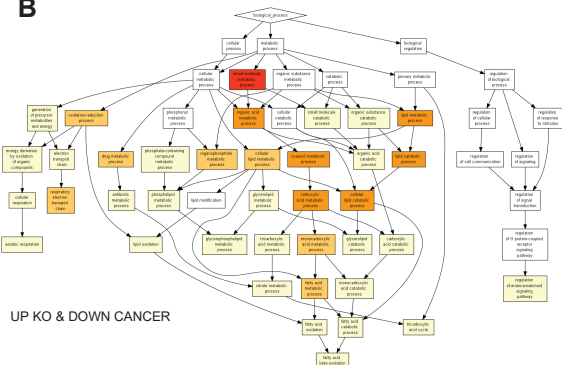

UP KO & DOWN CANCER

C

DOWN KO & UP CANCER

|                                              |                                                                        |                                                                   |                                                                         |                                                               |                                                    |
|----------------------------------------------|------------------------------------------------------------------------|-------------------------------------------------------------------|-------------------------------------------------------------------------|---------------------------------------------------------------|----------------------------------------------------|
| (GO0006281)<br>DNA repair                    | (GO000727)<br>double strand break repair via break induced replication | (GO0006198)<br>nucleobase-containing compound metabolic process   | (GO0006152)<br>metabolic process                                        | (GO0022402)<br>cell cycle process                             | (GO0035388)<br>pre-replicative complex assembly    |
| (GO0006259)<br>DNA metabolic process         | (GO0090304)<br>nucleic acid metabolic process                          | (GO0045893)<br>positive regulation of DNA-templated transcription | (GO0006356)<br>regulation of transcription by RNA polymerase            | (GO0006357)<br>transcription by RNA polymerase I              | (GO0045739)<br>positive regulation of DNA repair   |
| (GO0006268)<br>DNA replication               | (GO1904875)<br>response to bleomycin                                   | (GO1904876)<br>cellular response to bleomycin                     | (GO0045943)<br>positive regulation of transcription by RNA polymerase I | (GO1901987)<br>regulation of cell cycle phase transition      | (GO0065003)<br>protein-containing complex assembly |
| (GO0051716)<br>cellular response to stimulus |                                                                        |                                                                   | (GO0050794)<br>regulation of cellular process                           | (GO2001251)<br>negative regulation of chromosome organization |                                                    |

UP KO & DOWN CANCER

|                                                 |                                        |                                                               |                                                     |                                                                |                                                  |
|-------------------------------------------------|----------------------------------------|---------------------------------------------------------------|-----------------------------------------------------|----------------------------------------------------------------|--------------------------------------------------|
| (GO0016042)<br>lipid catabolic process          | (GO0006629)<br>lipid metabolic process | (GO0032787)<br>monocarboxylic acid metabolic process          | (GO0006101)<br>citrate metabolic process            | (GO0006805)<br>xenobiotic metabolic process                    | (GO0019637)<br>organophosphate metabolic process |
|                                                 |                                        | (GO0006082)<br>organic acid metabolic process                 |                                                     |                                                                |                                                  |
| (GO0044242)<br>cellular lipid catabolic process |                                        | (GO0006091)<br>generation of precursor metabolites and energy | (GO0022904)<br>respiratory electron transport chain | (GO0072350)<br>tricarboxylic acid metabolic process            |                                                  |
| (GO0016999)<br>antibiotic metabolic process     |                                        | (GO0044261)<br>small molecule metabolic process               |                                                     | (GO0001124)<br>regulation of endocannabinoid signaling pathway |                                                  |
