# Supplementary material
Source: Research Square preprint supplement (doi:10.21203/rs.3.rs-9763213/v1)
Supplement: Supplementary file 2 [file 3c0d267d507aeb5d8f434689.xlsx]

## Sheet: survival_test
sample	X_PATIENT	OS	OS.time	DSS	DSS.time	DFI	DFI.time	PFI	PFI.time	Redaction	Ratio_H3K14ac_H3K9me2	CMS	Microsatellite_inestability	postoperative_rx_tx	group
TCGA-F4-6805-01	TCGA-F4-6805	0	1047	0	1047	0	1047	0	1047	NA	0.0970625	CMS4	MSS	YES	HIGH
TCGA-A6-2675-01	TCGA-A6-2675	0	1321	0	1321	0	1321	0	1321	NA	0.0956745	CMS4	MSS	NO	HIGH
TCGA-A6-A565-01	TCGA-A6-A565	1	494	1	494	NA	NA	1	301	NA	0.0955994	CMS4	MSI-L	YES	HIGH
TCGA-CM-6168-01	TCGA-CM-6168	0	395	0	395	NA	NA	0	395	NA	0.0938807	CMS4	MSI-L	NO	HIGH
TCGA-D5-6534-01	TCGA-D5-6534	0	1316	0	1316	0	1316	0	1316	NA	0.0936776	CMS4	MSS	NO	HIGH
TCGA-G4-6627-01	TCGA-G4-6627	0	2275	0	2275	1	1003	1	1003	NA	0.090615	CMS4	MSI-L	NO	HIGH
TCGA-G4-6625-01	TCGA-G4-6625	0	2792	0	2792	NA	NA	1	2564	NA	0.0894371	NOLBL	MSS	NO	HIGH
TCGA-AZ-4323-01	TCGA-AZ-4323	1	43	1	43	NA	NA	1	43	NA	0.0865882	CMS4	MSI-L	YES	HIGH
TCGA-A6-6649-01	TCGA-A6-6649	0	735	0	735	0	735	0	735	NA	0.086044	NOLBL	MSS	YES	HIGH
TCGA-F4-6460-01	TCGA-F4-6460	1	972	1	972	1	313	1	313	NA	0.0856761	CMS4	MSS	YES	HIGH
TCGA-AA-3713-01	TCGA-AA-3713	0	579	0	579	NA	NA	0	579	NA	0.0842734	CMS1	MSI-H	YES	HIGH
TCGA-F4-6459-01	TCGA-F4-6459	1	262	0	262	NA	NA	0	262	NA	0.0818642	CMS4	MSS	NO	HIGH
TCGA-D5-6539-01	TCGA-D5-6539	0	380	0	380	NA	NA	0	380	NA	0.0815412	CMS3	MSS	NO	HIGH
TCGA-CM-6172-01	TCGA-CM-6172	0	335	0	335	NA	NA	0	335	NA	0.0796361	CMS2	MSS	YES	HIGH
TCGA-G4-6321-01	TCGA-G4-6321	0	672	0	672	NA	NA	0	672	NA	0.0791033	NOLBL	MSI-L	YES	HIGH
TCGA-CM-6162-01	TCGA-CM-6162	0	365	0	365	NA	NA	0	365	NA	0.0719129	CMS4	MSI-H	YES	HIGH
TCGA-CA-6717-01	TCGA-CA-6717	0	388	0	388	0	388	0	388	NA	0.0714863	CMS4	MSS	YES	HIGH
TCGA-A6-6782-01	TCGA-A6-6782	0	617	0	617	0	617	0	617	NA	0.0714777	CMS4	MSS	NO	HIGH
TCGA-A6-5664-01	TCGA-A6-5664	0	672	0	672	NA	NA	1	183	NA	0.0714191	CMS4	MSS	NO	HIGH
TCGA-CM-6167-01	TCGA-CM-6167	0	456	0	456	NA	NA	0	456	NA	0.0695263	CMS4	MSS	YES	HIGH
TCGA-CM-6169-01	TCGA-CM-6169	0	396	0	396	NA	NA	0	396	NA	0.0688846	CMS4	MSS	YES	HIGH
TCGA-A6-6651-01	TCGA-A6-6651	0	662	0	662	NA	NA	0	662	NA	0.0681153	CMS4	MSS	NO	HIGH
TCGA-G4-6628-01	TCGA-G4-6628	0	2424	0	2424	0	2424	0	2424	NA	0.0679571	CMS1	MSI-H	NO	HIGH
TCGA-AZ-6600-01	TCGA-AZ-6600	1	368	1	368	NA	NA	1	368	NA	0.0653429	CMS4	MSS	YES	HIGH
TCGA-DM-A285-01	TCGA-DM-A285	1	179	NA	179	NA	NA	0	179	NA	0.0651455	NOLBL	MSS	NO	HIGH
TCGA-D5-5539-01	TCGA-D5-5539	0	596	0	596	NA	NA	1	579	NA	0.0632162	NOLBL	MSS	YES	HIGH
TCGA-F4-6809-01	TCGA-F4-6809	1	403	1	403	NA	NA	1	403	NA	0.0622375	CMS4	MSS	NO	HIGH
TCGA-A6-A566-01	TCGA-A6-A566	1	758	1	758	NA	NA	1	257	NA	0.0614654	CMS4	MSI-L	YES	HIGH
TCGA-D5-6931-01	TCGA-D5-6931	0	365	0	365	NA	NA	0	365	NA	0.0613369	CMS1	MSS	NO	HIGH
TCGA-D5-6928-01	TCGA-D5-6928	0	354	0	354	NA	NA	0	354	NA	0.0600849	CMS1	MSI-H	NO	HIGH
TCGA-F4-6569-01	TCGA-F4-6569	0	1087	0	1087	0	1087	0	1087	NA	0.0595787	CMS4	MSS	YES	HIGH
TCGA-D5-6924-01	TCGA-D5-6924	0	435	0	435	NA	NA	0	435	NA	0.0594986	CMS4	MSS	NO	HIGH
TCGA-G4-6302-01	TCGA-G4-6302	1	2047	0	2047	NA	NA	0	2047	NA	0.0589559	CMS4	MSI-H	NO	HIGH
TCGA-AZ-6605-01	TCGA-AZ-6605	1	159	0	159	NA	NA	0	159	NA	0.057533	CMS4	MSS	YES	HIGH
TCGA-CM-6165-01	TCGA-CM-6165	0	488	0	488	NA	NA	0	488	NA	0.0541212	CMS4	MSS	NO	HIGH
TCGA-CM-4751-01	TCGA-CM-4751	0	822	0	822	0	822	0	822	NA	0.0539058	NOLBL	MSS	YES	HIGH
TCGA-CM-5348-01	TCGA-CM-5348	0	699	0	699	NA	NA	0	699	NA	0.0532041	CMS4	MSS	NO	HIGH
TCGA-A6-6142-01	TCGA-A6-6142	0	763	0	763	NA	NA	1	654	NA	0.0525939	CMS4	MSS	YES	HIGH
TCGA-D5-6920-01	TCGA-D5-6920	0	377	0	377	NA	NA	0	377	NA	0.0511854	CMS3	MSS	NO	HIGH
TCGA-F4-6461-01	TCGA-F4-6461	1	338	1	338	NA	NA	1	288	NA	0.0509689	CMS4	MSS	NO	HIGH
TCGA-AA-3660-01	TCGA-AA-3660	0	2375	0	2375	0	2375	0	2375	NA	0.0509339	CMS2	MSS	NO	HIGH
TCGA-A6-6654-01	TCGA-A6-6654	0	726	0	726	0	726	0	726	NA	0.0492025	CMS4	MSS	YES	HIGH
TCGA-D5-6898-01	TCGA-D5-6898	0	229	0	229	NA	NA	0	229	NA	0.0490744	CMS4	MSS	NO	HIGH
TCGA-CA-5796-01	TCGA-CA-5796	0	377	0	377	0	377	0	377	NA	0.046513	CMS3	MSS	YES	HIGH
TCGA-G4-6299-01	TCGA-G4-6299	0	2268	0	2268	NA	NA	0	2268	NA	0.0458253	CMS1	MSS	YES	HIGH
TCGA-CM-5863-01	TCGA-CM-5863	0	457	0	457	NA	NA	0	457	NA	0.0438278	CMS4	MSS	YES	HIGH
TCGA-F4-6704-01	TCGA-F4-6704	0	47	0	47	NA	NA	0	47	NA	0.0437477	CMS4	MSS	NO	HIGH
TCGA-CA-5254-01	TCGA-CA-5254	0	386	0	386	0	386	0	386	NA	0.0414187	NOLBL	MSI-L	YES	HIGH
TCGA-CA-5797-01	TCGA-CA-5797	0	383	0	383	0	383	0	383	NA	0.0413926	CMS2	MSS	YES	HIGH
TCGA-CK-4948-01	TCGA-CK-4948	0	4502	0	4502	0	4502	0	4502	NA	0.0410721	CMS4	MSI-L	NO	HIGH
TCGA-AD-6899-01	TCGA-AD-6899	1	176	0	176	0	176	0	176	NA	0.040849	CMS4	MSS	NO	HIGH
TCGA-G4-6311-01	TCGA-G4-6311	0	1199	0	1199	NA	NA	0	1199	NA	0.0404762	CMS4	MSS	YES	HIGH
TCGA-CM-6676-01	TCGA-CM-6676	0	337	0	337	NA	NA	0	337	NA	0.040275	CMS2	MSI-L	NO	HIGH
TCGA-D5-6922-01	TCGA-D5-6922	0	308	0	308	NA	NA	0	308	NA	0.0400076	CMS4	MSS	NO	HIGH
TCGA-AZ-6607-01	TCGA-AZ-6607	1	97	1	97	NA	NA	1	97	NA	0.0397111	CMS4	MSS	NO	HIGH
TCGA-A6-6648-01	TCGA-A6-6648	0	766	0	766	NA	NA	1	686	NA	0.0391808	CMS2	MSS	NO	HIGH
TCGA-D5-5541-01	TCGA-D5-5541	0	1701	0	1701	0	1701	0	1701	NA	0.0378666	CMS4	MSS	YES	HIGH
TCGA-AD-6548-01	TCGA-AD-6548	0	650	0	650	0	650	0	650	NA	0.0377426	NOLBL	MSI-L	NO	HIGH
TCGA-CM-6680-01	TCGA-CM-6680	0	366	0	366	NA	NA	0	366	NA	0.0373249	CMS3	MSS	NO	HIGH
TCGA-AA-A01X-01	TCGA-AA-A01X	0	791	0	791	NA	NA	1	791	NA	0.0354687	CMS2	MSS	NO	HIGH
TCGA-AZ-4615-01	TCGA-AZ-4615	0	1002	0	1002	NA	NA	1	688	NA	0.0351848	CMS1	MSI-H	YES	HIGH
TCGA-AA-3489-01	TCGA-AA-3489	1	214	1	214	NA	NA	1	214	NA	0.0350968	CMS4	MSS	NO	HIGH
TCGA-G4-6303-01	TCGA-G4-6303	1	2003	1	2003	NA	NA	1	872	NA	0.0349796	CMS2	MSI-L	NO	HIGH
TCGA-CK-4950-01	TCGA-CK-4950	0	2599	0	2599	0	2599	0	2599	NA	0.0342269	CMS3	MSS	YES	HIGH
TCGA-AA-3712-01	TCGA-AA-3712	0	0	0	0	NA	NA	0	0	NA	0.0307157	CMS2	MSS	NO	HIGH
TCGA-AZ-4684-01	TCGA-AZ-4684	0	1977	0	1977	NA	NA	1	411	NA	0.0302102	NOLBL	MSI-L	NO	HIGH
TCGA-F4-6856-01	TCGA-F4-6856	0	1074	0	1074	0	1074	0	1074	NA	0.0295509	CMS3	MSI-H	YES	HIGH
TCGA-CM-5349-01	TCGA-CM-5349	0	915	0	915	NA	NA	0	915	NA	0.0285188	CMS4	MSS	NO	HIGH
TCGA-F4-6855-01	TCGA-F4-6855	0	1442	0	1442	0	1442	0	1442	NA	0.028056	CMS4	MSI-L	NO	HIGH
TCGA-AA-3506-01	TCGA-AA-3506	0	1765	0	1765	NA	NA	0	1765	NA	0.0278828	CMS2	MSS	NO	HIGH
TCGA-D5-6930-01	TCGA-D5-6930	0	406	0	406	NA	NA	0	406	NA	0.0273822	CMS1	MSI-H	NO	HIGH
TCGA-A6-6653-01	TCGA-A6-6653	0	742	0	742	0	742	0	742	NA	0.0268297	CMS1	MSI-H	NO	HIGH
TCGA-CA-5256-01	TCGA-CA-5256	0	379	0	379	0	379	0	379	NA	0.0265501	CMS2	MSS	YES	HIGH
TCGA-AU-6004-01	TCGA-AU-6004	0	824	0	824	NA	NA	0	824	NA	0.0261204	CMS1	MSI-H	NO	HIGH
TCGA-CM-6674-01	TCGA-CM-6674	0	394	0	394	NA	NA	0	394	NA	0.0258162	CMS1	MSI-H	NO	HIGH
TCGA-D5-6535-01	TCGA-D5-6535	0	460	0	460	NA	NA	0	460	NA	0.0256122	NOLBL	MSS	NO	HIGH
TCGA-D5-5538-01	TCGA-D5-5538	1	1661	1	1661	NA	NA	1	1007	NA	0.0250524	CMS4	MSS	YES	HIGH
TCGA-AZ-5403-01	TCGA-AZ-5403	1	1910	1	1910	NA	NA	1	304	NA	0.0249757	CMS4	MSS	NO	HIGH
TCGA-AA-3511-01	TCGA-AA-3511	0	212	0	212	1	59	1	59	NA	0.0247706	NOLBL	MSS	NO	HIGH
TCGA-F4-6703-01	TCGA-F4-6703	0	1456	0	1456	0	1456	0	1456	NA	0.02476	CMS4	MSI-H	NO	HIGH
TCGA-AA-3697-01	TCGA-AA-3697	0	2587	0	2587	NA	NA	0	2587	NA	0.0217716	CMS2	MSI-L	NO	HIGH
TCGA-CM-6161-01	TCGA-CM-6161	0	457	0	457	NA	NA	0	457	NA	0.0209707	CMS2	MSI-L	NO	HIGH
TCGA-AD-5900-01	TCGA-AD-5900	0	370	0	370	0	370	0	370	NA	0.0208814	CMS1	MSI-H	NO	HIGH
TCGA-F4-6807-01	TCGA-F4-6807	0	1309	0	1309	0	1309	0	1309	NA	0.0176474	CMS4	MSS	YES	HIGH
TCGA-CK-6747-01	TCGA-CK-6747	0	2523	0	2523	0	2523	0	2523	NA	0.0172247	CMS3	MSI-H	NO	HIGH
TCGA-AD-6895-01	TCGA-AD-6895	0	763	0	763	0	763	0	763	NA	0.0170945	CMS1	MSI-H	NO	HIGH
TCGA-CM-5860-01	TCGA-CM-5860	0	974	0	974	NA	NA	0	974	NA	0.0169711	CMS4	MSS	YES	HIGH
TCGA-F4-6463-01	TCGA-F4-6463	0	1087	0	1087	0	1087	0	1087	NA	0.0168751	CMS4	MSS	NO	HIGH
TCGA-A6-2682-01	TCGA-A6-2682	1	424	1	424	NA	NA	1	381	NA	0.0161472	CMS4	MSS	YES	HIGH
TCGA-A6-6137-01	TCGA-A6-6137	0	824	0	824	0	824	0	824	NA	0.0160981	CMS2	MSS	YES	HIGH
TCGA-G4-6322-01	TCGA-G4-6322	0	792	0	792	NA	NA	1	789	NA	0.0152517	CMS3	MSI-L	YES	HIGH
TCGA-CK-6751-01	TCGA-CK-6751	0	3780	0	3780	NA	NA	0	3780	NA	0.0147772	CMS3	MSS	NO	HIGH
TCGA-D5-6529-01	TCGA-D5-6529	0	614	0	614	NA	NA	1	386	NA	0.0145471	CMS4	MSI-L	NO	HIGH
TCGA-CA-6719-01	TCGA-CA-6719	0	435	0	435	NA	NA	1	354	NA	0.0139618	CMS4	MSI-L	NO	HIGH
TCGA-CM-6677-01	TCGA-CM-6677	0	337	0	337	NA	NA	0	337	NA	0.013801	CMS2	MSS	NO	HIGH
TCGA-CM-6675-01	TCGA-CM-6675	0	397	0	397	NA	NA	1	337	NA	0.0134704	CMS1	MSS	YES	HIGH
TCGA-A6-6780-01	TCGA-A6-6780	0	612	0	612	0	612	0	612	NA	0.012532	CMS1	MSS	NO	HIGH
TCGA-CK-5913-01	TCGA-CK-5913	0	1561	0	1561	0	1561	0	1561	NA	0.0121511	CMS1	MSI-H	NO	HIGH
TCGA-G4-6293-01	TCGA-G4-6293	0	4051	0	4051	0	4051	0	4051	NA	0.011705	CMS2	MSI-L	YES	HIGH
TCGA-A6-5667-01	TCGA-A6-5667	0	887	0	887	0	887	0	887	NA	0.0110937	CMS2	MSS	YES	HIGH
TCGA-CM-6679-01	TCGA-CM-6679	0	306	0	306	NA	NA	0	306	NA	0.0109337	CMS4	MSS	NO	HIGH
TCGA-A6-5656-01	TCGA-A6-5656	0	1001	0	1001	0	1001	0	1001	NA	0.00992092	CMS2	MSS	NO	HIGH
TCGA-D5-6932-01	TCGA-D5-6932	0	346	0	346	NA	NA	0	346	NA	0.00984353	CMS2	MSS	NO	HIGH
TCGA-AA-3495-01	TCGA-AA-3495	0	1127	0	1127	0	1127	0	1127	NA	0.0098274	CMS2	MSS	NO	HIGH
TCGA-CM-5344-01	TCGA-CM-5344	0	670	0	670	NA	NA	0	670	NA	0.00946078	CMS4	MSS	YES	HIGH
TCGA-AA-3509-01	TCGA-AA-3509	0	1915	0	1915	0	1915	0	1915	NA	0.00901685	CMS2	MSS	NO	HIGH
TCGA-CK-5912-01	TCGA-CK-5912	1	1493	0	1493	0	1493	0	1493	NA	0.00862493	CMS2	MSS	NO	LOW
TCGA-CM-5868-01	TCGA-CM-5868	0	518	0	518	NA	NA	0	518	NA	0.0084947	NOLBL	MSS	YES	LOW
TCGA-NH-A50V-01	TCGA-NH-A50V	0	588	0	588	0	588	0	588	NA	0.00765287	CMS4	MSI-L	YES	LOW
TCGA-AZ-6603-01	TCGA-AZ-6603	1	899	0	899	0	899	0	899	NA	0.00726141	CMS2	MSS	NO	LOW
TCGA-AZ-4315-01	TCGA-AZ-4315	0	1776	0	1776	NA	NA	0	1776	NA	0.00715061	NOLBL	MSS	NO	LOW
TCGA-A6-4105-01	TCGA-A6-4105	1	442	0	442	NA	NA	1	364	NA	0.00632078	NOLBL	MSS	NO	LOW
TCGA-A6-6781-01	TCGA-A6-6781	0	598	0	598	0	598	0	598	NA	0.00603019	CMS4	MSS	YES	LOW
TCGA-AY-6386-01	TCGA-AY-6386	0	542	0	542	0	542	0	542	NA	0.00586787	CMS3	MSS	YES	LOW
TCGA-G4-6314-01	TCGA-G4-6314	0	1093	0	1093	NA	NA	1	38	NA	0.00452327	CMS4	MSS	YES	LOW
TCGA-D5-6538-01	TCGA-D5-6538	0	521	0	521	NA	NA	0	521	NA	0.00444461	CMS2	MSI-L	YES	LOW
TCGA-DM-A28G-01	TCGA-DM-A28G	1	1849	NA	1849	NA	NA	0	1849	NA	0.00161126	CMS3	MSS	NO	LOW
TCGA-AZ-6598-01	TCGA-AZ-6598	1	1503	0	1503	0	1503	0	1503	NA	0.00137065	CMS1	MSI-H	NO	LOW
TCGA-AA-3492-01	TCGA-AA-3492	1	92	0	92	NA	NA	0	92	NA	-3.38093e-05	CMS1	MSI-H	NO	LOW
TCGA-CM-4743-01	TCGA-CM-4743	0	701	0	701	0	701	0	701	NA	-0.000209249	CMS1	MSI-H	YES	LOW
TCGA-AD-6965-01	TCGA-AD-6965	0	805	0	805	1	648	1	648	NA	-0.000439589	CMS2	MSS	YES	LOW
TCGA-D5-6929-01	TCGA-D5-6929	0	408	0	408	NA	NA	0	408	NA	-0.000805541	CMS4	MSI-L	YES	LOW
TCGA-D5-6926-01	TCGA-D5-6926	0	275	0	275	NA	NA	0	275	NA	-0.00160188	CMS4	MSS	YES	LOW
TCGA-AA-3655-01	TCGA-AA-3655	0	1856	0	1856	0	1856	0	1856	NA	-0.0017595	CMS3	MSS	NO	LOW
TCGA-AA-3663-01	TCGA-AA-3663	0	212	0	212	0	212	0	212	NA	-0.00220945	CMS3	MSI-H	NO	LOW
TCGA-G4-6309-01	TCGA-G4-6309	0	2600	0	2600	1	2176	1	2176	NA	-0.00245687	CMS3	MSI-H	YES	LOW
TCGA-AA-3502-01	TCGA-AA-3502	0	1065	0	1065	0	1065	0	1065	NA	-0.00276801	CMS3	MSI-L	NO	LOW
TCGA-A6-2677-01	TCGA-A6-2677	1	740	0	740	NA	NA	0	740	NA	-0.00479258	CMS2	MSS	NO	LOW
TCGA-AA-A01P-01	TCGA-AA-A01P	1	1158	1	1158	NA	NA	1	762	NA	-0.00508922	CMS1	MSI-H	NO	LOW
TCGA-A6-5660-01	TCGA-A6-5660	0	888	0	888	0	888	0	888	NA	-0.00524736	CMS2	MSS	YES	LOW
TCGA-AA-3662-01	TCGA-AA-3662	0	184	0	184	NA	NA	0	184	NA	-0.00615059	CMS2	MSS	YES	LOW
TCGA-CM-6166-01	TCGA-CM-6166	0	669	0	669	NA	NA	0	669	NA	-0.00769618	CMS2	MSS	NO	LOW
TCGA-AU-3779-01	TCGA-AU-3779	0	441	0	441	NA	NA	0	441	NA	-0.00782533	CMS2	MSS	NO	LOW
TCGA-CA-6716-01	TCGA-CA-6716	0	371	0	371	0	371	0	371	NA	-0.010766	CMS2	MSS	YES	LOW
TCGA-A6-2674-01	TCGA-A6-2674	0	1331	0	1331	NA	NA	1	735	NA	-0.0108656	CMS4	MSS	YES	LOW
TCGA-D5-6530-01	TCGA-D5-6530	0	621	0	621	NA	NA	0	621	NA	-0.011558	CMS3	MSI-H	NO	LOW
TCGA-F4-6570-01	TCGA-F4-6570	1	188	0	188	NA	NA	0	188	NA	-0.0122532	CMS1	MSI-H	NO	LOW
TCGA-AA-A02K-01	TCGA-AA-A02K	1	426	1	426	NA	NA	1	306	NA	-0.01236	CMS2	MSS	YES	LOW
TCGA-DM-A280-01	TCGA-DM-A280	1	236	NA	236	NA	NA	0	236	NA	-0.0128781	CMS3	MSS	NO	LOW
TCGA-DM-A1HB-01	TCGA-DM-A1HB	0	4126	0	4126	NA	NA	0	4126	NA	-0.0129663	CMS1	MSI-H	NO	LOW
TCGA-G4-6307-01	TCGA-G4-6307	0	1674	0	1674	NA	NA	0	1674	NA	-0.0131171	CMS2	MSS	YES	LOW
TCGA-AY-6197-01	TCGA-AY-6197	0	652	0	652	0	652	0	652	NA	-0.0135922	CMS1	MSI-H	NO	LOW
TCGA-A6-A56B-01	TCGA-A6-A56B	1	1711	0	1711	1	1678	1	1678	NA	-0.0140074	CMS4	MSS	YES	LOW
TCGA-QG-A5Z2-01	TCGA-QG-A5Z2	0	952	0	952	0	952	0	952	NA	-0.0146012	CMS3	MSI-H	NO	LOW
TCGA-D5-6540-01	TCGA-D5-6540	0	491	0	491	NA	NA	0	491	NA	-0.0154328	CMS1	MSI-H	NO	LOW
TCGA-D5-5537-01	TCGA-D5-5537	1	1381	1	1381	1	722	1	722	NA	-0.0155143	CMS2	MSS	NO	LOW
TCGA-G4-6310-01	TCGA-G4-6310	0	1935	0	1935	0	1935	0	1935	NA	-0.0162462	CMS4	MSS	YES	LOW
TCGA-DM-A1D8-01	TCGA-DM-A1D8	1	383	NA	383	NA	NA	0	383	NA	-0.0167089	CMS2	MSS	NO	LOW
TCGA-CM-5864-01	TCGA-CM-5864	0	457	0	457	NA	NA	0	457	NA	-0.0177136	CMS2	MSS	NO	LOW
TCGA-G4-6588-01	TCGA-G4-6588	0	796	0	796	NA	NA	0	796	NA	-0.0182614	CMS1	MSI-H	NO	LOW
TCGA-A6-6138-01	TCGA-A6-6138	0	685	0	685	NA	NA	0	685	NA	-0.0191608	NOLBL	MSS	NO	LOW
TCGA-G4-6295-01	TCGA-G4-6295	0	254	0	254	NA	NA	0	254	NA	-0.0199388	CMS2	MSI-L	NO	LOW
TCGA-A6-6140-01	TCGA-A6-6140	0	734	0	734	0	734	0	734	NA	-0.0210142	CMS2	MSS	YES	LOW
TCGA-D5-6533-01	TCGA-D5-6533	0	775	0	775	0	775	0	775	NA	-0.022671	CMS2	MSS	YES	LOW
TCGA-A6-5662-01	TCGA-A6-5662	0	718	0	718	NA	NA	1	495	NA	-0.0251411	CMS2	MSS	NO	LOW
TCGA-A6-A5ZU-01	TCGA-A6-A5ZU	0	293	0	293	0	293	0	293	NA	-0.0253387	CMS4	MSS	YES	LOW
TCGA-F4-6806-01	TCGA-F4-6806	0	1260	0	1260	1	336	1	336	NA	-0.0255323	CMS3	MSS	YES	LOW
TCGA-AZ-6606-01	TCGA-AZ-6606	1	357	1	357	NA	NA	1	357	NA	-0.0292727	CMS3	MSS	YES	LOW
TCGA-AA-3496-01	TCGA-AA-3496	0	31	0	31	NA	NA	0	31	NA	-0.0294867	NOLBL	MSI-L	NO	LOW
TCGA-G4-6320-01	TCGA-G4-6320	0	804	0	804	NA	NA	0	804	NA	-0.0303917	CMS3	MSI-H	YES	LOW
TCGA-CM-6164-01	TCGA-CM-6164	0	883	0	883	NA	NA	0	883	NA	-0.030437	CMS2	MSS	NO	LOW
TCGA-CA-6718-01	TCGA-CA-6718	1	306	1	306	1	207	1	207	NA	-0.0305644	CMS1	MSS	NO	LOW
TCGA-AD-6963-01	TCGA-AD-6963	0	834	0	834	0	834	0	834	NA	-0.0309667	CMS2	MSS	NO	LOW
TCGA-A6-5661-01	TCGA-A6-5661	0	1020	0	1020	0	1020	0	1020	NA	-0.0320876	CMS1	MSI-H	NO	LOW
TCGA-CM-6171-01	TCGA-CM-6171	0	427	0	427	NA	NA	0	427	NA	-0.0326622	CMS1	MSI-H	NO	LOW
TCGA-AD-A5EK-01	TCGA-AD-A5EK	0	500	0	500	0	500	0	500	NA	-0.0327563	CMS2	MSS	NO	LOW
TCGA-DM-A282-01	TCGA-DM-A282	0	4233	0	4233	NA	NA	0	4233	NA	-0.0343422	CMS2	MSS	NO	LOW
TCGA-AZ-4614-01	TCGA-AZ-4614	1	172	1	172	NA	NA	1	172	NA	-0.0349882	NOLBL	MSI-L	NO	LOW
TCGA-CM-5862-01	TCGA-CM-5862	1	153	1	153	NA	NA	1	31	NA	-0.0358282	CMS2	MSS	NO	LOW
TCGA-D5-6532-01	TCGA-D5-6532	0	555	0	555	NA	NA	0	555	NA	-0.0358631	CMS2	MSI-L	NO	LOW
TCGA-CA-5255-01	TCGA-CA-5255	0	376	0	376	0	376	0	376	NA	-0.0359399	CMS3	MSS	YES	LOW
TCGA-G4-6306-01	TCGA-G4-6306	0	1359	0	1359	NA	NA	0	1359	NA	-0.0371627	CMS2	MSS	NO	LOW
TCGA-AD-6889-01	TCGA-AD-6889	1	2532	0	2532	1	1516	1	1516	NA	-0.037662	CMS1	MSI-H	NO	LOW
TCGA-DM-A1DA-01	TCGA-DM-A1DA	1	228	NA	228	NA	NA	0	228	NA	-0.0389132	CMS3	MSI-L	NO	LOW
TCGA-A6-6652-01	TCGA-A6-6652	0	751	0	751	NA	NA	0	751	NA	-0.0390866	CMS2	MSS	YES	LOW
TCGA-DM-A1D7-01	TCGA-DM-A1D7	1	405	NA	405	NA	NA	1	80	NA	-0.0394853	CMS2	MSS	NO	LOW
TCGA-A6-3810-01	TCGA-A6-3810	0	1111	0	1111	0	1111	0	1111	NA	-0.0398422	CMS4	MSS	NO	LOW
TCGA-CA-6715-01	TCGA-CA-6715	0	383	0	383	0	383	0	383	NA	-0.0399852	CMS2	MSS	YES	LOW
TCGA-A6-2672-01	TCGA-A6-2672	0	1419	0	1419	0	1419	0	1419	NA	-0.0402338	CMS1	MSI-H	NO	LOW
TCGA-A6-3809-01	TCGA-A6-3809	0	996	0	996	NA	NA	0	996	NA	-0.0404219	CMS1	MSS	NO	LOW
TCGA-QG-A5YV-01	TCGA-QG-A5YV	0	1301	0	1301	0	1301	0	1301	NA	-0.0408083	CMS2	MSS	YES	LOW
TCGA-QG-A5YX-01	TCGA-QG-A5YX	0	1003	0	1003	0	1003	0	1003	NA	-0.041552	CMS3	MSI-L	YES	LOW
TCGA-D5-6531-01	TCGA-D5-6531	0	540	0	540	NA	NA	0	540	NA	-0.0417249	NOLBL	MSS	NO	LOW
TCGA-CM-6170-01	TCGA-CM-6170	0	457	0	457	NA	NA	0	457	NA	-0.0420623	CMS2	MSS	NO	LOW
TCGA-DM-A0XF-01	TCGA-DM-A0XF	1	1162	NA	1162	NA	NA	0	1162	NA	-0.0427517	CMS2	MSI-L	NO	LOW
TCGA-NH-A50T-01	TCGA-NH-A50T	0	553	0	553	0	553	0	553	NA	-0.0450547	CMS2	MSS	NO	LOW
TCGA-A6-5659-01	TCGA-A6-5659	0	926	0	926	0	926	0	926	NA	-0.0494714	CMS2	MSS	NO	LOW
TCGA-AZ-6599-01	TCGA-AZ-6599	1	206	0	206	0	206	0	206	NA	-0.0501387	CMS3	MSS	NO	LOW
TCGA-AY-5543-01	TCGA-AY-5543	0	1004	0	1004	NA	NA	0	1004	NA	-0.050592	NOLBL	MSS	YES	LOW
TCGA-A6-6650-01	TCGA-A6-6650	0	627	0	627	NA	NA	0	627	NA	-0.053944	CMS2	MSS	NO	LOW
TCGA-G4-6315-01	TCGA-G4-6315	0	1883	0	1883	NA	NA	0	1883	NA	-0.0551443	CMS2	MSS	YES	LOW
TCGA-DM-A1D9-01	TCGA-DM-A1D9	0	4270	0	4270	NA	NA	0	4270	NA	-0.056745	CMS3	MSS	NO	LOW
TCGA-AZ-4616-01	TCGA-AZ-4616	1	156	1	156	NA	NA	1	156	NA	-0.0583332	CMS1	MSI-L	YES	LOW
TCGA-DM-A0X9-01	TCGA-DM-A0X9	0	3641	0	3641	NA	NA	0	3641	NA	-0.0591189	CMS2	MSS	NO	LOW
TCGA-AA-A01Z-01	TCGA-AA-A01Z	0	1126	0	1126	NA	NA	1	1126	NA	-0.0623984	NOLBL	MSS	NO	LOW
TCGA-G4-6298-01	TCGA-G4-6298	1	715	1	715	NA	NA	1	291	NA	-0.0652646	CMS2	MSI-L	NO	LOW
TCGA-A6-5665-01	TCGA-A6-5665	0	671	0	671	NA	NA	1	529	NA	-0.0660739	CMS1	MSI-H	NO	LOW
TCGA-D5-5540-01	TCGA-D5-5540	0	1706	0	1706	0	1706	0	1706	NA	-0.0685535	CMS2	MSI-L	NO	LOW
TCGA-G4-6626-01	TCGA-G4-6626	1	1422	0	1422	NA	NA	0	1422	NA	-0.0687985	CMS2	MSS	NO	LOW
TCGA-D5-6537-01	TCGA-D5-6537	1	146	1	146	NA	NA	1	123	NA	-0.0712064	CMS2	MSS	NO	LOW
TCGA-DM-A288-01	TCGA-DM-A288	1	427	NA	427	NA	NA	1	320	NA	-0.0714818	CMS3	MSS	NO	LOW
TCGA-AD-6888-01	TCGA-AD-6888	1	472	1	472	1	343	1	343	NA	-0.0781558	CMS2	MSS	NO	LOW
TCGA-AY-A54L-01	TCGA-AY-A54L	0	525	0	525	1	396	1	396	NA	-0.0801427	CMS3	MSI-L	NO	LOW
TCGA-DM-A28M-01	TCGA-DM-A28M	0	2895	0	2895	NA	NA	0	2895	NA	-0.0831643	CMS3	MSS	NO	LOW
TCGA-G4-6294-01	TCGA-G4-6294	1	858	1	858	NA	NA	1	517	NA	-0.0900349	CMS2	MSS	YES	LOW
TCGA-G4-6304-01	TCGA-G4-6304	0	1631	0	1631	NA	NA	1	859	NA	-0.091687	CMS3	MSI-H	YES	LOW
TCGA-DM-A1DB-01	TCGA-DM-A1DB	1	1348	NA	1348	NA	NA	0	1348	NA	-0.092251	CMS2	MSS	NO	LOW
TCGA-DM-A1D0-01	TCGA-DM-A1D0	0	3974	0	3974	NA	NA	0	3974	NA	-0.0945823	CMS2	MSS	NO	LOW
TCGA-A6-5666-01	TCGA-A6-5666	0	995	0	995	1	509	1	509	NA	-0.095193	CMS2	MSI-L	NO	LOW
TCGA-G4-6586-01	TCGA-G4-6586	0	1089	0	1089	NA	NA	0	1089	NA	-0.0979623	CMS1	MSI-H	NO	LOW
TCGA-DM-A1D4-01	TCGA-DM-A1D4	1	2821	NA	2821	NA	NA	1	1920	NA	-0.0993293	CMS3	MSI-L	NO	LOW
TCGA-AZ-6608-01	TCGA-AZ-6608	1	59	NA	59	NA	NA	0	59	NA	-0.108706	CMS2	MSI-L	NO	LOW
TCGA-DM-A1HA-01	TCGA-DM-A1HA	0	4000	0	4000	NA	NA	0	4000	NA	-0.125581	CMS1	MSS	NO	LOW
