# Supplementary material
Source: Research Square preprint supplement (doi:10.21203/rs.3.rs-9763213/v1)
Supplement: Supplementary file 3 [file 3e257dd106dda271db8d4749.xlsx]

## Sheet: H3K9me2_SW1116
Chromosome	Start	End	KO	WT	FC_KO	FC_WT	P_KO	P_WT	FDR_KO	FDR_WT
chr1	948000	953499	9	22	0.536361	1.86442	1	2.65297e-06	1	6.25263e-06
chr1	1975500	1978999	0	23	0.0514012	19.4548	1	4.79854e-27	1	4.81541e-24
chr1	2044000	2054999	16	34	0.599192	1.66892	1	3.13551e-07	1	8.99086e-07
chr1	2079000	2094999	41	20	2.46726	0.405308	6.71513e-08	1	3.04628e-06	1
chr1	2150500	2166499	41	32	1.57007	0.636913	0.00227139	1	0.0138271	1
chr1	2215500	2218999	4	16	0.362832	2.75609	1	6.46891e-08	1	2.15756e-07
chr1	2286500	2287499	3	12	0.379578	2.6345	1	1.77178e-06	1	4.33116e-06
chr1	2335500	2339999	9	18	0.649279	1.54017	1	0.000216586	1	0.000373003
chr1	2473500	2483499	24	35	0.856687	1.16729	1	0.000498161	1	0.000818145
chr1	2534500	2538999	4	22	0.26818	3.72883	1	9.81912e-13	1	1.20344e-11
chr1	2542500	2547499	10	20	0.646187	1.54754	1	0.000112251	1	0.000200556
chr1	2947000	2950999	3	20	0.234977	4.25573	1	2.45907e-13	1	3.58742e-12
chr1	3157500	3162999	14	21	0.841111	1.1889	1	0.00324056	1	0.00488481
chr1	3182000	3188999	16	25	0.806604	1.23977	1	0.000935466	1	0.00149318
chr1	3372500	3380999	10	31	0.42406	2.35816	1	1.83053e-10	1	1.20805e-09
chr1	3518000	3522499	4	22	0.26818	3.72883	1	9.81912e-13	1	1.20344e-11
chr1	3543000	3552499	12	35	0.445477	2.24478	1	8.01429e-11	1	5.73964e-10
chr1	3652000	3684999	71	52	1.67587	0.596703	1.81088e-05	1	0.000268198	1
chr1	3734000	3744499	24	40	0.752213	1.32941	1	1.38032e-05	1	2.87399e-05
chr1	3958000	3969999	39	15	3.08407	0.324246	2.26436e-10	1	3.03589e-08	1
chr1	4071500	4075999	11	17	0.82242	1.21592	1	0.0048555	1	0.00719987
chr1	4085000	4091499	9	25	0.474473	2.1076	1	6.31336e-08	1	2.12775e-07
chr1	4161500	4169999	12	29	0.534573	1.87065	1	1.4209e-07	1	4.44037e-07
chr1	5014000	5027499	34	19	2.15885	0.463209	1.25414e-05	1	0.000198433	1
chr1	5272500	5274499	4	17	0.342675	2.91822	1	1.15242e-08	1	4.64503e-08
chr1	5390000	5398499	12	28	0.553006	1.8083	1	4.44645e-07	1	1.23479e-06
chr1	5427000	5440999	39	18	2.59712	0.385043	3.18497e-08	1	1.65319e-06	1
chr1	5442500	5447499	4	19	0.308407	3.24246	1	3.12892e-10	1	1.92741e-09
chr1	5555500	5562999	13	30	0.557123	1.79494	1	2.42334e-07	1	7.14233e-07
chr1	5933500	5936999	3	20	0.234977	4.25573	1	2.45907e-13	1	3.58742e-12
chr1	6041000	6045499	4	16	0.362832	2.75609	1	6.46891e-08	1	2.15756e-07
chr1	6111000	6111999	0	12	0.0948946	10.538	1	4.94387e-12	1	4.95074e-11
chr1	6242500	6258999	40	33	1.48761	0.672218	0.00622714	0.414092	0.0319569	0.50362
chr1	6348500	6355999	12	26	0.59397	1.68359	1	3.94302e-06	1	9.01838e-06
chr1	6539000	6549999	20	31	0.80957	1.23522	1	0.000344513	1	0.000578339
chr1	6560000	6566499	9	27	0.440582	2.26972	1	4.33863e-09	1	1.94686e-08
chr1	6662500	6676999	32	36	1.10026	0.908872	0.263216	0.023669	0.854238	0.0332833
chr1	6696500	6703499	6	33	0.253983	3.93728	1	6.90378e-18	1	3.836e-16
chr1	6894500	6905999	17	36	0.600144	1.66627	1	1.66537e-07	1	5.11505e-07
chr1	7017500	7029499	21	31	0.84812	1.17908	1	0.000763316	1	0.00122667
chr1	7432500	7437999	7	23	0.41121	2.43185	1	8.85773e-09	1	3.73815e-08
chr1	7632500	7639999	8	27	0.396524	2.52192	1	3.48023e-10	1	2.09434e-09
chr1	7887500	7889999	6	18	0.454495	2.20024	1	9.41891e-07	1	2.4466e-06
chr1	7920000	7946999	53	67	0.979647	1.02078	1	0.000254736	1	0.000435915
chr1	8138500	8149999	13	42	0.401647	2.48975	1	5.48081e-14	1	9.49281e-13
chr1	9038000	9045499	14	29	0.616815	1.62123	1	3.08892e-06	1	7.20778e-06
chr1	9066000	9076499	10	33	0.399116	2.50554	1	1.05305e-11	1	9.84275e-11
chr1	9115000	9122499	18	22	1.01909	0.981272	0.42218	0.025184	1	0.0352909
chr1	9857000	9863999	8	27	0.396524	2.52192	1	3.48023e-10	1	2.09434e-09
chr1	10050500	10058999	15	24	0.789523	1.26659	1	0.000821428	1	0.00131622
chr1	10264000	10271999	21	28	0.935857	1.06854	1	0.0050728	1	0.00750798
chr1	10448000	10453999	6	25	0.332131	3.01086	1	1.69342e-11	1	1.48045e-10
chr1	10538000	10547499	18	26	0.86811	1.15193	1	0.00229993	1	0.00351134
chr1	10804000	10807999	4	18	0.324639	3.08034	1	1.94726e-09	1	9.78237e-09
chr1	10827000	10832999	12	22	0.697269	1.43417	1	0.000202061	1	0.000349698
chr1	10966500	10970999	5	21	0.336444	2.97226	1	4.40219e-10	1	2.53579e-09
chr1	11287000	11306499	39	56	0.865705	1.15513	1	3.07819e-05	1	5.96893e-05
chr1	11306500	11319999	26	41	0.793048	1.26096	1	3.82551e-05	1	7.36801e-05
chr1	11539000	11543499	10	25	0.52192	1.916	1	4.5237e-07	1	1.24933e-06
chr1	11595500	11604499	34	22	1.87726	0.532691	0.00020955	1	0.00194655	1
chr1	11621500	11627999	7	21	0.448593	2.22919	1	1.55672e-07	1	4.82157e-07
chr1	12034000	12038499	3	17	0.27414	3.64777	1	1.39124e-10	1	9.34529e-10
chr1	12077500	12102499	56	43	1.59811	0.625739	0.000354174	1	0.00298976	1
chr1	12227000	12233499	8	22	0.482725	2.07157	1	3.79773e-07	1	1.06771e-06
chr1	12333000	12341499	10	27	0.48464	2.06339	1	3.82426e-08	1	1.38182e-07
chr1	12567500	12577999	16	35	0.582547	1.7166	1	1.1136e-07	1	3.55416e-07
chr1	12633500	12638499	5	17	0.41121	2.43185	1	2.99402e-07	1	8.66999e-07
chr1	12772000	12783499	9	37	0.324639	3.08034	1	9.96874e-16	1	2.88319e-14
chr1	13444500	13455499	14	29	0.616815	1.62123	1	3.08892e-06	1	7.20778e-06
chr1	13483500	13489999	11	19	0.740178	1.35103	1	0.000947043	1	0.001507
chr1	13788500	13800499	17	46	0.472454	2.11661	1	1.96583e-12	1	2.32585e-11
chr1	13849000	13859999	33	10	3.81304	0.262258	1.05305e-11	1	2.95533e-09	1
chr1	14123000	14124999	1	14	0.164484	6.07962	1	1.53529e-14	1	3.30576e-13
chr1	14583500	14600499	40	27	1.80639	0.553591	0.000168669	1	0.00162185	1
chr1	14754000	14761999	10	26	0.50259	1.98969	1	1.33866e-07	1	4.21439e-07
chr1	14875500	14881499	6	24	0.345416	2.89506	1	9.1277e-11	1	6.3892e-10
chr1	14969000	14972499	4	17	0.342675	2.91822	1	1.15242e-08	1	4.64503e-08
chr1	15065000	15076499	35	26	1.64484	0.607962	0.0019158	1	0.0120387	1
chr1	15112500	15129999	51	38	1.64484	0.607962	0.000307237	1	0.00265029	1
chr1	15210000	15218999	10	31	0.42406	2.35816	1	1.83053e-10	1	1.20805e-09
chr1	15295500	15305999	23	28	1.02093	0.979494	0.419773	0.0157006	1	0.0223506
chr1	15356000	15360999	14	18	0.973918	1.02678	1	0.0233301	1	0.0328486
chr1	15679000	15681499	3	15	0.308407	3.24246	1	7.32187e-09	1	3.14897e-08
chr1	15835500	15838999	15	21	0.897185	1.1146	1	0.00700034	1	0.0102355
chr1	16415000	16428999	39	23	2.05605	0.48637	1.1747e-05	1	0.000188385	1
chr1	16615000	16631499	60	97	0.767872	1.3023	1	3.27548e-10	1	1.98665e-09
chr1	16643000	16644499	8	16	0.653098	1.53116	1	0.00041937	1	0.000695785
chr1	16910000	16948499	97	99	1.20896	0.827159	0.0300506	0.0113744	0.125746	0.0163801
chr1	17021500	17027499	6	30	0.278562	3.58987	1	2.18699e-15	1	5.64053e-14
chr1	17340000	17345499	2	19	0.185044	5.40411	1	1.38498e-15	1	3.84774e-14
chr1	17440000	17451499	31	21	1.79437	0.557298	0.000763316	1	0.00561358	1
chr1	17484000	17494499	14	31	0.578264	1.72931	1	3.88268e-07	1	1.08423e-06
chr1	17537000	17538499	3	14	0.328968	3.03981	1	4.86655e-08	1	1.71886e-07
chr1	17615500	17619999	5	20	0.352466	2.83716	1	2.41225e-09	1	1.13231e-08
chr1	17861000	17865499	10	20	0.646187	1.54754	1	0.000112251	1	0.000200556
chr1	18017000	18019999	1	16	0.145133	6.89024	1	3.68727e-17	1	1.60036e-15
chr1	18109500	18113499	6	17	0.479745	2.08444	1	3.73944e-06	1	8.62724e-06
chr1	18347500	18358999	32	15	2.54436	0.393026	5.9045e-07	1	1.67266e-05	1
chr1	18500000	18508499	11	26	0.54828	1.82389	1	8.12067e-07	1	2.13703e-06
chr1	18829500	18832499	1	20	0.117489	8.51147	1	1.09902e-22	1	3.08433e-20
chr1	18960500	18967499	8	28	0.382851	2.61198	1	7.71067e-11	1	5.59848e-10
chr1	19230500	19236499	8	23	0.462611	2.16164	1	1.01189e-07	1	3.25495e-07
chr1	19240000	19242999	8	17	0.616815	1.62123	1	0.000147131	1	0.000259515
chr1	19352500	19356999	1	19	0.123363	8.10616	1	2.85231e-21	1	4.43461e-19
chr1	19483500	19495999	32	42	0.946739	1.05626	1	0.00133084	1	0.00208457
chr1	19698500	19708999	13	31	0.539713	1.85284	1	7.86922e-08	1	2.56544e-07
chr1	19730500	19740999	17	32	0.672889	1.48613	1	7.81124e-06	1	1.6907e-05
chr1	19875000	19886499	33	18	2.20755	0.452991	1.0015e-05	1	0.000163944	1
chr1	20006500	20017499	15	30	0.636712	1.57057	1	4.35973e-06	1	9.87935e-06
chr1	20062000	20065499	2	22	0.160908	6.21472	1	5.49715e-19	1	4.32407e-17
chr1	20242000	20247499	10	20	0.646187	1.54754	1	0.000112251	1	0.000200556
chr1	20270500	20277499	15	30	0.636712	1.57057	1	4.35973e-06	1	9.87935e-06
chr1	20367500	20373499	3	21	0.224296	4.45839	1	2.70384e-14	1	4.93336e-13
chr1	20444500	20449999	10	27	0.48464	2.06339	1	3.82426e-08	1	1.38182e-07
chr1	20542000	20545999	10	20	0.646187	1.54754	1	0.000112251	1	0.000200556
chr1	21508500	21516499	10	28	0.467929	2.13708	1	1.05589e-08	1	4.37743e-08
chr1	21550500	21559499	13	26	0.63966	1.56333	1	1.58862e-05	1	3.22734e-05
chr1	21957000	21966499	14	27	0.660873	1.51315	1	2.16693e-05	1	4.32394e-05
chr1	22037500	22042999	6	28	0.297773	3.35827	1	8.70002e-14	1	1.47295e-12
chr1	22089000	22093999	7	20	0.469954	2.12787	1	6.12245e-07	1	1.66203e-06
chr1	22150000	22166499	49	32	1.86914	0.535007	1.77949e-05	1	0.000264021	1
chr1	22661000	22667999	14	28	0.638084	1.56719	1	8.31492e-06	1	1.77444e-05
chr1	22807000	22812499	15	19	0.986904	1.01327	1	0.023971	1	0.0336865
chr1	22916500	22934499	49	35	1.71337	0.583644	0.000151705	1	0.00148855	1
chr1	22957500	22964999	9	26	0.4569	2.18866	1	1.68458e-08	1	6.50877e-08
chr1	23386500	23390499	5	17	0.41121	2.43185	1	2.99402e-07	1	8.66999e-07
chr1	23554500	23563499	13	35	0.479745	2.08444	1	6.54674e-10	1	3.63517e-09
chr1	23886500	23891999	9	19	0.616815	1.62123	1	7.70822e-05	1	0.000141398
chr1	24323500	24328999	8	20	0.528698	1.89144	1	4.71976e-06	1	1.05536e-05
chr1	24407500	24418999	16	32	0.635506	1.57355	1	2.28951e-06	1	5.5379e-06
chr1	24938500	24945499	28	17	1.98751	0.503141	0.000232066	1	0.00212296	1
chr1	24987000	24993999	5	27	0.264349	3.78287	1	6.89638e-15	1	1.59039e-13
chr1	25045500	25052499	28	11	2.98127	0.335427	7.72346e-08	1	3.41938e-06	1
chr1	25063500	25072499	9	25	0.474473	2.1076	1	6.31336e-08	1	2.12775e-07
chr1	25080000	25088999	12	27	0.572757	1.74594	1	1.34664e-06	1	3.42963e-06
chr1	25645000	25653999	16	31	0.655366	1.52587	1	5.9288e-06	1	1.30025e-05
chr1	26026000	26038999	10	44	0.301554	3.31616	1	2.41093e-19	1	2.05245e-17
chr1	26204500	26212499	15	33	0.580532	1.72256	1	2.08034e-07	1	6.34721e-07
chr1	26391000	26401999	17	36	0.600144	1.66627	1	1.66537e-07	1	5.11505e-07
chr1	26698000	26706499	17	22	0.965449	1.03579	1	0.0142114	1	0.0203285
chr1	26710000	26717999	28	13	2.55538	0.391332	2.09416e-06	1	4.7081e-05	1
chr1	26847500	26854499	3	24	0.197381	5.06635	1	2.78039e-17	1	1.30789e-15
chr1	26875500	26883499	9	34	0.352466	2.83716	1	1.32431e-13	1	2.09836e-12
chr1	26985000	26996499	35	13	3.17219	0.31524	6.54674e-10	1	7.17887e-08	1
chr1	27034500	27050499	38	26	1.78191	0.561196	0.0003011	1	0.00262056	1
chr1	27282000	27287999	5	20	0.352466	2.83716	1	2.41225e-09	1	1.13231e-08
chr1	27330500	27335999	8	23	0.462611	2.16164	1	1.01189e-07	1	3.25495e-07
chr1	27532500	27540499	7	25	0.379578	2.6345	1	4.29743e-10	1	2.51838e-09
chr1	27965500	27973499	10	28	0.467929	2.13708	1	1.05589e-08	1	4.37743e-08
chr1	28084000	28096499	34	21	1.96259	0.50953	8.88708e-05	1	0.000950596	1
chr1	28139000	28142999	14	19	0.925222	1.08082	1	0.0126104	1	0.01813
chr1	28175000	28178999	6	18	0.454495	2.20024	1	9.41891e-07	1	2.4466e-06
chr1	28485500	28487999	5	15	0.462611	2.16164	1	5.7517e-06	1	1.27262e-05
chr1	29232500	29251499	45	50	1.11269	0.898726	0.214446	0.0132495	0.71016	0.0189895
chr1	29268000	29285499	41	48	1.0574	0.945719	0.330946	0.00615059	1	0.0090301
chr1	29348000	29358499	18	38	0.600999	1.6639	1	8.84743e-08	1	2.86965e-07
chr1	29656000	29658999	3	16	0.290266	3.44512	1	1.03803e-09	1	5.62147e-09
chr1	29672000	29678999	8	26	0.41121	2.43185	1	1.51776e-09	1	7.80953e-09
chr1	30121000	30124499	5	17	0.41121	2.43185	1	2.99402e-07	1	8.66999e-07
chr1	30706500	30708499	3	16	0.290266	3.44512	1	1.03803e-09	1	5.62147e-09
chr1	30902500	30911999	12	34	0.458205	2.18243	1	2.99468e-10	1	1.88182e-09
chr1	31237000	31246499	11	30	0.477534	2.09409	1	6.4403e-09	1	2.81183e-08
chr1	31464000	31471999	11	29	0.493452	2.02654	1	2.2661e-08	1	8.5971e-08
chr1	31513500	31525499	11	33	0.435399	2.29675	1	1.2324e-10	1	8.45147e-10
chr1	31587000	31591999	8	19	0.555133	1.80137	1	1.55743e-05	1	3.18251e-05
chr1	31679500	31686499	12	30	0.517329	1.93301	1	4.39877e-08	1	1.56701e-07
chr1	31767000	31772499	8	21	0.504667	1.98151	1	1.36782e-06	1	3.42794e-06
chr1	31854500	31862499	15	25	0.759157	1.31725	1	0.000373381	1	0.000624551
chr1	32072000	32074499	2	20	0.176233	5.67431	1	1.06522e-16	1	4.18953e-15
chr1	32481500	32487999	14	20	0.881164	1.13486	1	0.0065277	1	0.00955792
chr1	32949000	32962999	38	27	1.71827	0.581981	0.000606884	1	0.00464576	1
chr1	33256500	33283999	63	44	1.7545	0.569964	1.22618e-05	1	0.000195316	1
chr1	33753000	33757999	7	19	0.493452	2.02654	1	2.30198e-06	1	5.53129e-06
chr1	33798000	33801499	5	18	0.389567	2.56695	1	6.30488e-08	1	2.15095e-07
chr1	33914000	33926999	17	34	0.634438	1.5762	1	1.20403e-06	1	3.08111e-06
chr1	34347000	34350999	3	18	0.259712	3.85043	1	1.76798e-11	1	1.51132e-10
chr1	34763500	34767499	5	18	0.389567	2.56695	1	6.30488e-08	1	2.15095e-07
chr1	35170000	35174499	5	19	0.370089	2.70205	1	1.26298e-08	1	5.00179e-08
chr1	35591000	35599999	14	27	0.660873	1.51315	1	2.16693e-05	1	4.32394e-05
chr1	35717000	35736999	45	29	1.89157	0.528663	2.62424e-05	1	0.000356897	1
chr1	35768500	35783499	42	30	1.71116	0.584398	0.000388637	1	0.00322398	1
chr1	35859000	35867499	28	17	1.98751	0.503141	0.000232066	1	0.00212296	1
chr1	36321000	36332499	33	17	2.33019	0.42915	3.10963e-06	1	6.38428e-05	1
chr1	36502000	36508999	14	21	0.841111	1.1889	1	0.00324056	1	0.00488481
chr1	36751500	36759999	23	34	0.845918	1.18215	1	0.000460247	1	0.000759418
chr1	36779000	36786999	14	25	0.711709	1.40507	1	0.000133008	1	0.00023581
chr1	36849000	36867999	43	35	1.50777	0.663231	0.00390059	0.445554	0.0217388	0.537953
chr1	37060500	37074999	17	50	0.435399	2.29675	1	1.14743e-14	1	2.56745e-13
chr1	37099500	37118499	50	21	2.85978	0.349677	2.34158e-11	1	4.90784e-09	1
chr1	37122000	37139999	47	52	1.11725	0.895055	0.202597	0.0128418	0.675242	0.018445
chr1	37331000	37337499	7	19	0.493452	2.02654	1	2.30198e-06	1	5.53129e-06
chr1	37374500	37380999	6	19	0.43177	2.31605	1	2.25762e-07	1	6.81091e-07
chr1	37400500	37414499	48	26	2.23881	0.446666	1.45161e-07	1	5.46889e-06	1
chr1	37757500	37764999	10	27	0.48464	2.06339	1	3.82426e-08	1	1.38182e-07
chr1	38216500	38223499	13	27	0.616815	1.62123	1	5.86553e-06	1	1.29117e-05
chr1	38939500	38945499	7	22	0.429089	2.33052	1	3.79105e-08	1	1.38708e-07
chr1	39263500	39277999	33	23	1.74764	0.5722	0.000888044	1	0.00639037	1
chr1	39292000	39295499	0	15	0.0771019	12.9699	1	7.75418e-16	1	2.4294e-14
chr1	39535000	39540999	17	23	0.925222	1.08082	1	0.00781703	1	0.0114014
chr1	39824000	39837999	23	47	0.616815	1.62123	1	9.99931e-09	1	4.17102e-08
chr1	39906000	39914999	7	23	0.41121	2.43185	1	8.85773e-09	1	3.73815e-08
chr1	40007500	40013499	5	19	0.370089	2.70205	1	1.26298e-08	1	5.00179e-08
chr1	40379000	40387499	13	28	0.595545	1.67913	1	2.09416e-06	1	5.09741e-06
chr1	40413000	40433999	46	31	1.81189	0.551909	6.23379e-05	1	0.000720553	1
chr1	40824500	40838999	36	25	1.75555	0.569622	0.000535356	1	0.00420913	1
chr1	40840000	40845499	10	17	0.753885	1.32646	1	0.00183361	1	0.00282454
chr1	40854500	40857499	2	16	0.217699	4.59349	1	2.25413e-12	1	2.47506e-11
chr1	40920000	40932499	24	36	0.833534	1.19971	1	0.000255326	1	0.000435463
chr1	41381000	41385499	4	24	0.246726	4.05308	1	1.7005e-14	1	3.54175e-13
chr1	41448500	41452499	7	18	0.519423	1.92521	1	8.25769e-06	1	1.77319e-05
chr1	41554500	41561999	8	23	0.462611	2.16164	1	1.01189e-07	1	3.25495e-07
chr1	41608000	41615499	9	27	0.440582	2.26972	1	4.33863e-09	1	1.94686e-08
chr1	41637000	41643499	11	20	0.704931	1.41858	1	0.000390465	1	0.000650173
chr1	41664500	41670499	13	21	0.785037	1.27383	1	0.00134445	1	0.00210271
chr1	41928500	41950499	46	32	1.75699	0.569156	0.000127402	1	0.00128708	1
chr1	42467000	42474499	9	31	0.385509	2.59397	1	1.37017e-11	1	1.22833e-10
chr1	42515500	42521499	5	24	0.296071	3.37757	1	2.07405e-12	1	2.42187e-11
chr1	42628000	42632499	11	17	0.82242	1.21592	1	0.0048555	1	0.00719987
chr1	42669000	42682499	44	27	1.98262	0.504383	9.96872e-06	1	0.00016465	1
chr1	42944500	42948499	0	19	0.0616815	16.2123	1	2.85231e-21	1	4.43461e-19
chr1	43207500	43217999	15	26	0.73104	1.36791	1	0.000163845	1	0.000286705
chr1	43336000	43360999	60	53	1.39354	0.717594	0.00549622	0.238941	0.0296293	0.303136
chr1	43695500	43702499	8	28	0.382851	2.61198	1	7.71067e-11	1	5.59848e-10
chr1	43892000	43903999	33	24	1.67774	0.596041	0.00175592	1	0.0111632	1
chr1	43971500	43986499	38	22	2.09181	0.478056	9.85938e-06	1	0.000163743	1
chr1	44027000	44033499	14	24	0.740178	1.35103	1	0.000312601	1	0.000526315
chr1	44103500	44110499	11	27	0.528698	1.89144	1	2.54724e-07	1	7.45971e-07
chr1	44132000	44137499	6	24	0.345416	2.89506	1	9.1277e-11	1	6.3892e-10
chr1	44405000	44416499	37	25	1.803	0.554632	0.000278285	1	0.00245163	1
chr1	44456000	44467999	37	20	2.23228	0.447972	2.77343e-06	1	5.84255e-05	1
chr1	44510500	44521499	33	25	1.61321	0.619883	0.00327847	1	0.019024	1
chr1	44546000	44555499	17	32	0.672889	1.48613	1	7.81124e-06	1	1.6907e-05
chr1	44680500	44692999	22	36	0.766851	1.30403	1	4.7805e-05	1	9.06137e-05
chr1	44722000	44728499	6	19	0.43177	2.31605	1	2.25762e-07	1	6.81091e-07
chr1	44773000	44787499	18	53	0.434055	2.30386	1	1.96558e-15	1	5.28776e-14
chr1	44857500	44863999	7	26	0.36552	2.73583	1	8.94897e-11	1	6.34863e-10
chr1	45021500	45041999	46	26	2.14743	0.465673	7.91234e-07	1	2.09452e-05	1
chr1	45328000	45332999	8	18	0.584351	1.7113	1	4.90504e-05	1	9.26349e-05
chr1	45493000	45501999	30	11	3.18688	0.313787	6.4403e-09	1	4.47122e-07	1
chr1	46160500	46168999	14	28	0.638084	1.56719	1	8.31492e-06	1	1.77444e-05
chr1	46173500	46177999	4	17	0.342675	2.91822	1	1.15242e-08	1	4.64503e-08
chr1	46333500	46349999	16	52	0.395693	2.52721	1	6.92507e-17	1	2.83825e-15
chr1	46371500	46381999	18	29	0.781299	1.27992	1	0.000268603	1	0.000457235
chr1	46554500	46560999	1	27	0.0881164	11.3486	1	4.19699e-33	1	3.47469e-29
chr1	46635000	46653999	47	31	1.85044	0.540411	3.19838e-05	1	0.00041931	1
chr1	46842500	46848499	9	22	0.536361	1.86442	1	2.65297e-06	1	6.25263e-06
chr1	47181000	47181999	6	13	0.616815	1.62123	1	0.00053648	1	0.000878552
chr1	47678000	47681999	3	21	0.224296	4.45839	1	2.70384e-14	1	4.93336e-13
chr1	47984000	47997499	33	13	2.99596	0.333783	7.59424e-09	1	4.98002e-07	1
chr1	48509500	48527499	38	45	1.0459	0.956111	0.359709	0.0062293	1	0.00913836
chr1	49638500	49639999	0	15	0.0771019	12.9699	1	7.75418e-16	1	2.4294e-14
chr1	50277000	50282499	5	17	0.41121	2.43185	1	2.99402e-07	1	8.66999e-07
chr1	50283000	50308999	60	39	1.88129	0.531551	2.29246e-06	1	4.92009e-05	1
chr1	50418500	50435999	43	37	1.42841	0.700077	0.00969861	0.319093	0.0476456	0.396587
chr1	50454500	50459999	6	19	0.43177	2.31605	1	2.25762e-07	1	6.81091e-07
chr1	50651500	50658999	10	21	0.616815	1.62123	1	4.04198e-05	1	7.75248e-05
chr1	51020500	51023499	2	18	0.194784	5.1339	1	1.71564e-14	1	3.44335e-13
chr1	51517000	51528499	15	46	0.419959	2.38118	1	2.64923e-14	1	4.97911e-13
chr1	51613000	51634999	52	46	1.39111	0.718848	0.00886765	0.247	0.0443865	0.312534
chr1	51732500	51736499	4	18	0.324639	3.08034	1	1.94726e-09	1	9.78237e-09
chr1	51808000	51815999	9	23	0.514012	1.94548	1	7.93376e-07	1	2.1049e-06
chr1	52387000	52402999	37	28	1.61648	0.618628	0.00205468	1	0.0127756	1
chr1	52447000	52458999	9	43	0.28037	3.56671	1	2.87076e-20	1	3.43206e-18
chr1	52592500	52607499	37	23	1.95325	0.511968	5.48736e-05	1	0.00065226	1
chr1	52774000	52777999	4	16	0.362832	2.75609	1	6.46891e-08	1	2.15756e-07
chr1	52909500	52913999	5	23	0.308407	3.24246	1	1.28861e-11	1	1.17981e-10
chr1	52915500	52934499	42	29	1.7682	0.565546	0.000196133	1	0.00184364	1
chr1	53144500	53149999	10	21	0.616815	1.62123	1	4.04198e-05	1	7.75248e-05
chr1	53179000	53185499	8	25	0.427026	2.34178	1	6.38796e-09	1	2.8187e-08
chr1	53218500	53222999	2	20	0.176233	5.67431	1	1.06522e-16	1	4.18953e-15
chr1	53314000	53315499	3	14	0.328968	3.03981	1	4.86655e-08	1	1.71886e-07
chr1	53322000	53332499	22	44	0.630522	1.58599	1	4.92541e-08	1	1.73116e-07
chr1	53672500	53686999	42	21	2.41119	0.414734	9.31632e-08	1	3.94526e-06	1
chr1	53907000	53913499	10	27	0.48464	2.06339	1	3.82426e-08	1	1.38182e-07
chr1	54102000	54116499	35	23	1.85044	0.540411	0.000232363	1	0.00211515	1
chr1	54243000	54248499	10	23	0.565414	1.76862	1	4.62459e-06	1	1.04246e-05
chr1	54356000	54365499	11	34	0.422959	2.3643	1	3.11111e-11	1	2.49764e-10
chr1	54648500	54653499	10	23	0.565414	1.76862	1	4.62459e-06	1	1.04246e-05
chr1	54689000	54694999	7	24	0.394762	2.53317	1	1.9888e-09	1	9.80806e-09
chr1	55308000	55323999	41	29	1.72708	0.579011	0.000367505	1	0.00308969	1
chr1	55406000	55409999	4	26	0.22845	4.37733	1	2.52151e-16	1	8.94988e-15
chr1	56606000	56613499	12	28	0.553006	1.8083	1	4.44645e-07	1	1.23479e-06
chr1	56912500	56913999	2	14	0.246726	4.05308	1	2.36139e-10	1	1.5208e-09
chr1	56950500	56954999	5	15	0.462611	2.16164	1	5.7517e-06	1	1.27262e-05
chr1	57062500	57072499	10	31	0.42406	2.35816	1	1.83053e-10	1	1.20805e-09
chr1	57112500	57120499	6	25	0.332131	3.01086	1	1.69342e-11	1	1.48045e-10
chr1	57177500	57186499	28	10	3.2523	0.307475	1.05589e-08	1	6.6477e-07	1
chr1	57500500	57514499	22	35	0.788152	1.26879	1	0.000101386	1	0.000182811
chr1	57950000	57985999	68	75	1.12001	0.892852	0.16129	0.00441414	0.550591	0.00656127
chr1	58059500	58067499	14	26	0.68535	1.45911	1	5.46181e-05	1	0.000102356
chr1	58629000	58631499	4	16	0.362832	2.75609	1	6.46891e-08	1	2.15756e-07
chr1	58803500	58815999	36	28	1.57394	0.635348	0.00355086	1	0.0203902	1
chr1	58830000	58835999	8	25	0.427026	2.34178	1	6.38796e-09	1	2.8187e-08
chr1	59116000	59132499	50	33	1.85044	0.540411	1.95505e-05	1	0.000284212	1
chr1	59139000	59148499	8	36	0.300072	3.33253	1	1.46619e-16	1	5.53641e-15
chr1	59172500	59194999	47	66	0.883794	1.13148	1	1.44798e-05	1	2.97427e-05
chr1	60242000	60265499	49	36	1.66707	0.599856	0.000285166	1	0.0025016	1
chr1	60546500	60550499	2	17	0.205605	4.8637	1	2.0199e-13	1	3.0925e-12
chr1	60746000	60761499	40	29	1.68596	0.593134	0.000673684	1	0.00503038	1
chr1	60888000	60892499	7	20	0.469954	2.12787	1	6.12245e-07	1	1.66203e-06
chr1	61050000	61061999	35	20	2.11479	0.472859	1.53853e-05	1	0.000234577	1
chr1	61250000	61261499	18	35	0.651082	1.5359	1	1.63351e-06	1	4.0142e-06
chr1	61443000	61450999	12	26	0.59397	1.68359	1	3.94302e-06	1	9.01838e-06
chr1	61929000	61933999	8	20	0.528698	1.89144	1	4.71976e-06	1	1.05536e-05
chr1	62151500	62157499	10	26	0.50259	1.98969	1	1.33866e-07	1	4.21439e-07
chr1	62198500	62204999	13	23	0.719617	1.38963	1	0.000255186	1	0.00043601
chr1	62208500	62216499	15	30	0.636712	1.57057	1	4.35973e-06	1	9.87935e-06
chr1	62272000	62300499	64	53	1.48492	0.673435	0.00103416	0.402489	0.00712147	0.490987
chr1	62376500	62394499	25	45	0.697269	1.43417	1	6.44547e-07	1	1.73267e-06
chr1	62433500	62440999	15	27	0.704931	1.41858	1	6.94826e-05	1	0.00012836
chr1	63219000	63222999	5	18	0.389567	2.56695	1	6.30488e-08	1	2.15095e-07
chr1	63663500	63668999	6	23	0.359809	2.77925	1	4.73408e-10	1	2.67852e-09
chr1	63769500	63785999	42	30	1.71116	0.584398	0.000388637	1	0.00322398	1
chr1	63843500	63847499	5	21	0.336444	2.97226	1	4.40219e-10	1	2.53579e-09
chr1	63933500	63935999	3	16	0.290266	3.44512	1	1.03803e-09	1	5.62147e-09
chr1	64047000	64055999	2	25	0.142342	7.02534	1	1.48968e-22	1	3.42586e-20
chr1	64206000	64216499	10	28	0.467929	2.13708	1	1.05589e-08	1	4.37743e-08
chr1	64967500	64986499	41	30	1.67137	0.598312	0.000705062	1	0.00521995	1
chr1	65242000	65248999	10	21	0.616815	1.62123	1	4.04198e-05	1	7.75248e-05
chr1	65324000	65340999	41	35	1.43923	0.694814	0.00981433	0.33827	0.0476696	0.418459
chr1	65353500	65357499	6	17	0.479745	2.08444	1	3.73944e-06	1	8.62724e-06
chr1	65582000	65585999	5	18	0.389567	2.56695	1	6.30488e-08	1	2.15095e-07
chr1	66268500	66274999	8	25	0.427026	2.34178	1	6.38796e-09	1	2.8187e-08
chr1	66712500	66726499	38	17	2.67286	0.37413	2.07786e-08	1	1.14875e-06	1
chr1	67191500	67196499	3	19	0.246726	4.05308	1	2.13592e-12	1	2.42071e-11
chr1	67238000	67242499	7	19	0.493452	2.02654	1	2.30198e-06	1	5.53129e-06
chr1	67698000	67707499	12	30	0.517329	1.93301	1	4.39877e-08	1	1.56701e-07
chr1	67767500	67780499	41	18	2.72697	0.366707	3.84351e-09	1	2.93276e-07	1
chr1	67785500	67799499	41	25	1.99279	0.50181	1.60188e-05	1	0.000241237	1
chr1	67909000	67913999	6	22	0.375453	2.66345	1	2.35904e-09	1	1.12877e-08
chr1	68108500	68123499	36	24	1.82577	0.547714	0.000255326	1	0.00229267	1
chr1	70138000	70140999	6	16	0.507965	1.96864	1	1.40929e-05	1	2.90453e-05
chr1	70210500	70216499	9	18	0.649279	1.54017	1	0.000216586	1	0.000373003
chr1	70412000	70433999	49	37	1.6232	0.616068	0.000516244	1	0.0040792	1
chr1	70485500	70489499	4	22	0.26818	3.72883	1	9.81912e-13	1	1.20344e-11
chr1	70556000	70561999	5	23	0.308407	3.24246	1	1.28861e-11	1	1.17981e-10
chr1	70898500	70903999	7	21	0.448593	2.22919	1	1.55672e-07	1	4.82157e-07
chr1	71040500	71058499	43	35	1.50777	0.663231	0.00390059	0.445554	0.0217388	0.537953
chr1	76989000	76991999	4	19	0.308407	3.24246	1	3.12892e-10	1	1.92741e-09
chr1	77026000	77032999	10	24	0.542797	1.84231	1	1.47395e-06	1	3.65464e-06
chr1	78684500	78699499	33	20	1.99731	0.500675	7.68968e-05	1	0.000856259	1
chr1	81665500	81680499	30	20	1.82107	0.549127	0.00069872	1	0.00519273	1
chr1	83077500	83087499	11	30	0.477534	2.09409	1	6.4403e-09	1	2.81183e-08
chr1	83624000	83636999	34	14	2.87847	0.347407	1.38755e-08	1	8.04731e-07	1
chr1	83648000	83655499	6	22	0.375453	2.66345	1	2.35904e-09	1	1.12877e-08
chr1	83937000	83945499	5	25	0.284684	3.51267	1	3.21169e-13	1	4.42422e-12
chr1	83960500	83965499	3	19	0.246726	4.05308	1	2.13592e-12	1	2.42071e-11
chr1	84609500	84637499	66	52	1.55949	0.641234	0.000251333	1	0.00226542	1
chr1	84761500	84766499	8	22	0.482725	2.07157	1	3.79773e-07	1	1.06771e-06
chr1	84772500	84778499	12	24	0.641487	1.55888	1	3.04122e-05	1	5.91073e-05
chr1	84944500	84961999	51	34	1.83282	0.545607	2.1352e-05	1	0.000303082	1
chr1	85020500	85027999	8	25	0.427026	2.34178	1	6.38796e-09	1	2.8187e-08
chr1	85547500	85564499	40	27	1.80639	0.553591	0.000168669	1	0.00162185	1
chr1	85571500	85582499	20	31	0.80957	1.23522	1	0.000344513	1	0.000578339
chr1	85717500	85719999	6	16	0.507965	1.96864	1	1.40929e-05	1	2.90453e-05
chr1	86327000	86347499	45	27	2.02668	0.493418	4.65991e-06	1	8.76307e-05	1
chr1	86386000	86399499	13	34	0.493452	2.02654	1	2.26057e-09	1	1.09558e-08
chr1	86416000	86420499	9	22	0.536361	1.86442	1	2.65297e-06	1	6.25263e-06
chr1	86776500	86780999	10	16	0.798231	1.25277	1	0.00422323	1	0.0062905
chr1	86933000	86949999	40	22	2.19908	0.454736	1.84633e-06	1	4.19364e-05	1
chr1	87121500	87126499	8	20	0.528698	1.89144	1	4.71976e-06	1	1.05536e-05
chr1	87238500	87253499	37	30	1.51219	0.661292	0.00611883	0.451125	0.0318152	0.544104
chr1	87313000	87322499	9	27	0.440582	2.26972	1	4.33863e-09	1	1.94686e-08
chr1	88017500	88025999	21	28	0.935857	1.06854	1	0.0050728	1	0.00750798
chr1	88067500	88076499	10	27	0.48464	2.06339	1	3.82426e-08	1	1.38182e-07
chr1	88081000	88088999	16	26	0.77673	1.28745	1	0.00043663	1	0.000721925
chr1	88214500	88231499	39	25	1.89789	0.5269	6.99503e-05	1	0.000789528	1
chr1	88283000	88303999	56	28	2.42472	0.412419	1.0919e-09	1	1.03906e-07	1
chr1	88566500	88574999	13	26	0.63966	1.56333	1	1.58862e-05	1	3.22734e-05
chr1	88737500	88741499	4	24	0.246726	4.05308	1	1.7005e-14	1	3.54175e-13
chr1	88893500	88900999	9	27	0.440582	2.26972	1	4.33863e-09	1	1.94686e-08
chr1	89512500	89515999	2	16	0.217699	4.59349	1	2.25413e-12	1	2.47506e-11
chr1	89552500	89558499	9	21	0.560741	1.78336	1	8.51554e-06	1	1.80793e-05
chr1	89607000	89611499	7	20	0.469954	2.12787	1	6.12245e-07	1	1.66203e-06
chr1	89832000	89842499	20	34	0.740178	1.35103	1	3.48581e-05	1	6.74157e-05
chr1	90041500	90045999	8	24	0.444107	2.25171	1	2.5914e-08	1	9.67278e-08
chr1	90657000	90664999	15	25	0.759157	1.31725	1	0.000373381	1	0.000624551
chr1	91160500	91180499	47	26	2.19312	0.455971	3.42287e-07	1	1.07544e-05	1
chr1	91217000	91222999	9	21	0.560741	1.78336	1	8.51554e-06	1	1.80793e-05
chr1	91232000	91234999	4	19	0.308407	3.24246	1	3.12892e-10	1	1.92741e-09
chr1	91606500	91611499	14	19	0.925222	1.08082	1	0.0126104	1	0.01813
chr1	91708500	91721499	38	20	2.29103	0.436486	1.13407e-06	1	2.82799e-05	1
chr1	91865000	91870499	5	20	0.352466	2.83716	1	2.41225e-09	1	1.13231e-08
chr1	91873500	91891499	34	26	1.59915	0.625332	0.00337855	1	0.0195362	1
chr1	92132000	92134499	5	18	0.389567	2.56695	1	6.30488e-08	1	2.15095e-07
chr1	92737500	92745499	12	29	0.534573	1.87065	1	1.4209e-07	1	4.44037e-07
chr1	92813500	92824499	11	33	0.435399	2.29675	1	1.2324e-10	1	8.45147e-10
chr1	93001000	93003499	7	15	0.616815	1.62123	1	0.000280987	1	0.000476552
chr1	93621500	93624999	5	22	0.321816	3.10736	1	7.69089e-11	1	5.68127e-10
chr1	93671500	93678999	11	26	0.54828	1.82389	1	8.12067e-07	1	2.13703e-06
chr1	93740500	93744499	6	19	0.43177	2.31605	1	2.25762e-07	1	6.81091e-07
chr1	94117500	94127999	18	40	0.571682	1.74922	1	1.11943e-08	1	4.61372e-08
chr1	94335000	94341499	14	19	0.925222	1.08082	1	0.0126104	1	0.01813
chr1	94681500	94686999	7	20	0.469954	2.12787	1	6.12245e-07	1	1.66203e-06
chr1	94851500	94856999	9	17	0.68535	1.45911	1	0.000579901	1	0.000946103
chr1	94869000	94886499	46	35	1.61057	0.620897	0.000839618	1	0.00608154	1
chr1	94999500	95009499	15	30	0.636712	1.57057	1	4.35973e-06	1	9.87935e-06
chr1	95279500	95287999	6	28	0.297773	3.35827	1	8.70002e-14	1	1.47295e-12
chr1	95470000	95482499	20	38	0.664262	1.50543	1	1.13407e-06	1	2.90927e-06
chr1	97171000	97171499	0	10	0.112148	8.91678	1	1.18568e-09	1	6.22563e-09
chr1	97663500	97666999	7	18	0.519423	1.92521	1	8.25769e-06	1	1.77319e-05
chr1	98487500	98497999	32	14	2.71399	0.368462	1.31604e-07	1	5.06178e-06	1
chr1	98813000	98828999	39	19	2.46726	0.405308	1.26857e-07	1	4.9775e-06	1
chr1	98889500	98907499	43	37	1.42841	0.700077	0.00969861	0.319093	0.0476456	0.396587
chr1	99122000	99127999	7	27	0.352466	2.83716	1	1.79822e-11	1	1.50607e-10
chr1	99450500	99475499	45	37	1.49334	0.669639	0.00394093	0.422292	0.0217731	0.512483
chr1	99729000	99741999	16	35	0.582547	1.7166	1	1.1136e-07	1	3.55416e-07
chr1	99969500	99973999	6	22	0.375453	2.66345	1	2.35904e-09	1	1.12877e-08
chr1	99987500	99994499	5	18	0.389567	2.56695	1	6.30488e-08	1	2.15095e-07
chr1	100019500	100022499	2	17	0.205605	4.8637	1	2.0199e-13	1	3.0925e-12
chr1	100583500	100604499	44	35	1.54204	0.648493	0.00238477	1	0.0143406	1
chr1	100835500	100842499	11	25	0.569368	1.75633	1	2.4997e-06	1	5.95027e-06
chr1	100946000	100952499	7	21	0.448593	2.22919	1	1.55672e-07	1	4.82157e-07
chr1	101214500	101223499	13	27	0.616815	1.62123	1	5.86553e-06	1	1.29117e-05
chr1	101601500	101609999	9	30	0.397945	2.51291	1	6.0621e-11	1	4.59809e-10
chr1	101685500	101690499	13	21	0.785037	1.27383	1	0.00134445	1	0.00210271
chr1	101865000	101875999	10	33	0.399116	2.50554	1	1.05305e-11	1	9.84275e-11
chr1	102050000	102056999	13	22	0.750905	1.33173	1	0.000597444	1	0.000971756
chr1	102077500	102083999	8	20	0.528698	1.89144	1	4.71976e-06	1	1.05536e-05
chr1	102361500	102374499	36	22	1.98453	0.503896	4.7805e-05	1	0.000580745	1
chr1	102484500	102490499	11	24	0.592142	1.68878	1	7.4206e-06	1	1.61342e-05
chr1	102739500	102746499	11	20	0.704931	1.41858	1	0.000390465	1	0.000650173
chr1	103084500	103098499	35	18	2.3374	0.427825	1.63351e-06	1	3.79616e-05	1
chr1	103772000	103782999	30	24	1.5297	0.653723	0.00950694	1	0.0470741	1
chr1	104978000	104981999	7	19	0.493452	2.02654	1	2.30198e-06	1	5.53129e-06
chr1	105192000	105196999	4	22	0.26818	3.72883	1	9.81912e-13	1	1.20344e-11
chr1	105596500	105598499	4	15	0.385509	2.59397	1	3.43429e-07	1	9.75218e-07
chr1	106116000	106122499	6	23	0.359809	2.77925	1	4.73408e-10	1	2.67852e-09
chr1	106577500	106590499	33	17	2.33019	0.42915	3.10963e-06	1	6.38428e-05	1
chr1	107239000	107268499	60	49	1.50503	0.664439	0.00102385	0.441459	0.00707552	0.533631
chr1	107687500	107698499	33	21	1.90652	0.524516	0.000187055	1	0.0017729	1
chr1	108653000	108668999	36	24	1.82577	0.547714	0.000255326	1	0.00229267	1
chr1	109085000	109095499	19	27	0.881164	1.13486	1	0.00246936	1	0.00376221
chr1	109121000	109126499	10	28	0.467929	2.13708	1	1.05589e-08	1	4.37743e-08
chr1	109132000	109143499	30	22	1.66272	0.601425	0.00291926	1	0.0170954	1
chr1	109259000	109268499	19	31	0.771019	1.29699	1	0.000143756	1	0.000254157
chr1	109529500	109548999	42	55	0.947251	1.05569	1	0.000345761	1	0.000579993
chr1	109611000	109616999	13	24	0.690833	1.44753	1	0.000104907	1	0.0001884
chr1	109640500	109643999	4	17	0.342675	2.91822	1	1.15242e-08	1	4.64503e-08
chr1	109704000	109722499	47	38	1.51831	0.658625	0.00246118	1	0.0146881	1
chr1	109978000	109985499	18	25	0.901499	1.10926	1	0.00440774	1	0.0065553
chr1	110170000	110174499	4	23	0.257006	3.89096	1	1.31851e-13	1	2.12682e-12
chr1	110187000	110198999	36	20	2.17354	0.460079	6.61592e-06	1	0.000116415	1
chr1	110307500	110311999	6	25	0.332131	3.01086	1	1.69342e-11	1	1.48045e-10
chr1	110544000	110552499	15	34	0.563945	1.77322	1	7.12729e-08	1	2.35251e-07
chr1	110580000	110583999	11	21	0.672889	1.48613	1	0.000154137	1	0.000270734
chr1	110593000	110602999	20	34	0.740178	1.35103	1	3.48581e-05	1	6.74157e-05
chr1	110843000	110861499	35	25	1.7081	0.585445	0.00100471	1	0.007012	1
chr1	110914500	110923499	19	29	0.82242	1.21592	1	0.000633197	1	0.00102658
chr1	110990500	110996999	7	20	0.469954	2.12787	1	6.12245e-07	1	1.66203e-06
chr1	111176500	111181999	7	19	0.493452	2.02654	1	2.30198e-06	1	5.53129e-06
chr1	111306000	111334499	66	46	1.75858	0.568641	7.51955e-06	1	0.000129967	1
chr1	111410500	111427499	43	23	2.26165	0.442154	4.07571e-07	1	1.24283e-05	1
chr1	111848000	111852499	5	19	0.370089	2.70205	1	1.26298e-08	1	5.00179e-08
chr1	112172500	112177499	7	17	0.54828	1.82389	1	2.82e-05	1	5.52913e-05
chr1	112242500	112246999	5	22	0.321816	3.10736	1	7.69089e-11	1	5.68127e-10
chr1	112705500	112723999	20	55	0.462611	2.16164	1	1.00633e-14	1	2.26243e-13
chr1	112743000	112749999	6	23	0.359809	2.77925	1	4.73408e-10	1	2.67852e-09
chr1	113216000	113222499	13	24	0.690833	1.44753	1	0.000104907	1	0.0001884
chr1	113655000	113672999	39	20	2.34977	0.425573	4.52582e-07	1	1.33106e-05	1
chr1	113966500	113968999	5	15	0.462611	2.16164	1	5.7517e-06	1	1.27262e-05
chr1	114103500	114121499	24	66	0.46031	2.17245	1	3.15569e-17	1	1.42376e-15
chr1	114514000	114519499	12	23	0.668216	1.49652	1	7.99179e-05	1	0.000145792
chr1	114600500	114614999	34	24	1.72708	0.579011	0.000947512	1	0.00674502	1
chr1	114676000	114687999	16	46	0.446206	2.24111	1	2.50135e-13	1	3.56892e-12
chr1	115330500	115334999	8	18	0.584351	1.7113	1	4.90504e-05	1	9.26349e-05
chr1	115420000	115427499	14	36	0.50012	1.99952	1	1.31118e-09	1	6.8358e-09
chr1	115731000	115733499	0	17	0.068535	14.5911	1	1.65645e-18	1	1.13103e-16
chr1	116003500	116008999	8	23	0.462611	2.16164	1	1.01189e-07	1	3.25495e-07
chr1	116252000	116264499	22	39	0.709337	1.40977	1	4.31724e-06	1	9.80655e-06
chr1	116393500	116403499	22	34	0.810671	1.23355	1	0.00020955	1	0.000361957
chr1	116527500	116534999	7	23	0.41121	2.43185	1	8.85773e-09	1	3.73815e-08
chr1	116817500	116821999	6	26	0.31983	3.12666	1	3.02731e-12	1	3.20602e-11
chr1	117035500	117040499	6	21	0.392519	2.54765	1	1.1276e-08	1	4.61407e-08
chr1	117102000	117124999	53	42	1.54921	0.645491	0.000964461	1	0.00681004	1
chr1	117347500	117350999	8	20	0.528698	1.89144	1	4.71976e-06	1	1.05536e-05
chr1	117562500	117567499	14	23	0.771019	1.29699	1	0.000708229	1	0.00114386
chr1	117588500	117590999	8	14	0.740178	1.35103	1	0.00289383	1	0.0043835
chr1	118128500	118129499	0	14	0.082242	12.1592	1	1.53529e-14	1	3.30576e-13
chr1	119482000	119488999	2	24	0.148036	6.75513	1	2.39487e-21	1	4.58431e-19
chr1	119525000	119537499	33	14	2.79623	0.357625	4.33373e-08	1	2.10743e-06	1
chr1	119790500	119799999	11	34	0.422959	2.3643	1	3.11111e-11	1	2.49764e-10
chr1	119914000	119925499	28	40	0.872567	1.14604	1	0.000345814	1	0.000579905
chr1	119936000	119938499	2	13	0.264349	3.78287	1	2.201e-09	1	1.07094e-08
chr1	124981500	124997499	43	12	4.17536	0.2395	8.46771e-16	1	1.7526e-12	1
chr1	125023000	125030499	12	24	0.641487	1.55888	1	3.04122e-05	1	5.91073e-05
chr1	145844500	145849999	17	21	1.00933	0.990753	1	0.0248837	1	0.0349041
chr1	147167500	147172499	3	26	0.18276	5.47166	1	2.32535e-19	1	2.0426e-17
chr1	147610500	147615999	5	23	0.308407	3.24246	1	1.28861e-11	1	1.17981e-10
chr1	147866000	147872499	18	28	0.80824	1.23726	1	0.000567261	1	0.000927721
chr1	150294500	150302999	11	26	0.54828	1.82389	1	8.12067e-07	1	2.13703e-06
chr1	150409000	150421999	20	33	0.761948	1.31243	1	7.68968e-05	1	0.000141465
chr1	150628500	150645999	41	23	2.15885	0.463209	2.28902e-06	1	5.01344e-05	1
chr1	150895500	150903499	5	30	0.238767	4.18818	1	1.67738e-17	1	8.26611e-16
chr1	150947500	150949999	3	16	0.290266	3.44512	1	1.03803e-09	1	5.62147e-09
chr1	151149500	151163499	17	40	0.541594	1.8464	1	2.34982e-09	1	1.13584e-08
chr1	151171000	151178499	11	25	0.569368	1.75633	1	2.4997e-06	1	5.95027e-06
chr1	151324500	151328499	26	6	4.75829	0.21016	3.02731e-12	1	1.11391e-09	1
chr1	151364000	151368999	3	19	0.246726	4.05308	1	2.13592e-12	1	2.42071e-11
chr1	151511500	151513499	1	14	0.164484	6.07962	1	1.53529e-14	1	3.30576e-13
chr1	151537500	151543499	4	22	0.26818	3.72883	1	9.81912e-13	1	1.20344e-11
chr1	151630500	151636499	4	26	0.22845	4.37733	1	2.52151e-16	1	8.94988e-15
chr1	151667500	151670999	4	15	0.385509	2.59397	1	3.43429e-07	1	9.75218e-07
chr1	151700000	151705499	6	25	0.332131	3.01086	1	1.69342e-11	1	1.48045e-10
chr1	151718500	151724999	18	22	1.01909	0.981272	0.42218	0.025184	1	0.0352909
chr1	151788500	151804999	43	48	1.10775	0.902731	0.22711	0.0136507	0.748057	0.0195526
chr1	151811500	151817499	10	29	0.452331	2.21077	1	2.82071e-09	1	1.30116e-08
chr1	151864000	151869999	11	21	0.672889	1.48613	1	0.000154137	1	0.000270734
chr1	152006000	152008499	1	18	0.129856	7.70085	1	7.05147e-20	1	6.9499e-18
chr1	152027000	152047999	55	44	1.53518	0.651388	0.00098749	1	0.00694304	1
chr1	152540000	152546999	14	21	0.841111	1.1889	1	0.00324056	1	0.00488481
chr1	152650000	152663999	19	43	0.560741	1.78336	1	2.08486e-09	1	1.01802e-08
chr1	152755500	152760999	4	22	0.26818	3.72883	1	9.81912e-13	1	1.20344e-11
chr1	152908000	152915499	16	23	0.873821	1.1444	1	0.00386299	1	0.00578174
chr1	153198500	153202999	8	16	0.653098	1.53116	1	0.00041937	1	0.000695785
chr1	153601000	153614999	30	49	0.76485	1.30745	1	3.36839e-06	1	7.82186e-06
chr1	153714500	153727499	40	43	1.14952	0.869929	0.168706	0.0303642	0.572543	0.0423314
chr1	153945500	153948999	3	18	0.259712	3.85043	1	1.76798e-11	1	1.51132e-10
chr1	154271500	154274499	5	20	0.352466	2.83716	1	2.41225e-09	1	1.13231e-08
chr1	154574500	154588499	37	24	1.87512	0.5333	0.000127642	1	0.00128208	1
chr1	154722500	154735999	49	28	2.12695	0.470157	5.11788e-07	1	1.4828e-05	1
chr1	154822000	154846499	64	48	1.63645	0.61108	8.20689e-05	1	0.000898444	1
chr1	154878500	154879999	2	14	0.246726	4.05308	1	2.36139e-10	1	1.5208e-09
chr1	154934500	154939999	6	23	0.359809	2.77925	1	4.73408e-10	1	2.67852e-09
chr1	155026500	155033999	11	23	0.616815	1.62123	1	2.12173e-05	1	4.25555e-05
chr1	155070500	155078999	16	29	0.699057	1.4305	1	3.63692e-05	1	7.01622e-05
chr1	155183500	155188499	3	21	0.224296	4.45839	1	2.70384e-14	1	4.93336e-13
chr1	155860500	155871499	8	30	0.358151	2.79212	1	3.42926e-12	1	3.57342e-11
chr1	156005000	156015499	17	35	0.616815	1.62123	1	4.5374e-07	1	1.24801e-06
chr1	156053000	156056499	9	16	0.725665	1.37805	1	0.00147629	1	0.0022999
chr1	156526500	156531999	5	23	0.308407	3.24246	1	1.28861e-11	1	1.17981e-10
chr1	156595000	156597999	12	16	0.943364	1.06004	1	0.0215953	1	0.0305202
chr1	156633500	156638499	4	20	0.293721	3.40459	1	4.79237e-11	1	3.72195e-10
chr1	156830000	156847999	53	42	1.54921	0.645491	0.000964461	1	0.00681004	1
chr1	157009500	157014499	11	18	0.779135	1.28348	1	0.00219543	1	0.00335954
chr1	157029500	157032999	11	19	0.740178	1.35103	1	0.000947043	1	0.001507
chr1	157131500	157135499	5	18	0.389567	2.56695	1	6.30488e-08	1	2.15095e-07
chr1	157157000	157171999	34	54	0.785037	1.27383	1	2.69586e-06	1	6.31819e-06
chr1	157538500	157541999	7	17	0.54828	1.82389	1	2.82e-05	1	5.52913e-05
chr1	157577000	157591499	36	23	1.90185	0.525805	0.000114343	1	0.00117559	1
chr1	157629000	157639999	30	14	2.5495	0.392234	1.11199e-06	1	2.80249e-05	1
chr1	157915000	157920999	7	24	0.394762	2.53317	1	1.9888e-09	1	9.80806e-09
chr1	158000000	158009999	16	35	0.582547	1.7166	1	1.1136e-07	1	3.55416e-07
chr1	158055000	158062999	13	29	0.575694	1.73703	1	7.23724e-07	1	1.93734e-06
chr1	159173500	159182499	27	16	2.03186	0.49216	0.000197006	1	0.00184556	1
chr1	159186000	159199999	31	25	1.51831	0.658625	0.00962848	1	0.0475055	1
chr1	159342000	159347499	5	18	0.389567	2.56695	1	6.30488e-08	1	2.15095e-07
chr1	159429000	159435999	17	26	0.82242	1.21592	1	0.00104899	1	0.00165942
chr1	159595500	159598499	8	17	0.616815	1.62123	1	0.000147131	1	0.000259515
chr1	159709500	159712999	5	16	0.435399	2.29675	1	1.34906e-06	1	3.41504e-06
chr1	159827500	159837499	12	44	0.356382	2.80598	1	1.81972e-16	1	6.76341e-15
chr1	159901000	159915999	37	41	1.11614	0.895944	0.225681	0.0220336	0.743795	0.0311078
chr1	159969500	159991499	60	43	1.71026	0.584707	3.84151e-05	1	0.00048463	1
chr1	160030000	160032999	6	17	0.479745	2.08444	1	3.73944e-06	1	8.62724e-06
chr1	160055500	160057999	11	19	0.740178	1.35103	1	0.000947043	1	0.001507
chr1	160144000	160156499	34	28	1.48886	0.671653	0.00985832	0.417001	0.0476457	0.506693
chr1	160186500	160188999	4	19	0.308407	3.24246	1	3.12892e-10	1	1.92741e-09
chr1	160211500	160219499	12	22	0.697269	1.43417	1	0.000202061	1	0.000349698
chr1	160714500	160736499	52	32	1.98128	0.504723	2.0985e-06	1	4.6987e-05	1
chr1	160747000	160757999	11	39	0.370089	2.70205	1	2.13743e-14	1	4.11292e-13
chr1	160759500	160780999	53	38	1.7081	0.585445	9.74771e-05	1	0.00103133	1
chr1	160828000	160834999	9	24	0.493452	2.02654	1	2.28095e-07	1	6.79646e-07
chr1	160914000	160923999	17	35	0.616815	1.62123	1	4.5374e-07	1	1.24801e-06
chr1	160950500	160955499	10	21	0.616815	1.62123	1	4.04198e-05	1	7.75248e-05
chr1	161040000	161045999	11	29	0.493452	2.02654	1	2.2661e-08	1	8.5971e-08
chr1	161119500	161128499	27	14	2.30278	0.434259	2.16693e-05	1	0.000306536	1
chr1	161154500	161159999	17	28	0.765701	1.30599	1	0.000232066	1	0.00039813
chr1	161429000	161433999	5	25	0.284684	3.51267	1	3.21169e-13	1	4.42422e-12
chr1	161875000	161881499	8	28	0.382851	2.61198	1	7.71067e-11	1	5.59848e-10
chr1	162165500	162168499	3	17	0.27414	3.64777	1	1.39124e-10	1	9.34529e-10
chr1	162235000	162244999	11	27	0.528698	1.89144	1	2.54724e-07	1	7.45971e-07
chr1	162347500	162352999	8	22	0.482725	2.07157	1	3.79773e-07	1	1.06771e-06
chr1	162461500	162467999	6	31	0.269857	3.70567	1	3.30636e-16	1	1.10265e-14
chr1	162624500	162624999	3	11	0.41121	2.43185	1	9.61983e-06	1	2.0339e-05
chr1	162629000	162634999	6	21	0.392519	2.54765	1	1.1276e-08	1	4.61407e-08
chr1	162646000	162654499	16	27	0.748989	1.33513	1	0.000197006	1	0.00034195
chr1	162656500	162667999	32	21	1.85044	0.540411	0.000383158	1	0.00319613	1
chr1	162688500	162692999	7	19	0.493452	2.02654	1	2.30198e-06	1	5.53129e-06
chr1	162698000	162700999	4	17	0.342675	2.91822	1	1.15242e-08	1	4.64503e-08
chr1	163188000	163191499	9	20	0.587443	1.70229	1	2.61943e-05	1	5.16771e-05
chr1	163226500	163227999	3	14	0.328968	3.03981	1	4.86655e-08	1	1.71886e-07
chr1	163578500	163584499	6	27	0.308407	3.24246	1	5.22154e-13	1	6.94723e-12
chr1	163738500	163745999	11	20	0.704931	1.41858	1	0.000390465	1	0.000650173
chr1	163933000	163936999	6	21	0.392519	2.54765	1	1.1276e-08	1	4.61407e-08
chr1	163979000	163991999	30	11	3.18688	0.313787	6.4403e-09	1	4.47122e-07	1
chr1	164619000	164628499	13	30	0.557123	1.79494	1	2.42334e-07	1	7.14233e-07
chr1	164638500	164648499	18	34	0.669685	1.49324	1	4.09959e-06	1	9.33393e-06
chr1	165081000	165084999	6	21	0.392519	2.54765	1	1.1276e-08	1	4.61407e-08
chr1	165253500	165263499	10	27	0.48464	2.06339	1	3.82426e-08	1	1.38182e-07
chr1	165279000	165290499	33	23	1.74764	0.5722	0.000888044	1	0.00639037	1
chr1	165294000	165300999	5	31	0.231306	4.32329	1	2.11538e-18	1	1.32425e-16
chr1	165358500	165361999	5	17	0.41121	2.43185	1	2.99402e-07	1	8.66999e-07
chr1	165889000	165896499	7	31	0.308407	3.24246	1	2.09959e-14	1	4.09241e-13
chr1	166087000	166089499	6	16	0.507965	1.96864	1	1.40929e-05	1	2.90453e-05
chr1	166285500	166292499	7	25	0.379578	2.6345	1	4.29743e-10	1	2.51838e-09
chr1	166327000	166335499	21	31	0.84812	1.17908	1	0.000763316	1	0.00122667
chr1	166741000	166749499	14	30	0.596918	1.67527	1	1.11199e-06	1	2.85973e-06
chr1	167079500	167081999	4	15	0.385509	2.59397	1	3.43429e-07	1	9.75218e-07
chr1	167289000	167293499	7	18	0.519423	1.92521	1	8.25769e-06	1	1.77319e-05
chr1	167435500	167440499	8	20	0.528698	1.89144	1	4.71976e-06	1	1.05536e-05
chr1	167548000	167552999	10	22	0.589997	1.69492	1	1.39527e-05	1	2.89419e-05
chr1	167561500	167565499	9	20	0.587443	1.70229	1	2.61943e-05	1	5.16771e-05
chr1	167666000	167680999	45	34	1.62134	0.616773	0.000815771	1	0.00594391	1
chr1	167792000	167803499	12	34	0.458205	2.18243	1	2.99468e-10	1	1.88182e-09
chr1	168151000	168156499	9	18	0.649279	1.54017	1	0.000216586	1	0.000373003
chr1	168777500	168789499	12	34	0.458205	2.18243	1	2.99468e-10	1	1.88182e-09
chr1	169262500	169267499	5	20	0.352466	2.83716	1	2.41225e-09	1	1.13231e-08
chr1	169911000	169914999	6	19	0.43177	2.31605	1	2.25762e-07	1	6.81091e-07
chr1	170097500	170104999	13	27	0.616815	1.62123	1	5.86553e-06	1	1.29117e-05
chr1	170220000	170226999	4	23	0.257006	3.89096	1	1.31851e-13	1	2.12682e-12
chr1	170532500	170539499	4	21	0.28037	3.56671	1	7.01171e-12	1	6.74607e-11
chr1	170540000	170551999	29	16	2.17699	0.459349	3.63692e-05	1	0.00046574	1
chr1	170819500	170825999	12	29	0.534573	1.87065	1	1.4209e-07	1	4.44037e-07
chr1	171223000	171237499	31	22	1.71635	0.58263	0.00157545	1	0.0101959	1
chr1	171555000	171561499	26	7	4.1635	0.240183	8.94897e-11	1	1.40452e-08	1
chr1	171964500	171966499	4	15	0.385509	2.59397	1	3.43429e-07	1	9.75218e-07
chr1	172340000	172344499	6	19	0.43177	2.31605	1	2.25762e-07	1	6.81091e-07
chr1	172631000	172634499	3	16	0.290266	3.44512	1	1.03803e-09	1	5.62147e-09
chr1	172676500	172684999	8	25	0.427026	2.34178	1	6.38796e-09	1	2.8187e-08
chr1	172889000	172889499	1	10	0.224296	4.45839	1	1.18568e-09	1	6.22563e-09
chr1	173371500	173377999	6	21	0.392519	2.54765	1	1.1276e-08	1	4.61407e-08
chr1	173522500	173531499	12	31	0.501162	1.99536	1	1.32045e-08	1	5.16634e-08
chr1	173709500	173712499	4	17	0.342675	2.91822	1	1.15242e-08	1	4.64503e-08
chr1	173792000	173794999	8	20	0.528698	1.89144	1	4.71976e-06	1	1.05536e-05
chr1	173857500	173864499	7	25	0.379578	2.6345	1	4.29743e-10	1	2.51838e-09
chr1	173867500	173870999	5	19	0.370089	2.70205	1	1.26298e-08	1	5.00179e-08
chr1	174834000	174840499	11	21	0.672889	1.48613	1	0.000154137	1	0.000270734
chr1	174920000	174924499	6	19	0.43177	2.31605	1	2.25762e-07	1	6.81091e-07
chr1	175681000	175691999	18	42	0.545092	1.83455	1	1.28978e-09	1	6.73908e-09
chr1	176531000	176547999	41	30	1.67137	0.598312	0.000705062	1	0.00521995	1
chr1	176911000	176916999	7	23	0.41121	2.43185	1	8.85773e-09	1	3.73815e-08
chr1	177195500	177199499	5	21	0.336444	2.97226	1	4.40219e-10	1	2.53579e-09
chr1	177248500	177249499	1	13	0.176233	5.67431	1	2.85101e-13	1	4.01933e-12
chr1	177738000	177753999	32	35	1.13083	0.884308	0.215342	0.03533	0.712487	0.0490211
chr1	177843000	177850999	8	23	0.462611	2.16164	1	1.01189e-07	1	3.25495e-07
chr1	177981000	177986999	5	20	0.352466	2.83716	1	2.41225e-09	1	1.13231e-08
chr1	178028000	178048999	36	67	0.67124	1.48978	1	6.24463e-10	1	3.47325e-09
chr1	178267500	178276499	7	26	0.36552	2.73583	1	8.94897e-11	1	6.34863e-10
chr1	178491000	178494999	5	21	0.336444	2.97226	1	4.40219e-10	1	2.53579e-09
chr1	178501500	178504499	5	17	0.41121	2.43185	1	2.99402e-07	1	8.66999e-07
chr1	178637500	178647499	10	34	0.387712	2.57923	1	2.41922e-12	1	2.61215e-11
chr1	178744500	178761999	41	34	1.48036	0.675513	0.0062436	0.402516	0.0319227	0.490839
chr1	178954000	178956999	6	18	0.454495	2.20024	1	9.41891e-07	1	2.4466e-06
chr1	179427500	179445499	47	31	1.85044	0.540411	3.19838e-05	1	0.00041931	1
chr1	179537000	179551999	38	19	2.40558	0.415701	3.34216e-07	1	1.0561e-05	1
chr1	179559500	179566499	9	24	0.493452	2.02654	1	2.28095e-07	1	6.79646e-07
chr1	179622500	179627499	3	19	0.246726	4.05308	1	2.13592e-12	1	2.42071e-11
chr1	179733500	179744499	21	40	0.661948	1.51069	1	5.97579e-07	1	1.63266e-06
chr1	179808500	179818999	13	38	0.442841	2.25814	1	1.35798e-11	1	1.22204e-10
chr1	179842000	179850499	9	34	0.352466	2.83716	1	1.32431e-13	1	2.09836e-12
chr1	180434000	180443499	16	29	0.699057	1.4305	1	3.63692e-05	1	7.01622e-05
chr1	180526000	180529499	9	17	0.68535	1.45911	1	0.000579901	1	0.000946103
chr1	180651500	180655499	8	20	0.528698	1.89144	1	4.71976e-06	1	1.05536e-05
chr1	181454500	181458499	6	17	0.479745	2.08444	1	3.73944e-06	1	8.62724e-06
chr1	181788000	181791999	7	15	0.616815	1.62123	1	0.000280987	1	0.000476552
chr1	182234500	182236999	1	17	0.13707	7.29554	1	1.65645e-18	1	1.13103e-16
chr1	182778000	182782499	3	18	0.259712	3.85043	1	1.76798e-11	1	1.51132e-10
chr1	182850500	182860999	30	9	3.82425	0.261489	6.0621e-11	1	1.04559e-08	1
chr1	182891000	182896499	7	19	0.493452	2.02654	1	2.30198e-06	1	5.53129e-06
chr1	183021500	183034999	42	16	3.12036	0.320476	3.91185e-11	1	7.40257e-09	1
chr1	183068500	183074999	9	23	0.514012	1.94548	1	7.93376e-07	1	2.1049e-06
chr1	183140500	183147499	10	26	0.50259	1.98969	1	1.33866e-07	1	4.21439e-07
chr1	183325000	183333499	15	34	0.563945	1.77322	1	7.12729e-08	1	2.35251e-07
chr1	183552500	183557999	18	25	0.901499	1.10926	1	0.00440774	1	0.0065553
chr1	183567500	183570499	4	16	0.362832	2.75609	1	6.46891e-08	1	2.15756e-07
chr1	183782000	183787499	11	21	0.672889	1.48613	1	0.000154137	1	0.000270734
chr1	184151000	184160999	14	28	0.638084	1.56719	1	8.31492e-06	1	1.77444e-05
chr1	184815500	184821999	12	27	0.572757	1.74594	1	1.34664e-06	1	3.42963e-06
chr1	185141500	185171499	64	38	2.05605	0.48637	5.41087e-08	1	2.53446e-06	1
chr1	185471000	185478999	13	22	0.750905	1.33173	1	0.000597444	1	0.000971756
chr1	185628500	185632499	9	18	0.649279	1.54017	1	0.000216586	1	0.000373003
chr1	185651000	185661999	12	23	0.668216	1.49652	1	7.99179e-05	1	0.000145792
chr1	186146000	186150999	9	20	0.587443	1.70229	1	2.61943e-05	1	5.16771e-05
chr1	186527000	186543999	17	45	0.482725	2.07157	1	6.76091e-12	1	6.6104e-11
chr1	186984000	186991499	6	23	0.359809	2.77925	1	4.73408e-10	1	2.67852e-09
chr1	188572000	188578499	7	23	0.41121	2.43185	1	8.85773e-09	1	3.73815e-08
chr1	188731000	188741999	32	16	2.39469	0.41759	2.28951e-06	1	4.95876e-05	1
chr1	191107000	191117499	15	23	0.82242	1.21592	1	0.00174264	1	0.00268965
chr1	191206000	191218999	32	16	2.39469	0.41759	2.28951e-06	1	4.95876e-05	1
chr1	192586000	192596999	32	21	1.85044	0.540411	0.000383158	1	0.00319613	1
chr1	193296000	193315999	57	41	1.70358	0.586998	6.26523e-05	1	0.000722169	1
chr1	193380000	193384499	7	26	0.36552	2.73583	1	8.94897e-11	1	6.34863e-10
chr1	193401000	193420499	54	36	1.83377	0.545323	1.30562e-05	1	0.000204527	1
chr1	193488500	193492499	2	23	0.154204	6.48493	1	3.70276e-20	1	4.15663e-18
chr1	193493500	193509499	43	27	1.93856	0.515847	2.08839e-05	1	0.00029926	1
chr1	193588500	193604999	39	21	2.24296	0.445839	1.46208e-06	1	3.49086e-05	1
chr1	194194000	194211499	40	28	1.7441	0.573363	0.000345814	1	0.00292291	1
chr1	194829500	194837499	14	30	0.596918	1.67527	1	1.11199e-06	1	2.85973e-06
chr1	195306000	195314999	7	31	0.308407	3.24246	1	2.09959e-14	1	4.09241e-13
chr1	196732500	196739499	4	23	0.257006	3.89096	1	1.31851e-13	1	2.12682e-12
chr1	196893000	196899499	13	23	0.719617	1.38963	1	0.000255186	1	0.00043601
chr1	197615500	197617499	1	15	0.154204	6.48493	1	7.75418e-16	1	2.4294e-14
chr1	198060000	198077499	40	27	1.80639	0.553591	0.000168669	1	0.00162185	1
chr1	198594000	198604499	33	18	2.20755	0.452991	1.0015e-05	1	0.000163944	1
chr1	198798000	198802999	10	19	0.678496	1.47385	1	0.000298339	1	0.000504457
chr1	199172500	199184999	39	20	2.34977	0.425573	4.52582e-07	1	1.33106e-05	1
chr1	199324000	199329499	10	22	0.589997	1.69492	1	1.39527e-05	1	2.89419e-05
chr1	200105000	200112499	12	25	0.616815	1.62123	1	1.11497e-05	1	2.34315e-05
chr1	200251500	200255999	8	19	0.555133	1.80137	1	1.55743e-05	1	3.18251e-05
chr1	200302500	200308499	8	20	0.528698	1.89144	1	4.71976e-06	1	1.05536e-05
chr1	200352500	200382999	74	55	1.65218	0.60526	2.01728e-05	1	0.000291213	1
chr1	200730500	200743499	22	36	0.766851	1.30403	1	4.7805e-05	1	9.06137e-05
chr1	200993000	200998499	20	24	1.03625	0.965019	0.392594	0.0255321	1	0.0357272
chr1	201045500	201051499	5	23	0.308407	3.24246	1	1.28861e-11	1	1.17981e-10
chr1	201294000	201314499	34	60	0.70782	1.41279	1	2.71699e-08	1	1.0087e-07
chr1	201343000	201365999	55	46	1.46986	0.680338	0.00252144	0.378358	0.014916	0.463822
chr1	201540500	201552499	37	18	2.46726	0.405308	2.39824e-07	1	8.14566e-06	1
chr1	201708000	201717499	31	23	1.64484	0.607962	0.00304903	1	0.0177987	1
chr1	201753500	201758999	16	22	0.911813	1.09672	1	0.00742978	1	0.010848
chr1	201967000	201972499	9	19	0.616815	1.62123	1	7.70822e-05	1	0.000141398
chr1	202095500	202131499	86	76	1.39384	0.717442	0.001317	0.206145	0.00880733	0.263925
chr1	202212000	202221999	19	35	0.68535	1.45911	1	5.26696e-06	1	1.17077e-05
chr1	202670500	202681999	25	36	0.866875	1.15357	1	0.000535356	1	0.000877058
chr1	202701500	202704999	1	18	0.129856	7.70085	1	7.05147e-20	1	6.9499e-18
chr1	202887500	202897999	17	33	0.653098	1.53116	1	3.10963e-06	1	7.23366e-06
chr1	202998500	203006999	15	35	0.54828	1.82389	1	2.37611e-08	1	8.97845e-08
chr1	203132500	203145499	20	46	0.551196	1.81424	1	3.85412e-10	1	2.30177e-09
chr1	203425000	203428499	8	19	0.555133	1.80137	1	1.55743e-05	1	3.18251e-05
chr1	203681500	203686499	7	19	0.493452	2.02654	1	2.30198e-06	1	5.53129e-06
chr1	203759500	203762999	4	19	0.308407	3.24246	1	3.12892e-10	1	1.92741e-09
chr1	203943000	203948499	9	22	0.536361	1.86442	1	2.65297e-06	1	6.25263e-06
chr1	204020500	204022999	7	15	0.616815	1.62123	1	0.000280987	1	0.000476552
chr1	204061000	204074499	34	23	1.79904	0.555851	0.000460247	1	0.00369491	1
chr1	204234000	204238499	7	20	0.469954	2.12787	1	6.12245e-07	1	1.66203e-06
chr1	204249500	204257499	8	35	0.308407	3.24246	1	8.41135e-16	1	2.52082e-14
chr1	204261500	204270499	11	28	0.510467	1.95899	1	7.72346e-08	1	2.53413e-07
chr1	204685000	204689499	5	18	0.389567	2.56695	1	6.30488e-08	1	2.15095e-07
chr1	204854500	204859499	3	20	0.234977	4.25573	1	2.45907e-13	1	3.58742e-12
chr1	205385000	205388999	6	20	0.41121	2.43185	1	5.16103e-08	1	1.79719e-07
chr1	205412500	205429499	55	28	2.38218	0.419783	2.77202e-09	1	2.20669e-07	1
chr1	205632000	205640499	16	28	0.723162	1.38282	1	8.60106e-05	1	0.000156287
chr1	205788000	205794499	5	27	0.264349	3.78287	1	6.89638e-15	1	1.59039e-13
chr1	205824000	205829499	4	24	0.246726	4.05308	1	1.7005e-14	1	3.54175e-13
chr1	206021000	206022999	1	15	0.154204	6.48493	1	7.75418e-16	1	2.4294e-14
chr1	206527500	206542499	22	58	0.480907	2.07941	1	1.22447e-14	1	2.73061e-13
chr1	206557500	206566499	13	27	0.616815	1.62123	1	5.86553e-06	1	1.29117e-05
chr1	206687500	206700999	26	49	0.66616	1.50114	1	6.0373e-08	1	2.0798e-07
chr1	206832500	206842999	20	39	0.647656	1.54403	1	4.52582e-07	1	1.24596e-06
chr1	206974000	206982499	15	31	0.616815	1.62123	1	1.62832e-06	1	4.00948e-06
chr1	207813000	207816999	7	18	0.519423	1.92521	1	8.25769e-06	1	1.77319e-05
chr1	207888500	207895999	13	30	0.557123	1.79494	1	2.42334e-07	1	7.14233e-07
chr1	208411500	208417999	14	25	0.711709	1.40507	1	0.000133008	1	0.00023581
chr1	209475500	209489999	20	43	0.588778	1.69843	1	9.09606e-09	1	3.80527e-08
chr1	209642500	209646999	5	19	0.370089	2.70205	1	1.26298e-08	1	5.00179e-08
chr1	209731500	209743999	26	36	0.900216	1.11084	1	0.00105945	1	0.00167413
chr1	209754000	209757499	10	21	0.616815	1.62123	1	4.04198e-05	1	7.75248e-05
chr1	209797000	209802499	8	18	0.584351	1.7113	1	4.90504e-05	1	9.26349e-05
chr1	210551500	210559999	9	35	0.342675	2.91822	1	2.66586e-14	1	4.98489e-13
chr1	210829500	210832499	3	17	0.27414	3.64777	1	1.39124e-10	1	9.34529e-10
chr1	210863000	210868999	6	23	0.359809	2.77925	1	4.73408e-10	1	2.67852e-09
chr1	211336000	211343499	5	24	0.296071	3.37757	1	2.07405e-12	1	2.42187e-11
chr1	211476500	211480499	8	18	0.584351	1.7113	1	4.90504e-05	1	9.26349e-05
chr1	211940000	211945999	9	22	0.536361	1.86442	1	2.65297e-06	1	6.25263e-06
chr1	212460500	212481999	47	41	1.40986	0.709289	0.00937876	0.28441	0.0466067	0.356493
chr1	212508500	212515499	8	27	0.396524	2.52192	1	3.48023e-10	1	2.09434e-09
chr1	212524000	212529999	10	22	0.589997	1.69492	1	1.39527e-05	1	2.89419e-05
chr1	212605500	212612499	8	27	0.396524	2.52192	1	3.48023e-10	1	2.09434e-09
chr1	212727000	212737999	33	20	1.99731	0.500675	7.68968e-05	1	0.000856259	1
chr1	212992000	213017499	44	33	1.63275	0.612465	0.000790379	1	0.00577414	1
chr1	213089000	213099999	15	27	0.704931	1.41858	1	6.94826e-05	1	0.00012836
chr1	213444000	213457499	17	36	0.600144	1.66627	1	1.66537e-07	1	5.11505e-07
chr1	213578000	213594999	41	19	2.59062	0.386008	1.70229e-08	1	9.57095e-07	1
chr1	213771000	213787999	46	21	2.63548	0.379437	1.74042e-09	1	1.53286e-07	1
chr1	213824500	213826499	3	14	0.328968	3.03981	1	4.86655e-08	1	1.71886e-07
chr1	213892000	213898499	10	20	0.646187	1.54754	1	0.000112251	1	0.000200556
chr1	213917000	213919499	4	16	0.362832	2.75609	1	6.46891e-08	1	2.15756e-07
chr1	213934000	213947999	36	21	2.07474	0.481988	1.85364e-05	1	0.000273065	1
chr1	214047000	214060999	29	42	0.860672	1.16188	1	0.000196133	1	0.000340953
chr1	214251000	214258999	11	29	0.493452	2.02654	1	2.2661e-08	1	8.5971e-08
chr1	214273500	214280499	13	28	0.595545	1.67913	1	2.09416e-06	1	5.09741e-06
chr1	214558000	214561499	5	20	0.352466	2.83716	1	2.41225e-09	1	1.13231e-08
chr1	214662500	214666999	10	23	0.565414	1.76862	1	4.62459e-06	1	1.04246e-05
chr1	215143000	215152499	18	24	0.937559	1.0666	1	0.00816367	1	0.0118908
chr1	216052500	216056499	2	18	0.194784	5.1339	1	1.71564e-14	1	3.44335e-13
chr1	216935000	216953499	42	28	1.82918	0.546695	9.41508e-05	1	0.000999968	1
chr1	217085000	217097499	20	41	0.616815	1.62123	1	6.71513e-08	1	2.22245e-07
chr1	217305500	217317999	33	26	1.55346	0.643724	0.00580766	1	0.0308909	1
chr1	218429500	218437999	11	26	0.54828	1.82389	1	8.12067e-07	1	2.13703e-06
chr1	218515000	218535499	44	33	1.63275	0.612465	0.000790379	1	0.00577414	1
chr1	218674000	218684499	9	24	0.493452	2.02654	1	2.28095e-07	1	6.79646e-07
chr1	218775000	218784499	12	23	0.668216	1.49652	1	7.99179e-05	1	0.000145792
chr1	219306000	219328499	52	27	2.33508	0.42825	1.30492e-08	1	7.9146e-07	1
chr1	219341000	219347499	8	23	0.462611	2.16164	1	1.01189e-07	1	3.25495e-07
chr1	219663000	219671999	15	34	0.563945	1.77322	1	7.12729e-08	1	2.35251e-07
chr1	219703000	219711999	4	23	0.257006	3.89096	1	1.31851e-13	1	2.12682e-12
chr1	219780000	219782499	3	17	0.27414	3.64777	1	1.39124e-10	1	9.34529e-10
chr1	220325500	220331499	14	21	0.841111	1.1889	1	0.00324056	1	0.00488481
chr1	220342500	220347499	5	19	0.370089	2.70205	1	1.26298e-08	1	5.00179e-08
chr1	220415500	220428499	31	25	1.51831	0.658625	0.00962848	1	0.0475055	1
chr1	220643000	220646499	2	19	0.185044	5.40411	1	1.38498e-15	1	3.84774e-14
chr1	220910500	220914999	7	15	0.616815	1.62123	1	0.000280987	1	0.000476552
chr1	221214000	221221499	7	27	0.352466	2.83716	1	1.79822e-11	1	1.50607e-10
chr1	221458000	221467499	9	25	0.474473	2.1076	1	6.31336e-08	1	2.12775e-07
chr1	221886000	221891999	6	20	0.41121	2.43185	1	5.16103e-08	1	1.79719e-07
chr1	222234500	222237999	11	18	0.779135	1.28348	1	0.00219543	1	0.00335954
chr1	222401000	222403999	8	16	0.653098	1.53116	1	0.00041937	1	0.000695785
chr1	222940500	222946499	3	20	0.234977	4.25573	1	2.45907e-13	1	3.58742e-12
chr1	223244000	223275499	67	43	1.90652	0.524516	4.38985e-07	1	1.32279e-05	1
chr1	223286000	223288499	3	16	0.290266	3.44512	1	1.03803e-09	1	5.62147e-09
chr1	223640000	223649999	20	32	0.785037	1.27383	1	0.000165059	1	0.000288357
chr1	223676500	223682499	8	24	0.444107	2.25171	1	2.5914e-08	1	9.67278e-08
chr1	224115500	224116499	2	12	0.284684	3.51267	1	1.91684e-08	1	7.32579e-08
chr1	224161000	224169499	14	29	0.616815	1.62123	1	3.08892e-06	1	7.20778e-06
chr1	224208500	224216499	15	32	0.598124	1.6719	1	5.9045e-07	1	1.61625e-06
chr1	224220000	224224999	6	24	0.345416	2.89506	1	9.1277e-11	1	6.3892e-10
chr1	224620000	224627499	10	30	0.43774	2.28446	1	7.29802e-10	1	4.03004e-09
chr1	224675000	224684999	16	27	0.748989	1.33513	1	0.000197006	1	0.00034195
chr1	224710000	224717999	17	29	0.740178	1.35103	1	0.000104029	1	0.000187341
chr1	224860000	224874999	42	14	3.53641	0.282773	6.04216e-13	1	3.22729e-10	1
chr1	225393000	225399999	13	23	0.719617	1.38963	1	0.000255186	1	0.00043601
chr1	225426000	225434999	17	35	0.616815	1.62123	1	4.5374e-07	1	1.24801e-06
chr1	225466000	225473499	17	25	0.854051	1.17089	1	0.00212165	1	0.00325296
chr1	225478500	225479999	0	14	0.082242	12.1592	1	1.53529e-14	1	3.30576e-13
chr1	225736000	225740999	7	20	0.469954	2.12787	1	6.12245e-07	1	1.66203e-06
chr1	225910500	225916499	7	27	0.352466	2.83716	1	1.79822e-11	1	1.50607e-10
chr1	225975000	225981999	10	26	0.50259	1.98969	1	1.33866e-07	1	4.21439e-07
chr1	226209500	226210999	2	13	0.264349	3.78287	1	2.201e-09	1	1.07094e-08
chr1	226306500	226313999	20	33	0.761948	1.31243	1	7.68968e-05	1	0.000141465
chr1	226404500	226406999	2	16	0.217699	4.59349	1	2.25413e-12	1	2.47506e-11
chr1	226470500	226479999	35	20	2.11479	0.472859	1.53853e-05	1	0.000234577	1
chr1	226520500	226527499	11	22	0.643633	1.55368	1	5.8352e-05	1	0.000108628
chr1	226696500	226704499	13	28	0.595545	1.67913	1	2.09416e-06	1	5.09741e-06
chr1	226710000	226734499	59	45	1.60908	0.621472	0.000219715	1	0.00202339	1
chr1	226776000	226790499	37	25	1.803	0.554632	0.000278285	1	0.00245163	1
chr1	226972500	226976499	4	19	0.308407	3.24246	1	3.12892e-10	1	1.92741e-09
chr1	227030500	227033499	0	15	0.0771019	12.9699	1	7.75418e-16	1	2.4294e-14
chr1	227401500	227407999	6	25	0.332131	3.01086	1	1.69342e-11	1	1.48045e-10
chr1	227508500	227513999	14	18	0.973918	1.02678	1	0.0233301	1	0.0328486
chr1	227739000	227743499	3	21	0.224296	4.45839	1	2.70384e-14	1	4.93336e-13
chr1	227896000	227899999	3	17	0.27414	3.64777	1	1.39124e-10	1	9.34529e-10
chr1	228313000	228326999	40	22	2.19908	0.454736	1.84633e-06	1	4.19364e-05	1
chr1	228361500	228378999	46	33	1.70531	0.586403	0.000248932	1	0.00224745	1
chr1	228467000	228488999	53	37	1.75305	0.570433	5.03912e-05	1	0.000606159	1
chr1	228737000	228743499	6	30	0.278562	3.58987	1	2.18699e-15	1	5.64053e-14
chr1	228860500	228867999	14	26	0.68535	1.45911	1	5.46181e-05	1	0.000102356
chr1	229121000	229130999	15	34	0.563945	1.77322	1	7.12729e-08	1	2.35251e-07
chr1	229307500	229310999	3	18	0.259712	3.85043	1	1.76798e-11	1	1.51132e-10
chr1	229646500	229648499	4	16	0.362832	2.75609	1	6.46891e-08	1	2.15756e-07
chr1	229773500	229791999	49	21	2.8037	0.356671	7.08052e-11	1	1.18424e-08	1
chr1	229825000	229837499	30	24	1.5297	0.653723	0.00950694	1	0.0470741	1
chr1	229937000	229942499	8	20	0.528698	1.89144	1	4.71976e-06	1	1.05536e-05
chr1	229970000	229973999	12	17	0.890955	1.12239	1	0.0111163	1	0.0160216
chr1	230212500	230221499	26	14	2.22053	0.450342	5.46181e-05	1	0.00065368	1
chr1	230511000	230518999	9	26	0.4569	2.18866	1	1.68458e-08	1	6.50877e-08
chr1	230523000	230527999	3	24	0.197381	5.06635	1	2.78039e-17	1	1.30789e-15
chr1	230696500	230705499	8	27	0.396524	2.52192	1	3.48023e-10	1	2.09434e-09
chr1	230743000	230746999	5	18	0.389567	2.56695	1	6.30488e-08	1	2.15095e-07
chr1	230901500	230902999	2	17	0.205605	4.8637	1	2.0199e-13	1	3.0925e-12
chr1	230979500	230991999	19	32	0.747654	1.33752	1	6.55653e-05	1	0.000121462
chr1	230995000	231001499	6	27	0.308407	3.24246	1	5.22154e-13	1	6.94723e-12
chr1	231297000	231300999	9	16	0.725665	1.37805	1	0.00147629	1	0.0022999
chr1	231496500	231500999	11	19	0.740178	1.35103	1	0.000947043	1	0.001507
chr1	231614000	231619999	7	21	0.448593	2.22919	1	1.55672e-07	1	4.82157e-07
chr1	231621500	231643999	62	33	2.28584	0.437475	1.73295e-09	1	1.53445e-07	1
chr1	231690000	231694499	6	19	0.43177	2.31605	1	2.25762e-07	1	6.81091e-07
chr1	231700500	231707999	15	24	0.789523	1.26659	1	0.000821428	1	0.00131622
chr1	231737500	231741999	4	21	0.28037	3.56671	1	7.01171e-12	1	6.74607e-11
chr1	231778000	231783499	4	18	0.324639	3.08034	1	1.94726e-09	1	9.78237e-09
chr1	231835500	231853999	44	37	1.46088	0.68452	0.00624367	0.36991	0.0318542	0.453819
chr1	232015500	232030999	38	29	1.60372	0.623551	0.00211633	1	0.0130877	1
chr1	232037500	232052999	37	19	2.3439	0.42664	8.59287e-07	1	2.22314e-05	1
chr1	232422000	232453499	64	68	1.16211	0.8605	0.105368	0.0131947	0.376292	0.0189363
chr1	232461000	232466999	1	24	0.0986904	10.1327	1	1.55391e-28	1	2.45045e-25
chr1	232751500	232758499	7	22	0.429089	2.33052	1	3.79105e-08	1	1.38708e-07
chr1	232768500	232775999	10	28	0.467929	2.13708	1	1.05589e-08	1	4.37743e-08
chr1	234385500	234400499	43	22	2.35999	0.423731	1.25964e-07	1	5.01374e-06	1
chr1	234628000	234648999	42	29	1.7682	0.565546	0.000196133	1	0.00184364	1
chr1	234780500	234782999	9	30	0.397945	2.51291	1	6.0621e-11	1	4.59809e-10
chr1	235046000	235053499	13	29	0.575694	1.73703	1	7.23724e-07	1	1.93734e-06
chr1	235166000	235172499	16	25	0.806604	1.23977	1	0.000935466	1	0.00149318
chr1	235453500	235463499	17	34	0.634438	1.5762	1	1.20403e-06	1	3.08111e-06
chr1	235540500	235545499	10	21	0.616815	1.62123	1	4.04198e-05	1	7.75248e-05
chr1	235643000	235651499	14	27	0.660873	1.51315	1	2.16693e-05	1	4.32394e-05
chr1	236288000	236323999	70	77	1.12292	0.890536	0.153206	0.00427036	0.526303	0.00635412
chr1	236470500	236472999	1	18	0.129856	7.70085	1	7.05147e-20	1	6.9499e-18
chr1	236538500	236550999	38	21	2.18689	0.457271	3.49347e-06	1	7.00724e-05	1
chr1	236556500	236558499	6	17	0.479745	2.08444	1	3.73944e-06	1	8.62724e-06
chr1	237093000	237103499	8	36	0.300072	3.33253	1	1.46619e-16	1	5.53641e-15
chr1	237697000	237700999	4	17	0.342675	2.91822	1	1.15242e-08	1	4.64503e-08
chr1	238873000	238882499	6	27	0.308407	3.24246	1	5.22154e-13	1	6.94723e-12
chr1	239496000	239502499	3	26	0.18276	5.47166	1	2.32535e-19	1	2.0426e-17
chr1	240173500	240182999	33	19	2.09717	0.476833	2.90724e-05	1	0.00038821	1
chr1	240214000	240236499	39	27	1.76233	0.567431	0.000323647	1	0.00277378	1
chr1	240415500	240415999	5	10	0.672889	1.48613	1	0.00313209	1	0.0047269
chr1	240701000	240711499	10	30	0.43774	2.28446	1	7.29802e-10	1	4.03004e-09
chr1	241233500	241238499	11	19	0.740178	1.35103	1	0.000947043	1	0.001507
chr1	241465000	241473999	10	28	0.467929	2.13708	1	1.05589e-08	1	4.37743e-08
chr1	241531000	241536999	9	22	0.536361	1.86442	1	2.65297e-06	1	6.25263e-06
chr1	241694500	241699499	3	18	0.259712	3.85043	1	1.76798e-11	1	1.51132e-10
chr1	241740000	241747499	11	26	0.54828	1.82389	1	8.12067e-07	1	2.13703e-06
chr1	242220500	242223499	4	18	0.324639	3.08034	1	1.94726e-09	1	9.78237e-09
chr1	243816500	243833499	36	22	1.98453	0.503896	4.7805e-05	1	0.000580745	1
chr1	244157500	244169499	34	25	1.66066	0.602172	0.00183848	1	0.0116078	1
chr1	244278500	244297499	25	59	0.534573	1.87065	1	7.20584e-13	1	9.08023e-12
chr1	244391500	244396499	7	21	0.448593	2.22919	1	1.55672e-07	1	4.82157e-07
chr1	244470500	244473499	6	17	0.479745	2.08444	1	3.73944e-06	1	8.62724e-06
chr1	244667000	244670999	3	16	0.290266	3.44512	1	1.03803e-09	1	5.62147e-09
chr1	244727000	244731499	9	22	0.536361	1.86442	1	2.65297e-06	1	6.25263e-06
chr1	244917500	244919999	6	16	0.507965	1.96864	1	1.40929e-05	1	2.90453e-05
chr1	245030000	245035999	12	25	0.616815	1.62123	1	1.11497e-05	1	2.34315e-05
chr1	245527500	245532999	9	22	0.536361	1.86442	1	2.65297e-06	1	6.25263e-06
chr1	245567000	245572499	13	26	0.63966	1.56333	1	1.58862e-05	1	3.22734e-05
chr1	245977000	245986999	11	34	0.422959	2.3643	1	3.11111e-11	1	2.49764e-10
chr1	246049000	246056499	5	28	0.255234	3.91798	1	9.58742e-16	1	2.80971e-14
chr1	246157500	246166999	24	36	0.833534	1.19971	1	0.000255326	1	0.000435463
chr1	246346500	246362499	39	27	1.76233	0.567431	0.000323647	1	0.00277378	1
chr1	246533500	246543999	13	41	0.41121	2.43185	1	2.25252e-13	1	3.37531e-12
chr1	246700000	246714499	33	24	1.67774	0.596041	0.00175592	1	0.0111632	1
chr1	246999000	247015499	11	53	0.27414	3.64777	1	1.41884e-24	1	7.11914e-22
chr1	247175000	247180999	10	22	0.589997	1.69492	1	1.39527e-05	1	2.89419e-05
chr1	247517500	247539999	51	36	1.73375	0.576784	8.76242e-05	1	0.000942131	1
chr1	247985500	247993999	11	28	0.510467	1.95899	1	7.72346e-08	1	2.53413e-07
chr1	248181000	248186999	6	26	0.31983	3.12666	1	3.02731e-12	1	3.20602e-11
chr1	248358000	248363499	7	16	0.580532	1.72256	1	9.14606e-05	1	0.000165436
chr2	1095000	1104999	13	32	0.523358	1.91074	1	2.48029e-08	1	9.33484e-08
chr2	1189500	1211499	41	18	2.72697	0.366707	3.84351e-09	1	2.93276e-07	1
chr2	1881500	1893499	13	39	0.43177	2.31605	1	3.54757e-12	1	3.61481e-11
chr2	2285500	2309499	42	36	1.43368	0.697507	0.00976082	0.328517	0.0476754	0.407308
chr2	2562000	2563499	6	12	0.664262	1.50543	1	0.00159331	1	0.00246608
chr2	2677500	2683499	8	21	0.504667	1.98151	1	1.36782e-06	1	3.42794e-06
chr2	2688000	2702499	19	47	0.514012	1.94548	1	2.41351e-11	1	1.95036e-10
chr2	2861000	2866999	3	20	0.234977	4.25573	1	2.45907e-13	1	3.58742e-12
chr2	2948000	2961999	32	12	3.13152	0.319334	3.84693e-09	1	2.88878e-07	1
chr2	3041000	3052999	33	24	1.67774	0.596041	0.00175592	1	0.0111632	1
chr2	3427000	3431499	7	18	0.519423	1.92521	1	8.25769e-06	1	1.77319e-05
chr2	3533500	3539999	9	26	0.4569	2.18866	1	1.68458e-08	1	6.50877e-08
chr2	3651000	3656999	15	29	0.657936	1.5199	1	1.13235e-05	1	2.37079e-05
chr2	4753000	4757999	8	18	0.584351	1.7113	1	4.90504e-05	1	9.26349e-05
chr2	5097000	5102999	10	19	0.678496	1.47385	1	0.000298339	1	0.000504457
chr2	5361000	5381499	45	20	2.70224	0.370064	1.12909e-09	1	1.06225e-07	1
chr2	5596500	5599999	2	16	0.217699	4.59349	1	2.25413e-12	1	2.47506e-11
chr2	5815500	5818499	4	15	0.385509	2.59397	1	3.43429e-07	1	9.75218e-07
chr2	5962500	5980999	49	19	3.08407	0.324246	2.29682e-12	1	8.7427e-10	1
chr2	6073000	6079999	6	27	0.308407	3.24246	1	5.22154e-13	1	6.94723e-12
chr2	6279000	6282999	11	15	0.925222	1.08082	1	0.0204629	1	0.0289718
chr2	6664000	6669999	4	23	0.257006	3.89096	1	1.31851e-13	1	2.12682e-12
chr2	6869000	6877999	11	31	0.462611	2.16164	1	1.77462e-09	1	9.04267e-09
chr2	7167000	7171499	8	18	0.584351	1.7113	1	4.90504e-05	1	9.26349e-05
chr2	7634500	7643499	25	18	1.68812	0.592373	0.00440774	1	0.0241188	1
chr2	7658500	7668999	16	29	0.699057	1.4305	1	3.63692e-05	1	7.01622e-05
chr2	8192500	8201999	16	25	0.806604	1.23977	1	0.000935466	1	0.00149318
chr2	8339000	8346999	14	27	0.660873	1.51315	1	2.16693e-05	1	4.32394e-05
chr2	8495000	8503499	8	29	0.370089	2.70205	1	1.65249e-11	1	1.46634e-10
chr2	8623000	8627499	3	19	0.246726	4.05308	1	2.13592e-12	1	2.42071e-11
chr2	8698000	8706499	10	20	0.646187	1.54754	1	0.000112251	1	0.000200556
chr2	8790000	8794999	6	17	0.479745	2.08444	1	3.73944e-06	1	8.62724e-06
chr2	8881500	8901499	51	40	1.5646	0.63914	0.000936054	1	0.00668645	1
chr2	8935000	8942999	7	25	0.379578	2.6345	1	4.29743e-10	1	2.51838e-09
chr2	9081000	9083999	5	16	0.435399	2.29675	1	1.34906e-06	1	3.41504e-06
chr2	9195500	9217999	46	40	1.41416	0.707133	0.00946793	0.292653	0.0469723	0.366034
chr2	9688500	9696499	8	31	0.346958	2.88219	1	6.89772e-13	1	8.7285e-12
chr2	9829000	9834499	11	30	0.477534	2.09409	1	6.4403e-09	1	2.81183e-08
chr2	10206500	10231499	55	42	1.60659	0.622437	0.000345761	1	0.00292995	1
chr2	10348500	10364499	13	43	0.392519	2.54765	1	1.30374e-14	1	2.89764e-13
chr2	10371500	10398499	73	68	1.32302	0.755845	0.00876514	0.114396	0.0439664	0.15157
chr2	10576500	10582999	9	25	0.474473	2.1076	1	6.31336e-08	1	2.12775e-07
chr2	10769000	10773999	7	19	0.493452	2.02654	1	2.30198e-06	1	5.53129e-06
chr2	11044500	11049999	10	22	0.589997	1.69492	1	1.39527e-05	1	2.89419e-05
chr2	11093500	11108999	23	44	0.657936	1.5199	1	1.66451e-07	1	5.12238e-07
chr2	11128000	11146999	40	31	1.58059	0.632676	0.00222455	1	0.013597	1
chr2	11208500	11213499	8	20	0.528698	1.89144	1	4.71976e-06	1	1.05536e-05
chr2	11467000	11472499	4	21	0.28037	3.56671	1	7.01171e-12	1	6.74607e-11
chr2	11696000	11723499	72	51	1.73183	0.577425	5.47446e-06	1	9.93927e-05	1
chr2	11780000	11789499	9	27	0.440582	2.26972	1	4.33863e-09	1	1.94686e-08
chr2	11826500	11842499	42	27	1.8945	0.527843	4.28273e-05	1	0.000531984	1
chr2	11979500	11987499	12	28	0.553006	1.8083	1	4.44645e-07	1	1.23479e-06
chr2	12225500	12234499	14	28	0.638084	1.56719	1	8.31492e-06	1	1.77444e-05
chr2	12314500	12322499	10	31	0.42406	2.35816	1	1.83053e-10	1	1.20805e-09
chr2	13165500	13180999	36	25	1.75555	0.569622	0.000535356	1	0.00420913	1
chr2	13552500	13559499	9	23	0.514012	1.94548	1	7.93376e-07	1	2.1049e-06
chr2	13770500	13781999	31	13	2.81973	0.354644	7.86922e-08	1	3.43343e-06	1
chr2	15077500	15094499	46	26	2.14743	0.465673	7.91234e-07	1	2.09452e-05	1
chr2	15139500	15147999	13	37	0.454495	2.20024	1	5.07081e-11	1	3.88176e-10
chr2	15637000	15643499	9	23	0.514012	1.94548	1	7.93376e-07	1	2.1049e-06
chr2	15745000	15755499	20	38	0.664262	1.50543	1	1.13407e-06	1	2.90927e-06
chr2	15769000	15772499	4	16	0.362832	2.75609	1	6.46891e-08	1	2.15756e-07
chr2	15786000	15789499	4	15	0.385509	2.59397	1	3.43429e-07	1	9.75218e-07
chr2	16057000	16071499	37	19	2.3439	0.42664	8.59287e-07	1	2.22314e-05	1
chr2	16193000	16202499	19	39	0.616815	1.62123	1	1.26857e-07	1	4.0282e-07
chr2	16708000	16712999	4	18	0.324639	3.08034	1	1.94726e-09	1	9.78237e-09
chr2	17707000	17731999	46	30	1.87034	0.534662	2.90724e-05	1	0.000389939	1
chr2	17842000	17855499	22	41	0.675559	1.48026	1	7.71579e-07	1	2.05879e-06
chr2	17968500	17980999	36	22	1.98453	0.503896	4.7805e-05	1	0.000580745	1
chr2	18117000	18124499	11	28	0.510467	1.95899	1	7.72346e-08	1	2.53413e-07
chr2	18176000	18188499	36	19	2.28222	0.438171	2.15477e-06	1	4.76988e-05	1
chr2	18285000	18293499	14	25	0.711709	1.40507	1	0.000133008	1	0.00023581
chr2	18621500	18627499	9	21	0.560741	1.78336	1	8.51554e-06	1	1.80793e-05
chr2	18995000	19001499	17	22	0.965449	1.03579	1	0.0142114	1	0.0203285
chr2	19361000	19380999	45	35	1.5763	0.634395	0.00142907	1	0.00942541	1
chr2	20061500	20073999	17	31	0.693917	1.4411	1	1.90701e-05	1	3.84468e-05
chr2	20395500	20405999	13	30	0.557123	1.79494	1	2.42334e-07	1	7.14233e-07
chr2	20481500	20484499	1	17	0.13707	7.29554	1	1.65645e-18	1	1.13103e-16
chr2	20543500	20557999	36	19	2.28222	0.438171	2.15477e-06	1	4.76988e-05	1
chr2	21026000	21037999	10	42	0.31558	3.16877	1	7.33494e-18	1	4.02825e-16
chr2	21464500	21483999	45	33	1.66903	0.599151	0.000448022	1	0.0036099	1
chr2	21684500	21687499	1	20	0.117489	8.51147	1	1.09902e-22	1	3.08433e-20
chr2	21727000	21731999	4	24	0.246726	4.05308	1	1.7005e-14	1	3.54175e-13
chr2	21810000	21828999	41	22	2.25272	0.443909	7.71579e-07	1	2.06061e-05	1
chr2	22024000	22031999	15	22	0.858177	1.16526	1	0.00356092	1	0.00534971
chr2	22556500	22560999	2	19	0.185044	5.40411	1	1.38498e-15	1	3.84774e-14
chr2	22780500	22784499	4	20	0.293721	3.40459	1	4.79237e-11	1	3.72195e-10
chr2	22849000	22850999	1	16	0.145133	6.89024	1	3.68727e-17	1	1.60036e-15
chr2	22952500	22962999	14	33	0.544248	1.8374	1	4.33373e-08	1	1.55069e-07
chr2	23109500	23117999	10	22	0.589997	1.69492	1	1.39527e-05	1	2.89419e-05
chr2	23273500	23281999	11	28	0.510467	1.95899	1	7.72346e-08	1	2.53413e-07
chr2	23285000	23295999	14	35	0.514012	1.94548	1	4.32263e-09	1	1.95237e-08
chr2	23316000	23321499	4	23	0.257006	3.89096	1	1.31851e-13	1	2.12682e-12
chr2	23512000	23517499	15	28	0.680623	1.46924	1	2.85048e-05	1	5.56846e-05
chr2	23600000	23603999	10	18	0.714207	1.40015	1	0.000757466	1	0.00122005
chr2	23633000	23638499	10	21	0.616815	1.62123	1	4.04198e-05	1	7.75248e-05
chr2	23703000	23723999	46	40	1.41416	0.707133	0.00946793	0.292653	0.0469723	0.366034
chr2	23768500	23776999	10	23	0.565414	1.76862	1	4.62459e-06	1	1.04246e-05
chr2	23886500	23893999	9	23	0.514012	1.94548	1	7.93376e-07	1	2.1049e-06
chr2	24101000	24117999	38	32	1.45793	0.685906	0.00991312	0.369638	0.0475015	0.453822
chr2	24207500	24218499	17	27	0.793048	1.26096	1	0.000501511	1	0.000822833
chr2	24349000	24353999	5	21	0.336444	2.97226	1	4.40219e-10	1	2.53579e-09
chr2	24863500	24879999	37	24	1.87512	0.5333	0.000127642	1	0.00128208	1
chr2	24926500	24929999	4	19	0.308407	3.24246	1	3.12892e-10	1	1.92741e-09
chr2	24938000	24958499	53	35	1.85044	0.540411	1.19643e-05	1	0.000191128	1
chr2	24991500	25000999	9	33	0.362832	2.75609	1	6.39868e-13	1	8.2676e-12
chr2	25055000	25059499	11	20	0.704931	1.41858	1	0.000390465	1	0.000650173
chr2	25333000	25339499	9	28	0.42539	2.35079	1	1.07981e-09	1	5.76108e-09
chr2	25443000	25448999	8	21	0.504667	1.98151	1	1.36782e-06	1	3.42794e-06
chr2	25466500	25475499	19	26	0.9138	1.09433	1	0.00464957	1	0.00690317
chr2	25479500	25486999	16	25	0.806604	1.23977	1	0.000935466	1	0.00149318
chr2	25607500	25614999	7	23	0.41121	2.43185	1	8.85773e-09	1	3.73815e-08
chr2	25709000	25721999	30	20	1.82107	0.549127	0.00069872	1	0.00519273	1
chr2	26241000	26246999	12	29	0.534573	1.87065	1	1.4209e-07	1	4.44037e-07
chr2	26401500	26408999	8	28	0.382851	2.61198	1	7.71067e-11	1	5.59848e-10
chr2	26465500	26473999	14	31	0.578264	1.72931	1	3.88268e-07	1	1.08423e-06
chr2	26642500	26653499	35	15	2.77567	0.360274	2.37611e-08	1	1.29847e-06	1
chr2	27264000	27276999	34	26	1.59915	0.625332	0.00337855	1	0.0195362	1
chr2	27356000	27361999	6	24	0.345416	2.89506	1	9.1277e-11	1	6.3892e-10
chr2	27571500	27578999	8	28	0.382851	2.61198	1	7.71067e-11	1	5.59848e-10
chr2	27606500	27620999	39	18	2.59712	0.385043	3.18497e-08	1	1.65319e-06	1
chr2	27660000	27665499	8	23	0.462611	2.16164	1	1.01189e-07	1	3.25495e-07
chr2	27967500	27979499	33	18	2.20755	0.452991	1.0015e-05	1	0.000163944	1
chr2	28145500	28154499	21	28	0.935857	1.06854	1	0.0050728	1	0.00750798
chr2	28524500	28535499	33	22	1.82363	0.548358	0.00042183	1	0.00344836	1
chr2	28646500	28675499	54	60	1.11229	0.899047	0.198193	0.00792663	0.662362	0.0115552
chr2	29309000	29313499	9	23	0.514012	1.94548	1	7.93376e-07	1	2.1049e-06
chr2	29384500	29399999	45	27	2.02668	0.493418	4.65991e-06	1	8.76307e-05	1
chr2	29438500	29460499	52	42	1.52052	0.65767	0.00157058	1	0.0101903	1
chr2	29488500	29493999	4	22	0.26818	3.72883	1	9.81912e-13	1	1.20344e-11
chr2	29556000	29557499	0	12	0.0948946	10.538	1	4.94387e-12	1	4.95074e-11
chr2	29759000	29769499	8	32	0.336444	2.97226	1	1.34603e-13	1	2.11557e-12
chr2	30046000	30052999	10	25	0.52192	1.916	1	4.5237e-07	1	1.24933e-06
chr2	30481000	30481999	1	13	0.176233	5.67431	1	2.85101e-13	1	4.01933e-12
chr2	30728500	30735999	12	30	0.517329	1.93301	1	4.39877e-08	1	1.56701e-07
chr2	31510500	31516499	14	28	0.638084	1.56719	1	8.31492e-06	1	1.77444e-05
chr2	31643000	31669499	45	48	1.1581	0.863482	0.145776	0.0274112	0.503391	0.0382887
chr2	32038500	32052499	37	27	1.67421	0.597296	0.00111159	1	0.00758058	1
chr2	33209000	33211999	2	17	0.205605	4.8637	1	2.0199e-13	1	3.0925e-12
chr2	33419500	33425999	8	26	0.41121	2.43185	1	1.51776e-09	1	7.80953e-09
chr2	34262000	34268999	8	24	0.444107	2.25171	1	2.5914e-08	1	9.67278e-08
chr2	35928500	35933499	12	18	0.844062	1.18475	1	0.00545338	1	0.00804608
chr2	36077000	36084499	10	25	0.52192	1.916	1	4.5237e-07	1	1.24933e-06
chr2	36124000	36128999	4	20	0.293721	3.40459	1	4.79237e-11	1	3.72195e-10
chr2	36228500	36250999	47	52	1.11725	0.895055	0.202597	0.0128418	0.675242	0.018445
chr2	36273500	36282499	9	32	0.373827	2.67503	1	3.00472e-12	1	3.21812e-11
chr2	36682000	36693999	32	18	2.14262	0.466718	2.37991e-05	1	0.000330454	1
chr2	36721500	36743499	40	23	2.10745	0.474507	5.2455e-06	1	9.73165e-05	1
chr2	36777500	36789499	41	17	2.87847	0.347407	7.62676e-10	1	7.77131e-08	1
chr2	37575500	37582999	17	28	0.765701	1.30599	1	0.000232066	1	0.00039813
chr2	37639000	37649999	23	30	0.955068	1.04705	1	0.00541905	1	0.0080047
chr2	37661000	37665999	11	16	0.870797	1.14837	1	0.0102253	1	0.0147663
chr2	37794000	37803499	11	30	0.477534	2.09409	1	6.4403e-09	1	2.81183e-08
chr2	38192000	38192999	3	13	0.352466	2.83716	1	3.03679e-07	1	8.72669e-07
chr2	38198500	38203999	14	28	0.638084	1.56719	1	8.31492e-06	1	1.77444e-05
chr2	38275000	38279499	5	17	0.41121	2.43185	1	2.99402e-07	1	8.66999e-07
chr2	38441000	38446999	13	23	0.719617	1.38963	1	0.000255186	1	0.00043601
chr2	38450500	38453999	6	18	0.454495	2.20024	1	9.41891e-07	1	2.4466e-06
chr2	38470000	38473499	7	18	0.519423	1.92521	1	8.25769e-06	1	1.77319e-05
chr2	38739500	38751999	30	35	1.06229	0.941361	0.335135	0.0156948	1	0.0223452
chr2	38803500	38806999	5	17	0.41121	2.43185	1	2.99402e-07	1	8.66999e-07
chr2	38917000	38933499	41	31	1.61914	0.617612	0.0012926	1	0.00866337	1
chr2	38944000	38947999	4	18	0.324639	3.08034	1	1.94726e-09	1	9.78237e-09
chr2	39119000	39123999	8	22	0.482725	2.07157	1	3.79773e-07	1	1.06771e-06
chr2	39258500	39278999	46	36	1.56704	0.638145	0.0014565	1	0.00958151	1
chr2	39408000	39413999	9	32	0.373827	2.67503	1	3.00472e-12	1	3.21812e-11
chr2	39483500	39492999	20	32	0.785037	1.27383	1	0.000165059	1	0.000288357
chr2	39641000	39647499	14	23	0.771019	1.29699	1	0.000708229	1	0.00114386
chr2	39653000	39656999	5	20	0.352466	2.83716	1	2.41225e-09	1	1.13231e-08
chr2	41792000	41806999	34	25	1.66066	0.602172	0.00183848	1	0.0116078	1
chr2	41888000	41903999	43	25	2.08768	0.479	3.35441e-06	1	6.82758e-05	1
chr2	42021000	42026999	24	12	2.37236	0.42152	3.04122e-05	1	0.000401247	1
chr2	42152500	42153999	1	16	0.145133	6.89024	1	3.68727e-17	1	1.60036e-15
chr2	42181500	42187499	5	20	0.352466	2.83716	1	2.41225e-09	1	1.13231e-08
chr2	42229500	42234499	3	21	0.224296	4.45839	1	2.70384e-14	1	4.93336e-13
chr2	42256000	42272499	33	24	1.67774	0.596041	0.00175592	1	0.0111632	1
chr2	42782500	42813999	78	60	1.59765	0.625919	3.90179e-05	1	0.000491673	1
chr2	42947000	42948499	1	15	0.154204	6.48493	1	7.75418e-16	1	2.4294e-14
chr2	43218000	43221499	6	19	0.43177	2.31605	1	2.25762e-07	1	6.81091e-07
chr2	43263500	43270499	10	29	0.452331	2.21077	1	2.82071e-09	1	1.30116e-08
chr2	43308000	43315499	11	22	0.643633	1.55368	1	5.8352e-05	1	0.000108628
chr2	43340000	43348999	14	34	0.528698	1.89144	1	1.38755e-08	1	5.39828e-08
chr2	43605000	43612999	9	26	0.4569	2.18866	1	1.68458e-08	1	6.50877e-08
chr2	43751000	43752499	2	14	0.246726	4.05308	1	2.36139e-10	1	1.5208e-09
chr2	43816500	43829999	37	29	1.5626	0.63996	0.00362379	1	0.0207049	1
chr2	43889500	43893499	7	19	0.493452	2.02654	1	2.30198e-06	1	5.53129e-06
chr2	44021000	44027999	15	28	0.680623	1.46924	1	2.85048e-05	1	5.56846e-05
chr2	44050500	44064499	35	23	1.85044	0.540411	0.000232363	1	0.00211515	1
chr2	44109000	44118499	12	32	0.485975	2.05772	1	3.84693e-09	1	1.75138e-08
chr2	44697500	44704999	8	27	0.396524	2.52192	1	3.48023e-10	1	2.09434e-09
chr2	44743000	44753999	15	39	0.493452	2.02654	1	2.26436e-10	1	1.47669e-09
chr2	45279000	45286499	13	29	0.575694	1.73703	1	7.23724e-07	1	1.93734e-06
chr2	45314000	45320499	10	32	0.41121	2.43185	1	4.45521e-11	1	3.51115e-10
chr2	45331500	45346499	35	44	0.986904	1.01327	1	0.00238477	1	0.003637
chr2	45649500	45655999	12	23	0.668216	1.49652	1	7.99179e-05	1	0.000145792
chr2	45906000	45912999	9	24	0.493452	2.02654	1	2.28095e-07	1	6.79646e-07
chr2	45916500	45926499	14	33	0.544248	1.8374	1	4.33373e-08	1	1.55069e-07
chr2	45966500	45972999	9	23	0.514012	1.94548	1	7.93376e-07	1	2.1049e-06
chr2	46099000	46103499	4	17	0.342675	2.91822	1	1.15242e-08	1	4.64503e-08
chr2	46127000	46131499	6	17	0.479745	2.08444	1	3.73944e-06	1	8.62724e-06
chr2	46457000	46467999	32	13	2.90784	0.343898	2.48029e-08	1	1.33124e-06	1
chr2	46496000	46497999	2	18	0.194784	5.1339	1	1.71564e-14	1	3.44335e-13
chr2	46525500	46540499	44	21	2.52333	0.396301	1.32886e-08	1	7.85829e-07	1
chr2	46658000	46663499	7	22	0.429089	2.33052	1	3.79105e-08	1	1.38708e-07
chr2	46740000	46753499	32	17	2.26165	0.442154	7.81124e-06	1	0.000134308	1
chr2	46772500	46776999	3	18	0.259712	3.85043	1	1.76798e-11	1	1.51132e-10
chr2	46956000	46964499	15	28	0.680623	1.46924	1	2.85048e-05	1	5.56846e-05
chr2	47305000	47311999	15	31	0.616815	1.62123	1	1.62832e-06	1	4.00948e-06
chr2	47643000	47645999	7	16	0.580532	1.72256	1	9.14606e-05	1	0.000165436
chr2	47771500	47785999	42	23	2.21025	0.452437	9.76612e-07	1	2.48972e-05	1
chr2	48113000	48114999	3	14	0.328968	3.03981	1	4.86655e-08	1	1.71886e-07
chr2	48296000	48307499	18	32	0.710272	1.40791	1	2.37991e-05	1	4.71766e-05
chr2	48670500	48675999	28	9	3.57753	0.279523	1.07981e-09	1	1.0611e-07	1
chr2	48786000	48795999	32	19	2.03549	0.491282	6.55653e-05	1	0.000752603	1
chr2	48856000	48860999	7	21	0.448593	2.22919	1	1.55672e-07	1	4.82157e-07
chr2	48939000	48957999	43	32	1.64484	0.607962	0.000763448	1	0.00559592	1
chr2	49253000	49275999	56	36	1.90046	0.526189	3.36688e-06	1	6.81526e-05	1
chr2	49702500	49705499	3	18	0.259712	3.85043	1	1.76798e-11	1	1.51132e-10
chr2	50118000	50123499	11	20	0.704931	1.41858	1	0.000390465	1	0.000650173
chr2	50622500	50629999	27	6	4.93452	0.202654	5.22154e-13	1	2.88194e-10	1
chr2	51880500	51900999	48	29	2.01493	0.496296	2.92252e-06	1	6.08311e-05	1
chr2	52652000	52653499	1	12	0.189789	5.269	1	4.94387e-12	1	4.95074e-11
chr2	52740500	52758499	43	17	3.01554	0.331616	7.50354e-11	1	1.23013e-08	1
chr2	52995500	53006999	35	16	2.61239	0.382791	1.1136e-07	1	4.56976e-06	1
chr2	53019000	53023999	5	22	0.321816	3.10736	1	7.69089e-11	1	5.68127e-10
chr2	53334000	53341499	10	24	0.542797	1.84231	1	1.47395e-06	1	3.65464e-06
chr2	53503500	53511999	12	23	0.668216	1.49652	1	7.99179e-05	1	0.000145792
chr2	53601500	53606499	12	25	0.616815	1.62123	1	1.11497e-05	1	2.34315e-05
chr2	53659500	53665999	11	28	0.510467	1.95899	1	7.72346e-08	1	2.53413e-07
chr2	53676000	53688999	13	53	0.31983	3.12666	1	2.40431e-21	1	4.32723e-19
chr2	53706000	53711999	4	16	0.362832	2.75609	1	6.46891e-08	1	2.15756e-07
chr2	53773000	53790499	44	36	1.50036	0.666506	0.00392357	0.433758	0.0217643	0.524974
chr2	53855000	53860999	11	27	0.528698	1.89144	1	2.54724e-07	1	7.45971e-07
chr2	54296000	54305499	8	31	0.346958	2.88219	1	6.89772e-13	1	8.7285e-12
chr2	54340000	54342999	6	17	0.479745	2.08444	1	3.73944e-06	1	8.62724e-06
chr2	54582500	54596999	41	28	1.78664	0.559711	0.00018244	1	0.00173961	1
chr2	54717500	54738999	46	37	1.52581	0.655392	0.00243951	1	0.0146088	1
chr2	54834000	54844499	30	22	1.66272	0.601425	0.00291926	1	0.0170954	1
chr2	54912000	54915499	3	20	0.234977	4.25573	1	2.45907e-13	1	3.58742e-12
chr2	55417500	55420999	7	18	0.519423	1.92521	1	8.25769e-06	1	1.77319e-05
chr2	55768000	55777999	8	26	0.41121	2.43185	1	1.51776e-09	1	7.80953e-09
chr2	55963500	55981499	40	44	1.12397	0.8897	0.206305	0.0209871	0.686289	0.0296949
chr2	56027000	56034999	28	19	1.78876	0.559046	0.00127011	1	0.00853683	1
chr2	56112000	56124499	31	19	1.97381	0.506635	0.000143756	1	0.00141643	1
chr2	56471000	56490499	39	33	1.45133	0.689024	0.00989151	0.358815	0.0476808	0.441696
chr2	58441500	58450499	4	33	0.181416	5.51219	1	3.41589e-23	1	1.10903e-20
chr2	58520500	58524999	7	19	0.493452	2.02654	1	2.30198e-06	1	5.53129e-06
chr2	58590500	58614999	66	48	1.6868	0.592839	2.70645e-05	1	0.000365675	1
chr2	58629500	58638499	16	28	0.723162	1.38282	1	8.60106e-05	1	0.000156287
chr2	58909500	58918499	6	28	0.297773	3.35827	1	8.70002e-14	1	1.47295e-12
chr2	59594500	59598999	12	22	0.697269	1.43417	1	0.000202061	1	0.000349698
chr2	59859000	59863999	1	22	0.107272	9.32208	1	1.42269e-25	1	8.41316e-23
chr2	60201500	60208999	11	23	0.616815	1.62123	1	2.12173e-05	1	4.25555e-05
chr2	60223500	60227499	5	14	0.493452	2.02654	1	2.31316e-05	1	4.59772e-05
chr2	60381000	60385499	4	18	0.324639	3.08034	1	1.94726e-09	1	9.78237e-09
chr2	60471500	60487499	44	32	1.68222	0.594452	0.00042895	1	0.00347313	1
chr2	60507500	60525999	54	48	1.38469	0.722185	0.0086416	0.233634	0.0434257	0.296824
chr2	60639500	60641999	6	15	0.539713	1.85284	1	5.02811e-05	1	9.45708e-05
chr2	60853000	60868499	38	41	1.14551	0.872971	0.179084	0.0315897	0.603988	0.0439751
chr2	60943000	60948499	10	18	0.714207	1.40015	1	0.000757466	1	0.00122005
chr2	60984000	60993999	16	29	0.699057	1.4305	1	3.63692e-05	1	7.01622e-05
chr2	61922500	61924999	1	17	0.13707	7.29554	1	1.65645e-18	1	1.13103e-16
chr2	61996000	62009999	15	41	0.469954	2.12787	1	1.90797e-11	1	1.58476e-10
chr2	62159000	62185499	45	72	0.777356	1.28641	1	6.69106e-08	1	2.21648e-07
chr2	62223000	62227999	16	21	0.953259	1.04903	1	0.0137549	1	0.0196968
chr2	62655000	62660999	13	21	0.785037	1.27383	1	0.00134445	1	0.00210271
chr2	62928000	62942999	34	24	1.72708	0.579011	0.000947512	1	0.00674502	1
chr2	63055500	63060999	4	23	0.257006	3.89096	1	1.31851e-13	1	2.12682e-12
chr2	63117000	63118499	3	18	0.259712	3.85043	1	1.76798e-11	1	1.51132e-10
chr2	63204500	63224499	42	32	1.60746	0.622101	0.00133084	1	0.0088837	1
chr2	64396000	64404999	7	36	0.266731	3.7491	1	2.29948e-18	1	1.4207e-16
chr2	64752500	64759499	7	23	0.41121	2.43185	1	8.85773e-09	1	3.73815e-08
chr2	64769500	64786499	46	36	1.56704	0.638145	0.0014565	1	0.00958151	1
chr2	64845000	64860499	9	50	0.241888	4.13414	1	5.27618e-26	1	3.97104e-23
chr2	64992000	64998999	11	30	0.477534	2.09409	1	6.4403e-09	1	2.81183e-08
chr2	65051500	65070499	49	28	2.12695	0.470157	5.11788e-07	1	1.4828e-05	1
chr2	65181500	65189499	5	23	0.308407	3.24246	1	1.28861e-11	1	1.17981e-10
chr2	65372000	65379499	16	24	0.838868	1.19208	1	0.00193546	1	0.00297437
chr2	65442000	65447499	4	21	0.28037	3.56671	1	7.01171e-12	1	6.74607e-11
chr2	65473500	65481499	14	36	0.50012	1.99952	1	1.31118e-09	1	6.8358e-09
chr2	65662500	65666499	4	14	0.41121	2.43185	1	1.71887e-06	1	4.21116e-06
chr2	65730000	65732999	6	16	0.507965	1.96864	1	1.40929e-05	1	2.90453e-05
chr2	65855000	65864499	17	27	0.793048	1.26096	1	0.000501511	1	0.000822833
chr2	65929500	65943999	37	19	2.3439	0.42664	8.59287e-07	1	2.22314e-05	1
chr2	66119000	66123999	6	25	0.332131	3.01086	1	1.69342e-11	1	1.48045e-10
chr2	66222000	66236999	37	30	1.51219	0.661292	0.00611883	0.451125	0.0318152	0.544104
chr2	66260000	66264999	10	18	0.714207	1.40015	1	0.000757466	1	0.00122005
chr2	66964000	66969999	6	21	0.392519	2.54765	1	1.1276e-08	1	4.61407e-08
chr2	67004000	67012499	13	36	0.466779	2.14234	1	1.84592e-10	1	1.21241e-09
chr2	67153500	67164499	30	16	2.24956	0.444531	1.49079e-05	1	0.000230051	1
chr2	67243500	67247999	4	24	0.246726	4.05308	1	1.7005e-14	1	3.54175e-13
chr2	67277000	67282499	7	23	0.41121	2.43185	1	8.85773e-09	1	3.73815e-08
chr2	67881000	67887499	21	25	1.04384	0.958001	0.378892	0.0255997	1	0.0358082
chr2	67998500	68009999	13	34	0.493452	2.02654	1	2.26057e-09	1	1.09558e-08
chr2	68292000	68297499	8	24	0.444107	2.25171	1	2.5914e-08	1	9.67278e-08
chr2	68348000	68362499	33	18	2.20755	0.452991	1.0015e-05	1	0.000163944	1
chr2	68726000	68751999	56	73	0.950228	1.05238	1	5.97073e-05	1	0.000110846
chr2	68795000	68811499	38	20	2.29103	0.436486	1.13407e-06	1	2.82799e-05	1
chr2	68924500	68927999	6	18	0.454495	2.20024	1	9.41891e-07	1	2.4466e-06
chr2	69006500	69019999	40	22	2.19908	0.454736	1.84633e-06	1	4.19364e-05	1
chr2	69034000	69047999	45	18	2.98668	0.33482	4.26888e-11	1	7.68306e-09	1
chr2	69098500	69102999	4	18	0.324639	3.08034	1	1.94726e-09	1	9.78237e-09
chr2	69451500	69455499	4	24	0.246726	4.05308	1	1.7005e-14	1	3.54175e-13
chr2	69531500	69538499	16	28	0.723162	1.38282	1	8.60106e-05	1	0.000156287
chr2	69648000	69652499	7	20	0.469954	2.12787	1	6.12245e-07	1	1.66203e-06
chr2	69742500	69743499	3	13	0.352466	2.83716	1	3.03679e-07	1	8.72669e-07
chr2	70146500	70152499	7	24	0.394762	2.53317	1	1.9888e-09	1	9.80806e-09
chr2	70185500	70190999	7	19	0.493452	2.02654	1	2.30198e-06	1	5.53129e-06
chr2	70199000	70201499	6	19	0.43177	2.31605	1	2.25762e-07	1	6.81091e-07
chr2	70215000	70221999	5	22	0.321816	3.10736	1	7.69089e-11	1	5.68127e-10
chr2	70374500	70390999	38	28	1.65902	0.602766	0.00116102	1	0.00787716	1
chr2	70488500	70500499	32	23	1.69624	0.589539	0.00166819	1	0.0106566	1
chr2	70708000	70710999	4	15	0.385509	2.59397	1	3.43429e-07	1	9.75218e-07
chr2	70903500	70908499	6	20	0.41121	2.43185	1	5.16103e-08	1	1.79719e-07
chr2	70984000	70988499	7	19	0.493452	2.02654	1	2.30198e-06	1	5.53129e-06
chr2	71064000	71071499	6	27	0.308407	3.24246	1	5.22154e-13	1	6.94723e-12
chr2	71149500	71157499	12	23	0.668216	1.49652	1	7.99179e-05	1	0.000145792
chr2	71177000	71178999	6	15	0.539713	1.85284	1	5.02811e-05	1	9.45708e-05
chr2	71469500	71475999	5	22	0.321816	3.10736	1	7.69089e-11	1	5.68127e-10
chr2	71512500	71517499	12	24	0.641487	1.55888	1	3.04122e-05	1	5.91073e-05
chr2	71797000	71801499	10	21	0.616815	1.62123	1	4.04198e-05	1	7.75248e-05
chr2	71841500	71849999	9	23	0.514012	1.94548	1	7.93376e-07	1	2.1049e-06
chr2	71891500	71898499	16	25	0.806604	1.23977	1	0.000935466	1	0.00149318
chr2	72056500	72063499	8	24	0.444107	2.25171	1	2.5914e-08	1	9.67278e-08
chr2	72074500	72079499	7	26	0.36552	2.73583	1	8.94897e-11	1	6.34863e-10
chr2	72591000	72594499	9	18	0.649279	1.54017	1	0.000216586	1	0.000373003
chr2	72776000	72790499	39	21	2.24296	0.445839	1.46208e-06	1	3.49086e-05	1
chr2	73314000	73331499	47	35	1.64484	0.607962	0.000483797	1	0.00386617	1
chr2	73599000	73614499	47	24	2.36857	0.422196	3.51918e-08	1	1.80125e-06	1
chr2	73737000	73743999	12	23	0.668216	1.49652	1	7.99179e-05	1	0.000145792
chr2	73777000	73782999	6	23	0.359809	2.77925	1	4.73408e-10	1	2.67852e-09
chr2	73847500	73853499	9	23	0.514012	1.94548	1	7.93376e-07	1	2.1049e-06
chr2	73885000	73893499	16	23	0.873821	1.1444	1	0.00386299	1	0.00578174
chr2	73961500	73974999	43	27	1.93856	0.515847	2.08839e-05	1	0.00029926	1
chr2	74222500	74234999	21	43	0.616815	1.62123	1	3.55704e-08	1	1.31394e-07
chr2	74348000	74362999	24	47	0.642515	1.55638	1	3.51918e-08	1	1.30112e-07
chr2	74472500	74475499	8	17	0.616815	1.62123	1	0.000147131	1	0.000259515
chr2	74498500	74505999	20	30	0.835685	1.19662	1	0.00069872	1	0.00113027
chr2	74738000	74745499	30	15	2.39016	0.418382	4.35973e-06	1	8.28799e-05	1
chr2	74983500	74992499	20	28	0.893318	1.11942	1	0.00262929	1	0.00399027
chr2	75472000	75496999	43	62	0.861583	1.16065	1	1.15274e-05	1	2.40892e-05
chr2	75504000	75523499	37	23	1.95325	0.511968	5.48736e-05	1	0.00065226	1
chr2	75839000	75840999	1	12	0.189789	5.269	1	4.94387e-12	1	4.95074e-11
chr2	77195500	77206999	10	30	0.43774	2.28446	1	7.29802e-10	1	4.03004e-09
chr2	77259000	77274999	34	26	1.59915	0.625332	0.00337855	1	0.0195362	1
chr2	78559000	78567999	10	35	0.376942	2.65293	1	5.406e-13	1	7.07609e-12
chr2	78977500	78981999	8	20	0.528698	1.89144	1	4.71976e-06	1	1.05536e-05
chr2	80247000	80248499	1	13	0.176233	5.67431	1	2.85101e-13	1	4.01933e-12
chr2	80372000	80384999	36	19	2.28222	0.438171	2.15477e-06	1	4.76988e-05	1
chr2	80388000	80390499	5	16	0.435399	2.29675	1	1.34906e-06	1	3.41504e-06
chr2	80896500	80900999	9	24	0.493452	2.02654	1	2.28095e-07	1	6.79646e-07
chr2	81109000	81114999	3	23	0.205605	4.8637	1	2.87001e-16	1	9.78819e-15
chr2	84111500	84117499	7	25	0.379578	2.6345	1	4.29743e-10	1	2.51838e-09
chr2	84231000	84238499	14	26	0.68535	1.45911	1	5.46181e-05	1	0.000102356
chr2	84309500	84316999	8	29	0.370089	2.70205	1	1.65249e-11	1	1.46634e-10
chr2	84679000	84681499	3	17	0.27414	3.64777	1	1.39124e-10	1	9.34529e-10
chr2	84721000	84731999	16	37	0.551887	1.81197	1	1.29815e-08	1	5.09538e-08
chr2	84788000	84792499	7	20	0.469954	2.12787	1	6.12245e-07	1	1.66203e-06
chr2	84876000	84888499	33	20	1.99731	0.500675	7.68968e-05	1	0.000856259	1
chr2	85005000	85015999	14	31	0.578264	1.72931	1	3.88268e-07	1	1.08423e-06
chr2	85087500	85098999	10	31	0.42406	2.35816	1	1.83053e-10	1	1.20805e-09
chr2	85106000	85115999	9	30	0.397945	2.51291	1	6.0621e-11	1	4.59809e-10
chr2	85170500	85182999	13	41	0.41121	2.43185	1	2.25252e-13	1	3.37531e-12
chr2	85200500	85225999	62	55	1.38783	0.720548	0.0053581	0.226555	0.0290264	0.288528
chr2	85226500	85236999	17	36	0.600144	1.66627	1	1.66537e-07	1	5.11505e-07
chr2	85243500	85247499	5	24	0.296071	3.37757	1	2.07405e-12	1	2.42187e-11
chr2	85252500	85269499	47	33	1.74159	0.574186	0.000135619	1	0.00134708	1
chr2	85274500	85278499	2	22	0.160908	6.21472	1	5.49715e-19	1	4.32407e-17
chr2	85312500	85318999	7	24	0.394762	2.53317	1	1.9888e-09	1	9.80806e-09
chr2	85723000	85736999	39	21	2.24296	0.445839	1.46208e-06	1	3.49086e-05	1
chr2	85740500	85746999	10	25	0.52192	1.916	1	4.5237e-07	1	1.24933e-06
chr2	85758000	85770499	16	49	0.419434	2.38416	1	4.54408e-15	1	1.09203e-13
chr2	85942500	85954499	38	31	1.50349	0.665121	0.00616549	0.438383	0.0319076	0.530242
chr2	86114500	86118999	5	20	0.352466	2.83716	1	2.41225e-09	1	1.13231e-08
chr2	88215000	88223499	15	27	0.704931	1.41858	1	6.94826e-05	1	0.00012836
chr2	88296000	88302999	10	23	0.565414	1.76862	1	4.62459e-06	1	1.04246e-05
chr2	88497000	88498499	5	15	0.462611	2.16164	1	5.7517e-06	1	1.27262e-05
chr2	88904000	88915999	12	36	0.433437	2.30714	1	2.08799e-11	1	1.72908e-10
chr2	89789000	89803999	36	54	0.829896	1.20497	1	1.30562e-05	1	2.72033e-05
chr2	89848000	89850999	11	21	0.672889	1.48613	1	0.000154137	1	0.000270734
chr2	94987500	94993999	9	27	0.440582	2.26972	1	4.33863e-09	1	1.94686e-08
chr2	95074000	95098499	48	55	1.07943	0.926418	0.273294	0.00581534	0.883139	0.00856144
chr2	95184000	95188499	11	18	0.779135	1.28348	1	0.00219543	1	0.00335954
chr2	96097000	96103499	13	20	0.82242	1.21592	1	0.00290395	1	0.0043932
chr2	96746000	96752499	15	29	0.657936	1.5199	1	1.13235e-05	1	2.37079e-05
chr2	97353000	97360499	16	24	0.838868	1.19208	1	0.00193546	1	0.00297437
chr2	98039000	98049999	9	37	0.324639	3.08034	1	9.96874e-16	1	2.88319e-14
chr2	98305500	98305999	0	10	0.112148	8.91678	1	1.18568e-09	1	6.22563e-09
chr2	98784000	98792499	19	27	0.881164	1.13486	1	0.00246936	1	0.00376221
chr2	98877500	98897499	46	31	1.81189	0.551909	6.23379e-05	1	0.000720553	1
chr2	99054500	99070499	40	27	1.80639	0.553591	0.000168669	1	0.00162185	1
chr2	99112000	99114499	6	17	0.479745	2.08444	1	3.73944e-06	1	8.62724e-06
chr2	99153000	99156999	10	20	0.646187	1.54754	1	0.000112251	1	0.000200556
chr2	99192500	99196999	8	16	0.653098	1.53116	1	0.00041937	1	0.000695785
chr2	99370500	99373499	3	15	0.308407	3.24246	1	7.32187e-09	1	3.14897e-08
chr2	99432500	99439499	11	19	0.740178	1.35103	1	0.000947043	1	0.001507
chr2	99580500	99586499	12	25	0.616815	1.62123	1	1.11497e-05	1	2.34315e-05
chr2	99671000	99682999	20	37	0.681743	1.46683	1	2.77343e-06	1	6.49539e-06
chr2	99787500	99794999	10	23	0.565414	1.76862	1	4.62459e-06	1	1.04246e-05
chr2	100425500	100431999	7	18	0.519423	1.92521	1	8.25769e-06	1	1.77319e-05
chr2	100768500	100771499	2	19	0.185044	5.40411	1	1.38498e-15	1	3.84774e-14
chr2	101229500	101234499	2	23	0.154204	6.48493	1	3.70276e-20	1	4.15663e-18
chr2	101358500	101367999	11	26	0.54828	1.82389	1	8.12067e-07	1	2.13703e-06
chr2	101401000	101404999	8	17	0.616815	1.62123	1	0.000147131	1	0.000259515
chr2	101438500	101443499	12	19	0.801859	1.2471	1	0.00255414	1	0.00388013
chr2	101555500	101567999	40	23	2.10745	0.474507	5.2455e-06	1	9.73165e-05	1
chr2	102420000	102425499	13	23	0.719617	1.38963	1	0.000255186	1	0.00043601
chr2	102521000	102525999	3	22	0.214544	4.66104	1	2.84503e-15	1	7.08391e-14
chr2	102672000	102686999	36	41	1.08677	0.920159	0.278958	0.0149322	0.900036	0.0213126
chr2	103794500	103803499	14	24	0.740178	1.35103	1	0.000312601	1	0.000526315
chr2	104664000	104672999	10	19	0.678496	1.47385	1	0.000298339	1	0.000504457
chr2	105064500	105072499	14	25	0.711709	1.40507	1	0.000133008	1	0.00023581
chr2	105134500	105155499	50	40	1.53452	0.651672	0.0015416	1	0.0100495	1
chr2	105169000	105173999	9	20	0.587443	1.70229	1	2.61943e-05	1	5.16771e-05
chr2	105222500	105238499	40	29	1.68596	0.593134	0.000673684	1	0.00503038	1
chr2	105308500	105313499	4	24	0.246726	4.05308	1	1.7005e-14	1	3.54175e-13
chr2	105339000	105341999	4	16	0.362832	2.75609	1	6.46891e-08	1	2.15756e-07
chr2	105390500	105391999	8	14	0.740178	1.35103	1	0.00289383	1	0.0043835
chr2	105402500	105408999	8	26	0.41121	2.43185	1	1.51776e-09	1	7.80953e-09
chr2	105445500	105460499	38	29	1.60372	0.623551	0.00211633	1	0.0130877	1
chr2	105562000	105565499	10	17	0.753885	1.32646	1	0.00183361	1	0.00282454
chr2	105669000	105689499	48	25	2.32492	0.430123	4.65332e-08	1	2.22366e-06	1
chr2	105814500	105819999	9	19	0.616815	1.62123	1	7.70822e-05	1	0.000141398
chr2	105984500	105987999	5	18	0.389567	2.56695	1	6.30488e-08	1	2.15095e-07
chr2	106099000	106115499	45	29	1.89157	0.528663	2.62424e-05	1	0.000356897	1
chr2	106290000	106292999	4	21	0.28037	3.56671	1	7.01171e-12	1	6.74607e-11
chr2	107538000	107542499	1	16	0.145133	6.89024	1	3.68727e-17	1	1.60036e-15
chr2	108094000	108100499	5	19	0.370089	2.70205	1	1.26298e-08	1	5.00179e-08
chr2	108248000	108260499	34	15	2.69857	0.370567	7.12729e-08	1	3.18956e-06	1
chr2	108299000	108307499	12	26	0.59397	1.68359	1	3.94302e-06	1	9.01838e-06
chr2	108348500	108358999	32	20	1.93856	0.515847	0.000165059	1	0.00159874	1
chr2	108772000	108777499	8	22	0.482725	2.07157	1	3.79773e-07	1	1.06771e-06
chr2	108909500	108928999	45	52	1.0707	0.933971	0.296509	0.00597968	0.951195	0.00879907
chr2	109079500	109091499	14	41	0.440582	2.26972	1	2.30752e-12	1	2.50133e-11
chr2	109255000	109260999	29	19	1.85044	0.540411	0.000633197	1	0.00480829	1
chr2	109288000	109294499	13	21	0.785037	1.27383	1	0.00134445	1	0.00210271
chr2	109335500	109344499	10	28	0.467929	2.13708	1	1.05589e-08	1	4.37743e-08
chr2	109456000	109462999	19	23	1.02802	0.972739	0.407004	0.0253966	1	0.0355587
chr2	109495500	109500499	9	19	0.616815	1.62123	1	7.70822e-05	1	0.000141398
chr2	109688000	109694499	8	21	0.504667	1.98151	1	1.36782e-06	1	3.42794e-06
chr2	110116500	110136499	47	33	1.74159	0.574186	0.000135619	1	0.00134708	1
chr2	110725000	110728999	4	19	0.308407	3.24246	1	3.12892e-10	1	1.92741e-09
chr2	111145500	111172999	54	68	0.983328	1.01695	1	0.00025787	1	0.000439576
chr2	112682000	112687999	4	22	0.26818	3.72883	1	9.81912e-13	1	1.20344e-11
chr2	112750000	112756499	13	20	0.82242	1.21592	1	0.00290395	1	0.0043932
chr2	113037500	113041499	6	20	0.41121	2.43185	1	5.16103e-08	1	1.79719e-07
chr2	113241500	113252499	32	18	2.14262	0.466718	2.37991e-05	1	0.000330454	1
chr2	113796000	113809499	33	26	1.55346	0.643724	0.00580766	1	0.0308909	1
chr2	114429500	114444499	34	19	2.15885	0.463209	1.25414e-05	1	0.000198433	1
chr2	114914500	114934499	37	25	1.803	0.554632	0.000278285	1	0.00245163	1
chr2	115542000	115546999	3	26	0.18276	5.47166	1	2.32535e-19	1	2.0426e-17
chr2	116440000	116449499	10	30	0.43774	2.28446	1	7.29802e-10	1	4.03004e-09
chr2	117017000	117024999	7	18	0.519423	1.92521	1	8.25769e-06	1	1.77319e-05
chr2	117056500	117075999	34	27	1.54204	0.648493	0.00590584	1	0.0312375	1
chr2	118116000	118122499	11	24	0.592142	1.68878	1	7.4206e-06	1	1.61342e-05
chr2	118273000	118287499	39	14	3.28968	0.303981	3.13852e-11	1	6.18662e-09	1
chr2	118571500	118588499	41	23	2.15885	0.463209	2.28902e-06	1	5.01344e-05	1
chr2	118657000	118675499	41	32	1.57007	0.636913	0.00227139	1	0.0138271	1
chr2	118909500	118916499	11	23	0.616815	1.62123	1	2.12173e-05	1	4.25555e-05
chr2	119191000	119206999	40	26	1.87329	0.53382	7.78558e-05	1	0.000857994	1
chr2	119223000	119224499	0	13	0.0881164	11.3486	1	2.85101e-13	1	4.01933e-12
chr2	119294000	119297999	13	17	0.95949	1.04222	1	0.0225443	1	0.0317977
chr2	119445500	119452999	9	26	0.4569	2.18866	1	1.68458e-08	1	6.50877e-08
chr2	119548000	119558999	19	38	0.632631	1.5807	1	3.34216e-07	1	9.54788e-07
chr2	119565000	119568999	7	18	0.519423	1.92521	1	8.25769e-06	1	1.77319e-05
chr2	120119500	120126499	7	26	0.36552	2.73583	1	8.94897e-11	1	6.34863e-10
chr2	120349500	120352499	4	13	0.440582	2.26972	1	8.08184e-06	1	1.74539e-05
chr2	120474000	120487499	41	24	2.0725	0.48251	6.27751e-06	1	0.000111407	1
chr2	120515000	120542999	82	53	1.89613	0.527389	3.96194e-08	1	1.95826e-06	1
chr2	120734000	120744499	14	35	0.514012	1.94548	1	4.32263e-09	1	1.95237e-08
chr2	120756000	120764999	19	27	0.881164	1.13486	1	0.00246936	1	0.00376221
chr2	120829500	120835499	7	22	0.429089	2.33052	1	3.79105e-08	1	1.38708e-07
chr2	120961000	120970499	18	34	0.669685	1.49324	1	4.09959e-06	1	9.33393e-06
chr2	121139000	121145999	10	27	0.48464	2.06339	1	3.82426e-08	1	1.38182e-07
chr2	121150000	121155499	15	23	0.82242	1.21592	1	0.00174264	1	0.00268965
chr2	121382500	121398999	37	26	1.73622	0.575964	0.000571649	1	0.00442514	1
chr2	122157000	122167999	16	31	0.655366	1.52587	1	5.9288e-06	1	1.30025e-05
chr2	122323500	122327999	8	19	0.555133	1.80137	1	1.55743e-05	1	3.18251e-05
chr2	122376000	122386999	16	32	0.635506	1.57355	1	2.28951e-06	1	5.5379e-06
chr2	122707500	122719999	31	9	3.94762	0.253317	1.37017e-11	1	3.33635e-09	1
chr2	125224500	125237999	36	16	2.68496	0.372445	3.8516e-08	1	1.92673e-06	1
chr2	126701000	126706999	7	18	0.519423	1.92521	1	8.25769e-06	1	1.77319e-05
chr2	126756500	126763499	27	12	2.65705	0.376357	1.34664e-06	1	3.25514e-05	1
chr2	126903000	126910999	19	26	0.9138	1.09433	1	0.00464957	1	0.00690317
chr2	127019500	127023999	5	16	0.435399	2.29675	1	1.34906e-06	1	3.41504e-06
chr2	127091000	127097499	8	27	0.396524	2.52192	1	3.48023e-10	1	2.09434e-09
chr2	127528000	127531999	6	17	0.479745	2.08444	1	3.73944e-06	1	8.62724e-06
chr2	127583000	127587999	7	20	0.469954	2.12787	1	6.12245e-07	1	1.66203e-06
chr2	127691000	127701499	15	33	0.580532	1.72256	1	2.08034e-07	1	6.34721e-07
chr2	127847000	127852499	7	18	0.519423	1.92521	1	8.25769e-06	1	1.77319e-05
chr2	127943500	127956999	36	25	1.75555	0.569622	0.000535356	1	0.00420913	1
chr2	128080000	128087999	12	28	0.553006	1.8083	1	4.44645e-07	1	1.23479e-06
chr2	128409000	128411999	4	19	0.308407	3.24246	1	3.12892e-10	1	1.92741e-09
chr2	128433500	128437499	5	19	0.370089	2.70205	1	1.26298e-08	1	5.00179e-08
chr2	128450000	128456499	10	23	0.565414	1.76862	1	4.62459e-06	1	1.04246e-05
chr2	128520000	128533999	38	27	1.71827	0.581981	0.000606884	1	0.00464576	1
chr2	128578000	128581999	4	17	0.342675	2.91822	1	1.15242e-08	1	4.64503e-08
chr2	129008000	129008499	1	10	0.224296	4.45839	1	1.18568e-09	1	6.22563e-09
chr2	129460000	129474499	41	29	1.72708	0.579011	0.000367505	1	0.00308969	1
chr2	129635500	129644999	15	32	0.598124	1.6719	1	5.9045e-07	1	1.61625e-06
chr2	130352500	130359499	6	25	0.332131	3.01086	1	1.69342e-11	1	1.48045e-10
chr2	130384500	130391999	11	25	0.569368	1.75633	1	2.4997e-06	1	5.95027e-06
chr2	130835500	130841499	10	22	0.589997	1.69492	1	1.39527e-05	1	2.89419e-05
chr2	131026000	131034499	15	34	0.563945	1.77322	1	7.12729e-08	1	2.35251e-07
chr2	131049000	131058999	7	35	0.27414	3.64777	1	1.50644e-17	1	7.57014e-16
chr2	131099500	131105999	3	24	0.197381	5.06635	1	2.78039e-17	1	1.30789e-15
chr2	132567500	132575499	7	22	0.429089	2.33052	1	3.79105e-08	1	1.38708e-07
chr2	132895000	132909999	37	23	1.95325	0.511968	5.48736e-05	1	0.00065226	1
chr2	133017500	133033499	39	16	2.90266	0.344512	1.36798e-09	1	1.24457e-07	1
chr2	133499500	133511499	20	31	0.80957	1.23522	1	0.000344513	1	0.000578339
chr2	133531000	133533499	3	17	0.27414	3.64777	1	1.39124e-10	1	9.34529e-10
chr2	133580500	133586499	8	23	0.462611	2.16164	1	1.01189e-07	1	3.25495e-07
chr2	133832000	133837999	8	18	0.584351	1.7113	1	4.90504e-05	1	9.26349e-05
chr2	134019500	134022999	5	20	0.352466	2.83716	1	2.41225e-09	1	1.13231e-08
chr2	134363000	134368999	9	20	0.587443	1.70229	1	2.61943e-05	1	5.16771e-05
chr2	134426000	134429999	3	15	0.308407	3.24246	1	7.32187e-09	1	3.14897e-08
chr2	134633000	134640999	9	25	0.474473	2.1076	1	6.31336e-08	1	2.12775e-07
chr2	134891000	134896999	4	22	0.26818	3.72883	1	9.81912e-13	1	1.20344e-11
chr2	134940500	134949999	9	32	0.373827	2.67503	1	3.00472e-12	1	3.21812e-11
chr2	135236500	135248999	16	38	0.537736	1.85965	1	4.26632e-09	1	1.93274e-08
chr2	135303500	135310499	11	24	0.592142	1.68878	1	7.4206e-06	1	1.61342e-05
chr2	135563500	135568999	9	19	0.616815	1.62123	1	7.70822e-05	1	0.000141398
chr2	135803500	135808999	11	19	0.740178	1.35103	1	0.000947043	1	0.001507
chr2	135996000	136002499	9	24	0.493452	2.02654	1	2.28095e-07	1	6.79646e-07
chr2	136149000	136153499	4	23	0.257006	3.89096	1	1.31851e-13	1	2.12682e-12
chr2	136212500	136214999	3	17	0.27414	3.64777	1	1.39124e-10	1	9.34529e-10
chr2	136281000	136284499	6	20	0.41121	2.43185	1	5.16103e-08	1	1.79719e-07
chr2	136402500	136408499	13	21	0.785037	1.27383	1	0.00134445	1	0.00210271
chr2	136564500	136568499	6	18	0.454495	2.20024	1	9.41891e-07	1	2.4466e-06
chr2	136609000	136615499	3	21	0.224296	4.45839	1	2.70384e-14	1	4.93336e-13
chr2	137511500	137532999	39	26	1.8276	0.547166	0.000154893	1	0.0015131	1
chr2	137726000	137730499	8	19	0.555133	1.80137	1	1.55743e-05	1	3.18251e-05
chr2	137827000	137832999	4	23	0.257006	3.89096	1	1.31851e-13	1	2.12682e-12
chr2	138454500	138463999	16	26	0.77673	1.28745	1	0.00043663	1	0.000721925
chr2	138699500	138710999	29	15	2.31306	0.432329	1.13235e-05	1	0.000183189	1
chr2	138839000	138852499	34	24	1.72708	0.579011	0.000947512	1	0.00674502	1
chr2	138882500	138886999	7	18	0.519423	1.92521	1	8.25769e-06	1	1.77319e-05
chr2	140679000	140685999	6	23	0.359809	2.77925	1	4.73408e-10	1	2.67852e-09
chr2	144167500	144175999	6	27	0.308407	3.24246	1	5.22154e-13	1	6.94723e-12
chr2	144350000	144358499	8	27	0.396524	2.52192	1	3.48023e-10	1	2.09434e-09
chr2	144426000	144432499	9	22	0.536361	1.86442	1	2.65297e-06	1	6.25263e-06
chr2	144932500	144936999	5	21	0.336444	2.97226	1	4.40219e-10	1	2.53579e-09
chr2	145190000	145197499	14	24	0.740178	1.35103	1	0.000312601	1	0.000526315
chr2	145366500	145382999	41	20	2.46726	0.405308	6.71513e-08	1	3.04628e-06	1
chr2	146430000	146433999	7	21	0.448593	2.22919	1	1.55672e-07	1	4.82157e-07
chr2	146836000	146844999	11	25	0.569368	1.75633	1	2.4997e-06	1	5.95027e-06
chr2	147457000	147461499	8	25	0.427026	2.34178	1	6.38796e-09	1	2.8187e-08
chr2	147533000	147550499	41	33	1.5239	0.656213	0.00383633	1	0.0215548	1
chr2	148087000	148090999	7	16	0.580532	1.72256	1	9.14606e-05	1	0.000165436
chr2	148904500	148910499	8	25	0.427026	2.34178	1	6.38796e-09	1	2.8187e-08
chr2	149169500	149195499	42	57	0.914588	1.09339	1	0.000116045	1	0.00020671
chr2	149445500	149450999	6	21	0.392519	2.54765	1	1.1276e-08	1	4.61407e-08
chr2	150019500	150021999	2	14	0.246726	4.05308	1	2.36139e-10	1	1.5208e-09
chr2	150937000	150941999	4	22	0.26818	3.72883	1	9.81912e-13	1	1.20344e-11
chr2	151078500	151085999	17	24	0.888213	1.12586	1	0.00414548	1	0.00618275
chr2	151283500	151288499	3	16	0.290266	3.44512	1	1.03803e-09	1	5.62147e-09
chr2	151297500	151301499	4	18	0.324639	3.08034	1	1.94726e-09	1	9.78237e-09
chr2	151353000	151363999	17	34	0.634438	1.5762	1	1.20403e-06	1	3.08111e-06
chr2	151389000	151393499	8	19	0.555133	1.80137	1	1.55743e-05	1	3.18251e-05
chr2	151557500	151563999	13	22	0.750905	1.33173	1	0.000597444	1	0.000971756
chr2	151564500	151578499	38	22	2.09181	0.478056	9.85938e-06	1	0.000163743	1
chr2	151721000	151740999	42	32	1.60746	0.622101	0.00133084	1	0.0088837	1
chr2	151755000	151761999	4	26	0.22845	4.37733	1	2.52151e-16	1	8.94988e-15
chr2	151949000	151953499	8	19	0.555133	1.80137	1	1.55743e-05	1	3.18251e-05
chr2	152003000	152009999	11	29	0.493452	2.02654	1	2.2661e-08	1	8.5971e-08
chr2	152252500	152269999	42	24	2.12184	0.471288	2.79152e-06	1	5.84718e-05	1
chr2	152530000	152538499	12	31	0.501162	1.99536	1	1.32045e-08	1	5.16634e-08
chr2	152795000	152808999	34	23	1.79904	0.555851	0.000460247	1	0.00369491	1
chr2	154748000	154760499	32	12	3.13152	0.319334	3.84693e-09	1	2.88878e-07	1
chr2	155388000	155391999	7	19	0.493452	2.02654	1	2.30198e-06	1	5.53129e-06
chr2	156374000	156380999	7	22	0.429089	2.33052	1	3.79105e-08	1	1.38708e-07
chr2	156593000	156593999	2	12	0.284684	3.51267	1	1.91684e-08	1	7.32579e-08
chr2	157040500	157046499	6	22	0.375453	2.66345	1	2.35904e-09	1	1.12877e-08
chr2	157184500	157200999	40	32	1.53269	0.652447	0.00379428	1	0.0214349	1
chr2	157464000	157473499	13	30	0.557123	1.79494	1	2.42334e-07	1	7.14233e-07
chr2	157501000	157505499	7	17	0.54828	1.82389	1	2.82e-05	1	5.52913e-05
chr2	157593000	157606999	37	16	2.75753	0.362644	1.29815e-08	1	7.94634e-07	1
chr2	157653500	157657999	10	20	0.646187	1.54754	1	0.000112251	1	0.000200556
chr2	157733000	157745499	33	10	3.81304	0.262258	1.05305e-11	1	2.95533e-09	1
chr2	157779000	157787999	15	32	0.598124	1.6719	1	5.9045e-07	1	1.61625e-06
chr2	158047000	158052999	10	21	0.616815	1.62123	1	4.04198e-05	1	7.75248e-05
chr2	158641500	158648999	17	27	0.793048	1.26096	1	0.000501511	1	0.000822833
chr2	158798000	158808499	18	27	0.837106	1.19459	1	0.00116085	1	0.00182348
chr2	158969000	158975499	20	26	0.95949	1.04222	1	0.00874295	1	0.0127077
chr2	159173000	159189999	51	39	1.60372	0.623551	0.000545257	1	0.00426772	1
chr2	159220500	159223999	3	20	0.234977	4.25573	1	2.45907e-13	1	3.58742e-12
chr2	159297000	159305499	15	30	0.636712	1.57057	1	4.35973e-06	1	9.87935e-06
chr2	159348000	159352999	7	19	0.493452	2.02654	1	2.30198e-06	1	5.53129e-06
chr2	159363500	159367499	8	18	0.584351	1.7113	1	4.90504e-05	1	9.26349e-05
chr2	159403000	159409499	12	20	0.763676	1.30946	1	0.00114404	1	0.00180152
chr2	159487500	159494499	26	17	1.85044	0.540411	0.00104899	1	0.00721459	1
chr2	159844500	159855499	15	33	0.580532	1.72256	1	2.08034e-07	1	6.34721e-07
chr2	160562500	160572499	15	28	0.680623	1.46924	1	2.85048e-05	1	5.56846e-05
chr2	161212500	161237499	46	28	1.99933	0.500167	5.40007e-06	1	9.85282e-05	1
chr2	162093000	162097499	3	14	0.328968	3.03981	1	4.86655e-08	1	1.71886e-07
chr2	162237500	162250999	21	39	0.678496	1.47385	1	1.46208e-06	1	3.64129e-06
chr2	162700000	162704499	7	20	0.469954	2.12787	1	6.12245e-07	1	1.66203e-06
chr2	163128500	163144499	36	21	2.07474	0.481988	1.85364e-05	1	0.000273065	1
chr2	164068000	164070999	1	21	0.112148	8.91678	1	4.04278e-24	1	1.61302e-21
chr2	164504000	164508499	4	17	0.342675	2.91822	1	1.15242e-08	1	4.64503e-08
chr2	164590500	164596499	6	18	0.454495	2.20024	1	9.41891e-07	1	2.4466e-06
chr2	164607000	164613499	5	21	0.336444	2.97226	1	4.40219e-10	1	2.53579e-09
chr2	164811500	164829999	32	26	1.50777	0.663231	0.00972632	0.443394	0.0476475	0.535658
chr2	164861000	164867999	13	21	0.785037	1.27383	1	0.00134445	1	0.00210271
chr2	165620500	165627499	13	21	0.785037	1.27383	1	0.00134445	1	0.00210271
chr2	165861000	165864499	8	18	0.584351	1.7113	1	4.90504e-05	1	9.26349e-05
chr2	165952500	165960499	27	15	2.15885	0.463209	6.94826e-05	1	0.000788819	1
chr2	166069000	166084999	35	20	2.11479	0.472859	1.53853e-05	1	0.000234577	1
chr2	166102500	166111999	15	25	0.759157	1.31725	1	0.000373381	1	0.000624551
chr2	166261000	166264499	8	16	0.653098	1.53116	1	0.00041937	1	0.000695785
chr2	166596500	166608999	33	26	1.55346	0.643724	0.00580766	1	0.0308909	1
chr2	167268000	167276999	10	24	0.542797	1.84231	1	1.47395e-06	1	3.65464e-06
chr2	167378000	167383499	26	11	2.77567	0.360274	8.12067e-07	1	2.13771e-05	1
chr2	167651000	167662499	34	18	2.27248	0.440049	4.09959e-06	1	7.96726e-05	1
chr2	167853500	167869999	41	25	1.99279	0.50181	1.60188e-05	1	0.000241237	1
chr2	167927500	167953999	53	57	1.14855	0.870662	0.14217	0.0165058	0.492428	0.0234706
chr2	168304500	168321999	36	26	1.69053	0.591531	0.00105945	1	0.0072609	1
chr2	168419000	168432999	41	32	1.57007	0.636913	0.00227139	1	0.0138271	1
chr2	168465500	168475999	29	14	2.46726	0.405308	3.08892e-06	1	6.37735e-05	1
chr2	168498000	168504999	15	23	0.82242	1.21592	1	0.00174264	1	0.00268965
chr2	168694000	168708999	37	18	2.46726	0.405308	2.39824e-07	1	8.14566e-06	1
chr2	168727000	168730499	4	16	0.362832	2.75609	1	6.46891e-08	1	2.15756e-07
chr2	169074000	169080999	9	24	0.493452	2.02654	1	2.28095e-07	1	6.79646e-07
chr2	169121500	169141999	47	36	1.60038	0.62485	0.000861923	1	0.00623219	1
chr2	169546000	169550999	8	19	0.555133	1.80137	1	1.55743e-05	1	3.18251e-05
chr2	169666500	169677499	19	30	0.79589	1.25645	1	0.000306212	1	0.000516556
chr2	169793500	169799499	10	27	0.48464	2.06339	1	3.82426e-08	1	1.38182e-07
chr2	169840000	169846999	5	27	0.264349	3.78287	1	6.89638e-15	1	1.59039e-13
chr2	170214500	170240999	67	47	1.74764	0.5722	7.97758e-06	1	0.000136248	1
chr2	170368000	170380499	35	28	1.5314	0.652996	0.00598985	1	0.0315007	1
chr2	170434000	170440999	11	17	0.82242	1.21592	1	0.0048555	1	0.00719987
chr2	170622000	170630499	7	26	0.36552	2.73583	1	8.94897e-11	1	6.34863e-10
chr2	170885000	170895999	42	22	2.30635	0.433585	3.15228e-07	1	1.00569e-05	1
chr2	170975500	170988499	19	38	0.632631	1.5807	1	3.34216e-07	1	9.54788e-07
chr2	171162000	171172999	14	40	0.451328	2.21568	1	8.61125e-12	1	8.12451e-11
chr2	171544500	171551999	11	26	0.54828	1.82389	1	8.12067e-07	1	2.13703e-06
chr2	172093000	172095999	4	21	0.28037	3.56671	1	7.01171e-12	1	6.74607e-11
chr2	172254500	172258999	5	19	0.370089	2.70205	1	1.26298e-08	1	5.00179e-08
chr2	172308500	172314999	11	29	0.493452	2.02654	1	2.2661e-08	1	8.5971e-08
chr2	172720500	172732499	16	43	0.47663	2.09806	1	1.14282e-11	1	1.06129e-10
chr2	172984500	172990999	26	16	1.95929	0.510388	0.00043663	1	0.00352497	1
chr2	173226500	173234499	8	34	0.317219	3.1524	1	4.69662e-15	1	1.11734e-13
chr2	173265000	173282999	46	27	2.07074	0.48292	2.134e-06	1	4.7589e-05	1
chr2	173408500	173417499	10	26	0.50259	1.98969	1	1.33866e-07	1	4.21439e-07
chr2	173640000	173643499	1	19	0.123363	8.10616	1	2.85231e-21	1	4.43461e-19
chr2	174536500	174543999	6	33	0.253983	3.93728	1	6.90378e-18	1	3.836e-16
chr2	174600500	174606499	6	26	0.31983	3.12666	1	3.02731e-12	1	3.20602e-11
chr2	174816500	174828499	13	37	0.454495	2.20024	1	5.07081e-11	1	3.88176e-10
chr2	175066500	175072999	10	27	0.48464	2.06339	1	3.82426e-08	1	1.38182e-07
chr2	175293500	175301499	11	26	0.54828	1.82389	1	8.12067e-07	1	2.13703e-06
chr2	176069500	176076499	10	24	0.542797	1.84231	1	1.47395e-06	1	3.65464e-06
chr2	176121500	176149499	74	66	1.38093	0.72415	0.00316632	0.198297	0.0184475	0.25439
chr2	176165500	176191999	59	47	1.54204	0.648493	0.00062752	1	0.00477284	1
chr2	176210000	176223999	33	22	1.82363	0.548358	0.00042183	1	0.00344836	1
chr2	176363000	176368499	9	23	0.514012	1.94548	1	7.93376e-07	1	2.1049e-06
chr2	176841500	176847999	11	25	0.569368	1.75633	1	2.4997e-06	1	5.95027e-06
chr2	176934000	176947499	35	22	1.9309	0.517894	0.000101386	1	0.00106689	1
chr2	177574000	177587999	43	28	1.87171	0.53427	4.75481e-05	1	0.000582754	1
chr2	177607500	177628999	42	30	1.71116	0.584398	0.000388637	1	0.00322398	1
chr2	177691000	177695999	11	21	0.672889	1.48613	1	0.000154137	1	0.000270734
chr2	177749500	177760999	30	18	2.01276	0.496829	0.000123344	1	0.0012522	1
chr2	177958500	177971499	31	19	1.97381	0.506635	0.000143756	1	0.00141643	1
chr2	177989500	177998499	8	22	0.482725	2.07157	1	3.79773e-07	1	1.06771e-06
chr2	178061500	178078499	48	40	1.47434	0.678271	0.00396276	0.389786	0.0217377	0.476649
chr2	178284500	178286999	3	18	0.259712	3.85043	1	1.76798e-11	1	1.51132e-10
chr2	178381500	178413499	55	68	1.00121	0.998795	1	0.000418297	1	0.000694735
chr2	178428500	178435499	6	31	0.269857	3.70567	1	3.30636e-16	1	1.10265e-14
chr2	178571000	178580999	34	27	1.54204	0.648493	0.00590584	1	0.0312375	1
chr2	178594500	178600999	7	21	0.448593	2.22919	1	1.55672e-07	1	4.82157e-07
chr2	179148500	179164499	36	23	1.90185	0.525805	0.000114343	1	0.00117559	1
chr2	179323500	179335499	34	16	2.53983	0.393728	3.13551e-07	1	1.01303e-05	1
chr2	180659500	180662499	6	21	0.392519	2.54765	1	1.1276e-08	1	4.61407e-08
chr2	180755000	180762999	10	25	0.52192	1.916	1	4.5237e-07	1	1.24933e-06
chr2	181017000	181026499	4	22	0.26818	3.72883	1	9.81912e-13	1	1.20344e-11
chr2	181651000	181659499	10	33	0.399116	2.50554	1	1.05305e-11	1	9.84275e-11
chr2	181875500	181882999	9	28	0.42539	2.35079	1	1.07981e-09	1	5.76108e-09
chr2	181935000	181948499	40	24	2.02315	0.494278	1.38032e-05	1	0.000214907	1
chr2	181956500	181961499	6	17	0.479745	2.08444	1	3.73944e-06	1	8.62724e-06
chr2	182014000	182016499	3	16	0.290266	3.44512	1	1.03803e-09	1	5.62147e-09
chr2	182283500	182288999	8	22	0.482725	2.07157	1	3.79773e-07	1	1.06771e-06
chr2	182786500	182794499	18	27	0.837106	1.19459	1	0.00116085	1	0.00182348
chr2	182867500	182870999	5	18	0.389567	2.56695	1	6.30488e-08	1	2.15095e-07
chr2	182917500	182928499	37	17	2.60433	0.383976	5.95697e-08	1	2.7629e-06	1
chr2	183046000	183066999	52	25	2.51471	0.397661	1.06554e-09	1	1.06285e-07	1
chr2	183542500	183551999	11	27	0.528698	1.89144	1	2.54724e-07	1	7.45971e-07
chr2	183687500	183699499	10	28	0.467929	2.13708	1	1.05589e-08	1	4.37743e-08
chr2	183703000	183710499	8	24	0.444107	2.25171	1	2.5914e-08	1	9.67278e-08
chr2	183889000	183895999	14	26	0.68535	1.45911	1	5.46181e-05	1	0.000102356
chr2	183997000	184017999	37	25	1.803	0.554632	0.000278285	1	0.00245163	1
chr2	184538500	184545499	6	26	0.31983	3.12666	1	3.02731e-12	1	3.20602e-11
chr2	184904500	184909499	7	19	0.493452	2.02654	1	2.30198e-06	1	5.53129e-06
chr2	184936500	184940999	7	23	0.41121	2.43185	1	8.85773e-09	1	3.73815e-08
chr2	185564500	185570999	6	30	0.278562	3.58987	1	2.18699e-15	1	5.64053e-14
chr2	185783000	185810499	53	39	1.6654	0.600456	0.000181785	1	0.00173737	1
chr2	186420500	186435999	38	32	1.45793	0.685906	0.00991312	0.369638	0.0475015	0.453822
chr2	186439000	186445499	13	21	0.785037	1.27383	1	0.00134445	1	0.00210271
chr2	187249500	187258999	7	29	0.328968	3.03981	1	6.5547e-13	1	8.38739e-12
chr2	187710000	187713999	5	21	0.336444	2.97226	1	4.40219e-10	1	2.53579e-09
chr2	187765500	187772999	7	23	0.41121	2.43185	1	8.85773e-09	1	3.73815e-08
chr2	188668000	188695999	60	39	1.88129	0.531551	2.29246e-06	1	4.92009e-05	1
chr2	188828500	188834499	4	21	0.28037	3.56671	1	7.01171e-12	1	6.74607e-11
chr2	188865000	188885999	47	25	2.27747	0.439084	1.14015e-07	1	4.59335e-06	1
chr2	189120500	189135999	34	17	2.39872	0.416888	1.20403e-06	1	2.9448e-05	1
chr2	189388000	189391999	8	17	0.616815	1.62123	1	0.000147131	1	0.000259515
chr2	189459000	189483999	48	55	1.07943	0.926418	0.273294	0.00581534	0.883139	0.00856144
chr2	189534000	189544999	32	17	2.26165	0.442154	7.81124e-06	1	0.000134308	1
chr2	189754000	189762499	15	30	0.636712	1.57057	1	4.35973e-06	1	9.87935e-06
chr2	190039000	190053999	34	25	1.66066	0.602172	0.00183848	1	0.0116078	1
chr2	190077500	190091499	32	21	1.85044	0.540411	0.000383158	1	0.00319613	1
chr2	190381000	190384499	7	17	0.54828	1.82389	1	2.82e-05	1	5.52913e-05
chr2	190404500	190415999	34	24	1.72708	0.579011	0.000947512	1	0.00674502	1
chr2	190438500	190440499	0	14	0.082242	12.1592	1	1.53529e-14	1	3.30576e-13
chr2	190453000	190464999	19	36	0.666827	1.49964	1	2.15477e-06	1	5.22612e-06
chr2	190480000	190488499	4	26	0.22845	4.37733	1	2.52151e-16	1	8.94988e-15
chr2	190657000	190659999	1	18	0.129856	7.70085	1	7.05147e-20	1	6.9499e-18
chr2	190743000	190756499	20	42	0.60247	1.65983	1	2.49916e-08	1	9.37708e-08
chr2	190835000	190848999	33	42	0.975428	1.02519	1	0.00231359	1	0.00353008
chr2	190943500	190959499	49	35	1.71337	0.583644	0.000151705	1	0.00148855	1
chr2	191017500	191029499	13	39	0.43177	2.31605	1	3.54757e-12	1	3.61481e-11
chr2	191044000	191050999	12	27	0.572757	1.74594	1	1.34664e-06	1	3.42963e-06
chr2	191161000	191168499	17	31	0.693917	1.4411	1	1.90701e-05	1	3.84468e-05
chr2	191183500	191187999	6	17	0.479745	2.08444	1	3.73944e-06	1	8.62724e-06
chr2	191488500	191506499	40	32	1.53269	0.652447	0.00379428	1	0.0214349	1
chr2	191824500	191830999	8	21	0.504667	1.98151	1	1.36782e-06	1	3.42794e-06
chr2	191875000	191895499	46	33	1.70531	0.586403	0.000248932	1	0.00224745	1
chr2	192288000	192299499	31	24	1.57905	0.633294	0.00556516	1	0.0298891	1
chr2	193617000	193617999	0	12	0.0948946	10.538	1	4.94387e-12	1	4.95074e-11
chr2	194335500	194342499	10	22	0.589997	1.69492	1	1.39527e-05	1	2.89419e-05
chr2	195143000	195145499	1	17	0.13707	7.29554	1	1.65645e-18	1	1.13103e-16
chr2	195840000	195856499	37	29	1.5626	0.63996	0.00362379	1	0.0207049	1
chr2	196176000	196181999	12	21	0.728963	1.37181	1	0.000490865	1	0.000807806
chr2	196315500	196338499	49	40	1.50443	0.664705	0.00249405	0.440474	0.0148255	0.532576
chr2	197220500	197240499	51	39	1.60372	0.623551	0.000545257	1	0.00426772	1
chr2	198060000	198064499	6	17	0.479745	2.08444	1	3.73944e-06	1	8.62724e-06
chr2	198207000	198217999	12	26	0.59397	1.68359	1	3.94302e-06	1	9.01838e-06
chr2	199049000	199057999	8	25	0.427026	2.34178	1	6.38796e-09	1	2.8187e-08
chr2	199111500	199112499	3	13	0.352466	2.83716	1	3.03679e-07	1	8.72669e-07
chr2	199760500	199779999	51	43	1.45793	0.685906	0.00394583	0.359936	0.0217602	0.442599
chr2	199830500	199833999	6	16	0.507965	1.96864	1	1.40929e-05	1	2.90453e-05
chr2	200303000	200324499	52	40	1.59469	0.62708	0.000558467	1	0.00435875	1
chr2	200369500	200381999	12	45	0.348634	2.86833	1	3.82666e-17	1	1.6041e-15
chr2	200528000	200544499	36	25	1.75555	0.569622	0.000535356	1	0.00420913	1
chr2	200645000	200650499	9	23	0.514012	1.94548	1	7.93376e-07	1	2.1049e-06
chr2	200694000	200699499	12	17	0.890955	1.12239	1	0.0111163	1	0.0160216
chr2	200807500	200810499	8	18	0.584351	1.7113	1	4.90504e-05	1	9.26349e-05
chr2	200817500	200822499	7	22	0.429089	2.33052	1	3.79105e-08	1	1.38708e-07
chr2	201286000	201290999	5	20	0.352466	2.83716	1	2.41225e-09	1	1.13231e-08
chr2	201359500	201370999	31	21	1.79437	0.557298	0.000763316	1	0.00561358	1
chr2	201928500	201935999	8	32	0.336444	2.97226	1	1.34603e-13	1	2.11557e-12
chr2	202007000	202027499	37	62	0.744094	1.34392	1	9.97502e-08	1	3.22874e-07
chr2	202127000	202137999	18	44	0.520866	1.91988	1	1.35865e-10	1	9.24831e-10
chr2	202762000	202763999	3	15	0.308407	3.24246	1	7.32187e-09	1	3.14897e-08
chr2	202853000	202858499	8	17	0.616815	1.62123	1	0.000147131	1	0.000259515
chr2	203483000	203489999	5	29	0.246726	4.05308	1	1.28889e-16	1	4.92306e-15
chr2	203607500	203615999	9	26	0.4569	2.18866	1	1.68458e-08	1	6.50877e-08
chr2	204649500	204673499	61	43	1.7383	0.575276	2.12037e-05	1	0.000302143	1
chr2	204756500	204763499	12	19	0.801859	1.2471	1	0.00255414	1	0.00388013
chr2	204819000	204825999	4	19	0.308407	3.24246	1	3.12892e-10	1	1.92741e-09
chr2	204873500	204882999	29	18	1.94784	0.51339	0.000268603	1	0.00238986	1
chr2	205318000	205320999	4	17	0.342675	2.91822	1	1.15242e-08	1	4.64503e-08
chr2	205329500	205334999	9	21	0.560741	1.78336	1	8.51554e-06	1	1.80793e-05
chr2	205557000	205584999	81	88	1.1366	0.879815	0.115861	0.00352181	0.410447	0.00529503
chr2	205677500	205684999	10	24	0.542797	1.84231	1	1.47395e-06	1	3.65464e-06
chr2	205940000	205948499	18	30	0.756096	1.32258	1	0.000123344	1	0.000219429
chr2	206201500	206204999	8	20	0.528698	1.89144	1	4.71976e-06	1	1.05536e-05
chr2	206254500	206261499	8	18	0.584351	1.7113	1	4.90504e-05	1	9.26349e-05
chr2	206279000	206279999	3	16	0.290266	3.44512	1	1.03803e-09	1	5.62147e-09
chr2	206467000	206474999	13	32	0.523358	1.91074	1	2.48029e-08	1	9.33484e-08
chr2	206960000	206976999	35	28	1.5314	0.652996	0.00598985	1	0.0315007	1
chr2	207194000	207202999	18	28	0.80824	1.23726	1	0.000567261	1	0.000927721
chr2	207408000	207422499	41	27	1.85044	0.540411	8.59388e-05	1	0.000934324	1
chr2	207694000	207707499	32	13	2.90784	0.343898	2.48029e-08	1	1.33124e-06	1
chr2	207760500	207777999	41	22	2.25272	0.443909	7.71579e-07	1	2.06061e-05	1
chr2	207848500	207850999	4	16	0.362832	2.75609	1	6.46891e-08	1	2.15756e-07
chr2	208036000	208041499	8	20	0.528698	1.89144	1	4.71976e-06	1	1.05536e-05
chr2	208124500	208130499	8	17	0.616815	1.62123	1	0.000147131	1	0.000259515
chr2	208226000	208231999	10	22	0.589997	1.69492	1	1.39527e-05	1	2.89419e-05
chr2	208542000	208558999	37	26	1.73622	0.575964	0.000571649	1	0.00442514	1
chr2	209530500	209534499	4	17	0.342675	2.91822	1	1.15242e-08	1	4.64503e-08
chr2	210466000	210472999	11	26	0.54828	1.82389	1	8.12067e-07	1	2.13703e-06
chr2	210568000	210591499	46	37	1.52581	0.655392	0.00243951	1	0.0146088	1
chr2	210604500	210619499	37	21	2.13081	0.469304	8.14742e-06	1	0.000138222	1
chr2	210707500	210715499	5	27	0.264349	3.78287	1	6.89638e-15	1	1.59039e-13
chr2	210891500	210896999	5	21	0.336444	2.97226	1	4.40219e-10	1	2.53579e-09
chr2	215809500	215820999	11	33	0.435399	2.29675	1	1.2324e-10	1	8.45147e-10
chr2	215909500	215918499	13	29	0.575694	1.73703	1	7.23724e-07	1	1.93734e-06
chr2	216234500	216245499	34	23	1.79904	0.555851	0.000460247	1	0.00369491	1
chr2	216314500	216316999	3	16	0.290266	3.44512	1	1.03803e-09	1	5.62147e-09
chr2	216332000	216351499	47	27	2.11479	0.472859	9.57756e-07	1	2.45109e-05	1
chr2	216352000	216356499	3	20	0.234977	4.25573	1	2.45907e-13	1	3.58742e-12
chr2	216437000	216445499	29	16	2.17699	0.459349	3.63692e-05	1	0.00046574	1
chr2	216532500	216542499	11	29	0.493452	2.02654	1	2.2661e-08	1	8.5971e-08
chr2	216567500	216604499	90	72	1.53781	0.650274	4.63229e-05	1	0.000569001	1
chr2	216720500	216728499	9	28	0.42539	2.35079	1	1.07981e-09	1	5.76108e-09
chr2	216789500	216799499	13	25	0.664262	1.50543	1	4.15609e-05	1	7.92086e-05
chr2	217092000	217095999	3	18	0.259712	3.85043	1	1.76798e-11	1	1.51132e-10
chr2	217186500	217192499	5	23	0.308407	3.24246	1	1.28861e-11	1	1.17981e-10
chr2	217262500	217273499	17	32	0.672889	1.48613	1	7.81124e-06	1	1.6907e-05
chr2	217416500	217425499	10	30	0.43774	2.28446	1	7.29802e-10	1	4.03004e-09
chr2	217771000	217776499	12	21	0.728963	1.37181	1	0.000490865	1	0.000807806
chr2	217831500	217838499	9	26	0.4569	2.18866	1	1.68458e-08	1	6.50877e-08
chr2	218178500	218184999	7	21	0.448593	2.22919	1	1.55672e-07	1	4.82157e-07
chr2	218265500	218268999	8	18	0.584351	1.7113	1	4.90504e-05	1	9.26349e-05
chr2	218400000	218409999	12	29	0.534573	1.87065	1	1.4209e-07	1	4.44037e-07
chr2	218414500	218421499	4	22	0.26818	3.72883	1	9.81912e-13	1	1.20344e-11
chr2	218594000	218603499	19	26	0.9138	1.09433	1	0.00464957	1	0.00690317
chr2	218609000	218623999	37	28	1.61648	0.618628	0.00205468	1	0.0127756	1
chr2	218782500	218790999	6	36	0.233389	4.28468	1	1.68263e-20	1	2.15142e-18
chr2	219029000	219032999	2	16	0.217699	4.59349	1	2.25413e-12	1	2.47506e-11
chr2	219349000	219360499	16	44	0.466038	2.14575	1	3.26595e-12	1	3.43132e-11
chr2	219367000	219369999	1	18	0.129856	7.70085	1	7.05147e-20	1	6.9499e-18
chr2	219475500	219486499	32	25	1.56576	0.638667	0.0056944	1	0.0304498	1
chr2	220060000	220066499	9	20	0.587443	1.70229	1	2.61943e-05	1	5.16771e-05
chr2	220666000	220676999	29	15	2.31306	0.432329	1.13235e-05	1	0.000183189	1
chr2	220973000	220977999	6	18	0.454495	2.20024	1	9.41891e-07	1	2.4466e-06
chr2	221660500	221662499	0	13	0.0881164	11.3486	1	2.85101e-13	1	4.01933e-12
chr2	222748500	222755499	4	19	0.308407	3.24246	1	3.12892e-10	1	1.92741e-09
chr2	222786500	222792499	9	23	0.514012	1.94548	1	7.93376e-07	1	2.1049e-06
chr2	222979000	222986499	13	24	0.690833	1.44753	1	0.000104907	1	0.0001884
chr2	223576000	223580499	6	21	0.392519	2.54765	1	1.1276e-08	1	4.61407e-08
chr2	223619000	223620999	3	16	0.290266	3.44512	1	1.03803e-09	1	5.62147e-09
chr2	223867500	223886499	58	31	2.2745	0.439656	6.1263e-09	1	4.33501e-07	1
chr2	223993500	224003999	7	33	0.290266	3.44512	1	5.95581e-16	1	1.94509e-14
chr2	224020000	224028499	15	32	0.598124	1.6719	1	5.9045e-07	1	1.61625e-06
chr2	224096500	224106999	10	23	0.565414	1.76862	1	4.62459e-06	1	1.04246e-05
chr2	224369000	224375999	7	24	0.394762	2.53317	1	1.9888e-09	1	9.80806e-09
chr2	224405000	224407999	11	16	0.870797	1.14837	1	0.0102253	1	0.0147663
chr2	224588000	224598999	20	39	0.647656	1.54403	1	4.52582e-07	1	1.24596e-06
chr2	224713000	224715999	3	12	0.379578	2.6345	1	1.77178e-06	1	4.33116e-06
chr2	224923000	224926499	5	16	0.435399	2.29675	1	1.34906e-06	1	3.41504e-06
chr2	226081500	226098499	39	26	1.8276	0.547166	0.000154893	1	0.0015131	1
chr2	226181000	226183499	6	16	0.507965	1.96864	1	1.40929e-05	1	2.90453e-05
chr2	226616500	226625499	8	28	0.382851	2.61198	1	7.71067e-11	1	5.59848e-10
chr2	226876500	226916999	91	57	1.95679	0.511041	1.92373e-09	1	1.6677e-07	1
chr2	227075500	227087999	33	18	2.20755	0.452991	1.0015e-05	1	0.000163944	1
chr2	227178500	227186499	9	34	0.352466	2.83716	1	1.32431e-13	1	2.09836e-12
chr2	227648500	227652499	5	18	0.389567	2.56695	1	6.30488e-08	1	2.15095e-07
chr2	227788000	227793499	5	19	0.370089	2.70205	1	1.26298e-08	1	5.00179e-08
chr2	227896500	227913499	40	16	2.97522	0.336109	4.28209e-10	1	4.99316e-08	1
chr2	229015000	229022499	10	21	0.616815	1.62123	1	4.04198e-05	1	7.75248e-05
chr2	229298500	229317499	39	22	2.14544	0.466104	4.31724e-06	1	8.26892e-05	1
chr2	229343500	229359499	36	26	1.69053	0.591531	0.00105945	1	0.0072609	1
chr2	229661500	229680499	36	39	1.14111	0.876342	0.190258	0.0328319	0.637904	0.0456699
chr2	229747500	229761999	41	30	1.67137	0.598312	0.000705062	1	0.00521995	1
chr2	230232000	230242499	8	29	0.370089	2.70205	1	1.65249e-11	1	1.46634e-10
chr2	230360000	230373499	11	41	0.352466	2.83716	1	9.74574e-16	1	2.83105e-14
chr2	230527500	230544499	38	27	1.71827	0.581981	0.000606884	1	0.00464576	1
chr2	230870500	230876499	7	23	0.41121	2.43185	1	8.85773e-09	1	3.73815e-08
chr2	231143000	231149999	5	26	0.27414	3.64777	1	4.79155e-14	1	8.37346e-13
chr2	231213500	231221499	14	27	0.660873	1.51315	1	2.16693e-05	1	4.32394e-05
chr2	231437000	231456999	40	48	1.03222	0.968785	0.389786	0.00396276	1	0.00591529
chr2	231460500	231469999	17	33	0.653098	1.53116	1	3.10963e-06	1	7.23366e-06
chr2	231529000	231531499	3	15	0.308407	3.24246	1	7.32187e-09	1	3.14897e-08
chr2	231597000	231612999	45	36	1.5337	0.652017	0.0024141	1	0.0144881	1
chr2	231882000	231900999	39	33	1.45133	0.689024	0.00989151	0.358815	0.0476808	0.441696
chr2	231921000	231927499	12	25	0.616815	1.62123	1	1.11497e-05	1	2.34315e-05
chr2	232073000	232084499	36	26	1.69053	0.591531	0.00105945	1	0.0072609	1
chr2	232112500	232132499	49	38	1.58158	0.63228	0.00090196	1	0.00647082	1
chr2	232284500	232292999	18	35	0.651082	1.5359	1	1.63351e-06	1	4.0142e-06
chr2	232997000	233001999	10	15	0.84812	1.17908	1	0.00923467	1	0.0133883
chr2	233006000	233009999	2	18	0.194784	5.1339	1	1.71564e-14	1	3.44335e-13
chr2	233176500	233186499	31	15	2.46726	0.405308	1.62832e-06	1	3.82165e-05	1
chr2	233251500	233255999	9	20	0.587443	1.70229	1	2.61943e-05	1	5.16771e-05
chr2	233746000	233753499	11	21	0.672889	1.48613	1	0.000154137	1	0.000270734
chr2	233798000	233802499	3	19	0.246726	4.05308	1	2.13592e-12	1	2.42071e-11
chr2	233834000	233838999	11	24	0.592142	1.68878	1	7.4206e-06	1	1.61342e-05
chr2	234058000	234061499	5	18	0.389567	2.56695	1	6.30488e-08	1	2.15095e-07
chr2	234421000	234425499	10	19	0.678496	1.47385	1	0.000298339	1	0.000504457
chr2	234633500	234638999	3	19	0.246726	4.05308	1	2.13592e-12	1	2.42071e-11
chr2	234701500	234709499	10	28	0.467929	2.13708	1	1.05589e-08	1	4.37743e-08
chr2	234732500	234738999	5	30	0.238767	4.18818	1	1.67738e-17	1	8.26611e-16
chr2	234824000	234827999	3	15	0.308407	3.24246	1	7.32187e-09	1	3.14897e-08
chr2	234963500	234973499	12	34	0.458205	2.18243	1	2.99468e-10	1	1.88182e-09
chr2	235623000	235634499	35	25	1.7081	0.585445	0.00100471	1	0.007012	1
chr2	235737500	235739999	2	17	0.205605	4.8637	1	2.0199e-13	1	3.0925e-12
chr2	235905500	235920499	37	29	1.5626	0.63996	0.00362379	1	0.0207049	1
chr2	236053000	236056499	4	16	0.362832	2.75609	1	6.46891e-08	1	2.15756e-07
chr2	236093500	236099999	10	24	0.542797	1.84231	1	1.47395e-06	1	3.65464e-06
chr2	236562500	236565999	5	18	0.389567	2.56695	1	6.30488e-08	1	2.15095e-07
chr2	236675000	236678499	6	17	0.479745	2.08444	1	3.73944e-06	1	8.62724e-06
chr2	236696500	236701499	11	21	0.672889	1.48613	1	0.000154137	1	0.000270734
chr2	236731000	236734999	12	18	0.844062	1.18475	1	0.00545338	1	0.00804608
chr2	237410000	237429499	47	38	1.51831	0.658625	0.00246118	1	0.0146881	1
chr2	237440500	237445499	7	21	0.448593	2.22919	1	1.55672e-07	1	4.82157e-07
chr2	237469500	237482999	39	25	1.89789	0.5269	6.99503e-05	1	0.000789528	1
chr2	237611500	237615999	3	25	0.189789	5.269	1	2.59078e-18	1	1.5571e-16
chr2	237640000	237644499	4	24	0.246726	4.05308	1	1.7005e-14	1	3.54175e-13
chr2	237682000	237685499	4	18	0.324639	3.08034	1	1.94726e-09	1	9.78237e-09
chr2	237775000	237779999	3	21	0.224296	4.45839	1	2.70384e-14	1	4.93336e-13
chr2	237867500	237873499	7	26	0.36552	2.73583	1	8.94897e-11	1	6.34863e-10
chr2	237965000	237972499	12	27	0.572757	1.74594	1	1.34664e-06	1	3.42963e-06
chr2	238101500	238110999	14	29	0.616815	1.62123	1	3.08892e-06	1	7.20778e-06
chr2	238154000	238160499	9	33	0.362832	2.75609	1	6.39868e-13	1	8.2676e-12
chr2	238243500	238248499	9	19	0.616815	1.62123	1	7.70822e-05	1	0.000141398
chr2	238281500	238302999	55	42	1.60659	0.622437	0.000345761	1	0.00292995	1
chr2	238379000	238386499	16	28	0.723162	1.38282	1	8.60106e-05	1	0.000156287
chr2	238454500	238461499	10	24	0.542797	1.84231	1	1.47395e-06	1	3.65464e-06
chr2	238522000	238554999	84	78	1.32732	0.753396	0.00518969	0.105497	0.0282064	0.140212
chr2	238573500	238590499	27	47	0.719617	1.38963	1	9.57756e-07	1	2.47306e-06
chr2	238597000	238612999	36	28	1.57394	0.635348	0.00355086	1	0.0203902	1
chr2	238651500	238659499	5	28	0.255234	3.91798	1	9.58742e-16	1	2.80971e-14
chr2	238687000	238689999	7	16	0.580532	1.72256	1	9.14606e-05	1	0.000165436
chr2	238801000	238819999	45	21	2.57941	0.387686	4.85966e-09	1	3.5215e-07	1
chr2	238891500	238896999	8	18	0.584351	1.7113	1	4.90504e-05	1	9.26349e-05
chr2	239146500	239156499	30	16	2.24956	0.444531	1.49079e-05	1	0.000230051	1
chr2	239522500	239526499	7	19	0.493452	2.02654	1	2.30198e-06	1	5.53129e-06
chr2	239634500	239662999	56	44	1.5626	0.63996	0.000602806	1	0.00462846	1
chr2	239740500	239747499	12	24	0.641487	1.55888	1	3.04122e-05	1	5.91073e-05
chr2	240057000	240065499	9	30	0.397945	2.51291	1	6.0621e-11	1	4.59809e-10
chr2	240374000	240376999	5	20	0.352466	2.83716	1	2.41225e-09	1	1.13231e-08
chr2	240494000	240498499	7	16	0.580532	1.72256	1	9.14606e-05	1	0.000165436
chr2	240557500	240576499	51	42	1.49183	0.670317	0.00251414	0.418695	0.0148995	0.508565
chr2	240578000	240588499	10	28	0.467929	2.13708	1	1.05589e-08	1	4.37743e-08
chr2	240750000	240754999	8	23	0.462611	2.16164	1	1.01189e-07	1	3.25495e-07
chr2	240927000	240935999	11	32	0.448593	2.22919	1	4.74531e-10	1	2.65583e-09
chr2	241040000	241058999	22	48	0.579051	1.72696	1	9.34594e-10	1	5.11402e-09
chr2	241098500	241115499	44	31	1.73479	0.576438	0.000223035	1	0.00204883	1
chr2	241198500	241202999	5	23	0.308407	3.24246	1	1.28861e-11	1	1.17981e-10
chr2	241376000	241383499	11	27	0.528698	1.89144	1	2.54724e-07	1	7.45971e-07
chr2	241529500	241538999	18	31	0.732468	1.36525	1	5.4974e-05	1	0.000102715
chr2	241588500	241599499	30	15	2.39016	0.418382	4.35973e-06	1	8.28799e-05	1
chr2	241986500	241990499	4	16	0.362832	2.75609	1	6.46891e-08	1	2.15756e-07
chr3	189000	195999	9	21	0.560741	1.78336	1	8.51554e-06	1	1.80793e-05
chr3	221000	225499	7	16	0.580532	1.72256	1	9.14606e-05	1	0.000165436
chr3	355000	358499	4	20	0.293721	3.40459	1	4.79237e-11	1	3.72195e-10
chr3	2096500	2112499	35	18	2.3374	0.427825	1.63351e-06	1	3.79616e-05	1
chr3	3150000	3154999	7	22	0.429089	2.33052	1	3.79105e-08	1	1.38708e-07
chr3	3307000	3309999	9	22	0.536361	1.86442	1	2.65297e-06	1	6.25263e-06
chr3	3569500	3573999	8	15	0.693917	1.4411	1	0.00113304	1	0.00178828
chr3	4859500	4881499	40	34	1.44511	0.691989	0.00985822	0.348364	0.0477497	0.429838
chr3	5093000	5100999	13	29	0.575694	1.73703	1	7.23724e-07	1	1.93734e-06
chr3	5339500	5349499	31	11	3.28968	0.303981	1.77462e-09	1	1.55062e-07	1
chr3	5514500	5522499	7	21	0.448593	2.22919	1	1.55672e-07	1	4.82157e-07
chr3	6376500	6383499	7	24	0.394762	2.53317	1	1.9888e-09	1	9.80806e-09
chr3	7209500	7215499	7	20	0.469954	2.12787	1	6.12245e-07	1	1.66203e-06
chr3	7703000	7718499	39	21	2.24296	0.445839	1.46208e-06	1	3.49086e-05	1
chr3	8448500	8454499	14	21	0.841111	1.1889	1	0.00324056	1	0.00488481
chr3	8624000	8631999	18	28	0.80824	1.23726	1	0.000567261	1	0.000927721
chr3	8808500	8816999	8	27	0.396524	2.52192	1	3.48023e-10	1	2.09434e-09
chr3	9026500	9039999	44	24	2.22053	0.450342	5.16969e-07	1	1.49259e-05	1
chr3	9114500	9119999	11	20	0.704931	1.41858	1	0.000390465	1	0.000650173
chr3	9179000	9191499	23	45	0.643633	1.55368	1	6.65513e-08	1	2.20568e-07
chr3	9307000	9310499	7	18	0.519423	1.92521	1	8.25769e-06	1	1.77319e-05
chr3	9350000	9359999	28	15	2.23595	0.447236	2.85048e-05	1	0.000383725	1
chr3	9697500	9721499	57	43	1.62615	0.61495	0.000208144	1	0.00194166	1
chr3	9748000	9754999	15	26	0.73104	1.36791	1	0.000163845	1	0.000286705
chr3	10098000	10106999	14	28	0.638084	1.56719	1	8.31492e-06	1	1.77444e-05
chr3	10145500	10150499	2	21	0.168222	5.94452	1	7.82307e-18	1	4.15841e-16
chr3	10332000	10337999	9	24	0.493452	2.02654	1	2.28095e-07	1	6.79646e-07
chr3	10354000	10365499	18	37	0.616815	1.62123	1	2.39824e-07	1	7.09426e-07
chr3	10489500	10496999	12	25	0.616815	1.62123	1	1.11497e-05	1	2.34315e-05
chr3	10712500	10717999	4	24	0.246726	4.05308	1	1.7005e-14	1	3.54175e-13
chr3	10892500	10902999	14	29	0.616815	1.62123	1	3.08892e-06	1	7.20778e-06
chr3	10943500	10946499	4	17	0.342675	2.91822	1	1.15242e-08	1	4.64503e-08
chr3	11065000	11075999	13	34	0.493452	2.02654	1	2.26057e-09	1	1.09558e-08
chr3	11187500	11201999	35	22	1.9309	0.517894	0.000101386	1	0.00106689	1
chr3	11295000	11307499	19	38	0.632631	1.5807	1	3.34216e-07	1	9.54788e-07
chr3	11334000	11342499	12	25	0.616815	1.62123	1	1.11497e-05	1	2.34315e-05
chr3	11491500	11499999	10	33	0.399116	2.50554	1	1.05305e-11	1	9.84275e-11
chr3	11584500	11609499	51	34	1.83282	0.545607	2.1352e-05	1	0.000303082	1
chr3	11683500	11692499	15	24	0.789523	1.26659	1	0.000821428	1	0.00131622
chr3	11823000	11829499	6	20	0.41121	2.43185	1	5.16103e-08	1	1.79719e-07
chr3	12059500	12071999	16	40	0.511505	1.95502	1	4.28209e-10	1	2.53406e-09
chr3	12163500	12168499	9	21	0.560741	1.78336	1	8.51554e-06	1	1.80793e-05
chr3	12214500	12220499	5	22	0.321816	3.10736	1	7.69089e-11	1	5.68127e-10
chr3	12423000	12439999	35	38	1.13874	0.878167	0.196168	0.0334568	0.656326	0.0465175
chr3	12451000	12458499	9	28	0.42539	2.35079	1	1.07981e-09	1	5.76108e-09
chr3	12767000	12779999	16	36	0.566803	1.76428	1	3.8516e-08	1	1.3837e-07
chr3	13216500	13224499	21	33	0.798231	1.25277	1	0.000187055	1	0.000325427
chr3	13257000	13264499	9	31	0.385509	2.59397	1	1.37017e-11	1	1.22833e-10
chr3	13368500	13376499	15	34	0.563945	1.77322	1	7.12729e-08	1	2.35251e-07
chr3	13620000	13626999	13	20	0.82242	1.21592	1	0.00290395	1	0.0043932
chr3	13860000	13864499	12	20	0.763676	1.30946	1	0.00114404	1	0.00180152
chr3	13875000	13882999	7	24	0.394762	2.53317	1	1.9888e-09	1	9.80806e-09
chr3	14210500	14215499	13	23	0.719617	1.38963	1	0.000255186	1	0.00043601
chr3	14263000	14265999	6	18	0.454495	2.20024	1	9.41891e-07	1	2.4466e-06
chr3	14280500	14283499	6	16	0.507965	1.96864	1	1.40929e-05	1	2.90453e-05
chr3	14469000	14471499	3	20	0.234977	4.25573	1	2.45907e-13	1	3.58742e-12
chr3	14628000	14631999	5	18	0.389567	2.56695	1	6.30488e-08	1	2.15095e-07
chr3	14744000	14752499	15	25	0.759157	1.31725	1	0.000373381	1	0.000624551
chr3	14852000	14857999	9	20	0.587443	1.70229	1	2.61943e-05	1	5.16771e-05
chr3	14869500	14877499	11	24	0.592142	1.68878	1	7.4206e-06	1	1.61342e-05
chr3	14885000	14891999	11	25	0.569368	1.75633	1	2.4997e-06	1	5.95027e-06
chr3	15031000	15052499	46	37	1.52581	0.655392	0.00243951	1	0.0146088	1
chr3	15093000	15098499	10	24	0.542797	1.84231	1	1.47395e-06	1	3.65464e-06
chr3	15351500	15365499	14	38	0.474473	2.1076	1	1.11656e-10	1	7.721e-10
chr3	15447000	15451499	12	23	0.668216	1.49652	1	7.99179e-05	1	0.000145792
chr3	15511000	15512999	10	16	0.798231	1.25277	1	0.00422323	1	0.0062905
chr3	15861500	15878999	25	56	0.562708	1.77712	1	1.8231e-11	1	1.51654e-10
chr3	15975000	15986499	35	20	2.11479	0.472859	1.53853e-05	1	0.000234577	1
chr3	16090000	16093999	6	19	0.43177	2.31605	1	2.25762e-07	1	6.81091e-07
chr3	16188000	16207499	44	28	1.91425	0.522397	2.35082e-05	1	0.000329175	1
chr3	16435000	16455499	42	33	1.56018	0.640952	0.00231359	1	0.0140119	1
chr3	16502500	16506499	8	19	0.555133	1.80137	1	1.55743e-05	1	3.18251e-05
chr3	16612000	16616499	6	20	0.41121	2.43185	1	5.16103e-08	1	1.79719e-07
chr3	16649500	16656999	8	25	0.427026	2.34178	1	6.38796e-09	1	2.8187e-08
chr3	16802000	16817999	46	20	2.76098	0.36219	3.85412e-10	1	4.76242e-08	1
chr3	17145000	17152499	17	25	0.854051	1.17089	1	0.00212165	1	0.00325296
chr3	17233000	17238999	7	23	0.41121	2.43185	1	8.85773e-09	1	3.73815e-08
chr3	17329000	17340999	31	23	1.64484	0.607962	0.00304903	1	0.0177987	1
chr3	17443000	17451499	9	27	0.440582	2.26972	1	4.33863e-09	1	1.94686e-08
chr3	17536500	17538999	3	15	0.308407	3.24246	1	7.32187e-09	1	3.14897e-08
chr3	17626500	17631999	6	17	0.479745	2.08444	1	3.73944e-06	1	8.62724e-06
chr3	17749500	17759499	33	18	2.20755	0.452991	1.0015e-05	1	0.000163944	1
chr3	18529500	18533499	4	20	0.293721	3.40459	1	4.79237e-11	1	3.72195e-10
chr3	18577500	18585499	6	31	0.269857	3.70567	1	3.30636e-16	1	1.10265e-14
chr3	19736500	19746999	33	17	2.33019	0.42915	3.10963e-06	1	6.38428e-05	1
chr3	20102500	20109499	11	27	0.528698	1.89144	1	2.54724e-07	1	7.45971e-07
chr3	20326000	20331999	11	17	0.82242	1.21592	1	0.0048555	1	0.00719987
chr3	20388500	20409999	44	26	2.05605	0.48637	3.97751e-06	1	7.82646e-05	1
chr3	20415000	20427999	35	13	3.17219	0.31524	6.54674e-10	1	7.17887e-08	1
chr3	20568000	20578999	29	13	2.64349	0.378287	7.23724e-07	1	1.9517e-05	1
chr3	21017000	21024499	8	30	0.358151	2.79212	1	3.42926e-12	1	3.57342e-11
chr3	22171500	22188999	35	27	1.5861	0.630479	0.00346923	1	0.0200047	1
chr3	22513000	22521999	13	27	0.616815	1.62123	1	5.86553e-06	1	1.29117e-05
chr3	23379500	23385999	7	17	0.54828	1.82389	1	2.82e-05	1	5.52913e-05
chr3	23843500	23850999	6	19	0.43177	2.31605	1	2.25762e-07	1	6.81091e-07
chr3	23884500	23890999	8	22	0.482725	2.07157	1	3.79773e-07	1	1.06771e-06
chr3	24117000	24122999	10	22	0.589997	1.69492	1	1.39527e-05	1	2.89419e-05
chr3	24211000	24215999	6	19	0.43177	2.31605	1	2.25762e-07	1	6.81091e-07
chr3	24521000	24527499	7	23	0.41121	2.43185	1	8.85773e-09	1	3.73815e-08
chr3	25508000	25535999	61	33	2.24956	0.444531	4.1262e-09	1	3.05007e-07	1
chr3	26045500	26055499	14	35	0.514012	1.94548	1	4.32263e-09	1	1.95237e-08
chr3	26367500	26375499	15	23	0.82242	1.21592	1	0.00174264	1	0.00268965
chr3	26499500	26503499	2	18	0.194784	5.1339	1	1.71564e-14	1	3.44335e-13
chr3	27067500	27090999	49	34	1.76233	0.567431	7.75473e-05	1	0.000859456	1
chr3	27368000	27374499	8	25	0.427026	2.34178	1	6.38796e-09	1	2.8187e-08
chr3	27985500	27993999	13	27	0.616815	1.62123	1	5.86553e-06	1	1.29117e-05
chr3	29057000	29064499	9	23	0.514012	1.94548	1	7.93376e-07	1	2.1049e-06
chr3	29144000	29149999	14	20	0.881164	1.13486	1	0.0065277	1	0.00955792
chr3	29339000	29346999	5	22	0.321816	3.10736	1	7.69089e-11	1	5.68127e-10
chr3	29453000	29457999	6	17	0.479745	2.08444	1	3.73944e-06	1	8.62724e-06
chr3	29641500	29654999	39	11	4.1121	0.243185	2.13743e-14	1	2.02238e-11	1
chr3	30495500	30501999	18	22	1.01909	0.981272	0.42218	0.025184	1	0.0352909
chr3	30796000	30803499	9	26	0.4569	2.18866	1	1.68458e-08	1	6.50877e-08
chr3	31174500	31186499	22	30	0.915274	1.09257	1	0.00291926	1	0.00441133
chr3	31292500	31297999	5	22	0.321816	3.10736	1	7.69089e-11	1	5.68127e-10
chr3	31418500	31426499	6	28	0.297773	3.35827	1	8.70002e-14	1	1.47295e-12
chr3	31502000	31506999	10	25	0.52192	1.916	1	4.5237e-07	1	1.24933e-06
chr3	31625000	31631499	5	22	0.321816	3.10736	1	7.69089e-11	1	5.68127e-10
chr3	31764500	31768999	7	21	0.448593	2.22919	1	1.55672e-07	1	4.82157e-07
chr3	32123000	32137499	16	46	0.446206	2.24111	1	2.50135e-13	1	3.56892e-12
chr3	32200500	32205499	10	19	0.678496	1.47385	1	0.000298339	1	0.000504457
chr3	32218000	32225999	13	28	0.595545	1.67913	1	2.09416e-06	1	5.09741e-06
chr3	32231000	32233999	5	17	0.41121	2.43185	1	2.99402e-07	1	8.66999e-07
chr3	32380000	32384499	6	24	0.345416	2.89506	1	9.1277e-11	1	6.3892e-10
chr3	32401500	32408499	15	28	0.680623	1.46924	1	2.85048e-05	1	5.56846e-05
chr3	32987500	32997999	10	42	0.31558	3.16877	1	7.33494e-18	1	4.02825e-16
chr3	33188500	33196999	5	27	0.264349	3.78287	1	6.89638e-15	1	1.59039e-13
chr3	33202500	33208999	12	25	0.616815	1.62123	1	1.11497e-05	1	2.34315e-05
chr3	33289500	33290999	0	14	0.082242	12.1592	1	1.53529e-14	1	3.30576e-13
chr3	33304500	33309999	10	21	0.616815	1.62123	1	4.04198e-05	1	7.75248e-05
chr3	33389500	33401999	30	16	2.24956	0.444531	1.49079e-05	1	0.000230051	1
chr3	33435500	33441499	26	13	2.37914	0.420319	1.58862e-05	1	0.000240663	1
chr3	33745500	33754999	14	29	0.616815	1.62123	1	3.08892e-06	1	7.20778e-06
chr3	34002000	34005999	4	18	0.324639	3.08034	1	1.94726e-09	1	9.78237e-09
chr3	34043500	34052999	8	25	0.427026	2.34178	1	6.38796e-09	1	2.8187e-08
chr3	34839500	34844999	6	20	0.41121	2.43185	1	5.16103e-08	1	1.79719e-07
chr3	35137500	35155499	36	23	1.90185	0.525805	0.000114343	1	0.00117559	1
chr3	36541000	36549499	26	17	1.85044	0.540411	0.00104899	1	0.00721459	1
chr3	37014500	37018499	5	18	0.389567	2.56695	1	6.30488e-08	1	2.15095e-07
chr3	37174500	37180999	7	23	0.41121	2.43185	1	8.85773e-09	1	3.73815e-08
chr3	37398500	37401499	3	16	0.290266	3.44512	1	1.03803e-09	1	5.62147e-09
chr3	37724500	37745999	59	34	2.11479	0.472859	6.08912e-08	1	2.80066e-06	1
chr3	37882500	37893499	31	15	2.46726	0.405308	1.62832e-06	1	3.82165e-05	1
chr3	38048000	38052499	12	18	0.844062	1.18475	1	0.00545338	1	0.00804608
chr3	38601000	38622999	59	38	1.89789	0.5269	2.07368e-06	1	4.67792e-05	1
chr3	38637000	38643499	7	27	0.352466	2.83716	1	1.79822e-11	1	1.50607e-10
chr3	38746500	38753499	10	23	0.565414	1.76862	1	4.62459e-06	1	1.04246e-05
chr3	38953000	38955499	5	16	0.435399	2.29675	1	1.34906e-06	1	3.41504e-06
chr3	39096000	39101499	13	27	0.616815	1.62123	1	5.86553e-06	1	1.29117e-05
chr3	39371500	39379999	16	30	0.676507	1.47818	1	1.49079e-05	1	3.05936e-05
chr3	39426500	39429499	8	16	0.653098	1.53116	1	0.00041937	1	0.000695785
chr3	40003000	40020999	40	21	2.29904	0.434965	5.97579e-07	1	1.66999e-05	1
chr3	40315000	40322999	11	27	0.528698	1.89144	1	2.54724e-07	1	7.45971e-07
chr3	40636000	40644499	20	36	0.700168	1.42823	1	6.61592e-06	1	1.44597e-05
chr3	40848500	40856999	13	24	0.690833	1.44753	1	0.000104907	1	0.0001884
chr3	41430500	41437999	9	21	0.560741	1.78336	1	8.51554e-06	1	1.80793e-05
chr3	41732500	41735499	9	15	0.771019	1.29699	1	0.00356505	1	0.00535008
chr3	41752000	41754999	3	18	0.259712	3.85043	1	1.76798e-11	1	1.51132e-10
chr3	42064500	42075999	17	38	0.569368	1.75633	1	2.07786e-08	1	7.92107e-08
chr3	42139000	42142999	7	22	0.429089	2.33052	1	3.79105e-08	1	1.38708e-07
chr3	42365000	42370999	8	26	0.41121	2.43185	1	1.51776e-09	1	7.80953e-09
chr3	42423500	42429999	15	26	0.73104	1.36791	1	0.000163845	1	0.000286705
chr3	42493500	42501499	8	23	0.462611	2.16164	1	1.01189e-07	1	3.25495e-07
[truncated: 13,407 more rows]

## Sheet: H3K14ac_SW1116
Chromosome	Start	End	KO	WT	FC_KO	FC_WT	P_KO	P_WT	FDR_KO	FDR_WT
chr1	1361000	1367999	30	9	1.71604	0.582736	0.000730501	1	0.00285147	1
chr1	1563000	1570999	35	6	2.84689	0.35126	1.34998e-09	1	2.49408e-08	1
chr1	2149000	2172999	93	36	1.40635	0.711062	0.000434421	1	0.00181749	1
chr1	3500500	3509499	38	13	1.54207	0.648481	0.00208101	1	0.00723165	1
chr1	3669500	3675999	29	6	2.37241	0.421512	1.26426e-06	1	1.04661e-05	1
chr1	3978500	3995999	66	26	1.37365	0.727985	0.00343283	1	0.0113458	1
chr1	4176500	4182999	28	8	1.7837	0.560632	0.000489714	1	0.0020215	1
chr1	4359000	4367999	39	9	2.21425	0.45162	4.84974e-07	1	4.53967e-06	1
chr1	5971500	5977499	29	6	2.37241	0.421512	1.26426e-06	1	1.04661e-05	1
chr1	6050500	6068499	57	22	1.39594	0.716363	0.00386846	1	0.0126218	1
chr1	6513000	6521999	40	12	1.74585	0.572787	0.000138962	1	0.000660154	1
chr1	6617000	6628999	49	12	2.12909	0.469685	1.37804e-07	1	1.52266e-06	1
chr1	6864000	6869999	27	6	2.21425	0.45162	9.69902e-06	1	6.25676e-05	1
chr1	8048000	8064999	52	12	2.25683	0.443099	9.6134e-09	1	1.41904e-07	1
chr1	9529500	9539999	36	8	2.27576	0.439414	5.08181e-07	1	4.62895e-06	1
chr1	9601500	9610999	45	8	2.82932	0.353442	3.14352e-11	1	9.31856e-10	1
chr1	10414000	10422499	36	10	1.86198	0.537062	6.17629e-05	1	0.000324709	1
chr1	10462500	10472499	44	11	2.07586	0.481728	8.97638e-07	1	7.86055e-06	1
chr1	11975000	11984499	39	13	1.58161	0.632269	0.00118641	1	0.00441837	1
chr1	12434500	12442999	40	8	2.52178	0.396545	8.64196e-09	1	1.2902e-07	1
chr1	12474000	12479499	33	5	3.13685	0.318791	1.70872e-10	1	4.14702e-09	1
chr1	13534500	13542499	40	6	3.24229	0.308424	2.14356e-12	1	8.64149e-11	1
chr1	14548500	14555999	30	8	1.90671	0.524462	0.000104544	1	0.000512902	1
chr1	14758500	14767999	6	25	0.149036	6.70979	1	6.5071e-05	1	0.0445953
chr1	15232500	15237499	29	1	8.30343	0.120432	3.33292e-26	1	2.99796e-23	1
chr1	15285500	15294499	33	8	2.09124	0.478186	8.25577e-06	1	5.50333e-05	1
chr1	15724500	15733999	50	14	1.88211	0.531318	4.56512e-06	1	3.25173e-05	1
chr1	16157000	16164999	34	4	3.87494	0.258069	1.01261e-13	1	6.24133e-12	1
chr1	16926500	16932999	32	8	2.02973	0.492677	1.98017e-05	1	0.00011867	1
chr1	17367000	17377999	45	7	3.18298	0.314171	3.90299e-13	1	1.91713e-11	1
chr1	17424000	17433999	36	13	1.46299	0.683534	0.0059706	1	0.0185291	1
chr1	17465000	17476999	43	12	1.8736	0.533733	1.67357e-05	1	0.000102146	1
chr1	17611500	17628499	64	19	1.79908	0.55584	2.00614e-06	1	1.58205e-05	1
chr1	17850000	17865499	46	18	1.36934	0.73028	0.00991475	1	0.0292494	1
chr1	17893000	17899499	34	4	3.87494	0.258069	1.01261e-13	1	6.24133e-12	1
chr1	18887500	18890999	30	6	2.45149	0.407915	4.35149e-07	1	4.18069e-06	1
chr1	19798500	19804999	29	4	3.32137	0.30108	2.08459e-10	1	4.7773e-09	1
chr1	20188000	20194499	30	7	2.14505	0.466189	9.25351e-06	1	6.04386e-05	1
chr1	21356500	21363499	29	9	1.66069	0.602161	0.00143473	1	0.00521893	1
chr1	21434000	21442499	32	6	2.60965	0.383193	4.70662e-08	1	5.9263e-07	1
chr1	22177000	22187999	44	7	3.11379	0.321152	1.43092e-12	1	5.9779e-11	1
chr1	22594500	22602999	38	11	1.79908	0.55584	9.55922e-05	1	0.000478194	1
chr1	23137500	23149999	42	6	3.40045	0.294078	1.37327e-13	1	7.79647e-12	1
chr1	24137500	24150999	60	11	2.81394	0.355373	1.0535e-13	1	6.16341e-12	1
chr1	24239000	24252499	47	17	1.47617	0.677431	0.00232547	1	0.00801249	1
chr1	24380500	24390499	37	8	2.33726	0.427851	1.9044e-07	1	1.94798e-06	1
chr1	25701000	25709499	36	13	1.46299	0.683534	0.0059706	1	0.0185291	1
chr1	25844500	25851999	34	10	1.76133	0.567751	0.000264113	1	0.00116993	1
chr1	26656500	26666499	42	4	4.76064	0.210056	1.23208e-19	1	2.64659e-17	1
chr1	26851000	26854999	25	3	3.59815	0.27792	1.65932e-10	1	4.11032e-09	1
chr1	27198000	27207499	37	12	1.61811	0.618007	0.000941251	1	0.00360087	1
chr1	28125500	28133999	32	10	1.66069	0.602161	0.00101649	1	0.00382667	1
chr1	28247500	28251999	24	5	2.30651	0.433556	9.18142e-06	1	6.04478e-05	1
chr1	28435000	28441999	33	10	1.71101	0.58445	0.000525164	1	0.00212996	1
chr1	28511500	28518999	29	2	5.53562	0.180648	6.26239e-18	1	1.03004e-15	1
chr1	28577500	28588499	37	13	1.50253	0.665546	0.00356666	1	0.0117088	1
chr1	28882000	28889499	35	5	3.32137	0.30108	1.08659e-11	1	3.47903e-10	1
chr1	29152000	29164499	48	9	2.71246	0.36867	4.64121e-11	1	1.2945e-09	1
chr1	29243000	29248999	28	7	2.00666	0.49834	5.60715e-05	1	0.000298274	1
chr1	30569500	30576999	35	8	2.21425	0.45162	1.32167e-06	1	1.07648e-05	1
chr1	31424500	31435499	42	6	3.40045	0.294078	1.37327e-13	1	7.79647e-12	1
chr1	31767500	31777499	42	15	1.4877	0.672179	0.00289696	1	0.00972205	1
chr1	32105000	32117999	50	15	1.76448	0.566739	2.70068e-05	1	0.000154822	1
chr1	32168000	32180999	45	13	1.81885	0.549799	2.56318e-05	1	0.000147853	1
chr1	32217500	32223999	27	6	2.21425	0.45162	9.69902e-06	1	6.25676e-05	1
chr1	32345000	32350999	32	7	2.28344	0.437935	1.35275e-06	1	1.08764e-05	1
chr1	32358000	32379499	70	25	1.51165	0.661528	0.00022897	1	0.00103741	1
chr1	33021500	33031999	40	10	2.06328	0.484666	2.50757e-06	1	1.93714e-05	1
chr1	33122500	33132999	36	13	1.46299	0.683534	0.0059706	1	0.0185291	1
chr1	33237500	33245999	39	13	1.58161	0.632269	0.00118641	1	0.00441837	1
chr1	33686000	33695499	36	11	1.70682	0.585886	0.000376341	1	0.00159467	1
chr1	33746000	33757499	44	15	1.55689	0.642305	0.00101398	1	0.00383729	1
chr1	33902500	33911999	37	8	2.33726	0.427851	1.9044e-07	1	1.94798e-06	1
chr1	34156000	34166499	37	14	1.40236	0.713085	0.0108758	1	0.0317721	1
chr1	34372000	34381999	39	9	2.21425	0.45162	4.84974e-07	1	4.53967e-06	1
chr1	34900500	34910499	38	10	1.96263	0.50952	1.30594e-05	1	8.1967e-05	1
chr1	35515500	35522999	36	9	2.04818	0.488238	7.03096e-06	1	4.79913e-05	1
chr1	36634000	36654999	80	24	1.79354	0.557556	2.13302e-07	1	2.14299e-06	1
chr1	36812500	36821499	34	12	1.49036	0.670979	0.0051377	1	0.0162313	1
chr1	37010500	37021499	47	10	2.41554	0.413985	3.85124e-09	1	6.27712e-08	1
chr1	37344000	37368499	88	29	1.64223	0.608926	2.58611e-06	1	1.98397e-05	1
chr1	38479500	38485999	27	9	1.54997	0.645172	0.00505203	1	0.0160275	1
chr1	38511500	38518999	31	4	3.5428	0.282263	1.07796e-11	1	3.55012e-10	1
chr1	39827000	39835499	36	13	1.46299	0.683534	0.0059706	1	0.0185291	1
chr1	39949000	39969499	65	16	2.14912	0.465306	2.37722e-09	1	4.18763e-08	1
chr1	40618000	40626499	36	10	1.86198	0.537062	6.17629e-05	1	0.000324709	1
chr1	40828500	40836499	38	10	1.96263	0.50952	1.30594e-05	1	8.1967e-05	1
chr1	41845500	41863499	73	14	2.73091	0.366179	3.11293e-15	1	2.80886e-13	1
chr1	42418000	42427499	37	8	2.33726	0.427851	1.9044e-07	1	1.94798e-06	1
chr1	43054000	43067499	50	14	1.88211	0.531318	4.56512e-06	1	3.25173e-05	1
chr1	43145000	43150999	32	9	1.82676	0.547419	0.000173504	1	0.000808899	1
chr1	43329000	43345499	54	17	1.69144	0.591212	4.9537e-05	1	0.000267669	1
chr1	43378500	43388499	42	8	2.6448	0.378101	9.77093e-10	1	1.85641e-08	1
chr1	43460500	43471499	47	15	1.66069	0.602161	0.000180508	1	0.000835195	1
chr1	44229000	44241499	51	13	2.05609	0.48636	2.65571e-07	1	2.63957e-06	1
chr1	45099500	45105499	31	7	2.21425	0.45162	3.59057e-06	1	2.60395e-05	1
chr1	45500000	45507999	36	3	5.12045	0.195295	5.37623e-19	1	1.1133e-16	1
chr1	45522500	45535499	45	15	1.59149	0.628341	0.000581837	1	0.00234527	1
chr1	46172500	46183999	46	18	1.36934	0.73028	0.00991475	1	0.0292494	1
chr1	46572000	46584499	41	13	1.66069	0.602161	0.000360341	1	0.00155224	1
chr1	47743500	47757999	54	14	2.02973	0.492677	2.14642e-07	1	2.15121e-06	1
chr1	48925500	48939499	48	16	1.59556	0.626738	0.000408369	1	0.00171423	1
chr1	50874000	50883999	35	12	1.53294	0.652341	0.00299113	1	0.00997414	1
chr1	52502500	52510999	32	8	2.02973	0.492677	1.98017e-05	1	0.00011867	1
chr1	52515500	52525499	35	9	1.99282	0.5018	1.63056e-05	1	0.000100201	1
chr1	52639500	52653999	51	14	1.91902	0.5211	2.18409e-06	1	1.70694e-05	1
chr1	53057000	53068499	40	12	1.74585	0.572787	0.000138962	1	0.000660154	1
chr1	53839000	53846999	30	4	3.43209	0.291368	4.81474e-11	1	1.31737e-09	1
chr1	55010000	55020499	42	12	1.83101	0.546146	3.46396e-05	1	0.000194892	1
chr1	55116500	55125499	32	8	2.02973	0.492677	1.98017e-05	1	0.00011867	1
chr1	55528000	55533499	26	8	1.66069	0.602161	0.00202197	1	0.00708551	1
chr1	57899500	57908999	40	11	1.89134	0.528726	2.20729e-05	1	0.000130461	1
chr1	57992500	57998499	27	5	2.58329	0.387103	3.27296e-07	1	3.20875e-06	1
chr1	58134000	58148499	49	11	2.30651	0.433556	1.02201e-08	1	1.49403e-07	1
chr1	58933000	58958999	90	32	1.52649	0.655098	3.32794e-05	1	0.0001879	1
chr1	59122500	59137499	52	19	1.46694	0.681691	0.00185214	1	0.00654937	1
chr1	59421000	59427999	29	10	1.50972	0.662377	0.00623225	1	0.0192271	1
chr1	60326500	60338499	41	11	1.93747	0.516138	1.02465e-05	1	6.53091e-05	1
chr1	60363000	60370499	27	6	2.21425	0.45162	9.69902e-06	1	6.25676e-05	1
chr1	60535500	60549999	56	22	1.37187	0.728931	0.00581773	1	0.0181782	1
chr1	60691000	60698999	36	14	1.36545	0.732357	0.0170023	1	0.0479094	1
chr1	61085000	61099999	58	14	2.17734	0.459275	7.64253e-09	1	1.17701e-07	1
chr1	62039000	62054499	55	12	2.38458	0.419362	5.69605e-10	1	1.18465e-08	1
chr1	62936000	62944999	43	16	1.43275	0.697959	0.00533619	1	0.0167682	1
chr1	62949000	62955499	28	8	1.7837	0.560632	0.000489714	1	0.0020215	1
chr1	62999000	63010999	54	21	1.38391	0.722593	0.00541914	1	0.0169844	1
chr1	63100000	63108499	32	11	1.5223	0.656902	0.00431081	1	0.0138686	1
chr1	63299000	63315499	56	14	2.10354	0.47539	4.18881e-08	1	5.34919e-07	1
chr1	64606500	64622999	60	18	1.77723	0.562675	5.32601e-06	1	3.74003e-05	1
chr1	64921000	64931999	38	13	1.54207	0.648481	0.00208101	1	0.00723165	1
chr1	65408500	65418499	36	8	2.27576	0.439414	5.08181e-07	1	4.62895e-06	1
chr1	65433500	65444499	37	10	1.91231	0.522929	2.87523e-05	1	0.000163526	1
chr1	66303500	66312499	40	11	1.89134	0.528726	2.20729e-05	1	0.000130461	1
chr1	67143500	67152999	39	13	1.58161	0.632269	0.00118641	1	0.00441837	1
chr1	69240000	69251499	36	12	1.57552	0.63471	0.00169855	1	0.00606365	1
chr1	70695000	70701999	30	5	2.86007	0.349642	8.59546e-09	1	1.3056e-07	1
chr1	73829500	73833499	26	7	1.86827	0.535254	0.000298849	1	0.00130196	1
chr1	74394000	74401999	33	3	4.70528	0.212527	1.59709e-16	1	1.87635e-14	1
chr1	74487000	74491499	26	5	2.49103	0.40144	1.03035e-06	1	8.90083e-06	1
chr1	75627500	75631499	25	8	1.59918	0.625321	0.0039101	1	0.0127346	1
chr1	77048500	77063999	48	15	1.69528	0.589872	9.76555e-05	1	0.000484557	1
chr1	77177000	77197499	65	24	1.4614	0.684273	0.000821207	1	0.00319212	1
chr1	78196000	78208499	44	17	1.38391	0.722593	0.00917477	1	0.0272929	1
chr1	78216500	78234499	61	23	1.43004	0.699283	0.00180106	1	0.0063821	1
chr1	80041500	80054499	41	16	1.36762	0.731195	0.0129734	1	0.0374324	1
chr1	81129500	81141499	39	5	3.69042	0.270972	3.19922e-14	1	2.26814e-12	1
chr1	81524500	81538499	45	14	1.69759	0.58907	0.000137025	1	0.000654734	1
chr1	81773500	81775999	24	4	2.76781	0.361296	1.9173e-07	1	1.93981e-06	1
chr1	82034000	82043999	35	10	1.81166	0.55198	0.000129375	1	0.000626817	1
chr1	83081500	83090999	36	13	1.46299	0.683534	0.0059706	1	0.0185291	1
chr1	83523000	83526999	25	3	3.59815	0.27792	1.65932e-10	1	4.11032e-09	1
chr1	83927000	83938999	44	12	1.91618	0.521872	7.91482e-06	1	5.33662e-05	1
chr1	83993500	84003499	37	7	2.62942	0.380312	6.77502e-09	1	1.05526e-07	1
chr1	84289500	84296999	31	5	2.95233	0.338715	2.39873e-09	1	4.1719e-08	1
chr1	84852500	84859999	36	12	1.57552	0.63471	0.00169855	1	0.00606365	1
chr1	85705000	85719499	47	18	1.39847	0.715066	0.00649096	1	0.0199696	1
chr1	87429000	87438999	40	11	1.89134	0.528726	2.20729e-05	1	0.000130461	1
chr1	87574500	87581499	28	5	2.67555	0.373755	1.00501e-07	1	1.12957e-06	1
chr1	87985000	87997999	56	19	1.57765	0.633853	0.000245582	1	0.00110089	1
chr1	88493500	88500999	36	8	2.27576	0.439414	5.08181e-07	1	4.62895e-06	1
chr1	88760500	88773499	40	12	1.74585	0.572787	0.000138962	1	0.000660154	1
chr1	89191000	89198999	37	14	1.40236	0.713085	0.0108758	1	0.0317721	1
chr1	89533000	89543499	39	9	2.21425	0.45162	4.84974e-07	1	4.53967e-06	1
chr1	89601500	89607999	36	12	1.57552	0.63471	0.00169855	1	0.00606365	1
chr1	90459000	90467999	38	11	1.79908	0.55584	9.55922e-05	1	0.000478194	1
chr1	93029000	93035499	30	2	5.72014	0.174821	7.26905e-19	1	1.453e-16	1
chr1	93649500	93660999	38	11	1.79908	0.55584	9.55922e-05	1	0.000478194	1
chr1	93810500	93820499	36	13	1.46299	0.683534	0.0059706	1	0.0185291	1
chr1	94963000	94974499	41	14	1.54997	0.645172	0.00145116	1	0.00524618	1
chr1	95253000	95263499	35	10	1.81166	0.55198	0.000129375	1	0.000626817	1
chr1	96937500	96947499	38	12	1.66069	0.602161	0.000509233	1	0.00208148	1
chr1	97811000	97823999	43	11	2.02973	0.492677	2.06541e-06	1	1.6239e-05	1
chr1	97909500	97924999	53	11	2.49103	0.40144	2.01022e-10	1	4.79389e-09	1
chr1	98394000	98400999	30	5	2.86007	0.349642	8.59546e-09	1	1.3056e-07	1
chr1	98953500	98963999	37	7	2.62942	0.380312	6.77502e-09	1	1.05526e-07	1
chr1	100611500	100614499	5	22	0.144408	6.92485	1	7.04152e-05	1	0.0422256
chr1	101365000	101374499	29	9	1.66069	0.602161	0.00143473	1	0.00521893	1
chr1	102521500	102531999	40	12	1.74585	0.572787	0.000138962	1	0.000660154	1
chr1	104560000	104570999	33	10	1.71101	0.58445	0.000525164	1	0.00212996	1
chr1	104685500	104696499	37	14	1.40236	0.713085	0.0108758	1	0.0317721	1
chr1	106049000	106055499	34	13	1.38391	0.722593	0.015564	1	0.044277	1
chr1	107236500	107247499	39	15	1.38391	0.722593	0.0119492	1	0.0346372	1
chr1	108532000	108539499	33	6	2.68873	0.371923	1.48152e-08	1	2.09348e-07	1
chr1	109542000	109551499	36	12	1.57552	0.63471	0.00169855	1	0.00606365	1
chr1	110179000	110192999	49	17	1.53767	0.650333	0.000847376	1	0.0032735	1
chr1	111652000	111664999	49	13	1.97701	0.505815	1.31555e-06	1	1.08005e-05	1
chr1	112135500	112146999	40	14	1.51307	0.660908	0.00248241	1	0.00845306	1
chr1	112454000	112462499	34	6	2.76781	0.361296	4.53392e-09	1	7.25024e-08	1
chr1	112703000	112714499	64	19	1.79908	0.55584	2.00614e-06	1	1.58205e-05	1
chr1	113289500	113298999	38	7	2.69862	0.37056	2.17177e-09	1	3.8564e-08	1
chr1	113386500	113397499	39	9	2.21425	0.45162	4.84974e-07	1	4.53967e-06	1
chr1	114446000	114458499	43	15	1.5223	0.656902	0.00173164	1	0.00615048	1
chr1	114778500	114797999	56	23	1.31471	0.760624	0.0131287	1	0.0378387	1
chr1	115707500	115721499	43	8	2.7063	0.369508	3.17608e-10	1	7.08685e-09	1
chr1	115869000	115878499	32	11	1.5223	0.656902	0.00431081	1	0.0138686	1
chr1	116392000	116412999	67	21	1.71101	0.58445	6.98175e-06	1	4.79053e-05	1
chr1	116451000	116463999	38	9	2.15889	0.4632	1.21188e-06	1	1.02086e-05	1
chr1	116667000	116670999	31	7	2.21425	0.45162	3.59057e-06	1	2.60395e-05	1
chr1	116925000	116931999	41	10	2.1136	0.473126	1.06115e-06	1	9.07429e-06	1
chr1	117234500	117241499	31	10	1.61036	0.620978	0.00191403	1	0.0067376	1
chr1	117446500	117452999	28	9	1.60533	0.622925	0.00273419	1	0.00923287	1
chr1	117617500	117629999	48	17	1.50692	0.663605	0.00141685	1	0.00517742	1
chr1	117635500	117639499	24	1	6.91953	0.144519	2.99801e-20	1	7.07334e-18	1
chr1	147197000	147202499	27	6	2.21425	0.45162	9.69902e-06	1	6.25676e-05	1
chr1	147893500	147912999	73	26	1.51717	0.659122	0.000162022	1	0.000761906	1
chr1	148392000	148393999	20	1	5.8124	0.172046	8.66318e-16	1	8.84258e-14	1
chr1	150346000	150354499	31	10	1.61036	0.620978	0.00191403	1	0.0067376	1
chr1	150408000	150417499	34	11	1.61456	0.619365	0.00134145	1	0.00493764	1
chr1	150795000	150808499	58	18	1.71896	0.581748	1.9082e-05	1	0.000115366	1
chr1	152092000	152108499	60	10	3.06975	0.325759	1.83798e-15	1	1.70111e-13	1
chr1	152512000	152517499	27	6	2.21425	0.45162	9.69902e-06	1	6.25676e-05	1
chr1	153390000	153402999	49	16	1.62812	0.614204	0.000230583	1	0.00103721	1
chr1	154604500	154614999	45	10	2.3149	0.431985	2.72704e-08	1	3.57121e-07	1
chr1	154873000	154877499	26	4	2.98924	0.334534	1.38957e-08	1	1.99787e-07	1
chr1	156011500	156016499	25	3	3.59815	0.27792	1.65932e-10	1	4.11032e-09	1
chr1	156765500	156772999	33	6	2.68873	0.371923	1.48152e-08	1	2.09348e-07	1
chr1	156852000	156864999	45	17	1.41466	0.706884	0.00591915	1	0.018451	1
chr1	157127000	157137499	41	15	1.4531	0.688183	0.00474618	1	0.0151541	1
chr1	157165000	157192499	84	36	1.2717	0.786351	0.0100039	1	0.0294581	1
chr1	157498000	157508499	34	11	1.61456	0.619365	0.00134145	1	0.00493764	1
chr1	157983000	157993999	42	16	1.40019	0.71419	0.00840617	1	0.0252308	1
chr1	159374000	159382999	33	6	2.68873	0.371923	1.48152e-08	1	2.09348e-07	1
chr1	159789500	159804499	59	17	1.84521	0.541944	1.89228e-06	1	1.49471e-05	1
chr1	160068000	160073499	29	4	3.32137	0.30108	2.08459e-10	1	4.7773e-09	1
chr1	160288500	160297499	40	6	3.24229	0.308424	2.14356e-12	1	8.64149e-11	1
chr1	160728000	160734999	30	10	1.56004	0.64101	0.00350392	1	0.0115569	1
chr1	160986000	160993499	37	10	1.91231	0.522929	2.87523e-05	1	0.000163526	1
chr1	161081000	161089499	33	8	2.09124	0.478186	8.25577e-06	1	5.50333e-05	1
chr1	162101500	162116499	52	19	1.46694	0.681691	0.00185214	1	0.00654937	1
chr1	162128000	162138499	45	14	1.69759	0.58907	0.000137025	1	0.000654734	1
chr1	164436000	164446999	41	13	1.66069	0.602161	0.000360341	1	0.00155224	1
chr1	165423000	165430999	45	7	3.18298	0.314171	3.90299e-13	1	1.91713e-11	1
chr1	165765500	165772499	32	8	2.02973	0.492677	1.98017e-05	1	0.00011867	1
chr1	166572500	166581499	37	8	2.33726	0.427851	1.9044e-07	1	1.94798e-06	1
chr1	166869500	166879499	42	6	3.40045	0.294078	1.37327e-13	1	7.79647e-12	1
chr1	167154500	167164999	37	10	1.91231	0.522929	2.87523e-05	1	0.000163526	1
chr1	168029500	168038499	31	11	1.47617	0.677431	0.00742305	1	0.0225433	1
chr1	168115000	168126999	39	11	1.84521	0.541944	4.6474e-05	1	0.000252112	1
chr1	169611500	169619999	38	8	2.39877	0.41688	6.95992e-08	1	8.22053e-07	1
chr1	171176000	171182999	27	8	1.72219	0.580655	0.00101134	1	0.00383991	1
chr1	171197500	171208499	38	11	1.79908	0.55584	9.55922e-05	1	0.000478194	1
chr1	171254000	171268999	53	17	1.66069	0.602161	9.05262e-05	1	0.000456421	1
chr1	171382000	171393499	41	10	2.1136	0.473126	1.06115e-06	1	9.07429e-06	1
chr1	171486500	171497499	35	6	2.84689	0.35126	1.34998e-09	1	2.49408e-08	1
chr1	173218500	173226999	31	4	3.5428	0.282263	1.07796e-11	1	3.55012e-10	1
chr1	173549500	173560999	47	19	1.32855	0.752701	0.0157278	1	0.0445317	1
chr1	174414500	174421999	32	10	1.66069	0.602161	0.00101649	1	0.00382667	1
chr1	174565000	174572999	28	8	1.7837	0.560632	0.000489714	1	0.0020215	1
chr1	176511500	176520499	38	6	3.08413	0.32424	3.04371e-11	1	9.17385e-10	1
chr1	176563000	176572999	37	12	1.61811	0.618007	0.000941251	1	0.00360087	1
chr1	177471500	177479999	35	11	1.66069	0.602161	0.000719594	1	0.00282884	1
chr1	177883000	177886499	25	4	2.87852	0.3474	5.25709e-08	1	6.48886e-07	1
chr1	178399000	178409999	39	9	2.21425	0.45162	4.84974e-07	1	4.53967e-06	1
chr1	178465000	178472499	36	9	2.04818	0.488238	7.03096e-06	1	4.79913e-05	1
chr1	178607500	178616999	36	6	2.92597	0.341767	3.91358e-10	1	8.54693e-09	1
chr1	178621000	178630999	40	10	2.06328	0.484666	2.50757e-06	1	1.93714e-05	1
chr1	179546000	179552999	33	10	1.71101	0.58445	0.000525164	1	0.00212996	1
chr1	179776500	179786999	44	12	1.91618	0.521872	7.91482e-06	1	5.33662e-05	1
chr1	180178500	180187499	41	14	1.54997	0.645172	0.00145116	1	0.00524618	1
chr1	180565500	180571499	28	8	1.7837	0.560632	0.000489714	1	0.0020215	1
chr1	180900000	180907999	38	8	2.39877	0.41688	6.95992e-08	1	8.22053e-07	1
chr1	181115000	181123999	36	12	1.57552	0.63471	0.00169855	1	0.00606365	1
chr1	181250500	181273499	76	21	1.93747	0.516138	1.71573e-08	1	2.38347e-07	1
chr1	181425000	181438499	44	15	1.55689	0.642305	0.00101398	1	0.00383729	1
chr1	181570500	181580999	40	11	1.89134	0.528726	2.20729e-05	1	0.000130461	1
chr1	182487500	182496499	28	9	1.60533	0.622925	0.00273419	1	0.00923287	1
chr1	182590000	182597999	35	6	2.84689	0.35126	1.34998e-09	1	2.49408e-08	1
chr1	182761500	182772999	34	13	1.38391	0.722593	0.015564	1	0.044277	1
chr1	182786500	182799499	48	18	1.42761	0.700472	0.00417158	1	0.0134764	1
chr1	183196500	183205499	49	10	2.51619	0.397426	5.01969e-10	1	1.05465e-08	1
chr1	183796000	183806999	38	13	1.54207	0.648481	0.00208101	1	0.00723165	1
chr1	183880500	183892499	41	10	2.1136	0.473126	1.06115e-06	1	9.07429e-06	1
chr1	183927500	183934499	37	11	1.75295	0.570468	0.000191993	1	0.000881814	1
chr1	184019000	184031499	56	17	1.75295	0.570468	1.40988e-05	1	8.74044e-05	1
chr1	184043000	184052499	34	7	2.42183	0.41291	1.76311e-07	1	1.85691e-06	1
chr1	184074500	184087999	48	14	1.8083	0.553005	1.88591e-05	1	0.000114282	1
chr1	184541000	184553999	44	10	2.26457	0.441584	7.03476e-08	1	8.18135e-07	1
chr1	184887500	184903499	58	15	2.04126	0.489893	7.741e-08	1	8.84545e-07	1
chr1	185039500	185046499	28	8	1.7837	0.560632	0.000489714	1	0.0020215	1
chr1	185061000	185069499	32	9	1.82676	0.547419	0.000173504	1	0.000808899	1
chr1	186674000	186679499	28	5	2.67555	0.373755	1.00501e-07	1	1.12957e-06	1
chr1	186775000	186787999	45	17	1.41466	0.706884	0.00591915	1	0.018451	1
chr1	187462500	187486999	73	26	1.51717	0.659122	0.000162022	1	0.000761906	1
chr1	189831500	189837499	25	6	2.05609	0.48636	6.5071e-05	1	0.000339435	1
chr1	189976500	189986499	36	8	2.27576	0.439414	5.08181e-07	1	4.62895e-06	1
chr1	192323500	192330499	31	9	1.7714	0.564525	0.000361158	1	0.0015442	1
chr1	192726000	192735499	38	11	1.79908	0.55584	9.55922e-05	1	0.000478194	1
chr1	192742500	192748999	33	7	2.35264	0.425054	4.9524e-07	1	4.57771e-06	1
chr1	193504000	193517999	55	11	2.58329	0.387103	2.52884e-11	1	7.78503e-10	1
chr1	195979500	195985999	34	3	4.84367	0.206455	2.46063e-17	1	3.63214e-15	1
chr1	196209000	196216499	33	10	1.71101	0.58445	0.000525164	1	0.00212996	1
chr1	196383500	196390999	29	9	1.66069	0.602161	0.00143473	1	0.00521893	1
chr1	197572000	197585499	44	10	2.26457	0.441584	7.03476e-08	1	8.18135e-07	1
chr1	200169500	200174999	33	7	2.35264	0.425054	4.9524e-07	1	4.57771e-06	1
chr1	200549000	200553499	27	9	1.54997	0.645172	0.00505203	1	0.0160275	1
chr1	200651500	200659999	33	9	1.88211	0.531318	8.10515e-05	1	0.000412991	1
chr1	201430500	201452499	71	27	1.42345	0.702521	0.00109625	1	0.00410544	1
chr1	201505000	201520499	57	16	1.88862	0.529486	1.25214e-06	1	1.04438e-05	1
chr1	201576500	201584499	32	7	2.28344	0.437935	1.35275e-06	1	1.08764e-05	1
chr1	202054000	202075499	71	20	1.89793	0.52689	9.54343e-08	1	1.08662e-06	1
chr1	202300500	202314999	56	11	2.62942	0.380312	8.73812e-12	1	2.98715e-10	1
chr1	202329500	202337499	34	7	2.42183	0.41291	1.76311e-07	1	1.85691e-06	1
chr1	202666500	202677999	39	9	2.21425	0.45162	4.84974e-07	1	4.53967e-06	1
chr1	202696500	202706999	58	16	1.92119	0.520512	6.04379e-07	1	5.41439e-06	1
chr1	204086000	204093999	32	6	2.60965	0.383193	4.70662e-08	1	5.9263e-07	1
chr1	204158500	204166499	33	9	1.88211	0.531318	8.10515e-05	1	0.000412991	1
chr1	204375000	204386999	48	12	2.0865	0.479271	3.22339e-07	1	3.17529e-06	1
chr1	204629500	204638999	41	8	2.58329	0.387103	2.93932e-09	1	4.99737e-08	1
chr1	204739500	204745999	30	7	2.14505	0.466189	9.25351e-06	1	6.04386e-05	1
chr1	204837500	204847999	40	13	1.62115	0.616847	0.000661184	1	0.00263266	1
chr1	205032000	205041999	44	13	1.77931	0.562016	5.12214e-05	1	0.000275426	1
chr1	205221000	205230499	43	16	1.43275	0.697959	0.00533619	1	0.0167682	1
chr1	205271500	205277999	30	11	1.43004	0.699283	0.0124349	1	0.0359616	1
chr1	205355000	205362499	34	5	3.22911	0.309683	4.3688e-11	1	1.24754e-09	1
chr1	206660000	206666499	33	5	3.13685	0.318791	1.70872e-10	1	4.14702e-09	1
chr1	206711500	206719999	37	13	1.50253	0.665546	0.00356666	1	0.0117088	1
chr1	206743000	206746999	29	3	4.15172	0.240864	2.10964e-13	1	1.10207e-11	1
chr1	207095000	207096499	2	16	0.0976875	10.2367	1	2.88043e-07	1	0.000376865
chr1	207102500	207112999	44	15	1.55689	0.642305	0.00101398	1	0.00383729	1
chr1	207160500	207167499	28	7	2.00666	0.49834	5.60715e-05	1	0.000298274	1
chr1	207608000	207620499	49	12	2.12909	0.469685	1.37804e-07	1	1.52266e-06	1
chr1	207820500	207830999	38	12	1.66069	0.602161	0.000509233	1	0.00208148	1
chr1	207882000	207888499	31	7	2.21425	0.45162	3.59057e-06	1	2.60395e-05	1
chr1	208105500	208112999	31	9	1.7714	0.564525	0.000361158	1	0.0015442	1
chr1	208712000	208719499	32	11	1.5223	0.656902	0.00431081	1	0.0138686	1
chr1	209036500	209046499	36	14	1.36545	0.732357	0.0170023	1	0.0479094	1
chr1	209305000	209317999	46	14	1.7345	0.576537	7.21563e-05	1	0.000371348	1
chr1	209479000	209487999	32	12	1.4052	0.711644	0.0140392	1	0.0402536	1
chr1	209684000	209695499	44	2	8.30343	0.120432	3.10753e-33	1	8.94471e-30	1
chr1	210273500	210283999	29	7	2.07586	0.481728	2.31362e-05	1	0.000135301	1
chr1	210493500	210504999	43	11	2.02973	0.492677	2.06541e-06	1	1.6239e-05	1
chr1	210622000	210631999	38	12	1.66069	0.602161	0.000509233	1	0.00208148	1
chr1	210895000	210904499	45	7	3.18298	0.314171	3.90299e-13	1	1.91713e-11	1
chr1	211555500	211564999	39	12	1.70327	0.587107	0.0002691	1	0.00118491	1
chr1	212442000	212451999	39	15	1.38391	0.722593	0.0119492	1	0.0346372	1
chr1	212728000	212734499	36	10	1.86198	0.537062	6.17629e-05	1	0.000324709	1
chr1	213572000	213581999	38	14	1.43926	0.694801	0.00679838	1	0.0208109	1
chr1	213613000	213619999	30	5	2.86007	0.349642	8.59546e-09	1	1.3056e-07	1
chr1	213920000	213935499	42	14	1.58688	0.630168	0.000830177	1	0.00321829	1
chr1	214000000	214009999	38	10	1.96263	0.50952	1.30594e-05	1	8.1967e-05	1
chr1	218184500	218195999	35	9	1.99282	0.5018	1.63056e-05	1	0.000100201	1
chr1	219574000	219580499	33	10	1.71101	0.58445	0.000525164	1	0.00212996	1
chr1	219858500	219864499	29	9	1.66069	0.602161	0.00143473	1	0.00521893	1
chr1	219906500	219914499	41	11	1.93747	0.516138	1.02465e-05	1	6.53091e-05	1
chr1	220323500	220332499	39	7	2.76781	0.361296	6.79214e-10	1	1.3446e-08	1
chr1	220562000	220566499	26	6	2.13517	0.468347	2.55602e-05	1	0.000148212	1
chr1	221778000	221784999	37	6	3.00505	0.332773	1.10537e-10	1	2.83069e-09	1
chr1	222089000	222099999	43	9	2.43567	0.410564	9.85596e-09	1	1.45038e-07	1
chr1	222232000	222235999	25	7	1.79908	0.55584	0.000655946	1	0.00262598	1
chr1	222618000	222630499	51	14	1.91902	0.5211	2.18409e-06	1	1.70694e-05	1
chr1	223333500	223340999	31	7	2.21425	0.45162	3.59057e-06	1	2.60395e-05	1
chr1	224760500	224774499	54	18	1.60242	0.624057	0.00020192	1	0.000918902	1
chr1	225582000	225592999	38	8	2.39877	0.41688	6.95992e-08	1	8.22053e-07	1
chr1	225620000	225635499	53	20	1.42345	0.702521	0.00325301	1	0.0108061	1
chr1	225737000	225745499	44	8	2.76781	0.361296	1.01e-10	1	2.61907e-09	1
chr1	226369000	226374499	29	2	5.53562	0.180648	6.26239e-18	1	1.03004e-15	1
chr1	226601500	226612499	39	13	1.58161	0.632269	0.00118641	1	0.00441837	1
chr1	226827000	226836999	49	7	3.45976	0.289037	1.75614e-15	1	1.65734e-13	1
chr1	227322000	227332499	41	14	1.54997	0.645172	0.00145116	1	0.00524618	1
chr1	229184000	229193499	34	5	3.22911	0.309683	4.3688e-11	1	1.24754e-09	1
chr1	229695000	229701499	33	8	2.09124	0.478186	8.25577e-06	1	5.50333e-05	1
chr1	230028500	230038999	38	13	1.54207	0.648481	0.00208101	1	0.00723165	1
chr1	230287000	230292499	28	6	2.29333	0.436047	3.55909e-06	1	2.61606e-05	1
chr1	230838000	230843499	29	3	4.15172	0.240864	2.10964e-13	1	1.10207e-11	1
chr1	231786500	231796499	32	7	2.28344	0.437935	1.35275e-06	1	1.08764e-05	1
chr1	232240000	232247999	32	4	3.65351	0.273709	2.34159e-12	1	9.12049e-11	1
chr1	232719000	232727999	31	7	2.21425	0.45162	3.59057e-06	1	2.60395e-05	1
chr1	233434000	233440499	31	7	2.21425	0.45162	3.59057e-06	1	2.60395e-05	1
chr1	233645000	233655499	46	9	2.60174	0.384358	4.21117e-10	1	9.00553e-09	1
chr1	234228500	234246499	57	14	2.14044	0.467194	1.8041e-08	1	2.499e-07	1
chr1	234909500	234928999	67	21	1.71101	0.58445	6.98175e-06	1	4.79053e-05	1
chr1	235510000	235518499	40	8	2.52178	0.396545	8.64196e-09	1	1.2902e-07	1
chr1	235683500	235691999	33	9	1.88211	0.531318	8.10515e-05	1	0.000412991	1
chr1	236280000	236287999	38	14	1.43926	0.694801	0.00679838	1	0.0208109	1
chr1	236745000	236753999	32	7	2.28344	0.437935	1.35275e-06	1	1.08764e-05	1
chr1	236903000	236916499	42	15	1.4877	0.672179	0.00289696	1	0.00972205	1
chr1	237672000	237679999	32	7	2.28344	0.437935	1.35275e-06	1	1.08764e-05	1
chr1	237930000	237944499	42	11	1.9836	0.504134	4.65116e-06	1	3.29103e-05	1
chr1	241906000	241918999	44	9	2.49103	0.40144	3.51957e-09	1	5.91403e-08	1
chr1	242490500	242499999	34	6	2.76781	0.361296	4.53392e-09	1	7.25024e-08	1
chr1	242622000	242633999	41	9	2.32496	0.430115	7.23576e-08	1	8.32431e-07	1
chr1	244058000	244071499	57	18	1.68982	0.591778	3.52691e-05	1	0.000197738	1
chr1	244136000	244145499	47	17	1.47617	0.677431	0.00232547	1	0.00801249	1
chr1	244338500	244344999	33	6	2.68873	0.371923	1.48152e-08	1	2.09348e-07	1
chr1	244773500	244778499	24	6	1.97701	0.505815	0.000159848	1	0.000753409	1
chr1	244927500	244938999	39	5	3.69042	0.270972	3.19922e-14	1	2.26814e-12	1
chr1	245497500	245506999	33	11	1.56843	0.637582	0.00243675	1	0.0083539	1
chr1	245788000	245795999	34	11	1.61456	0.619365	0.00134145	1	0.00493764	1
chr1	247484500	247494999	41	15	1.4531	0.688183	0.00474618	1	0.0151541	1
chr1	247618500	247627499	31	8	1.96822	0.508073	4.61663e-05	1	0.000252537	1
chr1	248278500	248282999	25	5	2.39877	0.41688	3.13194e-06	1	2.34826e-05	1
chr2	374000	386499	44	13	1.77931	0.562016	5.12214e-05	1	0.000275426	1
chr2	1322000	1339999	54	16	1.79094	0.558367	1.00817e-05	1	6.46309e-05	1
chr2	1541000	1549999	34	4	3.87494	0.258069	1.01261e-13	1	6.24133e-12	1
chr2	2747000	2753999	29	4	3.32137	0.30108	2.08459e-10	1	4.7773e-09	1
chr2	3127000	3133499	33	12	1.44778	0.690714	0.00860346	1	0.0257344	1
chr2	3174500	3182999	40	11	1.89134	0.528726	2.20729e-05	1	0.000130461	1
chr2	3304500	3313999	49	10	2.51619	0.397426	5.01969e-10	1	1.05465e-08	1
chr2	3516000	3523499	32	4	3.65351	0.273709	2.34159e-12	1	9.12049e-11	1
chr2	3982000	3986999	4	20	0.131801	7.58722	1	2.28589e-05	1	0.017783
chr2	5490500	5494499	22	3	3.18298	0.314171	1.67717e-08	1	2.33781e-07	1
chr2	5670000	5678999	33	8	2.09124	0.478186	8.25577e-06	1	5.50333e-05	1
chr2	6089500	6102499	40	14	1.51307	0.660908	0.00248241	1	0.00845306	1
chr2	6630000	6639999	35	9	1.99282	0.5018	1.63056e-05	1	0.000100201	1
chr2	7015500	7026999	41	15	1.4531	0.688183	0.00474618	1	0.0151541	1
chr2	7047000	7053999	31	8	1.96822	0.508073	4.61663e-05	1	0.000252537	1
chr2	8471000	8475499	31	7	2.21425	0.45162	3.59057e-06	1	2.60395e-05	1
chr2	9165500	9171499	29	2	5.53562	0.180648	6.26239e-18	1	1.03004e-15	1
chr2	9385000	9389499	28	4	3.21066	0.311462	8.74029e-10	1	1.68507e-08	1
chr2	10139000	10142999	26	6	2.13517	0.468347	2.55602e-05	1	0.000148212	1
chr2	10292500	10302999	39	8	2.46028	0.406458	2.48204e-08	1	3.31214e-07	1
chr2	10419500	10427499	29	8	1.84521	0.541944	0.000229768	1	0.00103743	1
chr2	10461000	10467999	35	9	1.99282	0.5018	1.63056e-05	1	0.000100201	1
chr2	10570000	10587999	63	14	2.36187	0.423394	8.20307e-11	1	2.13681e-09	1
chr2	10704000	10713999	35	10	1.81166	0.55198	0.000129375	1	0.000626817	1
chr2	11111500	11117999	30	4	3.43209	0.291368	4.81474e-11	1	1.31737e-09	1
chr2	12091000	12099999	34	13	1.38391	0.722593	0.015564	1	0.044277	1
chr2	12439000	12450999	51	14	1.91902	0.5211	2.18409e-06	1	1.70694e-05	1
chr2	14214500	14226999	39	9	2.21425	0.45162	4.84974e-07	1	4.53967e-06	1
chr2	14980000	14989999	33	8	2.09124	0.478186	8.25577e-06	1	5.50333e-05	1
chr2	15481000	15488499	33	6	2.68873	0.371923	1.48152e-08	1	2.09348e-07	1
chr2	15558500	15563999	28	2	5.3511	0.186877	5.22259e-17	1	7.26218e-15	1
chr2	15775500	15786499	47	18	1.39847	0.715066	0.00649096	1	0.0199696	1
chr2	16201000	16208999	31	5	2.95233	0.338715	2.39873e-09	1	4.1719e-08	1
chr2	16556500	16565499	32	9	1.82676	0.547419	0.000173504	1	0.000808899	1
chr2	17170500	17178499	30	9	1.71604	0.582736	0.000730501	1	0.00285147	1
chr2	19357500	19375499	54	13	2.17471	0.459832	2.10058e-08	1	2.85338e-07	1
chr2	19474500	19481499	36	3	5.12045	0.195295	5.37623e-19	1	1.1133e-16	1
chr2	19874000	19883999	43	13	1.73977	0.57479	0.000100256	1	0.000495069	1
chr2	19917500	19928499	44	14	1.66069	0.602161	0.00025501	1	0.00113767	1
chr2	20070000	20078999	42	8	2.6448	0.378101	9.77093e-10	1	1.85641e-08	1
chr2	20082500	20088999	34	7	2.42183	0.41291	1.76311e-07	1	1.85691e-06	1
chr2	20833000	20842999	44	6	3.55861	0.281008	8.03667e-15	1	6.26904e-13	1
chr2	21274000	21281999	47	6	3.79586	0.263445	9.6824e-17	1	1.2554e-14	1
chr2	21412000	21419499	32	5	3.04459	0.328451	6.49619e-10	1	1.32426e-08	1
chr2	23097000	23108499	38	11	1.79908	0.55584	9.55922e-05	1	0.000478194	1
chr2	23315000	23333499	68	25	1.46907	0.680703	0.000582686	1	0.00234574	1
chr2	23339000	23350499	39	10	2.01295	0.496782	5.79039e-06	1	4.03365e-05	1
chr2	23512000	23522499	43	14	1.62378	0.615846	0.000464943	1	0.00193423	1
chr2	25085000	25090999	32	9	1.82676	0.547419	0.000173504	1	0.000808899	1
chr2	25930500	25940999	39	7	2.76781	0.361296	6.79214e-10	1	1.3446e-08	1
chr2	26058000	26069499	47	12	2.04392	0.489255	7.39459e-07	1	6.55717e-06	1
chr2	26128000	26136499	36	12	1.57552	0.63471	0.00169855	1	0.00606365	1
chr2	26429500	26436999	35	10	1.81166	0.55198	0.000129375	1	0.000626817	1
chr2	26572000	26579999	36	11	1.70682	0.585886	0.000376341	1	0.00159467	1
chr2	26684000	26693499	40	12	1.74585	0.572787	0.000138962	1	0.000660154	1
chr2	27675500	27682999	30	5	2.86007	0.349642	8.59546e-09	1	1.3056e-07	1
chr2	28777500	28780999	26	5	2.49103	0.40144	1.03035e-06	1	8.90083e-06	1
chr2	29366500	29374499	34	6	2.76781	0.361296	4.53392e-09	1	7.25024e-08	1
chr2	29711000	29719999	45	7	3.18298	0.314171	3.90299e-13	1	1.91713e-11	1
chr2	29770500	29782999	53	13	2.13517	0.468347	4.98162e-08	1	6.18865e-07	1
chr2	29812500	29832499	73	29	1.36545	0.732357	0.00280527	1	0.00944298	1
chr2	30296500	30302999	33	12	1.44778	0.690714	0.00860346	1	0.0257344	1
chr2	30577500	30582999	29	5	2.76781	0.361296	2.98632e-08	1	3.86155e-07	1
chr2	31123500	31133999	40	6	3.24229	0.308424	2.14356e-12	1	8.64149e-11	1
chr2	31353500	31372999	59	19	1.66069	0.602161	4.54646e-05	1	0.000250221	1
chr2	32197000	32204499	34	6	2.76781	0.361296	4.53392e-09	1	7.25024e-08	1
chr2	33321500	33323499	23	4	2.6571	0.37635	6.73189e-07	1	6.00839e-06	1
chr2	36075500	36096999	75	28	1.45071	0.689315	0.000510591	1	0.00208023	1
chr2	38153500	38164499	43	17	1.35315	0.739015	0.0139453	1	0.040096	1
chr2	38788500	38799499	39	12	1.70327	0.587107	0.0002691	1	0.00118491	1
chr2	39134000	39143999	33	8	2.09124	0.478186	8.25577e-06	1	5.50333e-05	1
chr2	39185500	39203999	72	18	2.12684	0.47018	7.23787e-10	1	1.41724e-08	1
chr2	39466500	39477499	43	6	3.47953	0.287395	3.35908e-14	1	2.32983e-12	1
chr2	40118000	40122499	21	4	2.43567	0.410564	7.36221e-06	1	4.98973e-05	1
chr2	41664000	41675999	48	13	1.93747	0.516138	2.8462e-06	1	2.1725e-05	1
chr2	41720500	41728999	38	5	3.59815	0.27792	1.42662e-13	1	7.83659e-12	1
chr2	41782000	41792499	41	16	1.36762	0.731195	0.0129734	1	0.0374324	1
chr2	41848000	41851499	23	7	1.66069	0.602161	0.00284174	1	0.00956014	1
chr2	43139500	43147999	34	4	3.87494	0.258069	1.01261e-13	1	6.24133e-12	1
chr2	43156000	43165499	42	7	2.9754	0.33609	1.80195e-11	1	5.63774e-10	1
chr2	43407500	43419999	42	11	1.9836	0.504134	4.65116e-06	1	3.29103e-05	1
chr2	43806500	43817999	46	15	1.62609	0.614972	0.000327273	1	0.00141999	1
chr2	44639000	44646499	35	10	1.81166	0.55198	0.000129375	1	0.000626817	1
chr2	44981500	44990499	33	11	1.56843	0.637582	0.00243675	1	0.0083539	1
chr2	45397000	45407999	43	14	1.62378	0.615846	0.000464943	1	0.00193423	1
chr2	45870000	45874499	31	4	3.5428	0.282263	1.07796e-11	1	3.55012e-10	1
chr2	45997000	46013499	52	15	1.83367	0.545353	6.93885e-06	1	4.77019e-05	1
chr2	47137000	47146499	38	7	2.69862	0.37056	2.17177e-09	1	3.8564e-08	1
chr2	47343000	47348499	34	2	6.45823	0.154841	9.72048e-23	1	4.05499e-20	1
chr2	47773000	47784499	43	15	1.5223	0.656902	0.00173164	1	0.00615048	1
chr2	49524000	49532499	34	9	1.93747	0.516138	3.6842e-05	1	0.000205476	1
chr2	50793500	50801499	31	6	2.53057	0.395168	1.45257e-07	1	1.57658e-06	1
chr2	51692500	51699999	27	7	1.93747	0.516138	0.000131603	1	0.000632292	1
chr2	53432500	53440999	37	8	2.33726	0.427851	1.9044e-07	1	1.94798e-06	1
chr2	53866500	53880999	41	8	2.58329	0.387103	2.93932e-09	1	4.99737e-08	1
chr2	54206000	54215499	32	6	2.60965	0.383193	4.70662e-08	1	5.9263e-07	1
chr2	54681500	54695499	45	16	1.49787	0.667613	0.0020242	1	0.00707867	1
chr2	55052000	55065499	42	10	2.16393	0.462123	4.39018e-07	1	4.17053e-06	1
chr2	55409500	55422999	48	14	1.8083	0.553005	1.88591e-05	1	0.000114282	1
chr2	55626000	55632999	31	9	1.7714	0.564525	0.000361158	1	0.0015442	1
chr2	55764000	55772499	38	8	2.39877	0.41688	6.95992e-08	1	8.22053e-07	1
chr2	55875500	55883999	31	9	1.7714	0.564525	0.000361158	1	0.0015442	1
chr2	56718500	56731499	44	10	2.26457	0.441584	7.03476e-08	1	8.18135e-07	1
chr2	58055500	58064999	37	7	2.62942	0.380312	6.77502e-09	1	1.05526e-07	1
chr2	60875500	60883499	38	10	1.96263	0.50952	1.30594e-05	1	8.1967e-05	1
chr2	61688500	61697499	38	4	4.31779	0.2316	1.36493e-16	1	1.71563e-14	1
chr2	61906000	61918499	50	13	2.01655	0.495897	5.9662e-07	1	5.36827e-06	1
chr2	62197500	62206999	34	6	2.76781	0.361296	4.53392e-09	1	7.25024e-08	1
chr2	63258000	63270999	40	13	1.62115	0.616847	0.000661184	1	0.00263266	1
chr2	63468500	63480499	46	12	2.00134	0.499665	1.66307e-06	1	1.31691e-05	1
chr2	63587000	63601999	60	24	1.35069	0.740361	0.00658024	1	0.0202011	1
chr2	63607500	63613499	31	7	2.21425	0.45162	3.59057e-06	1	2.60395e-05	1
chr2	64071000	64080499	36	8	2.27576	0.439414	5.08181e-07	1	4.62895e-06	1
chr2	64882500	64893499	41	9	2.32496	0.430115	7.23576e-08	1	8.32431e-07	1
chr2	64915500	64921499	32	5	3.04459	0.328451	6.49619e-10	1	1.32426e-08	1
chr2	65073000	65078499	27	7	1.93747	0.516138	0.000131603	1	0.000632292	1
chr2	65646000	65660499	52	13	2.09563	0.477184	1.16063e-07	1	1.29186e-06	1
chr2	66089000	66096499	33	8	2.09124	0.478186	8.25577e-06	1	5.50333e-05	1
chr2	66582000	66590999	39	0	22.1425	0.045162	3.95093e-39	1	5.68617e-35	1
chr2	66755000	66763499	30	6	2.45149	0.407915	4.35149e-07	1	4.18069e-06	1
chr2	66943500	66954499	42	5	3.9672	0.252067	3.12493e-16	1	3.52737e-14	1
chr2	67707500	67718999	42	10	2.16393	0.462123	4.39018e-07	1	4.17053e-06	1
chr2	67915000	67919999	29	6	2.37241	0.421512	1.26426e-06	1	1.04661e-05	1
chr2	68735500	68753499	61	25	1.32003	0.757557	0.0099933	1	0.0294389	1
chr2	68785000	68798999	48	10	2.46587	0.405537	1.40414e-09	1	2.56614e-08	1
chr2	68923500	68932499	30	6	2.45149	0.407915	4.35149e-07	1	4.18069e-06	1
chr2	69074500	69089499	45	11	2.12199	0.471256	3.81967e-07	1	3.71061e-06	1
chr2	69665500	69674999	36	13	1.46299	0.683534	0.0059706	1	0.0185291	1
chr2	69764000	69772999	37	9	2.10354	0.47539	2.95555e-06	1	2.23463e-05	1
chr2	70672500	70679499	32	9	1.82676	0.547419	0.000173504	1	0.000808899	1
chr2	70845000	70855499	39	7	2.76781	0.361296	6.79214e-10	1	1.3446e-08	1
chr2	70924500	70928999	25	5	2.39877	0.41688	3.13194e-06	1	2.34826e-05	1
chr2	70982000	70990999	40	12	1.74585	0.572787	0.000138962	1	0.000660154	1
chr2	70994500	71002999	29	10	1.50972	0.662377	0.00623225	1	0.0192271	1
chr2	71515000	71539999	102	37	1.50045	0.666469	2.45377e-05	1	0.000143061	1
chr2	71585500	71589499	32	3	4.56689	0.218967	1.0073e-15	1	9.92951e-14	1
chr2	71975000	71985999	39	13	1.58161	0.632269	0.00118641	1	0.00441837	1
chr2	73423500	73435499	37	14	1.40236	0.713085	0.0108758	1	0.0317721	1
chr2	74360000	74376999	62	20	1.66069	0.602161	3.2238e-05	1	0.000182163	1
chr2	74570500	74579999	40	7	2.83701	0.352484	2.07365e-10	1	4.86454e-09	1
chr2	74697500	74707999	40	7	2.83701	0.352484	2.07365e-10	1	4.86454e-09	1
chr2	74714000	74726499	52	17	1.62993	0.613522	0.000162601	1	0.000763507	1
chr2	74735500	74745499	35	10	1.81166	0.55198	0.000129375	1	0.000626817	1
chr2	74916000	74923499	31	8	1.96822	0.508073	4.61663e-05	1	0.000252537	1
chr2	74974000	74980999	34	6	2.76781	0.361296	4.53392e-09	1	7.25024e-08	1
chr2	75020500	75031999	48	8	3.01384	0.331803	8.3673e-13	1	3.75732e-11	1
chr2	77408000	77427999	51	17	1.59918	0.625321	0.000286988	1	0.00125542	1
chr2	79841500	79853999	44	12	1.91618	0.521872	7.91482e-06	1	5.33662e-05	1
chr2	79911500	79920999	34	11	1.61456	0.619365	0.00134145	1	0.00493764	1
chr2	80976500	80982999	28	4	3.21066	0.311462	8.74029e-10	1	1.68507e-08	1
chr2	84308000	84321499	45	14	1.69759	0.58907	0.000137025	1	0.000654734	1
chr2	84858000	84866499	38	3	5.39723	0.18528	1.05679e-20	1	2.71595e-18	1
chr2	86128500	86155999	84	32	1.42584	0.70134	0.000478679	1	0.00198449	1
chr2	86288000	86304999	63	14	2.36187	0.423394	8.20307e-11	1	2.13681e-09	1
chr2	86675500	86683999	31	3	4.4285	0.22581	6.16845e-15	1	5.02982e-13	1
chr2	88185500	88195499	39	10	2.01295	0.496782	5.79039e-06	1	4.03365e-05	1
chr2	88623000	88638999	52	15	1.83367	0.545353	6.93885e-06	1	4.77019e-05	1
chr2	88825500	88834999	42	9	2.38032	0.420112	2.70042e-08	1	3.55088e-07	1
chr2	89771500	89805499	199	85	1.28735	0.776787	0.000188371	1	0.000868642	1
chr2	96883500	96894499	44	10	2.26457	0.441584	7.03476e-08	1	8.18135e-07	1
chr2	97348500	97358499	43	17	1.35315	0.739015	0.0139453	1	0.040096	1
chr2	98577500	98588499	38	10	1.96263	0.50952	1.30594e-05	1	8.1967e-05	1
chr2	98828500	98834499	31	8	1.96822	0.508073	4.61663e-05	1	0.000252537	1
chr2	100956500	100966499	43	17	1.35315	0.739015	0.0139453	1	0.040096	1
chr2	101003500	101019499	56	16	1.85606	0.538775	2.55197e-06	1	1.96091e-05	1
chr2	101044000	101052999	35	12	1.53294	0.652341	0.00299113	1	0.00997414	1
chr2	101176500	101188999	46	15	1.62609	0.614972	0.000327273	1	0.00141999	1
chr2	101298000	101314999	62	14	2.32496	0.430115	2.0959e-10	1	4.74653e-09	1
chr2	102383500	102389999	33	8	2.09124	0.478186	8.25577e-06	1	5.50333e-05	1
chr2	102547500	102555999	38	9	2.15889	0.4632	1.21188e-06	1	1.02086e-05	1
chr2	104997000	105001499	23	1	6.64275	0.15054	4.16128e-19	1	8.80724e-17	1
chr2	105217500	105228499	52	9	2.93388	0.340846	4.46028e-13	1	2.14332e-11	1
chr2	106035500	106039499	29	7	2.07586	0.481728	2.31362e-05	1	0.000135301	1
chr2	106634500	106642499	32	10	1.66069	0.602161	0.00101649	1	0.00382667	1
chr2	106686000	106694999	38	8	2.39877	0.41688	6.95992e-08	1	8.22053e-07	1
chr2	107509000	107514999	29	7	2.07586	0.481728	2.31362e-05	1	0.000135301	1
chr2	107528500	107537499	31	6	2.53057	0.395168	1.45257e-07	1	1.57658e-06	1
chr2	108150000	108156999	29	9	1.66069	0.602161	0.00143473	1	0.00521893	1
chr2	108563500	108572999	28	6	2.29333	0.436047	3.55909e-06	1	2.61606e-05	1
chr2	111161500	111171499	34	5	3.22911	0.309683	4.3688e-11	1	1.24754e-09	1
chr2	111193000	111205499	48	16	1.59556	0.626738	0.000408369	1	0.00171423	1
chr2	112673500	112684999	46	12	2.00134	0.499665	1.66307e-06	1	1.31691e-05	1
chr2	113801000	113813999	45	15	1.59149	0.628341	0.000581837	1	0.00234527	1
chr2	114788500	114795499	30	11	1.43004	0.699283	0.0124349	1	0.0359616	1
chr2	116917500	116922499	28	3	4.01333	0.24917	1.17594e-12	1	5.09761e-11	1
chr2	117686500	117696999	38	12	1.66069	0.602161	0.000509233	1	0.00208148	1
chr2	118163500	118169999	29	9	1.66069	0.602161	0.00143473	1	0.00521893	1
chr2	119792500	119799499	34	6	2.76781	0.361296	4.53392e-09	1	7.25024e-08	1
chr2	119833500	119840999	33	5	3.13685	0.318791	1.70872e-10	1	4.14702e-09	1
chr2	120021000	120027499	26	6	2.13517	0.468347	2.55602e-05	1	0.000148212	1
chr2	120959000	120970999	48	18	1.42761	0.700472	0.00417158	1	0.0134764	1
chr2	121025500	121036499	43	10	2.21425	0.45162	1.77654e-07	1	1.85141e-06	1
chr2	121053500	121064999	45	11	2.12199	0.471256	3.81967e-07	1	3.71061e-06	1
chr2	121265000	121272499	28	6	2.29333	0.436047	3.55909e-06	1	2.61606e-05	1
chr2	122002500	122009999	35	11	1.66069	0.602161	0.000719594	1	0.00282884	1
chr2	126636500	126643499	37	11	1.75295	0.570468	0.000191993	1	0.000881814	1
chr2	127808500	127826999	66	27	1.3246	0.754948	0.00762533	1	0.0229926	1
chr2	128027500	128035999	34	4	3.87494	0.258069	1.01261e-13	1	6.24133e-12	1
chr2	128196000	128212499	52	13	2.09563	0.477184	1.16063e-07	1	1.29186e-06	1
chr2	128669000	128676499	36	8	2.27576	0.439414	5.08181e-07	1	4.62895e-06	1
chr2	128681500	128692999	42	14	1.58688	0.630168	0.000830177	1	0.00321829	1
chr2	133673500	133691999	58	23	1.36084	0.73484	0.00620511	1	0.0191825	1
chr2	134086500	134096999	35	8	2.21425	0.45162	1.32167e-06	1	1.07648e-05	1
chr2	134639000	134649499	35	8	2.21425	0.45162	1.32167e-06	1	1.07648e-05	1
chr2	135261000	135277499	50	18	1.48588	0.673003	0.00163147	1	0.00586123	1
chr2	135311500	135322999	40	4	4.53921	0.220303	4.30123e-18	1	7.50342e-16	1
chr2	135948000	135961999	44	17	1.38391	0.722593	0.00917477	1	0.0272929	1
chr2	136237500	136242499	27	3	3.87494	0.258069	6.3396e-12	1	2.25283e-10	1
chr2	137148000	137157499	39	12	1.70327	0.587107	0.0002691	1	0.00118491	1
chr2	137966500	137975499	35	6	2.84689	0.35126	1.34998e-09	1	2.49408e-08	1
chr2	138018000	138035499	60	20	1.60797	0.621903	0.000100265	1	0.00049359	1
chr2	139866000	139879999	39	13	1.58161	0.632269	0.00118641	1	0.00441837	1
chr2	143180500	143190499	37	7	2.62942	0.380312	6.77502e-09	1	1.05526e-07	1
chr2	143365000	143377999	37	14	1.40236	0.713085	0.0108758	1	0.0317721	1
chr2	144686500	144695999	34	12	1.49036	0.670979	0.0051377	1	0.0162313	1
chr2	144797000	144806999	32	9	1.82676	0.547419	0.000173504	1	0.000808899	1
chr2	145970500	145979499	36	10	1.86198	0.537062	6.17629e-05	1	0.000324709	1
chr2	147753500	147767999	47	15	1.66069	0.602161	0.000180508	1	0.000835195	1
chr2	148098000	148107499	35	10	1.81166	0.55198	0.000129375	1	0.000626817	1
chr2	151540500	151548499	35	10	1.81166	0.55198	0.000129375	1	0.000626817	1
chr2	151627000	151638999	35	10	1.81166	0.55198	0.000129375	1	0.000626817	1
chr2	152084500	152103999	61	17	1.90671	0.524462	4.58124e-07	1	4.32208e-06	1
chr2	154806000	154815999	39	7	2.76781	0.361296	6.79214e-10	1	1.3446e-08	1
chr2	155742500	155751999	25	7	1.79908	0.55584	0.000655946	1	0.00262598	1
chr2	156539000	156549499	37	13	1.50253	0.665546	0.00356666	1	0.0117088	1
chr2	157442500	157457499	56	13	2.25379	0.443697	3.54532e-09	1	5.84136e-08	1
chr2	157538000	157545499	41	11	1.93747	0.516138	1.02465e-05	1	6.53091e-05	1
chr2	160050500	160060499	40	12	1.74585	0.572787	0.000138962	1	0.000660154	1
chr2	161028500	161032499	25	3	3.59815	0.27792	1.65932e-10	1	4.11032e-09	1
chr2	161729500	161739999	33	6	2.68873	0.371923	1.48152e-08	1	2.09348e-07	1
chr2	161905500	161921999	42	15	1.4877	0.672179	0.00289696	1	0.00972205	1
chr2	163559500	163565999	33	7	2.35264	0.425054	4.9524e-07	1	4.57771e-06	1
chr2	164286000	164292499	28	8	1.7837	0.560632	0.000489714	1	0.0020215	1
chr2	165509000	165514499	27	6	2.21425	0.45162	9.69902e-06	1	6.25676e-05	1
chr2	167244000	167253499	45	14	1.69759	0.58907	0.000137025	1	0.000654734	1
chr2	167906000	167918499	42	10	2.16393	0.462123	4.39018e-07	1	4.17053e-06	1
chr2	168179000	168188999	54	18	1.60242	0.624057	0.00020192	1	0.000918902	1
chr2	168250000	168255499	31	8	1.96822	0.508073	4.61663e-05	1	0.000252537	1
chr2	168350000	168363499	50	11	2.35264	0.425054	3.93598e-09	1	6.36837e-08	1
chr2	169025000	169034999	42	11	1.9836	0.504134	4.65116e-06	1	3.29103e-05	1
chr2	169740000	169753999	43	15	1.5223	0.656902	0.00173164	1	0.00615048	1
chr2	169791500	169803999	42	11	1.9836	0.504134	4.65116e-06	1	3.29103e-05	1
chr2	170926500	170937999	44	16	1.46531	0.682449	0.00331952	1	0.0109991	1
chr2	171519000	171522999	27	7	1.93747	0.516138	0.000131603	1	0.000632292	1
chr2	172113000	172121999	35	10	1.81166	0.55198	0.000129375	1	0.000626817	1
chr2	172222500	172231999	38	14	1.43926	0.694801	0.00679838	1	0.0208109	1
chr2	173270500	173275999	34	6	2.76781	0.361296	4.53392e-09	1	7.25024e-08	1
chr2	173812500	173843999	109	30	1.96425	0.509099	1.92902e-11	1	5.99621e-10	1
chr2	173961000	173976499	51	14	1.91902	0.5211	2.18409e-06	1	1.70694e-05	1
chr2	174183500	174200999	46	16	1.53044	0.653408	0.00121029	1	0.00449164	1
chr2	174329500	174334999	30	7	2.14505	0.466189	9.25351e-06	1	6.04386e-05	1
chr2	174581500	174589999	38	11	1.79908	0.55584	9.55922e-05	1	0.000478194	1
chr2	175193000	175200499	26	4	2.98924	0.334534	1.38957e-08	1	1.99787e-07	1
chr2	177228500	177249499	82	29	1.53152	0.652945	5.76037e-05	1	0.000304679	1
chr2	177957500	177967999	40	11	1.89134	0.528726	2.20729e-05	1	0.000130461	1
chr2	177985000	177992999	36	13	1.46299	0.683534	0.0059706	1	0.0185291	1
chr2	179280500	179292499	42	14	1.58688	0.630168	0.000830177	1	0.00321829	1
chr2	181597000	181606999	39	12	1.70327	0.587107	0.0002691	1	0.00118491	1
chr2	182700000	182706499	29	5	2.76781	0.361296	2.98632e-08	1	3.86155e-07	1
chr2	184696000	184707999	44	16	1.46531	0.682449	0.00331952	1	0.0109991	1
chr2	185633500	185639999	32	10	1.66069	0.602161	0.00101649	1	0.00382667	1
chr2	187265500	187270499	31	3	4.4285	0.22581	6.16845e-15	1	5.02982e-13	1
chr2	187457500	187467999	42	7	2.9754	0.33609	1.80195e-11	1	5.63774e-10	1
chr2	187641000	187648499	33	3	4.70528	0.212527	1.59709e-16	1	1.87635e-14	1
chr2	187750000	187758499	35	11	1.66069	0.602161	0.000719594	1	0.00282884	1
chr2	188201000	188216499	56	10	2.86846	0.348619	2.223e-13	1	1.12455e-11	1
chr2	188471500	188476499	26	2	4.98206	0.20072	3.28035e-15	1	2.89636e-13	1
chr2	188601000	188605499	26	5	2.49103	0.40144	1.03035e-06	1	8.90083e-06	1
chr2	188701500	188707999	35	3	4.98206	0.20072	3.68684e-18	1	6.63262e-16	1
chr2	189570500	189580499	38	9	2.15889	0.4632	1.21188e-06	1	1.02086e-05	1
chr2	190271500	190285499	51	15	1.79908	0.55584	1.38137e-05	1	8.59522e-05	1
chr2	190960500	190970999	43	17	1.35315	0.739015	0.0139453	1	0.040096	1
chr2	190975000	190988499	58	11	2.72168	0.36742	9.91624e-13	1	4.40477e-11	1
chr2	191261500	191269999	36	10	1.86198	0.537062	6.17629e-05	1	0.000324709	1
chr2	191847000	191855499	33	12	1.44778	0.690714	0.00860346	1	0.0257344	1
chr2	194283000	194291999	35	9	1.99282	0.5018	1.63056e-05	1	0.000100201	1
chr2	194889000	194898999	46	17	1.44541	0.691844	0.00374565	1	0.0122475	1
chr2	196376000	196380499	24	7	1.72988	0.578074	0.00139017	1	0.00509287	1
chr2	197008500	197018499	38	9	2.15889	0.4632	1.21188e-06	1	1.02086e-05	1
chr2	197144000	197152499	34	11	1.61456	0.619365	0.00134145	1	0.00493764	1
chr2	197229000	197237499	38	9	2.15889	0.4632	1.21188e-06	1	1.02086e-05	1
chr2	197570000	197582999	56	12	2.42716	0.412005	2.14449e-10	1	4.84133e-09	1
chr2	197879000	197890499	39	12	1.70327	0.587107	0.0002691	1	0.00118491	1
chr2	197894500	197901999	33	10	1.71101	0.58445	0.000525164	1	0.00212996	1
chr2	198304000	198309499	29	7	2.07586	0.481728	2.31362e-05	1	0.000135301	1
chr2	198418000	198426999	33	7	2.35264	0.425054	4.9524e-07	1	4.57771e-06	1
chr2	199308500	199319999	41	8	2.58329	0.387103	2.93932e-09	1	4.99737e-08	1
chr2	199987000	199993499	30	4	3.43209	0.291368	4.81474e-11	1	1.31737e-09	1
chr2	200301500	200309499	30	9	1.71604	0.582736	0.000730501	1	0.00285147	1
chr2	200627000	200631499	25	4	2.87852	0.3474	5.25709e-08	1	6.48886e-07	1
chr2	200844500	200857499	52	19	1.46694	0.681691	0.00185214	1	0.00654937	1
chr2	201097500	201104999	26	2	4.98206	0.20072	3.28035e-15	1	2.89636e-13	1
chr2	201121000	201127999	27	7	1.93747	0.516138	0.000131603	1	0.000632292	1
chr2	201397500	201406499	38	12	1.66069	0.602161	0.000509233	1	0.00208148	1
chr2	201884500	201896499	41	12	1.78843	0.559149	7.01539e-05	1	0.000363512	1
chr2	201979500	201983999	27	4	3.09995	0.322586	3.54518e-09	1	5.89171e-08	1
chr2	202619000	202634999	52	19	1.46694	0.681691	0.00185214	1	0.00654937	1
chr2	202845000	202861499	47	18	1.39847	0.715066	0.00649096	1	0.0199696	1
chr2	203061000	203069499	33	4	3.76422	0.265659	4.93938e-13	1	2.33457e-11	1
chr2	203349500	203355999	28	2	5.3511	0.186877	5.22259e-17	1	7.26218e-15	1
chr2	203896000	203906999	42	10	2.16393	0.462123	4.39018e-07	1	4.17053e-06	1
chr2	205595000	205604999	41	7	2.9062	0.344092	6.18355e-11	1	1.64195e-09	1
chr2	205687500	205695999	33	10	1.71101	0.58445	0.000525164	1	0.00212996	1
chr2	206504500	206515499	43	12	1.8736	0.533733	1.67357e-05	1	0.000102146	1
chr2	207331500	207338499	37	3	5.25884	0.190156	7.63528e-20	1	1.7305e-17	1
chr2	207740500	207743499	22	4	2.54639	0.392713	2.27229e-06	1	1.76724e-05	1
chr2	208462500	208472499	39	8	2.46028	0.406458	2.48204e-08	1	3.31214e-07	1
chr2	208491000	208500999	41	7	2.9062	0.344092	6.18355e-11	1	1.64195e-09	1
chr2	209684000	209694999	39	15	1.38391	0.722593	0.0119492	1	0.0346372	1
chr2	209963500	209973999	37	13	1.50253	0.665546	0.00356666	1	0.0117088	1
chr2	210364000	210374999	36	8	2.27576	0.439414	5.08181e-07	1	4.62895e-06	1
chr2	212280500	212285499	30	3	4.29011	0.233094	3.66433e-14	1	2.47012e-12	1
chr2	212387500	212400499	40	10	2.06328	0.484666	2.50757e-06	1	1.93714e-05	1
chr2	212958500	212977999	59	16	1.95375	0.511836	2.87047e-07	1	2.84223e-06	1
chr2	214873000	214881499	34	12	1.49036	0.670979	0.0051377	1	0.0162313	1
chr2	215475500	215496499	75	22	1.82916	0.546698	2.07728e-07	1	2.09211e-06	1
chr2	216163000	216172499	36	13	1.46299	0.683534	0.0059706	1	0.0185291	1
chr2	216478500	216489499	42	16	1.40019	0.71419	0.00840617	1	0.0252308	1
chr2	216600500	216611999	40	14	1.51307	0.660908	0.00248241	1	0.00845306	1
chr2	216636500	216643999	27	6	2.21425	0.45162	9.69902e-06	1	6.25676e-05	1
chr2	217737000	217748499	45	17	1.41466	0.706884	0.00591915	1	0.018451	1
chr2	217843500	217852499	39	6	3.16321	0.316134	8.17577e-12	1	2.83874e-10	1
chr2	218373500	218381999	35	7	2.49103	0.40144	6.1083e-08	1	7.40924e-07	1
chr2	218648000	218653499	28	6	2.29333	0.436047	3.55909e-06	1	2.61606e-05	1
chr2	218740500	218753999	41	13	1.66069	0.602161	0.000360341	1	0.00155224	1
chr2	218876500	218884499	34	7	2.42183	0.41291	1.76311e-07	1	1.85691e-06	1
chr2	218906500	218915499	33	11	1.56843	0.637582	0.00243675	1	0.0083539	1
chr2	218971000	218977999	30	6	2.45149	0.407915	4.35149e-07	1	4.18069e-06	1
chr2	224673500	224687999	55	19	1.54997	0.645172	0.000417236	1	0.00174687	1
chr2	225273500	225285999	51	9	2.87852	0.3474	1.46556e-12	1	6.05232e-11	1
chr2	225625500	225633999	35	8	2.21425	0.45162	1.32167e-06	1	1.07648e-05	1
chr2	226704000	226716999	42	6	3.40045	0.294078	1.37327e-13	1	7.79647e-12	1
chr2	229478000	229489999	43	16	1.43275	0.697959	0.00533619	1	0.0167682	1
chr2	230792000	230799999	34	3	4.84367	0.206455	2.46063e-17	1	3.63214e-15	1
chr2	230805500	230812999	36	8	2.27576	0.439414	5.08181e-07	1	4.62895e-06	1
chr2	230951500	230959499	35	2	6.64275	0.15054	9.72643e-24	1	4.91168e-21	1
chr2	233453500	233461999	34	12	1.49036	0.670979	0.0051377	1	0.0162313	1
chr2	234842500	234849999	35	11	1.66069	0.602161	0.000719594	1	0.00282884	1
chr2	237973500	237979499	31	5	2.95233	0.338715	2.39873e-09	1	4.1719e-08	1
chr2	238005000	238019499	54	7	3.80574	0.262761	1.32209e-18	1	2.4711e-16	1
chr2	238241500	238247999	37	12	1.61811	0.618007	0.000941251	1	0.00360087	1
chr2	239148000	239160999	48	13	1.93747	0.516138	2.8462e-06	1	2.1725e-05	1
chr2	241239000	241244499	29	5	2.76781	0.361296	2.98632e-08	1	3.86155e-07	1
chr2	241488500	241496999	44	13	1.77931	0.562016	5.12214e-05	1	0.000275426	1
chr2	242050500	242059499	31	6	2.53057	0.395168	1.45257e-07	1	1.57658e-06	1
chr3	773500	788499	52	10	2.66716	0.37493	2.04536e-11	1	6.3373e-10	1
chr3	1466500	1473499	31	6	2.53057	0.395168	1.45257e-07	1	1.57658e-06	1
chr3	3228500	3244999	58	19	1.63301	0.612367	8.10493e-05	1	0.000415777	1
chr3	3532500	3540999	39	12	1.70327	0.587107	0.0002691	1	0.00118491	1
chr3	5664500	5678999	43	15	1.5223	0.656902	0.00173164	1	0.00615048	1
chr3	6947000	6957999	35	11	1.66069	0.602161	0.000719594	1	0.00282884	1
chr3	8451000	8458999	32	11	1.5223	0.656902	0.00431081	1	0.0138686	1
chr3	8585500	8596999	46	8	2.89083	0.345922	9.58017e-12	1	3.24037e-10	1
chr3	9020500	9030499	50	15	1.76448	0.566739	2.70068e-05	1	0.000154822	1
chr3	11017500	11023499	32	4	3.65351	0.273709	2.34159e-12	1	9.12049e-11	1
chr3	11035500	11047499	41	7	2.9062	0.344092	6.18355e-11	1	1.64195e-09	1
chr3	11346000	11358499	44	9	2.49103	0.40144	3.51957e-09	1	5.91403e-08	1
chr3	11814500	11821499	31	5	2.95233	0.338715	2.39873e-09	1	4.1719e-08	1
chr3	12772000	12781999	43	13	1.73977	0.57479	0.000100256	1	0.000495069	1
chr3	13650000	13655999	29	4	3.32137	0.30108	2.08459e-10	1	4.7773e-09	1
chr3	14133500	14145999	42	14	1.58688	0.630168	0.000830177	1	0.00321829	1
chr3	14241000	14253999	49	12	2.12909	0.469685	1.37804e-07	1	1.52266e-06	1
chr3	14393000	14405499	51	14	1.91902	0.5211	2.18409e-06	1	1.70694e-05	1
chr3	14780000	14797499	63	21	1.61036	0.620978	7.07501e-05	1	0.000364697	1
chr3	15489500	15494999	25	7	1.79908	0.55584	0.000655946	1	0.00262598	1
chr3	15936000	15942499	32	11	1.5223	0.656902	0.00431081	1	0.0138686	1
chr3	17691500	17696499	28	3	4.01333	0.24917	1.17594e-12	1	5.09761e-11	1
chr3	18391500	18406499	47	9	2.6571	0.37635	1.41218e-10	1	3.55007e-09	1
chr3	18636000	18652499	52	17	1.62993	0.613522	0.000162601	1	0.000763507	1
chr3	19069500	19075999	26	9	1.49462	0.669067	0.0090438	1	0.0269702	1
chr3	19187500	19197499	38	7	2.69862	0.37056	2.17177e-09	1	3.8564e-08	1
chr3	21785000	21793999	37	14	1.40236	0.713085	0.0108758	1	0.0317721	1
chr3	22360000	22362999	3	21	0.100648	9.93565	1	7.20563e-08	1	0.000103703
chr3	23638000	23646499	31	8	1.96822	0.508073	4.61663e-05	1	0.000252537	1
chr3	23815500	23823999	38	9	2.15889	0.4632	1.21188e-06	1	1.02086e-05	1
chr3	24123500	24133999	37	12	1.61811	0.618007	0.000941251	1	0.00360087	1
chr3	24580000	24587999	30	7	2.14505	0.466189	9.25351e-06	1	6.04386e-05	1
chr3	25289000	25296999	30	9	1.71604	0.582736	0.000730501	1	0.00285147	1
chr3	25888500	25896999	31	6	2.53057	0.395168	1.45257e-07	1	1.57658e-06	1
chr3	26958500	26973999	47	19	1.32855	0.752701	0.0157278	1	0.0445317	1
chr3	27293500	27304499	43	9	2.43567	0.410564	9.85596e-09	1	1.45038e-07	1
chr3	28042500	28054499	41	12	1.78843	0.559149	7.01539e-05	1	0.000363512	1
chr3	28159000	28161999	19	3	2.76781	0.361296	1.16611e-06	1	9.91594e-06	1
chr3	28303000	28311999	37	6	3.00505	0.332773	1.10537e-10	1	2.83069e-09	1
chr3	28502000	28515999	41	13	1.66069	0.602161	0.000360341	1	0.00155224	1
chr3	29772500	29774499	4	19	0.138391	7.22593	1	6.78956e-05	1	0.043429
chr3	31789000	31801499	44	13	1.77931	0.562016	5.12214e-05	1	0.000275426	1
chr3	32427500	32431499	24	5	2.30651	0.433556	9.18142e-06	1	6.04478e-05	1
chr3	32632000	32643499	41	13	1.66069	0.602161	0.000360341	1	0.00155224	1
chr3	32769500	32779499	48	13	1.93747	0.516138	2.8462e-06	1	2.1725e-05	1
chr3	33149000	33153999	30	4	3.43209	0.291368	4.81474e-11	1	1.31737e-09	1
chr3	33655500	33665499	37	13	1.50253	0.665546	0.00356666	1	0.0117088	1
chr3	33734500	33745999	38	13	1.54207	0.648481	0.00208101	1	0.00723165	1
chr3	33770000	33778499	35	8	2.21425	0.45162	1.32167e-06	1	1.07648e-05	1
chr3	36333500	36351999	57	16	1.88862	0.529486	1.25214e-06	1	1.04438e-05	1
chr3	37471000	37485999	58	14	2.17734	0.459275	7.64253e-09	1	1.17701e-07	1
chr3	37617000	37634499	55	14	2.06663	0.483879	9.56345e-08	1	1.08547e-06	1
chr3	37711000	37727999	69	27	1.38391	0.722593	0.002476	1	0.00845723	1
chr3	38054500	38063499	33	4	3.76422	0.265659	4.93938e-13	1	2.33457e-11	1
chr3	38281500	38285999	27	2	5.16658	0.193552	4.21159e-16	1	4.60937e-14	1
chr3	38418500	38429499	37	10	1.91231	0.522929	2.87523e-05	1	0.000163526	1
chr3	38444000	38451999	30	7	2.14505	0.466189	9.25351e-06	1	6.04386e-05	1
chr3	38869000	38871999	25	4	2.87852	0.3474	5.25709e-08	1	6.48886e-07	1
chr3	39512500	39518499	37	6	3.00505	0.332773	1.10537e-10	1	2.83069e-09	1
chr3	40586500	40595999	41	13	1.66069	0.602161	0.000360341	1	0.00155224	1
chr3	41176500	41184999	31	10	1.61036	0.620978	0.00191403	1	0.0067376	1
chr3	42364000	42372999	36	9	2.04818	0.488238	7.03096e-06	1	4.79913e-05	1
chr3	42883000	42898999	52	5	4.8898	0.204507	1.52447e-23	1	6.96513e-21	1
chr3	43187000	43192999	27	7	1.93747	0.516138	0.000131603	1	0.000632292	1
chr3	43382500	43395499	51	15	1.79908	0.55584	1.38137e-05	1	8.59522e-05	1
chr3	43702000	43708499	32	5	3.04459	0.328451	6.49619e-10	1	1.32426e-08	1
chr3	44583000	44591499	38	11	1.79908	0.55584	9.55922e-05	1	0.000478194	1
chr3	44892500	44901999	41	6	3.32137	0.30108	5.48867e-13	1	2.53589e-11	1
chr3	45797000	45810999	44	13	1.77931	0.562016	5.12214e-05	1	0.000275426	1
chr3	45892000	45902999	55	13	2.21425	0.45162	8.70417e-09	1	1.28813e-07	1
chr3	45910500	45918999	38	8	2.39877	0.41688	6.95992e-08	1	8.22053e-07	1
chr3	46325500	46331999	32	4	3.65351	0.273709	2.34159e-12	1	9.12049e-11	1
chr3	49409000	49429999	76	28	1.4698	0.680363	0.000328338	1	0.00142247	1
chr3	49836500	49849499	52	9	2.93388	0.340846	4.46028e-13	1	2.14332e-11	1
chr3	50314000	50327999	48	11	2.26038	0.442404	2.6032e-08	1	3.43718e-07	1
chr3	50532000	50539999	38	13	1.54207	0.648481	0.00208101	1	0.00723165	1
chr3	50598000	50613499	62	18	1.8355	0.544812	1.39712e-06	1	1.11367e-05	1
chr3	50939500	50959499	64	18	1.89377	0.528048	3.45017e-07	1	3.36986e-06	1
chr3	51702500	51714999	38	8	2.39877	0.41688	6.95992e-08	1	8.22053e-07	1
chr3	51933000	51961999	103	40	1.40416	0.712171	0.000262685	1	0.00116702	1
chr3	52780000	52781999	20	1	5.8124	0.172046	8.66318e-16	1	8.84258e-14	1
chr3	53157500	53172999	69	14	2.58329	0.387103	2.16149e-13	1	1.10509e-11	1
chr3	53304000	53312499	36	5	3.41363	0.292943	2.63085e-12	1	9.95089e-11	1
chr3	53640000	53646999	38	8	2.39877	0.41688	6.95992e-08	1	8.22053e-07	1
chr3	54152000	54162499	36	5	3.41363	0.292943	2.63085e-12	1	9.95089e-11	1
chr3	54375500	54391999	67	9	3.76422	0.265659	1.03258e-21	1	3.53832e-19	1
chr3	54773000	54778499	31	6	2.53057	0.395168	1.45257e-07	1	1.57658e-06	1
chr3	56645000	56663499	59	22	1.44408	0.692485	0.00163308	1	0.00585971	1
chr3	56842000	56849499	34	11	1.61456	0.619365	0.00134145	1	0.00493764	1
chr3	57031500	57048499	68	21	1.73617	0.57598	3.77777e-06	1	2.69691e-05	1
chr3	58150500	58167999	59	18	1.74809	0.572052	1.01608e-05	1	6.50075e-05	1
chr3	59002000	59011499	40	7	2.83701	0.352484	2.07365e-10	1	4.86454e-09	1
chr3	59920500	59925499	25	7	1.79908	0.55584	0.000655946	1	0.00262598	1
chr3	61407500	61421999	61	17	1.90671	0.524462	4.58124e-07	1	4.32208e-06	1
chr3	62589500	62607499	53	13	2.13517	0.468347	4.98162e-08	1	6.18865e-07	1
chr3	64027000	64030499	26	4	2.98924	0.334534	1.38957e-08	1	1.99787e-07	1
chr3	64182000	64187999	25	8	1.59918	0.625321	0.0039101	1	0.0127346	1
chr3	64458000	64470499	48	16	1.59556	0.626738	0.000408369	1	0.00171423	1
chr3	64686000	64691999	27	8	1.72219	0.580655	0.00101134	1	0.00383991	1
chr3	64723000	64731999	38	7	2.69862	0.37056	2.17177e-09	1	3.8564e-08	1
chr3	64746000	64755999	35	12	1.53294	0.652341	0.00299113	1	0.00997414	1
chr3	65442500	65449499	33	8	2.09124	0.478186	8.25577e-06	1	5.50333e-05	1
chr3	67403500	67410499	28	7	2.00666	0.49834	5.60715e-05	1	0.000298274	1
chr3	68631000	68639999	33	4	3.76422	0.265659	4.93938e-13	1	2.33457e-11	1
chr3	68906000	68917999	44	12	1.91618	0.521872	7.91482e-06	1	5.33662e-05	1
chr3	69100500	69112999	56	10	2.86846	0.348619	2.223e-13	1	1.12455e-11	1
chr3	71146500	71155999	35	8	2.21425	0.45162	1.32167e-06	1	1.07648e-05	1
chr3	72227500	72240999	43	5	4.05946	0.246338	6.37898e-17	1	8.50058e-15	1
chr3	72872500	72881999	37	4	4.20707	0.237695	7.40794e-16	1	7.75382e-14	1
chr3	77560000	77567499	27	7	1.93747	0.516138	0.000131603	1	0.000632292	1
chr3	78690500	78698499	35	10	1.81166	0.55198	0.000129375	1	0.000626817	1
chr3	78754000	78763499	34	7	2.42183	0.41291	1.76311e-07	1	1.85691e-06	1
chr3	78994000	79000499	30	9	1.71604	0.582736	0.000730501	1	0.00285147	1
chr3	79676500	79682999	30	7	2.14505	0.466189	9.25351e-06	1	6.04386e-05	1
chr3	80949000	80962499	45	14	1.69759	0.58907	0.000137025	1	0.000654734	1
chr3	81471000	81485999	57	19	1.60533	0.622925	0.000142218	1	0.000672404	1
chr3	81755500	81763499	35	11	1.66069	0.602161	0.000719594	1	0.00282884	1
chr3	82687000	82690999	24	4	2.76781	0.361296	1.9173e-07	1	1.93981e-06	1
chr3	83980000	83987999	34	9	1.93747	0.516138	3.6842e-05	1	0.000205476	1
chr3	84204500	84210999	28	5	2.67555	0.373755	1.00501e-07	1	1.12957e-06	1
chr3	87239000	87247999	35	8	2.21425	0.45162	1.32167e-06	1	1.07648e-05	1
chr3	87933500	87950999	66	17	2.06048	0.485323	1.01305e-08	1	1.48698e-07	1
chr3	89301500	89311999	47	9	2.6571	0.37635	1.41218e-10	1	3.55007e-09	1
chr3	93936000	93944499	35	5	3.32137	0.30108	1.08659e-11	1	3.47903e-10	1
chr3	94357500	94364999	37	11	1.75295	0.570468	0.000191993	1	0.000881814	1
chr3	97173000	97186999	4	30	0.0892842	11.2002	1	4.81474e-11	1	1.73234e-07
chr3	97526500	97530999	26	5	2.49103	0.40144	1.03035e-06	1	8.90083e-06	1
chr3	98091000	98106999	47	10	2.41554	0.413985	3.85124e-09	1	6.27712e-08	1
chr3	98279000	98286499	39	3	5.53562	0.180648	1.42642e-21	1	4.71931e-19	1
chr3	98501000	98507999	29	6	2.37241	0.421512	1.26426e-06	1	1.04661e-05	1
chr3	99364000	99370499	32	9	1.82676	0.547419	0.000173504	1	0.000808899	1
chr3	99644500	99649499	27	3	3.87494	0.258069	6.3396e-12	1	2.25283e-10	1
chr3	100077000	100086499	41	12	1.78843	0.559149	7.01539e-05	1	0.000363512	1
chr3	100252000	100262999	41	13	1.66069	0.602161	0.000360341	1	0.00155224	1
chr3	100375000	100387999	39	15	1.38391	0.722593	0.0119492	1	0.0346372	1
chr3	100589500	100603499	52	18	1.54415	0.647607	0.000594196	1	0.00238907	1
chr3	100621500	100633999	50	6	4.0331	0.247948	9.71112e-19	1	1.85116e-16	1
chr3	100789000	100794999	29	8	1.84521	0.541944	0.000229768	1	0.00103743	1
chr3	100852000	100865999	42	14	1.58688	0.630168	0.000830177	1	0.00321829	1
chr3	100971500	100979999	31	9	1.7714	0.564525	0.000361158	1	0.0015442	1
chr3	101373000	101387499	58	16	1.92119	0.520512	6.04379e-07	1	5.41439e-06	1
chr3	101639000	101646499	43	14	1.62378	0.615846	0.000464943	1	0.00193423	1
chr3	102150500	102184499	103	40	1.40416	0.712171	0.000262685	1	0.00116702	1
chr3	103033500	103041999	33	9	1.88211	0.531318	8.10515e-05	1	0.000412991	1
chr3	103352500	103365499	40	7	2.83701	0.352484	2.07365e-10	1	4.86454e-09	1
chr3	103876500	103881499	27	4	3.09995	0.322586	3.54518e-09	1	5.89171e-08	1
chr3	104240000	104242999	27	4	3.09995	0.322586	3.54518e-09	1	5.89171e-08	1
chr3	104626500	104635499	40	6	3.24229	0.308424	2.14356e-12	1	8.64149e-11	1
chr3	104816000	104826999	34	11	1.61456	0.619365	0.00134145	1	0.00493764	1
chr3	105649000	105655999	33	11	1.56843	0.637582	0.00243675	1	0.0083539	1
chr3	106055500	106068499	49	12	2.12909	0.469685	1.37804e-07	1	1.52266e-06	1
chr3	108937000	108952499	49	12	2.12909	0.469685	1.37804e-07	1	1.52266e-06	1
chr3	109088500	109095999	30	4	3.43209	0.291368	4.81474e-11	1	1.31737e-09	1
chr3	111608000	111623499	57	21	1.45939	0.685217	0.00146719	1	0.00528358	1
chr3	111982000	111994499	51	10	2.61684	0.38214	6.05629e-11	1	1.62464e-09	1
chr3	112409500	112416999	38	11	1.79908	0.55584	9.55922e-05	1	0.000478194	1
chr3	112502500	112507999	30	7	2.14505	0.466189	9.25351e-06	1	6.04386e-05	1
chr3	112701500	112709499	39	8	2.46028	0.406458	2.48204e-08	1	3.31214e-07	1
chr3	114070500	114079999	34	8	2.15274	0.464524	3.3481e-06	1	2.4928e-05	1
chr3	115276000	115295499	87	36	1.31658	0.759543	0.00385352	1	0.0125859	1
chr3	115385500	115396499	39	11	1.84521	0.541944	4.6474e-05	1	0.000252112	1
chr3	116015000	116022999	36	8	2.27576	0.439414	5.08181e-07	1	4.62895e-06	1
chr3	119287500	119297499	36	13	1.46299	0.683534	0.0059706	1	0.0185291	1
chr3	119597500	119606499	32	8	2.02973	0.492677	1.98017e-05	1	0.00011867	1
chr3	119749000	119757999	33	6	2.68873	0.371923	1.48152e-08	1	2.09348e-07	1
chr3	120322000	120332999	38	11	1.79908	0.55584	9.55922e-05	1	0.000478194	1
chr3	120784500	120793999	40	8	2.52178	0.396545	8.64196e-09	1	1.2902e-07	1
chr3	122438000	122443499	29	6	2.37241	0.421512	1.26426e-06	1	1.04661e-05	1
chr3	122465500	122473499	38	13	1.54207	0.648481	0.00208101	1	0.00723165	1
chr3	122525000	122539499	52	17	1.62993	0.613522	0.000162601	1	0.000763507	1
chr3	122677500	122684999	30	10	1.56004	0.64101	0.00350392	1	0.0115569	1
chr3	123034000	123040999	32	7	2.28344	0.437935	1.35275e-06	1	1.08764e-05	1
chr3	123109500	123126999	62	22	1.51628	0.659509	0.000399975	1	0.00168243	1
chr3	123140000	123151499	50	12	2.17167	0.460476	5.77973e-08	1	7.08232e-07	1
chr3	124111500	124119999	35	8	2.21425	0.45162	1.32167e-06	1	1.07648e-05	1
chr3	124924500	124932499	34	12	1.49036	0.670979	0.0051377	1	0.0162313	1
chr3	125380000	125404999	85	31	1.4877	0.672179	0.000118529	1	0.000578652	1
chr3	126051000	126071499	70	21	1.7865	0.559755	1.06156e-06	1	9.04292e-06	1
chr3	126108000	126113499	30	3	4.29011	0.233094	3.66433e-14	1	2.47012e-12	1
chr3	126817000	126834499	52	17	1.62993	0.613522	0.000162601	1	0.000763507	1
chr3	127223500	127234999	47	17	1.47617	0.677431	0.00232547	1	0.00801249	1
chr3	128079000	128086999	38	10	1.96263	0.50952	1.30594e-05	1	8.1967e-05	1
chr3	128110500	128117499	28	3	4.01333	0.24917	1.17594e-12	1	5.09761e-11	1
chr3	129302500	129318499	64	11	2.99846	0.333504	9.83526e-16	1	9.86404e-14	1
chr3	129345500	129354499	42	9	2.38032	0.420112	2.70042e-08	1	3.55088e-07	1
chr3	129627000	129638499	45	18	1.3402	0.746155	0.0148635	1	0.0424521	1
chr3	130488500	130494499	32	5	3.04459	0.328451	6.49619e-10	1	1.32426e-08	1
chr3	130742000	130748999	27	9	1.54997	0.645172	0.00505203	1	0.0160275	1
chr3	131059500	131068499	36	10	1.86198	0.537062	6.17629e-05	1	0.000324709	1
chr3	132191000	132200499	40	3	5.67401	0.176242	1.87872e-22	1	7.30773e-20	1
chr3	132378500	132387999	35	5	3.32137	0.30108	1.08659e-11	1	3.47903e-10	1
chr3	133820500	133831499	39	11	1.84521	0.541944	4.6474e-05	1	0.000252112	1
chr3	133900500	133912499	39	15	1.38391	0.722593	0.0119492	1	0.0346372	1
chr3	134327000	134340499	50	16	1.66069	0.602161	0.000127809	1	0.000622692	1
chr3	134440500	134450499	40	12	1.74585	0.572787	0.000138962	1	0.000660154	1
chr3	134544000	134556499	42	9	2.38032	0.420112	2.70042e-08	1	3.55088e-07	1
chr3	134910500	134917999	33	11	1.56843	0.637582	0.00243675	1	0.0083539	1
chr3	134991000	135000999	34	10	1.76133	0.567751	0.000264113	1	0.00116993	1
chr3	135191000	135221999	84	24	1.88211	0.531318	1.47824e-08	1	2.1127e-07	1
chr3	135694000	135704999	33	9	1.88211	0.531318	8.10515e-05	1	0.000412991	1
chr3	135895500	135903499	33	11	1.56843	0.637582	0.00243675	1	0.0083539	1
chr3	136234000	136243999	37	11	1.75295	0.570468	0.000191993	1	0.000881814	1
chr3	136494500	136500999	28	6	2.29333	0.436047	3.55909e-06	1	2.61606e-05	1
chr3	138385500	138392499	31	7	2.21425	0.45162	3.59057e-06	1	2.60395e-05	1
chr3	141956500	141972999	49	10	2.51619	0.397426	5.01969e-10	1	1.05465e-08	1
chr3	144632000	144636999	23	5	2.21425	0.45162	2.59252e-05	1	0.000149008	1
chr3	146799500	146813499	38	12	1.66069	0.602161	0.000509233	1	0.00208148	1
chr3	146832500	146840499	30	6	2.45149	0.407915	4.35149e-07	1	4.18069e-06	1
chr3	149684500	149688999	28	8	1.7837	0.560632	0.000489714	1	0.0020215	1
chr3	149723000	149738999	47	17	1.47617	0.677431	0.00232547	1	0.00801249	1
chr3	149750000	149757499	27	6	2.21425	0.45162	9.69902e-06	1	6.25676e-05	1
chr3	150011000	150024499	42	11	1.9836	0.504134	4.65116e-06	1	3.29103e-05	1
chr3	150275000	150286499	45	13	1.81885	0.549799	2.56318e-05	1	0.000147853	1
chr3	150461000	150470999	39	13	1.58161	0.632269	0.00118641	1	0.00441837	1
chr3	150631500	150637499	29	5	2.76781	0.361296	2.98632e-08	1	3.86155e-07	1
chr3	150905000	150911999	35	7	2.49103	0.40144	6.1083e-08	1	7.40924e-07	1
chr3	151950000	151959999	35	7	2.49103	0.40144	6.1083e-08	1	7.40924e-07	1
chr3	152466500	152471999	26	5	2.49103	0.40144	1.03035e-06	1	8.90083e-06	1
chr3	153538500	153554999	55	21	1.40907	0.709689	0.00356228	1	0.0117252	1
chr3	153777000	153793999	46	15	1.62609	0.614972	0.000327273	1	0.00141999	1
chr3	155153000	155156499	4	19	0.138391	7.22593	1	6.78956e-05	1	0.043429
chr3	155427500	155435499	33	9	1.88211	0.531318	8.10515e-05	1	0.000412991	1
chr3	155677000	155683499	32	8	2.02973	0.492677	1.98017e-05	1	0.00011867	1
chr3	155907000	155911499	29	2	5.53562	0.180648	6.26239e-18	1	1.03004e-15	1
chr3	156529000	156537999	41	9	2.32496	0.430115	7.23576e-08	1	8.32431e-07	1
chr3	156801500	156811999	39	7	2.76781	0.361296	6.79214e-10	1	1.3446e-08	1
chr3	158367500	158384499	51	11	2.39877	0.41688	1.4875e-09	1	2.676e-08	1
chr3	158474500	158486499	47	12	2.04392	0.489255	7.39459e-07	1	6.55717e-06	1
chr3	159149500	159160999	47	11	2.21425	0.45162	6.50221e-08	1	7.78211e-07	1
chr3	159904500	159912999	33	11	1.56843	0.637582	0.00243675	1	0.0083539	1
chr3	160221500	160228999	30	9	1.71604	0.582736	0.000730501	1	0.00285147	1
chr3	160674500	160697999	71	23	1.66069	0.602161	1.15191e-05	1	7.31936e-05	1
chr3	160845000	160858499	46	11	2.16812	0.461229	1.59205e-07	1	1.70165e-06	1
chr3	160864000	160872499	40	7	2.83701	0.352484	2.07365e-10	1	4.86454e-09	1
chr3	161014500	161018499	26	3	3.73655	0.267627	3.30181e-11	1	9.68801e-10	1
chr3	161075000	161079999	26	4	2.98924	0.334534	1.38957e-08	1	1.99787e-07	1
chr3	161107500	161121499	47	17	1.47617	0.677431	0.00232547	1	0.00801249	1
chr3	161655000	161663999	33	6	2.68873	0.371923	1.48152e-08	1	2.09348e-07	1
chr3	161854500	161863499	38	10	1.96263	0.50952	1.30594e-05	1	8.1967e-05	1
chr3	162700000	162709999	38	10	1.96263	0.50952	1.30594e-05	1	8.1967e-05	1
chr3	163023500	163032499	36	11	1.70682	0.585886	0.000376341	1	0.00159467	1
chr3	163138000	163144999	32	1	9.13378	0.109484	5.96963e-30	1	1.14553e-26	1
chr3	163553000	163563499	41	11	1.93747	0.516138	1.02465e-05	1	6.53091e-05	1
chr3	164124500	164134499	38	8	2.39877	0.41688	6.95992e-08	1	8.22053e-07	1
chr3	166211000	166223999	41	16	1.36762	0.731195	0.0129734	1	0.0374324	1
chr3	167563500	167577499	51	14	1.91902	0.5211	2.18409e-06	1	1.70694e-05	1
chr3	167916500	167924999	35	6	2.84689	0.35126	1.34998e-09	1	2.49408e-08	1
chr3	168062000	168065499	26	4	2.98924	0.334534	1.38957e-08	1	1.99787e-07	1
chr3	169343000	169356999	46	9	2.60174	0.384358	4.21117e-10	1	9.00553e-09	1
chr3	170506000	170512499	31	10	1.61036	0.620978	0.00191403	1	0.0067376	1
chr3	170519500	170527999	35	12	1.53294	0.652341	0.00299113	1	0.00997414	1
chr3	170754000	170767499	49	13	1.97701	0.505815	1.31555e-06	1	1.08005e-05	1
chr3	171463000	171476499	50	17	1.56843	0.637582	0.000497606	1	0.00204294	1
chr3	173160000	173170499	39	15	1.38391	0.722593	0.0119492	1	0.0346372	1
chr3	175029500	175035999	34	6	2.76781	0.361296	4.53392e-09	1	7.25024e-08	1
chr3	175625500	175635999	32	10	1.66069	0.602161	0.00101649	1	0.00382667	1
chr3	177162500	177171499	37	9	2.10354	0.47539	2.95555e-06	1	2.23463e-05	1
chr3	177287500	177295499	32	10	1.66069	0.602161	0.00101649	1	0.00382667	1
chr3	178469000	178476999	32	9	1.82676	0.547419	0.000173504	1	0.000808899	1
chr3	179482500	179494499	43	14	1.62378	0.615846	0.000464943	1	0.00193423	1
chr3	180780500	180795499	41	13	1.66069	0.602161	0.000360341	1	0.00155224	1
chr3	182870500	182880499	37	10	1.91231	0.522929	2.87523e-05	1	0.000163526	1
chr3	183478500	183488499	40	9	2.26961	0.440605	1.89519e-07	1	1.96156e-06	1
chr3	184000500	184006999	29	6	2.37241	0.421512	1.26426e-06	1	1.04661e-05	1
chr3	184545000	184555499	42	13	1.70023	0.588157	0.000192126	1	0.000877244	1
chr3	184755500	184762499	40	6	3.24229	0.308424	2.14356e-12	1	8.64149e-11	1
chr3	184815000	184820499	26	5	2.49103	0.40144	1.03035e-06	1	8.90083e-06	1
chr3	185019000	185028499	36	6	2.92597	0.341767	3.91358e-10	1	8.54693e-09	1
chr3	186315000	186319999	25	9	1.43926	0.694801	0.0156729	1	0.0444593	1
chr3	186628500	186643999	50	17	1.56843	0.637582	0.000497606	1	0.00204294	1
chr3	187215000	187227499	49	18	1.45674	0.686463	0.00263243	1	0.00892273	1
chr3	187495000	187500999	38	12	1.66069	0.602161	0.000509233	1	0.00208148	1
chr3	188159500	188177499	55	20	1.47617	0.677431	0.00130447	1	0.00482496	1
chr3	188894000	188903999	33	9	1.88211	0.531318	8.10515e-05	1	0.000412991	1
chr3	189121000	189132999	38	14	1.43926	0.694801	0.00679838	1	0.0208109	1
chr3	189473500	189484499	32	6	2.60965	0.383193	4.70662e-08	1	5.9263e-07	1
chr3	191632000	191635999	25	6	2.05609	0.48636	6.5071e-05	1	0.000339435	1
chr3	192452500	192457999	30	5	2.86007	0.349642	8.59546e-09	1	1.3056e-07	1
chr3	193057500	193068999	41	14	1.54997	0.645172	0.00145116	1	0.00524618	1
chr3	193389000	193400499	39	10	2.01295	0.496782	5.79039e-06	1	4.03365e-05	1
chr3	193875000	193887499	54	5	5.07432	0.197071	4.15816e-25	1	2.54656e-22	1
chr3	194256000	194264999	37	13	1.50253	0.665546	0.00356666	1	0.0117088	1
chr3	194548500	194559499	47	11	2.21425	0.45162	6.50221e-08	1	7.78211e-07	1
chr3	194720500	194728999	33	5	3.13685	0.318791	1.70872e-10	1	4.14702e-09	1
chr3	194747500	194752999	27	3	3.87494	0.258069	6.3396e-12	1	2.25283e-10	1
chr3	195225500	195231999	28	10	1.45939	0.685217	0.0107631	1	0.0315807	1
chr3	195337500	195353499	53	16	1.75837	0.568707	1.95322e-05	1	0.00011784	1
chr3	195393000	195403999	38	13	1.54207	0.648481	0.00208101	1	0.00723165	1
chr3	195818500	195829999	53	11	2.49103	0.40144	2.01022e-10	1	4.79389e-09	1
chr3	196475500	196481999	28	3	4.01333	0.24917	1.17594e-12	1	5.09761e-11	1
chr3	196585000	196592999	37	9	2.10354	0.47539	2.95555e-06	1	2.23463e-05	1
chr3	196850500	196859499	33	5	3.13685	0.318791	1.70872e-10	1	4.14702e-09	1
chr3	197445000	197454499	43	8	2.7063	0.369508	3.17608e-10	1	7.08685e-09	1
chr3	197461500	197477499	49	18	1.45674	0.686463	0.00263243	1	0.00892273	1
chr3	197992500	198002999	39	14	1.47617	0.677431	0.00415423	1	0.0134809	1
chr4	593000	606499	45	18	1.3402	0.746155	0.0148635	1	0.0424521	1
chr4	1317500	1331999	49	16	1.62812	0.614204	0.000230583	1	0.00103721	1
chr4	1831000	1842499	39	12	1.70327	0.587107	0.0002691	1	0.00118491	1
chr4	2644000	2656999	47	19	1.32855	0.752701	0.0157278	1	0.0445317	1
chr4	3380000	3397999	57	22	1.39594	0.716363	0.00386846	1	0.0126218	1
chr4	3472500	3484999	56	17	1.75295	0.570468	1.40988e-05	1	8.74044e-05	1
chr4	4263000	4270999	31	11	1.47617	0.677431	0.00742305	1	0.0225433	1
chr4	4613500	4621499	31	6	2.53057	0.395168	1.45257e-07	1	1.57658e-06	1
chr4	4692000	4699499	32	9	1.82676	0.547419	0.000173504	1	0.000808899	1
chr4	4860500	4869999	38	10	1.96263	0.50952	1.30594e-05	1	8.1967e-05	1
chr4	5390000	5399499	37	6	3.00505	0.332773	1.10537e-10	1	2.83069e-09	1
chr4	5572500	5579499	34	10	1.76133	0.567751	0.000264113	1	0.00116993	1
chr4	6588000	6597499	36	13	1.46299	0.683534	0.0059706	1	0.0185291	1
chr4	6761000	6780999	66	24	1.48355	0.67406	0.00051921	1	0.00211356	1
chr4	7035000	7041499	31	11	1.47617	0.677431	0.00742305	1	0.0225433	1
chr4	7222000	7232999	39	14	1.47617	0.677431	0.00415423	1	0.0134809	1
chr4	7269000	7281499	66	10	3.3717	0.296587	8.58512e-19	1	1.66969e-16	1
chr4	7456000	7466499	34	12	1.49036	0.670979	0.0051377	1	0.0162313	1
chr4	7980000	7984499	30	8	1.90671	0.524462	0.000104544	1	0.000512902	1
chr4	8013500	8019499	29	5	2.76781	0.361296	2.98632e-08	1	3.86155e-07	1
chr4	9772500	9780999	34	10	1.76133	0.567751	0.000264113	1	0.00116993	1
chr4	10168000	10174999	35	5	3.32137	0.30108	1.08659e-11	1	3.47903e-10	1
chr4	10971000	10984499	45	8	2.82932	0.353442	3.14352e-11	1	9.31856e-10	1
chr4	13291000	13299999	33	9	1.88211	0.531318	8.10515e-05	1	0.000412991	1
chr4	13713500	13721499	34	4	3.87494	0.258069	1.01261e-13	1	6.24133e-12	1
chr4	13786500	13799499	44	13	1.77931	0.562016	5.12214e-05	1	0.000275426	1
chr4	13827500	13839999	42	11	1.9836	0.504134	4.65116e-06	1	3.29103e-05	1
chr4	14284000	14289499	27	4	3.09995	0.322586	3.54518e-09	1	5.89171e-08	1
chr4	14334000	14342999	35	13	1.42345	0.702521	0.00975806	1	0.0288878	1
chr4	16535500	16542499	33	7	2.35264	0.425054	4.9524e-07	1	4.57771e-06	1
chr4	17451500	17463999	43	13	1.73977	0.57479	0.000100256	1	0.000495069	1
chr4	18297500	18309499	38	11	1.79908	0.55584	9.55922e-05	1	0.000478194	1
chr4	18568000	18577999	35	10	1.81166	0.55198	0.000129375	1	0.000626817	1
chr4	20721500	20730999	34	5	3.22911	0.309683	4.3688e-11	1	1.24754e-09	1
chr4	20816500	20830999	41	7	2.9062	0.344092	6.18355e-11	1	1.64195e-09	1
chr4	22760000	22768999	33	8	2.09124	0.478186	8.25577e-06	1	5.50333e-05	1
chr4	22871500	22883499	39	12	1.70327	0.587107	0.0002691	1	0.00118491	1
chr4	24414500	24424499	34	10	1.76133	0.567751	0.000264113	1	0.00116993	1
chr4	24610000	24618999	39	12	1.70327	0.587107	0.0002691	1	0.00118491	1
chr4	25426000	25435999	38	7	2.69862	0.37056	2.17177e-09	1	3.8564e-08	1
chr4	25845500	25854499	38	13	1.54207	0.648481	0.00208101	1	0.00723165	1
chr4	26451000	26455999	24	2	4.61302	0.216778	1.78411e-13	1	9.58091e-12	1
chr4	26892500	26905999	40	15	1.4185	0.704968	0.00761242	1	0.0230115	1
chr4	28869500	28877999	34	6	2.76781	0.361296	4.53392e-09	1	7.25024e-08	1
chr4	29435500	29441999	29	6	2.37241	0.421512	1.26426e-06	1	1.04661e-05	1
chr4	30372500	30384499	32	9	1.82676	0.547419	0.000173504	1	0.000808899	1
chr4	31128000	31139999	42	12	1.83101	0.546146	3.46396e-05	1	0.000194892	1
chr4	32257500	32270499	43	17	1.35315	0.739015	0.0139453	1	0.040096	1
chr4	35263500	35277999	51	17	1.59918	0.625321	0.000286988	1	0.00125542	1
chr4	35799000	35809499	39	14	1.47617	0.677431	0.00415423	1	0.0134809	1
chr4	37692500	37700999	37	11	1.75295	0.570468	0.000191993	1	0.000881814	1
chr4	37725500	37732499	30	7	2.14505	0.466189	9.25351e-06	1	6.04386e-05	1
chr4	38812000	38823499	39	10	2.01295	0.496782	5.79039e-06	1	4.03365e-05	1
chr4	39028000	39042499	43	7	3.04459	0.328451	5.1341e-12	1	1.873e-10	1
chr4	39279500	39291999	47	12	2.04392	0.489255	7.39459e-07	1	6.55717e-06	1
chr4	40745500	40754499	33	6	2.68873	0.371923	1.48152e-08	1	2.09348e-07	1
chr4	40929000	40933499	25	3	3.59815	0.27792	1.65932e-10	1	4.11032e-09	1
chr4	41128000	41145499	55	11	2.58329	0.387103	2.52884e-11	1	7.78503e-10	1
chr4	41933000	41943499	39	14	1.47617	0.677431	0.00415423	1	0.0134809	1
chr4	42006500	42015999	38	9	2.15889	0.4632	1.21188e-06	1	1.02086e-05	1
chr4	44615000	44626499	37	10	1.91231	0.522929	2.87523e-05	1	0.000163526	1
chr4	44982000	44996499	48	13	1.93747	0.516138	2.8462e-06	1	2.1725e-05	1
chr4	48115500	48123999	37	14	1.40236	0.713085	0.0108758	1	0.0317721	1
chr4	52686000	52695999	36	13	1.46299	0.683534	0.0059706	1	0.0185291	1
chr4	52887000	52893999	33	6	2.68873	0.371923	1.48152e-08	1	2.09348e-07	1
chr4	53708000	53715999	32	10	1.66069	0.602161	0.00101649	1	0.00382667	1
chr4	53771500	53780999	37	7	2.62942	0.380312	6.77502e-09	1	1.05526e-07	1
chr4	55781500	55791499	38	8	2.39877	0.41688	6.95992e-08	1	8.22053e-07	1
chr4	56094000	56103499	32	12	1.4052	0.711644	0.0140392	1	0.0402536	1
chr4	56546000	56551499	33	4	3.76422	0.265659	4.93938e-13	1	2.33457e-11	1
chr4	57419000	57429499	35	9	1.99282	0.5018	1.63056e-05	1	0.000100201	1
chr4	57988500	57995999	34	6	2.76781	0.361296	4.53392e-09	1	7.25024e-08	1
chr4	58337500	58349499	39	12	1.70327	0.587107	0.0002691	1	0.00118491	1
chr4	59237000	59246499	38	11	1.79908	0.55584	9.55922e-05	1	0.000478194	1
chr4	60553500	60567999	44	11	2.07586	0.481728	8.97638e-07	1	7.86055e-06	1
chr4	61919000	61925999	33	3	4.70528	0.212527	1.59709e-16	1	1.87635e-14	1
chr4	62747500	62755499	39	6	3.16321	0.316134	8.17577e-12	1	2.83874e-10	1
chr4	64182500	64190999	38	5	3.59815	0.27792	1.42662e-13	1	7.83659e-12	1
chr4	65903000	65913999	40	8	2.52178	0.396545	8.64196e-09	1	1.2902e-07	1
chr4	66942500	66953499	37	14	1.40236	0.713085	0.0108758	1	0.0317721	1
chr4	69760500	69769499	33	6	2.68873	0.371923	1.48152e-08	1	2.09348e-07	1
chr4	70504000	70516999	47	17	1.47617	0.677431	0.00232547	1	0.00801249	1
chr4	70600500	70612999	41	14	1.54997	0.645172	0.00145116	1	0.00524618	1
chr4	70625000	70636999	38	13	1.54207	0.648481	0.00208101	1	0.00723165	1
chr4	71183000	71193999	38	4	4.31779	0.2316	1.36493e-16	1	1.71563e-14	1
chr4	77985500	77993999	36	14	1.36545	0.732357	0.0170023	1	0.0479094	1
chr4	78318500	78329499	50	13	2.01655	0.495897	5.9662e-07	1	5.36827e-06	1
chr4	79604000	79612499	42	2	7.93439	0.126034	4.73183e-31	1	1.13501e-27	1
chr4	80069000	80078499	39	8	2.46028	0.406458	2.48204e-08	1	3.31214e-07	1
chr4	80259500	80265499	31	6	2.53057	0.395168	1.45257e-07	1	1.57658e-06	1
chr4	80372000	80376999	31	8	1.96822	0.508073	4.61663e-05	1	0.000252537	1
chr4	80442000	80447499	29	8	1.84521	0.541944	0.000229768	1	0.00103743	1
chr4	81474000	81482499	30	6	2.45149	0.407915	4.35149e-07	1	4.18069e-06	1
chr4	81838000	81848499	49	8	3.07535	0.325167	2.39986e-13	1	1.20344e-11	1
chr4	82119000	82126999	33	12	1.44778	0.690714	0.00860346	1	0.0257344	1
chr4	82685000	82692999	37	14	1.40236	0.713085	0.0108758	1	0.0317721	1
chr4	82724500	82731499	33	4	3.76422	0.265659	4.93938e-13	1	2.33457e-11	1
chr4	82959000	82967999	35	9	1.99282	0.5018	1.63056e-05	1	0.000100201	1
chr4	83498500	83508999	38	9	2.15889	0.4632	1.21188e-06	1	1.02086e-05	1
chr4	83591000	83601499	31	10	1.61036	0.620978	0.00191403	1	0.0067376	1
chr4	84684000	84694999	36	9	2.04818	0.488238	7.03096e-06	1	4.79913e-05	1
chr4	85756500	85765499	38	12	1.66069	0.602161	0.000509233	1	0.00208148	1
chr4	86261000	86263999	21	5	2.02973	0.492677	0.000183704	1	0.000848208	1
chr4	87884000	87893999	41	8	2.58329	0.387103	2.93932e-09	1	4.99737e-08	1
chr4	88529000	88548499	68	20	1.81885	0.549799	7.5385e-07	1	6.65404e-06	1
chr4	88566500	88574499	32	9	1.82676	0.547419	0.000173504	1	0.000808899	1
chr4	88728000	88736499	34	7	2.42183	0.41291	1.76311e-07	1	1.85691e-06	1
chr4	88803000	88815499	51	12	2.21425	0.45162	2.37903e-08	1	3.21191e-07	1
chr4	89105500	89115499	39	14	1.47617	0.677431	0.00415423	1	0.0134809	1
chr4	90132000	90146499	51	9	2.87852	0.3474	1.46556e-12	1	6.05232e-11	1
chr4	91565000	91574499	42	8	2.6448	0.378101	9.77093e-10	1	1.85641e-08	1
chr4	92824000	92826999	22	3	3.18298	0.314171	1.67717e-08	1	2.33781e-07	1
chr4	97617000	97625999	32	7	2.28344	0.437935	1.35275e-06	1	1.08764e-05	1
chr4	97692500	97700999	31	9	1.7714	0.564525	0.000361158	1	0.0015442	1
chr4	98560500	98568499	32	8	2.02973	0.492677	1.98017e-05	1	0.00011867	1
chr4	100351500	100365999	47	8	2.95233	0.338715	2.86003e-12	1	1.06498e-10	1
chr4	100561500	100571999	34	12	1.49036	0.670979	0.0051377	1	0.0162313	1
chr4	100975000	100987499	54	15	1.90287	0.525522	1.66015e-06	1	1.31859e-05	1
chr4	101957000	101962999	30	5	2.86007	0.349642	8.59546e-09	1	1.3056e-07	1
chr4	102049500	102061999	39	12	1.70327	0.587107	0.0002691	1	0.00118491	1
chr4	102555500	102568499	42	14	1.58688	0.630168	0.000830177	1	0.00321829	1
chr4	103094500	103103999	37	6	3.00505	0.332773	1.10537e-10	1	2.83069e-09	1
chr4	103974500	103986499	39	15	1.38391	0.722593	0.0119492	1	0.0346372	1
chr4	104738000	104752999	54	20	1.44981	0.689748	0.002077	1	0.00724834	1
chr4	104997500	105006999	31	9	1.7714	0.564525	0.000361158	1	0.0015442	1
chr4	105898000	105910499	49	13	1.97701	0.505815	1.31555e-06	1	1.08005e-05	1
chr4	105990500	105996999	32	11	1.5223	0.656902	0.00431081	1	0.0138686	1
chr4	107613000	107622999	37	8	2.33726	0.427851	1.9044e-07	1	1.94798e-06	1
chr4	107749000	107760499	55	6	4.4285	0.22581	3.09886e-22	1	1.17365e-19	1
chr4	107849500	107869999	69	28	1.33618	0.7484	0.00557509	1	0.0174522	1
chr4	108045500	108052999	34	13	1.38391	0.722593	0.015564	1	0.044277	1
chr4	108474500	108487499	49	19	1.38391	0.722593	0.00704844	1	0.0215077	1
chr4	108869500	108889999	62	18	1.8355	0.544812	1.39712e-06	1	1.11367e-05	1
chr4	108941500	108949499	32	9	1.82676	0.547419	0.000173504	1	0.000808899	1
chr4	109280500	109285999	26	6	2.13517	0.468347	2.55602e-05	1	0.000148212	1
chr4	109803000	109811999	42	16	1.40019	0.71419	0.00840617	1	0.0252308	1
chr4	110878000	110889999	38	10	1.96263	0.50952	1.30594e-05	1	8.1967e-05	1
chr4	111004500	111011999	38	14	1.43926	0.694801	0.00679838	1	0.0208109	1
chr4	112125000	112143999	71	26	1.47617	0.677431	0.000413601	1	0.00173266	1
chr4	112342000	112350499	42	15	1.4877	0.672179	0.00289696	1	0.00972205	1
chr4	112925000	112934999	41	9	2.32496	0.430115	7.23576e-08	1	8.32431e-07	1
chr4	113092000	113094999	23	4	2.6571	0.37635	6.73189e-07	1	6.00839e-06	1
chr4	113507500	113518499	33	11	1.56843	0.637582	0.00243675	1	0.0083539	1
chr4	113586500	113589499	24	5	2.30651	0.433556	9.18142e-06	1	6.04478e-05	1
chr4	113742000	113759499	49	18	1.45674	0.686463	0.00263243	1	0.00892273	1
chr4	113805000	113817499	39	13	1.58161	0.632269	0.00118641	1	0.00441837	1
chr4	117984500	117992999	32	12	1.4052	0.711644	0.0140392	1	0.0402536	1
chr4	118064500	118075499	37	10	1.91231	0.522929	2.87523e-05	1	0.000163526	1
chr4	118359000	118365999	35	6	2.84689	0.35126	1.34998e-09	1	2.49408e-08	1
chr4	118886500	118890499	25	3	3.59815	0.27792	1.65932e-10	1	4.11032e-09	1
chr4	119294000	119300499	25	9	1.43926	0.694801	0.0156729	1	0.0444593	1
chr4	119525500	119538499	47	12	2.04392	0.489255	7.39459e-07	1	6.55717e-06	1
chr4	119594000	119613999	69	12	2.98072	0.335489	1.5317e-16	1	1.86816e-14	1
chr4	120526500	120534999	38	7	2.69862	0.37056	2.17177e-09	1	3.8564e-08	1
chr4	120773500	120776499	21	5	2.02973	0.492677	0.000183704	1	0.000848208	1
chr4	121012000	121020999	35	11	1.66069	0.602161	0.000719594	1	0.00282884	1
chr4	121509500	121526499	54	13	2.17471	0.459832	2.10058e-08	1	2.85338e-07	1
chr4	122949500	122959499	46	11	2.16812	0.461229	1.59205e-07	1	1.70165e-06	1
chr4	123572000	123579999	36	12	1.57552	0.63471	0.00169855	1	0.00606365	1
chr4	124039000	124050499	37	14	1.40236	0.713085	0.0108758	1	0.0317721	1
chr4	124897500	124909499	42	13	1.70023	0.588157	0.000192126	1	0.000877244	1
chr4	125354500	125360499	30	7	2.14505	0.466189	9.25351e-06	1	6.04386e-05	1
chr4	127410500	127420499	36	6	2.92597	0.341767	3.91358e-10	1	8.54693e-09	1
chr4	127573500	127580499	31	4	3.5428	0.282263	1.07796e-11	1	3.55012e-10	1
chr4	128199000	128213499	49	11	2.30651	0.433556	1.02201e-08	1	1.49403e-07	1
chr4	128480000	128492499	55	20	1.47617	0.677431	0.00130447	1	0.00482496	1
chr4	128939000	128947999	39	11	1.84521	0.541944	4.6474e-05	1	0.000252112	1
chr4	130273500	130282999	32	6	2.60965	0.383193	4.70662e-08	1	5.9263e-07	1
chr4	130683500	130695499	36	6	2.92597	0.341767	3.91358e-10	1	8.54693e-09	1
chr4	133014000	133015999	21	4	2.43567	0.410564	7.36221e-06	1	4.98973e-05	1
chr4	134554000	134568999	44	15	1.55689	0.642305	0.00101398	1	0.00383729	1
chr4	134616500	134627499	36	11	1.70682	0.585886	0.000376341	1	0.00159467	1
chr4	136334000	136345499	41	12	1.78843	0.559149	7.01539e-05	1	0.000363512	1
chr4	137058000	137065999	33	7	2.35264	0.425054	4.9524e-07	1	4.57771e-06	1
chr4	137138000	137148499	37	8	2.33726	0.427851	1.9044e-07	1	1.94798e-06	1
chr4	137375000	137387999	43	16	1.43275	0.697959	0.00533619	1	0.0167682	1
chr4	137654500	137658999	26	7	1.86827	0.535254	0.000298849	1	0.00130196	1
chr4	138186500	138196499	35	12	1.53294	0.652341	0.00299113	1	0.00997414	1
chr4	138729000	138752499	75	27	1.50253	0.665546	0.000184678	1	0.000852022	1
chr4	139208000	139214999	30	9	1.71604	0.582736	0.000730501	1	0.00285147	1
chr4	140067000	140079499	40	13	1.62115	0.616847	0.000661184	1	0.00263266	1
chr4	140094000	140099499	27	7	1.93747	0.516138	0.000131603	1	0.000632292	1
chr4	140265500	140267999	2	21	0.0754858	13.2475	1	5.33027e-11	1	1.53426e-07
chr4	140713500	140722499	38	9	2.15889	0.4632	1.21188e-06	1	1.02086e-05	1
chr4	141352000	141363999	38	14	1.43926	0.694801	0.00679838	1	0.0208109	1
chr4	142815000	142822499	34	5	3.22911	0.309683	4.3688e-11	1	1.24754e-09	1
chr4	144882500	144894999	39	9	2.21425	0.45162	4.84974e-07	1	4.53967e-06	1
chr4	145497000	145506499	38	12	1.66069	0.602161	0.000509233	1	0.00208148	1
chr4	146576500	146586999	36	9	2.04818	0.488238	7.03096e-06	1	4.79913e-05	1
chr4	146847000	146847999	16	2	3.13685	0.318791	2.88043e-07	1	2.84915e-06	1
chr4	147582000	147587499	28	7	2.00666	0.49834	5.60715e-05	1	0.000298274	1
chr4	149309500	149319999	37	8	2.33726	0.427851	1.9044e-07	1	1.94798e-06	1
chr4	149507000	149515999	38	13	1.54207	0.648481	0.00208101	1	0.00723165	1
chr4	149967000	149976499	30	6	2.45149	0.407915	4.35149e-07	1	4.18069e-06	1
chr4	150200000	150209999	35	13	1.42345	0.702521	0.00975806	1	0.0288878	1
chr4	152082500	152097499	49	12	2.12909	0.469685	1.37804e-07	1	1.52266e-06	1
chr4	152697500	152702999	28	7	2.00666	0.49834	5.60715e-05	1	0.000298274	1
chr4	153073500	153079499	32	5	3.04459	0.328451	6.49619e-10	1	1.32426e-08	1
chr4	153180500	153193999	56	15	1.97207	0.507083	3.7069e-07	1	3.61325e-06	1
chr4	153784500	153794499	41	12	1.78843	0.559149	7.01539e-05	1	0.000363512	1
chr4	154526000	154534999	34	11	1.61456	0.619365	0.00134145	1	0.00493764	1
chr4	155455500	155461499	25	8	1.59918	0.625321	0.0039101	1	0.0127346	1
chr4	158070500	158077999	25	7	1.79908	0.55584	0.000655946	1	0.00262598	1
chr4	158240000	158245999	30	4	3.43209	0.291368	4.81474e-11	1	1.31737e-09	1
chr4	158264000	158268999	28	9	1.60533	0.622925	0.00273419	1	0.00923287	1
chr4	164795000	164807999	49	11	2.30651	0.433556	1.02201e-08	1	1.49403e-07	1
chr4	165683000	165692499	42	12	1.83101	0.546146	3.46396e-05	1	0.000194892	1
chr4	168712500	168720999	37	13	1.50253	0.665546	0.00356666	1	0.0117088	1
chr4	168854500	168862999	31	9	1.7714	0.564525	0.000361158	1	0.0015442	1
chr4	168993500	169003499	41	15	1.4531	0.688183	0.00474618	1	0.0151541	1
chr4	169116000	169124999	32	6	2.60965	0.383193	4.70662e-08	1	5.9263e-07	1
chr4	169846000	169872999	97	31	1.69528	0.589872	2.41699e-07	1	2.41313e-06	1
chr4	172323500	172333999	34	5	3.22911	0.309683	4.3688e-11	1	1.24754e-09	1
chr4	173024000	173039999	60	23	1.40697	0.710747	0.00276092	1	0.0093002	1
chr4	173083500	173095499	48	13	1.93747	0.516138	2.8462e-06	1	2.1725e-05	1
chr4	174011000	174016499	29	4	3.32137	0.30108	2.08459e-10	1	4.7773e-09	1
chr4	175550000	175558499	40	5	3.78268	0.264363	7.0019e-15	1	5.56748e-13	1
chr4	176312500	176322499	31	10	1.61036	0.620978	0.00191403	1	0.0067376	1
chr4	178023500	178037499	50	11	2.35264	0.425054	3.93598e-09	1	6.36837e-08	1
chr4	181069000	181074999	32	8	2.02973	0.492677	1.98017e-05	1	0.00011867	1
chr4	181099500	181107999	30	3	4.29011	0.233094	3.66433e-14	1	2.47012e-12	1
chr4	183337500	183350999	47	16	1.563	0.639796	0.000709767	1	0.00280785	1
chr4	183839500	183848499	38	5	3.59815	0.27792	1.42662e-13	1	7.83659e-12	1
chr4	184688500	184697999	36	5	3.41363	0.292943	2.63085e-12	1	9.95089e-11	1
chr4	185037000	185044999	33	2	6.27371	0.159395	9.44638e-22	1	3.39881e-19	1
chr4	185814000	185824999	39	12	1.70327	0.587107	0.0002691	1	0.00118491	1
chr4	186027000	186045999	60	18	1.77723	0.562675	5.32601e-06	1	3.74003e-05	1
chr4	186230000	186236999	32	5	3.04459	0.328451	6.49619e-10	1	1.32426e-08	1
chr4	186551500	186554999	22	2	4.24398	0.235628	8.31006e-12	1	2.85779e-10	1
chr4	186774000	186780499	34	11	1.61456	0.619365	0.00134145	1	0.00493764	1
chr4	187250000	187255499	27	4	3.09995	0.322586	3.54518e-09	1	5.89171e-08	1
chr4	189143500	189148499	34	6	2.76781	0.361296	4.53392e-09	1	7.25024e-08	1
chr5	488500	506499	61	24	1.37283	0.72842	0.00446603	1	0.0143168	1
chr5	1292000	1304499	53	20	1.42345	0.702521	0.00325301	1	0.0108061	1
chr5	1437500	1446999	42	12	1.83101	0.546146	3.46396e-05	1	0.000194892	1
chr5	1679000	1700499	77	21	1.96263	0.50952	8.25081e-09	1	1.26594e-07	1
chr5	1890000	1901999	46	9	2.60174	0.384358	4.21117e-10	1	9.00553e-09	1
chr5	3398500	3407999	32	7	2.28344	0.437935	1.35275e-06	1	1.08764e-05	1
chr5	4207500	4214499	32	5	3.04459	0.328451	6.49619e-10	1	1.32426e-08	1
chr5	5544000	5554999	35	7	2.49103	0.40144	6.1083e-08	1	7.40924e-07	1
chr5	6251500	6273499	77	25	1.66069	0.602161	5.81067e-06	1	4.02151e-05	1
chr5	6317500	6330999	60	14	2.25115	0.444217	1.30632e-09	1	2.44004e-08	1
chr5	6864000	6872999	32	6	2.60965	0.383193	4.70662e-08	1	5.9263e-07	1
chr5	7030000	7040999	36	9	2.04818	0.488238	7.03096e-06	1	4.79913e-05	1
chr5	7663000	7674499	40	7	2.83701	0.352484	2.07365e-10	1	4.86454e-09	1
chr5	8220000	8230499	34	11	1.61456	0.619365	0.00134145	1	0.00493764	1
chr5	8505000	8510499	31	3	4.4285	0.22581	6.16845e-15	1	5.02982e-13	1
chr5	8547500	8556499	34	7	2.42183	0.41291	1.76311e-07	1	1.85691e-06	1
chr5	10849000	10859499	49	10	2.51619	0.397426	5.01969e-10	1	1.05465e-08	1
chr5	14792500	14805999	36	12	1.57552	0.63471	0.00169855	1	0.00606365	1
chr5	15625500	15636499	40	11	1.89134	0.528726	2.20729e-05	1	0.000130461	1
chr5	15639500	15645499	28	10	1.45939	0.685217	0.0107631	1	0.0315807	1
chr5	16688000	16695999	37	10	1.91231	0.522929	2.87523e-05	1	0.000163526	1
chr5	16993000	16998999	22	6	1.81885	0.549799	0.000862498	1	0.003323	1
chr5	20344500	20352999	33	7	2.35264	0.425054	4.9524e-07	1	4.57771e-06	1
chr5	21818000	21829999	33	10	1.71101	0.58445	0.000525164	1	0.00212996	1
chr5	23797000	23808499	40	10	2.06328	0.484666	2.50757e-06	1	1.93714e-05	1
chr5	23930000	23937999	33	3	4.70528	0.212527	1.59709e-16	1	1.87635e-14	1
chr5	25749500	25759999	38	11	1.79908	0.55584	9.55922e-05	1	0.000478194	1
chr5	28397500	28408499	48	15	1.69528	0.589872	9.76555e-05	1	0.000484557	1
chr5	28483000	28494499	51	19	1.43926	0.694801	0.00294239	1	0.00984353	1
chr5	30988500	30996999	30	9	1.71604	0.582736	0.000730501	1	0.00285147	1
chr5	31385000	31398999	60	14	2.25115	0.444217	1.30632e-09	1	2.44004e-08	1
chr5	31407500	31417999	44	13	1.77931	0.562016	5.12214e-05	1	0.000275426	1
chr5	31645000	31653499	35	9	1.99282	0.5018	1.63056e-05	1	0.000100201	1
chr5	31882000	31887999	25	8	1.59918	0.625321	0.0039101	1	0.0127346	1
chr5	32339000	32345499	30	5	2.86007	0.349642	8.59546e-09	1	1.3056e-07	1
chr5	33205000	33212999	31	3	4.4285	0.22581	6.16845e-15	1	5.02982e-13	1
chr5	33938000	33942499	23	6	1.89793	0.52689	0.000378453	1	0.00159517	1
chr5	34725000	34752499	83	27	1.66069	0.602161	2.93499e-06	1	2.23317e-05	1
chr5	35302500	35313999	45	14	1.69759	0.58907	0.000137025	1	0.000654734	1
chr5	35936000	35944999	33	10	1.71101	0.58445	0.000525164	1	0.00212996	1
chr5	36701000	36710499	36	12	1.57552	0.63471	0.00169855	1	0.00606365	1
chr5	36738500	36747499	37	13	1.50253	0.665546	0.00356666	1	0.0117088	1
chr5	37108000	37118499	41	11	1.93747	0.516138	1.02465e-05	1	6.53091e-05	1
chr5	37592500	37598999	32	5	3.04459	0.328451	6.49619e-10	1	1.32426e-08	1
chr5	38676500	38681999	25	4	2.87852	0.3474	5.25709e-08	1	6.48886e-07	1
chr5	38763000	38770499	35	4	3.98565	0.2509	2.01911e-14	1	1.50176e-12	1
chr5	38798000	38810999	46	17	1.44541	0.691844	0.00374565	1	0.0122475	1
chr5	40286500	40299499	43	10	2.21425	0.45162	1.77654e-07	1	1.85141e-06	1
chr5	40650000	40653499	22	4	2.54639	0.392713	2.27229e-06	1	1.76724e-05	1
chr5	41972000	41979499	26	6	2.13517	0.468347	2.55602e-05	1	0.000148212	1
chr5	42112500	42116999	26	5	2.49103	0.40144	1.03035e-06	1	8.90083e-06	1
chr5	42603500	42609499	30	3	4.29011	0.233094	3.66433e-14	1	2.47012e-12	1
chr5	42874500	42910499	127	46	1.50757	0.663317	2.96041e-06	1	2.22487e-05	1
chr5	44324500	44336499	41	12	1.78843	0.559149	7.01539e-05	1	0.000363512	1
chr5	45722500	45733499	36	7	2.56023	0.390591	2.0608e-08	1	2.82602e-07	1
chr5	51410000	51416999	30	7	2.14505	0.466189	9.25351e-06	1	6.04386e-05	1
chr5	51962500	51974499	41	11	1.93747	0.516138	1.02465e-05	1	6.53091e-05	1
chr5	52976500	52982999	29	6	2.37241	0.421512	1.26426e-06	1	1.04661e-05	1
chr5	53037500	53043999	26	7	1.86827	0.535254	0.000298849	1	0.00130196	1
chr5	54582000	54596499	46	14	1.7345	0.576537	7.21563e-05	1	0.000371348	1
chr5	54825000	54832499	32	8	2.02973	0.492677	1.98017e-05	1	0.00011867	1
chr5	54867000	54875499	34	5	3.22911	0.309683	4.3688e-11	1	1.24754e-09	1
chr5	55724000	55733499	39	9	2.21425	0.45162	4.84974e-07	1	4.53967e-06	1
chr5	57341000	57346999	31	6	2.53057	0.395168	1.45257e-07	1	1.57658e-06	1
chr5	58876000	58886999	36	10	1.86198	0.537062	6.17629e-05	1	0.000324709	1
chr5	59153000	59162499	34	9	1.93747	0.516138	3.6842e-05	1	0.000205476	1
chr5	60461000	60465499	27	9	1.54997	0.645172	0.00505203	1	0.0160275	1
chr5	62208500	62219999	34	13	1.38391	0.722593	0.015564	1	0.044277	1
chr5	63843000	63855499	41	10	2.1136	0.473126	1.06115e-06	1	9.07429e-06	1
chr5	65842000	65855499	43	16	1.43275	0.697959	0.00533619	1	0.0167682	1
chr5	66190500	66208499	59	22	1.44408	0.692485	0.00163308	1	0.00585971	1
chr5	67096500	67103999	35	4	3.98565	0.2509	2.01911e-14	1	1.50176e-12	1
chr5	67153500	67160999	38	6	3.08413	0.32424	3.04371e-11	1	9.17385e-10	1
chr5	69112500	69120499	33	6	2.68873	0.371923	1.48152e-08	1	2.09348e-07	1
chr5	69277000	69284999	31	8	1.96822	0.508073	4.61663e-05	1	0.000252537	1
chr5	72112000	72130499	63	24	1.41712	0.705657	0.00197017	1	0.00691326	1
chr5	72383500	72398999	46	15	1.62609	0.614972	0.000327273	1	0.00141999	1
chr5	72458500	72472999	54	17	1.69144	0.591212	4.9537e-05	1	0.000267669	1
chr5	72642000	72654999	46	18	1.36934	0.73028	0.00991475	1	0.0292494	1
chr5	73171000	73201999	95	41	1.26529	0.790336	0.00816338	1	0.0245584	1
chr5	73401500	73409499	38	9	2.15889	0.4632	1.21188e-06	1	1.02086e-05	1
chr5	73746500	73754499	29	4	3.32137	0.30108	2.08459e-10	1	4.7773e-09	1
chr5	73770000	73778499	32	8	2.02973	0.492677	1.98017e-05	1	0.00011867	1
chr5	74067500	74073999	34	5	3.22911	0.309683	4.3688e-11	1	1.24754e-09	1
chr5	74389500	74405999	66	19	1.85443	0.539248	5.19053e-07	1	4.69529e-06	1
chr5	74424000	74431999	30	11	1.43004	0.699283	0.0124349	1	0.0359616	1
chr5	75035500	75040499	29	2	5.53562	0.180648	6.26239e-18	1	1.03004e-15	1
chr5	75578500	75592499	42	14	1.58688	0.630168	0.000830177	1	0.00321829	1
chr5	76078500	76085499	25	6	2.05609	0.48636	6.5071e-05	1	0.000339435	1
chr5	77240500	77257999	54	22	1.32374	0.755438	0.0125527	1	0.0362624	1
chr5	78086500	78095999	41	16	1.36762	0.731195	0.0129734	1	0.0374324	1
chr5	78834000	78843999	42	9	2.38032	0.420112	2.70042e-08	1	3.55088e-07	1
chr5	79395000	79403999	35	13	1.42345	0.702521	0.00975806	1	0.0288878	1
chr5	79828000	79836999	35	7	2.49103	0.40144	6.1083e-08	1	7.40924e-07	1
chr5	79934000	79939499	25	4	2.87852	0.3474	5.25709e-08	1	6.48886e-07	1
chr5	80606000	80618499	41	14	1.54997	0.645172	0.00145116	1	0.00524618	1
chr5	80912000	80917499	28	8	1.7837	0.560632	0.000489714	1	0.0020215	1
chr5	81330000	81343999	48	19	1.35623	0.737339	0.0106237	1	0.0312353	1
chr5	81390000	81398999	28	8	1.7837	0.560632	0.000489714	1	0.0020215	1
chr5	82885000	82894999	34	11	1.61456	0.619365	0.00134145	1	0.00493764	1
chr5	83335500	83343499	36	11	1.70682	0.585886	0.000376341	1	0.00159467	1
chr5	83492500	83509499	47	18	1.39847	0.715066	0.00649096	1	0.0199696	1
chr5	84645500	84650999	31	5	2.95233	0.338715	2.39873e-09	1	4.1719e-08	1
chr5	86976500	86981999	27	4	3.09995	0.322586	3.54518e-09	1	5.89171e-08	1
chr5	87680000	87688499	34	11	1.61456	0.619365	0.00134145	1	0.00493764	1
chr5	87822000	87830999	38	5	3.59815	0.27792	1.42662e-13	1	7.83659e-12	1
chr5	88662500	88668999	25	9	1.43926	0.694801	0.0156729	1	0.0444593	1
chr5	90728500	90735499	30	4	3.43209	0.291368	4.81474e-11	1	1.31737e-09	1
chr5	91230500	91235999	35	3	4.98206	0.20072	3.68684e-18	1	6.63262e-16	1
chr5	91247000	91256499	46	15	1.62609	0.614972	0.000327273	1	0.00141999	1
chr5	91383000	91399499	56	21	1.43423	0.697238	0.00230438	1	0.00796174	1
chr5	91432000	91452999	70	25	1.51165	0.661528	0.00022897	1	0.00103741	1
chr5	92821500	92836999	48	9	2.71246	0.36867	4.64121e-11	1	1.2945e-09	1
chr5	94768500	94781499	49	14	1.84521	0.541944	9.36659e-06	1	6.07498e-05	1
chr5	95135500	95141499	35	9	1.99282	0.5018	1.63056e-05	1	0.000100201	1
chr5	95942000	95950999	29	10	1.50972	0.662377	0.00623225	1	0.0192271	1
chr5	96055000	96067499	53	13	2.13517	0.468347	4.98162e-08	1	6.18865e-07	1
chr5	96472500	96476999	25	9	1.43926	0.694801	0.0156729	1	0.0444593	1
chr5	96830500	96841499	41	13	1.66069	0.602161	0.000360341	1	0.00155224	1
chr5	97635000	97640999	31	7	2.21425	0.45162	3.59057e-06	1	2.60395e-05	1
chr5	98495500	98505499	43	14	1.62378	0.615846	0.000464943	1	0.00193423	1
chr5	98828500	98836499	38	3	5.39723	0.18528	1.05679e-20	1	2.71595e-18	1
chr5	100716500	100725999	38	6	3.08413	0.32424	3.04371e-11	1	9.17385e-10	1
chr5	101340000	101349499	35	11	1.66069	0.602161	0.000719594	1	0.00282884	1
chr5	101632000	101647499	41	8	2.58329	0.387103	2.93932e-09	1	4.99737e-08	1
chr5	102693500	102703499	38	14	1.43926	0.694801	0.00679838	1	0.0208109	1
chr5	103473000	103481499	33	8	2.09124	0.478186	8.25577e-06	1	5.50333e-05	1
chr5	103995500	104002999	31	5	2.95233	0.338715	2.39873e-09	1	4.1719e-08	1
chr5	104417000	104427499	40	4	4.53921	0.220303	4.30123e-18	1	7.50342e-16	1
chr5	105258000	105262499	27	4	3.09995	0.322586	3.54518e-09	1	5.89171e-08	1
chr5	106756000	106769499	46	16	1.53044	0.653408	0.00121029	1	0.00449164	1
chr5	107517500	107525999	38	8	2.39877	0.41688	6.95992e-08	1	8.22053e-07	1
chr5	108352000	108361499	37	7	2.62942	0.380312	6.77502e-09	1	1.05526e-07	1
chr5	108889000	108895999	33	11	1.56843	0.637582	0.00243675	1	0.0083539	1
chr5	109414000	109423499	38	9	2.15889	0.4632	1.21188e-06	1	1.02086e-05	1
chr5	109605000	109618999	49	19	1.38391	0.722593	0.00704844	1	0.0215077	1
chr5	113190000	113200999	46	13	1.85839	0.538101	1.25676e-05	1	7.95398e-05	1
chr5	113422000	113430999	40	5	3.78268	0.264363	7.0019e-15	1	5.56748e-13	1
chr5	113673000	113686999	43	16	1.43275	0.697959	0.00533619	1	0.0167682	1
chr5	115805000	115814499	39	4	4.4285	0.22581	2.45275e-17	1	3.73545e-15	1
chr5	116581500	116593999	42	7	2.9754	0.33609	1.80195e-11	1	5.63774e-10	1
chr5	116793500	116803999	41	6	3.32137	0.30108	5.48867e-13	1	2.53589e-11	1
chr5	117228500	117238499	32	10	1.66069	0.602161	0.00101649	1	0.00382667	1
chr5	119493000	119500499	32	10	1.66069	0.602161	0.00101649	1	0.00382667	1
chr5	119675500	119682999	31	10	1.61036	0.620978	0.00191403	1	0.0067376	1
chr5	120210000	120213999	24	6	1.97701	0.505815	0.000159848	1	0.000753409	1
chr5	121635500	121644499	36	9	2.04818	0.488238	7.03096e-06	1	4.79913e-05	1
chr5	121821500	121827999	33	9	1.88211	0.531318	8.10515e-05	1	0.000412991	1
chr5	122094500	122103999	36	12	1.57552	0.63471	0.00169855	1	0.00606365	1
chr5	122415500	122424999	37	9	2.10354	0.47539	2.95555e-06	1	2.23463e-05	1
chr5	122985000	122996499	45	12	1.95876	0.510527	3.66556e-06	1	2.63247e-05	1
chr5	123499500	123507999	25	8	1.59918	0.625321	0.0039101	1	0.0127346	1
chr5	123809000	123821999	42	16	1.40019	0.71419	0.00840617	1	0.0252308	1
chr5	125962500	125977999	63	16	2.084	0.479847	1.2485e-08	1	1.80588e-07	1
chr5	126388000	126397499	37	13	1.50253	0.665546	0.00356666	1	0.0117088	1
chr5	127012000	127016999	24	5	2.30651	0.433556	9.18142e-06	1	6.04478e-05	1
chr5	127561000	127571999	39	8	2.46028	0.406458	2.48204e-08	1	3.31214e-07	1
chr5	127692500	127705999	41	15	1.4531	0.688183	0.00474618	1	0.0151541	1
chr5	128746000	128747499	1	17	0.0615069	16.2583	1	1.18925e-12	1	8.55781e-09
chr5	129737500	129739499	20	5	1.93747	0.516138	0.000459638	1	0.00191993	1
chr5	131019000	131034499	50	19	1.41158	0.708424	0.00459414	1	0.0147094	1
chr5	131221000	131227999	27	5	2.58329	0.387103	3.27296e-07	1	3.20875e-06	1
chr5	132232500	132243999	46	18	1.36934	0.73028	0.00991475	1	0.0292494	1
chr5	132627500	132641499	45	16	1.49787	0.667613	0.0020242	1	0.00707867	1
chr5	133048000	133053999	29	3	4.15172	0.240864	2.10964e-13	1	1.10207e-11	1
chr5	133438500	133446499	33	7	2.35264	0.425054	4.9524e-07	1	4.57771e-06	1
chr5	133554000	133560999	32	7	2.28344	0.437935	1.35275e-06	1	1.08764e-05	1
chr5	133843000	133850999	38	14	1.43926	0.694801	0.00679838	1	0.0208109	1
chr5	135839500	135868499	104	42	1.35172	0.739797	0.000888918	1	0.00342113	1
chr5	136720500	136731999	49	17	1.53767	0.650333	0.000847376	1	0.0032735	1
chr5	137145000	137156999	42	10	2.16393	0.462123	4.39018e-07	1	4.17053e-06	1
chr5	137340500	137350999	42	16	1.40019	0.71419	0.00840617	1	0.0252308	1
chr5	137500500	137509499	36	7	2.56023	0.390591	2.0608e-08	1	2.82602e-07	1
chr5	137916000	137925999	38	11	1.79908	0.55584	9.55922e-05	1	0.000478194	1
chr5	140181000	140188999	28	7	2.00666	0.49834	5.60715e-05	1	0.000298274	1
chr5	140355500	140371999	61	12	2.64007	0.378778	1.26428e-12	1	5.33594e-11	1
chr5	140681000	140683999	24	4	2.76781	0.361296	1.9173e-07	1	1.93981e-06	1
chr5	141802500	141818999	63	20	1.68705	0.592752	1.78743e-05	1	0.000108704	1
chr5	142068500	142077499	37	14	1.40236	0.713085	0.0108758	1	0.0317721	1
chr5	142868000	142875499	38	9	2.15889	0.4632	1.21188e-06	1	1.02086e-05	1
chr5	143014000	143015499	19	4	2.21425	0.45162	6.78956e-05	1	0.000353529	1
chr5	143135500	143144499	39	10	2.01295	0.496782	5.79039e-06	1	4.03365e-05	1
chr5	144148500	144157999	34	5	3.22911	0.309683	4.3688e-11	1	1.24754e-09	1
chr5	145390500	145398499	32	11	1.5223	0.656902	0.00431081	1	0.0138686	1
chr5	145946500	145965499	75	24	1.68283	0.594237	4.59346e-06	1	3.26464e-05	1
chr5	146044500	146051999	36	12	1.57552	0.63471	0.00169855	1	0.00606365	1
chr5	146399000	146409499	42	11	1.9836	0.504134	4.65116e-06	1	3.29103e-05	1
chr5	147081500	147092999	38	14	1.43926	0.694801	0.00679838	1	0.0208109	1
chr5	147885000	147893499	31	9	1.7714	0.564525	0.000361158	1	0.0015442	1
chr5	148185500	148193499	31	6	2.53057	0.395168	1.45257e-07	1	1.57658e-06	1
chr5	148383000	148394999	44	13	1.77931	0.562016	5.12214e-05	1	0.000275426	1
chr5	148634500	148640999	34	9	1.93747	0.516138	3.6842e-05	1	0.000205476	1
chr5	149262000	149267999	32	5	3.04459	0.328451	6.49619e-10	1	1.32426e-08	1
chr5	149298000	149307999	39	12	1.70327	0.587107	0.0002691	1	0.00118491	1
chr5	149660000	149666499	32	7	2.28344	0.437935	1.35275e-06	1	1.08764e-05	1
chr5	151316000	151322499	33	8	2.09124	0.478186	8.25577e-06	1	5.50333e-05	1
chr5	151375000	151388499	52	11	2.4449	0.409015	5.51831e-10	1	1.15184e-08	1
chr5	151403500	151417999	51	15	1.79908	0.55584	1.38137e-05	1	8.59522e-05	1
chr5	151902000	151916999	49	19	1.38391	0.722593	0.00704844	1	0.0215077	1
chr5	151994500	152003999	32	10	1.66069	0.602161	0.00101649	1	0.00382667	1
chr5	152218000	152231999	47	13	1.89793	0.52689	6.03992e-06	1	4.17014e-05	1
chr5	152394500	152408499	40	15	1.4185	0.704968	0.00761242	1	0.0230115	1
chr5	154048000	154056999	40	13	1.62115	0.616847	0.000661184	1	0.00263266	1
chr5	154840500	154848499	34	8	2.15274	0.464524	3.3481e-06	1	2.4928e-05	1
chr5	156759000	156767999	35	12	1.53294	0.652341	0.00299113	1	0.00997414	1
chr5	156920000	156930499	37	6	3.00505	0.332773	1.10537e-10	1	2.83069e-09	1
chr5	159006000	159020499	57	23	1.33778	0.74751	0.00909481	1	0.0270943	1
chr5	159376500	159394499	53	15	1.86827	0.535254	3.42393e-06	1	2.53549e-05	1
chr5	159443000	159450999	36	10	1.86198	0.537062	6.17629e-05	1	0.000324709	1
chr5	159463000	159470499	31	6	2.53057	0.395168	1.45257e-07	1	1.57658e-06	1
chr5	160025000	160033999	39	8	2.46028	0.406458	2.48204e-08	1	3.31214e-07	1
chr5	160062500	160077499	57	11	2.67555	0.373755	2.96839e-12	1	1.10106e-10	1
chr5	160844000	160853499	34	13	1.38391	0.722593	0.015564	1	0.044277	1
chr5	161948500	161959999	35	7	2.49103	0.40144	6.1083e-08	1	7.40924e-07	1
chr5	162966500	162970999	29	6	2.37241	0.421512	1.26426e-06	1	1.04661e-05	1
chr5	164011000	164021499	39	8	2.46028	0.406458	2.48204e-08	1	3.31214e-07	1
chr5	166009000	166015499	31	9	1.7714	0.564525	0.000361158	1	0.0015442	1
chr5	166619500	166634999	64	11	2.99846	0.333504	9.83526e-16	1	9.86404e-14	1
chr5	167501000	167506499	31	6	2.53057	0.395168	1.45257e-07	1	1.57658e-06	1
chr5	167740000	167750499	35	7	2.49103	0.40144	6.1083e-08	1	7.40924e-07	1
chr5	168133000	168140499	30	10	1.56004	0.64101	0.00350392	1	0.0115569	1
chr5	168187500	168196999	34	10	1.76133	0.567751	0.000264113	1	0.00116993	1
chr5	168414000	168422499	38	10	1.96263	0.50952	1.30594e-05	1	8.1967e-05	1
chr5	168853500	168862499	41	14	1.54997	0.645172	0.00145116	1	0.00524618	1
chr5	169201000	169218499	60	19	1.68836	0.592289	2.51083e-05	1	0.000146092	1
chr5	169893500	169903499	40	14	1.51307	0.660908	0.00248241	1	0.00845306	1
chr5	170290000	170304499	41	12	1.78843	0.559149	7.01539e-05	1	0.000363512	1
chr5	170602500	170614999	56	21	1.43423	0.697238	0.00230438	1	0.00796174	1
chr5	171884500	171897499	54	11	2.53716	0.394141	7.19292e-11	1	1.88906e-09	1
chr5	172205500	172214499	40	6	3.24229	0.308424	2.14356e-12	1	8.64149e-11	1
chr5	172638500	172660499	77	31	1.34931	0.741121	0.00312344	1	0.0103925	1
chr5	173352000	173365999	52	16	1.72581	0.579437	3.71882e-05	1	0.000206089	1
chr5	174406500	174419499	44	16	1.46531	0.682449	0.00331952	1	0.0109991	1
chr5	174687500	174692499	27	5	2.58329	0.387103	3.27296e-07	1	3.20875e-06	1
chr5	174902000	174908499	29	9	1.66069	0.602161	0.00143473	1	0.00521893	1
chr5	175736000	175741999	30	8	1.90671	0.524462	0.000104544	1	0.000512902	1
chr5	177125000	177131499	28	9	1.60533	0.622925	0.00273419	1	0.00923287	1
chr5	177229500	177236999	38	9	2.15889	0.4632	1.21188e-06	1	1.02086e-05	1
chr5	177957000	177971999	61	24	1.37283	0.72842	0.00446603	1	0.0143168	1
chr5	179569500	179580999	38	12	1.66069	0.602161	0.000509233	1	0.00208148	1
chr5	179709000	179720499	48	16	1.59556	0.626738	0.000408369	1	0.00171423	1
chr5	179755000	179761999	34	11	1.61456	0.619365	0.00134145	1	0.00493764	1
chr5	180215000	180220499	28	8	1.7837	0.560632	0.000489714	1	0.0020215	1
chr5	180860500	180870499	37	8	2.33726	0.427851	1.9044e-07	1	1.94798e-06	1
chr6	550500	564999	49	11	2.30651	0.433556	1.02201e-08	1	1.49403e-07	1
chr6	1213000	1224499	37	11	1.75295	0.570468	0.000191993	1	0.000881814	1
chr6	2271000	2293999	80	34	1.2811	0.780578	0.00957063	1	0.0284118	1
chr6	2301500	2310999	45	13	1.81885	0.549799	2.56318e-05	1	0.000147853	1
chr6	2424500	2427999	23	6	1.89793	0.52689	0.000378453	1	0.00159517	1
chr6	2766500	2781999	49	17	1.53767	0.650333	0.000847376	1	0.0032735	1
chr6	3911000	3922999	43	8	2.7063	0.369508	3.17608e-10	1	7.08685e-09	1
chr6	5365000	5371499	32	7	2.28344	0.437935	1.35275e-06	1	1.08764e-05	1
chr6	6528000	6541499	44	13	1.77931	0.562016	5.12214e-05	1	0.000275426	1
chr6	6635500	6643999	40	7	2.83701	0.352484	2.07365e-10	1	4.86454e-09	1
chr6	6677000	6683499	33	7	2.35264	0.425054	4.9524e-07	1	4.57771e-06	1
chr6	7522000	7533999	36	14	1.36545	0.732357	0.0170023	1	0.0479094	1
chr6	8021500	8027499	29	6	2.37241	0.421512	1.26426e-06	1	1.04661e-05	1
chr6	10707000	10711999	27	8	1.72219	0.580655	0.00101134	1	0.00383991	1
chr6	11597500	11602999	29	5	2.76781	0.361296	2.98632e-08	1	3.86155e-07	1
chr6	13358500	13368999	38	9	2.15889	0.4632	1.21188e-06	1	1.02086e-05	1
chr6	13799500	13807999	35	11	1.66069	0.602161	0.000719594	1	0.00282884	1
chr6	14589500	14595999	29	9	1.66069	0.602161	0.00143473	1	0.00521893	1
chr6	17558500	17575499	64	20	1.71341	0.583633	9.76564e-06	1	6.27303e-05	1
chr6	17777000	17787999	39	3	5.53562	0.180648	1.42642e-21	1	4.71931e-19	1
chr6	17967500	17977499	43	14	1.62378	0.615846	0.000464943	1	0.00193423	1
chr6	19963500	19980499	54	14	2.02973	0.492677	2.14642e-07	1	2.15121e-06	1
chr6	20726000	20733499	29	10	1.50972	0.662377	0.00623225	1	0.0192271	1
chr6	20952500	20960499	35	12	1.53294	0.652341	0.00299113	1	0.00997414	1
chr6	21114500	21126499	42	10	2.16393	0.462123	4.39018e-07	1	4.17053e-06	1
chr6	21184000	21194499	37	10	1.91231	0.522929	2.87523e-05	1	0.000163526	1
chr6	21613500	21619499	29	8	1.84521	0.541944	0.000229768	1	0.00103743	1
chr6	24158500	24178499	51	20	1.37073	0.729541	0.00758914	1	0.0230016	1
chr6	24283500	24294999	42	14	1.58688	0.630168	0.000830177	1	0.00321829	1
chr6	24348000	24356999	48	18	1.42761	0.700472	0.00417158	1	0.0134764	1
chr6	24527000	24536999	37	11	1.75295	0.570468	0.000191993	1	0.000881814	1
chr6	24557500	24564999	31	8	1.96822	0.508073	4.61663e-05	1	0.000252537	1
chr6	24691000	24700999	42	13	1.70023	0.588157	0.000192126	1	0.000877244	1
chr6	26147000	26160499	44	12	1.91618	0.521872	7.91482e-06	1	5.33662e-05	1
chr6	26206000	26210999	28	4	3.21066	0.311462	8.74029e-10	1	1.68507e-08	1
chr6	26483500	26486499	21	2	4.05946	0.246338	5.33027e-11	1	1.43389e-09	1
chr6	28400000	28408499	30	7	2.14505	0.466189	9.25351e-06	1	6.04386e-05	1
chr6	28993500	29000499	34	13	1.38391	0.722593	0.015564	1	0.044277	1
chr6	29708500	29717999	42	16	1.40019	0.71419	0.00840617	1	0.0252308	1
chr6	30501000	30511499	37	14	1.40236	0.713085	0.0108758	1	0.0317721	1
chr6	30577000	30586499	40	13	1.62115	0.616847	0.000661184	1	0.00263266	1
chr6	31282500	31288999	31	6	2.53057	0.395168	1.45257e-07	1	1.57658e-06	1
chr6	31728000	31742999	61	13	2.45149	0.407915	3.10078e-11	1	9.24899e-10	1
chr6	31887500	31888499	46	8	2.89083	0.345922	9.58017e-12	1	3.24037e-10	1
chr6	32393500	32399999	25	4	2.87852	0.3474	5.25709e-08	1	6.48886e-07	1
chr6	33787000	33794999	30	8	1.90671	0.524462	0.000104544	1	0.000512902	1
chr6	33903500	33906999	23	6	1.89793	0.52689	0.000378453	1	0.00159517	1
chr6	34625000	34635499	43	13	1.73977	0.57479	0.000100256	1	0.000495069	1
chr6	35654000	35657999	4	20	0.131801	7.58722	1	2.28589e-05	1	0.017783
chr6	36836500	36865499	103	37	1.51501	0.660061	1.55281e-05	1	9.61205e-05	1
chr6	37171000	37189499	73	17	2.27576	0.439414	2.68057e-11	1	8.19952e-10	1
chr6	37596500	37606999	40	14	1.51307	0.660908	0.00248241	1	0.00845306	1
chr6	37803500	37813499	37	9	2.10354	0.47539	2.95555e-06	1	2.23463e-05	1
chr6	38129000	38143499	50	16	1.66069	0.602161	0.000127809	1	0.000622692	1
chr6	38901000	38907499	29	9	1.66069	0.602161	0.00143473	1	0.00521893	1
chr6	39195000	39206999	46	14	1.7345	0.576537	7.21563e-05	1	0.000371348	1
chr6	40657500	40670499	54	15	1.90287	0.525522	1.66015e-06	1	1.31859e-05	1
chr6	40890500	40894999	23	5	2.21425	0.45162	2.59252e-05	1	0.000149008	1
chr6	41034500	41045999	46	9	2.60174	0.384358	4.21117e-10	1	9.00553e-09	1
chr6	41268500	41276499	35	8	2.21425	0.45162	1.32167e-06	1	1.07648e-05	1
chr6	42173000	42180499	32	5	3.04459	0.328451	6.49619e-10	1	1.32426e-08	1
chr6	42233000	42238499	29	9	1.66069	0.602161	0.00143473	1	0.00521893	1
chr6	42402500	42419999	55	14	2.06663	0.483879	9.56345e-08	1	1.08547e-06	1
chr6	42450500	42454999	31	4	3.5428	0.282263	1.07796e-11	1	3.55012e-10	1
chr6	42696000	42702499	26	5	2.49103	0.40144	1.03035e-06	1	8.90083e-06	1
chr6	43368500	43376999	40	10	2.06328	0.484666	2.50757e-06	1	1.93714e-05	1
chr6	43573000	43579499	31	5	2.95233	0.338715	2.39873e-09	1	4.1719e-08	1
chr6	44122500	44135999	40	15	1.4185	0.704968	0.00761242	1	0.0230115	1
chr6	44549000	44553499	25	2	4.79754	0.20844	2.46473e-14	1	1.80063e-12	1
chr6	45405500	45431999	96	26	1.98872	0.502835	1.15831e-10	1	2.92976e-09	1
chr6	46579500	46592499	42	8	2.6448	0.378101	9.77093e-10	1	1.85641e-08	1
chr6	46933000	46940999	39	14	1.47617	0.677431	0.00415423	1	0.0134809	1
chr6	48332500	48340499	31	8	1.96822	0.508073	4.61663e-05	1	0.000252537	1
chr6	48892000	48899499	31	11	1.47617	0.677431	0.00742305	1	0.0225433	1
chr6	49774000	49786499	40	9	2.26961	0.440605	1.89519e-07	1	1.96156e-06	1
chr6	50371000	50386999	44	17	1.38391	0.722593	0.00917477	1	0.0272929	1
chr6	52241500	52251499	37	13	1.50253	0.665546	0.00356666	1	0.0117088	1
chr6	52717000	52726499	33	12	1.44778	0.690714	0.00860346	1	0.0257344	1
chr6	53049500	53072499	87	36	1.31658	0.759543	0.00385352	1	0.0125859	1
chr6	55681000	55693499	38	8	2.39877	0.41688	6.95992e-08	1	8.22053e-07	1
chr6	56271500	56283999	49	12	2.12909	0.469685	1.37804e-07	1	1.52266e-06	1
chr6	61400000	61407499	34	9	1.93747	0.516138	3.6842e-05	1	0.000205476	1
chr6	63346500	63349999	25	1	7.19631	0.13896	2.07732e-21	1	6.16429e-19	1
chr6	63695000	63707499	40	11	1.89134	0.528726	2.20729e-05	1	0.000130461	1
chr6	65676000	65682999	34	11	1.61456	0.619365	0.00134145	1	0.00493764	1
chr6	66605500	66614499	34	10	1.76133	0.567751	0.000264113	1	0.00116993	1
chr6	70844500	70857999	50	8	3.13685	0.318791	6.7505e-14	1	4.32754e-12	1
chr6	71718000	71736999	54	19	1.5223	0.656902	0.0006973	1	0.00276461	1
chr6	75131500	75136999	31	4	3.5428	0.282263	1.07796e-11	1	3.55012e-10	1
chr6	75602500	75614499	40	9	2.26961	0.440605	1.89519e-07	1	1.96156e-06	1
chr6	75989000	75996999	35	13	1.42345	0.702521	0.00975806	1	0.0288878	1
chr6	79437500	79449999	47	17	1.47617	0.677431	0.00232547	1	0.00801249	1
chr6	79753000	79763999	37	7	2.62942	0.380312	6.77502e-09	1	1.05526e-07	1
chr6	79902500	79911999	36	10	1.86198	0.537062	6.17629e-05	1	0.000324709	1
chr6	80508000	80513999	28	3	4.01333	0.24917	1.17594e-12	1	5.09761e-11	1
chr6	81684000	81694499	36	13	1.46299	0.683534	0.0059706	1	0.0185291	1
chr6	82741000	82748999	33	9	1.88211	0.531318	8.10515e-05	1	0.000412991	1
chr6	83008000	83013499	30	3	4.29011	0.233094	3.66433e-14	1	2.47012e-12	1
chr6	85440000	85449499	31	8	1.96822	0.508073	4.61663e-05	1	0.000252537	1
chr6	87507500	87520999	43	13	1.73977	0.57479	0.000100256	1	0.000495069	1
chr6	87709500	87719499	39	10	2.01295	0.496782	5.79039e-06	1	4.03365e-05	1
chr6	88302500	88314999	45	17	1.41466	0.706884	0.00591915	1	0.018451	1
chr6	89045500	89058999	42	15	1.4877	0.672179	0.00289696	1	0.00972205	1
chr6	89205500	89208499	23	5	2.21425	0.45162	2.59252e-05	1	0.000149008	1
chr6	89214000	89220499	34	3	4.84367	0.206455	2.46063e-17	1	3.63214e-15	1
chr6	90757500	90770499	41	14	1.54997	0.645172	0.00145116	1	0.00524618	1
chr6	90889500	90899499	41	7	2.9062	0.344092	6.18355e-11	1	1.64195e-09	1
chr6	92866000	92876999	32	9	1.82676	0.547419	0.000173504	1	0.000808899	1
chr6	94314000	94323499	39	11	1.84521	0.541944	4.6474e-05	1	0.000252112	1
chr6	96605000	96613999	33	9	1.88211	0.531318	8.10515e-05	1	0.000412991	1
chr6	97724500	97732999	28	5	2.67555	0.373755	1.00501e-07	1	1.12957e-06	1
chr6	99092500	99104499	44	15	1.55689	0.642305	0.00101398	1	0.00383729	1
chr6	99253500	99264499	42	7	2.9754	0.33609	1.80195e-11	1	5.63774e-10	1
chr6	99270500	99277999	33	5	3.13685	0.318791	1.70872e-10	1	4.14702e-09	1
chr6	99493000	99501999	35	11	1.66069	0.602161	0.000719594	1	0.00282884	1
chr6	99734500	99745499	42	13	1.70023	0.588157	0.000192126	1	0.000877244	1
chr6	99834000	99843999	44	15	1.55689	0.642305	0.00101398	1	0.00383729	1
chr6	99863500	99869999	31	7	2.21425	0.45162	3.59057e-06	1	2.60395e-05	1
chr6	100118500	100126499	31	5	2.95233	0.338715	2.39873e-09	1	4.1719e-08	1
chr6	100305500	100319499	51	10	2.61684	0.38214	6.05629e-11	1	1.62464e-09	1
chr6	103887500	103891499	23	6	1.89793	0.52689	0.000378453	1	0.00159517	1
chr6	105098000	105105499	32	8	2.02973	0.492677	1.98017e-05	1	0.00011867	1
chr6	106045000	106056999	46	11	2.16812	0.461229	1.59205e-07	1	1.70165e-06	1
chr6	106097000	106116999	68	20	1.81885	0.549799	7.5385e-07	1	6.65404e-06	1
chr6	107662500	107674999	49	17	1.53767	0.650333	0.000847376	1	0.0032735	1
chr6	108628500	108635499	34	8	2.15274	0.464524	3.3481e-06	1	2.4928e-05	1
chr6	108952000	108964999	46	16	1.53044	0.653408	0.00121029	1	0.00449164	1
chr6	109067000	109077499	40	11	1.89134	0.528726	2.20729e-05	1	0.000130461	1
chr6	109360500	109368999	32	5	3.04459	0.328451	6.49619e-10	1	1.32426e-08	1
chr6	109824500	109832499	36	10	1.86198	0.537062	6.17629e-05	1	0.000324709	1
chr6	109943000	109951499	38	8	2.39877	0.41688	6.95992e-08	1	8.22053e-07	1
chr6	110389500	110399999	38	11	1.79908	0.55584	9.55922e-05	1	0.000478194	1
chr6	110951000	110962999	38	13	1.54207	0.648481	0.00208101	1	0.00723165	1
chr6	111578500	111585499	29	4	3.32137	0.30108	2.08459e-10	1	4.7773e-09	1
chr6	111743500	111754999	43	11	2.02973	0.492677	2.06541e-06	1	1.6239e-05	1
chr6	111859500	111866999	31	10	1.61036	0.620978	0.00191403	1	0.0067376	1
chr6	114272000	114277499	31	5	2.95233	0.338715	2.39873e-09	1	4.1719e-08	1
chr6	116540000	116550499	40	13	1.62115	0.616847	0.000661184	1	0.00263266	1
chr6	117036000	117051499	50	16	1.66069	0.602161	0.000127809	1	0.000622692	1
chr6	117312500	117320499	37	8	2.33726	0.427851	1.9044e-07	1	1.94798e-06	1
chr6	119326500	119330499	25	7	1.79908	0.55584	0.000655946	1	0.00262598	1
chr6	119393000	119398999	29	8	1.84521	0.541944	0.000229768	1	0.00103743	1
chr6	120764000	120770499	32	6	2.60965	0.383193	4.70662e-08	1	5.9263e-07	1
chr6	124783500	124793499	37	9	2.10354	0.47539	2.95555e-06	1	2.23463e-05	1
chr6	125637500	125637999	14	0	8.30343	0.120432	1.00713e-09	1	1.90094e-08	1
chr6	126971500	126984999	41	10	2.1136	0.473126	1.06115e-06	1	9.07429e-06	1
chr6	128333000	128340499	31	6	2.53057	0.395168	1.45257e-07	1	1.57658e-06	1
chr6	130722500	130730999	36	11	1.70682	0.585886	0.000376341	1	0.00159467	1
chr6	131060500	131070499	38	13	1.54207	0.648481	0.00208101	1	0.00723165	1
chr6	131628000	131637499	37	11	1.75295	0.570468	0.000191993	1	0.000881814	1
chr6	133333000	133342499	36	8	2.27576	0.439414	5.08181e-07	1	4.62895e-06	1
chr6	134717500	134724999	29	8	1.84521	0.541944	0.000229768	1	0.00103743	1
chr6	134991000	135004999	37	13	1.50253	0.665546	0.00356666	1	0.0117088	1
chr6	135521500	135530999	36	10	1.86198	0.537062	6.17629e-05	1	0.000324709	1
chr6	136290000	136304999	66	25	1.42649	0.701023	0.00140577	1	0.00514479	1
chr6	136543500	136553999	40	12	1.74585	0.572787	0.000138962	1	0.000660154	1
chr6	136937500	136944499	29	9	1.66069	0.602161	0.00143473	1	0.00521893	1
chr6	137748500	137753999	26	8	1.66069	0.602161	0.00202197	1	0.00708551	1
chr6	137909500	137920499	40	9	2.26961	0.440605	1.89519e-07	1	1.96156e-06	1
chr6	138160000	138166999	33	8	2.09124	0.478186	8.25577e-06	1	5.50333e-05	1
chr6	140067000	140073999	32	7	2.28344	0.437935	1.35275e-06	1	1.08764e-05	1
chr6	142289000	142302499	48	15	1.69528	0.589872	9.76555e-05	1	0.000484557	1
chr6	142651000	142665499	60	10	3.06975	0.325759	1.83798e-15	1	1.70111e-13	1
chr6	143133000	143145999	45	16	1.49787	0.667613	0.0020242	1	0.00707867	1
chr6	143449500	143463499	57	14	2.14044	0.467194	1.8041e-08	1	2.499e-07	1
chr6	143543500	143548999	30	5	2.86007	0.349642	8.59546e-09	1	1.3056e-07	1
chr6	143954500	143965999	42	13	1.70023	0.588157	0.000192126	1	0.000877244	1
chr6	144962000	144967499	32	7	2.28344	0.437935	1.35275e-06	1	1.08764e-05	1
chr6	145798500	145806499	36	11	1.70682	0.585886	0.000376341	1	0.00159467	1
chr6	148684000	148697499	47	16	1.563	0.639796	0.000709767	1	0.00280785	1
chr6	148842000	148853999	38	13	1.54207	0.648481	0.00208101	1	0.00723165	1
chr6	148947500	148958499	45	11	2.12199	0.471256	3.81967e-07	1	3.71061e-06	1
chr6	149106500	149120999	50	20	1.34437	0.743845	0.0113002	1	0.0328915	1
chr6	149545000	149549999	26	5	2.49103	0.40144	1.03035e-06	1	8.90083e-06	1
chr6	150208000	150218499	44	6	3.55861	0.281008	8.03667e-15	1	6.26904e-13	1
chr6	150578500	150588499	34	8	2.15274	0.464524	3.3481e-06	1	2.4928e-05	1
chr6	151369000	151378999	37	14	1.40236	0.713085	0.0108758	1	0.0317721	1
chr6	154835000	154846999	35	13	1.42345	0.702521	0.00975806	1	0.0288878	1
chr6	154974000	154985999	45	11	2.12199	0.471256	3.81967e-07	1	3.71061e-06	1
chr6	155137500	155152999	54	13	2.17471	0.459832	2.10058e-08	1	2.85338e-07	1
chr6	155960500	155969499	40	14	1.51307	0.660908	0.00248241	1	0.00845306	1
chr6	156098500	156108499	32	12	1.4052	0.711644	0.0140392	1	0.0402536	1
chr6	157333000	157339999	33	5	3.13685	0.318791	1.70872e-10	1	4.14702e-09	1
chr6	158509000	158521499	44	12	1.91618	0.521872	7.91482e-06	1	5.33662e-05	1
chr6	159835500	159844999	40	7	2.83701	0.352484	2.07365e-10	1	4.86454e-09	1
chr6	167153000	167161499	35	7	2.49103	0.40144	6.1083e-08	1	7.40924e-07	1
chr6	168174500	168181499	36	4	4.09636	0.244119	3.91872e-15	1	3.33717e-13	1
chr6	168331000	168339999	31	8	1.96822	0.508073	4.61663e-05	1	0.000252537	1
chr6	170474000	170490499	51	21	1.30842	0.764281	0.017297	1	0.048616	1
chr7	101000	111499	40	13	1.62115	0.616847	0.000661184	1	0.00263266	1
chr7	853000	861499	37	8	2.33726	0.427851	1.9044e-07	1	1.94798e-06	1
chr7	1442500	1448999	27	7	1.93747	0.516138	0.000131603	1	0.000632292	1
chr7	2124000	2131499	36	8	2.27576	0.439414	5.08181e-07	1	4.62895e-06	1
chr7	2799000	2805499	28	5	2.67555	0.373755	1.00501e-07	1	1.12957e-06	1
chr7	3450000	3457999	34	9	1.93747	0.516138	3.6842e-05	1	0.000205476	1
chr7	3946500	3957999	36	13	1.46299	0.683534	0.0059706	1	0.0185291	1
chr7	4532000	4546499	44	14	1.66069	0.602161	0.00025501	1	0.00113767	1
chr7	5703000	5712499	33	10	1.71101	0.58445	0.000525164	1	0.00212996	1
chr7	6266500	6277499	41	15	1.4531	0.688183	0.00474618	1	0.0151541	1
chr7	6409500	6420499	42	14	1.58688	0.630168	0.000830177	1	0.00321829	1
chr7	7474000	7482499	30	10	1.56004	0.64101	0.00350392	1	0.0115569	1
chr7	7942500	7950499	37	8	2.33726	0.427851	1.9044e-07	1	1.94798e-06	1
chr7	8156000	8162499	27	7	1.93747	0.516138	0.000131603	1	0.000632292	1
chr7	8207500	8212999	28	10	1.45939	0.685217	0.0107631	1	0.0315807	1
chr7	8340500	8348499	32	7	2.28344	0.437935	1.35275e-06	1	1.08764e-05	1
chr7	8538500	8552499	54	19	1.5223	0.656902	0.0006973	1	0.00276461	1
chr7	9946000	9954499	32	1	9.13378	0.109484	5.96963e-30	1	1.14553e-26	1
chr7	11444000	11453499	39	10	2.01295	0.496782	5.79039e-06	1	4.03365e-05	1
chr7	11478500	11484499	28	5	2.67555	0.373755	1.00501e-07	1	1.12957e-06	1
chr7	14677000	14686999	36	10	1.86198	0.537062	6.17629e-05	1	0.000324709	1
chr7	15590500	15596999	28	8	1.7837	0.560632	0.000489714	1	0.0020215	1
chr7	15792000	15802999	38	9	2.15889	0.4632	1.21188e-06	1	1.02086e-05	1
chr7	16363500	16366999	28	7	2.00666	0.49834	5.60715e-05	1	0.000298274	1
chr7	16370000	16377499	36	9	2.04818	0.488238	7.03096e-06	1	4.79913e-05	1
chr7	16890000	16901499	37	10	1.91231	0.522929	2.87523e-05	1	0.000163526	1
chr7	17057500	17068999	46	7	3.25218	0.307486	1.04232e-13	1	6.17327e-12	1
chr7	17760500	17763499	26	6	2.13517	0.468347	2.55602e-05	1	0.000148212	1
chr7	18153000	18163499	33	11	1.56843	0.637582	0.00243675	1	0.0083539	1
chr7	18559500	18566999	31	4	3.5428	0.282263	1.07796e-11	1	3.55012e-10	1
chr7	18637000	18650999	43	12	1.8736	0.533733	1.67357e-05	1	0.000102146	1
chr7	18775500	18792499	57	23	1.33778	0.74751	0.00909481	1	0.0270943	1
chr7	20844000	20855499	41	11	1.93747	0.516138	1.02465e-05	1	6.53091e-05	1
chr7	21861000	21870999	40	6	3.24229	0.308424	2.14356e-12	1	8.64149e-11	1
chr7	23233000	23243499	42	16	1.40019	0.71419	0.00840617	1	0.0252308	1
chr7	23914000	23926499	46	9	2.60174	0.384358	4.21117e-10	1	9.00553e-09	1
chr7	24969000	24980499	42	15	1.4877	0.672179	0.00289696	1	0.00972205	1
chr7	25568500	25585999	60	16	1.98631	0.503446	1.34179e-07	1	1.48947e-06	1
chr7	26301500	26314499	46	18	1.36934	0.73028	0.00991475	1	0.0292494	1
chr7	26508500	26515499	34	10	1.76133	0.567751	0.000264113	1	0.00116993	1
chr7	27831500	27848999	71	30	1.28569	0.777791	0.0118654	1	0.034488	1
chr7	28822500	28835999	47	11	2.21425	0.45162	6.50221e-08	1	7.78211e-07	1
chr7	28938000	28951999	43	17	1.35315	0.739015	0.0139453	1	0.040096	1
chr7	28976000	28994999	73	29	1.36545	0.732357	0.00280527	1	0.00944298	1
chr7	29244000	29260499	57	15	2.00666	0.49834	1.70798e-07	1	1.81546e-06	1
chr7	29927500	29933499	33	9	1.88211	0.531318	8.10515e-05	1	0.000412991	1
chr7	31647000	31653499	29	10	1.50972	0.662377	0.00623225	1	0.0192271	1
chr7	32149000	32159999	54	5	5.07432	0.197071	4.15816e-25	1	2.54656e-22	1
chr7	32174500	32185499	36	5	3.41363	0.292943	2.63085e-12	1	9.95089e-11	1
chr7	32886000	32892499	28	9	1.60533	0.622925	0.00273419	1	0.00923287	1
chr7	33634000	33641499	34	13	1.38391	0.722593	0.015564	1	0.044277	1
chr7	34893500	34903499	44	5	4.15172	0.240864	1.27356e-17	1	1.99229e-15	1
chr7	36482500	36490999	30	10	1.56004	0.64101	0.00350392	1	0.0115569	1
chr7	37492000	37506499	44	12	1.91618	0.521872	7.91482e-06	1	5.33662e-05	1
chr7	38330500	38345499	43	14	1.62378	0.615846	0.000464943	1	0.00193423	1
chr7	38867000	38872999	31	8	1.96822	0.508073	4.61663e-05	1	0.000252537	1
chr7	39583500	39596499	43	11	2.02973	0.492677	2.06541e-06	1	1.6239e-05	1
chr7	41630000	41642999	43	14	1.62378	0.615846	0.000464943	1	0.00193423	1
chr7	42333500	42343999	47	17	1.47617	0.677431	0.00232547	1	0.00801249	1
chr7	43683500	43698499	51	17	1.59918	0.625321	0.000286988	1	0.00125542	1
chr7	43938500	43945499	36	12	1.57552	0.63471	0.00169855	1	0.00606365	1
chr7	45884000	45894499	33	6	2.68873	0.371923	1.48152e-08	1	2.09348e-07	1
chr7	46566000	46572999	33	5	3.13685	0.318791	1.70872e-10	1	4.14702e-09	1
chr7	47342500	47355499	45	13	1.81885	0.549799	2.56318e-05	1	0.000147853	1
chr7	47732000	47738999	36	10	1.86198	0.537062	6.17629e-05	1	0.000324709	1
chr7	47962500	47971999	38	11	1.79908	0.55584	9.55922e-05	1	0.000478194	1
chr7	48452000	48458999	32	8	2.02973	0.492677	1.98017e-05	1	0.00011867	1
chr7	50817000	50826999	44	14	1.66069	0.602161	0.00025501	1	0.00113767	1
chr7	55489000	55495499	29	6	2.37241	0.421512	1.26426e-06	1	1.04661e-05	1
chr7	56040500	56059499	62	16	2.05144	0.487463	2.79773e-08	1	3.65381e-07	1
chr7	57283000	57294499	47	12	2.04392	0.489255	7.39459e-07	1	6.55717e-06	1
chr7	57949000	57961999	39	15	1.38391	0.722593	0.0119492	1	0.0346372	1
chr7	64562500	64574999	42	14	1.58688	0.630168	0.000830177	1	0.00321829	1
chr7	64589500	64601999	36	14	1.36545	0.732357	0.0170023	1	0.0479094	1
chr7	64875000	64880499	31	5	2.95233	0.338715	2.39873e-09	1	4.1719e-08	1
chr7	66013500	66020999	30	11	1.43004	0.699283	0.0124349	1	0.0359616	1
chr7	66555000	66563999	37	11	1.75295	0.570468	0.000191993	1	0.000881814	1
chr7	66675500	66688499	42	11	1.9836	0.504134	4.65116e-06	1	3.29103e-05	1
chr7	66811000	66824499	48	14	1.8083	0.553005	1.88591e-05	1	0.000114282	1
chr7	69726500	69733499	27	9	1.54997	0.645172	0.00505203	1	0.0160275	1
chr7	70122000	70130499	30	7	2.14505	0.466189	9.25351e-06	1	6.04386e-05	1
chr7	70505500	70514499	31	7	2.21425	0.45162	3.59057e-06	1	2.60395e-05	1
chr7	73367000	73373999	27	6	2.21425	0.45162	9.69902e-06	1	6.25676e-05	1
chr7	77249500	77258999	35	8	2.21425	0.45162	1.32167e-06	1	1.07648e-05	1
chr7	77308500	77321999	48	17	1.50692	0.663605	0.00141685	1	0.00517742	1
chr7	77585500	77594999	34	8	2.15274	0.464524	3.3481e-06	1	2.4928e-05	1
chr7	77679000	77694999	53	17	1.66069	0.602161	9.05262e-05	1	0.000456421	1
chr7	78761500	78771499	38	12	1.66069	0.602161	0.000509233	1	0.00208148	1
chr7	79134500	79146499	44	17	1.38391	0.722593	0.00917477	1	0.0272929	1
chr7	79522500	79531499	34	7	2.42183	0.41291	1.76311e-07	1	1.85691e-06	1
chr7	80832000	80844499	39	11	1.84521	0.541944	4.6474e-05	1	0.000252112	1
chr7	81685000	81688999	24	7	1.72988	0.578074	0.00139017	1	0.00509287	1
chr7	84979000	84985499	30	8	1.90671	0.524462	0.000104544	1	0.000512902	1
chr7	85163000	85171999	32	5	3.04459	0.328451	6.49619e-10	1	1.32426e-08	1
chr7	89633000	89647999	59	22	1.44408	0.692485	0.00163308	1	0.00585971	1
chr7	90617500	90622499	31	7	2.21425	0.45162	3.59057e-06	1	2.60395e-05	1
chr7	90719000	90730999	47	19	1.32855	0.752701	0.0157278	1	0.0445317	1
chr7	90746500	90756499	48	19	1.35623	0.737339	0.0106237	1	0.0312353	1
chr7	91433000	91444499	52	16	1.72581	0.579437	3.71882e-05	1	0.000206089	1
chr7	91673000	91677499	27	8	1.72219	0.580655	0.00101134	1	0.00383991	1
chr7	91763500	91769999	31	11	1.47617	0.677431	0.00742305	1	0.0225433	1
chr7	91925000	91930499	26	5	2.49103	0.40144	1.03035e-06	1	8.90083e-06	1
chr7	92087000	92102499	60	24	1.35069	0.740361	0.00658024	1	0.0202011	1
chr7	92224000	92229999	29	10	1.50972	0.662377	0.00623225	1	0.0192271	1
chr7	92352500	92357499	29	4	3.32137	0.30108	2.08459e-10	1	4.7773e-09	1
chr7	92429500	92439499	41	16	1.36762	0.731195	0.0129734	1	0.0374324	1
chr7	92550000	92558499	44	15	1.55689	0.642305	0.00101398	1	0.00383729	1
chr7	92611000	92621499	43	17	1.35315	0.739015	0.0139453	1	0.040096	1
chr7	92734500	92745999	47	14	1.7714	0.564525	3.72506e-05	1	0.000205761	1
chr7	92954000	92962499	36	12	1.57552	0.63471	0.00169855	1	0.00606365	1
chr7	92999500	93009499	51	15	1.79908	0.55584	1.38137e-05	1	8.59522e-05	1
chr7	93083500	93094499	46	13	1.85839	0.538101	1.25676e-05	1	7.95398e-05	1
chr7	93450000	93456999	37	13	1.50253	0.665546	0.00356666	1	0.0117088	1
chr7	93494500	93521999	101	45	1.22746	0.814688	0.0148239	1	0.0423726	1
chr7	93601500	93615499	56	19	1.57765	0.633853	0.000245582	1	0.00110089	1
chr7	93928500	93938499	42	11	1.9836	0.504134	4.65116e-06	1	3.29103e-05	1
chr7	94004500	94029999	94	41	1.25211	0.798655	0.0108749	1	0.0318501	1
chr7	94086500	94095499	51	20	1.37073	0.729541	0.00758914	1	0.0230016	1
chr7	94257500	94269999	60	25	1.29874	0.769976	0.0141818	1	0.0405855	1
chr7	94715000	94719999	29	5	2.76781	0.361296	2.98632e-08	1	3.86155e-07	1
chr7	95044000	95053999	39	14	1.47617	0.677431	0.00415423	1	0.0134809	1
chr7	95101500	95109999	35	11	1.66069	0.602161	0.000719594	1	0.00282884	1
chr7	95176000	95188999	44	17	1.38391	0.722593	0.00917477	1	0.0272929	1
chr7	95440000	95474999	125	57	1.20257	0.831555	0.015315	1	0.0436937	1
chr7	95779500	95787499	41	8	2.58329	0.387103	2.93932e-09	1	4.99737e-08	1
chr7	95837500	95844999	34	13	1.38391	0.722593	0.015564	1	0.044277	1
chr7	95967500	95981499	74	20	1.97701	0.505815	1.07173e-08	1	1.55801e-07	1
chr7	96068000	96081999	65	22	1.58848	0.629531	8.58603e-05	1	0.000433808	1
chr7	96322000	96330499	47	9	2.6571	0.37635	1.41218e-10	1	3.55007e-09	1
chr7	96632000	96658499	114	42	1.48046	0.675467	1.74478e-05	1	0.000106222	1
chr7	96691500	96706499	55	22	1.3478	0.741948	0.00861342	1	0.0257081	1
chr7	96733000	96736999	24	3	3.45976	0.289037	8.03592e-10	1	1.56818e-08	1
chr7	96751000	96760999	40	15	1.4185	0.704968	0.00761242	1	0.0230115	1
chr7	97011500	97022499	51	21	1.30842	0.764281	0.017297	1	0.048616	1
chr7	97041500	97050499	36	9	2.04818	0.488238	7.03096e-06	1	4.79913e-05	1
chr7	97093000	97121499	102	37	1.50045	0.666469	2.45377e-05	1	0.000143061	1
chr7	97845000	97856499	64	22	1.56442	0.639217	0.000145472	1	0.000687114	1
chr7	97966000	97974999	39	11	1.84521	0.541944	4.6474e-05	1	0.000252112	1
chr7	98323000	98334999	66	27	1.3246	0.754948	0.00762533	1	0.0229926	1
chr7	98362500	98389999	125	36	1.8851	0.530475	1.39466e-11	1	4.40173e-10	1
chr7	98618500	98629499	80	10	4.07623	0.245325	2.00686e-27	1	2.40689e-24	1
chr7	99011000	99019999	50	20	1.34437	0.743845	0.0113002	1	0.0328915	1
chr7	99025500	99031999	34	12	1.49036	0.670979	0.0051377	1	0.0162313	1
chr7	99055000	99068499	52	18	1.54415	0.647607	0.000594196	1	0.00238907	1
chr7	99192000	99194999	23	6	1.89793	0.52689	0.000378453	1	0.00159517	1
chr7	99209000	99219499	50	13	2.01655	0.495897	5.9662e-07	1	5.36827e-06	1
chr7	99263500	99280999	88	30	1.58926	0.629224	9.08752e-06	1	6.00081e-05	1
chr7	99599500	99605999	44	13	1.77931	0.562016	5.12214e-05	1	0.000275426	1
chr7	99631000	99651999	86	35	1.33778	0.74751	0.00263401	1	0.00892073	1
chr7	99737500	99743999	28	8	1.7837	0.560632	0.000489714	1	0.0020215	1
chr7	99815500	99822499	37	9	2.10354	0.47539	2.95555e-06	1	2.23463e-05	1
chr7	100028000	100039499	61	23	1.43004	0.699283	0.00180106	1	0.0063821	1
chr7	100043500	100070499	113	41	1.50253	0.665546	1.00525e-05	1	6.45295e-05	1
chr7	100383500	100385999	20	3	2.9062	0.344092	2.96482e-07	1	2.92859e-06	1
chr7	100933000	100939499	35	10	1.81166	0.55198	0.000129375	1	0.000626817	1
chr7	101102000	101109499	34	12	1.49036	0.670979	0.0051377	1	0.0162313	1
chr7	101847500	101856999	41	15	1.4531	0.688183	0.00474618	1	0.0151541	1
chr7	101967000	101980999	55	22	1.3478	0.741948	0.00861342	1	0.0257081	1
chr7	102127500	102137499	39	12	1.70327	0.587107	0.0002691	1	0.00118491	1
chr7	102942000	102952999	48	19	1.35623	0.737339	0.0106237	1	0.0312353	1
chr7	103315500	103318999	25	7	1.79908	0.55584	0.000655946	1	0.00262598	1
chr7	103322000	103331499	43	14	1.62378	0.615846	0.000464943	1	0.00193423	1
chr7	103351500	103362999	48	10	2.46587	0.405537	1.40414e-09	1	2.56614e-08	1
chr7	103471500	103502999	135	60	1.23417	0.81026	0.00585269	1	0.0182676	1
chr7	103634000	103642499	37	11	1.75295	0.570468	0.000191993	1	0.000881814	1
chr7	103908500	103923999	65	24	1.4614	0.684273	0.000821207	1	0.00319212	1
chr7	104132000	104142999	46	8	2.89083	0.345922	9.58017e-12	1	3.24037e-10	1
chr7	104270500	104278999	32	11	1.5223	0.656902	0.00431081	1	0.0138686	1
chr7	104357500	104366499	44	17	1.38391	0.722593	0.00917477	1	0.0272929	1
chr7	104785000	104802499	83	27	1.66069	0.602161	2.93499e-06	1	2.23317e-05	1
chr7	104843500	104855999	57	16	1.88862	0.529486	1.25214e-06	1	1.04438e-05	1
chr7	105054500	105061499	33	11	1.56843	0.637582	0.00243675	1	0.0083539	1
chr7	105256000	105264499	35	11	1.66069	0.602161	0.000719594	1	0.00282884	1
chr7	105321000	105337999	70	22	1.70882	0.585198	4.99e-06	1	3.51523e-05	1
chr7	105398500	105404499	32	8	2.02973	0.492677	1.98017e-05	1	0.00011867	1
chr7	105478500	105481999	26	4	2.98924	0.334534	1.38957e-08	1	1.99787e-07	1
chr7	105943000	105957999	50	18	1.48588	0.673003	0.00163147	1	0.00586123	1
chr7	106104000	106116499	62	23	1.4531	0.688183	0.00115782	1	0.00432309	1
chr7	106128000	106140999	56	23	1.31471	0.760624	0.0131287	1	0.0378387	1
chr7	106178000	106184999	38	12	1.66069	0.602161	0.000509233	1	0.00208148	1
chr7	106312500	106319999	36	12	1.57552	0.63471	0.00169855	1	0.00606365	1
chr7	106391000	106397499	35	7	2.49103	0.40144	6.1083e-08	1	7.40924e-07	1
chr7	106401000	106412499	48	16	1.59556	0.626738	0.000408369	1	0.00171423	1
chr7	106703500	106708999	27	5	2.58329	0.387103	3.27296e-07	1	3.20875e-06	1
chr7	106984500	106995499	44	16	1.46531	0.682449	0.00331952	1	0.0109991	1
chr7	107061000	107067999	31	9	1.7714	0.564525	0.000361158	1	0.0015442	1
chr7	107110500	107117999	38	14	1.43926	0.694801	0.00679838	1	0.0208109	1
chr7	107497000	107507499	52	16	1.72581	0.579437	3.71882e-05	1	0.000206089	1
chr7	107665000	107672999	35	11	1.66069	0.602161	0.000719594	1	0.00282884	1
chr7	107887500	107896499	41	15	1.4531	0.688183	0.00474618	1	0.0151541	1
chr7	107918500	107925999	51	16	1.69325	0.590581	6.95636e-05	1	0.000361952	1
chr7	108083000	108090999	35	10	1.81166	0.55198	0.000129375	1	0.000626817	1
chr7	108274500	108285499	54	21	1.38391	0.722593	0.00541914	1	0.0169844	1
chr7	108532500	108540999	31	11	1.47617	0.677431	0.00742305	1	0.0225433	1
chr7	108601000	108611499	53	16	1.75837	0.568707	1.95322e-05	1	0.00011784	1
chr7	108803000	108815499	49	20	1.31801	0.758722	0.0165386	1	0.0467355	1
chr7	109287000	109297499	42	15	1.4877	0.672179	0.00289696	1	0.00972205	1
chr7	109500000	109511499	49	16	1.62812	0.614204	0.000230583	1	0.00103721	1
chr7	109524000	109540499	66	15	2.31804	0.431399	7.8337e-11	1	2.048e-09	1
chr7	109860500	109868999	34	9	1.93747	0.516138	3.6842e-05	1	0.000205476	1
chr7	110253000	110260499	32	10	1.66069	0.602161	0.00101649	1	0.00382667	1
chr7	110453000	110459999	42	13	1.70023	0.588157	0.000192126	1	0.000877244	1
chr7	111137500	111149999	49	12	2.12909	0.469685	1.37804e-07	1	1.52266e-06	1
chr7	111198000	111206999	42	14	1.58688	0.630168	0.000830177	1	0.00321829	1
chr7	111259000	111266499	43	12	1.8736	0.533733	1.67357e-05	1	0.000102146	1
chr7	111343000	111346999	27	4	3.09995	0.322586	3.54518e-09	1	5.89171e-08	1
chr7	111486500	111504499	66	15	2.31804	0.431399	7.8337e-11	1	2.048e-09	1
chr7	111536000	111546499	39	10	2.01295	0.496782	5.79039e-06	1	4.03365e-05	1
chr7	111551000	111561999	45	17	1.41466	0.706884	0.00591915	1	0.018451	1
chr7	111805000	111812499	35	11	1.66069	0.602161	0.000719594	1	0.00282884	1
chr7	111901000	111914499	59	20	1.58161	0.632269	0.000172831	1	0.000810621	1
chr7	111927500	111939999	60	12	2.59748	0.384988	3.64582e-12	1	1.34886e-10	1
chr7	111974000	111992999	76	29	1.42081	0.703824	0.000854374	1	0.00329346	1
chr7	112755000	112771499	80	22	1.9495	0.512952	6.31143e-09	1	9.95988e-08	1
chr7	113068500	113076499	35	10	1.81166	0.55198	0.000129375	1	0.000626817	1
chr7	113102000	113108999	34	13	1.38391	0.722593	0.015564	1	0.044277	1
chr7	113117500	113121999	28	3	4.01333	0.24917	1.17594e-12	1	5.09761e-11	1
chr7	113225000	113235999	42	11	1.9836	0.504134	4.65116e-06	1	3.29103e-05	1
chr7	113269500	113280999	42	8	2.6448	0.378101	9.77093e-10	1	1.85641e-08	1
chr7	113748000	113760499	42	15	1.4877	0.672179	0.00289696	1	0.00972205	1
chr7	113856000	113867999	58	20	1.55525	0.642985	0.000293342	1	0.00128049	1
chr7	114335500	114344499	39	12	1.70327	0.587107	0.0002691	1	0.00118491	1
chr7	114607000	114622499	58	20	1.55525	0.642985	0.000293342	1	0.00128049	1
chr7	114738000	114746999	42	13	1.70023	0.588157	0.000192126	1	0.000877244	1
chr7	114752000	114762999	45	13	1.81885	0.549799	2.56318e-05	1	0.000147853	1
chr7	114805500	114817499	46	18	1.36934	0.73028	0.00991475	1	0.0292494	1
chr7	115307000	115315999	36	13	1.46299	0.683534	0.0059706	1	0.0185291	1
chr7	115578500	115588999	44	10	2.26457	0.441584	7.03476e-08	1	8.18135e-07	1
chr7	115616500	115628499	50	13	2.01655	0.495897	5.9662e-07	1	5.36827e-06	1
chr7	115845500	115851499	25	9	1.43926	0.694801	0.0156729	1	0.0444593	1
chr7	116018500	116027999	46	16	1.53044	0.653408	0.00121029	1	0.00449164	1
chr7	116217500	116224499	38	10	1.96263	0.50952	1.30594e-05	1	8.1967e-05	1
chr7	116381000	116393499	45	18	1.3402	0.746155	0.0148635	1	0.0424521	1
chr7	116752500	116760499	40	11	1.89134	0.528726	2.20729e-05	1	0.000130461	1
chr7	116763500	116770499	33	8	2.09124	0.478186	8.25577e-06	1	5.50333e-05	1
chr7	116815000	116822999	40	15	1.4185	0.704968	0.00761242	1	0.0230115	1
chr7	116898500	116912499	51	11	2.39877	0.41688	1.4875e-09	1	2.676e-08	1
chr7	117390500	117407999	69	26	1.43516	0.696786	0.00100301	1	0.00381633	1
chr7	117475500	117482499	39	9	2.21425	0.45162	4.84974e-07	1	4.53967e-06	1
chr7	117563000	117576999	58	23	1.36084	0.73484	0.00620511	1	0.0191825	1
chr7	117648500	117658999	51	18	1.51501	0.660061	0.000993273	1	0.0037843	1
chr7	118090500	118099499	40	14	1.51307	0.660908	0.00248241	1	0.00845306	1
chr7	118212500	118221499	36	14	1.36545	0.732357	0.0170023	1	0.0479094	1
chr7	118401000	118406999	28	8	1.7837	0.560632	0.000489714	1	0.0020215	1
chr7	118555500	118567999	41	14	1.54997	0.645172	0.00145116	1	0.00524618	1
chr7	118660500	118673999	45	17	1.41466	0.706884	0.00591915	1	0.018451	1
chr7	119039500	119047999	30	10	1.56004	0.64101	0.00350392	1	0.0115569	1
chr7	119558500	119568999	47	16	1.563	0.639796	0.000709767	1	0.00280785	1
chr7	119748500	119758499	35	12	1.53294	0.652341	0.00299113	1	0.00997414	1
chr7	119907000	119910499	27	7	1.93747	0.516138	0.000131603	1	0.000632292	1
chr7	120642000	120647499	32	5	3.04459	0.328451	6.49619e-10	1	1.32426e-08	1
chr7	120775000	120791499	71	25	1.53294	0.652341	0.000140736	1	0.000665947	1
chr7	120801500	120807999	32	9	1.82676	0.547419	0.000173504	1	0.000808899	1
chr7	120871000	120878999	41	13	1.66069	0.602161	0.000360341	1	0.00155224	1
chr7	120942500	120948499	28	6	2.29333	0.436047	3.55909e-06	1	2.61606e-05	1
chr7	121273500	121278999	31	8	1.96822	0.508073	4.61663e-05	1	0.000252537	1
chr7	121383000	121416499	125	39	1.74372	0.573486	1.61888e-09	1	2.89787e-08	1
chr7	121448500	121456499	39	10	2.01295	0.496782	5.79039e-06	1	4.03365e-05	1
chr7	121477000	121484999	33	11	1.56843	0.637582	0.00243675	1	0.0083539	1
chr7	121689000	121697999	35	10	1.81166	0.55198	0.000129375	1	0.000626817	1
chr7	121727000	121739499	46	18	1.36934	0.73028	0.00991475	1	0.0292494	1
chr7	121921000	121930499	36	13	1.46299	0.683534	0.0059706	1	0.0185291	1
chr7	122096500	122109999	47	14	1.7714	0.564525	3.72506e-05	1	0.000205761	1
chr7	122378500	122384999	31	10	1.61036	0.620978	0.00191403	1	0.0067376	1
chr7	122690500	122701499	48	13	1.93747	0.516138	2.8462e-06	1	2.1725e-05	1
chr7	123001000	123008499	41	7	2.9062	0.344092	6.18355e-11	1	1.64195e-09	1
chr7	123098000	123105499	32	11	1.5223	0.656902	0.00431081	1	0.0138686	1
chr7	123561000	123569499	36	10	1.86198	0.537062	6.17629e-05	1	0.000324709	1
chr7	123601500	123615499	73	26	1.51717	0.659122	0.000162022	1	0.000761906	1
chr7	123622500	123633499	52	18	1.54415	0.647607	0.000594196	1	0.00238907	1
chr7	123641500	123647499	34	9	1.93747	0.516138	3.6842e-05	1	0.000205476	1
chr7	123870500	123877999	35	11	1.66069	0.602161	0.000719594	1	0.00282884	1
chr7	124009000	124024499	80	24	1.79354	0.557556	2.13302e-07	1	2.14299e-06	1
chr7	124504500	124520499	75	21	1.91231	0.522929	3.52351e-08	1	4.50759e-07	1
chr7	124646000	124653499	34	9	1.93747	0.516138	3.6842e-05	1	0.000205476	1
chr7	124683000	124689499	31	11	1.47617	0.677431	0.00742305	1	0.0225433	1
chr7	124871500	124889499	70	29	1.3101	0.763302	0.00825168	1	0.0248137	1
chr7	125145000	125154999	37	12	1.61811	0.618007	0.000941251	1	0.00360087	1
chr7	125283000	125291499	35	10	1.81166	0.55198	0.000129375	1	0.000626817	1
chr7	125304500	125314999	43	17	1.35315	0.739015	0.0139453	1	0.040096	1
chr7	125601500	125621499	67	25	1.44778	0.690714	0.000911173	1	0.00350256	1
chr7	126116500	126123499	35	11	1.66069	0.602161	0.000719594	1	0.00282884	1
chr7	126772000	126787499	53	14	1.99282	0.5018	4.7345e-07	1	4.45644e-06	1
chr7	127426000	127438999	58	19	1.63301	0.612367	8.10493e-05	1	0.000415777	1
chr7	127452000	127460499	41	12	1.78843	0.559149	7.01539e-05	1	0.000363512	1
chr7	127838500	127846499	39	14	1.47617	0.677431	0.00415423	1	0.0134809	1
chr7	127860500	127863999	22	4	2.54639	0.392713	2.27229e-06	1	1.76724e-05	1
chr7	127883000	127907999	114	29	2.12199	0.471256	5.65174e-14	1	3.68054e-12	1
chr7	127969000	127985499	62	23	1.4531	0.688183	0.00115782	1	0.00432309	1
chr7	128202500	128228999	136	60	1.24325	0.804346	0.00452876	1	0.0145065	1
chr7	128444000	128464499	93	29	1.7345	0.576537	1.45034e-07	1	1.5946e-06	1
chr7	129245500	129259999	75	23	1.75295	0.570468	1.04855e-06	1	9.0121e-06	1
chr7	129495000	129501499	36	14	1.36545	0.732357	0.0170023	1	0.0479094	1
chr7	129917000	129925999	38	13	1.54207	0.648481	0.00208101	1	0.00723165	1
chr7	130004500	130011499	37	9	2.10354	0.47539	2.95555e-06	1	2.23463e-05	1
chr7	130018500	130024999	37	11	1.75295	0.570468	0.000191993	1	0.000881814	1
chr7	130198000	130204499	38	4	4.31779	0.2316	1.36493e-16	1	1.71563e-14	1
chr7	130273000	130281499	45	12	1.95876	0.510527	3.66556e-06	1	2.63247e-05	1
chr7	130467500	130482499	62	23	1.4531	0.688183	0.00115782	1	0.00432309	1
chr7	130513500	130522499	40	9	2.26961	0.440605	1.89519e-07	1	1.96156e-06	1
chr7	130683500	130698499	60	14	2.25115	0.444217	1.30632e-09	1	2.44004e-08	1
chr7	130855000	130856499	17	3	2.49103	0.40144	1.56269e-05	1	9.66699e-05	1
chr7	130978500	131002999	99	38	1.41939	0.704528	0.000227521	1	0.00103133	1
[truncated: 3,149 more rows]

## Sheet: H3K27me3_SW1116
Chromosome	Start	End	KO	WT	FC_KO	FC_WT	P_KO	P_WT	FDR_KO	FDR_WT
chr1	895500	907499	57	19	2.25343	0.443769	5.7611e-09	1	7.29098e-08	1
chr1	915500	932999	85	45	1.45273	0.688357	0.000332729	1	0.0012451	1
chr1	978500	987999	46	19	1.82605	0.547629	3.3067e-05	1	0.000157816	1
chr1	994500	1004499	40	21	1.44813	0.690547	0.00730669	1	0.0205208	1
chr1	1032500	1063499	142	60	1.82159	0.54897	1.41742e-11	1	3.63439e-10	1
chr1	1067000	1075499	38	21	1.37749	0.72596	0.0176998	1	0.0462321	1
chr1	1160500	1186499	124	45	2.11153	0.47359	1.53199e-14	1	9.15555e-13	1
chr1	1216500	1244499	146	48	2.33113	0.428976	2.60196e-20	1	6.83843e-18	1
chr1	1261000	1276499	73	16	3.38242	0.295646	7.73504e-20	1	1.80703e-17	1
chr1	1329000	1338499	40	21	1.44813	0.690547	0.00730669	1	0.0205208	1
chr1	1341500	1349999	45	8	3.97156	0.25179	2.99583e-16	1	2.71184e-14	1
chr1	1358000	1365499	35	16	1.6455	0.607717	0.00131039	1	0.00430615	1
chr1	1368500	1375999	35	11	2.33113	0.428976	8.33648e-07	1	6.05832e-06	1
chr1	1383000	1390499	33	8	2.9355	0.340658	4.34318e-09	1	5.67669e-08	1
chr1	1394000	1402999	54	15	2.67109	0.374379	2.53983e-11	1	6.16382e-10	1
chr1	1406500	1412499	32	5	4.27374	0.233987	1.09284e-13	1	5.09579e-12	1
chr1	1477000	1496499	80	23	2.62252	0.381312	5.60647e-15	1	3.71537e-13	1
chr1	1560000	1565999	31	12	1.91272	0.522815	0.000150632	1	0.000611357	1
chr1	1620000	1630999	58	27	1.63734	0.610746	0.000111124	1	0.000465128	1
chr1	1835500	1852499	69	36	1.47008	0.680234	0.000711656	1	0.00247525	1
chr1	1906500	1929999	101	43	1.80133	0.555146	1.26438e-08	1	1.47765e-07	1
chr1	1940000	1991499	194	119	1.2627	0.791956	0.000642971	1	0.00226411	1
chr1	1999000	2022999	95	37	1.96306	0.509409	4.76443e-10	1	8.05496e-09	1
chr1	2028500	2033999	15	33	0.365668	2.73472	1	0.00155367	1	0.0161862
chr1	2037000	2044999	22	43	0.406182	2.46195	1	0.00376372	1	0.0329475
chr1	2068000	2075499	39	12	2.3909	0.418252	1.3573e-07	1	1.19861e-06	1
chr1	2085000	2102999	81	37	1.67678	0.596382	3.81321e-06	1	2.35555e-05	1
chr1	2133000	2140499	47	10	3.39074	0.294921	5.09219e-14	1	2.63768e-12	1
chr1	2170500	2181499	59	24	1.8649	0.53622	2.24851e-06	1	1.45668e-05	1
chr1	2185000	2199499	63	34	1.42088	0.703789	0.00241598	1	0.00744578	1
chr1	2224000	2240999	66	30	1.67942	0.595445	2.15168e-05	1	0.000108667	1
chr1	2297500	2314499	80	33	1.85119	0.540192	9.49995e-08	1	8.62473e-07	1
chr1	2317500	2344999	114	58	1.51458	0.660251	8.8593e-06	1	4.97869e-05	1
chr1	2387500	2402999	65	28	1.76844	0.565469	4.84366e-06	1	2.92491e-05	1
chr1	2461000	2464999	29	5	3.88522	0.257386	1.37306e-11	1	3.54025e-10	1
chr1	2475500	2502499	128	54	1.82252	0.548691	1.15257e-10	1	2.30395e-09	1
chr1	2508000	2548999	196	90	1.68217	0.59447	4.40485e-12	1	1.29448e-10	1
chr1	2555500	2582999	101	56	1.3905	0.719166	0.000514613	1	0.00184041	1
chr1	2796500	2814999	77	28	2.08998	0.478474	9.57426e-10	1	1.4987e-08	1
chr1	2860500	2867999	40	14	2.12392	0.470828	2.35511e-06	1	1.4964e-05	1
chr1	2904000	2916999	58	25	1.76329	0.567121	1.4213e-05	1	7.42277e-05	1
chr1	2999500	3007499	44	8	3.88522	0.257386	1.34658e-15	1	1.05572e-13	1
chr1	3019500	3041999	106	42	1.93357	0.517177	1.39618e-10	1	2.74932e-09	1
chr1	3093500	3107499	69	21	2.47241	0.404463	4.11735e-12	1	1.2327e-10	1
chr1	3134500	3145999	51	27	1.44308	0.692962	0.00371891	1	0.0110825	1
chr1	3226500	3245999	85	31	2.0883	0.478857	1.70415e-10	1	3.25732e-09	1
chr1	3252500	3264999	47	14	2.48654	0.402165	3.552e-09	1	4.76236e-08	1
chr1	3282500	3304499	83	33	1.91975	0.5209	1.22879e-08	1	1.44042e-07	1
chr1	3420500	3425499	30	12	1.85295	0.53968	0.000320033	1	0.00120933	1
chr1	3428500	3433499	33	12	2.03227	0.492061	3.06212e-05	1	0.000148176	1
chr1	3478000	3483499	31	9	2.48654	0.402165	5.96293e-07	1	4.47036e-06	1
chr1	3523500	3543499	94	43	1.67771	0.596051	8.04716e-07	1	5.8702e-06	1
chr1	3547000	3571499	113	57	1.52729	0.654753	6.70804e-06	1	3.85115e-05	1
chr1	3574500	3579999	36	13	2.05362	0.486946	1.29037e-05	1	6.84253e-05	1
chr1	3602500	3615999	52	20	1.96111	0.509915	1.68717e-06	1	1.13449e-05	1
chr1	3679000	3692999	63	20	2.36813	0.422274	1.62981e-10	1	3.14512e-09	1
chr1	3696500	3721499	113	29	2.95277	0.338666	5.73358e-24	1	3.58395e-21	1
chr1	3814500	3826999	61	28	1.66127	0.601951	5.33073e-05	1	0.000243895	1
chr1	3857500	3869999	55	23	1.8131	0.551541	9.89406e-06	1	5.47374e-05	1
chr1	3939000	3955999	73	32	1.74246	0.573901	2.64134e-06	1	1.66682e-05	1
chr1	3963000	3983999	97	31	2.3797	0.420222	6.478e-15	1	4.13876e-13	1
chr1	4327000	4335499	43	13	2.44214	0.409477	2.19947e-08	1	2.4046e-07	1
chr1	4471000	4483999	58	16	2.6968	0.37081	4.0084e-12	1	1.21106e-10	1
chr1	4658500	4662499	8	22	0.304061	3.28882	1	0.000438466	1	0.00581137
chr1	4726500	4733499	38	17	1.68359	0.593967	0.000602438	1	0.00212737	1
chr1	5143000	5145499	6	16	0.319959	3.1254	1	0.0026246	1	0.0243489
chr1	5393000	5401499	38	14	2.02031	0.494973	1.23286e-05	1	6.62722e-05	1
chr1	5519500	5526499	32	14	1.7095	0.584968	0.000974366	1	0.00327903	1
chr1	5682500	5695499	51	21	1.83665	0.54447	1.2897e-05	1	6.86653e-05	1
chr1	5775000	5786999	41	18	1.71768	0.582182	0.000274911	1	0.00105189	1
chr1	5825500	5833999	36	13	2.05362	0.486946	1.29037e-05	1	6.84253e-05	1
chr1	5837000	5874999	147	93	1.22343	0.817374	0.00680793	1	0.0192463	1
chr1	6078000	6094999	75	35	1.64043	0.609598	1.62275e-05	1	8.41219e-05	1
chr1	6126000	6154499	130	43	2.31347	0.432251	4.06852e-18	1	5.88104e-16	1
chr1	6222000	6239499	73	26	2.12967	0.469555	1.04006e-09	1	1.60577e-08	1
chr1	6275000	6284499	44	22	1.5203	0.657764	0.0022966	1	0.00714161	1
chr1	6415000	6427499	69	33	1.5998	0.62508	6.71015e-05	1	0.000298275	1
chr1	6441000	6456499	56	16	2.60538	0.383821	3.29255e-11	1	7.64559e-10	1
chr1	6495000	6512999	88	30	2.23087	0.448256	2.95153e-12	1	9.00566e-11	1
chr1	6571000	6584499	71	32	1.69537	0.589843	8.68098e-06	1	4.88917e-05	1
chr1	6627000	6637999	40	20	1.51709	0.659159	0.00333579	1	0.0100443	1
chr1	6717500	6732999	56	21	2.01325	0.49671	3.41663e-07	1	2.73189e-06	1
chr1	6738500	6747999	40	13	2.27563	0.439439	3.88827e-07	1	3.04789e-06	1
chr1	6963000	6973499	42	15	2.0883	0.478857	2.30926e-06	1	1.48213e-05	1
chr1	7007500	7017999	49	20	1.8501	0.54051	1.46345e-05	1	7.62657e-05	1
chr1	7228500	7237999	35	17	1.55409	0.643465	0.00344776	1	0.0103236	1
chr1	7348500	7359999	50	19	1.98146	0.504678	1.836e-06	1	1.2269e-05	1
chr1	7419500	7425499	36	8	3.19451	0.313037	9.85427e-11	1	2.00713e-09	1
chr1	7439000	7452999	61	26	1.78432	0.560437	6.49185e-06	1	3.73584e-05	1
chr1	7602500	7629999	113	46	1.88474	0.530576	1.73206e-10	1	3.30249e-09	1
chr1	7633000	7649499	78	38	1.57401	0.635319	4.63845e-05	1	0.000216461	1
chr1	7653000	7673499	70	36	1.49108	0.670653	0.000454041	1	0.00164787	1
chr1	7857500	7869499	40	11	2.6549	0.376662	4.92604e-09	1	6.36833e-08	1
chr1	8278000	8285499	40	13	2.27563	0.439439	3.88827e-07	1	3.04789e-06	1
chr1	8377500	8381499	28	5	3.75571	0.266261	6.45634e-11	1	1.39228e-09	1
chr1	8852500	8859499	48	8	4.23057	0.236375	2.90939e-18	1	4.29958e-16	1
chr1	8996500	9006499	15	34	0.35522	2.81516	1	0.000832231	1	0.0101733
chr1	9034000	9043999	52	23	1.71597	0.58276	6.71419e-05	1	0.000298082	1
chr1	9124500	9147499	89	34	1.99811	0.500472	6.29716e-10	1	1.03955e-08	1
chr1	9243500	9251999	43	14	2.27933	0.438726	1.65563e-07	1	1.42453e-06	1
chr1	9344500	9373499	126	62	1.56642	0.638398	6.78746e-07	1	5.02901e-06	1
chr1	9443000	9453999	43	23	1.42458	0.701961	0.00786758	1	0.021984	1
chr1	9485500	9489499	38	7	3.78809	0.263985	1.31667e-13	1	5.92449e-12	1
chr1	9536500	9546999	43	22	1.48652	0.672713	0.00376372	1	0.01119	1
chr1	9635000	9642999	33	9	2.64195	0.378509	6.92694e-08	1	6.5915e-07	1
chr1	9710000	9720999	53	20	1.99811	0.500472	7.91936e-07	1	5.78518e-06	1
chr1	9728000	9736499	44	9	3.4967	0.285984	7.72446e-14	1	3.81326e-12	1
chr1	9770500	9784499	47	23	1.55409	0.643465	0.00114395	1	0.00379399	1
chr1	9882500	9895999	62	19	2.44769	0.408549	5.67001e-11	1	1.23306e-09	1
chr1	9995000	10020499	79	42	1.44566	0.691724	0.000569623	1	0.00202183	1
chr1	10167000	10169499	3	17	0.172676	5.79118	1	1.49423e-07	1	7.75725e-06
chr1	10448000	10451999	29	9	2.33113	0.428976	4.55877e-06	1	2.77206e-05	1
chr1	10551000	10556999	9	27	0.277516	3.6034	1	3.07383e-05	1	0.000674174
chr1	10746000	10751999	32	7	3.2053	0.311983	6.09055e-10	1	1.01049e-08	1
chr1	10777000	10799999	98	40	1.87628	0.532971	2.71088e-09	1	3.722e-08	1
chr1	10811500	10823999	52	24	1.64733	0.607042	0.000185893	1	0.000738211	1
chr1	10899500	10916999	75	24	2.36221	0.423332	5.66639e-12	1	1.63815e-10	1
chr1	10935500	10950499	68	32	1.62473	0.615488	4.68549e-05	1	0.000218458	1
chr1	10953500	10964499	51	27	1.44308	0.692962	0.00371891	1	0.0110825	1
chr1	11038500	11048499	47	11	3.10817	0.321732	1.41347e-12	1	4.83589e-11	1
chr1	11052500	11057999	35	13	1.99811	0.500472	2.91073e-05	1	0.000141889	1
chr1	11168000	11184999	61	17	2.67648	0.373625	1.83798e-12	1	6.16069e-11	1
chr1	11292500	11304499	54	19	2.13687	0.467974	7.56849e-08	1	7.04403e-07	1
chr1	11327000	11331999	35	7	3.4967	0.285984	1.01077e-11	1	2.74219e-10	1
chr1	11382000	11406999	90	35	1.96419	0.509115	1.18852e-09	1	1.7896e-08	1
chr1	11550500	11557499	36	15	1.79691	0.55651	0.00022096	1	0.000863235	1
chr1	11616000	11621999	32	14	1.7095	0.584968	0.000974366	1	0.00327903	1
chr1	11694500	11721499	107	40	2.04685	0.488556	4.47305e-12	1	1.31285e-10	1
chr1	11784000	11801499	65	25	1.9725	0.506972	1.16207e-07	1	1.0381e-06	1
chr1	11854000	11862499	37	20	1.40608	0.711198	0.0139186	1	0.0370372	1
chr1	11937500	11943999	32	7	3.2053	0.311983	6.09055e-10	1	1.01049e-08	1
chr1	11987500	12010499	76	36	1.61709	0.618395	2.34137e-05	1	0.000116756	1
chr1	12161000	12168999	38	17	1.68359	0.593967	0.000602438	1	0.00212737	1
chr1	12176000	12183499	37	11	2.46064	0.406399	1.15363e-07	1	1.03436e-06	1
chr1	12211500	12222499	48	17	2.11529	0.472749	4.16706e-07	1	3.20878e-06	1
chr1	12229500	12244499	50	27	1.41533	0.706549	0.00574065	1	0.0164952	1
chr1	12281000	12290999	17	34	0.399622	2.50236	1	0.0058715	1	0.0468101
chr1	12450000	12458999	34	12	2.09204	0.478002	1.32439e-05	1	6.97815e-05	1
chr1	12560000	12571499	47	24	1.49192	0.670276	0.00258757	1	0.00793757	1
chr1	12725000	12729999	30	8	2.67648	0.373625	1.48437e-07	1	1.29549e-06	1
chr1	13421000	13430999	40	8	3.53987	0.282497	4.40402e-13	1	1.72638e-11	1
chr1	13829000	13835999	33	17	1.46775	0.681315	0.00974899	1	0.0267261	1
chr1	14173500	14186999	43	16	2.01117	0.497223	4.94481e-06	1	2.97551e-05	1
chr1	14439500	14442499	7	18	0.327176	3.05646	1	0.00245111	1	0.0233674
chr1	14445000	14452999	35	8	3.10817	0.321732	3.57615e-10	1	6.26823e-09	1
chr1	14512500	14513499	2	15	0.145696	6.86362	1	1.59031e-08	1	1.17699e-06
chr1	14631000	14640499	41	15	2.03974	0.490259	5.23245e-06	1	3.11055e-05	1
chr1	14713500	14734999	92	50	1.41696	0.705735	0.000464684	1	0.00168004	1
chr1	14748500	14755499	38	14	2.02031	0.494973	1.23286e-05	1	6.62722e-05	1
chr1	14802000	14820999	65	37	1.3496	0.740959	0.00669114	1	0.0189404	1
chr1	14909000	14927499	66	30	1.67942	0.595445	2.15168e-05	1	0.000108667	1
chr1	14996500	15006499	40	17	1.76993	0.564993	0.000167305	1	0.000671308	1
chr1	15041500	15057999	66	28	1.79524	0.557029	2.56443e-06	1	1.61983e-05	1
chr1	15136500	15142499	37	17	1.64043	0.609598	0.00110387	1	0.00368189	1
chr1	15177000	15180499	5	21	0.211921	4.71874	1	1.20845e-06	1	4.60445e-05
chr1	15345500	15352999	32	14	1.7095	0.584968	0.000974366	1	0.00327903	1
chr1	15381500	15389999	40	12	2.45068	0.408051	5.04365e-08	1	4.98715e-07	1
chr1	15421000	15431999	67	19	2.64195	0.378509	3.79756e-13	1	1.51171e-11	1
chr1	15688500	15698999	34	14	1.8131	0.551541	0.000251893	1	0.000974373	1
chr1	15723000	15738499	71	33	1.6455	0.607717	2.28317e-05	1	0.000114632	1
chr1	15832000	15836499	28	9	2.25343	0.443769	1.20305e-05	1	6.50478e-05	1
chr1	15928500	15948999	87	38	1.75333	0.570344	3.12402e-07	1	2.52233e-06	1
chr1	15997500	16005499	40	8	3.53987	0.282497	4.40402e-13	1	1.72638e-11	1
chr1	16127500	16146499	71	32	1.69537	0.589843	8.68098e-06	1	4.88917e-05	1
chr1	16233500	16242999	42	23	1.3922	0.718286	0.0121251	1	0.032686	1
chr1	16442000	16451499	43	24	1.3676	0.73121	0.0151921	1	0.0401949	1
chr1	16471500	16473499	2	16	0.137125	7.2926	1	2.38484e-09	1	2.30299e-07
chr1	16605500	16646499	291	142	1.58669	0.630243	6.3729e-14	1	3.21116e-12	1
chr1	16906000	16916999	45	15	2.234	0.447628	1.7424e-07	1	1.48374e-06	1
chr1	16931000	16949499	72	42	1.31917	0.758054	0.00807807	1	0.0224555	1
chr1	16954500	16964499	47	10	3.39074	0.294921	5.09219e-14	1	2.63768e-12	1
chr1	17095000	17101499	33	16	1.55409	0.643465	0.00414967	1	0.0122127	1
chr1	17264000	17279499	56	26	1.64043	0.609598	0.000131968	1	0.00054391	1
chr1	17301500	17309999	34	16	1.5998	0.62508	0.00236206	1	0.00732498	1
chr1	17332000	17352499	86	52	1.27552	0.783991	0.0104844	1	0.0285811	1
chr1	17516500	17526999	49	17	2.15845	0.463295	1.79752e-07	1	1.51093e-06	1
chr1	17545000	17558999	57	15	2.81678	0.355015	9.61959e-13	1	3.4123e-11	1
chr1	17562500	17583499	93	35	2.02895	0.492866	1.31244e-10	1	2.59436e-09	1
chr1	17613000	17625999	53	15	2.62252	0.381312	7.30378e-11	1	1.55904e-09	1
chr1	17708000	17714499	27	12	1.67363	0.597503	0.00256114	1	0.00787374	1
chr1	17718000	17726499	34	15	1.69978	0.58831	0.000832231	1	0.00285069	1
chr1	17787500	17802499	59	22	2.02707	0.493323	1.47438e-07	1	1.29091e-06	1
chr1	17882000	17887999	30	10	2.18985	0.456652	1.28866e-05	1	6.88716e-05	1
chr1	17926500	17941999	58	31	1.43267	0.697995	0.00274334	1	0.00839703	1
chr1	17996000	18008499	55	22	1.89193	0.52856	2.84761e-06	1	1.79088e-05	1
chr1	18028500	18035999	39	15	1.94261	0.514772	2.51007e-05	1	0.000124818	1
chr1	18043500	18054499	60	28	1.63447	0.611819	9.35414e-05	1	0.000399009	1
chr1	18525500	18542999	65	36	1.38608	0.72146	0.00376192	1	0.0111969	1
chr1	18628000	18653999	104	41	1.94261	0.514772	1.555e-10	1	3.05039e-09	1
chr1	18738500	18745499	37	12	2.27136	0.440265	9.14568e-07	1	6.54966e-06	1
chr1	18790500	18800499	53	27	1.49858	0.667297	0.00148227	1	0.00480206	1
chr1	18806500	18822499	64	32	1.53054	0.653364	0.000366502	1	0.00135939	1
chr1	18874500	18880499	33	10	2.40177	0.416359	7.2599e-07	1	5.35759e-06	1
chr1	18890000	18901499	51	28	1.39332	0.71771	0.00724122	1	0.0203815	1
chr1	18932000	18941999	45	15	2.234	0.447628	1.7424e-07	1	1.48374e-06	1
chr1	18961000	18974999	52	20	1.96111	0.509915	1.68717e-06	1	1.13449e-05	1
chr1	19031000	19047999	70	34	1.57629	0.634402	9.43801e-05	1	0.000401956	1
chr1	19137500	19147999	36	17	1.59726	0.626074	0.00197481	1	0.00621491	1
chr1	19308000	19323999	66	30	1.67942	0.595445	2.15168e-05	1	0.000108667	1
chr1	19348500	19354999	33	14	1.7613	0.567763	0.000502134	1	0.00180542	1
chr1	19470000	19484999	56	28	1.52729	0.654753	0.000759636	1	0.00263362	1
chr1	19563500	19574999	48	23	1.58646	0.630333	0.000673186	1	0.0023517	1
chr1	19649500	19660499	60	22	2.06085	0.485236	6.75417e-08	1	6.44964e-07	1
chr1	19663500	19671499	35	17	1.55409	0.643465	0.00344776	1	0.0103236	1
chr1	19704500	19715999	54	19	2.13687	0.467974	7.56849e-08	1	7.04403e-07	1
chr1	19757000	19770499	58	25	1.76329	0.567121	1.4213e-05	1	7.42277e-05	1
chr1	19920500	19929499	42	20	1.59109	0.6285	0.00115304	1	0.00381565	1
chr1	19969500	19976499	30	9	2.40883	0.415138	1.67408e-06	1	1.13062e-05	1
chr1	20170000	20182999	51	27	1.44308	0.692962	0.00371891	1	0.0110825	1
chr1	20208000	20214499	34	15	1.69978	0.58831	0.000832231	1	0.00285069	1
chr1	20276000	20289499	66	37	1.37005	0.7299	0.00461854	1	0.0134803	1
chr1	20405500	20414499	40	19	1.59294	0.62777	0.00137965	1	0.00449163	1
chr1	20460500	20469499	38	17	1.68359	0.593967	0.000602438	1	0.00212737	1
chr1	20485000	20488499	25	1	10.1016	0.0989946	5.07069e-25	1	3.55378e-22	1
chr1	20716500	20729499	65	15	3.2053	0.311983	7.58119e-17	1	8.23182e-15	1
chr1	21207000	21210499	4	18	0.204485	4.89033	1	2.12266e-06	1	7.43268e-05
chr1	21265000	21291499	109	60	1.40123	0.713661	0.000258056	1	0.000994555	1
chr1	21308500	21329499	72	33	1.66836	0.599392	1.30585e-05	1	6.90167e-05	1
chr1	21334500	21344999	47	21	1.69537	0.589843	0.000170256	1	0.000680731	1
chr1	21590500	21599499	43	20	1.62809	0.614216	0.000656601	1	0.002307	1
chr1	21604500	21612499	39	13	2.22012	0.450425	9.67581e-07	1	6.85082e-06	1
chr1	21644000	21658499	66	29	1.7354	0.576237	7.72497e-06	1	4.39137e-05	1
chr1	21662500	21674499	50	22	1.72301	0.58038	7.8611e-05	1	0.00034079	1
chr1	21847500	21854499	35	13	1.99811	0.500472	2.91073e-05	1	0.000141889	1
chr1	21878500	21889999	52	17	2.28796	0.43707	1.28828e-08	1	1.49952e-07	1
chr1	21910000	21926499	70	29	1.839	0.543773	6.04846e-07	1	4.52129e-06	1
chr1	22076500	22087499	37	14	1.96851	0.507998	2.72131e-05	1	0.000134068	1
chr1	22228000	22247999	83	41	1.55409	0.643465	4.46774e-05	1	0.000208916	1
chr1	22253500	22268999	63	26	1.84188	0.542923	1.74632e-06	1	1.17035e-05	1
chr1	22310500	22319999	42	21	1.51877	0.658429	0.00276694	1	0.0084575	1
chr1	22366000	22373999	38	21	1.37749	0.72596	0.0176998	1	0.0462321	1
chr1	22537000	22546999	45	14	2.38293	0.419651	2.52828e-08	1	2.7065e-07	1
chr1	22747000	22773999	108	50	1.66074	0.602141	2.50686e-07	1	2.06956e-06	1
chr1	22844500	22852499	40	16	1.87405	0.533605	4.76544e-05	1	0.000220983	1
chr1	22876000	22880999	40	7	3.98235	0.251108	6.4284e-15	1	4.15296e-13	1
chr1	22902000	22914499	59	28	1.60768	0.622016	0.000161651	1	0.000651962	1
chr1	23470500	23483999	58	11	3.82046	0.261748	5.39644e-19	1	1.04007e-16	1
chr1	23518500	23528499	49	19	1.94261	0.514772	3.89246e-06	1	2.393e-05	1
chr1	23596500	23610999	57	26	1.6692	0.599088	7.45839e-05	1	0.000325651	1
chr1	23629000	23639999	44	21	1.58941	0.629165	0.000963654	1	0.00325269	1
chr1	23753500	23761499	37	20	1.40608	0.711198	0.0139186	1	0.0370372	1
chr1	24075500	24087999	56	18	2.33113	0.428976	2.21529e-09	1	3.15974e-08	1
chr1	24184000	24194499	47	18	1.96306	0.509409	4.25727e-06	1	2.59966e-05	1
chr1	24293500	24304499	49	11	3.23768	0.308863	1.13851e-13	1	5.19359e-12	1
chr1	24359500	24374499	52	28	1.42011	0.704169	0.00476929	1	0.0139001	1
chr1	24377500	24385499	37	10	2.68433	0.372532	1.06396e-08	1	1.2707e-07	1
chr1	24560500	24570999	41	18	1.71768	0.582182	0.000274911	1	0.00105189	1
chr1	24867000	24874999	36	18	1.51319	0.660856	0.004859	1	0.0141091	1
chr1	24941000	24947999	35	19	1.39868	0.714961	0.0168678	1	0.0442009	1
chr1	24951500	24964999	54	25	1.64375	0.608367	0.000156662	1	0.000633828	1
chr1	25088000	25112499	94	51	1.4196	0.704424	0.000389705	1	0.00143327	1
chr1	25475000	25497499	84	45	1.43584	0.696456	0.000504371	1	0.00181037	1
chr1	25550000	25558999	40	19	1.59294	0.62777	0.00137965	1	0.00449163	1
chr1	25574500	25586999	48	23	1.58646	0.630333	0.000673186	1	0.0023517	1
chr1	25688000	25702499	63	29	1.65769	0.603248	4.50294e-05	1	0.000210328	1
chr1	25721500	25732999	50	25	1.5242	0.656082	0.00131785	1	0.00432207	1
chr1	25810000	25821499	56	27	1.58184	0.632176	0.000328899	1	0.00123237	1
chr1	25862000	25871999	45	18	1.88126	0.531558	1.85524e-05	1	9.50869e-05	1
chr1	26166500	26183499	60	30	1.52902	0.654013	0.000527253	1	0.00188373	1
chr1	26486500	26495499	46	13	2.60865	0.383341	1.02251e-09	1	1.58609e-08	1
chr1	26525000	26546999	88	40	1.68675	0.592855	1.31987e-06	1	9.0649e-06	1
chr1	26788000	26791499	11	26	0.345353	2.89559	1	0.00152567	1	0.0160353
chr1	26797500	26807999	46	15	2.28257	0.438104	7.05954e-08	1	6.68193e-07	1
chr1	26990500	27012499	100	46	1.66982	0.598868	4.89002e-07	1	3.70504e-06	1
chr1	27066000	27079499	51	15	2.52539	0.395978	5.72188e-10	1	9.55147e-09	1
chr1	27108500	27124999	79	39	1.55409	0.643465	6.38227e-05	1	0.000286342	1
chr1	27149000	27155999	36	19	1.43753	0.695637	0.0107111	1	0.029158	1
chr1	27298000	27307499	50	19	1.98146	0.504678	1.836e-06	1	1.2269e-05	1
chr1	27390000	27400999	48	21	1.73069	0.577805	9.18757e-05	1	0.000392882	1
chr1	27525500	27530999	29	12	1.79318	0.557669	0.000660082	1	0.00231432	1
chr1	27583500	27593999	44	19	1.74835	0.571969	0.000124684	1	0.00051545	1
chr1	28587000	28593999	39	17	1.72676	0.579118	0.000321152	1	0.00120833	1
chr1	28802000	28808499	36	8	3.19451	0.313037	9.85427e-11	1	2.00713e-09	1
chr1	28838500	28872499	126	72	1.35184	0.739731	0.000411056	1	0.0015076	1
chr1	28878000	28887499	38	17	1.68359	0.593967	0.000602438	1	0.00212737	1
chr1	29166000	29169999	6	23	0.226638	4.41233	1	2.07084e-06	1	7.45438e-05
chr1	29185500	29205999	85	23	2.78441	0.359143	2.95445e-17	1	3.3827e-15	1
chr1	29219000	29221999	5	19	0.233113	4.28976	1	1.39704e-05	1	0.000356631
chr1	29380000	29386499	30	11	2.00736	0.498166	7.28955e-05	1	0.000320762	1
chr1	29390000	29397999	40	16	1.87405	0.533605	4.76544e-05	1	0.000220983	1
chr1	29402500	29418999	60	30	1.52902	0.654013	0.000527253	1	0.00188373	1
chr1	29468000	29491999	96	57	1.29954	0.769504	0.00473244	1	0.0138049	1
chr1	29630000	29637999	40	12	2.45068	0.408051	5.04365e-08	1	4.98715e-07	1
chr1	29745000	29758999	56	20	2.10912	0.474132	7.37641e-08	1	6.9322e-07	1
chr1	29824000	29837499	63	21	2.26049	0.442382	1.05526e-09	1	1.62166e-08	1
chr1	29848500	29859999	46	18	1.92216	0.520248	8.97677e-06	1	5.03308e-05	1
chr1	30033000	30041999	34	16	1.5998	0.62508	0.00236206	1	0.00732498	1
chr1	30322500	30341499	69	35	1.51092	0.661849	0.000342782	1	0.00128148	1
chr1	30373000	30387999	54	18	2.24934	0.444576	1.34832e-08	1	1.5557e-07	1
chr1	30395000	30405499	50	20	1.88711	0.529912	7.25493e-06	1	4.15327e-05	1
chr1	30458500	30473499	52	25	1.58397	0.631324	0.000470435	1	0.00169884	1
chr1	30662500	30670999	43	14	2.27933	0.438726	1.65563e-07	1	1.42453e-06	1
chr1	30779500	30812499	137	73	1.44908	0.690092	1.24239e-05	1	6.65911e-05	1
chr1	30907500	30923499	51	26	1.49653	0.668213	0.00178372	1	0.00566556	1
chr1	31214500	31232999	80	29	2.09802	0.47664	4.13933e-10	1	7.13105e-09	1
chr1	31364000	31373499	41	17	1.8131	0.551541	8.52106e-05	1	0.000366481	1
chr1	31424000	31432999	43	19	1.7095	0.584968	0.000234773	1	0.000912193	1
chr1	31481000	31492499	41	13	2.33113	0.428976	1.52666e-07	1	1.32615e-06	1
chr1	31563000	31587499	90	47	1.47315	0.67882	0.000151799	1	0.000615174	1
chr1	31631500	31657999	97	41	1.8131	0.551541	1.67894e-08	1	1.87361e-07	1
chr1	31690000	31696499	37	18	1.55409	0.643465	0.00286578	1	0.00871184	1
chr1	31970500	31977999	31	15	1.55409	0.643465	0.00499657	1	0.0144768	1
chr1	32107500	32115499	32	5	4.27374	0.233987	1.09284e-13	1	5.09579e-12	1
chr1	32204000	32223999	73	40	1.40247	0.713028	0.00184091	1	0.00582482	1
chr1	32273000	32281499	38	13	2.16462	0.461975	2.35132e-06	1	1.50059e-05	1
chr1	32751500	32765499	60	33	1.39411	0.717305	0.0043529	1	0.0127751	1
chr1	32868500	32876999	45	15	2.234	0.447628	1.7424e-07	1	1.48374e-06	1
chr1	33261500	33275999	60	27	1.69284	0.590722	3.52469e-05	1	0.0001677	1
chr1	33295500	33314499	66	32	1.57763	0.633861	0.000134737	1	0.000554781	1
chr1	33357000	33377499	87	43	1.55409	0.643465	3.12972e-05	1	0.000150534	1
chr1	33421500	33433499	45	18	1.88126	0.531558	1.85524e-05	1	9.50869e-05	1
chr1	33489000	33504999	66	32	1.57763	0.633861	0.000134737	1	0.000554781	1
chr1	33511000	33522999	57	20	2.14612	0.465957	3.23206e-08	1	3.30538e-07	1
chr1	33599500	33610999	50	19	1.98146	0.504678	1.836e-06	1	1.2269e-05	1
chr1	33648000	33660499	52	25	1.58397	0.631324	0.000470435	1	0.00169884	1
chr1	33689000	33695999	35	16	1.6455	0.607717	0.00131039	1	0.00430615	1
chr1	33709500	33721499	51	25	1.55409	0.643465	0.00079434	1	0.00273711	1
chr1	33770000	33779999	52	18	2.16754	0.461352	7.65248e-08	1	7.06816e-07	1
chr1	33868000	33878999	55	17	2.41747	0.413656	7.84274e-10	1	1.26094e-08	1
chr1	33892500	33906499	47	25	1.43454	0.697087	0.00540154	1	0.0155983	1
chr1	33968500	33986499	73	37	1.51319	0.660856	0.0002386	1	0.000926052	1
chr1	34240000	34247499	11	28	0.321535	3.11008	1	0.000355277	1	0.00521373
chr1	34340000	34350999	38	20	1.44308	0.692962	0.00884198	1	0.0244322	1
chr1	34607000	34613999	45	11	2.97867	0.335721	1.61835e-11	1	4.02898e-10	1
chr1	34740500	34750999	49	24	1.55409	0.643465	0.000953087	1	0.00322525	1
chr1	35684500	35705999	70	32	1.67182	0.59815	1.54319e-05	1	8.01684e-05	1
chr1	36106500	36115499	48	22	1.65544	0.604069	0.000261298	1	0.00100571	1
chr1	36317000	36329499	70	18	2.90369	0.344389	1.20241e-15	1	9.49128e-14	1
chr1	36334500	36351499	94	32	2.23694	0.447039	5.4798e-13	1	2.10003e-11	1
chr1	36366500	36377499	47	16	2.19401	0.455787	1.78846e-07	1	1.50824e-06	1
chr1	36383500	36387999	27	10	1.97793	0.505579	0.000174179	1	0.000695035	1
chr1	36472000	36487499	77	23	2.52539	0.395978	1.13031e-13	1	5.1972e-12	1
chr1	36514500	36524499	47	25	1.43454	0.697087	0.00540154	1	0.0155983	1
chr1	36585500	36600499	72	41	1.35058	0.740425	0.00478036	1	0.0139174	1
chr1	36612500	36624999	49	25	1.49431	0.669203	0.00214771	1	0.00670747	1
chr1	36711500	36718499	11	32	0.282561	3.53906	1	1.32665e-05	1	0.000353692
chr1	36752500	36762499	44	12	2.68977	0.37178	7.6531e-10	1	1.23863e-08	1
chr1	36772500	36786499	64	33	1.48552	0.673163	0.000784332	1	0.00270888	1
chr1	36790000	36803999	60	28	1.63447	0.611819	9.35414e-05	1	0.000399009	1
chr1	36876000	36889999	56	20	2.10912	0.474132	7.37641e-08	1	6.9322e-07	1
chr1	36969500	36982999	58	31	1.43267	0.697995	0.00274334	1	0.00839703	1
chr1	37046500	37060999	57	21	2.04857	0.488146	1.57017e-07	1	1.35807e-06	1
chr1	37064000	37072499	44	22	1.5203	0.657764	0.0022966	1	0.00714161	1
chr1	37101000	37110999	44	9	3.4967	0.285984	7.72446e-14	1	3.81326e-12	1
chr1	37170000	37171999	6	18	0.286279	3.49309	1	0.00042917	1	0.00582845
chr1	37267500	37275999	44	25	1.34488	0.743559	0.0187333	1	0.0487471	1
chr1	37286500	37292499	35	12	2.15181	0.464724	5.57653e-06	1	3.2693e-05	1
chr1	37295500	37303999	36	16	1.69121	0.591292	0.000708867	1	0.00247057	1
chr1	37304500	37306999	3	19	0.155409	6.43465	1	5.72721e-09	1	5.01738e-07
chr1	37406500	37415999	37	11	2.46064	0.406399	1.15363e-07	1	1.03436e-06	1
chr1	37480000	37484499	32	7	3.2053	0.311983	6.09055e-10	1	1.01049e-08	1
chr1	37565000	37567999	24	9	1.94261	0.514772	0.000418052	1	0.00153107	1
chr1	37940000	37956499	93	37	1.92216	0.520248	1.95432e-09	1	2.81441e-08	1
chr1	38115500	38130999	65	24	2.05139	0.487473	2.74771e-08	1	2.9265e-07	1
chr1	38134500	38138499	8	20	0.333019	3.00283	1	0.00222768	1	0.0217575
chr1	38140500	38153499	48	23	1.58646	0.630333	0.000673186	1	0.0023517	1
chr1	38225500	38239999	65	24	2.05139	0.487473	2.74771e-08	1	2.9265e-07	1
chr1	38728500	38738499	38	18	1.59498	0.626965	0.00165071	1	0.00527973	1
chr1	38742500	38751499	39	19	1.55409	0.643465	0.00238303	1	0.00736091	1
chr1	38757000	38768499	51	19	2.02031	0.494973	8.50049e-07	1	6.14565e-06	1
chr1	38808500	38817499	40	21	1.44813	0.690547	0.00730669	1	0.0205208	1
chr1	38829500	38837499	39	20	1.48008	0.675638	0.00549163	1	0.0158288	1
chr1	38860500	38875999	58	22	1.99329	0.501684	3.16755e-07	1	2.54108e-06	1
chr1	38927500	38937499	47	26	1.38141	0.723898	0.0104773	1	0.0285855	1
chr1	39029000	39048499	57	23	1.87786	0.532522	2.53628e-06	1	1.60424e-05	1
chr1	39074500	39087499	49	18	2.04485	0.489033	9.02895e-07	1	6.49422e-06	1
chr1	39318000	39332499	47	23	1.55409	0.643465	0.00114395	1	0.00379399	1
chr1	39477500	39485999	35	14	1.8649	0.53622	0.000123076	1	0.000510536	1
chr1	39673500	39677999	35	14	1.8649	0.53622	0.000123076	1	0.000510536	1
chr1	39813500	39821999	40	22	1.38516	0.721936	0.0146435	1	0.0388233	1
chr1	39946500	39959499	51	28	1.39332	0.71771	0.00724122	1	0.0203815	1
chr1	40071000	40081499	40	22	1.38516	0.721936	0.0146435	1	0.0388233	1
chr1	40289500	40317999	132	53	1.91383	0.522513	2.57435e-12	1	8.10061e-11	1
chr1	40585500	40596499	45	21	1.62473	0.615488	0.000551572	1	0.00196515	1
chr1	40765000	40779999	56	23	1.84548	0.541865	5.05114e-06	1	3.02964e-05	1
chr1	40783500	40792499	42	11	2.78441	0.359143	5.34754e-10	1	9.00458e-09	1
chr1	41339500	41350999	44	20	1.66509	0.600567	0.000366198	1	0.00136088	1
chr1	41374000	41396999	91	46	1.52102	0.657453	4.73605e-05	1	0.000220304	1
chr1	41428000	41436999	55	31	1.35983	0.735388	0.00923081	1	0.0254291	1
chr1	41609000	41619499	47	16	2.19401	0.455787	1.78846e-07	1	1.50824e-06	1
chr1	41792500	41812999	82	47	1.34364	0.744248	0.00345657	1	0.0103353	1
chr1	42166500	42175999	39	14	2.07212	0.482598	5.45235e-06	1	3.21115e-05	1
chr1	42370500	42383999	53	24	1.67841	0.595801	0.000104062	1	0.000440193	1
chr1	42699500	42707999	29	12	1.79318	0.557669	0.000660082	1	0.00231432	1
chr1	42958500	42980999	86	36	1.8271	0.547315	6.37075e-08	1	6.12906e-07	1
chr1	43269500	43277499	55	12	3.34726	0.298751	1.40183e-15	1	1.07713e-13	1
chr1	43297000	43311499	75	30	1.90501	0.524932	6.94678e-08	1	6.59004e-07	1
chr1	43358000	43366499	40	11	2.6549	0.376662	4.92604e-09	1	6.36833e-08	1
chr1	43379500	43386499	33	15	1.65122	0.605614	0.00155367	1	0.00501373	1
chr1	43415000	43425499	49	16	2.28542	0.437556	3.01399e-08	1	3.15276e-07	1
chr1	43440500	43456499	70	28	1.90242	0.525647	1.75182e-07	1	1.48546e-06	1
chr1	43465000	43468499	5	15	0.291391	3.43181	1	0.00104737	1	0.0118482
chr1	43499500	43509999	43	18	1.79947	0.555719	7.45063e-05	1	0.000326206	1
chr1	43527000	43549499	85	39	1.67064	0.598572	2.73443e-06	1	1.72392e-05	1
chr1	43757500	43766999	13	30	0.350923	2.84963	1	0.00113685	1	0.0122322
chr1	43899000	43912499	52	18	2.16754	0.461352	7.65248e-08	1	7.06816e-07	1
chr1	43976500	43991499	71	25	2.15181	0.464724	1.06882e-09	1	1.63652e-08	1
chr1	44262500	44276999	60	30	1.52902	0.654013	0.000527253	1	0.00188373	1
chr1	44300500	44312499	58	18	2.41292	0.414435	3.4016e-10	1	6.05869e-09	1
chr1	44443000	44450999	32	12	1.9725	0.506972	6.88793e-05	1	0.000304742	1
chr1	44488500	44500999	52	17	2.28796	0.43707	1.28828e-08	1	1.49952e-07	1
chr1	44514500	44524499	56	21	2.01325	0.49671	3.41663e-07	1	2.73189e-06	1
chr1	44535500	44571499	141	66	1.64687	0.607213	9.97687e-09	1	1.19681e-07	1
chr1	44574500	44579499	10	25	0.328749	3.04183	1	0.000839474	1	0.0101651
chr1	44616000	44625999	46	20	1.7391	0.575011	0.000107158	1	0.0004518	1
chr1	44733500	44745999	56	22	1.92572	0.519287	1.39241e-06	1	9.51925e-06	1
chr1	44866500	44875499	43	17	1.89944	0.526471	2.06908e-05	1	0.000104919	1
chr1	45002500	45004999	5	18	0.245382	4.07528	1	4.43333e-05	1	0.000938097
chr1	45297500	45309499	49	14	2.59015	0.386079	4.6056e-10	1	7.8236e-09	1
chr1	45503500	45510999	35	13	1.99811	0.500472	2.91073e-05	1	0.000141889	1
chr1	45639000	45642499	8	19	0.34967	2.85984	1	0.00471378	1	0.0396726
chr1	45747000	45754499	36	13	2.05362	0.486946	1.29037e-05	1	6.84253e-05	1
chr1	46070000	46084499	50	25	1.5242	0.656082	0.00131785	1	0.00432207	1
chr1	46156500	46170499	53	24	1.67841	0.595801	0.000104062	1	0.000440193	1
chr1	46220500	46230499	42	7	4.17661	0.239429	2.85392e-16	1	2.61926e-14	1
chr1	46258500	46266999	38	7	3.78809	0.263985	1.31667e-13	1	5.92449e-12	1
chr1	46271000	46283999	49	15	2.42826	0.411817	4.16171e-09	1	5.48444e-08	1
chr1	46341000	46350999	40	15	1.99117	0.502216	1.15925e-05	1	6.31146e-05	1
chr1	46394500	46420999	120	34	2.68635	0.372252	7.0129e-22	1	2.65892e-19	1
chr1	46436500	46445499	43	17	1.89944	0.526471	2.06908e-05	1	0.000104919	1
chr1	46571000	46582999	51	12	3.10817	0.321732	2.23366e-13	1	9.38423e-12	1
chr1	46667000	46673499	31	10	2.26049	0.442382	5.08635e-06	1	3.04247e-05	1
chr1	47163500	47170999	12	29	0.336719	2.96984	1	0.000660082	1	0.00829469
chr1	47378000	47381499	3	17	0.172676	5.79118	1	1.49423e-07	1	7.75725e-06
chr1	47384500	47399999	52	27	1.47083	0.679887	0.00236796	1	0.0073305	1
chr1	47421000	47428999	42	6	4.77327	0.2095	1.3187e-18	1	2.17074e-16	1
chr1	47566000	47578499	58	27	1.63734	0.610746	0.000111124	1	0.000465128	1
chr1	47620500	47651499	121	54	1.72362	0.580173	7.91078e-09	1	9.73971e-08	1
chr1	47710500	47715999	31	5	4.14423	0.241299	5.64362e-13	1	2.14504e-11	1
chr1	47719000	47727499	41	21	1.48345	0.674106	0.00454438	1	0.0132814	1
chr1	47744500	47756499	42	15	2.0883	0.478857	2.30926e-06	1	1.48213e-05	1
chr1	47825000	47830999	31	14	1.65769	0.603248	0.00183931	1	0.00582773	1
chr1	47946000	47950999	4	21	0.176601	5.66249	1	3.00424e-08	1	1.97112e-06
chr1	48578500	48581999	3	19	0.155409	6.43465	1	5.72721e-09	1	5.01738e-07
chr1	50176500	50189999	47	21	1.69537	0.589843	0.000170256	1	0.000680731	1
chr1	50210500	50213499	1	19	0.0777044	12.8693	1	1.87691e-17	1	4.34092e-14
chr1	51294000	51308499	76	38	1.53416	0.651821	0.000124022	1	0.000513401	1
chr1	51342000	51347999	34	18	1.4314	0.698619	0.0129904	1	0.0348096	1
chr1	51560000	51568499	37	10	2.68433	0.372532	1.06396e-08	1	1.2707e-07	1
chr1	51576500	51587999	54	23	1.78072	0.561569	1.90565e-05	1	9.73471e-05	1
chr1	51903000	51914499	54	20	2.03511	0.491373	3.65231e-07	1	2.8869e-06	1
chr1	51920500	51927499	37	4	5.90553	0.169333	1.40747e-20	1	3.92193e-18	1
chr1	52344500	52354999	37	20	1.40608	0.711198	0.0139186	1	0.0370372	1
chr1	52359000	52361499	24	1	9.71304	0.102954	1.0264e-23	1	5.78991e-21	1
chr1	52609000	52619499	47	17	2.07212	0.482598	9.47415e-07	1	6.74937e-06	1
chr1	52784000	52786999	4	15	0.242826	4.11817	1	9.59692e-05	1	0.00172595
chr1	52907500	52922999	67	28	1.82203	0.548837	1.33861e-06	1	9.18132e-06	1
chr1	53060500	53099499	163	83	1.51709	0.659159	1.71512e-07	1	1.46862e-06	1
chr1	53121000	53125999	28	14	1.50228	0.665653	0.01042	1	0.0284592	1
chr1	53205500	53222499	71	31	1.74835	0.571969	3.08034e-06	1	1.9252e-05	1
chr1	53271000	53310999	178	58	2.35747	0.424183	1.07413e-24	1	7.30663e-22	1
chr1	53377000	53392499	56	25	1.70352	0.58702	4.87627e-05	1	0.000224658	1
chr1	53460500	53468499	41	18	1.71768	0.582182	0.000274911	1	0.00105189	1
chr1	53529500	53537499	42	21	1.51877	0.658429	0.00276694	1	0.0084575	1
chr1	53706000	53715499	43	12	2.62999	0.380229	2.25434e-09	1	3.17144e-08	1
chr1	53725500	53739999	54	25	1.64375	0.608367	0.000156662	1	0.000633828	1
chr1	53846000	53856499	45	15	2.234	0.447628	1.7424e-07	1	1.48374e-06	1
chr1	54093000	54103999	39	12	2.3909	0.418252	1.3573e-07	1	1.19861e-06	1
chr1	54108000	54117499	39	19	1.55409	0.643465	0.00238303	1	0.00736091	1
chr1	54214000	54232499	76	43	1.35983	0.735388	0.00337825	1	0.0101431	1
chr1	54247000	54265499	73	26	2.12967	0.469555	1.04006e-09	1	1.60577e-08	1
chr1	54467000	54475999	38	17	1.68359	0.593967	0.000602438	1	0.00212737	1
chr1	54505500	54514999	41	23	1.35983	0.735388	0.0183101	1	0.0477238	1
chr1	54545500	54559999	52	25	1.58397	0.631324	0.000470435	1	0.00169884	1
chr1	54601500	54612499	54	19	2.13687	0.467974	7.56849e-08	1	7.04403e-07	1
chr1	54644000	54652999	36	9	2.87506	0.347819	2.22567e-09	1	3.15605e-08	1
chr1	54847000	54857999	45	19	1.7872	0.559534	6.48644e-05	1	0.000289359	1
chr1	54863000	54881499	90	29	2.35703	0.424262	8.55673e-14	1	4.15756e-12	1
chr1	54894500	54906499	39	18	1.63588	0.611291	0.000929006	1	0.00315415	1
chr1	55051000	55061999	50	28	1.36652	0.731783	0.0108084	1	0.0293693	1
chr1	55569500	55583499	57	30	1.45382	0.687841	0.00213402	1	0.00667283	1
chr1	55819500	55833499	57	20	2.14612	0.465957	3.23206e-08	1	3.30538e-07	1
chr1	56060000	56068499	38	15	1.89404	0.527971	5.30912e-05	1	0.000243606	1
chr1	56290000	56292499	3	17	0.172676	5.79118	1	1.49423e-07	1	7.75725e-06
chr1	56506000	56520499	57	26	1.6692	0.599088	7.45839e-05	1	0.000325651	1
chr1	56578000	56591999	43	12	2.62999	0.380229	2.25434e-09	1	3.17144e-08	1
chr1	56824500	56833499	13	33	0.319959	3.1254	1	0.000136918	1	0.0023474
chr1	56910500	56921999	48	24	1.52301	0.656597	0.00158502	1	0.0051003	1
chr1	56998000	57003499	10	28	0.294741	3.39281	1	7.54771e-05	1	0.00140268
chr1	58556000	58561999	9	22	0.337845	2.95994	1	0.00198736	1	0.0199408
chr1	58746500	58754999	35	13	1.99811	0.500472	2.91073e-05	1	0.000141889	1
chr1	58775500	58790999	47	26	1.38141	0.723898	0.0104773	1	0.0285855	1
chr1	58815500	58823999	37	18	1.55409	0.643465	0.00286578	1	0.00871184	1
chr1	58902500	58908999	30	10	2.18985	0.456652	1.28866e-05	1	6.88716e-05	1
chr1	59952000	59958999	37	11	2.46064	0.406399	1.15363e-07	1	1.03436e-06	1
chr1	59977000	59991999	22	51	0.343692	2.90958	1	4.19451e-05	1	0.000898248
chr1	60193500	60198999	9	23	0.323768	3.08863	1	0.000928874	1	0.0109719
chr1	60979000	60984499	11	24	0.372981	2.6811	1	0.00573146	1	0.0460668
chr1	61162500	61164999	6	19	0.271965	3.67694	1	0.000161327	1	0.00271063
chr1	62332500	62344499	54	17	2.3743	0.421177	2.0291e-09	1	2.91214e-08	1
chr1	62393500	62401499	38	10	2.75497	0.36298	3.46998e-09	1	4.68771e-08	1
chr1	63357000	63367999	41	22	1.41895	0.704747	0.00950659	1	0.0261219	1
chr1	63796000	63798999	5	16	0.274251	3.6463	1	0.000384783	1	0.00552749
chr1	63914000	63923999	38	19	1.51523	0.659964	0.00402445	1	0.0119192	1
chr1	64159500	64165499	8	22	0.304061	3.28882	1	0.000438466	1	0.00581137
chr1	64261000	64269999	43	8	3.79888	0.263236	5.92288e-15	1	3.87509e-13	1
chr1	64432000	64437999	34	15	1.69978	0.58831	0.000832231	1	0.00285069	1
chr1	65049000	65051999	7	20	0.296017	3.37819	1	0.000444524	1	0.00577906
chr1	65140500	65150999	40	18	1.67678	0.596382	0.000511052	1	0.00183094	1
chr1	65348000	65359499	46	26	1.35263	0.7393	0.0155892	1	0.0411632	1
chr1	66285500	66288999	4	18	0.204485	4.89033	1	2.12266e-06	1	7.43268e-05
chr1	66357000	66362499	9	23	0.323768	3.08863	1	0.000928874	1	0.0109719
chr1	66599500	66607999	33	16	1.55409	0.643465	0.00414967	1	0.0122127	1
chr1	67316000	67316499	0	11	0.0647536	15.4432	1	1.31923e-08	1	1.0378e-06
chr1	67316500	67325499	40	16	1.87405	0.533605	4.76544e-05	1	0.000220983	1
chr1	67392500	67405999	50	22	1.72301	0.58038	7.8611e-05	1	0.00034079	1
chr1	67684000	67686999	25	5	3.36719	0.296984	5.47359e-09	1	6.97867e-08	1
chr1	67699500	67718999	72	37	1.49274	0.669908	0.000378677	1	0.00139894	1
chr1	68772500	68778499	7	26	0.230235	4.34339	1	9.81226e-07	1	3.81408e-05
chr1	69805000	69811499	13	28	0.375124	2.66578	1	0.00403151	1	0.0350793
chr1	72030500	72035499	5	19	0.233113	4.28976	1	1.39704e-05	1	0.000356631
chr1	73935500	73943999	13	31	0.339957	2.94155	1	0.000577562	1	0.00736173
chr1	74562500	74566999	8	20	0.333019	3.00283	1	0.00222768	1	0.0217575
chr1	75220500	75225999	4	15	0.242826	4.11817	1	9.59692e-05	1	0.00172595
chr1	76116000	76134499	66	34	1.48748	0.672276	0.000653435	1	0.00229973	1
chr1	76353500	76353999	2	11	0.194261	5.14772	1	1.6708e-05	1	0.000416403
chr1	77267500	77272999	8	19	0.34967	2.85984	1	0.00471378	1	0.0396726
chr1	78034000	78037499	6	16	0.319959	3.1254	1	0.0026246	1	0.0243489
chr1	78645000	78648499	1	16	0.0914169	10.9389	1	6.08887e-14	1	3.35294e-11
chr1	78988500	78989999	20	3	4.07948	0.245129	1.04259e-09	1	1.60592e-08	1
chr1	81414000	81419999	8	20	0.333019	3.00283	1	0.00222768	1	0.0217575
chr1	81718000	81722999	7	23	0.259015	3.86079	1	2.48812e-05	1	0.00059051
chr1	81933000	81935499	4	19	0.194261	5.14772	1	5.37918e-07	1	2.3902e-05
chr1	82394000	82400999	11	27	0.333019	3.00283	1	0.000748298	1	0.00924994
chr1	85213500	85221999	36	10	2.61369	0.382601	3.18096e-08	1	3.27266e-07	1
chr1	85271000	85285499	55	17	2.41747	0.413656	7.84274e-10	1	1.26094e-08	1
chr1	85347500	85352999	7	23	0.259015	3.86079	1	2.48812e-05	1	0.00059051
chr1	85582500	85584999	6	17	0.302184	3.30925	1	0.00108823	1	0.0118636
chr1	85847500	85863499	48	15	2.3797	0.420222	1.09062e-08	1	1.29387e-07	1
chr1	86837500	86852499	52	28	1.42011	0.704169	0.00476929	1	0.0139001	1
chr1	87403500	87412999	41	11	2.71965	0.367694	1.64174e-09	1	2.39182e-08	1
chr1	87457000	87457499	0	13	0.0555031	18.017	1	1.18351e-10	1	1.77167e-08
chr1	87647000	87649499	3	15	0.194261	5.14772	1	3.15798e-06	1	0.000104191
chr1	87990500	87997499	13	28	0.375124	2.66578	1	0.00403151	1	0.0350793
chr1	88316000	88325499	9	35	0.215845	4.63295	1	7.19166e-09	1	5.89818e-07
chr1	89163500	89168499	8	22	0.304061	3.28882	1	0.000438466	1	0.00581137
chr1	89229000	89234499	10	27	0.305267	3.27582	1	0.000174179	1	0.00284292
chr1	89542500	89548999	10	27	0.305267	3.27582	1	0.000174179	1	0.00284292
chr1	90546000	90548999	7	24	0.248654	4.02165	1	8.78901e-06	1	0.000246989
chr1	91157500	91167999	40	18	1.67678	0.596382	0.000511052	1	0.00183094	1
chr1	91599500	91616499	58	34	1.30987	0.763433	0.0160689	1	0.0422128	1
chr1	91821500	91833499	48	18	2.00395	0.499013	1.97964e-06	1	1.31058e-05	1
chr1	91933500	91950999	65	27	1.8316	0.54597	1.53118e-06	1	1.04463e-05	1
chr1	92066500	92073499	10	29	0.284916	3.50981	1	3.16762e-05	1	0.000682765
chr1	92127500	92138999	41	20	1.55409	0.643465	0.00198242	1	0.00622573	1
chr1	92418000	92426499	35	16	1.6455	0.607717	0.00131039	1	0.00430615	1
chr1	92497000	92510499	46	26	1.35263	0.7393	0.0155892	1	0.0411632	1
chr1	92918000	92929499	46	15	2.28257	0.438104	7.05954e-08	1	6.68193e-07	1
chr1	92990000	92999499	41	23	1.35983	0.735388	0.0183101	1	0.0477238	1
chr1	93412500	93425499	52	16	2.42255	0.412789	1.80728e-09	1	2.61161e-08	1
chr1	94019500	94022499	25	5	3.36719	0.296984	5.47359e-09	1	6.97867e-08	1
chr1	94031500	94042499	45	18	1.88126	0.531558	1.85524e-05	1	9.50869e-05	1
chr1	94326500	94333499	30	15	1.50552	0.664222	0.00859744	1	0.0238491	1
chr1	94609000	94638999	110	47	1.79691	0.55651	3.80998e-09	1	5.04681e-08	1
chr1	94880000	94894999	53	28	1.44691	0.691129	0.00308866	1	0.0093519	1
chr1	95163500	95171499	39	13	2.22012	0.450425	9.67581e-07	1	6.85082e-06	1
chr1	95351500	95353499	4	13	0.277516	3.6034	1	0.000917656	1	0.0109938
chr1	96714500	96720999	3	23	0.129507	7.72158	1	4.82067e-12	1	1.26696e-09
chr1	97544000	97551999	10	30	0.275725	3.6268	1	1.28866e-05	1	0.000345957
chr1	98914500	98920999	6	26	0.201456	4.96387	1	5.19655e-08	1	3.30635e-06
chr1	99028500	99032499	4	18	0.204485	4.89033	1	2.12266e-06	1	7.43268e-05
chr1	99294000	99296999	7	18	0.327176	3.05646	1	0.00245111	1	0.0233674
chr1	99570500	99578999	9	28	0.267946	3.73209	1	1.20305e-05	1	0.00032562
chr1	99686500	99691999	5	25	0.179318	5.57669	1	5.47359e-09	1	4.94504e-07
chr1	100218500	100220999	5	18	0.245382	4.07528	1	4.43333e-05	1	0.000938097
chr1	100253000	100256499	8	21	0.317881	3.14583	1	0.00100885	1	0.0116112
chr1	102412000	102417499	9	21	0.353202	2.83124	1	0.00408927	1	0.035211
chr1	102705000	102712499	11	24	0.372981	2.6811	1	0.00573146	1	0.0460668
chr1	106875000	106877999	6	17	0.302184	3.30925	1	0.00108823	1	0.0118636
chr1	106981000	106987999	10	24	0.341899	2.92484	1	0.00174972	1	0.0179696
chr1	107600500	107603499	5	15	0.291391	3.43181	1	0.00104737	1	0.0118482
chr1	109163500	109176499	57	15	2.81678	0.355015	9.61959e-13	1	3.4123e-11	1
chr1	109228000	109235999	36	13	2.05362	0.486946	1.29037e-05	1	6.84253e-05	1
chr1	109259000	109307999	197	104	1.46528	0.682462	1.31105e-07	1	1.16265e-06	1
chr1	109359500	109368499	37	15	1.84548	0.541865	0.000109641	1	0.000460297	1
chr1	109534000	109544499	50	22	1.72301	0.58038	7.8611e-05	1	0.00034079	1
chr1	109655500	109665499	46	16	2.1483	0.465485	4.22931e-07	1	3.23624e-06	1
chr1	109758000	109765499	41	16	1.91975	0.5209	2.28956e-05	1	0.000114579	1
chr1	109799500	109808499	42	12	2.57022	0.389072	6.49684e-09	1	8.1375e-08	1
chr1	109924000	109936499	58	30	1.47889	0.676183	0.00135984	1	0.0044437	1
chr1	110030000	110050999	87	46	1.45489	0.687337	0.000278254	1	0.0010617	1
chr1	110061000	110072499	53	21	1.90729	0.524304	3.18034e-06	1	1.98421e-05	1
chr1	110190000	110201499	51	14	2.69375	0.37123	5.52773e-11	1	1.23047e-09	1
chr1	110226000	110231999	29	7	2.91391	0.343181	2.82186e-08	1	2.97262e-07	1
chr1	110413000	110420499	41	18	1.71768	0.582182	0.000274911	1	0.00105189	1
chr1	110424000	110456499	135	71	1.46775	0.681315	7.78159e-06	1	4.41921e-05	1
chr1	110474500	110499499	94	46	1.57062	0.636691	1.12712e-05	1	6.17509e-05	1
chr1	110544500	110554499	42	19	1.67064	0.598572	0.000432875	1	0.00158173	1
chr1	111279500	111289499	44	14	2.33113	0.428976	6.53899e-08	1	6.26616e-07	1
chr1	111413500	111426999	54	24	1.7095	0.584968	5.72576e-05	1	0.000259683	1
chr1	111508000	111519999	59	28	1.60768	0.622016	0.000161651	1	0.000651962	1
chr1	111721500	111726499	32	8	2.84916	0.350981	1.45136e-08	1	1.63383e-07	1
chr1	111897000	111916499	88	44	1.53682	0.650695	4.2348e-05	1	0.000199029	1
chr1	111957000	111960999	10	23	0.356145	2.80785	1	0.00351797	1	0.0310429
chr1	112187500	112197499	13	30	0.350923	2.84963	1	0.00113685	1	0.0122322
chr1	112757000	112766999	48	21	1.73069	0.577805	9.18757e-05	1	0.000392882	1
chr1	112797500	112806499	44	22	1.5203	0.657764	0.0022966	1	0.00714161	1
chr1	113192000	113198499	35	19	1.39868	0.714961	0.0168678	1	0.0442009	1
chr1	113861500	113877999	55	29	1.45048	0.689426	0.00256667	1	0.00788338	1
chr1	113998500	114005499	36	17	1.59726	0.626074	0.00197481	1	0.00621491	1
chr1	114017000	114024499	37	7	3.69096	0.270932	5.74192e-13	1	2.15583e-11	1
chr1	114215000	114218499	8	20	0.333019	3.00283	1	0.00222768	1	0.0217575
chr1	115469500	115478999	45	13	2.55314	0.391674	2.90424e-09	1	3.96278e-08	1
chr1	115776000	115780499	4	19	0.194261	5.14772	1	5.37918e-07	1	2.3902e-05
chr1	116081000	116086499	27	6	3.10817	0.321732	1.41527e-08	1	1.60926e-07	1
chr1	116116500	116134499	69	25	2.09204	0.478002	5.39269e-09	1	6.89454e-08	1
chr1	116426000	116434499	36	10	2.61369	0.382601	3.18096e-08	1	3.27266e-07	1
chr1	116788000	116803499	59	32	1.41281	0.707811	0.0034779	1	0.010391	1
chr1	116840500	116849499	35	17	1.55409	0.643465	0.00344776	1	0.0103236	1
chr1	116914000	116920999	30	10	2.18985	0.456652	1.28866e-05	1	6.88716e-05	1
chr1	117198000	117199999	4	16	0.228542	4.37556	1	2.84248e-05	1	0.000649934
chr1	117579500	117582499	23	5	3.10817	0.321732	8.80438e-08	1	8.07245e-07	1
chr1	118261000	118262499	4	14	0.259015	3.86079	1	0.000305909	1	0.00456162
chr1	118920500	118930999	33	14	1.7613	0.567763	0.000502134	1	0.00180542	1
chr1	119034000	119037499	1	17	0.0863382	11.5824	1	4.33594e-15	1	4.1784e-12
chr1	119064000	119077499	16	37	0.347625	2.87667	1	0.000374114	1	0.00546589
chr1	119405500	119411999	6	20	0.259015	3.86079	1	5.7919e-05	1	0.00117094
chr1	119473500	119484999	42	15	2.0883	0.478857	2.30926e-06	1	1.48213e-05	1
chr1	119580500	119587499	33	7	3.30244	0.302807	1.59784e-10	1	3.11591e-09	1
chr1	124951500	124961499	13	35	0.302184	3.30925	1	2.91073e-05	1	0.00064637
chr1	145728000	145735499	10	32	0.259015	3.86079	1	1.94935e-06	1	7.13929e-05
chr1	145871000	145882999	60	27	1.69284	0.590722	3.52469e-05	1	0.0001677	1
chr1	147567000	147570999	9	21	0.353202	2.83124	1	0.00408927	1	0.035211
chr1	147740000	147763499	92	33	2.12544	0.47049	1.44985e-11	1	3.71343e-10	1
chr1	148345500	148359999	56	18	2.33113	0.428976	2.21529e-09	1	3.15974e-08	1
chr1	149899500	149907499	38	11	2.52539	0.395978	4.13159e-08	1	4.16364e-07	1
chr1	149927000	149943999	69	31	1.69978	0.58831	1.02138e-05	1	5.6405e-05	1
chr1	150166000	150176499	38	19	1.51523	0.659964	0.00402445	1	0.0119192	1
chr1	150253000	150271499	81	44	1.41595	0.706242	0.00090329	1	0.00307836	1
chr1	150388000	150406499	48	24	1.52301	0.656597	0.00158502	1	0.0051003	1
chr1	150549000	150556499	34	16	1.5998	0.62508	0.00236206	1	0.00732498	1
chr1	150943500	150952499	38	14	2.02031	0.494973	1.23286e-05	1	6.62722e-05	1
chr1	151287000	151302499	62	37	1.28826	0.776243	0.0187564	1	0.0487687	1
chr1	151367000	151381999	56	14	2.95277	0.338666	2.0026e-13	1	8.53753e-12	1
chr1	151713500	151718499	30	10	2.18985	0.456652	1.28866e-05	1	6.88716e-05	1
chr1	151944500	151952499	35	14	1.8649	0.53622	0.000123076	1	0.000510536	1
chr1	151998500	152006999	43	17	1.89944	0.526471	2.06908e-05	1	0.000104919	1
chr1	152010500	152021999	43	16	2.01117	0.497223	4.94481e-06	1	2.97551e-05	1
chr1	152071000	152079499	41	16	1.91975	0.5209	2.28956e-05	1	0.000114579	1
chr1	152618500	152629999	46	21	1.66005	0.602392	0.000309468	1	0.00117334	1
chr1	152900500	152910499	45	15	2.234	0.447628	1.7424e-07	1	1.48374e-06	1
chr1	153216000	153224499	40	21	1.44813	0.690547	0.00730669	1	0.0205208	1
chr1	153435500	153441999	33	8	2.9355	0.340658	4.34318e-09	1	5.67669e-08	1
chr1	153452500	153461499	40	9	3.18588	0.313885	1.58422e-11	1	3.9891e-10	1
chr1	153598500	153617999	77	26	2.24479	0.445475	3.66486e-11	1	8.45496e-10	1
chr1	153737000	153775499	150	77	1.50428	0.664771	7.59396e-07	1	5.57211e-06	1
chr1	153949500	153968999	69	24	2.17572	0.459618	1.08655e-09	1	1.65599e-08	1
chr1	154013000	154019999	32	8	2.84916	0.350981	1.45136e-08	1	1.63383e-07	1
chr1	154205500	154207499	4	16	0.228542	4.37556	1	2.84248e-05	1	0.000649934
chr1	154322000	154330999	40	18	1.67678	0.596382	0.000511052	1	0.00183094	1
chr1	154418500	154430499	46	18	1.92216	0.520248	8.97677e-06	1	5.03308e-05	1
chr1	154794000	154808499	74	26	2.15845	0.463295	4.59351e-10	1	7.82605e-09	1
chr1	154863500	154872999	45	22	1.55409	0.643465	0.00137354	1	0.00448182	1
chr1	154909500	154917999	36	14	1.91671	0.521728	5.86063e-05	1	0.000264891	1
chr1	154965500	154976999	52	25	1.58397	0.631324	0.000470435	1	0.00169884	1
chr1	154987500	155001499	61	32	1.4599	0.684978	0.00147737	1	0.00479155	1
chr1	155004500	155033499	121	54	1.72362	0.580173	7.91078e-09	1	9.73971e-08	1
chr1	155133500	155140999	39	19	1.55409	0.643465	0.00238303	1	0.00736091	1
chr1	155174500	155179999	35	12	2.15181	0.464724	5.57653e-06	1	3.2693e-05	1
chr1	155226500	155232999	33	6	3.77421	0.264956	2.92222e-12	1	9.01136e-11	1
chr1	155261500	155279999	67	33	1.55409	0.643465	0.000186942	1	0.000741103	1
chr1	155285000	155298999	60	33	1.39411	0.717305	0.0043529	1	0.0127751	1
chr1	155874000	155885499	46	21	1.66005	0.602392	0.000309468	1	0.00117334	1
chr1	156024000	156031999	39	13	2.22012	0.450425	9.67581e-07	1	6.85082e-06	1
chr1	156053000	156065999	65	19	2.56424	0.389979	2.94051e-12	1	8.99579e-11	1
chr1	156195000	156204499	49	24	1.55409	0.643465	0.000953087	1	0.00322525	1
chr1	156231500	156243999	51	17	2.24479	0.445475	3.15953e-08	1	3.27098e-07	1
chr1	156266500	156286999	82	38	1.65371	0.604702	5.63152e-06	1	3.27209e-05	1
chr1	156373000	156374999	5	16	0.274251	3.6463	1	0.000384783	1	0.00552749
chr1	156380500	156418499	156	83	1.45233	0.688548	3.27829e-06	1	2.04147e-05	1
chr1	156453000	156465999	52	13	2.94166	0.339944	1.2829e-12	1	4.44842e-11	1
chr1	156471500	156475999	10	23	0.356145	2.80785	1	0.00351797	1	0.0310429
chr1	156490500	156516499	96	49	1.50746	0.663366	4.38156e-05	1	0.000205073	1
chr1	156526500	156542999	82	38	1.65371	0.604702	5.63152e-06	1	3.27209e-05	1
chr1	156553500	156555999	2	15	0.145696	6.86362	1	1.59031e-08	1	1.17699e-06
chr1	156570500	156577999	40	15	1.99117	0.502216	1.15925e-05	1	6.31146e-05	1
chr1	156638500	156653999	66	29	1.7354	0.576237	7.72497e-06	1	4.39137e-05	1
chr1	156683000	156700999	72	41	1.35058	0.740425	0.00478036	1	0.0139174	1
chr1	156732000	156745499	57	30	1.45382	0.687841	0.00213402	1	0.00667283	1
chr1	156748500	156751499	28	5	3.75571	0.266261	6.45634e-11	1	1.39228e-09	1
chr1	156797500	156817999	79	47	1.29507	0.772158	0.00934697	1	0.0257338	1
chr1	156852000	156858999	28	11	1.87786	0.532522	0.000355277	1	0.00132423	1
chr1	156862000	156871999	40	15	1.99117	0.502216	1.15925e-05	1	6.31146e-05	1
chr1	156933500	156948999	62	36	1.32307	0.755816	0.0113715	1	0.0308071	1
chr1	157113500	157119499	30	11	2.00736	0.498166	7.28955e-05	1	0.000320762	1
chr1	157165500	157174999	43	24	1.3676	0.73121	0.0151921	1	0.0401949	1
chr1	157347500	157357499	42	18	1.75857	0.568643	0.000144669	1	0.000589796	1
chr1	157405000	157424999	78	38	1.57401	0.635319	4.63845e-05	1	0.000216461	1
chr1	157636000	157642999	28	9	2.25343	0.443769	1.20305e-05	1	6.50478e-05	1
chr1	157880000	157901499	65	33	1.50838	0.662964	0.000493111	1	0.00177698	1
chr1	158075500	158089499	55	26	1.61165	0.620484	0.000229722	1	0.000894974	1
chr1	158180000	158185999	32	13	1.8316	0.54597	0.000285158	1	0.00108616	1
chr1	159122500	159133499	38	21	1.37749	0.72596	0.0176998	1	0.0462321	1
chr1	159239000	159242499	8	23	0.291391	3.43181	1	0.000183148	1	0.00285626
chr1	159951000	159954999	8	20	0.333019	3.00283	1	0.00222768	1	0.0217575
chr1	160098000	160103499	33	12	2.03227	0.492061	3.06212e-05	1	0.000148176	1
chr1	160200500	160208499	37	8	3.28085	0.304799	2.64544e-11	1	6.30111e-10	1
chr1	160387500	160388999	1	15	0.0971304	10.2954	1	8.07937e-13	1	2.45868e-10
chr1	160395500	160418999	89	41	1.66509	0.600567	1.95791e-06	1	1.29935e-05	1
chr1	160487500	160501499	46	18	1.92216	0.520248	8.97677e-06	1	5.03308e-05	1
chr1	160625500	160637499	18	39	0.369096	2.70932	1	0.000929006	1	0.0108515
chr1	160644500	160654999	41	7	4.07948	0.245129	1.37029e-15	1	1.06708e-13	1
chr1	160861000	160867999	33	16	1.55409	0.643465	0.00414967	1	0.0122127	1
chr1	160949500	160955499	33	7	3.30244	0.302807	1.59784e-10	1	3.11591e-09	1
chr1	160995500	161001499	34	12	2.09204	0.478002	1.32439e-05	1	6.97815e-05	1
chr1	161078500	161103499	96	40	1.83837	0.54396	1.01338e-08	1	1.21438e-07	1
chr1	161109500	161118499	47	19	1.8649	0.53622	1.65245e-05	1	8.53268e-05	1
chr1	161147000	161159499	46	14	2.43474	0.410722	9.57387e-09	1	1.15446e-07	1
chr1	161165500	161178499	51	26	1.49653	0.668213	0.00178372	1	0.00566556	1
chr1	161259000	161269499	44	20	1.66509	0.600567	0.000366198	1	0.00136088	1
chr1	162026000	162029499	5	19	0.233113	4.28976	1	1.39704e-05	1	0.000356631
chr1	163425500	163429999	8	23	0.291391	3.43181	1	0.000183148	1	0.00285626
chr1	163563000	163565999	5	20	0.222012	4.50425	1	4.2017e-06	1	0.000131855
chr1	163721000	163723499	4	15	0.242826	4.11817	1	9.59692e-05	1	0.00172595
chr1	164051000	164059499	32	17	1.42458	0.701961	0.0157749	1	0.0415989	1
chr1	164400000	164404999	7	20	0.296017	3.37819	1	0.000444524	1	0.00577906
chr1	164627000	164641499	51	18	2.12665	0.470224	1.77462e-07	1	1.50177e-06	1
chr1	165198500	165207999	38	16	1.78263	0.560969	0.000192723	1	0.000760825	1
chr1	165493000	165500999	35	15	1.74835	0.571969	0.000434325	1	0.00158178	1
chr1	165894500	165899999	29	6	3.33019	0.300283	9.48552e-10	1	1.49391e-08	1
chr1	166072500	166089499	62	32	1.48345	0.674106	0.00094183	1	0.00319206	1
chr1	166120000	166135999	49	28	1.33973	0.746419	0.0158572	1	0.0417514	1
chr1	166231500	166238499	31	1	12.4327	0.0804331	3.49885e-33	1	1.15602e-29	1
chr1	166433000	166439499	8	23	0.291391	3.43181	1	0.000183148	1	0.00285626
chr1	166764000	166768499	6	19	0.271965	3.67694	1	0.000161327	1	0.00271063
chr1	167115500	167124499	36	14	1.91671	0.521728	5.86063e-05	1	0.000264891	1
chr1	167428000	167445499	78	40	1.49723	0.6679	0.000220092	1	0.000862031	1
chr1	167682500	167684499	2	17	0.129507	7.72158	1	3.3812e-10	1	4.20433e-08
chr1	167843000	167855999	47	18	1.96306	0.509409	4.25727e-06	1	2.59966e-05	1
chr1	168104500	168113499	35	15	1.74835	0.571969	0.000434325	1	0.00158178	1
chr1	168419500	168431499	50	29	1.32097	0.757017	0.0191348	1	0.0496076	1
chr1	168610000	168624999	50	28	1.36652	0.731783	0.0108084	1	0.0293693	1
chr1	168626000	168631999	6	21	0.247241	4.04463	1	1.98963e-05	1	0.000485916
chr1	168883000	168888999	26	9	2.09802	0.47664	7.59639e-05	1	0.000330305	1
chr1	169010500	169018499	42	15	2.0883	0.478857	2.30926e-06	1	1.48213e-05	1
chr1	169888000	169898999	39	17	1.72676	0.579118	0.000321152	1	0.00120833	1
chr1	169902500	169917999	50	20	1.88711	0.529912	7.25493e-06	1	4.15327e-05	1
chr1	170146000	170156999	43	18	1.79947	0.555719	7.45063e-05	1	0.000326206	1
chr1	170227500	170232999	5	22	0.202707	4.93323	1	3.32973e-07	1	1.57808e-05
chr1	170975000	170980499	7	25	0.23909	4.18252	1	2.99035e-06	1	0.000101038
chr1	171290500	171297499	14	29	0.388522	2.57386	1	0.00601875	1	0.0474201
chr1	173077000	173088999	44	24	1.39868	0.714961	0.0100475	1	0.0274924	1
chr1	173852500	173863999	43	16	2.01117	0.497223	4.94481e-06	1	2.97551e-05	1
chr1	174104500	174106999	7	18	0.327176	3.05646	1	0.00245111	1	0.0233674
chr1	174123500	174138999	49	27	1.38758	0.72068	0.00870806	1	0.0241227	1
chr1	174725000	174726999	1	16	0.0914169	10.9389	1	6.08887e-14	1	3.35294e-11
chr1	175073500	175090999	69	36	1.47008	0.680234	0.000711656	1	0.00247525	1
chr1	175561500	175565999	6	21	0.247241	4.04463	1	1.98963e-05	1	0.000485916
chr1	175570500	175575999	26	12	1.61386	0.619633	0.00481026	1	0.0139966	1
chr1	175747000	175762999	56	21	2.01325	0.49671	3.41663e-07	1	2.73189e-06	1
chr1	175870500	175879999	39	13	2.22012	0.450425	9.67581e-07	1	6.85082e-06	1
chr1	175889000	175903999	50	24	1.58517	0.630848	0.000562723	1	0.00199918	1
chr1	177613500	177623499	38	19	1.51523	0.659964	0.00402445	1	0.0119192	1
chr1	177910000	177926499	66	36	1.40708	0.710692	0.00253145	1	0.00778813	1
chr1	178538500	178552999	57	31	1.40839	0.71003	0.00417514	1	0.0122674	1
chr1	179770500	179784999	55	31	1.35983	0.735388	0.00923081	1	0.0254291	1
chr1	179807500	179820999	68	32	1.62473	0.615488	4.68549e-05	1	0.000218458	1
chr1	180106000	180124499	74	42	1.35531	0.737839	0.00401871	1	0.0119213	1
chr1	180149500	180154499	30	11	2.00736	0.498166	7.28955e-05	1	0.000320762	1
chr1	180236500	180244499	18	38	0.37856	2.64159	1	0.00165071	1	0.0171047
chr1	180362000	180375499	15	41	0.296017	3.37819	1	5.23245e-06	1	0.000158398
chr1	180589000	180603499	53	25	1.61386	0.619633	0.000273811	1	0.00105072	1
chr1	180916000	180927999	66	18	2.7401	0.36495	1.00099e-13	1	4.81807e-12	1
chr1	180945500	180957499	49	18	2.04485	0.489033	9.02895e-07	1	6.49422e-06	1
chr1	181022000	181032999	45	20	1.7021	0.587511	0.000200097	1	0.000786581	1
chr1	181049000	181055499	8	25	0.268977	3.7178	1	2.85175e-05	1	0.000638174
chr1	181135000	181155499	85	43	1.51877	0.658429	8.10158e-05	1	0.000349675	1
chr1	181228500	181233999	8	22	0.304061	3.28882	1	0.000438466	1	0.00581137
chr1	181450000	181458499	46	12	2.80931	0.355959	8.27446e-11	1	1.74371e-09	1
chr1	181718000	181735999	69	31	1.69978	0.58831	1.02138e-05	1	5.6405e-05	1
chr1	181995000	182004999	42	18	1.75857	0.568643	0.000144669	1	0.000589796	1
chr1	182588500	182593499	34	5	4.53275	0.220616	3.75471e-15	1	2.58449e-13	1
chr1	183178500	183183999	7	22	0.270276	3.69992	1	6.77532e-05	1	0.00132572
chr1	183586000	183589499	6	17	0.302184	3.30925	1	0.00108823	1	0.0118636
chr1	183883500	183884999	1	15	0.0971304	10.2954	1	8.07937e-13	1	2.45868e-10
chr1	184516000	184521499	6	24	0.217572	4.59618	1	6.29395e-07	1	2.6134e-05
chr1	184661000	184669499	33	16	1.55409	0.643465	0.00414967	1	0.0122127	1
chr1	186845500	186851499	9	23	0.323768	3.08863	1	0.000928874	1	0.0109719
chr1	186896000	186904999	37	8	3.28085	0.304799	2.64544e-11	1	6.30111e-10	1
chr1	187608000	187614499	10	27	0.305267	3.27582	1	0.000174179	1	0.00284292
chr1	187798000	187800999	6	19	0.271965	3.67694	1	0.000161327	1	0.00271063
chr1	190504000	190507499	7	17	0.345353	2.89559	1	0.00536897	1	0.0438775
chr1	191973500	191984999	39	18	1.63588	0.611291	0.000929006	1	0.00315415	1
chr1	192974000	192998999	73	40	1.40247	0.713028	0.00184091	1	0.00582482	1
chr1	193110000	193112999	4	17	0.215845	4.63295	1	7.97187e-06	1	0.000229463
chr1	193305000	193314499	34	16	1.5998	0.62508	0.00236206	1	0.00732498	1
chr1	193356000	193365999	18	37	0.388522	2.57386	1	0.00286578	1	0.0260329
chr1	194432000	194435999	6	18	0.286279	3.49309	1	0.00042917	1	0.00582845
chr1	196687500	196691499	2	19	0.116557	8.57953	1	5.80985e-12	1	1.45265e-09
chr1	197367500	197376999	41	17	1.8131	0.551541	8.52106e-05	1	0.000366481	1
chr1	197916500	197924999	34	17	1.51092	0.661849	0.0058715	1	0.0168314	1
chr1	198370000	198372499	3	15	0.194261	5.14772	1	3.15798e-06	1	0.000104191
chr1	198914500	198917499	2	17	0.129507	7.72158	1	3.3812e-10	1	4.20433e-08
chr1	200025500	200035999	36	19	1.43753	0.695637	0.0107111	1	0.029158	1
chr1	200412500	200419499	7	22	0.270276	3.69992	1	6.77532e-05	1	0.00132572
chr1	200422500	200436999	46	17	2.02895	0.492866	2.11179e-06	1	1.38774e-05	1
chr1	200520500	200527999	38	15	1.89404	0.527971	5.30912e-05	1	0.000243606	1
chr1	200966500	200974999	35	19	1.39868	0.714961	0.0168678	1	0.0442009	1
chr1	201049500	201059499	59	19	2.33113	0.428976	9.51918e-10	1	1.49261e-08	1
chr1	201070000	201087499	77	46	1.28956	0.775457	0.0110022	1	0.0298749	1
chr1	201230500	201234999	4	20	0.18501	5.4051	1	1.30028e-07	1	7.10105e-06
chr1	201299500	201310499	57	26	1.6692	0.599088	7.45839e-05	1	0.000325651	1
chr1	201346500	201355499	40	21	1.44813	0.690547	0.00730669	1	0.0205208	1
chr1	201375000	201400999	109	62	1.35674	0.737059	0.000777996	1	0.00269444	1
chr1	201485500	201499999	68	36	1.44908	0.690092	0.00110089	1	0.00367806	1
chr1	201529500	201538999	41	16	1.91975	0.5209	2.28956e-05	1	0.000114579	1
chr1	201650500	201663999	54	27	1.52634	0.655164	0.000912355	1	0.00310605	1
chr1	201668000	201674999	35	8	3.10817	0.321732	3.57615e-10	1	6.26823e-09	1
chr1	201716000	201721999	35	14	1.8649	0.53622	0.000123076	1	0.000510536	1
chr1	201902500	201923499	94	43	1.67771	0.596051	8.04716e-07	1	5.8702e-06	1
chr1	202007000	202017999	49	27	1.38758	0.72068	0.00870806	1	0.0241227	1
chr1	202132000	202148999	86	36	1.8271	0.547315	6.37075e-08	1	6.12906e-07	1
chr1	202200500	202231499	121	53	1.75554	0.569624	2.86319e-09	1	3.92182e-08	1
chr1	202235000	202242999	49	15	2.42826	0.411817	4.16171e-09	1	5.48444e-08	1
chr1	202248500	202259499	48	18	2.00395	0.499013	1.97964e-06	1	1.31058e-05	1
chr1	202264500	202268999	6	17	0.302184	3.30925	1	0.00108823	1	0.0118636
chr1	202596500	202608499	53	28	1.44691	0.691129	0.00308866	1	0.0093519	1
chr1	202627000	202638499	48	26	1.41019	0.709124	0.00691384	1	0.019523	1
chr1	202654000	202663999	49	23	1.61884	0.617726	0.00038881	1	0.00143294	1
chr1	202675500	202693499	70	42	1.28303	0.779408	0.0154668	1	0.0408678	1
chr1	202806500	202819499	61	25	1.85295	0.53968	1.9852e-06	1	1.31107e-05	1
chr1	202981500	202990499	39	9	3.10817	0.321732	5.65882e-11	1	1.23586e-09	1
chr1	203026000	203031999	34	15	1.69978	0.58831	0.000832231	1	0.00285069	1
chr1	203037500	203045999	44	20	1.66509	0.600567	0.000366198	1	0.00136088	1
chr1	203065500	203076999	53	26	1.55409	0.643465	0.000662252	1	0.00231788	1
chr1	203152000	203164999	45	15	2.234	0.447628	1.7424e-07	1	1.48374e-06	1
chr1	203269000	203273499	29	5	3.88522	0.257386	1.37306e-11	1	3.54025e-10	1
chr1	203277500	203286999	41	15	2.03974	0.490259	5.23245e-06	1	3.11055e-05	1
chr1	203351000	203353999	7	19	0.310817	3.21732	1	0.00106766	1	0.0118716
chr1	203535500	203536999	2	14	0.155409	6.43465	1	9.99376e-08	1	5.76398e-06
chr1	203664500	203675499	46	12	2.80931	0.355959	8.27446e-11	1	1.74371e-09	1
chr1	204090000	204103499	59	26	1.72676	0.579118	2.27048e-05	1	0.000114243	1
chr1	204142000	204162999	97	50	1.49314	0.669728	5.73496e-05	1	0.00025982	1
chr1	204367500	204380499	54	30	1.37863	0.72536	0.00750477	1	0.021035	1
chr1	204441500	204452499	53	27	1.49858	0.667297	0.00148227	1	0.00480206	1
chr1	204549000	204556999	32	17	1.42458	0.701961	0.0157749	1	0.0415989	1
chr1	204622500	204626499	28	6	3.21918	0.310638	3.72503e-09	1	4.95557e-08	1
chr1	204698000	204711499	57	31	1.40839	0.71003	0.00417514	1	0.0122674	1
chr1	204842500	204861999	71	35	1.55409	0.643465	0.000130544	1	0.000538426	1
chr1	204903000	204905999	6	18	0.286279	3.49309	1	0.00042917	1	0.00582845
chr1	204974000	204992999	81	50	1.24936	0.800407	0.0191048	1	0.0495604	1
chr1	204996000	205008499	56	25	1.70352	0.58702	4.87627e-05	1	0.000224658	1
chr1	205022000	205032999	46	17	2.02895	0.492866	2.11179e-06	1	1.38774e-05	1
chr1	205052000	205066999	60	26	1.75554	0.569624	1.22349e-05	1	6.60061e-05	1
chr1	205257000	205262999	37	15	1.84548	0.541865	0.000109641	1	0.000460297	1
chr1	205292000	205310499	78	35	1.70518	0.586449	2.9808e-06	1	1.86804e-05	1
chr1	205319500	205343999	100	52	1.48078	0.675319	6.22378e-05	1	0.00028021	1
chr1	205349000	205360499	45	15	2.234	0.447628	1.7424e-07	1	1.48374e-06	1
chr1	205422500	205429999	38	20	1.44308	0.692962	0.00884198	1	0.0244322	1
chr1	205513000	205545499	131	56	1.79947	0.555719	1.61982e-10	1	3.13238e-09	1
chr1	205619500	205626999	32	8	2.84916	0.350981	1.45136e-08	1	1.63383e-07	1
chr1	205654500	205666999	51	25	1.55409	0.643465	0.00079434	1	0.00273711	1
chr1	205804000	205820499	67	27	1.88711	0.529912	3.94283e-07	1	3.08178e-06	1
chr1	205933500	205944499	67	31	1.65122	0.605614	3.20872e-05	1	0.000153504	1
chr1	206452500	206495499	170	67	1.95404	0.511761	5.6475e-16	1	4.87371e-14	1
chr1	206506000	206522999	78	44	1.36414	0.733061	0.00283974	1	0.0086583	1
chr1	206537500	206545499	36	15	1.79691	0.55651	0.00022096	1	0.000863235	1
chr1	206560500	206568499	38	15	1.89404	0.527971	5.30912e-05	1	0.000243606	1
chr1	206578000	206603499	94	50	1.44743	0.690878	0.000207222	1	0.000813277	1
chr1	206694000	206706999	56	23	1.84548	0.541865	5.05114e-06	1	3.02964e-05	1
chr1	206729500	206738499	44	14	2.33113	0.428976	6.53899e-08	1	6.26616e-07	1
chr1	206941500	206952499	45	19	1.7872	0.559534	6.48644e-05	1	0.000289359	1
chr1	207638500	207641499	6	16	0.319959	3.1254	1	0.0026246	1	0.0243489
chr1	208058000	208064499	35	4	5.59471	0.17874	7.52896e-19	1	1.34984e-16	1
chr1	208160000	208170499	41	19	1.63179	0.612823	0.000781252	1	0.00270208	1
chr1	208467500	208476999	12	32	0.306108	3.26682	1	6.88793e-05	1	0.00132975
chr1	208531000	208545499	58	12	3.52658	0.283561	2.5997e-17	1	3.01382e-15	1
chr1	208593500	208606999	43	16	2.01117	0.497223	4.94481e-06	1	2.97551e-05	1
chr1	208733500	208742499	39	16	1.82834	0.546945	9.69537e-05	1	0.000411553	1
chr1	209083500	209089999	10	23	0.356145	2.80785	1	0.00351797	1	0.0310429
chr1	209220000	209239499	71	39	1.39868	0.714961	0.00220045	1	0.00686246	1
chr1	209340500	209347999	38	12	2.33113	0.428976	3.56652e-07	1	2.8341e-06	1
chr1	209378500	209382999	29	8	2.59015	0.386079	4.53527e-07	1	3.45096e-06	1
chr1	209810000	209813499	8	22	0.304061	3.28882	1	0.000438466	1	0.00581137
chr1	209848000	209851499	26	4	4.19604	0.23832	1.06778e-11	1	2.87659e-10	1
chr1	210511500	210520499	35	18	1.47229	0.679213	0.00804268	1	0.0224123	1
chr1	210632000	210636499	9	23	0.323768	3.08863	1	0.000928874	1	0.0109719
chr1	210645000	210655999	47	25	1.43454	0.697087	0.00540154	1	0.0155983	1
chr1	210711000	210717499	33	13	1.88711	0.529912	0.000136918	1	0.00056146	1
chr1	210818500	210831999	52	24	1.64733	0.607042	0.000185893	1	0.000738211	1
chr1	210939000	210945999	9	23	0.323768	3.08863	1	0.000928874	1	0.0109719
chr1	211124000	211129499	7	21	0.282561	3.53906	1	0.000177212	1	0.00285017
chr1	211223500	211229999	46	19	1.82605	0.547629	3.3067e-05	1	0.000157816	1
chr1	211476500	211486499	44	22	1.5203	0.657764	0.0022966	1	0.00714161	1
chr1	211653000	211656999	24	7	2.42826	0.411817	8.78901e-06	1	4.94279e-05	1
chr1	212232000	212235999	6	20	0.259015	3.86079	1	5.7919e-05	1	0.00117094
chr1	212626000	212631999	29	14	1.55409	0.643465	0.00601875	1	0.0172205	1
chr1	212915500	212922499	38	14	2.02031	0.494973	1.23286e-05	1	6.62722e-05	1
chr1	212975500	212982499	43	10	3.10817	0.321732	8.945e-12	1	2.45993e-10	1
chr1	213391000	213397999	35	13	1.99811	0.500472	2.91073e-05	1	0.000141889	1
chr1	213619000	213627999	44	17	1.94261	0.514772	9.8727e-06	1	5.48291e-05	1
chr1	213854000	213868499	45	24	1.42976	0.699418	0.0065165	1	0.0185311	1
chr1	214435500	214442999	8	30	0.225593	4.43276	1	1.48437e-07	1	7.89205e-06
chr1	214764500	214769999	1	25	0.0597726	16.7301	1	5.07069e-25	1	1.17275e-20
chr1	214963500	214968499	8	29	0.233113	4.28976	1	4.53527e-07	1	2.07912e-05
chr1	214973000	214977999	9	29	0.259015	3.86079	1	4.55877e-06	1	0.000140674
chr1	215234500	215239499	9	22	0.337845	2.95994	1	0.00198736	1	0.0199408
chr1	216244000	216246999	4	19	0.194261	5.14772	1	5.37918e-07	1	2.3902e-05
chr1	216410500	216415999	3	21	0.141281	7.07811	1	1.81333e-10	1	2.5113e-08
chr1	216684500	216691999	12	26	0.374132	2.67285	1	0.00481026	1	0.040033
chr1	216744000	216754499	15	35	0.345353	2.89559	1	0.000434325	1	0.0058266
chr1	217875500	217885499	17	34	0.399622	2.50236	1	0.0058715	1	0.0468101
chr1	218514500	218517999	8	20	0.333019	3.00283	1	0.00222768	1	0.0217575
chr1	219193500	219205999	16	39	0.330244	3.02807	1	9.69537e-05	1	0.00172025
chr1	219740500	219752999	50	17	2.20162	0.45421	7.60718e-08	1	7.05166e-07	1
chr1	219898000	219909999	38	20	1.44308	0.692962	0.00884198	1	0.0244322	1
chr1	220359500	220366499	36	17	1.59726	0.626074	0.00197481	1	0.00621491	1
chr1	220914000	220918499	8	23	0.291391	3.43181	1	0.000183148	1	0.00285626
chr1	221206500	221219999	42	22	1.45273	0.688357	0.00604375	1	0.0172461	1
chr1	221596500	221605999	8	38	0.179318	5.57669	1	6.92337e-12	1	1.66796e-09
chr1	222386000	222394999	38	19	1.51523	0.659964	0.00402445	1	0.0119192	1
chr1	222459500	222467999	37	12	2.27136	0.440265	9.14568e-07	1	6.54966e-06	1
chr1	222760000	222762499	6	19	0.271965	3.67694	1	0.000161327	1	0.00271063
chr1	223384500	223394499	45	22	1.55409	0.643465	0.00137354	1	0.00448182	1
chr1	223460500	223476499	73	25	2.21159	0.452164	2.00765e-10	1	3.72357e-09	1
chr1	223523500	223530999	31	13	1.7761	0.563032	0.000577562	1	0.00204734	1
chr1	223622000	223632999	49	20	1.8501	0.54051	1.46345e-05	1	7.62657e-05	1
chr1	223670500	223675499	9	23	0.323768	3.08863	1	0.000928874	1	0.0109719
chr1	223707000	223720499	57	21	2.04857	0.488146	1.57017e-07	1	1.35807e-06	1
chr1	223738500	223760499	82	46	1.37223	0.728743	0.00200639	1	0.00629502	1
chr1	224163000	224170999	32	14	1.7095	0.584968	0.000974366	1	0.00327903	1
chr1	224489000	224505499	57	18	2.37203	0.42158	8.75329e-10	1	1.39186e-08	1
chr1	224520500	224531999	56	20	2.10912	0.474132	7.37641e-08	1	6.9322e-07	1
chr1	224539000	224542499	1	13	0.111006	9.0085	1	1.18351e-10	1	1.77167e-08
chr1	224620500	224637499	78	42	1.42759	0.70048	0.000861912	1	0.00293994	1
chr1	225427500	225487499	207	134	1.19722	0.835267	0.00468912	1	0.0136828	1
chr1	225703500	225722999	62	33	1.43982	0.694533	0.00190176	1	0.0060149	1
chr1	225840500	225854499	67	25	2.03227	0.492061	2.57509e-08	1	2.74898e-07	1
chr1	225909500	225910999	2	13	0.166509	6.00567	1	5.89676e-07	1	2.52556e-05
chr1	225944000	225949499	39	16	1.82834	0.546945	9.69537e-05	1	0.000411553	1
chr1	226118500	226127499	52	13	2.94166	0.339944	1.2829e-12	1	4.44842e-11	1
chr1	226448500	226460499	44	23	1.45696	0.686362	0.00500349	1	0.0144832	1
chr1	226623500	226629999	32	7	3.2053	0.311983	6.09055e-10	1	1.01049e-08	1
chr1	226671000	226684499	56	25	1.70352	0.58702	4.87627e-05	1	0.000224658	1
chr1	226867500	226871499	9	24	0.310817	3.21732	1	0.000418052	1	0.00578964
chr1	226882500	226890499	41	7	4.07948	0.245129	1.37029e-15	1	1.06708e-13	1
chr1	227766000	227781999	56	33	1.30269	0.767642	0.0190964	1	0.0495608	1
chr1	227808500	227815499	11	25	0.358635	2.78835	1	0.00300833	1	0.0271413
chr1	227913500	227933499	80	49	1.25881	0.794401	0.0167802	1	0.0440188	1
chr1	227937000	227950499	61	16	2.83392	0.352868	1.50581e-13	1	6.6147e-12	1
chr1	228004000	228008999	30	13	1.7206	0.581194	0.00113685	1	0.00377855	1
chr1	228105000	228110499	34	9	2.71965	0.367694	2.26268e-08	1	2.44653e-07	1
chr1	228142000	228148999	38	11	2.52539	0.395978	4.13159e-08	1	4.16364e-07	1
chr1	228304000	228318999	61	35	1.33824	0.747249	0.00950308	1	0.0261325	1
chr1	228331000	228343499	61	26	1.78432	0.560437	6.49185e-06	1	3.73584e-05	1
chr1	228348000	228356499	53	17	2.33113	0.428976	5.15856e-09	1	6.62449e-08	1
chr1	228359500	228377999	83	43	1.48345	0.674106	0.000200785	1	0.000788279	1
chr1	228386000	228405999	80	37	1.65633	0.603745	6.66766e-06	1	3.83034e-05	1
chr1	228659500	228678999	74	38	1.49431	0.669203	0.000315924	1	0.00119527	1
chr1	229024500	229029999	31	14	1.65769	0.603248	0.00183931	1	0.00582773	1
chr1	229087500	229092999	31	12	1.91272	0.522815	0.000150632	1	0.000611357	1
chr1	229107000	229119499	59	22	2.02707	0.493323	1.47438e-07	1	1.29091e-06	1
chr1	229523000	229530999	33	15	1.65122	0.605614	0.00155367	1	0.00501373	1
chr1	229668500	229674999	31	6	3.5522	0.281516	5.5924e-11	1	1.23594e-09	1
chr1	229833500	229840499	10	24	0.341899	2.92484	1	0.00174972	1	0.0179696
chr1	230184000	230196499	45	17	1.98578	0.503581	4.61322e-06	1	2.79525e-05	1
chr1	230503500	230509999	33	13	1.88711	0.529912	0.000136918	1	0.00056146	1
chr1	230731000	230741499	41	21	1.48345	0.674106	0.00454438	1	0.0132814	1
chr1	230745000	230760999	54	21	1.94261	0.514772	1.53807e-06	1	1.04686e-05	1
chr1	231064500	231077499	51	23	1.68359	0.593967	0.000122758	1	0.000510682	1
chr1	231410000	231421499	43	23	1.42458	0.701961	0.00786758	1	0.021984	1
chr1	231760500	231773999	51	29	1.34688	0.742459	0.0132374	1	0.0354059	1
chr1	232006500	232013499	31	13	1.7761	0.563032	0.000577562	1	0.00204734	1
chr1	232305500	232312999	34	15	1.69978	0.58831	0.000832231	1	0.00285069	1
chr1	232479500	232491499	42	19	1.67064	0.598572	0.000432875	1	0.00158173	1
chr1	232975000	232988499	61	27	1.7206	0.581194	1.93961e-05	1	9.88091e-05	1
chr1	233706500	233709499	4	15	0.242826	4.11817	1	9.59692e-05	1	0.00172595
chr1	234102000	234110499	36	13	2.05362	0.486946	1.29037e-05	1	6.84253e-05	1
chr1	234128500	234144999	54	21	1.94261	0.514772	1.53807e-06	1	1.04686e-05	1
chr1	234307000	234319499	45	20	1.7021	0.587511	0.000200097	1	0.000786581	1
chr1	234501500	234507499	29	15	1.45696	0.686362	0.01438	1	0.038162	1
chr1	234656500	234669999	60	30	1.52902	0.654013	0.000527253	1	0.00188373	1
chr1	234898000	234910499	47	16	2.19401	0.455787	1.78846e-07	1	1.50824e-06	1
chr1	234940000	234945499	14	29	0.388522	2.57386	1	0.00601875	1	0.0474201
chr1	234975500	234981499	34	8	3.02184	0.330925	1.26351e-09	1	1.89634e-08	1
chr1	235297000	235300499	4	20	0.18501	5.4051	1	1.30028e-07	1	7.10105e-06
chr1	235516500	235525999	43	21	1.55409	0.643465	0.00164981	1	0.00529294	1
chr1	235607000	235615499	42	17	1.85627	0.538715	4.24479e-05	1	0.000199135	1
chr1	236055000	236065499	39	16	1.82834	0.546945	9.69537e-05	1	0.000411553	1
chr1	236149000	236164499	60	32	1.43635	0.696208	0.00228363	1	0.00711516	1
chr1	236716000	236721499	8	25	0.268977	3.7178	1	2.85175e-05	1	0.000638174
chr1	236776000	236791999	50	17	2.20162	0.45421	7.60718e-08	1	7.05166e-07	1
chr1	239371000	239372499	1	14	0.103606	9.65197	1	1.00958e-11	1	2.21322e-09
chr1	240048000	240053999	9	27	0.277516	3.6034	1	3.07383e-05	1	0.000674174
chr1	240968500	240975499	10	29	0.284916	3.50981	1	3.16762e-05	1	0.000682765
chr1	241296500	241301999	5	26	0.172676	5.79118	1	1.29056e-09	1	1.39804e-07
chr1	241990500	242007999	66	27	1.85935	0.537821	7.82537e-07	1	5.72828e-06	1
chr1	242052500	242064999	61	25	1.85295	0.53968	1.9852e-06	1	1.31107e-05	1
chr1	242630500	242638999	40	7	3.98235	0.251108	6.4284e-15	1	4.15296e-13	1
chr1	243118000	243123999	4	22	0.168923	5.91987	1	6.64704e-09	1	5.57003e-07
chr1	244029000	244033999	8	20	0.333019	3.00283	1	0.00222768	1	0.0217575
chr1	244081500	244091999	53	14	2.79736	0.35748	6.15823e-12	1	1.76709e-10	1
chr1	244134000	244143499	13	31	0.339957	2.94155	1	0.000577562	1	0.00736173
chr1	244189500	244196499	6	27	0.194261	5.14772	1	1.41527e-08	1	1.07495e-06
chr1	244197500	244206999	37	5	4.92128	0.203199	1.94437e-17	1	2.29436e-15	1
chr1	244217000	244239499	89	43	1.58941	0.629165	1.15843e-05	1	6.32635e-05	1
chr1	244629000	244642999	43	18	1.79947	0.555719	7.45063e-05	1	0.000326206	1
chr1	244725000	244727999	4	17	0.215845	4.63295	1	7.97187e-06	1	0.000229463
chr1	244817000	244831499	42	17	1.85627	0.538715	4.24479e-05	1	0.000199135	1
chr1	244933000	244945499	50	24	1.58517	0.630848	0.000562723	1	0.00199918	1
chr1	245026500	245033499	29	13	1.66509	0.600567	0.00217318	1	0.00678062	1
chr1	245331000	245345499	62	35	1.35983	0.735388	0.00658571	1	0.0186981	1
chr1	245353000	245357999	34	17	1.51092	0.661849	0.0058715	1	0.0168314	1
chr1	245537000	245557499	81	29	2.12392	0.470828	1.86596e-10	1	3.52869e-09	1
chr1	245616000	245628999	39	21	1.41281	0.707811	0.0114973	1	0.0311043	1
chr1	245678500	245687499	42	8	3.71254	0.269357	2.54808e-14	1	1.43912e-12	1
chr1	245700500	245709999	42	14	2.22752	0.448929	4.102e-07	1	3.17613e-06	1
chr1	245899500	245908499	45	12	2.74954	0.363697	2.54301e-10	1	4.64204e-09	1
chr1	246007500	246016999	18	41	0.35152	2.84479	1	0.000274911	1	0.00416109
chr1	246500000	246507499	35	19	1.39868	0.714961	0.0168678	1	0.0442009	1
chr1	246676500	246682499	13	29	0.36262	2.75771	1	0.00217318	1	0.021539
chr1	247369500	247378999	44	21	1.58941	0.629165	0.000963654	1	0.00325269	1
chr1	247422500	247432499	43	20	1.62809	0.614216	0.000656601	1	0.002307	1
chr1	247447000	247453999	32	5	4.27374	0.233987	1.09284e-13	1	5.09579e-12	1
chr1	247569000	247581499	18	38	0.37856	2.64159	1	0.00165071	1	0.0171047
chr1	247588000	247592499	5	22	0.202707	4.93323	1	3.32973e-07	1	1.57808e-05
chr1	247732500	247739499	11	27	0.333019	3.00283	1	0.000748298	1	0.00924994
chr1	248737500	248745999	34	11	2.26638	0.441233	2.15481e-06	1	1.4106e-05	1
chr2	27500	40999	45	21	1.62473	0.615488	0.000551572	1	0.00196515	1
chr2	438000	448499	42	8	3.71254	0.269357	2.54808e-14	1	1.43912e-12	1
chr2	456500	469999	45	24	1.42976	0.699418	0.0065165	1	0.0185311	1
chr2	477000	489999	47	19	1.8649	0.53622	1.65245e-05	1	8.53268e-05	1
chr2	594500	605999	45	12	2.74954	0.363697	2.54301e-10	1	4.64204e-09	1
chr2	1582000	1593999	46	13	2.60865	0.383341	1.02251e-09	1	1.58609e-08	1
chr2	1765500	1774999	41	16	1.91975	0.5209	2.28956e-05	1	0.000114579	1
chr2	1826500	1838999	47	17	2.07212	0.482598	9.47415e-07	1	6.74937e-06	1
chr2	1860000	1874999	65	31	1.60265	0.623966	9.53856e-05	1	0.000406014	1
chr2	1998500	2002499	6	21	0.247241	4.04463	1	1.98963e-05	1	0.000485916
chr2	2462500	2474999	45	17	1.98578	0.503581	4.61322e-06	1	2.79525e-05	1
chr2	2506500	2519499	47	17	2.07212	0.482598	9.47415e-07	1	6.74937e-06	1
chr2	2522500	2531499	37	17	1.64043	0.609598	0.00110387	1	0.00368189	1
chr2	2561500	2583499	81	31	1.99117	0.502216	3.5679e-09	1	4.76571e-08	1
chr2	2698500	2711499	63	28	1.71485	0.58314	1.65487e-05	1	8.52235e-05	1
chr2	2724000	2732499	40	14	2.12392	0.470828	2.35511e-06	1	1.4964e-05	1
chr2	3125000	3129499	30	8	2.67648	0.373625	1.48437e-07	1	1.29549e-06	1
chr2	3138000	3152499	57	25	1.7334	0.576899	2.65401e-05	1	0.000131214	1
chr2	3412000	3429499	63	28	1.71485	0.58314	1.65487e-05	1	8.52235e-05	1
chr2	3637000	3649499	51	28	1.39332	0.71771	0.00724122	1	0.0203815	1
chr2	3673000	3682499	37	17	1.64043	0.609598	0.00110387	1	0.00368189	1
chr2	3716500	3725499	39	17	1.72676	0.579118	0.000321152	1	0.00120833	1
chr2	4003500	4007499	7	20	0.296017	3.37819	1	0.000444524	1	0.00577906
chr2	4174500	4176499	6	16	0.319959	3.1254	1	0.0026246	1	0.0243489
chr2	4279500	4288999	35	17	1.55409	0.643465	0.00344776	1	0.0103236	1
chr2	5034000	5041499	32	16	1.50838	0.662964	0.0071014	1	0.0200209	1
chr2	5284000	5289999	4	25	0.149431	6.69203	1	5.64642e-11	1	9.36132e-09
chr2	5586500	5593999	37	14	1.96851	0.507998	2.72131e-05	1	0.000134068	1
chr2	5933000	5946999	56	24	1.77166	0.564443	1.64768e-05	1	8.52516e-05	1
chr2	6067500	6079999	43	23	1.42458	0.701961	0.00786758	1	0.021984	1
chr2	6349500	6354999	8	27	0.249764	4.00378	1	3.84668e-06	1	0.000123051
chr2	6501000	6506499	6	20	0.259015	3.86079	1	5.7919e-05	1	0.00117094
chr2	6605500	6608499	1	17	0.0863382	11.5824	1	4.33594e-15	1	4.1784e-12
chr2	6754500	6762499	32	10	2.33113	0.428976	1.94935e-06	1	1.29684e-05	1
chr2	6805500	6807499	8	19	0.34967	2.85984	1	0.00471378	1	0.0396726
chr2	6920000	6926499	33	13	1.88711	0.529912	0.000136918	1	0.00056146	1
chr2	7370000	7393499	72	40	1.38352	0.722796	0.00271448	1	0.00831641	1
chr2	7651500	7651999	0	11	0.0647536	15.4432	1	1.31923e-08	1	1.0378e-06
chr2	7938500	7945499	8	23	0.291391	3.43181	1	0.000183148	1	0.00285626
chr2	7959500	7966999	40	11	2.6549	0.376662	4.92604e-09	1	6.36833e-08	1
chr2	8150500	8171999	76	31	1.86976	0.534828	1.22487e-07	1	1.09209e-06	1
chr2	8354000	8365499	49	26	1.43897	0.694942	0.00448049	1	0.0131287	1
chr2	8477000	8497499	72	40	1.38352	0.722796	0.00271448	1	0.00831641	1
chr2	8564500	8598499	155	85	1.40952	0.709461	1.6025e-05	1	8.31744e-05	1
chr2	8998000	9004499	33	13	1.88711	0.529912	0.000136918	1	0.00056146	1
chr2	9018500	9021499	6	16	0.319959	3.1254	1	0.0026246	1	0.0243489
chr2	9218000	9253999	157	57	2.11677	0.472417	7.56888e-18	1	9.9462e-16	1
chr2	9266500	9276999	41	19	1.63179	0.612823	0.000781252	1	0.00270208	1
chr2	9287000	9299999	49	27	1.38758	0.72068	0.00870806	1	0.0241227	1
chr2	9692500	9700499	36	13	2.05362	0.486946	1.29037e-05	1	6.84253e-05	1
chr2	9751500	9766999	69	36	1.47008	0.680234	0.000711656	1	0.00247525	1
chr2	9791000	9794499	6	17	0.302184	3.30925	1	0.00108823	1	0.0118636
chr2	9941000	9951499	47	26	1.38141	0.723898	0.0104773	1	0.0285855	1
chr2	10000500	10011499	46	23	1.52171	0.657155	0.00190738	1	0.00602607	1
chr2	10018500	10034499	72	28	1.95601	0.511246	4.22006e-08	1	4.2371e-07	1
chr2	10100000	10108499	35	9	2.79736	0.35748	7.19166e-09	1	8.91843e-08	1
chr2	10149500	10160999	55	22	1.89193	0.52856	2.84761e-06	1	1.79088e-05	1
chr2	10187000	10207499	81	33	1.87405	0.533605	4.86082e-08	1	4.83116e-07	1
chr2	10224000	10240999	77	33	1.78263	0.560969	6.60209e-07	1	4.90344e-06	1
chr2	10485000	10506999	78	29	2.04621	0.488707	1.96498e-09	1	2.82713e-08	1
chr2	10611000	10613499	4	20	0.18501	5.4051	1	1.30028e-07	1	7.10105e-06
chr2	10806500	10818999	48	24	1.52301	0.656597	0.00158502	1	0.0051003	1
chr2	10887500	10898499	42	19	1.67064	0.598572	0.000432875	1	0.00158173	1
chr2	10953500	10961499	35	11	2.33113	0.428976	8.33648e-07	1	6.05832e-06	1
chr2	11062000	11070999	41	17	1.8131	0.551541	8.52106e-05	1	0.000366481	1
chr2	11360000	11369499	35	15	1.74835	0.571969	0.000434325	1	0.00158178	1
chr2	11544500	11554499	40	20	1.51709	0.659159	0.00333579	1	0.0100443	1
chr2	11589500	11604999	76	33	1.75978	0.568254	1.22966e-06	1	8.46922e-06	1
chr2	11610500	11618999	37	17	1.64043	0.609598	0.00110387	1	0.00368189	1
chr2	11651000	11661999	52	17	2.28796	0.43707	1.28828e-08	1	1.49952e-07	1
chr2	11665500	11670499	30	12	1.85295	0.53968	0.000320033	1	0.00120933	1
chr2	11681500	11695999	49	24	1.55409	0.643465	0.000953087	1	0.00322525	1
chr2	11946000	11951499	9	22	0.337845	2.95994	1	0.00198736	1	0.0199408
chr2	12107500	12120999	46	21	1.66005	0.602392	0.000309468	1	0.00117334	1
chr2	12126000	12131499	9	21	0.353202	2.83124	1	0.00408927	1	0.035211
chr2	12779500	12788499	12	29	0.336719	2.96984	1	0.000660082	1	0.00829469
chr2	12814500	12819999	7	23	0.259015	3.86079	1	2.48812e-05	1	0.00059051
chr2	14223000	14223999	2	14	0.155409	6.43465	1	9.99376e-08	1	5.76398e-06
chr2	15408000	15418999	35	11	2.33113	0.428976	8.33648e-07	1	6.05832e-06	1
chr2	15637000	15663999	118	65	1.40103	0.713759	0.000158828	1	0.000641973	1
chr2	15720500	15723999	5	21	0.211921	4.71874	1	1.20845e-06	1	4.60445e-05
chr2	15734000	15739499	39	15	1.94261	0.514772	2.51007e-05	1	0.000124818	1
chr2	15797500	15811999	61	30	1.55409	0.643465	0.000320935	1	0.00121057	1
chr2	15814500	15821499	12	27	0.36077	2.77185	1	0.00256114	1	0.024123
chr2	15847000	15849999	24	7	2.42826	0.411817	8.78901e-06	1	4.94279e-05	1
chr2	16175000	16190999	54	23	1.78072	0.561569	1.90565e-05	1	9.73471e-05	1
chr2	16321000	16330999	37	18	1.55409	0.643465	0.00286578	1	0.00871184	1
chr2	16631000	16648499	72	33	1.66836	0.599392	1.30585e-05	1	6.90167e-05	1
chr2	16712500	16715999	7	19	0.310817	3.21732	1	0.00106766	1	0.0118716
chr2	17606000	17619499	58	26	1.69798	0.588934	4.14792e-05	1	0.000195562	1
chr2	17637500	17645499	29	14	1.55409	0.643465	0.00601875	1	0.0172205	1
chr2	17695500	17698499	5	17	0.259015	3.86079	1	0.000133988	1	0.00233173
chr2	18470500	18472499	5	16	0.274251	3.6463	1	0.000384783	1	0.00552749
chr2	18905500	18909999	11	26	0.345353	2.89559	1	0.00152567	1	0.0160353
chr2	19354500	19361999	31	13	1.7761	0.563032	0.000577562	1	0.00204734	1
chr2	19810500	19820999	45	25	1.37477	0.727395	0.0126128	1	0.0339274	1
chr2	19869000	19879499	41	18	1.71768	0.582182	0.000274911	1	0.00105189	1
chr2	19917000	19928499	47	17	2.07212	0.482598	9.47415e-07	1	6.74937e-06	1
chr2	20110000	20117999	39	16	1.82834	0.546945	9.69537e-05	1	0.000411553	1
chr2	20145500	20146999	5	15	0.291391	3.43181	1	0.00104737	1	0.0118482
chr2	20156000	20170999	58	30	1.47889	0.676183	0.00135984	1	0.0044437	1
chr2	20183000	20192999	49	13	2.77516	0.36034	3.95184e-11	1	9.06727e-10	1
chr2	20199000	20221499	111	48	1.7761	0.563032	6.08947e-09	1	7.6542e-08	1
chr2	20235000	20248999	60	30	1.52902	0.654013	0.000527253	1	0.00188373	1
chr2	20329000	20335499	7	20	0.296017	3.37819	1	0.000444524	1	0.00577906
chr2	20382500	20401499	76	39	1.49581	0.668535	0.000263651	1	0.00101358	1
chr2	20419500	20437499	76	26	2.21601	0.451261	8.62139e-11	1	1.79798e-09	1
chr2	20629500	20638499	43	18	1.79947	0.555719	7.45063e-05	1	0.000326206	1
chr2	20662000	20676999	63	24	1.98923	0.502707	1.26719e-07	1	1.12656e-06	1
chr2	20926000	20936999	44	19	1.74835	0.571969	0.000124684	1	0.00051545	1
chr2	21461500	21465999	7	21	0.282561	3.53906	1	0.000177212	1	0.00285017
chr2	22919500	22931999	54	27	1.52634	0.655164	0.000912355	1	0.00310605	1
chr2	22946500	22956499	43	15	2.13687	0.467974	9.9696e-07	1	6.93152e-06	1
chr2	23066000	23073999	38	8	3.36719	0.296984	6.92337e-12	1	1.95273e-10	1
chr2	23378500	23399999	80	38	1.61386	0.619633	1.6543e-05	1	8.52701e-05	1
chr2	23481500	23489999	48	22	1.65544	0.604069	0.000261298	1	0.00100571	1
chr2	23494500	23520499	100	53	1.45336	0.688061	0.000121748	1	0.00050712	1
chr2	23592000	23603499	53	16	2.46826	0.405144	6.8182e-10	1	1.11285e-08	1
chr2	23632000	23642999	49	27	1.38758	0.72068	0.00870806	1	0.0241227	1
chr2	23659000	23672999	74	28	2.0096	0.497613	9.6449e-09	1	1.15939e-07	1
chr2	23703500	23712499	43	12	2.62999	0.380229	2.25434e-09	1	3.17144e-08	1
chr2	23759500	23765499	7	21	0.282561	3.53906	1	0.000177212	1	0.00285017
chr2	24006000	24017499	62	16	2.87963	0.347267	4.88554e-14	1	2.5564e-12	1
chr2	24199500	24209999	52	29	1.37278	0.72845	0.00900479	1	0.0248375	1
chr2	24826500	24864499	150	60	1.9235	0.519885	7.55922e-14	1	3.7924e-12	1
chr2	24928500	24937499	38	9	3.03047	0.329982	1.97306e-10	1	3.69497e-09	1
chr2	25014000	25026499	49	20	1.8501	0.54051	1.46345e-05	1	7.62657e-05	1
chr2	25029500	25035499	36	8	3.19451	0.313037	9.85427e-11	1	2.00713e-09	1
chr2	25159000	25171499	53	31	1.31126	0.762625	0.0191608	1	0.0496279	1
chr2	25194000	25205499	53	26	1.55409	0.643465	0.000662252	1	0.00231788	1
chr2	25220500	25226499	30	10	2.18985	0.456652	1.28866e-05	1	6.88716e-05	1
chr2	25354500	25364499	48	20	1.8131	0.551541	2.89702e-05	1	0.000141789	1
chr2	25404000	25411999	33	9	2.64195	0.378509	6.92694e-08	1	6.5915e-07	1
chr2	25573000	25573499	1	11	0.129507	7.72158	1	1.31923e-08	1	1.0378e-06
chr2	25976000	25987999	61	24	1.92707	0.518923	5.5046e-07	1	4.14759e-06	1
chr2	26139500	26150999	50	28	1.36652	0.731783	0.0108084	1	0.0293693	1
chr2	26155000	26167999	43	24	1.3676	0.73121	0.0151921	1	0.0401949	1
chr2	26180000	26203999	92	48	1.4748	0.678059	0.000126958	1	0.000524198	1
chr2	26478500	26495999	79	29	2.07212	0.482598	9.07337e-10	1	1.43683e-08	1
chr2	26508000	26540499	132	60	1.69421	0.590246	5.31421e-09	1	6.80172e-08	1
chr2	26580500	26590999	47	10	3.39074	0.294921	5.09219e-14	1	2.63768e-12	1
chr2	26624000	26625999	4	14	0.259015	3.86079	1	0.000305909	1	0.00456162
chr2	26647500	26653999	32	17	1.42458	0.701961	0.0157749	1	0.0415989	1
chr2	26666000	26696999	142	59	1.85195	0.53997	4.55597e-12	1	1.33549e-10	1
chr2	26784000	26795499	40	20	1.51709	0.659159	0.00333579	1	0.0100443	1
chr2	26904000	26907999	28	4	4.50685	0.221884	3.43425e-13	1	1.38496e-11	1
chr2	26938000	26950499	54	26	1.58287	0.631765	0.000393327	1	0.00144464	1
chr2	26960500	26970999	40	18	1.67678	0.596382	0.000511052	1	0.00183094	1
chr2	27013000	27023999	61	26	1.78432	0.560437	6.49185e-06	1	3.73584e-05	1
chr2	27048000	27059999	59	25	1.79318	0.557669	7.49086e-06	1	4.27194e-05	1
chr2	27231000	27249999	92	47	1.50552	0.664222	6.26226e-05	1	0.00028186	1
chr2	27253500	27262999	40	19	1.59294	0.62777	0.00137965	1	0.00449163	1
chr2	27294000	27301999	38	13	2.16462	0.461975	2.35132e-06	1	1.50059e-05	1
chr2	27321000	27330999	50	19	1.98146	0.504678	1.836e-06	1	1.2269e-05	1
chr2	27448500	27455499	36	15	1.79691	0.55651	0.00022096	1	0.000863235	1
chr2	27484000	27495499	49	20	1.8501	0.54051	1.46345e-05	1	7.62657e-05	1
chr2	27751000	27758999	41	13	2.33113	0.428976	1.52666e-07	1	1.32615e-06	1
chr2	27889500	27896499	29	4	4.66226	0.214488	5.85454e-14	1	2.98575e-12	1
chr2	28115500	28122499	35	10	2.54305	0.393228	9.26749e-08	1	8.4535e-07	1
chr2	28342000	28353999	54	28	1.4737	0.678563	0.00196718	1	0.00620271	1
chr2	28373500	28381999	44	22	1.5203	0.657764	0.0022966	1	0.00714161	1
chr2	28399000	28409999	45	25	1.37477	0.727395	0.0126128	1	0.0339274	1
chr2	28429000	28437999	34	18	1.4314	0.698619	0.0129904	1	0.0348096	1
chr2	28522000	28530999	44	21	1.58941	0.629165	0.000963654	1	0.00325269	1
chr2	28541000	28569999	106	52	1.56875	0.637451	3.91905e-06	1	2.40551e-05	1
chr2	28621000	28643499	83	48	1.33207	0.750709	0.00411467	1	0.0121453	1
chr2	29021000	29051499	128	55	1.78998	0.558667	3.46546e-10	1	6.13229e-09	1
chr2	29644500	29648499	4	22	0.168923	5.91987	1	6.64704e-09	1	5.57003e-07
chr2	29652500	29660499	31	15	1.55409	0.643465	0.00499657	1	0.0144768	1
chr2	29696000	29702499	8	29	0.233113	4.28976	1	4.53527e-07	1	2.07912e-05
chr2	29703000	29709999	33	15	1.65122	0.605614	0.00155367	1	0.00501373	1
chr2	29797000	29805499	12	31	0.315674	3.16783	1	0.000150632	1	0.00257203
chr2	30131500	30141999	38	17	1.68359	0.593967	0.000602438	1	0.00212737	1
chr2	30247500	30256499	43	13	2.44214	0.409477	2.19947e-08	1	2.4046e-07	1
chr2	30509000	30510499	1	13	0.111006	9.0085	1	1.18351e-10	1	1.77167e-08
chr2	30659000	30666499	37	17	1.64043	0.609598	0.00110387	1	0.00368189	1
chr2	30687000	30694999	37	8	3.28085	0.304799	2.64544e-11	1	6.30111e-10	1
chr2	30745500	30754999	51	14	2.69375	0.37123	5.52773e-11	1	1.23047e-09	1
chr2	30992000	30998999	33	12	2.03227	0.492061	3.06212e-05	1	0.000148176	1
chr2	31187000	31195499	34	13	1.94261	0.514772	6.39744e-05	1	0.000286411	1
chr2	32731500	32742499	17	34	0.399622	2.50236	1	0.0058715	1	0.0468101
chr2	33083000	33091499	38	6	4.32924	0.230987	1.12218e-15	1	8.94961e-14	1
chr2	34215000	34229499	42	18	1.75857	0.568643	0.000144669	1	0.000589796	1
chr2	34965500	34967499	5	14	0.310817	3.21732	1	0.00269492	1	0.0247334
chr2	35047000	35050999	2	23	0.0971304	10.2954	1	9.78324e-16	1	1.25704e-12
chr2	36757500	36767999	48	13	2.71965	0.367694	1.19229e-10	1	2.37411e-09	1
chr2	36772000	36781499	41	19	1.63179	0.612823	0.000781252	1	0.00270208	1
chr2	36805000	36807499	4	16	0.228542	4.37556	1	2.84248e-05	1	0.000649934
chr2	37166500	37176999	35	5	4.66226	0.214488	6.67266e-16	1	5.58138e-14	1
chr2	37421000	37424999	7	22	0.270276	3.69992	1	6.77532e-05	1	0.00132572
chr2	37456500	37461499	29	4	4.66226	0.214488	5.85454e-14	1	2.98575e-12	1
chr2	38278000	38287999	39	18	1.63588	0.611291	0.000929006	1	0.00315415	1
chr2	38648000	38655999	40	16	1.87405	0.533605	4.76544e-05	1	0.000220983	1
chr2	39631500	39639499	35	9	2.79736	0.35748	7.19166e-09	1	8.91843e-08	1
chr2	41698000	41710499	47	15	2.33113	0.428976	2.80261e-08	1	2.96789e-07	1
chr2	41783000	41792999	34	17	1.51092	0.661849	0.0058715	1	0.0168314	1
chr2	41874500	41884999	40	20	1.51709	0.659159	0.00333579	1	0.0100443	1
chr2	42067000	42081499	61	30	1.55409	0.643465	0.000320935	1	0.00121057	1
chr2	42124000	42127499	5	19	0.233113	4.28976	1	1.39704e-05	1	0.000356631
chr2	42411500	42414499	3	16	0.182834	5.46945	1	7.06228e-07	1	2.84806e-05
chr2	42840500	42856499	65	32	1.55409	0.643465	0.000223787	1	0.000872586	1
chr2	42966000	42974499	40	22	1.38516	0.721936	0.0146435	1	0.0388233	1
chr2	43005500	43011999	41	19	1.63179	0.612823	0.000781252	1	0.00270208	1
chr2	43037000	43041999	27	6	3.10817	0.321732	1.41527e-08	1	1.60926e-07	1
chr2	43055000	43060999	37	11	2.46064	0.406399	1.15363e-07	1	1.03436e-06	1
chr2	43152000	43181499	109	59	1.42458	0.701961	0.000142255	1	0.000581798	1
chr2	43397000	43398999	5	15	0.291391	3.43181	1	0.00104737	1	0.0118482
chr2	43550000	43554999	6	21	0.247241	4.04463	1	1.98963e-05	1	0.000485916
chr2	43991500	43997499	32	11	2.13687	0.467974	1.32665e-05	1	6.95992e-05	1
chr2	44384000	44393999	14	34	0.333019	3.00283	1	0.000251893	1	0.00382771
chr2	44795500	44818499	99	50	1.52361	0.656334	2.32138e-05	1	0.000115846	1
chr2	44883500	44905999	85	47	1.3922	0.718286	0.00115913	1	0.00383194	1
chr2	44921500	44935999	52	23	1.71597	0.58276	6.71419e-05	1	0.000298082	1
chr2	44944500	44956499	50	22	1.72301	0.58038	7.8611e-05	1	0.00034079	1
chr2	45676000	45692499	55	21	1.97793	0.505579	7.31103e-07	1	5.37304e-06	1
chr2	45832000	45841999	51	13	2.88616	0.346481	4.09782e-12	1	1.23244e-10	1
chr2	45857000	45873999	76	33	1.75978	0.568254	1.22966e-06	1	8.46922e-06	1
chr2	46139000	46145499	32	8	2.84916	0.350981	1.45136e-08	1	1.63383e-07	1
chr2	46151000	46174999	92	37	1.90171	0.525842	3.89772e-09	1	5.15418e-08	1
chr2	46227000	46241999	56	29	1.47638	0.677331	0.00163513	1	0.00525606	1
chr2	46264500	46279499	67	33	1.55409	0.643465	0.000186942	1	0.000741103	1
chr2	46380000	46383999	28	10	2.04857	0.488146	7.54771e-05	1	0.000328776	1
chr2	46475000	46478999	28	4	4.50685	0.221884	3.43425e-13	1	1.38496e-11	1
chr2	46647000	46653999	36	14	1.91671	0.521728	5.86063e-05	1	0.000264891	1
chr2	46845500	46853999	42	16	1.96546	0.508786	1.07573e-05	1	5.91524e-05	1
chr2	47041500	47051499	48	27	1.35983	0.735388	0.0129781	1	0.034827	1
chr2	47237500	47249499	51	18	2.12665	0.470224	1.77462e-07	1	1.50177e-06	1
chr2	47257500	47269999	57	16	2.65109	0.377203	1.15847e-11	1	3.09032e-10	1
chr2	47300500	47312499	54	23	1.78072	0.561569	1.90565e-05	1	9.73471e-05	1
chr2	47505500	47520999	62	13	3.4967	0.285984	4.44769e-18	1	6.33023e-16	1
chr2	47531500	47535999	27	5	3.6262	0.275771	2.9366e-10	1	5.29572e-09	1
chr2	47631500	47640999	33	14	1.7613	0.567763	0.000502134	1	0.00180542	1
chr2	48103000	48111999	43	16	2.01117	0.497223	4.94481e-06	1	2.97551e-05	1
chr2	48377500	48383999	14	29	0.388522	2.57386	1	0.00601875	1	0.0474201
chr2	48464000	48470999	12	31	0.315674	3.16783	1	0.000150632	1	0.00257203
chr2	49105500	49120499	59	27	1.66509	0.600567	6.30735e-05	1	0.000283503	1
chr2	49661000	49669999	33	13	1.88711	0.529912	0.000136918	1	0.00056146	1
chr2	51974000	51979499	2	19	0.116557	8.57953	1	5.80985e-12	1	1.45265e-09
chr2	52338000	52344499	5	26	0.172676	5.79118	1	1.29056e-09	1	1.39804e-07
chr2	52779000	52786499	11	25	0.358635	2.78835	1	0.00300833	1	0.0271413
chr2	53502500	53510499	41	9	3.26358	0.306412	4.33162e-12	1	1.28274e-10	1
chr2	53959500	53980499	78	30	1.98021	0.504998	8.13539e-09	1	9.8977e-08	1
chr2	54213000	54221499	36	13	2.05362	0.486946	1.29037e-05	1	6.84253e-05	1
chr2	54370500	54391999	90	30	2.281	0.438404	5.28826e-13	1	2.04015e-11	1
chr2	54751000	54758999	38	16	1.78263	0.560969	0.000192723	1	0.000760825	1
chr2	54857500	54861499	10	26	0.316573	3.15883	1	0.000388928	1	0.00546816
chr2	55063500	55072499	16	34	0.377421	2.64956	1	0.00236206	1	0.0227576
chr2	55109000	55117499	34	18	1.4314	0.698619	0.0129904	1	0.0348096	1
chr2	55156500	55163999	37	14	1.96851	0.507998	2.72131e-05	1	0.000134068	1
chr2	55228000	55237499	42	14	2.22752	0.448929	4.102e-07	1	3.17613e-06	1
chr2	56143500	56151499	36	16	1.69121	0.591292	0.000708867	1	0.00247057	1
chr2	57144500	57147499	25	10	1.83665	0.54447	0.000839474	1	0.00286891	1
chr2	57460500	57464499	7	19	0.310817	3.21732	1	0.00106766	1	0.0118716
chr2	58727500	58732999	9	23	0.323768	3.08863	1	0.000928874	1	0.0109719
chr2	59845500	59851999	8	21	0.317881	3.14583	1	0.00100885	1	0.0116112
chr2	60063500	60068999	32	17	1.42458	0.701961	0.0157749	1	0.0415989	1
chr2	60175000	60181499	36	11	2.39588	0.417382	3.14131e-07	1	2.52835e-06	1
chr2	60305500	60317999	43	22	1.48652	0.672713	0.00376372	1	0.01119	1
chr2	60456500	60465499	36	16	1.69121	0.591292	0.000708867	1	0.00247057	1
chr2	60476500	60489999	53	25	1.61386	0.619633	0.000273811	1	0.00105072	1
chr2	60504000	60516499	60	35	1.31666	0.759499	0.0135188	1	0.0360397	1
chr2	60528000	60540999	50	21	1.80133	0.555146	2.52791e-05	1	0.000125288	1
chr2	60605500	60608499	6	19	0.271965	3.67694	1	0.000161327	1	0.00271063
chr2	60631000	60646999	56	31	1.38411	0.722487	0.00625673	1	0.0178264	1
chr2	60971500	60977499	33	13	1.88711	0.529912	0.000136918	1	0.00056146	1
chr2	61773500	61780999	15	31	0.388522	2.57386	1	0.00499657	1	0.0412496
chr2	61853000	61866999	57	24	1.80274	0.554711	8.62147e-06	1	4.86454e-05	1
chr2	62208500	62217999	39	21	1.41281	0.707811	0.0114973	1	0.0311043	1
chr2	62974500	62980499	3	23	0.129507	7.72158	1	4.82067e-12	1	1.26696e-09
chr2	63094500	63099499	9	24	0.310817	3.21732	1	0.000418052	1	0.00578964
chr2	63430500	63438999	10	26	0.316573	3.15883	1	0.000388928	1	0.00546816
chr2	63961000	63968499	10	24	0.341899	2.92484	1	0.00174972	1	0.0179696
chr2	64154500	64161999	9	25	0.298863	3.34602	1	0.000181391	1	0.00287146
chr2	64249500	64252999	23	9	1.8649	0.53622	0.000928874	1	0.0031581	1
chr2	64478000	64481999	9	21	0.353202	2.83124	1	0.00408927	1	0.035211
chr2	64534500	64539999	25	3	5.05078	0.197989	1.09101e-13	1	5.16011e-12	1
chr2	64619500	64627999	39	20	1.48008	0.675638	0.00549163	1	0.0158288	1
chr2	64909500	64920499	42	22	1.45273	0.688357	0.00604375	1	0.0172461	1
chr2	65064500	65082999	67	31	1.65122	0.605614	3.20872e-05	1	0.000153504	1
chr2	65173500	65182499	38	17	1.68359	0.593967	0.000602438	1	0.00212737	1
chr2	65294000	65296999	24	4	3.88522	0.257386	2.87721e-10	1	5.21711e-09	1
chr2	65351000	65359499	41	9	3.26358	0.306412	4.33162e-12	1	1.28274e-10	1
chr2	65405500	65416499	48	16	2.23971	0.446486	7.41398e-08	1	6.93651e-07	1
chr2	65451500	65464499	45	22	1.55409	0.643465	0.00137354	1	0.00448182	1
chr2	65606000	65612499	34	14	1.8131	0.551541	0.000251893	1	0.000974373	1
chr2	65951000	65962999	55	25	1.67363	0.597503	8.81337e-05	1	0.000377788	1
chr2	66017000	66023499	7	21	0.282561	3.53906	1	0.000177212	1	0.00285017
chr2	66295500	66306999	47	20	1.7761	0.563032	5.62618e-05	1	0.00025602	1
chr2	66516500	66522999	10	28	0.294741	3.39281	1	7.54771e-05	1	0.00140268
chr2	66658500	66658999	1	12	0.119545	8.36504	1	1.29602e-09	1	1.36869e-07
chr2	67495000	67497499	5	18	0.245382	4.07528	1	4.43333e-05	1	0.000938097
chr2	68424000	68429499	9	28	0.267946	3.73209	1	1.20305e-05	1	0.00032562
chr2	69625000	69652499	99	58	1.31702	0.759288	0.00293731	1	0.0089094	1
chr2	69795000	69801499	33	12	2.03227	0.492061	3.06212e-05	1	0.000148176	1
chr2	69808500	69818499	41	15	2.03974	0.490259	5.23245e-06	1	3.11055e-05	1
chr2	69947500	69972499	113	48	1.80782	0.553154	1.76855e-09	1	2.56285e-08	1
chr2	70510000	70514999	30	6	3.44119	0.290597	2.33925e-10	1	4.30922e-09	1
chr2	70700500	70723499	90	51	1.35983	0.735388	0.00174749	1	0.00557384	1
chr2	70743500	70757999	57	30	1.45382	0.687841	0.00213402	1	0.00667283	1
chr2	70783000	70790499	39	12	2.3909	0.418252	1.3573e-07	1	1.19861e-06	1
chr2	70975500	70992499	59	27	1.66509	0.600567	6.30735e-05	1	0.000283503	1
chr2	70999500	71008999	36	17	1.59726	0.626074	0.00197481	1	0.00621491	1
chr2	71154500	71157499	27	1	10.8786	0.0919235	1.10705e-27	1	1.04505e-24	1
chr2	71479000	71489999	64	30	1.62928	0.613766	6.62301e-05	1	0.000294769	1
chr2	71494000	71495499	1	15	0.0971304	10.2954	1	8.07937e-13	1	2.45868e-10
chr2	71602500	71612499	62	26	1.8131	0.551541	3.39245e-06	1	2.10689e-05	1
chr2	71638000	71642999	7	20	0.296017	3.37819	1	0.000444524	1	0.00577906
chr2	71780000	71791499	53	19	2.09802	0.47664	1.72537e-07	1	1.47575e-06	1
chr2	71867000	71875999	39	13	2.22012	0.450425	9.67581e-07	1	6.85082e-06	1
chr2	72000000	72015499	73	35	1.59726	0.626074	4.72077e-05	1	0.000219793	1
chr2	72075000	72087999	56	22	1.92572	0.519287	1.39241e-06	1	9.51925e-06	1
chr2	72110500	72118999	36	14	1.91671	0.521728	5.86063e-05	1	0.000264891	1
chr2	72130000	72143999	62	28	1.68806	0.592396	2.99235e-05	1	0.000145378	1
chr2	72819000	72834499	49	12	2.98863	0.334602	2.52335e-12	1	8.06078e-11	1
chr2	72945500	72950499	33	9	2.64195	0.378509	6.92694e-08	1	6.5915e-07	1
chr2	72981000	72984999	27	5	3.6262	0.275771	2.9366e-10	1	5.29572e-09	1
chr2	73079500	73115499	138	76	1.40271	0.712903	5.1021e-05	1	0.000234782	1
chr2	73137500	73144999	14	32	0.353202	2.83124	1	0.000974366	1	0.0113527
chr2	73185000	73194499	37	15	1.84548	0.541865	0.000109641	1	0.000460297	1
chr2	73279000	73285499	37	17	1.64043	0.609598	0.00110387	1	0.00368189	1
chr2	73499500	73502499	2	19	0.116557	8.57953	1	5.80985e-12	1	1.45265e-09
chr2	73993500	73994499	2	12	0.179318	5.57669	1	3.25351e-06	1	0.000105167
chr2	74191500	74199499	32	11	2.13687	0.467974	1.32665e-05	1	6.95992e-05	1
chr2	74354500	74379999	93	50	1.4322	0.698228	0.000311846	1	0.00118013	1
chr2	74384000	74392999	40	17	1.76993	0.564993	0.000167305	1	0.000671308	1
chr2	74524500	74556999	134	71	1.45696	0.686362	1.17406e-05	1	6.37109e-05	1
chr2	74915500	74933999	67	39	1.32097	0.757017	0.00958314	1	0.0262964	1
chr2	74952500	74959499	33	10	2.40177	0.416359	7.2599e-07	1	5.35759e-06	1
chr2	75259500	75269999	51	13	2.88616	0.346481	4.09782e-12	1	1.23244e-10	1
chr2	75482500	75493999	52	23	1.71597	0.58276	6.71419e-05	1	0.000298082	1
chr2	75813000	75819499	13	28	0.375124	2.66578	1	0.00403151	1	0.0350793
chr2	76549500	76560499	16	33	0.388522	2.57386	1	0.00414967	1	0.035382
chr2	77315000	77324499	14	29	0.388522	2.57386	1	0.00601875	1	0.0474201
chr2	78109500	78111999	6	16	0.319959	3.1254	1	0.0026246	1	0.0243489
chr2	81195000	81206499	41	12	2.51045	0.398335	1.83097e-08	1	2.03053e-07	1
chr2	81998500	82003999	6	21	0.247241	4.04463	1	1.98963e-05	1	0.000485916
chr2	82893000	82896999	7	19	0.310817	3.21732	1	0.00106766	1	0.0118716
chr2	84412000	84413499	0	16	0.0457084	21.8778	1	6.08887e-14	1	3.35294e-11
chr2	84841000	84849499	38	21	1.37749	0.72596	0.0176998	1	0.0462321	1
chr2	84941500	84951499	47	18	1.96306	0.509409	4.25727e-06	1	2.59966e-05	1
chr2	85389000	85395499	49	10	3.53202	0.283124	3.39599e-15	1	2.38731e-13	1
chr2	85408500	85418499	42	17	1.85627	0.538715	4.24479e-05	1	0.000199135	1
chr2	85531500	85537499	11	26	0.345353	2.89559	1	0.00152567	1	0.0160353
chr2	85599000	85600999	21	3	4.27374	0.233987	1.81333e-10	1	3.43901e-09	1
chr2	85795000	85802499	40	16	1.87405	0.533605	4.76544e-05	1	0.000220983	1
chr2	85836500	85842999	31	14	1.65769	0.603248	0.00183931	1	0.00582773	1
chr2	85949500	85953999	27	12	1.67363	0.597503	0.00256114	1	0.00787374	1
chr2	86044500	86053999	38	14	2.02031	0.494973	1.23286e-05	1	6.62722e-05	1
chr2	86138000	86144999	37	18	1.55409	0.643465	0.00286578	1	0.00871184	1
chr2	86322500	86327999	34	9	2.71965	0.367694	2.26268e-08	1	2.44653e-07	1
chr2	88705500	88712499	11	27	0.333019	3.00283	1	0.000748298	1	0.00924994
chr2	94867500	94880999	61	30	1.55409	0.643465	0.000320935	1	0.00121057	1
chr2	95087000	95095499	40	18	1.67678	0.596382	0.000511052	1	0.00183094	1
chr2	95132500	95142499	12	33	0.297105	3.36581	1	3.06212e-05	1	0.000677386
chr2	95206000	95218999	52	27	1.47083	0.679887	0.00236796	1	0.0073305	1
chr2	95348500	95360999	52	18	2.16754	0.461352	7.65248e-08	1	7.06816e-07	1
chr2	95392500	95404499	48	20	1.8131	0.551541	2.89702e-05	1	0.000141789	1
chr2	96114000	96139499	121	50	1.85881	0.537979	1.04179e-10	1	2.09153e-09	1
chr2	96144000	96159499	77	29	2.02031	0.494973	4.20378e-09	1	5.51788e-08	1
chr2	96186500	96194999	13	29	0.36262	2.75771	1	0.00217318	1	0.021539
chr2	96325500	96332999	43	10	3.10817	0.321732	8.945e-12	1	2.45993e-10	1
chr2	96507500	96512999	34	15	1.69978	0.58831	0.000832231	1	0.00285069	1
chr2	96558500	96568499	38	19	1.51523	0.659964	0.00402445	1	0.0119192	1
chr2	96598500	96605999	9	28	0.267946	3.73209	1	1.20305e-05	1	0.00032562
chr2	96788500	96795499	40	12	2.45068	0.408051	5.04365e-08	1	4.98715e-07	1
chr2	96815000	96823499	41	12	2.51045	0.398335	1.83097e-08	1	2.03053e-07	1
chr2	96985000	96995499	39	13	2.22012	0.450425	9.67581e-07	1	6.85082e-06	1
chr2	97654000	97669999	61	17	2.67648	0.373625	1.83798e-12	1	6.16069e-11	1
chr2	97728000	97736499	41	9	3.26358	0.306412	4.33162e-12	1	1.28274e-10	1
chr2	98027500	98040499	51	22	1.75679	0.569219	4.19451e-05	1	0.000197377	1
[truncated: 10,502 more rows]

## Sheet: H3K9me2_DLD1
Chromosome	Start	End	KO	WT	FC_KO	FC_WT	P_KO	P_WT	FDR_KO	FDR_WT
[truncated: 20,902 more rows]

[truncated: 2 more sheets: H3K14ac_DLD1, H3K27me3_DLD1]
