# Supplementary material
Source: Research Square preprint supplement (doi:10.21203/rs.3.rs-9763213/v1)
Supplement: Supplementary file 4 [file 40d96e96daaf24d2b1ccfde0.xlsx]

## Sheet: count_data_expression_genes_RNA
GeneName	SW1116_CE1	SW1116_CE2	SW1116_CE3	SW1116_CE4	SW1116_KOE1	SW1116_KOE2	SW1116_KOE3	SW1116_KOE4	DLD1_CE1	DLD1_CE2	DLD1_CE3	DLD1_CE4	DLD1_KOE1	DLD1_KOE2	DLD1_KOE3	DLD1_KOE4
ENSG00000000003.15_TSPAN6	325	324	307	320	599	642	643	624	433	464	435	418	685	788	759	737
ENSG00000000005.6_TNMD	0	0	0	0	0	0	0	0	0	0	0	0	0	0	0	0
ENSG00000000419.14_DPM1	810	836	802	788	854	808	807	834	376	366	320	310	456	499	526	512
ENSG00000000457.14_SCYL3	35	50	43	39	45	46	43	49	147	111	96	112	138	141	151	165
ENSG00000000460.17_C1orf112	150	157	165	162	199	175	175	167	53	61	62	54	109	119	124	104
ENSG00000000938.13_FGR	0	0	0	0	0	0	0	0	1	0	0	0	0	2	0	0
ENSG00000000971.16_CFH	0	0	0	0	0	0	0	2	1	3	0	0	1	3	4	1
ENSG00000001036.14_FUCA2	4215	4311	3916	3819	5241	5236	5514	5511	2768	2585	2435	2346	2864	2765	2984	2888
ENSG00000001084.13_GCLC	405	403	368	387	275	286	278	284	632	649	517	546	758	783	834	869
ENSG00000001167.15_NFYA	808	758	705	699	551	564	590	596	400	385	333	347	393	348	395	396
ENSG00000001460.18_STPG1	151	159	142	134	106	111	128	105	153	158	125	139	172	180	212	172
ENSG00000001461.17_NIPAL3	485	483	436	410	420	387	455	426	562	549	509	445	714	705	768	763
ENSG00000001497.18_LAS1L	891	845	766	757	682	642	760	685	570	602	547	551	562	555	530	576
ENSG00000001561.7_ENPP4	218	216	215	183	319	356	338	370	374	355	285	309	456	400	475	484
ENSG00000001617.12_SEMA3F	163	133	150	138	118	141	126	125	1147	1229	1033	986	728	771	812	834
ENSG00000001626.16_CFTR	0	0	0	0	0	0	0	0	675	662	551	537	459	451	502	549
ENSG00000001629.10_ANKIB1	605	592	546	511	432	420	458	466	692	643	568	553	700	685	751	773
ENSG00000001630.17_CYP51A1	4167	4224	3805	3966	5018	5054	5156	5270	2391	2326	1993	1956	3020	3029	3305	3335
ENSG00000001631.16_KRIT1	580	642	514	517	416	427	475	491	304	301	232	259	248	249	280	289
ENSG00000002016.18_RAD52	167	185	134	169	140	144	171	142	255	226	182	184	155	174	189	219
ENSG00000002079.14_MYH16	45	57	41	43	94	108	101	122	11	3	6	2	9	6	9	11
ENSG00000002330.14_BAD	251	255	205	218	185	181	218	203	165	182	156	172	202	226	221	207
ENSG00000002549.13_LAP3	1051	1010	943	924	845	884	887	930	557	531	450	500	575	589	619	620
ENSG00000002586.20_CD99	1483	1432	1357	1310	1713	1680	1754	1791	1711	1762	1611	1569	2219	2232	2256	2327
ENSG00000002586.20_PAR_Y_CD99	1483	1432	1357	1310	1713	1680	1754	1791	1711	1762	1611	1569	2219	2232	2256	2327
ENSG00000002587.10_HS3ST1	0	0	0	0	0	0	2	2	57	50	66	46	67	65	67	55
ENSG00000002726.21_AOC1	0	1	0	1	1	1	1	1	0	4	0	4	6	0	2	6
ENSG00000002745.13_WNT16	0	1	1	0	1	0	1	2	4	2	4	0	5	3	4	5
ENSG00000002746.15_HECW1	17	22	16	22	41	27	34	36	16	12	17	11	15	18	17	13
ENSG00000002822.16_MAD1L1	482	463	431	455	308	306	325	285	428	413	347	370	405	415	433	458
ENSG00000002834.18_LASP1	3276	3238	3027	2960	2232	2272	2304	2325	4293	4366	3810	3858	5009	5044	5337	5254
ENSG00000002919.15_SNX11	191	211	181	166	166	176	184	194	156	144	138	113	184	194	211	204
ENSG00000002933.9_TMEM176A	0	0	0	0	0	0	0	0	0	0	1	0	0	0	0	0
ENSG00000003056.8_M6PR	4628	4425	4138	4128	5511	5489	5762	5756	1572	1598	1374	1362	1735	1621	1802	1802
ENSG00000003096.14_KLHL13	0	0	0	0	0	0	0	0	5	3	7	3	8	3	3	6
ENSG00000003137.9_CYP26B1	148	173	161	132	158	146	153	165	610	609	541	547	652	624	659	673
ENSG00000003147.19_ICA1	24	22	20	19	21	15	16	23	389	443	347	365	398	401	443	421
ENSG00000003249.15_DBNDD1	420	417	408	368	294	342	327	322	194	198	192	181	241	237	228	248
ENSG00000003393.16_ALS2	560	596	487	526	380	392	432	414	490	514	402	420	487	481	536	555
ENSG00000003400.15_CASP10	48	70	51	63	57	61	63	54	131	121	122	135	198	200	188	195
ENSG00000003402.20_CFLAR	336	320	267	266	216	230	266	266	1577	1569	1343	1319	1275	1275	1422	1380
ENSG00000003436.16_TFPI	835	885	746	732	935	906	1008	1016	112	103	82	95	147	148	167	160
ENSG00000003509.16_NDUFAF7	180	172	156	146	129	149	152	160	232	228	187	193	225	202	237	240
ENSG00000003756.17_RBM5	884	890	759	797	667	667	716	740	1363	1302	1132	1193	1034	1035	1093	1101
ENSG00000003987.14_MTMR7	13	15	17	13	18	12	13	11	7	13	5	8	5	8	10	10
ENSG00000003989.18_SLC7A2	723	723	625	628	790	804	866	874	239	247	195	195	122	137	159	151
ENSG00000004059.11_ARF5	1019	1019	963	960	991	1025	1048	989	819	849	749	770	1032	993	1031	1058
ENSG00000004139.14_SARM1	88	70	82	74	69	64	66	56	199	189	160	139	140	155	181	173
ENSG00000004142.12_POLDIP2	1236	1282	1209	1126	1115	1129	1141	1158	578	557	536	505	705	683	762	662
ENSG00000004399.13_PLXND1	1069	1040	1022	951	1015	990	1010	1035	268	221	211	207	205	222	228	237
ENSG00000004455.17_AK2	2323	2306	2123	2092	2061	2115	2154	2217	1277	1355	1267	1199	1600	1558	1646	1530
ENSG00000004468.13_CD38	0	0	0	0	0	0	0	0	0	0	1	0	1	1	1	2
ENSG00000004478.8_FKBP4	4977	4919	4786	4689	4020	4005	3921	3957	788	859	762	744	1149	1175	1186	1218
ENSG00000004487.17_KDM1A	1820	1907	1706	1741	1418	1393	1439	1437	1345	1372	1223	1178	1391	1351	1447	1439
ENSG00000004534.15_RBM6	1092	1010	952	926	690	667	741	710	1036	1094	892	939	789	821	871	868
ENSG00000004660.15_CAMKK1	91	108	101	94	86	110	97	94	282	303	258	248	189	198	191	224
ENSG00000004700.16_RECQL	1660	1637	1529	1457	1370	1395	1418	1489	399	406	328	345	480	506	529	554
ENSG00000004766.17_VPS50	311	317	287	301	290	294	303	291	129	141	106	112	160	175	199	177
ENSG00000004776.13_HSPB6	1	3	0	0	1	0	0	1	4	4	3	2	3	5	1	7
ENSG00000004777.18_ARHGAP33	129	127	124	112	121	90	106	112	163	155	140	161	147	121	121	135
ENSG00000004779.10_NDUFAB1	532	531	556	542	582	588	532	552	244	262	239	241	438	372	403	420
ENSG00000004799.8_PDK4	18	13	16	11	11	9	14	6	28	29	21	26	19	16	17	21
ENSG00000004809.14_SLC22A16	0	0	0	0	0	0	0	0	0	0	0	2	0	0	0	1
ENSG00000004838.14_ZMYND10	9	9	9	14	12	10	10	8	13	12	5	3	3	5	15	9
ENSG00000004846.17_ABCB5	0	0	0	0	0	0	0	0	0	0	0	0	0	0	0	0
ENSG00000004848.8_ARX	5	12	9	8	3	5	1	6	24	24	32	21	31	28	30	21
ENSG00000004864.14_SLC25A13	434	451	446	405	455	497	425	526	306	308	249	268	287	287	322	309
ENSG00000004866.22_ST7	574	587	558	527	677	647	675	684	154	150	131	140	193	185	195	203
ENSG00000004897.12_CDC27	998	1074	949	950	875	844	892	892	548	633	493	451	746	692	802	829
ENSG00000004939.16_SLC4A1	0	0	0	0	0	0	0	0	5	4	5	7	3	3	2	0
ENSG00000004948.16_CALCR	0	0	0	0	0	1	0	0	0	0	0	0	0	0	0	0
ENSG00000004961.15_HCCS	358	379	301	308	380	321	384	416	225	226	195	202	340	291	325	346
ENSG00000004975.12_DVL2	1224	1190	1165	1158	878	929	857	891	807	758	711	705	733	764	746	789
ENSG00000005001.10_PRSS22	490	507	457	466	532	522	538	549	2167	2227	2017	1991	2515	2559	2639	2575
ENSG00000005007.13_UPF1	2463	2494	2277	2199	1679	1797	1858	1806	1949	1909	1707	1742	1956	1891	1992	2010
ENSG00000005020.13_SKAP2	299	296	320	300	310	288	269	274	259	299	227	248	356	375	425	369
ENSG00000005022.6_SLC25A5	3547	3678	3306	3415	3793	3804	3912	3895	1691	1658	1511	1493	2596	2546	2735	2667
ENSG00000005059.16_MCUB	401	354	370	340	361	370	351	390	176	179	162	176	283	293	280	305
ENSG00000005073.6_HOXA11	200	172	168	153	108	121	125	132	622	619	523	585	630	619	669	634
ENSG00000005075.15_POLR2J	1178	1185	1061	1069	843	903	949	894	370	382	340	344	500	496	500	532
ENSG00000005100.13_DHX33	1190	1229	1053	1079	793	799	879	857	494	485	421	392	438	488	531	501
ENSG00000005102.14_MEOX1	0	0	0	0	0	0	0	0	0	0	0	0	0	0	0	0
ENSG00000005108.16_THSD7A	0	0	0	0	0	0	0	0	0	0	0	1	1	0	1	1
ENSG00000005156.12_LIG3	468	448	427	429	368	358	344	391	508	485	368	439	498	478	546	560
ENSG00000005175.10_RPAP3	904	876	820	827	658	679	662	705	487	534	454	443	572	549	583	605
ENSG00000005187.12_ACSM3	7	1	6	3	4	2	5	1	30	26	27	26	37	36	35	40
ENSG00000005189.20_REXO5	84	73	85	80	76	73	72	60	72	76	55	53	90	84	102	106
ENSG00000005194.15_CIAPIN1	863	797	752	768	707	724	746	743	274	271	193	244	384	415	433	462
ENSG00000005206.17_SPPL2B	568	550	493	492	455	473	496	510	2358	2527	2092	2093	1309	1264	1388	1410
ENSG00000005238.20_FAM214B	103	109	93	94	77	73	82	81	107	137	105	96	119	103	129	121
ENSG00000005243.10_COPZ2	37	28	21	20	32	28	40	42	9	14	20	17	27	17	18	10
ENSG00000005249.13_PRKAR2B	0	0	0	0	0	0	1	0	24	23	21	25	21	26	26	20
ENSG00000005302.19_MSL3	364	376	345	333	295	305	305	316	241	204	174	184	169	156	179	200
ENSG00000005339.15_CREBBP	876	856	739	738	448	488	531	548	1154	1130	894	932	1042	1052	1183	1230
ENSG00000005379.17_TSPOAP1	1	0	0	0	1	0	0	0	768	783	657	721	428	404	457	393
ENSG00000005381.8_MPO	0	0	0	0	0	0	0	0	0	0	1	0	0	1	1	2
ENSG00000005421.9_PON1	0	0	1	0	0	0	0	0	0	1	3	1	1	1	0	0
ENSG00000005436.14_GCFC2	339	353	335	315	275	281	253	306	81	88	77	88	81	93	72	94
ENSG00000005448.17_WDR54	300	282	266	286	352	351	355	359	103	102	94	96	133	147	141	145
ENSG00000005469.12_CROT	79	57	71	89	93	99	84	79	57	52	43	27	41	37	55	57
ENSG00000005471.19_ABCB4	3	1	0	1	0	1	4	1	11	12	12	12	13	8	6	10
ENSG00000005483.21_KMT2E	965	907	852	864	647	645	679	655	671	725	548	570	520	576	633	642
ENSG00000005486.17_RHBDD2	978	972	845	781	1217	1248	1353	1398	1611	1587	1475	1474	1813	1863	1875	1867
ENSG00000005513.10_SOX8	328	364	313	295	233	217	251	242	0	0	1	1	4	1	0	4
ENSG00000005700.15_IBTK	555	529	485	495	405	452	454	449	658	676	548	547	644	698	759	746
ENSG00000005801.18_ZNF195	253	263	273	268	251	246	230	212	315	271	234	240	255	280	307	303
ENSG00000005810.19_MYCBP2	1125	1172	1024	1015	626	654	667	717	642	661	481	512	471	484	592	581
ENSG00000005812.11_FBXL3	413	406	393	392	371	379	382	360	262	284	214	218	312	316	383	337
ENSG00000005844.19_ITGAL	0	0	0	0	0	0	0	0	0	0	0	0	0	0	0	0
ENSG00000005882.12_PDK2	116	133	98	122	103	102	109	115	62	55	43	48	50	55	69	55
ENSG00000005884.18_ITGA3	1185	1209	1038	1016	1204	1197	1328	1322	12254	12131	10535	10437	13784	13749	14837	14846
ENSG00000005889.16_ZFX	382	359	318	337	258	273	287	288	212	215	187	177	254	238	279	255
ENSG00000005893.16_LAMP2	1076	1060	1041	1007	1438	1421	1452	1440	1732	1713	1452	1407	2021	2008	2253	2207
ENSG00000005961.19_ITGA2B	0	0	0	0	5	7	9	0	13	10	8	7	4	6	6	8
ENSG00000005981.13_ASB4	0	0	0	0	0	0	0	0	1	3	0	0	5	4	7	4
ENSG00000006007.12_GDE1	1033	1066	987	952	1202	1209	1218	1281	1080	1088	907	940	1377	1336	1468	1477
ENSG00000006015.18_REX1BD	240	254	208	216	179	160	203	179	389	420	345	325	305	289	314	357
ENSG00000006016.12_CRLF1	10	6	14	3	4	7	3	4	1	0	0	0	0	0	0	1
ENSG00000006025.12_OSBPL7	230	240	231	222	203	213	191	216	777	761	735	676	542	524	519	533
ENSG00000006042.12_TMEM98	718	760	688	652	859	854	916	888	234	220	195	207	282	259	294	276
ENSG00000006047.13_YBX2	0	0	2	1	1	1	1	1	89	85	97	71	60	51	45	53
ENSG00000006059.4_KRT33A	0	0	0	0	0	0	0	0	0	0	0	0	0	0	0	0
ENSG00000006062.18_MAP3K14	91	95	81	76	75	72	73	92	616	630	507	505	563	563	620	660
ENSG00000006071.16_ABCC8	0	0	0	0	0	0	0	0	0	0	0	0	0	0	0	0
ENSG00000006116.4_CACNG3	0	0	0	0	0	0	0	0	0	0	0	0	0	0	0	0
ENSG00000006118.15_TMEM132A	1249	1152	1142	1114	1264	1223	1275	1255	1192	1171	1099	1080	949	971	970	937
ENSG00000006125.18_AP2B1	2587	2688	2379	2440	2099	2109	2193	2184	2742	2813	2294	2286	3623	3646	4004	4049
ENSG00000006128.12_TAC1	0	0	0	0	0	0	0	0	0	0	0	0	0	0	0	0
ENSG00000006194.10_ZNF263	447	471	458	445	379	342	339	342	436	453	364	392	375	406	415	438
ENSG00000006210.7_CX3CL1	0	0	0	0	0	0	0	0	466	452	390	395	295	305	311	342
ENSG00000006282.21_SPATA20	808	849	743	712	687	660	754	711	2596	2625	2260	2293	1705	1751	1825	1836
ENSG00000006283.18_CACNA1G	0	0	0	0	0	0	0	0	8	8	9	12	5	9	2	5
ENSG00000006327.14_TNFRSF12A	7244	7287	6961	6830	7850	7659	7877	7768	3532	3529	3302	3391	4186	4120	4096	4165
ENSG00000006377.11_DLX6	0	0	0	0	0	0	0	0	52	45	33	45	43	43	52	48
ENSG00000006432.16_MAP3K9	268	298	261	242	180	167	181	194	638	680	492	506	565	614	731	693
ENSG00000006451.8_RALA	414	408	401	406	382	391	376	371	395	386	372	352	541	497	524	535
ENSG00000006453.14_BAIAP2L1	412	454	398	405	310	329	324	327	1224	1193	1083	961	1364	1287	1443	1452
ENSG00000006459.11_KDM7A	165	156	116	148	92	94	123	101	935	960	745	717	644	633	767	798
ENSG00000006468.14_ETV1	134	108	118	103	77	92	84	92	63	60	44	53	50	68	66	72
ENSG00000006530.18_AGK	554	545	511	489	454	453	484	465	243	264	216	206	225	230	251	255
ENSG00000006534.16_ALDH3B1	2	2	3	1	2	5	0	1	320	318	265	277	331	340	382	350
ENSG00000006555.11_TTC22	0	0	0	0	0	0	0	0	1	1	2	0	1	0	3	2
ENSG00000006576.16_PHTF2	340	329	337	321	514	436	470	476	354	376	337	345	595	591	598	619
ENSG00000006606.9_CCL26	0	0	0	0	0	0	0	0	27	29	32	37	70	62	62	57
ENSG00000006607.14_FARP2	109	84	78	89	63	60	66	70	154	159	145	117	109	126	138	122
ENSG00000006611.17_USH1C	0	0	2	2	1	0	0	0	4	6	4	4	4	1	3	5
ENSG00000006625.18_GGCT	567	570	497	549	395	416	410	423	356	313	276	282	317	336	375	349
ENSG00000006634.8_DBF4	308	315	298	300	272	257	256	260	152	153	153	129	189	190	191	195
ENSG00000006638.13_TBXA2R	37	40	35	36	37	41	42	37	0	0	3	2	5	4	1	1
ENSG00000006652.15_IFRD1	332	325	336	307	303	310	302	288	443	404	372	352	464	455	485	510
ENSG00000006659.13_LGALS14	0	0	0	0	0	0	0	0	0	0	0	0	0	0	0	0
ENSG00000006695.12_COX10	320	298	255	250	164	196	215	222	156	173	174	148	195	184	186	178
ENSG00000006704.11_GTF2IRD1	542	540	432	451	342	343	400	423	819	823	708	786	666	736	700	721
ENSG00000006712.15_PAF1	959	1002	912	857	584	608	652	605	706	767	608	636	751	804	821	880
ENSG00000006715.16_VPS41	365	339	329	290	227	255	261	265	381	335	307	327	404	359	416	386
ENSG00000006740.17_ARHGAP44	202	208	172	170	142	133	174	146	201	194	161	192	204	180	185	214
ENSG00000006744.19_ELAC2	1897	1897	1782	1736	1626	1640	1658	1687	1320	1313	1156	1186	1306	1278	1330	1371
ENSG00000006747.15_SCIN	0	0	0	0	0	0	0	0	31	43	29	38	20	25	25	20
ENSG00000006756.16_ARSD	245	279	248	234	296	287	309	298	1196	1168	1059	993	1001	1049	1075	1115
ENSG00000006757.12_PNPLA4	118	133	121	119	139	137	128	149	128	131	129	116	190	217	203	212
ENSG00000006788.14_MYH13	0	0	0	0	0	0	0	0	0	0	0	0	0	8	6	7
ENSG00000006831.10_ADIPOR2	2098	2077	1949	1905	2077	2101	2100	2218	1188	1187	984	995	1264	1211	1380	1361
ENSG00000006837.12_CDKL3	6	6	9	2	3	5	3	6	6	13	5	11	23	18	14	31
ENSG00000007001.13_UPP2	0	0	0	0	0	0	0	0	0	0	0	0	0	0	0	0
ENSG00000007038.11_PRSS21	0	0	0	0	0	0	0	0	0	0	0	0	0	0	0	0
ENSG00000007047.15_MARK4	594	570	529	540	387	372	392	388	404	338	341	319	401	471	447	470
ENSG00000007062.12_PROM1	0	0	0	0	11	14	14	1	41	56	47	52	54	61	66	40
ENSG00000007080.11_CCDC124	2432	2383	2273	2244	1662	1608	1624	1638	820	827	765	802	970	967	970	951
ENSG00000007129.18_CEACAM21	0	0	0	0	0	0	0	0	0	0	0	0	0	1	0	1
ENSG00000007168.14_PAFAH1B1	1298	1279	1173	1205	944	965	999	960	1038	975	853	912	1220	1186	1246	1310
ENSG00000007171.18_NOS2	0	1	0	0	0	0	0	0	27	37	20	26	15	21	26	25
ENSG00000007174.18_DNAH9	0	0	0	0	0	0	0	0	1	1	0	0	1	1	0	0
ENSG00000007202.15_KIAA0100	3843	3732	3357	3399	3457	3298	3523	3694	2637	2741	2315	2263	2518	2582	2738	2817
ENSG00000007216.15_SLC13A2	0	0	0	0	0	0	0	0	0	0	0	0	0	0	0	0
ENSG00000007237.19_GAS7	1	2	0	3	0	0	0	0	100	100	86	82	78	96	104	90
ENSG00000007255.10_TRAPPC6A	20	15	16	16	14	14	17	10	245	262	233	230	247	246	249	253
ENSG00000007264.15_MATK	3	1	2	2	0	0	2	0	1	0	0	1	0	0	1	0
ENSG00000007306.15_CEACAM7	0	0	0	0	0	0	0	0	1	0	0	0	2	1	0	1
ENSG00000007312.13_CD79B	0	0	0	0	0	0	0	0	0	0	0	0	0	0	0	0
ENSG00000007314.12_SCN4A	3	0	2	2	0	1	1	2	0	0	0	0	0	1	0	0
ENSG00000007341.19_ST7L	179	168	157	167	195	203	223	186	233	201	206	201	227	253	230	248
ENSG00000007350.17_TKTL1	0	0	0	0	0	0	0	0	0	0	0	0	0	0	0	0
ENSG00000007372.24_PAX6	0	0	0	0	0	0	0	0	20	19	22	20	18	21	13	17
ENSG00000007376.8_RPUSD1	1102	1151	1058	1042	899	952	935	947	383	361	350	378	368	363	331	360
ENSG00000007384.15_RHBDF1	552	602	454	506	495	502	547	594	1332	1346	1166	1195	1121	1123	1144	1212
ENSG00000007392.17_LUC7L	586	538	523	518	456	504	506	478	715	825	711	688	468	473	461	471
ENSG00000007402.12_CACNA2D2	9	13	15	15	13	10	8	6	42	35	28	41	35	44	37	45
ENSG00000007516.14_BAIAP3	22	16	19	14	12	10	15	10	167	192	154	158	82	82	79	96
ENSG00000007520.4_TSR3	825	849	762	782	615	592	630	607	500	505	436	452	480	500	541	489
ENSG00000007541.17_PIGQ	834	768	766	739	827	820	825	851	806	784	713	742	705	660	686	689
ENSG00000007545.16_CRAMP1	533	544	495	490	346	386	364	392	429	424	346	359	349	340	376	398
ENSG00000007866.22_TEAD3	366	389	329	331	255	290	298	299	540	527	456	483	528	557	598	547
ENSG00000007908.16_SELE	0	0	0	0	0	0	0	0	0	0	0	0	0	0	0	0
ENSG00000007923.16_DNAJC11	1361	1375	1273	1175	912	884	972	944	808	781	683	688	732	711	786	765
ENSG00000007933.13_FMO3	0	0	0	0	0	0	0	0	0	0	0	0	0	0	0	0
ENSG00000007944.15_MYLIP	116	116	97	102	72	75	75	92	515	524	471	450	418	444	426	475
ENSG00000007952.18_NOX1	0	0	1	0	0	0	0	1	62	61	63	66	196	215	214	203
ENSG00000007968.7_E2F2	313	317	299	309	248	235	232	235	149	148	118	120	96	100	119	111
ENSG00000008018.9_PSMB1	1286	1311	1287	1237	1295	1323	1304	1265	1410	1345	1344	1349	2196	2172	2188	2159
ENSG00000008056.14_SYN1	2	3	0	4	2	2	0	1	1	0	0	0	0	0	1	0
ENSG00000008083.14_JARID2	269	275	228	222	171	163	198	197	287	282	266	248	293	273	293	290
ENSG00000008086.13_CDKL5	66	83	54	61	40	34	52	45	31	41	31	20	36	40	44	51
ENSG00000008118.10_CAMK1G	0	0	3	0	0	1	0	0	0	3	1	4	1	1	1	1
ENSG00000008128.23_CDK11A	915	932	860	878	753	736	745	750	1367	1331	1250	1159	1148	1083	1143	1168
ENSG00000008130.15_NADK	890	944	817	815	651	683	724	710	953	969	867	803	721	752	794	777
ENSG00000008196.13_TFAP2B	0	0	0	0	0	0	0	0	0	0	0	0	0	0	0	0
ENSG00000008197.5_TFAP2D	0	0	0	0	0	0	0	0	0	0	0	0	0	0	0	0
ENSG00000008226.20_DLEC1	2	0	4	2	5	6	0	5	22	18	10	21	8	11	12	12
ENSG00000008256.16_CYTH3	297	245	229	235	151	174	189	181	874	926	793	783	1128	1079	1148	1198
ENSG00000008277.15_ADAM22	174	142	149	139	149	132	147	148	139	134	102	113	85	86	100	104
ENSG00000008282.9_SYPL1	1408	1330	1373	1382	2330	2337	2292	2336	966	948	818	841	1222	1220	1301	1317
ENSG00000008283.16_CYB561	921	957	892	897	1146	1151	1149	1176	1041	993	876	854	839	875	906	963
ENSG00000008294.21_SPAG9	850	843	759	707	540	534	599	600	1262	1178	998	992	1140	1195	1314	1326
ENSG00000008300.17_CELSR3	123	126	132	117	125	119	115	116	433	408	359	347	311	314	330	364
ENSG00000008311.16_AASS	1877	1761	1621	1688	1806	1915	1948	1953	226	230	182	185	300	290	340	325
ENSG00000008323.16_PLEKHG6	2	2	0	0	1	1	3	0	486	475	413	422	457	444	458	506
ENSG00000008324.12_SS18L2	188	183	197	176	209	205	187	208	77	70	51	47	98	89	129	106
ENSG00000008382.16_MPND	148	181	141	146	99	116	111	125	243	257	203	223	181	229	216	232
ENSG00000008394.13_MGST1	3119	3132	3143	3274	5118	5035	4992	4965	387	349	379	386	661	660	637	639
ENSG00000008405.12_CRY1	730	749	708	690	553	563	542	567	260	223	205	202	281	257	294	296
ENSG00000008438.5_PGLYRP1	2	6	1	1	2	2	3	5	7	5	3	8	4	0	1	1
ENSG00000008441.18_NFIX	827	882	776	729	573	568	643	601	438	463	399	382	520	483	553	522
ENSG00000008513.16_ST3GAL1	988	987	887	918	1013	1009	1070	1040	189	206	154	172	175	157	172	202
ENSG00000008516.18_MMP25	54	52	62	69	81	79	73	57	79	88	63	65	39	43	63	45
ENSG00000008517.19_IL32	1943	1914	1738	1742	1635	1708	1719	1811	26	33	19	15	64	60	68	85
ENSG00000008710.20_PKD1	1789	1823	1623	1555	1283	1252	1369	1394	4155	4267	3487	3352	2381	2279	2774	2711
ENSG00000008735.14_MAPK8IP2	23	21	23	25	31	26	32	20	17	14	14	14	46	37	47	42
ENSG00000008838.20_MED24	1433	1454	1258	1266	1082	1077	1204	1163	946	939	828	753	911	878	974	1001
ENSG00000008853.17_RHOBTB2	377	401	324	364	278	239	265	296	543	504	427	455	438	469	473	524
ENSG00000008869.12_HEATR5B	347	387	330	315	297	312	329	332	633	613	499	514	475	445	573	486
ENSG00000008952.17_SEC62	2650	2674	2457	2508	3208	3290	3341	3352	1692	1606	1486	1482	1841	1895	1962	1919
ENSG00000008988.11_RPS20	11232	10987	11080	10989	11211	11300	11063	10992	4543	4705	4458	4575	6186	6183	6054	6130
ENSG00000009307.16_CSDE1	4845	4838	4196	4305	3597	3654	3960	3947	5050	5009	4178	4212	5615	5633	6259	6158
ENSG00000009335.18_UBE3C	1508	1643	1458	1497	1219	1216	1211	1238	789	763	662	670	990	1010	1049	1108
ENSG00000009413.16_REV3L	336	313	279	283	200	219	232	235	300	266	219	234	272	269	295	327
ENSG00000009694.13_TENM1	0	0	0	0	0	0	0	0	0	0	0	0	0	0	1	0
ENSG00000009709.12_PAX7	0	0	0	0	0	0	0	0	0	0	0	0	0	0	0	0
ENSG00000009724.17_MASP2	25	22	19	25	12	20	16	16	28	40	32	28	21	30	31	20
ENSG00000009765.15_IYD	0	0	0	0	0	0	0	0	0	0	0	1	0	0	0	0
ENSG00000009780.16_FAM76A	68	88	67	59	58	66	73	75	62	46	53	45	72	66	72	70
ENSG00000009790.15_TRAF3IP3	0	0	0	0	0	0	0	0	0	0	0	0	0	0	0	0
ENSG00000009830.13_POMT2	339	349	340	289	321	372	365	359	413	403	366	351	373	347	383	377
ENSG00000009844.16_VTA1	305	351	298	317	339	320	329	342	349	312	272	287	482	479	480	566
ENSG00000009950.16_MLXIPL	3	0	1	2	1	3	1	2	710	690	604	587	401	377	420	435
ENSG00000009954.11_BAZ1B	3479	3486	3228	3210	2258	2282	2289	2333	1656	1687	1431	1382	1542	1576	1701	1732
ENSG00000010017.13_RANBP9	544	585	525	504	413	428	436	439	591	609	495	559	756	767	794	822
ENSG00000010030.14_ETV7	0	1	0	0	0	2	0	0	23	22	27	23	29	45	34	33
ENSG00000010072.16_SPRTN	205	172	190	204	179	169	144	165	134	125	107	109	148	142	169	152
ENSG00000010165.20_EEF1AKNMT	963	967	856	901	766	717	809	738	439	513	413	430	501	492	513	529
ENSG00000010219.13_DYRK4	114	123	107	122	103	95	92	103	111	97	88	111	116	118	104	125
ENSG00000010244.19_ZNF207	2004	1974	1892	1857	1830	1902	1873	1896	1438	1539	1248	1277	1529	1544	1605	1748
ENSG00000010256.11_UQCRC1	2212	2139	2079	2138	2186	2250	2239	2131	1431	1452	1273	1240	1749	1792	1915	1865
ENSG00000010270.14_STARD3NL	406	446	431	424	584	639	598	603	166	184	172	174	255	271	266	251
ENSG00000010278.15_CD9	2455	2426	2213	2181	3507	3518	3645	3794	6413	6435	5569	5655	8712	8890	9339	9438
ENSG00000010282.15_HHATL	0	0	0	0	0	0	0	0	0	0	0	0	0	1	0	0
ENSG00000010292.13_NCAPD2	3958	3942	3503	3547	2785	2755	2972	2955	1470	1425	1189	1206	1588	1628	1727	1846
ENSG00000010295.20_IFFO1	1	4	0	4	4	1	3	1	3	5	4	1	3	4	3	4
ENSG00000010310.9_GIPR	58	69	55	54	38	40	40	46	292	315	256	284	232	207	234	220
ENSG00000010318.21_PHF7	34	25	14	22	9	13	16	25	32	35	34	41	39	36	20	39
ENSG00000010319.7_SEMA3G	0	0	0	0	0	0	0	0	102	70	78	82	73	86	74	84
ENSG00000010322.16_NISCH	1168	1148	1053	1076	1003	943	957	1055	2126	2082	1782	1895	1348	1285	1430	1348
ENSG00000010327.10_STAB1	1	0	1	0	2	1	0	0	13	12	14	12	9	12	5	11
ENSG00000010361.14_FUZ	0	0	2	0	1	1	0	0	41	58	50	35	47	54	47	59
ENSG00000010379.16_SLC6A13	0	0	1	2	4	1	0	1	2	6	3	3	2	4	3	3
ENSG00000010404.18_IDS	589	586	501	517	471	497	546	521	549	493	408	401	763	820	901	903
ENSG00000010438.17_PRSS3	173	182	179	155	158	159	154	165	282	305	237	229	433	450	509	487
ENSG00000010539.12_ZNF200	146	142	160	121	129	148	138	131	159	135	127	131	151	149	170	147
ENSG00000010610.10_CD4	7	3	4	1	4	0	6	4	0	0	0	0	0	0	0	0
ENSG00000010626.15_LRRC23	37	29	23	24	17	13	19	26	79	62	64	51	70	70	86	71
ENSG00000010671.16_BTK	0	0	0	0	0	0	0	0	0	0	0	0	0	1	4	0
ENSG00000010704.19_HFE	179	173	126	138	246	243	292	283	390	380	353	349	508	501	546	498
ENSG00000010803.16_SCMH1	375	351	352	331	265	263	283	247	261	268	260	254	259	273	258	252
ENSG00000010810.17_FYN	287	308	261	241	209	190	221	238	760	751	601	641	855	852	931	974
ENSG00000010818.10_HIVEP2	564	531	478	461	249	255	296	288	522	480	404	380	382	391	440	481
ENSG00000010932.17_FMO1	0	0	0	0	0	0	0	0	0	0	0	0	0	0	0	0
ENSG00000011007.12_ELOA	149	148	124	112	104	119	124	146	496	501	445	428	583	552	579	628
ENSG00000011009.11_LYPLA2	1090	1138	1004	1021	824	834	876	860	617	616	525	513	657	667	731	722
ENSG00000011021.23_CLCN6	720	708	643	646	562	595	616	606	703	727	623	638	697	690	741	720
ENSG00000011028.14_MRC2	1	0	0	0	0	0	1	0	31	32	27	28	24	16	21	20
ENSG00000011052.21_NME1-NME2	225	200	145	214	170	183	202	196	143	145	132	111	196	180	204	207
ENSG00000011083.9_SLC6A7	0	1	0	0	0	0	0	0	7	13	12	5	7	3	5	5
ENSG00000011105.14_TSPAN9	727	708	631	710	843	841	874	857	406	413	348	356	402	392	428	428
ENSG00000011114.15_BTBD7	362	356	354	291	266	241	262	276	380	347	295	269	355	323	415	385
ENSG00000011132.12_APBA3	174	194	167	177	138	133	139	135	254	224	227	236	280	309	280	296
ENSG00000011143.19_MKS1	196	233	174	198	160	171	188	179	155	141	116	135	163	145	152	186
ENSG00000011198.10_ABHD5	186	192	184	187	258	267	254	269	188	163	139	169	226	217	249	218
ENSG00000011201.12_ANOS1	0	0	0	0	0	0	0	0	0	0	0	0	0	0	0	0
ENSG00000011243.19_AKAP8L	972	937	764	872	642	636	693	751	1717	1895	1612	1607	1550	1632	1625	1680
ENSG00000011258.16_MBTD1	210	197	195	214	189	179	167	177	217	201	166	181	172	173	196	189
ENSG00000011260.14_UTP18	743	739	669	664	636	603	663	651	331	332	298	341	436	460	435	453
ENSG00000011275.19_RNF216	837	853	805	815	599	637	582	619	556	506	462	458	529	539	581	564
ENSG00000011295.16_TTC19	604	605	593	620	654	599	576	616	1187	1284	1105	1061	1391	1387	1471	1479
ENSG00000011304.22_PTBP1	7912	7517	7056	6854	5596	5404	5792	5825	4840	4851	4196	4373	5341	5512	5753	5687
ENSG00000011332.21_DPF1	122	94	94	74	59	77	82	91	13	18	13	17	21	22	24	19
ENSG00000011347.10_SYT7	67	59	48	61	40	51	54	50	1557	1504	1329	1382	1208	1200	1222	1287
ENSG00000011376.12_LARS2	897	863	750	815	703	692	754	743	560	532	451	471	603	578	641	651
ENSG00000011405.13_PIK3C2A	841	868	776	739	496	503	530	552	762	773	620	566	696	679	795	837
ENSG00000011422.12_PLAUR	1648	1611	1529	1578	1766	1722	1720	1784	423	435	373	420	496	504	510	506
ENSG00000011426.11_ANLN	1754	1796	1568	1656	1312	1313	1415	1332	1189	1177	949	1018	1406	1346	1496	1548
ENSG00000011451.21_WIZ	912	880	784	800	608	624	650	684	764	762	662	686	759	745	805	776
ENSG00000011454.18_RABGAP1	707	686	626	635	395	416	441	410	631	669	539	541	566	595	647	647
ENSG00000011465.18_DCN	0	0	0	0	0	0	0	0	0	0	0	0	0	0	2	0
ENSG00000011478.13_QPCTL	240	238	217	231	301	302	284	338	372	373	349	331	539	558	576	563
ENSG00000011485.15_PPP5C	1175	1091	975	1011	800	813	911	854	964	989	931	920	1061	1057	1023	1071
ENSG00000011523.14_CEP68	106	128	110	109	80	61	71	69	235	252	223	225	290	291	306	288
ENSG00000011566.15_MAP4K3	239	257	236	214	160	174	171	179	291	301	273	265	331	359	359	352
ENSG00000011590.14_ZBTB32	11	3	5	4	5	1	3	7	3	4	0	3	1	0	1	1
ENSG00000011600.12_TYROBP	0	0	0	0	0	0	0	0	0	0	1	0	0	1	0	1
ENSG00000011638.11_TMEM159	225	214	213	198	248	234	235	259	342	354	302	331	615	620	612	680
ENSG00000011677.13_GABRA3	0	0	0	0	0	0	0	0	0	0	1	0	0	0	0	0
ENSG00000012048.23_BRCA1	631	612	548	560	413	401	433	440	372	379	302	340	307	303	315	348
ENSG00000012061.16_ERCC1	4798	4752	4426	4571	3856	3880	3833	3922	473	436	388	430	541	537	564	558
ENSG00000012124.17_CD22	0	0	1	0	0	0	1	2	36	37	32	38	92	98	94	104
ENSG00000012171.20_SEMA3B	23	23	17	19	25	16	24	23	4782	4857	4246	4371	3999	4068	4083	4255
ENSG00000012174.12_MBTPS2	310	282	263	275	420	427	445	447	451	444	374	378	469	500	544	521
ENSG00000012211.13_PRICKLE3	249	210	206	204	157	167	178	168	192	237	172	193	207	245	258	235
ENSG00000012223.13_LTF	0	0	0	0	0	0	0	0	6	8	3	3	9	11	18	10
ENSG00000012232.9_EXTL3	1266	1224	1120	1062	1238	1235	1345	1337	577	608	488	520	769	728	801	825
ENSG00000012504.15_NR1H4	0	0	0	0	0	0	0	0	0	0	0	0	0	0	0	0
ENSG00000012660.14_ELOVL5	0	0	0	0	1	0	5	6	0	1	3	2	3	4	1	0
ENSG00000012779.11_ALOX5	0	1	0	0	0	0	0	1	1	2	3	1	3	2	0	0
ENSG00000012817.16_KDM5D	0	1	0	0	0	0	0	0	767	801	653	633	568	582	607	704
ENSG00000012822.16_CALCOCO1	417	396	383	369	307	303	314	308	1320	1238	1175	1099	870	920	925	924
ENSG00000012963.15_UBR7	861	831	726	795	760	756	813	791	184	202	180	182	295	290	295	303
ENSG00000012983.12_MAP4K5	731	733	650	639	525	540	572	585	453	476	371	435	419	414	419	473
ENSG00000013016.16_EHD3	0	0	0	0	0	0	0	0	2	1	1	0	2	2	1	0
ENSG00000013275.8_PSMC4	1656	1615	1469	1387	1289	1275	1395	1413	825	796	656	722	1338	1201	1369	1385
ENSG00000013288.9_MAN2B2	824	731	692	669	728	727	797	786	1219	1277	1050	1060	1025	1090	1146	1176
ENSG00000013293.6_SLC7A14	0	0	0	0	0	0	0	0	0	0	0	0	0	0	0	0
ENSG00000013297.12_CLDN11	1	1	0	0	0	0	0	0	0	3	2	0	1	0	1	0
ENSG00000013306.16_SLC25A39	1717	1655	1515	1529	1395	1429	1498	1479	1208	1221	1098	1075	1370	1286	1387	1381
ENSG00000013364.19_MVP	24	24	16	16	22	14	17	32	2030	1951	1756	1766	2010	1957	2069	2099
ENSG00000013374.17_NUB1	847	876	750	797	627	609	643	670	907	896	767	773	929	924	1074	937
ENSG00000013375.16_PGM3	672	644	543	605	580	535	572	646	494	519	380	413	627	623	707	728
ENSG00000013392.8_RWDD2A	59	63	57	53	67	53	65	62	75	70	61	60	73	89	86	97
ENSG00000013441.16_CLK1	276	251	257	258	273	276	268	270	221	231	214	216	192	221	199	201
ENSG00000013503.10_POLR3B	156	118	127	135	138	140	143	135	112	102	97	102	136	127	120	147
ENSG00000013523.11_ANGEL1	622	619	572	614	772	732	759	759	538	552	444	476	475	483	531	522
ENSG00000013561.18_RNF14	212	218	187	172	199	199	219	232	177	173	147	152	264	268	274	301
ENSG00000013563.14_DNASE1L1	219	247	208	183	181	205	197	244	467	480	410	395	528	539	572	588
ENSG00000013573.17_DDX11	1985	1964	1750	1700	1353	1365	1513	1478	1154	1133	950	959	799	832	910	915
ENSG00000013583.10_HEBP1	421	387	407	401	335	350	304	332	314	333	338	295	488	476	475	479
ENSG00000013588.9_GPRC5A	43	38	44	39	53	49	49	49	6871	6707	5779	5691	10570	10540	11577	11401
ENSG00000013619.15_MAMLD1	0	1	0	0	0	0	1	1	38	31	26	23	47	45	62	47
ENSG00000013725.14_CD6	0	0	0	0	0	0	0	0	9	6	7	3	1	9	7	8
ENSG00000013810.21_TACC3	1558	1541	1410	1355	957	923	1009	1007	805	835	627	689	692	724	806	826
ENSG00000014123.10_UFL1	952	934	863	804	1159	1195	1251	1273	1080	1000	899	873	1066	1076	1196	1134
ENSG00000014138.9_POLA2	329	351	331	347	317	280	262	299	145	167	91	141	168	169	205	199
ENSG00000014164.7_ZC3H3	842	814	795	798	672	601	627	608	275	267	221	225	283	308	331	331
ENSG00000014216.16_CAPN1	2454	2430	2203	2265	2009	2007	2138	2035	2568	2625	2373	2434	3332	3408	3399	3489
ENSG00000014257.16_ACP3	0	0	0	0	0	0	0	0	58	73	55	56	73	80	87	81
ENSG00000014641.21_MDH1	765	776	795	766	915	938	918	857	882	842	768	675	1422	1445	1566	1570
ENSG00000014824.14_SLC30A9	627	704	609	681	630	637	610	632	694	744	584	598	762	791	871	865
ENSG00000014914.21_MTMR11	18	20	26	18	16	18	13	13	18	19	20	17	26	35	29	31
ENSG00000014919.13_COX15	546	540	537	516	536	528	539	507	449	437	343	373	512	528	560	613
ENSG00000015133.19_CCDC88C	518	499	473	401	268	258	292	309	301	316	256	311	224	256	234	243
ENSG00000015153.15_YAF2	190	194	185	182	192	210	190	212	52	65	48	52	83	68	89	76
ENSG00000015171.20_ZMYND11	738	715	641	645	483	461	504	520	596	598	440	526	606	561	645	685
ENSG00000015285.11_WAS	1	0	0	3	1	2	0	1	9	6	10	10	16	10	9	11
ENSG00000015413.9_DPEP1	0	0	0	2	0	0	0	0	4	6	3	5	1	0	2	1
ENSG00000015475.19_BID	486	486	477	499	462	406	403	406	257	241	244	224	323	298	314	315
ENSG00000015479.20_MATR3	2723	2689	2546	2569	2402	2373	2380	2410	1616	1563	1345	1320	1767	1783	1942	1961
ENSG00000015520.15_NPC1L1	0	0	0	1	0	0	0	0	3	0	0	0	3	0	2	3
ENSG00000015532.10_XYLT2	846	815	755	795	946	957	972	982	991	1029	885	880	962	895	1003	969
ENSG00000015568.13_RGPD5	533	388	411	458	494	333	441	489	708	872	737	785	890	868	954	758
ENSG00000015592.16_STMN4	0	0	0	0	0	0	1	2	0	0	1	0	0	0	0	1
ENSG00000015676.18_NUDCD3	557	601	602	538	520	484	497	460	790	791	684	705	839	833	895	876
ENSG00000016082.15_ISL1	6	8	6	4	6	3	8	3	4	4	5	1	4	5	5	4
ENSG00000016391.11_CHDH	360	364	353	295	246	220	256	240	277	290	253	289	195	204	181	189
ENSG00000016402.14_IL20RA	1	5	5	7	4	7	2	2	1160	1131	993	974	1127	1104	1176	1234
ENSG00000016490.16_CLCA1	0	0	0	0	0	0	0	0	0	0	0	0	0	0	0	0
ENSG00000016602.9_CLCA4	0	0	0	0	0	0	0	0	0	0	0	0	0	0	0	0
ENSG00000016864.19_GLT8D1	383	338	369	353	513	455	491	455	635	564	525	551	749	757	792	781
ENSG00000017260.20_ATP2C1	1648	1581	1429	1470	1900	1844	2030	1941	4526	4651	3890	3916	5376	5361	5846	5825
ENSG00000017427.17_IGF1	0	0	0	0	0	0	0	0	2	0	1	3	2	10	5	8
ENSG00000017483.15_SLC38A5	2026	2085	1970	1991	2934	2969	3015	2952	3	5	2	1	4	8	8	8
ENSG00000017797.13_RALBP1	1247	1274	1222	1173	867	835	833	833	1098	1096	983	952	1272	1298	1348	1369
ENSG00000018189.13_RUFY3	166	188	155	166	95	124	100	128	262	258	199	212	227	257	304	259
ENSG00000018236.15_CNTN1	0	0	0	0	0	0	0	0	0	0	0	0	0	0	0	0
ENSG00000018280.17_SLC11A1	5	5	9	1	4	6	5	4	7	5	5	3	5	12	12	10
ENSG00000018408.15_WWTR1	180	222	208	189	195	197	179	198	46	61	34	43	51	72	66	83
ENSG00000018510.18_AGPS	848	859	828	778	675	678	670	685	1134	1065	913	911	1197	1220	1368	1313
ENSG00000018607.7_ZNF806	0	0	0	0	0	0	0	0	0	0	0	0	0	0	0	0
ENSG00000018610.15_STEEP1	284	252	256	245	208	218	205	227	159	138	144	144	196	192	195	186
ENSG00000018625.15_ATP1A2	0	0	0	0	0	0	0	0	4	3	7	1	8	11	8	10
ENSG00000018699.13_TTC27	486	476	433	441	446	400	450	436	269	260	242	211	338	338	345	385
ENSG00000018869.17_ZNF582	0	0	1	3	0	0	2	0	0	0	0	0	0	0	0	0
ENSG00000019102.12_VSIG2	1	1	1	1	1	1	0	1	0	0	1	0	0	1	1	1
ENSG00000019144.19_PHLDB1	310	285	269	266	217	180	203	218	880	892	765	767	653	623	696	672
ENSG00000019169.11_MARCO	0	0	0	0	0	0	1	0	0	0	0	2	0	0	2	2
ENSG00000019186.10_CYP24A1	0	0	0	0	0	0	0	0	5	10	13	6	11	14	9	10
ENSG00000019485.14_PRDM11	60	56	51	61	42	46	43	41	125	93	85	99	91	100	109	101
ENSG00000019505.8_SYT13	0	0	0	0	0	0	0	0	9	10	7	9	29	39	28	44
ENSG00000019549.13_SNAI2	0	0	0	0	1	3	0	0	1	0	0	0	0	0	1	0
ENSG00000019582.16_CD74	1	0	0	1	0	0	0	2	5	1	2	2	0	0	3	2
ENSG00000019991.18_HGF	1815	1805	1538	1614	2974	2960	3127	3272	0	0	0	0	1	8	7	8
ENSG00000019995.6_ZRANB1	193	220	185	163	132	107	144	136	189	189	169	186	233	210	215	228
ENSG00000020129.16_NCDN	638	650	604	575	532	478	508	540	433	407	359	380	402	387	400	432
ENSG00000020181.18_ADGRA2	0	0	0	0	1	2	0	0	75	78	65	75	129	100	123	114
ENSG00000020219.9_CCT8L1P	0	0	0	0	0	0	0	0	0	0	0	0	0	0	0	1
ENSG00000020256.20_ZFP64	271	263	234	233	204	172	195	218	202	168	160	158	253	222	277	233
ENSG00000020426.11_MNAT1	298	295	277	296	215	209	201	203	176	166	156	153	220	206	217	225
ENSG00000020577.14_SAMD4A	681	639	566	618	429	390	429	443	762	770	617	588	690	626	770	775
ENSG00000020633.19_RUNX3	0	0	1	0	0	0	0	0	0	3	1	2	0	1	0	0
ENSG00000020922.13_MRE11	225	242	232	218	204	220	204	214	261	302	223	251	239	278	282	286
ENSG00000021300.14_PLEKHB1	3	0	1	1	0	0	0	1	96	96	101	85	102	84	83	94
ENSG00000021355.13_SERPINB1	240	224	230	199	222	223	227	232	770	765	698	732	1158	1112	1145	1180
ENSG00000021461.17_CYP3A43	0	0	0	0	0	0	0	0	0	0	0	0	0	0	0	0
ENSG00000021488.13_SLC7A9	0	0	0	0	0	0	1	1	1	1	1	0	0	1	1	4
ENSG00000021574.13_SPAST	301	336	304	265	344	346	369	366	437	436	343	379	451	464	502	519
ENSG00000021645.20_NRXN3	0	0	0	0	0	0	0	0	62	68	54	54	33	35	38	40
ENSG00000021762.20_OSBPL5	172	204	169	171	156	146	154	164	801	788	690	732	699	707	741	713
ENSG00000021776.11_AQR	591	619	550	531	454	503	506	515	367	356	268	285	420	398	456	501
ENSG00000021826.17_CPS1	51	49	41	48	118	110	131	112	1	2	1	3	40	25	30	39
ENSG00000021852.13_C8B	0	0	0	0	0	0	0	0	0	0	0	0	0	0	0	0
ENSG00000022267.19_FHL1	1	1	1	1	2	3	3	3	0	0	0	0	1	0	0	1
ENSG00000022277.13_RTF2	1237	1237	1146	1118	929	937	971	962	724	658	625	641	798	829	818	850
ENSG00000022355.18_GABRA1	0	0	0	0	0	0	0	0	0	0	0	0	0	0	0	0
ENSG00000022556.16_NLRP2	0	1	1	1	0	0	0	0	583	590	456	503	522	517	601	576
ENSG00000022567.10_SLC45A4	515	510	474	429	434	451	469	489	573	590	508	467	599	578	644	654
ENSG00000022840.17_RNF10	1576	1520	1367	1350	988	1024	1094	1111	1026	1070	894	912	1252	1243	1394	1294
ENSG00000022976.16_ZNF839	170	170	163	171	148	119	133	120	232	233	192	226	197	203	189	223
ENSG00000023041.12_ZDHHC6	453	444	395	457	488	531	522	507	318	293	271	266	292	299	315	309
ENSG00000023171.19_GRAMD1B	0	0	1	2	1	0	0	0	1	0	0	0	12	9	12	11
ENSG00000023191.17_RNH1	1209	1160	1113	1047	889	911	944	930	1468	1357	1352	1320	1731	1730	1744	1716
ENSG00000023228.14_NDUFS1	1157	1164	1097	1107	985	983	960	998	892	830	682	706	1022	1072	1185	1177
ENSG00000023287.13_RB1CC1	800	823	738	723	537	510	551	557	567	560	437	440	596	601	700	693
ENSG00000023318.8_ERP44	1614	1624	1534	1545	2287	2260	2313	2322	726	740	584	570	852	806	991	917
ENSG00000023330.15_ALAS1	1016	1020	952	949	850	858	868	865	724	672	613	633	819	890	907	883
ENSG00000023445.16_BIRC3	104	99	100	93	73	77	76	72	75	82	69	66	143	133	139	159
ENSG00000023516.9_AKAP11	603	633	541	539	468	471	525	504	699	711	553	553	741	737	828	887
ENSG00000023572.10_GLRX2	231	234	201	199	202	190	215	220	67	60	48	47	72	85	81	105
ENSG00000023608.5_SNAPC1	274	279	258	242	257	248	289	244	109	110	85	102	182	160	191	179
ENSG00000023697.13_DERA	355	313	287	307	357	379	409	377	133	161	140	128	210	224	232	220
ENSG00000023734.11_STRAP	3162	3037	2918	3046	2899	2917	2908	2833	1084	1084	943	968	1513	1523	1633	1587
ENSG00000023839.12_ABCC2	11	11	15	12	5	15	11	6	18	17	22	11	75	69	84	69
ENSG00000023892.11_DEF6	349	325	307	274	243	237	262	274	103	114	109	100	146	130	132	141
ENSG00000023902.14_PLEKHO1	354	335	330	339	227	212	197	215	8	20	16	14	15	22	17	16
ENSG00000023909.10_GCLM	544	512	511	513	468	496	473	469	206	207	173	176	262	288	304	294
ENSG00000024048.11_UBR2	636	667	578	538	486	490	545	551	647	633	528	480	575	602	687	687
ENSG00000024422.12_EHD2	172	172	154	138	113	123	127	142	74	81	59	66	106	109	118	125
ENSG00000024526.17_DEPDC1	612	550	520	524	483	456	501	495	303	283	211	221	369	355	417	442
ENSG00000024862.18_CCDC28A	119	116	109	93	94	96	99	115	121	124	122	115	144	156	151	143
ENSG00000025039.15_RRAGD	0	0	0	0	0	0	0	0	12	11	12	8	10	11	9	14
ENSG00000025156.13_HSF2	158	179	154	156	159	170	164	177	110	115	84	88	126	135	147	159
ENSG00000025293.17_PHF20	582	539	539	541	470	459	438	469	397	384	322	345	399	418	464	422
ENSG00000025423.11_HSD17B6	17	18	14	13	24	16	23	25	15	13	18	6	13	15	15	15
ENSG00000025434.19_NR1H3	31	19	29	26	22	17	11	19	124	116	112	132	166	155	148	155
ENSG00000025708.14_TYMP	97	110	102	114	79	92	63	85	12	15	6	8	7	7	13	14
ENSG00000025770.19_NCAPH2	819	861	729	798	620	714	684	711	421	434	391	367	383	410	429	400
ENSG00000025772.8_TOMM34	1950	1889	1792	1863	1618	1555	1586	1557	497	501	477	454	617	597	590	638
ENSG00000025796.14_SEC63	226	199	165	196	185	177	200	208	3179	3217	2739	2707	2887	2943	3164	3185
ENSG00000025800.14_KPNA6	1299	1378	1208	1199	1069	1047	1143	1099	1209	1125	967	943	1339	1303	1485	1470
ENSG00000026025.16_VIM	13	19	5	4	26	20	43	30	5	2	1	1	10	7	13	10
ENSG00000026036.22_RTEL1-TNFRSF6B	42	49	54	24	69	37	59	59	39	50	47	71	33	36	9	18
ENSG00000026103.22_FAS	346	344	296	315	496	473	526	513	87	88	83	73	105	121	125	112
ENSG00000026297.17_RNASET2	579	615	551	532	647	614	631	694	934	953	863	876	922	936	945	928
ENSG00000026508.20_CD44	1267	1214	1159	1120	1699	1669	1771	1745	762	816	675	666	590	569	656	614
ENSG00000026559.14_KCNG1	0	0	0	0	0	0	0	0	0	0	0	0	0	0	0	0
ENSG00000026652.15_AGPAT4	93	109	103	77	84	77	89	85	116	118	94	86	86	88	102	110
ENSG00000026751.17_SLAMF7	6	4	8	5	19	23	17	24	0	0	0	0	15	12	15	14
ENSG00000026950.17_BTN3A1	132	136	123	122	125	115	114	136	407	398	357	363	435	493	479	489
ENSG00000027001.10_MIPEP	311	321	282	267	336	330	378	349	134	151	126	129	163	146	163	159
ENSG00000027075.16_PRKCH	0	1	0	0	0	0	0	0	189	195	174	157	246	239	272	251
ENSG00000027644.5_INSRR	0	0	0	0	0	0	0	0	0	0	1	0	0	0	0	0
ENSG00000027697.15_IFNGR1	173	178	189	190	294	282	302	238	1462	1451	1221	1279	2215	2263	2414	2415
ENSG00000027847.14_B4GALT7	236	246	209	204	246	229	260	265	275	254	245	222	290	294	296	322
ENSG00000027869.12_SH2D2A	28	37	32	30	25	23	21	27	3	1	6	8	8	11	4	3
ENSG00000028116.18_VRK2	205	218	173	186	159	173	192	183	504	517	415	423	577	518	611	612
ENSG00000028137.19_TNFRSF1B	0	0	0	0	0	0	0	1	303	300	277	249	218	198	216	225
ENSG00000028203.18_VEZT	484	508	451	447	581	530	565	604	913	953	816	813	923	943	965	1020
ENSG00000028277.21_POU2F2	19	25	21	21	19	10	13	14	35	41	28	27	26	34	41	38
ENSG00000028310.18_BRD9	554	615	498	555	418	388	424	429	407	442	386	382	396	383	411	386
ENSG00000028528.15_SNX1	1146	1129	1121	1092	927	901	857	897	950	953	918	879	931	961	917	945
ENSG00000028839.10_TBPL1	124	130	129	123	113	118	110	112	117	114	82	90	161	170	198	188
ENSG00000029153.14_ARNTL2	1124	1154	1068	1060	917	879	888	928	215	234	180	180	310	339	371	357
ENSG00000029363.17_BCLAF1	2877	2836	2551	2500	2003	1994	2169	2162	1625	1690	1339	1320	1305	1351	1559	1520
ENSG00000029364.12_SLC39A9	649	665	585	653	841	838	847	871	787	836	635	624	1067	1086	1263	1211
ENSG00000029534.21_ANK1	0	0	0	0	0	0	0	0	1	3	1	3	0	0	0	0
ENSG00000029559.7_IBSP	0	0	0	0	0	0	0	0	0	0	0	0	0	0	0	0
ENSG00000029639.11_TFB1M	162	155	131	129	123	134	149	150	131	144	130	142	209	220	194	227
ENSG00000029725.17_RABEP1	910	940	823	873	662	625	711	617	495	484	415	415	461	477	502	523
ENSG00000029993.15_HMGB3	729	712	595	649	454	481	553	493	614	600	484	557	604	621	659	663
ENSG00000030066.13_NUP160	774	783	695	711	760	792	847	791	504	504	382	370	594	590	706	699
ENSG00000030110.13_BAK1	924	853	840	836	737	752	744	750	165	146	185	138	236	238	234	214
ENSG00000030304.14_MUSK	0	0	0	0	0	0	0	0	0	1	0	0	0	0	0	0
ENSG00000030419.17_IKZF2	1	0	2	1	0	0	2	3	50	43	39	36	40	31	42	40
ENSG00000030582.18_GRN	3670	3570	3281	3379	4432	4502	4668	4634	4083	3945	3545	3514	3999	3946	4117	4279
ENSG00000031003.10_FAM13B	273	329	310	279	223	237	219	215	156	153	116	128	154	163	165	200
ENSG00000031081.11_ARHGAP31	568	647	519	553	325	327	366	349	154	161	141	121	176	175	222	166
ENSG00000031691.7_CENPQ	82	98	81	76	79	76	82	88	48	51	43	53	64	69	67	64
ENSG00000031698.13_SARS1	1666	1673	1516	1505	1217	1218	1288	1276	2828	2774	2573	2475	3367	3392	3445	3585
ENSG00000031823.14_RANBP3	1197	1138	1008	990	889	827	962	967	796	830	667	743	818	808	859	881
ENSG00000032219.19_ARID4A	179	221	204	184	188	192	171	201	372	355	288	326	310	287	317	340
ENSG00000032389.13_EIPR1	192	186	184	198	147	141	122	137	316	300	297	292	444	397	431	409
ENSG00000032444.17_PNPLA6	2907	3030	2660	2678	3006	2918	3119	3158	3031	3073	2638	2623	3034	3245	3387	3372
ENSG00000032742.18_IFT88	63	71	60	83	72	59	67	47	87	114	106	100	117	113	113	98
ENSG00000033011.14_ALG1	737	681	687	677	979	992	997	994	254	243	219	227	229	260	226	280
ENSG00000033030.15_ZCCHC8	322	294	236	291	250	218	245	279	451	494	393	359	430	443	486	523
ENSG00000033050.9_ABCF2	1855	1782	1786	1733	1705	1688	1704	1621	492	494	407	453	508	534	566	547
ENSG00000033100.16_CHPF2	2872	2887	2615	2671	3017	2892	3067	3074	887	916	833	772	1035	943	987	1084
ENSG00000033122.21_LRRC7	0	0	1	0	0	2	0	0	1	0	0	0	0	0	1	0
ENSG00000033170.17_FUT8	241	257	247	241	349	332	329	350	461	430	364	375	579	584	675	612
ENSG00000033178.13_UBA6	1042	1068	978	994	958	870	953	903	672	711	537	557	891	833	934	1030
ENSG00000033327.13_GAB2	235	232	195	206	160	144	170	175	364	338	307	276	447	422	490	470
ENSG00000033627.17_ATP6V0A1	1582	1642	1558	1521	1963	1828	1847	1974	1070	1113	992	1019	1033	1038	1052	1032
ENSG00000033800.14_PIAS1	330	326	325	342	296	277	270	253	252	242	218	188	253	278	290	303
ENSG00000033867.16_SLC4A7	548	540	442	476	602	551	631	657	511	492	389	414	404	473	520	493
ENSG00000034053.15_APBA2	0	0	0	0	0	0	1	2	7	8	1	4	2	2	5	6
ENSG00000034152.19_MAP2K3	1193	1174	1084	1079	828	787	819	853	405	400	329	323	435	402	479	469
ENSG00000034239.11_EFCAB1	0	0	0	0	0	0	0	0	0	0	0	0	0	0	0	0
ENSG00000034510.6_TMSB10	5621	5592	5194	5129	4696	4685	4738	4941	7695	7681	7442	7778	11036	10894	10800	10848
ENSG00000034533.12_ASTE1	62	41	44	47	41	46	45	51	33	32	29	25	34	33	36	42
ENSG00000034677.13_RNF19A	737	733	667	700	640	648	636	679	509	525	412	432	413	466	514	484
ENSG00000034693.15_PEX3	190	162	158	172	153	157	164	149	149	163	139	116	188	162	195	197
ENSG00000034713.8_GABARAPL2	469	487	518	442	532	548	508	527	251	228	222	240	431	453	441	454
ENSG00000034971.17_MYOC	0	0	0	0	0	0	0	0	0	0	0	0	0	1	0	0
ENSG00000035115.22_SH3YL1	65	67	83	49	63	45	53	48	661	665	569	546	681	618	707	722
ENSG00000035141.8_FAM136A	891	932	888	883	725	730	693	709	1046	1009	942	904	1039	1062	1102	1078
ENSG00000035403.18_VCL	1219	1200	1081	1074	1056	1058	1122	1139	5924	5743	4760	4851	5654	5599	6357	6253
ENSG00000035499.13_DEPDC1B	227	229	182	220	190	190	221	189	73	76	52	55	94	98	114	116
ENSG00000035664.11_DAPK2	1	5	3	5	5	3	4	4	96	85	77	76	43	34	47	39
ENSG00000035681.9_NSMAF	1807	1838	1531	1615	1166	1324	1390	1392	478	459	385	409	512	436	525	510
ENSG00000035687.10_ADSS2	325	337	286	349	315	318	299	331	385	347	324	352	452	486	476	484
ENSG00000035720.8_STAP1	0	0	0	0	0	0	0	1	1	0	0	0	1	0	0	0
ENSG00000035862.12_TIMP2	25	27	22	17	31	20	29	33	2528	2475	2351	2270	4215	4146	4283	4368
ENSG00000035928.16_RFC1	966	927	859	859	733	697	736	761	891	862	743	744	771	783	854	845
ENSG00000036054.13_TBC1D23	447	436	389	380	384	428	422	466	205	251	216	218	359	372	363	377
ENSG00000036257.13_CUL3	1030	1038	934	1001	803	780	771	825	923	928	835	786	1131	1128	1198	1205
ENSG00000036448.10_MYOM2	4	3	1	10	5	5	3	2	1	4	6	1	6	11	5	12
ENSG00000036473.8_OTC	0	0	0	0	0	0	0	0	0	0	0	0	0	0	0	0
ENSG00000036530.9_CYP46A1	1	4	1	3	1	1	1	1	1	1	0	0	1	1	0	0
ENSG00000036549.13_ZZZ3	316	343	301	271	208	237	231	262	319	349	270	267	328	322	349	393
ENSG00000036565.15_SLC18A1	0	0	0	0	0	0	0	0	0	0	0	0	0	0	0	0
ENSG00000036672.16_USP2	0	0	3	0	1	0	1	1	28	17	22	21	32	22	21	29
ENSG00000036828.17_CASR	0	0	0	0	0	0	0	0	0	0	0	0	0	1	0	0
ENSG00000037042.9_TUBG2	135	122	102	88	81	86	108	115	210	227	182	193	201	201	207	233
ENSG00000037241.7_RPL26L1	374	356	353	373	366	399	368	368	180	163	145	147	247	252	276	263
ENSG00000037280.16_FLT4	0	1	3	1	4	4	0	4	0	0	0	0	0	0	0	0
ENSG00000037474.15_NSUN2	3107	3063	2633	2644	2129	2067	2396	2345	1298	1243	1062	1083	1240	1241	1373	1348
ENSG00000037637.11_FBXO42	246	235	198	222	162	159	178	175	236	224	211	197	274	267	299	271
ENSG00000037749.13_MFAP3	275	286	253	272	401	399	421	404	404	373	330	339	429	450	492	454
ENSG00000037757.14_MRI1	370	359	321	341	280	286	307	285	6	2	4	7	9	6	6	7
ENSG00000037897.17_METTL1	254	257	209	225	217	229	247	253	110	93	101	105	116	117	104	114
ENSG00000037965.6_HOXC8	255	248	255	204	162	172	169	176	3	0	5	5	20	12	14	14
ENSG00000038002.9_AGA	129	129	101	106	167	175	197	193	132	132	107	107	140	137	163	150
ENSG00000038210.14_PI4K2B	203	200	174	194	152	157	154	169	422	403	303	338	381	400	476	445
ENSG00000038219.13_BOD1L1	976	950	899	853	653	620	678	649	1022	965	770	845	748	732	865	836
ENSG00000038274.17_MAT2B	633	586	547	583	585	575	603	589	323	350	272	326	480	472	507	497
ENSG00000038295.8_TLL1	0	0	0	0	0	0	0	0	0	0	0	0	0	0	1	1
ENSG00000038358.15_EDC4	2544	2533	2231	2270	1985	1885	2065	2104	1012	978	884	881	944	907	963	975
ENSG00000038382.20_TRIO	1473	1448	1215	1356	801	859	917	901	954	931	734	726	699	686	835	839
ENSG00000038427.16_VCAN	0	0	1	1	1	1	0	0	1	3	2	3	4	3	1	5
ENSG00000038532.16_CLEC16A	560	515	472	456	326	318	354	372	615	605	513	492	554	590	629	654
ENSG00000038945.15_MSR1	0	0	0	0	0	0	0	0	3	0	3	2	3	3	2	5
ENSG00000039068.20_CDH1	0	1	0	1	0	0	0	0	13592	13643	10996	11237	13640	13549	15397	15253
ENSG00000039123.16_MTREX	1093	1046	959	957	777	817	823	875	787	907	629	683	844	846	982	1001
ENSG00000039139.11_DNAH5	5	6	1	10	1	3	3	3	11	7	12	8	11	12	6	13
ENSG00000039319.17_ZFYVE16	352	342	320	329	295	317	321	299	442	487	370	363	475	475	569	528
ENSG00000039523.20_RIPOR1	2093	2071	1823	1915	1416	1463	1561	1495	436	432	362	362	458	468	512	511
ENSG00000039537.14_C6	0	0	0	0	0	0	0	0	0	0	0	0	0	0	0	0
ENSG00000039560.14_RAI14	771	738	726	685	537	512	524	528	166	149	130	134	145	159	165	171
ENSG00000039600.11_SOX30	0	0	0	0	0	0	0	0	1	1	0	1	3	3	1	6
ENSG00000039650.12_PNKP	638	582	572	570	489	430	472	453	675	682	620	651	609	620	611	600
ENSG00000039987.7_BEST2	0	0	0	1	0	0	0	0	2	0	0	3	3	2	1	0
ENSG00000040199.18_PHLPP2	732	703	620	664	498	505	528	541	397	342	270	299	323	298	354	390
ENSG00000040275.17_SPDL1	175	167	132	140	116	132	151	152	128	126	114	127	149	143	128	163
ENSG00000040341.18_STAU2	635	625	572	609	514	466	515	473	301	333	257	256	338	370	412	389
ENSG00000040487.13_SLC66A1	497	503	494	485	573	588	535	608	289	281	254	281	321	306	346	283
ENSG00000040531.16_CTNS	398	419	368	341	369	428	442	430	230	231	219	201	239	244	248	245
ENSG00000040608.14_RTN4R	102	80	72	90	92	77	93	89	184	199	176	167	307	302	329	311
ENSG00000040633.13_PHF23	539	554	521	463	415	431	430	466	507	480	466	429	584	545	589	577
ENSG00000040731.10_CDH10	0	1	0	0	0	1	0	0	0	0	0	0	0	0	0	1
ENSG00000040933.16_INPP4A	327	327	282	327	213	209	222	202	479	455	360	360	432	432	517	510
ENSG00000041353.10_RAB27B	0	1	0	0	1	0	1	1	516	517	440	418	603	567	626	669
ENSG00000041357.16_PSMA4	2128	2179	2095	2049	2062	2089	2032	2070	1256	1256	1131	1207	1918	1931	2047	1903
ENSG00000041515.16_MYO16	0	0	0	0	0	0	0	0	0	0	1	1	0	3	0	1
ENSG00000041802.11_LSG1	1054	1116	945	956	1049	1075	1154	1153	647	663	582	573	724	693	729	768
ENSG00000041880.15_PARP3	227	268	238	220	211	200	191	231	163	169	144	150	135	141	150	138
ENSG00000041982.16_TNC	8	4	6	5	9	5	5	11	93	115	102	98	108	94	97	98
ENSG00000041988.15_THAP3	121	156	106	137	119	98	125	113	107	113	98	107	136	128	139	126
ENSG00000042062.13_RIPOR3	0	1	0	0	1	1	2	2	4	6	4	4	4	3	6	3
ENSG00000042088.14_TDP1	342	343	326	317	284	272	281	279	107	114	93	109	105	132	118	127
ENSG00000042286.15_AIFM2	1060	1125	1075	1071	916	851	865	810	1074	1075	984	929	1203	1238	1318	1241
ENSG00000042304.13_C2orf83	0	0	0	0	0	0	0	0	0	0	0	0	0	0	0	0
ENSG00000042317.17_SPATA7	38	36	40	39	46	45	41	42	56	52	38	37	61	33	60	61
ENSG00000042429.12_MED17	537	531	490	551	486	454	452	458	302	296	244	261	326	342	360	369
ENSG00000042445.14_RETSAT	776	773	795	748	1008	988	953	999	1190	1176	1076	1054	1132	1136	1183	1158
ENSG00000042493.16_CAPG	356	359	332	334	274	304	292	294	360	347	323	321	463	448	476	465
ENSG00000042753.12_AP2S1	1270	1226	1220	1131	1284	1288	1296	1313	674	748	683	673	1006	1007	978	1044
ENSG00000042781.14_USH2A	0	0	0	2	1	1	1	0	1	1	0	0	14	17	21	16
ENSG00000042813.8_ZPBP	0	0	0	0	0	0	0	0	0	0	0	0	0	0	0	0
ENSG00000042832.12_TG	1	1	0	0	0	1	0	1	14	18	10	16	15	12	17	17
ENSG00000042980.13_ADAM28	0	0	1	2	1	1	1	1	0	0	1	0	3	2	1	1
ENSG00000043039.7_BARX2	0	0	0	0	0	1	0	0	47	45	37	48	79	72	84	72
ENSG00000043093.15_DCUN1D1	374	367	342	353	293	279	298	276	255	303	251	231	402	387	425	422
ENSG00000043143.22_JADE2	593	611	593	534	408	397	412	392	634	640	566	523	637	673	701	720
ENSG00000043355.12_ZIC2	137	139	129	112	68	84	81	88	824	764	719	666	755	806	838	824
ENSG00000043462.13_LCP2	1	0	0	0	0	0	0	0	1	1	0	0	0	0	1	0
ENSG00000043514.17_TRIT1	258	292	271	263	250	262	233	265	225	249	208	200	294	211	274	269
ENSG00000043591.6_ADRB1	7	12	7	13	9	1	3	7	23	25	24	27	40	37	41	31
ENSG00000044012.4_GUCA2B	0	0	0	0	0	0	0	0	0	0	0	0	0	0	0	0
ENSG00000044090.12_CUL7	679	683	585	592	592	600	648	667	1520	1643	1338	1364	1463	1391	1538	1561
ENSG00000044115.21_CTNNA1	3245	3317	3035	2943	2556	2417	2639	2546	2455	2477	2116	2041	2983	2937	3244	3231
ENSG00000044446.12_PHKA2	354	408	356	343	275	304	298	302	828	809	645	680	429	438	501	526
ENSG00000044459.15_CNTLN	162	201	157	178	116	105	122	102	140	113	83	100	112	121	158	133
ENSG00000044524.11_EPHA3	0	0	0	0	0	0	0	0	0	1	0	0	0	0	0	0
ENSG00000044574.9_HSPA5	31156	31235	27550	27880	37734	37899	40069	40792	16632	16726	14341	14209	17940	18088	19533	19468
ENSG00000046604.14_DSG2	1930	1985	1813	1680	2024	1997	2134	2156	4791	4863	3959	3918	4214	4417	4877	4907
ENSG00000046647.14_GEMIN8	144	130	126	121	119	125	129	130	49	54	46	42	63	58	58	74
ENSG00000046651.16_OFD1	352	360	363	362	301	301	278	268	372	347	276	295	255	256	312	295
ENSG00000046653.15_GPM6B	10	13	5	9	2	3	7	5	8	3	6	5	4	3	0	5
ENSG00000046774.10_MAGEC2	0	0	0	0	0	0	0	0	0	0	0	0	0	0	0	0
ENSG00000046889.19_PREX2	0	0	0	0	0	0	0	0	0	0	0	0	0	0	0	0
ENSG00000047056.16_WDR37	419	407	367	361	284	260	282	312	189	167	143	164	172	182	194	187
ENSG00000047188.16_YTHDC2	342	339	320	319	283	296	308	277	519	521	379	425	469	478	565	559
ENSG00000047230.15_CTPS2	218	238	203	223	148	148	151	142	208	225	185	199	243	278	268	282
ENSG00000047249.18_ATP6V1H	834	781	813	804	723	781	696	719	271	267	238	222	352	402	422	394
ENSG00000047315.17_POLR2B	2206	2268	2044	2023	1828	1680	1854	1816	925	924	824	757	877	925	959	994
ENSG00000047346.13_FAM214A	134	124	134	125	103	110	108	88	218	214	182	190	183	166	192	185
ENSG00000047365.12_ARAP2	205	187	157	174	115	130	145	137	217	239	168	200	197	194	230	219
ENSG00000047410.14_TPR	2241	2310	1977	1997	1415	1350	1561	1497	2175	2260	1855	1878	1460	1497	1666	1620
ENSG00000047457.14_CP	0	0	0	0	0	0	0	0	0	0	0	0	0	0	0	0
ENSG00000047578.13_KATNIP	347	344	306	304	203	194	214	220	396	417	369	348	316	322	342	328
ENSG00000047579.20_DTNBP1	284	252	233	252	183	171	208	163	182	197	188	191	248	230	242	214
ENSG00000047597.7_XK	78	58	65	64	75	83	83	76	178	194	150	152	252	240	279	273
ENSG00000047617.16_ANO2	0	0	0	0	0	8	7	6	4	3	10	5	15	18	14	11
ENSG00000047621.12_C12orf4	161	148	135	145	140	155	146	163	91	94	69	67	83	85	104	104
ENSG00000047634.15_SCML1	184	175	193	174	201	178	185	170	62	58	64	54	102	84	87	96
ENSG00000047644.19_WWC3	5	3	6	3	0	1	0	1	857	917	739	759	879	819	941	922
ENSG00000047648.23_ARHGAP6	0	0	1	0	0	0	1	0	0	1	3	0	6	3	4	6
ENSG00000047662.5_FAM184B	0	0	0	0	0	0	0	0	0	0	0	0	1	0	0	0
ENSG00000047849.22_MAP4	1811	1715	1607	1595	1172	1124	1180	1220	3556	3529	2979	2879	3473	3488	3910	3858
ENSG00000047932.14_GOPC	512	499	428	442	398	410	476	422	1207	1256	1004	1014	1160	1179	1327	1308
ENSG00000047936.11_ROS1	0	0	0	0	0	0	0	0	0	0	0	0	0	0	0	0
ENSG00000048028.11_USP28	309	313	260	256	227	219	246	275	270	275	240	232	294	335	348	328
ENSG00000048052.23_HDAC9	413	393	350	381	289	243	274	284	13	13	13	4	15	20	22	25
ENSG00000048140.18_TSPAN17	734	730	677	676	719	797	753	811	787	742	729	720	960	938	949	948
ENSG00000048162.21_NOP16	677	652	606	635	520	476	483	522	200	194	174	182	205	205	216	208
ENSG00000048342.18_CC2D2A	314	325	274	301	245	267	287	257	41	53	35	30	49	49	61	63
ENSG00000048392.12_RRM2B	1050	1107	987	1000	1240	1238	1282	1292	244	222	198	187	325	323	359	357
ENSG00000048405.10_ZNF800	430	411	366	387	312	319	335	337	215	222	170	166	213	219	244	267
ENSG00000048462.11_TNFRSF17	0	0	0	0	0	0	0	0	0	0	0	0	0	0	0	0
ENSG00000048471.14_SNX29	115	129	111	98	72	71	77	87	114	125	99	112	97	127	124	112
ENSG00000048540.15_LMO3	0	0	0	1	0	0	0	0	0	0	0	0	0	1	0	0
ENSG00000048544.6_MRPS10	490	514	487	453	465	477	487	473	333	314	283	266	514	514	549	567
ENSG00000048545.17_GUCA1A	0	1	3	0	1	1	0	0	1	2	1	0	3	0	3	0
ENSG00000048649.14_RSF1	734	709	713	632	507	442	486	467	959	966	836	803	886	903	948	999
ENSG00000048707.15_VPS13D	663	663	625	609	440	389	420	414	791	778	626	625	568	591	704	656
ENSG00000048740.18_CELF2	0	0	0	0	0	0	1	1	10	12	15	7	14	9	14	7
ENSG00000048828.17_FAM120A	4111	4021	3632	3604	2600	2737	2887	2853	2063	2098	1717	1704	2137	2159	2395	2412
ENSG00000048991.17_R3HDM1	599	553	511	482	340	335	395	369	474	421	375	334	424	486	508	542
ENSG00000049089.15_COL9A2	1	1	0	0	1	0	1	1	23	24	28	22	18	21	15	14
ENSG00000049130.16_KITLG	78	74	67	72	78	88	72	99	307	335	270	225	390	378	419	472
ENSG00000049167.16_ERCC8	108	129	97	100	83	65	88	87	67	62	61	45	70	62	81	67
ENSG00000049192.15_ADAMTS6	52	44	47	32	34	40	41	48	4	10	8	4	4	5	4	6
ENSG00000049239.13_H6PD	305	309	269	251	262	260	287	301	1616	1606	1250	1375	1399	1328	1553	1553
ENSG00000049245.13_VAMP3	552	540	518	475	490	464	512	487	461	429	361	354	570	593	638	671
ENSG00000049246.15_PER3	19	34	37	34	18	30	15	11	92	82	75	66	57	48	66	56
ENSG00000049247.14_UTS2	2	0	2	0	0	2	0	2	0	0	1	1	3	0	1	0
ENSG00000049249.9_TNFRSF9	3	2	0	4	2	5	1	3	1	4	1	4	1	5	3	0
ENSG00000049283.18_EPN3	1	2	1	0	2	0	1	3	429	418	365	382	317	309	315	339
ENSG00000049323.16_LTBP1	306	313	246	252	299	319	341	378	1041	1023	808	834	902	990	1052	1137
ENSG00000049449.10_RCN1	2406	2455	2206	2156	2803	2664	2893	2909	5450	5512	4694	4555	4805	4777	5247	5288
ENSG00000049540.18_ELN	0	0	0	0	0	0	0	0	1	0	0	0	0	1	3	2
ENSG00000049541.11_RFC2	544	613	524	533	450	443	464	466	288	263	267	265	364	345	350	350
ENSG00000049618.24_ARID1B	1021	1045	914	870	546	508	614	580	637	664	540	585	532	548	591	566
ENSG00000049656.14_CLPTM1L	1456	1416	1301	1306	1596	1612	1725	1648	1263	1328	1155	1093	1570	1537	1648	1681
ENSG00000049759.20_NEDD4L	509	500	412	434	349	342	393	406	758	725	679	616	805	851	896	868
ENSG00000049768.17_FOXP3	6	4	6	7	4	7	5	5	4	6	0	2	3	1	6	6
ENSG00000049769.14_PPP1R3F	47	36	44	26	25	40	43	33	72	71	68	57	87	82	89	92
ENSG00000049860.14_HEXB	1624	1583	1535	1510	2071	2071	2095	2119	1730	1702	1430	1432	2197	2093	2373	2352
ENSG00000049883.15_PTCD2	172	161	164	159	167	175	177	159	152	161	146	130	170	165	172	180
ENSG00000050030.16_NEXMIF	0	1	0	0	0	0	0	0	0	0	0	0	0	0	0	0
ENSG00000050130.18_JKAMP	582	573	548	573	890	912	908	912	312	284	244	240	464	420	513	469
ENSG00000050165.19_DKK3	1	1	0	0	0	2	1	0	0	3	1	1	4	1	2	3
ENSG00000050327.15_ARHGEF5	730	727	678	684	517	445	476	486	1408	1477	1309	1280	1273	1304	1318	1341
ENSG00000050344.9_NFE2L3	123	128	107	115	169	191	196	190	2835	2887	2521	2551	3383	3507	3674	3582
ENSG00000050393.11_MCUR1	362	326	362	319	324	310	291	312	227	235	191	223	248	266	275	261
ENSG00000050405.13_LIMA1	911	879	831	821	668	698	710	691	1179	1192	1014	992	1428	1431	1564	1555
ENSG00000050426.16_LETMD1	553	570	520	492	581	603	603	649	386	449	389	370	457	474	458	500
ENSG00000050438.17_SLC4A8	957	933	877	861	924	882	960	910	131	166	122	114	98	118	137	119
ENSG00000050555.19_LAMC3	33	29	24	27	10	12	14	13	0	0	0	1	1	0	0	0
ENSG00000050628.20_PTGER3	0	1	0	0	0	0	0	0	0	0	0	0	0	0	1	1
ENSG00000050730.16_TNIP3	0	1	0	0	0	0	0	0	0	0	0	0	0	0	0	0
ENSG00000050748.18_MAPK9	622	631	571	590	505	486	517	496	527	559	517	474	683	659	694	691
ENSG00000050767.18_COL23A1	0	1	0	0	1	0	0	0	0	0	2	1	3	0	1	0
ENSG00000050820.17_BCAR1	1178	1241	1073	1115	854	826	902	865	1421	1392	1176	1210	1561	1555	1645	1751
ENSG00000051009.11_FAM160A2	301	330	284	298	236	242	253	237	526	569	457	435	362	365	409	431
ENSG00000051108.15_HERPUD1	506	498	520	449	601	613	603	613	1318	1326	1161	1169	1583	1530	1648	1647
ENSG00000051128.19_HOMER3	1302	1249	1152	1216	963	917	982	930	433	460	445	392	454	434	417	464
ENSG00000051180.17_RAD51	243	248	197	201	153	172	182	210	261	223	204	230	274	293	282	309
ENSG00000051341.15_POLQ	474	505	439	439	357	356	366	392	274	306	258	244	232	217	249	233
ENSG00000051382.9_PIK3CB	398	331	299	315	256	264	313	283	377	407	302	313	426	412	483	488
ENSG00000051523.11_CYBA	4784	4746	4418	4319	6603	6710	6933	6988	4444	4395	4263	4213	5104	5090	5014	5011
ENSG00000051596.10_THOC3	1244	1334	1129	1135	1045	1022	1121	1128	366	370	318	344	503	478	511	513
ENSG00000051620.11_HEBP2	628	694	628	629	605	591	599	596	893	946	850	815	862	836	840	899
ENSG00000051825.15_MPHOSPH9	239	220	202	186	154	133	168	159	131	140	107	103	149	122	156	161
ENSG00000052126.15_PLEKHA5	294	242	269	218	144	157	152	163	299	311	243	249	309	295	348	340
ENSG00000052344.16_PRSS8	2	1	0	0	0	0	0	0	2552	2572	2380	2311	3208	3043	3231	3190
ENSG00000052723.12_SIKE1	377	409	391	350	391	348	372	374	331	321	279	285	397	381	406	429
ENSG00000052749.14_RRP12	1623	1688	1416	1534	1209	1299	1328	1360	815	781	681	718	838	837	861	916
ENSG00000052795.13_FNIP2	143	150	114	135	103	86	105	111	156	170	127	124	178	168	196	210
ENSG00000052802.13_MSMO1	1288	1340	1156	1265	2103	2113	2197	2206	1661	1619	1285	1352	3698	3800	4106	4175
ENSG00000052841.15_TTC17	1041	1049	981	970	1108	1064	1118	1106	2517	2503	2183	2136	2065	2029	2193	2222
ENSG00000052850.8_ALX4	0	1	0	0	1	0	0	1	1	2	3	0	1	0	0	1
ENSG00000053108.17_FSTL4	0	0	0	0	0	0	0	0	2	2	1	1	0	0	0	0
ENSG00000053254.16_FOXN3	146	150	134	142	111	78	100	91	342	340	267	253	231	250	309	280
ENSG00000053328.9_METTL24	0	0	0	0	0	0	0	0	1	0	0	0	0	0	0	0
ENSG00000053371.13_AKR7A2	356	357	351	343	382	324	320	369	236	223	194	203	255	293	294	295
ENSG00000053372.5_MRTO4	963	930	875	873	791	843	814	868	350	343	294	289	364	400	421	418
ENSG00000053438.11_NNAT	17	12	24	15	17	9	10	7	38	39	27	35	21	16	24	20
ENSG00000053501.13_USE1	180	200	184	162	150	166	176	153	167	155	158	153	222	211	220	208
ENSG00000053524.13_MCF2L2	8	11	11	6	12	10	9	12	23	19	12	15	7	4	14	9
ENSG00000053702.15_NRIP2	27	38	26	33	18	26	21	26	22	21	17	12	13	14	17	19
ENSG00000053747.17_LAMA3	0	1	0	2	0	0	1	2	2561	2618	2120	2199	1516	1531	1716	1724
ENSG00000053770.12_AP5M1	342	330	292	301	264	247	279	275	230	229	197	207	280	268	299	281
ENSG00000053900.11_ANAPC4	226	216	205	189	215	186	215	213	236	227	211	198	235	234	228	267
ENSG00000053918.18_KCNQ1	148	117	116	107	113	120	148	119	1389	1354	1205	1142	968	1064	1082	1127
ENSG00000054116.12_TRAPPC3	703	688	676	694	647	649	600	645	416	413	388	382	530	523	533	539
ENSG00000054118.15_THRAP3	3203	3232	2918	2848	2210	2298	2378	2422	2649	2497	2214	2139	2162	2174	2380	2378
ENSG00000054148.18_PHPT1	801	715	732	725	808	878	839	846	662	593	584	603	677	665	657	670
ENSG00000054179.12_ENTPD2	1795	1671	1598	1606	2157	2108	2197	2226	330	301	276	307	457	389	439	426
ENSG00000054219.11_LY75	0	0	0	1	0	0	0	0	18	13	26	16	21	26	22	11
ENSG00000054267.22_ARID4B	336	330	322	312	265	252	243	266	492	468	394	397	412	417	459	475
ENSG00000054277.14_OPN3	10	15	14	15	16	15	11	14	332	301	287	283	461	489	495	499
ENSG00000054282.16_SDCCAG8	3	1	1	0	0	0	0	0	188	175	141	163	208	217	229	239
ENSG00000054356.14_PTPRN	0	0	0	0	0	0	0	0	1	0	0	1	0	1	1	1
ENSG00000054392.13_HHAT	15	17	13	19	25	22	18	28	31	26	21	22	27	32	33	35
ENSG00000054523.19_KIF1B	1331	1309	1191	1178	771	789	850	810	1230	1201	948	965	1150	1124	1332	1319
ENSG00000054598.9_FOXC1	0	0	0	0	0	0	0	0	93	100	93	86	107	129	103	137
ENSG00000054611.14_TBC1D22A	233	237	234	208	173	176	174	175	236	230	205	195	232	225	256	237
ENSG00000054654.19_SYNE2	498	498	435	464	236	243	239	267	349	397	315	283	232	226	274	270
ENSG00000054690.14_PLEKHH1	331	327	293	298	239	276	267	279	332	338	300	260	213	239	267	239
ENSG00000054793.14_ATP9A	741	717	659	646	574	556	618	587	1616	1552	1340	1310	1296	1300	1453	1431
ENSG00000054796.13_SPO11	0	0	0	0	0	0	0	0	0	0	0	0	0	0	0	0
ENSG00000054803.4_CBLN4	0	0	0	0	0	0	0	0	0	0	0	0	0	0	0	0
ENSG00000054938.16_CHRDL2	0	0	0	0	0	0	0	0	0	0	0	0	0	0	0	0
ENSG00000054965.11_FAM168A	395	439	416	396	353	337	359	305	557	567	495	484	524	495	552	534
ENSG00000054967.13_RELT	773	777	666	718	731	713	754	787	258	297	226	230	240	227	254	275
ENSG00000054983.17_GALC	1	0	0	0	0	0	0	1	1212	1264	1106	1043	2118	2114	2329	2209
ENSG00000055044.11_NOP58	1710	1697	1517	1573	1477	1502	1546	1583	852	840	717	764	898	915	958	969
ENSG00000055070.17_SZRD1	2031	2082	1929	1953	1556	1542	1559	1524	1298	1337	1125	1209	1675	1589	1703	1738
ENSG00000055118.17_KCNH2	810	800	739	715	713	618	736	666	88	95	89	73	173	148	149	192
ENSG00000055130.17_CUL1	2154	2088	1894	1852	1424	1364	1511	1517	743	798	655	684	795	830	876	859
ENSG00000055147.19_FAM114A2	194	205	157	170	181	198	214	221	126	123	88	84	130	144	171	171
ENSG00000055163.20_CYFIP2	1131	1090	979	978	762	761	787	872	601	576	495	476	520	525	582	591
ENSG00000055208.19_TAB2	654	624	590	620	465	443	438	459	474	465	386	360	528	501	599	579
ENSG00000055211.14_GINM1	365	353	308	315	530	525	575	566	563	536	483	450	755	700	794	787
ENSG00000055332.19_EIF2AK2	1192	1175	1074	1053	843	874	900	921	1095	1055	878	842	1221	1200	1368	1386
ENSG00000055483.19_USP36	1861	1861	1700	1693	1212	1105	1177	1229	1112	1100	908	946	750	760	861	822
ENSG00000055609.21_KMT2C	910	870	797	777	477	466	520	508	588	613	511	490	469	468	556	491
ENSG00000055732.13_MCOLN3	184	190	203	180	259	245	241	241	94	93	89	93	72	94	81	76
ENSG00000055813.6_CCDC85A	0	0	0	0	0	0	0	0	1	0	3	0	1	1	0	3
ENSG00000055917.16_PUM2	887	831	802	781	625	619	668	609	693	686	598	552	772	747	863	816
ENSG00000055950.16_MRPL43	401	403	364	377	414	451	449	447	286	313	309	282	477	456	446	476
ENSG00000055955.17_ITIH4	0	2	0	1	0	0	0	1	44	60	40	42	46	37	46	51
ENSG00000055957.11_ITIH1	0	0	0	0	0	0	0	0	0	0	0	0	1	0	1	1
ENSG00000056050.7_HPF1	235	250	268	227	213	247	209	215	243	232	219	218	316	287	303	315
ENSG00000056097.16_ZFR	1434	1453	1285	1304	1085	1084	1162	1144	810	813	711	659	961	979	1061	1059
ENSG00000056277.16_ZNF280C	132	117	134	107	96	92	80	101	66	63	56	46	73	72	79	87
ENSG00000056291.19_NPFFR2	0	0	0	0	0	0	0	0	0	0	0	0	0	0	0	0
ENSG00000056487.16_PHF21B	0	0	0	0	0	0	0	0	0	0	0	0	0	0	0	0
ENSG00000056558.11_TRAF1	33	33	30	40	39	42	47	28	233	237	193	193	128	138	154	153
ENSG00000056586.16_RC3H2	754	770	766	729	617	570	605	517	383	400	324	387	402	356	383	395
ENSG00000056736.10_IL17RB	147	157	143	151	200	182	186	196	122	132	102	112	92	75	94	91
ENSG00000056972.20_TRAF3IP2	288	323	262	257	207	181	216	227	313	298	279	263	323	368	370	359
ENSG00000056998.20_GYG2	0	0	0	0	0	0	0	0	4	4	3	4	2	3	3	2
ENSG00000057019.16_DCBLD2	1095	1019	964	939	1049	1055	1129	1098	537	498	439	462	939	911	1004	977
ENSG00000057149.16_SERPINB3	0	0	0	0	0	0	0	0	0	0	0	0	0	0	0	0
ENSG00000057252.13_SOAT1	1019	949	942	962	1343	1276	1297	1332	318	328	246	275	324	374	403	389
ENSG00000057294.16_PKP2	354	297	339	296	269	295	254	291	1156	1127	876	842	1289	1334	1554	1548
ENSG00000057468.7_MSH4	9	8	8	7	5	3	4	8	23	19	14	30	21	16	13	17
ENSG00000057593.14_F7	0	0	0	0	0	0	0	0	0	0	4	1	0	0	0	1
ENSG00000057608.17_GDI2	2009	1942	1897	1900	1795	1819	1809	1755	1621	1632	1414	1420	2286	2352	2456	2504
ENSG00000057657.17_PRDM1	21	24	21	21	24	15	23	16	20	11	13	13	19	22	28	17
ENSG00000057663.16_ATG5	232	223	199	226	191	210	206	199	159	148	147	165	268	263	249	269
ENSG00000057704.13_TMCC3	1	1	3	2	1	0	2	1	73	75	67	67	70	74	76	71
ENSG00000057757.10_PITHD1	638	647	596	587	516	529	558	521	465	414	366	391	522	510	566	545
ENSG00000057935.14_MTA3	341	301	298	287	260	219	251	250	625	676	565	548	688	760	770	798
ENSG00000058056.10_USP13	325	306	282	289	180	212	202	211	232	210	156	180	210	224	260	258
ENSG00000058063.16_ATP11B	807	812	760	751	855	876	891	879	1412	1350	1177	1118	1340	1395	1554	1484
ENSG00000058085.15_LAMC2	4	1	4	4	7	9	6	9	1568	1534	1201	1175	1816	1789	2118	2092
ENSG00000058091.17_CDK14	1	1	1	1	0	1	1	3	0	0	0	0	0	0	2	2
ENSG00000058262.10_SEC61A1	5901	5925	5433	5241	7711	7530	8002	8102	4653	4745	4171	4014	5103	5016	5427	5367
ENSG00000058272.19_PPP1R12A	888	872	762	793	581	541	583	634	760	731	630	636	693	693	785	730
ENSG00000058335.16_RASGRF1	0	0	0	0	1	0	0	0	23	26	22	31	38	45	43	34
ENSG00000058404.20_CAMK2B	0	1	1	0	0	0	3	1	10	10	6	9	3	3	6	4
ENSG00000058453.17_CROCC	390	378	376	342	289	318	313	300	634	639	575	584	503	492	516	487
ENSG00000058600.16_POLR3E	775	724	668	623	479	483	521	560	833	832	708	685	744	746	816	834
ENSG00000058668.15_ATP2B4	315	321	295	290	349	344	367	354	464	508	401	399	423	448	496	484
ENSG00000058673.17_ZC3H11A	2188	2032	1883	1953	1678	1614	1677	1767	2829	2730	2278	2295	2590	2406	2720	2901
ENSG00000058729.11_RIOK2	421	406	393	439	402	388	364	376	221	221	200	221	278	262	239	298
ENSG00000058799.15_YIPF1	125	112	110	93	109	107	109	133	71	90	58	58	134	120	139	159
ENSG00000058804.12_NDC1	580	546	506	531	844	822	841	898	586	563	497	484	619	633	695	663
ENSG00000058866.15_DGKG	301	325	317	274	269	267	283	254	22	24	18	19	31	20	40	18
ENSG00000059122.17_FLYWCH1	1529	1504	1379	1418	1080	1058	1146	1043	753	723	652	625	639	661	713	681
ENSG00000059145.19_UNKL	317	367	290	333	255	263	272	269	234	219	201	177	183	173	202	195
ENSG00000059377.18_TBXAS1	8	5	5	5	4	5	6	6	17	13	12	13	27	27	28	31
ENSG00000059378.13_PARP12	396	411	359	410	331	348	335	337	413	407	386	392	488	435	452	462
ENSG00000059573.9_ALDH18A1	4155	4123	3782	3756	5048	5168	5399	5322	2012	1915	1612	1677	2053	2113	2293	2296
ENSG00000059588.10_TARBP1	281	282	245	235	209	197	231	227	368	367	290	312	246	240	295	264
ENSG00000059691.12_GATB	375	391	312	336	292	313	331	355	155	172	142	169	175	181	178	175
ENSG00000059728.11_MXD1	330	358	301	343	304	280	302	288	536	472	432	394	396	371	447	426
ENSG00000059758.8_CDK17	916	883	859	809	649	733	694	716	134	144	118	115	162	176	188	183
ENSG00000059769.20_DNAJC25	234	234	211	234	284	294	296	292	123	122	111	113	154	131	128	164
ENSG00000059804.16_SLC2A3	203	216	194	169	229	225	248	247	696	658	568	637	1154	1142	1202	1228
ENSG00000059915.17_PSD	22	17	10	13	12	7	19	11	96	111	92	88	90	82	97	87
ENSG00000060069.18_CTDP1	619	562	573	535	393	429	411	411	661	583	541	583	532	505	536	522
ENSG00000060138.13_YBX3	2206	2169	1898	1919	1651	1662	1848	1789	1916	1848	1690	1721	2229	2289	2294	2382
ENSG00000060140.9_STYK1	7	6	6	7	11	8	9	8	146	156	119	122	196	184	213	217
ENSG00000060237.19_WNK1	2221	2160	1965	1995	1222	1289	1355	1285	2109	2104	1699	1641	1860	1908	2198	2184
ENSG00000060303.5_RPS17P5	0	0	0	0	0	0	0	0	0	0	0	0	0	0	0	0
ENSG00000060339.14_CCAR1	1518	1469	1311	1386	1087	1096	1173	1128	1029	1007	803	885	997	995	1084	1135
ENSG00000060491.17_OGFR	2281	2294	2113	2125	1596	1733	1688	1706	1027	1134	931	953	1036	893	1061	993
ENSG00000060558.4_GNA15	15	14	10	12	9	6	9	11	0	0	0	0	0	0	0	0
ENSG00000060566.14_CREB3L3	0	0	0	0	0	2	0	0	4	0	4	0	4	3	2	3
ENSG00000060642.11_PIGV	167	169	168	163	204	180	189	184	251	249	228	219	280	323	312	321
ENSG00000060656.20_PTPRU	509	513	462	438	445	474	515	479	1806	1772	1541	1499	1537	1553	1755	1620
ENSG00000060688.13_SNRNP40	630	677	653	635	612	605	594	573	314	360	314	293	459	481	479	504
ENSG00000060709.15_RIMBP2	1	0	0	1	0	0	0	0	0	0	0	0	0	0	0	1
ENSG00000060718.22_COL11A1	1	2	1	0	1	1	0	0	0	0	0	0	0	0	0	0
ENSG00000060749.16_QSER1	910	872	758	772	584	661	704	694	364	379	264	271	337	335	431	409
ENSG00000060762.19_MPC1	215	219	196	251	263	251	248	236	83	81	68	71	167	149	172	172
ENSG00000060971.19_ACAA1	406	430	369	350	308	305	343	340	1513	1561	1321	1362	1162	1220	1267	1258
ENSG00000060982.15_BCAT1	6	2	4	1	1	4	5	1	0	1	1	0	2	3	0	5
ENSG00000061273.18_HDAC7	1735	1768	1477	1598	1184	1184	1313	1277	1546	1580	1365	1330	1321	1379	1478	1426
ENSG00000061337.15_LZTS1	0	0	0	0	0	0	0	0	0	1	0	1	3	0	3	2
ENSG00000061455.11_PRDM6	0	1	3	2	1	3	2	2	17	13	13	12	13	10	17	8
ENSG00000061492.12_WNT8A	0	0	0	0	0	0	0	0	0	0	0	0	0	0	0	0
ENSG00000061656.11_SPAG4	12	8	11	11	7	10	6	6	36	40	34	35	32	33	27	37
ENSG00000061676.15_NCKAP1	2597	2587	2286	2358	2068	2031	2148	2215	2228	2189	1880	1846	2676	2622	2912	2879
ENSG00000061794.13_MRPS35	824	803	818	786	853	818	789	828	384	407	336	337	580	577	632	623
ENSG00000061918.14_GUCY1B1	0	0	0	0	0	0	0	0	0	0	0	0	0	0	0	0
ENSG00000061936.10_SFSWAP	976	935	855	803	647	569	665	689	886	818	768	768	606	708	668	670
ENSG00000061938.21_TNK2	671	702	618	626	501	446	524	469	724	725	634	633	512	515	550	534
ENSG00000061987.16_MON2	623	584	558	537	430	452	429	495	413	412	323	318	433	431	524	484
ENSG00000062038.15_CDH3	3	6	6	3	1	0	1	0	1684	1628	1459	1488	1861	1791	1951	1878
ENSG00000062096.15_ARSF	0	0	0	0	0	0	0	0	0	0	0	0	0	0	0	0
ENSG00000062194.16_GPBP1	726	753	686	664	572	539	565	590	745	743	609	651	838	849	931	909
ENSG00000062282.15_DGAT2	82	74	77	69	98	91	103	92	139	132	130	142	164	145	147	143
ENSG00000062370.17_ZNF112	63	64	49	58	44	62	70	51	52	49	48	48	25	24	25	17
ENSG00000062485.19_CS	4720	4697	4339	4237	3747	3805	4024	3861	1443	1377	1223	1215	1617	1522	1653	1717
ENSG00000062524.16_LTK	544	541	498	516	485	450	470	480	33	27	35	27	24	24	17	24
ENSG00000062582.14_MRPS24	1018	1060	952	961	992	962	994	1028	390	455	406	409	611	550	551	603
ENSG00000062598.18_ELMO2	337	363	334	343	287	270	275	263	217	198	140	155	181	204	246	239
ENSG00000062650.20_WAPL	1252	1156	1041	1043	727	733	848	788	843	814	739	695	874	864	921	943
ENSG00000062716.13_VMP1	1952	2103	1908	1930	2922	2950	3023	2991	1330	1332	1146	1206	1801	1844	1891	1967
ENSG00000062725.10_APPBP2	269	292	251	238	270	231	277	271	425	429	310	367	479	459	548	526
ENSG00000062822.15_POLD1	1908	1864	1680	1723	1357	1332	1421	1417	1018	1048	979	923	908	928	909	931
ENSG00000063015.20_SEZ6	0	0	0	0	0	0	0	0	0	1	0	0	0	0	0	2
ENSG00000063046.18_EIF4B	14142	14403	12740	12665	9580	9483	10255	10232	6589	6619	5725	5885	6387	6429	6768	6777
ENSG00000063127.16_SLC6A16	14	15	14	6	3	4	9	9	5	3	4	0	0	5	5	1
ENSG00000063169.11_BICRA	206	216	184	217	152	144	137	152	226	214	210	177	214	193	222	208
ENSG00000063176.16_SPHK2	174	191	174	142	144	135	164	148	211	207	221	181	208	239	219	219
ENSG00000063177.13_RPL18	10598	10387	10894	10832	12417	12286	12248	12125	9408	9361	9063	8933	12957	12918	12931	13172
ENSG00000063180.9_CA11	155	162	141	123	106	106	132	116	594	619	521	605	459	459	469	430
ENSG00000063241.8_ISOC2	258	262	250	250	216	243	246	205	142	141	146	127	193	216	204	205
ENSG00000063244.13_U2AF2	5392	5298	4802	4793	3703	3575	3861	3869	2813	2780	2566	2536	2461	2468	2433	2558
ENSG00000063245.15_EPN1	1845	1963	1786	1770	1371	1421	1404	1414	1012	995	906	844	1046	1090	1148	1131
ENSG00000063322.15_MED29	480	460	433	461	341	325	340	313	344	410	330	333	441	424	450	467
ENSG00000063438.20_AHRR	21	24	22	17	34	15	13	40	407	412	367	330	211	196	227	220
ENSG00000063515.3_GSC2	0	0	0	0	0	0	0	1	0	0	0	0	0	0	0	1
ENSG00000063587.15_ZNF275	359	333	317	329	234	226	235	226	237	233	196	198	180	177	203	193
ENSG00000063601.17_MTMR1	532	535	495	470	443	398	443	441	297	292	257	273	350	351	363	367
ENSG00000063660.9_GPC1	1227	1234	1128	1103	1732	1655	1758	1810	2344	2355	2058	2088	2389	2449	2469	2631
ENSG00000063761.16_ADCK1	116	102	88	101	115	104	125	113	104	112	76	102	97	101	103	120
ENSG00000063854.13_HAGH	316	297	301	290	241	252	247	232	266	283	271	278	385	392	370	380
ENSG00000063978.16_RNF4	727	729	659	623	518	491	531	569	512	498	406	411	564	526	611	622
ENSG00000064012.22_CASP8	405	401	385	376	406	422	434	405	310	330	298	242	333	345	388	354
ENSG00000064042.18_LIMCH1	393	405	339	362	297	249	280	317	1059	1097	858	900	993	1010	1175	1093
ENSG00000064102.15_INTS13	908	946	825	883	764	804	810	808	217	192	149	170	274	269	309	312
ENSG00000064115.11_TM7SF3	1860	1830	1728	1743	2742	2706	2843	2763	485	492	442	376	551	576	630	610
ENSG00000064195.7_DLX3	0	0	0	0	0	0	0	0	8	9	10	12	15	13	7	15
ENSG00000064199.7_SPA17	190	186	162	160	131	153	169	151	67	78	60	57	78	77	89	86
ENSG00000064201.16_TSPAN32	0	0	0	0	0	0	0	0	0	4	1	1	0	0	0	0
ENSG00000064205.11_CCN5	0	0	1	0	0	0	0	1	0	0	0	0	0	0	0	0
ENSG00000064218.5_DMRT3	0	0	0	0	0	0	0	0	0	0	0	0	0	0	0	0
ENSG00000064225.12_ST3GAL6	0	1	0	0	2	0	0	0	0	0	0	0	1	0	0	0
ENSG00000064270.13_ATP2C2	0	0	0	3	0	3	0	0	2206	2222	1934	1958	2055	2012	2100	2194
ENSG00000064300.9_NGFR	0	0	0	0	0	0	0	0	0	0	0	0	0	0	0	0
ENSG00000064309.16_CDON	39	47	45	46	45	63	45	57	198	216	168	154	222	178	250	220
ENSG00000064313.12_TAF2	1312	1247	1132	1093	910	867	986	979	462	457	328	364	420	442	517	524
ENSG00000064393.16_HIPK2	1429	1522	1323	1285	758	768	877	789	534	514	438	445	466	425	503	478
ENSG00000064419.14_TNPO3	2098	2119	1967	1940	1419	1395	1389	1467	954	941	772	733	940	977	1090	1118
ENSG00000064489.23_BORCS8-MEF2B	6	0	3	6	4	16	11	7	21	12	16	22	19	20	13	18
ENSG00000064490.14_RFXANK	316	304	284	311	253	247	232	256	413	423	405	392	397	432	391	416
ENSG00000064545.15_TMEM161A	774	738	665	734	943	899	962	947	792	838	780	753	814	880	844	834
ENSG00000064547.14_LPAR2	141	138	144	122	161	161	169	155	543	564	511	530	532	553	517	554
ENSG00000064601.21_CTSA	4056	3911	3605	3435	4380	4333	4663	4704	1506	1487	1320	1256	1483	1446	1566	1592
ENSG00000064607.17_SUGP2	1874	1956	1733	1708	1422	1553	1551	1604	2183	2215	1777	1856	1270	1342	1505	1484
ENSG00000064651.14_SLC12A2	715	677	599	655	768	738	770	822	4821	4804	3896	4007	2945	2992	3383	3447
ENSG00000064652.11_SNX24	134	138	120	116	109	107	116	122	114	116	103	107	137	136	139	143
ENSG00000064655.19_EYA2	0	0	0	0	0	0	0	0	0	0	0	0	0	0	0	1
ENSG00000064666.15_CNN2	1804	1790	1686	1680	1393	1360	1422	1350	2677	2677	2409	2437	3477	3397	3583	3557
ENSG00000064687.13_ABCA7	431	458	416	389	358	364	359	400	2725	2551	2229	2232	2152	2179	2399	2359
ENSG00000064692.20_SNCAIP	4	3	9	1	4	1	1	1	20	32	18	22	32	20	27	34
ENSG00000064703.13_DDX20	395	381	358	336	309	317	320	347	242	233	229	211	268	257	291	241
ENSG00000064726.10_BTBD1	898	975	857	858	726	730	757	753	676	647	541	561	780	881	911	920
ENSG00000064763.11_FAR2	220	225	222	212	221	221	215	218	95	95	83	81	119	139	127	151
ENSG00000064787.13_BCAS1	1	3	5	2	4	4	4	2	119	102	116	85	105	100	109	99
ENSG00000064835.12_POU1F1	0	0	0	0	0	0	0	0	0	0	0	0	0	0	0	1
ENSG00000064886.14_CHI3L2	0	0	0	0	0	0	0	0	0	3	1	0	0	0	0	1
ENSG00000064932.16_SBNO2	1742	1678	1461	1536	1172	1231	1323	1308	956	948	880	856	851	843	846	871
ENSG00000064933.18_PMS1	220	239	202	210	207	180	208	204	277	266	244	218	278	252	274	304
ENSG00000064961.19_HMG20B	888	934	792	793	646	584	665	696	1035	1120	1036	974	964	918	964	891
ENSG00000064989.13_CALCRL	0	1	3	1	4	7	5	3	0	1	2	1	0	0	1	1
ENSG00000064995.18_TAF11	203	198	177	210	176	169	157	179	98	120	98	110	144	168	152	161
ENSG00000064999.15_ANKS1A	709	686	597	659	433	464	470	479	508	584	432	426	431	499	574	519
ENSG00000065000.19_AP3D1	1784	1695	1544	1544	1157	1234	1333	1246	3010	2954	2564	2624	2944	3030	3161	3215
ENSG00000065029.15_ZNF76	297	295	263	258	197	215	228	221	412	444	334	363	248	280	283	332
ENSG00000065054.14_SLC9A3R2	430	429	399	395	270	266	290	253	479	465	455	456	442	452	418	437
ENSG00000065057.9_NTHL1	161	159	141	160	145	135	144	138	170	175	173	164	201	217	219	187
ENSG00000065060.17_UHRF1BP1	714	618	597	596	430	438	468	456	820	795	613	606	725	785	876	942
ENSG00000065135.12_GNAI3	827	886	788	837	819	822	791	857	708	763	626	658	1076	1160	1170	1218
ENSG00000065150.21_IPO5	2259	2132	2081	2054	1965	2025	1991	2035	1920	1951	1605	1623	2373	2327	2544	2637
ENSG00000065154.12_OAT	923	909	862	867	858	895	873	895	637	612	569	551	838	808	831	892
ENSG00000065183.16_WDR3	989	929	881	812	868	802	917	886	340	365	314	290	467	463	471	534
ENSG00000065243.20_PKN2	812	810	722	702	665	643	708	715	695	717	539	588	778	717	846	862
ENSG00000065268.11_WDR18	734	668	642	674	594	588	598	592	506	496	453	468	552	525	549	545
ENSG00000065308.5_TRAM2	734	767	699	665	734	674	725	750	973	989	859	824	1167	1223	1237	1344
ENSG00000065320.9_NTN1	202	219	180	196	212	184	224	199	171	136	134	123	173	180	189	199
ENSG00000065325.13_GLP2R	0	0	0	0	0	0	0	0	2	3	4	1	2	3	4	1
ENSG00000065328.17_MCM10	399	418	347	391	290	297	317	301	229	202	211	209	233	242	232	226
ENSG00000065357.20_DGKA	369	345	318	311	312	303	350	315	302	285	273	254	304	289	321	294
ENSG00000065361.17_ERBB3	358	349	283	341	305	258	299	312	3728	3761	3197	3187	2372	2273	2562	2518
ENSG00000065371.17_ROPN1	0	0	0	0	0	0	0	0	0	0	0	0	0	0	0	0
ENSG00000065413.20_ANKRD44	114	110	94	95	60	60	76	64	34	31	23	22	22	24	33	30
ENSG00000065427.15_KARS1	2264	2283	2051	2021	1751	1781	1894	1866	1013	976	888	851	1261	1226	1306	1342
ENSG00000065457.11_ADAT1	467	476	420	418	359	354	369	397	340	365	320	308	376	365	399	374
ENSG00000065485.20_PDIA5	270	263	242	251	357	335	333	385	490	589	495	517	644	651	662	641
ENSG00000065491.8_TBC1D22B	183	188	157	170	122	125	136	135	170	132	137	145	203	229	214	228
ENSG00000065518.8_NDUFB4	867	889	866	866	805	793	795	731	607	611	558	559	742	751	758	773
ENSG00000065526.12_SPEN	2525	2578	2240	2234	1554	1548	1719	1691	1485	1561	1240	1188	1116	1160	1345	1325
ENSG00000065534.19_MYLK	3	4	4	2	8	10	9	11	102	105	84	85	136	129	145	149
ENSG00000065548.18_ZC3H15	1202	1197	1149	1070	1030	1033	1043	1077	815	778	705	667	1094	1129	1182	1212
ENSG00000065559.15_MAP2K4	258	275	247	260	207	236	224	216	241	243	208	221	331	333	363	337
ENSG00000065600.13_PACC1	262	284	243	238	355	374	404	378	146	149	116	129	219	202	245	218
ENSG00000065609.14_SNAP91	0	0	0	0	0	0	0	1	0	0	0	0	0	0	0	0
ENSG00000065613.15_SLK	1344	1377	1216	1177	807	801	877	886	1263	1248	990	969	1056	1030	1224	1250
ENSG00000065615.14_CYB5R4	189	193	155	185	173	206	192	211	33	49	32	32	62	61	69	71
ENSG00000065618.21_COL17A1	1	0	1	1	4	4	4	1	391	405	341	321	440	447	504	476
ENSG00000065621.15_GSTO2	99	107	112	105	113	133	132	98	223	212	186	182	281	273	319	284
ENSG00000065665.21_SEC61A2	265	274	264	243	363	336	364	352	131	144	117	119	141	128	139	152
ENSG00000065675.15_PRKCQ	108	84	94	102	92	114	97	97	33	29	31	23	33	29	35	30
ENSG00000065717.15_TLE2	314	351	313	338	253	266	257	236	111	100	65	110	133	108	132	134
ENSG00000065802.12_ASB1	1144	1102	1065	1010	785	778	805	791	436	443	357	390	414	423	467	446
ENSG00000065809.14_FAM107B	108	105	88	108	63	79	74	70	211	215	199	183	361	390	374	419
ENSG00000065833.9_ME1	4	3	1	3	0	0	1	0	1196	1244	1034	1032	2251	2240	2414	2461
ENSG00000065882.16_TBC1D1	853	837	706	758	517	454	549	540	349	362	308	315	363	354	380	380
ENSG00000065883.16_CDK13	347	330	286	299	213	188	230	220	662	609	513	558	632	609	675	688
ENSG00000065911.13_MTHFD2	1433	1437	1359	1281	1142	1094	1150	1155	2071	2096	1778	1793	2960	2976	3162	3249
ENSG00000065923.10_SLC9A7	592	650	515	540	620	569	699	628	431	441	385	334	430	436	497	472
ENSG00000065970.9_FOXJ2	393	366	343	351	298	269	308	281	400	420	339	350	443	417	448	498
ENSG00000065978.19_YBX1	19758	19861	17074	17208	11797	11680	13185	13153	7740	7719	6979	6932	8737	8922	9279	9073
ENSG00000065989.16_PDE4A	36	20	37	21	19	15	20	4	67	59	59	56	70	69	72	68
ENSG00000066027.12_PPP2R5A	294	288	285	292	227	253	235	215	365	348	296	306	438	415	455	477
ENSG00000066032.19_CTNNA2	0	0	0	0	0	0	0	0	0	0	0	0	0	1	0	0
ENSG00000066044.15_ELAVL1	2047	2055	1908	1924	1569	1617	1616	1605	733	771	669	672	977	936	1009	1000
ENSG00000066056.14_TIE1	9	4	5	7	5	8	8	6	0	1	0	0	0	0	1	0
ENSG00000066084.13_DIP2B	1323	1376	1180	1279	823	845	862	871	803	788	584	652	732	740	869	865
ENSG00000066117.15_SMARCD1	1502	1497	1360	1393	1129	1118	1162	1157	788	808	709	692	831	822	887	863
ENSG00000066135.13_KDM4A	644	636	578	548	425	443	478	471	777	828	650	684	776	752	842	857
ENSG00000066136.20_NFYC	322	304	269	281	254	242	263	277	349	317	269	313	364	415	402	427
ENSG00000066185.13_ZMYND12	0	0	0	0	0	6	1	6	2	1	1	0	0	1	0	1
ENSG00000066230.12_SLC9A3	221	266	229	231	171	189	190	166	186	225	186	180	105	122	114	118
ENSG00000066248.15_NGEF	150	178	131	154	111	93	110	118	16	21	20	10	21	28	30	23
ENSG00000066279.19_ASPM	1094	1078	931	967	864	874	944	957	722	725	564	547	509	530	642	628
ENSG00000066294.15_CD84	0	1	0	0	0	0	0	1	0	0	3	1	2	2	0	0
ENSG00000066322.15_ELOVL1	1565	1593	1509	1508	2174	2233	2258	2219	1027	1042	943	967	1411	1517	1532	1478
ENSG00000066336.12_SPI1	3	4	4	3	0	3	3	2	0	0	4	2	0	0	1	0
ENSG00000066379.15_POLR1H	141	147	121	121	130	159	162	163	78	61	67	69	124	118	112	130
ENSG00000066382.17_MPPED2	0	0	0	0	0	0	0	0	0	0	0	0	0	0	0	0
ENSG00000066405.13_CLDN18	0	1	0	0	1	1	1	3	0	0	0	0	0	1	0	0
ENSG00000066422.5_ZBTB11	328	355	318	298	299	276	317	290	393	364	287	280	374	376	463	442
ENSG00000066427.24_ATXN3	115	103	96	80	81	70	90	93	174	178	156	160	178	181	195	177
ENSG00000066455.13_GOLGA5	318	303	293	276	222	237	230	246	433	492	389	387	559	580	636	613
ENSG00000066468.24_FGFR2	70	74	59	56	87	78	81	109	99	124	104	100	87	87	81	92
ENSG00000066557.6_LRRC40	293	296	283	278	264	273	272	264	208	212	171	158	278	260	316	300
ENSG00000066583.12_ISOC1	233	222	214	223	167	193	180	173	156	175	136	154	197	189	205	208
ENSG00000066629.18_EML1	0	0	0	0	0	0	0	0	1	7	0	1	2	7	11	6
ENSG00000066651.20_TRMT11	308	320	290	271	272	305	298	318	141	157	121	119	209	166	205	218
ENSG00000066654.14_THUMPD1	567	573	479	490	417	387	463	450	516	545	435	439	541	561	601	630
ENSG00000066697.15_MSANTD3	1042	1042	900	896	678	683	775	754	162	144	130	115	182	187	220	200
ENSG00000066735.15_KIF26A	290	299	283	269	211	223	224	211	17	21	12	16	14	14	18	14
ENSG00000066739.12_ATG2B	554	558	496	504	362	390	375	422	321	308	234	233	251	226	293	305
ENSG00000066777.9_ARFGEF1	949	1028	889	867	691	697	733	761	807	762	614	601	748	779	871	926
ENSG00000066813.14_ACSM2B	0	0	0	0	0	0	0	0	0	0	0	0	2	0	0	0
ENSG00000066827.16_ZFAT	176	187	161	156	104	97	120	103	111	95	81	89	86	88	111	82
ENSG00000066855.16_MTFR1	616	620	585	580	557	588	619	537	337	351	318	303	451	468	466	491
ENSG00000066923.18_STAG3	5	5	3	3	1	4	4	5	9	6	3	8	3	3	6	2
ENSG00000066926.13_FECH	316	357	292	324	262	292	302	274	314	280	265	246	367	367	397	394
ENSG00000066933.16_MYO9A	204	186	168	157	120	104	143	123	369	385	265	287	347	342	419	432
ENSG00000067048.17_DDX3Y	0	0	1	1	0	0	0	0	1028	984	813	845	844	824	926	954
ENSG00000067057.18_PFKP	2147	2077	1870	1927	1583	1616	1722	1670	2075	2097	1831	1874	2390	2429	2516	2548
ENSG00000067064.12_IDI1	429	436	411	385	347	376	381	365	375	342	308	345	597	560	629	577
ENSG00000067066.17_SP100	1131	1121	997	1024	847	831	914	870	444	442	354	364	487	484	539	556
ENSG00000067082.15_KLF6	729	670	642	618	496	503	538	519	4198	4229	3587	3657	3121	3111	3377	3352
ENSG00000067113.17_PLPP1	131	97	128	108	196	179	181	180	255	245	228	234	294	305	300	312
ENSG00000067141.17_NEO1	1324	1265	1160	1114	1248	1258	1361	1352	943	933	808	777	940	976	1067	1032
ENSG00000067167.8_TRAM1	3122	3085	2948	2962	4783	4958	4901	5062	1800	1869	1543	1539	2714	2773	2906	3090
ENSG00000067177.15_PHKA1	692	678	613	581	458	448	487	513	619	558	480	472	491	564	585	623
ENSG00000067182.8_TNFRSF1A	1172	1211	1136	1081	1389	1375	1465	1382	1119	1166	978	1013	1335	1388	1471	1436
ENSG00000067191.16_CACNB1	192	180	145	186	149	126	133	164	365	333	341	277	223	211	214	236
ENSG00000067208.15_EVI5	239	251	249	233	174	167	150	166	170	164	118	149	194	183	231	198
ENSG00000067221.14_STOML1	82	68	76	67	130	108	120	125	103	118	90	91	147	121	143	155
ENSG00000067225.19_PKM	27353	27409	24061	23977	22999	22712	24912	24830	15068	15189	13226	13446	19635	19750	20784	20939
ENSG00000067248.10_DHX29	677	584	557	621	401	437	439	401	312	338	261	287	376	404	401	451
ENSG00000067334.14_DNTTIP2	1935	1938	1716	1792	1430	1460	1530	1505	564	595	529	526	706	647	677	716
ENSG00000067365.15_METTL22	104	121	100	98	96	85	98	97	216	223	188	193	213	219	218	243
ENSG00000067369.14_TP53BP1	856	813	777	670	518	533	586	586	934	942	772	803	833	800	927	877
ENSG00000067445.21_TRO	0	0	1	0	0	0	0	0	2	1	0	1	2	1	0	1
ENSG00000067533.6_RRP15	154	139	131	134	131	108	130	122	187	186	165	169	203	190	214	194
ENSG00000067560.14_RHOA	4133	4130	3744	3801	3670	3761	3874	3876	3547	3586	3273	3118	5311	5336	5643	5544
ENSG00000067596.12_DHX8	815	775	704	660	456	458	525	515	553	561	480	464	531	509	562	577
ENSG00000067601.8_PMS2P4	7	6	4	10	4	10	7	7	17	19	13	10	9	11	15	16
ENSG00000067606.17_PRKCZ	280	271	247	240	193	197	216	205	413	396	335	375	418	408	440	436
ENSG00000067646.12_ZFY	0	0	0	0	0	0	0	0	99	95	71	63	85	79	107	106
ENSG00000067704.10_IARS2	2813	2717	2402	2496	3193	3167	3416	3402	1415	1536	1165	1247	1564	1555	1771	1731
ENSG00000067715.14_SYT1	0	0	0	0	0	6	6	1	0	0	0	0	0	0	0	1
ENSG00000067798.16_NAV3	2014	1967	1767	1840	1234	1242	1325	1269	41	37	27	24	64	69	74	87
ENSG00000067829.19_IDH3G	509	546	484	516	455	475	453	477	418	430	386	386	513	447	492	499
ENSG00000067836.13_ROGDI	92	99	107	85	82	79	84	63	290	311	276	271	246	275	273	258
ENSG00000067840.13_PDZD4	0	0	0	0	0	0	1	0	0	0	2	0	3	1	2	0
ENSG00000067842.18_ATP2B3	0	0	0	0	0	0	0	0	0	0	0	0	0	0	0	0
ENSG00000067900.8_ROCK1	621	626	556	509	374	389	422	448	1191	1159	967	923	1177	1136	1351	1288
ENSG00000067955.15_CBFB	1700	1670	1601	1566	1254	1252	1228	1278	822	834	749	734	858	903	942	891
ENSG00000067992.16_PDK3	243	259	247	226	167	196	195	166	145	117	101	114	140	146	163	157
ENSG00000068001.14_HYAL2	435	420	398	380	559	501	549	565	1004	936	858	849	1350	1334	1424	1426
ENSG00000068024.17_HDAC4	110	97	92	93	76	59	73	73	253	256	219	241	279	289	300	287
ENSG00000068028.18_RASSF1	250	263	217	226	177	185	206	198	196	166	143	181	167	184	182	181
ENSG00000068078.20_FGFR3	215	225	199	173	191	171	221	189	304	294	252	247	79	89	94	104
ENSG00000068079.8_IFI35	93	78	99	87	70	73	63	55	52	58	58	49	69	75	69	74
ENSG00000068097.15_HEATR6	231	258	224	229	200	208	210	208	274	281	222	209	278	261	318	315
ENSG00000068120.15_COASY	1310	1324	1266	1234	1027	1018	992	1031	1418	1473	1250	1353	1602	1536	1669	1584
ENSG00000068137.15_PLEKHH3	392	457	378	376	305	352	340	366	982	972	897	833	826	819	877	843
ENSG00000068305.17_MEF2A	369	366	348	339	248	258	253	254	305	288	266	244	313	303	336	330
ENSG00000068308.14_OTUD5	894	974	800	818	603	649	675	718	832	899	760	748	845	831	868	916
ENSG00000068323.17_TFE3	1310	1287	1201	1205	929	846	885	920	719	722	611	633	686	719	756	753
ENSG00000068354.16_TBC1D25	129	140	125	113	108	113	120	117	251	274	225	231	262	248	257	287
ENSG00000068366.21_ACSL4	1676	1693	1531	1600	1863	1732	1837	1862	326	315	274	243	457	434	514	484
ENSG00000068383.19_INPP5A	214	169	162	179	135	135	143	144	151	131	135	114	192	175	209	179
ENSG00000068394.11_GPKOW	288	272	294	243	174	196	185	170	327	318	295	259	394	379	422	412
ENSG00000068400.13_GRIPAP1	681	688	621	633	476	444	480	471	764	785	699	698	601	647	616	658
ENSG00000068438.15_FTSJ1	373	415	344	341	306	278	320	325	191	215	181	173	207	234	222	248
ENSG00000068489.13_PRR11	342	360	309	311	270	241	280	275	420	416	356	350	499	493	554	529
ENSG00000068615.19_REEP1	44	31	29	27	37	37	47	46	3	5	0	2	8	9	10	11
ENSG00000068650.19_ATP11A	1275	1368	1123	1091	1013	980	1159	1129	1085	1082	849	895	966	897	1041	1102
ENSG00000068654.17_POLR1A	1685	1718	1504	1550	1080	1074	1152	1137	1278	1233	1021	1010	943	924	1077	1083
ENSG00000068697.7_LAPTM4A	1799	1806	1597	1604	2955	2976	3156	3171	1637	1720	1632	1536	2437	2435	2506	2429
ENSG00000068724.17_TTC7A	268	262	230	229	167	152	171	186	1169	1188	1001	1026	1284	1318	1448	1358
ENSG00000068745.15_IP6K2	638	684	595	615	512	567	590	531	1266	1243	1134	1093	876	873	923	886
ENSG00000068781.21_STON1-GTF2A1L	0	0	0	0	0	0	0	0	0	0	0	0	0	0	0	0
ENSG00000068784.13_SRBD1	156	147	141	108	101	106	131	114	332	326	297	288	320	293	296	343
ENSG00000068796.19_KIF2A	903	968	787	818	681	625	755	714	529	579	467	461	629	630	704	681
ENSG00000068831.19_RASGRP2	1	0	1	1	1	1	0	0	5	4	2	5	7	8	9	4
ENSG00000068878.15_PSME4	1580	1608	1389	1408	1128	1065	1190	1208	1001	961	758	813	1091	1031	1207	1209
ENSG00000068885.15_IFT80	254	226	220	252	217	209	209	198	217	241	175	178	220	230	256	273
ENSG00000068903.20_SIRT2	239	217	209	191	162	174	166	201	130	135	115	100	158	135	160	170
ENSG00000068912.14_ERLEC1	520	514	450	435	618	610	698	652	766	717	690	705	1229	1212	1248	1248
ENSG00000068971.14_PPP2R5B	173	185	133	164	125	113	132	148	216	196	192	180	255	251	266	259
ENSG00000068976.14_PYGM	1	1	1	1	0	1	3	2	22	20	17	19	24	22	27	22
ENSG00000068985.5_PAGE1	0	0	0	0	0	0	0	0	0	0	0	0	0	0	0	0
ENSG00000069011.16_PITX1	371	356	323	283	220	221	251	268	254	242	240	242	292	296	280	293
ENSG00000069018.19_TRPC7	0	0	0	0	0	0	0	0	0	1	0	0	0	0	0	1
ENSG00000069020.18_MAST4	2411	2542	2160	2070	2051	1968	2224	2277	103	91	73	59	89	68	107	101
ENSG00000069122.19_ADGRF5	0	0	0	0	0	0	0	0	0	0	0	0	0	0	0	0
ENSG00000069188.17_SDK2	1	0	1	0	3	0	3	2	0	0	0	0	0	0	0	0
ENSG00000069206.15_ADAM7	0	0	0	0	0	0	0	0	0	0	0	0	0	0	0	0
ENSG00000069248.12_NUP133	685	711	626	663	610	582	590	637	518	518	439	419	537	572	608	625
ENSG00000069275.13_NUCKS1	1160	1189	1047	1061	834	858	920	878	3360	3351	2894	2775	3412	3315	3658	3710
ENSG00000069329.18_VPS35	598	623	524	519	519	515	571	585	655	612	550	556	912	892	960	965
ENSG00000069345.12_DNAJA2	1202	1273	1123	1099	957	1004	1016	1067	924	931	717	801	1180	1088	1287	1245
ENSG00000069399.15_BCL3	49	56	38	46	25	25	32	33	117	108	105	100	127	104	137	98
ENSG00000069424.15_KCNAB2	1458	1420	1310	1261	1070	1044	1111	1149	160	145	138	149	140	125	126	129
ENSG00000069431.13_ABCC9	0	0	1	0	0	0	1	0	1	1	1	1	0	0	0	1
ENSG00000069482.7_GAL	709	669	628	646	736	744	781	750	119	130	109	116	117	125	132	116
ENSG00000069493.15_CLEC2D	21	23	16	18	17	9	9	25	55	57	56	50	40	46	48	34
ENSG00000069509.6_FUNDC1	147	169	151	152	157	158	161	153	92	95	115	107	149	157	132	131
ENSG00000069535.14_MAOB	0	0	0	0	0	0	0	0	61	76	52	60	35	25	34	39
ENSG00000069667.16_RORA	35	51	34	36	29	30	38	32	1258	1232	957	985	1110	1056	1282	1276
ENSG00000069696.7_DRD4	1	3	6	1	6	1	2	2	10	9	4	6	5	7	12	6
ENSG00000069702.11_TGFBR3	70	59	70	75	101	89	91	81	651	649	547	519	663	657	745	736
ENSG00000069764.10_PLA2G10	0	0	0	0	0	0	0	0	21	14	15	15	23	13	17	24
ENSG00000069812.11_HES2	0	0	0	0	0	0	0	0	80	86	81	71	89	92	106	79
ENSG00000069849.11_ATP1B3	2286	2076	1904	1948	2960	2855	3122	3114	1395	1419	1238	1193	1865	1923	2045	2025
ENSG00000069869.17_NEDD4	613	581	501	553	484	530	558	537	405	412	318	356	469	437	509	500
ENSG00000069943.10_PIGB	121	99	92	93	130	139	141	156	158	135	113	119	160	161	186	183
ENSG00000069956.13_MAPK6	571	556	523	516	432	404	438	420	382	409	354	322	467	452	499	498
ENSG00000069966.19_GNB5	198	201	177	154	129	151	177	151	284	291	212	229	384	366	421	448
ENSG00000069974.16_RAB27A	94	98	101	95	72	95	84	68	106	112	93	79	115	128	145	135
ENSG00000069998.12_HDHD5	989	995	977	949	904	942	897	905	494	427	425	425	560	527	563	543
ENSG00000070010.19_UFD1	927	894	807	835	772	825	841	847	400	407	355	343	523	540	551	593
ENSG00000070018.9_LRP6	996	989	838	920	905	936	1013	967	1217	1197	960	1005	951	919	1056	1086
ENSG00000070019.5_GUCY2C	0	0	0	0	0	0	0	0	5	2	6	8	11	15	9	11
ENSG00000070031.4_SCT	2	0	0	0	0	0	0	0	6	3	5	6	6	2	3	0
ENSG00000070047.13_PHRF1	1365	1270	1226	1163	859	837	882	894	1816	1898	1638	1603	1531	1501	1562	1658
ENSG00000070061.16_ELP1	1594	1544	1285	1324	968	1001	1148	1169	726	694	599	601	630	687	743	701
ENSG00000070081.17_NUCB2	502	491	512	510	804	775	762	771	608	604	570	555	850	803	798	892
ENSG00000070087.14_PFN2	158	153	146	169	171	165	168	152	722	677	616	630	1091	1102	1184	1132
ENSG00000070159.14_PTPN3	610	569	502	512	375	387	444	413	734	753	620	597	731	671	825	756
ENSG00000070182.21_SPTB	6	4	1	2	1	1	2	5	1813	1716	1494	1480	899	904	1030	987
ENSG00000070190.13_DAPP1	1	0	0	0	0	0	0	0	18	9	3	14	36	43	42	49
ENSG00000070193.5_FGF10	0	0	0	0	0	0	0	0	0	0	0	0	0	0	0	0
ENSG00000070214.16_SLC44A1	840	874	791	781	1019	1043	1065	1088	1411	1363	1194	1229	1858	1833	1935	2000
ENSG00000070269.14_TMEM260	183	140	155	143	201	179	194	200	451	468	369	382	443	420	475	500
ENSG00000070366.14_SMG6	457	458	399	416	295	294	311	322	351	339	318	279	285	283	307	302
ENSG00000070367.16_EXOC5	1012	939	844	803	666	681	763	782	421	402	394	371	628	561	624	594
ENSG00000070371.16_CLTCL1	99	111	85	70	71	69	84	100	173	161	148	157	188	168	157	205
ENSG00000070388.11_FGF22	0	3	3	0	1	1	0	0	1	3	1	2	1	1	3	3
ENSG00000070404.10_FSTL3	366	368	311	388	359	345	345	360	707	643	602	590	680	721	744	732
ENSG00000070413.20_DGCR2	1180	1144	1041	1049	1372	1360	1490	1404	2092	2132	1883	1882	2133	2104	2189	2233
ENSG00000070423.18_RNF126	733	715	704	645	599	605	626	598	646	641	530	579	655	587	651	686
ENSG00000070444.15_MNT	454	459	410	388	242	257	271	283	421	454	359	362	387	400	452	433
ENSG00000070476.15_ZXDC	198	171	168	156	131	118	137	134	200	221	160	172	191	185	206	233
ENSG00000070495.15_JMJD6	723	734	650	671	552	531	552	584	227	240	222	190	280	304	305	313
ENSG00000070501.12_POLB	121	133	128	127	131	129	125	125	106	92	105	88	194	181	188	191
ENSG00000070526.15_ST6GALNAC1	0	0	0	0	0	0	0	0	50	46	43	32	97	120	116	126
ENSG00000070540.13_WIPI1	153	163	128	152	95	102	111	104	176	168	128	155	213	236	257	242
ENSG00000070601.10_FRMPD1	1	0	3	1	0	0	0	0	0	0	1	1	3	1	0	1
ENSG00000070610.14_GBA2	970	1015	898	826	778	754	832	859	903	929	783	778	729	720	787	794
ENSG00000070614.15_NDST1	1026	969	929	930	825	888	859	886	584	587	474	528	537	551	593	586
ENSG00000070669.17_ASNS	373	404	348	404	281	297	282	273	2362	2398	1987	2044	4210	4337	4671	4607
ENSG00000070718.12_AP3M2	220	230	180	205	177	188	205	205	141	137	103	101	118	120	144	153
ENSG00000070729.14_CNGB1	0	0	0	0	0	0	0	0	0	0	0	1	0	1	0	2
ENSG00000070731.11_ST6GALNAC2	0	0	1	1	0	0	0	0	179	206	150	171	261	241	298	255
ENSG00000070748.19_CHAT	0	0	0	0	0	0	0	0	0	0	0	0	0	0	0	0
ENSG00000070756.17_PABPC1	43199	43565	36331	36398	33629	33647	37655	37688	20735	21454	16932	16835	22566	22592	25447	25407
ENSG00000070759.17_TESK2	28	26	25	17	14	17	19	21	61	60	50	46	44	50	60	52
ENSG00000070761.8_CFAP20	852	833	744	817	702	757	749	748	266	256	257	259	409	417	422	395
ENSG00000070770.10_CSNK2A2	768	755	717	665	563	575	567	626	315	342	263	284	328	355	359	398
ENSG00000070778.13_PTPN21	146	141	139	150	117	115	118	95	114	119	95	97	164	155	178	176
ENSG00000070785.17_EIF2B3	220	202	166	189	205	207	235	231	183	178	161	163	242	253	260	258
ENSG00000070808.17_CAMK2A	0	0	0	0	0	0	0	0	0	0	1	0	0	0	0	0
ENSG00000070814.22_TCOF1	4396	4392	3972	4008	2786	2756	2926	2862	1830	1923	1638	1556	1556	1536	1656	1716
ENSG00000070831.17_CDC42	1460	1389	1436	1397	1547	1514	1468	1479	1118	1106	983	997	1840	1882	1945	1992
ENSG00000070882.13_OSBPL3	347	352	290	280	282	319	346	355	462	457	382	406	373	373	405	404
ENSG00000070886.12_EPHA8	0	0	0	0	0	0	0	0	0	0	0	0	0	0	0	0
ENSG00000070915.10_SLC12A3	0	0	0	0	0	0	0	0	0	0	0	0	1	5	0	6
ENSG00000070950.10_RAD18	565	505	462	479	378	388	392	443	198	207	190	164	257	248	270	268
ENSG00000070961.16_ATP2B1	557	536	461	451	580	558	609	675	1890	1876	1519	1493	1419	1391	1675	1611
ENSG00000070985.13_TRPM5	1	0	0	0	0	0	0	0	136	138	131	115	75	67	71	72
ENSG00000071051.14_NCK2	343	333	297	309	209	200	215	223	342	357	279	303	313	359	373	374
ENSG00000071054.16_MAP4K4	2035	1983	1841	1725	1262	1145	1285	1317	1074	1013	819	887	831	873	941	997
ENSG00000071073.13_MGAT4A	106	100	99	115	104	131	105	113	530	497	454	414	666	686	758	715
ENSG00000071082.11_RPL31	6937	6937	6562	6460	5176	4962	5088	5062	5894	5953	5369	5226	5473	5470	5676	5673
ENSG00000071127.17_WDR1	4732	4782	4051	4084	3287	3201	3703	3628	2823	2847	2521	2565	3280	3189	3381	3358
ENSG00000071189.21_SNX13	566	544	536	526	643	627	652	625	761	697	579	600	673	733	815	786
ENSG00000071203.9_MS4A12	0	0	0	0	0	0	0	0	0	0	0	0	0	0	0	0
ENSG00000071205.12_ARHGAP10	177	190	159	155	119	122	140	133	142	134	120	128	152	142	143	164
ENSG00000071242.12_RPS6KA2	32	33	22	18	18	17	24	30	188	160	143	159	182	191	203	196
ENSG00000071243.16_ING3	279	258	190	218	199	211	267	249	125	133	111	93	143	122	153	153
ENSG00000071246.11_VASH1	2	7	4	5	5	0	2	2	8	8	9	7	5	5	6	2
ENSG00000071282.12_LMCD1	2	3	3	1	2	1	0	3	213	228	187	179	300	314	326	352
ENSG00000071462.12_BUD23	1368	1350	1260	1315	1575	1503	1602	1517	1030	995	886	922	1090	1154	1144	1200
ENSG00000071537.14_SEL1L	1290	1199	1061	1136	1476	1504	1629	1573	981	1004	762	789	1019	976	1174	1153
ENSG00000071539.14_TRIP13	396	382	342	337	273	319	340	310	208	188	175	176	208	229	233	226
ENSG00000071553.18_ATP6AP1	1976	1908	1681	1739	2225	2377	2485	2469	1634	1730	1526	1541	1664	1709	1712	1731
ENSG00000071564.17_TCF3	1678	1657	1422	1449	958	1005	1115	1104	1607	1562	1328	1336	1311	1293	1462	1417
ENSG00000071575.12_TRIB2	42	35	25	26	27	17	38	30	202	236	171	186	198	183	222	212
ENSG00000071626.17_DAZAP1	3373	3458	3131	3115	2319	2356	2369	2473	1774	1711	1596	1565	1858	1863	1949	1880
ENSG00000071655.18_MBD3	1648	1636	1568	1604	1318	1298	1230	1305	1362	1282	1253	1282	1250	1181	1198	1132
ENSG00000071677.1_PRLH	0	0	0	0	0	0	0	0	0	0	0	0	0	0	0	0
ENSG00000071794.16_HLTF	0	0	0	0	0	0	0	1	69	64	47	48	59	61	69	82
ENSG00000071859.15_FAM50A	893	855	825	872	628	640	596	610	993	948	903	910	956	1003	954	998
ENSG00000071889.17_FAM3A	510	470	443	454	476	455	481	488	405	437	394	373	469	466	487	473
ENSG00000071894.17_CPSF1	2458	2498	2231	2234	1932	1940	2028	2066	1961	1998	1709	1727	1546	1490	1638	1603
ENSG00000071909.19_MYO3B	0	0	0	0	0	0	0	0	0	0	1	1	6	6	5	5
ENSG00000071967.12_CYBRD1	0	0	0	0	0	0	2	3	318	349	300	311	388	384	391	400
ENSG00000071991.9_CDH19	0	0	0	0	0	0	0	0	0	0	0	0	0	0	0	0
ENSG00000071994.11_PDCD2	663	651	602	612	601	646	636	651	460	410	356	354	482	524	575	553
ENSG00000072041.18_SLC6A15	0	0	0	0	0	0	0	0	0	0	0	0	0	0	0	0
ENSG00000072042.13_RDH11	2095	2132	1905	1909	2520	2477	2621	2658	2143	2212	1909	2001	2660	2590	2726	2750
ENSG00000072062.15_PRKACA	879	912	841	892	798	797	824	733	618	627	606	613	750	727	698	728
ENSG00000072071.16_ADGRL1	671	654	555	636	491	472	524	498	747	787	709	700	662	692	688	673
ENSG00000072080.11_SPP2	0	0	0	0	0	0	0	0	0	0	0	0	0	0	0	0
ENSG00000072110.16_ACTN1	7535	7402	6444	6284	4942	4916	5559	5649	2136	2165	1852	1836	2398	2464	2661	2592
ENSG00000072121.17_ZFYVE26	754	690	684	623	441	457	451	492	311	338	235	268	278	265	323	324
ENSG00000072133.11_RPS6KA6	0	0	0	0	0	0	0	0	41	48	32	35	44	43	50	55
ENSG00000072134.15_EPN2	443	440	410	427	282	330	290	313	581	554	491	462	521	504	573	557
ENSG00000072135.13_PTPN18	256	272	236	241	209	196	227	200	412	418	374	390	469	427	467	444
ENSG00000072163.20_LIMS2	0	0	1	0	0	0	0	0	0	1	1	2	0	0	1	1
ENSG00000072182.13_ASIC4	0	0	0	0	0	0	1	1	4	6	4	3	6	3	8	3
ENSG00000072195.15_SPEG	0	0	1	0	0	0	2	1	4	4	3	3	4	2	6	4
ENSG00000072201.14_LNX1	6	2	2	4	5	2	5	3	219	241	176	194	288	248	319	289
ENSG00000072210.19_ALDH3A2	509	500	482	476	368	385	376	368	1512	1488	1334	1330	1422	1428	1462	1519
ENSG00000072274.13_TFRC	4111	4058	3725	3717	5259	5185	5491	5470	1715	1766	1410	1378	1609	1716	1866	1949
ENSG00000072310.18_SREBF1	1927	1900	1705	1736	2005	2003	2124	2122	4626	4662	3933	3891	3958	3995	4391	4374
ENSG00000072315.4_TRPC5	1	0	0	0	0	0	1	0	0	0	0	1	1	1	2	0
ENSG00000072364.13_AFF4	998	1005	893	893	693	680	750	723	1118	1160	893	921	1037	1056	1177	1241
ENSG00000072401.15_UBE2D1	252	241	252	243	213	182	170	194	169	174	136	152	215	235	242	250
ENSG00000072415.10_MPP5	591	568	500	565	493	441	493	472	511	459	368	387	599	605	695	689
ENSG00000072422.17_RHOBTB1	10	20	9	14	8	8	9	13	95	78	72	86	106	92	102	101
ENSG00000072501.19_SMC1A	4465	4516	3939	3869	2869	2949	3261	3194	2570	2438	2011	2040	1907	1901	2208	2188
ENSG00000072506.14_HSD17B10	921	874	842	857	862	823	854	840	469	466	425	451	589	608	595	615
ENSG00000072518.22_MARK2	1086	1111	980	977	712	725	752	789	730	750	632	660	787	705	813	772
ENSG00000072571.20_HMMR	41	35	39	27	29	24	30	30	285	261	221	207	312	301	352	357
ENSG00000072609.18_CHFR	8	9	7	11	11	4	7	9	4	4	3	0	1	1	3	1
ENSG00000072657.10_TRHDE	0	0	0	0	1	0	0	0	0	0	0	0	1	0	0	0
ENSG00000072682.20_P4HA2	579	613	535	533	707	775	769	806	1594	1517	1322	1388	1726	1679	1843	1790
ENSG00000072694.21_FCGR2B	0	0	0	0	0	0	0	0	0	0	0	0	0	0	0	0
ENSG00000072736.19_NFATC3	520	482	464	430	326	310	334	347	210	210	207	172	185	176	195	176
ENSG00000072756.17_TRNT1	382	374	354	346	339	330	348	338	175	208	156	165	214	196	220	233
ENSG00000072778.20_ACADVL	4761	4736	4278	4368	3897	3820	3952	4110	12891	13229	11475	11468	7647	7648	8052	7935
ENSG00000072786.13_STK10	835	871	758	745	539	562	612	590	287	311	251	253	330	330	349	373
ENSG00000072803.18_FBXW11	808	730	726	747	583	617	563	611	377	348	292	322	445	473	514	486
ENSG00000072818.12_ACAP1	5	0	0	1	1	3	3	1	4	7	4	3	3	0	3	3
ENSG00000072832.15_CRMP1	103	105	97	96	51	49	55	45	0	0	0	0	2	0	0	0
ENSG00000072840.13_EVC	787	783	656	734	403	357	415	415	0	0	0	0	13	13	12	16
ENSG00000072849.11_DERL2	332	386	335	327	514	525	536	547	183	206	181	174	262	253	268	263
ENSG00000072858.11_SIDT1	14	10	11	8	6	3	6	7	103	97	86	72	79	81	92	95
ENSG00000072864.16_NDE1	207	193	157	169	109	117	133	143	170	188	146	150	164	169	201	173
ENSG00000072952.20_IRAG1	0	0	0	0	0	0	1	2	6	0	4	4	6	3	4	1
ENSG00000072954.7_TMEM38A	49	50	52	55	58	59	55	51	60	69	57	43	84	72	97	81
ENSG00000072958.9_AP1M1	431	386	340	399	263	327	295	326	292	329	267	281	357	382	413	368
ENSG00000073008.15_PVR	2303	2154	2048	2104	2340	2393	2448	2411	1469	1577	1375	1308	1879	1930	2030	2007
ENSG00000073050.12_XRCC1	433	383	369	392	253	276	287	244	350	342	317	340	375	402	386	386
ENSG00000073060.17_SCARB1	1426	1474	1297	1382	1798	1824	1922	1839	564	560	488	511	574	554	591	591
ENSG00000073067.14_CYP2W1	2	1	0	0	1	0	0	1	1	1	5	0	1	0	2	1
ENSG00000073111.14_MCM2	2704	2763	2461	2537	1999	2058	2145	2065	1226	1180	996	1081	1113	1087	1167	1197
ENSG00000073146.16_MOV10L1	1	0	0	1	0	0	1	1	0	0	0	0	0	1	1	0
ENSG00000073150.14_PANX2	0	0	0	0	0	0	0	0	329	299	272	250	370	354	397	403
ENSG00000073169.14_SELENOO	649	663	586	593	533	516	553	559	404	402	370	364	376	364	382	370
ENSG00000073282.14_TP63	0	0	0	0	0	0	1	1	0	0	0	1	0	1	0	0
ENSG00000073331.18_ALPK1	115	97	71	101	57	64	63	87	144	154	126	134	223	194	217	230
ENSG00000073350.14_LLGL2	479	504	467	452	382	391	387	393	2741	2774	2426	2384	2593	2408	2657	2663
ENSG00000073417.15_PDE8A	329	333	306	322	239	241	238	236	339	350	289	302	327	327	347	362
ENSG00000073464.13_CLCN4	1	0	0	0	0	0	0	0	188	178	136	157	172	195	205	216
ENSG00000073536.18_NLE1	637	644	570	600	501	519	502	562	220	227	172	186	190	176	207	215
ENSG00000073578.17_SDHA	1879	1836	1675	1737	1741	1797	1827	1844	1972	1983	1709	1788	1885	1905	1944	2037
ENSG00000073584.20_SMARCE1	1644	1617	1410	1510	1103	1094	1200	1141	1162	1146	959	1034	1108	1156	1199	1233
ENSG00000073598.6_FNDC8	1	2	2	0	1	0	0	0	0	0	0	1	0	0	1	1
ENSG00000073605.19_GSDMB	37	26	28	16	24	25	31	35	219	219	195	193	166	155	172	162
ENSG00000073614.13_KDM5A	1327	1386	1177	1243	931	834	944	948	492	472	397	381	498	485	581	537
ENSG00000073670.14_ADAM11	17	18	13	20	11	7	10	6	63	67	63	59	39	45	44	35
ENSG00000073711.11_PPP2R3A	82	101	64	79	55	54	65	75	25	19	21	17	32	31	31	37
ENSG00000073712.15_FERMT2	0	0	0	0	0	0	3	1	1	1	3	2	6	1	3	2
ENSG00000073734.10_ABCB11	0	0	0	0	0	0	0	0	1	0	0	0	0	0	1	0
ENSG00000073737.17_DHRS9	0	0	0	0	0	0	1	0	1	0	1	0	0	2	0	0
ENSG00000073754.6_CD5L	0	0	0	0	0	1	0	0	0	0	0	0	0	0	0	0
ENSG00000073756.13_PTGS2	0	0	1	0	0	0	0	0	24	27	21	12	47	48	56	59
ENSG00000073792.16_IGF2BP2	1167	1189	1034	1064	644	663	717	691	1178	1163	952	995	1260	1216	1361	1385
ENSG00000073803.14_MAP3K13	166	139	155	146	124	131	116	125	180	223	172	174	262	284	310	279
ENSG00000073849.16_ST6GAL1	279	290	276	257	278	313	300	304	8	6	4	7	19	15	19	19
ENSG00000073861.3_TBX21	0	0	0	0	0	0	0	0	0	0	0	0	0	0	0	0
ENSG00000073905.8_VDAC1P1	0	0	0	0	0	0	1	1	1	0	0	0	1	0	0	0
ENSG00000073910.23_FRY	0	2	1	1	1	3	0	0	1	1	9	3	4	7	1	0
ENSG00000073921.18_PICALM	1189	1215	1049	1104	841	836	858	929	1178	1112	957	916	1098	1153	1253	1283
ENSG00000073969.18_NSF	563	554	438	504	385	383	462	419	473	470	389	407	507	518	535	586
ENSG00000074047.22_GLI2	0	0	0	0	0	0	0	0	32	35	29	32	50	34	40	47
ENSG00000074054.20_CLASP1	863	853	751	761	556	583	624	616	927	982	737	730	763	722	897	902
ENSG00000074071.15_MRPS34	1394	1303	1239	1288	964	1016	978	1010	803	722	692	701	883	853	900	880
ENSG00000074181.9_NOTCH3	20	11	11	12	6	13	13	14	701	665	598	563	461	484	518	519
ENSG00000074201.9_CLNS1A	1011	1043	928	956	977	924	1020	954	649	616	539	575	729	704	761	754
ENSG00000074211.14_PPP2R2C	0	1	0	0	0	0	0	0	3	7	6	4	6	5	7	3
ENSG00000074219.14_TEAD2	222	196	194	179	159	159	155	185	191	175	136	172	157	167	182	176
ENSG00000074266.22_EED	519	521	465	498	410	446	457	419	245	287	246	224	300	275	296	311
ENSG00000074276.10_CDHR2	0	1	2	1	0	1	2	0	4	10	3	5	3	0	4	5
ENSG00000074317.11_SNCB	0	0	0	0	0	0	0	0	0	0	0	0	0	0	0	1
ENSG00000074319.13_TSG101	437	460	377	404	383	343	395	402	448	473	425	418	708	683	701	739
ENSG00000074356.17_NCBP3	576	619	505	527	387	436	456	462	711	746	648	603	662	636	693	708
ENSG00000074370.18_ATP2A3	0	0	1	0	1	0	0	0	39	51	27	38	15	10	20	21
ENSG00000074410.14_CA12	86	100	71	111	101	104	98	103	22	30	23	21	11	14	16	12
ENSG00000074416.15_MGLL	77	65	71	63	106	126	120	118	451	531	453	430	729	727	783	743
ENSG00000074527.13_NTN4	13	19	15	13	19	12	16	18	1185	1218	985	995	1372	1314	1545	1448
ENSG00000074582.15_BCS1L	393	393	344	338	331	340	364	374	278	282	267	267	246	241	244	224
ENSG00000074590.14_NUAK1	138	134	110	119	74	75	76	99	335	348	327	249	413	404	445	449
ENSG00000074603.19_DPP8	342	357	339	303	266	252	283	251	408	399	373	352	455	451	483	462
ENSG00000074621.14_SLC24A1	93	90	76	67	81	92	108	100	179	199	169	196	148	163	139	151
ENSG00000074657.14_ZNF532	0	0	0	0	0	0	0	0	120	143	102	105	117	102	122	135
ENSG00000074660.16_SCARF1	1055	1046	961	952	1101	1003	1148	1055	12	12	13	14	14	10	11	10
ENSG00000074695.6_LMAN1	247	219	203	202	241	235	266	252	4159	4177	3498	3534	4236	4290	4622	4725
ENSG00000074696.13_HACD3	3398	3522	3246	3190	4681	4530	4734	4793	2267	2240	1908	1861	2437	2382	2660	2656
ENSG00000074706.13_IPCEF1	0	0	0	0	0	0	0	0	2	2	1	0	0	0	0	0
ENSG00000074755.15_ZZEF1	796	830	740	680	555	498	578	583	753	782	640	627	649	597	742	661
ENSG00000074771.4_NOX3	0	0	0	0	0	0	0	0	0	0	0	0	0	0	0	0
ENSG00000074800.16_ENO1	25033	24980	22515	22190	21297	21627	22921	22849	8235	8166	7265	7199	11223	11046	11821	11780
ENSG00000074803.20_SLC12A1	0	0	0	0	0	0	0	0	0	0	0	0	0	0	0	0
ENSG00000074842.8_MYDGF	4027	3935	3837	3808	5706	5580	5691	5739	2558	2489	2318	2261	3060	3142	3199	3221
ENSG00000074855.11_ANO8	224	225	212	215	229	209	203	235	1090	1175	1029	928	903	906	996	946
ENSG00000074935.14_TUBE1	83	111	85	77	94	88	112	93	227	234	199	229	248	224	238	236
ENSG00000074964.17_ARHGEF10L	288	259	258	243	182	196	176	216	580	577	452	479	384	380	459	439
ENSG00000074966.11_TXK	3	4	3	3	0	1	1	3	7	5	7	5	10	13	9	14
ENSG00000075035.10_WSCD2	0	0	0	0	0	0	0	0	0	0	0	0	0	0	0	0
ENSG00000075043.20_KCNQ2	0	0	0	0	1	0	0	0	1	0	0	0	1	4	3	4
ENSG00000075073.15_TACR2	0	0	0	0	0	0	0	1	2	4	3	1	3	1	3	3
ENSG00000075089.10_ACTR6	242	236	222	236	236	225	219	238	198	211	156	176	223	223	259	244
ENSG00000075131.10_TIPIN	204	177	171	170	170	175	185	184	88	80	58	60	87	98	111	116
ENSG00000075142.14_SRI	769	753	730	755	813	877	827	838	343	334	272	300	534	530	582	575
ENSG00000075151.23_EIF4G3	1095	1161	1001	1009	708	819	805	833	1724	1724	1421	1368	1280	1293	1506	1468
ENSG00000075188.9_NUP37	253	230	223	228	271	267	289	263	229	227	197	201	361	340	389	359
ENSG00000075213.11_SEMA3A	1585	1587	1439	1432	1670	1734	1823	1763	363	388	288	310	465	433	516	506
ENSG00000075218.19_GTSE1	633	687	568	588	408	418	461	448	341	361	302	284	379	383	417	424
ENSG00000075223.14_SEMA3C	44	53	45	44	47	53	54	50	180	168	132	140	166	164	207	179
ENSG00000075234.17_TTC38	365	372	331	331	308	315	326	336	165	162	151	124	147	147	165	159
ENSG00000075239.14_ACAT1	997	994	899	897	919	972	998	1000	551	563	525	522	600	645	623	621
ENSG00000075240.17_GRAMD4	550	580	492	542	452	474	480	480	458	444	404	431	364	423	378	405
ENSG00000075275.18_CELSR1	0	0	0	3	1	1	0	3	1923	1928	1597	1594	1564	1612	1742	1820
ENSG00000075290.8_WNT8B	1	0	0	2	0	0	0	1	6	3	5	3	3	1	3	3
ENSG00000075292.19_ZNF638	1561	1512	1431	1402	1515	1598	1623	1601	2348	2311	1950	1925	2027	1981	2268	2203
ENSG00000075303.13_SLC25A40	126	116	103	124	126	102	114	118	133	120	123	104	175	178	188	182
ENSG00000075336.12_TIMM21	719	692	644	628	738	726	748	799	250	243	205	186	264	286	311	319
ENSG00000075340.23_ADD2	0	0	0	1	0	0	0	0	0	0	0	1	0	0	1	0
ENSG00000075388.4_FGF4	0	0	0	0	0	0	0	0	0	0	1	0	0	0	0	0
ENSG00000075391.17_RASAL2	252	261	284	230	177	167	155	151	209	241	184	190	193	188	216	210
ENSG00000075399.14_VPS9D1	162	158	136	137	130	111	139	131	276	281	236	262	242	252	239	274
ENSG00000075407.18_ZNF37A	753	740	668	677	512	490	529	530	300	297	245	266	234	249	263	263
ENSG00000075413.19_MARK3	1089	1038	904	982	692	658	729	730	814	795	718	750	929	886	909	955
ENSG00000075415.15_SLC25A3	3735	3853	3637	3624	4200	4146	4265	4103	2908	2879	2579	2610	4110	3984	4223	4262
ENSG00000075420.13_FNDC3B	476	504	437	440	322	327	342	350	567	574	475	441	598	622	697	692
ENSG00000075426.12_FOSL2	96	97	80	97	67	64	73	64	2090	2140	1826	1842	1818	1860	1987	1948
ENSG00000075429.9_CACNG5	0	0	0	0	0	0	0	0	0	1	0	0	0	1	0	0
ENSG00000075461.6_CACNG4	0	0	0	0	0	0	0	0	175	178	149	152	178	178	190	197
ENSG00000075539.15_FRYL	390	378	313	357	277	256	300	287	422	423	329	346	380	369	440	426
ENSG00000075568.17_TMEM131	1257	1239	1158	1174	1333	1305	1400	1300	655	586	453	513	556	545	646	655
ENSG00000075618.18_FSCN1	3298	3422	3155	3076	2548	2573	2645	2577	919	935	841	830	1185	1241	1244	1286
ENSG00000075624.17_ACTB	38715	38667	34044	34213	27718	27774	30248	29993	18118	18155	15348	15396	20869	21100	22818	22929
ENSG00000075643.6_MOCOS	547	539	466	478	385	380	419	427	455	491	389	400	591	585	652	645
ENSG00000075651.16_PLD1	12	5	11	7	9	13	12	7	293	275	221	247	283	261	316	293
ENSG00000075673.12_ATP12A	1	0	0	0	0	1	1	1	4	3	11	5	9	6	3	2
ENSG00000075702.19_WDR62	798	807	744	689	617	632	668	666	357	330	292	299	289	313	333	316
ENSG00000075711.21_DLG1	630	610	535	524	433	395	478	461	1190	1190	1060	991	1445	1419	1526	1557
ENSG00000075785.14_RAB7A	4462	4533	4022	3793	2620	2657	2971	2917	2256	2286	1958	1977	2680	2671	2906	2829
ENSG00000075790.12_BCAP29	875	863	797	831	1295	1312	1319	1372	335	294	280	272	407	428	451	437
ENSG00000075826.17_SEC31B	50	57	49	47	31	28	39	25	319	286	254	260	151	162	169	177
ENSG00000075856.12_SART3	1624	1649	1362	1417	1121	1136	1286	1284	1076	1129	854	887	1034	1014	1168	1214
ENSG00000075884.14_ARHGAP15	0	0	0	0	0	0	1	0	0	0	0	0	0	0	0	0
ENSG00000075886.11_TUBA3D	0	3	3	1	0	1	0	0	3	1	0	4	0	4	3	2
ENSG00000075891.23_PAX2	61	61	59	54	43	47	56	35	0	0	1	1	1	0	0	2
ENSG00000075914.13_EXOSC7	629	664	580	565	549	556	572	619	285	307	264	286	351	376	361	377
ENSG00000075945.13_KIFAP3	193	181	183	170	204	213	217	209	56	65	68	52	89	86	81	91
ENSG00000075975.17_MKRN2	417	389	400	394	364	354	363	325	418	458	409	372	508	543	548	554
ENSG00000076003.5_MCM6	1747	1681	1598	1563	1359	1353	1423	1365	910	1021	850	871	1025	1064	1123	1062
ENSG00000076043.11_REXO2	976	1085	977	905	871	857	882	917	793	813	731	780	1081	1060	1091	1073
ENSG00000076053.12_RBM7	273	236	248	225	235	237	217	266	137	125	111	142	208	216	233	194
ENSG00000076067.13_RBMS2	506	513	436	432	340	295	347	377	1350	1315	1082	1085	1784	1754	1990	1962
ENSG00000076108.12_BAZ2A	4510	4563	3961	3995	2594	2531	2805	2848	3044	3092	2553	2594	2777	2743	3010	3091
ENSG00000076201.16_PTPN23	872	898	758	771	713	694	807	752	1415	1492	1213	1283	1464	1472	1560	1609
ENSG00000076242.16_MLH1	1	0	0	0	0	0	0	1	307	335	324	311	414	444	420	412
ENSG00000076248.11_UNG	888	890	855	897	784	837	795	756	524	526	488	451	613	668	669	672
ENSG00000076258.10_FMO4	7	8	7	7	12	11	11	10	5	7	9	9	15	10	4	17
ENSG00000076321.11_KLHL20	198	208	192	196	210	161	185	183	201	192	177	143	243	237	266	270
ENSG00000076344.16_RGS11	237	250	224	208	185	207	224	197	107	125	85	101	65	69	79	81
ENSG00000076351.13_SLC46A1	529	545	528	515	657	620	657	615	363	380	345	328	322	338	325	347
ENSG00000076356.7_PLXNA2	127	129	114	107	111	104	127	111	333	372	299	284	222	201	249	234
ENSG00000076382.17_SPAG5	1228	1230	1142	1109	811	786	825	824	738	723	608	581	657	668	765	741
ENSG00000076513.17_ANKRD13A	801	839	737	729	553	605	626	611	293	199	167	193	250	225	302	279
ENSG00000076554.16_TPD52	1531	1659	1446	1486	1151	1182	1160	1241	769	807	692	713	1104	1145	1202	1167
ENSG00000076555.15_ACACB	66	76	66	58	52	49	61	50	170	184	141	140	120	112	149	128
ENSG00000076604.15_TRAF4	765	759	667	666	638	649	719	687	1346	1324	1151	1149	1240	1173	1323	1275
ENSG00000076641.4_PAG1	11	7	13	6	12	7	10	8	226	210	173	171	177	173	206	206
ENSG00000076650.7_GPATCH1	197	196	170	158	125	109	124	151	145	120	108	123	95	122	122	109
ENSG00000076662.10_ICAM3	56	61	68	54	58	53	36	64	21	37	24	30	49	42	53	41
ENSG00000076685.19_NT5C2	337	302	275	289	254	274	281	293	937	952	811	836	1404	1366	1511	1446
ENSG00000076706.17_MCAM	0	0	0	0	0	0	2	3	8	8	3	7	11	4	12	9
ENSG00000076716.9_GPC4	508	519	474	468	630	597	638	643	285	253	216	226	257	249	272	296
ENSG00000076770.15_MBNL3	171	159	128	143	109	102	140	112	109	86	74	70	96	86	102	121
ENSG00000076826.10_CAMSAP3	521	485	462	441	345	324	360	351	516	483	469	449	489	489	513	476
ENSG00000076864.20_RAP1GAP	69	70	57	51	71	60	82	78	169	148	159	142	193	215	206	203
ENSG00000076924.12_XAB2	736	689	604	621	529	509	608	554	817	833	752	710	913	844	918	929
ENSG00000076928.18_ARHGEF1	1499	1567	1370	1344	1052	1024	1107	1140	1345	1333	1142	1227	1325	1347	1403	1405
ENSG00000076944.16_STXBP2	533	534	504	474	384	396	392	414	1571	1516	1344	1389	1577	1591	1704	1625
ENSG00000076984.18_MAP2K7	1390	1329	1216	1214	829	847	905	888	770	825	695	694	621	647	643	706
ENSG00000077009.13_NMRK2	0	0	0	0	0	0	1	0	0	0	0	0	0	0	0	0
ENSG00000077044.11_DGKD	532	505	510	454	335	340	340	341	1900	1932	1649	1654	1299	1325	1431	1395
ENSG00000077063.11_CTTNBP2	84	93	77	73	61	55	57	75	37	29	27	35	31	29	30	30
ENSG00000077080.10_ACTL6B	0	0	0	0	0	0	0	0	0	0	0	0	0	0	0	0
ENSG00000077092.19_RARB	1	3	0	0	0	1	3	1	2	0	0	0	0	0	0	0
ENSG00000077097.16_TOP2B	2576	2620	2343	2324	1583	1557	1638	1695	1253	1359	1131	1182	1175	1026	1135	1165
ENSG00000077147.16_TM9SF3	3613	3493	3288	3294	4429	4414	4560	4600	3655	3600	3170	3103	3702	3830	4005	4081
ENSG00000077150.20_NFKB2	1276	1319	1218	1109	980	1032	1077	1063	963	936	853	847	1281	1280	1360	1326
ENSG00000077152.11_UBE2T	334	340	334	291	288	308	306	303	145	139	119	97	190	223	231	242
ENSG00000077157.22_PPP1R12B	138	133	138	134	90	88	86	74	230	210	184	196	177	209	205	211
ENSG00000077232.19_DNAJC10	1609	1669	1422	1493	1881	1817	2011	1943	1783	1886	1476	1551	1829	1825	2045	2039
ENSG00000077235.18_GTF3C1	3413	3427	3072	3093	2981	2993	3157	3158	2694	2710	2157	2202	2337	2263	2668	2616
ENSG00000077238.14_IL4R	482	471	497	466	457	506	434	473	736	715	634	655	654	663	689	688
ENSG00000077254.14_USP33	460	406	390	380	363	379	395	401	449	475	411	394	531	559	581	583
ENSG00000077264.16_PAK3	0	0	0	0	0	0	0	0	0	0	0	0	0	1	0	0
ENSG00000077274.9_CAPN6	0	0	0	0	0	0	0	0	0	0	0	0	1	0	0	0
ENSG00000077279.20_DCX	0	0	0	0	0	0	0	0	0	0	0	0	0	0	0	1
ENSG00000077312.9_SNRPA	1035	924	925	890	756	781	788	783	592	583	534	545	588	674	644	642
ENSG00000077327.16_SPAG6	1	0	0	0	0	2	0	0	0	0	1	0	0	0	0	0
ENSG00000077348.9_EXOSC5	288	307	302	294	324	292	277	312	141	135	116	135	159	148	159	157
ENSG00000077380.16_DYNC1I2	678	652	577	563	549	579	642	617	983	973	796	819	1282	1249	1434	1369
ENSG00000077420.16_APBB1IP	0	0	0	0	4	0	0	1	0	0	0	0	0	1	0	0
ENSG00000077454.16_LRCH4	537	463	440	480	348	378	382	365	1312	1284	1112	1177	1107	1185	1197	1213
ENSG00000077458.13_FAM76B	131	115	123	103	106	115	120	108	182	196	164	188	140	144	136	140
ENSG00000077463.15_SIRT6	518	502	471	462	402	392	403	421	422	399	410	392	556	521	529	525
ENSG00000077498.9_TYR	0	0	0	0	0	0	0	0	0	0	0	0	0	0	0	0
ENSG00000077514.9_POLD3	216	222	218	212	170	173	170	154	249	275	225	208	249	241	282	267
ENSG00000077522.15_ACTN2	0	0	0	0	0	0	0	0	1	0	0	0	1	0	0	0
ENSG00000077549.19_CAPZB	2050	2011	1852	1874	1576	1612	1631	1666	1696	1623	1526	1513	1918	1969	2019	1964
ENSG00000077585.14_GPR137B	133	112	102	128	141	134	136	144	169	144	116	117	153	155	167	207
ENSG00000077616.11_NAALAD2	1	3	1	1	0	2	1	3	2	4	1	1	1	3	5	1
ENSG00000077684.16_JADE1	563	516	508	451	381	385	415	410	318	310	273	231	265	225	286	282
ENSG00000077713.19_SLC25A43	178	196	152	151	117	128	137	159	72	71	65	67	98	102	98	108
ENSG00000077721.16_UBE2A	480	545	458	465	425	451	464	463	389	397	361	349	526	560	575	557
ENSG00000077782.22_FGFR1	2234	2249	1949	1966	1998	2004	2186	2181	923	924	767	786	722	768	827	820
ENSG00000077800.13_FKBP6	1	1	0	1	0	0	0	0	1	1	0	0	0	1	3	0
ENSG00000077935.17_SMC1B	0	0	0	1	0	0	0	0	2	7	1	0	2	1	3	6
ENSG00000077942.19_FBLN1	0	0	0	0	0	0	0	0	4	1	1	3	1	2	1	1
ENSG00000077943.8_ITGA8	0	0	0	0	0	0	0	0	0	0	0	0	0	0	0	0
ENSG00000077984.6_CST7	1	1	0	0	0	0	0	0	732	703	656	655	951	996	1013	1000
ENSG00000078018.21_MAP2	2	0	0	0	0	0	0	0	169	201	155	160	426	366	417	440
ENSG00000078043.16_PIAS2	282	290	252	237	179	207	207	228	178	213	189	173	183	235	218	203
ENSG00000078053.17_AMPH	0	0	0	0	0	0	0	0	0	0	0	0	0	1	0	0
ENSG00000078061.14_ARAF	442	454	382	396	346	358	380	396	462	505	471	469	510	548	519	500
ENSG00000078070.13_MCCC1	439	436	396	403	354	318	350	350	231	198	194	160	199	197	226	221
ENSG00000078081.8_LAMP3	0	0	0	0	0	0	0	0	269	278	231	220	377	354	395	414
ENSG00000078098.14_FAP	0	0	0	0	0	0	0	0	0	1	0	0	0	1	1	0
ENSG00000078114.19_NEBL	1	0	0	0	0	0	1	0	1127	1173	987	955	932	907	989	1034
ENSG00000078124.13_ACER3	477	452	453	438	591	552	573	578	364	376	276	309	430	429	491	490
ENSG00000078140.14_UBE2K	1998	1963	1793	1802	1402	1453	1497	1493	1258	1257	1096	1099	1440	1502	1559	1576
ENSG00000078142.13_PIK3C3	410	448	351	401	336	370	402	367	220	233	193	212	246	290	286	271
ENSG00000078177.14_N4BP2	288	301	270	245	226	242	251	261	159	155	116	106	117	113	147	154
ENSG00000078237.7_TIGAR	698	679	649	626	587	656	629	649	165	185	127	141	230	242	259	289
ENSG00000078246.17_TULP3	559	521	481	441	322	359	394	382	617	610	527	522	689	658	704	757
ENSG00000078269.15_SYNJ2	201	208	167	189	131	105	123	140	609	585	476	478	475	447	522	553
ENSG00000078295.17_ADCY2	0	0	0	0	0	0	0	0	0	0	0	0	0	0	1	1
ENSG00000078304.19_PPP2R5C	829	799	707	686	587	630	683	686	944	891	734	785	1095	1001	1177	1145
ENSG00000078319.10_PMS2P1	74	76	75	76	74	75	74	66	41	55	48	41	71	83	80	81
ENSG00000078328.23_RBFOX1	0	0	0	0	0	0	0	0	0	0	0	0	0	0	0	0
ENSG00000078369.18_GNB1	3945	3730	3614	3538	2814	2736	2790	2818	3024	2956	2556	2610	3663	3542	3868	3873
ENSG00000078399.19_HOXA9	806	823	792	758	592	568	604	533	863	820	755	754	1028	1016	1015	1120
ENSG00000078401.7_EDN1	0	0	0	0	0	0	0	0	26	31	28	32	36	45	42	33
ENSG00000078403.17_MLLT10	272	273	238	233	181	197	212	209	476	500	394	392	414	409	471	477
ENSG00000078487.18_ZCWPW1	28	29	24	24	18	13	18	19	40	31	27	29	30	38	45	33
ENSG00000078549.15_ADCYAP1R1	4	7	4	7	35	27	32	31	0	0	0	0	0	0	0	0
ENSG00000078579.9_FGF20	0	0	0	0	0	0	0	0	1	5	1	3	0	0	0	4
ENSG00000078589.13_P2RY10	0	0	0	0	0	0	0	0	0	0	0	0	0	0	1	0
ENSG00000078596.11_ITM2A	0	0	0	0	0	0	0	0	0	0	0	0	8	0	7	0
ENSG00000078618.22_NRDC	1162	1130	976	1027	778	856	908	887	1658	1757	1442	1416	1584	1566	1721	1765
ENSG00000078668.14_VDAC3	1857	1740	1696	1720	1894	1901	1902	1924	561	610	561	530	839	859	876	861
ENSG00000078674.18_PCM1	1235	1337	1204	1170	877	883	900	898	1110	1189	891	1020	986	958	1061	1111
ENSG00000078687.17_TNRC6C	175	191	159	173	115	96	117	105	332	355	324	291	285	267	297	271
ENSG00000078699.22_CBFA2T2	269	260	250	275	206	209	181	206	465	400	358	319	356	346	427	406
ENSG00000078725.13_BRINP1	0	0	0	0	0	0	0	0	0	0	0	0	0	0	0	0
ENSG00000078747.16_ITCH	762	794	766	681	646	664	674	663	514	528	425	432	649	615	698	708
ENSG00000078795.17_PKD2L2	0	0	0	0	0	0	0	0	0	0	0	0	0	0	0	0
ENSG00000078804.13_TP53INP2	540	550	447	502	351	334	379	379	448	419	398	381	466	448	475	473
ENSG00000078808.19_SDF4	2906	2746	2491	2462	2947	2872	3149	3158	2871	2857	2444	2448	2899	2788	3131	3041
ENSG00000078814.17_MYH7B	5	3	3	5	6	0	6	2	63	76	64	70	43	39	33	39
ENSG00000078898.7_BPIFB2	0	0	0	0	0	0	0	0	0	0	0	0	0	0	0	0
ENSG00000078900.15_TP73	381	393	317	353	265	256	263	317	223	195	189	186	163	196	187	183
ENSG00000078902.16_TOLLIP	572	601	494	540	433	429	478	459	600	606	536	499	635	641	688	689
ENSG00000078967.13_UBE2D4	96	95	82	90	78	80	71	95	52	63	47	42	65	65	68	84
ENSG00000079101.16_CLUL1	0	0	0	0	0	0	1	0	1	2	1	1	9	4	7	7
ENSG00000079102.16_RUNX1T1	0	0	0	0	0	0	0	1	0	0	0	0	0	0	0	0
ENSG00000079112.10_CDH17	0	1	0	0	1	0	0	0	3160	3129	2516	2664	4460	4495	4969	4939
ENSG00000079134.12_THOC1	358	388	343	331	272	319	323	299	228	268	231	212	279	253	272	285
ENSG00000079150.18_FKBP7	86	79	63	55	85	80	102	105	65	60	52	63	77	77	78	79
ENSG00000079156.17_OSBPL6	0	1	0	0	0	0	0	0	24	30	30	23	29	25	25	24
ENSG00000079215.15_SLC1A3	0	0	0	0	0	0	0	1	101	113	101	89	372	386	386	422
ENSG00000079246.16_XRCC5	3753	3681	3413	3381	3361	3408	3529	3525	1981	2097	1811	1756	2563	2602	2729	2772
ENSG00000079257.8_LXN	66	83	80	71	67	71	62	67	34	40	28	31	41	34	44	41
ENSG00000079263.19_SP140	5	6	3	6	5	5	8	2	6	7	6	6	3	6	4	3
ENSG00000079277.22_MKNK1	214	222	199	199	232	215	245	223	501	495	452	476	478	531	535	472
ENSG00000079308.20_TNS1	49	45	50	45	36	41	39	32	116	115	83	105	74	85	100	85
ENSG00000079313.15_REXO1	1006	943	869	888	655	660	698	689	546	595	514	506	511	513	534	528
ENSG00000079332.15_SAR1A	1062	1089	1021	1004	1231	1214	1250	1242	1067	1063	983	936	1293	1300	1341	1356
ENSG00000079335.20_CDC14A	121	86	76	84	73	65	88	86	122	108	81	85	82	99	116	113
ENSG00000079337.16_RAPGEF3	34	38	39	34	29	39	34	29	48	44	54	41	59	63	55	62
ENSG00000079385.23_CEACAM1	1	1	0	1	1	0	1	0	54	41	34	33	29	20	36	35
ENSG00000079387.14_SENP1	497	494	466	436	328	347	356	349	124	124	115	105	117	142	135	138
ENSG00000079393.21_DUSP13	0	0	0	0	0	0	0	0	1	4	1	1	2	2	3	3
ENSG00000079432.9_CIC	1294	1288	1109	1135	797	840	921	898	903	921	730	754	778	780	871	904
ENSG00000079435.10_LIPE	151	140	131	143	102	102	107	96	56	46	39	55	82	77	73	91
ENSG00000079459.13_FDFT1	2329	2365	2157	2092	2130	2101	2213	2240	2561	2474	2126	2170	4507	4481	4900	4821
ENSG00000079462.8_PAFAH1B3	420	391	383	431	417	377	376	372	214	219	207	216	376	306	336	340
ENSG00000079482.14_OPHN1	94	89	94	102	77	72	54	69	144	120	115	125	155	176	190	154
ENSG00000079557.5_AFM	0	0	0	0	0	0	0	0	0	0	0	0	0	0	0	0
ENSG00000079616.13_KIF22	995	1018	926	910	768	716	755	789	755	760	677	708	745	740	780	729
ENSG00000079689.14_SCGN	0	0	0	0	0	0	0	0	0	0	0	0	0	0	0	0
ENSG00000079691.18_CARMIL1	280	234	217	210	139	158	158	195	338	354	280	302	329	300	346	345
ENSG00000079739.17_PGM1	332	316	281	306	334	316	328	357	394	392	355	384	664	644	646	693
ENSG00000079785.16_DDX1	1991	2032	1876	1821	1681	1661	1752	1702	1543	1550	1347	1336	1728	1729	1885	1819
ENSG00000079805.19_DNM2	1838	1887	1686	1673	1261	1259	1322	1338	4158	4232	3653	3653	3606	3628	3866	3836
ENSG00000079819.19_EPB41L2	2724	2611	2383	2367	2026	2096	2212	2207	3108	2956	2569	2607	2623	2523	2825	2770
ENSG00000079841.18_RIMS1	0	0	0	0	0	0	0	0	0	0	0	0	0	0	0	0
ENSG00000079931.15_MOXD1	0	0	0	0	0	0	0	1	0	0	0	0	5	1	6	0
ENSG00000079950.14_STX7	187	195	183	211	170	197	166	166	322	301	315	274	374	446	407	418
ENSG00000079974.18_RABL2B	391	371	327	353	292	289	315	307	208	223	210	191	187	201	199	186
ENSG00000079999.14_KEAP1	1306	1270	1172	1171	902	920	942	960	820	819	715	765	878	873	856	954
ENSG00000080007.8_DDX43	0	0	0	1	0	0	0	0	0	1	0	0	0	0	0	1
ENSG00000080031.10_PTPRH	1	0	3	0	1	0	1	0	90	89	77	89	144	138	155	135
ENSG00000080166.16_DCT	0	0	1	2	11	7	5	11	5	4	3	0	3	1	3	5
ENSG00000080189.15_SLC35C2	752	738	678	696	804	803	818	847	530	548	470	460	615	610	653	665
ENSG00000080200.10_CRYBG3	534	557	507	483	439	432	461	453	448	474	355	381	285	301	362	334
ENSG00000080224.17_EPHA6	0	0	0	0	0	0	0	0	0	0	0	0	0	0	0	0
ENSG00000080293.10_SCTR	0	0	0	0	0	0	1	0	0	0	0	0	0	0	0	0
ENSG00000080298.16_RFX3	62	84	69	76	62	69	68	57	57	65	49	43	47	59	69	61
ENSG00000080345.18_RIF1	1251	1283	1164	1132	952	882	934	990	727	769	586	565	572	546	683	676
ENSG00000080371.6_RAB21	1031	1043	923	929	756	734	825	768	733	691	664	682	881	837	869	849
ENSG00000080493.18_SLC4A4	0	0	0	1	1	0	0	0	2	2	0	1	2	2	0	1
ENSG00000080503.24_SMARCA2	1246	1272	1070	1137	793	755	815	888	1098	1014	940	839	869	880	939	991
ENSG00000080511.5_RDH8	0	0	0	0	1	0	5	1	0	0	0	0	0	0	0	0
ENSG00000080546.13_SESN1	135	125	116	99	107	120	122	137	59	65	48	47	63	57	83	60
ENSG00000080561.14_MID2	159	157	131	140	109	106	110	132	168	172	132	147	168	176	188	199
ENSG00000080572.13_DNAAF6	0	0	0	0	0	0	0	0	0	0	0	0	0	0	0	0
ENSG00000080573.7_COL5A3	4	0	5	3	9	14	5	17	1	1	0	0	1	3	4	4
ENSG00000080603.17_SRCAP	1208	1171	998	1053	528	536	586	637	479	493	383	371	348	314	410	396
ENSG00000080608.10_PUM3	812	818	705	736	606	589	650	646	355	358	308	284	331	362	383	388
ENSG00000080618.17_CPB2	0	2	0	0	0	0	0	0	0	0	1	1	1	1	0	0
ENSG00000080644.16_CHRNA3	11	6	8	11	7	15	10	9	9	10	9	6	9	5	7	9
ENSG00000080709.16_KCNN2	2	3	3	0	3	2	4	4	14	14	10	14	14	17	15	17
ENSG00000080802.19_CNOT4	331	323	290	286	242	235	263	256	140	166	147	163	216	215	212	201
ENSG00000080815.19_PSEN1	827	830	730	694	961	938	999	1084	1102	1053	923	911	1129	1189	1256	1264
ENSG00000080819.9_CPOX	962	932	877	890	828	798	814	841	2898	2857	2529	2460	2888	2940	3153	3087
ENSG00000080822.17_CLDND1	724	742	709	696	963	1026	1028	985	3065	3052	2641	2663	4442	4407	4775	4712
ENSG00000080823.23_MOK	116	129	102	112	109	97	119	106	18	18	13	24	18	24	18	20
ENSG00000080824.19_HSP90AA1	32054	32425	28689	28693	25370	25291	27013	27316	12158	12423	10408	10273	14421	14478	15759	15905
ENSG00000080839.12_RBL1	574	573	491	524	458	495	518	509	175	177	138	151	154	165	187	171
ENSG00000080845.19_DLGAP4	913	851	771	777	582	600	645	650	779	827	712	685	887	826	930	901
ENSG00000080854.16_IGSF9B	287	291	249	244	206	212	230	243	229	217	190	199	198	182	207	197
ENSG00000080910.13_CFHR2	0	0	0	0	0	0	0	0	0	0	0	0	0	0	0	0
ENSG00000080947.15_CROCCP3	40	42	34	32	37	24	38	32	74	71	59	65	39	41	51	35
ENSG00000080986.13_NDC80	251	274	251	238	195	213	222	193	176	155	145	127	167	187	188	208
ENSG00000081014.11_AP4E1	278	294	257	278	201	214	198	219	130	134	129	132	148	154	141	148
ENSG00000081019.13_RSBN1	181	228	171	184	187	161	185	199	155	148	135	134	199	185	217	187
ENSG00000081026.19_MAGI3	98	90	84	90	65	75	67	75	259	288	232	200	186	211	238	233
ENSG00000081041.9_CXCL2	12	10	8	8	5	7	9	10	23	25	23	13	64	49	69	59
ENSG00000081051.8_AFP	0	0	0	0	0	0	0	0	0	0	0	0	0	0	0	0
ENSG00000081052.14_COL4A4	1	0	1	0	0	0	1	1	11	14	9	9	10	7	11	12
ENSG00000081059.20_TCF7	211	189	182	173	108	111	114	123	199	190	161	156	187	178	220	193
ENSG00000081087.15_OSTM1	668	707	635	631	975	939	996	1001	256	274	209	242	399	401	452	415
ENSG00000081138.14_CDH7	0	0	0	0	0	0	0	0	4	1	3	4	1	1	2	2
ENSG00000081148.12_IMPG2	0	0	1	1	1	1	1	2	2	1	3	1	4	3	3	5
ENSG00000081154.12_PCNP	1639	1612	1522	1583	1407	1332	1354	1352	874	881	764	709	1111	1088	1188	1221
ENSG00000081177.18_EXD2	460	430	378	387	542	536	588	591	562	537	496	469	656	629	683	680
ENSG00000081181.8_ARG2	318	343	299	304	328	332	364	326	32	40	48	42	119	106	107	105
ENSG00000081189.16_MEF2C	2	0	0	0	0	0	0	1	309	296	244	257	246	249	287	268
ENSG00000081237.20_PTPRC	1	0	0	0	0	0	3	2	2	0	1	1	0	2	0	1
ENSG00000081248.12_CACNA1S	0	0	0	0	0	0	0	0	0	1	0	0	0	0	0	0
ENSG00000081277.13_PKP1	0	0	0	0	0	0	0	0	8	8	5	5	17	13	17	20
ENSG00000081307.15_UBA5	538	533	483	459	388	381	432	405	550	534	493	507	613	593	574	649
ENSG00000081320.11_STK17B	126	140	129	133	133	124	117	131	443	488	374	411	571	613	615	679
ENSG00000081377.17_CDC14B	457	459	412	451	310	313	299	319	256	264	202	227	278	238	292	285
ENSG00000081386.13_ZNF510	262	258	261	247	220	231	217	214	127	147	129	104	114	138	131	144
ENSG00000081479.15_LRP2	0	0	0	0	1	0	0	0	1	2	1	1	2	2	0	1
ENSG00000081665.14_ZNF506	139	169	132	168	139	156	134	154	6	4	5	5	8	1	3	4
ENSG00000081692.13_JMJD4	204	211	210	221	224	215	203	198	243	223	243	215	269	280	250	277
ENSG00000081721.12_DUSP12	307	284	267	295	266	258	235	289	162	174	153	152	204	192	206	204
ENSG00000081760.17_AACS	226	232	220	196	165	203	192	193	701	731	594	546	548	517	624	628
ENSG00000081791.9_DELE1	494	489	472	463	393	420	417	388	771	802	681	670	629	677	689	721
ENSG00000081800.9_SLC13A1	0	0	0	0	0	0	0	0	0	0	0	0	0	0	0	0
ENSG00000081803.16_CADPS2	76	72	68	71	52	51	51	52	28	20	15	14	23	29	33	37
ENSG00000081818.4_PCDHB4	5	12	8	5	5	4	6	6	0	0	0	0	0	0	0	0
ENSG00000081842.18_PCDHA6	0	0	0	0	0	0	0	0	0	0	0	0	0	0	0	0
ENSG00000081853.15_PCDHGA2	5	8	8	5	5	3	4	3	1	0	0	0	0	0	0	0
ENSG00000081870.12_HSPB11	266	287	283	282	259	262	241	238	818	799	733	717	1158	1099	1209	1157
ENSG00000081913.14_PHLPP1	266	283	235	219	159	161	191	190	372	330	313	294	291	287	310	312
ENSG00000081923.15_ATP8B1	1	3	0	1	1	0	3	4	882	830	709	678	739	775	845	883
ENSG00000081985.13_IL12RB2	4	3	4	4	6	5	4	3	14	19	16	13	6	13	10	11
ENSG00000082014.17_SMARCD3	593	608	545	530	448	477	498	487	172	191	175	166	171	162	157	168
ENSG00000082068.9_WDR70	218	230	195	214	171	180	190	178	209	215	177	172	241	235	244	289
ENSG00000082074.19_FYB1	0	0	0	0	0	0	1	0	0	2	0	0	1	0	0	1
ENSG00000082126.18_MPP4	0	0	0	0	0	0	0	1	3	0	1	1	0	0	2	3
ENSG00000082146.13_STRADB	261	277	275	299	285	318	272	264	39	41	42	32	45	51	57	44
ENSG00000082153.18_BZW1	1857	1827	1801	1785	1979	1955	1899	1973	1683	1720	1396	1454	2177	2197	2400	2400
ENSG00000082175.15_PGR	0	0	0	0	0	0	0	0	0	0	0	0	0	0	0	0
ENSG00000082196.21_C1QTNF3	1	1	2	0	0	3	1	1	8	6	7	13	11	7	3	6
ENSG00000082212.13_ME2	1135	1074	1011	1014	910	876	870	980	571	556	460	473	690	685	745	778
ENSG00000082213.18_C5orf22	159	190	173	177	153	160	129	163	179	179	163	177	255	279	272	269
ENSG00000082258.13_CCNT2	306	308	298	285	286	292	302	277	380	404	342	310	403	378	431	437
ENSG00000082269.17_FAM135A	0	0	0	0	0	0	0	0	180	158	132	134	216	194	223	248
ENSG00000082293.13_COL19A1	0	0	0	0	0	0	0	0	3	3	1	0	0	2	3	4
ENSG00000082397.18_EPB41L3	0	0	0	0	0	0	2	0	2	1	3	1	2	2	1	1
ENSG00000082438.18_COBLL1	83	62	59	62	54	57	67	60	142	118	120	104	132	130	138	144
ENSG00000082458.12_DLG3	527	505	447	470	334	317	363	338	923	918	740	762	777	736	876	848
ENSG00000082482.14_KCNK2	0	0	0	0	0	0	0	0	0	0	0	0	0	0	0	0
ENSG00000082497.12_SERTAD4	0	0	0	0	0	0	0	0	64	86	60	57	110	104	138	103
ENSG00000082512.15_TRAF5	168	152	145	173	136	142	138	126	253	263	205	221	194	197	215	227
ENSG00000082515.18_MRPL22	566	568	555	551	546	549	510	557	315	310	278	301	498	456	489	494
ENSG00000082516.9_GEMIN5	935	928	827	822	621	607	669	662	268	242	203	204	262	267	295	309
ENSG00000082556.14_OPRK1	0	0	0	0	0	0	0	0	0	0	0	0	0	0	0	0
ENSG00000082641.16_NFE2L1	3270	3358	3118	2956	3273	3255	3424	3368	5779	5800	5065	5009	5431	5687	5980	5882
ENSG00000082684.16_SEMA5B	0	0	0	0	0	0	0	0	0	1	0	2	3	1	3	2
ENSG00000082701.17_GSK3B	843	892	813	771	572	584	584	615	841	823	667	700	956	996	1081	1095
ENSG00000082781.12_ITGB5	730	802	776	779	817	778	766	729	4626	4679	4139	4166	6447	6198	6669	6621
ENSG00000082805.20_ERC1	724	748	632	653	409	393	429	463	417	423	322	318	325	335	405	397
ENSG00000082898.19_XPO1	3176	3138	2950	2886	2826	2845	2957	2879	3119	3092	2600	2541	3275	3345	3688	3674
ENSG00000082929.8_LINC01587	0	0	0	0	0	0	0	0	0	0	0	0	0	0	0	0
ENSG00000082996.20_RNF13	221	239	186	219	336	293	349	327	442	449	345	399	601	639	664	697
ENSG00000083067.24_TRPM3	0	0	0	0	0	0	0	0	1	2	4	0	1	1	0	0
ENSG00000083093.10_PALB2	372	330	336	321	237	238	230	246	141	135	112	113	148	130	137	176
ENSG00000083097.15_DOP1A	120	105	95	84	87	96	99	123	146	155	129	123	97	85	103	100
ENSG00000083099.11_LYRM2	261	286	255	247	232	206	219	232	208	256	218	185	281	302	299	323
ENSG00000083123.15_BCKDHB	134	147	134	133	130	127	129	131	144	163	153	149	185	194	174	193
ENSG00000083168.11_KAT6A	1598	1572	1384	1432	929	898	989	983	844	800	621	675	715	773	858	878
ENSG00000083223.18_TUT7	658	627	545	568	389	393	458	416	377	397	307	295	310	291	370	350
ENSG00000083290.20_ULK2	204	223	178	188	138	127	145	155	153	140	124	123	122	138	156	130
ENSG00000083307.12_GRHL2	0	0	1	1	0	0	0	0	818	796	669	678	809	769	857	891
ENSG00000083312.19_TNPO1	1948	2073	1819	1785	1669	1611	1714	1775	1740	1766	1320	1354	2011	2093	2443	2361
ENSG00000083444.17_PLOD1	2506	2446	2251	2232	2727	2624	2845	2793	2189	2154	1888	1853	2297	2313	2526	2439
ENSG00000083454.22_P2RX5	269	291	254	271	207	242	235	218	104	96	79	84	105	104	122	113
ENSG00000083457.12_ITGAE	24	25	22	27	24	25	22	24	16	17	16	13	17	15	19	17
ENSG00000083520.15_DIS3	1228	1286	1153	1126	998	1033	1048	1085	746	728	665	639	809	853	880	870
ENSG00000083535.16_PIBF1	127	147	114	137	93	105	89	119	139	141	123	141	180	178	180	180
ENSG00000083544.16_TDRD3	126	116	119	107	70	86	82	75	120	108	97	87	121	107	117	144
ENSG00000083622.8_AC000111.6	0	0	0	0	0	0	0	0	0	0	0	0	0	0	0	0
ENSG00000083635.8_NUFIP1	186	185	186	182	165	151	150	150	94	96	92	90	145	106	136	114
ENSG00000083642.19_PDS5B	772	740	638	701	566	529	596	587	249	231	197	212	221	231	256	237
ENSG00000083720.13_OXCT1	1615	1613	1430	1475	1605	1526	1602	1712	339	287	290	250	326	361	387	350
ENSG00000083750.13_RRAGB	129	137	119	88	100	83	117	111	138	140	123	135	137	151	150	140
ENSG00000083782.8_EPYC	0	0	0	0	0	0	0	0	0	0	0	0	0	0	0	0
ENSG00000083799.18_CYLD	457	470	411	428	285	335	359	292	147	137	123	139	171	175	179	176
ENSG00000083807.10_SLC27A5	89	88	81	70	77	84	82	98	14	15	16	21	28	22	20	20
ENSG00000083812.12_ZNF324	184	230	203	145	141	132	154	163	201	234	160	192	178	162	208	183
ENSG00000083814.13_ZNF671	1	1	2	0	1	0	0	3	3	2	1	1	1	0	0	1
ENSG00000083817.9_ZNF416	59	65	63	60	54	74	56	68	58	58	58	35	46	51	54	61
ENSG00000083828.16_ZNF586	5	3	7	10	14	6	6	5	61	65	51	59	66	78	82	70
ENSG00000083838.16_ZNF446	87	90	68	63	72	64	86	88	181	159	147	134	137	116	145	141
ENSG00000083844.10_ZNF264	166	141	135	143	132	126	145	125	103	105	76	79	91	75	95	109
ENSG00000083845.9_RPS5	6210	6294	6029	6216	8842	8778	8924	8749	2993	2866	2745	2881	4834	4819	4862	4920
ENSG00000083857.14_FAT1	1410	1385	1139	1206	1000	1014	1166	1149	32237	32231	25144	25262	27058	26780	32219	32040
ENSG00000083896.13_YTHDC1	1017	1087	942	991	715	695	698	753	1046	1101	957	978	1102	1000	1110	1057
ENSG00000083937.10_CHMP2B	480	445	431	413	346	361	351	385	424	433	360	399	635	616	660	664
ENSG00000084070.12_SMAP2	623	578	518	493	412	447	507	478	103	83	78	87	119	111	132	111
ENSG00000084072.17_PPIE	399	394	369	380	373	377	345	410	352	384	335	359	330	376	349	345
ENSG00000084073.10_ZMPSTE24	1048	1063	1012	981	1774	1782	1827	1837	650	614	538	545	921	914	1008	975
ENSG00000084090.14_STARD7	1723	1773	1714	1605	1513	1551	1508	1547	1246	1261	1114	1081	1431	1428	1510	1531
ENSG00000084092.7_NOA1	445	418	405	424	358	411	383	376	428	396	340	364	406	412	433	454
ENSG00000084093.19_REST	596	554	518	522	421	464	455	477	451	443	357	354	535	579	611	653
ENSG00000084110.11_HAL	6	6	6	3	6	5	7	10	7	3	7	1	7	5	8	6
ENSG00000084112.15_SSH1	1079	1003	891	930	598	572	621	675	730	710	569	598	688	650	770	752
ENSG00000084207.18_GSTP1	3070	3039	2783	2721	2726	2753	2917	2877	2310	2282	2174	2255	3134	3244	3144	3195
ENSG00000084234.18_APLP2	6868	6786	5965	5968	6934	7008	7562	7583	12165	12168	10212	10365	12451	12470	13492	13771
ENSG00000084444.14_FAM234B	368	385	345	345	466	509	516	503	107	101	84	98	177	192	192	202
ENSG00000084453.17_SLCO1A2	0	0	0	0	0	0	0	0	0	0	2	0	0	1	0	1
ENSG00000084463.8_WBP11	1971	1949	1693	1770	1350	1448	1541	1492	597	618	528	526	716	761	809	772
ENSG00000084623.12_EIF3I	2782	2703	2489	2519	2492	2449	2525	2627	1140	1111	1013	1001	1786	1783	1882	1878
ENSG00000084628.10_NKAIN1	17	18	11	16	5	11	15	7	1	2	0	0	1	2	0	1
ENSG00000084636.18_COL16A1	0	0	0	0	0	0	0	0	268	284	258	239	247	252	242	271
ENSG00000084652.16_TXLNA	1898	1995	1743	1706	1279	1281	1377	1392	1467	1436	1189	1218	1256	1254	1396	1413
ENSG00000084674.15_APOB	0	0	0	0	0	0	0	0	0	0	0	0	0	0	0	0
ENSG00000084676.16_NCOA1	423	439	363	366	239	245	260	302	250	280	232	233	285	283	308	295
ENSG00000084693.16_AGBL5	462	419	393	396	314	278	285	349	343	375	278	280	363	348	413	421
ENSG00000084710.14_EFR3B	12	9	14	10	9	10	8	6	46	35	35	33	21	28	27	28
ENSG00000084731.15_KIF3C	322	300	276	254	195	190	217	224	195	195	181	185	224	206	215	215
ENSG00000084733.11_RAB10	1478	1407	1338	1384	1307	1386	1363	1351	1613	1605	1465	1468	2209	2240	2251	2359
ENSG00000084734.9_GCKR	3	3	1	1	0	1	1	1	3	1	0	0	0	0	0	0
ENSG00000084754.12_HADHA	3004	3157	2793	2815	3096	2969	3127	3224	1776	1721	1459	1444	2014	2045	2210	2283
ENSG00000084764.12_MAPRE3	51	47	42	36	37	40	52	43	782	819	726	742	667	679	635	717
ENSG00000084774.14_CAD	3066	2965	2700	2684	2228	2115	2339	2306	2055	2045	1671	1738	1662	1698	1896	1860
ENSG00000085063.17_CD59	2108	2083	1821	1946	2824	2760	2949	2967	1957	1960	1725	1775	2667	2635	2751	2817
ENSG00000085117.12_CD82	98	71	81	80	101	103	109	97	214	219	202	186	198	192	192	212
ENSG00000085185.16_BCORL1	543	512	446	451	306	311	366	345	266	271	216	232	281	240	303	277
ENSG00000085224.23_ATRX	838	809	726	779	618	641	663	644	1237	1263	993	1032	974	1015	1128	1159
ENSG00000085231.14_AK6	293	306	273	277	239	228	231	253	176	178	168	153	205	197	204	210
ENSG00000085265.11_FCN1	1	0	1	0	1	1	0	0	0	1	2	0	0	0	0	0
ENSG00000085274.16_MYNN	151	154	143	142	154	142	149	153	113	121	101	107	163	166	183	163
ENSG00000085276.19_MECOM	229	220	192	190	172	142	169	188	41	37	25	37	51	34	53	45
ENSG00000085365.18_SCAMP1	525	546	513	520	819	791	821	805	462	447	348	369	496	532	580	601
ENSG00000085377.15_PREP	491	466	420	402	424	386	453	448	507	516	458	408	724	734	781	807
ENSG00000085382.12_HACE1	149	150	142	128	101	101	109	104	131	137	102	102	124	133	157	151
ENSG00000085415.16_SEH1L	1026	1018	967	948	877	882	911	868	510	452	436	447	555	559	567	572
ENSG00000085433.16_WDR47	211	196	171	165	154	143	178	170	102	80	87	77	115	95	89	130
ENSG00000085449.15_WDFY1	407	421	359	345	270	279	336	291	490	483	402	377	458	444	502	535
ENSG00000085465.13_OVGP1	15	13	14	13	16	19	20	14	45	60	47	51	60	52	54	58
ENSG00000085491.17_SLC25A24	382	418	365	395	312	330	299	337	645	665	547	585	938	960	1039	1004
ENSG00000085511.20_MAP3K4	360	408	344	366	248	258	248	266	297	296	218	222	225	239	290	287
ENSG00000085514.16_PILRA	2	0	1	0	0	0	1	2	8	5	3	6	4	1	4	7
ENSG00000085552.17_IGSF9	0	0	0	0	0	0	0	0	282	293	254	238	311	339	325	379
ENSG00000085563.15_ABCB1	0	1	0	0	0	0	1	0	452	463	314	338	438	429	548	538
ENSG00000085644.14_ZNF213	150	164	146	131	112	113	120	123	135	148	128	120	134	151	154	148
ENSG00000085662.14_AKR1B1	1	1	0	0	3	3	6	3	10	8	7	13	19	22	21	17
ENSG00000085719.13_CPNE3	1406	1469	1354	1294	1710	1629	1730	1739	558	548	444	487	904	892	1016	942
ENSG00000085721.13_RRN3	1004	1051	938	897	826	846	899	887	294	266	224	236	293	298	321	340
ENSG00000085733.16_CTTN	4923	4825	4337	4342	3132	3094	3356	3338	5653	5815	4980	5019	5003	5012	5351	5300
ENSG00000085741.13_WNT11	46	45	47	43	49	56	47	55	10	5	10	13	11	9	7	4
ENSG00000085760.15_MTIF2	787	790	696	750	675	704	733	697	753	776	570	615	796	786	923	928
ENSG00000085788.14_DDHD2	345	370	332	329	310	285	319	290	481	458	384	394	531	531	597	580
ENSG00000085831.16_TTC39A	9	8	10	6	12	11	15	9	294	261	212	234	231	227	275	254
ENSG00000085832.17_EPS15	454	494	388	388	310	307	372	365	330	304	249	239	317	359	417	375
ENSG00000085840.13_ORC1	396	437	380	389	303	303	307	313	149	164	115	120	123	112	153	138
ENSG00000085871.9_MGST2	247	221	249	210	371	385	385	375	203	191	172	178	241	186	210	237
ENSG00000085872.15_CHERP	1488	1477	1346	1314	1088	1085	1188	1122	997	1016	884	841	1019	996	1086	1094
ENSG00000085978.22_ATG16L1	245	246	221	228	201	190	201	204	326	320	280	279	298	323	335	334
ENSG00000085982.14_USP40	322	352	300	301	218	256	251	256	646	685	550	549	531	510	582	594
ENSG00000085998.14_POMGNT1	1235	1221	1157	1098	1237	1246	1291	1291	1370	1302	1152	1169	1338	1322	1413	1427
ENSG00000085999.13_RAD54L	370	427	386	362	366	375	376	375	289	308	220	224	221	213	284	262
ENSG00000086015.22_MAST2	1316	1367	1207	1175	834	861	917	913	1633	1630	1417	1365	1188	1214	1352	1268
ENSG00000086061.16_DNAJA1	4505	4648	4053	4042	3550	3567	3826	3862	1163	1156	1004	1073	1518	1455	1511	1601
ENSG00000086062.13_B4GALT1	982	955	875	871	1068	1092	1191	1094	3592	3629	2952	3082	4078	4109	4533	4488
ENSG00000086065.14_CHMP5	522	518	505	501	479	489	465	483	554	614	526	562	1026	957	979	1064
ENSG00000086102.19_NFX1	481	483	467	448	355	353	349	351	569	534	439	477	531	522	579	593
ENSG00000086159.13_AQP6	3	2	0	0	0	2	0	0	10	13	3	16	7	5	8	6
ENSG00000086189.11_DIMT1	499	538	510	487	483	498	488	481	198	186	190	187	306	312	329	286
ENSG00000086200.17_IPO11	419	407	401	420	401	436	385	414	189	207	166	155	260	260	300	281
ENSG00000086205.18_FOLH1	0	0	0	0	0	0	0	0	0	0	0	0	0	0	0	0
ENSG00000086232.13_EIF2AK1	1321	1371	1212	1191	919	892	981	957	1873	1824	1627	1667	2071	2149	2147	2274
ENSG00000086288.12_NME8	0	0	0	0	0	0	0	0	0	0	0	0	0	0	0	0
ENSG00000086289.12_EPDR1	0	1	2	0	0	0	2	1	1346	1367	1163	1109	1680	1655	1853	1813
ENSG00000086300.16_SNX10	282	314	265	279	269	307	300	304	81	76	83	69	176	162	174	170
ENSG00000086475.15_SEPHS1	1023	988	912	855	699	766	774	824	476	492	457	456	638	629	644	634
ENSG00000086504.18_MRPL28	1134	1128	1038	1089	928	964	967	936	770	773	769	701	977	966	945	990
ENSG00000086506.3_HBQ1	0	0	0	0	0	0	0	0	0	0	0	0	0	0	0	0
ENSG00000086544.3_ITPKC	244	213	204	233	184	191	199	169	334	315	298	280	321	317	326	341
ENSG00000086548.9_CEACAM6	0	0	0	0	0	0	0	0	9	10	9	12	9	12	7	10
ENSG00000086570.13_FAT2	5	0	2	3	0	0	0	2	4	15	5	9	13	11	13	18
ENSG00000086589.12_RBM22	759	785	682	704	591	597	641	620	617	573	500	553	604	711	699	685
ENSG00000086598.11_TMED2	3574	3593	3408	3316	5224	5229	5436	5333	2869	2826	2422	2427	4418	4496	4796	4862
ENSG00000086619.14_ERO1B	204	174	188	171	238	257	257	248	481	445	406	406	588	602	619	645
ENSG00000086666.19_ZFAND6	388	400	419	388	328	348	293	317	431	427	371	392	657	675	725	684
ENSG00000086696.11_HSD17B2	0	0	0	0	0	0	0	0	1	1	0	0	0	0	1	0
ENSG00000086712.13_TXLNG	1149	1193	1106	1071	886	856	871	897	242	223	204	221	225	275	250	260
ENSG00000086717.18_PPEF1	1	0	2	0	0	3	3	1	2	1	0	0	2	1	1	3
ENSG00000086730.17_LAT2	18	11	18	12	14	14	13	13	91	86	101	76	96	95	81	101
ENSG00000086758.16_HUWE1	3912	3927	3333	3418	2021	1947	2237	2290	4274	4268	3355	3474	3441	3425	4027	3958
ENSG00000086827.9_ZW10	174	195	179	203	204	189	188	174	180	189	163	149	232	242	274	242
ENSG00000086848.15_ALG9	301	276	256	271	379	406	428	396	331	329	264	275	422	390	437	472
ENSG00000086967.10_MYBPC2	0	1	1	1	1	0	2	1	4	7	5	6	4	10	5	8
ENSG00000086991.13_NOX4	0	0	0	0	0	0	0	0	0	0	0	0	0	0	0	0
ENSG00000087008.16_ACOX3	196	163	157	159	129	152	158	146	211	208	176	188	252	209	246	248
ENSG00000087053.20_MTMR2	583	539	547	496	500	472	506	488	283	274	227	259	344	373	371	394
ENSG00000087074.8_PPP1R15A	5628	5455	5013	5038	3977	4006	4175	4192	4474	4570	3921	3871	4145	4165	4486	4461
ENSG00000087076.9_HSD17B14	56	53	55	52	34	42	32	38	5	8	8	7	10	7	4	10
ENSG00000087077.14_TRIP6	2724	2685	2344	2369	1955	2008	2237	2124	440	465	451	411	538	535	538	524
ENSG00000087085.16_ACHE	90	97	96	101	110	129	99	122	13	13	7	14	24	22	22	30
ENSG00000087086.15_FTL	17563	17237	17210	17130	14911	14833	14518	14249	4691	4652	4488	4522	7210	7152	7096	7199
ENSG00000087087.20_SRRT	4211	4232	3831	3695	3051	3090	3273	3306	2604	2650	2323	2243	2215	2150	2364	2293
ENSG00000087088.20_BAX	2223	2055	1884	1974	1611	1642	1716	1719	399	418	414	404	498	509	491	464
ENSG00000087095.13_NLK	104	102	94	86	93	96	96	110	81	83	59	71	82	95	102	100
ENSG00000087111.21_PIGS	502	537	509	478	577	629	578	643	719	692	554	615	796	740	847	860
ENSG00000087116.16_ADAMTS2	0	0	0	1	0	1	0	0	0	0	0	0	0	0	2	0
ENSG00000087128.10_TMPRSS11E	0	0	0	0	0	0	0	0	3	0	2	2	1	0	2	2
ENSG00000087152.16_ATXN7L3	845	815	774	758	610	624	644	622	923	901	793	782	753	776	865	779
ENSG00000087157.19_PGS1	337	378	318	328	241	252	263	259	207	226	196	216	226	217	219	214
ENSG00000087191.13_PSMC5	2157	2197	1962	2052	1478	1607	1588	1574	1255	1139	1114	1090	1318	1375	1344	1396
ENSG00000087206.17_UIMC1	341	354	335	312	234	257	246	251	261	261	231	247	296	286	319	275
ENSG00000087237.12_CETP	0	0	0	0	0	0	0	0	0	0	0	0	0	0	0	0
ENSG00000087245.13_MMP2	0	0	0	0	0	0	0	0	0	0	2	1	4	1	1	0
ENSG00000087250.9_MT3	0	0	0	0	0	0	0	0	0	0	0	0	0	0	0	0
ENSG00000087253.13_LPCAT2	291	297	270	290	422	428	416	450	792	767	638	625	918	881	1004	1022
ENSG00000087258.16_GNAO1	0	1	1	2	0	0	4	1	0	0	2	0	0	1	2	0
ENSG00000087263.17_OGFOD1	734	730	670	682	580	586	601	596	342	358	274	253	440	418	523	485
ENSG00000087266.17_SH3BP2	749	671	652	635	518	499	547	518	1227	1188	1010	1068	894	868	909	991
ENSG00000087269.16_NOP14	2197	2053	1977	1987	1501	1416	1498	1439	700	682	591	593	620	627	687	663
ENSG00000087274.18_ADD1	1467	1492	1347	1279	965	984	1084	1020	1504	1637	1405	1347	1597	1574	1662	1699
ENSG00000087299.12_L2HGDH	343	416	353	354	263	277	260	286	187	186	167	163	206	214	205	237
ENSG00000087301.9_TXNDC16	65	63	61	57	72	82	82	74	181	201	158	156	177	179	216	184
ENSG00000087302.9_RTRAF	1041	1039	969	973	924	908	908	957	643	663	598	588	838	932	917	920
ENSG00000087303.18_NID2	0	0	1	0	0	0	0	1	1	0	0	1	0	0	0	0
ENSG00000087338.5_GMCL1	365	351	326	321	316	293	332	312	581	574	489	489	639	651	710	698
ENSG00000087365.16_SF3B2	4142	4061	3699	3720	2735	2621	2815	2815	1636	1669	1532	1477	1905	1831	1945	1898
ENSG00000087448.11_KLHL42	518	511	469	509	449	438	416	467	447	383	390	396	350	373	348	352
ENSG00000087460.29_GNAS	11199	11262	9764	9548	7856	7709	8659	8794	4597	4533	4089	3870	5501	5356	5752	5832
ENSG00000087470.19_DNM1L	1729	1821	1563	1580	1319	1354	1431	1456	614	657	539	519	723	771	845	806
ENSG00000087494.16_PTHLH	0	0	0	0	0	0	0	1	2	0	3	0	1	6	3	3
ENSG00000087495.17_PHACTR3	0	0	0	0	0	0	0	0	15	17	15	13	19	19	19	22
ENSG00000087502.18_ERGIC2	1188	1092	1023	1071	1589	1513	1649	1590	389	402	317	326	542	551	587	632
ENSG00000087510.7_TFAP2C	55	34	39	46	27	29	30	23	383	400	328	337	393	381	438	406
ENSG00000087586.18_AURKA	1122	1078	1009	997	895	816	874	907	401	427	368	388	580	569	581	608
ENSG00000087589.17_CASS4	0	0	0	0	0	0	0	0	26	24	19	14	15	21	22	29
ENSG00000087842.11_PIR	23	22	16	15	19	19	30	19	99	91	73	71	105	123	135	133
ENSG00000087884.14_AAMDC	39	44	34	47	30	21	17	27	27	33	27	33	32	44	37	34
ENSG00000087903.13_RFX2	108	100	89	84	61	59	73	70	52	48	48	46	70	76	84	65
ENSG00000087995.16_METTL2A	399	383	376	356	435	425	454	426	184	181	141	149	241	262	287	281
ENSG00000088002.12_SULT2B1	0	0	1	0	0	0	0	0	244	237	194	205	282	292	297	337
ENSG00000088035.18_ALG6	150	165	160	188	298	277	243	295	89	103	99	90	108	132	116	116
ENSG00000088038.19_CNOT3	1045	1007	920	851	692	635	776	710	736	737	654	615	746	746	818	789
ENSG00000088053.11_GP6	4	8	11	9	7	5	1	2	3	5	4	2	7	5	5	7
ENSG00000088179.9_PTPN4	107	113	101	97	75	79	74	89	163	181	140	140	186	204	206	232
ENSG00000088205.13_DDX18	1431	1525	1330	1312	1365	1233	1386	1385	689	675	558	580	857	853	950	932
ENSG00000088247.18_KHSRP	6475	6595	5701	5739	4111	4016	4516	4436	6782	6666	5856	5785	6187	6172	6486	6759
ENSG00000088256.9_GNA11	1255	1284	1194	1124	871	824	917	839	752	710	570	664	737	763	858	786
ENSG00000088280.19_ASAP3	245	244	223	190	171	154	174	200	353	335	286	292	243	254	255	298
ENSG00000088298.13_EDEM2	292	296	291	285	398	419	422	392	331	327	270	303	450	450	481	482
ENSG00000088305.18_DNMT3B	101	105	89	95	84	63	76	82	64	57	48	49	41	32	38	49
ENSG00000088320.4_REM1	0	0	0	0	0	0	0	0	0	0	0	0	0	0	0	0
ENSG00000088325.16_TPX2	3267	3361	2983	2940	2151	2149	2279	2320	1240	1309	1051	1119	1533	1527	1657	1666
ENSG00000088340.17_FER1L4	95	82	82	76	63	58	65	67	1129	1082	972	984	646	656	677	669
ENSG00000088356.6_PDRG1	440	454	464	435	385	374	355	348	175	169	156	171	239	216	222	234
ENSG00000088367.23_EPB41L1	732	654	613	626	447	433	474	467	884	943	807	814	963	991	1044	1007
ENSG00000088386.17_SLC15A1	0	0	0	0	0	0	0	0	0	0	0	0	0	0	0	0
ENSG00000088387.20_DOCK9	229	273	219	207	151	178	198	176	674	708	547	563	638	634	710	750
ENSG00000088448.14_ANKRD10	243	235	201	228	168	146	168	167	466	421	370	387	421	415	450	458
ENSG00000088451.11_TGDS	124	91	120	96	131	110	114	120	137	112	110	119	230	207	233	222
ENSG00000088538.13_DOCK3	5	4	3	5	5	3	7	1	22	14	11	15	25	24	26	32
ENSG00000088543.15_C3orf18	237	222	193	223	159	173	167	182	141	134	144	113	141	107	127	118
ENSG00000088682.14_COQ9	737	664	619	643	488	499	541	503	396	360	346	352	448	491	517	443
ENSG00000088726.16_TMEM40	0	0	0	0	1	0	4	4	3	0	0	0	16	9	13	14
ENSG00000088727.14_KIF9	79	75	75	75	69	54	60	56	34	40	37	41	51	53	42	50
ENSG00000088756.13_ARHGAP28	0	0	0	0	0	0	0	0	80	98	75	83	125	142	135	147
ENSG00000088766.12_CRLS1	722	695	674	725	792	702	753	696	266	265	213	228	310	327	359	346
ENSG00000088782.5_DEFB127	0	0	0	0	0	0	0	0	0	0	0	0	0	0	0	0
ENSG00000088808.18_PPP1R13B	218	217	196	204	146	169	162	161	215	203	172	194	200	202	215	211
ENSG00000088812.18_ATRN	1519	1527	1442	1393	1709	1696	1748	1755	1189	1218	1043	1015	1137	1170	1263	1239
ENSG00000088826.18_SMOX	299	288	285	261	224	247	232	247	332	313	268	267	326	300	348	349
ENSG00000088827.13_SIGLEC1	0	0	0	2	1	1	1	0	0	2	1	1	3	4	5	3
ENSG00000088832.18_FKBP1A	2748	2705	2536	2528	2163	2230	2252	2230	780	822	752	726	1357	1306	1352	1405
ENSG00000088833.18_NSFL1C	1875	1827	1665	1760	1386	1341	1424	1362	899	894	761	762	1096	1039	1140	1183
ENSG00000088836.14_SLC4A11	769	782	648	704	809	790	867	873	228	242	180	211	221	235	246	261
ENSG00000088854.13_C20orf194	0	0	0	0	0	0	0	0	1	1	0	0	0	0	1	0
ENSG00000088876.13_ZNF343	382	340	323	332	258	288	284	288	122	105	103	96	92	110	107	106
ENSG00000088881.21_EBF4	15	18	7	16	8	11	16	12	55	52	39	44	34	24	26	46
ENSG00000088882.8_CPXM1	0	0	1	0	0	0	0	1	0	0	0	0	0	0	0	0
ENSG00000088888.18_MAVS	1646	1643	1538	1519	1115	1208	1192	1161	1838	1968	1648	1682	1587	1663	1705	1738
ENSG00000088899.16_LZTS3	250	296	255	241	214	218	229	224	100	113	109	91	126	141	138	130
ENSG00000088926.14_F11	0	0	0	0	0	0	0	0	0	0	0	0	0	0	0	1
ENSG00000088930.8_XRN2	1905	2012	1824	1773	1640	1688	1662	1784	938	919	819	810	1112	1000	1132	1109
ENSG00000088970.16_KIZ	127	113	116	106	78	102	99	86	263	252	203	199	210	177	224	239
ENSG00000088986.11_DYNLL1	1058	1051	1006	1003	1053	1068	1036	1089	1120	1071	1066	947	1385	1346	1446	1354
ENSG00000088992.18_TESC	289	298	247	249	203	196	226	232	66	61	48	61	63	55	61	68
ENSG00000089006.17_SNX5	1606	1536	1447	1455	1378	1384	1390	1454	1168	1229	1033	1024	1404	1418	1516	1531
ENSG00000089009.16_RPL6	14479	14537	13118	13119	11385	11364	11963	11984	6483	6316	6009	6031	7448	7428	7495	7390
ENSG00000089012.14_SIRPG	0	0	0	0	0	0	0	0	0	0	0	0	0	0	0	0
ENSG00000089022.14_MAPKAPK5	377	347	291	344	329	334	335	383	434	479	395	425	385	411	388	431
ENSG00000089041.17_P2RX7	0	0	0	0	0	0	0	0	1	0	0	0	0	0	0	0
ENSG00000089048.15_ESF1	1049	1099	943	1007	914	969	993	981	370	348	298	351	413	437	439	442
ENSG00000089050.16_RBBP9	169	175	160	141	166	159	201	151	93	72	78	88	128	143	134	132
ENSG00000089053.13_ANAPC5	996	947	882	898	875	861	911	893	613	635	572	547	693	693	714	729
ENSG00000089057.15_SLC23A2	268	237	249	232	216	218	227	205	476	536	396	471	389	399	426	428
ENSG00000089060.12_SLC8B1	365	381	337	300	359	297	361	370	840	780	698	727	746	792	778	845
ENSG00000089063.15_TMEM230	807	800	723	793	816	793	809	819	539	556	514	526	881	840	863	883
ENSG00000089091.16_DZANK1	43	31	39	33	26	31	28	26	27	22	16	14	22	17	30	24
ENSG00000089094.19_KDM2B	864	878	732	743	581	619	677	693	418	387	347	322	360	358	389	411
ENSG00000089101.19_CFAP61	2	2	3	0	1	0	0	0	0	0	0	0	0	1	0	0
ENSG00000089116.4_LHX5	0	0	0	1	0	0	0	0	6	12	10	9	12	12	12	10
ENSG00000089123.16_TASP1	142	175	165	118	115	135	127	141	88	75	86	70	92	82	81	91
ENSG00000089127.15_OAS1	2	3	1	5	4	7	5	1	236	258	234	202	299	282	325	288
ENSG00000089154.11_GCN1	5003	4971	4359	4438	3900	3784	4193	4135	4014	4015	3335	3312	3569	3616	3999	4040
ENSG00000089157.16_RPLP0	18798	18952	18328	18205	20676	20967	20862	20969	11175	11044	10163	10190	14727	14622	15007	15114
ENSG00000089159.17_PXN	4854	4798	4292	4233	3257	3115	3481	3440	2839	2753	2367	2375	3575	3406	3904	3698
ENSG00000089163.4_SIRT4	6	12	9	11	12	12	13	10	5	6	3	8	15	13	12	18
ENSG00000089169.15_RPH3A	0	0	0	0	0	0	0	0	0	0	0	0	0	0	0	0
ENSG00000089177.19_KIF16B	404	378	349	363	244	240	252	252	233	214	165	158	154	160	210	198
ENSG00000089195.15_TRMT6	1101	1146	1002	1023	885	885	956	916	491	467	407	423	577	495	590	559
ENSG00000089199.10_CHGB	1	1	1	0	0	0	0	0	0	0	2	0	0	0	0	0
ENSG00000089220.5_PEBP1	1992	1839	1865	1820	1454	1443	1398	1411	1178	1279	1118	1078	1215	1250	1302	1265
ENSG00000089225.20_TBX5	0	0	0	0	0	0	0	0	1	0	0	0	0	0	0	0
ENSG00000089234.16_BRAP	318	335	292	277	200	213	216	241	210	219	203	154	229	252	265	268
ENSG00000089248.7_ERP29	1984	2047	1961	1901	2317	2392	2402	2330	3745	3769	3627	3348	4075	3969	4049	4127
ENSG00000089250.19_NOS1	0	0	0	0	0	0	0	0	0	0	0	0	0	0	1	1
ENSG00000089280.19_FUS	14194	13993	12929	13072	10140	10026	10341	10319	4170	4152	3875	3913	3550	3550	3486	3470
ENSG00000089289.16_IGBP1	394	366	345	357	326	316	335	325	412	389	329	351	453	456	503	487
ENSG00000089327.15_FXYD5	3822	3931	3428	3447	4424	4412	4737	4730	1474	1464	1330	1296	1908	1868	1931	2030
ENSG00000089335.21_ZNF302	145	131	122	126	112	106	116	114	0	0	0	0	6	6	1	8
ENSG00000089351.15_GRAMD1A	752	744	625	616	592	638	701	715	87	94	78	99	110	100	96	107
ENSG00000089356.19_FXYD3	1	0	0	0	0	0	0	0	194	185	179	175	225	233	228	235
ENSG00000089472.17_HEPH	1	0	0	0	0	0	0	0	469	482	402	419	916	922	982	995
ENSG00000089486.17_CDIP1	10	6	5	8	6	9	11	7	11	15	9	12	3	8	8	7
ENSG00000089505.18_CMTM1	54	42	39	32	11	21	27	24	10	11	11	6	10	8	13	7
ENSG00000089558.9_KCNH4	0	0	0	1	0	1	0	2	0	0	0	0	0	0	0	0
ENSG00000089597.18_GANAB	8232	8231	7854	7815	10415	10342	10596	10459	11856	11733	10422	10232	11481	11360	12072	12151
ENSG00000089639.11_GMIP	558	501	492	456	392	393	423	415	673	606	565	557	588	588	629	614
ENSG00000089682.16_RBM41	113	108	107	114	79	77	72	68	133	164	136	134	143	159	156	155
ENSG00000089685.15_BIRC5	791	784	680	741	766	780	798	835	328	316	278	307	496	472	512	496
ENSG00000089692.9_LAG3	2	1	0	0	1	3	1	1	6	3	4	6	6	3	7	4
ENSG00000089693.11_MLF2	4424	4392	4131	4166	3544	3647	3592	3629	1726	1731	1665	1669	2217	2256	2205	2215
ENSG00000089723.10_OTUB2	9	8	9	7	8	9	10	8	62	66	58	60	75	69	74	73
ENSG00000089737.17_DDX24	2038	2014	1827	1848	1526	1542	1646	1573	1156	1112	931	942	1166	1169	1298	1307
ENSG00000089775.12_ZBTB25	145	155	128	143	149	124	131	156	274	277	241	220	253	245	281	270
ENSG00000089818.18_NECAP1	435	426	395	385	404	407	427	426	222	210	190	198	276	274	270	305
ENSG00000089820.16_ARHGAP4	8	6	9	6	5	4	4	4	24	20	18	24	22	28	24	24
ENSG00000089847.12_ANKRD24	10	8	6	8	6	14	13	10	56	80	55	71	82	95	81	99
ENSG00000089876.12_DHX32	328	360	312	331	272	306	285	302	264	291	249	257	353	389	384	382
ENSG00000089902.10_RCOR1	636	674	584	623	497	496	507	515	564	531	391	433	523	525	624	639
ENSG00000089916.18_GPATCH2L	839	910	710	754	514	529	612	611	476	479	364	387	420	435	497	505
ENSG00000090006.18_LTBP4	505	524	447	419	429	457	492	512	979	949	878	791	618	632	630	708
ENSG00000090013.11_BLVRB	377	300	310	341	312	353	335	324	619	608	577	557	848	928	922	903
ENSG00000090020.11_SLC9A1	884	960	813	772	940	865	978	1013	1283	1309	1097	1094	1063	1190	1209	1264
ENSG00000090054.15_SPTLC1	1324	1289	1201	1180	1982	2055	2122	2121	1359	1323	1150	1093	1587	1705	1832	1787
ENSG00000090060.19_PAPOLA	2562	2502	2362	2341	1744	1824	1806	1813	1506	1475	1335	1333	1706	1731	1798	1792
ENSG00000090061.17_CCNK	1133	1152	953	926	776	811	922	950	607	688	545	557	843	857	933	911
ENSG00000090097.22_PCBP4	337	348	312	313	279	249	276	274	272	288	283	264	281	228	230	246
ENSG00000090104.12_RGS1	0	0	0	0	0	0	0	0	0	0	1	0	0	0	0	0
ENSG00000090238.12_YPEL3	37	36	32	28	18	21	29	18	443	405	375	388	315	341	343	327
ENSG00000090263.16_MRPS33	103	106	110	115	111	126	108	105	213	199	209	192	294	320	306	304
ENSG00000090266.13_NDUFB2	1065	1114	1013	1099	957	984	947	944	290	361	311	316	422	431	427	417
ENSG00000090273.14_NUDC	13514	13663	12296	12280	10665	10494	11156	11114	1062	1020	935	941	1319	1182	1304	1298
ENSG00000090316.16_MAEA	529	523	502	498	422	443	420	438	897	939	813	743	959	899	992	1039
ENSG00000090339.9_ICAM1	846	807	719	755	760	757	817	805	568	528	456	462	602	610	687	647
ENSG00000090372.15_STRN4	1159	1195	1067	1044	796	867	896	872	1119	1130	1038	1026	1097	1079	1094	1107
ENSG00000090376.11_IRAK3	0	0	0	0	1	0	0	0	0	0	0	0	0	1	1	1
ENSG00000090382.7_LYZ	0	0	0	1	0	0	0	0	0	0	0	1	1	1	0	0
ENSG00000090402.8_SI	1	0	0	0	2	2	0	3	0	0	0	0	1	0	0	0
ENSG00000090432.7_MUL1	658	689	624	635	787	773	809	793	463	429	412	428	543	576	562	563
ENSG00000090447.12_TFAP4	494	457	440	405	268	309	305	318	375	374	317	336	335	325	353	350
ENSG00000090470.15_PDCD7	648	654	579	613	468	478	482	498	537	496	419	419	525	536	586	614
ENSG00000090487.11_SPG21	595	587	583	595	592	607	578	567	429	429	377	393	603	633	611	686
ENSG00000090512.12_FETUB	0	0	0	0	0	0	0	0	0	0	0	0	0	0	0	0
ENSG00000090520.12_DNAJB11	964	964	870	858	1149	1223	1279	1241	1220	1197	1077	1056	1227	1239	1300	1297
ENSG00000090530.10_P3H2	0	0	0	0	0	0	2	2	42	34	35	45	86	87	87	82
ENSG00000090534.20_THPO	0	0	2	2	0	0	1	0	1	2	3	3	2	0	0	0
ENSG00000090539.15_CHRD	22	26	22	15	18	18	26	21	26	24	20	24	40	24	34	34
ENSG00000090554.13_FLT3LG	47	47	54	34	44	37	34	47	17	14	14	17	26	13	15	17
ENSG00000090565.17_RAB11FIP3	719	736	660	602	480	463	533	516	624	620	543	505	597	567	627	652
ENSG00000090581.11_GNPTG	330	378	335	304	327	298	317	344	609	533	548	530	589	626	570	633
ENSG00000090612.22_ZNF268	238	248	204	237	183	171	189	181	137	120	126	112	97	101	87	104
ENSG00000090615.15_GOLGA3	1485	1482	1325	1384	905	880	934	913	1768	1784	1496	1387	1277	1248	1448	1469
ENSG00000090621.15_PABPC4	3640	3582	3303	3287	3016	3066	3106	3236	2467	2458	2033	2101	2390	2410	2637	2652
ENSG00000090659.18_CD209	0	0	0	0	0	0	0	0	0	0	0	0	0	0	0	0
ENSG00000090661.12_CERS4	0	0	0	0	0	0	0	0	0	1	0	1	1	0	0	0
ENSG00000090674.16_MCOLN1	383	359	347	337	414	441	452	436	161	165	147	153	165	175	164	182
ENSG00000090686.16_USP48	885	911	875	767	622	586	630	621	820	830	741	692	885	838	938	904
ENSG00000090776.6_EFNB1	407	391	347	342	435	447	483	482	174	202	161	142	199	156	189	217
ENSG00000090857.14_PDPR	1990	1966	1779	1848	1788	1823	1851	1901	484	490	405	409	382	404	408	467
ENSG00000090861.17_AARS1	4649	4720	4132	4137	3057	2973	3283	3277	3705	3598	3138	3169	3622	3522	3866	3810
ENSG00000090863.12_GLG1	6415	6528	5827	5726	6568	6588	7043	6988	6950	6921	5923	5820	5557	5566	6098	6111
ENSG00000090889.12_KIF4A	556	584	539	556	396	458	428	404	397	332	274	298	346	345	396	410
ENSG00000090905.19_TNRC6A	492	453	390	409	316	270	335	340	745	746	569	600	513	583	668	641
ENSG00000090924.15_PLEKHG2	875	877	799	788	644	658	691	676	479	530	393	472	359	404	420	406
ENSG00000090932.11_DLL3	0	0	0	0	1	0	0	0	0	4	2	2	0	0	0	1
ENSG00000090971.5_NAT14	29	33	28	30	24	36	27	32	637	603	582	616	627	591	600	565
ENSG00000090975.14_PITPNM2	397	359	336	336	267	268	293	284	315	308	270	249	272	269	332	272
ENSG00000090989.18_EXOC1	238	235	227	215	221	201	225	204	287	273	236	246	292	312	320	333
ENSG00000091009.8_RBM27	415	446	407	383	288	342	338	315	420	385	354	376	467	496	555	440
ENSG00000091010.6_POU4F3	0	0	0	0	0	0	0	0	0	1	0	0	4	0	4	3
ENSG00000091039.17_OSBPL8	1407	1401	1241	1215	915	905	982	1021	441	467	348	322	512	451	581	581
ENSG00000091073.20_DTX2	151	150	134	133	101	119	118	119	597	564	510	474	656	681	735	723
ENSG00000091106.19_NLRC4	8	3	5	1	5	7	5	10	27	19	15	21	14	12	18	14
ENSG00000091127.14_PUS7	447	426	413	385	342	303	342	328	262	252	223	213	226	247	280	238
ENSG00000091128.13_LAMB4	0	0	0	0	0	0	0	0	0	1	0	0	0	0	0	0
ENSG00000091129.21_NRCAM	0	0	0	0	0	0	0	0	2	2	0	3	3	2	0	4
ENSG00000091136.15_LAMB1	1799	1774	1562	1503	1821	1800	2006	1990	5165	5109	4219	4246	4773	4732	5240	5425
ENSG00000091137.14_SLC26A4	1	6	3	1	6	1	3	6	16	19	10	15	20	17	18	26
ENSG00000091138.13_SLC26A3	0	1	0	0	0	0	0	0	0	0	0	0	2	1	0	0
ENSG00000091140.14_DLD	2031	1989	1888	1761	1817	1786	1873	1907	872	883	708	745	966	967	1065	1083
ENSG00000091157.14_WDR7	303	304	238	269	196	200	223	240	210	193	160	156	161	199	216	206
ENSG00000091164.13_TXNL1	673	610	661	605	679	729	663	706	425	406	387	383	651	624	651	662
ENSG00000091181.20_IL5RA	0	0	0	0	0	0	0	0	0	0	0	0	0	0	0	0
ENSG00000091262.17_ABCC6	11	11	13	12	11	14	10	14	50	51	44	40	37	28	35	38
ENSG00000091317.8_CMTM6	983	1051	947	994	1500	1514	1490	1582	1516	1610	1340	1335	1913	1898	2087	2036
ENSG00000091409.16_ITGA6	455	484	345	417	459	457	571	488	7766	7841	6253	6346	7805	7790	8948	8787
ENSG00000091428.18_RAPGEF4	3	0	1	2	0	0	0	0	1	1	1	1	1	0	0	1
ENSG00000091436.17_MAP3K20	1138	1133	988	1017	745	745	834	785	975	983	789	801	1053	1063	1196	1190
ENSG00000091482.8_SMPX	0	0	0	0	0	0	0	0	0	0	0	0	0	0	0	0
ENSG00000091483.8_FH	1074	1033	956	908	1023	998	1081	1093	528	483	429	445	647	750	742	758
ENSG00000091490.11_SEL1L3	1001	1069	863	903	935	915	1017	1046	3875	3862	3211	3262	3800	3824	4219	4202
ENSG00000091513.16_TF	6	11	10	5	5	5	4	5	3	9	4	6	10	6	7	7
ENSG00000091527.16_CDV3	2420	2494	2293	2230	1696	1729	1691	1825	1787	1857	1622	1607	1937	1991	2085	2045
ENSG00000091536.19_MYO15A	0	0	2	5	0	0	1	1	14	6	10	8	11	7	8	12
ENSG00000091542.9_ALKBH5	762	807	700	698	568	556	603	603	652	669	580	541	753	735	828	792
ENSG00000091583.11_APOH	0	0	0	0	0	0	0	0	0	0	0	1	0	0	0	0
ENSG00000091592.16_NLRP1	8	3	5	2	5	1	4	7	25	27	14	31	45	38	55	34
ENSG00000091622.16_PITPNM3	28	33	30	36	31	36	32	27	260	258	196	229	218	232	253	256
ENSG00000091640.8_SPAG7	447	455	378	417	355	335	366	383	384	333	315	340	401	392	399	413
ENSG00000091651.9_ORC6	443	445	391	435	364	363	363	376	184	185	147	160	211	194	234	215
ENSG00000091656.19_ZFHX4	3	0	1	1	0	1	3	2	0	1	1	1	0	1	1	0
ENSG00000091664.9_SLC17A6	0	0	0	0	0	0	0	0	0	0	0	0	0	0	0	0
ENSG00000091704.10_CPA1	0	0	0	0	0	0	0	0	0	1	0	0	0	0	1	0
ENSG00000091732.17_ZC3HC1	314	321	332	302	316	290	300	276	103	95	87	109	161	155	176	136
ENSG00000091831.24_ESR1	0	0	0	0	0	0	0	0	0	0	0	0	0	0	0	0
ENSG00000091844.8_RGS17	0	1	1	2	0	0	1	1	3	2	4	3	3	1	1	3
ENSG00000091879.14_ANGPT2	1	2	1	3	4	1	1	1	3	0	2	1	3	3	3	2
ENSG00000091947.10_TMEM101	351	359	349	332	547	499	549	512	405	399	350	382	458	458	462	482
ENSG00000091972.18_CD200	0	0	0	0	0	0	0	0	1	0	0	0	0	0	0	0
ENSG00000091986.16_CCDC80	5	3	2	1	6	5	8	8	109	97	85	89	175	143	166	181
ENSG00000092009.10_CMA1	0	0	0	0	0	0	0	0	0	0	0	0	0	0	0	0
ENSG00000092010.15_PSME1	1031	1055	985	961	1026	1090	1106	1061	698	693	663	643	1166	1142	1176	1190
ENSG00000092020.11_PPP2R3C	262	231	220	247	226	217	216	227	51	51	49	59	67	79	76	58
ENSG00000092036.19_HAUS4	206	250	207	234	221	249	231	233	329	337	312	303	444	438	419	483
ENSG00000092051.17_JPH4	1	0	0	1	2	3	3	1	1	1	1	1	3	0	1	1
ENSG00000092054.13_MYH7	0	0	0	0	0	0	0	0	0	0	0	0	0	0	0	0
ENSG00000092067.6_CEBPE	0	0	0	0	0	0	0	0	0	1	0	1	0	1	1	1
ENSG00000092068.20_SLC7A8	1	0	2	1	0	0	0	0	3048	3191	2643	2640	2473	2530	2804	2686
ENSG00000092094.11_OSGEP	207	210	180	220	207	179	188	195	111	123	130	108	151	137	128	141
ENSG00000092096.18_SLC22A17	0	0	0	0	0	0	0	0	0	0	0	0	0	0	0	0
ENSG00000092098.17_RNF31	260	355	281	321	292	245	247	269	369	393	319	296	311	276	298	381
ENSG00000092108.22_SCFD1	219	228	209	192	187	197	202	206	216	234	178	188	226	238	254	272
ENSG00000092140.16_G2E3	151	163	162	162	192	188	192	166	179	211	169	173	275	251	285	276
ENSG00000092148.13_HECTD1	1520	1461	1390	1306	1038	1103	1096	1154	1764	1776	1388	1400	1594	1568	1889	1808
ENSG00000092199.18_HNRNPC	6007	6012	5754	5661	5686	5726	5744	5688	4399	4324	4073	4108	6768	6846	6964	6949
ENSG00000092200.13_RPGRIP1	0	0	0	0	1	0	0	0	0	0	0	0	0	1	0	0
ENSG00000092201.10_SUPT16H	3882	4100	3591	3623	2751	2713	2934	2817	2605	2545	2187	2198	2232	2199	2396	2432
ENSG00000092203.15_TOX4	738	784	642	685	562	552	605	621	784	755	673	690	912	908	966	951
ENSG00000092208.19_GEMIN2	63	49	48	58	64	55	65	55	57	68	59	37	101	91	92	127
ENSG00000092295.12_TGM1	25	31	19	28	21	23	23	28	44	33	36	45	37	47	46	27
ENSG00000092330.18_TINF2	293	309	305	278	271	286	299	248	345	344	322	313	417	387	390	429
ENSG00000092345.14_DAZL	0	0	0	0	0	0	0	0	0	0	0	0	0	0	0	0
ENSG00000092377.15_TBL1Y	0	0	0	0	0	0	0	0	0	0	0	0	0	0	0	0
ENSG00000092421.17_SEMA6A	11	12	14	9	9	17	9	17	76	75	54	67	36	66	55	65
ENSG00000092439.16_TRPM7	916	878	826	804	722	802	794	801	677	695	512	566	645	616	756	720
ENSG00000092445.12_TYRO3	794	747	721	632	754	776	827	831	555	522	480	458	626	607	640	674
ENSG00000092470.12_WDR76	605	565	522	547	410	423	419	445	238	229	208	207	221	238	245	234
ENSG00000092529.25_CAPN3	21	20	15	18	16	17	19	22	67	54	60	53	33	35	30	32
ENSG00000092531.10_SNAP23	528	545	445	477	488	500	534	561	307	310	288	277	493	477	505	500
ENSG00000092607.15_TBX15	2	0	0	0	1	1	0	3	1	0	1	0	0	0	0	1
ENSG00000092621.13_PHGDH	1341	1333	1190	1195	904	886	957	962	4679	4692	4215	4393	6071	5958	6110	6242
ENSG00000092758.18_COL9A3	291	329	253	274	196	191	223	221	66	50	56	47	44	38	40	45
ENSG00000092820.18_EZR	3011	3005	2765	2621	2279	2162	2370	2360	8742	8685	7529	7389	10011	9991	10806	10833
ENSG00000092841.19_MYL6	6304	6345	5897	5958	5654	5706	5771	5747	2411	2288	2184	2166	2819	2825	2871	2871
ENSG00000092847.13_AGO1	1227	1199	1073	1078	816	815	890	873	548	565	467	464	544	490	588	557
ENSG00000092850.12_TEKT2	0	0	0	0	0	0	1	1	1	0	0	0	0	0	1	1
ENSG00000092853.14_CLSPN	1313	1306	1147	1146	888	874	942	995	480	470	395	384	415	433	458	499
ENSG00000092871.17_RFFL	382	444	375	347	286	308	322	328	329	335	272	300	341	335	374	355
ENSG00000092929.12_UNC13D	14	15	9	8	10	7	15	13	2480	2483	2125	2155	2509	2504	2678	2714
ENSG00000092931.11_MFSD11	242	239	209	222	254	273	269	291	437	467	401	414	426	451	443	461
ENSG00000092964.18_DPYSL2	416	430	381	408	304	323	317	315	1621	1634	1341	1366	2001	2012	2295	2134
ENSG00000092969.12_TGFB2	0	0	0	0	0	0	1	1	2170	2117	1812	1844	833	859	934	932
ENSG00000092978.11_GPATCH2	199	232	186	215	160	187	177	175	129	154	141	120	144	117	123	139
ENSG00000093000.19_NUP50	1332	1294	1200	1166	882	894	915	963	1266	1268	1025	1010	1296	1368	1471	1561
ENSG00000093009.11_CDC45	522	517	504	462	504	463	471	520	203	222	212	189	246	215	223	236
ENSG00000093010.15_COMT	1017	1056	982	937	1145	1195	1201	1219	1312	1342	1214	1180	1569	1633	1659	1668
ENSG00000093072.18_ADA2	0	0	0	0	0	0	0	0	0	4	2	4	0	1	1	2
ENSG00000093100.13_XXbac-B461K10.4	225	230	225	232	183	170	157	166	171	177	147	170	184	206	200	203
ENSG00000093134.15_VNN3	0	0	0	0	0	0	0	0	0	0	0	0	0	0	0	0
ENSG00000093144.19_ECHDC1	933	926	933	914	778	728	692	714	536	560	500	465	702	723	750	761
[truncated: 58,709 more rows]

## Sheet: RNAseq_stats_EHMT2_KO_SW1116
baseMean	log2FoldChange	lfcSE	stat	pvalue	padj	ID	dir	Significance
3306.76	1.19348	0.0316221	37.742	0	0	ENSG00000112697.17_TMEM30A	up	YES
3505.78	7.14605	0.10292	69.4329	0	0	ENSG00000147065.17_MSN	up	YES
26245.3	0.709721	0.0199121	35.6427	3.06239e-278	1.19443e-274	ENSG00000179218.15_CALR	up	YES
17256.1	0.857601	0.0242992	35.2934	7.40925e-273	2.16739e-269	ENSG00000135404.12_CD63	up	YES
11296.7	0.927674	0.0269266	34.452	4.20141e-260	9.83215e-257	ENSG00000114850.7_SSR3	up	YES
14131.4	0.712538	0.0210899	33.7858	3.19135e-250	6.22367e-247	ENSG00000172270.22_BSG	up	YES
1765.31	1.33882	0.039955	33.5083	3.64759e-246	6.0972e-243	ENSG00000198843.13_SELENOT	up	YES
5003.59	1.05705	0.0321669	32.8613	7.85497e-237	1.14889e-233	ENSG00000166710.21_B2M	up	YES
9044.92	0.761144	0.0231685	32.8525	1.04781e-236	1.36227e-233	ENSG00000166794.6_PPIB	up	YES
8673.73	0.748137	0.0232538	32.1727	4.25414e-227	4.97777e-224	ENSG00000143870.13_PDIA6	up	YES
12691.9	0.749903	0.0233116	32.1686	4.84835e-227	5.15733e-224	ENSG00000167004.13_PDIA3	up	YES
13551.4	0.720283	0.0224034	32.1506	8.66237e-227	8.44654e-224	ENSG00000148248.14_SURF4	up	YES
12464.4	0.707628	0.0223209	31.7025	1.43438e-220	1.29106e-217	ENSG00000204525.17_HLA-C	up	YES
2431.61	1.05829	0.0344496	30.7199	3.08267e-207	2.57645e-204	ENSG00000068697.7_LAPTM4A	up	YES
5725.59	0.806706	0.0264548	30.4937	3.15494e-204	2.46106e-201	ENSG00000244038.11_DDOST	up	YES
5832.13	0.829925	0.0272271	30.4816	4.56533e-204	3.33868e-201	ENSG00000156471.13_PTDSS1	up	YES
14897.2	0.643384	0.0211324	30.4454	1.37703e-203	9.47802e-201	ENSG00000159167.12_STC1	up	YES
5769.15	0.785234	0.0258977	30.3206	6.13013e-202	3.98492e-199	ENSG00000051523.11_CYBA	up	YES
2851.95	0.974519	0.0325472	29.9417	5.64009e-197	3.4734e-194	ENSG00000111775.3_COX6A1	up	YES
4048.29	0.909958	0.0307737	29.5693	3.70535e-192	2.16782e-189	ENSG00000067167.8_TRAM1	up	YES
5889.16	0.768569	0.0260521	29.5013	2.77209e-191	1.54458e-188	ENSG00000120217.14_CD274	up	YES
1887.64	1.19297	0.0407791	29.2544	3.9467e-188	2.09911e-185	ENSG00000117410.14_ATP6V0B	up	YES
2437.23	1.07463	0.037004	29.0409	2.00686e-185	1.02097e-182	ENSG00000019991.18_HGF	up	YES
4456.97	0.820143	0.0283118	28.9682	1.65342e-184	8.06113e-182	ENSG00000086598.11_TMED2	up	YES
5021.97	0.763717	0.026613	28.6971	4.14176e-181	1.93851e-178	ENSG00000128595.17_CALU	up	YES
1655.14	1.21887	0.0425727	28.6304	2.81366e-180	1.26625e-177	ENSG00000183291.17_SELENOF	up	YES
4135.42	1.01518	0.0356041	28.5132	8.04814e-179	3.48782e-176	ENSG00000147684.10_NDUFB9	up	YES
2132.8	1.20915	0.0428695	28.2052	5.04403e-175	2.10786e-172	ENSG00000123131.13_PRDX4	up	YES
1826.97	1.05612	0.0376507	28.0505	3.9342e-173	1.58738e-170	ENSG00000137563.13_GGH	up	YES
8428.59	0.690993	0.024716	27.9573	5.37391e-172	2.096e-169	ENSG00000134294.14_SLC38A2	up	YES
2324.67	0.981997	0.0351907	27.905	2.31715e-171	8.74613e-169	ENSG00000170348.9_TMED10	up	YES
29653.9	0.552907	0.0198195	27.8971	2.89011e-171	1.05679e-168	ENSG00000106366.9_SERPINE1	up	YES
8431.03	0.667487	0.0239924	27.8207	2.43674e-170	8.64009e-168	ENSG00000155660.11_PDIA4	up	YES
7186.94	0.669949	0.0245863	27.2489	1.71383e-163	5.89808e-161	ENSG00000239264.9_TXNDC5	up	YES
7104.38	0.693076	0.0254406	27.2429	2.01597e-163	6.73967e-161	ENSG00000197746.14_PSAP	up	YES
3291.6	0.824333	0.0302914	27.2134	4.50372e-163	1.46384e-160	ENSG00000101856.10_PGRMC1	up	YES
34627.9	0.619197	0.0228624	27.0837	1.53308e-161	4.84825e-159	ENSG00000044574.9_HSPA5	up	YES
9412.42	0.658247	0.0247501	26.5958	7.59906e-156	2.33991e-153	ENSG00000142871.18_CCN1	up	YES
3013.88	0.850362	0.0321201	26.4745	1.90789e-154	5.72415e-152	ENSG00000010278.15_CD9	up	YES
6809.84	0.687629	0.0261078	26.3381	7.03133e-153	2.05684e-150	ENSG00000058262.10_SEC61A1	up	YES
2619.22	0.905458	0.0344321	26.2969	2.07849e-152	5.9318e-150	ENSG00000129128.13_SPCS3	up	YES
3476.68	0.788675	0.0305828	25.7882	1.20425e-146	3.35499e-144	ENSG00000170540.15_ARL6IP1	up	YES
2456.1	1.00197	0.0390556	25.6548	3.73628e-145	1.0167e-142	ENSG00000163479.14_SSR2	up	YES
233.803	3.33168	0.129941	25.6399	5.48488e-145	1.45861e-142	ENSG00000117152.14_RGS4	up	YES
2555.11	0.859689	0.0337045	25.5066	1.66434e-143	4.32765e-141	ENSG00000131238.18_PPT1	up	YES
4857.83	0.74987	0.0298567	25.1157	3.3548e-139	8.5336e-137	ENSG00000074842.8_MYDGF	up	YES
1258.23	1.13238	0.0452511	25.0245	3.31196e-138	8.24536e-136	ENSG00000174938.15_SEZ6L2	up	YES
5021.04	0.678158	0.027126	25.0003	6.0693e-138	1.47952e-135	ENSG00000185825.17_BCAP31	up	YES
4845.63	0.759571	0.0303849	24.9983	6.37592e-138	1.52254e-135	ENSG00000163902.12_RPN1	up	YES
12859.2	0.556808	0.022289	24.9813	9.76474e-138	2.28515e-135	ENSG00000109971.14_HSPA8	up	YES
112628	0.581698	0.0233959	24.8632	1.86134e-136	4.2705e-134	ENSG00000198938.2_MT-CO3	up	YES
1444.23	1.02374	0.0412027	24.8464	2.82616e-136	6.3594e-134	ENSG00000084073.10_ZMPSTE24	up	YES
1740.99	0.980535	0.0395012	24.8229	5.07371e-136	1.12014e-133	ENSG00000052802.13_MSMO1	up	YES
2985.66	0.785722	0.0316601	24.8174	5.81534e-136	1.2601e-133	ENSG00000167775.11_CD320	up	YES
2367.27	0.853351	0.0345849	24.6741	2.02984e-134	4.31838e-132	ENSG00000149084.13_HSD17B12	up	YES
4679.4	0.664552	0.0270867	24.5343	6.36701e-133	1.33036e-130	ENSG00000072274.13_TFRC	up	YES
2201.61	0.91531	0.0373549	24.5031	1.36916e-132	2.81061e-130	ENSG00000139921.13_TMX1	up	YES
1688.95	0.938574	0.038686	24.2614	5.01803e-130	1.01234e-127	ENSG00000090054.15_SPTLC1	up	YES
6825.58	0.598093	0.0246915	24.2226	1.28491e-129	2.54825e-127	ENSG00000139641.13_ESYT1	up	YES
2312.94	0.835103	0.0345552	24.1672	4.92129e-129	9.59733e-127	ENSG00000064115.11_TM7SF3	up	YES
2840.72	0.813651	0.0341388	23.8336	1.49832e-125	2.87407e-123	ENSG00000163814.8_CDCP1	up	YES
2627.21	1.01527	0.0427714	23.7372	1.48838e-124	2.80895e-122	ENSG00000109861.17_CTSC	up	YES
4061.51	0.697359	0.0294557	23.6748	6.54929e-124	1.2164e-121	ENSG00000074696.13_HACD3	up	YES
4253.68	0.776186	0.0328276	23.6443	1.35151e-123	2.47094e-121	ENSG00000134910.14_STT3A	up	YES
6759.68	0.640317	0.0271159	23.6141	2.75947e-123	4.96747e-121	ENSG00000118705.17_RPN2	up	YES
1596.69	0.95835	0.0405967	23.6066	3.29815e-123	5.84723e-121	ENSG00000129562.11_DAD1	up	YES
24889.2	0.62471	0.0266027	23.483	6.09238e-122	1.06398e-119	ENSG00000139644.13_TMBIM6	up	YES
11138.8	0.598569	0.0255981	23.3833	6.31806e-121	1.08717e-118	ENSG00000185624.16_P4HB	up	YES
213.759	2.85391	0.122166	23.3609	1.06909e-120	1.81296e-118	ENSG00000138356.14_AOX1	up	YES
1412.17	1.01853	0.0436248	23.3474	1.46314e-120	2.44575e-118	ENSG00000143183.18_TMCO1	up	YES
9452.44	0.528812	0.0226749	23.3214	2.68644e-120	4.42733e-118	ENSG00000130175.10_PRKCSH	up	YES
7607.25	0.7198	0.0308735	23.3145	3.16309e-120	5.14046e-118	ENSG00000083845.9_RPS5	up	YES
3314.58	0.736494	0.0317343	23.2082	3.7654e-119	6.03548e-117	ENSG00000110651.12_CD81	up	YES
2564.26	0.822445	0.0355194	23.1548	1.30001e-118	2.05559e-116	ENSG00000135535.17_CD164	up	YES
8950.77	0.705721	0.0305092	23.1314	2.23583e-118	3.4882e-116	ENSG00000145425.10_RPS3A	up	YES
3381.81	0.71953	0.0311463	23.1016	4.462e-118	6.86973e-116	ENSG00000155380.13_SLC16A1	up	YES
7756.19	0.678653	0.0294653	23.0323	2.2128e-117	3.36259e-115	ENSG00000102265.12_TIMP1	up	YES
3528.11	0.722563	0.031428	22.991	5.73244e-117	8.5994e-115	ENSG00000124783.14_SSR1	up	YES
9335.97	0.588336	0.0256353	22.9503	1.46423e-116	2.16873e-114	ENSG00000089597.18_GANAB	up	YES
3556.73	0.683354	0.0298747	22.874	8.4416e-116	1.23469e-113	ENSG00000101474.12_APMAP	up	YES
2168.16	0.878134	0.0385192	22.7973	4.87342e-115	7.03999e-113	ENSG00000136986.10_DERL1	up	YES
1884.97	0.966645	0.042454	22.7692	9.253e-115	1.32036e-112	ENSG00000008282.9_SYPL1	up	YES
2509.64	0.799267	0.035112	22.7633	1.05893e-114	1.49284e-112	ENSG00000062716.13_VMP1	up	YES
1706.89	0.878751	0.0389792	22.5441	1.53522e-112	2.13853e-110	ENSG00000143753.13_DEGS1	up	YES
4640.4	0.613839	0.0273049	22.4809	6.38635e-112	8.79138e-110	ENSG00000059573.9_ALDH18A1	up	YES
1498.91	0.975664	0.0434329	22.4637	9.39903e-112	1.27881e-109	ENSG00000134970.14_TMED7	up	YES
4767.53	0.612281	0.0273648	22.3748	6.92721e-111	9.31671e-109	ENSG00000001036.14_FUCA2	up	YES
2207.68	0.857681	0.0383528	22.363	9.02977e-111	1.20065e-108	ENSG00000105976.16_MET	up	YES
2789.05	0.719547	0.0321971	22.3482	1.25765e-110	1.65346e-108	ENSG00000101000.6_PROCR	up	YES
1322.97	1.05883	0.0475944	22.2469	1.20846e-109	1.57114e-107	ENSG00000143771.12_CNIH4	up	YES
8502.58	0.516143	0.0232369	22.2122	2.61559e-109	3.36319e-107	ENSG00000177697.19_CD151	up	YES
6690.06	0.570884	0.0257333	22.1846	4.8327e-109	6.14646e-107	ENSG00000171858.18_RPS21	up	YES
2280.09	0.818761	0.0373047	21.9479	9.06185e-107	1.14014e-104	ENSG00000113732.9_ATP6V0E1	up	YES
2757.66	0.722121	0.0330209	21.8686	5.16788e-106	6.43291e-104	ENSG00000104635.15_SLC39A14	up	YES
2528.83	0.764745	0.0350246	21.8345	1.09192e-105	1.3449e-103	ENSG00000017483.15_SLC38A5	up	YES
17810	0.567161	0.0260062	21.8086	1.92064e-105	2.34098e-103	ENSG00000166598.16_HSP90B1	up	YES
1510.2	0.908715	0.0416733	21.8057	2.04864e-105	2.47125e-103	ENSG00000144867.13_SRPRB	up	YES
34096.6	0.411182	0.0188997	21.756	6.06008e-105	7.23562e-103	ENSG00000196878.15_LAMB3	up	YES
1802.75	0.849566	0.0392489	21.6456	6.68402e-104	7.89998e-102	ENSG00000108639.8_SYNGR2	up	YES
4170.21	0.873617	0.0404309	21.6077	1.5219e-103	1.78078e-101	ENSG00000008394.13_MGST1	up	YES
5026.8	0.587868	0.0272202	21.5968	1.92682e-103	2.23225e-101	ENSG00000003056.8_M6PR	up	YES
2966.36	0.68951	0.0320124	21.5389	6.73405e-103	7.72502e-101	ENSG00000168615.13_ADAM9	up	YES
6404.83	0.551124	0.0255934	21.5338	7.51e-103	8.53151e-101	ENSG00000185896.11_LAMP1	up	YES
901.632	-1.11338	0.0518157	-21.4873	2.04454e-102	2.3003e-100	ENSG00000204371.11_EHMT2	down	YES
3699.22	0.695883	0.0324915	21.4174	9.19701e-102	1.0249e-99	ENSG00000125991.20_ERGIC3	up	YES
3909.64	0.666908	0.0312159	21.3643	2.86918e-101	3.1672e-99	ENSG00000140391.15_TSPAN3	up	YES
2969.23	0.667858	0.0312783	21.3521	3.72996e-101	4.07891e-99	ENSG00000197858.11_GPAA1	up	YES
2463.88	0.740493	0.0346826	21.3505	3.8549e-101	4.1765e-99	ENSG00000085063.17_CD59	up	YES
1698.43	0.827426	0.0387663	21.344	4.43756e-101	4.76366e-99	ENSG00000134153.10_EMC7	up	YES
40069.3	0.406473	0.0192087	21.1609	2.1914e-99	2.33106e-97	ENSG00000210082.2_MT-RNR2	up	YES
4001.29	0.604282	0.0286192	21.1146	5.84517e-99	6.16165e-97	ENSG00000077147.16_TM9SF3	up	YES
4661.1	0.594166	0.0282824	21.0083	5.50682e-98	5.75315e-96	ENSG00000103512.15_NOMO1	up	YES
4056.73	0.600745	0.0286333	20.9806	9.8583e-98	1.01537e-95	ENSG00000030582.18_GRN	up	YES
2808.41	0.678217	0.0323261	20.9805	9.89247e-98	1.01537e-95	ENSG00000139278.10_GLIPR1	up	YES
2317.64	0.716949	0.0342244	20.9485	1.93817e-97	1.97205e-95	ENSG00000109133.13_TMEM33	up	YES
1208.78	0.998321	0.0477174	20.9215	3.41102e-97	3.44072e-95	ENSG00000116209.12_TMEM59	up	YES
15194.9	0.434886	0.0208263	20.8815	7.8839e-97	7.88457e-95	ENSG00000206503.13_HLA-A	up	YES
2535.29	0.711951	0.0341767	20.8314	2.24577e-96	2.22693e-94	ENSG00000151348.16_EXT2	up	YES
827.896	1.08488	0.0522266	20.7725	7.67775e-96	7.54936e-94	ENSG00000107798.18_LIPA	up	YES
231.359	6.42342	0.309561	20.7501	1.2239e-95	1.1934e-93	ENSG00000177675.9_CD163L1	up	YES
4074.72	0.594433	0.0286509	20.7474	1.29421e-95	1.25154e-93	ENSG00000163297.18_ANTXR2	up	YES
9503.94	0.497463	0.0240485	20.6859	4.64242e-95	4.45254e-93	ENSG00000147649.10_MTDH	up	YES
1138.04	0.963488	0.0468574	20.5621	5.99195e-94	5.70014e-92	ENSG00000102158.21_MAGT1	up	YES
2566.83	0.762605	0.0371199	20.5444	8.64115e-94	8.15404e-92	ENSG00000069849.11_ATP1B3	up	YES
2659.72	0.697362	0.0339824	20.5213	1.39049e-93	1.30161e-91	ENSG00000173530.6_TNFRSF10D	up	YES
1964.33	0.748241	0.0366331	20.4253	9.96708e-93	9.25594e-91	ENSG00000023318.8_ERP44	up	YES
1464.06	0.836165	0.0409542	20.4171	1.17959e-92	1.0868e-90	ENSG00000136240.10_KDELR2	up	YES
11907.7	0.544586	0.0266868	20.4066	1.46062e-92	1.33522e-90	ENSG00000116133.13_DHCR24	up	YES
2367.42	0.68471	0.0337244	20.3031	1.20785e-91	1.09559e-89	ENSG00000116260.17_QSOX1	up	YES
1962.65	0.790137	0.0389636	20.2788	1.97744e-91	1.77985e-89	ENSG00000183726.11_TMEM50A	up	YES
2712.97	0.647047	0.0320017	20.2192	6.64083e-91	5.93163e-89	ENSG00000164733.22_CTSB	up	YES
3075.59	0.633213	0.0313431	20.2026	9.28297e-91	8.22879e-89	ENSG00000102007.11_PLP2	up	YES
3153.74	0.640284	0.0318587	20.0977	7.73621e-90	6.80612e-88	ENSG00000101294.18_HM13	up	YES
1570.87	0.799196	0.0398397	20.0603	1.64117e-89	1.43309e-87	ENSG00000138018.18_SELENOI	up	YES
1380.23	0.839964	0.0419985	19.9998	5.52402e-89	4.78789e-87	ENSG00000213593.10_TMX2	up	YES
1813.2	0.781699	0.0392706	19.9054	3.65047e-88	3.14075e-86	ENSG00000129103.19_SUMF2	up	YES
9024.76	0.48529	0.0244	19.8889	5.07492e-88	4.33442e-86	ENSG00000129226.14_CD68	up	YES
2544.99	0.656705	0.0330364	19.8782	6.27912e-88	5.32405e-86	ENSG00000133872.14_SARAF	up	YES
1170.9	0.958075	0.0483008	19.8356	1.46735e-87	1.23521e-85	ENSG00000137509.12_PRCP	up	YES
7687.33	0.492347	0.024847	19.8151	2.20393e-87	1.84201e-85	ENSG00000131469.15_RPL27	up	YES
12338.1	0.570764	0.0289085	19.7438	9.06717e-87	7.52447e-85	ENSG00000168028.14_RPSA	up	YES
2740.22	0.659527	0.0334172	19.7362	1.05492e-86	8.69273e-85	ENSG00000104331.9_BPNT2	up	YES
4041.76	0.56283	0.0285224	19.7329	1.12543e-86	9.20887e-85	ENSG00000153395.10_LPCAT1	up	YES
4622.77	0.551829	0.0280985	19.6391	7.16236e-86	5.81991e-84	ENSG00000001630.17_CYP51A1	up	YES
1907.99	0.733369	0.0374876	19.5629	3.20036e-85	2.58258e-83	ENSG00000066322.15_ELOVL1	up	YES
6706.16	0.497307	0.0255666	19.4514	2.83518e-84	2.25998e-82	ENSG00000135047.16_CTSL	up	YES
29574.8	0.510675	0.026254	19.4513	2.83922e-84	2.25998e-82	ENSG00000150093.20_ITGB1	up	YES
3450.26	0.764103	0.0393884	19.3992	7.83695e-84	6.19596e-82	ENSG00000167779.9_IGFBP6	up	YES
18652.5	0.658092	0.0340085	19.3508	2.00631e-83	1.57556e-81	ENSG00000127022.16_CANX	up	YES
3462.18	0.727371	0.0376261	19.3316	2.91322e-83	2.2725e-81	ENSG00000118363.12_SPCS2	up	YES
1050.06	0.925635	0.0479987	19.2846	7.23644e-83	5.60752e-81	ENSG00000180879.14_SSR4	up	YES
23032.9	-0.435132	0.022583	-19.2681	9.94585e-83	7.65634e-81	ENSG00000137309.20_HMGA1	down	YES
25433.9	0.562637	0.0292281	19.2499	1.41543e-82	1.08248e-80	ENSG00000149273.15_RPS3	up	YES
5775.19	0.506479	0.026319	19.2439	1.58851e-82	1.20696e-80	ENSG00000135506.16_OS9	up	YES
3281.42	0.582698	0.0304142	19.1588	8.17997e-82	6.17508e-80	ENSG00000143570.19_SLC39A1	up	YES
1114.11	1.09812	0.05743	19.121	1.68976e-81	1.26743e-79	ENSG00000100528.12_CNIH1	up	YES
2780.48	0.619195	0.032429	19.0939	2.83963e-81	2.11634e-79	ENSG00000182934.12_SRPRA	up	YES
1476.26	0.77707	0.0408222	19.0355	8.67115e-81	6.42159e-79	ENSG00000063660.9_GPC1	up	YES
1659.36	0.740664	0.0389635	19.0092	1.43209e-80	1.05389e-78	ENSG00000110108.10_TMEM109	up	YES
4111.97	0.540197	0.0284333	18.9988	1.74609e-80	1.27694e-78	ENSG00000184840.12_TMED9	up	YES
1272.8	0.827711	0.0435722	18.9963	1.82977e-80	1.32982e-78	ENSG00000117906.14_RCN2	up	YES
1194.36	0.830193	0.0438433	18.9355	5.8196e-80	4.2034e-78	ENSG00000170881.5_RNF139	up	YES
1100.83	0.863297	0.04583	18.8369	3.76062e-79	2.69957e-77	ENSG00000075790.12_BCAP29	up	YES
2664.22	0.644587	0.0342341	18.8288	4.38859e-79	3.13115e-77	ENSG00000145050.19_MANF	up	YES
4976.16	0.498376	0.0265045	18.8035	7.0723e-79	5.01533e-77	ENSG00000104549.12_SQLE	up	YES
4090.53	0.547307	0.0291103	18.8011	7.39367e-79	5.21164e-77	ENSG00000117984.15_CTSD	up	YES
2950.61	0.681721	0.0362969	18.7818	1.0638e-78	7.45358e-77	ENSG00000160932.11_LY6E	up	YES
3939.86	0.531408	0.0283189	18.7651	1.45734e-78	1.01502e-76	ENSG00000183255.12_PTTG1IP	up	YES
869.707	1.00116	0.0533768	18.7564	1.71493e-78	1.18736e-76	ENSG00000118276.12_B4GALT6	up	YES
680.368	1.12838	0.0602935	18.7147	3.75595e-78	2.5852e-76	ENSG00000198856.13_OSTC	up	YES
2747.18	0.621651	0.0332496	18.6965	5.28553e-78	3.61672e-76	ENSG00000163527.10_STT3B	up	YES
6155.73	0.530859	0.0284259	18.6751	7.88812e-78	5.36621e-76	ENSG00000105281.12_SLC1A5	up	YES
872.009	0.946997	0.0507448	18.662	1.0097e-77	6.82918e-76	ENSG00000095209.12_TMEM38B	up	YES
1421.98	0.778793	0.0418192	18.6229	2.09711e-77	1.41024e-75	ENSG00000141349.9_G6PC3	up	YES
2277.13	0.681169	0.0365997	18.6113	2.60077e-77	1.73895e-75	ENSG00000133318.14_RTN3	up	YES
2825.61	0.589162	0.0316596	18.6093	2.70177e-77	1.79622e-75	ENSG00000167772.12_ANGPTL4	up	YES
917.292	0.926953	0.0499028	18.5752	5.10268e-77	3.37325e-75	ENSG00000159063.14_ALG8	up	YES
1193.78	0.896822	0.0482977	18.5686	5.76798e-77	3.79164e-75	ENSG00000206527.10_HACD2	up	YES
2626.64	0.68628	0.0370347	18.5307	1.16664e-76	7.62615e-75	ENSG00000169223.15_LMAN2	up	YES
1791.94	0.729014	0.0393825	18.5111	1.68073e-76	1.09257e-74	ENSG00000117394.24_SLC2A1	up	YES
1885.44	0.701275	0.0380354	18.4374	6.58114e-76	4.25447e-74	ENSG00000117500.13_TMED5	up	YES
6680.59	0.469252	0.0254667	18.4261	8.11224e-76	5.21546e-74	ENSG00000168003.18_SLC3A2	up	YES
1835.38	0.689308	0.0374345	18.4137	1.01956e-75	6.51904e-74	ENSG00000135926.15_TMBIM1	up	YES
991.959	0.888239	0.0483639	18.3658	2.47011e-75	1.5708e-73	ENSG00000147155.11_EBP	up	YES
1278.51	0.833435	0.0454006	18.3573	2.88411e-75	1.82416e-73	ENSG00000117335.20_CD46	up	YES
1474.85	0.741358	0.0404607	18.3229	5.43335e-75	3.41804e-73	ENSG00000026508.20_CD44	up	YES
2038.65	0.678229	0.0370215	18.3199	5.74558e-75	3.59514e-73	ENSG00000136868.11_SLC31A1	up	YES
889.648	0.914546	0.0499632	18.3044	7.63567e-75	4.75239e-73	ENSG00000105404.11_RABAC1	up	YES
1277.44	0.823183	0.0449958	18.2946	9.12897e-75	5.65175e-73	ENSG00000091317.8_CMTM6	up	YES
2962.18	0.567332	0.0314165	18.0584	6.77807e-73	4.17422e-71	ENSG00000008952.17_SEC62	up	YES
5849.48	0.4738	0.0262774	18.0307	1.11851e-72	6.85222e-71	ENSG00000198363.18_ASPH	up	YES
1428.26	0.764789	0.0425359	17.9799	2.80136e-72	1.70722e-70	ENSG00000111897.7_SERINC1	up	YES
1446.01	0.776941	0.0433189	17.9354	6.24552e-72	3.78647e-70	ENSG00000125304.10_TM9SF2	up	YES
4148.11	0.532898	0.0297287	17.9254	7.47358e-72	4.50765e-70	ENSG00000089327.15_FXYD5	up	YES
2437.39	0.596135	0.0333265	17.8878	1.46922e-71	8.81607e-70	ENSG00000104805.16_NUCB1	up	YES
929.638	0.975869	0.0546002	17.873	1.91511e-71	1.1433e-69	ENSG00000138085.17_ATRAID	up	YES
4929.32	0.487488	0.0272937	17.8608	2.38052e-71	1.41393e-69	ENSG00000149428.19_HYOU1	up	YES
1258.14	0.795173	0.0445424	17.852	2.78692e-71	1.64696e-69	ENSG00000129625.13_REEP5	up	YES
1489.71	0.72554	0.040785	17.7894	8.54097e-71	5.02201e-69	ENSG00000164930.12_FZD6	up	YES
2225.36	0.624477	0.0351532	17.7644	1.33241e-70	7.79529e-69	ENSG00000141424.13_SLC39A6	up	YES
1386.58	0.76082	0.0428903	17.7387	2.106e-70	1.22599e-68	ENSG00000168394.12_TAP1	up	YES
2273.88	0.614047	0.03469	17.701	4.11854e-70	2.3857e-68	ENSG00000226479.4_TMEM185B	up	YES
2144.37	0.624041	0.0352716	17.6924	4.79479e-70	2.76374e-68	ENSG00000136827.12_TOR1A	up	YES
3291.93	0.539459	0.0305336	17.6677	7.44001e-70	4.26743e-68	ENSG00000115884.11_SDC1	up	YES
484.419	1.18353	0.0670374	17.6548	9.33946e-70	5.33078e-68	ENSG00000000003.15_TSPAN6	up	YES
715.953	0.969299	0.055007	17.6214	1.68812e-69	9.58867e-68	ENSG00000102471.14_NDFIP2	up	YES
9239.46	0.441694	0.0251203	17.5832	3.31401e-69	1.87329e-67	ENSG00000124614.16_RPS10	up	YES
1480.66	0.771575	0.0439633	17.5504	5.90331e-69	3.3209e-67	ENSG00000136156.15_ITM2B	up	YES
5304.85	0.481675	0.0274682	17.5357	7.64355e-69	4.27929e-67	ENSG00000110917.8_MLEC	up	YES
1376.31	0.727743	0.0415594	17.5109	1.18309e-68	6.59204e-67	ENSG00000100612.14_DHRS7	up	YES
2395.03	0.601343	0.0343936	17.4842	1.89168e-68	1.04903e-66	ENSG00000135677.11_GNS	up	YES
2899.74	0.593423	0.0339915	17.458	2.9918e-68	1.65128e-66	ENSG00000106397.12_PLOD3	up	YES
3266.03	0.548464	0.0314259	17.4526	3.289e-68	1.80679e-66	ENSG00000180398.13_MCFD2	up	YES
1040.55	0.808557	0.0463295	17.4523	3.30484e-68	1.80701e-66	ENSG00000111684.11_LPCAT3	up	YES
1432.5	0.752509	0.0431359	17.4451	3.75283e-68	2.04241e-66	ENSG00000143815.15_LBR	up	YES
8455.88	0.459652	0.0263542	17.4413	4.00972e-68	2.17212e-66	ENSG00000174437.18_ATP2A2	up	YES
1799.4	0.680702	0.0390638	17.4254	5.29526e-68	2.85529e-66	ENSG00000120265.19_PCMT1	up	YES
3194.75	0.529883	0.0304184	17.4198	5.83498e-68	3.13189e-66	ENSG00000185803.12_SLC52A2	up	YES
880.165	0.920746	0.0528643	17.4172	6.11368e-68	3.26649e-66	ENSG00000100600.15_LGMN	up	YES
103.73	3.53423	0.203308	17.3836	1.09822e-67	5.84105e-66	ENSG00000169247.14_SH3TC2	up	YES
2498.37	0.590129	0.0340021	17.3557	1.78751e-67	9.46409e-66	ENSG00000124155.18_PIGT	up	YES
1203.42	0.770951	0.0444481	17.345	2.15324e-67	1.13491e-65	ENSG00000117862.13_TXNDC12	up	YES
1497.71	0.68767	0.0397322	17.3076	4.1191e-67	2.16133e-65	ENSG00000109084.14_TMEM97	up	YES
2686.47	0.587184	0.0339675	17.2867	5.92983e-67	3.09754e-65	ENSG00000173726.11_TOMM20	up	YES
6010.69	0.591511	0.0343684	17.2109	2.20088e-66	1.14455e-64	ENSG00000171863.15_RPS7	up	YES
2173.25	0.600786	0.0349554	17.1872	3.31074e-66	1.71411e-64	ENSG00000132824.14_SERINC3	up	YES
1360.48	0.72343	0.0421219	17.1747	4.10973e-66	2.11841e-64	ENSG00000157224.16_CLDN12	up	YES
2246.02	0.617221	0.0359783	17.1554	5.73126e-66	2.9413e-64	ENSG00000101439.9_CST3	up	YES
951.45	0.890861	0.0520566	17.1133	1.18093e-65	6.03408e-64	ENSG00000138138.14_ATAD1	up	YES
723.246	0.941287	0.055012	17.1106	1.23761e-65	6.29618e-64	ENSG00000166562.9_SEC11C	up	YES
1943.96	0.619312	0.0362115	17.1026	1.4181e-65	7.18321e-64	ENSG00000157593.19_SLC35B2	up	YES
1357.29	0.744827	0.0435582	17.0996	1.4942e-65	7.53606e-64	ENSG00000087502.18_ERGIC2	up	YES
13650.5	0.366195	0.0214163	17.0989	1.51359e-65	7.60107e-64	ENSG00000105193.9_RPS16	up	YES
2658.28	0.566394	0.033158	17.0817	2.03284e-65	1.01651e-63	ENSG00000171867.18_PRNP	up	YES
1566.98	0.673419	0.039582	17.0133	6.54716e-65	3.25993e-63	ENSG00000213614.11_HEXA	up	YES
1061.81	0.880913	0.0518374	16.9938	9.13083e-65	4.52711e-63	ENSG00000166557.14_TMED3	up	YES
1490.13	0.696159	0.0410222	16.9703	1.36234e-64	6.72607e-63	ENSG00000182534.14_MXRA7	up	YES
8876.91	0.463721	0.027348	16.9563	1.73016e-64	8.50615e-63	ENSG00000163399.16_ATP1A1	up	YES
3844.09	0.482627	0.0285435	16.9085	3.89687e-64	1.90784e-62	ENSG00000112473.18_SLC39A7	up	YES
17619.7	0.388837	0.0232204	16.7455	6.11138e-63	2.97955e-61	ENSG00000133112.17_TPT1	up	YES
584.071	1.08664	0.0649022	16.7427	6.40301e-63	3.10878e-61	ENSG00000111711.10_GOLT1B	up	YES
1846.03	0.627199	0.0374662	16.7404	6.65518e-63	3.21786e-61	ENSG00000049860.14_HEXB	up	YES
1803.96	0.629919	0.0376685	16.7227	8.95681e-63	4.3129e-61	ENSG00000134291.12_TMEM106C	up	YES
1048.85	0.785619	0.0470121	16.711	1.08999e-62	5.22705e-61	ENSG00000155189.12_AGPAT5	up	YES
2505.38	0.583957	0.0350376	16.6666	2.29307e-62	1.09515e-60	ENSG00000112514.18_CUTA	up	YES
2536.7	0.609922	0.0366895	16.6239	4.67898e-62	2.22556e-60	ENSG00000105438.9_KDELR1	up	YES
7055.1	0.605602	0.0364701	16.6054	6.36484e-62	3.01518e-60	ENSG00000164587.13_RPS14	up	YES
1281.88	0.794554	0.0478645	16.6001	6.96099e-62	3.2843e-60	ENSG00000116857.17_TMEM9	up	YES
971.268	0.859542	0.0517992	16.5937	7.73672e-62	3.63564e-60	ENSG00000182220.15_ATP6AP2	up	YES
2974.5	0.547219	0.0329982	16.5833	9.20291e-62	4.30733e-60	ENSG00000067704.10_IARS2	up	YES
1795.52	0.658209	0.0397201	16.5712	1.12592e-61	5.24876e-60	ENSG00000140612.14_SEC11A	up	YES
2492.4	0.544282	0.0328523	16.5676	1.19578e-61	5.5523e-60	ENSG00000104853.16_CLPTM1	up	YES
2309.56	0.563122	0.0340292	16.5482	1.65005e-61	7.63134e-60	ENSG00000072042.13_RDH11	up	YES
12564.1	-0.389089	0.0235382	-16.5301	2.22891e-61	1.02679e-59	ENSG00000182774.13_RPS17	down	YES
3575.53	0.520517	0.031572	16.4867	4.57414e-61	2.0989e-59	ENSG00000149257.16_SERPINH1	up	YES
3166.26	0.513225	0.0313415	16.3752	2.87396e-60	1.3136e-58	ENSG00000108588.14_CCDC47	up	YES
2317.65	0.557083	0.0340522	16.3597	3.71049e-60	1.68936e-58	ENSG00000120885.22_CLU	up	YES
1662.34	0.652344	0.0398824	16.3567	3.89603e-60	1.76695e-58	ENSG00000102580.15_DNAJC3	up	YES
679.553	0.918629	0.0562778	16.3231	6.76159e-60	3.05472e-58	ENSG00000152700.14_SAR1B	up	YES
630.73	0.954276	0.0585719	16.2924	1.1175e-59	5.02919e-58	ENSG00000128564.7_VGF	up	YES
892.168	0.83195	0.0512273	16.2404	2.61393e-59	1.17186e-57	ENSG00000147475.17_ERLIN2	up	YES
5616.74	-0.462559	0.0285713	-16.1896	5.97046e-59	2.66643e-57	ENSG00000253729.8_PRKDC	down	YES
749.972	0.878839	0.0543346	16.1746	7.62358e-59	3.39177e-57	ENSG00000050130.18_JKAMP	up	YES
941.161	0.849032	0.052543	16.1588	9.84449e-59	4.36327e-57	ENSG00000155304.6_HSPA13	up	YES
1223.88	0.716974	0.0445791	16.0832	3.34704e-58	1.47787e-56	ENSG00000161671.17_EMC10	up	YES
1731.35	0.608623	0.0378958	16.0604	4.83045e-58	2.12485e-56	ENSG00000143337.19_TOR1AIP1	up	YES
1140.5	0.712678	0.0444178	16.0449	6.20872e-58	2.72091e-56	ENSG00000124145.6_SDC4	up	YES
960.824	0.766632	0.0478194	16.0318	7.66301e-58	3.3457e-56	ENSG00000166479.10_TMX3	up	YES
10577.2	0.407063	0.0254342	16.0046	1.18761e-57	5.16589e-56	ENSG00000099194.6_SCD	up	YES
3138.43	0.502502	0.0314566	15.9745	1.9254e-57	8.34413e-56	ENSG00000141526.18_SLC16A3	up	YES
1369.73	0.6718	0.0421677	15.9316	3.82449e-57	1.65131e-55	ENSG00000116729.14_WLS	up	YES
1143.4	0.729544	0.0459264	15.8851	8.04141e-57	3.45928e-55	ENSG00000134851.13_TMEM165	up	YES
1938.39	0.590353	0.0371666	15.8839	8.18668e-57	3.50888e-55	ENSG00000054179.12_ENTPD2	up	YES
1674.57	0.657424	0.0414118	15.8753	9.39576e-57	4.0124e-55	ENSG00000177239.16_MAN1B1	up	YES
2297.58	0.546044	0.0344764	15.8382	1.69672e-56	7.21938e-55	ENSG00000166145.15_SPINT1	up	YES
1992.15	0.586342	0.0370273	15.8354	1.77348e-56	7.51867e-55	ENSG00000099797.15_TECR	up	YES
951.295	0.769933	0.0486506	15.8257	2.06725e-56	8.73244e-55	ENSG00000164308.17_ERAP2	up	YES
916.7	0.90656	0.0574488	15.7803	4.24962e-56	1.78866e-54	ENSG00000198832.10_SELENOM	up	YES
1288.46	0.692742	0.0439187	15.7733	4.75179e-56	1.99286e-54	ENSG00000124532.15_MRS2	up	YES
2126.9	0.597316	0.0378716	15.7721	4.83883e-56	2.02211e-54	ENSG00000071553.18_ATP6AP1	up	YES
1901.3	0.576637	0.0365612	15.7718	4.86317e-56	2.02505e-54	ENSG00000171298.13_GAA	up	YES
2443.71	0.536149	0.0341193	15.714	1.21311e-55	5.03356e-54	ENSG00000106771.13_TMEM245	up	YES
1223.62	0.701166	0.0446263	15.7119	1.25269e-55	5.1794e-54	ENSG00000204386.12_NEU1	up	YES
1951.98	0.60853	0.0388724	15.6546	3.09228e-55	1.27404e-53	ENSG00000123989.14_CHPF	up	YES
1013.89	0.731538	0.0469005	15.5977	7.55174e-55	3.10045e-53	ENSG00000163382.13_NAXE	up	YES
2235.23	0.556957	0.0357207	15.592	8.24956e-55	3.37511e-53	ENSG00000115307.17_AUP1	up	YES
1143.41	0.698052	0.0447753	15.5901	8.49872e-55	3.46493e-53	ENSG00000174607.11_UGT8	up	YES
2339.16	0.5694	0.0366332	15.5433	1.76682e-54	7.17833e-53	ENSG00000234741.8_GAS5	up	YES
3046.21	0.510825	0.0328838	15.5342	2.03556e-54	8.24156e-53	ENSG00000167114.13_SLC27A4	up	YES
2529.74	-0.516485	0.0332721	-15.5231	2.42129e-54	9.76948e-53	ENSG00000111252.11_SH2B3	down	YES
694.257	0.948339	0.0611292	15.5137	2.80351e-54	1.12728e-52	ENSG00000139180.11_NDUFA9	up	YES
1636.85	0.613196	0.0396068	15.4821	4.58435e-54	1.83704e-52	ENSG00000073060.17_SCARB1	up	YES
1276.12	0.712986	0.0460595	15.4797	4.75786e-54	1.90006e-52	ENSG00000114902.14_SPCS1	up	YES
637.299	0.905597	0.0585154	15.4762	5.02184e-54	1.99866e-52	ENSG00000102393.14_GLA	up	YES
707.326	0.86369	0.055825	15.4714	5.41314e-54	2.14709e-52	ENSG00000058804.12_NDC1	up	YES
1356.98	0.751632	0.0486477	15.4505	7.48472e-54	2.95874e-52	ENSG00000131507.11_NDFIP1	up	YES
664.062	0.874915	0.0570277	15.3419	4.01097e-53	1.58022e-51	ENSG00000170439.7_METTL7B	up	YES
370.031	1.15036	0.0749989	15.3384	4.23707e-53	1.66369e-51	ENSG00000164647.9_STEAP1	up	YES
1702.43	0.608707	0.0397031	15.3315	4.71269e-53	1.84425e-51	ENSG00000172889.16_EGFL7	up	YES
1256.87	0.667556	0.043571	15.3211	5.5258e-53	2.15525e-51	ENSG00000005893.16_LAMP2	up	YES
1031.09	0.759503	0.0495766	15.3198	5.64033e-53	2.19261e-51	ENSG00000118855.21_MFSD1	up	YES
754.23	0.817444	0.0533838	15.3126	6.30043e-53	2.44111e-51	ENSG00000125827.9_TMX4	up	YES
761.784	0.899111	0.0587455	15.3052	7.05878e-53	2.7259e-51	ENSG00000111843.14_TMEM14C	up	YES
462.945	1.04512	0.0682939	15.3033	7.2686e-53	2.79769e-51	ENSG00000142892.15_PIGK	up	YES
375.462	1.20357	0.0787068	15.2919	8.66015e-53	3.32237e-51	ENSG00000143369.15_ECM1	up	YES
4161.93	0.478391	0.0313005	15.2838	9.80291e-53	3.74849e-51	ENSG00000064601.21_CTSA	up	YES
902.202	0.773024	0.0508267	15.209	3.08222e-52	1.17476e-50	ENSG00000145354.12_CISD2	up	YES
842.059	0.771578	0.0508383	15.1771	5.01354e-52	1.90466e-50	ENSG00000169105.8_CHST14	up	YES
2027.31	0.542522	0.0357731	15.1656	5.97146e-52	2.26123e-50	ENSG00000196937.11_FAM3C	up	YES
577.681	0.910449	0.0600387	15.1644	6.08731e-52	2.29767e-50	ENSG00000113583.8_C5orf15	up	YES
705.679	0.938204	0.0619075	15.1549	7.02874e-52	2.64448e-50	ENSG00000123353.10_ORMDL2	up	YES
1941.75	0.588725	0.0388561	15.1514	7.4137e-52	2.78038e-50	ENSG00000148110.16_MFSD14B	up	YES
830.593	0.775507	0.0511909	15.1493	7.65688e-52	2.8624e-50	ENSG00000081087.15_OSTM1	up	YES
1664.15	0.575222	0.0380491	15.1179	1.23405e-51	4.584e-50	ENSG00000108582.12_CPD	up	YES
2727.2	0.488649	0.0323223	15.118	1.23162e-51	4.584e-50	ENSG00000172893.17_DHCR7	up	YES
1629.64	0.596	0.0394849	15.0944	1.76296e-51	6.52799e-50	ENSG00000113161.17_HMGCR	up	YES
7816.44	0.38643	0.0256227	15.0816	2.14181e-51	7.90577e-50	ENSG00000110492.16_MDK	up	YES
888.769	0.772781	0.0512515	15.0782	2.25292e-51	8.28975e-50	ENSG00000121073.15_SLC35B1	up	YES
6149.28	-0.399572	0.0265015	-15.0773	2.28285e-51	8.37355e-50	ENSG00000174231.17_PRPF8	down	YES
1696.33	0.587917	0.0390683	15.0484	3.53535e-51	1.29272e-49	ENSG00000127948.16_POR	up	YES
1052.72	0.713219	0.0474953	15.0166	5.71554e-51	2.08341e-49	ENSG00000139624.14_CERS5	up	YES
464.029	1.04474	0.0696448	15.0009	7.23907e-51	2.63057e-49	ENSG00000120697.10_ALG5	up	YES
1241.36	0.710211	0.0473903	14.9864	9.0068e-51	3.2628e-49	ENSG00000134285.11_FKBP11	up	YES
1127.17	0.691417	0.0461553	14.9802	9.88575e-51	3.57016e-49	ENSG00000112378.12_PERP	up	YES
2936.75	0.469238	0.0313405	14.9722	1.11525e-50	4.01526e-49	ENSG00000125912.11_NCLN	up	YES
1112.62	0.754832	0.0506613	14.8996	3.31694e-50	1.19054e-48	ENSG00000005486.17_RHBDD2	up	YES
1413.79	-0.646147	0.0434996	-14.8541	6.5455e-50	2.34217e-48	ENSG00000145555.15_MYO10	down	YES
534.641	0.936221	0.06306	14.8465	7.32847e-50	2.61434e-48	ENSG00000197142.11_ACSL5	up	YES
1559.01	0.603295	0.0406601	14.8375	8.38136e-50	2.98086e-48	ENSG00000139163.16_ETNK1	up	YES
615.349	0.865259	0.0583261	14.8348	8.72e-50	3.0919e-48	ENSG00000143153.13_ATP1B1	up	YES
1501.1	0.595729	0.0402348	14.8063	1.33354e-49	4.71413e-48	ENSG00000179820.16_MYADM	up	YES
916.979	0.751401	0.0509162	14.7576	2.74907e-49	9.6888e-48	ENSG00000196776.17_CD47	up	YES
609.181	0.863249	0.0585115	14.7535	2.92158e-49	1.02659e-47	ENSG00000104660.19_LEPROTL1	up	YES
2579.5	0.498423	0.0338978	14.7037	6.10437e-49	2.13854e-47	ENSG00000049449.10_RCN1	up	YES
645.377	0.854451	0.0581311	14.6987	6.57111e-49	2.29518e-47	ENSG00000176142.13_TMEM39A	up	YES
678.207	0.829717	0.0565112	14.6823	8.36533e-49	2.90453e-47	ENSG00000085365.18_SCAMP1	up	YES
2736.06	0.480845	0.0327497	14.6824	8.3545e-49	2.90453e-47	ENSG00000135916.16_ITM2C	up	YES
8031.75	-0.359161	0.0244831	-14.6697	1.00733e-48	3.4872e-47	ENSG00000132475.10_H3-3B	down	YES
873.149	0.736323	0.0502571	14.6511	1.32532e-48	4.57451e-47	ENSG00000120725.13_SIL1	up	YES
16811.8	0.310669	0.0212556	14.6159	2.22553e-48	7.65911e-47	ENSG00000170889.14_RPS9	up	YES
1284.76	0.642457	0.0439621	14.6139	2.29119e-48	7.86195e-47	ENSG00000189362.12_NEMP2	up	YES
2545.12	0.521653	0.0357498	14.5918	3.16766e-48	1.08377e-46	ENSG00000173402.12_DAG1	up	YES
3633.83	0.443231	0.0303903	14.5846	3.51935e-48	1.20058e-46	ENSG00000143418.20_CERS2	up	YES
2102.74	-0.571269	0.0392209	-14.5654	4.66099e-48	1.58542e-46	ENSG00000167548.17_KMT2D	down	YES
1072.46	0.674804	0.046345	14.5604	5.01395e-48	1.70053e-46	ENSG00000110911.17_SLC11A2	up	YES
2186.41	0.5442	0.0374756	14.5214	8.86268e-48	2.99717e-46	ENSG00000112759.19_SLC29A1	up	YES
18311	-0.316451	0.0217963	-14.5186	9.23952e-48	3.11561e-46	ENSG00000122566.22_HNRNPA2B1	down	YES
1352.17	0.62554	0.0431104	14.5102	1.04423e-47	3.51107e-46	ENSG00000128791.12_TWSG1	up	YES
465.219	0.981504	0.0676669	14.5049	1.12743e-47	3.77996e-46	ENSG00000171155.8_C1GALT1C1	up	YES
1621.68	-0.589711	0.0407112	-14.4852	1.50202e-47	5.02148e-46	ENSG00000128731.18_HERC2	down	YES
2615.43	-0.538191	0.0371553	-14.4849	1.50956e-47	5.03229e-46	ENSG00000123908.12_AGO2	down	YES
636.759	0.840224	0.0581415	14.4514	2.45747e-47	8.16898e-46	ENSG00000163933.10_RFT1	up	YES
1265.4	0.661279	0.0457723	14.4471	2.6135e-47	8.66303e-46	ENSG00000180776.16_ZDHHC20	up	YES
4887.21	0.404964	0.0280594	14.4324	3.23692e-47	1.06992e-45	ENSG00000101160.15_CTSZ	up	YES
78.5421	5.19307	0.360381	14.4099	4.48136e-47	1.47708e-45	ENSG00000168685.15_IL7R	up	YES
874.652	0.737891	0.0512253	14.4048	4.82652e-47	1.58638e-45	ENSG00000106638.17_TBL2	up	YES
7152.91	0.345343	0.0239857	14.3978	5.33801e-47	1.74958e-45	ENSG00000105472.13_CLEC11A	up	YES
1477.34	0.610103	0.0424168	14.3835	6.56656e-47	2.14624e-45	ENSG00000143612.21_C1orf43	up	YES
5598.13	0.38813	0.0270398	14.354	1.00561e-46	3.27762e-45	ENSG00000114942.14_EEF1B2	up	YES
4224.78	0.551595	0.0384946	14.3292	1.43813e-46	4.67434e-45	ENSG00000185164.15_NOMO2	up	YES
460.757	1.01839	0.0713173	14.2798	2.92596e-46	9.48383e-45	ENSG00000155957.18_TMBIM4	up	YES
2827.48	-0.570456	0.0399522	-14.2784	2.98199e-46	9.63875e-45	ENSG00000086758.16_HUWE1	down	YES
1148.63	0.652802	0.0457672	14.2635	3.69293e-46	1.19039e-44	ENSG00000105854.13_PON2	up	YES
768.692	0.763753	0.0535542	14.2613	3.81289e-46	1.22568e-44	ENSG00000103978.16_TMEM87A	up	YES
790.068	0.741988	0.0521319	14.2329	5.7252e-46	1.83536e-44	ENSG00000145740.19_SLC30A5	up	YES
780.91	0.755698	0.053134	14.2225	6.64508e-46	2.12443e-44	ENSG00000105290.13_APLP1	up	YES
1065.45	0.666733	0.0469582	14.1984	9.36915e-46	2.98715e-44	ENSG00000014123.10_UFL1	up	YES
7755.08	0.403127	0.0284829	14.1533	1.78213e-45	5.6665e-44	ENSG00000114391.13_RPL24	up	YES
1921.29	0.520473	0.0367916	14.1465	1.96272e-45	6.2238e-44	ENSG00000197965.12_MPZL1	up	YES
440.396	0.973182	0.0688389	14.1371	2.24394e-45	7.09631e-44	ENSG00000198189.11_HSD17B11	up	YES
904.628	0.710991	0.0505205	14.0733	5.54138e-45	1.7477e-43	ENSG00000106799.13_TGFBR1	up	YES
3300.92	0.441059	0.031417	14.0389	9.01068e-45	2.83425e-43	ENSG00000163956.13_LRPAP1	up	YES
720.227	0.785394	0.0559894	14.0276	1.05726e-44	3.31662e-43	ENSG00000142227.11_EMP3	up	YES
679.279	0.857125	0.0611493	14.0169	1.22815e-44	3.84239e-43	ENSG00000159348.13_CYB5R1	up	YES
1471.71	0.601389	0.0429497	14.0022	1.51176e-44	4.7171e-43	ENSG00000157916.20_RER1	up	YES
517.978	0.904299	0.0645973	13.999	1.58004e-44	4.91704e-43	ENSG00000106460.19_TMEM106B	up	YES
1744.38	0.541587	0.0387214	13.9867	1.87821e-44	5.82943e-43	ENSG00000017260.20_ATP2C1	up	YES
854.252	0.718736	0.0514551	13.9682	2.43615e-44	7.54112e-43	ENSG00000033011.14_ALG1	up	YES
3740.57	0.454569	0.0325512	13.9648	2.55771e-44	7.89651e-43	ENSG00000204267.16_TAP2	up	YES
8911.03	0.335273	0.0240197	13.9583	2.80167e-44	8.62694e-43	ENSG00000167601.12_AXL	up	YES
19819	0.37624	0.0269831	13.9435	3.44407e-44	1.05772e-42	ENSG00000089157.16_RPLP0	up	YES
539.579	0.870601	0.0624495	13.9409	3.57466e-44	1.09495e-42	ENSG00000169446.6_MMGT1	up	YES
885.636	0.704674	0.0505842	13.9307	4.12146e-44	1.25914e-42	ENSG00000186283.14_TOR3A	up	YES
613.759	0.830856	0.0598349	13.8858	7.7228e-44	2.35324e-42	ENSG00000175283.8_DOLK	up	YES
1371.45	0.609242	0.0438807	13.884	7.91516e-44	2.40559e-42	ENSG00000071537.14_SEL1L	up	YES
2798.13	-0.495832	0.0357455	-13.8711	9.47492e-44	2.87218e-42	ENSG00000127481.15_UBR4	down	YES
1249.75	0.596265	0.0429925	13.869	9.75834e-44	2.95045e-42	ENSG00000128228.5_SDF2L1	up	YES
1057.72	0.656219	0.0473364	13.8629	1.06329e-43	3.20657e-42	ENSG00000198743.7_SLC5A3	up	YES
520.833	0.873066	0.0630094	13.8561	1.16815e-43	3.51377e-42	ENSG00000146802.13_TMEM168	up	YES
1907.08	0.508832	0.0367434	13.8483	1.30343e-43	3.91064e-42	ENSG00000101290.14_CDS2	up	YES
1471.45	0.572961	0.0414152	13.8346	1.57719e-43	4.71986e-42	ENSG00000100997.20_ABHD12	up	YES
548.002	0.859881	0.0621738	13.8303	1.67376e-43	4.99609e-42	ENSG00000109099.16_PMP22	up	YES
1153.35	0.647208	0.0468373	13.8182	1.97905e-43	5.89232e-42	ENSG00000057252.13_SOAT1	up	YES
3086.84	0.435769	0.0315368	13.8178	1.99095e-43	5.91272e-42	ENSG00000143537.14_ADAM15	up	YES
2552.16	-0.474335	0.0344167	-13.7821	3.26475e-43	9.67109e-42	ENSG00000189060.6_H1-0	down	YES
6640.22	0.425725	0.030927	13.7655	4.11114e-43	1.21476e-41	ENSG00000125835.19_SNRPB	up	YES
888.999	0.714335	0.0519003	13.7636	4.21933e-43	1.24359e-41	ENSG00000169908.12_TM4SF1	up	YES
1905.73	0.514716	0.037415	13.7569	4.62664e-43	1.36021e-41	ENSG00000125505.17_MBOAT7	up	YES
651.744	0.834955	0.0607122	13.7527	4.90709e-43	1.43904e-41	ENSG00000070081.17_NUCB2	up	YES
812.166	0.715524	0.0521844	13.7115	8.66948e-43	2.53604e-41	ENSG00000147535.17_PLPP5	up	YES
1444.18	0.554228	0.0404259	13.7097	8.87883e-43	2.5908e-41	ENSG00000104763.20_ASAH1	up	YES
1030.32	0.697252	0.0508749	13.7052	9.44768e-43	2.74993e-41	ENSG00000167397.15_VKORC1	up	YES
1918.69	0.49638	0.0362922	13.6773	1.38715e-42	4.02755e-41	ENSG00000101337.16_TM9SF4	up	YES
6482.85	0.359861	0.026366	13.6487	2.05559e-42	5.95358e-41	ENSG00000090863.12_GLG1	up	YES
1079.44	0.629473	0.0461608	13.6365	2.42887e-42	7.01732e-41	ENSG00000090520.12_DNAJB11	up	YES
6861.87	0.394818	0.0289596	13.6334	2.53507e-42	7.30613e-41	ENSG00000084234.18_APLP2	up	YES
1065.86	0.651562	0.0478408	13.6194	3.07161e-42	8.83069e-41	ENSG00000107566.14_ERLIN1	up	YES
7349.78	0.369055	0.0270987	13.6189	3.09095e-42	8.86452e-41	ENSG00000135052.16_GOLM1	up	YES
7824.89	0.41545	0.0305057	13.6187	3.09882e-42	8.86537e-41	ENSG00000142627.13_EPHA2	up	YES
816.04	0.720889	0.0529394	13.6172	3.1632e-42	9.02748e-41	ENSG00000146409.12_SLC18B1	up	YES
434.921	0.936541	0.0688598	13.6007	3.96613e-42	1.12914e-40	ENSG00000216490.4_IFI30	up	YES
2304.7	0.472142	0.0347194	13.5988	4.07012e-42	1.15593e-40	ENSG00000123983.15_ACSL3	up	YES
687.662	0.75783	0.055747	13.5941	4.34101e-42	1.22988e-40	ENSG00000109929.10_SC5D	up	YES
4175.9	0.392432	0.0288983	13.5798	5.27994e-42	1.49229e-40	ENSG00000132341.12_RAN	up	YES
700.322	-0.80424	0.0592264	-13.5791	5.33023e-42	1.50287e-40	ENSG00000173821.19_RNF213	down	YES
449.604	0.921137	0.0678402	13.578	5.40541e-42	1.5204e-40	ENSG00000055211.14_GINM1	up	YES
2598.64	0.443182	0.0326459	13.5754	5.60163e-42	1.57181e-40	ENSG00000115275.14_MOGS	up	YES
3052.67	-0.449686	0.0331274	-13.5744	5.6785e-42	1.58957e-40	ENSG00000172534.14_HCFC1	down	YES
6165.02	0.42203	0.0311238	13.5597	6.94057e-42	1.93822e-40	ENSG00000115310.18_RTN4	up	YES
5620.2	-0.35123	0.0259647	-13.5272	1.08101e-41	3.01163e-40	ENSG00000204469.13_PRRC2A	down	YES
799.635	0.713277	0.0528685	13.4915	1.75419e-41	4.87549e-40	ENSG00000131871.15_SELENOS	up	YES
2167.66	0.463356	0.0344323	13.457	2.80018e-41	7.7642e-40	ENSG00000114631.11_PODXL2	up	YES
1275.09	0.582367	0.0432873	13.4535	2.9346e-41	8.11767e-40	ENSG00000158604.15_TMED4	up	YES
869.905	0.687807	0.0511591	13.4445	3.31828e-41	9.15736e-40	ENSG00000080822.17_CLDND1	up	YES
1049.51	0.683158	0.0508227	13.442	3.43064e-41	9.44516e-40	ENSG00000100926.15_TM9SF1	up	YES
1020.88	0.658215	0.0490547	13.418	4.74408e-41	1.30306e-39	ENSG00000145860.12_RNF145	up	YES
975.157	0.666928	0.0497907	13.3946	6.49941e-41	1.78102e-39	ENSG00000173852.15_DPY19L1	up	YES
1695.95	0.529623	0.0395554	13.3894	6.97375e-41	1.90654e-39	ENSG00000119537.18_KDSR	up	YES
618.351	0.863422	0.0645023	13.3859	7.31103e-41	1.99409e-39	ENSG00000119977.22_TCTN3	up	YES
7413.43	0.45815	0.0342546	13.3748	8.48429e-41	2.30871e-39	ENSG00000163682.17_RPL9	up	YES
1166.96	-0.617846	0.04623	-13.3646	9.73377e-41	2.64257e-39	ENSG00000137815.14_RTF1	down	YES
1577.37	0.522877	0.0392386	13.3256	1.64329e-40	4.44068e-39	ENSG00000002586.20_CD99	up	YES
1577.37	0.522877	0.0392386	13.3256	1.64329e-40	4.44068e-39	ENSG00000002586.20_PAR_Y_CD99	up	YES
3416.98	-0.450234	0.033809	-13.317	1.84418e-40	4.97206e-39	ENSG00000076108.12_BAZ2A	down	YES
517.655	0.982769	0.0739635	13.2872	2.74642e-40	7.38755e-39	ENSG00000168216.13_LMBRD1	up	YES
1966.79	0.500992	0.0377247	13.2802	3.01514e-40	8.09178e-39	ENSG00000113194.13_FAF2	up	YES
5994.99	-0.54515	0.0410675	-13.2745	3.25522e-40	8.71609e-39	ENSG00000161681.16_SHANK1	down	YES
1727.73	0.506602	0.0382052	13.26	3.94814e-40	1.05473e-38	ENSG00000137845.15_ADAM10	up	YES
1040.22	0.627744	0.0474147	13.2394	5.19332e-40	1.38421e-38	ENSG00000170017.12_ALCAM	up	YES
2067.05	0.469055	0.035442	13.2344	5.55126e-40	1.47626e-38	ENSG00000213741.11_RPS29	up	YES
819.349	-0.744097	0.0562447	-13.2296	5.91739e-40	1.57005e-38	ENSG00000080603.17_SRCAP	down	YES
550.832	0.845052	0.0639188	13.2207	6.66374e-40	1.76408e-38	ENSG00000255639.3_RP11-234B24.6	up	YES
1170.59	0.592231	0.0448404	13.2075	7.9387e-40	2.09686e-38	ENSG00000156642.17_NPTN	up	YES
2154.34	0.459628	0.034849	13.1891	1.01373e-39	2.67155e-38	ENSG00000204592.9_HLA-E	up	YES
2336.8	0.446989	0.0339064	13.183	1.09922e-39	2.89034e-38	ENSG00000112655.16_PTK7	up	YES
4253.8	-0.399141	0.0303139	-13.1669	1.35992e-39	3.5678e-38	ENSG00000288701.1_PRRC2B	down	YES
980.582	0.715873	0.0544085	13.1574	1.54336e-39	4.04001e-38	ENSG00000170266.16_GLB1	up	YES
2832.58	0.451477	0.0343516	13.1428	1.87169e-39	4.88853e-38	ENSG00000108561.8_C1QBP	up	YES
492.456	0.902877	0.0687255	13.1374	2.00893e-39	5.23529e-38	ENSG00000167904.15_TMEM68	up	YES
642.071	0.743952	0.0566576	13.1307	2.19734e-39	5.71358e-38	ENSG00000126821.8_SGPP1	up	YES
1743.25	0.514646	0.0392676	13.1061	3.03801e-39	7.882e-38	ENSG00000077232.19_DNAJC10	up	YES
7910.81	0.460343	0.0351735	13.0878	3.86687e-39	1.00102e-37	ENSG00000130303.14_BST2	up	YES
1078.44	0.592247	0.0454931	13.0184	9.61475e-39	2.48349e-37	ENSG00000186480.13_INSIG1	up	YES
556.746	0.801663	0.0615801	13.0182	9.63753e-39	2.48389e-37	ENSG00000138600.10_SPPL2A	up	YES
2294.35	0.45869	0.0353737	12.967	1.88376e-38	4.84436e-37	ENSG00000198113.3_TOR4A	up	YES
8399.47	-0.30477	0.0235174	-12.9594	2.07992e-38	5.3371e-37	ENSG00000177606.8_JUN	down	YES
470.57	0.855921	0.0660579	12.9571	2.14124e-38	5.48243e-37	ENSG00000169255.15_B3GALNT1	up	YES
2742.11	0.413747	0.03194	12.9539	2.23298e-38	5.70482e-37	ENSG00000130309.11_COLGALT1	up	YES
1265.73	0.559319	0.0431916	12.9497	2.35881e-38	6.01317e-37	ENSG00000070413.20_DGCR2	up	YES
2566.84	0.429225	0.0331588	12.9445	2.52351e-38	6.41903e-37	ENSG00000083444.17_PLOD1	up	YES
732.987	0.819285	0.0633192	12.939	2.71284e-38	6.88566e-37	ENSG00000144746.7_ARL6IP5	up	YES
583.837	0.780913	0.0603661	12.9363	2.80913e-38	7.11464e-37	ENSG00000162695.12_SLC30A7	up	YES
57.0283	3.3819	0.261492	12.9331	2.9278e-38	7.39918e-37	ENSG00000172137.19_CALB2	up	YES
699.002	0.818354	0.0633515	12.9177	3.57767e-38	9.02204e-37	ENSG00000214046.9_SMIM7	up	YES
1383.55	0.565089	0.0437932	12.9036	4.29688e-38	1.08124e-36	ENSG00000127463.15_EMC1	up	YES
260.176	1.14679	0.089174	12.8602	7.53989e-38	1.89322e-36	ENSG00000153029.16_MR1	up	YES
1415.59	0.552912	0.0430399	12.8465	9.00084e-38	2.25522e-36	ENSG00000185000.12_DGAT1	up	YES
887.04	0.744324	0.0579484	12.8446	9.22327e-38	2.30601e-36	ENSG00000189043.10_NDUFA4	up	YES
4974.56	0.340462	0.0265152	12.8403	9.7515e-38	2.43288e-36	ENSG00000178719.17_GRINA	up	YES
664.206	0.720855	0.056192	12.8284	1.13652e-37	2.82944e-36	ENSG00000171928.14_TVP23B	up	YES
1269.32	0.578715	0.0451573	12.8155	1.3421e-37	3.33417e-36	ENSG00000177830.18_CHID1	up	YES
1252.14	0.570107	0.0445326	12.802	1.59769e-37	3.96071e-36	ENSG00000166471.11_TMEM41B	up	YES
633.769	0.736065	0.0575154	12.7977	1.68866e-37	4.17738e-36	ENSG00000119523.10_ALG2	up	YES
880.996	0.679716	0.0531814	12.7811	2.09148e-37	5.16296e-36	ENSG00000105518.14_TMEM205	up	YES
735.953	0.718772	0.0563161	12.7632	2.63206e-37	6.48374e-36	ENSG00000164294.14_GPX8	up	YES
701.656	0.759346	0.0595003	12.7621	2.67068e-37	6.56505e-36	ENSG00000159322.18_ADPGK	up	YES
7464.67	0.346058	0.0271184	12.761	2.70592e-37	6.63773e-36	ENSG00000006327.14_TNFRSF12A	up	YES
589.467	0.764295	0.060032	12.7315	3.95329e-37	9.67728e-36	ENSG00000174851.16_YIF1A	up	YES
1553.25	0.51084	0.0401499	12.7233	4.38928e-37	1.07221e-35	ENSG00000085719.13_CPNE3	up	YES
3096.98	0.394009	0.0310116	12.7052	5.53223e-37	1.3486e-35	ENSG00000152558.15_TMEM123	up	YES
964.253	0.624047	0.0491659	12.6927	6.49182e-37	1.57923e-35	ENSG00000136816.16_TOR1B	up	YES
1301.21	0.556939	0.0439115	12.6832	7.32553e-37	1.77834e-35	ENSG00000177628.16_GBA	up	YES
1582.87	0.503351	0.0397043	12.6775	7.87985e-37	1.90895e-35	ENSG00000110660.15_SLC35F2	up	YES
595.411	0.754016	0.0595515	12.6616	9.65159e-37	2.33333e-35	ENSG00000113621.15_TXNDC15	up	YES
2182.28	0.466908	0.036952	12.6355	1.34466e-36	3.24409e-35	ENSG00000089248.7_ERP29	up	YES
13445.4	-0.37958	0.0300597	-12.6276	1.48837e-36	3.58341e-35	ENSG00000100345.22_MYH9	down	YES
1750.13	-0.498636	0.0395964	-12.593	2.30835e-36	5.5462e-35	ENSG00000126001.16_CEP250	down	YES
1248.19	0.592673	0.0471187	12.5783	2.77959e-36	6.66475e-35	ENSG00000109180.15_OCIAD1	up	YES
1995.17	0.45491	0.0362386	12.5532	3.81803e-36	9.13594e-35	ENSG00000197324.9_LRP10	up	YES
3900.69	0.387579	0.0310237	12.493	8.1537e-36	1.94707e-34	ENSG00000148358.20_GPR107	up	YES
2976.23	0.396981	0.0318208	12.4755	1.01529e-35	2.41952e-34	ENSG00000169692.13_AGPAT2	up	YES
1347.99	0.527475	0.0423248	12.4626	1.19467e-35	2.84122e-34	ENSG00000116685.16_KIAA2013	up	YES
2765.8	0.39905	0.0320814	12.4387	1.61101e-35	3.82361e-34	ENSG00000161638.11_ITGA5	up	YES
1224.72	0.553905	0.0446237	12.4128	2.22756e-35	5.27626e-34	ENSG00000170876.8_TMEM43	up	YES
19604.1	0.291577	0.0234916	12.412	2.25083e-35	5.32061e-34	ENSG00000198034.11_RPS4X	up	YES
1657.44	-0.486044	0.0393457	-12.3532	4.68285e-35	1.10472e-33	ENSG00000060237.19_WNK1	down	YES
397.689	0.919908	0.0744707	12.3526	4.71497e-35	1.11006e-33	ENSG00000184277.13_TM2D3	up	YES
986.014	0.610942	0.0494788	12.3476	5.02163e-35	1.17988e-33	ENSG00000221988.13_PPT2	up	YES
553.684	0.76042	0.0616316	12.3381	5.64393e-35	1.32344e-33	ENSG00000107789.16_MINPP1	up	YES
4398.89	-0.371894	0.0301552	-12.3327	6.04262e-35	1.41409e-33	ENSG00000106244.13_PDAP1	down	YES
851.917	0.725418	0.058901	12.3159	7.43949e-35	1.73752e-33	ENSG00000146842.17_TMEM209	up	YES
1814.82	0.483906	0.0392997	12.3132	7.69056e-35	1.79257e-33	ENSG00000166881.10_NEMP1	up	YES
3280.78	-0.377801	0.0307085	-12.3028	8.74559e-35	2.03444e-33	ENSG00000175592.9_FOSL1	down	YES
836.127	0.638996	0.0520115	12.2857	1.0816e-34	2.51106e-33	ENSG00000115457.10_IGFBP2	up	YES
447.165	0.845214	0.0691016	12.2315	2.11054e-34	4.89019e-33	ENSG00000117479.15_SLC19A2	up	YES
476.801	0.798146	0.0653581	12.2119	2.68577e-34	6.21071e-33	ENSG00000169490.17_TM2D2	up	YES
2702.1	0.411	0.0337453	12.1795	3.99853e-34	9.22817e-33	ENSG00000141756.19_FKBP10	up	YES
1352.57	0.509161	0.0418144	12.1767	4.13682e-34	9.52852e-33	ENSG00000159461.15_AMFR	up	YES
2664.61	-0.467574	0.0384216	-12.1696	4.51455e-34	1.03781e-32	ENSG00000196367.14_TRRAP	down	YES
1482.44	0.486461	0.040033	12.1515	5.63305e-34	1.2924e-32	ENSG00000170522.10_ELOVL6	up	YES
1096.64	0.561838	0.0463248	12.1282	7.48425e-34	1.71376e-32	ENSG00000141458.13_NPC1	up	YES
746.035	0.651541	0.0537557	12.1204	8.23661e-34	1.88235e-32	ENSG00000164081.13_TEX264	up	YES
568.634	0.744764	0.0614953	12.1109	9.24624e-34	2.10897e-32	ENSG00000105135.16_ILVBL	up	YES
548.303	0.74992	0.061967	12.1019	1.03165e-33	2.34851e-32	ENSG00000177674.16_AGTRAP	up	YES
13432.9	0.369497	0.0305392	12.0991	1.0674e-33	2.42518e-32	ENSG00000142192.21_APP	up	YES
2128.24	0.427665	0.0353833	12.0866	1.24279e-33	2.81819e-32	ENSG00000136731.13_UGGT1	up	YES
605.686	0.707677	0.0585832	12.0799	1.34962e-33	3.05453e-32	ENSG00000140284.11_SLC27A2	up	YES
6852.35	0.296642	0.0245589	12.0788	1.3666e-33	3.08698e-32	ENSG00000182718.18_ANXA2	up	YES
3462.97	-0.356267	0.0294988	-12.0774	1.39101e-33	3.13608e-32	ENSG00000070814.22_TCOF1	down	YES
1229.44	0.534928	0.0443422	12.0636	1.64367e-33	3.69858e-32	ENSG00000128463.13_EMC4	up	YES
2736.88	0.477618	0.0395957	12.0624	1.66911e-33	3.74861e-32	ENSG00000106153.13_CHCHD2	up	YES
1102.14	0.554243	0.0459587	12.0596	1.72648e-33	3.87003e-32	ENSG00000168476.12_REEP4	up	YES
444.525	0.829796	0.0688339	12.055	1.82441e-33	4.08173e-32	ENSG00000072849.11_DERL2	up	YES
3364.65	0.379699	0.0315564	12.0324	2.40183e-33	5.36332e-32	ENSG00000166340.18_TPP1	up	YES
1071.86	-0.590852	0.0491481	-12.0219	2.72747e-33	6.07888e-32	ENSG00000064393.16_HIPK2	down	YES
1204.48	0.547578	0.0455935	12.01	3.14892e-33	7.00485e-32	ENSG00000106609.16_TMEM248	up	YES
419.869	0.835517	0.0696845	11.99	4.00878e-33	8.9007e-32	ENSG00000026103.22_FAS	up	YES
3137.36	-0.41572	0.0347052	-11.9786	4.60065e-33	1.01955e-31	ENSG00000125107.19_CNOT1	down	YES
841.026	0.612348	0.0511297	11.9764	4.72608e-33	1.04537e-31	ENSG00000100219.16_XBP1	up	YES
730.096	0.646949	0.054039	11.9719	4.98842e-33	1.10131e-31	ENSG00000121064.13_SCPEP1	up	YES
525.429	0.775045	0.064765	11.967	5.2886e-33	1.16538e-31	ENSG00000213625.9_LEPROT	up	YES
832.924	-0.62967	0.0526243	-11.9654	5.39471e-33	1.18653e-31	ENSG00000166833.22_NAV2	down	YES
2753.81	-0.420442	0.0351495	-11.9615	5.65054e-33	1.24047e-31	ENSG00000134324.12_LPIN1	down	YES
7786.86	0.37189	0.031119	11.9506	6.44743e-33	1.41276e-31	ENSG00000198755.11_RPL10A	up	YES
2602.34	0.401723	0.0336297	11.9455	6.85458e-33	1.49917e-31	ENSG00000105329.11_TGFB1	up	YES
6086.94	0.46369	0.0388531	11.9344	7.82848e-33	1.70897e-31	ENSG00000131143.10_COX4I1	up	YES
467.358	0.83865	0.0702809	11.9328	7.98114e-33	1.73906e-31	ENSG00000171135.15_JAGN1	up	YES
3753.11	0.394457	0.0330715	11.9274	8.52012e-33	1.85305e-31	ENSG00000132182.12_NUP210	up	YES
1517.38	0.473599	0.0397535	11.9134	1.00768e-32	2.18755e-31	ENSG00000049656.14_CLPTM1L	up	YES
3965.08	0.379175	0.0318331	11.9114	1.0328e-32	2.23793e-31	ENSG00000075415.15_SLC25A3	up	YES
3531.94	0.356621	0.0299901	11.8913	1.31396e-32	2.84189e-31	ENSG00000198171.13_DDRGK1	up	YES
968.595	0.6029	0.0507431	11.8814	1.47807e-32	3.19094e-31	ENSG00000213699.9_SLC35F6	up	YES
429.972	0.824649	0.0694312	11.8772	1.55467e-32	3.35013e-31	ENSG00000170385.10_SLC30A1	up	YES
1110.02	0.576909	0.0485985	11.8709	1.67588e-32	3.60469e-31	ENSG00000197006.14_METTL9	up	YES
946.114	0.568301	0.0478817	11.8689	1.7179e-32	3.68828e-31	ENSG00000070214.16_SLC44A1	up	YES
407.585	0.887095	0.0747813	11.8625	1.8531e-32	3.97127e-31	ENSG00000134882.16_UBAC2	up	YES
1130.2	0.531488	0.0448108	11.8607	1.89342e-32	4.05027e-31	ENSG00000168282.6_MGAT2	up	YES
1011.47	0.585179	0.0493461	11.8587	1.94018e-32	4.14271e-31	ENSG00000117899.11_MESD	up	YES
1010.25	0.584253	0.0494296	11.8199	3.08053e-32	6.56563e-31	ENSG00000177410.13_ZFAS1	up	YES
719.103	0.670378	0.0567253	11.818	3.15242e-32	6.70662e-31	ENSG00000141378.15_PTRH2	up	YES
1316.89	-0.520098	0.0440368	-11.8105	3.44304e-32	7.31162e-31	ENSG00000112159.12_MDN1	down	YES
3683.1	0.352373	0.0298561	11.8024	3.79517e-32	8.04479e-31	ENSG00000005022.6_SLC25A5	up	YES
4134.01	0.361191	0.0306318	11.7914	4.32408e-32	9.14938e-31	ENSG00000120889.13_TNFRSF10B	up	YES
23174.6	-0.315656	0.0267864	-11.7842	4.70856e-32	9.94492e-31	ENSG00000196924.19_FLNA	down	YES
3519.88	-0.350077	0.0298522	-11.727	9.27017e-32	1.95442e-30	ENSG00000126012.12_KDM5C	down	YES
1046.07	0.558085	0.0476886	11.7027	1.23464e-31	2.5983e-30	ENSG00000182158.15_CREB3L2	up	YES
444.001	0.807757	0.0690706	11.6947	1.35733e-31	2.85137e-30	ENSG00000091947.10_TMEM101	up	YES
1516.47	0.459954	0.0394227	11.6672	1.87437e-31	3.93048e-30	ENSG00000134243.12_SORT1	up	YES
1045.4	0.542646	0.0465385	11.6602	2.03656e-31	4.26293e-30	ENSG00000008283.16_CYB561	up	YES
790.591	0.714109	0.0612552	11.6579	2.0906e-31	4.36117e-30	ENSG00000123179.14_EBPL	up	YES
1086.5	0.535198	0.0459086	11.6579	2.09095e-31	4.36117e-30	ENSG00000151233.11_GXYLT1	up	YES
4542.81	0.324108	0.027808	11.6552	2.15846e-31	4.49398e-30	ENSG00000182899.17_RPL35A	up	YES
374.314	-0.868262	0.074569	-11.6437	2.4692e-31	5.13181e-30	ENSG00000154358.23_OBSCN	down	YES
1533.86	0.463073	0.0398253	11.6276	2.98327e-31	6.18923e-30	ENSG00000101346.14_POFUT1	up	YES
1752.4	0.480855	0.0413915	11.6172	3.36819e-31	6.97544e-30	ENSG00000033627.17_ATP6V0A1	up	YES
783.436	0.608875	0.0525484	11.5869	4.79936e-31	9.92179e-30	ENSG00000148154.10_UGCG	up	YES
974.632	0.579561	0.050034	11.5833	5.0052e-31	1.03291e-29	ENSG00000128973.13_CLN6	up	YES
3782.31	-0.344094	0.0297341	-11.5724	5.68902e-31	1.17196e-29	ENSG00000176619.13_LMNB2	down	YES
2132.01	-0.447475	0.0386826	-11.5679	5.99538e-31	1.2329e-29	ENSG00000143322.21_ABL2	down	YES
1270.19	0.510917	0.0441791	11.5647	6.22216e-31	1.27729e-29	ENSG00000118217.7_ATF6	up	YES
321.48	0.928111	0.0803399	11.5523	7.18665e-31	1.4727e-29	ENSG00000156171.15_DRAM2	up	YES
1621.07	0.459921	0.0398407	11.544	7.91576e-31	1.61927e-29	ENSG00000197930.13_ERO1A	up	YES
5431.55	0.319571	0.0276875	11.542	8.09821e-31	1.6537e-29	ENSG00000131504.17_DIAPH1	up	YES
2853.57	0.403073	0.0349245	11.5413	8.17159e-31	1.66578e-29	ENSG00000078808.19_SDF4	up	YES
1778.53	-0.495095	0.0429349	-11.5313	9.17693e-31	1.86747e-29	ENSG00000117724.13_CENPF	down	YES
2238.06	0.427241	0.0370703	11.5252	9.85381e-31	2.00173e-29	ENSG00000167123.19_CERCAM	up	YES
1367.2	0.478801	0.0415457	11.5247	9.90648e-31	2.00894e-29	ENSG00000169682.18_SPNS1	up	YES
491.09	0.745809	0.0648071	11.5081	1.20042e-30	2.43012e-29	ENSG00000114988.12_LMAN2L	up	YES
1285.89	0.495567	0.04315	11.4847	1.57404e-30	3.18098e-29	ENSG00000067182.8_TNFRSF1A	up	YES
751.602	0.621479	0.0542555	11.4547	2.2284e-30	4.48786e-29	ENSG00000029364.12_SLC39A9	up	YES
633.598	0.705247	0.0615685	11.4547	2.22813e-30	4.48786e-29	ENSG00000169359.16_SLC33A1	up	YES
3623.7	0.335895	0.0293499	11.4445	2.50447e-30	5.03519e-29	ENSG00000165661.17_QSOX2	up	YES
1898.82	0.418093	0.0365358	11.4434	2.53876e-30	5.09538e-29	ENSG00000147955.18_SIGMAR1	up	YES
7423.7	-0.274077	0.0239603	-11.4388	2.67659e-30	5.35364e-29	ENSG00000138668.19_HNRNPD	down	YES
442.886	0.788353	0.0689187	11.4389	2.67332e-30	5.35364e-29	ENSG00000172469.17_MANEA	up	YES
1233.29	0.501038	0.0438285	11.4318	2.90101e-30	5.79261e-29	ENSG00000164040.18_PGRMC2	up	YES
1608.41	0.441165	0.0385961	11.4303	2.95111e-30	5.88261e-29	ENSG00000088812.18_ATRN	up	YES
2297.87	0.39102	0.0342096	11.4301	2.95621e-30	5.88276e-29	ENSG00000239672.8_NME1	up	YES
1933.69	0.427251	0.0373886	11.4273	3.05436e-30	6.06775e-29	ENSG00000105726.17_ATP13A1	up	YES
562.616	0.710688	0.0623865	11.3917	4.59977e-30	9.12236e-29	ENSG00000129636.13_ITFG1	up	YES
1260.85	0.496737	0.0436469	11.3808	5.21094e-30	1.0317e-28	ENSG00000169919.17_GUSB	up	YES
471.406	0.779637	0.0685322	11.3762	5.49325e-30	1.08575e-28	ENSG00000176273.15_SLC35G1	up	YES
9111.33	0.290386	0.025537	11.3712	5.81832e-30	1.14806e-28	ENSG00000166441.13_RPL27A	up	YES
839.053	0.574519	0.0505933	11.3557	6.95203e-30	1.36946e-28	ENSG00000156162.16_DPY19L4	up	YES
994.923	0.633278	0.0557884	11.3514	7.29684e-30	1.43496e-28	ENSG00000144136.11_SLC20A1	up	YES
1232.8	0.502017	0.0442611	11.3422	8.11034e-30	1.59227e-28	ENSG00000117385.16_P3H1	up	YES
753.545	0.60567	0.0534267	11.3365	8.65695e-30	1.69673e-28	ENSG00000172269.20_DPAGT1	up	YES
1123.57	0.517739	0.0456894	11.3317	9.13874e-30	1.78817e-28	ENSG00000172292.15_CERS6	up	YES
37498.5	-0.213044	0.0188714	-11.2893	1.48279e-29	2.89652e-28	ENSG00000135486.19_HNRNPA1	down	YES
1059.44	0.528074	0.0467933	11.2852	1.55239e-29	3.02743e-28	ENSG00000153936.17_HS2ST1	up	YES
671.689	0.645114	0.0572221	11.2738	1.76672e-29	3.43967e-28	ENSG00000072682.20_P4HA2	up	YES
3685.88	-0.337358	0.0299295	-11.2718	1.80926e-29	3.51665e-28	ENSG00000148337.21_CIZ1	down	YES
817.796	0.67694	0.0600668	11.2698	1.85003e-29	3.58991e-28	ENSG00000182544.9_MFSD5	up	YES
553.845	0.692612	0.0614888	11.264	1.97523e-29	3.82651e-28	ENSG00000234745.13_HLA-B	up	YES
1157.9	0.494896	0.044066	11.2308	2.8787e-29	5.56754e-28	ENSG00000048392.12_RRM2B	up	YES
611.949	0.708963	0.0631666	11.2237	3.11912e-29	6.02259e-28	ENSG00000173653.8_RCE1	up	YES
15232.6	-0.359123	0.0320646	-11.2	4.07791e-29	7.86089e-28	ENSG00000065978.19_YBX1	down	YES
364.117	0.831108	0.0742316	11.1961	4.25906e-29	8.19658e-28	ENSG00000012174.12_MBTPS2	up	YES
490.761	0.736111	0.0658054	11.1862	4.7648e-29	9.15483e-28	ENSG00000153214.11_TMEM87B	up	YES
698.372	0.662611	0.0592396	11.1853	4.81423e-29	9.23464e-28	ENSG00000166130.15_IKBIP	up	YES
6557.97	0.276406	0.0247149	11.1838	4.8948e-29	9.37381e-28	ENSG00000125844.16_RRBP1	up	YES
555.803	0.726212	0.0649386	11.183	4.93644e-29	9.43813e-28	ENSG00000143162.9_CREG1	up	YES
639.432	0.731674	0.0656115	11.1516	7.0316e-29	1.3422e-27	ENSG00000205155.8_PSENEN	up	YES
431.606	0.797997	0.0716388	11.1392	8.08644e-29	1.54103e-27	ENSG00000179387.10_ELMOD2	up	YES
1006.4	0.542642	0.048768	11.127	9.2697e-29	1.76366e-27	ENSG00000162736.17_NCSTN	up	YES
525.551	0.731132	0.0657146	11.1259	9.38916e-29	1.78348e-27	ENSG00000138821.14_SLC39A8	up	YES
1538.62	0.449257	0.0404126	11.1168	1.03985e-28	1.97201e-27	ENSG00000119777.20_TMEM214	up	YES
1431.21	0.451497	0.0406177	11.1158	1.05161e-28	1.99109e-27	ENSG00000131389.18_SLC6A6	up	YES
310.959	0.918115	0.082652	11.1082	1.14446e-28	2.16338e-27	ENSG00000085871.9_MGST2	up	YES
1259.8	0.546863	0.0492435	11.1053	1.18234e-28	2.23139e-27	ENSG00000130193.8_THEM6	up	YES
840.522	0.574782	0.0517926	11.0978	1.28605e-28	2.4232e-27	ENSG00000064545.15_TMEM161A	up	YES
1517.87	0.444938	0.0401169	11.091	1.38655e-28	2.60837e-27	ENSG00000105699.17_LSR	up	YES
1878.14	0.473542	0.0427197	11.0848	1.48601e-28	2.79098e-27	ENSG00000145495.16_MARCHF6	up	YES
1663.25	0.424875	0.0383318	11.0842	1.49756e-28	2.80817e-27	ENSG00000130202.10_NECTIN2	up	YES
1648.18	0.43261	0.0391072	11.0622	1.91446e-28	3.58418e-27	ENSG00000138760.11_SCARB2	up	YES
890.351	0.579916	0.0524251	11.0618	1.92198e-28	3.5925e-27	ENSG00000080815.19_PSEN1	up	YES
429.212	0.760868	0.0689309	11.0381	2.50183e-28	4.66888e-27	ENSG00000204520.14_MICA	up	YES
1228.89	0.48458	0.0439102	11.0357	2.57045e-28	4.78931e-27	ENSG00000165672.7_PRDX3	up	YES
1482.61	0.505588	0.0458205	11.0341	2.61705e-28	4.86837e-27	ENSG00000138074.15_SLC5A6	up	YES
596.511	0.678418	0.0614903	11.0329	2.65117e-28	4.92403e-27	ENSG00000121316.11_PLBD1	up	YES
2010.89	-0.398187	0.0361112	-11.0267	2.8408e-28	5.26787e-27	ENSG00000077097.16_TOP2B	down	YES
1596.47	0.439587	0.0399481	11.0039	3.65774e-28	6.77203e-27	ENSG00000149328.15_GLB1L2	up	YES
504.785	0.718595	0.0653078	11.0032	3.68823e-28	6.81768e-27	ENSG00000109586.12_GALNT7	up	YES
883.063	0.55218	0.0501987	10.9999	3.82599e-28	7.06118e-27	ENSG00000113441.16_LNPEP	up	YES
66.9046	2.0691	0.188648	10.9681	5.44335e-28	1.00303e-26	ENSG00000123496.8_IL13RA2	up	YES
2063.64	0.398217	0.0363351	10.9596	5.97824e-28	1.09986e-26	ENSG00000255717.7_SNHG1	up	YES
2814.52	0.352696	0.0322141	10.9485	6.75444e-28	1.24072e-26	ENSG00000162430.18_SELENON	up	YES
1205.89	0.520511	0.0475477	10.9471	6.8583e-28	1.25782e-26	ENSG00000110344.10_UBE4A	up	YES
822.51	0.561209	0.0513199	10.9355	7.79701e-28	1.42774e-26	ENSG00000198818.10_SFT2D1	up	YES
1948.82	0.392868	0.0359319	10.9337	7.95598e-28	1.45458e-26	ENSG00000072310.18_SREBF1	up	YES
373.893	0.798611	0.0730665	10.9299	8.29245e-28	1.51137e-26	ENSG00000152683.14_SLC30A6	up	YES
458.01	0.735883	0.0673272	10.9299	8.28955e-28	1.51137e-26	ENSG00000243646.10_IL10RB	up	YES
1126.62	0.491127	0.0449504	10.926	8.66133e-28	1.57615e-26	ENSG00000006007.12_GDE1	up	YES
281.876	0.94223	0.0864166	10.9033	1.11099e-27	2.01859e-26	ENSG00000001561.7_ENPP4	up	YES
886.001	0.60765	0.0557363	10.9022	1.12451e-27	2.03999e-26	ENSG00000143198.13_MGST3	up	YES
1740.33	0.414439	0.038045	10.8934	1.23953e-27	2.24517e-26	ENSG00000100258.18_LMF2	up	YES
572.828	0.660223	0.0606366	10.8882	1.31237e-27	2.37343e-26	ENSG00000125257.16_ABCC4	up	YES
742.41	0.61347	0.0564111	10.875	1.51656e-27	2.73847e-26	ENSG00000119820.11_YIPF4	up	YES
1637.54	0.419269	0.0385743	10.8691	1.6174e-27	2.91605e-26	ENSG00000075213.11_SEMA3A	up	YES
576.454	0.682126	0.0627879	10.864	1.71124e-27	3.08049e-26	ENSG00000113811.11_SELENOK	up	YES
2531.55	-0.36854	0.0340293	-10.8301	2.47973e-27	4.45704e-26	ENSG00000158545.16_ZC3H18	down	YES
523.49	0.714101	0.0659587	10.8265	2.57861e-27	4.62765e-26	ENSG00000010270.14_STARD3NL	up	YES
1409.66	-0.471963	0.0436337	-10.8165	2.87569e-27	5.1529e-26	ENSG00000196914.9_ARHGEF12	down	YES
828.931	0.576828	0.0533924	10.8036	3.31119e-27	5.9242e-26	ENSG00000105677.12_TMEM147	up	YES
259.144	0.970751	0.0899922	10.7871	3.96252e-27	7.07869e-26	ENSG00000138613.14_APH1B	up	YES
782.58	0.582169	0.0540001	10.7809	4.2383e-27	7.5598e-26	ENSG00000156875.14_MFSD14A	up	YES
1980.09	0.389121	0.0361127	10.7752	4.50792e-27	8.02848e-26	ENSG00000170275.15_CRTAP	up	YES
1099.08	0.506618	0.0470567	10.7661	4.97526e-27	8.84734e-26	ENSG00000173486.14_FKBP2	up	YES
664.648	0.599984	0.0557441	10.7632	5.13673e-27	9.12062e-26	ENSG00000094975.14_SUCO	up	YES
2551.78	-0.369962	0.0344031	-10.7538	5.68973e-27	1.00872e-25	ENSG00000179295.18_PTPN11	down	YES
1604.09	0.466428	0.043375	10.7534	5.71272e-27	1.01126e-25	ENSG00000117362.13_APH1A	up	YES
740.796	0.579127	0.053901	10.7443	6.30543e-27	1.1145e-25	ENSG00000182240.16_BACE2	up	YES
1129.88	0.492617	0.0459096	10.7302	7.34608e-27	1.29648e-25	ENSG00000130714.19_POMT1	up	YES
6591.67	0.297609	0.0277562	10.7222	8.00329e-27	1.41034e-25	ENSG00000122026.11_RPL21	up	YES
499.366	0.710353	0.0662561	10.7213	8.08358e-27	1.42235e-25	ENSG00000145817.17_YIPF5	up	YES
750.521	0.646509	0.0603209	10.7178	8.3944e-27	1.47482e-25	ENSG00000163463.13_KRTCAP2	up	YES
556.06	-0.687059	0.06417	-10.7069	9.45167e-27	1.65808e-25	ENSG00000072840.13_EVC	down	YES
756.392	0.592898	0.0553793	10.7061	9.52531e-27	1.6685e-25	ENSG00000165282.14_PIGO	up	YES
1045.76	0.517419	0.048436	10.6825	1.22873e-26	2.14908e-25	ENSG00000173638.19_SLC19A1	up	YES
1820.79	0.402984	0.0377411	10.6776	1.29623e-26	2.26375e-25	ENSG00000104774.13_MAN2B1	up	YES
3268.3	-0.320894	0.0300756	-10.6696	1.4126e-26	2.46332e-25	ENSG00000129250.12_KIF1C	down	YES
108.209	1.50243	0.140826	10.6686	1.42699e-26	2.48471e-25	ENSG00000137962.13_ARHGAP29	up	YES
2783.12	-0.3397	0.0318475	-10.6665	1.46094e-26	2.54004e-25	ENSG00000009954.11_BAZ1B	down	YES
612.178	0.624492	0.0586217	10.6529	1.68995e-26	2.93385e-25	ENSG00000147650.12_LRP12	up	YES
5364.8	0.277248	0.0260409	10.6466	1.80765e-26	3.13352e-25	ENSG00000104408.11_EIF3E	up	YES
463.729	0.752661	0.0707035	10.6453	1.83367e-26	3.17393e-25	ENSG00000134255.14_CEPT1	up	YES
1733.68	0.459058	0.0431374	10.6418	1.90496e-26	3.29245e-25	ENSG00000116237.16_ICMT	up	YES
599.497	0.633379	0.0595504	10.636	2.02632e-26	3.49705e-25	ENSG00000163069.13_SGCB	up	YES
1767.5	0.437214	0.0411399	10.6275	2.21993e-26	3.82554e-25	ENSG00000123146.20_ADGRE5	up	YES
578.369	0.652811	0.061438	10.6255	2.26723e-26	3.9013e-25	ENSG00000102100.16_SLC35A2	up	YES
1209.36	0.574972	0.0542163	10.6051	2.82035e-26	4.84594e-25	ENSG00000129255.16_MPDU1	up	YES
1573.96	-0.428477	0.0404169	-10.6014	2.93439e-26	5.03451e-25	ENSG00000127328.22_RAB3IP	down	YES
1599.36	-0.443235	0.0418371	-10.5943	3.16732e-26	5.42618e-25	ENSG00000166326.7_TRIM44	down	YES
888.819	0.560792	0.0529415	10.5927	3.22227e-26	5.51225e-25	ENSG00000042445.14_RETSAT	up	YES
3759.23	0.304868	0.0288257	10.5763	3.83909e-26	6.55784e-25	ENSG00000152291.14_TGOLN2	up	YES
2896.33	0.334754	0.0316701	10.57	4.1037e-26	6.99961e-25	ENSG00000033100.16_CHPF2	up	YES
363.339	0.788725	0.0746682	10.5631	4.41999e-26	7.52813e-25	ENSG00000087253.13_LPCAT2	up	YES
1296.55	0.460663	0.043628	10.5589	4.62069e-26	7.85853e-25	ENSG00000153989.8_NUS1	up	YES
891.088	0.521109	0.049396	10.5496	5.10103e-26	8.66287e-25	ENSG00000205060.11_SLC35B4	up	YES
526.103	0.682669	0.0647149	10.5489	5.14081e-26	8.71777e-25	ENSG00000204070.10_SYS1	up	YES
309.447	0.911398	0.0865433	10.5311	6.20918e-26	1.05143e-24	ENSG00000128590.5_DNAJB9	up	YES
987.134	0.503614	0.0478659	10.5214	6.88789e-26	1.16467e-24	ENSG00000171302.17_CANT1	up	YES
375.888	0.798257	0.0760917	10.4907	9.5305e-26	1.60918e-24	ENSG00000103811.18_CTSH	up	YES
390.711	0.763201	0.0730161	10.4525	1.42711e-25	2.40613e-24	ENSG00000177054.14_ZDHHC13	up	YES
1948.85	-0.402229	0.0384846	-10.4517	1.43937e-25	2.42332e-24	ENSG00000101421.4_CHMP4B	down	YES
1365.58	0.503071	0.0481909	10.4391	1.64288e-25	2.76198e-24	ENSG00000151176.8_PLBD2	up	YES
483.067	0.691273	0.066223	10.4386	1.65293e-25	2.77489e-24	ENSG00000197563.11_PIGN	up	YES
821.658	0.540451	0.0518124	10.4309	1.79163e-25	3.00343e-24	ENSG00000162769.13_FLVCR1	up	YES
402.213	0.731654	0.0701876	10.4243	1.9216e-25	3.21669e-24	ENSG00000125037.12_EMC3	up	YES
840.736	0.554605	0.053233	10.4184	2.04266e-25	3.41445e-24	ENSG00000143324.14_XPR1	up	YES
343.859	0.790342	0.0759465	10.4066	2.31433e-25	3.86305e-24	ENSG00000037749.13_MFAP3	up	YES
719.574	0.571446	0.0549283	10.4035	2.38989e-25	3.98349e-24	ENSG00000119655.11_NPC2	up	YES
3442.87	-0.380558	0.0366092	-10.3952	2.60871e-25	4.34204e-24	ENSG00000075785.14_RAB7A	down	YES
42.5068	2.80682	0.27025	10.386	2.87078e-25	4.77145e-24	ENSG00000181634.8_TNFSF15	up	YES
552.973	0.637975	0.0614463	10.3826	2.97421e-25	4.93634e-24	ENSG00000149809.17_TM7SF2	up	YES
464.215	0.724125	0.0697572	10.3806	3.03727e-25	5.03386e-24	ENSG00000174684.7_B4GAT1	up	YES
1445.23	0.436226	0.0420449	10.3752	3.2138e-25	5.3189e-24	ENSG00000071462.12_BUD23	up	YES
358.56	0.800962	0.0772612	10.3669	3.50574e-25	5.79389e-24	ENSG00000146416.19_AIG1	up	YES
1223.58	0.445234	0.0429572	10.3646	3.59251e-25	5.9289e-24	ENSG00000134352.20_IL6ST	up	YES
392.662	0.741871	0.0715899	10.3628	3.66103e-25	6.03347e-24	ENSG00000144455.14_SUMF1	up	YES
1383.14	0.440106	0.0424799	10.3603	3.75588e-25	6.1811e-24	ENSG00000144567.11_RETREG2	up	YES
1818.74	-0.434709	0.042012	-10.3472	4.30682e-25	7.07781e-24	ENSG00000198408.14_OGA	down	YES
1503.13	0.41856	0.0405026	10.3342	4.9376e-25	8.10306e-24	ENSG00000174939.11_ASPHD1	up	YES
2623.93	0.373235	0.0361861	10.3143	6.07237e-25	9.95138e-24	ENSG00000177119.17_ANO6	up	YES
2284.76	0.364908	0.0353907	10.3108	6.29423e-25	1.03005e-23	ENSG00000073008.15_PVR	up	YES
2491.7	0.378667	0.0367438	10.3056	6.64739e-25	1.08633e-23	ENSG00000176915.15_ANKLE2	up	YES
766.474	0.546632	0.0530443	10.3052	6.67507e-25	1.08933e-23	ENSG00000147383.11_NSDHL	up	YES
780.195	0.554151	0.0537928	10.3016	6.93028e-25	1.1294e-23	ENSG00000168389.18_MFSD2A	up	YES
567.618	0.635637	0.0617553	10.2928	7.59151e-25	1.23544e-23	ENSG00000068912.14_ERLEC1	up	YES
4130.4	0.327562	0.0318372	10.2887	7.92708e-25	1.28826e-23	ENSG00000152234.16_ATP5F1A	up	YES
538.054	0.657075	0.0638665	10.2883	7.95996e-25	1.29181e-23	ENSG00000189050.16_RNFT1	up	YES
1602.16	0.412604	0.0402103	10.2611	1.05458e-24	1.70909e-23	ENSG00000114650.20_SCAP	up	YES
1124.92	0.504349	0.0492026	10.2505	1.17786e-24	1.90624e-23	ENSG00000151366.13_NDUFC2	up	YES
6039.64	-0.282267	0.0275574	-10.2429	1.27388e-24	2.05879e-23	ENSG00000170144.21_HNRNPA3	down	YES
2093.86	0.381844	0.0372841	10.2414	1.29287e-24	2.0866e-23	ENSG00000174136.13_RGMB	up	YES
598.286	0.62953	0.0616557	10.2104	1.78121e-24	2.87079e-23	ENSG00000108784.10_NAGLU	up	YES
46091.1	-0.246842	0.0241964	-10.2016	1.95054e-24	3.13937e-23	ENSG00000167658.16_EEF2	down	YES
1101.2	0.462864	0.0453942	10.1965	2.05448e-24	3.30212e-23	ENSG00000093010.15_COMT	up	YES
1045.12	0.471502	0.0462591	10.1926	2.139e-24	3.43325e-23	ENSG00000116005.12_PCYOX1	up	YES
684.55	0.565491	0.0554912	10.1906	2.18316e-24	3.49934e-23	ENSG00000198951.12_NAGA	up	YES
731.528	0.64315	0.0631197	10.1894	2.21201e-24	3.54073e-23	ENSG00000128699.14_ORMDL1	up	YES
755.523	0.546726	0.0536593	10.1888	2.22401e-24	3.55508e-23	ENSG00000182985.18_CADM1	up	YES
798.144	0.528878	0.051922	10.186	2.28937e-24	3.65456e-23	ENSG00000006042.12_TMEM98	up	YES
678.52	0.566596	0.0556346	10.1842	2.33166e-24	3.71699e-23	ENSG00000163162.9_RNF149	up	YES
1395.49	0.42755	0.0419937	10.1813	2.40322e-24	3.82587e-23	ENSG00000103855.18_CD276	up	YES
1146.55	0.450366	0.0442608	10.1753	2.55706e-24	4.06524e-23	ENSG00000079332.15_SAR1A	up	YES
362.125	0.758926	0.0746706	10.1636	2.8811e-24	4.57418e-23	ENSG00000170340.11_B3GNT2	up	YES
997.44	0.479893	0.0472255	10.1617	2.93802e-24	4.65824e-23	ENSG00000140497.16_SCAMP2	up	YES
583.654	0.6404	0.0630976	10.1494	3.33509e-24	5.28063e-23	ENSG00000152749.8_GPR180	up	YES
194.249	1.07839	0.10635	10.1399	3.67323e-24	5.80816e-23	ENSG00000121542.12_SEC22A	up	YES
959.543	0.504943	0.0498086	10.1377	3.75962e-24	5.93675e-23	ENSG00000109501.15_WFS1	up	YES
1022.73	0.480563	0.0474176	10.1347	3.87525e-24	6.11109e-23	ENSG00000086062.13_B4GALT1	up	YES
870.665	0.541365	0.0534801	10.1228	4.37928e-24	6.89663e-23	ENSG00000217555.13_CKLF	up	YES
1613.33	0.408473	0.040369	10.1185	4.57486e-24	7.19496e-23	ENSG00000101187.16_SLCO4A1	up	YES
494.078	0.657281	0.0650398	10.1058	5.20554e-24	8.17585e-23	ENSG00000081177.18_EXD2	up	YES
1042.56	0.465222	0.0460684	10.0985	5.60828e-24	8.79658e-23	ENSG00000184992.13_BRI3BP	up	YES
1524.64	0.417187	0.0413507	10.089	6.17947e-24	9.67951e-23	ENSG00000227500.10_SCAMP4	up	YES
41416.3	0.202882	0.0201132	10.087	6.3081e-24	9.86779e-23	ENSG00000142541.18_RPL13A	up	YES
1532.17	0.399196	0.0396113	10.0778	6.92279e-24	1.08149e-22	ENSG00000166734.20_GOLM2	up	YES
1202.81	-0.446481	0.0443183	-10.0744	7.16791e-24	1.11829e-22	ENSG00000083168.11_KAT6A	down	YES
3867.06	-0.302708	0.0300563	-10.0714	7.39402e-24	1.15203e-22	ENSG00000085733.16_CTTN	down	YES
880.035	-0.504711	0.0501341	-10.0672	7.71201e-24	1.19998e-22	ENSG00000073792.16_IGF2BP2	down	YES
981.287	0.472645	0.0470089	10.0544	8.78678e-24	1.36539e-22	ENSG00000116521.11_SCAMP3	up	YES
1159.6	-0.448711	0.0446312	-10.0537	8.84425e-24	1.3725e-22	ENSG00000120733.14_KDM3B	down	YES
644.66	0.570021	0.056714	10.0508	9.11302e-24	1.41234e-22	ENSG00000134049.6_IER3IP1	up	YES
357.413	0.756564	0.0752758	10.0506	9.13496e-24	1.41387e-22	ENSG00000181744.9_DIPK2A	up	YES
1440.18	-0.413499	0.0411436	-10.0501	9.17352e-24	1.41796e-22	ENSG00000103549.22_RNF40	down	YES
146.519	1.30229	0.129647	10.0449	9.67944e-24	1.49418e-22	ENSG00000151665.13_PIGF	up	YES
681.368	0.566383	0.0564011	10.0421	9.95708e-24	1.53502e-22	ENSG00000213853.10_EMP2	up	YES
124.633	1.36495	0.135927	10.0418	9.98566e-24	1.5374e-22	ENSG00000173349.6_SFT2D3	up	YES
6039.13	0.290811	0.0289695	10.0385	1.03199e-23	1.58677e-22	ENSG00000178952.11_TUFM	up	YES
2942.36	0.323233	0.0322265	10.03	1.12472e-23	1.72708e-22	ENSG00000032444.17_PNPLA6	up	YES
1081.86	0.462965	0.0462493	10.0102	1.37486e-23	2.10842e-22	ENSG00000182379.10_NXPH4	up	YES
621.743	0.597144	0.0596625	10.0087	1.39575e-23	2.13766e-22	ENSG00000181704.12_YIPF6	up	YES
1160.35	0.436857	0.0436577	10.0064	1.42827e-23	2.1846e-22	ENSG00000143641.10_GALNT2	up	YES
1079.6	0.476821	0.0476611	10.0044	1.4576e-23	2.22655e-22	ENSG00000126062.4_TMEM115	up	YES
7360.44	0.289354	0.0289258	10.0033	1.47388e-23	2.24848e-22	ENSG00000196262.15_PPIA	up	YES
1122.6	0.460175	0.0460043	10.0029	1.48026e-23	2.25528e-22	ENSG00000101084.18_RAB5IF	up	YES
829.7	-0.514528	0.0515587	-9.97946	1.87482e-23	2.85271e-22	ENSG00000180357.9_ZNF609	down	YES
425.792	0.78826	0.0790011	9.97784	1.90575e-23	2.896e-22	ENSG00000102805.16_CLN5	up	YES
1789.21	0.408404	0.0409549	9.97205	2.02015e-23	3.06585e-22	ENSG00000091136.15_LAMB1	up	YES
2476.12	0.369455	0.0370781	9.96422	2.18573e-23	3.31285e-22	ENSG00000159377.11_PSMB4	up	YES
1903.13	0.370096	0.0371529	9.96142	2.24821e-23	3.40315e-22	ENSG00000257727.6_CNPY2	up	YES
545.421	0.632712	0.0635319	9.95896	2.3045e-23	3.48385e-22	ENSG00000143315.8_PIGM	up	YES
296.416	0.832718	0.0836436	9.95556	2.38486e-23	3.60067e-22	ENSG00000142188.17_TMEM50B	up	YES
1118.47	-0.466676	0.0468896	-9.95264	2.45569e-23	3.70284e-22	ENSG00000185963.14_BICD2	down	YES
1541.92	0.396829	0.0398726	9.95242	2.46133e-23	3.70656e-22	ENSG00000141736.14_ERBB2	up	YES
747.006	-0.566483	0.0569201	-9.95224	2.46576e-23	3.70847e-22	ENSG00000049618.24_ARID1B	down	YES
392.663	0.706936	0.0710403	9.9512	2.49168e-23	3.74264e-22	ENSG00000115170.16_ACVR1	up	YES
637.235	0.58181	0.0584674	9.95102	2.49616e-23	3.74457e-22	ENSG00000120942.14_UBIAD1	up	YES
1972.47	0.375374	0.0377448	9.94505	2.6505e-23	3.97099e-22	ENSG00000046604.14_DSG2	up	YES
1145.09	-0.45454	0.0457577	-9.93362	2.97271e-23	4.44804e-22	ENSG00000198826.11_ARHGAP11A	down	YES
5501.84	0.294708	0.0296957	9.92425	3.26558e-23	4.88002e-22	ENSG00000164889.15_SLC4A2	up	YES
822.203	0.501726	0.0505826	9.91894	3.44383e-23	5.13983e-22	ENSG00000147123.11_NDUFB11	up	YES
891.312	0.518532	0.0522992	9.91472	3.59269e-23	5.35516e-22	ENSG00000138448.12_ITGAV	up	YES
870.009	0.546945	0.0551981	9.90876	3.81338e-23	5.67689e-22	ENSG00000141552.18_ANAPC11	up	YES
33.8434	4.42033	0.446117	9.90846	3.82484e-23	5.68672e-22	ENSG00000198626.17_RYR2	up	YES
434.636	0.67569	0.0682261	9.90369	4.01195e-23	5.95733e-22	ENSG00000084444.14_FAM234B	up	YES
5033.16	-0.270438	0.02731	-9.90254	4.05825e-23	6.01845e-22	ENSG00000270647.6_TAF15	down	YES
779.014	0.534067	0.0539356	9.90193	4.08335e-23	6.04801e-22	ENSG00000133216.17_EPHB2	up	YES
702.126	0.546368	0.0551842	9.9008	4.12947e-23	6.10859e-22	ENSG00000141699.11_RETREG3	up	YES
721.959	0.539114	0.0544595	9.89936	4.18959e-23	6.18969e-22	ENSG00000137207.12_YIPF3	up	YES
1318.6	0.414249	0.0418519	9.89797	4.24801e-23	6.26809e-22	ENSG00000141934.10_PLPP2	up	YES
1383.92	0.424307	0.0428786	9.89554	4.35268e-23	6.41444e-22	ENSG00000100902.11_PSMA6	up	YES
778.89	0.562327	0.0569033	9.88215	4.97543e-23	7.32296e-22	ENSG00000157800.18_SLC37A3	up	YES
3788.83	-0.29343	0.0297431	-9.86546	5.87666e-23	8.63854e-22	ENSG00000276043.5_UHRF1	down	YES
2137.59	0.34762	0.0352448	9.86299	6.0226e-23	8.84197e-22	ENSG00000198018.7_ENTPD7	up	YES
31.8834	4.01614	0.407548	9.8544	6.56102e-23	9.62037e-22	ENSG00000142621.20_FHAD1	up	YES
461.813	0.683955	0.0694662	9.84587	7.14187e-23	1.04589e-21	ENSG00000122884.13_P4HA1	up	YES
4847.12	0.267637	0.0272019	9.8389	7.65452e-23	1.11957e-21	ENSG00000215021.10_PHB2	up	YES
595.911	0.579366	0.0589302	9.8314	8.24618e-23	1.2046e-21	ENSG00000179085.8_DPM3	up	YES
201.676	0.995313	0.101243	9.83096	8.28283e-23	1.20845e-21	ENSG00000106066.15_CPVL	up	YES
9605.03	0.235469	0.0239727	9.8224	9.01668e-23	1.31388e-21	ENSG00000240342.3_RPS2P5	up	YES
213.59	0.9994	0.101753	9.8218	9.07132e-23	1.31968e-21	ENSG00000010704.19_HFE	up	YES
1631.65	-0.407536	0.0414934	-9.82171	9.07908e-23	1.31968e-21	ENSG00000149948.14_HMGA2	down	YES
5127.81	-0.311423	0.0317157	-9.81923	9.30546e-23	1.35091e-21	ENSG00000088247.18_KHSRP	down	YES
408.417	0.723229	0.0736664	9.81762	9.45454e-23	1.37085e-21	ENSG00000006576.16_PHTF2	up	YES
1674.67	-0.379659	0.0386789	-9.81567	9.63924e-23	1.3959e-21	ENSG00000111206.13_FOXM1	down	YES
4182.98	-0.305513	0.0311574	-9.80548	1.06643e-22	1.54243e-21	ENSG00000105401.9_CDC37	down	YES
1829.95	-0.366665	0.0374331	-9.7952	1.18067e-22	1.70556e-21	ENSG00000182095.15_TNRC18	down	YES
343.691	0.752532	0.0768436	9.79304	1.20612e-22	1.74018e-21	ENSG00000086848.15_ALG9	up	YES
180.923	1.0274	0.104988	9.78589	1.29453e-22	1.86543e-21	ENSG00000160746.13_ANO10	up	YES
1145.1	-0.434871	0.0444624	-9.78064	1.36342e-22	1.96228e-21	ENSG00000090615.15_GOLGA3	down	YES
596.33	0.61785	0.0632485	9.76862	1.53531e-22	2.20697e-21	ENSG00000135317.14_SNX14	up	YES
780.044	0.531988	0.0545159	9.7584	1.69818e-22	2.43809e-21	ENSG00000122642.11_FKBP9	up	YES
851.574	0.502318	0.0514969	9.75434	1.76746e-22	2.53444e-21	ENSG00000104689.10_TNFRSF10A	up	YES
542.156	0.633394	0.0650425	9.73816	2.07263e-22	2.96841e-21	ENSG00000134531.10_EMP1	up	YES
586.452	0.576164	0.0591694	9.73754	2.08539e-22	2.98302e-21	ENSG00000158710.15_TAGLN2	up	YES
3283.75	-0.298572	0.0306797	-9.73189	2.20457e-22	3.14674e-21	ENSG00000087365.16_SF3B2	down	YES
2796.79	0.310161	0.031871	9.73177	2.20722e-22	3.14674e-21	ENSG00000109736.15_MFSD10	up	YES
309.966	0.795405	0.0817331	9.73174	2.20791e-22	3.14674e-21	ENSG00000137842.7_TMEM62	up	YES
335.606	0.74438	0.0765119	9.72894	2.26946e-22	3.23052e-21	ENSG00000101017.14_CD40	up	YES
1739.79	0.372583	0.0382981	9.7285	2.27939e-22	3.24072e-21	ENSG00000169567.13_HINT1	up	YES
652.757	-0.557449	0.0573487	-9.72035	2.46931e-22	3.50648e-21	ENSG00000055609.21_KMT2C	down	YES
789.542	0.508668	0.0523768	9.7117	2.68812e-22	3.81256e-21	ENSG00000184743.13_ATL3	up	YES
1557.11	0.382055	0.0393615	9.70632	2.83389e-22	4.01444e-21	ENSG00000126773.13_PCNX4	up	YES
321.492	0.766493	0.0790318	9.69855	3.05826e-22	4.32705e-21	ENSG00000065600.13_PACC1	up	YES
5623.37	-0.248684	0.0256431	-9.6979	3.07769e-22	4.34928e-21	ENSG00000108854.16_SMURF2	down	YES
1559.76	-0.382743	0.039483	-9.69386	3.20182e-22	4.51924e-21	ENSG00000167670.16_CHAF1A	down	YES
2219.69	0.406372	0.0419359	9.69031	3.31513e-22	4.67353e-21	ENSG00000203875.13_SNHG5	up	YES
6537.64	0.244766	0.0253016	9.67394	3.89112e-22	5.47893e-21	ENSG00000134333.14_LDHA	up	YES
1094.36	0.455922	0.0471395	9.67175	3.97514e-22	5.59052e-21	ENSG00000198925.12_ATG9A	up	YES
1894.95	-0.375789	0.0388709	-9.66761	4.13943e-22	5.81458e-21	ENSG00000100320.23_RBFOX2	down	YES
680.229	0.540976	0.0560437	9.65276	4.78485e-22	6.71313e-21	ENSG00000146828.18_SLC12A9	up	YES
451.707	0.644108	0.0667441	9.65041	4.89607e-22	6.86095e-21	ENSG00000119514.7_GALNT12	up	YES
85.0276	1.52658	0.15821	9.64904	4.96169e-22	6.94458e-21	ENSG00000021826.17_CPS1	up	YES
1819.61	-0.3556	0.0368646	-9.6461	5.10591e-22	7.13791e-21	ENSG00000275023.5_MLLT6	down	YES
268.115	0.842224	0.0873347	9.64364	5.23011e-22	7.30281e-21	ENSG00000105409.19_ATP1A3	up	YES
393.852	0.685898	0.0711683	9.63769	5.54227e-22	7.72945e-21	ENSG00000110013.13_SIAE	up	YES
70.0874	1.70318	0.176748	9.6362	5.6231e-22	7.83285e-21	ENSG00000170961.7_HAS2	up	YES
347.046	0.732752	0.0760605	9.6338	5.75607e-22	8.00853e-21	ENSG00000139370.12_SLC15A4	up	YES
1209.12	-0.439491	0.0456321	-9.63116	5.90565e-22	8.2069e-21	ENSG00000125686.12_MED1	down	YES
718.332	0.517959	0.0537884	9.62957	5.99793e-22	8.32524e-21	ENSG00000168701.19_TMEM208	up	YES
351.717	-0.734662	0.0763045	-9.62803	6.08879e-22	8.44134e-21	ENSG00000054654.19_SYNE2	down	YES
218.149	0.917786	0.0954659	9.61376	6.99476e-22	9.68588e-21	ENSG00000164124.11_TMEM144	up	YES
759.352	0.514485	0.0535179	9.61331	7.02502e-22	9.71629e-21	ENSG00000003989.18_SLC7A2	up	YES
2342.83	-0.334919	0.0348596	-9.60765	7.42213e-22	1.02534e-20	ENSG00000097007.19_ABL1	down	YES
889.647	0.473414	0.0492868	9.60529	7.59417e-22	1.04787e-20	ENSG00000015532.10_XYLT2	up	YES
327.067	0.767176	0.0799168	9.59968	8.01923e-22	1.10522e-20	ENSG00000249992.2_TMEM158	up	YES
200.39	0.954778	0.0994623	9.59939	8.04196e-22	1.10705e-20	ENSG00000123094.15_RASSF8	up	YES
1731.96	0.375245	0.0390923	9.59894	8.07676e-22	1.11053e-20	ENSG00000068366.21_ACSL4	up	YES
1718.75	0.365934	0.0381497	9.59204	8.63622e-22	1.18606e-20	ENSG00000233276.8_GPX1	up	YES
391.212	0.689278	0.0718741	9.59008	8.80145e-22	1.20734e-20	ENSG00000197296.6_FITM2	up	YES
773.066	-0.506471	0.0528147	-9.58957	8.84519e-22	1.2105e-20	ENSG00000160299.17_PCNT	down	YES
993.275	0.463542	0.0483378	9.58963	8.84025e-22	1.2105e-20	ENSG00000196715.7_VKORC1L1	up	YES
1844.61	-0.4034	0.0420864	-9.58504	9.24251e-22	1.26339e-20	ENSG00000143256.5_PFDN2	down	YES
727.752	0.538778	0.0562396	9.58003	9.70132e-22	1.32456e-20	ENSG00000117868.17_ESYT2	up	YES
859.49	-0.493274	0.0514961	-9.57886	9.81202e-22	1.33812e-20	ENSG00000005810.19_MYCBP2	down	YES
377.366	0.724752	0.0757307	9.57013	1.06774e-21	1.45444e-20	ENSG00000136521.13_NDUFB5	up	YES
388.66	0.784322	0.0819994	9.56497	1.12233e-21	1.52702e-20	ENSG00000096092.6_TMEM14A	up	YES
11552.8	-0.238387	0.0249425	-9.55746	1.20685e-21	1.64011e-20	ENSG00000063046.18_EIF4B	down	YES
492.784	0.630608	0.0661273	9.53627	1.48057e-21	2.00976e-20	ENSG00000175348.11_TMEM9B	up	YES
12191	0.213345	0.0223751	9.53492	1.49996e-21	2.03372e-20	ENSG00000111371.16_SLC38A1	up	YES
793.483	0.496156	0.0520923	9.52456	1.6574e-21	2.24459e-20	ENSG00000167645.17_YIF1B	up	YES
492.208	0.621395	0.0652496	9.52335	1.67685e-21	2.2683e-20	ENSG00000144802.11_NFKBIZ	up	YES
513.516	0.603748	0.0634151	9.52056	1.72252e-21	2.32739e-20	ENSG00000164626.9_KCNK5	up	YES
1372.41	-0.491187	0.0516021	-9.51874	1.75293e-21	2.36575e-20	ENSG00000157106.17_SMG1	down	YES
779.922	0.507796	0.0533509	9.51803	1.76487e-21	2.37912e-20	ENSG00000011105.14_TSPAN9	up	YES
529.858	0.612995	0.0645142	9.50171	2.0648e-21	2.78023e-20	ENSG00000102316.17_MAGED2	up	YES
1223.38	-0.425669	0.0448133	-9.49872	2.12484e-21	2.85779e-20	ENSG00000153317.15_ASAP1	down	YES
351.686	0.721178	0.0759549	9.49482	2.2059e-21	2.96341e-20	ENSG00000139324.12_TMTC3	up	YES
1051.66	0.432799	0.0455964	9.49196	2.26732e-21	3.04242e-20	ENSG00000157227.14_MMP14	up	YES
3770.82	0.285789	0.0301728	9.47175	2.75191e-21	3.68844e-20	ENSG00000126777.18_KTN1	up	YES
601.656	0.562128	0.0593991	9.46358	2.97589e-21	3.98409e-20	ENSG00000162729.14_IGSF8	up	YES
384.211	0.677679	0.0716242	9.46159	3.03286e-21	4.05571e-20	ENSG00000189077.11_TMEM120A	up	YES
480.765	0.622018	0.0657865	9.45509	3.22732e-21	4.30708e-20	ENSG00000068001.14_HYAL2	up	YES
1819.32	0.357953	0.0378583	9.45507	3.22819e-21	4.30708e-20	ENSG00000213676.13_ATF6B	up	YES
1129.93	-0.450058	0.0476512	-9.44483	3.55969e-21	4.74396e-20	ENSG00000198752.11_CDC42BPB	down	YES
464.704	0.637408	0.0675113	9.44149	3.67515e-21	4.89226e-20	ENSG00000137700.18_SLC37A4	up	YES
931.964	0.45395	0.0480838	9.4408	3.69936e-21	4.91889e-20	ENSG00000119787.14_ATL2	up	YES
469.518	0.633438	0.0671828	9.42857	4.15698e-21	5.52109e-20	ENSG00000185115.6_NSMCE3	up	YES
1631.28	-0.384548	0.0408474	-9.41425	4.76484e-21	6.32125e-20	ENSG00000133030.22_MPRIP	down	YES
4138.41	0.277602	0.0295149	9.40548	5.17931e-21	6.86332e-20	ENSG00000196576.16_PLXNB2	up	YES
11317.2	-0.216814	0.0230614	-9.40159	5.37439e-21	7.11377e-20	ENSG00000187514.17_PTMA	down	YES
653.479	0.553817	0.0589243	9.39878	5.51992e-21	7.29815e-20	ENSG00000145284.12_SCD5	up	YES
2937.85	-0.303679	0.0323272	-9.39392	5.78064e-21	7.63423e-20	ENSG00000100813.15_ACIN1	down	YES
278.209	0.787535	0.0838405	9.39326	5.81734e-21	7.67404e-20	ENSG00000135452.10_TSPAN31	up	YES
1559.36	-0.372433	0.0396616	-9.39027	5.98441e-21	7.88553e-20	ENSG00000067798.16_NAV3	down	YES
496.396	0.615965	0.0655969	9.39016	5.99116e-21	7.88555e-20	ENSG00000172954.14_LCLAT1	up	YES
785.253	0.552921	0.0589278	9.38302	6.41112e-21	8.42882e-20	ENSG00000214160.10_ALG3	up	YES
888.202	0.483087	0.0514898	9.38218	6.46242e-21	8.48673e-20	ENSG00000003436.16_TFPI	up	YES
686.959	0.525054	0.0559921	9.37729	6.76894e-21	8.8793e-20	ENSG00000013523.11_ANGEL1	up	YES
322.934	0.741344	0.0792691	9.35225	8.58026e-21	1.12427e-19	ENSG00000136048.14_DRAM1	up	YES
246.249	0.867826	0.0928398	9.34757	8.96876e-21	1.17386e-19	ENSG00000164073.11_MFSD8	up	YES
4589.58	-0.281748	0.0301877	-9.3332	1.02725e-20	1.34301e-19	ENSG00000115677.18_HDLBP	down	YES
5091.8	0.308396	0.0330665	9.32654	1.09385e-20	1.42847e-19	ENSG00000130164.14_LDLR	up	YES
250.656	0.844739	0.0905912	9.32473	1.11265e-20	1.4514e-19	ENSG00000138604.10_GLCE	up	YES
2981	-0.290907	0.0312015	-9.3235	1.12563e-20	1.4667e-19	ENSG00000101150.18_TPD52L2	down	YES
564.554	0.558185	0.0598719	9.323	1.13098e-20	1.47203e-19	ENSG00000076716.9_GPC4	up	YES
445.8	0.66341	0.0711672	9.32185	1.14327e-20	1.48637e-19	ENSG00000164815.11_ORC5	up	YES
933.359	0.453298	0.0486315	9.32109	1.15147e-20	1.49537e-19	ENSG00000174915.12_PTDSS2	up	YES
4819.07	0.651801	0.070061	9.30334	1.36107e-20	1.76562e-19	ENSG00000185883.12_ATP6V0C	up	YES
1293.42	0.425154	0.0457179	9.29949	1.41115e-20	1.82855e-19	ENSG00000109572.14_CLCN3	up	YES
156.214	1.07087	0.11536	9.28285	1.6501e-20	2.13582e-19	ENSG00000139974.16_SLC38A6	up	YES
550.514	0.597547	0.0644386	9.27312	1.80774e-20	2.33727e-19	ENSG00000155850.8_SLC26A2	up	YES
1409.8	0.38683	0.0417911	9.25628	2.11688e-20	2.73395e-19	ENSG00000148834.13_GSTO1	up	YES
457.95	0.637962	0.068991	9.24704	2.30806e-20	2.97757e-19	ENSG00000162694.14_EXTL2	up	YES
226.573	0.954598	0.103415	9.23072	2.68812e-20	3.46406e-19	ENSG00000088035.18_ALG6	up	YES
381.235	-0.692911	0.0751107	-9.2252	2.83045e-20	3.64346e-19	ENSG00000010818.10_HIVEP2	down	YES
1479.85	0.379328	0.0411634	9.2152	3.10707e-20	3.99515e-19	ENSG00000154978.13_VOPP1	up	YES
320.76	0.72603	0.078816	9.21172	3.20951e-20	4.12233e-19	ENSG00000134575.13_ACP2	up	YES
677.506	0.541797	0.0588227	9.21069	3.24048e-20	4.15755e-19	ENSG00000178202.13_POGLUT3	up	YES
501.141	0.611125	0.0663531	9.21019	3.25537e-20	4.17208e-19	ENSG00000165264.11_NDUFB6	up	YES
9461.56	-0.22154	0.0240958	-9.19415	3.77956e-20	4.83858e-19	ENSG00000153187.20_HNRNPU	down	YES
353.919	0.69518	0.0756853	9.18514	4.11004e-20	5.25591e-19	ENSG00000088298.13_EDEM2	up	YES
10103.6	-0.206318	0.0224746	-9.18004	4.30919e-20	5.50457e-19	ENSG00000113013.16_HSPA9	down	YES
59.6487	9.44798	1.03027	9.1704	4.71265e-20	6.01338e-19	ENSG00000155886.11_SLC24A2	up	YES
10705.4	-0.240829	0.0262652	-9.16912	4.76909e-20	6.07877e-19	ENSG00000142676.14_RPL11	down	YES
1458.2	-0.381888	0.0416656	-9.16556	4.92917e-20	6.27598e-19	ENSG00000055483.19_USP36	down	YES
942.524	0.450559	0.0491749	9.16237	5.07677e-20	6.45687e-19	ENSG00000131748.16_STARD3	up	YES
275.114	0.802731	0.0876742	9.15584	5.39344e-20	6.85219e-19	ENSG00000082996.20_RNF13	up	YES
2688.32	-0.351332	0.0384251	-9.14329	6.05793e-20	7.68805e-19	ENSG00000134686.19_PHC2	down	YES
462.249	0.618379	0.0676444	9.14163	6.15198e-20	7.79895e-19	ENSG00000106392.11_C1GALT1	up	YES
1674.38	-0.361288	0.0395546	-9.13391	6.60705e-20	8.36678e-19	ENSG00000142002.18_DPP9	down	YES
491.108	0.581795	0.0637039	9.1328	6.67488e-20	8.44354e-19	ENSG00000135750.15_KCNK1	up	YES
1012.18	-0.428092	0.0468943	-9.12889	6.92074e-20	8.7451e-19	ENSG00000054523.19_KIF1B	down	YES
1102.34	-0.44949	0.049281	-9.12096	7.446e-20	9.39866e-19	ENSG00000038382.20_TRIO	down	YES
726.288	0.487932	0.0535708	9.10818	8.3779e-20	1.05636e-18	ENSG00000090432.7_MUL1	up	YES
1982.06	-0.346836	0.0381289	-9.0964	9.3374e-20	1.17503e-18	ENSG00000065526.12_SPEN	down	YES
413.308	0.640102	0.0703688	9.09638	9.33921e-20	1.17503e-18	ENSG00000163900.11_TMEM41A	up	YES
971.05	0.504449	0.0555004	9.0891	9.98637e-20	1.25511e-18	ENSG00000241837.7_ATP5PO	up	YES
374.983	0.681455	0.0750267	9.08283	1.05788e-19	1.32814e-18	ENSG00000151353.15_TMEM18	up	YES
714.851	0.492427	0.0542545	9.07623	1.12398e-19	1.40961e-18	ENSG00000158850.15_B4GALT3	up	YES
2279.22	-0.315308	0.0349069	-9.03283	1.67296e-19	2.09585e-18	ENSG00000164104.12_HMGB2	down	YES
3675.67	0.300848	0.0333292	9.02654	1.77188e-19	2.2174e-18	ENSG00000173221.14_GLRX	up	YES
4327.96	-0.352271	0.0390542	-9.02006	1.87988e-19	2.35006e-18	ENSG00000120738.8_EGR1	down	YES
1550.14	-0.388899	0.0431286	-9.01719	1.92975e-19	2.40982e-18	ENSG00000071054.16_MAP4K4	down	YES
740.469	0.496529	0.0550792	9.01482	1.97186e-19	2.45978e-18	ENSG00000188706.13_ZDHHC9	up	YES
780.499	0.47764	0.052985	9.01464	1.97523e-19	2.46135e-18	ENSG00000103429.11_BFAR	up	YES
8541.57	0.25188	0.0280011	8.99536	2.35452e-19	2.93088e-18	ENSG00000103257.9_SLC7A5	up	YES
2068.39	0.335213	0.0372762	8.99268	2.41265e-19	3.00004e-18	ENSG00000134247.10_PTGFRN	up	YES
1445.39	-0.39778	0.0442356	-8.9923	2.42103e-19	3.00726e-18	ENSG00000167258.15_CDK12	down	YES
1847.63	-0.35037	0.0389704	-8.99066	2.4576e-19	3.04946e-18	ENSG00000099331.14_MYO9B	down	YES
2923.73	-0.32392	0.0360324	-8.98967	2.47964e-19	3.07354e-18	ENSG00000143799.14_PARP1	down	YES
17103	-0.202062	0.0224966	-8.98187	2.66192e-19	3.29599e-18	ENSG00000115053.17_NCL	down	YES
623.149	0.523176	0.0582759	8.97756	2.76829e-19	3.42407e-18	ENSG00000160326.14_SLC2A6	up	YES
356.749	0.674267	0.0751474	8.97259	2.89629e-19	3.57861e-18	ENSG00000131650.14_KREMEN2	up	YES
996.108	-0.443949	0.0494866	-8.9711	2.93559e-19	3.62335e-18	ENSG00000100207.21_TCF20	down	YES
1802.94	0.33421	0.0373064	8.95851	3.29085e-19	4.05756e-18	ENSG00000196411.10_EPHB4	up	YES
5886.77	0.251506	0.0280756	8.95816	3.30134e-19	4.06621e-18	ENSG00000197157.11_SND1	up	YES
2048.46	-0.32754	0.0365653	-8.95766	3.31631e-19	4.08035e-18	ENSG00000184640.20_SEPTIN9	down	YES
3258.67	0.277659	0.0310792	8.93392	4.11165e-19	5.05361e-18	ENSG00000082641.16_NFE2L1	up	YES
11758.8	-0.199373	0.0223302	-8.9284	4.32212e-19	5.30672e-18	ENSG00000089280.19_FUS	down	YES
309.809	0.726541	0.081393	8.92633	4.40375e-19	5.40128e-18	ENSG00000198689.13_SLC9A6	up	YES
2040.96	-0.330476	0.0370476	-8.92032	4.64923e-19	5.6964e-18	ENSG00000116717.13_GADD45A	down	YES
1039.03	0.428096	0.0479944	8.91971	4.6753e-19	5.72235e-18	ENSG00000108523.16_RNF167	up	YES
2039.89	0.327248	0.0367191	8.91221	5.00257e-19	6.11652e-18	ENSG00000158470.5_B4GALT5	up	YES
2069.22	0.351814	0.039498	8.90713	5.23723e-19	6.39675e-18	ENSG00000136026.14_CKAP4	up	YES
2717.18	-0.293702	0.0329788	-8.90579	5.30092e-19	6.46779e-18	ENSG00000100836.11_PABPN1	down	YES
456.417	0.644079	0.0723362	8.90396	5.38882e-19	6.56818e-18	ENSG00000115446.12_UNC50	up	YES
3204.88	-0.271147	0.0304673	-8.8996	5.60505e-19	6.82463e-18	ENSG00000139645.11_ANKRD52	down	YES
2264.56	-0.305929	0.0344039	-8.89228	5.98658e-19	7.28159e-18	ENSG00000107263.19_RAPGEF1	down	YES
1827.2	0.342991	0.0385829	8.8897	6.12725e-19	7.44496e-18	ENSG00000008311.16_AASS	up	YES
1113.83	0.399881	0.0450026	8.88573	6.35016e-19	7.7078e-18	ENSG00000100596.7_SPTLC2	up	YES
257.888	0.776484	0.0873967	8.88459	6.4157e-19	7.77928e-18	ENSG00000169684.13_CHRNA5	up	YES
1389.7	0.360362	0.0406532	8.86428	7.70011e-19	9.32702e-18	ENSG00000156976.17_EIF4A2	up	YES
696.905	0.497187	0.0560936	8.86351	7.75326e-19	9.38168e-18	ENSG00000107779.14_BMPR1A	up	YES
51.2358	1.91601	0.216377	8.855	8.36874e-19	1.0116e-17	ENSG00000179873.14_NLRP11	up	YES
2342.75	-0.307898	0.0347875	-8.85082	8.68797e-19	1.0491e-17	ENSG00000170004.18_CHD3	down	YES
150.596	1.00797	0.113892	8.85016	8.73907e-19	1.05418e-17	ENSG00000156535.15_CD109	up	YES
390.586	0.631961	0.0714534	8.84438	9.20367e-19	1.10909e-17	ENSG00000184164.15_CRELD2	up	YES
268.547	0.755989	0.0854798	8.84407	9.22902e-19	1.111e-17	ENSG00000143819.13_EPHX1	up	YES
440.881	0.611698	0.0692438	8.83397	1.01024e-18	1.21489e-17	ENSG00000205084.11_TMEM231	up	YES
297.475	0.764493	0.086577	8.8302	1.04486e-18	1.25523e-17	ENSG00000197822.12_OCLN	up	YES
1062.17	0.404797	0.0458646	8.82593	1.08558e-18	1.3028e-17	ENSG00000174106.3_LEMD3	up	YES
3029.01	0.28643	0.0324561	8.82515	1.09314e-18	1.3092e-17	ENSG00000084754.12_HADHA	up	YES
746.265	-0.499108	0.0565548	-8.82521	1.09254e-18	1.3092e-17	ENSG00000117713.20_ARID1A	down	YES
274.271	0.788942	0.0894865	8.81633	1.18275e-18	1.41506e-17	ENSG00000243749.1_TMEM35B	up	YES
427.405	0.648343	0.0735766	8.81181	1.23142e-18	1.47179e-17	ENSG00000104290.11_FZD3	up	YES
679.094	0.528199	0.0599483	8.81091	1.24137e-18	1.48217e-17	ENSG00000121940.16_CLCC1	up	YES
1139.93	-0.401846	0.0456392	-8.80484	1.31041e-18	1.56301e-17	ENSG00000171634.18_BPTF	down	YES
14868.2	0.544009	0.0618175	8.80025	1.36512e-18	1.62661e-17	ENSG00000231500.7_RPS18	up	YES
753.81	0.471974	0.0536359	8.79959	1.37311e-18	1.63446e-17	ENSG00000168288.13_MMADHC	up	YES
1056.91	0.406536	0.0462749	8.78522	1.56061e-18	1.85576e-17	ENSG00000142166.13_IFNAR1	up	YES
2762.36	-0.297879	0.0339551	-8.77272	1.74401e-18	2.07174e-17	ENSG00000196365.12_LONP1	down	YES
677.073	0.499149	0.0569547	8.76396	1.88501e-18	2.23697e-17	ENSG00000188807.13_TMEM201	up	YES
933.419	-0.455299	0.0519788	-8.75932	1.96423e-18	2.32862e-17	ENSG00000110395.7_CBL	down	YES
217.492	0.874494	0.100006	8.74438	2.24242e-18	2.65572e-17	ENSG00000173409.14_ARV1	up	YES
230.827	0.809067	0.0925641	8.74062	2.31844e-18	2.74298e-17	ENSG00000134901.13_POGLUT2	up	YES
1702.13	0.343354	0.0393103	8.73446	2.4482e-18	2.89358e-17	ENSG00000167619.13_TMEM145	up	YES
3730.82	-0.276798	0.0316928	-8.7338	2.46258e-18	2.90763e-17	ENSG00000090861.17_AARS1	down	YES
342.438	0.671328	0.0769752	8.72135	2.74916e-18	3.24273e-17	ENSG00000135776.5_ABCB10	up	YES
632.927	-0.517395	0.0593355	-8.71982	2.7864e-18	3.28334e-17	ENSG00000100354.21_TNRC6B	down	YES
672.601	0.503372	0.0577365	8.71844	2.82053e-18	3.32022e-17	ENSG00000174227.16_PIGG	up	YES
3438.66	-0.315939	0.0362458	-8.71657	2.8676e-18	3.37223e-17	ENSG00000105323.17_HNRNPUL1	down	YES
1581.69	-0.35812	0.0410885	-8.71583	2.88641e-18	3.39096e-17	ENSG00000169398.19_PTK2	down	YES
394.703	0.658513	0.075556	8.71556	2.89321e-18	3.39553e-17	ENSG00000137210.14_TMEM14B	up	YES
190.354	0.931518	0.106891	8.71467	2.91595e-18	3.41879e-17	ENSG00000100564.9_PIGH	up	YES
8594.9	-0.201183	0.0231035	-8.70789	3.09572e-18	3.62593e-17	ENSG00000129351.17_ILF3	down	YES
338.78	-0.679026	0.0780625	-8.6985	3.36305e-18	3.93511e-17	ENSG00000168502.17_MTCL1	down	YES
1939.4	-0.328759	0.0377977	-8.69785	3.38237e-18	3.95376e-17	ENSG00000213923.13_CSNK1E	down	YES
6037.84	-0.233845	0.0268954	-8.69462	3.48007e-18	4.0639e-17	ENSG00000161011.20_SQSTM1	down	YES
505.053	0.57977	0.0667359	8.68753	3.70404e-18	4.32113e-17	ENSG00000143797.12_MBOAT2	up	YES
1676.56	0.344012	0.0396839	8.66882	4.36624e-18	5.08858e-17	ENSG00000011422.12_PLAUR	up	YES
864.113	-0.444503	0.0512807	-8.66804	4.39616e-18	5.11836e-17	ENSG00000130779.22_CLIP1	down	YES
412.035	0.609716	0.0704438	8.65536	4.91378e-18	5.71533e-17	ENSG00000116704.8_SLC35D1	up	YES
527.14	-0.549644	0.0635083	-8.65468	4.94303e-18	5.74363e-17	ENSG00000163820.15_FYCO1	down	YES
5074.03	-0.229213	0.0265013	-8.64913	5.1895e-18	6.02404e-17	ENSG00000184216.14_IRAK1	down	YES
1927.69	-0.320919	0.0371137	-8.64692	5.29061e-18	6.13532e-17	ENSG00000137497.18_NUMA1	down	YES
6544.4	-0.252128	0.0291795	-8.64056	5.59363e-18	6.48031e-17	ENSG00000197102.14_DYNC1H1	down	YES
483.394	0.596943	0.0691494	8.63265	5.99449e-18	6.93783e-17	ENSG00000197496.6_SLC2A10	up	YES
1201.77	-0.380448	0.0440877	-8.62936	6.16965e-18	7.13351e-17	ENSG00000013810.21_TACC3	down	YES
5682.77	-0.229246	0.0265764	-8.62592	6.35816e-18	7.34421e-17	ENSG00000182944.18_EWSR1	down	YES
852.42	0.429494	0.0498436	8.61684	6.88265e-18	7.9422e-17	ENSG00000165102.15_HGSNAT	up	YES
2647.38	-0.286637	0.0332657	-8.61661	6.89675e-18	7.95063e-17	ENSG00000088325.16_TPX2	down	YES
763.036	0.481005	0.0558421	8.61365	7.07722e-18	8.15064e-17	ENSG00000171488.15_LRRC8C	up	YES
734.656	0.486921	0.0565551	8.60968	7.3265e-18	8.42944e-17	ENSG00000163785.13_RYK	up	YES
345.057	0.664084	0.0771709	8.60538	7.60671e-18	8.74323e-17	ENSG00000162604.12_TM2D1	up	YES
780.524	-0.457442	0.0531786	-8.60199	7.83447e-18	8.99618e-17	ENSG00000163166.15_IWS1	down	YES
14783.5	-0.19347	0.0225113	-8.59433	8.37524e-18	9.60771e-17	ENSG00000175166.17_PSMD2	down	YES
328.083	-0.672964	0.0783053	-8.5941	8.3917e-18	9.61716e-17	ENSG00000140836.17_ZFHX3	down	YES
2026.45	0.307899	0.0358293	8.5935	8.43583e-18	9.65828e-17	ENSG00000156599.11_ZDHHC5	up	YES
814.978	0.436563	0.0508291	8.58883	8.78577e-18	1.00491e-16	ENSG00000196950.14_SLC39A10	up	YES
547.655	0.533344	0.06213	8.58432	9.13741e-18	1.04411e-16	ENSG00000112893.10_MAN2A1	up	YES
699.824	0.485312	0.0565469	8.58246	9.28623e-18	1.06008e-16	ENSG00000196455.8_PIK3R4	up	YES
518.902	0.542642	0.0632479	8.57961	9.51937e-18	1.08458e-16	ENSG00000078124.13_ACER3	up	YES
468.114	0.559927	0.0652619	8.57969	9.51265e-18	1.08458e-16	ENSG00000175893.12_ZDHHC21	up	YES
5325.54	-0.310224	0.0362141	-8.56638	1.0679e-17	1.21552e-16	ENSG00000148773.14_MKI67	down	YES
1699.74	-0.327036	0.0382232	-8.55597	1.16877e-17	1.32904e-16	ENSG00000169871.13_TRIM56	down	YES
310.903	0.71184	0.0832374	8.55193	1.21051e-17	1.37516e-16	ENSG00000114395.11_CYB561D2	up	YES
1191.82	0.393255	0.0459899	8.5509	1.22133e-17	1.38611e-16	ENSG00000005884.18_ITGA3	up	YES
245.651	0.78568	0.0919035	8.54896	1.24198e-17	1.40817e-16	ENSG00000130962.18_PRRG1	up	YES
430.904	0.582072	0.0680953	8.5479	1.25346e-17	1.41982e-16	ENSG00000106484.16_MEST	up	YES
1496.14	0.351446	0.0411424	8.54218	1.31708e-17	1.49044e-16	ENSG00000121057.13_AKAP1	up	YES
983.661	0.445417	0.0521483	8.54134	1.32674e-17	1.49992e-16	ENSG00000164405.11_UQCRQ	up	YES
1835.89	0.328668	0.0384991	8.53704	1.37709e-17	1.55534e-16	ENSG00000078668.14_VDAC3	up	YES
3566.67	0.257003	0.0301745	8.51725	1.6339e-17	1.84362e-16	ENSG00000139514.13_SLC7A1	up	YES
15809.2	0.187259	0.0219888	8.5161	1.65021e-17	1.86022e-16	ENSG00000137154.13_RPS6	up	YES
511.429	0.57378	0.0675128	8.49883	1.91504e-17	2.15668e-16	ENSG00000204427.12_ABHD16A	up	YES
1785.74	0.317435	0.0373518	8.49851	1.92035e-17	2.16058e-16	ENSG00000128567.17_PODXL	up	YES
78.4638	1.40203	0.165069	8.49357	2.00382e-17	2.25232e-16	ENSG00000002079.14_MYH16	up	YES
300.659	0.680568	0.0802253	8.48321	2.19063e-17	2.45994e-16	ENSG00000164953.17_TMEM67	up	YES
1485	0.367445	0.0433276	8.48061	2.24015e-17	2.51313e-16	ENSG00000144043.12_TEX261	up	YES
1188.38	0.426213	0.0502751	8.47761	2.29871e-17	2.57636e-16	ENSG00000277791.5_PSMB3	up	YES
836.965	0.437934	0.051718	8.46774	2.50205e-17	2.80158e-16	ENSG00000167323.12_STIM1	up	YES
179.995	0.874475	0.103313	8.46433	2.57632e-17	2.88198e-16	ENSG00000173083.16_HPSE	up	YES
436.908	0.585592	0.0691954	8.46288	2.6086e-17	2.91531e-16	ENSG00000115657.14_ABCB6	up	YES
1287.87	-0.368661	0.0435809	-8.45924	2.69122e-17	3.00477e-16	ENSG00000184787.19_UBE2G2	down	YES
694.694	0.483928	0.0572492	8.453	2.83903e-17	3.16678e-16	ENSG00000165476.14_REEP3	up	YES
2110.24	0.308876	0.0365617	8.44806	2.96176e-17	3.30053e-16	ENSG00000135862.6_LAMC1	up	YES
1589.18	0.353143	0.0418058	8.44723	2.98299e-17	3.32102e-16	ENSG00000129084.18_PSMA1	up	YES
732.892	0.458021	0.0542425	8.44396	3.06759e-17	3.41197e-16	ENSG00000134825.16_TMEM258	up	YES
3573.87	-0.259855	0.0307775	-8.44301	3.0926e-17	3.43652e-16	ENSG00000197694.18_SPTAN1	down	YES
318.956	0.68461	0.0811159	8.43989	3.17625e-17	3.52612e-16	ENSG00000117262.19_GPR89A	up	YES
160.003	0.940377	0.111442	8.43828	3.22052e-17	3.57188e-16	ENSG00000185090.15_MANEAL	up	YES
982.822	0.400585	0.0474755	8.43773	3.23557e-17	3.58517e-16	ENSG00000161921.17_CXCL16	up	YES
852.046	0.426946	0.0506317	8.43239	3.38676e-17	3.74915e-16	ENSG00000145730.21_PAM	up	YES
2761.88	-0.2851	0.0338293	-8.42761	3.52792e-17	3.90172e-16	ENSG00000160633.13_SAFB	down	YES
2563.26	-0.317224	0.0376846	-8.41787	3.83394e-17	4.23616e-16	ENSG00000160710.18_ADAR	down	YES
727.673	-0.452822	0.0538121	-8.41488	3.93312e-17	4.34164e-16	ENSG00000096696.15_DSP	down	YES
1803.92	-0.320477	0.038097	-8.41213	4.0263e-17	4.44031e-16	ENSG00000164985.15_PSIP1	down	YES
1075.75	0.393226	0.0467459	8.41198	4.0313e-17	4.44164e-16	ENSG00000101363.13_MANBAL	up	YES
2560.92	-0.279555	0.0332676	-8.40322	4.3441e-17	4.78178e-16	ENSG00000134954.14_ETS1	down	YES
660.085	0.508593	0.0605868	8.39445	4.68074e-17	5.14749e-16	ENSG00000135378.4_PRRG4	up	YES
454.642	0.562262	0.0670269	8.38861	4.91937e-17	5.40484e-16	ENSG00000159110.21_IFNAR2	up	YES
1076.51	-0.409385	0.0488657	-8.37775	5.395e-17	5.92184e-16	ENSG00000151208.17_DLG5	down	YES
2305.25	0.305854	0.0365328	8.37203	5.66331e-17	6.21053e-16	ENSG00000124067.17_SLC12A4	up	YES
866.462	0.420874	0.0502831	8.37008	5.75777e-17	6.30821e-16	ENSG00000213064.10_SFT2D2	up	YES
5036.98	0.223153	0.02667	8.36718	5.90115e-17	6.45925e-16	ENSG00000139629.16_GALNT6	up	YES
315.116	0.673009	0.0804531	8.36524	5.99921e-17	6.56045e-16	ENSG00000106080.11_FKBP14	up	YES
424.408	0.615731	0.0736146	8.36425	6.05006e-17	6.60987e-16	ENSG00000016864.19_GLT8D1	up	YES
1077.07	0.393465	0.0470466	8.3633	6.09883e-17	6.65695e-16	ENSG00000150938.10_CRIM1	up	YES
440.478	0.58796	0.0705007	8.33977	7.44361e-17	8.11722e-16	ENSG00000122643.23_NT5C3A	up	YES
696.422	-0.471137	0.056549	-8.33149	7.98298e-17	8.69728e-16	ENSG00000181555.21_SETD2	down	YES
721.455	-0.458607	0.055062	-8.32892	8.15804e-17	8.87974e-16	ENSG00000143970.18_ASXL2	down	YES
596.621	0.495499	0.0595046	8.32706	8.28735e-17	9.01211e-16	ENSG00000157837.16_SPPL3	up	YES
985.193	-0.391242	0.0469862	-8.32675	8.3093e-17	9.02759e-16	ENSG00000099290.17_WASHC2A	down	YES
1054.02	-0.391599	0.0470502	-8.323	8.57633e-17	9.30905e-16	ENSG00000066084.13_DIP2B	down	YES
1718.66	0.314044	0.0377468	8.31977	8.81334e-17	9.55745e-16	ENSG00000165283.16_STOML2	up	YES
1767.73	-0.34026	0.0409438	-8.31043	9.53594e-17	1.03315e-15	ENSG00000047410.14_TPR	down	YES
659.983	0.493872	0.059504	8.2998	1.04286e-16	1.12881e-15	ENSG00000131019.11_ULBP3	up	YES
680.67	0.464888	0.0560201	8.29859	1.05351e-16	1.13929e-15	ENSG00000118246.14_FASTKD2	up	YES
1608.86	-0.329724	0.0397676	-8.29127	1.12041e-16	1.21052e-15	ENSG00000104885.18_DOT1L	down	YES
232.4	0.758453	0.0915525	8.28435	1.1876e-16	1.28193e-15	ENSG00000165449.12_SLC16A9	up	YES
483.778	0.537396	0.0648796	8.28298	1.20135e-16	1.29557e-15	ENSG00000186501.15_TMEM222	up	YES
1044.21	-0.39171	0.0473096	-8.27971	1.23473e-16	1.33035e-15	ENSG00000065613.15_SLK	down	YES
2673.49	-0.282433	0.0341309	-8.27498	1.28477e-16	1.38299e-15	ENSG00000109685.19_NSD2	down	YES
942.824	0.431501	0.0521489	8.27439	1.29114e-16	1.38857e-15	ENSG00000111678.11_C12orf57	up	YES
877.605	0.413239	0.0499664	8.27034	1.33576e-16	1.43524e-15	ENSG00000179958.10_DCTPP1	up	YES
357.307	0.613527	0.074317	8.25554	1.5122e-16	1.62333e-15	ENSG00000111885.7_MAN1A1	up	YES
297.556	0.698679	0.0846526	8.25349	1.53833e-16	1.64986e-15	ENSG00000139826.6_ABHD13	up	YES
1958.8	-0.305683	0.0370467	-8.25129	1.56695e-16	1.67902e-15	ENSG00000007080.11_CCDC124	down	YES
3074.39	0.286968	0.0347864	8.24943	1.59148e-16	1.70374e-15	ENSG00000102144.15_PGK1	up	YES
1696.97	-0.366301	0.0444066	-8.24879	1.60001e-16	1.71131e-15	ENSG00000132466.19_ANKRD17	down	YES
746.396	0.440705	0.0534364	8.24727	1.6206e-16	1.73174e-15	ENSG00000151694.14_ADAM17	up	YES
234.714	0.81978	0.099642	8.22725	1.91557e-16	2.04508e-15	ENSG00000027697.15_IFNGR1	up	YES
413.303	0.577638	0.0702443	8.22327	1.98035e-16	2.11231e-15	ENSG00000169826.8_CSGALNACT2	up	YES
308.043	0.667738	0.0812557	8.21774	2.07369e-16	2.20986e-15	ENSG00000065485.20_PDIA5	up	YES
1522.02	0.357721	0.0435914	8.20623	2.28245e-16	2.43011e-15	ENSG00000185627.18_PSMD13	up	YES
2606.99	-0.275992	0.0336361	-8.20523	2.30147e-16	2.44813e-15	ENSG00000197879.17_MYO1C	down	YES
296.912	0.672494	0.0819674	8.20441	2.31731e-16	2.46275e-15	ENSG00000033170.17_FUT8	up	YES
1275.83	0.353786	0.0431855	8.19223	2.56431e-16	2.72278e-15	ENSG00000075568.17_TMEM131	up	YES
739.01	0.438936	0.0535977	8.18947	2.6238e-16	2.78342e-15	ENSG00000115652.15_UXS1	up	YES
1712.15	-0.329693	0.0402861	-8.18379	2.75058e-16	2.91527e-15	ENSG00000184897.6_H1-10	down	YES
2522.05	-0.302649	0.0369838	-8.18329	2.76188e-16	2.92459e-15	ENSG00000109111.15_SUPT6H	down	YES
1584.66	-0.320874	0.0392115	-8.18316	2.76504e-16	2.92529e-15	ENSG00000130254.12_SAFB2	down	YES
1410.85	0.354207	0.0432862	8.18292	2.77054e-16	2.92846e-15	ENSG00000102317.18_RBM3	up	YES
2224.77	-0.330054	0.0403444	-8.18093	2.81655e-16	2.97441e-15	ENSG00000153827.14_TRIP12	down	YES
516.471	0.559469	0.068439	8.17471	2.96576e-16	3.12915e-15	ENSG00000184990.13_SIVA1	up	YES
1276.26	-0.366663	0.044862	-8.17313	3.00495e-16	3.16765e-15	ENSG00000197555.10_SIPA1L1	down	YES
1374.49	-0.352568	0.0431644	-8.16801	3.1351e-16	3.30187e-15	ENSG00000149503.13_INCENP	down	YES
1784.44	-0.323117	0.0395789	-8.16388	3.24443e-16	3.41394e-15	ENSG00000148411.8_NACC2	down	YES
1463.9	-0.333301	0.0408532	-8.15851	3.39189e-16	3.5659e-15	ENSG00000119321.9_FKBP15	down	YES
782.552	-0.452762	0.0555284	-8.15371	3.52935e-16	3.70708e-15	ENSG00000084112.15_SSH1	down	YES
214.349	0.77598	0.0951932	8.15163	3.59039e-16	3.76782e-15	ENSG00000138459.9_SLC35A5	up	YES
483.815	0.543058	0.0666237	8.15111	3.60593e-16	3.78073e-15	ENSG00000164535.15_DAGLB	up	YES
765.896	0.465295	0.0571227	8.14552	3.7764e-16	3.95592e-15	ENSG00000148719.16_DNAJB12	up	YES
3265.5	-0.26286	0.0322753	-8.1443	3.81479e-16	3.99097e-15	ENSG00000048828.17_FAM120A	down	YES
3292.86	-0.301421	0.0370103	-8.14424	3.81667e-16	3.99097e-15	ENSG00000127616.20_SMARCA4	down	YES
809.864	-0.433909	0.0533045	-8.1402	3.94612e-16	4.12264e-15	ENSG00000183495.14_EP400	down	YES
520.211	0.5133	0.0630967	8.13513	4.11484e-16	4.29507e-15	ENSG00000163291.14_PAQR3	up	YES
1209.72	0.350438	0.043093	8.13214	4.2177e-16	4.39852e-15	ENSG00000165629.20_ATP5F1C	up	YES
556.611	0.489175	0.0601837	8.12803	4.36318e-16	4.54618e-15	ENSG00000214063.11_TSPAN4	up	YES
1916.91	0.297941	0.0366627	8.12653	4.41762e-16	4.59881e-15	ENSG00000172053.18_QARS1	up	YES
2012.62	-0.313662	0.0386071	-8.12446	4.49342e-16	4.67356e-15	ENSG00000263001.7_GTF2I	down	YES
2070.3	0.290626	0.0357961	8.11892	4.70342e-16	4.88763e-15	ENSG00000006831.10_ADIPOR2	up	YES
3581.63	-0.23998	0.0295635	-8.11746	4.76059e-16	4.94265e-15	ENSG00000146830.11_GIGYF1	down	YES
1278.7	0.35573	0.0438596	8.11067	5.03434e-16	5.22223e-15	ENSG00000136908.18_DPM2	up	YES
485.747	0.52151	0.0643036	8.11012	5.05711e-16	5.24121e-15	ENSG00000169733.12_RFNG	up	YES
513.703	0.525502	0.0648022	8.10932	5.09052e-16	5.27117e-15	ENSG00000163378.14_EOGT	up	YES
660.305	0.465328	0.057386	8.10874	5.11478e-16	5.2916e-15	ENSG00000204178.11_MACO1	up	YES
1656.94	0.315712	0.0389358	8.10852	5.12381e-16	5.29627e-15	ENSG00000111321.11_LTBR	up	YES
3065.44	-0.25692	0.0316978	-8.1053	5.26147e-16	5.43376e-15	ENSG00000111786.9_SRSF9	down	YES
3435.54	-0.248368	0.0306452	-8.10464	5.29021e-16	5.45862e-15	ENSG00000125944.21_HNRNPR	down	YES
554.947	0.509174	0.0628871	8.09663	5.65009e-16	5.82481e-15	ENSG00000051108.15_HERPUD1	up	YES
311.093	0.644816	0.0796534	8.09528	5.71343e-16	5.88493e-15	ENSG00000065665.21_SEC61A2	up	YES
4097.28	-0.251124	0.0310418	-8.08987	5.97276e-16	6.14664e-15	ENSG00000106682.16_EIF4H	down	YES
1403.39	0.370265	0.045792	8.08581	6.175e-16	6.34918e-15	ENSG00000132963.8_POMP	up	YES
1933.83	-0.292779	0.0362162	-8.0842	6.25755e-16	6.42841e-15	ENSG00000110092.4_CCND1	down	YES
2622.06	-0.281952	0.0349125	-8.07595	6.69532e-16	6.8721e-15	ENSG00000162734.13_PEA15	down	YES
620.305	0.465438	0.0576436	8.07441	6.78042e-16	6.95335e-15	ENSG00000004866.22_ST7	up	YES
503.871	0.52042	0.0644695	8.07235	6.89566e-16	7.06534e-15	ENSG00000160131.14_VMA21	up	YES
1375.19	0.341218	0.0423003	8.06656	7.23084e-16	7.40228e-15	ENSG00000105464.4_GRIN2D	up	YES
1280.85	-0.354373	0.0439427	-8.06444	7.3575e-16	7.52536e-15	ENSG00000175215.11_CTDSP2	down	YES
1077.11	0.377727	0.0469338	8.04809	8.4093e-16	8.59365e-15	ENSG00000105983.23_LMBR1	up	YES
1702.66	-0.309731	0.03849	-8.04706	8.48071e-16	8.65906e-15	ENSG00000064419.14_TNPO3	down	YES
1065.72	0.39425	0.0490161	8.04328	8.74645e-16	8.9226e-15	ENSG00000179222.18_MAGED1	up	YES
9508.77	-0.187912	0.0233665	-8.04195	8.84214e-16	9.01235e-15	ENSG00000188229.6_TUBB4B	down	YES
5180.1	0.238008	0.0296273	8.03342	9.47924e-16	9.65331e-15	ENSG00000101182.15_PSMA7	up	YES
1904.85	-0.292435	0.0364052	-8.03277	9.52955e-16	9.69611e-15	ENSG00000198231.13_DDX42	down	YES
974.798	0.382643	0.0476541	8.02959	9.77963e-16	9.94192e-15	ENSG00000129083.13_COPB1	up	YES
520.572	0.525825	0.0655004	8.0278	9.92349e-16	1.00794e-14	ENSG00000168575.10_SLC20A2	up	YES
838.175	0.411825	0.0513301	8.02306	1.03141e-15	1.04671e-14	ENSG00000177663.14_IL17RA	up	YES
256.702	0.697311	0.0869258	8.02191	1.04115e-15	1.05568e-14	ENSG00000137404.15_NRM	up	YES
859.977	0.400719	0.0500015	8.01414	1.1091e-15	1.1236e-14	ENSG00000145107.16_TM4SF19	up	YES
404.209	0.563043	0.0703748	8.00063	1.2378e-15	1.2529e-14	ENSG00000130958.13_SLC35D2	up	YES
1502.35	-0.322391	0.0402988	-8.00002	1.24404e-15	1.25812e-14	ENSG00000130559.19_CAMSAP1	down	YES
1133.55	-0.393657	0.0492295	-7.99636	1.28155e-15	1.29494e-14	ENSG00000148840.11_PPRC1	down	YES
5042.96	-0.23963	0.0300096	-7.98511	1.40396e-15	1.41741e-14	ENSG00000196642.19_RABL6	down	YES
2384.75	0.267708	0.0335264	7.98499	1.40528e-15	1.41752e-14	ENSG00000103064.15_SLC7A6	up	YES
947.193	0.380175	0.0476318	7.98153	1.44527e-15	1.45659e-14	ENSG00000149547.15_EI24	up	YES
1271.59	0.341632	0.0428047	7.98118	1.44938e-15	1.45948e-14	ENSG00000106588.12_PSMA2	up	YES
6050.33	-0.21752	0.0272744	-7.97526	1.52065e-15	1.52993e-14	ENSG00000105373.19_NOP53	down	YES
1525.7	0.314023	0.0393984	7.97047	1.5807e-15	1.58899e-14	ENSG00000149100.13_EIF3M	up	YES
4696.06	0.222136	0.0278841	7.96638	1.63392e-15	1.64107e-14	ENSG00000171314.9_PGAM1	up	YES
872.944	-0.400048	0.0502752	-7.95717	1.76023e-15	1.76642e-14	ENSG00000169925.17_BRD3	down	YES
6988.47	0.319851	0.0402017	7.95616	1.77461e-15	1.77932e-14	ENSG00000112306.8_RPS12	up	YES
225.492	0.752038	0.0945421	7.95453	1.79809e-15	1.80132e-14	ENSG00000239305.7_RNF103	up	YES
693.56	0.464602	0.0584196	7.95286	1.82257e-15	1.82429e-14	ENSG00000155256.18_ZFYVE27	up	YES
208.294	0.767258	0.0966865	7.93552	2.09612e-15	2.0963e-14	ENSG00000179163.12_FUCA1	up	YES
472.357	0.52126	0.0657152	7.93212	2.15442e-15	2.15276e-14	ENSG00000160712.13_IL6R	up	YES
4862.01	-0.215671	0.0272008	-7.92882	2.21245e-15	2.20886e-14	ENSG00000183963.19_SMTN	down	YES
891.618	0.388129	0.0489719	7.92553	2.27169e-15	2.26607e-14	ENSG00000131446.17_MGAT1	up	YES
741.091	0.456612	0.0576281	7.92344	2.31033e-15	2.30266e-14	ENSG00000106591.4_MRPL32	up	YES
807.837	0.440427	0.0555956	7.92198	2.33755e-15	2.3278e-14	ENSG00000109854.14_HTATIP2	up	YES
491.734	0.514779	0.0649875	7.92119	2.35244e-15	2.34063e-14	ENSG00000117620.15_SLC35A3	up	YES
523.523	0.562046	0.070968	7.9197	2.38083e-15	2.36687e-14	ENSG00000260916.8_CCPG1	up	YES
1343.96	-0.329947	0.0416733	-7.91746	2.42416e-15	2.4079e-14	ENSG00000068654.17_POLR1A	down	YES
1232.06	0.351534	0.0444118	7.91532	2.46612e-15	2.44751e-14	ENSG00000012232.9_EXTL3	up	YES
269.962	0.672636	0.0850066	7.91276	2.51748e-15	2.49636e-14	ENSG00000148290.10_SURF1	up	YES
3301.45	0.244912	0.0309658	7.90912	2.59215e-15	2.56823e-14	ENSG00000165688.12_PMPCA	up	YES
920.057	-0.39051	0.049437	-7.89914	2.80827e-15	2.78e-14	ENSG00000115760.14_BIRC6	down	YES
3973.74	-0.228638	0.0289856	-7.888	3.07073e-15	3.03724e-14	ENSG00000143321.19_HDGF	down	YES
721.99	0.436845	0.0554033	7.88481	3.15005e-15	3.11307e-14	ENSG00000064651.14_SLC12A2	up	YES
3060.21	0.346727	0.0440138	7.87769	3.33487e-15	3.29294e-14	ENSG00000219200.12_RNASEK	up	YES
587.673	0.476455	0.0604845	7.87732	3.34485e-15	3.30001e-14	ENSG00000076351.13_SLC46A1	up	YES
1133.3	0.348773	0.0442799	7.87655	3.36552e-15	3.31761e-14	ENSG00000177889.10_UBE2N	up	YES
1006.89	0.389423	0.0494699	7.87193	3.49218e-15	3.43957e-14	ENSG00000143543.15_JTB	up	YES
677.753	-0.444429	0.0564853	-7.86805	3.60213e-15	3.54487e-14	ENSG00000100014.20_SPECC1L	down	YES
321.416	0.631642	0.0803738	7.8588	3.87816e-15	3.81331e-14	ENSG00000102181.21_CD99L2	up	YES
644.173	0.452411	0.0575787	7.85725	3.92649e-15	3.85759e-14	ENSG00000221968.9_FADS3	up	YES
4362.88	-0.225251	0.0286684	-7.85712	3.93078e-15	3.85857e-14	ENSG00000063244.13_U2AF2	down	YES
630.969	0.449989	0.0572782	7.85621	3.95935e-15	3.88335e-14	ENSG00000105767.3_CADM4	up	YES
975.498	0.38454	0.0489818	7.85066	4.1386e-15	4.05576e-14	ENSG00000168827.15_GFM1	up	YES
593.164	0.46127	0.0587737	7.84823	4.21937e-15	4.13145e-14	ENSG00000172375.14_C2CD2L	up	YES
333.475	0.607141	0.0773795	7.84627	4.286e-15	4.19319e-14	ENSG00000205808.7_PLPP6	up	YES
246.376	0.704372	0.0897774	7.84576	4.30351e-15	4.2068e-14	ENSG00000163389.12_POGLUT1	up	YES
232.179	0.739128	0.0942091	7.84561	4.30844e-15	4.2081e-14	ENSG00000125657.5_TNFSF9	up	YES
808.01	0.40375	0.0514888	7.84151	4.45151e-15	4.34421e-14	ENSG00000137161.17_CNPY3	up	YES
546.337	-0.493041	0.0628981	-7.83873	4.55141e-15	4.43801e-14	ENSG00000082805.20_ERC1	down	YES
729.362	0.442534	0.0564747	7.83596	4.65256e-15	4.53286e-14	ENSG00000131724.11_IL13RA1	up	YES
670.346	-0.442181	0.0564414	-7.83434	4.71299e-15	4.58791e-14	ENSG00000165238.16_WNK2	down	YES
261.239	0.731651	0.0934214	7.83172	4.81236e-15	4.68075e-14	ENSG00000185475.11_TMEM179B	up	YES
671.625	0.436432	0.0557439	7.82924	4.90823e-15	4.77003e-14	ENSG00000133597.11_ADCK2	up	YES
185.108	0.821378	0.104919	7.82867	4.93053e-15	4.78773e-14	ENSG00000177058.12_SLC38A9	up	YES
2023.81	-0.327799	0.0418894	-7.82534	5.06281e-15	4.9121e-14	ENSG00000234851.4_RPL23AP42	down	YES
101.829	1.11401	0.142395	7.82338	5.14226e-15	4.98506e-14	ENSG00000196611.6_MMP1	up	YES
1534.55	0.310676	0.0397273	7.82023	5.27261e-15	5.10719e-14	ENSG00000075292.19_ZNF638	up	YES
289.301	0.66022	0.0844546	7.81746	5.39015e-15	5.21672e-14	ENSG00000132581.10_SDF2	up	YES
1061.7	-0.360357	0.0461325	-7.81136	5.65748e-15	5.47092e-14	ENSG00000076984.18_MAP2K7	down	YES
15028.2	0.173678	0.0222848	7.79356	6.51474e-15	6.29471e-14	ENSG00000170315.14_UBB	up	YES
410.339	0.564673	0.0724605	7.79284	6.55198e-15	6.32547e-14	ENSG00000180694.14_TMEM64	up	YES
1891.24	0.311029	0.0399154	7.79222	6.58438e-15	6.35151e-14	ENSG00000082153.18_BZW1	up	YES
847.268	0.433925	0.0557151	7.78829	6.79247e-15	6.54684e-14	ENSG00000014641.21_MDH1	up	YES
1628.74	0.331321	0.0425501	7.78659	6.88405e-15	6.62965e-14	ENSG00000154518.10_ATP5MC3	up	YES
1436.39	-0.330611	0.0425775	-7.76491	8.17027e-15	7.86187e-14	ENSG00000116871.16_MAP7D1	down	YES
532.279	-0.491593	0.0633466	-7.76037	8.46849e-15	8.14213e-14	ENSG00000157985.19_AGAP1	down	YES
1771.09	-0.292998	0.0377779	-7.75582	8.77746e-15	8.43227e-14	ENSG00000171988.19_JMJD1C	down	YES
206.086	0.782776	0.100971	7.75246	9.01282e-15	8.65128e-14	ENSG00000172031.7_EPHX4	up	YES
394.308	0.554927	0.0716011	7.75026	9.17053e-15	8.79544e-14	ENSG00000115902.11_SLC1A4	up	YES
504.785	0.524537	0.0676867	7.74947	9.22738e-15	8.84272e-14	ENSG00000146085.8_MMUT	up	YES
1026.77	0.368135	0.0475053	7.74935	9.23619e-15	8.84391e-14	ENSG00000189159.16_JPT1	up	YES
646.495	0.458531	0.0591725	7.74905	9.25797e-15	8.85753e-14	ENSG00000115107.20_STEAP3	up	YES
586.71	0.502998	0.0649315	7.7466	9.43868e-15	9.02304e-14	ENSG00000181929.13_PRKAG1	up	YES
1482.49	-0.322008	0.0415719	-7.74582	9.497e-15	9.07138e-14	ENSG00000164916.11_FOXK1	down	YES
1384.82	-0.340808	0.0440017	-7.74535	9.5316e-15	9.097e-14	ENSG00000197386.14_HTT	down	YES
744.78	-0.418352	0.0540351	-7.74222	9.7694e-15	9.31636e-14	ENSG00000164080.14_RAD54L2	down	YES
508.88	0.524298	0.067738	7.7401	9.93414e-15	9.46574e-14	ENSG00000101236.17_RNF24	up	YES
1278.88	-0.359671	0.0464753	-7.73897	1.00229e-14	9.54256e-14	ENSG00000071564.17_TCF3	down	YES
154.785	0.866689	0.112013	7.73737	1.01496e-14	9.65528e-14	ENSG00000050344.9_NFE2L3	up	YES
2792.34	-0.249231	0.0322243	-7.73426	1.04006e-14	9.88602e-14	ENSG00000071626.17_DAZAP1	down	YES
1378.44	0.321974	0.0416306	7.73407	1.04161e-14	9.89278e-14	ENSG00000101194.18_SLC17A9	up	YES
1058.47	-0.408593	0.052859	-7.72986	1.07663e-14	1.0217e-13	ENSG00000131503.21_ANKHD1	down	YES
429.198	0.561807	0.0726837	7.72948	1.0799e-14	1.02398e-13	ENSG00000118600.12_RXYLT1	up	YES
2415.92	-0.267212	0.034579	-7.72757	1.09616e-14	1.03855e-13	ENSG00000196396.10_PTPN1	down	YES
770.836	0.401225	0.0519238	7.72719	1.09943e-14	1.04041e-13	ENSG00000080189.15_SLC35C2	up	YES
716.723	0.433009	0.0560375	7.72714	1.09989e-14	1.04041e-13	ENSG00000164031.17_DNAJB14	up	YES
305.722	0.647609	0.0838531	7.72313	1.13507e-14	1.07281e-13	ENSG00000141540.11_TTYH2	up	YES
877.427	-0.39708	0.0514381	-7.71957	1.16725e-14	1.10234e-13	ENSG00000106683.15_LIMK1	down	YES
643.297	0.443119	0.0574083	7.71872	1.17502e-14	1.10878e-13	ENSG00000170088.14_TMEM192	up	YES
559.226	0.493115	0.0639127	7.71545	1.20559e-14	1.1358e-13	ENSG00000033867.16_SLC4A7	up	YES
5665.25	-0.19788	0.0256471	-7.71551	1.20502e-14	1.1358e-13	ENSG00000189403.15_HMGB1	down	YES
1053.81	-0.36151	0.0468651	-7.71384	1.22088e-14	1.14928e-13	ENSG00000149115.14_TNKS1BP1	down	YES
882.13	0.383643	0.0497555	7.71057	1.25261e-14	1.17819e-13	ENSG00000104325.7_DECR1	up	YES
783.711	0.411496	0.053401	7.70577	1.30061e-14	1.22237e-13	ENSG00000088836.14_SLC4A11	up	YES
10245.5	0.175813	0.0228282	7.70157	1.34403e-14	1.26216e-13	ENSG00000142937.12_RPS8	up	YES
2822.98	0.247564	0.032162	7.6974	1.38867e-14	1.30303e-13	ENSG00000198918.8_RPL39	up	YES
6539.87	-0.213788	0.0277885	-7.69343	1.43246e-14	1.34305e-13	ENSG00000167460.17_TPM4	down	YES
946.903	-0.380253	0.0494265	-7.6933	1.43389e-14	1.34331e-13	ENSG00000188554.15_NBR1	down	YES
10061.6	-0.208417	0.0271242	-7.6838	1.54435e-14	1.44563e-13	ENSG00000119335.17_SET	down	YES
374.137	0.583431	0.0759714	7.67962	1.59557e-14	1.49239e-13	ENSG00000215712.11_TMEM242	up	YES
1550.94	-0.304516	0.0397019	-7.67006	1.71911e-14	1.60665e-13	ENSG00000159692.16_CTBP1	down	YES
1364.72	-0.327645	0.0427654	-7.66145	1.83848e-14	1.71685e-13	ENSG00000141905.19_NFIC	down	YES
358.35	0.586839	0.076606	7.66049	1.85231e-14	1.72838e-13	ENSG00000133027.18_PEMT	up	YES
1071.5	0.351037	0.0458333	7.659	1.87387e-14	1.74711e-13	ENSG00000138035.15_PNPT1	up	YES
5705.82	-0.216638	0.0283074	-7.65306	1.96254e-14	1.82832e-13	ENSG00000167522.16_ANKRD11	down	YES
213.248	0.757463	0.0991004	7.64339	2.11573e-14	1.96947e-13	ENSG00000132196.16_HSD17B7	up	YES
4209.85	-0.225998	0.029579	-7.64049	2.16393e-14	2.01273e-13	ENSG00000106211.10_HSPB1	down	YES
131.663	0.97453	0.127557	7.63993	2.17335e-14	2.01988e-13	ENSG00000116815.16_CD58	up	YES
895.337	0.372478	0.0488016	7.63251	2.30235e-14	2.13808e-13	ENSG00000198663.17_C6orf89	up	YES
1609.83	-0.308888	0.0405331	-7.62065	2.52402e-14	2.34208e-13	ENSG00000165733.8_BMS1	down	YES
448.162	-0.532952	0.0699467	-7.6194	2.5486e-14	2.36301e-13	ENSG00000031081.11_ARHGAP31	down	YES
756.819	0.412481	0.0541613	7.61578	2.62101e-14	2.42822e-13	ENSG00000197818.12_SLC9A8	up	YES
250.35	0.670583	0.0880541	7.61557	2.62522e-14	2.4302e-13	ENSG00000196639.7_HRH1	up	YES
857.475	0.398007	0.0522657	7.61507	2.63541e-14	2.4377e-13	ENSG00000140688.17_RUSF1	up	YES
3887.53	-0.241837	0.0317804	-7.60962	2.74896e-14	2.54072e-13	ENSG00000089159.17_PXN	down	YES
524.749	0.479914	0.0630911	7.60667	2.81242e-14	2.59733e-13	ENSG00000028203.18_VEZT	up	YES
2098.98	-0.268394	0.0352859	-7.60628	2.82106e-14	2.60325e-13	ENSG00000107290.14_SETX	down	YES
3658.74	0.2277	0.0299437	7.60425	2.86557e-14	2.64224e-13	ENSG00000168036.18_CTNNB1	up	YES
641.41	-0.461505	0.0607946	-7.59122	3.16909e-14	2.91981e-13	ENSG00000005339.15_CREBBP	down	YES
371.867	0.550288	0.0725185	7.58824	3.24292e-14	2.98548e-13	ENSG00000153933.10_DGKE	up	YES
2674.31	-0.243715	0.0321432	-7.58215	3.3988e-14	3.12545e-13	ENSG00000002834.18_LASP1	down	YES
1996.29	-0.330278	0.0435603	-7.58209	3.4003e-14	3.12545e-13	ENSG00000214753.4_HNRNPUL2	down	YES
783.586	0.426407	0.0562399	7.58192	3.40468e-14	3.12701e-13	ENSG00000143252.16_SDHC	up	YES
151.81	0.864767	0.114158	7.57518	3.58634e-14	3.29127e-13	ENSG00000038002.9_AGA	up	YES
661.292	0.429782	0.0567834	7.5688	3.76691e-14	3.45428e-13	ENSG00000136261.15_BZW2	up	YES
937.357	-0.374281	0.0494604	-7.56729	3.81095e-14	3.49193e-13	ENSG00000111737.12_RAB35	down	YES
630.948	0.436556	0.0576975	7.56628	3.84054e-14	3.51629e-13	ENSG00000152894.15_PTPRK	up	YES
745.658	0.417328	0.0551858	7.56224	3.96181e-14	3.62448e-13	ENSG00000155254.13_MARVELD1	up	YES
645.982	-0.451199	0.0596662	-7.56206	3.96741e-14	3.62677e-13	ENSG00000171316.12_CHD7	down	YES
528.231	0.464614	0.0614967	7.55512	4.1849e-14	3.8226e-13	ENSG00000167543.16_TP53I13	up	YES
10717.2	-0.192608	0.0254941	-7.55501	4.18825e-14	3.82268e-13	ENSG00000136068.16_FLNB	down	YES
114.561	0.99151	0.131311	7.55086	4.32379e-14	3.94331e-13	ENSG00000100196.11_KDELR3	up	YES
419.7	0.522425	0.0692061	7.54883	4.39184e-14	4.00225e-13	ENSG00000090776.6_EFNB1	up	YES
530.72	0.46359	0.0614974	7.53837	4.75877e-14	4.33326e-13	ENSG00000133935.7_ERG28	up	YES
569.906	0.459367	0.0609422	7.53774	4.78171e-14	4.35076e-13	ENSG00000141429.14_GALNT1	up	YES
725.833	-0.434573	0.0576755	-7.53479	4.89122e-14	4.44694e-13	ENSG00000150760.13_DOCK1	down	YES
1485.32	-0.313147	0.0415929	-7.52886	5.11858e-14	4.65004e-13	ENSG00000204590.13_GNL1	down	YES
1138.76	0.416193	0.0553166	7.52383	5.31954e-14	4.82885e-13	ENSG00000125870.11_SNRPB2	up	YES
845.582	-0.408599	0.0543627	-7.51617	5.64025e-14	5.1149e-13	ENSG00000099991.18_CABIN1	down	YES
1509.01	0.30192	0.0401697	7.5161	5.64339e-14	5.1149e-13	ENSG00000231925.12_TAPBP	up	YES
3122.35	-0.237283	0.0315853	-7.51244	5.80359e-14	5.25602e-13	ENSG00000177731.16_FLII	down	YES
277.867	-0.632312	0.084189	-7.51063	5.88442e-14	5.32511e-13	ENSG00000109265.15_CRACD	down	YES
227.545	0.693157	0.0923163	7.5085	5.98069e-14	5.40464e-13	ENSG00000011198.10_ABHD5	up	YES
370.081	0.561246	0.0747482	7.50849	5.98155e-14	5.40464e-13	ENSG00000168778.13_TCTN2	up	YES
486.194	0.479548	0.0638852	7.5064	6.07755e-14	5.48715e-13	ENSG00000130733.11_YIPF2	up	YES
1113.74	0.36418	0.0485289	7.5044	6.17107e-14	5.56728e-13	ENSG00000166224.17_SGPL1	up	YES
237.09	0.703861	0.0937951	7.50423	6.17884e-14	5.57e-13	ENSG00000144959.11_NCEH1	up	YES
353.107	0.566591	0.0755401	7.50054	6.35559e-14	5.72492e-13	ENSG00000102595.20_UGGT2	up	YES
530.475	-0.465962	0.0621274	-7.5001	6.37676e-14	5.73957e-13	ENSG00000011454.18_RABGAP1	down	YES
5120.7	-0.216983	0.0289388	-7.498	6.48011e-14	5.82811e-13	ENSG00000197451.12_HNRNPAB	down	YES
9975.5	-0.274334	0.0365888	-7.49776	6.49162e-14	5.83398e-13	ENSG00000167978.17_SRRM2	down	YES
904.529	0.366816	0.0489431	7.49476	6.64217e-14	5.9647e-13	ENSG00000127564.17_PKMYT1	up	YES
3013.34	-0.232164	0.0309986	-7.48952	6.91284e-14	6.203e-13	ENSG00000196739.15_COL27A1	down	YES
288.474	0.633848	0.0846335	7.48933	6.92278e-14	6.20716e-13	ENSG00000178980.15_SELENOW	up	YES
1307.16	-0.327355	0.0437255	-7.48659	7.06873e-14	6.33317e-13	ENSG00000177732.9_SOX12	down	YES
1056.41	0.349244	0.0466558	7.48554	7.12552e-14	6.37429e-13	ENSG00000100242.15_SUN2	up	YES
256.159	0.656858	0.0877492	7.48563	7.1207e-14	6.37429e-13	ENSG00000133195.11_SLC39A11	up	YES
337.584	0.570083	0.0761632	7.48501	7.1539e-14	6.39479e-13	ENSG00000109689.19_STIM2	up	YES
1801.46	0.294124	0.0393182	7.48061	7.39758e-14	6.60756e-13	ENSG00000164054.16_SHISA5	up	YES
1319.21	0.320459	0.0428439	7.47971	7.44893e-14	6.64328e-13	ENSG00000117298.16_ECE1	up	YES
2274.84	0.716716	0.0958207	7.47976	7.44562e-14	6.64328e-13	ENSG00000163584.18_RPL22L1	up	YES
3472.47	0.243915	0.0326233	7.4767	7.62098e-14	6.79155e-13	ENSG00000134308.14_YWHAQ	up	YES
1073.09	0.341568	0.0457254	7.46998	8.0206e-14	7.14224e-13	ENSG00000164828.18_SUN1	up	YES
2285	-0.285719	0.0382646	-7.46694	8.20808e-14	7.30363e-13	ENSG00000205937.12_RNPS1	down	YES
373.875	0.542216	0.0726214	7.46634	8.24556e-14	7.3314e-13	ENSG00000196352.16_CD55	up	YES
388.842	0.55188	0.0739286	7.46504	8.32736e-14	7.39852e-13	ENSG00000131174.7_COX7B	up	YES
230.967	0.69412	0.0930818	7.4571	8.84508e-14	7.85252e-13	ENSG00000131015.5_ULBP2	up	YES
1409.59	-0.309451	0.0415275	-7.45171	9.2139e-14	8.17375e-13	ENSG00000047849.22_MAP4	down	YES
393.246	-0.53253	0.0715143	-7.44648	9.58636e-14	8.49773e-13	ENSG00000105357.19_MYH14	down	YES
128.25	0.912295	0.122683	7.4362	1.03622e-13	9.17851e-13	ENSG00000136867.11_SLC31A2	up	YES
560.589	0.469313	0.0631242	7.43476	1.04755e-13	9.27189e-13	ENSG00000087111.21_PIGS	up	YES
598.568	0.443569	0.0596657	7.43423	1.05177e-13	9.30213e-13	ENSG00000144320.14_LNPK	up	YES
437.341	0.50268	0.0676323	7.43254	1.06533e-13	9.41494e-13	ENSG00000155755.19_TMEM237	up	YES
878.389	-0.381984	0.0513992	-7.4317	1.07213e-13	9.46794e-13	ENSG00000160551.12_TAOK1	down	YES
738.782	0.418012	0.0562556	7.43057	1.08128e-13	9.54155e-13	ENSG00000170502.13_NUDT9	up	YES
424.007	0.521334	0.0701656	7.43005	1.0856e-13	9.57239e-13	ENSG00000134480.16_CCNH	up	YES
556.48	0.482706	0.0649705	7.42961	1.08916e-13	9.59659e-13	ENSG00000070961.16_ATP2B1	up	YES
134.819	0.973038	0.130972	7.42933	1.09145e-13	9.60954e-13	ENSG00000250644.3_RP11-295K3.1	up	YES
408.661	0.558269	0.075145	7.42923	1.09236e-13	9.61026e-13	ENSG00000137522.18_RNF121	up	YES
576.834	0.445892	0.0600373	7.42691	1.11165e-13	9.77266e-13	ENSG00000167695.15_TLCD3A	up	YES
593.676	0.438501	0.0590561	7.42516	1.12643e-13	9.89519e-13	ENSG00000071189.21_SNX13	up	YES
686.046	-0.443307	0.0597693	-7.41696	1.19837e-13	1.05192e-12	ENSG00000157657.14_ZNF618	down	YES
7197.69	-0.248663	0.0336252	-7.39512	1.41277e-13	1.23919e-12	ENSG00000107581.13_EIF3A	down	YES
1000.47	0.350583	0.0474125	7.39431	1.42148e-13	1.2459e-12	ENSG00000110811.20_P3H3	up	YES
652.478	-0.42209	0.057117	-7.38992	1.46915e-13	1.28672e-12	ENSG00000011405.13_PIK3C2A	down	YES
832.537	0.370577	0.050171	7.38629	1.5098e-13	1.32133e-12	ENSG00000058063.16_ATP11B	up	YES
385.962	0.529613	0.0717577	7.38057	1.57613e-13	1.37835e-12	ENSG00000138463.9_SLC49A4	up	YES
152.694	0.873657	0.118444	7.37614	1.62943e-13	1.4239e-12	ENSG00000067113.17_PLPP1	up	YES
760.669	-0.397667	0.0539173	-7.37551	1.63722e-13	1.42964e-12	ENSG00000006712.15_PAF1	down	YES
598.397	-0.444371	0.0602888	-7.37071	1.69727e-13	1.48097e-12	ENSG00000127946.17_HIP1	down	YES
294.928	0.624364	0.0848219	7.36087	1.82711e-13	1.59307e-12	ENSG00000269556.8_TMEM185A	up	YES
745.306	0.426829	0.0580053	7.35845	1.86058e-13	1.62105e-12	ENSG00000107833.10_NPM3	up	YES
638.705	0.470054	0.0639156	7.35429	1.91944e-13	1.67108e-12	ENSG00000143653.10_SCCPDH	up	YES
250.09	0.646815	0.0879852	7.35141	1.96124e-13	1.70621e-12	ENSG00000177917.11_ARL6IP6	up	YES
514.768	-0.472399	0.0642784	-7.34927	1.99291e-13	1.73247e-12	ENSG00000112379.9_ARFGEF3	down	YES
2135.67	-0.264863	0.0360772	-7.34156	2.11123e-13	1.83396e-12	ENSG00000146112.12_PPP1R18	down	YES
1080.77	0.337939	0.0460631	7.33645	2.19335e-13	1.90388e-12	ENSG00000116199.12_FAM20B	up	YES
525.757	0.463582	0.0632001	7.33514	2.21493e-13	1.9212e-12	ENSG00000119953.14_SMNDC1	up	YES
1305.88	0.329695	0.0449511	7.33454	2.22485e-13	1.92837e-12	ENSG00000125868.16_DSTN	up	YES
1173.94	0.323091	0.0440682	7.3316	2.27416e-13	1.96965e-12	ENSG00000103042.9_SLC38A7	up	YES
36.9574	1.80026	0.245774	7.32483	2.39201e-13	2.07019e-12	ENSG00000168952.15_STXBP6	up	YES
533.978	0.459788	0.0628105	7.32023	2.4754e-13	2.14077e-12	ENSG00000112414.15_ADGRG6	up	YES
1087.92	0.345679	0.0472302	7.31903	2.49764e-13	2.15841e-12	ENSG00000161091.14_MFSD12	up	YES
735.443	-0.396388	0.0541787	-7.31631	2.5489e-13	2.20108e-12	ENSG00000112851.15_ERBIN	down	YES
1145.46	-0.332871	0.0455127	-7.31381	2.59679e-13	2.24078e-12	ENSG00000259956.2_RBM15B	down	YES
1225.35	0.313638	0.0428927	7.31214	2.62914e-13	2.26703e-12	ENSG00000085998.14_POMGNT1	up	YES
404.479	0.514874	0.070472	7.30608	2.75054e-13	2.36996e-12	ENSG00000171492.14_LRRC8D	up	YES
76.9777	1.20622	0.165156	7.30351	2.80353e-13	2.41384e-12	ENSG00000172339.10_ALG14	up	YES
3947.61	-0.2639	0.0361357	-7.30303	2.81367e-13	2.42079e-12	ENSG00000187678.10_SPRY4	down	YES
166.244	0.872859	0.119527	7.30259	2.82277e-13	2.42684e-12	ENSG00000227617.9_CERS6-AS1	up	YES
643.072	0.470177	0.0644007	7.30081	2.86042e-13	2.4574e-12	ENSG00000135940.7_COX5B	up	YES
94.9278	1.09331	0.149817	7.29768	2.9277e-13	2.51335e-12	ENSG00000178031.18_ADAMTSL1	up	YES
11679.5	0.250987	0.0344027	7.29556	2.97424e-13	2.55144e-12	ENSG00000147403.18_RPL10	up	YES
236.143	0.670185	0.0919397	7.28941	3.11325e-13	2.66873e-12	ENSG00000152078.10_TLCD4	up	YES
310.03	0.595609	0.0817835	7.28276	3.27065e-13	2.8016e-12	ENSG00000182093.16_GET1	up	YES
4965.34	0.205796	0.0282795	7.27721	3.40786e-13	2.917e-12	ENSG00000198911.12_SREBF2	up	YES
11548.9	0.406441	0.0558854	7.27275	3.52252e-13	3.01085e-12	ENSG00000063177.13_RPL18	up	YES
32.8435	1.92642	0.264882	7.27274	3.52265e-13	3.01085e-12	ENSG00000125398.8_SOX9	up	YES
2928.8	0.246233	0.0338925	7.2651	3.7275e-13	3.18361e-12	ENSG00000171603.18_CLSTN1	up	YES
1396.24	-0.29612	0.0407769	-7.26196	3.81529e-13	3.25621e-12	ENSG00000148296.7_SURF6	down	YES
811.706	0.386401	0.0532421	7.25743	3.94527e-13	3.3647e-12	ENSG00000110841.14_PPFIBP1	up	YES
360.554	0.53517	0.0737543	7.25612	3.98349e-13	3.39481e-12	ENSG00000185344.15_ATP6V0A2	up	YES
144.683	0.847278	0.116814	7.25323	4.06956e-13	3.46564e-12	ENSG00000139133.7_ALG10	up	YES
992.238	0.33761	0.0465559	7.25171	4.11552e-13	3.50223e-12	ENSG00000008513.16_ST3GAL1	up	YES
1058.23	0.330432	0.0455682	7.25138	4.12548e-13	3.50815e-12	ENSG00000052841.15_TTC17	up	YES
3903.83	-0.245415	0.0338451	-7.25112	4.13342e-13	3.51235e-12	ENSG00000159140.21_SON	down	YES
325.927	0.581675	0.0802928	7.24442	4.34305e-13	3.68781e-12	ENSG00000183605.17_SFXN4	up	YES
711.27	0.392202	0.0541434	7.24375	4.36448e-13	3.70332e-12	ENSG00000069482.7_GAL	up	YES
648.778	0.422249	0.0582929	7.24358	4.3699e-13	3.70523e-12	ENSG00000253710.5_ALG11	up	YES
785.017	-0.397836	0.0549282	-7.24284	4.39391e-13	3.72289e-12	ENSG00000108557.19_RAI1	down	YES
755.263	0.382636	0.0529146	7.23121	4.78707e-13	4.05307e-12	ENSG00000135956.9_TMEM127	up	YES
634.635	0.419927	0.0580953	7.22823	4.89319e-13	4.13993e-12	ENSG00000184500.16_PROS1	up	YES
673.813	-0.441907	0.0611714	-7.22408	5.04496e-13	4.26525e-12	ENSG00000197312.12_DDI2	down	YES
872.382	-0.360096	0.0498799	-7.21926	5.22727e-13	4.41619e-12	ENSG00000160271.16_RALGDS	down	YES
1455.01	-0.310248	0.0429787	-7.21866	5.25006e-13	4.43225e-12	ENSG00000167491.18_GATAD2A	down	YES
16423.3	-0.151665	0.0210245	-7.21372	5.44454e-13	4.59312e-12	ENSG00000132507.18_EIF5A	down	YES
648.503	0.407014	0.0565197	7.20127	5.96528e-13	5.0288e-12	ENSG00000151779.13_NBAS	up	YES
1191.72	0.339367	0.04714	7.19913	6.05974e-13	5.10475e-12	ENSG00000164919.11_COX6C	up	YES
838.545	-0.365677	0.0508089	-7.19711	6.15007e-13	5.17712e-12	ENSG00000167470.13_MIDN	down	YES
620.233	0.423296	0.0588217	7.19626	6.18853e-13	5.20575e-12	ENSG00000114423.23_CBLB	up	YES
1508.87	0.303757	0.0422256	7.19367	6.3071e-13	5.30168e-12	ENSG00000167283.8_ATP5MG	up	YES
332.541	0.561872	0.0781861	7.18634	6.65507e-13	5.59016e-12	ENSG00000174165.8_ZDHHC24	up	YES
444.138	-0.487515	0.067851	-7.18508	6.71701e-13	5.63814e-12	ENSG00000198435.4_NRARP	down	YES
1190.76	-0.331783	0.0461811	-7.1844	6.75035e-13	5.66207e-12	ENSG00000168137.19_SETD5	down	YES
486.21	0.468328	0.0651991	7.18304	6.81774e-13	5.71449e-12	ENSG00000164023.14_SGMS2	up	YES
3265	-0.228936	0.0318739	-7.18256	6.8416e-13	5.73039e-12	ENSG00000092201.10_SUPT16H	down	YES
234.462	0.667185	0.092958	7.17727	7.11184e-13	5.95248e-12	ENSG00000168528.12_SERINC2	up	YES
234.362	0.667295	0.0929894	7.17603	7.17639e-13	6.00221e-12	ENSG00000149591.17_TAGLN	up	YES
1072.81	-0.334574	0.0466626	-7.17007	7.49581e-13	6.26489e-12	ENSG00000104067.17_TJP1	down	YES
797.304	-0.419264	0.0585633	-7.15915	8.11762e-13	6.77867e-12	ENSG00000115464.15_USP34	down	YES
376.739	0.515028	0.0719405	7.15908	8.12212e-13	6.77867e-12	ENSG00000166575.17_TMEM135	up	YES
881.709	0.352156	0.0491925	7.15872	8.14325e-13	6.79146e-12	ENSG00000154305.18_MIA3	up	YES
230.789	0.661539	0.092418	7.15812	8.17908e-13	6.81648e-12	ENSG00000120925.16_RNF170	up	YES
2975.69	0.227934	0.0318479	7.15696	8.24844e-13	6.86939e-12	ENSG00000120438.12_TCP1	up	YES
576.057	-0.428702	0.059915	-7.15516	8.35734e-13	6.95514e-12	ENSG00000166900.17_STX3	down	YES
307.275	-0.580482	0.0811683	-7.15158	8.57845e-13	7.13408e-12	ENSG00000135525.19_MAP7	down	YES
327.654	0.554097	0.0775476	7.14524	8.98357e-13	7.46568e-12	ENSG00000163728.11_TTC14	up	YES
274.105	0.600778	0.0841365	7.14052	9.29784e-13	7.72136e-12	ENSG00000115486.12_GGCX	up	YES
1175.87	0.311409	0.0436245	7.13841	9.44168e-13	7.83526e-12	ENSG00000174886.14_NDUFA11	up	YES
949.497	0.372191	0.0521981	7.13034	1.00121e-12	8.30271e-12	ENSG00000181061.14_HIGD1A	up	YES
428.632	0.515959	0.0724063	7.12588	1.03416e-12	8.56987e-12	ENSG00000159199.14_ATP5MC1	up	YES
797.212	0.389882	0.054726	7.12427	1.04637e-12	8.66492e-12	ENSG00000054148.18_PHPT1	up	YES
1747.39	-0.271704	0.0381697	-7.11831	1.09259e-12	9.04129e-12	ENSG00000108468.15_CBX1	down	YES
353.18	0.547206	0.0768867	7.11704	1.10266e-12	9.11819e-12	ENSG00000169241.19_SLC50A1	up	YES
1294.32	-0.307193	0.0431645	-7.11681	1.10455e-12	9.1274e-12	ENSG00000122965.11_RBM19	down	YES
309.477	0.576045	0.0809854	7.11294	1.13593e-12	9.38007e-12	ENSG00000157214.14_STEAP2	up	YES
8546.14	-0.179028	0.0251727	-7.11199	1.14383e-12	9.43862e-12	ENSG00000162909.18_CAPN2	down	YES
1358.36	0.302646	0.0425928	7.10556	1.19838e-12	9.88177e-12	ENSG00000134057.15_CCNB1	up	YES
1262.8	0.311508	0.0438636	7.10175	1.2319e-12	1.01511e-11	ENSG00000067141.17_NEO1	up	YES
1213.07	0.316298	0.0445472	7.10028	1.245e-12	1.02518e-11	ENSG00000006118.15_TMEM132A	up	YES
271.682	0.612624	0.0863041	7.09844	1.26174e-12	1.03823e-11	ENSG00000011478.13_QPCTL	up	YES
1164.81	-0.3276	0.0461678	-7.09585	1.28557e-12	1.05709e-11	ENSG00000118482.12_PHF3	down	YES
2743.62	0.242561	0.0341905	7.0944	1.29909e-12	1.06747e-11	ENSG00000140264.21_SERF2	up	YES
215.447	0.67023	0.0945681	7.08727	1.36781e-12	1.12314e-11	ENSG00000151093.8_OXSM	up	YES
399.053	0.498661	0.0703725	7.08602	1.38024e-12	1.13256e-11	ENSG00000090674.16_MCOLN1	up	YES
206.258	0.718993	0.101502	7.08357	1.40486e-12	1.15194e-11	ENSG00000164414.18_SLC35A1	up	YES
391.09	0.509258	0.0719522	7.07773	1.46537e-12	1.20072e-11	ENSG00000158158.12_CNNM4	up	YES
1065.4	0.331827	0.046909	7.07385	1.50691e-12	1.23389e-11	ENSG00000041802.11_LSG1	up	YES
962.425	-0.352559	0.0498467	-7.07287	1.51758e-12	1.24177e-11	ENSG00000114439.19_BBX	down	YES
852.606	0.355532	0.0502761	7.07158	1.53174e-12	1.2516e-11	ENSG00000135503.13_ACVR1B	up	YES
541.165	-0.460556	0.0651276	-7.07159	1.53165e-12	1.2516e-11	ENSG00000140548.10_ZNF710	down	YES
1089.77	0.338086	0.0478234	7.06948	1.55517e-12	1.26985e-11	ENSG00000116459.11_ATP5PB	up	YES
1730.06	0.27165	0.038468	7.06172	1.64453e-12	1.34189e-11	ENSG00000175061.18_SNHG29	up	YES
341.6	0.547444	0.0775416	7.06	1.66501e-12	1.35765e-11	ENSG00000131725.14_WDR44	up	YES
4539.57	-0.199044	0.0282361	-7.04928	1.79842e-12	1.46541e-11	ENSG00000104852.15_SNRNP70	down	YES
99.1171	0.991679	0.140694	7.0485	1.80862e-12	1.4727e-11	ENSG00000138678.11_GPAT3	up	YES
1218.03	-0.304583	0.043221	-7.04711	1.82676e-12	1.48643e-11	ENSG00000182872.16_RBM10	down	YES
555.064	-0.454529	0.0645549	-7.04097	1.90903e-12	1.5523e-11	ENSG00000118193.12_KIF14	down	YES
928.258	0.365121	0.0518867	7.0369	1.96569e-12	1.59726e-11	ENSG00000158615.9_PPP1R15B	up	YES
1758.79	-0.27943	0.0397206	-7.03489	1.99425e-12	1.61934e-11	ENSG00000184428.13_TOP1MT	down	YES
3694.41	0.221383	0.0314702	7.03467	1.9974e-12	1.62077e-11	ENSG00000182087.14_TMEM259	up	YES
621.638	0.41814	0.0594916	7.02855	2.08691e-12	1.69224e-11	ENSG00000168763.16_CNNM3	up	YES
1475.03	0.295759	0.0420917	7.02654	2.11718e-12	1.71559e-11	ENSG00000134109.11_EDEM1	up	YES
1476.75	-0.280266	0.0399139	-7.02175	2.19106e-12	1.77423e-11	ENSG00000144674.16_GOLGA4	down	YES
1867.52	0.26091	0.0371681	7.01973	2.22294e-12	1.7988e-11	ENSG00000144224.17_UBXN4	up	YES
1022.33	-0.336723	0.0480305	-7.01061	2.37274e-12	1.91869e-11	ENSG00000017797.13_RALBP1	down	YES
275.873	0.607391	0.0866789	7.00737	2.42833e-12	1.96228e-11	ENSG00000139291.14_TMEM19	up	YES
394.956	0.494285	0.0705492	7.00625	2.44797e-12	1.97679e-11	ENSG00000160404.18_TOR2A	up	YES
331.432	0.553134	0.0789587	7.00535	2.46362e-12	1.98806e-11	ENSG00000164181.14_ELOVL7	up	YES
3020.39	-0.231718	0.0330917	-7.00232	2.5175e-12	2.03013e-11	ENSG00000100401.20_RANGAP1	down	YES
1008.74	0.331834	0.0474268	6.99675	2.61964e-12	2.11105e-11	ENSG00000127526.15_SLC35E1	up	YES
1737.95	-0.27964	0.0400269	-6.9863	2.82236e-12	2.27128e-11	ENSG00000087269.16_NOP14	down	YES
1548.79	-0.276859	0.0396286	-6.98633	2.82162e-12	2.27128e-11	ENSG00000125651.14_GTF2F1	down	YES
286.384	0.573334	0.0821541	6.97876	2.97792e-12	2.39482e-11	ENSG00000099999.15_RNF215	up	YES
5841.51	-0.197857	0.0283552	-6.9778	2.99842e-12	2.40965e-11	ENSG00000071082.11_RPL31	down	YES
416.966	-0.483906	0.0693664	-6.97609	3.03513e-12	2.43748e-11	ENSG00000170776.22_AKAP13	down	YES
981.271	-0.327557	0.0469591	-6.97537	3.05067e-12	2.44828e-11	ENSG00000076382.17_SPAG5	down	YES
686.048	-0.393066	0.0563649	-6.97359	3.0895e-12	2.47774e-11	ENSG00000171223.6_JUNB	down	YES
1956.61	0.257145	0.0368938	6.96988	3.17207e-12	2.54222e-11	ENSG00000179091.5_CYC1	up	YES
3588.99	-0.242239	0.0347616	-6.96858	3.20156e-12	2.5641e-11	ENSG00000072501.19_SMC1A	down	YES
1257.16	0.304988	0.0438008	6.96307	3.32928e-12	2.66456e-11	ENSG00000042753.12_AP2S1	up	YES
172.824	0.735111	0.105635	6.959	3.42699e-12	2.74089e-11	ENSG00000104213.13_PDGFRL	up	YES
244.584	0.633839	0.0910872	6.9586	3.43663e-12	2.74672e-11	ENSG00000138744.16_NAAA	up	YES
822.969	0.364327	0.0523656	6.95737	3.46683e-12	2.76897e-11	ENSG00000142687.18_KIAA0319L	up	YES
1578.94	0.279676	0.0402011	6.95694	3.47755e-12	2.77564e-11	ENSG00000167972.14_ABCA3	up	YES
2319.57	-0.253805	0.0364903	-6.95543	3.51491e-12	2.80354e-11	ENSG00000142208.18_AKT1	down	YES
265.378	0.603908	0.0868286	6.95518	3.5212e-12	2.80665e-11	ENSG00000160446.19_ZDHHC12	up	YES
251.126	0.630313	0.0906701	6.95171	3.60875e-12	2.87447e-11	ENSG00000134824.14_FADS2	up	YES
3040.24	-0.235699	0.0339103	-6.95066	3.63573e-12	2.89399e-11	ENSG00000136997.21_MYC	down	YES
1253.37	-0.299327	0.0430665	-6.95035	3.64372e-12	2.89838e-11	ENSG00000130382.9_MLLT1	down	YES
379.799	-0.50492	0.072658	-6.94927	3.67187e-12	2.91879e-11	ENSG00000241749.4_RPSAP52	down	YES
2125.87	-0.304438	0.0438211	-6.94729	3.72371e-12	2.95799e-11	ENSG00000264364.3_DYNLL2	down	YES
1152.65	0.304403	0.043884	6.93655	4.01798e-12	3.18957e-11	ENSG00000143106.13_PSMA5	up	YES
763.515	-0.373217	0.0538099	-6.93583	4.03839e-12	3.2036e-11	ENSG00000115756.13_HPCAL1	down	YES
1454.05	-0.296985	0.0428295	-6.93414	4.08704e-12	3.24e-11	ENSG00000136819.15_C9orf78	down	YES
774.515	-0.391549	0.0564883	-6.93151	4.16383e-12	3.29865e-11	ENSG00000111752.11_PHC1	down	YES
4195.22	-0.224804	0.0324441	-6.92897	4.23925e-12	3.35612e-11	ENSG00000130816.17_DNMT1	down	YES
1574.83	0.280945	0.0405646	6.92587	4.33312e-12	3.42811e-11	ENSG00000083720.13_OXCT1	up	YES
1295.02	-0.293661	0.0424523	-6.91742	4.59939e-12	3.63632e-11	ENSG00000137337.15_MDC1	down	YES
901.714	-0.353035	0.0510523	-6.91517	4.67313e-12	3.69212e-11	ENSG00000197535.15_MYO5A	down	YES
808.741	0.396407	0.0573287	6.91463	4.69079e-12	3.70357e-11	ENSG00000173207.13_CKS1B	up	YES
714.624	0.375701	0.0543389	6.91402	4.71097e-12	3.717e-11	ENSG00000075336.12_TIMM21	up	YES
266.476	0.594089	0.085945	6.91244	4.764e-12	3.75631e-11	ENSG00000135845.10_PIGC	up	YES
2530.15	0.254076	0.0367585	6.91204	4.77717e-12	3.76415e-11	ENSG00000161547.17_SRSF2	up	YES
196.228	0.699407	0.101197	6.91136	4.80041e-12	3.77992e-11	ENSG00000197646.8_PDCD1LG2	up	YES
1149.7	0.323294	0.0468023	6.90766	4.92698e-12	3.87697e-11	ENSG00000157637.13_SLC38A10	up	YES
2490.51	-0.252457	0.0365489	-6.90738	4.93703e-12	3.88227e-11	ENSG00000100591.8_AHSA1	down	YES
872.363	-0.344107	0.0498447	-6.90358	5.07083e-12	3.98481e-11	ENSG00000103994.18_ZNF106	down	YES
640.998	-0.395012	0.0572283	-6.90239	5.11343e-12	4.01559e-11	ENSG00000100226.16_GTPBP1	down	YES
551.387	0.426517	0.0618052	6.90099	5.16411e-12	4.05267e-11	ENSG00000163866.9_SMIM12	up	YES
660.263	-0.403749	0.0585567	-6.895	5.38633e-12	4.22422e-11	ENSG00000133142.18_TCEAL4	down	YES
1352.95	0.302042	0.0438363	6.89022	5.57069e-12	4.36589e-11	ENSG00000269378.1_ITGB1P1	up	YES
369.935	-0.536895	0.0779319	-6.88929	5.60712e-12	4.39149e-11	ENSG00000015133.19_CCDC88C	down	YES
765.138	0.373344	0.0542006	6.88819	5.65087e-12	4.42149e-11	ENSG00000125995.16_ROMO1	up	YES
387.147	0.538922	0.0782392	6.88813	5.65298e-12	4.42149e-11	ENSG00000204370.13_SDHD	up	YES
337.856	0.535628	0.0777954	6.88508	5.77558e-12	4.51437e-11	ENSG00000163281.12_GNPDA2	up	YES
751.33	-0.365325	0.0530662	-6.88433	5.80582e-12	4.53498e-11	ENSG00000141252.21_VPS53	down	YES
160.511	-0.798088	0.11594	-6.88364	5.83428e-12	4.55416e-11	ENSG00000223459.6_TCAF1P1	down	YES
669.809	0.390057	0.0567286	6.87584	6.16277e-12	4.80737e-11	ENSG00000141012.13_GALNS	up	YES
1047.91	-0.323765	0.0471312	-6.86945	6.44512e-12	5.02427e-11	ENSG00000070047.13_PHRF1	down	YES
2781.97	0.299366	0.0436293	6.86159	6.80986e-12	5.30507e-11	ENSG00000100632.11_ERH	up	YES
118.643	0.939214	0.136883	6.86144	6.81702e-12	5.30712e-11	ENSG00000168000.16_BSCL2	up	YES
2891.85	0.215986	0.0314794	6.86118	6.82957e-12	5.31335e-11	ENSG00000156261.13_CCT8	up	YES
1460.68	0.274982	0.0400812	6.86062	6.85617e-12	5.3305e-11	ENSG00000138363.15_ATIC	up	YES
192.801	0.688595	0.100395	6.85888	6.9401e-12	5.39217e-11	ENSG00000171202.7_TMEM126A	up	YES
1502.43	0.290413	0.0423563	6.85642	7.06075e-12	5.48227e-11	ENSG00000180817.12_PPA1	up	YES
334.755	0.585533	0.0854035	6.85608	7.07752e-12	5.49165e-11	ENSG00000167536.14_DHRS13	up	YES
875.679	-0.355052	0.0518583	-6.84658	7.5639e-12	5.86515e-11	ENSG00000154380.17_ENAH	down	YES
271.697	0.577013	0.0842787	6.84648	7.56895e-12	5.86519e-11	ENSG00000119899.13_SLC17A5	up	YES
2102.53	0.26265	0.0384067	6.83864	7.99485e-12	6.19112e-11	ENSG00000162337.12_LRP5	up	YES
575.518	0.422585	0.0618157	6.83621	8.13167e-12	6.2929e-11	ENSG00000162885.14_B3GALNT2	up	YES
219.615	0.649053	0.0949488	6.83583	8.15318e-12	6.30538e-11	ENSG00000086619.14_ERO1B	up	YES
1046.16	0.31789	0.0465101	6.83486	8.2086e-12	6.34404e-11	ENSG00000057019.16_DCBLD2	up	YES
399.103	-0.499993	0.073167	-6.83358	8.28222e-12	6.39672e-11	ENSG00000109756.9_RAPGEF2	down	YES
321.611	0.530259	0.0777946	6.81614	9.35192e-12	7.21813e-11	ENSG00000005448.17_WDR54	up	YES
799.195	0.366472	0.0537689	6.81569	9.38108e-12	7.23586e-11	ENSG00000075142.14_SRI	up	YES
913.688	0.356346	0.0522917	6.81458	9.45412e-12	7.2874e-11	ENSG00000140931.20_CMTM3	up	YES
1142.83	-0.300109	0.0440416	-6.81422	9.47779e-12	7.30083e-11	ENSG00000112658.8_SRF	down	YES
3137.24	-0.220656	0.0323843	-6.81365	9.51511e-12	7.32476e-11	ENSG00000111615.14_KRR1	down	YES
412.99	-0.485111	0.0712188	-6.81156	9.65448e-12	7.42716e-11	ENSG00000106012.18_IQCE	down	YES
572.868	0.412221	0.060534	6.80974	9.7778e-12	7.51708e-11	ENSG00000101843.19_PSMD10	up	YES
2308.18	0.237261	0.0348517	6.80772	9.91558e-12	7.618e-11	ENSG00000135390.21_ATP5MC2	up	YES
2048.61	-0.252668	0.0371167	-6.80739	9.9386e-12	7.63068e-11	ENSG00000107130.10_NCS1	down	YES
388.61	-0.502003	0.0738619	-6.79652	1.07178e-11	8.22353e-11	ENSG00000152818.18_UTRN	down	YES
1188.64	-0.293107	0.0431668	-6.7901	1.12058e-11	8.59234e-11	ENSG00000095787.24_WAC	down	YES
95.0412	0.976879	0.143899	6.78866	1.13178e-11	8.67253e-11	ENSG00000074416.15_MGLL	up	YES
3101.66	0.208256	0.0307418	6.77436	1.24957e-11	9.56886e-11	ENSG00000107281.10_NPDC1	up	YES
672.881	-0.375485	0.0554897	-6.76676	1.31694e-11	1.00782e-10	ENSG00000118900.15_UBN1	down	YES
1424.5	-0.278912	0.0412187	-6.76665	1.318e-11	1.00797e-10	ENSG00000137776.17_SLTM	down	YES
1202.97	0.301097	0.0445427	6.75974	1.38243e-11	1.05655e-10	ENSG00000176340.4_COX8A	up	YES
12017.1	0.192552	0.0284881	6.75904	1.38914e-11	1.06099e-10	ENSG00000105372.8_RPS19	up	YES
363.962	0.510711	0.0755728	6.75787	1.40032e-11	1.06883e-10	ENSG00000136247.15_ZDHHC4	up	YES
1846.17	-0.249713	0.0369627	-6.75582	1.42031e-11	1.08338e-10	ENSG00000123064.13_DDX54	down	YES
1059.35	-0.31347	0.0465079	-6.74013	1.58247e-11	1.20628e-10	ENSG00000086015.22_MAST2	down	YES
1238.97	0.292327	0.0433942	6.73656	1.62181e-11	1.23547e-10	ENSG00000151923.18_TIAL1	up	YES
466.711	0.446565	0.0663017	6.73535	1.63535e-11	1.24497e-10	ENSG00000165389.7_SPTSSA	up	YES
584.054	0.409389	0.0607996	6.73342	1.65726e-11	1.26083e-10	ENSG00000099337.5_KCNK6	up	YES
1295.78	0.285838	0.0424636	6.73137	1.68076e-11	1.27788e-10	ENSG00000183853.18_KIRREL1	up	YES
1757.06	-0.271615	0.0403807	-6.72635	1.73969e-11	1.32183e-10	ENSG00000124486.14_USP9X	down	YES
817.534	0.350509	0.0521201	6.72503	1.75559e-11	1.33304e-10	ENSG00000164109.14_MAD2L1	up	YES
667.258	0.374354	0.0556814	6.72315	1.77832e-11	1.34943e-10	ENSG00000162298.19_SYVN1	up	YES
7824.38	-0.198446	0.0295194	-6.72255	1.78574e-11	1.35418e-10	ENSG00000096433.11_ITPR3	down	YES
134.433	0.799708	0.118997	6.72042	1.81198e-11	1.37319e-10	ENSG00000121797.10_CCRL2	up	YES
47222.8	0.244775	0.0364447	6.71635	1.8633e-11	1.41116e-10	ENSG00000198888.2_MT-ND1	up	YES
111.829	0.908187	0.135287	6.71304	1.90615e-11	1.44269e-10	ENSG00000181458.10_TMEM45A	up	YES
2091.18	0.236276	0.0352078	6.7109	1.93431e-11	1.46211e-10	ENSG00000140943.17_MBTPS1	up	YES
329.943	0.516598	0.076979	6.7109	1.93429e-11	1.46211e-10	ENSG00000158769.18_F11R	up	YES
482.439	0.443524	0.0660985	6.71004	1.94566e-11	1.46973e-10	ENSG00000175782.11_SLC35E3	up	YES
141.171	0.775932	0.115682	6.70746	1.98047e-11	1.49506e-10	ENSG00000132406.12_TMEM128	up	YES
400.853	0.473619	0.0706352	6.70514	2.01213e-11	1.51798e-10	ENSG00000103174.13_NAGPA	up	YES
644.843	-0.383394	0.0572744	-6.69398	2.1718e-11	1.63739e-10	ENSG00000167291.16_TBC1D16	down	YES
344.894	0.538197	0.080441	6.69059	2.22274e-11	1.67471e-10	ENSG00000259522.3_RP11-468E2.2	up	YES
511.203	0.419665	0.0627779	6.68491	2.31068e-11	1.73985e-10	ENSG00000141873.11_SLC39A3	up	YES
522.293	0.429537	0.0642655	6.68379	2.32845e-11	1.7521e-10	ENSG00000135622.13_SEMA4F	up	YES
905.703	0.356541	0.0533536	6.68259	2.34751e-11	1.76531e-10	ENSG00000090020.11_SLC9A1	up	YES
1779	-0.257348	0.0385119	-6.68231	2.35207e-11	1.76761e-10	ENSG00000148300.12_REXO4	down	YES
1232.88	-0.306612	0.0459572	-6.67169	2.52872e-11	1.89913e-10	ENSG00000213024.12_NUP62	down	YES
2035.45	0.260772	0.0390903	6.67101	2.54043e-11	1.90671e-10	ENSG00000242372.9_EIF6	up	YES
291.716	0.552221	0.0827813	6.67085	2.54332e-11	1.90765e-10	ENSG00000170464.10_DNAJC18	up	YES
641.271	-0.404822	0.0606948	-6.66979	2.56163e-11	1.92016e-10	ENSG00000065882.16_TBC1D1	down	YES
552.758	-0.421036	0.06315	-6.66724	2.60664e-11	1.95265e-10	ENSG00000169136.12_ATF5	down	YES
538.88	0.427874	0.0641799	6.6668	2.61449e-11	1.95727e-10	ENSG00000040487.13_SLC66A1	up	YES
133.491	0.798338	0.119762	6.66605	2.62786e-11	1.96603e-10	ENSG00000237289.10_CKMT1B	up	YES
694.698	0.367491	0.0551548	6.66292	2.68447e-11	2.00709e-10	ENSG00000142089.17_IFITM3	up	YES
85.6357	1.06299	0.159552	6.66234	2.69496e-11	2.01365e-10	ENSG00000163235.16_TGFA	up	YES
710.527	0.376304	0.0565181	6.65812	2.77349e-11	2.071e-10	ENSG00000100216.6_TOMM22	up	YES
1186.17	0.290754	0.0436835	6.65591	2.81555e-11	2.10107e-10	ENSG00000197586.13_ENTPD6	up	YES
2391.12	-0.228811	0.0343921	-6.653	2.87179e-11	2.14167e-10	ENSG00000143569.19_UBAP2L	down	YES
1449.42	-0.273634	0.0411529	-6.6492	2.94693e-11	2.19631e-10	ENSG00000100403.12_ZC3H7B	down	YES
574.02	0.399571	0.0601016	6.64827	2.96563e-11	2.20884e-10	ENSG00000050426.16_LETMD1	up	YES
5412.79	-0.230673	0.0347045	-6.64679	2.99546e-11	2.22964e-10	ENSG00000185650.10_ZFP36L1	down	YES
1680.89	0.254204	0.0382463	6.6465	3.00151e-11	2.23272e-10	ENSG00000254999.4_BRK1	up	YES
895.935	-0.324483	0.0488353	-6.64444	3.04362e-11	2.26261e-10	ENSG00000169641.13_LUZP1	down	YES
676.45	-0.375802	0.0565763	-6.64239	3.08627e-11	2.29285e-10	ENSG00000176994.11_SMCR8	down	YES
578.448	0.416306	0.0626868	6.64105	3.11452e-11	2.31237e-10	ENSG00000172172.8_MRPL13	up	YES
720.811	-0.390219	0.0587662	-6.6402	3.13263e-11	2.32434e-10	ENSG00000143776.19_CDC42BPA	down	YES
438.066	0.455055	0.0685386	6.6394	3.14963e-11	2.33547e-10	ENSG00000116406.19_EDEM3	up	YES
455.804	0.444695	0.0669917	6.63806	3.17845e-11	2.35536e-10	ENSG00000185127.6_C6orf120	up	YES
745.224	-0.353959	0.0534017	-6.62824	3.39715e-11	2.51583e-10	ENSG00000100084.14_HIRA	down	YES
610.653	0.392841	0.0592694	6.62806	3.4013e-11	2.5173e-10	ENSG00000026297.17_RNASET2	up	YES
648.593	-0.408672	0.0617152	-6.62189	3.54628e-11	2.62295e-10	ENSG00000198646.14_NCOA6	down	YES
691.051	-0.38103	0.057578	-6.61763	3.65007e-11	2.69801e-10	ENSG00000107863.19_ARHGAP21	down	YES
278.192	0.554548	0.083831	6.61508	3.71359e-11	2.74323e-10	ENSG00000170425.4_ADORA2B	up	YES
715.632	0.383695	0.058019	6.61327	3.75929e-11	2.77523e-10	ENSG00000105612.9_DNASE2	up	YES
727.435	0.358295	0.054189	6.61196	3.79274e-11	2.79816e-10	ENSG00000139684.15_ESD	up	YES
580.476	0.393092	0.0594563	6.61144	3.80589e-11	2.80609e-10	ENSG00000162642.14_C1orf52	up	YES
360.623	0.484878	0.0734056	6.60547	3.96262e-11	2.91981e-10	ENSG00000114023.15_FAM162A	up	YES
443.05	-0.451534	0.0683753	-6.60376	4.00856e-11	2.9518e-10	ENSG00000113645.15_WWC1	down	YES
3571.74	-0.19413	0.0294048	-6.60199	4.05661e-11	2.98531e-10	ENSG00000176170.14_SPHK1	down	YES
355.525	0.502043	0.0760763	6.59921	4.13361e-11	3.04006e-10	ENSG00000168792.5_ABHD15	up	YES
869.083	0.331507	0.0502496	6.59719	4.19013e-11	3.07969e-10	ENSG00000187764.12_SEMA4D	up	YES
1071.07	0.325155	0.0493316	6.59122	4.36225e-11	3.20419e-10	ENSG00000182197.13_EXT1	up	YES
3350.89	0.220622	0.0334806	6.58956	4.41136e-11	3.23822e-10	ENSG00000128342.5_LIF	up	YES
871.412	-0.331072	0.0502749	-6.58523	4.54195e-11	3.332e-10	ENSG00000196535.17_MYO18A	down	YES
383.237	0.481684	0.0731485	6.58501	4.54848e-11	3.3347e-10	ENSG00000168591.16_TMUB2	up	YES
95.3426	0.940501	0.142949	6.57925	4.72817e-11	3.46427e-10	ENSG00000164180.14_TMEM161B	up	YES
3954.58	-0.207901	0.0316359	-6.57169	4.97479e-11	3.64268e-10	ENSG00000119318.13_RAD23B	down	YES
98.7666	0.929899	0.141519	6.57085	5.00284e-11	3.66093e-10	ENSG00000067221.14_STOML1	up	YES
1187.25	0.301129	0.0458305	6.57049	5.01499e-11	3.66753e-10	ENSG00000158747.15_NBL1	up	YES
956.854	-0.344474	0.0524597	-6.56644	5.15314e-11	3.7662e-10	ENSG00000184863.11_RBM33	down	YES
2140.6	-0.228438	0.034795	-6.56525	5.19445e-11	3.79402e-10	ENSG00000160877.6_NACC1	down	YES
320.536	0.571886	0.087118	6.5645	5.22094e-11	3.811e-10	ENSG00000164465.19_DCBLD1	up	YES
319.43	0.528253	0.0805806	6.55559	5.54233e-11	4.04307e-10	ENSG00000167925.16_GHDC	up	YES
2096.7	-0.233472	0.0356215	-6.55423	5.59313e-11	4.07759e-10	ENSG00000090060.19_PAPOLA	down	YES
262.309	0.561674	0.0857096	6.55323	5.63074e-11	4.10245e-10	ENSG00000059769.20_DNAJC25	up	YES
230.079	0.617132	0.0942886	6.54514	5.94411e-11	4.32807e-10	ENSG00000140395.9_WDR61	up	YES
2186.78	-0.22862	0.0349452	-6.54226	6.05969e-11	4.40948e-10	ENSG00000188986.9_NELFB	down	YES
358.276	0.495386	0.0757461	6.54009	6.14828e-11	4.47117e-10	ENSG00000117691.10_NENF	up	YES
512.826	0.4127	0.0631293	6.53738	6.26059e-11	4.55001e-10	ENSG00000185033.14_SEMA4B	up	YES
282.969	0.547649	0.0837993	6.53525	6.3505e-11	4.61249e-10	ENSG00000185442.13_FAM174B	up	YES
983.013	-0.329794	0.0504762	-6.53365	6.41872e-11	4.65915e-10	ENSG00000080503.24_SMARCA2	down	YES
1945.7	-0.254652	0.0389886	-6.53146	6.51319e-11	4.72479e-10	ENSG00000134107.5_BHLHE40	down	YES
1463.52	-0.286226	0.0438293	-6.53047	6.55619e-11	4.75304e-10	ENSG00000116350.17_SRSF4	down	YES
943.214	-0.325383	0.0498412	-6.5284	6.64753e-11	4.81627e-10	ENSG00000257923.12_CUX1	down	YES
1985.21	-0.237465	0.0363762	-6.52803	6.66397e-11	4.82519e-10	ENSG00000175130.7_MARCKSL1	down	YES
1072.29	-0.30518	0.0467572	-6.52691	6.71426e-11	4.8586e-10	ENSG00000125755.19_SYMPK	down	YES
274.929	0.554723	0.0850178	6.52479	6.80986e-11	4.92473e-10	ENSG00000180488.15_MIGA1	up	YES
860.871	0.334932	0.0513458	6.52307	6.88825e-11	4.97835e-10	ENSG00000213782.7_DDX47	up	YES
519.993	-0.413276	0.0633604	-6.52262	6.90895e-11	4.99022e-10	ENSG00000048707.15_VPS13D	down	YES
777.609	0.34527	0.052936	6.52242	6.91831e-11	4.9939e-10	ENSG00000115234.11_SNX17	up	YES
1251.82	-0.323596	0.0496391	-6.51897	7.07917e-11	5.10687e-10	ENSG00000149782.13_PLCB3	down	YES
941.104	-0.320669	0.0492014	-6.51747	7.15035e-11	5.15504e-10	ENSG00000272405.1_RP11-284F21.10	down	YES
607.93	-0.378942	0.058174	-6.51393	7.32078e-11	5.27466e-10	ENSG00000168005.9_SPINDOC	down	YES
243.132	0.583843	0.0896864	6.50983	7.52351e-11	5.41739e-10	ENSG00000159884.12_CCDC107	up	YES
334.605	0.499968	0.0768359	6.50696	7.66866e-11	5.51851e-10	ENSG00000139636.16_LMBR1L	up	YES
477.611	0.436468	0.0670849	6.50621	7.70721e-11	5.54284e-10	ENSG00000023041.12_ZDHHC6	up	YES
217.389	0.617463	0.0949348	6.50407	7.81759e-11	5.61877e-10	ENSG00000117242.7_PINK1-AS	up	YES
973.981	-0.306587	0.047184	-6.4977	8.15598e-11	5.85839e-10	ENSG00000165156.15_ZHX1	down	YES
859.304	-0.356881	0.0549331	-6.49665	8.21267e-11	5.89549e-10	ENSG00000134318.14_ROCK2	down	YES
1141.83	-0.289718	0.0446056	-6.49511	8.29745e-11	5.95269e-10	ENSG00000197122.12_SRC	down	YES
86.4271	0.984147	0.151619	6.49091	8.53201e-11	6.11722e-10	ENSG00000126709.16_IFI6	up	YES
273.487	0.6041	0.0930737	6.49055	8.55239e-11	6.12808e-10	ENSG00000101464.11_PIGU	up	YES
669.331	0.366235	0.0565334	6.4782	9.28223e-11	6.64696e-10	ENSG00000188603.22_CLN3	up	YES
1257.69	0.274537	0.0424071	6.47383	9.555e-11	6.83811e-10	ENSG00000157193.18_LRP8	up	YES
610.057	-0.380322	0.0587565	-6.47285	9.61728e-11	6.87847e-10	ENSG00000115020.17_PIKFYVE	down	YES
1042.77	0.310833	0.0480722	6.46596	1.00659e-10	7.19494e-10	ENSG00000074660.16_SCARF1	up	YES
1488.49	0.259818	0.0401854	6.46547	1.00982e-10	7.21362e-10	ENSG00000152127.9_MGAT5	up	YES
1241.45	-0.297721	0.0460589	-6.46393	1.02015e-10	7.28296e-10	ENSG00000108819.11_PPP1R9B	down	YES
788.216	-0.344321	0.0532876	-6.46156	1.03629e-10	7.39365e-10	ENSG00000116641.18_DOCK7	down	YES
235.785	0.583331	0.0903594	6.45568	1.07736e-10	7.68201e-10	ENSG00000181264.9_TLCD5	up	YES
854.816	0.325322	0.0504378	6.44996	1.11878e-10	7.97249e-10	ENSG00000137955.16_RABGGTB	up	YES
692.603	-0.356081	0.0552112	-6.44944	1.12263e-10	7.99507e-10	ENSG00000172661.19_WASHC2C	down	YES
683.813	0.3558	0.0551902	6.4468	1.14236e-10	8.13064e-10	ENSG00000146242.9_TPBG	up	YES
739.995	0.35325	0.0548214	6.44365	1.16637e-10	8.29646e-10	ENSG00000179431.7_FJX1	up	YES
932.459	-0.317808	0.0493283	-6.4427	1.17365e-10	8.34319e-10	ENSG00000173575.22_CHD2	down	YES
2111.33	-0.234067	0.0363616	-6.43721	1.21692e-10	8.64556e-10	ENSG00000265241.7_RBM8A	down	YES
93.1765	0.949965	0.147628	6.43486	1.23588e-10	8.77489e-10	ENSG00000141574.8_SECTM1	up	YES
536.055	0.412703	0.0641708	6.43132	1.26502e-10	8.97634e-10	ENSG00000108219.15_TSPAN14	up	YES
11123	0.216529	0.0336705	6.43082	1.26918e-10	9.00038e-10	ENSG00000008988.11_RPS20	up	YES
574.53	-0.391569	0.0608937	-6.43037	1.27298e-10	9.02187e-10	ENSG00000135966.13_TGFBRAP1	down	YES
122.03	-0.821001	0.127906	-6.41876	1.37384e-10	9.73084e-10	ENSG00000288710.1_RP11-386G11.12	down	YES
1817.09	-0.236687	0.036888	-6.41637	1.39565e-10	9.87934e-10	ENSG00000179195.16_ZNF664	down	YES
1084.47	-0.294734	0.0459667	-6.4119	1.43719e-10	1.01672e-09	ENSG00000160007.19_ARHGAP35	down	YES
89.899	0.938949	0.146456	6.41111	1.4446e-10	1.02134e-09	ENSG00000160588.10_MPZL3	up	YES
601.06	-0.389251	0.0608442	-6.39751	1.57933e-10	1.11593e-09	ENSG00000100503.26_NIN	down	YES
437.787	-0.437717	0.0684253	-6.397	1.5846e-10	1.11897e-09	ENSG00000174197.17_MGA	down	YES
2207.77	-0.236879	0.037055	-6.39264	1.63051e-10	1.1507e-09	ENSG00000124181.14_PLCG1	down	YES
701.573	0.355656	0.0556368	6.39246	1.63242e-10	1.15135e-09	ENSG00000110328.6_GALNT18	up	YES
9334.25	-0.145915	0.022827	-6.39219	1.63529e-10	1.15268e-09	ENSG00000196230.14_TUBB	down	YES
471.78	0.425529	0.0665792	6.39133	1.64454e-10	1.15851e-09	ENSG00000176454.14_LPCAT4	up	YES
1412.18	-0.265443	0.0415337	-6.39103	1.64769e-10	1.16003e-09	ENSG00000160208.13_RRP1B	down	YES
454.739	0.426495	0.0667402	6.39039	1.65468e-10	1.16425e-09	ENSG00000178904.19_DPY19L3	up	YES
50.5967	1.35841	0.21291	6.38023	1.76828e-10	1.24343e-09	ENSG00000169429.11_CXCL8	up	YES
198.01	0.635459	0.0996021	6.37998	1.77114e-10	1.24469e-09	ENSG00000168938.6_PPIC	up	YES
339.29	-0.490757	0.0769782	-6.37527	1.8264e-10	1.28276e-09	ENSG00000070444.15_MNT	down	YES
1298.48	-0.269827	0.0423517	-6.3711	1.87674e-10	1.31732e-09	ENSG00000204304.12_PBX2	down	YES
218.427	0.596656	0.0937098	6.36706	1.92685e-10	1.35169e-09	ENSG00000188811.14_NHLRC3	up	YES
1042.01	0.296062	0.0465344	6.36222	1.9886e-10	1.39417e-09	ENSG00000092010.15_PSME1	up	YES
770.308	0.331979	0.0521814	6.36201	1.99126e-10	1.3952e-09	ENSG00000115159.16_GPD2	up	YES
1338.34	0.268516	0.0422074	6.36182	1.99378e-10	1.39613e-09	ENSG00000127884.5_ECHS1	up	YES
690.981	-0.366582	0.057646	-6.35921	2.028e-10	1.41924e-09	ENSG00000171681.13_ATF7IP	down	YES
345.347	0.492676	0.0774827	6.35853	2.03689e-10	1.42461e-09	ENSG00000110057.8_UNC93B1	up	YES
2175.95	0.247934	0.0389998	6.35731	2.05311e-10	1.43509e-09	ENSG00000010256.11_UQCRC1	up	YES
740.444	-0.411528	0.0647834	-6.35237	2.12024e-10	1.48113e-09	ENSG00000196498.13_NCOR2	down	YES
925.566	0.326281	0.051373	6.35122	2.13615e-10	1.49135e-09	ENSG00000100300.18_TSPO	up	YES
995.625	-0.350839	0.0552548	-6.34948	2.16038e-10	1.50737e-09	ENSG00000119596.18_YLPM1	down	YES
138.33	0.751874	0.118417	6.34937	2.16197e-10	1.50758e-09	ENSG00000106688.12_SLC1A1	up	YES
307.216	0.515113	0.0812235	6.34193	2.26906e-10	1.58131e-09	ENSG00000106603.20_COA1	up	YES
3880.99	-0.19002	0.029985	-6.33716	2.3404e-10	1.63006e-09	ENSG00000177733.7_HNRNPA0	down	YES
980.78	0.299258	0.0473153	6.32475	2.53645e-10	1.76556e-09	ENSG00000122861.16_PLAU	up	YES
1142.93	-0.281104	0.0444462	-6.32459	2.53902e-10	1.76629e-09	ENSG00000131459.13_GFPT2	down	YES
6144.35	0.174878	0.0276518	6.3243	2.54377e-10	1.76855e-09	ENSG00000145741.16_BTF3	up	YES
665.495	0.351231	0.0555835	6.31897	2.63308e-10	1.82955e-09	ENSG00000136478.8_TEX2	up	YES
535.658	-0.398364	0.0630516	-6.31806	2.64868e-10	1.8393e-09	ENSG00000186111.11_PIP5K1C	down	YES
152.472	-0.758321	0.120153	-6.31127	2.76756e-10	1.92072e-09	ENSG00000196810.5_CTBP1-DT	down	YES
846.934	0.314822	0.0498975	6.30937	2.80165e-10	1.94322e-09	ENSG00000162129.14_CLPB	up	YES
657.109	0.35573	0.0564075	6.30642	2.85561e-10	1.97947e-09	ENSG00000178401.16_DNAJC22	up	YES
927.565	0.30857	0.0489967	6.29778	3.01945e-10	2.0918e-09	ENSG00000211460.12_TSN	up	YES
2025.13	-0.234025	0.0371809	-6.29424	3.08914e-10	2.13882e-09	ENSG00000091527.16_CDV3	down	YES
134.13	0.777898	0.123592	6.29407	3.09247e-10	2.13986e-09	ENSG00000109255.11_NMU	up	YES
603.791	-0.386463	0.0614088	-6.29328	3.1082e-10	2.14947e-09	ENSG00000067596.12_DHX8	down	YES
424.152	0.442608	0.0703436	6.29209	3.13218e-10	2.16477e-09	ENSG00000182372.10_CLN8	up	YES
1001.98	-0.298018	0.0473684	-6.2915	3.14416e-10	2.17177e-09	ENSG00000128829.12_EIF2AK4	down	YES
762.5	0.34915	0.0555257	6.28808	3.2141e-10	2.21877e-09	ENSG00000092445.12_TYRO3	up	YES
530.537	-0.385728	0.061387	-6.28356	3.30916e-10	2.28305e-09	ENSG00000243156.9_MICAL3	down	YES
246.745	0.573934	0.0913488	6.28288	3.32351e-10	2.2916e-09	ENSG00000109016.17_DHRS7B	up	YES
1466.14	0.28862	0.0459639	6.27927	3.40157e-10	2.34404e-09	ENSG00000070831.17_CDC42	up	YES
268.231	0.538644	0.0858207	6.27639	3.46535e-10	2.38518e-09	ENSG00000164300.17_SERINC5	up	YES
602.454	0.365716	0.0582678	6.27646	3.4637e-10	2.38518e-09	ENSG00000277443.3_MARCKS	up	YES
118.33	0.805137	0.128303	6.27529	3.48976e-10	2.40057e-09	ENSG00000251201.8_TMED7-TICAM2	up	YES
350.23	0.479645	0.0764503	6.27395	3.51992e-10	2.41948e-09	ENSG00000023697.13_DERA	up	YES
4377.18	0.175065	0.0279037	6.27389	3.52138e-10	2.41948e-09	ENSG00000112081.17_SRSF3	up	YES
868.245	-0.323178	0.0515186	-6.27304	3.54071e-10	2.43119e-09	ENSG00000166925.9_TSC22D4	down	YES
519.14	-0.455442	0.072604	-6.27296	3.54258e-10	2.43119e-09	ENSG00000260914.3_RP11-343C2.11	down	YES
4070.66	-0.181015	0.028868	-6.27042	3.6007e-10	2.46962e-09	ENSG00000104738.18_MCM4	down	YES
930.087	-0.323012	0.0515435	-6.26679	3.68576e-10	2.52648e-09	ENSG00000107815.10_TWNK	down	YES
1704.96	-0.24824	0.0396126	-6.26668	3.68821e-10	2.52668e-09	ENSG00000055130.17_CUL1	down	YES
528.547	-0.39418	0.0629253	-6.26425	3.74622e-10	2.56492e-09	ENSG00000133789.15_SWAP70	down	YES
2553.68	-0.211551	0.0337783	-6.26293	3.77799e-10	2.58516e-09	ENSG00000124422.12_USP22	down	YES
322.495	-0.502851	0.0803329	-6.25959	3.86e-10	2.63973e-09	ENSG00000118689.15_FOXO3	down	YES
1276.02	-0.280445	0.0448188	-6.2573	3.91711e-10	2.67722e-09	ENSG00000275700.6_AATF	down	YES
935.004	-0.327228	0.0522973	-6.25706	3.92294e-10	2.67965e-09	ENSG00000062650.20_WAPL	down	YES
185.112	0.63359	0.101263	6.25689	3.92727e-10	2.68103e-09	ENSG00000164187.7_LMBRD2	up	YES
41.3314	1.43672	0.229927	6.24859	4.14187e-10	2.82424e-09	ENSG00000110031.13_LPXN	up	YES
2160.26	-0.229637	0.03675	-6.24861	4.14124e-10	2.82424e-09	ENSG00000153201.16_RANBP2	down	YES
1159.52	-0.291372	0.0466354	-6.24786	4.16108e-10	2.83569e-09	ENSG00000187147.18_RNF220	down	YES
132.269	0.745787	0.1194	6.2461	4.20825e-10	2.86616e-09	ENSG00000145476.16_CYP4V2	up	YES
178.634	0.666435	0.106765	6.24208	4.31791e-10	2.93743e-09	ENSG00000101955.15_SRPX	up	YES
1026.1	0.291206	0.0466518	6.24213	4.3166e-10	2.93743e-09	ENSG00000140157.16_NIPA2	up	YES
1414.73	0.27932	0.0447969	6.23526	4.51032e-10	3.06655e-09	ENSG00000123975.5_CKS2	up	YES
1564.94	-0.252792	0.0405497	-6.23413	4.54304e-10	3.087e-09	ENSG00000084652.16_TXLNA	down	YES
2653.18	0.228365	0.0366385	6.23293	4.578e-10	3.10895e-09	ENSG00000148400.13_NOTCH1	up	YES
545.803	0.406046	0.0651495	6.23252	4.58984e-10	3.11518e-09	ENSG00000105583.11_WDR83OS	up	YES
637.808	-0.358708	0.0575719	-6.2306	4.64641e-10	3.15175e-09	ENSG00000130522.6_JUND	down	YES
1019.94	0.298457	0.047925	6.22758	4.73683e-10	3.21122e-09	ENSG00000142867.14_BCL10	up	YES
252.364	0.54925	0.0882049	6.22698	4.75501e-10	3.22168e-09	ENSG00000215717.7_TMEM167B	up	YES
758.621	0.336903	0.0541603	6.22047	4.95671e-10	3.35639e-09	ENSG00000165792.18_METTL17	up	YES
791.496	-0.339855	0.0546662	-6.2169	5.07063e-10	3.43155e-09	ENSG00000185262.9_UBALD2	down	YES
666.686	-0.356398	0.0573322	-6.21637	5.08784e-10	3.4412e-09	ENSG00000096060.15_FKBP5	down	YES
447.635	-0.456069	0.0734467	-6.20952	5.31454e-10	3.59246e-09	ENSG00000119669.5_IRF2BPL	down	YES
254.379	0.53805	0.0866529	6.20925	5.32368e-10	3.59656e-09	ENSG00000143801.18_PSEN2	up	YES
967.737	-0.315333	0.0508469	-6.20162	5.58846e-10	3.77326e-09	ENSG00000166123.14_GPT2	down	YES
1014.47	0.298798	0.0481836	6.20124	5.60194e-10	3.78018e-09	ENSG00000119682.18_AREL1	up	YES
3216.33	-0.201132	0.0324359	-6.2009	5.61427e-10	3.78632e-09	ENSG00000078369.18_GNB1	down	YES
310.483	0.498217	0.080437	6.19388	5.87027e-10	3.95669e-09	ENSG00000118762.8_PKD2	up	YES
1353.24	0.265725	0.0429122	6.19229	5.92967e-10	3.99442e-09	ENSG00000111144.10_LTA4H	up	YES
623.471	0.374279	0.0604789	6.18859	6.07056e-10	4.08698e-09	ENSG00000214194.9_SMIM30	up	YES
1885.63	-0.235168	0.0380083	-6.18729	6.12055e-10	4.11826e-09	ENSG00000160447.7_PKN3	down	YES
260.308	0.534402	0.0864262	6.18333	6.27615e-10	4.22053e-09	ENSG00000204642.14_HLA-F	up	YES
100.059	0.900188	0.145619	6.18182	6.33683e-10	4.25889e-09	ENSG00000188760.11_TMEM198	up	YES
426.143	-0.430093	0.0695901	-6.18037	6.39499e-10	4.29551e-09	ENSG00000128596.17_CCDC136	down	YES
460.809	0.427414	0.0691682	6.17934	6.43689e-10	4.32117e-09	ENSG00000113269.14_RNF130	up	YES
2315.06	-0.213314	0.0345262	-6.17831	6.47918e-10	4.34707e-09	ENSG00000124795.17_DEK	down	YES
800.953	0.358661	0.0580612	6.1773	6.52088e-10	4.37249e-09	ENSG00000113328.19_CCNG1	up	YES
1430.8	-0.254154	0.0411438	-6.17721	6.52454e-10	4.37249e-09	ENSG00000146834.14_MEPCE	down	YES
1042.28	-0.311479	0.0504401	-6.17521	6.60742e-10	4.42549e-09	ENSG00000099381.19_SETD1A	down	YES
739.677	0.337839	0.054725	6.17339	6.68417e-10	4.47434e-09	ENSG00000048140.18_TSPAN17	up	YES
1334.62	-0.269793	0.0437226	-6.17057	6.80459e-10	4.55234e-09	ENSG00000102974.16_CTCF	down	YES
315.146	0.479543	0.0777336	6.16906	6.86975e-10	4.59331e-09	ENSG00000103066.13_PLA2G15	up	YES
615.57	-0.392414	0.0636166	-6.16843	6.89728e-10	4.60909e-09	ENSG00000165671.21_NSD1	down	YES
220.293	0.589466	0.095583	6.16706	6.95714e-10	4.64643e-09	ENSG00000055732.13_MCOLN3	up	YES
1573.14	0.260297	0.0422107	6.1666	6.9774e-10	4.6573e-09	ENSG00000186010.19_NDUFA13	up	YES
212.407	0.63579	0.103133	6.16473	7.06041e-10	4.71002e-09	ENSG00000179941.9_BBS10	up	YES
663.915	-0.342666	0.0555923	-6.16392	7.09674e-10	4.73157e-09	ENSG00000164151.12_ICE1	down	YES
1522.65	-0.253028	0.0410916	-6.15766	7.38272e-10	4.91943e-09	ENSG00000204120.16_GIGYF2	down	YES
470.298	-0.416261	0.0676132	-6.15651	7.43669e-10	4.95257e-09	ENSG00000103126.15_AXIN1	down	YES
197.817	0.633657	0.102941	6.15553	7.4828e-10	4.98044e-09	ENSG00000166311.10_SMPD1	up	YES
1374.22	0.254733	0.041389	6.1546	7.52667e-10	5.0068e-09	ENSG00000138768.15_USO1	up	YES
468.415	0.402749	0.0654633	6.15229	7.63721e-10	5.07745e-09	ENSG00000136213.10_CHST12	up	YES
15464.6	0.126864	0.0206268	6.15045	7.72624e-10	5.13371e-09	ENSG00000105640.13_RPL18A	up	YES
225.963	0.568313	0.0924174	6.14941	7.77699e-10	5.1645e-09	ENSG00000120256.11_LRP11	up	YES
654.447	-0.3477	0.0565664	-6.14675	7.9088e-10	5.24905e-09	ENSG00000264522.6_OTUD7B	down	YES
1027.81	0.290232	0.0472754	6.13916	8.29575e-10	5.50275e-09	ENSG00000159363.19_ATP13A2	up	YES
567.369	0.389309	0.0634196	6.13863	8.32387e-10	5.51828e-09	ENSG00000167447.13_SMG8	up	YES
2318.19	-0.213662	0.0348093	-6.13807	8.35278e-10	5.53431e-09	ENSG00000158941.16_CCAR2	down	YES
1515.55	-0.242273	0.039474	-6.13753	8.38133e-10	5.55008e-09	ENSG00000079805.19_DNM2	down	YES
2104.33	-0.225572	0.0367609	-6.13621	8.45152e-10	5.5934e-09	ENSG00000153147.6_SMARCA5	down	YES
190.175	0.622038	0.101376	6.13598	8.46342e-10	5.5981e-09	ENSG00000136770.11_DNAJC1	up	YES
631.067	0.346825	0.0565291	6.13534	8.49795e-10	5.61777e-09	ENSG00000113845.10_TIMMDC1	up	YES
540.782	-0.388107	0.0632691	-6.13423	8.55716e-10	5.65372e-09	ENSG00000130158.14_DOCK6	down	YES
1713.59	-0.259365	0.0422825	-6.1341	8.56441e-10	5.65531e-09	ENSG00000173473.11_SMARCC1	down	YES
1722.48	-0.234719	0.0382702	-6.13319	8.61333e-10	5.68441e-09	ENSG00000132780.17_NASP	down	YES
6169.08	0.373004	0.0608411	6.1308	8.74384e-10	5.76729e-09	ENSG00000143947.15_RPS27A	up	YES
656.282	-0.385948	0.0629661	-6.12946	8.81786e-10	5.81283e-09	ENSG00000132694.19_ARHGEF11	down	YES
289.887	0.515661	0.0841712	6.12633	8.99288e-10	5.92487e-09	ENSG00000111666.11_CHPT1	up	YES
929.073	0.296526	0.0484581	6.11922	9.40365e-10	6.19202e-09	ENSG00000171208.10_NETO2	up	YES
343.928	0.46812	0.0765041	6.11888	9.42339e-10	6.20152e-09	ENSG00000106477.20_CEP41	up	YES
1930.05	-0.22716	0.0371308	-6.11782	9.48619e-10	6.23934e-09	ENSG00000107164.16_FUBP3	down	YES
1022.34	0.288665	0.047206	6.115	9.65592e-10	6.34741e-09	ENSG00000091483.8_FH	up	YES
332.362	-0.48473	0.0792809	-6.11409	9.71092e-10	6.37998e-09	ENSG00000130449.6_ZSWIM6	down	YES
717.203	-0.353202	0.0577721	-6.11371	9.73413e-10	6.39164e-09	ENSG00000164190.19_NIPBL	down	YES
313.711	-0.479827	0.0785099	-6.11167	9.85914e-10	6.47009e-09	ENSG00000129680.16_MAP7D3	down	YES
4865.63	0.413308	0.0676276	6.11152	9.86864e-10	6.4727e-09	ENSG00000134419.15_RPS15A	up	YES
1265.74	-0.259236	0.0424232	-6.11072	9.91843e-10	6.50171e-09	ENSG00000130227.17_XPO7	down	YES
454.702	0.430263	0.0704646	6.10609	1.02104e-09	6.68937e-09	ENSG00000147654.15_EBAG9	up	YES
450.652	0.417537	0.0684366	6.10108	1.05357e-09	6.89862e-09	ENSG00000103152.12_MPG	up	YES
426.978	0.416706	0.0683015	6.10098	1.05421e-09	6.89895e-09	ENSG00000121210.16_TMEM131L	up	YES
807.99	-0.332512	0.0545488	-6.09569	1.08969e-09	7.12711e-09	ENSG00000140332.17_TLE3	down	YES
310.882	0.494288	0.0811066	6.09431	1.09913e-09	7.18487e-09	ENSG00000105755.8_ETHE1	up	YES
58.5364	1.12007	0.183823	6.0932	1.10676e-09	7.23068e-09	ENSG00000135318.12_NT5E	up	YES
447.036	0.416219	0.0683173	6.09244	1.11206e-09	7.26126e-09	ENSG00000213246.7_SUPT4H1	up	YES
770.657	-0.350771	0.0575858	-6.09127	1.12017e-09	7.31015e-09	ENSG00000157827.20_FMNL2	down	YES
1281.75	0.261091	0.0428848	6.08819	1.14192e-09	7.44792e-09	ENSG00000166595.12_CIAO2B	up	YES
3567.08	0.197331	0.0324149	6.08767	1.14562e-09	7.46794e-09	ENSG00000136840.19_ST6GALNAC4	up	YES
605.418	0.365555	0.0601221	6.08021	1.20022e-09	7.8195e-09	ENSG00000181830.9_SLC35C1	up	YES
147039	0.182119	0.02996	6.07876	1.21113e-09	7.88619e-09	ENSG00000156508.19_EEF1A1	up	YES
309.352	0.48582	0.0799293	6.07813	1.21595e-09	7.91314e-09	ENSG00000161682.15_FAM171A2	up	YES
5783.26	0.171841	0.0282814	6.07613	1.23121e-09	8.00801e-09	ENSG00000092199.18_HNRNPC	up	YES
1115.94	0.607158	0.0999378	6.07536	1.23713e-09	8.04202e-09	ENSG00000112695.12_COX7A2	up	YES
610.357	-0.360109	0.0592873	-6.07396	1.24792e-09	8.10766e-09	ENSG00000169957.10_ZNF768	down	YES
1218.63	-0.260963	0.0429784	-6.07195	1.26365e-09	8.20532e-09	ENSG00000175416.16_CLTB	down	YES
410.135	0.434434	0.0716017	6.06738	1.30018e-09	8.4378e-09	ENSG00000164168.8_TMEM184C	up	YES
1792.99	0.22562	0.0371987	6.06527	1.31731e-09	8.54423e-09	ENSG00000073578.17_SDHA	up	YES
6953.13	0.565074	0.0931923	6.06353	1.33169e-09	8.63272e-09	ENSG00000211459.2_MT-RNR1	up	YES
888.327	-0.308071	0.0508123	-6.06293	1.33665e-09	8.66012e-09	ENSG00000186350.12_RXRA	down	YES
849.555	-0.314904	0.0519544	-6.06117	1.35137e-09	8.75064e-09	ENSG00000134644.16_PUM1	down	YES
1403.52	0.250227	0.0413114	6.0571	1.38598e-09	8.9698e-09	ENSG00000164715.6_LMTK2	up	YES
3299.92	0.182599	0.0301725	6.05184	1.43203e-09	9.26267e-09	ENSG00000100129.18_EIF3L	up	YES
1988.22	-0.222999	0.0368556	-6.05061	1.44303e-09	9.32866e-09	ENSG00000103326.12_CAPN15	down	YES
1447.08	-0.256946	0.0425046	-6.04514	1.49279e-09	9.64504e-09	ENSG00000153113.24_CAST	down	YES
624.026	0.350111	0.0579557	6.04102	1.53146e-09	9.88941e-09	ENSG00000099203.7_TMED1	up	YES
733.036	-0.32685	0.0541061	-6.04091	1.53251e-09	9.89076e-09	ENSG00000112972.15_HMGCS1	down	YES
1537.05	0.237299	0.0393177	6.03541	1.58557e-09	1.02275e-08	ENSG00000138031.15_ADCY3	up	YES
3073.86	-0.184806	0.0306485	-6.02987	1.64092e-09	1.05788e-08	ENSG00000148396.18_SEC16A	down	YES
1427.93	-0.251379	0.0417036	-6.02774	1.66266e-09	1.0713e-08	ENSG00000141985.9_SH3GL1	down	YES
1123.65	-0.289739	0.0480844	-6.02564	1.68441e-09	1.08472e-08	ENSG00000282034.1_RP11-2C24.9	down	YES
536.351	0.369879	0.0614246	6.02167	1.72622e-09	1.11103e-08	ENSG00000181610.13_MRPS23	up	YES
1181.12	-0.262156	0.0435405	-6.02097	1.7338e-09	1.11529e-08	ENSG00000179832.18_MROH1	down	YES
550.519	0.373273	0.0620036	6.02018	1.7422e-09	1.12008e-08	ENSG00000198874.13_TYW1	up	YES
2481.58	0.199865	0.0332141	6.01747	1.7717e-09	1.13842e-08	ENSG00000140564.13_FURIN	up	YES
7884.56	0.192926	0.0320675	6.01624	1.78513e-09	1.14642e-08	ENSG00000103335.22_PIEZO1	up	YES
1742.04	-0.227342	0.0377926	-6.01552	1.79315e-09	1.15094e-08	ENSG00000130811.12_EIF3G	down	YES
771.076	0.315751	0.0525261	6.01132	1.84024e-09	1.18052e-08	ENSG00000030066.13_NUP160	up	YES
533.325	-0.383065	0.063734	-6.01037	1.851e-09	1.18677e-08	ENSG00000139718.11_SETD1B	down	YES
201.666	0.652698	0.108599	6.01015	1.8535e-09	1.18772e-08	ENSG00000284820.1_RP11-803J6.1	up	YES
269.624	0.520294	0.0866092	6.00737	1.88553e-09	1.20759e-08	ENSG00000258947.8_TUBB3	up	YES
1399.71	-0.243956	0.0406281	-6.00461	1.91789e-09	1.22764e-08	ENSG00000257103.9_LSM14A	down	YES
2305.34	-0.208045	0.0346787	-5.99921	1.98279e-09	1.26849e-08	ENSG00000105063.19_PPP6R1	down	YES
188.907	0.622989	0.10386	5.99837	1.99303e-09	1.27434e-08	ENSG00000102996.5_MMP15	up	YES
2268.75	-0.206537	0.0344576	-5.99394	2.04812e-09	1.30885e-08	ENSG00000125970.12_RALY	down	YES
350.981	0.465821	0.07772	5.99357	2.05278e-09	1.31111e-08	ENSG00000168002.12_POLR2G	up	YES
34.2281	1.63126	0.272185	5.9932	2.05746e-09	1.31339e-08	ENSG00000214940.8_NPIPA8	up	YES
570.375	-0.374309	0.0625064	-5.98833	2.12004e-09	1.3526e-08	ENSG00000148498.16_PARD3	down	YES
3937.97	-0.228271	0.0381677	-5.98074	2.22122e-09	1.41638e-08	ENSG00000127603.31_MACF1	down	YES
792.262	0.330499	0.0552649	5.98026	2.22779e-09	1.41979e-08	ENSG00000197217.13_ENTPD4	up	YES
287.421	0.506835	0.084802	5.97669	2.27723e-09	1.45051e-08	ENSG00000136856.18_SLC2A8	up	YES
1065.93	-0.276585	0.0462902	-5.97503	2.30053e-09	1.46455e-08	ENSG00000100441.10_KHNYN	down	YES
2854.3	-0.19913	0.0333573	-5.9696	2.3783e-09	1.51324e-08	ENSG00000137076.21_TLN1	down	YES
464.634	0.419541	0.0702979	5.96805	2.40109e-09	1.52691e-08	ENSG00000197045.13_GMFB	up	YES
431.394	0.408308	0.0684324	5.96659	2.42268e-09	1.53981e-08	ENSG00000143590.14_EFNA3	up	YES
2909.17	-0.216446	0.0362778	-5.96636	2.42607e-09	1.54112e-08	ENSG00000111676.15_ATN1	down	YES
615.125	0.352686	0.0591168	5.96592	2.43263e-09	1.54445e-08	ENSG00000117528.14_ABCD3	up	YES
766.826	-0.328588	0.055083	-5.96532	2.44153e-09	1.54926e-08	ENSG00000172943.20_PHF8	down	YES
806.07	0.302776	0.050759	5.96497	2.44678e-09	1.55175e-08	ENSG00000169976.7_SF3B5	up	YES
446.272	-0.398925	0.0668814	-5.96466	2.45138e-09	1.55383e-08	ENSG00000185989.11_RASA3	down	YES
371.351	0.440279	0.0738596	5.96102	2.50663e-09	1.58798e-08	ENSG00000172828.13_CES3	up	YES
5548.69	-0.165107	0.0277023	-5.96004	2.52169e-09	1.59666e-08	ENSG00000108424.11_KPNB1	down	YES
6432.71	-0.166014	0.0278555	-5.95984	2.52493e-09	1.59785e-08	ENSG00000011304.22_PTBP1	down	YES
1012.2	-0.274477	0.0460815	-5.95635	2.57931e-09	1.63138e-08	ENSG00000101350.8_KIF3B	down	YES
296.791	0.489898	0.0822986	5.95269	2.6377e-09	1.66741e-08	ENSG00000163293.12_NIPAL1	up	YES
411.392	-0.430817	0.0724167	-5.94915	2.69544e-09	1.70299e-08	ENSG00000157764.14_BRAF	down	YES
350.289	0.448667	0.0754576	5.94595	2.74855e-09	1.73561e-08	ENSG00000164543.7_STK17A	up	YES
276.129	0.529418	0.0890524	5.94501	2.76442e-09	1.74469e-08	ENSG00000109066.14_TMEM104	up	YES
307.18	0.473141	0.0795946	5.94438	2.77497e-09	1.7504e-08	ENSG00000104343.21_UBE2W	up	YES
590.518	0.346582	0.0583124	5.94354	2.7893e-09	1.75827e-08	ENSG00000125734.15_GPR108	up	YES
700.999	-0.332446	0.0559346	-5.94347	2.79046e-09	1.75827e-08	ENSG00000149657.20_LSM14B	down	YES
482.324	0.387797	0.0652605	5.9423	2.81059e-09	1.77001e-08	ENSG00000174173.7_TRMT10C	up	YES
712.403	-0.331536	0.0558102	-5.94042	2.84287e-09	1.78937e-08	ENSG00000118200.14_CAMSAP2	down	YES
124.327	-0.758453	0.127714	-5.93867	2.87343e-09	1.80764e-08	ENSG00000106070.20_GRB10	down	YES
67.8978	1.02103	0.171934	5.93851	2.87632e-09	1.80848e-08	ENSG00000169193.12_CCDC126	up	YES
758.155	0.311168	0.0524119	5.93698	2.90326e-09	1.82444e-08	ENSG00000167863.12_ATP5PD	up	YES
468.869	-0.403424	0.0679534	-5.93678	2.90678e-09	1.82567e-08	ENSG00000145012.14_LPP	down	YES
17774.1	0.164443	0.0277129	5.93382	2.95971e-09	1.85791e-08	ENSG00000157617.17_C2CD2	up	YES
732.531	-0.332305	0.0560216	-5.93174	2.99736e-09	1.88054e-08	ENSG00000179134.15_SAMD4B	down	YES
1341.28	-0.272858	0.0460524	-5.92494	3.12412e-09	1.95902e-08	ENSG00000105993.15_DNAJB6	down	YES
565.722	-0.370143	0.0624849	-5.92372	3.1474e-09	1.97256e-08	ENSG00000072121.17_ZFYVE26	down	YES
873.083	-0.298728	0.0505288	-5.91203	3.37914e-09	2.11666e-08	ENSG00000131149.19_GSE1	down	YES
11956	0.128521	0.0217408	5.91149	3.39028e-09	2.12251e-08	ENSG00000204628.12_RACK1	up	YES
891.281	-0.291247	0.0492903	-5.90881	3.44596e-09	2.15621e-08	ENSG00000158526.8_TSR2	down	YES
3617.17	-0.171418	0.0290233	-5.90623	3.50024e-09	2.18901e-08	ENSG00000136938.9_ANP32B	down	YES
419.287	-0.414171	0.0701276	-5.90596	3.50606e-09	2.19147e-08	ENSG00000147324.11_MFHAS1	down	YES
554.836	-0.36211	0.0613155	-5.90567	3.51209e-09	2.19407e-08	ENSG00000198586.14_TLK1	down	YES
1025.86	-0.283831	0.0480642	-5.90525	3.52123e-09	2.19861e-08	ENSG00000088256.9_GNA11	down	YES
786.327	0.31431	0.0532797	5.89925	3.65161e-09	2.2788e-08	ENSG00000168758.11_SEMA4C	up	YES
408.951	0.409661	0.0694826	5.89587	3.72705e-09	2.32464e-08	ENSG00000087995.16_METTL2A	up	YES
1868.82	0.218492	0.03708	5.89245	3.80515e-09	2.37209e-08	ENSG00000115484.15_CCT4	up	YES
2181.84	-0.224629	0.0381599	-5.88653	3.94385e-09	2.45724e-08	ENSG00000169180.12_XPO6	down	YES
392.233	-0.422008	0.0717002	-5.88574	3.96287e-09	2.46778e-08	ENSG00000234420.7_ZNF37BP	down	YES
509.753	0.366235	0.0622409	5.88415	4.00102e-09	2.49021e-08	ENSG00000005001.10_PRSS22	up	YES
4862.17	-0.157469	0.0267712	-5.88203	4.05261e-09	2.51964e-08	ENSG00000169100.14_SLC25A6	down	YES
4862.17	-0.157469	0.0267712	-5.88203	4.05261e-09	2.51964e-08	ENSG00000169100.14_PAR_Y_SLC25A6	down	YES
661.355	-0.331964	0.0564421	-5.8815	4.06572e-09	2.52644e-08	ENSG00000099204.20_ABLIM1	down	YES
4641.99	-0.160972	0.0273757	-5.88011	4.10004e-09	2.54642e-08	ENSG00000087074.8_PPP1R15A	down	YES
4244.85	-0.190665	0.032438	-5.87783	4.15673e-09	2.57889e-08	ENSG00000141522.12_ARHGDIA	down	YES
109.42	0.777953	0.132353	5.87785	4.15642e-09	2.57889e-08	ENSG00000150687.12_PRSS23	up	YES
1098.36	-0.27246	0.0463725	-5.87547	4.21651e-09	2.61459e-08	ENSG00000007923.16_DNAJC11	down	YES
806.081	0.305869	0.052087	5.87228	4.29842e-09	2.66397e-08	ENSG00000007541.17_PIGQ	up	YES
261.598	0.507538	0.086471	5.86947	4.37201e-09	2.70814e-08	ENSG00000196743.9_GM2A	up	YES
3156.18	0.184687	0.0314787	5.86705	4.43615e-09	2.74642e-08	ENSG00000136295.15_TTYH3	up	YES
504.664	0.379521	0.0647255	5.86355	4.53064e-09	2.80344e-08	ENSG00000164307.13_ERAP1	up	YES
3008.89	-0.191007	0.0326022	-5.85871	4.66463e-09	2.88387e-08	ENSG00000107223.13_EDF1	down	YES
644.352	0.351939	0.0600714	5.85868	4.66556e-09	2.88387e-08	ENSG00000166822.13_TMEM170A	up	YES
339.247	0.447841	0.0764829	5.85544	4.75735e-09	2.93906e-08	ENSG00000162144.10_CYB561A3	up	YES
802.853	0.318887	0.0544981	5.85135	4.87602e-09	3.01078e-08	ENSG00000166619.15_BLCAP	up	YES
1208.19	-0.2771	0.0473703	-5.84966	4.92577e-09	3.0399e-08	ENSG00000173230.15_GOLGB1	down	YES
549.249	-0.355606	0.0608084	-5.84798	4.97583e-09	3.06917e-08	ENSG00000163961.4_RNF168	down	YES
1696.47	0.228301	0.0390411	5.8477	4.98404e-09	3.071e-08	ENSG00000101608.13_MYL12A	up	YES
928.748	0.283617	0.0485001	5.84777	4.98202e-09	3.071e-08	ENSG00000173545.5_ZNF622	up	YES
524.923	0.37313	0.063821	5.84651	5.01987e-09	3.09145e-08	ENSG00000176623.12_RMDN1	up	YES
1184.02	0.258801	0.0442742	5.84541	5.05314e-09	3.1103e-08	ENSG00000178035.13_IMPDH2	up	YES
249.1	0.512211	0.0876997	5.84051	5.20413e-09	3.20155e-08	ENSG00000233532.6_LINC00460	up	YES
6115.45	0.147212	0.0252064	5.84024	5.21252e-09	3.20503e-08	ENSG00000130726.12_TRIM28	up	YES
1060.37	-0.273726	0.046886	-5.83812	5.27917e-09	3.24431e-08	ENSG00000068323.17_TFE3	down	YES
530.171	0.365738	0.0626507	5.83773	5.29159e-09	3.25023e-08	ENSG00000137100.16_DCTN3	up	YES
841.472	-0.305121	0.0522942	-5.83471	5.38854e-09	3.30804e-08	ENSG00000075413.19_MARK3	down	YES
712.823	-0.323817	0.0555144	-5.83302	5.44329e-09	3.3399e-08	ENSG00000103496.15_STX4	down	YES
148.771	0.656394	0.112651	5.82679	5.65031e-09	3.46511e-08	ENSG00000198246.9_SLC29A3	up	YES
2432.11	-0.218212	0.0374616	-5.82496	5.71278e-09	3.50158e-08	ENSG00000175137.11_SH3BP5L	down	YES
1085.03	-0.279684	0.0480406	-5.82183	5.82065e-09	3.56584e-08	ENSG00000073614.13_KDM5A	down	YES
556.824	-0.400582	0.0688276	-5.82007	5.88215e-09	3.60162e-08	ENSG00000145734.19_BDP1	down	YES
487.476	0.411086	0.070658	5.81797	5.95655e-09	3.64527e-08	ENSG00000198053.12_SIRPA	up	YES
542.813	0.357874	0.0615294	5.8163	6.01634e-09	3.67994e-08	ENSG00000173706.14_HEG1	up	YES
422.04	-0.408853	0.0703437	-5.81222	6.16508e-09	3.76894e-08	ENSG00000119397.18_CNTRL	down	YES
337.938	0.46482	0.0799995	5.81028	6.23681e-09	3.81081e-08	ENSG00000172428.11_COPS9	up	YES
1543.95	-0.230687	0.0397163	-5.80836	6.30889e-09	3.85083e-08	ENSG00000100304.13_TTLL12	down	YES
930.525	-0.28595	0.0492305	-5.80838	6.30784e-09	3.85083e-08	ENSG00000145494.12_NDUFS6	down	YES
854.485	0.294079	0.0506552	5.80551	6.41703e-09	3.91479e-08	ENSG00000140740.11_UQCRC2	up	YES
554.246	0.35055	0.0603969	5.80411	6.47105e-09	3.94569e-08	ENSG00000140307.11_GTF2A2	up	YES
720.077	-0.319771	0.0551071	-5.80271	6.52512e-09	3.97659e-08	ENSG00000167716.19_WDR81	down	YES
479.432	-0.38881	0.0670076	-5.80247	6.53436e-09	3.98014e-08	ENSG00000160218.13_TRAPPC10	down	YES
857.563	-0.328055	0.0565711	-5.79899	6.67154e-09	4.06159e-08	ENSG00000151914.21_DST	down	YES
930.933	-0.284545	0.0490871	-5.79673	6.76202e-09	4.11453e-08	ENSG00000125834.13_STK35	down	YES
749.472	0.303642	0.0523943	5.79534	6.81843e-09	4.1467e-08	ENSG00000211450.10_SELENOH	up	YES
66.4471	1.18326	0.204185	5.79506	6.82985e-09	4.15149e-08	ENSG00000259661.1_AC068831.15	up	YES
2129.26	-0.203205	0.0350737	-5.79366	6.88707e-09	4.18409e-08	ENSG00000124214.21_STAU1	down	YES
184.945	0.591608	0.10221	5.78817	7.1159e-09	4.32087e-08	ENSG00000243364.8_EFNA4	up	YES
827.629	0.293501	0.0507393	5.7845	7.27291e-09	4.41391e-08	ENSG00000160613.14_PCSK7	up	YES
2000.5	0.211323	0.0365515	5.7815	7.40367e-09	4.49095e-08	ENSG00000133657.16_ATP13A3	up	YES
415.276	0.397869	0.0688434	5.77933	7.49967e-09	4.54682e-08	ENSG00000055950.16_MRPL43	up	YES
486.444	0.391904	0.0678835	5.77318	7.77899e-09	4.71372e-08	ENSG00000155959.12_VBP1	up	YES
3025.33	-0.183328	0.0317604	-5.77221	7.82383e-09	4.73844e-08	ENSG00000168066.21_SF1	down	YES
372.557	0.43103	0.0746992	5.7702	7.91755e-09	4.79272e-08	ENSG00000103121.9_CMC2	up	YES
862.841	-0.309687	0.0537138	-5.76549	8.14208e-09	4.92609e-08	ENSG00000139725.8_RHOF	down	YES
1272.72	0.245032	0.042507	5.76451	8.18961e-09	4.95228e-08	ENSG00000132670.21_PTPRA	up	YES
2410.95	-0.195289	0.033879	-5.7643	8.19952e-09	4.95571e-08	ENSG00000100650.16_SRSF5	down	YES
794.538	-0.306507	0.0531916	-5.76232	8.2966e-09	5.01179e-08	ENSG00000159023.22_EPB41	down	YES
373.171	0.414378	0.0719134	5.76218	8.30366e-09	5.01347e-08	ENSG00000258289.10_CHURC1	up	YES
580.656	0.36686	0.0636729	5.76164	8.32991e-09	5.02673e-08	ENSG00000105223.20_PLD3	up	YES
330.768	0.450076	0.0781181	5.76148	8.33798e-09	5.029e-08	ENSG00000021574.13_SPAST	up	YES
293.375	0.470904	0.0817378	5.76115	8.35419e-09	5.03618e-08	ENSG00000119927.14_GPAM	up	YES
347.58	0.43423	0.0753898	5.7598	8.42153e-09	5.07416e-08	ENSG00000176597.12_B3GNT5	up	YES
310.608	-0.476569	0.0827641	-5.75816	8.50364e-09	5.121e-08	ENSG00000214425.8_LRRC37A4P	down	YES
983.623	-0.279227	0.0485053	-5.75663	8.58105e-09	5.16496e-08	ENSG00000177383.5_MAGEF1	down	YES
759.198	-0.320132	0.055663	-5.75125	8.85852e-09	5.32923e-08	ENSG00000131626.19_PPFIA1	down	YES
284.142	0.475405	0.0826844	5.74964	8.94348e-09	5.37758e-08	ENSG00000204977.10_TRIM13	up	YES
4530.24	-0.163233	0.0283932	-5.74902	8.97632e-09	5.39455e-08	ENSG00000260032.2_NORAD	down	YES
456.174	-0.38969	0.0678066	-5.74708	9.07959e-09	5.45382e-08	ENSG00000173064.14_HECTD4	down	YES
333.587	-0.44659	0.0777268	-5.74563	9.15767e-09	5.49789e-08	ENSG00000099940.12_SNAP29	down	YES
580.11	-0.340417	0.0592659	-5.74389	9.25248e-09	5.55196e-08	ENSG00000139436.21_GIT2	down	YES
1648.52	-0.218405	0.0380314	-5.74277	9.31411e-09	5.58608e-08	ENSG00000167657.14_DAPK3	down	YES
930.286	0.274296	0.0477904	5.73955	9.49285e-09	5.69036e-08	ENSG00000121900.19_TMEM54	up	YES
857.692	-0.286675	0.0499916	-5.73447	9.78178e-09	5.86055e-08	ENSG00000126464.14_PRR12	down	YES
3502.94	0.167509	0.0292157	5.73355	9.83513e-09	5.8895e-08	ENSG00000079246.16_XRCC5	up	YES
379.304	-0.414392	0.0722919	-5.7322	9.91388e-09	5.93362e-08	ENSG00000171853.16_TRAPPC12	down	YES
323.449	0.447753	0.0781282	5.731	9.98415e-09	5.97263e-08	ENSG00000027001.10_MIPEP	up	YES
912.499	0.300038	0.052384	5.72767	1.01819e-08	6.08778e-08	ENSG00000178741.12_COX5A	up	YES
634.892	-0.338739	0.0591643	-5.7254	1.03193e-08	6.16681e-08	ENSG00000100605.17_ITPK1	down	YES
1582.95	-0.228044	0.0399049	-5.71469	1.09903e-08	6.56442e-08	ENSG00000204843.13_DCTN1	down	YES
275.52	0.569916	0.0998206	5.7094	1.13373e-08	6.76823e-08	ENSG00000100372.15_SLC25A17	up	YES
226.9	-0.538941	0.09443	-5.70731	1.14776e-08	6.84853e-08	ENSG00000116127.20_ALMS1	down	YES
298045	0.491062	0.0860685	5.70548	1.16014e-08	6.91886e-08	ENSG00000198804.2_MT-CO1	up	YES
344.166	0.43063	0.0754847	5.70486	1.16438e-08	6.94063e-08	ENSG00000181773.7_GPR3	up	YES
100.706	0.779433	0.136698	5.70187	1.18502e-08	7.06003e-08	ENSG00000156869.14_FRRS1	up	YES
803.318	-0.298092	0.0522831	-5.70149	1.18763e-08	7.07198e-08	ENSG00000185298.13_CCDC137	down	YES
1056.09	0.257032	0.0450893	5.70051	1.1945e-08	7.10931e-08	ENSG00000140526.18_ABHD2	up	YES
6546	0.14743	0.0258652	5.69992	1.19861e-08	7.13013e-08	ENSG00000104904.12_OAZ1	up	YES
4330.99	0.435684	0.0764786	5.6968	1.22074e-08	7.25804e-08	ENSG00000110700.7_RPS13	up	YES
458.402	0.382678	0.0672401	5.69122	1.26132e-08	7.49551e-08	ENSG00000106868.17_SUSD1	up	YES
1238.52	-0.253463	0.04456	-5.68814	1.28433e-08	7.6284e-08	ENSG00000022840.17_RNF10	down	YES
357.119	0.452818	0.0796542	5.6848	1.30968e-08	7.77501e-08	ENSG00000198715.13_GLMP	up	YES
379.609	0.423954	0.0745887	5.68388	1.3167e-08	7.81273e-08	ENSG00000186908.15_ZDHHC17	up	YES
1050.73	-0.266076	0.0468168	-5.68335	1.32081e-08	7.83317e-08	ENSG00000078674.18_PCM1	down	YES
246.468	-0.50816	0.0894232	-5.68264	1.32633e-08	7.86191e-08	ENSG00000111912.20_NCOA7	down	YES
189.216	0.574808	0.1012	5.67995	1.34737e-08	7.98259e-08	ENSG00000153898.13_MCOLN2	up	YES
136.11	0.701676	0.123556	5.67903	1.35457e-08	8.02118e-08	ENSG00000104691.16_UBXN8	up	YES
1287.95	-0.250167	0.0440606	-5.67779	1.36448e-08	8.07578e-08	ENSG00000184007.22_PTP4A2	down	YES
408.907	0.402749	0.0709374	5.67752	1.36662e-08	8.08431e-08	ENSG00000286162.2_RP11-574F11.4	up	YES
837.623	-0.293806	0.0517606	-5.67625	1.37682e-08	8.14057e-08	ENSG00000004534.15_RBM6	down	YES
2535.17	-0.188787	0.0332996	-5.66933	1.43356e-08	8.46937e-08	ENSG00000099901.17_RANBP1	down	YES
624.96	0.331508	0.0584744	5.66929	1.43388e-08	8.46937e-08	ENSG00000197448.14_GSTK1	up	YES
315.671	0.4522	0.0797845	5.66776	1.44674e-08	8.54102e-08	ENSG00000144468.17_RHBDD1	up	YES
298.552	-0.473725	0.0836799	-5.66116	1.50352e-08	8.87176e-08	ENSG00000169499.15_PLEKHA2	down	YES
668.714	-0.333212	0.0588745	-5.65969	1.51645e-08	8.94354e-08	ENSG00000115568.16_ZNF142	down	YES
189.27	-0.678076	0.119823	-5.659	1.5226e-08	8.97529e-08	ENSG00000285628.1_RP11-1212A22.9	down	YES
1850.89	-0.210827	0.0372727	-5.65635	1.54629e-08	9.11033e-08	ENSG00000107404.20_DVL1	down	YES
645.072	-0.319903	0.056575	-5.65449	1.56308e-08	9.20464e-08	ENSG00000160445.11_ZER1	down	YES
3929.2	-0.163351	0.0288973	-5.6528	1.57852e-08	9.29088e-08	ENSG00000106263.18_EIF3B	down	YES
493.133	-0.362865	0.0642455	-5.6481	1.62228e-08	9.54363e-08	ENSG00000273604.2_EPOP	down	YES
1991.72	-0.215656	0.0382067	-5.64444	1.65716e-08	9.74392e-08	ENSG00000141503.17_MINK1	down	YES
713.723	0.302817	0.0536764	5.64153	1.68543e-08	9.9002e-08	ENSG00000120451.11_SNX19	up	YES
1671.38	-0.217885	0.0386213	-5.64158	1.685e-08	9.9002e-08	ENSG00000142453.12_CARM1	down	YES
51.461	1.11915	0.198553	5.63651	1.73527e-08	1.01879e-07	ENSG00000162976.13_SLC66A3	up	YES
969.453	-0.288774	0.0512696	-5.63246	1.77652e-08	1.04248e-07	ENSG00000141568.21_FOXK2	down	YES
1100.72	-0.255799	0.0454265	-5.63106	1.79109e-08	1.0505e-07	ENSG00000198218.11_QRICH1	down	YES
101.062	0.773645	0.137522	5.62561	1.84854e-08	1.08366e-07	ENSG00000145882.11_PCYOX1L	up	YES
539.706	0.361663	0.0643129	5.6235	1.87127e-08	1.09643e-07	ENSG00000170632.14_ARMC10	up	YES
948.149	-0.27186	0.0483699	-5.62044	1.9047e-08	1.11546e-07	ENSG00000175727.14_MLXIP	down	YES
3454.57	0.170952	0.0304271	5.61842	1.92712e-08	1.12803e-07	ENSG00000124193.16_SRSF6	up	YES
[truncated: 9,702 more rows]

## Sheet: RNAseq_stats_EHMT2_KO_DLD1
baseMean	log2FoldChange	lfcSE	stat	pvalue	padj	ID	dir	Significance
5527.27	-1.14448	0.0285521	-40.0841	0	0	ENSG00000125740.14_FOSB	down	YES
4690.13	1.45246	0.0303841	47.8033	0	0	ENSG00000163735.7_CXCL5	up	YES
82537.9	-1.0145	0.0204252	-49.6689	0	0	ENSG00000198712.1_MT-CO2	down	YES
29760.4	-1.07715	0.0218296	-49.3437	0	0	ENSG00000198840.2_MT-ND3	down	YES
67597.3	-1.16857	0.0203205	-57.5067	0	0	ENSG00000210082.2_MT-RNR2	down	YES
11187.9	-1.66224	0.0251561	-66.0773	0	0	ENSG00000212907.2_MT-ND4L	down	YES
36024.3	-1.03765	0.0241927	-42.8911	0	0	ENSG00000245532.9_NEAT1	down	YES
7768.51	-1.27091	0.0270125	-47.0489	0	0	ENSG00000248527.1_MTATP6P1	down	YES
10207.9	-0.868693	0.0258553	-33.5982	1.78006e-247	2.48477e-244	ENSG00000072778.20_ACADVL	down	YES
3109.29	-1.11518	0.0335302	-33.259	1.51069e-242	1.89787e-239	ENSG00000169116.11_PARM1	down	YES
8079.31	-0.892142	0.0269632	-33.0874	4.51852e-240	5.16056e-237	ENSG00000167615.17_LENG8	down	YES
6012.96	-1.11575	0.0337927	-33.0174	4.57245e-239	4.78697e-236	ENSG00000142102.16_PGGHG	down	YES
1440.29	-1.45431	0.0450515	-32.281	1.29113e-228	1.24773e-225	ENSG00000255026.1_RP11-326C3.2	down	YES
1477.17	-1.37771	0.0431288	-31.9441	6.52674e-224	5.85682e-221	ENSG00000092969.12_TGFB2	down	YES
5319.07	0.887869	0.0287815	30.8486	5.85192e-209	4.90118e-206	ENSG00000145425.10_RPS3A	up	YES
4584.4	-0.888423	0.028996	-30.6395	3.64863e-206	2.86486e-203	ENSG00000221978.12_CCNL2	down	YES
2613.29	1.19745	0.0392005	30.5468	6.24194e-205	4.61279e-202	ENSG00000052802.13_MSMO1	up	YES
1656.57	1.41209	0.0464003	30.4328	2.02334e-203	1.41218e-200	ENSG00000134202.11_GSTM3	up	YES
8629.91	-1.24784	0.0410142	-30.4247	2.59252e-203	1.7142e-200	ENSG00000211459.2_MT-RNR1	down	YES
959.182	-1.5149	0.0518738	-29.2036	1.74491e-187	1.09606e-184	ENSG00000204371.11_EHMT2	down	YES
1411.38	1.25627	0.0438029	28.68	6.77524e-181	4.05321e-178	ENSG00000174938.15_SEZ6L2	up	YES
9834.39	0.948761	0.0341807	27.7572	1.4256e-169	8.14081e-167	ENSG00000205542.11_TMSB4X	up	YES
906.596	-1.56412	0.0581751	-26.8865	3.16157e-159	1.72691e-156	ENSG00000130600.19_H19	down	YES
1434.09	-1.13698	0.0431603	-26.3432	6.14295e-153	3.21558e-150	ENSG00000267519.6_MIR23AHG	down	YES
2866.67	0.879616	0.0337896	26.0322	2.14221e-149	1.0765e-146	ENSG00000272398.6_CD24	up	YES
2568.21	-1.05199	0.041024	-25.6433	5.01941e-145	2.42534e-142	ENSG00000167702.13_KIFC2	down	YES
1751.16	-1.05103	0.0413294	-25.4305	1.15991e-142	5.39702e-140	ENSG00000197774.14_EME2	down	YES
1933.39	-0.955496	0.0378794	-25.2247	2.14798e-140	9.63753e-138	ENSG00000138834.14_MAPK8IP3	down	YES
2433.19	-0.913371	0.0367334	-24.8649	1.78412e-136	7.72892e-134	ENSG00000107281.10_NPDC1	down	YES
6032.75	-0.680494	0.0274752	-24.7676	2.00404e-135	8.39225e-133	ENSG00000182087.14_TMEM259	down	YES
345.996	2.27052	0.0921458	24.6405	4.64987e-134	1.8844e-131	ENSG00000148677.7_ANKRD1	up	YES
2820.37	-0.951644	0.0387488	-24.5593	3.43777e-133	1.34965e-130	ENSG00000103888.17_CEMIP	down	YES
1777.19	-0.951734	0.0389255	-24.4502	5.01243e-132	1.90822e-129	ENSG00000146830.11_GIGYF1	down	YES
2307.24	0.916524	0.0375001	24.4406	6.33865e-132	2.34213e-129	ENSG00000135046.14_ANXA1	up	YES
3412.23	0.784626	0.0322006	24.3668	3.84513e-131	1.38018e-128	ENSG00000079459.13_FDFT1	up	YES
1838.02	-0.975011	0.0401147	-24.3056	1.71117e-130	5.97152e-128	ENSG00000005206.17_SPPL2B	down	YES
3237.24	0.800973	0.0330692	24.2211	1.33303e-129	4.52618e-127	ENSG00000070669.17_ASNS	up	YES
3503.01	-0.795342	0.0334688	-23.7637	7.93513e-125	2.62339e-122	ENSG00000163435.16_ELF3	down	YES
85435.6	-0.801154	0.0341631	-23.4509	1.29557e-121	4.1734e-119	ENSG00000198938.2_MT-CO3	down	YES
175664	-0.955445	0.0407705	-23.4347	1.8933e-121	5.94638e-119	ENSG00000198804.2_MT-CO1	down	YES
2365.37	0.835041	0.0356502	23.4232	2.48006e-121	7.59927e-119	ENSG00000138772.13_ANXA3	up	YES
2845.57	0.822914	0.0354888	23.188	6.01841e-119	1.80022e-116	ENSG00000173391.9_OLR1	up	YES
2249.61	0.95453	0.0414983	23.0016	4.48878e-117	1.31145e-114	ENSG00000168374.11_ARF4	up	YES
1403.21	1.04002	0.0452514	22.9832	6.86508e-117	1.96014e-114	ENSG00000106460.19_TMEM106B	up	YES
6159.67	0.653193	0.0286443	22.8036	4.22424e-115	1.17931e-112	ENSG00000168028.14_RPSA	up	YES
1228.98	-1.05534	0.0463989	-22.7448	1.61488e-114	4.41038e-112	ENSG00000123358.20_NR4A1	down	YES
3615.98	0.694006	0.0310296	22.3659	8.44832e-111	2.25822e-108	ENSG00000115484.15_CCT4	up	YES
8450.11	0.597065	0.0270438	22.0777	5.18199e-108	1.35628e-105	ENSG00000013588.9_GPRC5A	up	YES
105538	0.438219	0.0198603	22.0651	6.84464e-108	1.75488e-105	ENSG00000156508.19_EEF1A1	up	YES
2876.87	-0.770473	0.0349249	-22.0608	7.52102e-108	1.88973e-105	ENSG00000173209.23_AHSA2P	down	YES
2985.13	-0.731536	0.033471	-21.8558	6.84532e-106	1.68623e-103	ENSG00000065361.17_ERBB3	down	YES
1072.91	-1.05325	0.0482128	-21.8459	8.50239e-106	2.05414e-103	ENSG00000185101.13_ANO9	down	YES
4415.75	-0.742444	0.0340794	-21.7857	3.17116e-105	7.51684e-103	ENSG00000099622.14_CIRBP	down	YES
1313.55	-0.986479	0.0453468	-21.7541	6.32007e-105	1.47035e-102	ENSG00000070182.21_SPTB	down	YES
5655.57	-0.589651	0.0272366	-21.6492	6.18566e-104	1.41292e-101	ENSG00000112715.25_VEGFA	down	YES
5369.63	-0.616873	0.0285905	-21.5761	3.00915e-103	6.7507e-101	ENSG00000108846.16_ABCC3	down	YES
8311.29	0.675044	0.0312958	21.5698	3.45003e-103	7.60399e-101	ENSG00000143933.19_CALM2	up	YES
1430.12	-0.912806	0.0425201	-21.4676	3.12635e-102	6.77179e-100	ENSG00000244257.5_PKD1P1	down	YES
1527.52	0.917252	0.0428588	21.4017	1.28686e-101	2.74015e-99	ENSG00000164111.15_ANXA5	up	YES
6227.45	-0.566765	0.0266268	-21.2855	1.54742e-100	3.24004e-98	ENSG00000168646.13_AXIN2	down	YES
1451.06	-0.887904	0.0417842	-21.2498	3.31269e-100	6.82251e-98	ENSG00000184916.9_JAG2	down	YES
1945.27	-0.829142	0.0391839	-21.1603	2.21816e-99	4.49464e-97	ENSG00000108773.11_KAT2A	down	YES
1086.64	-1.05628	0.0502034	-21.04	2.82112e-98	5.62567e-96	ENSG00000204681.11_GABBR1	down	YES
1685.79	0.836646	0.0401987	20.8128	3.31526e-96	6.50774e-94	ENSG00000065833.9_ME1	up	YES
1463.46	-0.929308	0.0447286	-20.7766	7.04918e-96	1.36244e-93	ENSG00000127418.15_FGFRL1	down	YES
2433.77	-0.777203	0.037456	-20.7498	1.2322e-95	2.34547e-93	ENSG00000196187.12_TMEM63A	down	YES
14997.8	-0.525175	0.025438	-20.6453	1.07552e-94	2.01669e-92	ENSG00000177106.16_EPS8L2	down	YES
719.941	-1.20975	0.0590059	-20.5022	2.05935e-93	3.80465e-91	ENSG00000225697.13_SLC26A6	down	YES
3879.23	-0.625703	0.0308955	-20.2523	3.39322e-91	6.17811e-89	ENSG00000100836.11_PABPN1	down	YES
1476.76	-0.844986	0.0418948	-20.1692	1.82437e-90	3.27422e-88	ENSG00000140400.17_MAN2C1	down	YES
886.292	1.15384	0.0572727	20.1465	2.89029e-90	5.11418e-88	ENSG00000173702.7_MUC13	up	YES
3171.08	-0.649417	0.0323691	-20.0628	1.55893e-89	2.72012e-87	ENSG00000100941.9_PNN	down	YES
1796.97	0.807396	0.040327	20.0212	3.59631e-89	6.1891e-87	ENSG00000105835.13_NAMPT	up	YES
1551.35	-0.831848	0.0421685	-19.7268	1.27025e-86	2.15651e-84	ENSG00000276550.4_HERC2P2	down	YES
2635.73	-0.669785	0.0339664	-19.719	1.47988e-86	2.4789e-84	ENSG00000167608.12_TMC4	down	YES
4096.35	-0.591496	0.030216	-19.5756	2.49631e-85	4.12647e-83	ENSG00000178252.18_WDR6	down	YES
1857.29	-0.768526	0.0392821	-19.5643	3.11824e-85	5.08759e-83	ENSG00000159314.11_ARHGAP27	down	YES
768.875	-1.10837	0.0566997	-19.5482	4.27612e-85	6.88729e-83	ENSG00000225138.8_SLC9A3-AS1	down	YES
2022.59	-0.768785	0.0394734	-19.476	1.75338e-84	2.78832e-82	ENSG00000053747.17_LAMA3	down	YES
6395.91	0.547462	0.0281291	19.4625	2.28588e-84	3.58969e-82	ENSG00000120885.22_CLU	up	YES
1909.8	-0.756697	0.0390124	-19.3963	8.28863e-84	1.28556e-81	ENSG00000134884.15_ARGLU1	down	YES
1067.73	-0.957455	0.0495475	-19.324	3.3773e-83	5.17427e-81	ENSG00000143416.21_SELENBP1	down	YES
626.503	-1.18774	0.0614729	-19.3214	3.54969e-83	5.37286e-81	ENSG00000123104.12_ITPR2	down	YES
706.892	-1.24243	0.0651144	-19.0808	3.64785e-81	5.4557e-79	ENSG00000214425.8_LRRC37A4P	down	YES
3215.03	-0.807405	0.0423191	-19.079	3.77507e-81	5.57955e-79	ENSG00000008710.20_PKD1	down	YES
2723.53	-0.681513	0.0357821	-19.0462	7.06202e-81	1.03163e-78	ENSG00000105443.15_CYTH2	down	YES
1623.72	-0.815241	0.0428084	-19.044	7.37257e-81	1.06462e-78	ENSG00000274012.1_RN7SL2	down	YES
3559.16	0.597758	0.0314044	19.0342	8.88231e-81	1.26805e-78	ENSG00000086598.11_TMED2	up	YES
2071	0.723565	0.0382102	18.9364	5.71549e-80	8.06783e-78	ENSG00000117525.14_F3	up	YES
673.813	-1.17483	0.0622043	-18.8867	1.46781e-79	2.0489e-77	ENSG00000254815.6_LMNTD2-AS1	down	YES
1576.13	-0.759749	0.0402608	-18.8707	1.98608e-79	2.74189e-77	ENSG00000213983.12_AP1G2	down	YES
4846.45	0.562754	0.0298284	18.8664	2.15552e-79	2.94346e-77	ENSG00000181019.13_NQO1	up	YES
893.557	-1.00455	0.0535544	-18.7575	1.68164e-78	2.27166e-76	ENSG00000266086.3_RP11-159D12.5	down	YES
3876.79	-0.62337	0.033284	-18.7288	2.88186e-78	3.85157e-76	ENSG00000104852.15_SNRNP70	down	YES
2135.25	-0.677024	0.0361524	-18.727	2.98525e-78	3.94776e-76	ENSG00000006282.21_SPATA20	down	YES
2282.51	-0.739609	0.0399579	-18.5097	1.72472e-76	2.25705e-74	ENSG00000148341.18_SH3GLB2	down	YES
11665.2	0.588741	0.0318234	18.5003	2.05408e-76	2.66035e-74	ENSG00000182718.18_ANXA2	up	YES
3446.98	-0.587465	0.0318707	-18.4328	7.17104e-76	9.19284e-74	ENSG00000120093.12_HOXB3	down	YES
1684.52	-0.762572	0.0413917	-18.4233	8.54492e-76	1.08434e-73	ENSG00000010322.16_NISCH	down	YES
4147.15	0.541599	0.0294807	18.3713	2.23082e-75	2.80258e-73	ENSG00000135069.14_PSAT1	up	YES
2157.31	-0.694082	0.0378242	-18.3502	3.28652e-75	4.08797e-73	ENSG00000107331.17_ABCA2	down	YES
259.788	-1.75488	0.0957808	-18.3219	5.53956e-75	6.82289e-73	ENSG00000273066.5_RP11-216L13.19	down	YES
411.679	-1.40791	0.0770393	-18.2753	1.30251e-74	1.58869e-72	ENSG00000225630.1_MTND2P28	down	YES
3822.57	-0.675621	0.037086	-18.2177	3.73679e-74	4.51397e-72	ENSG00000064651.14_SLC12A2	down	YES
969.025	0.927148	0.0510246	18.1706	8.81959e-74	1.05524e-71	ENSG00000127324.9_TSPAN8	up	YES
4323.01	0.535903	0.0295134	18.158	1.1102e-73	1.3158e-71	ENSG00000198431.16_TXNRD1	up	YES
244.281	1.80893	0.100082	18.0745	5.06502e-73	5.9469e-71	ENSG00000197635.11_DPP4	up	YES
580.793	-1.15442	0.0639092	-18.0634	6.1903e-73	7.20081e-71	ENSG00000154358.23_OBSCN	down	YES
1293.28	-0.803647	0.0444998	-18.0596	6.63211e-73	7.64396e-71	ENSG00000205517.13_RGL3	down	YES
69029.1	-1.16737	0.0649268	-17.9797	2.80886e-72	3.20798e-70	ENSG00000198888.2_MT-ND1	down	YES
2472.27	0.632555	0.0352139	17.9632	3.78191e-72	4.28037e-70	ENSG00000160752.15_FDPS	up	YES
742.375	-1.00948	0.0562171	-17.9568	4.24887e-72	4.76594e-70	ENSG00000108352.13_RAPGEFL1	down	YES
969.745	-0.89046	0.0497306	-17.9057	1.06503e-71	1.18407e-69	ENSG00000132793.12_LPIN3	down	YES
2626.35	-0.61695	0.034557	-17.8531	2.7348e-71	3.0138e-69	ENSG00000108848.16_LUC7L3	down	YES
1293.8	-0.84571	0.0474705	-17.8155	5.35963e-71	5.85505e-69	ENSG00000164050.13_PLXNB1	down	YES
6336	0.495314	0.0279037	17.7508	1.69881e-70	1.83984e-68	ENSG00000180398.13_MCFD2	up	YES
16486.1	0.440356	0.0248193	17.7425	1.97062e-70	2.11597e-68	ENSG00000150687.12_PRSS23	up	YES
1917.46	-0.800269	0.0453827	-17.6338	1.3557e-69	1.44337e-67	ENSG00000183458.14_PKD1P3	down	YES
3592.51	-0.554254	0.0314524	-17.622	1.67092e-69	1.76401e-67	ENSG00000168906.13_MAT2A	down	YES
4266.1	-0.552304	0.0315776	-17.4904	1.69669e-68	1.77629e-66	ENSG00000170345.10_FOS	down	YES
163.975	2.2598	0.129647	17.4303	4.8563e-68	5.04213e-66	ENSG00000102271.14_KLHL4	up	YES
1601.01	-0.827155	0.0474995	-17.414	6.46482e-68	6.65718e-66	ENSG00000128159.12_TUBGCP6	down	YES
780.529	-0.973266	0.0559207	-17.4044	7.64044e-68	7.80381e-66	ENSG00000101104.13_PABPC1L	down	YES
697.364	-0.991429	0.0570043	-17.3922	9.45514e-68	9.57943e-66	ENSG00000162591.16_MEGF6	down	YES
9756.31	-0.611851	0.0352116	-17.3764	1.24475e-67	1.25102e-65	ENSG00000167978.17_SRRM2	down	YES
701.597	-0.977362	0.0564267	-17.3209	3.27066e-67	3.26106e-65	ENSG00000266714.9_MYO15B	down	YES
15594.1	-0.44829	0.0259091	-17.3024	4.51043e-67	4.46177e-65	ENSG00000135486.19_HNRNPA1	down	YES
1719.88	-0.793761	0.0459937	-17.2581	9.73174e-67	9.55155e-65	ENSG00000095564.14_BTAF1	down	YES
977.839	0.876544	0.050837	17.2422	1.28005e-66	1.24661e-64	ENSG00000165672.7_PRDX3	up	YES
1092.82	-0.885463	0.0516163	-17.1547	5.79393e-66	5.59917e-64	ENSG00000254681.6_PKD1P5	down	YES
99660.8	-1.21659	0.0709526	-17.1466	6.66526e-66	6.39203e-64	ENSG00000198763.3_MT-ND2	down	YES
1723.05	-0.738477	0.0431732	-17.105	1.36245e-65	1.2967e-63	ENSG00000064607.17_SUGP2	down	YES
364.578	-1.35879	0.0795095	-17.0897	1.77087e-65	1.67274e-63	ENSG00000162576.17_MXRA8	down	YES
235.103	1.73506	0.101602	17.0771	2.19902e-65	2.06166e-63	ENSG00000079215.15_SLC1A3	up	YES
3709.42	-0.593641	0.0347706	-17.0731	2.35411e-65	2.19072e-63	ENSG00000147162.14_OGT	down	YES
2344.51	-0.621014	0.0364259	-17.0487	3.57449e-65	3.30194e-63	ENSG00000099814.16_CEP170B	down	YES
2811.65	-0.574639	0.0337525	-17.0251	5.35202e-65	4.90784e-63	ENSG00000170004.18_CHD3	down	YES
3312.66	-0.541967	0.0318734	-17.0038	7.70179e-65	7.01142e-63	ENSG00000141503.17_MINK1	down	YES
1100.45	-0.841335	0.0495418	-16.9823	1.10987e-64	1.00312e-62	ENSG00000178188.15_SH2B1	down	YES
1633.75	0.703744	0.0414582	16.9748	1.26157e-64	1.13208e-62	ENSG00000054983.17_GALC	up	YES
866.161	-0.873613	0.0515196	-16.9569	1.71141e-64	1.52486e-62	ENSG00000088340.17_FER1L4	down	YES
694.844	-0.961593	0.0568195	-16.9236	3.01251e-64	2.66523e-62	ENSG00000127415.13_IDUA	down	YES
1937.91	0.664652	0.0393494	16.891	5.23646e-64	4.60039e-62	ENSG00000237550.5_RPL9P9	up	YES
943.218	-0.892761	0.052932	-16.8662	7.97682e-64	6.95922e-62	ENSG00000177685.17_CRACR2B	down	YES
2033.26	-0.627873	0.0373184	-16.8247	1.60746e-63	1.39272e-61	ENSG00000198952.8_SMG5	down	YES
674.945	-0.983509	0.0584751	-16.8193	1.76297e-63	1.517e-61	ENSG00000272752.6_STAG3L5P-PVRIG2P-PILRB	down	YES
1291.2	-0.745859	0.0443656	-16.8117	2.00423e-63	1.71286e-61	ENSG00000124181.14_PLCG1	down	YES
1159.51	0.778718	0.0463693	16.7938	2.7085e-63	2.29911e-61	ENSG00000144063.4_MALL	up	YES
1482.66	-0.700267	0.0417327	-16.7798	3.42874e-63	2.89095e-61	ENSG00000140332.17_TLE3	down	YES
3537.22	0.546243	0.032618	16.7467	5.98884e-63	5.01586e-61	ENSG00000134333.14_LDHA	up	YES
13767.7	0.582974	0.0348333	16.7361	7.14888e-63	5.94777e-61	ENSG00000133112.17_TPT1	up	YES
3260.87	0.600976	0.0359406	16.7214	9.1608e-63	7.57152e-61	ENSG00000035862.12_TIMP2	up	YES
52407.1	-1.21124	0.0729811	-16.5966	7.37749e-62	6.05774e-60	ENSG00000198786.2_MT-ND5	down	YES
5523.52	0.474453	0.0287066	16.5276	2.32105e-61	1.89346e-59	ENSG00000108953.17_YWHAE	up	YES
655.687	-0.965231	0.0585626	-16.482	4.94021e-61	4.00412e-59	ENSG00000171680.23_PLEKHG5	down	YES
937.699	-0.838725	0.0509421	-16.4643	6.62316e-61	5.33376e-59	ENSG00000180902.18_D2HGDH	down	YES
4794.55	0.52762	0.0321999	16.3858	2.41682e-60	1.93391e-58	ENSG00000114391.13_RPL24	up	YES
12697.8	0.388004	0.023684	16.3825	2.54912e-60	2.02687e-58	ENSG00000117394.24_SLC2A1	up	YES
189.386	-1.80258	0.110236	-16.352	4.21017e-60	3.32656e-58	ENSG00000068078.20_FGFR3	down	YES
836.925	-0.895469	0.0548538	-16.3247	6.59152e-60	5.17558e-58	ENSG00000214021.16_TTLL3	down	YES
1233.89	-0.733401	0.0449533	-16.3147	7.75374e-60	6.05033e-58	ENSG00000272734.1_ADIRF-AS1	down	YES
130.902	5.7308	0.352018	16.2798	1.37216e-59	1.0641e-57	ENSG00000151790.9_TDO2	up	YES
969.119	0.836213	0.0515379	16.2252	3.34593e-59	2.57883e-57	ENSG00000134291.12_TMEM106C	up	YES
1991.99	-1.4982	0.0924112	-16.2123	4.12689e-59	3.16135e-57	ENSG00000215182.8_MUC5AC	down	YES
2027.15	-0.598921	0.0370337	-16.1723	7.90487e-59	6.01872e-57	ENSG00000108465.15_CDK5RAP3	down	YES
3600.91	-0.493051	0.0306345	-16.0946	2.78285e-58	2.10608e-56	ENSG00000067082.15_KLF6	down	YES
1120.41	-0.798231	0.0496684	-16.0712	4.06076e-58	3.05481e-56	ENSG00000196943.14_NOP9	down	YES
77367.4	-1.10815	0.069083	-16.0409	6.61902e-58	4.94968e-56	ENSG00000198727.2_MT-CYB	down	YES
135408	-1.14416	0.0718465	-15.925	4.24685e-57	3.15699e-55	ENSG00000198886.2_MT-ND4	down	YES
775.92	-0.858932	0.0539446	-15.9225	4.4242e-57	3.26948e-55	ENSG00000160781.17_PAQR6	down	YES
3090.8	0.526378	0.0330606	15.9216	4.48418e-57	3.29443e-55	ENSG00000152234.16_ATP5F1A	up	YES
588.206	-1.01974	0.0641679	-15.8917	7.23612e-57	5.28531e-55	ENSG00000005379.17_TSPOAP1	down	YES
1298.28	-0.71676	0.0451215	-15.8851	8.03289e-57	5.83336e-55	ENSG00000198198.17_SZT2	down	YES
220.491	-1.61322	0.10159	-15.8798	8.75182e-57	6.31891e-55	ENSG00000168453.16_HR	down	YES
3634.96	-0.51378	0.0323727	-15.8708	1.00932e-56	7.24577e-55	ENSG00000100813.15_ACIN1	down	YES
1049.07	0.848189	0.0536905	15.7978	3.22382e-56	2.30118e-54	ENSG00000100902.11_PSMA6	up	YES
4143.57	0.588887	0.0373817	15.7533	6.51378e-56	4.62331e-54	ENSG00000164587.13_RPS14	up	YES
2096.35	-0.662975	0.0420909	-15.751	6.75774e-56	4.76952e-54	ENSG00000135968.21_GCC2	down	YES
2341.77	0.562749	0.0357523	15.7402	8.01621e-56	5.62612e-54	ENSG00000167553.16_TUBA1C	up	YES
697.218	-0.894772	0.0568824	-15.7302	9.38796e-56	6.55228e-54	ENSG00000185189.18_NRBP2	down	YES
2502.38	-0.553032	0.0352776	-15.6766	2.18721e-55	1.51812e-53	ENSG00000167880.8_EVPL	down	YES
573.492	-0.964063	0.0615438	-15.6647	2.6382e-55	1.82108e-53	ENSG00000182796.14_TMEM198B	down	YES
3760.62	0.484199	0.0309845	15.6272	4.75449e-55	3.26397e-53	ENSG00000156976.17_EIF4A2	up	YES
2215.57	0.58766	0.0376162	15.6225	5.11595e-55	3.49303e-53	ENSG00000171314.9_PGAM1	up	YES
8316.93	-0.404234	0.0258822	-15.6182	5.47249e-55	3.71626e-53	ENSG00000108654.16_DDX5	down	YES
1205.38	0.729049	0.0466918	15.6141	5.8404e-55	3.94478e-53	ENSG00000129084.18_PSMA1	up	YES
2321.39	0.602182	0.0385838	15.6071	6.51095e-55	4.37417e-53	ENSG00000169908.12_TM4SF1	up	YES
4627.89	0.482774	0.0309529	15.5971	7.6205e-55	5.09236e-53	ENSG00000115310.18_RTN4	up	YES
736.239	-0.898139	0.057625	-15.5859	9.07326e-55	6.03108e-53	ENSG00000164855.16_TMEM184A	down	YES
2463.1	-0.536994	0.0344978	-15.566	1.23851e-54	8.18916e-53	ENSG00000132424.17_PNISR	down	YES
7617.46	0.628189	0.0403823	15.556	1.44764e-54	9.52186e-53	ENSG00000170315.14_UBB	up	YES
678.38	0.887009	0.0571068	15.5325	2.09175e-54	1.36868e-52	ENSG00000089472.17_HEPH	up	YES
4843.45	0.616028	0.0396799	15.525	2.35167e-54	1.53078e-52	ENSG00000131469.15_RPL27	up	YES
4601.02	0.487743	0.0314317	15.5176	2.63809e-54	1.70837e-52	ENSG00000130164.14_LDLR	up	YES
1161.98	-0.701661	0.045414	-15.4503	7.50739e-54	4.83669e-52	ENSG00000104859.15_CLASRP	down	YES
1165.97	-0.706819	0.0458304	-15.4225	1.15552e-53	7.40653e-52	ENSG00000215041.10_NEURL4	down	YES
6655.34	-0.453528	0.0294249	-15.4131	1.33652e-53	8.52321e-52	ENSG00000172037.14_LAMB2	down	YES
1596.02	-0.658421	0.0427748	-15.3927	1.83111e-53	1.16183e-51	ENSG00000137504.15_CREBZF	down	YES
1449.66	0.645597	0.0419901	15.375	2.41011e-53	1.52152e-51	ENSG00000070831.17_CDC42	up	YES
776.516	-0.828214	0.0538725	-15.3736	2.46137e-53	1.54611e-51	ENSG00000167280.17_ENGASE	down	YES
3236.18	-0.516054	0.0335787	-15.3685	2.66308e-53	1.66449e-51	ENSG00000138668.19_HNRNPD	down	YES
654.457	-0.925242	0.0603293	-15.3365	4.35914e-53	2.71108e-51	ENSG00000196123.13_KIAA0895L	down	YES
223.065	1.54355	0.101068	15.2724	1.16814e-52	7.22925e-51	ENSG00000176697.20_BDNF	up	YES
627.498	0.902216	0.0590963	15.2669	1.27108e-52	7.82774e-51	ENSG00000119326.15_CTNNAL1	up	YES
1816.54	-0.606598	0.0397353	-15.266	1.28878e-52	7.898e-51	ENSG00000047410.14_TPR	down	YES
360.311	1.19009	0.07802	15.2537	1.55513e-52	9.48401e-51	ENSG00000105409.19_ATP1A3	up	YES
438.896	1.06813	0.0701288	15.231	2.20053e-52	1.33552e-50	ENSG00000106366.9_SERPINE1	up	YES
3651.05	0.463653	0.0304625	15.2205	2.58714e-52	1.56261e-50	ENSG00000080822.17_CLDND1	up	YES
907.957	-0.770853	0.0506661	-15.2144	2.8395e-52	1.70683e-50	ENSG00000163945.19_UVSSA	down	YES
1587.55	-0.607863	0.0399618	-15.2111	2.98543e-52	1.786e-50	ENSG00000077044.11_DGKD	down	YES
3392.27	-0.481291	0.0316447	-15.2092	3.07095e-52	1.82845e-50	ENSG00000275023.5_MLLT6	down	YES
822.613	-0.788211	0.0518356	-15.206	3.22669e-52	1.91212e-50	ENSG00000135473.15_PAN2	down	YES
1120.37	-0.691407	0.0455238	-15.1878	4.25885e-52	2.51192e-50	ENSG00000103168.17_TAF1C	down	YES
8540.41	0.40704	0.0268619	15.153	7.23308e-52	4.24622e-50	ENSG00000164924.18_YWHAZ	up	YES
640.351	-0.878249	0.0580558	-15.1277	1.06408e-51	6.2177e-50	ENSG00000188549.12_CCDC9B	down	YES
1672.54	-0.619086	0.0410162	-15.0937	1.78186e-51	1.03637e-49	ENSG00000109046.15_WSB1	down	YES
3984.24	0.458876	0.0304107	15.0893	1.90426e-51	1.10245e-49	ENSG00000123989.14_CHPF	up	YES
2777.57	-0.51414	0.0340899	-15.0819	2.12997e-51	1.22747e-49	ENSG00000165458.14_INPPL1	down	YES
1232.16	0.671961	0.0446012	15.066	2.71096e-51	1.55515e-49	ENSG00000165376.12_CLDN2	up	YES
2473.13	-0.542936	0.0361233	-15.0301	4.66559e-51	2.66427e-49	ENSG00000178038.17_ALS2CL	down	YES
1020.39	-0.770239	0.05135	-14.9998	7.36536e-51	4.18693e-49	ENSG00000175265.18_GOLGA8A	down	YES
1128.14	-0.686468	0.0457862	-14.9929	8.17013e-51	4.62348e-49	ENSG00000205903.7_ZNF316	down	YES
4340.39	0.470923	0.0314258	14.9853	9.16565e-51	5.16359e-49	ENSG00000067560.14_RHOA	up	YES
2401.36	0.669632	0.0448405	14.9336	1.99079e-50	1.11653e-48	ENSG00000118680.14_MYL12B	up	YES
1474.64	0.615904	0.041604	14.804	1.38092e-49	7.71047e-48	ENSG00000136240.10_KDELR2	up	YES
1923.59	-0.563981	0.0381191	-14.7952	1.57201e-49	8.73856e-48	ENSG00000141258.13_SGSM2	down	YES
4013.68	0.445689	0.0301252	14.7946	1.58812e-49	8.78925e-48	ENSG00000114019.15_AMOTL2	up	YES
970.849	-0.731443	0.0494725	-14.7848	1.83507e-49	1.01114e-47	ENSG00000160959.8_LRRC14	down	YES
2448.46	-0.540717	0.03658	-14.7818	1.92104e-49	1.05389e-47	ENSG00000160796.18_NBEAL2	down	YES
596.921	-0.900182	0.060939	-14.7719	2.2247e-49	1.21517e-47	ENSG00000215769.8_ARHGAP27P1-BPTFP1-KPNA2P3	down	YES
130.793	-2.01272	0.136351	-14.7613	2.60212e-49	1.41517e-47	ENSG00000213213.14_CCDC183	down	YES
571.247	0.918526	0.0623087	14.7415	3.48755e-49	1.88854e-47	ENSG00000130962.18_PRRG1	up	YES
3470.6	-0.483922	0.0330576	-14.6388	1.58951e-48	8.57039e-47	ENSG00000100241.21_SBF1	down	YES
2210.68	-0.552929	0.0378077	-14.6248	1.95279e-48	1.04841e-46	ENSG00000253352.10_TUG1	down	YES
1977.58	0.677655	0.0464103	14.6014	2.75222e-48	1.47132e-46	ENSG00000125835.19_SNRPB	up	YES
281.288	-1.30115	0.0892122	-14.5849	3.50246e-48	1.86447e-46	ENSG00000254369.6_HOXA-AS3	down	YES
2022.84	-0.532	0.036544	-14.5578	5.21155e-48	2.76256e-46	ENSG00000132361.18_CLUH	down	YES
2054.59	0.561708	0.0386133	14.547	6.10128e-48	3.2206e-46	ENSG00000102144.15_PGK1	up	YES
1801.22	0.562742	0.0386937	14.5435	6.42407e-48	3.3768e-46	ENSG00000027697.15_IFNGR1	up	YES
1496.74	-0.627577	0.0431896	-14.5307	7.73821e-48	4.05063e-46	ENSG00000122515.15_ZMIZ2	down	YES
3714.35	0.499731	0.0343925	14.5302	7.79585e-48	4.06387e-46	ENSG00000079112.10_CDH17	up	YES
2423.27	0.529025	0.0364543	14.512	1.01707e-47	5.27995e-46	ENSG00000147676.14_MAL2	up	YES
588.81	0.948465	0.0656565	14.4459	2.6619e-47	1.37619e-45	ENSG00000150782.12_IL18	up	YES
7434.78	0.376237	0.0260576	14.4386	2.95635e-47	1.51594e-45	ENSG00000010278.15_CD9	up	YES
6756.06	0.417685	0.0289281	14.4387	2.95264e-47	1.51594e-45	ENSG00000109971.14_HSPA8	up	YES
42389.1	0.410219	0.0284125	14.438	2.98455e-47	1.52418e-45	ENSG00000111057.11_KRT18	up	YES
543.319	0.933318	0.0646819	14.4293	3.3829e-47	1.72062e-45	ENSG00000198843.13_SELENOT	up	YES
1292.27	-0.653618	0.045373	-14.4055	4.78184e-47	2.42235e-45	ENSG00000106123.12_EPHB6	down	YES
1812.44	-0.598085	0.0415198	-14.4048	4.82624e-47	2.43502e-45	ENSG00000140983.14_RHOT2	down	YES
605.218	-0.881966	0.061256	-14.398	5.32445e-47	2.67564e-45	ENSG00000187961.14_KLHL17	down	YES
1117.69	0.703788	0.0489243	14.3853	6.40386e-47	3.20525e-45	ENSG00000014641.21_MDH1	up	YES
4544.15	-0.44474	0.0309409	-14.3739	7.54787e-47	3.76285e-45	ENSG00000103335.22_PIEZO1	down	YES
2231.1	0.547636	0.0381078	14.3707	7.90135e-47	3.9235e-45	ENSG00000067167.8_TRAM1	up	YES
542.252	-0.90186	0.0628099	-14.3586	9.41603e-47	4.65723e-45	ENSG00000161996.19_WDR90	down	YES
61589.8	0.345624	0.0240963	14.3435	1.17072e-46	5.76775e-45	ENSG00000170421.12_KRT8	up	YES
330.267	-1.14377	0.0798173	-14.3298	1.42515e-46	6.9938e-45	ENSG00000287315.1_RP11-245P10.9	down	YES
2951.7	-0.485691	0.0339594	-14.3021	2.12238e-46	1.03749e-44	ENSG00000124193.16_SRSF6	down	YES
367.801	-1.10068	0.0769622	-14.3016	2.13812e-46	1.04113e-44	ENSG00000168743.13_NPNT	down	YES
1020.27	-0.701963	0.0492331	-14.2579	4.00048e-46	1.94047e-44	ENSG00000175455.16_CCDC14	down	YES
234.545	-1.37538	0.0965127	-14.2507	4.43528e-46	2.14309e-44	ENSG00000258498.8_DIO3OS	down	YES
692.684	0.834205	0.0585829	14.2397	5.19344e-46	2.49982e-44	ENSG00000112782.19_CLIC5	up	YES
1265.93	0.651213	0.0457764	14.2259	6.32457e-46	3.03266e-44	ENSG00000155096.15_AZIN1	up	YES
14652	0.392955	0.0276514	14.2111	7.82335e-46	3.73706e-44	ENSG00000124882.4_EREG	up	YES
3955.19	0.480642	0.0338497	14.1993	9.25492e-46	4.40415e-44	ENSG00000171552.14_BCL2L1	up	YES
900.483	-0.713158	0.0502973	-14.1788	1.23879e-45	5.87282e-44	ENSG00000184012.14_TMPRSS2	down	YES
2440.45	-0.514541	0.0363534	-14.1538	1.76852e-45	8.35261e-44	ENSG00000133226.17_SRRM1	down	YES
826.526	-0.74391	0.0526173	-14.1381	2.21064e-45	1.04016e-43	ENSG00000105576.16_TNPO2	down	YES
4488.65	-0.415967	0.029439	-14.1298	2.48863e-45	1.16659e-43	ENSG00000111319.13_SCNN1A	down	YES
536.335	-0.885064	0.0630599	-14.0353	9.48294e-45	4.42878e-43	ENSG00000009950.16_MLXIPL	down	YES
1523.43	-0.582675	0.0415284	-14.0308	1.01045e-44	4.70159e-43	ENSG00000110719.10_TCIRG1	down	YES
9831.73	0.42037	0.0300251	14.0006	1.54527e-44	7.16353e-43	ENSG00000137154.13_RPS6	up	YES
5912.02	0.379368	0.0271474	13.9744	2.2336e-44	1.03164e-42	ENSG00000196230.14_TUBB	up	YES
1587.26	-0.619056	0.0443022	-13.9735	2.26265e-44	1.04123e-42	ENSG00000167548.17_KMT2D	down	YES
1113.6	0.671277	0.0480588	13.9678	2.44952e-44	1.12311e-42	ENSG00000107798.18_LIPA	up	YES
9445.38	0.351797	0.0252221	13.948	3.23713e-44	1.47884e-42	ENSG00000074800.16_ENO1	up	YES
532.928	-1.03307	0.0743058	-13.9029	6.08097e-44	2.76794e-42	ENSG00000205746.9_PKD1P4	down	YES
7426.26	0.359976	0.025896	13.9009	6.2592e-44	2.83878e-42	ENSG00000109321.11_AREG	up	YES
2046.38	-0.5466	0.03936	-13.8872	7.57521e-44	3.42329e-42	ENSG00000101199.13_ARFGAP1	down	YES
953.007	-0.701823	0.0505915	-13.8724	9.31668e-44	4.19518e-42	ENSG00000001617.12_SEMA3F	down	YES
1440.96	0.694121	0.0500671	13.8638	1.04934e-43	4.70816e-42	ENSG00000100632.11_ERH	up	YES
1213.33	-0.620953	0.0448077	-13.8582	1.13499e-43	5.07435e-42	ENSG00000105397.14_TYK2	down	YES
2403.64	0.48275	0.0349022	13.8315	1.64496e-43	7.32826e-42	ENSG00000104408.11_EIF3E	up	YES
419.242	-1.02952	0.0744611	-13.8262	1.77039e-43	7.85914e-42	ENSG00000242294.6_STAG3L5P	down	YES
1417.99	0.595462	0.0431019	13.8152	2.06305e-43	9.12609e-42	ENSG00000164251.5_F2RL1	up	YES
3016.15	0.45949	0.0332896	13.8028	2.45076e-43	1.08031e-41	ENSG00000106367.15_AP1S1	up	YES
256.003	-1.29393	0.0937877	-13.7963	2.68168e-43	1.17797e-41	ENSG00000205890.3_RP11-473M20.5	down	YES
615.282	-0.863561	0.0626077	-13.7932	2.80018e-43	1.22574e-41	ENSG00000044446.12_PHKA2	down	YES
4112.79	0.420462	0.0305856	13.747	5.30539e-43	2.31429e-41	ENSG00000135318.12_NT5E	up	YES
1559.56	-0.608612	0.04431	-13.7353	6.23803e-43	2.71171e-41	ENSG00000134398.15_ERN2	down	YES
943.044	-0.698991	0.0510691	-13.6872	1.21148e-42	5.2482e-41	ENSG00000177084.18_POLE	down	YES
5457.59	0.481945	0.0352238	13.6824	1.29417e-42	5.58717e-41	ENSG00000092199.18_HNRNPC	up	YES
1522.79	0.566085	0.0413804	13.68	1.33631e-42	5.74932e-41	ENSG00000185627.18_PSMD13	up	YES
7023.89	-0.376925	0.027556	-13.6785	1.3649e-42	5.85231e-41	ENSG00000125826.21_RBCK1	down	YES
492.731	-0.902279	0.0659676	-13.6776	1.38153e-42	5.90344e-41	ENSG00000114270.18_COL7A1	down	YES
612.05	-0.869768	0.0637484	-13.6438	2.19896e-42	9.3646e-41	ENSG00000007392.17_LUC7L	down	YES
2072.13	0.510923	0.0374541	13.6413	2.27438e-42	9.65305e-41	ENSG00000005022.6_SLC25A5	up	YES
1371.6	0.620048	0.0454892	13.6307	2.63103e-42	1.11292e-40	ENSG00000106153.13_CHCHD2	up	YES
150.156	-1.66986	0.12262	-13.6181	3.12388e-42	1.31695e-40	ENSG00000279407.1_AC007191.4	down	YES
806.6	0.768097	0.0565796	13.5755	5.59567e-42	2.35112e-40	ENSG00000277791.5_PSMB3	up	YES
2316.79	-0.477347	0.0351989	-13.5614	6.77953e-42	2.83904e-40	ENSG00000131389.18_SLC6A6	down	YES
2364.28	-0.486361	0.0358666	-13.5603	6.88601e-42	2.87405e-40	ENSG00000139613.12_SMARCC2	down	YES
4730.59	-0.497285	0.0367097	-13.5464	8.31969e-42	3.46094e-40	ENSG00000096696.15_DSP	down	YES
1464.49	-0.555145	0.0410491	-13.5239	1.12995e-41	4.685e-40	ENSG00000158545.16_ZC3H18	down	YES
702.372	0.765229	0.0566416	13.51	1.3646e-41	5.63931e-40	ENSG00000057019.16_DCBLD2	up	YES
654.831	-0.794572	0.0588153	-13.5096	1.37237e-41	5.6528e-40	ENSG00000139044.12_B4GALNT3	down	YES
622.299	-0.821849	0.0609411	-13.4859	1.89216e-41	7.76835e-40	ENSG00000149499.12_EML3	down	YES
289.278	-1.15826	0.0861001	-13.4525	2.9772e-41	1.21832e-39	ENSG00000184441.4_AP001062.7	down	YES
988.743	0.697022	0.0518864	13.4336	3.84269e-41	1.56739e-39	ENSG00000182795.13_C1orf116	up	YES
2285.48	-0.569083	0.0424077	-13.4193	4.65903e-41	1.89422e-39	ENSG00000173230.15_GOLGB1	down	YES
2288.63	-0.507174	0.0378412	-13.4027	5.83084e-41	2.36299e-39	ENSG00000172432.19_GTPBP2	down	YES
548.959	0.838278	0.0625484	13.4021	5.879e-41	2.37485e-39	ENSG00000151748.15_SAV1	up	YES
5954.73	0.405668	0.0302761	13.3989	6.13439e-41	2.47008e-39	ENSG00000104904.12_OAZ1	up	YES
1361.48	0.613465	0.0457873	13.3982	6.19868e-41	2.48799e-39	ENSG00000119125.17_GDA	up	YES
1157.65	-0.608239	0.0454436	-13.3845	7.45187e-41	2.98146e-39	ENSG00000160299.17_PCNT	down	YES
6013.94	-0.364482	0.0272526	-13.3742	8.55375e-41	3.41145e-39	ENSG00000129351.17_ILF3	down	YES
4565.6	-0.385129	0.0288224	-13.3621	1.00648e-40	4.0014e-39	ENSG00000143384.14_MCL1	down	YES
837.578	0.731193	0.0548003	13.3429	1.30332e-40	5.16518e-39	ENSG00000143106.13_PSMA5	up	YES
11157.5	-0.413742	0.0310188	-13.3384	1.3833e-40	5.46489e-39	ENSG00000130702.15_LAMA5	down	YES
1684.07	-0.520207	0.0390031	-13.3376	1.3991e-40	5.51e-39	ENSG00000225190.11_PLEKHM1	down	YES
2670.68	0.495468	0.0371692	13.3301	1.54719e-40	6.07418e-39	ENSG00000165678.21_GHITM	up	YES
4696.27	-0.453677	0.0340433	-13.3265	1.62427e-40	6.35693e-39	ENSG00000163527.10_STT3B	down	YES
1419.92	0.561191	0.0421322	13.3197	1.77705e-40	6.93324e-39	ENSG00000084623.12_EIF3I	up	YES
1439.27	-0.590377	0.0444279	-13.2884	2.70163e-40	1.05079e-38	ENSG00000171219.9_CDC42BPG	down	YES
1247.48	-0.614329	0.0462477	-13.2834	2.88795e-40	1.11979e-38	ENSG00000103249.18_CLCN7	down	YES
975.494	-0.652044	0.0491003	-13.2798	3.03097e-40	1.17163e-38	ENSG00000131584.19_ACAP3	down	YES
882.04	-0.675523	0.050888	-13.2747	3.24604e-40	1.25092e-38	ENSG00000275993.3_SIK1B	down	YES
225.753	1.34024	0.100973	13.2734	3.30452e-40	1.26956e-38	ENSG00000165548.11_TMEM63C	up	YES
1047.85	-0.632189	0.0476345	-13.2717	3.38019e-40	1.29468e-38	ENSG00000068745.15_IP6K2	down	YES
941.584	-0.657957	0.0495923	-13.2673	3.58155e-40	1.36763e-38	ENSG00000169926.11_KLF13	down	YES
1523.42	0.646836	0.0488179	13.25	4.51391e-40	1.71843e-38	ENSG00000183291.17_SELENOF	up	YES
1326.87	0.640426	0.0483445	13.2471	4.68864e-40	1.77956e-38	ENSG00000119655.11_NPC2	up	YES
1340.57	-0.592986	0.0447891	-13.2395	5.18964e-40	1.96378e-38	ENSG00000130827.6_PLXNA3	down	YES
442.887	0.91985	0.0695665	13.2226	6.49771e-40	2.45137e-38	ENSG00000123975.5_CKS2	up	YES
329.551	1.06732	0.0807825	13.2123	7.45573e-40	2.80438e-38	ENSG00000127954.13_STEAP4	up	YES
1160.74	-0.59556	0.0450846	-13.2098	7.70001e-40	2.88762e-38	ENSG00000197948.11_FCHSD1	down	YES
1220.7	-0.589615	0.0446392	-13.2085	7.84142e-40	2.9319e-38	ENSG00000146063.20_TRIM41	down	YES
1710.25	-0.530629	0.0402838	-13.1723	1.26719e-39	4.72396e-38	ENSG00000176978.14_DPP7	down	YES
479.192	-0.899534	0.068322	-13.1661	1.37516e-39	5.1113e-38	ENSG00000232434.2_AJM1	down	YES
2738.42	-0.484584	0.0368322	-13.1565	1.56112e-39	5.78535e-38	ENSG00000105401.9_CDC37	down	YES
327.337	-1.05029	0.0798588	-13.1519	1.6604e-39	6.13518e-38	ENSG00000167766.19_ZNF83	down	YES
2464.28	0.455018	0.0346268	13.1406	1.92642e-39	7.09724e-38	ENSG00000065911.13_MTHFD2	up	YES
364.691	-0.987801	0.0752666	-13.124	2.39815e-39	8.80933e-38	ENSG00000158106.14_RHPN1	down	YES
1452.61	0.559023	0.0427193	13.086	3.96128e-39	1.45089e-37	ENSG00000221926.13_TRIM16	up	YES
4022.24	0.388434	0.0297527	13.0554	5.91828e-39	2.16138e-37	ENSG00000128595.17_CALU	up	YES
290.59	1.18585	0.0909205	13.0427	6.9953e-39	2.5473e-37	ENSG00000167165.19_UGT1A6	up	YES
3794.24	0.536649	0.0411486	13.0417	7.08269e-39	2.57167e-37	ENSG00000083845.9_RPS5	up	YES
279.946	-1.12062	0.0860834	-13.0178	9.6935e-39	3.50949e-37	ENSG00000215375.6_MYL5	down	YES
4266.73	-0.393429	0.0303006	-12.9842	1.50422e-38	5.43033e-37	ENSG00000204256.14_BRD2	down	YES
242.697	1.28715	0.0993002	12.9622	2.00389e-38	7.21345e-37	ENSG00000214049.8_UCA1	up	YES
9498.2	-0.348055	0.026876	-12.9504	2.33768e-38	8.39093e-37	ENSG00000115053.17_NCL	down	YES
476.372	-0.879399	0.0679313	-12.9454	2.49396e-38	8.92639e-37	ENSG00000184208.12_C22orf46	down	YES
2733.03	-0.441564	0.0341229	-12.9404	2.66238e-38	9.50214e-37	ENSG00000105429.13_MEGF8	down	YES
658.359	-0.771569	0.0597693	-12.9091	3.99869e-38	1.4231e-36	ENSG00000213599.10_SLX1A-SULT1A3	down	YES
736.853	0.718544	0.0556761	12.9058	4.17555e-38	1.48185e-36	ENSG00000168288.13_MMADHC	up	YES
595.036	-0.78766	0.0610522	-12.9014	4.41808e-38	1.5635e-36	ENSG00000269335.6_IKBKG	down	YES
646.549	-0.779374	0.0604235	-12.8985	4.58799e-38	1.61907e-36	ENSG00000121716.20_PILRB	down	YES
1677.01	0.50912	0.0395206	12.8824	5.65458e-38	1.98987e-36	ENSG00000129083.13_COPB1	up	YES
1829.27	0.511376	0.0397012	12.8806	5.78815e-38	2.03119e-36	ENSG00000101182.15_PSMA7	up	YES
1037.94	-0.626445	0.0486646	-12.8727	6.4129e-38	2.24416e-36	ENSG00000168056.17_LTBP3	down	YES
260.423	1.16729	0.0908105	12.8541	8.15785e-38	2.84686e-36	ENSG00000204983.14_PRSS1	up	YES
1070.17	-0.628713	0.0490015	-12.8305	1.10679e-37	3.85168e-36	ENSG00000012822.16_CALCOCO1	down	YES
851.013	-0.660693	0.0515031	-12.8282	1.13959e-37	3.95489e-36	ENSG00000161395.14_PGAP3	down	YES
786.104	-0.700645	0.0546299	-12.8253	1.18314e-37	4.09471e-36	ENSG00000227827.3_PKD1P2	down	YES
4279.52	0.424699	0.033151	12.8111	1.42164e-37	4.90661e-36	ENSG00000123416.15_TUBA1B	up	YES
219.59	-1.3326	0.104056	-12.8066	1.50595e-37	5.18337e-36	ENSG00000278224.7_PRICKLE4	down	YES
1814.01	0.510727	0.0399245	12.7923	1.80975e-37	6.21198e-36	ENSG00000120742.11_SERP1	up	YES
2296.32	0.46644	0.0364826	12.7853	1.98155e-37	6.78316e-36	ENSG00000185787.15_MORF4L1	up	YES
251.999	-1.17319	0.0917703	-12.784	2.01376e-37	6.87469e-36	ENSG00000106006.6_HOXA6	down	YES
889.775	0.665283	0.0521608	12.7545	2.94435e-37	1.00244e-35	ENSG00000059804.16_SLC2A3	up	YES
959.906	-0.728052	0.0571146	-12.7472	3.23095e-37	1.09704e-35	ENSG00000179832.18_MROH1	down	YES
5391.69	0.369804	0.0290214	12.7424	3.43525e-37	1.16326e-35	ENSG00000167460.17_TPM4	up	YES
1277	-0.555634	0.0436434	-12.7312	3.96662e-37	1.33959e-35	ENSG00000126456.16_IRF3	down	YES
294.374	-1.10524	0.0868551	-12.7252	4.28642e-37	1.44371e-35	ENSG00000241489.8_AF011889.5	down	YES
705.47	-0.711817	0.0560112	-12.7085	5.30527e-37	1.78209e-35	ENSG00000214176.9_PLEKHM1P1	down	YES
3565.1	0.394658	0.0310593	12.7066	5.43373e-37	1.82037e-35	ENSG00000196419.13_XRCC6	up	YES
184.61	-1.36174	0.107277	-12.6937	6.40618e-37	2.14045e-35	ENSG00000224420.3_ADM5	down	YES
1690.35	0.533842	0.0421706	12.6591	9.96262e-37	3.31991e-35	ENSG00000138413.14_IDH1	up	YES
2176.27	-0.490335	0.0387496	-12.654	1.06383e-36	3.53569e-35	ENSG00000188895.12_MSL1	down	YES
2840.04	0.425899	0.0337181	12.6312	1.42159e-36	4.71225e-35	ENSG00000163682.17_RPL9	up	YES
302.11	-1.04705	0.0829219	-12.6269	1.50111e-36	4.96274e-35	ENSG00000063438.20_AHRR	down	YES
1887.3	0.483579	0.0384256	12.5848	2.55959e-36	8.43994e-35	ENSG00000156261.13_CCT8	up	YES
2557.55	0.583239	0.0464255	12.5629	3.37703e-36	1.11062e-34	ENSG00000101608.13_MYL12A	up	YES
1089.34	0.584611	0.0465694	12.5535	3.80113e-36	1.24683e-34	ENSG00000102471.14_NDFIP2	up	YES
1361.88	-0.607606	0.0484278	-12.5466	4.14726e-36	1.35682e-34	ENSG00000128731.18_HERC2	down	YES
792.547	-0.665129	0.053042	-12.5397	4.52952e-36	1.47804e-34	ENSG00000173227.14_SYT12	down	YES
6130.89	-0.353444	0.0281904	-12.5378	4.63874e-36	1.50975e-34	ENSG00000090863.12_GLG1	down	YES
854.609	0.642159	0.0513058	12.5163	6.08021e-36	1.97379e-34	ENSG00000213782.7_DDX47	up	YES
2371.49	-0.456855	0.0365503	-12.4993	7.52644e-36	2.43698e-34	ENSG00000196642.19_RABL6	down	YES
17017.7	0.290894	0.0232854	12.4926	8.19589e-36	2.64692e-34	ENSG00000067225.19_PKM	up	YES
2665.5	-0.449536	0.0360216	-12.4796	9.64554e-36	3.1071e-34	ENSG00000107404.20_DVL1	down	YES
744.617	0.697461	0.0559515	12.4654	1.1522e-35	3.70206e-34	ENSG00000160183.17_TMPRSS3	up	YES
2515.29	-0.48099	0.0386122	-12.4569	1.2819e-35	4.10828e-34	ENSG00000096433.11_ITPR3	down	YES
946.615	-0.614404	0.0493304	-12.4549	1.31574e-35	4.20602e-34	ENSG00000168395.16_ING5	down	YES
2081.35	0.468588	0.0376286	12.453	1.34719e-35	4.29562e-34	ENSG00000110958.16_PTGES3	up	YES
292.037	1.07106	0.0861438	12.4333	1.72284e-35	5.4795e-34	ENSG00000105048.17_TNNT1	up	YES
882.206	-0.679841	0.0547243	-12.423	1.96035e-35	6.21916e-34	ENSG00000136802.12_LRRC8A	down	YES
498.065	0.843152	0.0678834	12.4206	2.02095e-35	6.39526e-34	ENSG00000148834.13_GSTO1	up	YES
334.496	-0.983928	0.0792675	-12.4128	2.22855e-35	7.03448e-34	ENSG00000124593.16_RP11-298J23.10	down	YES
1020.59	0.60384	0.0486885	12.4021	2.54521e-35	8.0139e-34	ENSG00000179750.16_APOBEC3B	up	YES
1404.55	0.56583	0.045646	12.3961	2.74512e-35	8.62175e-34	ENSG00000137876.11_RSL24D1	up	YES
482.305	0.830854	0.0671618	12.3709	3.75447e-35	1.17624e-33	ENSG00000136521.13_NDUFB5	up	YES
2395.41	-0.454355	0.0367486	-12.3639	4.09811e-35	1.28071e-33	ENSG00000166888.12_STAT6	down	YES
1159.85	-0.557037	0.0450561	-12.3632	4.13424e-35	1.2888e-33	ENSG00000225151.10_GOLGA2P7	down	YES
358.077	-0.95808	0.077525	-12.3583	4.39138e-35	1.36557e-33	ENSG00000273151.1_RP11-449P15.2	down	YES
782.051	-0.694242	0.0562008	-12.3529	4.69939e-35	1.45774e-33	ENSG00000090006.18_LTBP4	down	YES
357.116	-1.06061	0.0858725	-12.351	4.81296e-35	1.48929e-33	ENSG00000198040.11_ZNF84	down	YES
609.253	0.77208	0.0627696	12.3002	9.03312e-35	2.78828e-33	ENSG00000163618.18_CADPS	up	YES
658.209	-0.714767	0.0581125	-12.2997	9.08868e-35	2.79856e-33	ENSG00000213339.9_QTRT1	down	YES
100.184	1.91983	0.156091	12.2994	9.11989e-35	2.8013e-33	ENSG00000196754.13_S100A2	up	YES
1270.23	0.549499	0.0447012	12.2927	9.91307e-35	3.03751e-33	ENSG00000124767.7_GLO1	up	YES
449.84	-0.850603	0.0692113	-12.2899	1.02578e-34	3.13549e-33	ENSG00000100968.14_NFATC4	down	YES
710.078	-0.714391	0.0583889	-12.235	2.02025e-34	6.16029e-33	ENSG00000158805.12_ZNF276	down	YES
219.158	1.30225	0.106611	12.215	2.58542e-34	7.86457e-33	ENSG00000187837.4_H1-2	up	YES
7650.16	0.355017	0.0290776	12.2093	2.77236e-34	8.41283e-33	ENSG00000198034.11_RPS4X	up	YES
6889.21	0.332928	0.0272831	12.2027	3.00646e-34	9.10125e-33	ENSG00000204525.17_HLA-C	up	YES
17159.3	-0.48699	0.0400307	-12.1654	4.7513e-34	1.43487e-32	ENSG00000124942.14_AHNAK	down	YES
922.067	-0.674771	0.0555336	-12.1507	5.68979e-34	1.71417e-32	ENSG00000176444.19_CLK2	down	YES
308.097	1.03647	0.0853402	12.1452	6.08345e-34	1.82838e-32	ENSG00000240065.8_PSMB9	up	YES
4336.07	0.362009	0.0298196	12.14	6.48551e-34	1.94457e-32	ENSG00000145741.16_BTF3	up	YES
1339.18	-0.525143	0.0432795	-12.1337	6.99821e-34	2.0933e-32	ENSG00000109118.14_PHF12	down	YES
689.673	-0.68859	0.0567601	-12.1316	7.18508e-34	2.14409e-32	ENSG00000215440.12_NPEPL1	down	YES
3172.05	0.399141	0.0329024	12.1311	7.23062e-34	2.15257e-32	ENSG00000132341.12_RAN	up	YES
863.987	0.628149	0.0517872	12.1294	7.37724e-34	2.19102e-32	ENSG00000189159.16_JPT1	up	YES
359.51	-0.919663	0.0759189	-12.1138	8.93095e-34	2.64622e-32	ENSG00000213906.10_LTB4R2	down	YES
2129.2	0.442683	0.0365812	12.1014	1.03873e-33	3.0705e-32	ENSG00000123562.18_MORF4L2	up	YES
850.539	-0.62825	0.051999	-12.082	1.31558e-33	3.87972e-32	ENSG00000139718.11_SETD1B	down	YES
2550.7	0.471034	0.0390129	12.0738	1.45253e-33	4.27357e-32	ENSG00000128791.12_TWSG1	up	YES
523.301	-0.789628	0.0654219	-12.0698	1.52547e-33	4.47768e-32	ENSG00000107957.16_SH3PXD2A	down	YES
970.122	0.710281	0.0588568	12.068	1.55962e-33	4.56726e-32	ENSG00000174851.16_YIF1A	up	YES
2109.41	0.438366	0.0363529	12.0586	1.7467e-33	5.1032e-32	ENSG00000131238.18_PPT1	up	YES
1540.64	-0.521342	0.0432719	-12.048	1.98644e-33	5.79017e-32	ENSG00000198517.10_MAFK	down	YES
2269.64	0.425422	0.0353661	12.0291	2.49897e-33	7.26727e-32	ENSG00000138166.6_DUSP5	up	YES
235.648	-1.19067	0.0990415	-12.0219	2.72608e-33	7.9094e-32	ENSG00000282458.1_WASH5P	down	YES
431.611	0.856527	0.0712784	12.0166	2.90542e-33	8.41032e-32	ENSG00000106066.15_CPVL	up	YES
4151.82	0.359446	0.0299263	12.011	3.10915e-33	8.97937e-32	ENSG00000110955.9_ATP5F1B	up	YES
564.522	-0.738075	0.0614837	-12.0044	3.36907e-33	9.70772e-32	ENSG00000171163.16_ZNF692	down	YES
1040.74	0.594968	0.0495654	12.0037	3.39757e-33	9.76744e-32	ENSG00000088832.18_FKBP1A	up	YES
1214.34	0.618287	0.0515916	11.9842	4.29756e-33	1.23265e-31	ENSG00000143612.21_C1orf43	up	YES
22041.5	-0.293458	0.0245399	-11.9584	5.86738e-33	1.67909e-31	ENSG00000178209.16_PLEC	down	YES
575.63	0.813123	0.0680935	11.9413	7.21072e-33	2.05883e-31	ENSG00000119900.9_OGFRL1	up	YES
831.143	-0.619441	0.0519882	-11.915	9.88322e-33	2.81548e-31	ENSG00000163013.12_FBXO41	down	YES
1357.54	-0.529972	0.0445169	-11.905	1.11527e-32	3.16995e-31	ENSG00000272333.7_KMT2B	down	YES
7690.97	0.350456	0.0294822	11.8871	1.38184e-32	3.91876e-31	ENSG00000122406.14_RPL5	up	YES
19054.1	0.30916	0.0260153	11.8838	1.43716e-32	4.06644e-31	ENSG00000167642.13_SPINT2	up	YES
395.387	-0.874452	0.0736666	-11.8704	1.68679e-32	4.76205e-31	ENSG00000184465.16_WDR27	down	YES
736.566	-0.665131	0.0560608	-11.8645	1.81066e-32	5.10031e-31	ENSG00000100429.18_HDAC10	down	YES
416.563	0.841575	0.0709714	11.8579	1.95723e-32	5.50081e-31	ENSG00000168283.14_BMI1	up	YES
359.81	-0.8935	0.0754473	-11.8427	2.3476e-32	6.58323e-31	ENSG00000177943.14_MAMDC4	down	YES
2090.28	0.436144	0.0368585	11.8329	2.63754e-32	7.37983e-31	ENSG00000137575.12_SDCBP	up	YES
1323.22	0.50986	0.043145	11.8174	3.17464e-32	8.86288e-31	ENSG00000197930.13_ERO1A	up	YES
2575.77	0.410314	0.0347219	11.8171	3.18362e-32	8.86824e-31	ENSG00000150753.12_CCT5	up	YES
746.746	-0.636612	0.05392	-11.8066	3.60914e-32	1.00313e-30	ENSG00000100726.15_TELO2	down	YES
1687.15	0.467637	0.0396218	11.8025	3.78813e-32	1.05056e-30	ENSG00000134308.14_YWHAQ	up	YES
27677.1	-0.300717	0.0255163	-11.7853	4.64986e-32	1.2867e-30	ENSG00000188157.15_AGRN	down	YES
377.569	0.905434	0.0768303	11.7849	4.67181e-32	1.28993e-30	ENSG00000111711.10_GOLT1B	up	YES
3255.52	-0.389534	0.0330925	-11.7711	5.5019e-32	1.5158e-30	ENSG00000137497.18_NUMA1	down	YES
409.825	-0.901213	0.0765871	-11.7672	5.76288e-32	1.58423e-30	ENSG00000142765.18_SYTL1	down	YES
2788.33	-0.40911	0.0347867	-11.7605	6.23613e-32	1.71058e-30	ENSG00000141959.17_PFKL	down	YES
919.081	-0.589449	0.0501946	-11.7433	7.648e-32	2.09329e-30	ENSG00000160957.14_RECQL4	down	YES
136.55	1.52071	0.129534	11.7398	7.96284e-32	2.17472e-30	ENSG00000196139.14_AKR1C3	up	YES
1093.12	-0.542864	0.046273	-11.7318	8.76041e-32	2.38735e-30	ENSG00000276168.1_RN7SL1	down	YES
282.282	1.0483	0.0893622	11.7309	8.85371e-32	2.40756e-30	ENSG00000078018.21_MAP2	up	YES
1718.27	-0.455775	0.0389003	-11.7165	1.0495e-31	2.8477e-30	ENSG00000071894.17_CPSF1	down	YES
836.452	0.697662	0.0595743	11.7108	1.12239e-31	3.03893e-30	ENSG00000132963.8_POMP	up	YES
495.469	-0.764526	0.0652982	-11.7082	1.15674e-31	3.12519e-30	ENSG00000132635.17_PCED1A	down	YES
1013.5	0.600611	0.0512992	11.708	1.16002e-31	3.12734e-30	ENSG00000013275.8_PSMC4	up	YES
460.055	-0.798636	0.0682239	-11.7061	1.18616e-31	3.19096e-30	ENSG00000223705.9_NSUN5P1	down	YES
407.493	-0.890566	0.0761064	-11.7016	1.25095e-31	3.35805e-30	ENSG00000103253.19_HAGHL	down	YES
739.615	-0.644273	0.0550663	-11.7	1.27516e-31	3.41575e-30	ENSG00000258366.10_RTEL1	down	YES
3125.45	-0.495457	0.0423705	-11.6935	1.37676e-31	3.68004e-30	ENSG00000148773.14_MKI67	down	YES
1925.94	0.437575	0.037452	11.6836	1.5456e-31	4.12258e-30	ENSG00000057608.17_GDI2	up	YES
1077.38	-0.574665	0.0491967	-11.681	1.59471e-31	4.24456e-30	ENSG00000107816.17_LZTS2	down	YES
1045.9	0.550224	0.0471086	11.6799	1.61479e-31	4.28891e-30	ENSG00000141753.7_IGFBP4	up	YES
26694	0.2584	0.0221365	11.673	1.75053e-31	4.63964e-30	ENSG00000167996.16_FTH1	up	YES
174.292	-1.29769	0.111181	-11.6718	1.77552e-31	4.69598e-30	ENSG00000272141.1_RP11-465B22.8	down	YES
921.647	0.598912	0.0514241	11.6465	2.39e-31	6.30789e-30	ENSG00000127884.5_ECHS1	up	YES
4350.43	-0.374077	0.032151	-11.635	2.73574e-31	7.20526e-30	ENSG00000012171.20_SEMA3B	down	YES
1004.59	-0.568145	0.0488604	-11.6279	2.97264e-31	7.81281e-30	ENSG00000130762.15_ARHGEF16	down	YES
2520.28	-0.528193	0.0454831	-11.6129	3.54205e-31	9.28993e-30	ENSG00000137642.13_SORL1	down	YES
1302.89	-0.514964	0.0443705	-11.606	3.84194e-31	1.00555e-29	ENSG00000099949.21_LZTR1	down	YES
674.717	-0.666189	0.0574109	-11.6039	3.93837e-31	1.02651e-29	ENSG00000105523.4_FAM83E	down	YES
3999.45	0.363406	0.0313172	11.604	3.93039e-31	1.02651e-29	ENSG00000139289.14_PHLDA1	up	YES
470.159	-0.846511	0.0730105	-11.5944	4.40072e-31	1.14464e-29	ENSG00000197182.14_MIRLET7BHG	down	YES
498.054	-0.754278	0.0650574	-11.594	4.41745e-31	1.14662e-29	ENSG00000196296.14_ATP2A1	down	YES
706.595	0.663084	0.0572131	11.5897	4.64678e-31	1.20366e-29	ENSG00000085719.13_CPNE3	up	YES
1759.75	-0.446303	0.0385306	-11.5831	5.02011e-31	1.29731e-29	ENSG00000108312.15_UBTF	down	YES
720.527	-0.635403	0.0548568	-11.5829	5.02898e-31	1.29731e-29	ENSG00000178623.12_GPR35	down	YES
1078.93	-0.565552	0.0488398	-11.5797	5.22167e-31	1.34426e-29	ENSG00000127586.17_CHTF18	down	YES
1292.93	0.511937	0.0442166	11.5779	5.33114e-31	1.36964e-29	ENSG00000116489.13_CAPZA1	up	YES
4370.78	-0.365954	0.0316543	-11.561	6.49856e-31	1.66615e-29	ENSG00000171223.6_JUNB	down	YES
2235.87	-0.437282	0.0378336	-11.558	6.72251e-31	1.72006e-29	ENSG00000164078.13_MST1R	down	YES
756.561	0.629254	0.0544662	11.5531	7.11923e-31	1.81786e-29	ENSG00000111843.14_TMEM14C	up	YES
468.325	0.779718	0.0675495	11.5429	8.01521e-31	2.03958e-29	ENSG00000198898.14_CAPZA2	up	YES
1370.77	0.504352	0.0436938	11.5429	8.02001e-31	2.03958e-29	ENSG00000265808.4_SEC22B	up	YES
1749.76	0.473428	0.0411241	11.5122	1.14543e-30	2.90707e-29	ENSG00000131507.11_NDFIP1	up	YES
837.073	0.607931	0.0528154	11.5105	1.16834e-30	2.95926e-29	ENSG00000171431.4_KRT20	up	YES
1720.88	0.450625	0.0391507	11.51	1.17467e-30	2.96929e-29	ENSG00000112972.15_HMGCS1	up	YES
641.879	-0.697533	0.0606435	-11.5022	1.28628e-30	3.24488e-29	ENSG00000006025.12_OSBPL7	down	YES
3222.35	0.419776	0.0364999	11.5007	1.30794e-30	3.29292e-29	ENSG00000117450.15_PRDX1	up	YES
357.185	-0.8968	0.0780012	-11.4973	1.36157e-30	3.42108e-29	ENSG00000287156.1_RP11-242G5.1	down	YES
1138.33	-0.536318	0.0466608	-11.494	1.41422e-30	3.54627e-29	ENSG00000115457.10_IGFBP2	down	YES
3390.94	0.374948	0.0326245	11.4928	1.43315e-30	3.58658e-29	ENSG00000075415.15_SLC25A3	up	YES
699.291	-0.679551	0.0592322	-11.4727	1.81023e-30	4.52125e-29	ENSG00000164877.19_MICALL2	down	YES
2502.2	0.399693	0.0348482	11.4695	1.87656e-30	4.67762e-29	ENSG00000109332.20_UBE2D3	up	YES
1475.99	-0.497863	0.0434351	-11.4622	2.04209e-30	5.08016e-29	ENSG00000169718.18_DUS1L	down	YES
5363.21	0.338476	0.0295362	11.4597	2.10208e-30	5.21906e-29	ENSG00000082781.12_ITGB5	up	YES
6172.13	-0.408103	0.0356401	-11.4507	2.33355e-30	5.78233e-29	ENSG00000132182.12_NUP210	down	YES
301.288	-0.965469	0.0843715	-11.4431	2.54682e-30	6.29837e-29	ENSG00000135722.9_FBXL8	down	YES
1678.25	0.465829	0.0407327	11.4362	2.75562e-30	6.80134e-29	ENSG00000168528.12_SERINC2	up	YES
813.436	0.604192	0.0528368	11.4351	2.79375e-30	6.88193e-29	ENSG00000134531.10_EMP1	up	YES
533.973	-0.750535	0.0657182	-11.4205	3.30336e-30	8.12135e-29	ENSG00000166436.17_TRIM66	down	YES
8894.58	-0.289163	0.0253469	-11.4082	3.80603e-30	9.3389e-29	ENSG00000133030.22_MPRIP	down	YES
760.509	0.651885	0.0571449	11.4076	3.83275e-30	9.38614e-29	ENSG00000241837.7_ATP5PO	up	YES
334.66	0.912383	0.0800313	11.4003	4.16559e-30	1.01814e-28	ENSG00000253276.4_CCDC71L	up	YES
2648.78	-0.392011	0.0344134	-11.3912	4.62358e-30	1.12788e-28	ENSG00000112655.16_PTK7	down	YES
[truncated: 12,048 more rows]
