# Supplementary material
Source: Research Square preprint supplement (doi:10.21203/rs.3.rs-9763213/v1)
Supplement: Supplementary file 4 [file 7993a2e778f273eca2981f1a.docx]

**Supplementary Information**

**Additional File 1 – Table S1 – Phenotypic data from the local cohort and the TCGA-COAD cohort.**

**Additional File 2 - Figure S1 – Normalization procedure and sampling heterogeneity in the context of tumor samples**

**Additional File 3 – Table S2 – Primer sequences for the generation of gRNA constructs**

**Additional File 4 – Table S3 – Normalized Peptide / PTM ratio of the tumor, normal and cell line samples subjected to epiprofile analysis.**

**Additional File 5 – Table S4 – Statistical significance of epiprofile results in the contrasts tumor vs control or peritumor vs control in the context of Peptides or PTMs.**

**Additional File 6- Figure S2 – The epigenetic modification landscape of peptide H3_9_17 in the local COAD cohort.**

**Additional File 7 – Table S5 – Normalized count data for the RNAseq samples from the local cohort**

**Additional File 8 – Table S6 – Normalized count data for the RNAseq samples from the TCGA-COAD cohort**

**Additional File 9 - Figure S3 – Identification of transcriptional alterations between paired control and tumor samples from the TCGA cohort**

**Additional File 10 – Table S7 – Statistical significance of RNAseq results in the contrasts tumor vs control (paired samples) in the context of Local and TCGA COAD cohorts.**

**Additional File 11 – Table S8 – Pairwise correlation analysis between Gene expression and H3K14ac or H3K9me2 levels in the local COAD cohort.**

**Additional File 12 – Table S9 – Normalized Peptide / HPTM ratio of the DLD1 and SW1116 cell lines subjected to pharmacological modulation and subsequent epiprofile analysis.**

**Additional File 13 - Figure S4 –** **Global epigenetic landscape of H3_9_17 peptide modifications in SW1116 and DLD1 cell lines following pharmacological inhibition or genetic ablation of EHMT2 or HDAC7 genes.**

**Additional File 14 - Figure S5 – Cell viability and histone post-translational modification profiling following genetic ablation of EHMT2 or HDAC7 in SW1116 and DLD1 cell lines.**

**Additional File 15 – Table S10 – Normalized Peptide / HPTM ratio of the DLD1 and SW1116 cell lines subjected to genetic ablation of EHMT2 or HDAC7 and subsequent epiprofile analysis.**

**Additional File 16 – Table S11 – Normalized count data for the RNAseq samples from SW1116 or DLD1 cells subjected to genetic ablation of EHMT2 and statistical significance of RNAseq results per cell line.**

**Additional File 17 - Figure S7 – Gene ontologies associated with EHMT2 KO in colon cancer cell lines and patient samples.**

**Additional File 18 – Table S12 – Genomic location of differential H3K9me2 and H3K14ac peaks in EHMT2 KO vs control cells using epic2 algorithm.**

**Additional File 19 – Table S13 – Genomic location of differential H3K9me2 and H3K14ac peaks in EHMT2 KO vs control cells using HMMtBroadPeak algorithm.**

**Additional File 20 - Figure S7 – Correlation between H3K14ac and H3K9me2 levels in colon cancer cell lines in the context of differentially regulated peaks upon EHMT2 KO.**

**Additional File 21 - Figure S8 – Performance of elastic net, gradient boosting, linear models, and random forest in predicting H3K14ac / H3K9me2 ratio in the local cohort.**

**Additional File 22 - Figure S9 – Gene ontologies enriched in the H3K14ac / H3K9me2 signature and survival analysis of EHMT2 or HDAC7 levels in colon adenocarcinoma.**

**Additional File 23 – Table S14 – Survival data and estimated H3K14ac / H3K9me2 ratio from the TCGA-COAD cohort.**

**Additional File 24 - Figure S10 – Association of H3K14ac / H3K9me2 ratio with tumor ecotypes.**

***Supplementary Figure 1 – Normalization procedure and sampling heterogeneity in the context of tumor samples. A)*** *Boxplots**depicting the**global signal intensities detected in the proteomic experiment, including all peptides identified with EpiProfile 2.1. The left plot represents the data prior scaled normalization, whereas the right panel shows**the scaled data resulting from the normalization steps.* ***B)*** *Scatter plots illustrating pairwise correlations between HPTMs identified from different sampling sites within the same tumor samples from the local cohort. The robust correlation coefficient and its corresponding statistical significance are included for each of the indicated comparisons.*

***Supplementary Figure 2 – The epigenetic modification landscape of peptide H3_9_17 in the local COAD cohort. A)*** *Boxplots showing the relative abundance ratios of the indicated histone post-translational modifications identified between residues 9 and 17 of histone H3 (peptide H3_9_17). Statistical significance, obtained by means of limma analysis between paired peritumor or tumor samples versus matched controls, is indicated. Statistical significance for cell lines versus controls was calculated using a two-tailed Welch’s T-Test (* = p < 0.05; ** = p < 0.01; *** = p < 0.001; ns = non-significant).*

***Supplementary Figure 3 – Identification of transcriptional alterations between paired control and tumor samples from the TCGA cohort. A)*** *PCA performed using the 1,000 most variable genes expressed in a cohort of 22 paired control-tumor samples from the TCGA COAD dataset. The percentage of variance explained by the first two dimensions is indicated in the corresponding axes.* ***B)*** *Scatterplot indicating the number of up- or downregulated genes identified between paired control and tumor samples from the TCGA cohort. The total number of significant up- and downregulated genes is indicated (p.adj < 0.001).* ***C)****Heatmap illustrating hierarchical clustering of samples based on DEGs identified in the TCGA-COAD dataset. The color scale represents the relative expression of the genes displayed. Additional clinical information of the samples is indicated in the legend.* ***D)*** *UpSetR plot showing the total number of DEGs (left) and their potential overlaps (main plot) between control and tumor samples from the local (Figure 2B) or the TCGA COAD cohorts.* ***E)*** *Scatterplot illustrating the robust correlation between Log2 fold changes of all the genes included in the paired control vs tumor comparisons in the context of the local cohort (x-axis) and the TCGA COAD cohort (y-axis). In red, DEGs identified with statistical significance in both cohorts.* ***F)*** *Boxplots showing EHMT2 and HDAC7 expression levels in the local cohort (top) and TCGA COAD cohort (bottom). Statistical significance, calculated by means of the limma analysis, is included (** = p < 0.01; *** = p < 0.001).*

***Supplementary Figure 4 –Global epigenetic landscape of H3_9_17 peptide modifications in SW1116 and DLD1 cell lines following pharmacological inhibitions or genetic ablation of EHMT2 or HDAC7 genes. A)*** *Barplots showing the relative abundance ratio obtained from the proteomic analysis of the indicated histone posttranslational modifications observed in the peptide H3_9_17 in SW1116 and DLD1 cell lines treated with increasing doses of Apicidin for 72h.* ***B)*** *Same as A, but for cells treated with UNC0642.* ***C)*** *Bar plots showing relative abundance ratios of H3_9_17 peptide modifications in SW1116 and DLD1 cells following CRISPR/Cas9-mediated EHMT2 knockout.* ***D)*** *Same as* ***C****, but for HDAC7 knockout. For C and D, control conditions include a non-targeting gRNA, while the vehicle- treatment samples for pharmacological experiments received 10 µM DMSO (A and B) Statistical significance between conditions, calculated from biological duplicates using Welch’s t-test, is indicated.*

***Supplementary Figure 5 – Cell viability and histone post-translational modification profiling following genetic ablation of EHMT2 or HDAC7 in SW1116 and DLD1 cell lines. A)*** *Western blots showing EHMT2 and HDAC7 protein levels in SW1116 (top) and DLD1 (bottom) cells under control or sgRNA-treated conditions.* ***B)*** *Line plots illustrating cell viability of SW1116 (Top) and DLD1 cells (Bottom) following CRISPR/Cas9-mediated EHMT2 (left) or HDAC7 (right) knockout. The viability of these stable cells was monitored for 72h. Statistical significance of the latest timepoint was calculated by means of the Welch’s t-test (*** = p < 0.001).* ***C)*** *Heatmaps showing relative abundance ratio of the indicated peptide modifications included in the peptide H3_9_17 under the conditions described above.* ***D)*** *Barplot depicting relative ratio of the peptides H3_9_17 K9me2 and H3_9_17 K14ac in the abovementioned experiments. Statistical significance between conditions in biological duplicates was calculated by means of a Welch’s t-test.*

***Supplementary Figure 6 – Gene ontologies associated with EHMT2 KO in colon cancer cell lines and patient samples. A)*** *Diagram illustrating the hierarchical relationship of significant gene ontologies identified in the context of genes upregulated in colon cancer and downregulated upon EHMT2 knockout in SW1116 and DLD1 cell lines. The color scale indicates the statistical significance of each pathway category.* ***B)*** *Same as A, but for genes downregulated in colon cancer and upregulated upon EHMT2 knockout in SW1116 and DLD1 cell lines.* ***C)*** *Treemap depicting the hierarchical clustering and the proportions of the abovementioned pathways.*

***Supplementary Figure 7 – Correlation between H3K14ac and H3K9me2 levels in colon cancer cell lines in the context of differentially regulated peaks upon EHMT2 KO. A)*** *Density plots showing genome-wide, pairwise relationships between H3K9me2-H3K14ac signals in SW1116 cells at H3K9me2 peaks (left) or H3K14ac peaks (right). For proper comparisons, a set including a similar number of randomly selected peaks is included. Peaks obtained using EPIC or HMMtBroadPeak algorithms are indicated.* ***B)*** *Same as A, but for DLD1 cells. Axes represent log2 fold change values of the CUT&RUN signal per genomic bin between EHMT2 KO and control conditions.*

***Supplementary Figure 8 – Performance of elastic net, gradient boosting, linear models, and random forest in predicting H3K14ac / H3K9me2 ratio in the local cohort. A)*** *Barplot showing the metrics obtained for the different algorithms in training and predicting the H3K14ac / H3K9me2 ratio in samples from the local cohort. Left panel indicates the Root Mean Square Error (RMSE), middle panel reflects the Coefficient of determination (R2) and right panel illustrates the Mean Absolute Error (MAE) of the different algorithms tested in this dataset.*

***Supplementary Figure 9 – Gene ontologies enriched in the H3K14ac / H3K9me2 signature and survival analysis of EHMT2 or HDAC7 levels in colon adenocarcinoma. A)*** *Scatterplot illustrating the GSEA NES in gene ontologies (C5) of the patient’s data associated to the H3K14ac / H3K9me2 ratio (treated as continuous variable) in the local cohort (x-axis) and TCGA cohort (y-axis). Colored dots indicate significance of the gene sets in both cohorts (red), local only (blue), or TCGA only (yellow) (p.val < 0.05).* ***B)*** *Barplot showing NES scores of significantly enriched pathways (MSigDB C5 – gene ontologies).* ***C)*** *Kaplan-Meier curves showing overall survival of patients with low or high EHMT2 (top) or HDAC7 (bottom) expressions in TCGA COAD cohort. Left: all patients; middle: radiotherapy-treated; right: non-irradiated. P-value refers to differences in event rates between Kaplan-Meier curves and was calculated with the log-rank test.*

***Supplementary Figure 10 – Association of H3K14ac / H3K9me2 ratio with tumor ecotypes. A)*** *Scatterplots showing correlations between H3K14ac / H3K9me2 ratio (top: local cohort; bottom: TCGA inferred data) and abundance of significant ecotypes. For all the graphs, the robust correlation score is indicated. CE2 – lymphocyte deficient, strongly linked to higher risk of death. CE6 – Enriched in normal tissue. CE8 – Enriched in age-related mutations. CE10 – Higher B cell content.*
