# Supplementary material
Source: Research Square preprint supplement (doi:10.21203/rs.3.rs-9763213/v1)
Supplement: Supplementary file 5 [file 4a617c4b5f39e707d4e35510.xlsx]

## Sheet: Peptides_Apicidin
Peptide	Modification	SW1116_C	SW1116_1UM_AMP	SW1116_10UM_AMP	DLD1_C	DLD1_1UM_AMP	DLD1_10UM_AMP
TKQTAR(H3_3_8)	H3_3_8 unmod	0.979288	0.912858	0.899339	0.922095	0.883422	0.624427
TKQTAR(H3_3_8)	H3_3_8 K4me1	0.020673	0.086423	0.097973	0.077528	0.115707	0.372943
TKQTAR(H3_3_8)	H3_3_8 K4me2	0	4e-06	7e-06	1e-06	0	2e-06
TKQTAR(H3_3_8)	H3_3_8 K4me3	0	0	0	0	0	0
TKQTAR(H3_3_8)	H3_3_8 K4ac	3.8e-05	0.000715	0.002681	0.000376	0.000871	0.002627
KSTGGKAPR(H3_9_17)	H3_9_17 unmod	0.312292	0.211311	0.038608	0.221478	0.211551	0.060363
KSTGGKAPR(H3_9_17)	H3_9_17 K9me1	0.218816	0.142941	0.018719	0.150509	0.11901	0.03129
KSTGGKAPR(H3_9_17)	H3_9_17 K9me2	0.204211	0.089685	0.022509	0.16824	0.131725	0.038762
KSTGGKAPR(H3_9_17)	H3_9_17 K9me3	0.086148	0.038669	0.009526	0.147174	0.131952	0.040756
KSTGGKAPR(H3_9_17)	H3_9_17 K9ac	0.014614	0.04299	0.041248	0.01273	0.031933	0.029664
KSTGGKAPR(H3_9_17)	H3_9_17 K14ac	0.055057	0.141385	0.248727	0.096504	0.121912	0.218005
KSTGGKAPR(H3_9_17)	H3_9_17 K9me1K14ac	0.049511	0.166252	0.218239	0.08511	0.09746	0.174412
KSTGGKAPR(H3_9_17)	H3_9_17 K9me2K14ac	0.045081	0.104508	0.151359	0.079753	0.094587	0.166801
KSTGGKAPR(H3_9_17)	H3_9_17 K9me3K14ac	0.012769	0.036371	0.049021	0.034648	0.044164	0.077138
KSTGGKAPR(H3_9_17)	H3_9_17 K9acK14ac	0.001502	0.025888	0.202044	0.003855	0.015707	0.16281
KQLATKAAR(H3_18_26)	H3_18_26 unmod	0.755838	0.451252	0.109071	0.745493	0.681754	0.191176
KQLATKAAR(H3_18_26)	H3_18_26 K23me1	0.000609	0.000798	0.000177	0.00057	0.00049	0.000402
KQLATKAAR(H3_18_26)	H3_18_26 K18me1	0.000453	0.000291	0.000177	0.00067	0.000594	0.000302
KQLATKAAR(H3_18_26)	H3_18_26 K18me1K23me1	0.000273	0.000202	7e-06	1.7e-05	1.2e-05	0.000167
KQLATKAAR(H3_18_26)	H3_18_26 K18ac	0.013163	0.04816	0.046785	0.029957	0.068473	0.106395
KQLATKAAR(H3_18_26)	H3_18_26 K23ac	0.228392	0.466221	0.620127	0.216252	0.232029	0.359085
KQLATKAAR(H3_18_26)	H3_18_26 K18acK23ac	0.001273	0.033076	0.223656	0.007041	0.016647	0.342473
KSAPATGGVKKPHR(H3_27_40)	H3_27_40 unmod	0.013662	0.019172	0.004505	0.036523	0.037444	0.007192
KSAPATGGVKKPHR(H3_27_40)	H3_27_40 K36me1	0.0048	0.004525	0.001241	0.008706	0.007892	0.002275
KSAPATGGVKKPHR(H3_27_40)	H3_27_40 K27me1	0.029769	0.028984	0.015535	0.06517	0.064451	0.03639
KSAPATGGVKKPHR(H3_27_40)	H3_27_40 K27me2	0.341504	0.233596	0.327392	0.196053	0.196455	0.206622
KSAPATGGVKKPHR(H3_27_40)	H3_27_40 K36me2	0.028985	0.014852	0.009156	0.034605	0.022489	0.009809
KSAPATGGVKKPHR(H3_27_40)	H3_27_40 K27me3	0.196074	0.279227	0.32224	0.070939	0.096547	0.156852
KSAPATGGVKKPHR(H3_27_40)	H3_27_40 K36me3	0.067448	0.06709	0.017346	0.049861	0.049223	0.026557
KSAPATGGVKKPHR(H3_27_40)	H3_27_40 K27me2K36me1	0.077837	0.074246	0.094902	0.104852	0.101433	0.109754
KSAPATGGVKKPHR(H3_27_40)	H3_27_40 K27me1K36me2	0.071766	0.054843	0.039953	0.114902	0.081752	0.057943
KSAPATGGVKKPHR(H3_27_40)	H3_27_40 K27me1K36me1	0.011886	0.007486	0.007448	0.020695	0.018394	0.007854
KSAPATGGVKKPHR(H3_27_40)	H3_27_40 K27me3K36me1	0.044692	0.08062	0.050404	0.036515	0.051307	0.070738
KSAPATGGVKKPHR(H3_27_40)	H3_27_40 K27me1K36me3	0.02905	0.03083	0.013631	0.021425	0.019506	0.010774
KSAPATGGVKKPHR(H3_27_40)	H3_27_40 K27me2K36me2	0.068131	0.076715	0.076183	0.203827	0.206133	0.238993
KSAPATGGVKKPHR(H3_27_40)	H3_27_40 K27me3K36me2	0.014381	0.027002	0.017768	0.03551	0.046033	0.055699
KSAPATGGVKKPHR(H3_27_40)	H3_27_40 K27ac	1.5e-05	0.000811	0.002295	0.000416	0.00094	0.002548
KSAPSTGGVKKPHR(H33_27_40)	H33_27_40 unmod	0.032574	0.05877	0.038093	0.034857	0.055808	0.044596
KSAPSTGGVKKPHR(H33_27_40)	H33_27_40 K36me1	0	0.01472	0.008302	0	0.035839	0.023175
KSAPSTGGVKKPHR(H33_27_40)	H33_27_40 K27me1	0.028756	0.059281	0.061175	0.008528	0.008329	0.023175
KSAPSTGGVKKPHR(H33_27_40)	H33_27_40 K27me2	0.246824	0.142345	0.21096	0.070388	0.089388	0.104031
KSAPSTGGVKKPHR(H33_27_40)	H33_27_40 K36me2	0.047274	0.029239	0.019578	0.081831	0.06698	0.045492
KSAPSTGGVKKPHR(H33_27_40)	H33_27_40 K27me3	0.13956	0.197404	0.254386	0.019071	0.065394	0.079761
KSAPSTGGVKKPHR(H33_27_40)	H33_27_40 K36me3	0.103898	0.04684	0.042572	0.051105	0.07185	0.016066
KSAPSTGGVKKPHR(H33_27_40)	H33_27_40 K27me2K36me1	0.070951	0.110752	0.081973	0.125353	0.085673	0.145718
KSAPSTGGVKKPHR(H33_27_40)	H33_27_40 K27me1K36me2	0.099578	0.082121	0.071702	0.182503	0.148764	0.105543
KSAPSTGGVKKPHR(H33_27_40)	H33_27_40 K27me1K36me1	0.021062	0.0018	0.023557	0.035649	0.038587	0.028487
KSAPSTGGVKKPHR(H33_27_40)	H33_27_40 K27me3K36me1	0.033503	0.071252	0.044158	0.027747	0.043003	0.039124
KSAPSTGGVKKPHR(H33_27_40)	H33_27_40 K27me1K36me3	0.062338	0.056795	0.023016	0.059039	0.04398	0.023584
KSAPSTGGVKKPHR(H33_27_40)	H33_27_40 K27me2K36me2	0.077653	0.069059	0.071349	0.239745	0.166455	0.148908
KSAPSTGGVKKPHR(H33_27_40)	H33_27_40 K27me3K36me2	0.032965	0.056612	0.029138	0.064122	0.075212	0.070339
KSAPSTGGVKKPHR(H33_27_40)	H33_27_40 K27ac	0.003064	0.00301	0.020043	6.4e-05	0.004735	0.102
YRPGTVALR(H3_41_49)	H3_41_49 unmod	0.9999	1	0.999994	0.999996	0.999981	0.99997
YRPGTVALR(H3_41_49)	H3_41_49 Y41ph	0.0001	0	6e-06	4e-06	1.9e-05	3e-05
YQKSTELLIR(H3_54_63)	H3_54_63 unmod	0.990568	0.998249	0.986862	0.998651	0.997725	0.978552
YQKSTELLIR(H3_54_63)	H3_54_63 K56me1	0.000341	0.000171	4.3e-05	4.8e-05	0.000154	6.4e-05
YQKSTELLIR(H3_54_63)	H3_54_63 K56me2	0.009036	0.001278	0.013037	0.000811	0.001541	0.021291
YQKSTELLIR(H3_54_63)	H3_54_63 K56me3	1.3e-05	0.000287	4.2e-05	0.000242	0.000553	6.1e-05
YQKSTELLIR(H3_54_63)	H3_54_63 K56ac	4.2e-05	1.5e-05	1.6e-05	0.000248	2.8e-05	3.2e-05
EIAQDFKTDLR(H3_73_83)	H3_73_83 unmod	0.906229	0.8757	0.8805	0.90006	0.893014	0.842156
EIAQDFKTDLR(H3_73_83)	H3_73_83 K79me1	0.076083	0.097181	0.095607	0.084718	0.083731	0.124568
EIAQDFKTDLR(H3_73_83)	H3_73_83 K79me2	0.017575	0.02625	0.023777	0.014978	0.023227	0.033252
EIAQDFKTDLR(H3_73_83)	H3_73_83 K79me3	9e-06	1.3e-05	0	2.2e-05	9e-06	1.5e-05
EIAQDFKTDLR(H3_73_83)	H3_73_83 K79ac	0.000104	0.000856	0.000116	0.000222	1.9e-05	9e-06
VTIMPKDIQLAR(H3_117_128)	H3_117_128 unmod	0.999973	0.999733	0.999969	0.998031	0.999063	0.99788
VTIMPKDIQLAR(H3_117_128)	H3_117_128 K122ac	2.7e-05	0.000267	3.1e-05	0.001969	0.000937	0.00212
GKGGKGLGKGGAKR(H4_4_17)	H4_4_17 unmod	0.710095	0.105325	0.018444	0.48591	0.233662	0.036277
GKGGKGLGKGGAKR(H4_4_17)	H4_4_17 K5ac	0.024734	0.047475	0.001699	0.037185	0.034027	0.007138
GKGGKGLGKGGAKR(H4_4_17)	H4_4_17 K8ac	0.03229	0.061269	0.001503	0.035548	0.051302	0.016428
GKGGKGLGKGGAKR(H4_4_17)	H4_4_17 K12ac	0.057964	0.070743	0.003191	0.071864	0.066817	0.006867
GKGGKGLGKGGAKR(H4_4_17)	H4_4_17 K16ac	0.139237	0.170317	0.040531	0.249151	0.269027	0.070845
GKGGKGLGKGGAKR(H4_4_17)	H4_4_17 K5acK8ac	0.000671	0.007287	0.002532	0.001863	0.003511	0.004173
GKGGKGLGKGGAKR(H4_4_17)	H4_4_17 K5acK12ac	0.001486	0.041834	0.020463	0.006452	0.016281	0.016206
GKGGKGLGKGGAKR(H4_4_17)	H4_4_17 K5acK16ac	0.001625	0	0.005067	0.003863	0.004851	0.00037
GKGGKGLGKGGAKR(H4_4_17)	H4_4_17 K8acK12ac	0	0.010475	0	0	0	0
GKGGKGLGKGGAKR(H4_4_17)	H4_4_17 K8acK16ac	0.009041	0.042754	0.026198	0.014982	0.032494	0.020976
GKGGKGLGKGGAKR(H4_4_17)	H4_4_17 K12acK16ac	0.017603	0.187055	0.128473	0.074113	0.181196	0.120321
GKGGKGLGKGGAKR(H4_4_17)	H4_4_17 K5acK8acK12ac	0.000494	0.011444	0.030816	0.000721	0.005863	0.046589
GKGGKGLGKGGAKR(H4_4_17)	H4_4_17 K5acK8acK16ac	0.000987	0.045596	0.018833	0.002738	0.019141	0.03243
GKGGKGLGKGGAKR(H4_4_17)	H4_4_17 K5acK12acK16ac	0.000633	0.041264	0.16676	0.002697	0.020928	0.077118
GKGGKGLGKGGAKR(H4_4_17)	H4_4_17 K8acK12acK16ac	0.002798	0.103546	0.162094	0.012315	0.045254	0.13585
GKGGKGLGKGGAKR(H4_4_17)	H4_4_17 K5acK8acK12acK16ac	0.000343	0.053617	0.373395	0.000599	0.015646	0.408411
KVLR(H4_20_23)	H4_20_23 unmod	0.089081	0.075806	0.005715	0.066403	0.051106	0.002008
KVLR(H4_20_23)	H4_20_23 K20me1	0.23004	0.204456	0.17096	0.132224	0.162743	0.096915
KVLR(H4_20_23)	H4_20_23 K20me2	0.674999	0.699521	0.799981	0.784088	0.761313	0.862024
KVLR(H4_20_23)	H4_20_23 K20me3	0.005879	0.020215	0.023341	0.017201	0.024789	0.038885
KVLR(H4_20_23)	H4_20_23 K20ac	1e-06	2e-06	2e-06	8.4e-05	5e-05	0.000167
DNIQGITKPAIR(H4_24_35)	H4_24_35 unmod	1	1	1	1	1	1
RGGVKR(H4_40_45)	H4_40_45 unmod	1	0.99999	0.99999	0.999219	0.99876	0.999474
RGGVKR(H4_40_45)	H4_40_45 K44ac	0	1e-05	1e-05	0.000781	0.00124	0.000526
KTVTAMDVVYALKR(H4_79_92)	H4_79_92 unmod	1	1	1	1	1	1
unmod(H1_1_35)	H1_1_35 H12.SETAPAAPAAAPPAEKAPVKKKAAKKAGGTPR	0.046574	0.037407	0.048892	0.087624	0.062432	0.041818
unmod(H1_1_35)	H1_1_35 H13.SETAPLAPTIPAPAEKTPVKKKAKKAGATAGKR	0.321943	0.409359	0.205604	0.121083	0.07685	0.020616
unmod(H1_1_35)	H1_1_35 H14.SETAPAAPAAPAPAEKTPVKKKAR	0.631483	0.553233	0.745504	0.594132	0.713437	0.726326
unmod(H1_1_35)	H1_1_35 H15.SETAPAETATPAPVEKSPAKKKATKKAAGAGAAKR	0	0	0	0.197161	0.147282	0.21124
unmod(H1_54_81)	H1_54_81 H11.GGVSLAALKKALAAAGYDVEKNNSR	0.767917	0.632495	0.450767	0.106223	0.547424	0.934515
unmod(H1_54_81)	H1_54_81 H1v234.SGVSLAALKKALAAAGYDVEKNNSR	0.226718	0.355889	0.54827	0.870938	0.182381	0.058355
unmod(H1_54_81)	H1_54_81 H15.NGLSLAALKKALAAGGYDVEKNNSR	0.005365	0	0	0.022419	0.264227	0.004648
unmod(H1_54_81)	H1_54_81 H1T.VGMSLVALKKALAAAGYDVEKNNSR	0	0.011616	0.000963	0.00042	0.005968	0.002482
KGNYAER(H2A1_36_42)	H2A1_36_42 unmod	0.999996	1	1	0.999996	0.999989	1
KGNYAER(H2A1_36_42)	H2A1_36_42 K36ac	4e-06	0	0	4e-06	1.1e-05	0
KGNYSER(H2A3_36_42)	H2A3_36_42 unmod	0.999985	1	0.998092	0.999946	0.999896	0.999908
KGNYSER(H2A3_36_42)	H2A3_36_42 K36ac	1.5e-05	0	0.001908	5.4e-05	0.000104	9.2e-05
KGHYAER(H2AX_36_42)	H2AX_36_42 unmod	0.999899	0.999899	0.99994	0.999887	0.99779	0.999875
KGHYAER(H2AX_36_42)	H2AX_36_42 K36ac	0.000101	0.000101	6e-05	0.000113	0.00221	0.000125
GKQGGKAR(H2A1_4_11)	H2A1_4_11 unmod	0.994779	0.901726	0.59763	0.965012	0.905823	0.513253
GKQGGKAR(H2A1_4_11)	H2A1_4_11 K5ac	0.004112	0.084207	0.327607	0.02944	0.084118	0.320239
GKQGGKAR(H2A1_4_11)	H2A1_4_11 K9ac	0.000846	0.002642	0.019488	0.002689	0.002229	0.024191
GKQGGKAR(H2A1_4_11)	H2A1_4_11 K5acK9ac	0.000109	0.005948	0.040762	0.000859	0.004851	0.114273
GKQGGKAR(H2A1_4_11)	H2A1_4_11 K9me1	0.000134	0.000389	0.00022	0.000149	0.000305	0.000363
GKQGGKAR(H2A1_4_11)	H2A1_4_11 K5me1	1.9e-05	0.005088	0.014293	0.001851	0.002674	0.027681
GKQGGKVR(H2AJ_4_11)	H2AJ_4_11 unmod	0.447262	0.988549	0.997381	0.341727	0.483874	0.996502
GKQGGKVR(H2AJ_4_11)	H2AJ_4_11 K5ac	0.00507	0.000136	0.000105	0.003206	0.084599	0.000332
GKQGGKVR(H2AJ_4_11)	H2AJ_4_11 K9ac	0.00507	0.000136	0.000105	0.003206	0.084599	0.000332
GKQGGKVR(H2AJ_4_11)	H2AJ_4_11 K5acK9ac	0.031226	0.000293	0.000952	0.266753	0.206438	0.000771
GKQGGKVR(H2AJ_4_11)	H2AJ_4_11 K9me1	0.505768	0.010751	0.001294	0.376909	0.130734	0.001722
GKQGGKVR(H2AJ_4_11)	H2AJ_4_11 K5me1	0.005605	0.000136	0.000163	0.008199	0.009756	0.000341
GKTGGKAR(H2AX_4_11)	H2AX_4_11 unmod	0.141554	0.112961	0.093347	0.133202	0.132786	0.060443
GKTGGKAR(H2AX_4_11)	H2AX_4_11 K5ac	6e-05	0.013948	0.056343	0.004404	0.017444	0.048798
GKTGGKAR(H2AX_4_11)	H2AX_4_11 K9ac	1.1e-05	0.004862	0.013811	0.000804	0.005122	0.01969
GKTGGKAR(H2AX_4_11)	H2AX_4_11 K5acK9ac	0.000238	0.001375	0.011152	1.7e-05	0.001074	0.025889
GKTGGKAR(H2AX_4_11)	H2AX_4_11 K9me1	0.637106	0.628038	0.607247	0.633532	0.598522	0.606755
GKTGGKAR(H2AX_4_11)	H2AX_4_11 K5me1	0.22103	0.238817	0.218101	0.22804	0.245052	0.238426
SGRGKQGGKAR(H2A1_1_11)	H2A1_1_11 unmod	0.781882	0.596614	0.77949	0.75759	0.956157	0.887619
SGRGKQGGKAR(H2A1_1_11)	H2A1_1_11 S1ac	0.09198	0.377223	0.205476	0.131365	0.014294	0.068551
SGRGKQGGKAR(H2A1_1_11)	H2A1_1_11 K5ac	0.126138	0.026163	0.015034	0.111045	0.029548	0.04383
AGGKAGKDSGKAKAKAVSR(H2AV_1_19)	H2AV_1_19 unmod	0.997161	0.513575	0.274794	0.879094	0.632244	0.149492
AGGKAGKDSGKAKAKAVSR(H2AV_1_19)	H2AV_1_19 K4ac	0.001269	0.116337	0.213472	0.041557	0.106256	0.129861
AGGKAGKDSGKAKAKAVSR(H2AV_1_19)	H2AV_1_19 K7ac	0	0.075225	0.071437	0.020411	0.076961	0.082382
AGGKAGKDSGKAKAKAVSR(H2AV_1_19)	H2AV_1_19 K11ac	0.000846	0.067331	0.019088	0.029853	0.076029	0.03869
AGGKAGKDSGKAKAKAVSR(H2AV_1_19)	H2AV_1_19 K15ac	0	0	0	0	0	0
AGGKAGKDSGKAKAKAVSR(H2AV_1_19)	H2AV_1_19 K4acK7ac	0.000121	0.132866	0.234513	0.004848	0.079046	0.330496
AGGKAGKDSGKAKAKAVSR(H2AV_1_19)	H2AV_1_19 K4acK11ac	0.000121	0.004193	0	0.004848	0	0.010585
AGGKAGKDSGKAKAKAVSR(H2AV_1_19)	H2AV_1_19 K4acK15ac	0.000121	0	0	0.004848	0	0
AGGKAGKDSGKAKAKAVSR(H2AV_1_19)	H2AV_1_19 K7acK11ac	0.000121	0.02856	0.035566	0.004848	0.018241	0
AGGKAGKDSGKAKAKAVSR(H2AV_1_19)	H2AV_1_19 K7acK15ac	0.000121	0	0	0.004848	0	0
AGGKAGKDSGKAKAKAVSR(H2AV_1_19)	H2AV_1_19 K11acK15ac	0.000121	0.029663	0.028897	0.004848	0	0.088211
AGGKAGKDSGKAKAKAVSR(H2AV_1_19)	H2AV_1_19 K7acK11acK15ac	0	0	0	0	0.002806	0
AGGKAGKDSGKAKAKAVSR(H2AV_1_19)	H2AV_1_19 K4acK11acK15ac	0	0	0	0	0.002806	0
AGGKAGKDSGKAKAKAVSR(H2AV_1_19)	H2AV_1_19 K4acK7acK15ac	0	0.000322	0.001222	0	0.002806	0.001703
AGGKAGKDSGKAKAKAVSR(H2AV_1_19)	H2AV_1_19 K4acK7acK11ac	0	0.031927	0.12101	0	0.002806	0.168581
AGGKAGKDSGKAKAKAVSR(H2AV_1_19)	H2AV_1_19 K4acK7acK11acK15ac	0	0	0	0	0	0
AGGKAGKDSGKAKTKAVSR(H2AZ_1_19)	H2AZ_1_19 unmod	0.93542	0.425662	0.168838	0.848432	0.642414	0.115393
AGGKAGKDSGKAKTKAVSR(H2AZ_1_19)	H2AZ_1_19 K4ac	0.032819	0.137941	0.117906	0.040386	0.073825	0.084559
AGGKAGKDSGKAKTKAVSR(H2AZ_1_19)	H2AZ_1_19 K7ac	0	0.104951	0.101589	0.050213	0.084904	0.066474
AGGKAGKDSGKAKTKAVSR(H2AZ_1_19)	H2AZ_1_19 K11ac	0.031595	0.073416	0.02836	0.040079	0.082433	0.037838
AGGKAGKDSGKAKTKAVSR(H2AZ_1_19)	H2AZ_1_19 K15ac	0	0.002978	0.002817	0.002217	0.004934	0.001627
AGGKAGKDSGKAKTKAVSR(H2AZ_1_19)	H2AZ_1_19 K4acK7ac	0	0.092397	0.182993	0	0.042384	0.220263
AGGKAGKDSGKAKTKAVSR(H2AZ_1_19)	H2AZ_1_19 K4acK11ac	0	0.01685	0.022034	0.00324	0.007051	0.043086
AGGKAGKDSGKAKTKAVSR(H2AZ_1_19)	H2AZ_1_19 K4acK15ac	0	0	0	0	0	0
AGGKAGKDSGKAKTKAVSR(H2AZ_1_19)	H2AZ_1_19 K7acK11ac	0	0.032284	0.075221	0.010394	0.020211	0.035147
AGGKAGKDSGKAKTKAVSR(H2AZ_1_19)	H2AZ_1_19 K7acK15ac	0	0	0	0	0	0
AGGKAGKDSGKAKTKAVSR(H2AZ_1_19)	H2AZ_1_19 K11acK15ac	0	0.011231	0.032952	0.000342	0.008839	0.022632
AGGKAGKDSGKAKTKAVSR(H2AZ_1_19)	H2AZ_1_19 K7acK11acK15ac	4.1e-05	0.001244	0.004621	0	0.001308	0.001034
AGGKAGKDSGKAKTKAVSR(H2AZ_1_19)	H2AZ_1_19 K4acK11acK15ac	4.1e-05	0	0	0	0	0.003675
AGGKAGKDSGKAKTKAVSR(H2AZ_1_19)	H2AZ_1_19 K4acK7acK15ac	4.1e-05	0.000995	0	0.00032	0	0
AGGKAGKDSGKAKTKAVSR(H2AZ_1_19)	H2AZ_1_19 K4acK7acK11ac	4.1e-05	0.100052	0.262669	0.004377	0.031677	0.36821
AGGKAGKDSGKAKTKAVSR(H2AZ_1_19)	H2AZ_1_19 K4acK7acK11acK15ac	0	0	0	0	2.1e-05	6.2e-05
AKAKTR(H2A1_12_17)	H2A1_12_17 unmod	0.654286	0.59571	0.567485	0.585164	0.568745	0.526574
AKAKTR(H2A1_12_17)	H2A1_12_17 K13ac	0.000225	0.000228	0.000254	0.00022	0	0.000387
AKAKTR(H2A1_12_17)	H2A1_12_17 K15ac	0.345178	0.402734	0.430229	0.413444	0.429484	0.471452
AKAKTR(H2A1_12_17)	H2A1_12_17 K13acK15ac	0.000308	0.001327	0.002031	0.001168	0.00177	0.001585
AKAKTR(H2A1_12_17)	H2A1_12_17 K15me1	1e-06	0	1e-06	2e-06	1e-06	1e-06
AKAKTR(H2A1_12_17)	H2A1_12_17 K13me1	1e-06	0	1e-06	2e-06	1e-06	1e-06
AKAKSR(H2A3_12_17)	H2A3_12_17 unmod	0.345279	0.402817	0.430254	0.413675	0.429989	0.471871
AKAKSR(H2A3_12_17)	H2A3_12_17 K13ac	3.1e-05	9.1e-05	0.000378	0.000115	2.6e-05	8.6e-05
AKAKSR(H2A3_12_17)	H2A3_12_17 K15ac	0.00027	0.001236	0.001719	0.001004	0.000347	0.001408
AKAKSR(H2A3_12_17)	H2A3_12_17 K13acK15ac	0.000369	0.000361	0.000466	2.6e-05	0.000224	2.6e-05
AKAKSR(H2A3_12_17)	H2A3_12_17 K15me1	0.654039	0.595495	0.56717	0.58518	0.569414	0.52661
AKAKSR(H2A3_12_17)	H2A3_12_17 K13me1	1.1e-05	0	1.3e-05	0	0	0
DNKKTR(H2A1_72_77)	H2A1_72_77 unmod	0.999962	0.999899	0.999967	0.999985	0.999975	0.99993
DNKKTR(H2A1_72_77)	H2A1_72_77 K74ac	3.8e-05	0.000101	3.3e-05	1.5e-05	2.5e-05	7e-05
HLQLAIR(H2A_82_88)	H2A_82_88 unmod	1	1	1	1	1	1
unmod(H2A_1_88)	H2A_1_88 H2A14s.HLQLAIR	0.902772	0.942356	0.959341	0.884304	0.90039	0.970737
unmod(H2A_1_88)	H2A_1_88 H2AZ.AGGKAGKDSGKAKTKAVSR	0.037612	0.021859	0.00795	0.059148	0.046024	0.008418
unmod(H2A_1_88)	H2A_1_88 H2AY.SAKAGVIFPVGR	0.002343	0.002954	0.00334	0.007202	0.006395	0.006006
unmod(H2A_1_88)	H2A_1_88 H2AX.GKTGGKAR	0.057272	0.032831	0.02937	0.049346	0.047192	0.014839
unmod(H2B_1_29)	H2B_1_29 1C.PEPAKSAPAPKKGSKKAVTKAQKKDGKKR	0.589459	0.57271	0.547089	0.52932	0.506608	0.397721
unmod(H2B_1_29)	H2B_1_29 1H.PDPAKSAPAPKKGSKKAVTKAQKKDGKKR	0.181148	0.171221	0.175337	0.177167	0.172317	0.213522
unmod(H2B_1_29)	H2B_1_29 2F.PDPAKSAPAPKKGSKKAVTKVQKKDGKKR	0.069282	0.072475	0.093601	0.093258	0.105914	0.101427
unmod(H2B_1_29)	H2B_1_29 1B.PEPSKSAPAPKKGSKKAITKAQKKDGKKR	0.0002	0.002863	0.000336	0.000859	5e-05	0.018079
unmod(H2B_1_29)	H2B_1_29 1N.PEPSKSAPAPKKGSKKAVTKAQKKDGKKR	0.026831	0.042232	0.036168	0.037541	0.045611	0.130588
unmod(H2B_1_29)	H2B_1_29 1D.PEPTKSAPAPKKGSKKAVTKAQKKDGKKR	0.087293	0.09911	0.110998	0.135222	0.142357	0.11915
unmod(H2B_1_29)	H2B_1_29 1M.PEPVKSAPVPKKGSKKAINKAQKKDGKKR	0.018128	0.012903	0.012621	0.006062	0.007534	0.005153
unmod(H2B_1_29)	H2B_1_29 1L.PELAKSAPAPKKGSKKAVTKAQKKDGKKR	0.027659	0.026487	0.023851	0.020571	0.019608	0.014361

## Sheet: Peptides_UNC0642
Peptide	Modification	SW1116_C	SW1116_1UM_UNCO6420	SW1116_10UM_UNCO6420	DLD1_C	DLD1_1UM_UNCO6420	DLD1_10UM_UNCO6420
TKQTAR(H3_3_8)	H3_3_8 unmod	0.979288	0.988157	0.970723	0.922095	0.910116	0.915227
TKQTAR(H3_3_8)	H3_3_8 K4me1	0.020673	0.011592	0.029126	0.077528	0.08932	0.08434
TKQTAR(H3_3_8)	H3_3_8 K4me2	0	0	0	1e-06	2.6e-05	4e-06
TKQTAR(H3_3_8)	H3_3_8 K4me3	0	0	0	0	1e-06	0
TKQTAR(H3_3_8)	H3_3_8 K4ac	3.8e-05	0.000251	0.000151	0.000376	0.000538	0.000429
KSTGGKAPR(H3_9_17)	H3_9_17 unmod	0.312292	0.387966	0.540251	0.221478	0.267465	0.337368
KSTGGKAPR(H3_9_17)	H3_9_17 K9me1	0.218816	0.186481	0.107998	0.150509	0.137437	0.101009
KSTGGKAPR(H3_9_17)	H3_9_17 K9me2	0.204211	0.149114	0.072393	0.16824	0.139455	0.097143
KSTGGKAPR(H3_9_17)	H3_9_17 K9me3	0.086148	0.067696	0.0832	0.147174	0.137706	0.143976
KSTGGKAPR(H3_9_17)	H3_9_17 K9ac	0.014614	0.01523	0.022564	0.01273	0.026364	0.028169
KSTGGKAPR(H3_9_17)	H3_9_17 K14ac	0.055057	0.089097	0.117423	0.096504	0.126413	0.160501
KSTGGKAPR(H3_9_17)	H3_9_17 K9me1K14ac	0.049511	0.050716	0.025216	0.08511	0.071763	0.055464
KSTGGKAPR(H3_9_17)	H3_9_17 K9me2K14ac	0.045081	0.039586	0.016749	0.079753	0.057623	0.040296
KSTGGKAPR(H3_9_17)	H3_9_17 K9me3K14ac	0.012769	0.011764	0.010642	0.034648	0.030401	0.028525
KSTGGKAPR(H3_9_17)	H3_9_17 K9acK14ac	0.001502	0.00235	0.003563	0.003855	0.005373	0.00755
KQLATKAAR(H3_18_26)	H3_18_26 unmod	0.755838	0.731671	0.714814	0.745493	0.724945	0.717977
KQLATKAAR(H3_18_26)	H3_18_26 K23me1	0.000609	0.00065	0.000832	0.00057	0.000607	0.000694
KQLATKAAR(H3_18_26)	H3_18_26 K18me1	0.000453	0.000449	0.000416	0.00067	0.000798	0.000877
KQLATKAAR(H3_18_26)	H3_18_26 K18me1K23me1	0.000273	9.4e-05	3.3e-05	1.7e-05	2.1e-05	4e-06
KQLATKAAR(H3_18_26)	H3_18_26 K18ac	0.013163	0.049527	0.014056	0.029957	0.036513	0.043188
KQLATKAAR(H3_18_26)	H3_18_26 K23ac	0.228392	0.216179	0.267302	0.216252	0.228684	0.227671
KQLATKAAR(H3_18_26)	H3_18_26 K18acK23ac	0.001273	0.001429	0.002547	0.007041	0.008432	0.009588
KSAPATGGVKKPHR(H3_27_40)	H3_27_40 unmod	0.013662	0.019859	0.018474	0.036523	0.034456	0.042584
KSAPATGGVKKPHR(H3_27_40)	H3_27_40 K36me1	0.0048	0.006666	0.006812	0.008706	0.009851	0.010113
KSAPATGGVKKPHR(H3_27_40)	H3_27_40 K27me1	0.029769	0.042258	0.039354	0.06517	0.070219	0.073596
KSAPATGGVKKPHR(H3_27_40)	H3_27_40 K27me2	0.341504	0.317908	0.316392	0.196053	0.179651	0.173344
KSAPATGGVKKPHR(H3_27_40)	H3_27_40 K36me2	0.028985	0.032392	0.028997	0.034605	0.037106	0.034805
KSAPATGGVKKPHR(H3_27_40)	H3_27_40 K27me3	0.196074	0.176923	0.173804	0.070939	0.072833	0.074733
KSAPATGGVKKPHR(H3_27_40)	H3_27_40 K36me3	0.067448	0.056047	0.053141	0.049861	0.047468	0.034879
KSAPATGGVKKPHR(H3_27_40)	H3_27_40 K27me2K36me1	0.077837	0.094788	0.089303	0.104852	0.102132	0.112777
KSAPATGGVKKPHR(H3_27_40)	H3_27_40 K27me1K36me2	0.071766	0.081798	0.074663	0.114902	0.127036	0.130962
KSAPATGGVKKPHR(H3_27_40)	H3_27_40 K27me1K36me1	0.011886	0.015984	0.015636	0.020695	0.022814	0.02507
KSAPATGGVKKPHR(H3_27_40)	H3_27_40 K27me3K36me1	0.044692	0.044015	0.048774	0.036515	0.033893	0.033658
KSAPATGGVKKPHR(H3_27_40)	H3_27_40 K27me1K36me3	0.02905	0.028846	0.028498	0.021425	0.022138	0.022359
KSAPATGGVKKPHR(H3_27_40)	H3_27_40 K27me2K36me2	0.068131	0.067017	0.085231	0.203827	0.202907	0.19623
KSAPATGGVKKPHR(H3_27_40)	H3_27_40 K27me3K36me2	0.014381	0.015368	0.020911	0.03551	0.037078	0.034653
KSAPATGGVKKPHR(H3_27_40)	H3_27_40 K27ac	1.5e-05	0.000131	1e-05	0.000416	0.00042	0.000239
KSAPSTGGVKKPHR(H33_27_40)	H33_27_40 unmod	0.032574	0.041092	0.041818	0.034857	0.033034	0.03419
KSAPSTGGVKKPHR(H33_27_40)	H33_27_40 K36me1	0	0	0.016504	0	0.029107	0.040209
KSAPSTGGVKKPHR(H33_27_40)	H33_27_40 K27me1	0.028756	0.034546	0.029546	0.008528	0.021838	0.013118
KSAPSTGGVKKPHR(H33_27_40)	H33_27_40 K27me2	0.246824	0.17871	0.211976	0.070388	0.056006	0.05924
KSAPSTGGVKKPHR(H33_27_40)	H33_27_40 K36me2	0.047274	0.061718	0.047989	0.081831	0.090171	0.11575
KSAPSTGGVKKPHR(H33_27_40)	H33_27_40 K27me3	0.13956	0.126392	0.128316	0.019071	0.026062	0.028936
KSAPSTGGVKKPHR(H33_27_40)	H33_27_40 K36me3	0.103898	0.07119	0.099729	0.051105	0.079895	0.045651
KSAPSTGGVKKPHR(H33_27_40)	H33_27_40 K27me2K36me1	0.070951	0.113819	0.052671	0.125353	0.090288	0.132967
KSAPSTGGVKKPHR(H33_27_40)	H33_27_40 K27me1K36me2	0.099578	0.11704	0.090858	0.182503	0.141587	0.155795
KSAPSTGGVKKPHR(H33_27_40)	H33_27_40 K27me1K36me1	0.021062	0.026964	0.025786	0.035649	0.040623	0.0388
KSAPSTGGVKKPHR(H33_27_40)	H33_27_40 K27me3K36me1	0.033503	0.0385	0.03839	0.027747	0.024722	0.018732
KSAPSTGGVKKPHR(H33_27_40)	H33_27_40 K27me1K36me3	0.062338	0.070778	0.064735	0.059039	0.050042	0.056693
KSAPSTGGVKKPHR(H33_27_40)	H33_27_40 K27me2K36me2	0.077653	0.083597	0.105961	0.239745	0.26104	0.188975
KSAPSTGGVKKPHR(H33_27_40)	H33_27_40 K27me3K36me2	0.032965	0.031935	0.045639	0.064122	0.055448	0.070757
KSAPSTGGVKKPHR(H33_27_40)	H33_27_40 K27ac	0.003064	0.003719	8.2e-05	6.4e-05	0.000137	0.000187
YRPGTVALR(H3_41_49)	H3_41_49 unmod	0.9999	0.999995	0.999997	0.999996	0.999991	0.999998
YRPGTVALR(H3_41_49)	H3_41_49 Y41ph	0.0001	5e-06	3e-06	4e-06	9e-06	2e-06
YQKSTELLIR(H3_54_63)	H3_54_63 unmod	0.990568	0.998714	0.978272	0.998651	0.98067	0.998476
YQKSTELLIR(H3_54_63)	H3_54_63 K56me1	0.000341	3.2e-05	0.000139	4.8e-05	8.8e-05	2.2e-05
YQKSTELLIR(H3_54_63)	H3_54_63 K56me2	0.009036	0.00107	0.017946	0.000811	0.018837	0.001066
YQKSTELLIR(H3_54_63)	H3_54_63 K56me3	1.3e-05	0.000168	0.003629	0.000242	0.000378	0.000416
YQKSTELLIR(H3_54_63)	H3_54_63 K56ac	4.2e-05	1.5e-05	1.5e-05	0.000248	2.7e-05	2e-05
EIAQDFKTDLR(H3_73_83)	H3_73_83 unmod	0.906229	0.88699	0.879986	0.90006	0.903185	0.896872
EIAQDFKTDLR(H3_73_83)	H3_73_83 K79me1	0.076083	0.088678	0.09377	0.084718	0.081237	0.090679
EIAQDFKTDLR(H3_73_83)	H3_73_83 K79me2	0.017575	0.024328	0.025892	0.014978	0.01547	0.012099
EIAQDFKTDLR(H3_73_83)	H3_73_83 K79me3	9e-06	0	3.4e-05	2.2e-05	0.000107	4.2e-05
EIAQDFKTDLR(H3_73_83)	H3_73_83 K79ac	0.000104	4e-06	0.000318	0.000222	2e-06	0.000308
VTIMPKDIQLAR(H3_117_128)	H3_117_128 unmod	0.999973	0.99996	0.99984	0.998031	0.998172	0.998478
VTIMPKDIQLAR(H3_117_128)	H3_117_128 K122ac	2.7e-05	4e-05	0.00016	0.001969	0.001828	0.001522
GKGGKGLGKGGAKR(H4_4_17)	H4_4_17 unmod	0.710095	0.689621	0.717953	0.48591	0.457397	0.4564
GKGGKGLGKGGAKR(H4_4_17)	H4_4_17 K5ac	0.024734	0.026721	0.028174	0.037185	0.020816	0.013056
GKGGKGLGKGGAKR(H4_4_17)	H4_4_17 K8ac	0.03229	0.027994	0.029744	0.035548	0.015462	0.025404
GKGGKGLGKGGAKR(H4_4_17)	H4_4_17 K12ac	0.057964	0.070993	0.069755	0.071864	0.167077	0.032508
GKGGKGLGKGGAKR(H4_4_17)	H4_4_17 K16ac	0.139237	0.141225	0.112688	0.249151	0.206802	0.345773
GKGGKGLGKGGAKR(H4_4_17)	H4_4_17 K5acK8ac	0.000671	0.000608	0.000832	0.001863	0.007995	0.008348
GKGGKGLGKGGAKR(H4_4_17)	H4_4_17 K5acK12ac	0.001486	0.002844	0.002876	0.006452	0.018562	0.018822
GKGGKGLGKGGAKR(H4_4_17)	H4_4_17 K5acK16ac	0.001625	0.002101	0.000966	0.003863	0	0
GKGGKGLGKGGAKR(H4_4_17)	H4_4_17 K8acK12ac	0	0	0	0	0.003433	0.004133
GKGGKGLGKGGAKR(H4_4_17)	H4_4_17 K8acK16ac	0.009041	0.009128	0.010029	0.014982	0.030222	0.025012
GKGGKGLGKGGAKR(H4_4_17)	H4_4_17 K12acK16ac	0.017603	0.021941	0.019474	0.074113	0.050788	0.048809
GKGGKGLGKGGAKR(H4_4_17)	H4_4_17 K5acK8acK12ac	0.000494	0.000663	0.000683	0.000721	0.002456	0.000564
GKGGKGLGKGGAKR(H4_4_17)	H4_4_17 K5acK8acK16ac	0.000987	0.001142	0.001488	0.002738	0.001978	0.00306
GKGGKGLGKGGAKR(H4_4_17)	H4_4_17 K5acK12acK16ac	0.000633	0.001316	0.00102	0.002697	0.008318	0.003209
GKGGKGLGKGGAKR(H4_4_17)	H4_4_17 K8acK12acK16ac	0.002798	0.003144	0.003521	0.012315	0.007138	0.013266
GKGGKGLGKGGAKR(H4_4_17)	H4_4_17 K5acK8acK12acK16ac	0.000343	0.000558	0.000795	0.000599	0.001554	0.001636
KVLR(H4_20_23)	H4_20_23 unmod	0.089081	0.088521	0.103872	0.066403	0.072265	0.067233
KVLR(H4_20_23)	H4_20_23 K20me1	0.23004	0.207869	0.225188	0.132224	0.171972	0.167646
KVLR(H4_20_23)	H4_20_23 K20me2	0.674999	0.69865	0.665157	0.784088	0.737544	0.748677
KVLR(H4_20_23)	H4_20_23 K20me3	0.005879	0.004946	0.005758	0.017201	0.018045	0.016296
KVLR(H4_20_23)	H4_20_23 K20ac	1e-06	1.4e-05	2.5e-05	8.4e-05	0.000174	0.000149
DNIQGITKPAIR(H4_24_35)	H4_24_35 unmod	1	1	1	1	1	1
RGGVKR(H4_40_45)	H4_40_45 unmod	1	0.999825	0.999991	0.999219	0.999007	0.997982
RGGVKR(H4_40_45)	H4_40_45 K44ac	0	0.000175	9e-06	0.000781	0.000993	0.002018
KTVTAMDVVYALKR(H4_79_92)	H4_79_92 unmod	1	1	1	1	1	1
unmod(H1_1_35)	H1_1_35 H12.SETAPAAPAAAPPAEKAPVKKKAAKKAGGTPR	0.046574	0.091627	0.077593	0.087624	0.101085	0.083837
unmod(H1_1_35)	H1_1_35 H13.SETAPLAPTIPAPAEKTPVKKKAKKAGATAGKR	0.321943	0.287065	0.233733	0.121083	0.112522	0.149958
unmod(H1_1_35)	H1_1_35 H14.SETAPAAPAAPAPAEKTPVKKKAR	0.631483	0.621308	0.688674	0.594132	0.576639	0.558318
unmod(H1_1_35)	H1_1_35 H15.SETAPAETATPAPVEKSPAKKKATKKAAGAGAAKR	0	0	0	0.197161	0.209754	0.207887
unmod(H1_54_81)	H1_54_81 H11.GGVSLAALKKALAAAGYDVEKNNSR	0.767917	0.164583	0.275393	0.106223	0.393431	0.189996
unmod(H1_54_81)	H1_54_81 H1v234.SGVSLAALKKALAAAGYDVEKNNSR	0.226718	0.82855	0.718716	0.870938	0.570039	0.757588
unmod(H1_54_81)	H1_54_81 H15.NGLSLAALKKALAAGGYDVEKNNSR	0.005365	0.003534	0.005891	0.022419	0.036531	0.049602
unmod(H1_54_81)	H1_54_81 H1T.VGMSLVALKKALAAAGYDVEKNNSR	0	0.003333	0	0.00042	0	0.002814
KGNYAER(H2A1_36_42)	H2A1_36_42 unmod	0.999996	1	0.999988	0.999996	0.999993	0.999998
KGNYAER(H2A1_36_42)	H2A1_36_42 K36ac	4e-06	0	1.2e-05	4e-06	7e-06	2e-06
KGNYSER(H2A3_36_42)	H2A3_36_42 unmod	0.999985	0.999846	0.999982	0.999946	0.999981	0.999973
KGNYSER(H2A3_36_42)	H2A3_36_42 K36ac	1.5e-05	0.000154	1.8e-05	5.4e-05	1.9e-05	2.7e-05
KGHYAER(H2AX_36_42)	H2AX_36_42 unmod	0.999899	0.999944	1	0.999887	0.998763	0.998761
KGHYAER(H2AX_36_42)	H2AX_36_42 K36ac	0.000101	5.6e-05	0	0.000113	0.001237	0.001239
GKQGGKAR(H2A1_4_11)	H2A1_4_11 unmod	0.994779	0.991348	0.991676	0.965012	0.952724	0.954585
GKQGGKAR(H2A1_4_11)	H2A1_4_11 K5ac	0.004112	0.007554	0.004393	0.02944	0.04253	0.036157
GKQGGKAR(H2A1_4_11)	H2A1_4_11 K9ac	0.000846	0.000768	0.000787	0.002689	0.001806	0.004739
GKQGGKAR(H2A1_4_11)	H2A1_4_11 K5acK9ac	0.000109	0.000155	0.000164	0.000859	0.000997	0.001105
GKQGGKAR(H2A1_4_11)	H2A1_4_11 K9me1	0.000134	0.000111	0.000517	0.000149	0.000128	0.000229
GKQGGKAR(H2A1_4_11)	H2A1_4_11 K5me1	1.9e-05	6.4e-05	0.002463	0.001851	0.001815	0.003185
GKQGGKVR(H2AJ_4_11)	H2AJ_4_11 unmod	0.447262	0.901311	0.993732	0.341727	0.83047	0.987706
GKQGGKVR(H2AJ_4_11)	H2AJ_4_11 K5ac	0.00507	0.005942	0.000115	0.003206	0.006586	0.002763
GKQGGKVR(H2AJ_4_11)	H2AJ_4_11 K9ac	0.00507	0.005942	0.000115	0.003206	0.006586	0.002763
GKQGGKVR(H2AJ_4_11)	H2AJ_4_11 K5acK9ac	0.031226	0.044323	0.004767	0.266753	0.014285	0.004509
GKQGGKVR(H2AJ_4_11)	H2AJ_4_11 K9me1	0.505768	0.021485	0.001013	0.376909	0.140408	0.001962
GKQGGKVR(H2AJ_4_11)	H2AJ_4_11 K5me1	0.005605	0.020997	0.000258	0.008199	0.001667	0.000298
GKTGGKAR(H2AX_4_11)	H2AX_4_11 unmod	0.141554	0.125095	0.114271	0.133202	0.115353	0.141312
GKTGGKAR(H2AX_4_11)	H2AX_4_11 K5ac	6e-05	0.000966	0.009101	0.004404	0.007284	0.0088
GKTGGKAR(H2AX_4_11)	H2AX_4_11 K9ac	1.1e-05	0.000472	0.013444	0.000804	0.001829	0.002327
GKTGGKAR(H2AX_4_11)	H2AX_4_11 K5acK9ac	0.000238	0	2e-06	1.7e-05	0.000137	0.000181
GKTGGKAR(H2AX_4_11)	H2AX_4_11 K9me1	0.637106	0.66011	0.612936	0.633532	0.661326	0.601634
GKTGGKAR(H2AX_4_11)	H2AX_4_11 K5me1	0.22103	0.213358	0.250246	0.22804	0.214071	0.245746
SGRGKQGGKAR(H2A1_1_11)	H2A1_1_11 unmod	0.781882	0.115678	0.063784	0.75759	0.251606	0.096012
SGRGKQGGKAR(H2A1_1_11)	H2A1_1_11 S1ac	0.09198	0.24178	0.3788	0.131365	0.672597	0.056286
SGRGKQGGKAR(H2A1_1_11)	H2A1_1_11 K5ac	0.126138	0.642542	0.557416	0.111045	0.075797	0.847702
AGGKAGKDSGKAKAKAVSR(H2AV_1_19)	H2AV_1_19 unmod	0.997161	0.998437	0.997808	0.879094	0.880733	0.887161
AGGKAGKDSGKAKAKAVSR(H2AV_1_19)	H2AV_1_19 K4ac	0.001269	0.000558	0.000417	0.041557	0.050289	0.054988
AGGKAGKDSGKAKAKAVSR(H2AV_1_19)	H2AV_1_19 K7ac	0	0	0.000417	0.020411	0.020588	0.04708
AGGKAGKDSGKAKAKAVSR(H2AV_1_19)	H2AV_1_19 K11ac	0.000846	0.000446	0.000417	0.029853	0.024267	0
AGGKAGKDSGKAKAKAVSR(H2AV_1_19)	H2AV_1_19 K15ac	0	0	0.000417	0	0	0
AGGKAGKDSGKAKAKAVSR(H2AV_1_19)	H2AV_1_19 K4acK7ac	0.000121	9.3e-05	8.7e-05	0.004848	0.023984	0.001795
AGGKAGKDSGKAKAKAVSR(H2AV_1_19)	H2AV_1_19 K4acK11ac	0.000121	9.3e-05	8.7e-05	0.004848	0	0.001795
AGGKAGKDSGKAKAKAVSR(H2AV_1_19)	H2AV_1_19 K4acK15ac	0.000121	9.3e-05	8.7e-05	0.004848	0	0.001795
AGGKAGKDSGKAKAKAVSR(H2AV_1_19)	H2AV_1_19 K7acK11ac	0.000121	9.3e-05	8.7e-05	0.004848	0	0.001795
AGGKAGKDSGKAKAKAVSR(H2AV_1_19)	H2AV_1_19 K7acK15ac	0.000121	9.3e-05	8.7e-05	0.004848	0	0.001795
AGGKAGKDSGKAKAKAVSR(H2AV_1_19)	H2AV_1_19 K11acK15ac	0.000121	9.3e-05	8.7e-05	0.004848	0	0.001795
AGGKAGKDSGKAKAKAVSR(H2AV_1_19)	H2AV_1_19 K7acK11acK15ac	0	0	0	0	0	0
AGGKAGKDSGKAKAKAVSR(H2AV_1_19)	H2AV_1_19 K4acK11acK15ac	0	0	0	0	0	0
AGGKAGKDSGKAKAKAVSR(H2AV_1_19)	H2AV_1_19 K4acK7acK15ac	0	0	0	0	1e-06	0
AGGKAGKDSGKAKAKAVSR(H2AV_1_19)	H2AV_1_19 K4acK7acK11ac	0	0	0	0	0.000138	0
AGGKAGKDSGKAKAKAVSR(H2AV_1_19)	H2AV_1_19 K4acK7acK11acK15ac	0	0	0	0	0	0
AGGKAGKDSGKAKTKAVSR(H2AZ_1_19)	H2AZ_1_19 unmod	0.93542	0.928752	0.929849	0.848432	0.834753	0.846335
AGGKAGKDSGKAKTKAVSR(H2AZ_1_19)	H2AZ_1_19 K4ac	0.032819	0.032223	0.03498	0.040386	0.043223	0.039706
AGGKAGKDSGKAKTKAVSR(H2AZ_1_19)	H2AZ_1_19 K7ac	0	0.025121	0.034926	0.050213	0.0605	0.072664
AGGKAGKDSGKAKTKAVSR(H2AZ_1_19)	H2AZ_1_19 K11ac	0.031595	0.013258	0	0.040079	0.041803	0.020233
AGGKAGKDSGKAKTKAVSR(H2AZ_1_19)	H2AZ_1_19 K15ac	0	0.000418	0	0.002217	0.001735	0.004511
AGGKAGKDSGKAKTKAVSR(H2AZ_1_19)	H2AZ_1_19 K4acK7ac	0	0	0	0	0.007889	0.001922
AGGKAGKDSGKAKTKAVSR(H2AZ_1_19)	H2AZ_1_19 K4acK11ac	0	0	0	0.00324	0.000821	0.001922
AGGKAGKDSGKAKTKAVSR(H2AZ_1_19)	H2AZ_1_19 K4acK15ac	0	0	0	0	0	0.001922
AGGKAGKDSGKAKTKAVSR(H2AZ_1_19)	H2AZ_1_19 K7acK11ac	0	0	0	0.010394	0.004224	0.001922
AGGKAGKDSGKAKTKAVSR(H2AZ_1_19)	H2AZ_1_19 K7acK15ac	0	0	0	0	0	0.001922
AGGKAGKDSGKAKTKAVSR(H2AZ_1_19)	H2AZ_1_19 K11acK15ac	0	0	0	0.000342	0.001342	0.001922
AGGKAGKDSGKAKTKAVSR(H2AZ_1_19)	H2AZ_1_19 K7acK11acK15ac	4.1e-05	5.7e-05	4.3e-05	0	0	0
AGGKAGKDSGKAKTKAVSR(H2AZ_1_19)	H2AZ_1_19 K4acK11acK15ac	4.1e-05	5.7e-05	4.3e-05	0	0	0
AGGKAGKDSGKAKTKAVSR(H2AZ_1_19)	H2AZ_1_19 K4acK7acK15ac	4.1e-05	5.7e-05	4.3e-05	0.00032	3.7e-05	4.3e-05
AGGKAGKDSGKAKTKAVSR(H2AZ_1_19)	H2AZ_1_19 K4acK7acK11ac	4.1e-05	5.7e-05	4.3e-05	0.004377	0.003674	0.004219
AGGKAGKDSGKAKTKAVSR(H2AZ_1_19)	H2AZ_1_19 K4acK7acK11acK15ac	0	0	7.1e-05	0	0	0.00076
AKAKTR(H2A1_12_17)	H2A1_12_17 unmod	0.654286	0.617335	0.601077	0.585164	0.58105	0.544571
AKAKTR(H2A1_12_17)	H2A1_12_17 K13ac	0.000225	0.000163	0.000252	0.00022	0.00024	0.000252
AKAKTR(H2A1_12_17)	H2A1_12_17 K15ac	0.345178	0.380601	0.398244	0.413444	0.418437	0.454582
AKAKTR(H2A1_12_17)	H2A1_12_17 K13acK15ac	0.000308	0.001899	0.000426	0.001168	0.000223	0.000541
AKAKTR(H2A1_12_17)	H2A1_12_17 K15me1	1e-06	1e-06	1e-06	2e-06	2.5e-05	2.7e-05
AKAKTR(H2A1_12_17)	H2A1_12_17 K13me1	1e-06	1e-06	1e-06	2e-06	2.5e-05	2.7e-05
AKAKSR(H2A3_12_17)	H2A3_12_17 unmod	0.345279	0.380587	0.398267	0.413675	0.418588	0.45464
AKAKSR(H2A3_12_17)	H2A3_12_17 K13ac	3.1e-05	0.000239	4.2e-05	0.000115	3e-05	7e-05
AKAKSR(H2A3_12_17)	H2A3_12_17 K15ac	0.00027	0.001616	0.000378	0.001004	0.000193	0.000471
AKAKSR(H2A3_12_17)	H2A3_12_17 K13acK15ac	0.000369	0.000508	0.000582	2.6e-05	0.000263	0.00048
AKAKSR(H2A3_12_17)	H2A3_12_17 K15me1	0.654039	0.617049	0.600732	0.58518	0.580902	0.544329
AKAKSR(H2A3_12_17)	H2A3_12_17 K13me1	1.1e-05	0	0	0	2.5e-05	1e-05
DNKKTR(H2A1_72_77)	H2A1_72_77 unmod	0.999962	0.999842	0.999863	0.999985	0.999812	0.999834
DNKKTR(H2A1_72_77)	H2A1_72_77 K74ac	3.8e-05	0.000158	0.000137	1.5e-05	0.000188	0.000166
HLQLAIR(H2A_82_88)	H2A_82_88 unmod	1	1	1	1	1	1
unmod(H2A_1_88)	H2A_1_88 H2A14s.HLQLAIR	0.902772	0.912077	0.885674	0.884304	0.839735	0.858597
unmod(H2A_1_88)	H2A_1_88 H2AZ.AGGKAGKDSGKAKTKAVSR	0.037612	0.042328	0.048199	0.059148	0.09698	0.078998
unmod(H2A_1_88)	H2A_1_88 H2AY.SAKAGVIFPVGR	0.002343	0.003209	0.006914	0.007202	0.007787	0.017493
unmod(H2A_1_88)	H2A_1_88 H2AX.GKTGGKAR	0.057272	0.042386	0.059213	0.049346	0.055498	0.044911
unmod(H2B_1_29)	H2B_1_29 1C.PEPAKSAPAPKKGSKKAVTKAQKKDGKKR	0.589459	0.611595	0.616773	0.52932	0.524333	0.543804
unmod(H2B_1_29)	H2B_1_29 1H.PDPAKSAPAPKKGSKKAVTKAQKKDGKKR	0.181148	0.176372	0.171794	0.177167	0.191298	0.176885
unmod(H2B_1_29)	H2B_1_29 2F.PDPAKSAPAPKKGSKKAVTKVQKKDGKKR	0.069282	0.065034	0.053838	0.093258	0.088316	0.085839
unmod(H2B_1_29)	H2B_1_29 1B.PEPSKSAPAPKKGSKKAITKAQKKDGKKR	0.0002	1.7e-05	0	0.000859	4.2e-05	0.000338
unmod(H2B_1_29)	H2B_1_29 1N.PEPSKSAPAPKKGSKKAVTKAQKKDGKKR	0.026831	0.028962	0.029868	0.037541	0.037457	0.037878
unmod(H2B_1_29)	H2B_1_29 1D.PEPTKSAPAPKKGSKKAVTKAQKKDGKKR	0.087293	0.086556	0.094117	0.135222	0.134674	0.134518
unmod(H2B_1_29)	H2B_1_29 1M.PEPVKSAPVPKKGSKKAINKAQKKDGKKR	0.018128	0.012074	0.01192	0.006062	0.005364	0.003666
unmod(H2B_1_29)	H2B_1_29 1L.PELAKSAPAPKKGSKKAVTKAQKKDGKKR	0.027659	0.01939	0.021691	0.020571	0.018518	0.017072

## Sheet: PTMs_Apicidin
PTM	SW1116_C	SW1116_1UM_AMP	SW1116_10UM_AMP	DLD1_C	DLD1_1UM_AMP	DLD1_10UM_AMP
H3K4me1	0.020673	0.086423	0.097973	0.077528	0.115707	0.372943
H3K4me2	0	4e-06	7e-06	1e-06	0	2e-06
H3K4me3	0	0	0	0	0	0
H3K4ac	3.8e-05	0.000715	0.002681	0.000376	0.000871	0.002627
H3K9me1	0.268327	0.309193	0.236958	0.235619	0.21647	0.205702
H3K9me2	0.249292	0.194193	0.173868	0.247993	0.226312	0.205563
H3K9me3	0.098917	0.07504	0.058547	0.181822	0.176116	0.117894
H3K9ac	0.016116	0.068878	0.243292	0.016585	0.04764	0.192474
H3S10ph	0	0	0	0	0	0
H3K14ac	0.16392	0.474404	0.86939	0.29987	0.37383	0.799166
H3K18me1	0.000726	0.000493	0.000184	0.000687	0.000606	0.000469
H3K18ac	0.014436	0.081236	0.270441	0.036998	0.08512	0.448868
H3K23me1	0.000882	0.001	0.000184	0.000587	0.000502	0.000569
H3K23ac	0.229665	0.499297	0.843783	0.223293	0.248676	0.701558
H31K27me1	0.142471	0.122143	0.076567	0.222192	0.184103	0.112961
H31K27me2	0.487472	0.384557	0.498477	0.504732	0.504021	0.555369
H31K27me3	0.255147	0.386849	0.390412	0.142964	0.193887	0.283289
H31K27ac	1.5e-05	0.000811	0.002295	0.000416	0.00094	0.002548
H31K36me1	0.139215	0.166877	0.153995	0.170768	0.179026	0.190621
H31K36me2	0.183263	0.173412	0.14306	0.388844	0.356407	0.362444
H31K36me3	0.096498	0.09792	0.030977	0.071286	0.068729	0.037331
H33K27me1	0.211734	0.199997	0.17945	0.285719	0.23966	0.180789
H33K27me2	0.395428	0.322156	0.364282	0.435486	0.341516	0.398657
H33K27me3	0.206028	0.325268	0.327682	0.11094	0.183609	0.189224
H33K27ac	0.003064	0.00301	0.020043	6.4e-05	0.004735	0.102
H33K36me1	0.125516	0.198524	0.15799	0.188749	0.203102	0.236504
H33K36me2	0.25747	0.237031	0.191767	0.568201	0.457411	0.370282
H33K36me3	0.166236	0.103635	0.065588	0.110144	0.11583	0.03965
H3K56me1	0.000341	0.000171	4.3e-05	4.8e-05	0.000154	6.4e-05
H3K56me2	0.009036	0.001278	0.013037	0.000811	0.001541	0.021291
H3K56me3	1.3e-05	0.000287	4.2e-05	0.000242	0.000553	6.1e-05
H3K56ac	4.2e-05	1.5e-05	1.6e-05	0.000248	2.8e-05	3.2e-05
H3K79me1	0.076083	0.097181	0.095607	0.084718	0.083731	0.124568
H3K79me2	0.017575	0.02625	0.023777	0.014978	0.023227	0.033252
H3K79me3	9e-06	1.3e-05	0	2.2e-05	9e-06	1.5e-05
H3K79ac	0.000104	0.000856	0.000116	0.000222	1.9e-05	9e-06
H3K122ac	2.7e-05	0.000267	3.1e-05	0.001969	0.000937	0.00212
H4K5ac	0.030973	0.248517	0.619565	0.056118	0.120248	0.592435
H4K8ac	0.046624	0.335988	0.615371	0.068766	0.173211	0.664857
H4K12ac	0.081321	0.519978	0.885192	0.168761	0.351985	0.811362
H4K16ac	0.172267	0.644149	0.921351	0.360458	0.588537	0.866321
H4K20me1	0.23004	0.204456	0.17096	0.132224	0.162743	0.096915
H4K20me2	0.674999	0.699521	0.799981	0.784088	0.761313	0.862024
H4K20me3	0.005879	0.020215	0.023341	0.017201	0.024789	0.038885
H4K20ac	1e-06	2e-06	2e-06	8.4e-05	5e-05	0.000167
H4K44ac	0	1e-05	1e-05	0.000781	0.00124	0.000526
H12	0.046574	0.037407	0.048892	0.087624	0.062432	0.041818
H13	0.321943	0.409359	0.205604	0.121083	0.07685	0.020616
H14	0.631483	0.553233	0.745504	0.594132	0.713437	0.726326
H15	0	0	0	0.197161	0.147282	0.21124
H11	0.767917	0.632495	0.450767	0.106223	0.547424	0.934515
H1v234	0.226718	0.355889	0.54827	0.870938	0.182381	0.058355
H15_2	0.005365	0	0	0.022419	0.264227	0.004648
H1T	0	0.011616	0.000963	0.00042	0.005968	0.002482
H2A1K36ac	4e-06	0	0	4e-06	1.1e-05	0
H2A3K36ac	1.5e-05	0	0.001908	5.4e-05	0.000104	9.2e-05
H2AXK36ac	0.000101	0.000101	6e-05	0.000113	0.00221	0.000125
H2A1K5ac	0.004221	0.090155	0.368369	0.030299	0.088969	0.434512
H2A1K9ac	0.000955	0.00859	0.06025	0.003548	0.00708	0.138464
H2A1K5me1	1.9e-05	0.005088	0.014293	0.001851	0.002674	0.027681
H2A1K9me1	0.000134	0.000389	0.00022	0.000149	0.000305	0.000363
H2AJK5ac	0.036296	0.000429	0.001057	0.269959	0.291037	0.001103
H2AJK9ac	0.036296	0.000429	0.001057	0.269959	0.291037	0.001103
H2AJK5me1	0.005605	0.000136	0.000163	0.008199	0.009756	0.000341
H2AJK9me1	0.505768	0.010751	0.001294	0.376909	0.130734	0.001722
H2AXK5ac	0.000298	0.015323	0.067495	0.004421	0.018518	0.074687
H2AXK9ac	0.000249	0.006237	0.024963	0.000821	0.006196	0.045579
H2AXK5me1	0.22103	0.238817	0.218101	0.22804	0.245052	0.238426
H2AXK9me1	0.637106	0.628038	0.607247	0.633532	0.598522	0.606755
H2AVK4ac	0.001632	0.285645	0.570217	0.056101	0.19372	0.641226
H2AVK7ac	0.000363	0.2689	0.463748	0.034955	0.182666	0.583162
H2AVK11ac	0.001209	0.161674	0.204561	0.044397	0.102688	0.306067
H2AVK15ac	0.000363	0.029985	0.030119	0.014544	0.008418	0.089914
H2AZK4ac	0.032942	0.348235	0.585602	0.048323	0.154958	0.719855
H2AZK7ac	0.000123	0.331923	0.627093	0.065304	0.180505	0.69119
H2AZK11ac	0.031718	0.235077	0.425857	0.058432	0.15154	0.511684
H2AZK15ac	0.000123	0.016448	0.04039	0.002879	0.015102	0.02903
H2A1K13ac	0.000533	0.001555	0.002285	0.001388	0.00177	0.001972
H2A1K15ac	0.345486	0.404061	0.43226	0.414612	0.431254	0.473037
H2A1K13me1	1e-06	0	1e-06	2e-06	1e-06	1e-06
H2A1K15me1	1e-06	0	1e-06	2e-06	1e-06	1e-06
H2A3K13ac	0.0004	0.000452	0.000844	0.000141	0.00025	0.000112
H2A3K15ac	0.000639	0.001597	0.002185	0.00103	0.000571	0.001434
H2A3K13me1	1.1e-05	0	1.3e-05	0	0	0
H2A3K15me1	0.654039	0.595495	0.56717	0.58518	0.569414	0.52661
H2A14s.HLQLAIR	0.902772	0.942356	0.959341	0.884304	0.90039	0.970737
H2AZ.AGGKAGKDSGKAKTKAVSR	0.037612	0.021859	0.00795	0.059148	0.046024	0.008418
H2AY.SAKAGVIFPVGR	0.002343	0.002954	0.00334	0.007202	0.006395	0.006006
H2AX.GKTGGKAR	0.057272	0.032831	0.02937	0.049346	0.047192	0.014839
H2B1C	0.589459	0.57271	0.547089	0.52932	0.506608	0.397721
H2B1H	0.181148	0.171221	0.175337	0.177167	0.172317	0.213522
H2B1F	0.069282	0.072475	0.093601	0.093258	0.105914	0.101427
H2B1B	0.0002	0.002863	0.000336	0.000859	5e-05	0.018079
H2B1N	0.026831	0.042232	0.036168	0.037541	0.045611	0.130588
H2B1D	0.087293	0.09911	0.110998	0.135222	0.142357	0.11915
H2B1M	0.018128	0.012903	0.012621	0.006062	0.007534	0.005153
H2B1L	0.027659	0.026487	0.023851	0.020571	0.019608	0.014361

## Sheet: PTMs_UNC0642
PTM	SW1116_C	SW1116_1UM_UNCO6420	SW1116_10UM_UNCO6420	DLD1_C	DLD1_1UM_UNCO6420	DLD1_10UM_UNCO6420
H3K4me1	0.020673	0.011592	0.029126	0.077528	0.08932	0.08434
H3K4me2	0	0	0	1e-06	2.6e-05	4e-06
H3K4me3	0	0	0	0	1e-06	0
H3K4ac	3.8e-05	0.000251	0.000151	0.000376	0.000538	0.000429
H3K9me1	0.268327	0.237197	0.133214	0.235619	0.2092	0.156473
H3K9me2	0.249292	0.1887	0.089142	0.247993	0.197078	0.137439
H3K9me3	0.098917	0.07946	0.093842	0.181822	0.168107	0.172501
H3K9ac	0.016116	0.01758	0.026127	0.016585	0.031737	0.035719
H3S10ph	0	0	0	0	0	0
H3K14ac	0.16392	0.193513	0.173593	0.29987	0.291573	0.292336
H3K18me1	0.000726	0.000543	0.000449	0.000687	0.000819	0.000881
H3K18ac	0.014436	0.050956	0.016603	0.036998	0.044945	0.052776
H3K23me1	0.000882	0.000744	0.000865	0.000587	0.000628	0.000698
H3K23ac	0.229665	0.217608	0.269849	0.223293	0.237116	0.237259
H31K27me1	0.142471	0.168886	0.158151	0.222192	0.242207	0.251987
H31K27me2	0.487472	0.479713	0.490926	0.504732	0.48469	0.482351
H31K27me3	0.255147	0.236306	0.243489	0.142964	0.143804	0.143044
H31K27ac	1.5e-05	0.000131	1e-05	0.000416	0.00042	0.000239
H31K36me1	0.139215	0.161453	0.160525	0.170768	0.16869	0.181618
H31K36me2	0.183263	0.196575	0.209802	0.388844	0.404127	0.39665
H31K36me3	0.096498	0.084893	0.081639	0.071286	0.069606	0.057238
H33K27me1	0.211734	0.249328	0.210925	0.285719	0.25409	0.264406
H33K27me2	0.395428	0.376126	0.370608	0.435486	0.407334	0.381182
H33K27me3	0.206028	0.196827	0.212345	0.11094	0.106232	0.118425
H33K27ac	0.003064	0.003719	8.2e-05	6.4e-05	0.000137	0.000187
H33K36me1	0.125516	0.179283	0.133351	0.188749	0.18474	0.230708
H33K36me2	0.25747	0.29429	0.290447	0.568201	0.548246	0.531277
H33K36me3	0.166236	0.141968	0.164464	0.110144	0.129937	0.102344
H3K56me1	0.000341	3.2e-05	0.000139	4.8e-05	8.8e-05	2.2e-05
H3K56me2	0.009036	0.00107	0.017946	0.000811	0.018837	0.001066
H3K56me3	1.3e-05	0.000168	0.003629	0.000242	0.000378	0.000416
H3K56ac	4.2e-05	1.5e-05	1.5e-05	0.000248	2.7e-05	2e-05
H3K79me1	0.076083	0.088678	0.09377	0.084718	0.081237	0.090679
H3K79me2	0.017575	0.024328	0.025892	0.014978	0.01547	0.012099
H3K79me3	9e-06	0	3.4e-05	2.2e-05	0.000107	4.2e-05
H3K79ac	0.000104	4e-06	0.000318	0.000222	2e-06	0.000308
H3K122ac	2.7e-05	4e-05	0.00016	0.001969	0.001828	0.001522
H4K5ac	0.030973	0.035953	0.036834	0.056118	0.061679	0.048695
H4K8ac	0.046624	0.043237	0.047092	0.068766	0.070238	0.081423
H4K12ac	0.081321	0.101459	0.098124	0.168761	0.259326	0.122947
H4K16ac	0.172267	0.180555	0.149981	0.360458	0.3068	0.440765
H4K20me1	0.23004	0.207869	0.225188	0.132224	0.171972	0.167646
H4K20me2	0.674999	0.69865	0.665157	0.784088	0.737544	0.748677
H4K20me3	0.005879	0.004946	0.005758	0.017201	0.018045	0.016296
H4K20ac	1e-06	1.4e-05	2.5e-05	8.4e-05	0.000174	0.000149
H4K44ac	0	0.000175	9e-06	0.000781	0.000993	0.002018
H12	0.046574	0.091627	0.077593	0.087624	0.101085	0.083837
H13	0.321943	0.287065	0.233733	0.121083	0.112522	0.149958
H14	0.631483	0.621308	0.688674	0.594132	0.576639	0.558318
H15	0	0	0	0.197161	0.209754	0.207887
H11	0.767917	0.164583	0.275393	0.106223	0.393431	0.189996
H1v234	0.226718	0.82855	0.718716	0.870938	0.570039	0.757588
H15_2	0.005365	0.003534	0.005891	0.022419	0.036531	0.049602
H1T	0	0.003333	0	0.00042	0	0.002814
H2A1K36ac	4e-06	0	1.2e-05	4e-06	7e-06	2e-06
H2A3K36ac	1.5e-05	0.000154	1.8e-05	5.4e-05	1.9e-05	2.7e-05
H2AXK36ac	0.000101	5.6e-05	0	0.000113	0.001237	0.001239
H2A1K5ac	0.004221	0.007709	0.004557	0.030299	0.043527	0.037262
H2A1K9ac	0.000955	0.000923	0.000951	0.003548	0.002803	0.005844
H2A1K5me1	1.9e-05	6.4e-05	0.002463	0.001851	0.001815	0.003185
H2A1K9me1	0.000134	0.000111	0.000517	0.000149	0.000128	0.000229
H2AJK5ac	0.036296	0.050265	0.004882	0.269959	0.020871	0.007272
H2AJK9ac	0.036296	0.050265	0.004882	0.269959	0.020871	0.007272
H2AJK5me1	0.005605	0.020997	0.000258	0.008199	0.001667	0.000298
H2AJK9me1	0.505768	0.021485	0.001013	0.376909	0.140408	0.001962
H2AXK5ac	0.000298	0.000966	0.009103	0.004421	0.007421	0.008981
H2AXK9ac	0.000249	0.000472	0.013446	0.000821	0.001966	0.002508
H2AXK5me1	0.22103	0.213358	0.250246	0.22804	0.214071	0.245746
H2AXK9me1	0.637106	0.66011	0.612936	0.633532	0.661326	0.601634
H2AVK4ac	0.001632	0.000837	0.000678	0.056101	0.074412	0.060373
H2AVK7ac	0.000363	0.000279	0.000678	0.034955	0.044711	0.052465
H2AVK11ac	0.001209	0.000725	0.000678	0.044397	0.024405	0.005385
H2AVK15ac	0.000363	0.000279	0.000678	0.014544	1e-06	0.005385
H2AZK4ac	0.032942	0.032394	0.03518	0.048323	0.055644	0.050494
H2AZK7ac	0.000123	0.025292	0.035126	0.065304	0.076324	0.083452
H2AZK11ac	0.031718	0.013429	0.0002	0.058432	0.051864	0.030978
H2AZK15ac	0.000123	0.000589	0.0002	0.002879	0.003114	0.01108
H2A1K13ac	0.000533	0.002062	0.000678	0.001388	0.000463	0.000793
H2A1K15ac	0.345486	0.3825	0.39867	0.414612	0.41866	0.455123
H2A1K13me1	1e-06	1e-06	1e-06	2e-06	2.5e-05	2.7e-05
H2A1K15me1	1e-06	1e-06	1e-06	2e-06	2.5e-05	2.7e-05
H2A3K13ac	0.0004	0.000747	0.000624	0.000141	0.000293	0.00055
H2A3K15ac	0.000639	0.002124	0.00096	0.00103	0.000456	0.000951
H2A3K13me1	1.1e-05	0	0	0	2.5e-05	1e-05
H2A3K15me1	0.654039	0.617049	0.600732	0.58518	0.580902	0.544329
H2A14s.HLQLAIR	0.902772	0.912077	0.885674	0.884304	0.839735	0.858597
H2AZ.AGGKAGKDSGKAKTKAVSR	0.037612	0.042328	0.048199	0.059148	0.09698	0.078998
H2AY.SAKAGVIFPVGR	0.002343	0.003209	0.006914	0.007202	0.007787	0.017493
H2AX.GKTGGKAR	0.057272	0.042386	0.059213	0.049346	0.055498	0.044911
H2B1C	0.589459	0.611595	0.616773	0.52932	0.524333	0.543804
H2B1H	0.181148	0.176372	0.171794	0.177167	0.191298	0.176885
H2B1F	0.069282	0.065034	0.053838	0.093258	0.088316	0.085839
H2B1B	0.0002	1.7e-05	0	0.000859	4.2e-05	0.000338
H2B1N	0.026831	0.028962	0.029868	0.037541	0.037457	0.037878
H2B1D	0.087293	0.086556	0.094117	0.135222	0.134674	0.134518
H2B1M	0.018128	0.012074	0.01192	0.006062	0.005364	0.003666
H2B1L	0.027659	0.01939	0.021691	0.020571	0.018518	0.017072
