# Supplementary material
Source: Research Square preprint supplement (doi:10.21203/rs.3.rs-9763213/v1)
Supplement: Supplementary file 6 [file 5f7ae24a52e0cf8aa3a69464.xlsx]

## Sheet: Peptides_EHMT2_HDAC7_KO
Peptide	Modification	SW1116_C1	SW1116_C2	SW1116_EHMT2_KO1	SW1116_EHMT2_KO2	SW1116_HDAC7_KO1	SW1116_HDAC7_KO2	DLD1_C1	DLD1_C2	DLD1_EHMT2_KO1	DLD1_EHMT2_KO2	DLD1_HDAC7_KO1	DLD1_HDAC7_KO2
TKQTAR(H3_3_8)	H3_3_8 unmod	0.991868	0.981641	0.982422	0.978869	0.982527	0.985563	0.946185	0.953303	0.94069	0.936296	0.954593	0.936385
TKQTAR(H3_3_8)	H3_3_8 K4me1	0.007945	0.018341	0.017556	0.020965	0.017466	0.014283	0.053805	0.046435	0.059087	0.063562	0.045201	0.06349
TKQTAR(H3_3_8)	H3_3_8 K4me2	3e-06	1e-06	4e-06	1e-06	1e-06	0	5e-06	8e-06	4e-06	3e-06	2e-06	3e-06
TKQTAR(H3_3_8)	H3_3_8 K4me3	0	0	0	0	0	0	0	0	0	0	0	0
TKQTAR(H3_3_8)	H3_3_8 K4ac	0.000184	1.6e-05	1.8e-05	0.000164	6e-06	0.000154	5e-06	0.000254	0.000219	0.000139	0.000204	0.000123
KSTGGKAPR(H3_9_17)	H3_9_17 unmod	0.31048	0.311168	0.527093	0.467517	0.347811	0.27827	0.285289	0.303087	0.399269	0.381641	0.291271	0.306848
KSTGGKAPR(H3_9_17)	H3_9_17 K9me1	0.183913	0.165459	0.13066	0.146959	0.148374	0.173931	0.151521	0.138123	0.109657	0.104815	0.153747	0.150259
KSTGGKAPR(H3_9_17)	H3_9_17 K9me2	0.243885	0.219413	0.100497	0.104831	0.218689	0.235054	0.197218	0.18295	0.104957	0.119995	0.196117	0.164871
KSTGGKAPR(H3_9_17)	H3_9_17 K9me3	0.07749	0.069714	0.062146	0.064826	0.066815	0.08067	0.134477	0.129289	0.161856	0.162144	0.115418	0.114522
KSTGGKAPR(H3_9_17)	H3_9_17 K9ac	0.01067	0.010462	0.012455	0.021774	0.009403	0.0154	0.011093	0.011677	0.017746	0.013159	0.015472	0.012964
KSTGGKAPR(H3_9_17)	H3_9_17 K14ac	0.06746	0.088504	0.110523	0.115289	0.078475	0.091992	0.077279	0.084045	0.122459	0.141507	0.085547	0.105447
KSTGGKAPR(H3_9_17)	H3_9_17 K9me1K14ac	0.043441	0.053869	0.032119	0.043299	0.053357	0.04824	0.058431	0.060977	0.036203	0.035919	0.061715	0.065016
KSTGGKAPR(H3_9_17)	H3_9_17 K9me2K14ac	0.048856	0.060691	0.015484	0.023395	0.061129	0.057046	0.056782	0.06326	0.029305	0.02582	0.057756	0.05002
KSTGGKAPR(H3_9_17)	H3_9_17 K9me3K14ac	0.011628	0.017339	0.006782	0.008712	0.013137	0.016241	0.025612	0.023177	0.014299	0.011215	0.019881	0.027397
KSTGGKAPR(H3_9_17)	H3_9_17 K9acK14ac	0.002176	0.003382	0.002241	0.003398	0.002811	0.003156	0.002298	0.003414	0.004249	0.003785	0.003077	0.002657
KQLATKAAR(H3_18_26)	H3_18_26 unmod	0.746765	0.704443	0.733022	0.759146	0.697945	0.761515	0.77561	0.803744	0.787309	0.789045	0.810174	0.823564
KQLATKAAR(H3_18_26)	H3_18_26 K23me1	0.000438	0.000767	0.000405	0.000793	0.000497	0.000675	0.000539	0.00064	0.000606	0.000894	0.000751	0.00065
KQLATKAAR(H3_18_26)	H3_18_26 K18me1	0.000379	0.000661	0.00034	0.000714	0.000411	0.000537	0.000648	0.000816	0.001098	0.001101	0.000784	0.000678
KQLATKAAR(H3_18_26)	H3_18_26 K18me1K23me1	1.3e-05	6.3e-05	1e-05	4e-06	6e-06	6.3e-05	1e-06	7e-06	5e-06	2e-06	1.8e-05	5.8e-05
KQLATKAAR(H3_18_26)	H3_18_26 K18ac	0.036032	0.037591	0.033386	0.044247	0.032574	0.03619	0.031578	0.068527	0.040744	0.025856	0.071985	0.052914
KQLATKAAR(H3_18_26)	H3_18_26 K23ac	0.214872	0.253191	0.230949	0.192377	0.265568	0.198625	0.185802	0.119248	0.164551	0.177856	0.109032	0.115862
KQLATKAAR(H3_18_26)	H3_18_26 K18acK23ac	0.0015	0.003284	0.001888	0.002719	0.002999	0.002395	0.005823	0.007019	0.005687	0.005246	0.007255	0.006274
KSAPATGGVKKPHR(H3_27_40)	H3_27_40 unmod	0.021003	0.044051	0.042436	0.067792	0.048353	0.067319	0.075063	0.088407	0.086651	0.100862	0.09553	0.114878
KSAPATGGVKKPHR(H3_27_40)	H3_27_40 K36me1	0.007374	0.017967	0.011859	0.026828	0.019412	0.023039	0.016018	0.033053	0.020676	0.018049	0.032647	0.031609
KSAPATGGVKKPHR(H3_27_40)	H3_27_40 K27me1	0.029757	0.06377	0.06373	0.101808	0.074175	0.103328	0.109118	0.123159	0.126642	0.121435	0.146768	0.151919
KSAPATGGVKKPHR(H3_27_40)	H3_27_40 K27me2	0.369597	0.44106	0.311582	0.392621	0.445947	0.396667	0.218755	0.322181	0.218331	0.188412	0.313705	0.174687
KSAPATGGVKKPHR(H3_27_40)	H3_27_40 K36me2	0.036913	0.082263	0.038345	0.074559	0.107985	0.090313	0.061243	0.080096	0.051125	0.043386	0.107145	0.060573
KSAPATGGVKKPHR(H3_27_40)	H3_27_40 K27me3	0.178292	0.242756	0.145346	0.167241	0.209525	0.178215	0.10307	0.094359	0.092388	0.069771	0.08114	0.052294
KSAPATGGVKKPHR(H3_27_40)	H3_27_40 K36me3	0.076398	0	0.080901	0.010109	0	0.010788	0.020776	2e-06	0.019292	0.033284	0	0.040698
KSAPATGGVKKPHR(H3_27_40)	H3_27_40 K27me2K36me1	0.088679	0	0.088371	0.017635	0	0.015705	0.026283	3e-06	0.022637	0.055815	0	0.078494
KSAPATGGVKKPHR(H3_27_40)	H3_27_40 K27me1K36me2	0.085959	0	0.10951	0.018945	0	0.017069	0.045827	8e-06	0.030488	0.138257	0	0.117081
KSAPATGGVKKPHR(H3_27_40)	H3_27_40 K27me1K36me1	0.011846	0.025064	0.016794	0.043467	0.029562	0.038064	0.040259	0.057704	0.044417	0.030709	0.066454	0.057055
KSAPATGGVKKPHR(H3_27_40)	H3_27_40 K27me3K36me1	0.022775	0.038066	0.023429	0.031227	0.032536	0.028431	0.048817	0.043123	0.039741	0.027748	0.03752	0.021707
KSAPATGGVKKPHR(H3_27_40)	H3_27_40 K27me1K36me3	0.0244	0	0.029533	0.007115	0	0.005681	0.007895	2e-06	0.007631	0.023706	0	0.017367
KSAPATGGVKKPHR(H3_27_40)	H3_27_40 K27me2K36me2	0.040316	0.03551	0.030772	0.03431	0.028049	0.023426	0.196362	0.141677	0.206423	0.131853	0.102824	0.07396
KSAPATGGVKKPHR(H3_27_40)	H3_27_40 K27me3K36me2	0.006674	0.0088	0.006783	0.006161	0.004412	0.001899	0.030051	0.016154	0.033287	0.016253	0.015697	0.007217
KSAPATGGVKKPHR(H3_27_40)	H3_27_40 K27ac	1.5e-05	0.000694	0.000609	0.000182	4.4e-05	5.7e-05	0.000464	7.3e-05	0.000271	0.000459	0.00057	0.000461
KSAPSTGGVKKPHR(H33_27_40)	H33_27_40 unmod	0.043298	0.108132	0.056959	0.119502	0.096314	0.128466	0.05546	0.053152	0.086244	0.075045	0.087659	0.13003
KSAPSTGGVKKPHR(H33_27_40)	H33_27_40 K36me1	0.001949	2.3e-05	0.002348	1.7e-05	0.006877	0.023054	0.03101	0.015112	0.043793	0.062048	0.01218	0.012348
KSAPSTGGVKKPHR(H33_27_40)	H33_27_40 K27me1	0.010479	0.033368	0.014394	0.033517	0.022495	0.026253	0.007729	0.010448	0.013322	0.010994	0.012835	0.007052
KSAPSTGGVKKPHR(H33_27_40)	H33_27_40 K27me2	0.283785	0.468066	0.217038	0.351028	0.406667	0.257093	0.095803	0.270224	0.097753	0.055745	0.270983	0.126036
KSAPSTGGVKKPHR(H33_27_40)	H33_27_40 K36me2	0.059477	0.093806	0.063288	0.09155	0.159125	0.135939	0.145129	0.261422	0.187525	0.111111	0.328824	0.189744
KSAPSTGGVKKPHR(H33_27_40)	H33_27_40 K27me3	0.141268	0.225478	0.131064	0.154491	0.190421	0.182663	0.026274	0.049114	0.02377	0.001355	0.018845	0.00773
KSAPSTGGVKKPHR(H33_27_40)	H33_27_40 K36me3	0.10204	2e-06	0.101761	0.023631	1e-06	0.033922	0.033683	7e-06	0.026492	0.052506	5e-06	0.071365
KSAPSTGGVKKPHR(H33_27_40)	H33_27_40 K27me2K36me1	0.0844	2e-06	0.113489	0.035502	2e-06	0.037417	0.027985	1.8e-05	0.062888	0.085093	5e-06	0.094433
KSAPSTGGVKKPHR(H33_27_40)	H33_27_40 K27me1K36me2	0.120404	2e-06	0.172472	0.038675	2e-06	0.041778	0.08056	6.5e-05	0.079081	0.225113	5e-06	0.217868
KSAPSTGGVKKPHR(H33_27_40)	H33_27_40 K27me1K36me1	0.017467	0.009931	0.023385	0.077236	0.071674	0.098541	0.059021	0.119397	0.084073	0.082951	0.098155	0.080305
KSAPSTGGVKKPHR(H33_27_40)	H33_27_40 K27me3K36me1	0.015243	0.006586	0.016674	0.003565	0.000295	0.002152	0.005165	0.000282	0.007333	0.01067	0.006663	2.3e-05
KSAPSTGGVKKPHR(H33_27_40)	H33_27_40 K27me1K36me3	0.06299	2e-06	0.071478	0.01395	1e-06	0.011589	0.018025	7e-06	0.022262	0.038177	5e-06	0.045762
KSAPSTGGVKKPHR(H33_27_40)	H33_27_40 K27me2K36me2	0.054723	0.045883	0.012764	0.056726	0.04355	0.021126	0.392045	0.193807	0.228158	0.164629	0.154582	0.017279
KSAPSTGGVKKPHR(H33_27_40)	H33_27_40 K27me3K36me2	0.002478	0.00872	0.002887	0.00061	0.002575	6e-06	0.02211	0.026945	0.037306	0.024565	0.009254	2.6e-05
KSAPSTGGVKKPHR(H33_27_40)	H33_27_40 K27ac	0	0	0	0	0	0	1e-06	0	0	0	2e-06	0
YRPGTVALR(H3_41_49)	H3_41_49 unmod	0.999992	0.999994	1	1	0.999997	1	0.999999	0.999953	0.999934	0.999996	0.999989	0.99999
YRPGTVALR(H3_41_49)	H3_41_49 Y41ph	8e-06	6e-06	0	0	3e-06	0	1e-06	4.7e-05	6.6e-05	4e-06	1.1e-05	1e-05
YQKSTELLIR(H3_54_63)	H3_54_63 unmod	0.999243	0.969069	0.992992	0.995819	0.958936	0.999274	0.988316	0.992355	0.996061	0.997293	0.976675	0.993549
YQKSTELLIR(H3_54_63)	H3_54_63 K56me1	0.000165	0.000271	2.2e-05	0	3.6e-05	7.5e-05	7e-06	6.2e-05	0.000296	7.5e-05	8.2e-05	6.4e-05
YQKSTELLIR(H3_54_63)	H3_54_63 K56me2	0.000571	0.030659	0.006985	0.004175	0.040995	0.000641	0.011615	0.007583	0.003634	0.002611	0.023243	0.006387
YQKSTELLIR(H3_54_63)	H3_54_63 K56me3	2.1e-05	0	0	0	6e-06	0	8e-06	0	0	0	0	0
YQKSTELLIR(H3_54_63)	H3_54_63 K56ac	0	0	0	6e-06	2.8e-05	1.1e-05	5.4e-05	0	9e-06	2.1e-05	0	0
EIAQDFKTDLR(H3_73_83)	H3_73_83 unmod	0.958187	0.954658	0.941646	0.913492	0.941492	0.908554	0.939446	0.938064	0.915723	0.899376	0.936346	0.930836
EIAQDFKTDLR(H3_73_83)	H3_73_83 K79me1	0.028089	0.014982	0.042583	0.067563	0.038853	0.070894	0.049691	0.052763	0.071037	0.086671	0.053859	0.057602
EIAQDFKTDLR(H3_73_83)	H3_73_83 K79me2	0.013631	0.030097	0.015579	0.018716	0.019643	0.020532	0.010783	0.009139	0.013029	0.013725	0.009757	0.011515
EIAQDFKTDLR(H3_73_83)	H3_73_83 K79me3	3e-05	0	0	4e-06	0	0	9e-06	0	9e-06	0	0	0
EIAQDFKTDLR(H3_73_83)	H3_73_83 K79ac	6.4e-05	0.000263	0.000191	0.000224	1.2e-05	2.1e-05	7.1e-05	3.5e-05	0.000202	0.000228	3.7e-05	4.7e-05
VTIMPKDIQLAR(H3_117_128)	H3_117_128 unmod	0.999953	0.999751	0.999913	0.999956	0.999968	0.999902	0.999226	0.998882	0.998892	0.998457	0.998525	0.998486
VTIMPKDIQLAR(H3_117_128)	H3_117_128 K122ac	4.7e-05	0.000249	8.7e-05	4.4e-05	3.2e-05	9.8e-05	0.000774	0.001118	0.001108	0.001543	0.001475	0.001514
GKGGKGLGKGGAKR(H4_4_17)	H4_4_17 unmod	0.759023	0.706277	0.735985	0.727916	0.691323	0.722131	0.533399	0.548488	0.560221	0.560353	0.55035	0.580704
GKGGKGLGKGGAKR(H4_4_17)	H4_4_17 K5ac	0.023343	0.036126	0.025486	0.03053	0.033154	0.03441	0.029135	0.028295	0.028421	0.028204	0.027591	0.030094
GKGGKGLGKGGAKR(H4_4_17)	H4_4_17 K8ac	0.035419	0.037269	0.039503	0.03565	0.038369	0.044346	0.030559	0.032181	0.041712	0.04577	0.030129	0.051596
GKGGKGLGKGGAKR(H4_4_17)	H4_4_17 K12ac	0.056062	0.074931	0.07548	0.069235	0.049448	0.054514	0.074471	0.081404	0.062198	0.061212	0.058166	0.06324
GKGGKGLGKGGAKR(H4_4_17)	H4_4_17 K16ac	0.095835	0.097494	0.089386	0.094665	0.136607	0.100596	0.263353	0.233246	0.239842	0.24135	0.252988	0.197135
GKGGKGLGKGGAKR(H4_4_17)	H4_4_17 K5acK8ac	0.000742	0.000953	0.000598	0.000791	0.000697	0.00085	0.001236	0.000849	0.001076	0.001181	0.001045	0.001221
GKGGKGLGKGGAKR(H4_4_17)	H4_4_17 K5acK12ac	0.00301	0.004978	0.003364	0.004098	0.005924	0.003854	0.003729	0.0044	0.002674	0.00235	0.004285	0.004159
GKGGKGLGKGGAKR(H4_4_17)	H4_4_17 K5acK16ac	0.001047	0.001716	0.000938	0.000776	0.000776	0.001717	0.003025	0.004684	0.003804	0.003472	0.006983	0.00404
GKGGKGLGKGGAKR(H4_4_17)	H4_4_17 K8acK12ac	0	0	0	0	0	0	0	0	0	0	0	0
GKGGKGLGKGGAKR(H4_4_17)	H4_4_17 K8acK16ac	0.006415	0.014006	0.007964	0.012483	0.015168	0.009938	0.009529	0.017785	0.020031	0.015335	0.015112	0.018138
GKGGKGLGKGGAKR(H4_4_17)	H4_4_17 K12acK16ac	0.01341	0.016943	0.015362	0.016049	0.019156	0.019299	0.041819	0.035366	0.030859	0.031623	0.038592	0.037428
GKGGKGLGKGGAKR(H4_4_17)	H4_4_17 K5acK8acK12ac	0.000617	0.000856	0.000418	0.001508	0.001151	0.001103	0.000425	0.000734	0.000398	0.000683	0.00099	0.000831
GKGGKGLGKGGAKR(H4_4_17)	H4_4_17 K5acK8acK16ac	0.001354	0.001352	0.000438	0.001008	0.001458	0.001471	0.001742	0.001769	0.001121	0.001572	0.002951	0.001895
GKGGKGLGKGGAKR(H4_4_17)	H4_4_17 K5acK12acK16ac	0.000935	0.001825	0.001048	0.001037	0.001834	0.001822	0.001499	0.002709	0.001402	0.001319	0.003837	0.002782
GKGGKGLGKGGAKR(H4_4_17)	H4_4_17 K8acK12acK16ac	0.002098	0.00376	0.003148	0.003327	0.003846	0.002721	0.005583	0.007129	0.005548	0.005141	0.006098	0.00575
GKGGKGLGKGGAKR(H4_4_17)	H4_4_17 K5acK8acK12acK16ac	0.00069	0.001512	0.00088	0.000928	0.001087	0.00123	0.000497	0.000962	0.000693	0.000437	0.000882	0.000986
KVLR(H4_20_23)	H4_20_23 unmod	0.102466	0.105191	0.117618	0.129759	0.107993	0.129057	0.061851	0.067566	0.061403	0.052633	0.088977	0.090454
KVLR(H4_20_23)	H4_20_23 K20me1	0.172881	0.166281	0.211058	0.178855	0.160692	0.177364	0.096123	0.09509	0.117476	0.109364	0.116804	0.104165
KVLR(H4_20_23)	H4_20_23 K20me2	0.721144	0.725226	0.668015	0.687802	0.727729	0.689622	0.827718	0.827222	0.809717	0.826943	0.783489	0.796501
KVLR(H4_20_23)	H4_20_23 K20me3	0.003509	0.003302	0.003309	0.003579	0.003585	0.003957	0.01425	0.01009	0.011396	0.011005	0.010726	0.008809
KVLR(H4_20_23)	H4_20_23 K20ac	0	0	0	5e-06	2e-06	1e-06	5.8e-05	3.1e-05	8e-06	5.3e-05	5e-06	7.1e-05
DNIQGITKPAIR(H4_24_35)	H4_24_35 unmod	1	1	1	1	1	1	1	1	1	1	1	1
RGGVKR(H4_40_45)	H4_40_45 unmod	0.999995	0.999982	0.999983	0.999995	0.999994	0.999992	0.999225	0.999924	0.999473	0.999172	0.999733	0.999793
RGGVKR(H4_40_45)	H4_40_45 K44ac	5e-06	1.8e-05	1.7e-05	5e-06	6e-06	8e-06	0.000775	7.6e-05	0.000527	0.000828	0.000267	0.000207
KTVTAMDVVYALKR(H4_79_92)	H4_79_92 unmod	1	1	1	1	1	1	1	1	1	1	1	1
unmod(H1_1_35)	H1_1_35 H12.SETAPAAPAAAPPAEKAPVKKKAAKKAGGTPR	0.095296	0.08046	0.097053	0.114166	0.03622	0.059675	0.105466	0.079677	0.091736	0.104126	0.105484	0.08803
unmod(H1_1_35)	H1_1_35 H13.SETAPLAPTIPAPAEKTPVKKKAKKAGATAGKR	0.311265	0.164044	0.349735	0.29935	0.198769	0.304367	0.141963	0.151719	0.135529	0.163122	0.098927	0.09843
unmod(H1_1_35)	H1_1_35 H14.SETAPAAPAAPAPAEKTPVKKKAR	0.593439	0.755496	0.553211	0.586484	0.765012	0.635958	0.530101	0.609654	0.598652	0.529031	0.644494	0.68861
unmod(H1_1_35)	H1_1_35 H15.SETAPAETATPAPVEKSPAKKKATKKAAGAGAAKR	0	0	0	0	0	0	0.222471	0.15895	0.174084	0.203722	0.151094	0.124929
unmod(H1_54_81)	H1_54_81 H11.GGVSLAALKKALAAAGYDVEKNNSR	0.246934	0.401721	0.265117	0.184114	0.393291	0.252335	0.136826	0.043027	0.085317	0.081091	0.241341	0.125529
unmod(H1_54_81)	H1_54_81 H1v234.SGVSLAALKKALAAAGYDVEKNNSR	0.75305	0.598146	0.73348	0.815364	0.600589	0.746474	0.862123	0.944568	0.890031	0.916722	0.717046	0.872709
unmod(H1_54_81)	H1_54_81 H15.NGLSLAALKKALAAGGYDVEKNNSR	1.6e-05	0.000131	5.4e-05	0.00052	0.004881	0.000781	0.001052	0.012403	0.02293	0.001917	0.039995	0.001759
unmod(H1_54_81)	H1_54_81 H1T.VGMSLVALKKALAAAGYDVEKNNSR	0	2e-06	0.001349	3e-06	0.00124	0.00041	0	2e-06	0.001722	0.00027	0.001617	3e-06
KGNYAER(H2A1_36_42)	H2A1_36_42 unmod	0.999985	0.999995	0.999999	0.999999	1	0.999987	0.999998	0.999972	0.999994	0.999995	0.999992	1
KGNYAER(H2A1_36_42)	H2A1_36_42 K36ac	1.5e-05	5e-06	1e-06	1e-06	0	1.3e-05	2e-06	2.8e-05	6e-06	5e-06	8e-06	0
KGNYSER(H2A3_36_42)	H2A3_36_42 unmod	0.999858	0.999959	0.999829	0.99965	0.999987	0.999917	0.999977	0.99951	0.999999	0.999746	0.99882	0.999588
KGNYSER(H2A3_36_42)	H2A3_36_42 K36ac	0.000142	4.1e-05	0.000171	0.00035	1.3e-05	8.3e-05	2.3e-05	0.00049	1e-06	0.000254	0.00118	0.000412
KGHYAER(H2AX_36_42)	H2AX_36_42 unmod	0.999774	0.999238	0.999996	0.99993	0.999787	0.999999	0.99972	0.999535	0.999669	0.999656	0.993974	0.999248
KGHYAER(H2AX_36_42)	H2AX_36_42 K36ac	0.000226	0.000762	4e-06	7e-05	0.000213	1e-06	0.00028	0.000465	0.000331	0.000344	0.006026	0.000752
GKQGGKAR(H2A1_4_11)	H2A1_4_11 unmod	0.990492	0.981407	0.99003	0.983914	0.981208	0.980276	0.962291	0.95149	0.960001	0.954395	0.951345	0.940855
GKQGGKAR(H2A1_4_11)	H2A1_4_11 K5ac	0.009097	0.01621	0.008568	0.014524	0.016417	0.017877	0.032437	0.042245	0.032182	0.038874	0.04029	0.050526
GKQGGKAR(H2A1_4_11)	H2A1_4_11 K9ac	0.000115	0.001386	0.001188	0.001047	0.001236	0.001032	0.003822	0.004845	0.00657	0.005265	0.006948	0.00695
GKQGGKAR(H2A1_4_11)	H2A1_4_11 K5acK9ac	0.000154	0.000484	0.000167	0.000214	0.000329	0.000578	0.000509	0.000899	0.000794	0.000716	0.000892	0.000912
GKQGGKAR(H2A1_4_11)	H2A1_4_11 K9me1	0.000128	0.000189	1.8e-05	0.000166	0.000232	2.3e-05	0.00017	0.000228	0.000166	0.000198	0.00012	0.00023
GKQGGKAR(H2A1_4_11)	H2A1_4_11 K5me1	1.5e-05	0.000324	3e-05	0.000135	0.000578	0.000214	0.000771	0.000292	0.000287	0.000553	0.000405	0.000527
GKQGGKVR(H2AJ_4_11)	H2AJ_4_11 unmod	0.998858	0.050639	0.959374	0.914917	0.001737	0.996326	0.967702	0.00693	0.989888	0.993132	0.014432	0.994443
GKQGGKVR(H2AJ_4_11)	H2AJ_4_11 K5ac	1.6e-05	6e-06	2.5e-05	0.002265	0.00011	8e-05	0.004198	0.000263	0.000193	0.00031	0.000538	0.000409
GKQGGKVR(H2AJ_4_11)	H2AJ_4_11 K9ac	1.7e-05	7e-06	4e-05	0.001769	0.000116	8.2e-05	0.004198	0.000263	0.000193	0.00031	0.000538	0.000409
GKQGGKVR(H2AJ_4_11)	H2AJ_4_11 K5acK9ac	0.000652	0.920439	0.038402	0.062338	0.984468	0.002782	0.008468	0.989699	0.000684	0.003976	0.98195	0.002591
GKQGGKVR(H2AJ_4_11)	H2AJ_4_11 K9me1	0.000224	0	0.001124	0.008321	0	0.000265	0.015435	0.002846	0.006849	0.001951	2e-06	0.001775
GKQGGKVR(H2AJ_4_11)	H2AJ_4_11 K5me1	0.000232	0.028909	0.001036	0.010389	0.013569	0.000465	0	0	0.002192	0.000322	0.002541	0.000373
GKTGGKAR(H2AX_4_11)	H2AX_4_11 unmod	0.077158	0.126848	0.095579	0.128864	0.131118	0.134692	0.168646	0.140885	0.127869	0.115787	0.122038	0.111084
GKTGGKAR(H2AX_4_11)	H2AX_4_11 K5ac	0.00019	0.000416	5e-06	0	0.000208	0	0.000245	3e-06	0.000638	0.000625	0.001138	0.004054
GKTGGKAR(H2AX_4_11)	H2AX_4_11 K9ac	0.012389	0.006167	7.2e-05	0.008206	0.023364	0.007684	0.000114	0.008662	0.000332	0.000316	0.002194	0.002213
GKTGGKAR(H2AX_4_11)	H2AX_4_11 K5acK9ac	7e-06	0.00033	2.2e-05	2.9e-05	3.8e-05	2.8e-05	0.001559	0.003484	5.5e-05	0.00042	0.00032	0.000338
GKTGGKAR(H2AX_4_11)	H2AX_4_11 K9me1	0.694958	0.624468	0.697246	0.626252	0.609892	0.629526	0.591306	0.624671	0.649754	0.636184	0.652759	0.625174
GKTGGKAR(H2AX_4_11)	H2AX_4_11 K5me1	0.215298	0.241771	0.207076	0.236649	0.235381	0.22807	0.23813	0.222296	0.221351	0.246669	0.221551	0.257136
SGRGKQGGKAR(H2A1_1_11)	H2A1_1_11 unmod	0.957649	0.96741	0.86828	0.992654	0.934797	0.542372	0.975751	0.998034	0.475812	0.514799	0.987806	0.916142
SGRGKQGGKAR(H2A1_1_11)	H2A1_1_11 S1ac	2e-06	0	6e-06	0	1e-06	-1e-06	6e-06	0	-2e-06	-3e-06	2.3e-05	-9e-06
SGRGKQGGKAR(H2A1_1_11)	H2A1_1_11 K5ac	0.042349	0.03259	0.131714	0.007346	0.065202	0.457629	0.024242	0.001966	0.52419	0.485204	0.012171	0.083867
AGGKAGKDSGKAKAKAVSR(H2AV_1_19)	H2AV_1_19 unmod	0.999873	0.999002	0.99811	0.992247	0.946262	0.942354	0.939095	0.928303	0.922464	0.887743	0.93928	0.885469
AGGKAGKDSGKAKAKAVSR(H2AV_1_19)	H2AV_1_19 K4ac	0	0	1e-06	0	0	0.000614	0.024631	0.010576	0.053832	0.061141	0.014912	0.033964
AGGKAGKDSGKAKAKAVSR(H2AV_1_19)	H2AV_1_19 K7ac	0	0	1e-06	0	0	0.000614	0.032137	0.059919	0.010719	0.038743	0.036784	0.025585
AGGKAGKDSGKAKAKAVSR(H2AV_1_19)	H2AV_1_19 K11ac	5e-06	1e-06	1.4e-05	7.5e-05	0.000194	0.000259	0	6e-06	0.007911	2.6e-05	0.007837	0.026507
AGGKAGKDSGKAKAKAVSR(H2AV_1_19)	H2AV_1_19 K15ac	4.5e-05	4e-06	4e-05	0.00753	0.053014	0.000313	1e-06	0	0	0	2e-06	0.020956
AGGKAGKDSGKAKAKAVSR(H2AV_1_19)	H2AV_1_19 K4acK7ac	1.4e-05	2.5e-05	0.000318	2.2e-05	2.5e-05	1.5e-05	8e-06	0.000125	0.000448	0.00061	2.2e-05	0.001075
AGGKAGKDSGKAKAKAVSR(H2AV_1_19)	H2AV_1_19 K4acK11ac	1.4e-05	2.5e-05	0.000318	2.2e-05	2.5e-05	1.5e-05	8e-06	0.000125	0.000448	0.00061	2.2e-05	0.001075
AGGKAGKDSGKAKAKAVSR(H2AV_1_19)	H2AV_1_19 K4acK15ac	4e-06	5.7e-05	0.00024	3.6e-05	0.000402	2.1e-05	0.000318	0.000351	0.00045	0.001236	1.4e-05	0.001639
AGGKAGKDSGKAKAKAVSR(H2AV_1_19)	H2AV_1_19 K7acK11ac	1.4e-05	2.5e-05	0.000318	2.2e-05	2.5e-05	1.5e-05	5e-06	0.000332	0.00042	0.000971	0.001083	0.001557
AGGKAGKDSGKAKAKAVSR(H2AV_1_19)	H2AV_1_19 K7acK15ac	1.4e-05	2.5e-05	0.000318	2.2e-05	2.5e-05	1.5e-05	8e-06	0.000125	0.000448	0.00061	2.2e-05	0.001075
AGGKAGKDSGKAKAKAVSR(H2AV_1_19)	H2AV_1_19 K11acK15ac	1.4e-05	2.5e-05	0.000318	2.2e-05	2.5e-05	1.5e-05	8e-06	0.000125	0.000448	0.00061	2.2e-05	0.001075
AGGKAGKDSGKAKAKAVSR(H2AV_1_19)	H2AV_1_19 K7acK11acK15ac	0	0	1e-06	0	0	0.013937	0.000945	4e-06	0.000603	0.001926	0	6e-06
AGGKAGKDSGKAKAKAVSR(H2AV_1_19)	H2AV_1_19 K4acK11acK15ac	0	0	1e-06	0	0	0.013937	0.000945	4e-06	0.000603	0.001926	0	6e-06
AGGKAGKDSGKAKAKAVSR(H2AV_1_19)	H2AV_1_19 K4acK7acK15ac	0	0	1e-06	0	0	0.013937	0.000945	4e-06	0.000603	0.001926	0	6e-06
AGGKAGKDSGKAKAKAVSR(H2AV_1_19)	H2AV_1_19 K4acK7acK11ac	0	0	1e-06	0	0	0.013937	0.000945	4e-06	0.000603	0.001926	0	6e-06
AGGKAGKDSGKAKAKAVSR(H2AV_1_19)	H2AV_1_19 K4acK7acK11acK15ac	0	0.000808	1e-06	0	0	0	1e-06	0	0	0	2e-06	0
AGGKAGKDSGKAKTKAVSR(H2AZ_1_19)	H2AZ_1_19 unmod	0.95344	0.944671	0.952141	0.941671	0.920058	0.938271	0.89361	0.899332	0.900257	0.88917	0.893993	0.881183
AGGKAGKDSGKAKTKAVSR(H2AZ_1_19)	H2AZ_1_19 K4ac	0.010222	0.019626	0.008751	0.025722	0.03557	0.007658	0.035979	0.038431	0.036627	0.040314	0.040264	0.039107
AGGKAGKDSGKAKTKAVSR(H2AZ_1_19)	H2AZ_1_19 K7ac	0.015331	0.017749	0.024261	0.02204	0.011223	0.022443	0.041633	0.033248	0.043654	0.044865	0.043807	0.047454
AGGKAGKDSGKAKTKAVSR(H2AZ_1_19)	H2AZ_1_19 K11ac	0.02085	0.013848	0.014823	0.010099	0.026353	0.031575	0.022884	0.019409	0.015579	0.021015	0.018074	0.022309
AGGKAGKDSGKAKTKAVSR(H2AZ_1_19)	H2AZ_1_19 K15ac	0	1e-06	1e-06	0.000355	0.000467	0	0.002178	0.002629	0.002953	0.001576	0.002056	0.002509
AGGKAGKDSGKAKTKAVSR(H2AZ_1_19)	H2AZ_1_19 K4acK7ac	3e-06	0.000542	4e-06	0	0.001029	9e-06	0.003003	0.001706	5.2e-05	0.000958	0.000161	0.005416
AGGKAGKDSGKAKTKAVSR(H2AZ_1_19)	H2AZ_1_19 K4acK11ac	3e-06	0.000542	4e-06	0	0.001029	9e-06	1e-06	0.000795	3.7e-05	0.000489	9.6e-05	0
AGGKAGKDSGKAKTKAVSR(H2AZ_1_19)	H2AZ_1_19 K4acK15ac	3e-06	0.000542	4e-06	0	0.001029	9e-06	0	0.001132	3e-06	0	5.6e-05	0
AGGKAGKDSGKAKTKAVSR(H2AZ_1_19)	H2AZ_1_19 K7acK11ac	3e-06	0.000542	4e-06	0	0.001029	9e-06	3e-06	0.000565	5.7e-05	0.000823	0.000172	0.002013
AGGKAGKDSGKAKTKAVSR(H2AZ_1_19)	H2AZ_1_19 K7acK15ac	3e-06	0.000542	4e-06	0	0.001029	9e-06	0	0.001132	3e-06	0	5.6e-05	0
AGGKAGKDSGKAKTKAVSR(H2AZ_1_19)	H2AZ_1_19 K11acK15ac	3e-06	0.000542	4e-06	0	0.001029	9e-06	1e-06	0.001033	3.6e-05	0.000641	9.6e-05	1e-06
AGGKAGKDSGKAKTKAVSR(H2AZ_1_19)	H2AZ_1_19 K7acK11acK15ac	3.5e-05	0.000213	0	1e-06	3.9e-05	0	0.000173	0.000147	0.000186	3.7e-05	0.000292	2e-06
AGGKAGKDSGKAKTKAVSR(H2AZ_1_19)	H2AZ_1_19 K4acK11acK15ac	3.5e-05	0.000213	0	1e-06	3.9e-05	0	0.000173	0.000147	0.000186	3.7e-05	0.000292	2e-06
AGGKAGKDSGKAKTKAVSR(H2AZ_1_19)	H2AZ_1_19 K4acK7acK15ac	3.5e-05	0.000213	0	1e-06	3.9e-05	0	0.000173	0.000147	0.000186	3.7e-05	0.000292	2e-06
AGGKAGKDSGKAKTKAVSR(H2AZ_1_19)	H2AZ_1_19 K4acK7acK11ac	3.5e-05	0.000213	0	1e-06	3.9e-05	0	0.000173	0.000147	0.000186	3.7e-05	0.000292	2e-06
AGGKAGKDSGKAKTKAVSR(H2AZ_1_19)	H2AZ_1_19 K4acK7acK11acK15ac	0	0	0	0.000109	0	0	1.7e-05	0	0	0	0	0
AKAKTR(H2A1_12_17)	H2A1_12_17 unmod	0.62634	0.649917	0.64507	0.65389	0.601222	0.676326	0.632985	0.610786	0.604384	0.615192	0.591264	0.622734
AKAKTR(H2A1_12_17)	H2A1_12_17 K13ac	0.000247	0.000272	7.1e-05	0.000248	0.000216	0.00034	0.000151	0.000325	0.000338	0.000309	0.000175	0.000193
AKAKTR(H2A1_12_17)	H2A1_12_17 K15ac	0.372847	0.347253	0.353392	0.345442	0.39246	0.322078	0.365575	0.37174	0.392964	0.383726	0.405198	0.377029
AKAKTR(H2A1_12_17)	H2A1_12_17 K13acK15ac	0.000478	0.00122	0.001385	0.000418	7.3e-05	0.001244	0.000172	0.000653	0.000678	0.000769	0.000969	4.4e-05
AKAKTR(H2A1_12_17)	H2A1_12_17 K15me1	7.6e-05	1e-06	8.2e-05	1e-06	8.8e-05	1.1e-05	0.001115	0.013819	0.001636	3e-06	0.002248	0
AKAKTR(H2A1_12_17)	H2A1_12_17 K13me1	1.2e-05	0.001338	0	0	0.005942	1e-06	1e-06	0.002677	0	1e-06	0.000146	0
AKAKSR(H2A3_12_17)	H2A3_12_17 unmod	0.393543	0.372834	0.327545	0.37284	0.373693	0.341313	0.387536	0.393586	0.421855	0.427009	0.797189	0.420359
AKAKSR(H2A3_12_17)	H2A3_12_17 K13ac	6e-06	0.000108	0.000105	6.9e-05	6e-06	3e-06	1.1e-05	0.000102	6.5e-05	0.000106	5e-06	3e-06
AKAKSR(H2A3_12_17)	H2A3_12_17 K15ac	2.9e-05	0.000203	0.000697	0.000188	1.4e-05	2.4e-05	6.8e-05	0.000423	0.000583	0.000524	4.6e-05	2.9e-05
AKAKSR(H2A3_12_17)	H2A3_12_17 K13acK15ac	0.000212	0.0005	1e-05	1.2e-05	0.000411	3e-05	1.3e-05	2.6e-05	1.4e-05	5e-06	3.8e-05	7e-06
AKAKSR(H2A3_12_17)	H2A3_12_17 K15me1	0.60621	0.626318	0.671643	0.62688	0.624648	0.65863	0.612373	0.605352	0.577484	0.572356	0.160898	0.579602
AKAKSR(H2A3_12_17)	H2A3_12_17 K13me1	0	3.8e-05	0	1e-05	0.001228	0	0	0.00051	0	0	0.041823	0
DNKKTR(H2A1_72_77)	H2A1_72_77 unmod	0.999962	0.998301	0.999969	0.999971	0.99968	0.999979	0.999898	0.999982	0.999972	0.999978	0.999988	0.999985
DNKKTR(H2A1_72_77)	H2A1_72_77 K74ac	3.8e-05	0.001699	3.1e-05	2.9e-05	0.00032	2.1e-05	0.000102	1.8e-05	2.8e-05	2.2e-05	1.2e-05	1.5e-05
HLQLAIR(H2A_82_88)	H2A_82_88 unmod	1	1	1	1	1	1	1	1	1	1	1	1
unmod(H2A_1_88)	H2A_1_88 H2A14s.HLQLAIR	0.759528	2.4e-05	0.775586	0.819774	0.673729	0.880022	0.874488	0.858855	0.884511	0.891272	0.872741	0.899077
unmod(H2A_1_88)	H2A_1_88 H2AZ.AGGKAGKDSGKAKTKAVSR	0.088489	0.401882	0.082365	0.068633	0.12913	0.045527	0.072649	0.08417	0.069817	0.065953	0.068015	0.055897
unmod(H2A_1_88)	H2A_1_88 H2AY.SAKAGVIFPVGR	0.007721	0.058491	0.009223	0.007694	0.020221	0.008321	0.007626	0.006318	0.006775	0.006527	0.004645	0.004044
unmod(H2A_1_88)	H2A_1_88 H2AX.GKTGGKAR	0.144263	0.539603	0.132827	0.103899	0.176919	0.06613	0.045237	0.050657	0.038897	0.036248	0.054599	0.040982
unmod(H2B_1_29)	H2B_1_29 1C.PEPAKSAPAPKKGSKKAVTKAQKKDGKKR	0.688398	0.632728	0.654424	0.591328	0.670621	0.643583	0.51374	0.533198	0.516345	0.465308	0.62138	0.505823
unmod(H2B_1_29)	H2B_1_29 1H.PDPAKSAPAPKKGSKKAVTKAQKKDGKKR	0.134057	0.153811	0.151467	0.164948	0.131341	0.148083	0.179297	0.152513	0.140836	0.160756	0.126601	0.155244
unmod(H2B_1_29)	H2B_1_29 2F.PDPAKSAPAPKKGSKKAVTKVQKKDGKKR	0.057039	0.06622	0.056364	0.075957	0.066559	0.069947	0.092415	0.104989	0.089122	0.121	0.079856	0.101607
unmod(H2B_1_29)	H2B_1_29 1B.PEPSKSAPAPKKGSKKAITKAQKKDGKKR	4.7e-05	8e-05	1.7e-05	0.00012	3.8e-05	2.6e-05	2.2e-05	0.000539	5.3e-05	0.000499	0.001585	3.6e-05
unmod(H2B_1_29)	H2B_1_29 1N.PEPSKSAPAPKKGSKKAVTKAQKKDGKKR	0.020142	0.029801	0.021425	0.030127	0.023752	0.03132	0.039286	0.040222	0.033707	0.030375	0.032376	0.03402
unmod(H2B_1_29)	H2B_1_29 1D.PEPTKSAPAPKKGSKKAVTKAQKKDGKKR	0.074525	0.086572	0.077249	0.11003	0.085593	0.081161	0.142458	0.143677	0.123633	0.126915	0.117975	0.133026
unmod(H2B_1_29)	H2B_1_29 1M.PEPVKSAPVPKKGSKKAINKAQKKDGKKR	0.00764	0.014451	0.007944	0.01153	0.011575	0.010979	0.006087	0.005682	0.002624	0.00286	0.005972	0.005583
unmod(H2B_1_29)	H2B_1_29 1L.PELAKSAPAPKKGSKKAVTKAQKKDGKKR	0.018153	0.016337	0.031109	0.01596	0.010522	0.014901	0.026694	0.01918	0.09368	0.092286	0.014253	0.064661

## Sheet: PTMs_EHMT2_HDAC7_KO
PTM	SW1116_C1	SW1116_C2	SW1116_EHMT2_KO1	SW1116_EHMT2_KO2	SW1116_HDAC7_KO1	SW1116_HDAC7_KO2	DLD1_C1	DLD1_C2	DLD1_EHMT2_KO1	DLD1_EHMT2_KO2	DLD1_HDAC7_KO1	DLD1_HDAC7_KO2
H3K4me1	0.007945	0.018341	0.017556	0.020965	0.017466	0.014283	0.053805	0.046435	0.059087	0.063562	0.045201	0.06349
H3K4me2	3e-06	1e-06	4e-06	1e-06	1e-06	0	5e-06	8e-06	4e-06	3e-06	2e-06	3e-06
H3K4me3	0	0	0	0	0	0	0	0	0	0	0	0
H3K4ac	0.000184	1.6e-05	1.8e-05	0.000164	6e-06	0.000154	5e-06	0.000254	0.000219	0.000139	0.000204	0.000123
H3K9me1	0.227354	0.219328	0.162779	0.190258	0.201731	0.222171	0.209952	0.1991	0.14586	0.140734	0.215462	0.215275
H3K9me2	0.292741	0.280104	0.115981	0.128226	0.279818	0.2921	0.254	0.24621	0.134262	0.145815	0.253873	0.214891
H3K9me3	0.089118	0.087053	0.068928	0.073538	0.079952	0.096911	0.160089	0.152466	0.176155	0.173359	0.135299	0.141919
H3K9ac	0.012846	0.013844	0.014696	0.025172	0.012214	0.018556	0.013391	0.015091	0.021995	0.016944	0.018549	0.015621
H3S10ph	0	0	0	0	0	0	0	0	0	0	0	0
H3K14ac	0.173561	0.223785	0.167149	0.194093	0.208909	0.216675	0.220402	0.234873	0.206515	0.218246	0.227976	0.250537
H3K18me1	0.000392	0.000724	0.00035	0.000718	0.000417	0.0006	0.000649	0.000823	0.001103	0.001103	0.000802	0.000736
H3K18ac	0.037532	0.040875	0.035274	0.046966	0.035573	0.038585	0.037401	0.075546	0.046431	0.031102	0.07924	0.059188
H3K23me1	0.000451	0.00083	0.000415	0.000797	0.000503	0.000738	0.00054	0.000647	0.000611	0.000896	0.000769	0.000708
H3K23ac	0.216372	0.256475	0.232837	0.195096	0.268567	0.20102	0.191625	0.126267	0.170238	0.183102	0.116287	0.122136
H31K27me1	0.151962	0.088834	0.219567	0.171335	0.103737	0.164142	0.203099	0.180873	0.209178	0.314107	0.213222	0.343422
H31K27me2	0.498592	0.47657	0.430725	0.444566	0.473996	0.435798	0.4414	0.463861	0.447391	0.37608	0.416529	0.327141
H31K27me3	0.207741	0.289622	0.175558	0.204629	0.246473	0.208545	0.181938	0.153636	0.165416	0.113772	0.134357	0.081218
H31K27ac	1.5e-05	0.000694	0.000609	0.000182	4.4e-05	5.7e-05	0.000464	7.3e-05	0.000271	0.000459	0.00057	0.000461
H31K36me1	0.130674	0.081097	0.140453	0.119157	0.08151	0.105239	0.131377	0.133883	0.127471	0.132321	0.136621	0.188865
H31K36me2	0.169862	0.126573	0.18541	0.133975	0.140446	0.132707	0.333483	0.237935	0.321323	0.329749	0.225666	0.258831
H31K36me3	0.100798	0	0.110434	0.017224	0	0.016469	0.028671	4e-06	0.026923	0.05699	0	0.058065
H33K27me1	0.21134	0.043303	0.281729	0.163378	0.094172	0.178161	0.165335	0.129917	0.198738	0.357235	0.111	0.350987
H33K27me2	0.422908	0.513951	0.343291	0.443256	0.450219	0.315636	0.515833	0.464049	0.388799	0.305467	0.42557	0.237748
H33K27me3	0.158989	0.240784	0.150625	0.158666	0.193291	0.184821	0.053549	0.076341	0.068409	0.03659	0.034762	0.007779
H33K27ac	0	0	0	0	0	0	1e-06	0	0	0	2e-06	0
H33K36me1	0.119059	0.016542	0.155896	0.11632	0.078848	0.161164	0.123181	0.134809	0.198087	0.240762	0.117003	0.187109
H33K36me2	0.237082	0.148411	0.251411	0.187561	0.205252	0.198849	0.639844	0.482239	0.53207	0.525418	0.492665	0.424917
H33K36me3	0.16503	4e-06	0.173239	0.037581	2e-06	0.045511	0.051708	1.4e-05	0.048754	0.090683	1e-05	0.117127
H3K56me1	0.000165	0.000271	2.2e-05	0	3.6e-05	7.5e-05	7e-06	6.2e-05	0.000296	7.5e-05	8.2e-05	6.4e-05
H3K56me2	0.000571	0.030659	0.006985	0.004175	0.040995	0.000641	0.011615	0.007583	0.003634	0.002611	0.023243	0.006387
H3K56me3	2.1e-05	0	0	0	6e-06	0	8e-06	0	0	0	0	0
H3K56ac	0	0	0	6e-06	2.8e-05	1.1e-05	5.4e-05	0	9e-06	2.1e-05	0	0
H3K79me1	0.028089	0.014982	0.042583	0.067563	0.038853	0.070894	0.049691	0.052763	0.071037	0.086671	0.053859	0.057602
H3K79me2	0.013631	0.030097	0.015579	0.018716	0.019643	0.020532	0.010783	0.009139	0.013029	0.013725	0.009757	0.011515
H3K79me3	3e-05	0	0	4e-06	0	0	9e-06	0	9e-06	0	0	0
H3K79ac	6.4e-05	0.000263	0.000191	0.000224	1.2e-05	2.1e-05	7.1e-05	3.5e-05	0.000202	0.000228	3.7e-05	4.7e-05
H3K122ac	4.7e-05	0.000249	8.7e-05	4.4e-05	3.2e-05	9.8e-05	0.000774	0.001118	0.001108	0.001543	0.001475	0.001514
H4K5ac	0.031738	0.049318	0.03317	0.040676	0.046081	0.046457	0.041288	0.044402	0.039589	0.039218	0.048564	0.046008
H4K8ac	0.047335	0.059708	0.052949	0.055695	0.061776	0.061659	0.049571	0.061409	0.070579	0.070119	0.057207	0.080417
H4K12ac	0.076822	0.104805	0.0997	0.096182	0.082446	0.084543	0.128023	0.132704	0.103772	0.102765	0.11285	0.115176
H4K16ac	0.121784	0.138608	0.119164	0.130273	0.179932	0.138794	0.327047	0.30365	0.3033	0.300249	0.327443	0.268154
H4K20me1	0.172881	0.166281	0.211058	0.178855	0.160692	0.177364	0.096123	0.09509	0.117476	0.109364	0.116804	0.104165
H4K20me2	0.721144	0.725226	0.668015	0.687802	0.727729	0.689622	0.827718	0.827222	0.809717	0.826943	0.783489	0.796501
H4K20me3	0.003509	0.003302	0.003309	0.003579	0.003585	0.003957	0.01425	0.01009	0.011396	0.011005	0.010726	0.008809
H4K20ac	0	0	0	5e-06	2e-06	1e-06	5.8e-05	3.1e-05	8e-06	5.3e-05	5e-06	7.1e-05
H4K44ac	5e-06	1.8e-05	1.7e-05	5e-06	6e-06	8e-06	0.000775	7.6e-05	0.000527	0.000828	0.000267	0.000207
H12	0.095296	0.08046	0.097053	0.114166	0.03622	0.059675	0.105466	0.079677	0.091736	0.104126	0.105484	0.08803
H13	0.311265	0.164044	0.349735	0.29935	0.198769	0.304367	0.141963	0.151719	0.135529	0.163122	0.098927	0.09843
H14	0.593439	0.755496	0.553211	0.586484	0.765012	0.635958	0.530101	0.609654	0.598652	0.529031	0.644494	0.68861
H15	0	0	0	0	0	0	0.222471	0.15895	0.174084	0.203722	0.151094	0.124929
H11	0.246934	0.401721	0.265117	0.184114	0.393291	0.252335	0.136826	0.043027	0.085317	0.081091	0.241341	0.125529
H1v234	0.75305	0.598146	0.73348	0.815364	0.600589	0.746474	0.862123	0.944568	0.890031	0.916722	0.717046	0.872709
H15_2	1.6e-05	0.000131	5.4e-05	0.00052	0.004881	0.000781	0.001052	0.012403	0.02293	0.001917	0.039995	0.001759
H1T	0	2e-06	0.001349	3e-06	0.00124	0.00041	0	2e-06	0.001722	0.00027	0.001617	3e-06
H2A1K36ac	1.5e-05	5e-06	1e-06	1e-06	0	1.3e-05	2e-06	2.8e-05	6e-06	5e-06	8e-06	0
H2A3K36ac	0.000142	4.1e-05	0.000171	0.00035	1.3e-05	8.3e-05	2.3e-05	0.00049	1e-06	0.000254	0.00118	0.000412
H2AXK36ac	0.000226	0.000762	4e-06	7e-05	0.000213	1e-06	0.00028	0.000465	0.000331	0.000344	0.006026	0.000752
H2A1K5ac	0.009251	0.016694	0.008735	0.014738	0.016746	0.018455	0.032946	0.043144	0.032976	0.03959	0.041182	0.051438
H2A1K9ac	0.000269	0.00187	0.001355	0.001261	0.001565	0.00161	0.004331	0.005744	0.007364	0.005981	0.00784	0.007862
H2A1K5me1	1.5e-05	0.000324	3e-05	0.000135	0.000578	0.000214	0.000771	0.000292	0.000287	0.000553	0.000405	0.000527
H2A1K9me1	0.000128	0.000189	1.8e-05	0.000166	0.000232	2.3e-05	0.00017	0.000228	0.000166	0.000198	0.00012	0.00023
H2AJK5ac	0.000668	0.920445	0.038427	0.064603	0.984578	0.002862	0.012666	0.989962	0.000877	0.004286	0.982488	0.003
H2AJK9ac	0.000669	0.920446	0.038442	0.064107	0.984584	0.002864	0.012666	0.989962	0.000877	0.004286	0.982488	0.003
H2AJK5me1	0.000232	0.028909	0.001036	0.010389	0.013569	0.000465	0	0	0.002192	0.000322	0.002541	0.000373
H2AJK9me1	0.000224	0	0.001124	0.008321	0	0.000265	0.015435	0.002846	0.006849	0.001951	2e-06	0.001775
H2AXK5ac	0.000197	0.000746	2.7e-05	2.9e-05	0.000246	2.8e-05	0.001804	0.003487	0.000693	0.001045	0.001458	0.004392
H2AXK9ac	0.012396	0.006497	9.4e-05	0.008235	0.023402	0.007712	0.001673	0.012146	0.000387	0.000736	0.002514	0.002551
H2AXK5me1	0.215298	0.241771	0.207076	0.236649	0.235381	0.22807	0.23813	0.222296	0.221351	0.246669	0.221551	0.257136
H2AXK9me1	0.694958	0.624468	0.697246	0.626252	0.609892	0.629526	0.591306	0.624671	0.649754	0.636184	0.652759	0.625174
H2AVK4ac	3.2e-05	0.000915	0.000881	8e-05	0.000452	0.042476	0.027801	0.011189	0.056987	0.069375	0.014972	0.037771
H2AVK7ac	4.2e-05	0.000883	0.000959	6.6e-05	7.5e-05	0.04247	0.034994	0.060513	0.013844	0.046712	0.037913	0.02931
H2AVK11ac	4.7e-05	0.000884	0.000972	0.000141	0.000269	0.042115	0.002857	0.0006	0.011036	0.007995	0.008966	0.030232
H2AVK15ac	7.7e-05	0.000919	0.00092	0.00761	0.053466	0.042175	0.003171	0.000613	0.003155	0.008234	6.2e-05	0.024763
H2AZK4ac	0.010336	0.021891	0.008763	0.025834	0.038774	0.007685	0.039519	0.042505	0.037277	0.041872	0.041453	0.044529
H2AZK7ac	0.015445	0.020014	0.024273	0.022152	0.014427	0.02247	0.045175	0.037092	0.044324	0.046757	0.045072	0.054889
H2AZK11ac	0.020964	0.016113	0.014835	0.010211	0.029557	0.031602	0.023425	0.022243	0.016267	0.023079	0.019314	0.024329
H2AZK15ac	0.000114	0.002266	1.3e-05	0.000467	0.003671	2.7e-05	0.002715	0.006367	0.003553	0.002328	0.00314	0.002516
H2A1K13ac	0.000725	0.001492	0.001456	0.000666	0.000289	0.001584	0.000323	0.000978	0.001016	0.001078	0.001144	0.000237
H2A1K15ac	0.373325	0.348473	0.354777	0.34586	0.392533	0.323322	0.365747	0.372393	0.393642	0.384495	0.406167	0.377073
H2A1K13me1	1.2e-05	0.001338	0	0	0.005942	1e-06	1e-06	0.002677	0	1e-06	0.000146	0
H2A1K15me1	7.6e-05	1e-06	8.2e-05	1e-06	8.8e-05	1.1e-05	0.001115	0.013819	0.001636	3e-06	0.002248	0
H2A3K13ac	0.000218	0.000608	0.000115	8.1e-05	0.000417	3.3e-05	2.4e-05	0.000128	7.9e-05	0.000111	4.3e-05	1e-05
H2A3K15ac	0.000241	0.000703	0.000707	0.0002	0.000425	5.4e-05	8.1e-05	0.000449	0.000597	0.000529	8.4e-05	3.6e-05
H2A3K13me1	0	3.8e-05	0	1e-05	0.001228	0	0	0.00051	0	0	0.041823	0
H2A3K15me1	0.60621	0.626318	0.671643	0.62688	0.624648	0.65863	0.612373	0.605352	0.577484	0.572356	0.160898	0.579602
H2A14s.HLQLAIR	0.759528	2.4e-05	0.775586	0.819774	0.673729	0.880022	0.874488	0.858855	0.884511	0.891272	0.872741	0.899077
H2AZ.AGGKAGKDSGKAKTKAVSR	0.088489	0.401882	0.082365	0.068633	0.12913	0.045527	0.072649	0.08417	0.069817	0.065953	0.068015	0.055897
H2AY.SAKAGVIFPVGR	0.007721	0.058491	0.009223	0.007694	0.020221	0.008321	0.007626	0.006318	0.006775	0.006527	0.004645	0.004044
H2AX.GKTGGKAR	0.144263	0.539603	0.132827	0.103899	0.176919	0.06613	0.045237	0.050657	0.038897	0.036248	0.054599	0.040982
H2B1C	0.688398	0.632728	0.654424	0.591328	0.670621	0.643583	0.51374	0.533198	0.516345	0.465308	0.62138	0.505823
H2B1H	0.134057	0.153811	0.151467	0.164948	0.131341	0.148083	0.179297	0.152513	0.140836	0.160756	0.126601	0.155244
H2B1F	0.057039	0.06622	0.056364	0.075957	0.066559	0.069947	0.092415	0.104989	0.089122	0.121	0.079856	0.101607
H2B1B	4.7e-05	8e-05	1.7e-05	0.00012	3.8e-05	2.6e-05	2.2e-05	0.000539	5.3e-05	0.000499	0.001585	3.6e-05
H2B1N	0.020142	0.029801	0.021425	0.030127	0.023752	0.03132	0.039286	0.040222	0.033707	0.030375	0.032376	0.03402
H2B1D	0.074525	0.086572	0.077249	0.11003	0.085593	0.081161	0.142458	0.143677	0.123633	0.126915	0.117975	0.133026
H2B1M	0.00764	0.014451	0.007944	0.01153	0.011575	0.010979	0.006087	0.005682	0.002624	0.00286	0.005972	0.005583
H2B1L	0.018153	0.016337	0.031109	0.01596	0.010522	0.014901	0.026694	0.01918	0.09368	0.092286	0.014253	0.064661
