# Supplementary material
Source: Research Square preprint supplement (doi:10.21203/rs.3.rs-9763213/v1)
Supplement: Supplementary file 7 [file 609947a266b8dee44d209f2b.xlsx]

## Sheet: PhenoData_Local
Sample_Name	Sample_Group	Pair	CMS	Sex	Age	Location	TNM
C01	Control	1	CMS2	Male	87	Ascending	T4aN2aM0
M01	Peritumor	1	CMS2	Male	87	Ascending	T4aN2aM0
T01	Tumor	1	CMS2	Male	87	Ascending	T4aN2aM0
C02	Control	2	CMS2	Female	65	Descending	T3N1bM0
M02	Peritumor	2	CMS2	Female	65	Descending	T3N1bM0
T02	Tumor	2	CMS2	Female	65	Descending	T3N1bM0
C03	Control	3	CMS4	Male	71	Descending	T3N0M0
M03	Peritumor	3	CMS4	Male	71	Descending	T3N0M0
T03	Tumor	3	CMS4	Male	71	Descending	T3N0M0
C04	Control	4	CMS3	Male	78	Descending	T2N0M0
M04	Peritumor	4	CMS3	Male	78	Descending	T2N0M0
T04	Tumor	4	CMS3	Male	78	Descending	T2N0M0
C05	Control	5	CMS2	Male	77	Descending	T3N1bM0
M05	Peritumor	5	CMS2	Male	77	Descending	T3N1bM0
T05	Tumor	5	CMS2	Male	77	Descending	T3N1bM0
C06	Control	6	CMS3	Male	48	Transverse	T3N0M0
M06	Peritumor	6	CMS3	Male	48	Transverse	T3N0M0
T06	Tumor	6	CMS3	Male	48	Transverse	T3N0M0
C07	Control	7	CMS2	Male	67	Ascending	T2N0M0
M07	Peritumor	7	CMS2	Male	67	Ascending	T2N0M0
T07	Tumor	7	CMS2	Male	67	Ascending	T2N0M0
C08	Control	8	Mixed	Male	60	Descending	T4aN2aM0
M08	Peritumor	8	Mixed	Male	60	Descending	T4aN2aM0
T08	Tumor	8	Mixed	Male	60	Descending	T4aN2aM0
C09	Control	9	CMS1	Female	84	Ascending	T3N0M0
M09	Peritumor	9	CMS1	Female	84	Ascending	T3N0M0
T09	Tumor	9	CMS1	Female	84	Ascending	T3N0M0
C10	Control	10	CMS4	Male	69	Ascending	T3N0M0
M10	Peritumor	10	CMS4	Male	69	Ascending	T3N0M0
T10	Tumor	10	CMS4	Male	69	Ascending	T3N0M0
C11	Control	11	CMS2	Male	60	Descending	T3N0M0
M11	Peritumor	11	CMS2	Male	60	Descending	T3N0M0
T11	Tumor	11	CMS2	Male	60	Descending	T3N0M0
C12	Control	12	Mixed	Female	59	Descending	T2N1aM0
M12	Peritumor	12	Mixed	Female	59	Descending	T2N1aM0
T12	Tumor	12	Mixed	Female	59	Descending	T2N1aM0
C13	Control	13	CMS4	Male	60	Descending	T2N0M0
M13	Peritumor	13	CMS4	Male	60	Descending	T2N0M0
T13	Tumor	13	CMS4	Male	60	Descending	T2N0M0
C14	Control	14	CMS2	Male	43	Transverse	T3N0M0
M14	Peritumor	14	CMS2	Male	43	Transverse	T3N0M0
T14	Tumor	14	CMS2	Male	43	Transverse	T3N0M0
C15	Control	15	CMS1	Female	91	Ascending	T4aN0M0
M15	Peritumor	15	CMS1	Female	91	Ascending	T4aN0M0
T15	Tumor	15	CMS1	Female	91	Ascending	T4aN0M0
C16	Control	16	CMS1	Female	58	Ascending	T3N0M0
M16	Peritumor	16	CMS1	Female	58	Ascending	T3N0M0
T16	Tumor	16	CMS1	Female	58	Ascending	T3N0M0
C17	Control	17	Mixed	Female	80	Transverse	T4aN0M0
M17	Peritumor	17	Mixed	Female	80	Transverse	T4aN0M0
T17	Tumor	17	Mixed	Female	80	Transverse	T4aN0M0
C18	Control	18	CMS4	Male	64	Transverse	T4aN1aM0
M18	Peritumor	18	CMS4	Male	64	Transverse	T4aN1aM0
T18	Tumor	18	CMS4	Male	64	Transverse	T4aN1aM0
C19	Control	19	CMS1	Male	70	Ascending	T3N0M0
M19	Peritumor	19	CMS1	Male	70	Ascending	T3N0M0
T19	Tumor	19	CMS1	Male	70	Ascending	T3N0M0
C20	Control	20	CMS2	Male	69	Descending	T3N0M0
M20	Peritumor	20	CMS2	Male	69	Descending	T3N0M0
T20	Tumor	20	CMS2	Male	69	Descending	T3N0M0
C21	Control	21	CMS3	Male	72	Ascending	T3N0M0
M21	Peritumor	21	CMS3	Male	72	Ascending	T3N0M0
T21	Tumor	21	CMS3	Male	72	Ascending	T3N0M0
C22	Control	22	CMS3	Male	58	Ascending	T3N1aM0
M22	Peritumor	22	CMS3	Male	58	Ascending	T3N1aM0
T22	Tumor	22	CMS3	Male	58	Ascending	T3N1aM0
C23	Control	23	CMS1	Male	77	Descending	T3N0M0
M23	Peritumor	23	CMS1	Male	77	Descending	T3N0M0
T23	Tumor	23	CMS1	Male	77	Descending	T3N0M0
C24	Control	24	CMS2	Male	80	Ascending	T4aN0M0
M24	Peritumor	24	CMS2	Male	80	Ascending	T4aN0M0
T24	Tumor	24	CMS2	Male	80	Ascending	T4aN0M0
RKO	Cell_line	NA	Mixed	Male	NA	NA	NA
CCD112	Cell_line	NA	NA	Female	NA	NA	NA
CACO2	Cell_line	NA	CMS4	Male	NA	NA	NA
SW1116	Cell_line	NA	CMS2	Male	NA	NA	NA
LOVO	Cell_line	NA	Mixed	Male	NA	NA	NA
SW48	Cell_line	NA	Mixed	Female	NA	NA	NA
HT29	Cell_line	NA	CMS3	Female	NA	NA	NA
COLO205	Cell_line	NA	Mixed	Male	NA	NA	NA
DLD1	Cell_line	NA	CMS1	Male	NA	NA	NA
HCT116	Cell_line	NA	CMS4	Male	NA	NA	NA

## Sheet: PhenoData_TCGA
Sample_Name	Sample_Group	Pair	Sex	Age	Location	TNM	OS	OS.time	DSS	DSS.time	DFI	DFI.time	PFI	PFI.time
TCGA-3L-AA1B-01	Tumor	NA	Female	61	Cecum	T2N0M0	0	475	0	475	0	475	0	475
TCGA-4N-A93T-01	Tumor	NA	Male	67	Ascending Colon	T4aN1bM0	0	146	0	146	NA	NA	0	146
TCGA-4T-AA8H-01	Tumor	NA	Female	42	Descending Colon	T3N0MX	0	385	0	385	0	385	0	385
TCGA-5M-AAT4-01	Tumor	NA	Male	74	Ascending Colon	T3N0M1b	1	49	1	49	NA	NA	1	49
TCGA-5M-AAT6-01	Tumor	NA	Female	40	Transverse Colon	T4aN2bM1a	1	290	1	290	NA	NA	1	219
TCGA-5M-AATE-01	Tumor	NA	Male	76	Ascending Colon	T3N0M0	0	1200	0	1200	NA	NA	1	810
TCGA-A6-2671-11	Control	NA	Male	85	Sigmoid Colon	T3N2M1	1	1331	1	1331	NA	NA	1	535
TCGA-A6-2672-01	Tumor	NA	Female	82	[Discrepancy]	T3N1M0	0	1419	0	1419	0	1419	0	1419
TCGA-A6-2674-01	Tumor	NA	Male	71	Sigmoid Colon	T3N2M1	0	1331	0	1331	NA	NA	1	735
TCGA-A6-2675-01	Tumor	1	Male	78	Sigmoid Colon	T3N0MX	0	1321	0	1321	0	1321	0	1321
TCGA-A6-2675-11	Control	1	Male	78	Sigmoid Colon	T3N0MX	0	1321	0	1321	0	1321	0	1321
TCGA-A6-2677-01	Tumor	NA	Female	68	Cecum	T3N2M0	1	740	0	740	NA	NA	0	740
TCGA-A6-2678-11	Control	NA	Female	43	Transverse Colon	T3N1M0	0	1286	0	1286	0	1286	0	1286
TCGA-A6-2679-11	Control	NA	Female	73	Ascending Colon	T3N0	0	1366	0	1366	0	1366	0	1366
TCGA-A6-2680-11	Control	NA	Female	72	Hepatic Flexure	T3N0M0	0	1068	0	1068	0	1068	0	1068
TCGA-A6-2682-01	Tumor	2	Male	70	[Discrepancy]	T4bN1M1	1	424	1	424	NA	NA	1	381
TCGA-A6-2682-11	Control	2	Male	70	[Discrepancy]	T4bN1M1	1	424	1	424	NA	NA	1	381
TCGA-A6-2683-11	Control	NA	Female	57	Ascending Colon	T4N0M1	1	504	1	504	NA	NA	1	300
TCGA-A6-2684-01	Tumor	3	Female	75	Cecum	T2N0M0	0	1127	0	1127	NA	NA	1	976
TCGA-A6-2684-11	Control	3	Female	75	Cecum	T2N0M0	0	1127	0	1127	NA	NA	1	976
TCGA-A6-2685-01	Tumor	4	Female	48	Sigmoid Colon	T3N0M0	0	1133	0	1133	NA	NA	1	948
TCGA-A6-2685-11	Control	4	Female	48	Sigmoid Colon	T3N0M0	0	1133	0	1133	NA	NA	1	948
TCGA-A6-2686-01	Tumor	5	Female	81	Cecum	T3N0M0	1	1126	0	1126	0	1126	0	1126
TCGA-A6-2686-11	Control	5	Female	81	Cecum	T3N0M0	1	1126	0	1126	0	1126	0	1126
TCGA-A6-3809-01	Tumor	NA	Female	71	Transverse Colon	T4N0M0	0	996	0	996	NA	NA	0	996
TCGA-A6-3810-01	Tumor	NA	Male	62	Sigmoid Colon	T3N0M0	0	1111	0	1111	0	1111	0	1111
TCGA-A6-4105-01	Tumor	NA	Male	79	Ascending Colon	T3N0M0	1	442	0	442	NA	NA	1	364
TCGA-A6-5656-01	Tumor	NA	Male	74	Sigmoid Colon	T2N0M0	0	1001	0	1001	0	1001	0	1001
TCGA-A6-5657-01	Tumor	NA	Male	65	[Discrepancy]	T3N1M0	0	962	0	962	0	962	0	962
TCGA-A6-5659-01	Tumor	6	Male	82	Cecum	T2N0M0	0	926	0	926	0	926	0	926
TCGA-A6-5659-11	Control	6	Male	82	Cecum	T2N0M0	0	926	0	926	0	926	0	926
TCGA-A6-5660-01	Tumor	NA	Male	73	Cecum	T3N2bM0	0	888	0	888	0	888	0	888
TCGA-A6-5661-01	Tumor	NA	Female	80	Ascending Colon	T3N0M0	0	1020	0	1020	0	1020	0	1020
TCGA-A6-5662-01	Tumor	7	Male	46	Splenic Flexure	T3N2M1	0	718	0	718	NA	NA	1	495
TCGA-A6-5662-11	Control	7	Male	46	Splenic Flexure	T3N2M1	0	718	0	718	NA	NA	1	495
TCGA-A6-5664-01	Tumor	NA	Male	80	Cecum	T4aN2aMX	0	672	0	672	NA	NA	1	183
TCGA-A6-5665-01	Tumor	8	Female	84	Ascending Colon	T3N0M0	0	671	0	671	NA	NA	1	529
TCGA-A6-5665-11	Control	8	Female	84	Ascending Colon	T3N0M0	0	671	0	671	NA	NA	1	529
TCGA-A6-5666-01	Tumor	NA	Male	78	Sigmoid Colon	T4bN0M0	0	995	0	995	1	509	1	509
TCGA-A6-5667-01	Tumor	9	Female	40	Sigmoid Colon	T3N1aMX	0	887	0	887	0	887	0	887
TCGA-A6-5667-11	Control	9	Female	40	Sigmoid Colon	T3N1aMX	0	887	0	887	0	887	0	887
TCGA-A6-6137-01	Tumor	NA	Male	55	Hepatic Flexure	T3N1cM0	0	824	0	824	0	824	0	824
TCGA-A6-6138-01	Tumor	NA	Male	61	Cecum	T2N0M0	0	685	0	685	NA	NA	0	685
TCGA-A6-6140-01	Tumor	NA	Male	62	Descending Colon	T3N0M0	0	734	0	734	0	734	0	734
TCGA-A6-6141-01	Tumor	NA	Male	31	Cecum	T3N0M0	0	255	0	255	NA	NA	0	255
TCGA-A6-6142-01	Tumor	NA	Female	56	Sigmoid Colon	T3N1aM1a	0	763	0	763	NA	NA	1	654
TCGA-A6-6648-01	Tumor	NA	Male	56	[Discrepancy]	T3N0M1a	0	766	0	766	NA	NA	1	686
TCGA-A6-6649-01	Tumor	NA	Male	66	Hepatic Flexure	T3N1bM0	0	735	0	735	0	735	0	735
TCGA-A6-6650-01	Tumor	NA	Female	69	Cecum	T3N0M0	0	627	0	627	NA	NA	0	627
TCGA-A6-6651-01	Tumor	NA	Female	55	Transverse Colon	T3N1bMX	0	662	0	662	NA	NA	0	662
TCGA-A6-6652-01	Tumor	NA	Male	59	Sigmoid Colon	T3N0M1	0	751	0	751	NA	NA	0	751
TCGA-A6-6653-01	Tumor	NA	Male	82	Ascending Colon	T2N0M0	0	742	0	742	0	742	0	742
TCGA-A6-6654-01	Tumor	NA	Female	65	Descending Colon	T3N1M0	0	726	0	726	0	726	0	726
TCGA-A6-6780-01	Tumor	NA	Male	74	[Discrepancy]	T3N0MX	0	612	0	612	0	612	0	612
TCGA-A6-6781-01	Tumor	NA	Male	43	Transverse Colon	T4bN1bMX	0	598	0	598	0	598	0	598
TCGA-A6-6782-01	Tumor	NA	Male	82	Transverse Colon	T4aN0MX	0	617	0	617	0	617	0	617
TCGA-A6-A565-01	Tumor	NA	Female	34	Transverse Colon	T3N2MX	1	494	1	494	NA	NA	1	301
TCGA-A6-A566-01	Tumor	NA	Female	55	Descending Colon	T4N1M0	1	758	1	758	NA	NA	1	257
TCGA-A6-A567-01	Tumor	NA	Male	56	Sigmoid Colon	T3N1M1	1	1881	1	1881	NA	NA	1	612
TCGA-A6-A56B-01	Tumor	NA	Male	57	Sigmoid Colon	T3N1M0	1	1711	0	1711	1	1678	1	1678
TCGA-A6-A5ZU-01	Tumor	NA	Male	59	Transverse Colon	T3N1M0	0	293	0	293	0	293	0	293
TCGA-AA-3489-01	Tumor	10	Male	75	Sigmoid Colon	T3N0M0	1	214	1	214	NA	NA	1	214
TCGA-AA-3489-11	Control	10	Male	75	Sigmoid Colon	T3N0M0	1	214	1	214	NA	NA	1	214
TCGA-AA-3492-01	Tumor	NA	Female	90	Ascending Colon	T3N0M0	1	92	0	92	NA	NA	0	92
TCGA-AA-3495-01	Tumor	NA	Male	79	Hepatic Flexure	T2N0M0	0	1127	0	1127	0	1127	0	1127
TCGA-AA-3496-01	Tumor	11	Female	83	Ascending Colon	T3N0M0	0	31	0	31	NA	NA	0	31
TCGA-AA-3496-11	Control	11	Female	83	Ascending Colon	T3N0M0	0	31	0	31	NA	NA	0	31
TCGA-AA-3502-01	Tumor	NA	Male	73	Transverse Colon	T2N0M0	0	1065	0	1065	0	1065	0	1065
TCGA-AA-3506-01	Tumor	NA	Male	77	Hepatic Flexure	T2N0M0	0	1765	0	1765	NA	NA	0	1765
TCGA-AA-3509-01	Tumor	NA	Female	54	Sigmoid Colon	T3N0M0	0	1915	0	1915	0	1915	0	1915
TCGA-AA-3511-01	Tumor	12	Male	64	Sigmoid Colon	T4N0M0	0	212	0	212	1	59	1	59
TCGA-AA-3511-11	Control	12	Male	64	Sigmoid Colon	T4N0M0	0	212	0	212	1	59	1	59
TCGA-AA-3514-11	Control	NA	Female	81	Ascending Colon	T2N0M0	0	31	0	31	NA	NA	0	31
TCGA-AA-3516-11	Control	NA	Female	74	Ascending Colon	T3N2M0	1	396	1	396	NA	NA	1	396
TCGA-AA-3517-11	Control	NA	Male	60	Splenic Flexure	T3N0M0	0	1186	0	1186	1	821	1	821
TCGA-AA-3518-11	Control	NA	Female	81	Cecum	T3N0M0	0	31	0	31	NA	NA	0	31
TCGA-AA-3520-11	Control	NA	Female	86	Ascending Colon	T3N0M0	0	731	0	731	NA	NA	0	731
TCGA-AA-3522-11	Control	NA	Male	67	Ascending Colon	T3N0M0	0	1127	0	1127	0	1127	0	1127
TCGA-AA-3525-11	Control	NA	Male	90	Hepatic Flexure	T3N1M0	0	245	0	245	NA	NA	0	245
TCGA-AA-3526-01	Tumor	NA	Male	57	Sigmoid Colon	T2N0M0	0	580	0	580	0	580	0	580
TCGA-AA-3527-11	Control	NA	Female	90	Cecum	T3N0M0	0	0	0	0	NA	NA	0	0
TCGA-AA-3531-11	Control	NA	Female	75	Sigmoid Colon	T3N0M0	0	1035	0	1035	0	1035	0	1035
TCGA-AA-3534-11	Control	NA	Female	78	Ascending Colon	T3N0M0	0	882	0	882	0	882	0	882
TCGA-AA-3655-01	Tumor	13	Male	68	Sigmoid Colon	T3N0M0	0	1856	0	1856	0	1856	0	1856
TCGA-AA-3655-11	Control	13	Male	68	Sigmoid Colon	T3N0M0	0	1856	0	1856	0	1856	0	1856
TCGA-AA-3660-01	Tumor	14	Female	51	Sigmoid Colon	T3N0M0	0	2375	0	2375	0	2375	0	2375
TCGA-AA-3660-11	Control	14	Female	51	Sigmoid Colon	T3N0M0	0	2375	0	2375	0	2375	0	2375
TCGA-AA-3662-01	Tumor	15	Female	80	Sigmoid Colon	T4N2M1	0	184	0	184	NA	NA	0	184
TCGA-AA-3662-11	Control	15	Female	80	Sigmoid Colon	T4N2M1	0	184	0	184	NA	NA	0	184
TCGA-AA-3663-01	Tumor	16	Male	42	Cecum	T3N0M0	0	212	0	212	0	212	0	212
TCGA-AA-3663-11	Control	16	Male	42	Cecum	T3N0M0	0	212	0	212	0	212	0	212
TCGA-AA-3675-01	Tumor	NA	Male	84	Hepatic Flexure	T3N0M0	0	1431	0	1431	0	1431	0	1431
TCGA-AA-3685-01	Tumor	NA	Male	69	Sigmoid Colon	T3N0M0	0	1127	0	1127	0	1127	0	1127
TCGA-AA-3697-01	Tumor	17	Male	77	Sigmoid Colon	T3N0M0	0	2587	0	2587	NA	NA	0	2587
TCGA-AA-3697-11	Control	17	Male	77	Sigmoid Colon	T3N0M0	0	2587	0	2587	NA	NA	0	2587
TCGA-AA-3712-01	Tumor	18	Male	65	Descending Colon	T3N2M0	0	0	0	0	NA	NA	0	0
TCGA-AA-3712-11	Control	18	Male	65	Descending Colon	T3N2M0	0	0	0	0	NA	NA	0	0
TCGA-AA-3713-01	Tumor	19	Male	68	Ascending Colon	T3N0M1	0	579	0	579	NA	NA	0	579
TCGA-AA-3713-11	Control	19	Male	68	Ascending Colon	T3N0M1	0	579	0	579	NA	NA	0	579
TCGA-AA-A01P-01	Tumor	NA	Female	80	Ascending Colon	T3N1M0	1	1158	1	1158	NA	NA	1	762
TCGA-AA-A01X-01	Tumor	NA	Female	80	Sigmoid Colon	T2N1M0	0	791	0	791	NA	NA	1	791
TCGA-AA-A01Z-01	Tumor	NA	Male	68	Ascending Colon	T3N0M0	0	1126	0	1126	NA	NA	1	1126
TCGA-AA-A02K-01	Tumor	NA	Male	50	Ascending Colon	T4N2M1	1	426	1	426	NA	NA	1	306
TCGA-AA-A02Y-01	Tumor	NA	Male	73	Cecum	T2N0M0	0	1216	0	1216	0	1216	0	1216
TCGA-AD-5900-01	Tumor	NA	Male	67	Ascending Colon	T2N0MX	0	370	0	370	0	370	0	370
TCGA-AD-6548-01	Tumor	NA	Female	81	Splenic Flexure	T2N0M0	0	650	0	650	0	650	0	650
TCGA-AD-6888-01	Tumor	NA	Male	73	Hepatic Flexure	T3N1bM0	1	472	1	472	1	343	1	343
TCGA-AD-6889-01	Tumor	NA	Male	76	Ascending Colon	T3N0M0	1	2532	0	2532	1	1516	1	1516
TCGA-AD-6895-01	Tumor	NA	Male	84	Cecum	T3N1aM0	0	763	0	763	0	763	0	763
TCGA-AD-6899-01	Tumor	NA	Male	84	Cecum	T4aN2bMX	1	176	0	176	0	176	0	176
TCGA-AD-6901-01	Tumor	NA	Male	78	Cecum	T3N0MX	1	682	1	682	1	468	1	468
TCGA-AD-6963-01	Tumor	NA	Male	58	Ascending Colon	T3N0MX	0	834	0	834	0	834	0	834
TCGA-AD-6964-01	Tumor	NA	Male	58	Cecum	T4aN2b	1	331	1	331	NA	NA	1	325
TCGA-AD-6965-01	Tumor	NA	Male	62	Cecum	T4aN2bM0	0	805	0	805	1	648	1	648
TCGA-AD-A5EJ-01	Tumor	NA	Female	74	Cecum	T3N0MX	0	0	0	0	NA	NA	0	0
TCGA-AD-A5EK-01	Tumor	NA	Male	51	Ascending Colon	T2N0MX	0	500	0	500	0	500	0	500
TCGA-AM-5820-01	Tumor	NA	Female	59	Sigmoid Colon	T4aN2M1	0	14	0	14	NA	NA	0	14
TCGA-AM-5821-01	Tumor	NA	Female	68	Sigmoid Colon	T3N0M0	0	28	0	28	NA	NA	0	28
TCGA-AU-3779-01	Tumor	NA	Female	80	Rectosigmoid Junction	T3N0M0	0	441	0	441	NA	NA	0	441
TCGA-AU-6004-01	Tumor	NA	Female	69	Cecum	T2N0M0	0	824	0	824	NA	NA	0	824
TCGA-AY-5543-01	Tumor	NA	Female	65	Ascending Colon	T3N1aM1	0	1004	0	1004	NA	NA	0	1004
TCGA-AY-6196-01	Tumor	NA	Male	47	Cecum	T3N2b	0	6	0	6	NA	NA	0	6
TCGA-AY-6197-01	Tumor	NA	Male	60	Cecum	T3N0	0	652	0	652	0	652	0	652
TCGA-AY-6386-01	Tumor	NA	Female	66	Cecum	T3N1aM0	0	542	0	542	0	542	0	542
TCGA-AY-A54L-01	Tumor	NA	Female	74	Transverse Colon	T2N0M0	0	525	0	525	1	396	1	396
TCGA-AY-A69D-01	Tumor	NA	Female	55	Transverse Colon	T3N0M0	0	543	0	543	0	543	0	543
TCGA-AY-A71X-01	Tumor	NA	Female	54	Cecum	T2N0M0	0	588	0	588	0	588	0	588
TCGA-AY-A8YK-01	Tumor	NA	Male	44	Sigmoid Colon	T3N2aM1	0	573	0	573	NA	NA	0	573
TCGA-AZ-4315-01	Tumor	NA	Male	61	Cecum	T3N0M0	0	1776	0	1776	NA	NA	0	1776
TCGA-AZ-4323-01	Tumor	NA	Male	37	Cecum	T4N2M1	1	43	1	43	NA	NA	1	43
TCGA-AZ-4614-01	Tumor	NA	Female	71		T4aN1M1	1	172	1	172	NA	NA	1	172
TCGA-AZ-4615-01	Tumor	NA	Male	84		T3N1M0	0	1002	0	1002	NA	NA	1	688
TCGA-AZ-4616-01	Tumor	NA	Female	82	Cecum	T3N2M1	1	156	1	156	NA	NA	1	156
TCGA-AZ-4682-01	Tumor	NA	Male	61	Sigmoid Colon	T3N0M1	1	680	1	680	NA	NA	1	680
TCGA-AZ-4684-01	Tumor	NA	Male	49		T3N2M1	0	1977	0	1977	NA	NA	1	411
TCGA-AZ-5403-01	Tumor	NA	Male	43	Sigmoid Colon	T3N0MX	1	1910	1	1910	NA	NA	1	304
TCGA-AZ-6598-01	Tumor	20	Female	77	[Discrepancy]	T3N0MX	1	1503	0	1503	0	1503	0	1503
TCGA-AZ-6598-11	Control	20	Female	77	[Discrepancy]	T3N0MX	1	1503	0	1503	0	1503	0	1503
TCGA-AZ-6599-01	Tumor	21	Male	72	Cecum	T2N0MX	1	206	0	206	0	206	0	206
TCGA-AZ-6599-11	Control	21	Male	72	Cecum	T2N0MX	1	206	0	206	0	206	0	206
TCGA-AZ-6600-01	Tumor	22	Male	64	Hepatic Flexure	T4N1M1	1	368	1	368	NA	NA	1	368
TCGA-AZ-6600-11	Control	22	Male	64	Hepatic Flexure	T4N1M1	1	368	1	368	NA	NA	1	368
TCGA-AZ-6601-01	Tumor	23	Male	68	Sigmoid Colon	T3N0M0	1	3042	1	3042	NA	NA	1	2270
TCGA-AZ-6601-11	Control	23	Male	68	Sigmoid Colon	T3N0M0	1	3042	1	3042	NA	NA	1	2270
TCGA-AZ-6603-01	Tumor	24	Female	77	Sigmoid Colon	T2N1MX	1	899	0	899	0	899	0	899
TCGA-AZ-6603-11	Control	24	Female	77	Sigmoid Colon	T2N1MX	1	899	0	899	0	899	0	899
TCGA-AZ-6605-01	Tumor	25	Male	77	Ascending Colon	T4N1M0	1	159	0	159	NA	NA	0	159
TCGA-AZ-6605-11	Control	25	Male	77	Ascending Colon	T4N1M0	1	159	0	159	NA	NA	0	159
TCGA-AZ-6606-01	Tumor	NA	Male	81	Cecum	T4N2M1	1	357	1	357	NA	NA	1	357
TCGA-AZ-6607-01	Tumor	NA	Male	69	Sigmoid Colon	T4N2M1	1	97	1	97	NA	NA	1	97
TCGA-AZ-6608-01	Tumor	NA	Female	55	Sigmoid Colon	T2N1M0	1	59	NA	59	NA	NA	0	59
TCGA-CA-5254-01	Tumor	NA	Female	42	Transverse Colon	T3N0M0	0	386	0	386	0	386	0	386
TCGA-CA-5255-01	Tumor	NA	Male	45	Ascending Colon	T3N0M0	0	376	0	376	0	376	0	376
TCGA-CA-5256-01	Tumor	NA	Female	54	Hepatic Flexure	T3N0M0	0	379	0	379	0	379	0	379
TCGA-CA-5796-01	Tumor	NA	Female	52	Ascending Colon	T3N0M0	0	377	0	377	0	377	0	377
TCGA-CA-5797-01	Tumor	NA	Male	56	Sigmoid Colon	T3N0M0	0	383	0	383	0	383	0	383
TCGA-CA-6715-01	Tumor	NA	Male	63	Sigmoid Colon	T3N1M0	0	383	0	383	0	383	0	383
TCGA-CA-6716-01	Tumor	NA	Male	65	Ascending Colon	T3N0M0	0	371	0	371	0	371	0	371
TCGA-CA-6717-01	Tumor	NA	Male	57	Ascending Colon	T3N0M0	0	388	0	388	0	388	0	388
TCGA-CA-6718-01	Tumor	NA	Male	46	Ascending Colon	T3N0M0	1	306	1	306	1	207	1	207
TCGA-CA-6719-01	Tumor	NA	Male	77	Descending Colon	T3N0M0	0	435	0	435	NA	NA	1	354
TCGA-CK-4947-01	Tumor	NA	Female	46	Sigmoid Colon	T4N1M0	0	534	0	534	NA	NA	1	21
TCGA-CK-4948-01	Tumor	NA	Female	45	Sigmoid Colon	T3N1M0	0	4502	0	4502	0	4502	0	4502
TCGA-CK-4950-01	Tumor	NA	Female	68	Cecum	T3N1M0	0	2599	0	2599	0	2599	0	2599
TCGA-CK-4951-01	Tumor	NA	Female	79	Ascending Colon	T3N0M0	1	2134	0	2134	NA	NA	1	480
TCGA-CK-4952-01	Tumor	NA	Female	48	Ascending Colon	T4N2M0	0	475	0	475	NA	NA	0	475
TCGA-CK-5912-01	Tumor	NA	Male	81	Cecum	T2N0MX	1	1493	0	1493	0	1493	0	1493
TCGA-CK-5913-01	Tumor	NA	Female	58	Cecum	T3N0MX	0	1561	0	1561	0	1561	0	1561
TCGA-CK-5914-01	Tumor	NA	Male	81	Sigmoid Colon	T3N1MX	0	669	0	669	NA	NA	0	669
TCGA-CK-5915-01	Tumor	NA	Male	63	Sigmoid Colon	T2N0MX	0	0	0	0	NA	NA	0	0
TCGA-CK-6746-01	Tumor	NA	Female	84	Cecum	T4bN0MX	0	0	0	0	NA	NA	0	0
TCGA-CK-6747-01	Tumor	NA	Female	87	Cecum	T3N0MX	0	2523	0	2523	0	2523	0	2523
TCGA-CK-6748-01	Tumor	NA	Female	45	Sigmoid Colon	T3N1M1	0	61	0	61	NA	NA	0	61
TCGA-CK-6751-01	Tumor	NA	Female	88	Ascending Colon	T2N0MX	0	3780	0	3780	NA	NA	0	3780
TCGA-CM-4743-01	Tumor	NA	Male	69	Hepatic Flexure	T3N0M0	0	701	0	701	0	701	0	701
TCGA-CM-4744-01	Tumor	NA	Male	69	Cecum	T2N0M0	0	609	0	609	0	609	0	609
TCGA-CM-4747-01	Tumor	NA	Male	47	Cecum	T4aN1bM1a	0	761	0	761	NA	NA	0	761
TCGA-CM-4751-01	Tumor	NA	Male	62	Cecum	T3N1bM0	0	822	0	822	0	822	0	822
TCGA-CM-5344-01	Tumor	NA	Female	39	Sigmoid Colon	T3N1bM0	0	670	0	670	NA	NA	0	670
TCGA-CM-5348-01	Tumor	NA	Male	72	Cecum	T3N1aM0	0	699	0	699	NA	NA	0	699
TCGA-CM-5349-01	Tumor	NA	Female	68	Cecum	T3N0M0	0	915	0	915	NA	NA	0	915
TCGA-CM-5860-01	Tumor	NA	Male	44	Ascending Colon	T3N0M0	0	974	0	974	NA	NA	0	974
TCGA-CM-5861-01	Tumor	NA	Female	63	Cecum	T3N0M0	0	457	0	457	NA	NA	1	335
TCGA-CM-5862-01	Tumor	NA	Male	80	Ascending Colon	T3N1aM1a	1	153	1	153	NA	NA	1	31
TCGA-CM-5863-01	Tumor	NA	Female	60	Ascending Colon	T3N1bM0	0	457	0	457	NA	NA	0	457
TCGA-CM-5864-01	Tumor	NA	Male	60	Cecum	T2N0M0	0	457	0	457	NA	NA	0	457
TCGA-CM-5868-01	Tumor	NA	Female	59	Sigmoid Colon	T4aN1aM1a	0	518	0	518	NA	NA	0	518
TCGA-CM-6161-01	Tumor	NA	Female	36	Sigmoid Colon	T2N0M0	0	457	0	457	NA	NA	0	457
TCGA-CM-6162-01	Tumor	NA	Female	48	Ascending Colon	T3N1aM0	0	365	0	365	NA	NA	0	365
TCGA-CM-6164-01	Tumor	NA	Female	46	Sigmoid Colon	T3N0M0	0	883	0	883	NA	NA	0	883
TCGA-CM-6165-01	Tumor	NA	Male	74	Sigmoid Colon	T3N0M0	0	488	0	488	NA	NA	0	488
TCGA-CM-6166-01	Tumor	NA	Female	48	Ascending Colon	T2N0M0	0	669	0	669	NA	NA	0	669
TCGA-CM-6167-01	Tumor	NA	Female	57	Cecum	T3N2bM0	0	456	0	456	NA	NA	0	456
TCGA-CM-6168-01	Tumor	NA	Female	84	Ascending Colon	T3N0M0	0	395	0	395	NA	NA	0	395
TCGA-CM-6169-01	Tumor	NA	Male	67	Cecum	T3N0M0	0	396	0	396	NA	NA	0	396
TCGA-CM-6170-01	Tumor	NA	Female	73	Descending Colon	T2N0M0	0	457	0	457	NA	NA	0	457
TCGA-CM-6171-01	Tumor	NA	Female	77	Ascending Colon	T2N0M0	0	427	0	427	NA	NA	0	427
TCGA-CM-6172-01	Tumor	NA	Female	70	Sigmoid Colon	T3N1aM0	0	335	0	335	NA	NA	0	335
TCGA-CM-6674-01	Tumor	NA	Male	39	Hepatic Flexure	T3N0M0	0	394	0	394	NA	NA	0	394
TCGA-CM-6675-01	Tumor	NA	Male	35	Cecum	T3N2bM1b	0	397	0	397	NA	NA	1	337
TCGA-CM-6676-01	Tumor	NA	Male	82	Sigmoid Colon	T2N0M0	0	337	0	337	NA	NA	0	337
TCGA-CM-6677-01	Tumor	NA	Female	75	Hepatic Flexure	T3N0M0	0	337	0	337	NA	NA	0	337
TCGA-CM-6678-01	Tumor	NA	Female	63	Sigmoid Colon	T4aN1cM1a	0	335	0	335	NA	NA	1	0
TCGA-CM-6679-01	Tumor	NA	Male	58	Sigmoid Colon	T3N0M0	0	306	0	306	NA	NA	0	306
TCGA-CM-6680-01	Tumor	NA	Female	78	Cecum	T3N2aM0	0	366	0	366	NA	NA	0	366
TCGA-D5-5537-01	Tumor	NA	Male	83	Ascending Colon	T3N2MX	1	1381	1	1381	1	722	1	722
TCGA-D5-5538-01	Tumor	NA	Female	60	Cecum	T3N1bM0	1	1661	1	1661	NA	NA	1	1007
TCGA-D5-5539-01	Tumor	NA	Male	60	Ascending Colon	T3N1M0	0	596	0	596	NA	NA	1	579
TCGA-D5-5540-01	Tumor	NA	Male	73	Cecum	T3N0M0	0	1706	0	1706	0	1706	0	1706
TCGA-D5-5541-01	Tumor	NA	Male	63	Sigmoid Colon	T3N1aM0	0	1701	0	1701	0	1701	0	1701
TCGA-D5-6529-01	Tumor	NA	Male	69	[Discrepancy]	T3N0M0	0	614	0	614	NA	NA	1	386
TCGA-D5-6530-01	Tumor	NA	Male	53	[Discrepancy]	T2N0M0	0	621	0	621	NA	NA	0	621
TCGA-D5-6531-01	Tumor	NA	Male	75	Hepatic Flexure	T3N0M0	0	540	0	540	NA	NA	0	540
TCGA-D5-6532-01	Tumor	NA	Male	61	Sigmoid Colon	T3N0M0	0	555	0	555	NA	NA	0	555
TCGA-D5-6533-01	Tumor	NA	Female	68	Transverse Colon	T4bN0M0	0	775	0	775	0	775	0	775
TCGA-D5-6534-01	Tumor	NA	Female	62	Ascending Colon	T3N0M0	0	1316	0	1316	0	1316	0	1316
TCGA-D5-6535-01	Tumor	NA	Female	80	Ascending Colon	T3N1MX	0	460	0	460	NA	NA	0	460
TCGA-D5-6536-01	Tumor	NA	Male	73	Sigmoid Colon	T3N0M0	0	543	0	543	NA	NA	1	493
TCGA-D5-6537-01	Tumor	NA	Male	64	Transverse Colon	T3N1aMX	1	146	1	146	NA	NA	1	123
TCGA-D5-6538-01	Tumor	NA	Female	79	Hepatic Flexure	T3N2M0	0	521	0	521	NA	NA	0	521
TCGA-D5-6539-01	Tumor	NA	Female	45	Transverse Colon	T3N0M0	0	380	0	380	NA	NA	0	380
TCGA-D5-6540-01	Tumor	NA	Male	66	Cecum	T2N0M0	0	491	0	491	NA	NA	0	491
TCGA-D5-6898-01	Tumor	NA	Female	51	Sigmoid Colon	T2N0M0	0	229	0	229	NA	NA	0	229
TCGA-D5-6920-01	Tumor	NA	Female	77	Sigmoid Colon	T3N0M0	0	377	0	377	NA	NA	0	377
TCGA-D5-6922-01	Tumor	NA	Male	76	Sigmoid Colon	T3N1M0	0	308	0	308	NA	NA	0	308
TCGA-D5-6923-01	Tumor	NA	Male	57	Sigmoid Colon	T2N0M0	0	378	0	378	NA	NA	0	378
TCGA-D5-6924-01	Tumor	NA	Male	68	Sigmoid Colon	T3N0M0	0	435	0	435	NA	NA	0	435
TCGA-D5-6926-01	Tumor	NA	Male	65	Sigmoid Colon	T4aN1M0	0	275	0	275	NA	NA	0	275
TCGA-D5-6927-01	Tumor	NA	Male	34	Transverse Colon	T3N0M0	0	287	0	287	NA	NA	0	287
TCGA-D5-6928-01	Tumor	NA	Male	80	Ascending Colon	T3N0M0	0	354	0	354	NA	NA	0	354
TCGA-D5-6929-01	Tumor	NA	Female	49	Sigmoid Colon	T3N1M1	0	408	0	408	NA	NA	0	408
TCGA-D5-6930-01	Tumor	NA	Male	67	Ascending Colon	T3N0M0	0	406	0	406	NA	NA	0	406
TCGA-D5-6931-01	Tumor	NA	Male	77	Transverse Colon	T4bN2M0	0	365	0	365	NA	NA	0	365
TCGA-D5-6932-01	Tumor	NA	Male	69	Transverse Colon	T3N0M0	0	346	0	346	NA	NA	0	346
TCGA-D5-7000-01	Tumor	NA	Female	79	Cecum	T2N0M0	0	312	0	312	NA	NA	0	312
TCGA-DM-A0X9-01	Tumor	NA	Female	71	[Discrepancy]	T3N0M0	0	3641	0	3641	NA	NA	0	3641
TCGA-DM-A0XD-01	Tumor	NA	Male	65	[Discrepancy]	T3N0M0	1	743	NA	743	NA	NA	1	484
TCGA-DM-A0XF-01	Tumor	NA	Female	68	[Discrepancy]	T3N2M0	1	1162	NA	1162	NA	NA	0	1162
TCGA-DM-A1D0-01	Tumor	NA	Female	79	Sigmoid Colon	T3N0M0	0	3974	0	3974	NA	NA	0	3974
TCGA-DM-A1D4-01	Tumor	NA	Male	80	Cecum	T3N0M0	1	2821	NA	2821	NA	NA	1	1920
TCGA-DM-A1D7-01	Tumor	NA	Male	82	Sigmoid Colon	T3N0M0	1	405	NA	405	NA	NA	1	80
TCGA-DM-A1D8-01	Tumor	NA	Female	50	Ascending Colon	T3N1	1	383	NA	383	NA	NA	0	383
TCGA-DM-A1D9-01	Tumor	NA	Female	67	Cecum	T3N0M0	0	4270	0	4270	NA	NA	0	4270
TCGA-DM-A1DA-01	Tumor	NA	Female	71	Cecum	T3N2M0	1	228	NA	228	NA	NA	0	228
TCGA-DM-A1DB-01	Tumor	NA	Male	68	Sigmoid Colon	T3N0M0	1	1348	NA	1348	NA	NA	0	1348
TCGA-DM-A1HA-01	Tumor	NA	Male	82	Ascending Colon	T3N2M0	0	4000	0	4000	NA	NA	0	4000
TCGA-DM-A1HB-01	Tumor	NA	Male	75	Transverse Colon	T3N1M0	0	4126	0	4126	NA	NA	0	4126
TCGA-DM-A280-01	Tumor	NA	Female	70	Ascending Colon	T3N0M0	1	236	NA	236	NA	NA	0	236
TCGA-DM-A282-01	Tumor	NA	Female	60	Hepatic Flexure	T3N0M0	0	4233	0	4233	NA	NA	0	4233
TCGA-DM-A285-01	Tumor	NA	Female	71	Ascending Colon	T3N2M1	1	179	NA	179	NA	NA	0	179
TCGA-DM-A288-01	Tumor	NA	Male	68	Cecum	T3N2M0	1	427	NA	427	NA	NA	1	320
TCGA-DM-A28A-01	Tumor	NA	Male	78	Cecum	T3N2M0	1	805	NA	805	NA	NA	0	805
TCGA-DM-A28C-01	Tumor	NA	Male	74	Sigmoid Colon	T3N0M0	1	2475	NA	2475	NA	NA	1	1929
TCGA-DM-A28E-01	Tumor	NA	Female	72	Sigmoid Colon	T3N0M0	0	3648	0	3648	NA	NA	0	3648
TCGA-DM-A28F-01	Tumor	NA	Male	73	Sigmoid Colon	T3N1M0	1	1094	NA	1094	NA	NA	0	1094
TCGA-DM-A28G-01	Tumor	NA	Male	75	Ascending Colon	T3N0M0	1	1849	NA	1849	NA	NA	0	1849
TCGA-DM-A28H-01	Tumor	NA	Male	50	Cecum	T3N2M0	0	3561	0	3561	NA	NA	1	484
TCGA-DM-A28K-01	Tumor	NA	Male	75	Hepatic Flexure	T3N0M0	0	2988	0	2988	NA	NA	0	2988
TCGA-DM-A28M-01	Tumor	NA	Male	63	Descending Colon	T3N0M0	0	2895	0	2895	NA	NA	0	2895
TCGA-F4-6459-01	Tumor	NA	Female	61	Sigmoid Colon	T3N2aM0	1	262	0	262	NA	NA	0	262
TCGA-F4-6460-01	Tumor	NA	Female	51	Sigmoid Colon	T3N1M0	1	972	1	972	1	313	1	313
TCGA-F4-6461-01	Tumor	NA	Female	41	Hepatic Flexure	T4bN2M0	1	338	1	338	NA	NA	1	288
TCGA-F4-6463-01	Tumor	NA	Male	51	Transverse Colon	T3N0M0	0	1087	0	1087	0	1087	0	1087
TCGA-F4-6569-01	Tumor	NA	Male	60	Transverse Colon	T2N0M0	0	1087	0	1087	0	1087	0	1087
TCGA-F4-6570-01	Tumor	NA	Female	78	Transverse Colon	T3N0M0	1	188	0	188	NA	NA	0	188
TCGA-F4-6703-01	Tumor	NA	Male	64	Ascending Colon	T3N0M0	0	1456	0	1456	0	1456	0	1456
TCGA-F4-6704-01	Tumor	26	Male	60	Sigmoid Colon	T3N2bMX	0	47	0	47	NA	NA	0	47
TCGA-F4-6704-11	Control	26	Male	60	Sigmoid Colon	T3N2bMX	0	47	0	47	NA	NA	0	47
TCGA-F4-6805-01	Tumor	NA	Female	58	Descending Colon	T3N0M0	0	1047	0	1047	0	1047	0	1047
TCGA-F4-6806-01	Tumor	NA	Female	59	Sigmoid Colon	T2N0M0	0	1260	0	1260	1	336	1	336
TCGA-F4-6807-01	Tumor	NA	Female	51	Hepatic Flexure	T3N2bM0	0	1309	0	1309	0	1309	0	1309
TCGA-F4-6809-01	Tumor	NA	Female	52	Sigmoid Colon	T3N1M1	1	403	1	403	NA	NA	1	403
TCGA-F4-6854-01	Tumor	NA	Female	77	Sigmoid Colon	T3N0M0	0	16	0	16	0	16	0	16
TCGA-F4-6855-01	Tumor	NA	Female	70	Sigmoid Colon	T3N0M0	0	1442	0	1442	0	1442	0	1442
TCGA-F4-6856-01	Tumor	NA	Male	45	Cecum	T2N0M0	0	1074	0	1074	0	1074	0	1074
TCGA-G4-6293-01	Tumor	NA	Female	49	Transverse Colon	T3N1M0	0	4051	0	4051	0	4051	0	4051
TCGA-G4-6294-01	Tumor	NA	Male	75	Cecum	T3N1M1	1	858	1	858	NA	NA	1	517
TCGA-G4-6295-01	Tumor	NA	Female	70	Cecum	T3N0M0	0	254	0	254	NA	NA	0	254
TCGA-G4-6297-01	Tumor	NA	Female	55	Cecum	T3N2M1	0	2506	0	2506	NA	NA	1	439
TCGA-G4-6298-01	Tumor	NA	Male	90	Cecum	T4aN1MX	1	715	1	715	NA	NA	1	291
TCGA-G4-6299-01	Tumor	NA	Male	69	Descending Colon	T3N2M0	0	2268	0	2268	NA	NA	0	2268
TCGA-G4-6302-01	Tumor	NA	Female	90	Cecum	T3N0M0	1	2047	0	2047	NA	NA	0	2047
TCGA-G4-6303-01	Tumor	NA	Female	54	Sigmoid Colon	T3N1M1	1	2003	1	2003	NA	NA	1	872
TCGA-G4-6304-01	Tumor	NA	Female	66	Transverse Colon	T4N0M0	0	1631	0	1631	NA	NA	1	859
TCGA-G4-6306-01	Tumor	NA	Male	71	Ascending Colon	T2N0M0	0	1359	0	1359	NA	NA	0	1359
TCGA-G4-6307-01	Tumor	NA	Female	37	Sigmoid Colon	T3N1M0	0	1674	0	1674	NA	NA	0	1674
TCGA-G4-6309-01	Tumor	NA	Female	40	Sigmoid Colon	T3N1M0	0	2600	0	2600	1	2176	1	2176
TCGA-G4-6310-01	Tumor	NA	Male	69	Cecum	T3N1M0	0	1935	0	1935	0	1935	0	1935
TCGA-G4-6311-01	Tumor	NA	Male	80	Ascending Colon	T3N1MX	0	1199	0	1199	NA	NA	0	1199
TCGA-G4-6314-01	Tumor	NA	Female	76	Cecum	T3N2M1	0	1093	0	1093	NA	NA	1	38
TCGA-G4-6315-01	Tumor	NA	Male	66	Descending Colon	T3N1M1	0	1883	0	1883	NA	NA	0	1883
TCGA-G4-6317-01	Tumor	NA	Female	51	Sigmoid Colon	T3N2MX	0	1095	0	1095	NA	NA	1	592
TCGA-G4-6320-01	Tumor	NA	Male	73	Hepatic Flexure	T3N1MX	0	804	0	804	NA	NA	0	804
TCGA-G4-6321-01	Tumor	NA	Female	60	Cecum	T2N1MX	0	672	0	672	NA	NA	0	672
TCGA-G4-6322-01	Tumor	NA	Male	65	Descending Colon	T3N1MX	0	792	0	792	NA	NA	1	789
TCGA-G4-6586-01	Tumor	NA	Female	73	Ascending Colon	T3N0M0	0	1089	0	1089	NA	NA	0	1089
TCGA-G4-6588-01	Tumor	NA	Female	58	Cecum	T3N0M0	0	796	0	796	NA	NA	0	796
TCGA-G4-6625-01	Tumor	NA	Female	77	Sigmoid Colon	T3N0M0	0	2792	0	2792	NA	NA	1	2564
TCGA-G4-6626-01	Tumor	NA	Male	90	Ascending Colon	T3N0M0	1	1422	0	1422	NA	NA	0	1422
TCGA-G4-6627-01	Tumor	NA	Male	84	Ascending Colon	T3N0M0	0	2275	0	2275	1	1003	1	1003
TCGA-G4-6628-01	Tumor	NA	Male	78	Cecum	T2N0M0	0	2424	0	2424	0	2424	0	2424
TCGA-NH-A50T-01	Tumor	NA	Female	68	Splenic Flexure	T3N0MX	0	553	0	553	0	553	0	553
TCGA-NH-A50U-01	Tumor	NA	Male	42	Cecum	T4aN0M1a	1	334	1	334	NA	NA	1	276
TCGA-NH-A50V-01	Tumor	NA	Male	69	Cecum	T3N2aM0	0	588	0	588	0	588	0	588
TCGA-NH-A5IV-01	Tumor	NA	Female	90	Transverse Colon	T3N0MX	0	588	0	588	0	588	0	588
TCGA-NH-A6GA-01	Tumor	NA	Male	58	Ascending Colon	T4aN2aMX	1	302	1	302	NA	NA	1	6
TCGA-NH-A6GB-01	Tumor	NA	Female	71	Transverse Colon	T3N2bMX	0	476	0	476	NA	NA	0	476
TCGA-NH-A6GC-01	Tumor	NA	Female	66	Descending Colon	T4bN1bM1b	0	389	0	389	NA	NA	0	389
TCGA-NH-A8F7-01	Tumor	NA	Female	53	Sigmoid Colon	T3N0MX	0	543	0	543	NA	NA	0	543
TCGA-NH-A8F8-01	Tumor	NA	Male	79	Ascending Colon	T4aN2bM1	1	511	1	511	NA	NA	1	511
TCGA-QG-A5YV-01	Tumor	NA	Female	64	Sigmoid Colon	T4bN1aMX	0	1301	0	1301	0	1301	0	1301
TCGA-QG-A5YW-01	Tumor	NA	Female	55	Cecum	T3N2bMX	0	896	0	896	0	896	0	896
TCGA-QG-A5YX-01	Tumor	NA	Female	61	Sigmoid Colon	T3N0MX	0	1003	0	1003	0	1003	0	1003
TCGA-QG-A5Z1-01	Tumor	NA	Male	71	Sigmoid Colon	T3N1bMX	1	256	0	256	NA	NA	0	256
TCGA-QG-A5Z2-01	Tumor	NA	Male	61	Cecum	T2N0M0	0	952	0	952	0	952	0	952
TCGA-QL-A97D-01	Tumor	NA	Female	84	Cecum	T2N0MX	0	666	0	666	0	666	0	666
TCGA-RU-A8FL-01	Tumor	NA	Male	51	Cecum	T3N2aMX	0	1177	0	1177	NA	NA	1	256
TCGA-SS-A7HO-01	Tumor	NA	Female	44	Cecum	T4aN0M0	0	1829	0	1829	1	506	1	506
TCGA-T9-A92H-01	Tumor	NA	Male	82	Sigmoid Colon	T3N0M0	0	362	0	362	1	81	1	81
TCGA-WS-AB45-01	Tumor	NA	Female	52	Cecum	T3N0MX	0	2130	0	2130	0	2130	0	2130
