# Supplementary material
Source: Research Square preprint supplement (doi:10.21203/rs.3.rs-9763213/v1)
Supplement: Supplementary file 9 [file 7b196e50610f29bfde44814d.xlsx]

## Sheet: Peptides
Peptide	Modification	C01	M01	T01	C02	M02	T02	C03	M03	T03	C04	M04	T04	C05	M05	T05	C06	M06	T06	C07	M07	T07	C08	M08	T08	C09	M09	T09	C10	M10	T10	C11	M11	T11	C12	M12	T12	C13	M13	T13	C14	M14	T14	C15	M15	T15	C16	M16	T16
TKQTAR(H3_3_8)	H3_3_8 unmod	0.89741	0.890985	0.910709	0.897068	0.916883	0.925184	0.929348	0.974541	0.90919	0.926612	0.693315	0.924869	0.813746	0.933926	0.848149	0.932601	0.942417	0.930122	0.921315	0.914012	0.842218	0.943361	0.945682	0.894733	0.896822	0.920695	0.936423	0.890666	0.899181	0.904457	0.886149	0.911914	0.916606	0.922666	0.871581	0.84656	0.896936	0.861825	0.902858	0.879408	0.883569	0.938061	0.900011	0.910778	0.909199	0.905968	0.846918	0.915124
TKQTAR(H3_3_8)	H3_3_8 K4me1	0.101506	0.107959	0.0874735	0.101468	0.081873	0.0734865	0.067298	0.020627	0.0881575	0.073329	0.305284	0.0740205	0.18404	0.06547	0.139649	0.065991	0.055938	0.068407	0.076203	0.083118	0.156312	0.046314	0.052241	0.099585	0.099163	0.07608	0.058812	0.107763	0.099416	0.094841	0.112428	0.086917	0.078963	0.07661	0.126386	0.150067	0.098983	0.135316	0.096089	0.119892	0.115009	0.058861	0.099106	0.082824	0.0869935	0.092965	0.152588	0.0846265
TKQTAR(H3_3_8)	H3_3_8 K4me2	1.3e-05	0.000204	0.0001615	0.000753	0.000303	0.00014	9e-06	0.001089	4.9e-05	3e-06	0.000303	0.000858	2.2e-05	1.5e-05	0.00738	0.000252	1.1e-05	5.5e-05	6.7e-05	6.1e-05	9.75e-05	0.008936	0.000189	0.004219	0.001043	9e-05	0.001166	0.001308	0.000476	1.5e-06	0.000588	8.1e-05	9.8e-05	0.000157	0.000178	0.0021365	0.001513	2e-06	0.000347	0.000124	0.001214	0.000158	0.000189	7.2e-05	0.000369	8.3e-05	0	6.6e-05
TKQTAR(H3_3_8)	H3_3_8 K4me3	0	0	3.3e-05	1e-05	1.5e-05	5e-07	0	1.1e-05	0	0	1e-06	4.5e-06	0	3e-06	0.000141	0	1e-06	1e-06	1e-06	0	0	2.3e-05	0	0.0002945	0.002827	0	0	0	0	0	0	3e-06	0	1e-06	8.1e-05	2.55e-05	2e-06	0	1.6e-05	0	0	2e-06	7e-06	5e-06	2.95e-05	1e-06	0	2e-06
TKQTAR(H3_3_8)	H3_3_8 K4ac	0.001071	0.000852	0.0016235	0.000701	0.000926	0.001189	0.003346	0.003733	0.0026035	5.6e-05	0.001098	0.000247	0.002192	0.000586	0.004681	0.001156	0.001632	0.0014145	0.002414	0.002808	0.001371	0.001366	0.001888	0.0011685	0.000145	0.003135	0.0035995	0.000262	0.000926	0.0007	0.000835	0.001085	0.004333	0.000566	0.001774	0.0012115	0.002566	0.002857	0.00069	0.000576	0.000208	0.002918	0.000688	0.006321	0.0034095	0.000982	0.000494	0.0001815
KSTGGKAPR(H3_9_17)	H3_9_17 unmod	0.189554	0.288125	0.244951	0.31199	0.276374	0.255466	0.325311	0.22532	0.240288	0.279001	0.244902	0.237152	0.269959	0.436465	0.202669	0.251026	0.261245	0.267128	0.318627	0.319878	0.276993	0.205937	0.346395	0.200849	0.213155	0.280892	0.233532	0.372035	0.151543	0.263155	0.308715	0.303591	0.201909	0.239126	0.316842	0.267637	0.285776	0.303631	0.293494	0.239684	0.273881	0.196217	0.233211	0.239142	0.235039	0.278898	0.238373	0.291039
KSTGGKAPR(H3_9_17)	H3_9_17 K9me1	0.127412	0.150844	0.139691	0.112233	0.123548	0.168171	0.135165	0.165481	0.132446	0.10794	0.13075	0.129526	0.129871	0.128587	0.124574	0.144482	0.139475	0.091812	0.124632	0.115337	0.164856	0.0643	0.103374	0.0989235	0.111585	0.155383	0.096496	0.198501	0.085828	0.14706	0.177686	0.14957	0.122898	0.112437	0.158346	0.130873	0.13169	0.162104	0.117383	0.133648	0.131835	0.106246	0.152388	0.156577	0.148784	0.177604	0.165493	0.142295
KSTGGKAPR(H3_9_17)	H3_9_17 K9me2	0.209721	0.20539	0.187191	0.192681	0.197013	0.236649	0.170298	0.252742	0.215969	0.199016	0.217194	0.210963	0.216275	0.120943	0.212517	0.179061	0.20655	0.270199	0.099332	0.25041	0.215867	0.159834	0.184905	0.227287	0.192191	0.140379	0.264224	0.114303	0.260135	0.234109	0.137908	0.197883	0.288635	0.129694	0.114242	0.2024	0.201834	0.193839	0.188049	0.213408	0.174493	0.316632	0.185373	0.213196	0.236814	0.134172	0.206968	0.1933
KSTGGKAPR(H3_9_17)	H3_9_17 K9me3	0.091232	0.076097	0.125084	0.084647	0.10001	0.083254	0.047915	0.099214	0.136888	0.115923	0.105133	0.149607	0.060192	0.057422	0.192152	0.159854	0.120327	0.066901	0.037521	0.057987	0.091912	0.172129	0.077645	0.199579	0.152047	0.173854	0.119304	0.054279	0.101119	0.103044	0.051146	0.070178	0.153044	0.083726	0.092369	0.114852	0.061823	0.052769	0.108915	0.108108	0.157645	0.123165	0.097635	0.082873	0.106373	0.073652	0.043212	0.0849205
KSTGGKAPR(H3_9_17)	H3_9_17 K9ac	0.045667	0.027194	0.0087835	0.018339	0.016706	0.011999	0.050983	0.009599	0.012491	0.022509	0.033567	0.0050605	0.063468	0.01654	0.0147845	0.008	0.014964	0.0120275	0.021672	0.005181	0.004463	0.079778	0.04828	0.018666	0.041577	0.043823	0.017138	0.007695	0.004364	0.0131685	0.055479	0.027413	0.0096135	0.008303	0.006446	0.025585	0.012566	0.013356	0.018448	0.024137	0.007954	0.017374	0.014291	0.013186	0.0132135	0.017863	0.013262	0.0124005
KSTGGKAPR(H3_9_17)	H3_9_17 K14ac	0.119005	0.071992	0.089757	0.090599	0.08675	0.0805825	0.067876	0.078977	0.076534	0.082143	0.075267	0.081842	0.071291	0.091127	0.0733545	0.097117	0.090949	0.077435	0.117095	0.124156	0.08533	0.105343	0.054388	0.0412625	0.088564	0.054421	0.080291	0.103054	0.07619	0.0863615	0.090892	0.09291	0.045887	0.149754	0.132422	0.075602	0.093316	0.099213	0.062896	0.093753	0.085968	0.049	0.11262	0.093876	0.091161	0.1079	0.11913	0.091158
KSTGGKAPR(H3_9_17)	H3_9_17 K9me1K14ac	0.077428	0.064293	0.080128	0.063506	0.069056	0.058376	0.076482	0.074341	0.0577435	0.073679	0.067869	0.061354	0.074784	0.060537	0.0560265	0.078663	0.064656	0.0568695	0.065891	0.061975	0.0722505	0.112122	0.05778	0.046051	0.059048	0.060938	0.0696035	0.080483	0.071153	0.06175	0.07258	0.074667	0.0388575	0.092866	0.076229	0.0697475	0.074516	0.084145	0.067311	0.079008	0.057182	0.053179	0.072704	0.074728	0.059891	0.082113	0.069493	0.067193
KSTGGKAPR(H3_9_17)	H3_9_17 K9me2K14ac	0.096962	0.079839	0.0847615	0.079529	0.081422	0.0672615	0.101942	0.06163	0.0851205	0.08743	0.091203	0.0811725	0.084596	0.039124	0.0744815	0.059017	0.076527	0.100958	0.077577	0.049906	0.059272	0.059277	0.09603	0.115132	0.102544	0.06758	0.08411	0.050991	0.132053	0.06082	0.081526	0.055841	0.082669	0.121136	0.072657	0.082744	0.099321	0.070311	0.095229	0.074722	0.072335	0.092089	0.091221	0.078989	0.072852	0.093543	0.099626	0.082774
KSTGGKAPR(H3_9_17)	H3_9_17 K9me3K14ac	0.038594	0.03195	0.0355075	0.039786	0.043307	0.0297975	0.019657	0.026799	0.0368645	0.029189	0.031831	0.039534	0.022877	0.043389	0.044496	0.020252	0.020738	0.05202	0.133395	0.011647	0.0231795	0.033755	0.027099	0.0450695	0.035314	0.020678	0.0253615	0.015631	0.114544	0.027237	0.020959	0.019982	0.0513835	0.055539	0.024659	0.0273205	0.035139	0.015635	0.042294	0.028225	0.033846	0.04266	0.034113	0.041481	0.029032	0.030921	0.034278	0.029705
KSTGGKAPR(H3_9_17)	H3_9_17 K9acK14ac	0.004425	0.004274	0.004147	0.00669	0.005814	0.008444	0.004371	0.005897	0.005655	0.003171	0.002285	0.0037885	0.006686	0.005865	0.004946	0.002528	0.004569	0.0046505	0.004257	0.003523	0.005878	0.007525	0.004103	0.0071815	0.003975	0.002052	0.0099395	0.003028	0.00307	0.003295	0.003109	0.007963	0.005102	0.00742	0.005788	0.003239	0.00402	0.004996	0.005982	0.005307	0.00486	0.003438	0.006444	0.005953	0.006841	0.003335	0.010165	0.0052125
KQLATKAAR(H3_18_26)	H3_18_26 unmod	0.758415	0.760403	0.735601	0.703185	0.773163	0.743319	0.767422	0.693898	0.74491	0.719912	0.755735	0.722554	0.706918	0.701181	0.636166	0.731479	0.759425	0.721611	0.745977	0.727856	0.688167	0.746534	0.706702	0.774126	0.729496	0.781636	0.604496	0.728699	0.721323	0.702662	0.702582	0.67736	0.775049	0.656756	0.637876	0.741437	0.747918	0.723018	0.759509	0.697243	0.7631	0.712709	0.707846	0.695782	0.694932	0.762168	0.660173	0.685021
KQLATKAAR(H3_18_26)	H3_18_26 K23me1	0.001071	0.001219	6.65e-05	0.001006	0.000689	0.0003065	6.7e-05	0.000658	0.0003545	0.000334	0.000723	0.000503	3.8e-05	7.2e-05	9.05e-05	0.000557	0.000197	0.0007115	1.4e-05	1.4e-05	0.002283	1.8e-05	2e-05	0.0095835	0.002286	0.000874	0.002497	0.00076	1.2e-05	0.0003725	7.9e-05	0.001721	0.000537	0.000219	0.005609	0.0004005	0.000409	0.000455	0.000766	0.001347	0.001003	0.000109	4.1e-05	0.001581	0.0004235	0.000483	5.8e-05	0.0001595
KQLATKAAR(H3_18_26)	H3_18_26 K18me1	0.001562	0.001588	0.0016265	0.002159	0.001499	0.002279	0.000836	0.001464	0.001478	0.002557	0.002433	0.00144	0.002295	0.001209	0.0017385	0.00096	0.001472	0.002703	0.003135	0.001593	0.0034805	0.002608	0.001476	0.0026805	0.002011	0.001292	0.002054	0.001555	0.003458	0.002142	0.001524	0.004705	0.001616	0.003309	0.003994	0.00084	0.001987	0.002345	0.002148	0.003703	0.001865	0.000803	0.002426	0.003507	0.0024615	0.00131	0.005224	0.0006095
KQLATKAAR(H3_18_26)	H3_18_26 K18me1K23me1	5e-06	1e-05	3.25e-05	1e-06	2.8e-05	0.000312	0	4e-06	0.001544	3e-06	1e-06	0.0006515	0	2.2e-05	0.000257	9e-06	9e-06	0.0001845	2e-06	1e-06	7.15e-05	0	3e-06	0.005012	0	0	0.00348	1e-06	1e-06	7.5e-06	0	1.6e-05	0.0001935	0	5.9e-05	0.0002905	3e-06	6e-06	1.4e-05	2.2e-05	1e-06	7.6e-05	1.2e-05	1.6e-05	0.002875	1e-06	0	0.000339
KQLATKAAR(H3_18_26)	H3_18_26 K18ac	0.038537	0.073049	0.0443935	0.034144	0.119081	0.0332765	0.10533	0.077849	0.0636745	0.054409	0.083788	0.0517455	0.128601	0.101051	0.0611315	0.014725	0.056617	0.086294	0.046565	0.080697	0.053639	0.029041	0.158147	0.049551	0.055993	0.051864	0.053408	0.048344	0.075425	0.0768965	0.08641	0.016161	0.0301515	0.085368	0.067198	0.063684	0.051429	0.057177	0.056746	0.085753	0.034571	0.059846	0.085437	0.041945	0.0665175	0.032699	0.063421	0.0816745
KQLATKAAR(H3_18_26)	H3_18_26 K23ac	0.18997	0.150912	0.209156	0.247336	0.094882	0.208801	0.118298	0.215908	0.177351	0.211179	0.145567	0.215437	0.144052	0.186111	0.287594	0.242715	0.168474	0.180779	0.194149	0.181774	0.238203	0.21403	0.125037	0.14558	0.198411	0.158722	0.311483	0.213757	0.175699	0.211649	0.201384	0.29048	0.179868	0.231005	0.277573	0.181452	0.18565	0.206343	0.169114	0.199854	0.190576	0.217466	0.191255	0.243716	0.222158	0.190911	0.245449	0.220293
KQLATKAAR(H3_18_26)	H3_18_26 K18acK23ac	0.010439	0.012819	0.009123	0.012169	0.010659	0.011706	0.008046	0.010219	0.0106885	0.011605	0.011753	0.007669	0.018095	0.010355	0.0130225	0.009555	0.013806	0.0077175	0.010157	0.008065	0.014156	0.007768	0.008615	0.013469	0.011803	0.005612	0.022582	0.006884	0.024082	0.0062695	0.00802	0.009558	0.0125845	0.023343	0.00769	0.011895	0.012604	0.010656	0.011702	0.012078	0.008885	0.008992	0.012985	0.013453	0.0106325	0.012428	0.025676	0.0119045
KSAPATGGVKKPHR(H3_27_40)	H3_27_40 unmod	0.04729	0.040126	0.0349685	0.055118	0.047158	0.046723	0.035329	0.029128	0.0395175	0.062774	0.048987	0.026424	0.030263	0.023696	0.038406	0.024282	0.036833	0.02267	0.044019	0.05138	0.039771	0.064954	0.027565	0.027476	0.031172	0.026493	0.027312	0.061261	0.033921	0.023646	0.020839	0.027378	0.0176125	0.061127	0.01572	0.0536275	0.020399	0.086003	0.056329	0.038421	0.023346	0.005978	0.024326	0.016771	0.0150395	0.036042	0.061643	0.0334705
KSAPATGGVKKPHR(H3_27_40)	H3_27_40 K36me1	0.001624	0.00114	0.001409	0.000305	0.001482	0.0031835	0	0.00016	0.0086425	0.005918	0.008804	0.0064915	0.001404	0.000528	0.005032	0.00129	0.002071	0.000674	0.02019	0.020134	0.0117735	0.03509	0.006478	3.1e-05	0.006524	0.004005	0.00689	0.007357	0.00633	0.0026605	0.00572	3.3e-05	0.008845	2.1e-05	0.002763	0.006332	0.000985	0.001572	1.3e-05	0.000934	0.005825	0.000106	0.000529	0.000934	0.0476905	0.000914	0	0.002106
KSAPATGGVKKPHR(H3_27_40)	H3_27_40 K27me1	0.020761	0.022134	0.019453	0.023323	0.017912	0.0219935	0.023314	0.015283	0.024224	0.031667	0.017322	0.021525	0.018491	0.012641	0.0426755	0.015597	0.023817	0.0095295	0.008493	0.025383	0.025898	0.020025	0.014967	0.0180065	0.008389	0.014233	0.019748	0.020614	0.028571	0.0163705	0.014841	0.018572	0.0158725	0.024603	0.017633	0.0242205	0.008628	0.013349	0.025557	0.009285	0.035621	0.002483	0.006122	0.00953	0.0314575	0.016877	0.021096	0.018875
KSAPATGGVKKPHR(H3_27_40)	H3_27_40 K27me2	0.412687	0.349548	0.364397	0.346437	0.322392	0.312912	0.40058	0.333351	0.420453	0.319344	0.382561	0.265534	0.433103	0.483214	0.290712	0.347501	0.371918	0.371057	0.386557	0.357403	0.260767	0.325333	0.367357	0.277674	0.387978	0.317379	0.223239	0.326786	0.364726	0.414997	0.391162	0.45854	0.284046	0.434622	0.396014	0.328377	0.34385	0.126751	0.274295	0.257062	0.261723	0.406497	0.170369	0.125132	0.211133	0.425004	0.409195	0.392183
KSAPATGGVKKPHR(H3_27_40)	H3_27_40 K36me2	0.015748	0.01871	0.012727	0.015861	0.016046	0.0313865	0.020674	0.010925	0.0219545	0.009382	0.010629	0.027038	0.014669	0.013438	0.021326	0.020714	0.016051	0.009692	0.014477	0.035438	0.0208835	0.015531	0.01408	0.0175215	0.012839	0.016898	0.024807	0.013998	0.014895	0.0131535	0.013962	0.009191	0.0179455	0.013138	0.008386	0.0350905	0.018186	0.001843	0.008512	0.005114	0.007129	0.011074	0.012381	0.036564	0.0232055	0.01411	0.013523	0.026316
KSAPATGGVKKPHR(H3_27_40)	H3_27_40 K27me3	0.218181	0.196503	0.213674	0.195993	0.214254	0.219635	0.216232	0.289183	0.208642	0.200387	0.213323	0.21159	0.187327	0.221157	0.186542	0.163137	0.210316	0.34572	0.252361	0.128217	0.219402	0.221343	0.250674	0.291997	0.283542	0.237813	0.316794	0.162887	0.191576	0.268785	0.209912	0.181715	0.214449	0.192321	0.320567	0.212997	0.134862	0.268624	0.258092	0.342235	0.162679	0.210862	0.305465	0.308136	0.203357	0.223676	0.220483	0.138867
KSAPATGGVKKPHR(H3_27_40)	H3_27_40 K36me3	0.027696	0.015051	0.020402	0.026301	0.030609	0.026773	0.01852	0.030937	0.0309735	0.035077	0.022841	0.0245145	0.016432	0.005289	0.038094	0.08309	0.035168	0.0236455	0.010311	0.039253	0.0459585	0.029552	0.023514	0.0364075	0.011493	0.052217	0.0540885	0.010861	0.030111	0.0196355	0.035665	0.010553	0.0311005	0.029168	0.037149	0.033759	0.029764	0.101535	0.181582	0.062138	0.060572	2.2e-05	0.059713	0.000144	0.058824	0.023563	0.009512	0.0459605
KSAPATGGVKKPHR(H3_27_40)	H3_27_40 K27me2K36me1	0.030848	0.058273	0.0576495	0.04228	0.052342	0.062383	0.054425	0.058496	0.028796	0.045914	0.04399	0.114535	0.070769	0.068961	0.095235	0.022944	0.038982	0.0528175	0.04639	0.033516	0.094995	0.021532	0.064463	0.0641075	0.047321	0.038318	0.052724	0.089028	0.058951	0.042732	0.060299	0.055347	0.108277	0.036328	0.066854	0.0452845	0.07733	0.184743	3.9e-05	0.076126	0.122761	0.061919	0.082747	0.119158	0.06311	0.03772	0.031032	0.0453505
KSAPATGGVKKPHR(H3_27_40)	H3_27_40 K27me1K36me2	0.099337	0.164564	0.128739	0.13865	0.159021	0.128646	0.115976	0.106433	0.0955345	0.149839	0.122811	0.11946	0.122155	0.076821	0.112408	0.115974	0.120311	0.0718395	0.094963	0.176765	0.125846	0.105372	0.08958	0.086674	0.101294	0.133026	0.096895	0.154102	0.13786	0.106446	0.138664	0.104948	0.131652	0.111896	0.048292	0.108876	0.073339	0.134003	0.114334	0.111359	0.083944	0.133037	0.18128	0.217355	0.104238	0.125155	0.125394	0.156515
KSAPATGGVKKPHR(H3_27_40)	H3_27_40 K27me1K36me1	0.018533	0.015944	0.012733	0.018547	0.01218	0.018368	0.01406	0.007691	0.013469	0.016217	0.018374	0.012255	0.015459	0.008623	0.0166755	0.010001	0.015252	0.0076435	0.013436	0.019222	0.0177395	0.010982	0.007415	0.026114	0.005331	0.010816	0.01536	0.017629	0.025748	0.0135065	0.010077	0.013563	0.021196	0.015763	0.007452	0.0099045	0.006996	0.023574	0.005416	0.018642	0.017399	0.002149	0.007028	0.005177	0.0363845	0.012782	0.022508	0.015324
KSAPATGGVKKPHR(H3_27_40)	H3_27_40 K27me3K36me1	0.026204	0.024961	0.0295085	0.036308	0.02916	0.036391	0.027455	0.025014	0.0205235	0.025442	0.030473	0.0321395	0.01944	0.016939	0.035116	0.017589	0.019911	0.023581	0.021346	0.01354	0.0340705	0.012605	0.026046	0.049664	0.026592	0.017943	0.032421	0.016621	0.021713	0.017136	0.0167	0.030808	0.0363275	0.021864	0.039058	0.0133205	0.050332	0.007914	0.003401	0.019614	0.025972	0.025828	0.004056	0.015788	0.0320735	0.017743	0.029629	0.0301145
KSAPATGGVKKPHR(H3_27_40)	H3_27_40 K27me1K36me3	0.039981	0.052311	0.054616	0.061398	0.065213	0.06036	0.043951	0.055186	0.0435885	0.056353	0.037953	0.0727445	0.048378	0.040554	0.0710165	0.063086	0.059176	0.030897	0.039672	0.070252	0.080187	0.080502	0.044066	0.0499115	0.04501	0.042402	0.051816	0.079933	0.053184	0.0374995	0.056888	0.034558	0.0341265	0.049803	0.035134	0.0743115	0.02539	0.033103	0.041333	0.049797	0.039667	0.044899	0.08725	0.100239	0.046114	0.039884	0.040619	0.051889
KSAPATGGVKKPHR(H3_27_40)	H3_27_40 K27me2K36me2	0.016703	0.014189	0.0218795	0.016802	0.012903	0.006483	0.007565	0.013581	0.0141815	0.012877	0.015495	0.025684	0.012465	0.014285	0.020756	0.059831	0.028237	0.009899	0.026324	0.010497	0.0116455	0.037217	0.030257	0.0086785	0.010813	0.022389	0.0239535	0.021912	0.019214	0.0082035	0.013249	0.000541	0.0450625	0.007851	0.001283	0.0260035	0.024014	0.000526	0.017197	0.001577	0.013328	0.069556	0.010334	5.1e-05	0.048642	0.009581	0.005235	0.0179295
KSAPATGGVKKPHR(H3_27_40)	H3_27_40 K27me3K36me2	0.023361	0.021054	0.023558	0.019715	0.014244	0.017965	0.013256	0.019071	0.015793	0.028303	0.025703	0.039457	0.005517	0.008117	0.023656	0.050538	0.014358	0.016728	0.009074	0.009236	0.0078855	0.009673	0.028825	0.044421	0.017938	0.058169	0.0501225	0.015797	0.008722	0.01142	0.008918	0.050423	0.030218	0.000704	0.000774	0.0235665	0.184237	0.002307	0.011655	0.000652	0.137447	0.024562	0.043819	0.031049	0.077409	0.013389	0.006403	0.021785
KSAPATGGVKKPHR(H3_27_40)	H3_27_40 K27ac	0.001045	0.005493	0.0042865	0.002964	0.005083	0.006799	0.008662	0.005561	0.013707	0.000508	0.000732	0.000607	0.004127	0.005738	0.0023475	0.004426	0.0076	0.003608	0.012386	0.009763	0.003179	0.01029	0.004714	0.0013145	0.003765	0.007899	0.003829	0.001215	0.004476	0.003808	0.003103	0.003829	0.003267	0.00079	0.002921	0.0043295	0.001689	0.014151	0.002245	0.007046	0.002587	0.001029	0.00458	0.013971	0.001322	0.003561	0.003729	0.003316
KSAPSTGGVKKPHR(H33_27_40)	H33_27_40 unmod	0.000847	0.00462	0.0035905	0.003946	0.004183	0.006246	0.009388	0.006567	0.004087	0.003144	0.004084	0.0086355	0.004464	0.006319	0.0171915	0.014913	0.008529	0.0052915	0.004951	0.008759	0.0099325	0.006473	0.012437	0.012291	0.001502	0.006789	0.028535	0.007794	0.00597	0.008526	0.007767	0.005304	0.0114145	0.007715	0.007882	0.0141125	0.005028	0.002107	0.005518	0.000639	0.002644	0.013303	0.003876	0.003524	0.037081	0.00581	0.006528	0.003846
KSAPSTGGVKKPHR(H33_27_40)	H33_27_40 K36me1	0.000283	0.000599	0.0002505	0.000448	0.000371	0.000515	0.016529	4e-06	0.012674	0.007158	0	0.00521	0	0.010739	0.020337	0	0.007962	0.004098	0.004049	0.011611	0.008821	0.005876	0.006614	0.0031805	0	0.003648	0.008692	0.006729	0.00465	0.004871	0.041293	6.2e-05	7e-06	9e-05	0.038913	0.0626205	1e-06	0.011325	2.9e-05	8e-06	0.026057	0.055631	0.000798	0.001075	0.0006205	1e-06	0.002183	0.006384
KSAPSTGGVKKPHR(H33_27_40)	H33_27_40 K27me1	0.000473	0.003752	0.003215	0.002261	0.004724	0.006859	0.002264	0.003494	0.009538	0.002087	0.006496	0.0102195	0.012304	0.005771	0.0281395	0.012119	0.009797	0.010066	0.006185	0.035807	0.029355	0.004214	0.008191	0.0084865	0.005489	0.005862	0.0105985	0.011844	0.043229	0.0058785	0.015228	0.009645	0.0141275	0.022353	0.013058	0.004303	0.035361	0.016518	0.034396	0.009441	0.008584	0.043689	0.001459	0.002245	0.001095	0.002767	0.001089	0.00301
KSAPSTGGVKKPHR(H33_27_40)	H33_27_40 K27me2	0.080781	0.07899	0.0795165	0.005011	0.090007	0.104503	0.204594	0.114304	0.138309	0.163786	0.003539	0.170921	0.266371	0.174508	0.139256	0.178763	0.222499	0.275666	0.254654	0.173701	0.190818	0.224742	0.221358	0.155954	0.18796	0.176358	0.148259	0.202448	0.183458	0.212067	0.23008	0.357326	0.142177	0.149561	0.272374	0.196959	0.159042	0.149794	0.003578	0.123251	0.207729	0.175954	0.232088	0.229503	0.192445	0.007112	0.166467	0.0852415
KSAPSTGGVKKPHR(H33_27_40)	H33_27_40 K36me2	0.019826	0.023948	0.0149305	0.021142	0.016788	0.03624	0.03462	0.027734	0.02381	0.008126	0.034551	0.02943	0.006675	0.071854	0.0855005	0.066922	0.076984	0.034056	0.035934	0.046127	0.0968725	0.02308	0.027678	0.0445715	0.029825	0.056349	0.0687185	0.04669	0.029426	0.030135	0.038702	0.03462	0.068305	0.032608	0.03707	0.0742085	0.122155	0.026927	0.046495	0.018222	0.015586	0.091382	0.002765	0.032612	0.0287445	0.026242	0.021513	0.0339535
KSAPSTGGVKKPHR(H33_27_40)	H33_27_40 K27me3	0.05892	0.046688	0.0543015	0.045443	0.047302	0.060183	0.089819	0.098248	0.055278	0.100776	0.073454	0.0830765	0.201167	0.1196	0.121805	0.074681	0.117459	0.189734	0.119138	0.133122	0.148751	0.183341	0.153967	0.164526	0.248882	0.229614	0.158556	0.096555	0.147022	0.0842995	0.113085	0.078241	0.134514	0.120778	0.127757	0.167328	0.110338	0.074	0.247506	0.145915	0.135191	0.072656	0.184253	0.186361	0.138048	0.133593	0.142218	0.0500815
KSAPSTGGVKKPHR(H33_27_40)	H33_27_40 K36me3	0.010446	0.012485	0.0132455	0.009888	0.008752	0.0146155	0.036777	0.03846	0.008111	0.013194	0.014468	0.029707	0.072711	0.068278	0.017716	0.117163	0.090624	0.052015	0.028465	0.120098	0.069429	0.015236	0.079964	0.0286135	0.039789	0.048184	0.045224	0.086795	0.024042	0.0242905	0.107133	0.011928	0.07746	0.030679	0.115206	0.0508015	0.223046	0.002638	0.01436	0.21339	0.011828	0.086922	0.038649	0.010535	0.0004765	0.019156	0.010908	0.017697
KSAPSTGGVKKPHR(H33_27_40)	H33_27_40 K27me2K36me1	0.022334	0.0182	0.0322725	0.022449	0.042842	0.0423705	0.024474	0.034839	0.0818825	0.025965	0.090962	0.050186	0.053038	0.084577	0.154921	0.049553	0.072152	0.070088	0.125974	0.04093	0.0682545	0.173399	0.051258	0.098324	0.057438	0.094108	0.0907905	0.077379	0.132849	0.083181	0.101885	0.174977	0.081183	0.141385	0.078213	0.048434	0.03704	0.174875	0.026419	0.239029	0.010305	0.068936	0.018569	0.014654	0.174797	0.071177	0.079981	0.0354555
KSAPSTGGVKKPHR(H33_27_40)	H33_27_40 K27me1K36me2	0.053002	0.128393	0.0913215	0.090531	0.101123	0.104817	0.192624	0.195651	0.120046	0.147417	0.118673	0.131143	0.21184	0.251969	0.247816	0.27328	0.189953	0.214899	0.226667	0.202087	0.223659	0.193901	0.188981	0.27016	0.233807	0.243393	0.230594	0.237696	0.191999	0.238924	0.206173	0.184384	0.205533	0.302648	0.160589	0.215322	0.168581	0.126647	0.367558	0.153855	0.186953	0.156164	0.257759	0.255661	0.182464	0.184925	0.207825	0.151682
KSAPSTGGVKKPHR(H33_27_40)	H33_27_40 K27me1K36me1	0.001285	0.00192	0.003283	0.002605	0.003239	0.0047935	0.004522	0.004001	0.004498	0.002284	0.005776	0.0085955	0.013818	0.003036	0.0125525	0.009702	0.023509	0.0071225	0.005741	0.021221	0.012762	0.002054	0.003744	0.018617	0.002739	0.00782	0.00992	0.021657	0.018123	0.01524	0.010984	0.011071	0.024863	0.016123	0.014597	0.005538	0.00381	0.007453	0.000121	0.002953	0.00526	0.003885	0.005496	0.007325	0.02706	0.002579	0.00199	0.0098375
KSAPSTGGVKKPHR(H33_27_40)	H33_27_40 K27me3K36me1	0.035016	0.033865	0.0344725	0.034717	0.02374	0.0258165	0.053971	0.043327	0.0283645	0.065921	0.070186	0.048335	0.084886	0.089135	0.053252	0.063027	0.09582	0.0783645	0.070388	0.0766	0.0690115	0.084135	0.090176	0.0916375	0.097669	0.070863	0.052118	0.108033	0.113433	0.07227	0.070161	0.070699	0.084716	0.097085	0.073785	0.075426	0.049085	0.058699	0.124334	0.053426	0.068196	0.046323	0.097255	0.121955	0.0833815	0.057426	0.093135	0.024772
KSAPSTGGVKKPHR(H33_27_40)	H33_27_40 K27me1K36me3	0.013463	0.028432	0.028485	0.029643	0.029549	0.042176	0.060986	0.060747	0.039724	0.032203	0.02607	0.046888	0.064531	0.100415	0.088383	0.079109	0.064635	0.048671	0.050203	0.091236	0.063576	0.066135	0.100435	0.0955105	0.033561	0.051045	0.112965	0.091737	0.096361	0.0681	0.051397	0.0542	0.07544	0.071357	0.056672	0.0779865	0.012182	0.336692	0.051916	0.017165	0.233382	0.049249	0.091678	0.07886	0.0415075	0.040958	0.064527	0.0397365
KSAPSTGGVKKPHR(H33_27_40)	H33_27_40 K27me2K36me2	0.699837	0.615651	0.637114	0.728386	0.624413	0.548306	0.264432	0.359585	0.466365	0.423539	0.545634	0.371747	0.003336	0.003409	0.005664	0.019411	0.006375	0.002519	0.003392	0.003313	0.001899	0.013227	0.004508	0.006543	0.00096	0.000235	0.0036955	0.004589	0.002747	0.0012345	0.001995	0.002907	0.015296	0.003205	0.002333	0.00609	0.05826	0.0121	0.068415	0.021833	0.075538	0.097504	0.042663	0.030333	0.076683	0.44058	0.197095	0.535829
KSAPSTGGVKKPHR(H33_27_40)	H33_27_40 K27me3K36me2	0.003386	0.002098	0.0039095	0.003436	0.002827	0.002358	0.003611	0.008085	0.007205	0.004148	0.006107	0.005823	0.004799	0.009272	0.007024	0.038008	0.013566	0.0061445	0.063198	0.025953	0.006818	0.002619	0.045853	0.001577	8.4e-05	0.004684	0.0282105	5.3e-05	0.006524	0.150939	0.003965	0.003731	0.064327	0.00441	0.001172	0.0003495	0.015993	0.000218	0.004306	0.000722	0.012744	0.038227	0.022477	0.025163	0.0108005	0.007644	0.004539	0.0022245
KSAPSTGGVKKPHR(H33_27_40)	H33_27_40 K27ac	0.0001	0.000358	9.2e-05	9.4e-05	0.000138	0.000202	0.001389	0.004954	0.0001085	0.000252	0	8.2e-05	6e-05	0.001116	0.0004415	0.003352	0.000135	0.001264	0.001063	0.009436	4.25e-05	0.001568	0.004837	7.5e-06	0.060295	0.001047	0.003125	1e-06	0.000169	4.4e-05	0.000155	0.000907	0.000638	3e-06	0.00038	0.0005205	7.8e-05	6e-06	0.005049	0.000152	4e-06	0.000175	0.000214	0.000195	0.004796	3e-05	0	0.0002495
YRPGTVALR(H3_41_49)	H3_41_49 unmod	0.999873	0.999996	0.999972	0.999958	0.999972	0.999954	0.999999	0.999999	0.998158	1	1	0.999951	0.999493	0.999995	0.999457	0.999999	0.99991	0.999995	0.999864	0.999916	0.999749	0.999991	0.999998	0.998857	1	0.999984	0.999602	0.999986	0.999981	1	0.999994	0.999666	0.999493	0.999846	0.999993	0.999889	0.999966	0.999957	0.999813	0.999984	0.999995	0.999965	0.999926	0.999841	0.999961	0.99996	1	0.99998
YRPGTVALR(H3_41_49)	H3_41_49 Y41ph	0.000127	4e-06	2.8e-05	4.2e-05	2.8e-05	4.6e-05	1e-06	1e-06	0.001842	0	0	4.9e-05	0.000507	5e-06	0.000543	1e-06	9e-05	5e-06	0.000136	8.4e-05	0.0002515	9e-06	2e-06	0.0011425	0	1.6e-05	0.0003985	1.4e-05	1.9e-05	5e-07	6e-06	0.000334	0.0005075	0.000154	7e-06	0.000111	3.4e-05	4.3e-05	0.000187	1.6e-05	5e-06	3.5e-05	7.4e-05	0.000159	3.9e-05	4e-05	0	2e-05
YQKSTELLIR(H3_54_63)	H3_54_63 unmod	0.995879	0.998363	0.996385	0.997023	0.997841	0.998413	0.993198	0.948122	0.987163	0.994744	0.993581	0.99888	0.993369	0.980823	0.976588	0.993901	0.996791	0.997933	0.999043	0.992637	0.98593	0.983095	0.992182	0.981294	0.999987	0.986231	0.988497	0.993736	0.994609	0.987314	0.995081	0.994961	0.996521	0.96312	0.995333	0.982414	0.986237	0.997914	0.995523	0.995249	0.998118	0.982319	0.998139	0.993841	0.982892	0.998995	0.999715	0.986276
YQKSTELLIR(H3_54_63)	H3_54_63 K56me1	0.000213	0.000436	0.000568	0	0.001317	6.55e-05	0.000198	0.001028	0.0004505	0	2e-06	0.000244	0.000227	2.8e-05	0.0110955	1.1e-05	3.3e-05	4.8e-05	8e-06	4e-06	0.0001495	0.000412	2.2e-05	0.014985	1e-06	0.000107	3.15e-05	7e-06	7e-06	0.003092	2.7e-05	2.3e-05	0.0004945	0.001834	1.3e-05	0.0001635	0.001096	0	0.002829	0.000179	0	3.2e-05	0.000419	0.000266	0.000281	0	0	7.05e-05
YQKSTELLIR(H3_54_63)	H3_54_63 K56me2	0.003453	0.000701	0.002753	0.00272	0.000352	0.0010725	0.005028	0.050811	0.009228	0.005217	0.005868	0.0007045	0.00628	0.019146	0.0072135	0.005874	0.002709	0.001831	0.000949	0.007247	0.01362	0.015631	0.007493	0.002542	4e-06	0.008024	0.010757	0.006058	0.003977	0.0094305	0.004889	0.004551	0.0028435	0.019828	0.003171	0.01502	0.012312	0.002036	0.000756	0.004168	0.00182	0.010378	0.001329	0.005752	0.015884	0.000975	0.000266	0.0135835
YQKSTELLIR(H3_54_63)	H3_54_63 K56me3	4.4e-05	0	3.4e-05	4.4e-05	2.4e-05	0.0001335	0	3.8e-05	0.001171	0	0	9.5e-06	0	3e-06	0.0013445	2e-06	1e-06	0.000101	0	2.2e-05	6.65e-05	-1e-06	0.000165	0.000521	8e-06	0	0.0007095	0	0	0	0	2e-06	3.5e-05	1e-06	0.001459	0.0005705	1.6e-05	4e-05	0.000224	1e-05	8e-06	0.001371	3.1e-05	1.9e-05	1.3e-05	2e-06	1.8e-05	1e-06
YQKSTELLIR(H3_54_63)	H3_54_63 K56ac	0.000411	0.000499	0.0002605	0.000213	0.000466	0.000315	0.001576	0	0.001987	3.9e-05	0.000549	0.0001625	0.000124	0	0.0037575	0.000212	0.000465	8.65e-05	0	9e-05	0.000234	0.000864	0.000138	0.000658	0	0.005638	5e-06	0.000199	0.001408	0.0001635	3e-06	0.000462	0.0001055	0.015217	2.3e-05	0.001833	0.00034	1e-05	0.000668	0.000393	5.4e-05	0.005901	8.2e-05	0.000122	0.000931	2.9e-05	1e-06	6.85e-05
EIAQDFKTDLR(H3_73_83)	H3_73_83 unmod	0.945403	0.926865	0.922167	0.952018	0.927469	0.929585	0.961977	0.901296	0.885657	0.952609	0.882465	0.964532	0.94774	0.949879	0.921489	0.942808	0.899037	0.922128	0.958981	0.943009	0.905585	0.905801	0.880776	0.842843	0.962993	0.9289	0.886216	0.966382	0.937264	0.948998	0.931536	0.94124	0.923234	0.910227	0.865644	0.961742	0.950766	0.874643	0.932412	0.927195	0.927125	0.935688	0.941738	0.931053	0.923222	0.953053	0.932445	0.942121
EIAQDFKTDLR(H3_73_83)	H3_73_83 K79me1	0.008441	0.036042	0.011598	0.008505	0.009124	0.0145025	0.003855	0.003842	0.0594205	0.005246	0.070685	0.0030185	0.010407	0.002858	0.023108	0.009066	0.009988	0.0071225	0.002273	0.005685	0.023526	0.027517	0.006033	0.08481	0.004448	0.025418	0.028503	0.001989	0.006052	0.0120075	0.010204	0.002835	0.0417635	0.020087	0.015404	0.0053835	0.011908	0.10324	0.002222	0.019562	0.03038	0.011333	0.006555	0.007736	0.0191005	0.009118	0.017578	0.0117145
EIAQDFKTDLR(H3_73_83)	H3_73_83 K79me2	0.0435	0.034088	0.059973	0.037744	0.061063	0.0508925	0.021816	0.081384	0.043955	0.041888	0.046256	0.031331	0.040285	0.036813	0.053788	0.037439	0.076214	0.0593335	0.027842	0.040175	0.062471	0.051546	0.099747	0.0720495	0.03157	0.035273	0.073537	0.029339	0.046033	0.0307415	0.051776	0.046027	0.0291935	0.068537	0.098044	0.0305475	0.036566	0.01828	0.057109	0.049225	0.041649	0.046018	0.047408	0.05538	0.0481935	0.034996	0.04957	0.0440045
EIAQDFKTDLR(H3_73_83)	H3_73_83 K79me3	8e-06	1e-05	3.25e-05	0.000264	1.1e-05	2.35e-05	0	8.8e-05	0.000419	0	0	1.45e-05	0	3e-06	5e-05	0.000208	2e-06	0.00017	5e-06	3e-06	0.0016705	1e-06	1.6e-05	2.6e-05	0.000989	5.4e-05	4.5e-05	0	0	0	0	1.6e-05	0.0002765	9e-06	0.000614	1.15e-05	1e-06	0	0.000107	6.5e-05	8e-06	5e-06	0.000183	4.2e-05	2.9e-05	8.4e-05	0	8e-06
EIAQDFKTDLR(H3_73_83)	H3_73_83 K79ac	0.002648	0.002995	0.0062295	0.001469	0.002333	0.0049965	0.012352	0.013391	0.010548	0.000258	0.000593	0.001104	0.001568	0.010446	0.0015665	0.010479	0.014758	0.0112465	0.010899	0.011128	0.006748	0.015134	0.013428	0.0002715	1e-06	0.010356	0.011699	0.00229	0.010651	0.008252	0.006484	0.009882	0.0055315	0.001139	0.020294	0.0023145	0.000759	0.003837	0.00815	0.003953	0.000838	0.006956	0.004116	0.005789	0.0094555	0.00275	0.000407	0.0021535
VTIMPKDIQLAR(H3_117_128)	H3_117_128 unmod	0.999588	0.997703	0.990583	0.999191	0.999766	0.997331	0.99935	0.998909	0.928289	0.999719	0.998434	0.99953	0.999997	0.999966	0.995166	0.999691	0.999036	0.997691	0.998427	0.999645	0.996216	0.999799	0.999945	0.914932	0.999999	0.999892	0.979285	0.999831	0.999455	0.994906	0.999995	0.996691	0.997421	0.98823	0.999878	0.997934	0.998249	0.99967	0.978064	0.996804	0.998229	0.999682	0.99605	0.999153	0.993931	0.999596	0.999978	0.999503
VTIMPKDIQLAR(H3_117_128)	H3_117_128 K122ac	0.000412	0.002297	0.0094175	0.000809	0.000234	0.0026695	0.00065	0.001091	0.071711	0.000281	0.001566	0.0004695	3e-06	3.4e-05	0.0048335	0.000309	0.000964	0.0023095	0.001573	0.000355	0.0037845	0.000201	5.5e-05	0.085068	1e-06	0.000108	0.0207155	0.000169	0.000545	0.005094	5e-06	0.003309	0.0025785	0.01177	0.000122	0.0020655	0.001751	0.00033	0.021936	0.003196	0.001771	0.000318	0.00395	0.000847	0.006069	0.000404	2.2e-05	0.0004965
GKGGKGLGKGGAKR(H4_4_17)	H4_4_17 unmod	0.522912	0.577203	0.570204	0.567306	0.60896	0.533094	0.607613	0.754318	0.586408	0.564677	0.592322	0.492538	0.48807	0.491641	0.516846	0.612055	0.598702	0.702731	0.305324	0.573346	0.513867	0.587871	0.739691	0.553171	0.614017	0.549861	0.486359	0.639124	0.612143	0.615216	0.606237	0.656784	0.505573	0.645998	0.635516	0.504838	0.581454	0.617014	0.575055	0.603514	0.629832	0.507685	0.563569	0.56581	0.534667	0.622275	0.567993	0.565998
GKGGKGLGKGGAKR(H4_4_17)	H4_4_17 K5ac	0.029429	0.020357	0.0100805	0.02685	0.001261	0.0258135	0.016369	0.017027	0.016176	0.035807	0.027997	0.0149985	0.006786	0.043307	0.013468	0.019385	0.022434	0.014962	0.010703	0.033476	0.013024	0.041951	0.022095	0.021815	0.007715	0.03992	0.024073	0.025318	0.009523	0.0148215	0.017029	0.021447	0.0133755	0.016776	0.042138	0.0238915	0.00811	0.025363	0.011656	0.008033	0.058908	0.008273	0.005191	0.054219	0.0074875	0.013565	0.014483	0.021211
GKGGKGLGKGGAKR(H4_4_17)	H4_4_17 K8ac	0.094399	0.068408	0.019013	0.103203	0.004328	0.0376515	0.053509	0.042805	0.0513185	0.089007	0.039758	0.037252	0.024782	0.110427	0.0389205	0.063181	0.047651	0.0313915	0.024021	0.073143	0.030928	0.09341	0.041161	0.0535085	0.070235	0.079243	0.0498145	0.065976	0.027375	0.0346675	0.070745	0.063095	0.0646245	0.037699	0.059459	0.0360145	0.041488	0.04807	0.051673	0.02013	0.051331	0.031238	0.031347	0.077729	0.015111	0.027855	0.034241	0.060792
GKGGKGLGKGGAKR(H4_4_17)	H4_4_17 K12ac	0.009985	0.079294	0.035071	0.08484	0.002913	0.043402	0.123005	0.021398	0.076014	0.159624	0.023446	0.021365	0.080773	0.040765	0.0525855	0.038986	0.038042	0.03147	0.011271	0.067868	0.050186	0.012765	0.012144	0.09007	0.044072	0.074087	0.069855	0.04071	0.011194	0.0476585	0.023618	0.045171	0.0628475	0.128464	0.017112	0.0637495	0.082243	0.040447	0.005848	0.026655	0.054904	0.0444	0.042188	0.029015	0.0768875	0.052688	0.027573	0.0622315
GKGGKGLGKGGAKR(H4_4_17)	H4_4_17 K16ac	0.223265	0.148522	0.221927	0.129836	0.276685	0.248073	0.174163	0.130999	0.225566	0.126881	0.29128	0.396262	0.335577	0.224725	0.323329	0.157651	0.209711	0.169297	0.076848	0.202129	0.359218	0.232288	0.134495	0.259572	0.225292	0.204737	0.317537	0.210881	0.301027	0.255173	0.260748	0.163015	0.299252	0.160351	0.201823	0.330151	0.204518	0.176382	0.213926	0.263774	0.163377	0.24656	0.284054	0.161477	0.25542	0.252411	0.312229	0.20098
GKGGKGLGKGGAKR(H4_4_17)	H4_4_17 K5acK8ac	0	0	0	0	0	0	0.000723	0.019115	0.0106375	0.000472	0.000895	0.0014	0	0	0.0092645	0.084115	0	0	0.003869	0	0.009747	0	0	0	0	0	0	0	0	0	0	0	0	0	0	0	0.075579	0	0	0	0	0	0	0	0	0.001593	0.001744	0.00789
GKGGKGLGKGGAKR(H4_4_17)	H4_4_17 K5acK12ac	0	0	0	0	0	0	0.001945	0	0.001413	0.001128	0.001092	0.001846	0	0	0	0	0	0	0	0	0	0	0	0	0	0	0	0	0	0	0	0	0	0	0	0	0	0	0	0	0	0	0	0	0	0.003722	0.002723	0.021457
GKGGKGLGKGGAKR(H4_4_17)	H4_4_17 K5acK16ac	0	0	0	0	0	0	0.002195	0	0.0004505	0.00635	0.000726	0.0027295	0	0	0	0	0	0	0	0	0	0	0	0	0	0	0	0	0	0	0	0	0	0	0	0	0	0	0	0	0	0	0	0	0	0.004613	0.006086	0.008125
GKGGKGLGKGGAKR(H4_4_17)	H4_4_17 K8acK12ac	0.106242	0.094817	0.128699	0.077965	0.088911	0.094834	0	0	0	0	0	0	0.046639	0.071977	0.01132	0	0.05853	0.0382495	2e-06	0.028035	0.0083255	0.018668	0.026087	0.0113935	0.013806	0.022703	0.0159035	0.009426	0.022984	0.013969	0.012982	0.036376	0.0314215	0.008278	0.027993	0.0225725	0	0.080176	0.117828	0.06796	0.035444	0.110043	0.055708	0.092945	0.0826725	0	0	0.0010005
GKGGKGLGKGGAKR(H4_4_17)	H4_4_17 K8acK16ac	0	0	0	0	0	0	0.004525	0	0.0019725	0.005219	0.007848	0.016187	0	0	0	0	0	0	0	0	0	0	0	0	0	0	0	0	0	0	0	0	0	0	0	0	0	0	0	0	0	0	0	0	0	0.009669	0.013755	0.0277285
GKGGKGLGKGGAKR(H4_4_17)	H4_4_17 K12acK16ac	0.003421	1.2e-05	3.5e-06	0.001364	0.00409	1.35e-05	0.002718	6.6e-05	0.002185	0.00419	0.002272	0.0039505	2e-06	0.002733	0.022224	0.000613	0.001264	6.5e-06	0.559906	2.8e-05	5.35e-05	2.9e-05	3.4e-05	6.15e-05	2.1e-05	0.006218	0.008637	4e-06	2e-06	0.004579	0	2.6e-05	6.5e-06	5.7e-05	5e-06	0.0037065	6e-06	0.004882	2.6e-05	1.3e-05	1.6e-05	5e-06	0.008782	0.005461	0.0031685	0.000321	0.000389	0.0003305
GKGGKGLGKGGAKR(H4_4_17)	H4_4_17 K5acK8acK12ac	3.7e-05	0.000254	0.001239	0.00031	0.000576	0.0004505	0.000677	0.000479	0.0010445	0.001055	1e-06	0.000156	0.000345	0.000471	0.00057	0.001062	0.000856	0.000356	0.000192	0.000479	0.00073	0.000129	0.002399	0.0006425	1e-05	0.001084	0.00171	0.000602	0.001758	0.000961	0.000655	0.000413	0.0010855	4e-06	0.000445	0.0012445	0.000194	0.000573	0.000645	0.000668	6.5e-05	0.001062	0.000417	0.000802	0.0018575	0.000259	4e-06	0.0010775
GKGGKGLGKGGAKR(H4_4_17)	H4_4_17 K5acK8acK16ac	0	0	0	0	0	0	0	0	0	0.00136	0	0	0	0	0	0	0	0	0	0	0	0	0	0	0	0	0	0	0	0	0	0	0	0	0	0	0	0	0	0	0	0	0	0	0	0.001234	0.003398	0.007005
GKGGKGLGKGGAKR(H4_4_17)	H4_4_17 K5acK12acK16ac	0	0	0	0	0	0	0	0	0	0.000699	0	0	0	0	0	0	0	0	0	0	0	0	0	0	0	0	0	0	0	0	0	0	0	0	0	0	0	0	0	0	0	0	0	0	0	0.000952	0.00242	0.0053115
GKGGKGLGKGGAKR(H4_4_17)	H4_4_17 K8acK12acK16ac	0.009506	0.010555	0.012595	0.007522	0.010626	0.0154605	0.012372	0.013024	0.023147	0.000856	0.00491	0.0099735	0.015991	0.012405	0.0101375	0.02049	0.02128	0.0101455	0.0069	0.019077	0.0132415	0.009723	0.018923	0.008297	0.009507	0.021429	0.0184645	0.007239	0.013184	0.011844	0.007195	0.012302	0.0186855	0.002257	0.013708	0.0117195	0.005952	0.005804	0.022643	0.008494	0.005626	0.011344	0.007932	0.012186	0.0159705	0.008255	0.012389	0.0076845
GKGGKGLGKGGAKR(H4_4_17)	H4_4_17 K5acK8acK12acK16ac	0.000804	0.000578	0.0011665	0.000805	0.001649	0.001208	0.000186	0.000769	0.0036665	0.002677	0.007453	0.0013435	0.001035	0.001548	0.001334	0.002461	0.001531	0.00139	0.000962	0.002417	0.00068	0.003165	0.002971	0.0014685	0.015324	0.000718	0.007646	0.000723	0.000809	0.001109	0.000792	0.001371	0.0031285	0.000116	0.001802	0.002113	0.000456	0.001288	0.0007	0.000758	0.000498	0.03939	0.000813	0.000356	0.0067585	0.00059	0.000574	0.001178
KVLR(H4_20_23)	H4_20_23 unmod	0.020852	0.012366	0.013845	0.013169	0.023459	0.0217875	0.008708	0.003086	0.008771	0.018014	0.010299	0.053005	0.004382	0.006285	0.052349	0.003449	0.008095	0.008989	0.001841	0.001932	0.0023175	0.004718	0.034375	0.005217	0.008519	0.005879	0.039428	0.005006	0.003062	0.0212995	0.016984	0.005175	0.041636	0.010572	0.000747	0.018173	0.013089	0.011136	0.004972	0.008115	0.002879	0.05779	0.002968	0.005908	0.047519	0.016948	0.01942	0.0334495
KVLR(H4_20_23)	H4_20_23 K20me1	0.200703	0.115589	0.106515	0.113958	0.091338	0.119326	0.079279	0.097996	0.0750565	0.078168	0.080031	0.153468	0.071357	0.085179	0.094908	0.06846	0.143586	0.1014	0.091146	0.152993	0.110687	0.126908	0.075106	0.096542	0.049687	0.054951	0.118777	0.06526	0.055118	0.498501	0.1102	0.10936	0.075335	0.104777	0.078799	0.094862	0.132667	0.128746	0.082305	0.082286	0.140908	0.126002	0.076559	0.090942	0.134369	0.13636	0.334772	0.15897
KVLR(H4_20_23)	H4_20_23 K20me2	0.674488	0.806274	0.819461	0.802455	0.826879	0.822464	0.852399	0.768126	0.865004	0.84446	0.794898	0.745486	0.830175	0.755869	0.807916	0.860595	0.709659	0.814351	0.776174	0.744398	0.813275	0.822289	0.768264	0.82823	0.769908	0.849655	0.800455	0.816294	0.852243	0.413863	0.736884	0.731934	0.832391	0.751107	0.781415	0.852707	0.737027	0.780202	0.810423	0.816917	0.76344	0.78923	0.82707	0.819642	0.780423	0.74525	0.576531	0.775409
KVLR(H4_20_23)	H4_20_23 K20me3	0.100177	0.061858	0.054797	0.067367	0.055503	0.031663	0.052588	0.12618	0.044052	0.058714	0.114062	0.046127	0.091939	0.14602	0.0408415	0.061406	0.129721	0.0713355	0.123331	0.088071	0.070858	0.034891	0.119467	0.067224	0.171103	0.085681	0.036261	0.112038	0.085942	0.046995	0.134052	0.148906	0.045519	0.132012	0.135705	0.030749	0.114896	0.074763	0.096524	0.090471	0.09037	0.020397	0.091595	0.07874	0.028239	0.098437	0.063567	0.0267025
KVLR(H4_20_23)	H4_20_23 K20ac	0.003781	0.003912	0.0053825	0.00305	0.002822	0.0047595	0.007026	0.004612	0.007117	0.000643	0.000709	0.0019145	0.002146	0.006647	0.003986	0.006091	0.008938	0.0039255	0.007508	0.012606	0.0028615	0.011193	0.002789	0.002788	0.000784	0.003835	0.005078	0.001403	0.003635	0.019341	0.001881	0.004625	0.0051195	0.001532	0.003333	0.0035095	0.00232	0.005153	0.005776	0.002212	0.002403	0.006581	0.001809	0.004767	0.0094505	0.003005	0.00571	0.0054685
DNIQGITKPAIR(H4_24_35)	H4_24_35 unmod	1	1	1	1	1	1	1	1	1	1	1	1	1	1	1	1	1	1	1	1	1	1	1	1	1	1	1	1	1	1	1	1	1	1	1	1	1	1	1	1	1	1	1	1	1	1	1	1
RGGVKR(H4_40_45)	H4_40_45 unmod	0.999926	0.99973	0.999707	0.999735	0.999767	0.999802	0.999996	0.999671	0.999565	0.999875	0.999992	0.999762	0.999993	0.999968	0.998006	0.999936	0.999863	0.999705	0.999031	0.998591	0.999976	0.992984	0.999788	0.998737	0.998534	0.999876	0.999426	0.999921	0.999992	0.999965	0.999581	0.999878	0.999493	0.999818	0.999696	0.999715	0.999504	0.999931	0.999512	0.999815	0.999951	0.998911	0.999813	0.999806	0.999823	0.999941	0.999988	0.999906
RGGVKR(H4_40_45)	H4_40_45 K44ac	7.4e-05	0.00027	0.0002925	0.000265	0.000233	0.0001985	4e-06	0.000329	0.0004345	0.000125	8e-06	0.000238	7e-06	3.2e-05	0.001994	6.4e-05	0.000137	0.000295	0.000969	0.001409	2.4e-05	0.007016	0.000212	0.0012635	0.001466	0.000124	0.000574	7.9e-05	8e-06	3.5e-05	0.000419	0.000122	0.0005075	0.000182	0.000304	0.0002845	0.000496	6.9e-05	0.000488	0.000185	4.9e-05	0.001089	0.000187	0.000194	0.0001765	5.9e-05	1.2e-05	9.45e-05
KTVTAMDVVYALKR(H4_79_92)	H4_79_92 unmod	1	1	1	1	1	1	1	1	1	1	1	1	1	1	1	1	1	1	1	1	1	1	1	1	1	1	1	1	1	1	1	1	1	1	1	1	1	1	1	1	1	1	1	1	1	1	1	1
unmod(H1_1_35)	H1_1_35 H12.SETAPAAPAAAPPAEKAPVKKKAAKKAGGTPR	0.081848	0.08039	0.0545635	0.011031	0.081292	0.007132	0.046952	0.080385	0.0407235	0.008424	0.011959	0.020068	0.010006	0.008477	0.0646175	0.047315	0.009573	0.0596485	0.001403	0.004173	0.304351	0.000245	0.00976	0.590526	0.001101	0.000107	0.014535	0.077096	0.065153	0.0555185	0.026444	0.070151	0.007666	0.011413	0.000723	0.030904	0.026395	0.041213	0.025446	0.067934	0.029733	0.020485	0.072654	0.047689	0.0217105	0.083973	0.018433	0.007307
unmod(H1_1_35)	H1_1_35 H13.SETAPLAPTIPAPAEKTPVKKKAKKAGATAGKR	0.045731	0.35844	0.277006	0.660108	0.029466	0.551015	0.127322	0.110237	0.122203	0.287956	0.137794	0.552029	0.306774	0.214927	0.632135	0.096835	0.162257	0.187089	0.040264	0.048823	0.658736	0.014014	0.069102	0.246027	0.014998	0.142696	0.792309	0.159054	0.148412	0.165631	0.110652	0.12958	0.360756	0.146206	0.144002	0.131393	0.072594	0.437196	0.285885	0.116267	0.16209	0.331456	0.142451	0.08716	0.728214	0.122461	0.135772	0.401745
unmod(H1_1_35)	H1_1_35 H14.SETAPAAPAAPAPAEKTPVKKKAR	0.774218	0.49161	0.513625	0.305986	0.76885	0.362762	0.457752	0.537993	0.607039	0.477223	0.827678	0.313686	0.661362	0.348653	0.176422	0.450552	0.65821	0.326908	0.776545	0.343326	0.032822	0.071098	0.523657	0.114988	0.962092	0.607187	0.192725	0.391911	0.573062	0.353973	0.71864	0.61324	0.369147	0.533923	0.16497	0.566366	0.698839	0.301052	0.483915	0.579968	0.614266	0.350462	0.589384	0.600156	0.170427	0.650424	0.817809	0.298033
unmod(H1_1_35)	H1_1_35 H15.SETAPAETATPAPVEKSPAKKKATKKAAGAGAAKR	0.098203	0.069559	0.154807	0.022875	0.120393	0.0790915	0.367974	0.271386	0.230035	0.226397	0.022569	0.114217	0.021857	0.427942	0.126826	0.405298	0.169959	0.426354	0.181788	0.603679	0.0040895	0.914643	0.39748	0.048459	0.021809	0.25001	0.000431	0.371938	0.213373	0.424878	0.144264	0.187029	0.262431	0.308457	0.690305	0.271336	0.202172	0.220539	0.204755	0.235831	0.193911	0.297597	0.19551	0.264995	0.0796485	0.143142	0.027987	0.292916
unmod(H1_54_81)	H1_54_81 H11.GGVSLAALKKALAAAGYDVEKNNSR	0.039143	0.017711	0.0176815	0.039219	0.018031	0.006845	0.006742	0.004977	0.131721	0.047819	0.02437	0.079296	9.9e-05	0.008088	0.0267225	0.013875	0.051943	0.0003715	0.001774	7.2e-05	0.0770995	0.054267	0.065765	0.075429	0.041989	0.078764	0.0831475	0.045255	0.000463	0.021391	0.021608	0.039262	0.095318	0.017685	0.013131	0.006765	0.012478	0.054884	0.020068	0.013412	0.002606	0.544678	0.001421	0.029554	0.01929	0.016589	0.011646	0.0015125
unmod(H1_54_81)	H1_54_81 H1v234.SGVSLAALKKALAAAGYDVEKNNSR	0.914084	0.135777	0.711333	0.629664	0.963807	0.934381	0.893251	0.992715	0.446276	0.516423	0.30112	0.689256	0.155036	0.964656	0.681839	0.478578	0.932725	0.670879	0.320131	0.985691	0.787531	0.881816	0.40593	0.471887	0.601057	0.662467	0.884413	0.526382	0.282896	0.880337	0.152144	0.060432	0.545569	0.708044	0.964696	0.901639	0.838072	0.907351	0.938789	0.435233	0.482188	0.201723	0.948798	0.947481	0.55028	0.679585	0.53615	0.883431
unmod(H1_54_81)	H1_54_81 H15.NGLSLAALKKALAAGGYDVEKNNSR	0.041708	0.846514	0.268609	0.321147	0.011266	0.058164	0.099658	0.002308	0.416864	0.42662	0.671222	0.226423	0.811948	0.026315	0.254391	0.507179	0.014831	0.328261	0.67739	0.011338	0.133109	0.061869	0.515614	0.451392	0.308899	0.258353	0.032334	0.426838	0.716472	0.0862005	0.825193	0.786256	0.358896	0.271526	0.021016	0.089665	0.139735	0.034266	0.031321	0.547298	0.511019	0.251226	0.047864	0.021463	0.430438	0.296879	0.452139	0.114368
unmod(H1_54_81)	H1_54_81 H1T.VGMSLVALKKALAAAGYDVEKNNSR	0.005066	-2e-06	0.0023765	0.00997	0.006897	0.0006095	0.000349	0	0.0051385	0.009138	0.003288	0.0050255	0.032917	0.000941	0.0370485	0.000368	0.000501	0.000489	0.000705	0.002899	0.0022605	0.002048	0.012691	0.0012925	0.048055	0.000416	0.0001055	0.001525	0.000169	0.0120715	0.001055	0.11405	0.000218	0.002746	0.001158	0.0019315	0.009716	0.003499	0.009822	0.004057	0.004187	0.002374	0.001917	0.001502	-7.5e-06	0.006947	6.5e-05	0.000689
KGNYAER(H2A1_36_42)	H2A1_36_42 unmod	0.999985	0.999977	0.999981	0.999993	0.999983	0.999989	1	0.99999	0.999497	0.999997	1	1	1	0.999955	0.999989	0.999999	0.999997	0.99995	0.999998	1	0.999861	1	0.999997	0.999694	0.999445	1	0.999938	0.999999	0.999999	0.999992	1	0.99986	0.999924	0.999996	0.999955	0.999998	0.999999	0.999949	0.999933	0.999996	0.999997	0.999999	0.999969	0.999987	0.999978	0.999997	1	0.999987
KGNYAER(H2A1_36_42)	H2A1_36_42 K36ac	1.5e-05	2.3e-05	1.85e-05	7e-06	1.7e-05	1.1e-05	0	1e-05	0.000503	3e-06	0	5e-07	0	4.5e-05	1.1e-05	1e-06	3e-06	5.05e-05	2e-06	0	0.000139	0	3e-06	0.000306	0.000555	0	6.25e-05	1e-06	1e-06	8e-06	0	0.00014	7.55e-05	4e-06	4.5e-05	2e-06	1e-06	5.1e-05	6.7e-05	4e-06	3e-06	1e-06	3.1e-05	1.3e-05	2.15e-05	3e-06	0	1.35e-05
KGNYSER(H2A3_36_42)	H2A3_36_42 unmod	0.999354	0.999737	0.999318	0.999902	0.999421	0.999412	0.999954	0.999721	0.999464	0.999927	0.97178	0.998999	0.969664	0.999971	0.991298	0.999986	0.997977	0.999621	0.994316	0.998068	0.997888	0.999748	0.999933	0.994236	0.99807	0.999834	0.998626	0.999902	0.998574	0.99989	0.999605	0.999997	0.99816	0.993516	0.999737	0.991202	0.9997	0.99991	0.999384	0.999689	0.999756	0.978964	0.999839	0.999737	0.998872	0.999872	0.9963	0.999748
KGNYSER(H2A3_36_42)	H2A3_36_42 K36ac	0.000646	0.000263	0.0006815	9.8e-05	0.000579	0.000588	4.6e-05	0.000279	0.000536	7.3e-05	0.02822	0.0010015	0.030336	2.9e-05	0.008702	1.4e-05	0.002023	0.0003795	0.005684	0.001932	0.002112	0.000252	6.7e-05	0.0057635	0.00193	0.000166	0.0013735	9.8e-05	0.001426	0.00011	0.000395	3e-06	0.00184	0.006484	0.000263	0.0087975	0.0003	9e-05	0.000616	0.000311	0.000244	0.021036	0.000161	0.000263	0.001128	0.000128	0.0037	0.0002525
KGHYAER(H2AX_36_42)	H2AX_36_42 unmod	0.993605	0.999397	0.997423	0.999078	0.997972	0.9996	0.99998	0.994801	0.996672	0.999313	0.998352	0.996875	0.999881	0.999758	0.990054	0.997458	0.999555	0.997542	0.999971	0.999593	0.995856	0.999641	0.999995	0.995474	0.99593	0.999817	0.98367	0.999986	0.999962	0.999143	0.999197	0.998012	0.981259	0.991672	0.99999	0.980491	0.993855	0.997067	0.999025	0.999891	0.999497	0.995783	0.999459	0.994181	0.989515	0.999653	0.999835	0.999757
KGHYAER(H2AX_36_42)	H2AX_36_42 K36ac	0.006395	0.000603	0.002577	0.000922	0.002028	0.0004	2e-05	0.005199	0.003328	0.000687	0.001648	0.003125	0.000119	0.000242	0.0099465	0.002542	0.000445	0.002458	2.9e-05	0.000407	0.004144	0.000359	5e-06	0.004526	0.00407	0.000183	0.01633	1.4e-05	3.8e-05	0.0008575	0.000803	0.001988	0.0187415	0.008328	1e-05	0.0195095	0.006145	0.002933	0.000975	0.000109	0.000503	0.004217	0.000541	0.005819	0.010485	0.000347	0.000165	0.000243
GKQGGKAR(H2A1_4_11)	H2A1_4_11 unmod	0.958257	0.973293	0.966988	0.965237	0.956867	0.947885	0.967472	0.916039	0.948963	0.961151	0.950965	0.952309	0.932426	0.970699	0.94846	0.908582	0.966042	0.94964	0.941378	0.942198	0.966126	0.904131	0.900567	0.946797	0.938146	0.951258	0.918232	0.963997	0.9661	0.95802	0.940077	0.952829	0.952364	0.978916	0.960046	0.925033	0.958079	0.959323	0.979722	0.896923	0.974842	0.979945	0.939465	0.965187	0.951628	0.964038	0.95961	0.962222
GKQGGKAR(H2A1_4_11)	H2A1_4_11 K5ac	0.025963	0.012254	0.024472	0.022679	0.027958	0.041726	0.0301	0.079338	0.030344	0.025301	0.038586	0.0220945	0.020804	0.015194	0.037547	0.031071	0.031518	0.02924	0.009908	0.013577	0.0174975	0.05241	0.086618	0.0380755	0.030544	0.02493	0.0694915	0.025409	0.018125	0.0224695	0.038155	0.014443	0.042363	0.018264	0.034906	0.024567	0.019819	0.0143	0.011697	0.047464	0.020381	0.017173	0.023443	0.028245	0.03996	0.026719	0.023422	0.0268875
GKQGGKAR(H2A1_4_11)	H2A1_4_11 K9ac	0.000443	0.00181	0.0010945	0.001057	0.001903	0.002285	0.000754	0.000429	0.001851	0.000237	0.000584	0.0044915	6.9e-05	0.01167	0.000471	0.000317	0.000412	0.003236	0.000323	6.1e-05	0.000712	0.011658	0.011142	0.001644	0.005186	0.001496	0.0054615	0.001914	0.000262	0.000261	0.003088	0.000157	0.0008935	0.000389	0.002843	0.001623	0	0.001364	0.003545	0.001802	0.001972	0.001229	0.003893	0.003997	0.001923	0.000199	0.001364	0.00093
GKQGGKAR(H2A1_4_11)	H2A1_4_11 K5acK9ac	0.013523	0.011662	0.005995	0.00957	0.011683	0.006723	0.000437	0.000782	0.0174085	0.012516	0.008845	0.0203585	0.036534	0.000284	0.0110555	0.059187	0.000886	0.0168825	0.047001	0.043066	0.012153	0.031042	0.000525	0.002542	0.01966	0.021326	0.004772	0.007377	0.013921	0.0169355	0.017416	0.030924	0.0014575	0.000553	0.000436	0.047316	0.020871	0.023415	0.001847	0.051517	0.000732	0.00071	0.03067	0.000914	0.0037205	0.007708	0.013575	0.008992
GKQGGKAR(H2A1_4_11)	H2A1_4_11 K9me1	0.001405	0.000803	0.0010915	0.001292	0.001461	0.000972	0.000906	0.00231	0.0010445	0.000658	0.000922	0.000511	0.001423	0.001423	0.002264	0.000781	0.000937	0.000861	0.001384	0.000912	0.002386	0.000729	0.001031	0.0039065	0.003502	0.000989	0.001261	0.000125	0.001587	0.001853	0.000964	0.001091	0.002106	0.001715	0.001717	0.0008135	0.001056	0.001561	0.002247	0.001938	0.001852	0.000631	0.002328	0.001354	0.001462	0.001207	0.002011	0.0005855
GKQGGKAR(H2A1_4_11)	H2A1_4_11 K5me1	0.000409	0.000177	0.0003585	0.000165	0.000128	0.0004085	0.000331	0.001103	0.0003875	0.000136	9.7e-05	0.000236	0.008743	0.000729	0.0002025	6.2e-05	0.000205	0.000141	6e-06	0.000185	0.001125	2.9e-05	0.000116	0.007035	0.002962	2e-06	0.000782	0.001179	5e-06	0.000461	0.0003	0.000556	0.000815	0.000162	5.2e-05	0.0006485	0.000174	3.7e-05	0.000943	0.000356	0.00022	0.000312	0.0002	0.000303	0.001307	0.00013	1.7e-05	0.000383
GKQGGKVR(H2AJ_4_11)	H2AJ_4_11 unmod	0.013171	0.01121	0.0215145	0.014047	0.020714	0.0111605	0.012049	0.060875	0.0122605	0.026993	0.032847	0.0117835	0.035614	0.047579	0.0286965	0.020384	0.021689	0.024698	0.039226	0.019448	0.0374625	0.012079	0.022794	0.0272095	0.028775	0.054719	0.009941	0.028341	0.021694	0.023931	0.03093	0.029731	0.0321945	0.031438	0.043915	0.0181425	0.023754	0.009042	0.044126	0.06124	0.02775	0.011086	0.034848	0.040964	0.012835	0.021131	0.011831	0.003812
GKQGGKVR(H2AJ_4_11)	H2AJ_4_11 K5ac	0.000605	0.000298	0.0005265	0.000674	0.000762	0.0002335	0.000515	0.001799	0.0005445	0.000496	0.000632	0.0002085	0.00203	0.001666	0.002135	0.000962	0.001076	0.001134	0.001508	0.001065	0.002611	0.000744	0.001192	0.0034745	0.000534	0.00076	0.0003595	0.000918	0.000879	0.0012695	0.001075	0.001564	0.002405	0.001792	0.002057	0.001242	0.00048	0.00064	0.00113	0.001454	0.000593	0.000214	0.001924	0.000641	0.000432	0.000302	0.000558	0.0001495
GKQGGKVR(H2AJ_4_11)	H2AJ_4_11 K9ac	1.6e-05	5.7e-05	7.7e-05	8e-06	0	5.1e-05	0	0.000107	1.5e-06	1.3e-05	0	0.0001085	3e-06	1.3e-05	9.85e-05	0	3.3e-05	4.75e-05	2e-06	2.6e-05	2.65e-05	0	4e-06	0.0002625	0.000496	8e-06	0.0002415	0	7e-06	1.05e-05	0.000142	6.6e-05	0.00018	3.8e-05	5e-06	0	5e-06	5e-05	0.000139	0.00024	6e-06	2e-05	0	5.8e-05	0.0001295	3.1e-05	0.000198	1.85e-05
GKQGGKVR(H2AJ_4_11)	H2AJ_4_11 K5acK9ac	0.985198	0.987272	0.975575	0.982923	0.977377	0.987401	0.986883	0.936516	0.984105	0.969806	0.964157	0.984706	0.960867	0.942346	0.96096	0.977841	0.97682	0.97245	0.95859	0.977954	0.953701	0.98648	0.975529	0.960549	0.934205	0.943858	0.975845	0.968178	0.976643	0.970739	0.966436	0.964871	0.962526	0.963381	0.95254	0.979329	0.973457	0.984624	0.949469	0.932736	0.966387	0.985026	0.957617	0.953718	0.983583	0.947077	0.987393	0.95783
GKQGGKVR(H2AJ_4_11)	H2AJ_4_11 K9me1	0	0	8.4e-05	7e-06	0	0.000178	0	0.00064	0.0001555	0	0	4.6e-05	0.001286	0.000618	0.004486	0.000633	0.000251	0.0006865	0	0	5.65e-05	3e-06	0.000461	0.0001785	0	0.00038	0.0020605	0.000521	0.000768	0.0007035	0	0	0	0	0	0	0	0.005628	0	0	0	0.000448	0	0	0.000118	0.031059	0	0.03726
GKQGGKVR(H2AJ_4_11)	H2AJ_4_11 K5me1	0.00101	0.001164	0.0022225	0.002341	0.001148	0.000976	0.000553	6.2e-05	0.0029325	0.002691	0.002363	0.003148	0.000199	0.007779	0.003624	0.00018	0.000131	0.0009835	0.000674	0.001507	0.006142	0.000694	2e-05	0.0083255	0.03599	0.000276	0.0115515	0.002042	9e-06	0.003345	0.001417	0.003767	0.0026945	0.003351	0.001484	0.001286	0.002304	1.7e-05	0.005136	0.00433	0.005265	0.003206	0.005611	0.004619	0.002902	0.0004	2e-05	0.0009295
GKTGGKAR(H2AX_4_11)	H2AX_4_11 unmod	0.082202	0.072094	0.092003	0.100471	0.082502	0.0986	0.054078	0.061208	0.086642	0.143478	0.064146	0.128269	0.102243	0.055692	0.0829005	0.07536	0.094396	0.0914225	0.048556	0.081815	0.111258	0.0538	0.084945	0.160583	0.097192	0.057404	0.128629	0.114805	0.090435	0.0480815	0.099598	0.039972	0.107651	0.064489	0.119379	0.0695795	0.075652	0.062402	0.052708	0.082259	0.111761	0.089192	0.095495	0.081146	0.130079	0.114544	0.116497	0.0691205
GKTGGKAR(H2AX_4_11)	H2AX_4_11 K5ac	0.00187	0.003239	0.005903	0.005377	0.006175	0.005638	0.001742	0.001129	0.0065435	0.017748	0.001728	0.0140345	0.00525	0.00859	0.0046845	0.006757	0.007004	0.004289	0.016036	0.010578	0.004267	0.001006	0.003822	0.0080905	0.002403	0.00426	0.0201375	0.001271	0.008104	0.0050835	0.008381	0.001914	0.0052495	0.002661	0.004848	0.0031035	0.001745	0.005524	0.009188	0.0073	0.002426	0.00352	0.006698	0.011896	0.009839	0.004866	0.002401	0.0063535
GKTGGKAR(H2AX_4_11)	H2AX_4_11 K9ac	0.000367	0.000499	0.0070355	0.007464	0.00656	0.007746	0.000862	0.001394	0.0055935	0.030842	0.000626	0.007598	0.007205	0.010061	0.004185	0.006346	0.006599	0.0123225	0.018044	0.014669	0.0027875	0.000858	0.012517	0.0028135	0.01683	0.009495	0.0041525	0.000894	0.007081	0.003196	0.034225	0.000464	0.0025895	0.002006	0.001726	0.0010395	0.002628	0.00339	0.013406	0.005452	0.001864	0.005615	0.004002	0.007164	0.0096895	0.003238	0.001949	0.0050915
GKTGGKAR(H2AX_4_11)	H2AX_4_11 K5acK9ac	0.002984	0.001125	0.000907	0.000499	0.000203	0.0009395	4.2e-05	0.000197	0.001177	0.01495	0.000472	0.000263	0.000284	0.000808	0.001171	0.002696	0.001402	0.0011805	0.000978	0.001767	0.0010835	0.004957	0.000221	0.024532	0.001965	0.001052	0.0008295	6e-05	0.001982	0.0027965	0.000534	0.001402	0.007399	0.003459	0.002653	0.000653	0.003884	0.000444	0.001094	0.001028	0.003895	0.003073	0.000798	0.000404	0.0020475	0.00093	0.002252	0.0005685
GKTGGKAR(H2AX_4_11)	H2AX_4_11 K9me1	0.644706	0.710893	0.66169	0.710491	0.664842	0.676394	0.72717	0.6319	0.60501	0.556118	0.685766	0.607478	0.645063	0.631706	0.61275	0.692845	0.62722	0.665867	0.647761	0.630005	0.623406	0.735614	0.724248	0.54257	0.637282	0.714549	0.596735	0.717108	0.660918	0.728613	0.590789	0.723694	0.64329	0.618948	0.667204	0.680012	0.611409	0.598941	0.697758	0.664806	0.663313	0.593537	0.637514	0.641802	0.611637	0.603993	0.587977	0.677465
GKTGGKAR(H2AX_4_11)	H2AX_4_11 K5me1	0.267871	0.21215	0.232461	0.175697	0.239718	0.210683	0.216107	0.304171	0.295034	0.236865	0.247262	0.242359	0.239955	0.293143	0.294308	0.215995	0.263379	0.224917	0.268626	0.261166	0.257198	0.203765	0.174247	0.261411	0.244329	0.213241	0.249517	0.165862	0.23148	0.21223	0.266472	0.232555	0.23382	0.308438	0.20419	0.245612	0.304681	0.3293	0.225846	0.239154	0.216742	0.305063	0.255494	0.257589	0.236707	0.272428	0.288925	0.241401
SGRGKQGGKAR(H2A1_1_11)	H2A1_1_11 unmod	0.322221	0.215511	0.271433	0.150267	0.155638	0.18555	0.345538	0.152554	0.380944	0.230345	0.210875	0.514169	0.386511	0.044401	0.2393	0.439563	0.222524	0.0585455	0.019346	0.609732	0.256618	0.274406	0.185323	0.148329	0.13976	0.478823	0.394281	0.264922	0.056368	0.175847	0.296154	0.055588	0.288816	0.109956	0.263692	0.195776	0.223654	0.313664	0.040982	0.202706	0.389751	0.753548	0.385977	0.212516	0.055399	0.258112	0.094934	0.269969
SGRGKQGGKAR(H2A1_1_11)	H2A1_1_11 S1ac	0.261645	0.285813	0.329498	0.283185	0.142408	0.103221	0.576723	0.534311	0.135362	0.305468	0.242889	0.267448	0.571149	0.350615	0.464249	0.319434	0.316224	0.0404815	0.011871	0.104927	0.513013	0.659421	0.211679	0.416745	0.600109	0.126829	0.332398	0.054916	0.624564	0.215935	0.187077	0.048274	0.33824	0.497957	0.228937	0.260984	0.100923	0.270551	0.05685	0.280659	0.29158	0.086148	0.254001	0.255117	0.416772	0.206074	0.117134	0.124643
SGRGKQGGKAR(H2A1_1_11)	H2A1_1_11 K5ac	0.416134	0.498676	0.399068	0.566547	0.701954	0.711229	0.07774	0.313135	0.483695	0.464187	0.546236	0.218382	0.042339	0.604984	0.29645	0.241002	0.461251	0.900973	0.968783	0.285341	0.230369	0.066173	0.602998	0.434926	0.260131	0.394348	0.273321	0.680162	0.319068	0.608218	0.516769	0.896138	0.372945	0.392088	0.507371	0.54324	0.675423	0.415784	0.902168	0.516635	0.318668	0.160304	0.360022	0.532367	0.527829	0.535813	0.787932	0.605388
AGGKAGKDSGKAKAKAVSR(H2AV_1_19)	H2AV_1_19 unmod	0.824589	0.775001	0.853171	0.821532	0.871638	0.701738	0.929649	0.794449	0.962614	0.968119	0.960701	0.879059	0.970516	0.843601	0.876724	0.907745	0.907105	0.879428	0.82288	0.865221	0.954	0.639842	0.74181	0.816568	0.946242	0.878201	0.936848	0.93356	0.93408	0.914447	0.962932	0.901561	0.862523	0.982229	0.846972	0.936087	0.957379	0.579335	0.918852	0.893693	0.932678	0.954449	0.945132	0.932485	0.708742	0.965135	0.948981	0.871618
AGGKAGKDSGKAKAKAVSR(H2AV_1_19)	H2AV_1_19 K4ac	0.006674	0.013795	0.0121685	0.017213	0.018032	0.0068895	0.022192	0.040562	0.003523	0.007668	0.006439	0.0287235	0.00245	0.031209	0.0807895	0.001375	0.000339	0.0380205	0.067387	0.004108	0.000186	0.019119	0.195864	0.0219125	0.004694	0.042802	0.0168755	0.053164	0.030983	0.03265	0.011084	0.033165	0.0129885	0.000314	0.031895	0.0277155	0.012045	0.006813	0.033437	0.010287	0.010258	0.006516	0.012415	0.013721	0.01172	0.012632	0.022637	0.0132035
AGGKAGKDSGKAKAKAVSR(H2AV_1_19)	H2AV_1_19 K7ac	0.102054	0.128696	0.000681	1e-06	0.070282	0.02315	0.02842	0.008645	0.0022485	0.013216	0.00895	0.0032535	0.000161	0.001952	0.002877	0.000945	0.00062	0.005736	0.000447	2.4e-05	0	1.7e-05	0.004335	0.000603	7e-06	-1e-06	0	0	0	3.55e-05	0.008681	0.007269	0.00267	0	0.006157	1e-06	0.007609	0.139996	2e-06	0.044706	0.028977	0.005635	2e-06	0.003048	2.5e-06	0.014529	0.011525	0.023484
AGGKAGKDSGKAKAKAVSR(H2AV_1_19)	H2AV_1_19 K11ac	0.007676	0.000124	0.0319675	0.020845	7.2e-05	0.001791	0.018443	0.010826	0.003047	0	0.019063	0.000776	0.00056	0.010439	0.00093	0.000751	0.000127	0.01807	0.009662	0.00013	0.0008675	0.001068	0.036155	0.001512	0.012649	0.049623	2.25e-05	1.4e-05	0.025517	0.0003015	0.009985	0.00012	0.091093	0.000187	5.9e-05	0.0044205	0.008446	0.000372	0.000101	0.016095	0.006409	2.9e-05	0.009912	0.016583	0.0002395	0.002367	0.00041	0.002177
AGGKAGKDSGKAKAKAVSR(H2AV_1_19)	H2AV_1_19 K15ac	3e-06	3e-06	1.5e-06	1e-06	3e-06	0.103961	0	2e-06	0.0022485	0	0	-5e-07	0.000161	0.001952	0.0004315	1e-06	5.4e-05	0.005415	0.000447	2.4e-05	0	1.7e-05	0.004335	0.000603	7e-06	-1e-06	0	0	0	3.55e-05	9e-06	0	0.004934	0	0	1e-06	0.000742	3e-06	2e-06	2e-06	2e-06	1e-06	2e-06	1e-06	2.5e-06	0	0.011525	5e-07
AGGKAGKDSGKAKAKAVSR(H2AV_1_19)	H2AV_1_19 K4acK7ac	0.055368	0.080161	0.0201515	3.5e-05	0.038649	0.0079615	0.000409	0.143943	0.00771	0.005347	0.002628	0.087349	0.00638	0.110752	0.0158545	0.074034	0.091412	0.004966	0.092487	0.095774	0.029481	0.207065	4.9e-05	0.065068	3.4e-05	0.01643	0.010161	0.007046	0.004747	0.020167	0.002539	0.056949	0.0125995	0.003585	0.114493	0.0290085	0.013214	0.000592	0.04739	0.033412	0.017051	0.030393	0.032191	0.033935	0.0291785	0.005148	0.000324	0.0034
AGGKAGKDSGKAKAKAVSR(H2AV_1_19)	H2AV_1_19 K4acK11ac	3e-06	3e-06	1.5e-06	1e-06	3e-06	0.010488	0.000113	2e-06	0.0036985	0.001107	0.000409	8.5e-06	0.003951	1e-06	0.0037005	1e-06	0	0.0029965	0	0	0.003087	0	0	0.0062085	0.000774	0.002579	0.007215	0.001242	0.000933	0.0064475	0.00095	0	0.00125	0.001619	0	0.000457	0	3e-06	2e-06	2e-06	2e-06	1e-06	2e-06	1e-06	2.5e-06	0	0.00092	0.0166445
AGGKAGKDSGKAKAKAVSR(H2AV_1_19)	H2AV_1_19 K4acK15ac	3e-06	3e-06	1.5e-06	1e-06	3e-06	0.010488	0.000113	2e-06	0.0036985	0.001107	0.000409	8.5e-06	0.003951	1e-06	0.0037005	1e-06	0	0.0029965	0	0	0.003087	0	0	0.0062085	0.000774	0.002579	0.007215	0.001242	0.000933	0.0064475	0.00095	0	0.00125	0.001619	0	0.000457	0	3e-06	2e-06	2e-06	2e-06	1e-06	2e-06	1e-06	0.184399	0	0.00092	0.0166445
AGGKAGKDSGKAKAKAVSR(H2AV_1_19)	H2AV_1_19 K7acK11ac	3e-06	3e-06	0.0812475	0.139979	3e-06	0.112254	0.000113	2e-06	0.0036985	0.001107	0.000409	8.5e-06	0.003951	1e-06	0.0037005	1e-06	0	0.036252	0	0	0.003087	0	0.017391	0.0062085	0.000774	0.002579	0.007215	0.001242	0.000933	0.0064475	0.00095	0	0.00125	0.001619	0	0.000457	0	3e-06	2e-06	2e-06	2e-06	1e-06	2e-06	1e-06	2.5e-06	0	0.00092	0.018703
AGGKAGKDSGKAKAKAVSR(H2AV_1_19)	H2AV_1_19 K7acK15ac	3e-06	3e-06	1.5e-06	1e-06	3e-06	0.010488	0.000113	2e-06	0.0036985	0.001107	0.000409	8.5e-06	0.003951	1e-06	0.0037005	1e-06	0	0.0029965	0	0	0.003087	0	0	0.0062085	0.000774	0.002579	0.007215	0.001242	0.000933	0.0064475	0.00095	0	0.00125	0.001619	0	0.000457	0	0.007701	2e-06	2e-06	2e-06	1e-06	2e-06	1e-06	2.5e-06	0	0.00092	0.0166445
AGGKAGKDSGKAKAKAVSR(H2AV_1_19)	H2AV_1_19 K11acK15ac	3e-06	3e-06	1.5e-06	1e-06	3e-06	0.010488	0.000113	0.000749	0.0036985	0.001107	0.000409	8.5e-06	0.003951	1e-06	0.0037005	1e-06	0	0.0029965	0	0	0.003087	0	0	0.0062085	0.000774	0.002579	0.007215	0.001242	0.000933	0.0064475	0.00095	0	0.00125	0.001619	0	0.000457	0	0.264491	2e-06	2e-06	2e-06	1e-06	2e-06	1e-06	0.063685	0	0.00092	0.0166445
AGGKAGKDSGKAKAKAVSR(H2AV_1_19)	H2AV_1_19 K7acK11acK15ac	0.000289	0.000772	0.000157	0.000135	0.000401	7.55e-05	0	5.7e-05	1e-05	1e-06	1e-06	6.45e-05	2e-06	1.2e-05	0.000949	0.000241	1e-05	2.2e-05	6e-06	0.000547	4e-06	3.3e-05	7e-06	0.01318	0.008047	2e-06	2.5e-06	1e-06	1e-06	1e-06	0	1.3e-05	0.001352	1.3e-05	8e-06	4.05e-05	0.000104	0.000109	3.6e-05	0.000349	0.001094	0.000601	5.4e-05	3.5e-05	6.25e-05	3.1e-05	-1e-06	9.3e-05
AGGKAGKDSGKAKAKAVSR(H2AV_1_19)	H2AV_1_19 K4acK11acK15ac	0.000289	0.000772	0.000157	0.000135	0.000401	7.55e-05	0	5.7e-05	1e-05	1e-06	1e-06	6.45e-05	2e-06	1.2e-05	0.000949	0.000241	1e-05	2.2e-05	6e-06	0.000547	4e-06	3.3e-05	7e-06	0.01318	0.008047	2e-06	2.5e-06	1e-06	1e-06	1e-06	0	1.3e-05	0.001352	1.3e-05	8e-06	4.05e-05	0.000104	0.000109	3.6e-05	0.000349	0.001094	0.000601	5.4e-05	3.5e-05	6.25e-05	3.1e-05	-1e-06	9.3e-05
AGGKAGKDSGKAKAKAVSR(H2AV_1_19)	H2AV_1_19 K4acK7acK15ac	0.000204	0.000366	0.0001055	6.6e-05	0.000282	0.0001105	1e-06	8.7e-05	1.45e-05	2e-06	2e-06	4.25e-05	5e-06	2.9e-05	0.000558	0.000357	2.2e-05	3.5e-05	1e-05	0.00074	6e-06	4.9e-05	1.2e-05	0.016603	0.006542	3e-06	6e-06	2e-06	2e-06	1.5e-06	1e-06	2.2e-05	0.0009955	2.9e-05	1.3e-05	6.9e-05	0.000153	0.000171	5.8e-05	0.000494	0.000846	0.000424	8.4e-05	5.6e-05	0.000103	5.1e-05	0	0.000141
AGGKAGKDSGKAKAKAVSR(H2AV_1_19)	H2AV_1_19 K4acK7acK11ac	0.000121	0.000289	0.000184	5e-05	0.000223	3.7e-05	1e-06	0.000119	2.7e-05	4e-06	3e-06	0.0001605	7e-06	3.9e-05	0.001434	0.000592	3.1e-05	4.7e-05	2.1e-05	0.001336	1.8e-05	8.9e-05	3.3e-05	0.0197225	0.009849	5e-06	9e-06	5e-06	3e-06	2.5e-06	1e-06	2.9e-05	0.003204	4.2e-05	1.9e-05	9.2e-05	0.000202	0.000294	7.6e-05	0.000598	0.001581	0.001027	0.000144	9.7e-05	0.000179	7.3e-05	0	0.0001905
AGGKAGKDSGKAKAKAVSR(H2AV_1_19)	H2AV_1_19 K4acK7acK11acK15ac	0.00272	3e-06	1.5e-06	1e-06	3e-06	4.5e-06	0.000322	0.000495	5.55e-05	0.000109	0.000168	0.000464	0	1e-06	1e-06	0.013709	0.00027	1e-06	0.006644	0.031548	0	0.132666	0	6.5e-06	1.1e-05	4e-05	0	0	0	0.000122	1.8e-05	0.000857	3.95e-05	0.005491	0.000373	0.000238	0	3e-06	2e-06	2e-06	2e-06	0.000321	2e-06	1e-06	0.001614	0	2e-06	0.000319
AGGKAGKDSGKAKTKAVSR(H2AZ_1_19)	H2AZ_1_19 unmod	0.841625	0.850757	0.874344	0.863319	0.8846	0.798709	0.909497	0.908324	0.957477	0.952339	0.938433	0.907156	0.923805	0.86435	0.916627	0.81888	0.881708	0.898423	0.910265	0.932331	0.9748	0.648029	0.811623	0.98858	0.829982	0.962222	0.948774	0.665095	0.882909	0.900648	0.908247	0.929444	0.844932	0.871057	0.924487	0.902865	0.882906	0.809986	0.840167	0.854501	0.883747	0.821487	0.828071	0.832311	0.739849	0.926405	0.957898	0.901338
AGGKAGKDSGKAKTKAVSR(H2AZ_1_19)	H2AZ_1_19 K4ac	0.017816	0.024831	0.014198	0.011498	0.013149	0.029037	0.041076	0.032446	0.0120945	0.025566	0.00955	0.015558	0.012924	0.010505	0.0353345	0.034973	0.008091	0.013498	0.024567	0.01079	0.009725	0.036515	0.046541	0.0073495	0.063211	0.003254	0.019767	0.011539	0.045082	0.0384515	0.010129	0.016131	0.0114425	0.041819	0.022109	0.027627	0.012609	0.018345	0.027832	0.022601	0.010032	0.009312	0.026093	0.016	0.0363325	0.003133	0.011235	0.022389
AGGKAGKDSGKAKTKAVSR(H2AZ_1_19)	H2AZ_1_19 K7ac	0.004996	3.3e-05	0.02505	0.035723	0.020208	0.0457065	0.019656	0.035199	0.006607	0.006397	0.027001	0.045425	0.002425	0.0572	0.0187645	0.013869	0.019969	0.026695	0.023019	0.006242	0.005013	0.177039	0.053216	0.001617	0.036678	0.000256	0.0102585	0.181698	0.031539	0.031347	0.044558	0.0334	0.0714595	0.031782	2e-05	0.0285355	0.035024	0.047039	0.000129	0.037762	0.035214	0.027213	0.036634	0.022737	0.0217025	0.01282	0.009813	0.0121215
AGGKAGKDSGKAKTKAVSR(H2AZ_1_19)	H2AZ_1_19 K11ac	0.02837	0.032038	0.010595	0.000124	0.015244	0.0025105	0.021073	0.008615	0.006069	0.015572	0.015343	0.0193175	0.002792	0.024308	0.003878	0.011477	0.024443	0.019868	0.014473	0.004884	0.0044575	0.092988	0.043197	0.001378	0.021953	0.00016	0.006277	0.132897	0.018874	0.016116	0.024382	0.00544	0.0085175	0.022237	0.035117	0.016725	0.003311	0.011207	0.022921	0.0069	0.005044	0.000616	0.00976	0.011284	0.018965	0.002773	0.004607	0.010903
AGGKAGKDSGKAKTKAVSR(H2AZ_1_19)	H2AZ_1_19 K15ac	3.1e-05	0.000163	3.55e-05	0.022461	7.2e-05	0.006181	0	0.000945	0.014803	0	0	0.001868	0.016577	0.002744	0.003499	0.00336	2e-06	0.0008825	0.00333	0.000431	8.6e-05	0.000208	0.009655	0.0001405	0.003277	3.9e-05	0.000334	0	0.005754	0.003896	5.2e-05	0.001425	0.0003685	0.019423	0.001245	0.0014245	6e-06	0.000148	7.8e-05	0.00202	0.001427	9e-06	0.001483	0.002608	0.0012455	0.000763	0.008978	1e-06
AGGKAGKDSGKAKTKAVSR(H2AZ_1_19)	H2AZ_1_19 K4acK7ac	0.106564	0.086125	0.070889	0.061901	0.062319	0.114862	0.001143	0.006495	0.00032	1.9e-05	1.8e-05	0.003979	0.006904	0.03871	0.0102855	0.089789	0.057498	0.0389335	0.020467	0.035846	0.000973	0.030165	0.027299	3.3e-05	4.3e-05	0.005675	0.0005385	0.000839	0.002636	0.0012765	0.001905	0.012261	0.02237	0	0.014928	0.015327	0.060408	0.098168	0.100892	0.074514	1e-06	0.13791	0.09465	0.112511	0.161154	0.053805	0.001236	0.0517915
AGGKAGKDSGKAKTKAVSR(H2AZ_1_19)	H2AZ_1_19 K4acK11ac	1e-06	1e-06	1e-06	1e-06	1e-06	1e-06	0.001143	1e-06	0.00032	1.9e-05	1.8e-05	0.000686	0.006904	0	6.75e-05	1e-06	0	5e-07	0	0	0.000973	0	0	3.3e-05	4.3e-05	0.005675	0.0005385	0.000839	0.002636	0.0012765	0.001905	0	0.003542	0	0	0.0005305	0	1e-06	1e-06	1e-06	1e-06	0	1e-06	0	5e-07	0	0.001236	0
AGGKAGKDSGKAKTKAVSR(H2AZ_1_19)	H2AZ_1_19 K4acK15ac	1e-06	1e-06	1e-06	1e-06	1e-06	1e-06	0.001143	1e-06	0.00032	1.9e-05	1.8e-05	0.000686	0.006904	0	6.75e-05	1e-06	0	5e-07	0	0	0.000973	0	0	3.3e-05	4.3e-05	0.005675	0.0005385	0.000839	0.002636	0.0012765	0.001905	0	0.003542	0	0	0.0005305	0	1e-06	1e-06	1e-06	1e-06	0	1e-06	0	5e-07	0	0.001236	0
AGGKAGKDSGKAKTKAVSR(H2AZ_1_19)	H2AZ_1_19 K7acK11ac	1e-06	1e-06	1e-06	1e-06	1e-06	1e-06	0.001143	1e-06	0.00032	1.9e-05	1.8e-05	0.000686	0.006904	0	6.75e-05	1e-06	0	5e-07	0	0	0.000973	0	0	3.3e-05	4.3e-05	0.005675	0.0005385	0.000839	0.002636	0.0012765	0.001905	0	0.003542	0	0	0.0005305	0	1e-06	1e-06	1e-06	0.057404	0	1e-06	0	5e-07	0	0.001236	0
AGGKAGKDSGKAKTKAVSR(H2AZ_1_19)	H2AZ_1_19 K7acK15ac	1e-06	1e-06	1e-06	1e-06	1e-06	1e-06	0.001143	1e-06	0.00032	1.9e-05	1.8e-05	0.000686	0.006904	0	6.75e-05	1e-06	0	5e-07	0	0	0.000973	0	0	3.3e-05	4.3e-05	0.005675	0.0005385	0.000839	0.002636	0.0012765	0.001905	0	0.003542	0	0	0.0005305	0	1e-06	1e-06	1e-06	1e-06	0	1e-06	0	5e-07	0	0.001236	0
AGGKAGKDSGKAKTKAVSR(H2AZ_1_19)	H2AZ_1_19 K11acK15ac	1e-06	1e-06	1e-06	1e-06	1e-06	1e-06	0.001143	1e-06	0.00032	1.9e-05	1.8e-05	0.000686	0.006904	0	6.75e-05	0.000468	0.002321	5e-07	0.000647	0.000541	0.000973	0.000293	0.002433	3.3e-05	4.3e-05	0.005675	0.0005385	0.000839	0.002636	0.0012765	0.001905	0	0.003542	0	0.000705	0.0005305	0.000923	1e-06	1e-06	1e-06	1e-06	0	1e-06	0	0.003516	0	0.001236	0
AGGKAGKDSGKAKTKAVSR(H2AZ_1_19)	H2AZ_1_19 K7acK11acK15ac	0	0.002071	0.0003175	0.001909	0	0.0002315	0.000486	0	5.25e-05	4e-06	0.002406	3.95e-05	1.3e-05	0.000482	-5e-07	0.001843	0.000718	0.0003745	8e-05	8.6e-05	5e-07	9.1e-05	0.000241	1.9e-05	0.00058	0	0.0008995	2.7e-05	0	6.1e-05	0.000117	0.00018	0.0014845	0.000512	0.000269	0.000948	0.001753	0.006759	0.002643	2.2e-05	0.002769	5e-06	1.8e-05	9e-06	0.0059105	2e-06	1.6e-05	1.5e-06
AGGKAGKDSGKAKTKAVSR(H2AZ_1_19)	H2AZ_1_19 K4acK11acK15ac	0	0.001374	0.0001705	0.001004	-1e-06	0.0001645	0.000275	-1e-06	3.4e-05	0	0.001596	1.15e-05	1e-05	0.000187	-1.5e-06	0.000842	0.00044	0.0001985	0.0001	0.000186	1e-06	0.000646	0.00035	2.5e-05	1.5e-05	0	0.0001245	2e-05	0	3.85e-05	3.8e-05	0.00015	0.001004	0.000279	0.000149	0.0005095	0.001087	0.004391	0.002056	1.5e-05	0.001869	3e-06	1.3e-05	7e-06	0.002394	2e-06	2.1e-05	1.5e-06
AGGKAGKDSGKAKTKAVSR(H2AZ_1_19)	H2AZ_1_19 K4acK7acK15ac	1.7e-05	0.00159	0.0003975	0.001408	0.000349	0.000174	0.000669	9.7e-05	2.4e-05	2e-06	0.00274	3.45e-05	7e-06	0.000341	0.006564	0.002193	0.00062	0.0003	0.000233	0.00091	1.9e-05	0.002136	0.000857	0.0001325	0.001281	5e-06	0.0015605	3.4e-05	8e-06	0.000188	0.000187	0.000226	0.0019465	0.001421	0.000379	0.0011175	0.001294	0.003059	0.002341	0.000116	0.002151	1.3e-05	0.000193	0.0001	0.003169	3.5e-05	8e-06	0.000118
AGGKAGKDSGKAKTKAVSR(H2AZ_1_19)	H2AZ_1_19 K4acK7acK11ac	0.000563	0.000987	0.001129	0.000638	0.00403	0.0022585	0.000412	0.007868	0.000912	6e-06	0.00209	0.0024295	2.6e-05	0.000899	0.0046735	0.004401	0.002624	0.0007755	0.002055	0.00435	5.65e-05	0.008928	0.004576	0.000521	0.008099	1.1e-05	0.008772	0.001309	1.8e-05	0.0015935	0.000829	0.000381	0.0185165	0.002335	0.000593	0.002033	0.000181	0.000892	0.00073	0.001544	0.000257	0.001142	0.0028	0.002307	0.0046265	0.000261	0	0.0013035
AGGKAGKDSGKAKTKAVSR(H2AZ_1_19)	H2AZ_1_19 K4acK7acK11acK15ac	1.3e-05	2.5e-05	0.00287	1.1e-05	2.3e-05	0.00016	1e-06	9e-06	9e-06	0	0.000732	0.0007515	0	0.000272	3.8e-05	0.017904	0.001565	5.05e-05	0.000763	0.003404	4e-06	0.002962	1.1e-05	3.85e-05	0.034666	1e-06	1e-06	0.002345	1e-06	5e-07	2.9e-05	0.000961	0.000247	0.009135	0	0.000234	0.000497	0	0.000206	-1e-06	8e-05	0.002289	0.000281	0.000126	0.001133	1e-06	6e-06	3.2e-05
AKAKTR(H2A1_12_17)	H2A1_12_17 unmod	0.578354	0.52954	0.580268	0.576554	0.5625	0.560969	0.622408	0.584684	0.575847	0.58317	0.483082	0.588046	0.478334	0.571923	0.558025	0.59213	0.584676	0.574211	0.434709	0.581664	0.544677	0.587067	0.572103	0.558821	0.544885	0.535502	0.597279	0.58252	0.543809	0.573548	0.464129	0.461865	0.580202	0.544982	0.475136	0.626777	0.521787	0.577559	0.467559	0.530105	0.481666	0.630794	0.52842	0.574835	0.609464	0.593993	0.524178	0.591487
AKAKTR(H2A1_12_17)	H2A1_12_17 K13ac	0.000316	0.000307	0.0002525	0.000443	0.000319	0.0007165	0.000373	0.000171	0.0004995	0.000245	0.000299	0.000312	0.00042	0.000214	0.0005795	0.000254	0.000124	0.000213	0.000365	0.000322	0.0005635	0.000189	0.000287	0.0012165	0.000166	0.000242	0.000962	0.000209	0.000317	0.0002085	0.000164	0.000261	0.000587	0.00089	0.000258	0.000296	0.000198	0.000753	0.00027	0.000406	0.000234	0.000122	0.000442	0.000313	0.000941	9.1e-05	0.001167	0.00029
AKAKTR(H2A1_12_17)	H2A1_12_17 K15ac	0.410029	0.455601	0.398902	0.409737	0.418378	0.429654	0.360359	0.399284	0.405813	0.411486	0.511774	0.397406	0.507013	0.406292	0.42603	0.382749	0.399278	0.409659	0.550406	0.397221	0.443723	0.400771	0.403944	0.42927	0.429879	0.445933	0.380617	0.411027	0.445962	0.411897	0.530026	0.52482	0.397902	0.450231	0.514299	0.355991	0.470433	0.410296	0.51934	0.462191	0.509039	0.346653	0.462722	0.412351	0.365814	0.393664	0.450988	0.39392
AKAKTR(H2A1_12_17)	H2A1_12_17 K13acK15ac	0.011217	0.014397	0.0204335	0.0132	0.018697	0.008642	0.016859	0.015843	0.016802	0.005087	0.004833	0.0110925	0.013085	0.021438	0.012043	0.024762	0.015843	0.0159125	0.014496	0.020433	0.010479	0.01191	0.023622	0.010336	0.013975	0.017867	0.019399	0.005951	0.009663	0.013933	0.00543	0.010923	0.0212015	0.002584	0.009889	0.0168285	0.005923	0.011225	0.012353	0.007089	0.007127	0.022314	0.008218	0.01225	0.0232955	0.01224	0.023415	0.014286
AKAKTR(H2A1_12_17)	H2A1_12_17 K15me1	8.4e-05	8.1e-05	5.15e-05	3.7e-05	8.1e-05	1.05e-05	0	7e-06	0.000536	5e-06	2e-06	0.0018345	0.000593	5.4e-05	0.001927	4.6e-05	3.2e-05	4.5e-06	7e-06	0.000205	0.000324	1e-06	1.6e-05	0.0001945	0	0.000455	0.00018	0.000292	0.000247	0.0004135	0	0.002129	5e-07	0.001312	0.000201	5.35e-05	0	2.8e-05	0.000475	0.000208	0	9e-06	0.000196	0.00025	0.0001465	8e-06	0.000179	6.5e-06
AKAKTR(H2A1_12_17)	H2A1_12_17 K13me1	0	7.3e-05	9.2e-05	2.8e-05	2.4e-05	8.5e-06	0	1e-05	0.000502	6e-06	1.1e-05	0.0013095	0.000555	7.9e-05	0.001396	5.9e-05	4.7e-05	5e-07	1.6e-05	0.000155	0.0002345	6.2e-05	2.9e-05	0.0001615	0.011095	0	0.0015635	1e-06	1e-06	5e-07	0.000252	2e-06	0.000107	1e-06	0.000216	5.4e-05	0.001659	0.000139	3e-06	2e-06	0.001933	0.000107	2e-06	1e-06	0.0003375	3e-06	7.2e-05	9.5e-06
AKAKSR(H2A3_12_17)	H2A3_12_17 unmod	0.477958	0.477435	0.425569	0.469944	0.443062	0.44051	0.389747	0.400696	0.448639	0.448101	0.547771	0.397646	0.555747	0.42628	0.44005	0.407867	0.438056	0.452226	0.62583	0.434367	0.473284	0.426785	0.450095	0.463228	0.465062	0.438113	0.398204	0.445844	0.52524	0.465048	0.554552	0.570076	0.408232	0.529489	0.535185	0.370991	0.54238	0.434447	0.546228	0.461499	0.578928	0.373653	0.459756	0.405791	0.381887	0.432548	0.467615	0.435131
AKAKSR(H2A3_12_17)	H2A3_12_17 K13ac	0.001149	0.000406	0.0001625	0.000234	0.000156	0.0002785	0.000104	0.001039	0.000159	6.1e-05	1.3e-05	0.000777	0.000218	0.000283	0.00018	0.000699	0.000211	0.001198	0.000412	0.000788	0.0010235	4.8e-05	0.00056	0.000473	0.000233	0.001771	0.0002755	0.000317	2e-06	0.000591	0.000506	0.000159	0.000152	0.000439	0.00015	0.0019745	0.000201	0.000127	0.00124	0.000118	4.8e-05	0.000899	0.000172	0.001301	0.000478	0.000134	2e-06	0.0001295
AKAKSR(H2A3_12_17)	H2A3_12_17 K15ac	0.0114	0.012937	0.0184255	0.015278	0.016854	0.008539	0.018431	0.013134	0.017592	0.00411	0.004516	0.0082825	0.011901	0.020133	0.0110755	0.023085	0.013626	0.0148395	0.011781	0.019775	0.009921	0.01124	0.02199	0.0093285	0.012389	0.016768	0.01779	0.005743	0.010087	0.014044	0.005108	0.009871	0.018887	0.002551	0.009267	0.013992	0.006099	0.010584	0.011652	0.005926	0.007364	0.018872	0.007785	0.011665	0.021748	0.011163	0.021768	0.0147105
AKAKSR(H2A3_12_17)	H2A3_12_17 K13acK15ac	0.004883	0.004654	0.008038	0.006035	0.007873	0.0064155	0.008623	0.007278	0.012415	0.000687	0.002318	0.003168	0.010684	0.011669	0.0039105	0.011965	0.009314	0.011341	0.013799	0.010273	0.0037005	0.00775	0.009276	0.0050525	0.006219	0.012705	0.0086795	0.003663	0.008135	0.007679	0.003916	0.010956	0.00914	0.001667	0.013504	0.0048035	0.003197	0.003485	0.012352	0.005399	0.00236	0.006438	0.004863	0.006499	0.0109725	0.005888	0.016426	0.0033245
AKAKSR(H2A3_12_17)	H2A3_12_17 K15me1	0.504423	0.504567	0.547728	0.50851	0.532055	0.544098	0.582947	0.577838	0.521196	0.546915	0.445355	0.589884	0.420805	0.540992	0.544439	0.556384	0.538793	0.520277	0.347966	0.534256	0.511413	0.553957	0.518078	0.521918	0.515829	0.530605	0.575033	0.544161	0.456139	0.512636	0.43592	0.408937	0.562307	0.465853	0.441895	0.607009	0.448082	0.551357	0.428528	0.527023	0.411268	0.600127	0.527312	0.574719	0.584414	0.550263	0.494189	0.546701
AKAKSR(H2A3_12_17)	H2A3_12_17 K13me1	0.000187	0	7.65e-05	0	0	0.000159	0.000149	1.6e-05	0	0.000125	2.8e-05	0.000242	0.000645	0.000643	0.0003445	0	0	0.0001185	0.000212	0.00054	0.0006585	0.000221	1e-06	0	0.000267	3.9e-05	1.85e-05	0.00027	0.000396	1e-06	0	1e-06	0.0012825	1e-06	1e-06	0.00123	4.1e-05	0	0	3.5e-05	3.3e-05	1.1e-05	0.000112	2.5e-05	0.000501	5e-06	0	3e-06
DNKKTR(H2A1_72_77)	H2A1_72_77 unmod	0.998745	0.999829	0.999478	0.997945	0.999786	0.997038	0.99866	0.997465	0.993556	0.999027	0.997934	0.999955	0.997447	0.994032	0.99982	0.999879	0.99837	0.998903	0.99996	0.999417	0.997138	0.99918	0.999626	0.995601	0.997452	0.999227	0.996435	0.998764	0.998696	0.99934	0.999808	0.997299	0.999373	0.99639	0.999943	0.996597	0.999138	0.999695	0.999565	0.999484	0.999226	0.999332	0.99951	0.99524	0.996052	0.999277	0.999413	0.998583
DNKKTR(H2A1_72_77)	H2A1_72_77 K74ac	0.001255	0.000171	0.000522	0.002055	0.000214	0.002962	0.00134	0.002535	0.0064445	0.000973	0.002066	4.45e-05	0.002553	0.005968	0.00018	0.000121	0.00163	0.0010975	4e-05	0.000583	0.0028625	0.00082	0.000374	0.004399	0.002548	0.000773	0.0035655	0.001236	0.001304	0.0006605	0.000192	0.002701	0.000627	0.00361	5.7e-05	0.003403	0.000862	0.000305	0.000435	0.000516	0.000774	0.000668	0.00049	0.00476	0.003948	0.000723	0.000587	0.0014175
HLQLAIR(H2A_82_88)	H2A_82_88 unmod	1	1	1	1	1	1	1	1	1	1	1	1	1	1	1	1	1	1	1	1	1	1	1	1	1	1	1	1	1	1	1	1	1	1	1	1	1	1	1	1	1	1	1	1	1	1	1	1
unmod(H2A_1_88)	H2A_1_88 H2A14s.HLQLAIR	0.916537	0.906568	0.91712	0.924579	0.911021	0.902274	0.934473	0.952077	0.911187	0.940593	0.932427	0.949067	0.931955	0.947807	0.957329	0.966807	0.947907	0.936902	0.93826	0.957835	0.924437	0.957661	0.956069	0.90752	0.930596	0.939943	0.936937	0.932152	0.948608	0.513992	0.952764	0.948031	0.942653	0.943528	0.934914	0.948106	0.933329	0.922405	0.895445	0.944452	0.908378	0.944493	0.944139	0.954186	0.928503	0.913963	0.823689	0.918505
unmod(H2A_1_88)	H2A_1_88 H2AZ.AGGKAGKDSGKAKTKAVSR	0.044619	0.036757	0.0368025	0.028514	0.03868	0.04376	0.034006	0.02356	0.031228	0.0242	0.030262	0.0199045	0.021837	0.020662	0.0129285	0.011226	0.022279	0.027951	0.040323	0.016208	0.02371	0.026232	0.015028	0.021441	0.018651	0.022015	0.02008	0.039994	0.026283	0.287811	0.017776	0.032703	0.0200135	0.016855	0.036609	0.011977	0.024626	0.031542	0.042808	0.018929	0.033212	0.028909	0.022183	0.018758	0.0206715	0.032914	0.056311	0.0312285
unmod(H2A_1_88)	H2A_1_88 H2AY.SAKAGVIFPVGR	0.002543	0.003324	0.003882	0.006332	0.003124	0.006415	0.004881	0.002558	0.0024855	0.002307	0.004516	0.002145	0.004836	0.001542	0.001831	0.002043	0.002843	0.005497	0.006785	0.00722	0.004381	0.002957	0.002004	0.0028795	0.000363	0.002936	0.002732	0.003243	0.005557	0.0326455	0.002665	0.002929	0.005096	0.004347	0.003279	0.002841	0.002768	0.003193	0.010029	0.004698	0.004953	0.004109	0.00352	0.004401	0.003407	0.002788	0.002942	0.0040765
unmod(H2A_1_88)	H2A_1_88 H2AX.GKTGGKAR	0.036301	0.05335	0.0421955	0.040575	0.047174	0.0475505	0.02664	0.021804	0.0551	0.032899	0.032795	0.0288845	0.041372	0.029989	0.0279125	0.019925	0.02697	0.02965	0.014632	0.018737	0.047472	0.01315	0.0269	0.06816	0.05039	0.035106	0.0402505	0.024611	0.019552	0.165552	0.026795	0.016337	0.032238	0.035271	0.025198	0.0370755	0.039277	0.04286	0.051718	0.031922	0.053456	0.022489	0.030158	0.022655	0.0474185	0.050335	0.117058	0.04619
unmod(H2B_1_29)	H2B_1_29 1C.PEPAKSAPAPKKGSKKAVTKAQKKDGKKR	0.714896	0.737651	0.722857	0.393206	0.710204	0.664269	0.603948	0.655781	0.759726	0.649551	0.656266	0.554132	0.566465	0.619159	0.741699	0.626148	0.647856	0.683069	0.576315	0.536216	0.66213	0.492744	0.637803	0.767811	0.627471	0.615441	0.719228	0.540436	0.54053	0.549906	0.719601	0.689843	0.722199	0.676465	0.480166	0.628464	0.721682	0.647759	0.629212	0.639504	0.761589	0.689784	0.671318	0.584595	0.700438	0.680638	0.702027	0.709703
unmod(H2B_1_29)	H2B_1_29 1H.PDPAKSAPAPKKGSKKAVTKAQKKDGKKR	0.068622	0.07485	0.092097	0.127519	0.098426	0.107149	0.092773	0.078664	0.0721645	0.093171	0.090951	0.142251	0.055468	0.136028	0.099043	0.161324	0.108064	0.0838585	0.08917	0.11236	0.136354	0.125493	0.114605	0.0566795	0.031092	0.113354	0.123552	0.131418	0.145059	0.150822	0.081394	0.062576	0.108686	0.069637	0.123555	0.114352	0.093311	0.107348	0.076814	0.105948	0.073201	0.088469	0.113372	0.149537	0.092237	0.114946	0.110635	0.143147
unmod(H2B_1_29)	H2B_1_29 2F.PDPAKSAPAPKKGSKKAVTKVQKKDGKKR	0.058393	0.004444	0.032858	0.102659	0.044225	0.030606	0.081437	0.072505	0.025907	0.030645	0.045371	0.036807	0.079786	0.067901	0.055398	0.075381	0.077714	0.04538	0.123524	0.13855	0.027739	0.099751	0.054077	0.02484	0.020832	0.041958	0.020897	0.063463	0.045328	0.0620685	0.048901	0.038911	0.0533725	0.064158	0.089472	0.069587	0.051718	0.043689	0.052663	0.04096	0.039618	0.051195	0.054834	0.062725	0.033838	0.052803	0.039823	0.026406
unmod(H2B_1_29)	H2B_1_29 1B.PEPSKSAPAPKKGSKKAITKAQKKDGKKR	0.015329	0.066671	0.00586	0.150891	0.015909	0.085647	0.018779	0.022608	0.032923	0.0695	0.01254	0.081451	0.03241	0.0258	0.011762	0.017272	0.036669	0.041065	0.050456	0.024313	0.026931	0.065084	0.038554	0.012892	0.006034	0.033935	0.0211545	0.094415	0.087325	0.04796	0.01093	0.083312	0.017881	0.01207	0.051413	0.0514915	0.012705	0.007773	0.097622	0.07903	0.010356	0.022886	0.015224	0.032523	0.056306	0.02735	0.050132	0.0173885
unmod(H2B_1_29)	H2B_1_29 1N.PEPSKSAPAPKKGSKKAVTKAQKKDGKKR	0.025948	0.023858	0.0358305	0.059296	0.035098	0.0268265	0.030666	0.026463	0.0174175	0.033983	0.038198	0.0365215	0.049501	0.02872	0.0133095	0.018221	0.026144	0.035715	0.044779	0.041949	0.014192	0.060602	0.040868	0.0110465	0.003814	0.030526	0.0196025	0.055019	0.047913	0.055895	0.035362	0.043833	0.02406	0.030254	0.080776	0.0239885	0.033763	0.032896	0.027354	0.036776	0.028321	0.034989	0.013614	0.053126	0.021916	0.030422	0.008358	0.0335585
unmod(H2B_1_29)	H2B_1_29 1D.PEPTKSAPAPKKGSKKAVTKAQKKDGKKR	0.061492	0.048237	0.083415	0.113841	0.072065	0.0586965	0.123563	0.121308	0.0508955	0.082833	0.112946	0.119946	0.180946	0.095513	0.0371575	0.070844	0.071629	0.0821575	0.095871	0.10546	0.0929375	0.111736	0.093932	0.0367585	0.293073	0.127473	0.040677	0.085873	0.10442	0.106079	0.087066	0.06744	0.0537565	0.09428	0.110265	0.0732425	0.065587	0.132613	0.091745	0.0709	0.058149	0.060901	0.104452	0.084064	0.0504675	0.072826	0.059037	0.052062
unmod(H2B_1_29)	H2B_1_29 1M.PEPVKSAPVPKKGSKKAINKAQKKDGKKR	0.019726	0.014907	0.0090005	0.028502	0.014352	0.0111935	0.010479	0.008714	0.0093755	0.019013	0.016136	0.020423	0.006289	0.010291	0.0080255	0.010647	0.013788	0.0194005	0.01457	0.019514	0.017301	0.014036	0.014123	0.0055215	0.013305	0.016193	0.021282	0.015476	0.018988	0.0183085	0.006971	0.006694	0.006048	0.019454	0.045893	0.012038	0.006207	0.005534	0.008335	0.012725	0.008245	0.029889	0.01031	0.013299	0.024439	0.00929	0.007431	0.009424
unmod(H2B_1_29)	H2B_1_29 1L.PELAKSAPAPKKGSKKAVTKAQKKDGKKR	0.035594	0.029381	0.018083	0.024087	0.00972	0.015612	0.038355	0.013956	0.0315905	0.021305	0.027592	0.008469	0.029134	0.016588	0.033606	0.020164	0.018137	0.0093545	0.005315	0.021638	0.022415	0.030554	0.006038	0.0844525	0.004379	0.021122	0.033607	0.013901	0.010437	0.008961	0.009774	0.007391	0.013998	0.033681	0.018461	0.0268365	0.015028	0.022387	0.016256	0.014156	0.020521	0.021887	0.016875	0.020131	0.020359	0.011726	0.022557	0.0083115
[truncated: 34 more columns]

## Sheet: PTMs
PTM	C01	M01	T01	C02	M02	T02	C03	M03	T03	C04	M04	T04	C05	M05	T05	C06	M06	T06	C07	M07	T07	C08	M08	T08	C09	M09	T09	C10	M10	T10	C11	M11	T11	C12	M12	T12	C13	M13	T13	C14	M14	T14	C15	M15	T15	C16	M16	T16	C17
H3K4me1	0.101506	0.107959	0.0874735	0.101468	0.081873	0.0734865	0.067298	0.020627	0.0881575	0.073329	0.305284	0.0740205	0.18404	0.06547	0.139649	0.065991	0.055938	0.068407	0.076203	0.083118	0.156312	0.046314	0.052241	0.099585	0.099163	0.07608	0.058812	0.107763	0.099416	0.094841	0.112428	0.086917	0.078963	0.07661	0.126386	0.150067	0.098983	0.135316	0.096089	0.119892	0.115009	0.058861	0.099106	0.082824	0.0869935	0.092965	0.152588	0.0846265	0.094305
H3K4me2	1.3e-05	0.000204	0.0001615	0.000753	0.000303	0.00014	9e-06	0.001089	4.9e-05	3e-06	0.000303	0.000858	2.2e-05	1.5e-05	0.00738	0.000252	1.1e-05	5.5e-05	6.7e-05	6.1e-05	9.75e-05	0.008936	0.000189	0.004219	0.001043	9e-05	0.001166	0.001308	0.000476	1.5e-06	0.000588	8.1e-05	9.8e-05	0.000157	0.000178	0.0021365	0.001513	2e-06	0.000347	0.000124	0.001214	0.000158	0.000189	7.2e-05	0.000369	8.3e-05	0	6.6e-05	8.3e-05
H3K4me3	0	0	3.3e-05	1e-05	1.5e-05	5e-07	0	1.1e-05	0	0	1e-06	4.5e-06	0	3e-06	0.000141	0	1e-06	1e-06	1e-06	0	0	2.3e-05	0	0.0002945	0.002827	0	0	0	0	0	0	3e-06	0	1e-06	8.1e-05	2.55e-05	2e-06	0	1.6e-05	0	0	2e-06	7e-06	5e-06	2.95e-05	1e-06	0	2e-06	1e-06
H3K4ac	0.001071	0.000852	0.0016235	0.000701	0.000926	0.001189	0.003346	0.003733	0.0026035	5.6e-05	0.001098	0.000247	0.002192	0.000586	0.004681	0.001156	0.001632	0.0014145	0.002414	0.002808	0.001371	0.001366	0.001888	0.0011685	0.000145	0.003135	0.0035995	0.000262	0.000926	0.0007	0.000835	0.001085	0.004333	0.000566	0.001774	0.0012115	0.002566	0.002857	0.00069	0.000576	0.000208	0.002918	0.000688	0.006321	0.0034095	0.000982	0.000494	0.0001815	0.002252
H3K9me1	0.20484	0.215137	0.219819	0.175739	0.192604	0.226547	0.211647	0.239822	0.19019	0.181619	0.198619	0.190881	0.204655	0.189124	0.1806	0.223145	0.204131	0.148681	0.190523	0.177312	0.237106	0.176422	0.161154	0.144975	0.170633	0.216321	0.1661	0.278984	0.156981	0.20881	0.250266	0.224237	0.161756	0.205303	0.234575	0.20062	0.206206	0.246249	0.184694	0.212656	0.189017	0.159425	0.225092	0.231305	0.208675	0.259717	0.234986	0.209488	0.227658
H3K9me2	0.306683	0.285229	0.271952	0.27221	0.278435	0.30391	0.27224	0.314372	0.30109	0.286446	0.308397	0.292135	0.300871	0.160067	0.286999	0.238078	0.283077	0.371157	0.176909	0.300316	0.275139	0.219111	0.280935	0.342419	0.294735	0.207959	0.348334	0.165294	0.392188	0.29493	0.219434	0.253724	0.371304	0.25083	0.186899	0.285144	0.301155	0.26415	0.283278	0.28813	0.246828	0.408721	0.276594	0.292185	0.309665	0.227715	0.306594	0.276074	0.253703
H3K9me3	0.129826	0.108047	0.160591	0.124433	0.143317	0.113051	0.067572	0.126013	0.173753	0.145112	0.136964	0.189141	0.083069	0.100811	0.236648	0.180106	0.141065	0.118921	0.170916	0.069634	0.115091	0.205884	0.104744	0.244648	0.187361	0.194532	0.144666	0.06991	0.215663	0.130281	0.072105	0.09016	0.204428	0.139265	0.117028	0.142173	0.096962	0.068404	0.151209	0.136333	0.191491	0.165825	0.131748	0.124354	0.135405	0.104573	0.07749	0.114626	0.100777
H3K9ac	0.050092	0.031468	0.0129305	0.025029	0.02252	0.020443	0.055354	0.015496	0.018146	0.02568	0.035852	0.008849	0.070154	0.022405	0.0197305	0.010528	0.019533	0.016678	0.025929	0.008704	0.010341	0.087303	0.052383	0.0258475	0.045552	0.045875	0.0270775	0.010723	0.007434	0.0164635	0.058588	0.035376	0.0147155	0.015723	0.012234	0.028824	0.016586	0.018352	0.02443	0.029444	0.012814	0.020812	0.020735	0.019139	0.0200545	0.021198	0.023427	0.017613	0.023089
H3S10ph	0	0	0	0	0	0	0	0	0	0	0	0	0	0	0	0	0	0	0	0	0	0	0	0	0	0	0	0	0	0	0	0	0	0	0	0	0	0	0	0	0	0	0	0	0	0	0	0	0
H3K14ac	0.336414	0.252348	0.294301	0.28011	0.286349	0.244461	0.270328	0.247644	0.261918	0.275612	0.268455	0.267691	0.260234	0.240042	0.253304	0.257577	0.257439	0.291933	0.398215	0.251207	0.24591	0.318022	0.2394	0.254697	0.289445	0.205669	0.269305	0.253187	0.39701	0.239463	0.269066	0.251363	0.223899	0.426715	0.311755	0.258653	0.306312	0.2743	0.273712	0.281015	0.254191	0.240366	0.317102	0.295027	0.259777	0.317812	0.332692	0.276043	0.244272
H3K18me1	0.001567	0.001598	0.001659	0.00216	0.001527	0.002591	0.000836	0.001468	0.003022	0.00256	0.002434	0.0020915	0.002295	0.001231	0.0019955	0.000969	0.001481	0.0028875	0.003137	0.001594	0.003552	0.002608	0.001479	0.0076925	0.002011	0.001292	0.005534	0.001556	0.003459	0.0021495	0.001524	0.004721	0.0018095	0.003309	0.004053	0.0011305	0.00199	0.002351	0.002162	0.003725	0.001866	0.000879	0.002438	0.003523	0.0053365	0.001311	0.005224	0.0009485	0.001288
H3K18ac	0.048976	0.085868	0.0535165	0.046313	0.12974	0.0449825	0.113376	0.088068	0.074363	0.066014	0.095541	0.0594145	0.146696	0.111406	0.074154	0.02428	0.070423	0.0940115	0.056722	0.088762	0.067795	0.036809	0.166762	0.06302	0.067796	0.057476	0.07599	0.055228	0.099507	0.083166	0.09443	0.025719	0.042736	0.108711	0.074888	0.075579	0.064033	0.067833	0.068448	0.097831	0.043456	0.068838	0.098422	0.055398	0.07715	0.045127	0.089097	0.093579	0.06922
H3K23me1	0.001076	0.001229	9.9e-05	0.001007	0.000717	0.0006185	6.7e-05	0.000662	0.0018985	0.000337	0.000724	0.0011545	3.8e-05	9.4e-05	0.0003475	0.000566	0.000206	0.000896	1.6e-05	1.5e-05	0.0023545	1.8e-05	2.3e-05	0.0145955	0.002286	0.000874	0.005977	0.000761	1.3e-05	0.00038	7.9e-05	0.001737	0.0007305	0.000219	0.005668	0.000691	0.000412	0.000461	0.00078	0.001369	0.001004	0.000185	5.3e-05	0.001597	0.0032985	0.000484	5.8e-05	0.0004985	0.000275
H3K23ac	0.200409	0.163731	0.218279	0.259505	0.105541	0.220507	0.126344	0.226127	0.188039	0.222784	0.15732	0.223106	0.162147	0.196466	0.300617	0.25227	0.18228	0.188496	0.204306	0.189839	0.252358	0.221798	0.133652	0.159049	0.210214	0.164334	0.334065	0.220641	0.199781	0.217919	0.209404	0.300038	0.192452	0.254348	0.285263	0.193348	0.198254	0.216999	0.180816	0.211932	0.199461	0.226458	0.20424	0.257169	0.232791	0.203339	0.271125	0.232197	0.175941
H31K27me1	0.178612	0.254953	0.215541	0.241918	0.254326	0.229368	0.197301	0.184593	0.176816	0.254076	0.19646	0.225985	0.204483	0.138639	0.242776	0.204658	0.218556	0.11991	0.156564	0.291622	0.24967	0.216881	0.156028	0.180706	0.160024	0.200477	0.183819	0.272278	0.245363	0.173823	0.22047	0.171641	0.202847	0.202065	0.108511	0.217312	0.114353	0.204029	0.18664	0.189083	0.176631	0.182568	0.28168	0.332301	0.218194	0.194698	0.209617	0.242602	0.204934
H31K27me2	0.460238	0.42201	0.443925	0.405519	0.387637	0.381777	0.46257	0.405428	0.46343	0.378135	0.442046	0.405753	0.516337	0.56646	0.406703	0.430276	0.439137	0.433773	0.459271	0.401416	0.367407	0.384082	0.462077	0.35046	0.446112	0.378086	0.299916	0.437726	0.442891	0.465933	0.46471	0.514428	0.437387	0.478801	0.464151	0.399666	0.445194	0.31202	0.291531	0.334765	0.397812	0.537972	0.26345	0.244341	0.322885	0.472305	0.445462	0.455463	0.469347
H31K27me3	0.267746	0.242518	0.266741	0.252016	0.257658	0.273991	0.256943	0.333268	0.244958	0.254132	0.269499	0.283187	0.212284	0.246213	0.245314	0.231264	0.244585	0.386028	0.282781	0.150993	0.261358	0.243621	0.305545	0.386082	0.328072	0.313925	0.399338	0.195305	0.222011	0.297341	0.23553	0.262946	0.280995	0.214889	0.360399	0.249884	0.369431	0.278845	0.273148	0.362501	0.326098	0.261252	0.35334	0.354973	0.312839	0.254808	0.256515	0.190766	0.255057
H31K27ac	0.001045	0.005493	0.0042865	0.002964	0.005083	0.006799	0.008662	0.005561	0.013707	0.000508	0.000732	0.000607	0.004127	0.005738	0.0023475	0.004426	0.0076	0.003608	0.012386	0.009763	0.003179	0.01029	0.004714	0.0013145	0.003765	0.007899	0.003829	0.001215	0.004476	0.003808	0.003103	0.003829	0.003267	0.00079	0.002921	0.0043295	0.001689	0.014151	0.002245	0.007046	0.002587	0.001029	0.00458	0.013971	0.001322	0.003561	0.003729	0.003316	0.00254
H31K36me1	0.077209	0.100318	0.1013	0.09744	0.095164	0.120326	0.09594	0.091361	0.071431	0.093491	0.101641	0.165421	0.107072	0.095051	0.152059	0.051824	0.076216	0.084716	0.101362	0.086412	0.158579	0.080209	0.104402	0.139916	0.085768	0.071082	0.107395	0.130635	0.112742	0.076035	0.092796	0.099751	0.174646	0.073976	0.116127	0.0748415	0.135643	0.217803	0.008869	0.115316	0.171957	0.090002	0.09436	0.141057	0.179258	0.069159	0.083169	0.092895	0.104155
H31K36me2	0.155149	0.218517	0.186904	0.191028	0.202214	0.184481	0.157471	0.15001	0.147463	0.200401	0.174638	0.211639	0.154806	0.112661	0.178147	0.247057	0.178957	0.108159	0.144838	0.231936	0.166261	0.167793	0.162742	0.157295	0.142884	0.230482	0.195778	0.205809	0.180691	0.139224	0.174793	0.165103	0.224878	0.133589	0.058735	0.193536	0.299776	0.138679	0.151698	0.118702	0.241848	0.238229	0.247814	0.285019	0.253495	0.162235	0.150555	0.222545	0.163714
H31K36me3	0.067677	0.067362	0.075018	0.087699	0.095822	0.087133	0.062471	0.086123	0.074562	0.09143	0.060794	0.097259	0.06481	0.045843	0.10911	0.146176	0.094344	0.0545425	0.049983	0.109505	0.126145	0.110054	0.06758	0.086319	0.056503	0.094619	0.105904	0.090794	0.083295	0.057135	0.092553	0.045111	0.065227	0.078971	0.072283	0.10807	0.055154	0.134638	0.222915	0.111935	0.100239	0.044921	0.146963	0.100383	0.104938	0.063447	0.050131	0.0978495	0.067583
H33K27me1	0.068223	0.162497	0.126304	0.12504	0.138635	0.158645	0.260396	0.263893	0.173806	0.183991	0.157015	0.196846	0.302493	0.361191	0.376891	0.37421	0.287894	0.280759	0.288796	0.350351	0.329352	0.266304	0.301351	0.392774	0.275596	0.30812	0.364077	0.362934	0.349712	0.328143	0.283782	0.2593	0.319963	0.412481	0.244916	0.30315	0.219934	0.48731	0.453991	0.183414	0.434179	0.252987	0.356392	0.344091	0.252126	0.231229	0.275431	0.204266	0.286293
H33K27me2	0.802952	0.712841	0.748903	0.755846	0.757262	0.695179	0.4935	0.508728	0.686557	0.61329	0.640135	0.592854	0.322745	0.262494	0.299841	0.247727	0.301026	0.348274	0.38402	0.217944	0.260972	0.411368	0.277124	0.260821	0.246358	0.270701	0.242745	0.284416	0.319054	0.296482	0.33396	0.53521	0.238656	0.294151	0.35292	0.251482	0.254342	0.336769	0.098412	0.384113	0.293572	0.342394	0.29332	0.27449	0.443925	0.518869	0.443543	0.656525	0.380371
H33K27me3	0.097322	0.082651	0.0926835	0.083596	0.073869	0.0883575	0.147401	0.14966	0.0908475	0.170845	0.149747	0.137235	0.290852	0.218007	0.182081	0.175716	0.226845	0.274243	0.252724	0.235675	0.22458	0.270095	0.289996	0.25774	0.346635	0.305161	0.238885	0.204641	0.266979	0.307509	0.187211	0.152671	0.283557	0.222273	0.202714	0.243104	0.175416	0.132917	0.376146	0.200063	0.216131	0.157206	0.303985	0.333479	0.23223	0.198663	0.239892	0.077078	0.241112
H33K27ac	0.0001	0.000358	9.2e-05	9.4e-05	0.000138	0.000202	0.001389	0.004954	0.0001085	0.000252	0	8.2e-05	6e-05	0.001116	0.0004415	0.003352	0.000135	0.001264	0.001063	0.009436	4.25e-05	0.001568	0.004837	7.5e-06	0.060295	0.001047	0.003125	1e-06	0.000169	4.4e-05	0.000155	0.000907	0.000638	3e-06	0.00038	0.0005205	7.8e-05	6e-06	0.005049	0.000152	4e-06	0.000175	0.000214	0.000195	0.004796	3e-05	0	0.0002495	9.1e-05
H33K36me1	0.058918	0.054584	0.0702785	0.060219	0.070192	0.0734955	0.099496	0.082171	0.127419	0.101328	0.166924	0.112326	0.151742	0.187487	0.241063	0.122282	0.199443	0.159673	0.206152	0.150362	0.158849	0.265464	0.151792	0.211759	0.157846	0.176439	0.161521	0.213798	0.269055	0.175562	0.224323	0.256809	0.190769	0.254683	0.205508	0.192019	0.089936	0.252352	0.150903	0.295416	0.109818	0.174775	0.122118	0.145009	0.285859	0.131183	0.177289	0.076449	0.204051
H33K36me2	0.776051	0.77009	0.747275	0.843495	0.745151	0.69172	0.495287	0.591055	0.617426	0.58323	0.704965	0.538143	0.22665	0.336504	0.346005	0.397621	0.286878	0.257619	0.329191	0.27748	0.329248	0.232827	0.26702	0.322852	0.264676	0.304661	0.331218	0.289028	0.230696	0.421233	0.250835	0.225642	0.353461	0.342871	0.201164	0.29597	0.364989	0.165892	0.486774	0.194632	0.290821	0.383277	0.325664	0.343769	0.298692	0.659391	0.430972	0.723689	0.305825
H33K36me3	0.023909	0.040917	0.0417305	0.039531	0.038301	0.0567915	0.097763	0.099207	0.047835	0.045397	0.040538	0.076595	0.137242	0.168693	0.106099	0.196272	0.155259	0.100686	0.078668	0.211334	0.133005	0.081371	0.180399	0.124124	0.07335	0.099229	0.15819	0.178532	0.120403	0.0923905	0.15853	0.066128	0.1529	0.102036	0.171878	0.128788	0.235228	0.33933	0.066276	0.230555	0.24521	0.136171	0.130327	0.089395	0.041984	0.060114	0.075435	0.0574335	0.113227
H3K56me1	0.000213	0.000436	0.000568	0	0.001317	6.55e-05	0.000198	0.001028	0.0004505	0	2e-06	0.000244	0.000227	2.8e-05	0.0110955	1.1e-05	3.3e-05	4.8e-05	8e-06	4e-06	0.0001495	0.000412	2.2e-05	0.014985	1e-06	0.000107	3.15e-05	7e-06	7e-06	0.003092	2.7e-05	2.3e-05	0.0004945	0.001834	1.3e-05	0.0001635	0.001096	0	0.002829	0.000179	0	3.2e-05	0.000419	0.000266	0.000281	0	0	7.05e-05	1.9e-05
H3K56me2	0.003453	0.000701	0.002753	0.00272	0.000352	0.0010725	0.005028	0.050811	0.009228	0.005217	0.005868	0.0007045	0.00628	0.019146	0.0072135	0.005874	0.002709	0.001831	0.000949	0.007247	0.01362	0.015631	0.007493	0.002542	4e-06	0.008024	0.010757	0.006058	0.003977	0.0094305	0.004889	0.004551	0.0028435	0.019828	0.003171	0.01502	0.012312	0.002036	0.000756	0.004168	0.00182	0.010378	0.001329	0.005752	0.015884	0.000975	0.000266	0.0135835	0.001014
H3K56me3	4.4e-05	0	3.4e-05	4.4e-05	2.4e-05	0.0001335	0	3.8e-05	0.001171	0	0	9.5e-06	0	3e-06	0.0013445	2e-06	1e-06	0.000101	0	2.2e-05	6.65e-05	-1e-06	0.000165	0.000521	8e-06	0	0.0007095	0	0	0	0	2e-06	3.5e-05	1e-06	0.001459	0.0005705	1.6e-05	4e-05	0.000224	1e-05	8e-06	0.001371	3.1e-05	1.9e-05	1.3e-05	2e-06	1.8e-05	1e-06	1e-06
H3K56ac	0.000411	0.000499	0.0002605	0.000213	0.000466	0.000315	0.001576	0	0.001987	3.9e-05	0.000549	0.0001625	0.000124	0	0.0037575	0.000212	0.000465	8.65e-05	0	9e-05	0.000234	0.000864	0.000138	0.000658	0	0.005638	5e-06	0.000199	0.001408	0.0001635	3e-06	0.000462	0.0001055	0.015217	2.3e-05	0.001833	0.00034	1e-05	0.000668	0.000393	5.4e-05	0.005901	8.2e-05	0.000122	0.000931	2.9e-05	1e-06	6.85e-05	4.4e-05
H3K79me1	0.008441	0.036042	0.011598	0.008505	0.009124	0.0145025	0.003855	0.003842	0.0594205	0.005246	0.070685	0.0030185	0.010407	0.002858	0.023108	0.009066	0.009988	0.0071225	0.002273	0.005685	0.023526	0.027517	0.006033	0.08481	0.004448	0.025418	0.028503	0.001989	0.006052	0.0120075	0.010204	0.002835	0.0417635	0.020087	0.015404	0.0053835	0.011908	0.10324	0.002222	0.019562	0.03038	0.011333	0.006555	0.007736	0.0191005	0.009118	0.017578	0.0117145	0.013516
H3K79me2	0.0435	0.034088	0.059973	0.037744	0.061063	0.0508925	0.021816	0.081384	0.043955	0.041888	0.046256	0.031331	0.040285	0.036813	0.053788	0.037439	0.076214	0.0593335	0.027842	0.040175	0.062471	0.051546	0.099747	0.0720495	0.03157	0.035273	0.073537	0.029339	0.046033	0.0307415	0.051776	0.046027	0.0291935	0.068537	0.098044	0.0305475	0.036566	0.01828	0.057109	0.049225	0.041649	0.046018	0.047408	0.05538	0.0481935	0.034996	0.04957	0.0440045	0.031149
H3K79me3	8e-06	1e-05	3.25e-05	0.000264	1.1e-05	2.35e-05	0	8.8e-05	0.000419	0	0	1.45e-05	0	3e-06	5e-05	0.000208	2e-06	0.00017	5e-06	3e-06	0.0016705	1e-06	1.6e-05	2.6e-05	0.000989	5.4e-05	4.5e-05	0	0	0	0	1.6e-05	0.0002765	9e-06	0.000614	1.15e-05	1e-06	0	0.000107	6.5e-05	8e-06	5e-06	0.000183	4.2e-05	2.9e-05	8.4e-05	0	8e-06	2e-06
H3K79ac	0.002648	0.002995	0.0062295	0.001469	0.002333	0.0049965	0.012352	0.013391	0.010548	0.000258	0.000593	0.001104	0.001568	0.010446	0.0015665	0.010479	0.014758	0.0112465	0.010899	0.011128	0.006748	0.015134	0.013428	0.0002715	1e-06	0.010356	0.011699	0.00229	0.010651	0.008252	0.006484	0.009882	0.0055315	0.001139	0.020294	0.0023145	0.000759	0.003837	0.00815	0.003953	0.000838	0.006956	0.004116	0.005789	0.0094555	0.00275	0.000407	0.0021535	0.002622
H3K122ac	0.000412	0.002297	0.0094175	0.000809	0.000234	0.0026695	0.00065	0.001091	0.071711	0.000281	0.001566	0.0004695	3e-06	3.4e-05	0.0048335	0.000309	0.000964	0.0023095	0.001573	0.000355	0.0037845	0.000201	5.5e-05	0.085068	1e-06	0.000108	0.0207155	0.000169	0.000545	0.005094	5e-06	0.003309	0.0025785	0.01177	0.000122	0.0020655	0.001751	0.00033	0.021936	0.003196	0.001771	0.000318	0.00395	0.000847	0.006069	0.000404	2.2e-05	0.0004965	0.000202
H4K5ac	0.03027	0.021189	0.012486	0.027965	0.003486	0.027472	0.022095	0.03739	0.033388	0.049548	0.038164	0.0224735	0.008166	0.045326	0.0246365	0.107023	0.024821	0.016708	0.015726	0.036372	0.024181	0.045245	0.027465	0.023926	0.023049	0.041722	0.033429	0.026643	0.01209	0.0168915	0.018476	0.023231	0.0175895	0.016896	0.044385	0.027249	0.084339	0.027224	0.013001	0.009459	0.059471	0.048725	0.006421	0.055377	0.0161035	0.026528	0.031432	0.073255	0.023652
H4K8ac	0.210988	0.174612	0.162713	0.189805	0.10609	0.149605	0.071992	0.076192	0.0917865	0.100646	0.060865	0.066312	0.088792	0.196828	0.0715465	0.171309	0.129848	0.0815325	0.035946	0.123151	0.063652	0.125095	0.091541	0.07531	0.108882	0.125177	0.0935385	0.083966	0.06611	0.0625505	0.092369	0.113557	0.118945	0.048354	0.103407	0.073664	0.123669	0.135911	0.193489	0.09801	0.092964	0.193077	0.096217	0.184018	0.12237	0.049455	0.066105	0.114356	0.077122
H4K12ac	0.129995	0.18551	0.178775	0.172806	0.108765	0.155368	0.140903	0.035736	0.10747	0.170229	0.039174	0.0386345	0.144785	0.129899	0.098171	0.063612	0.121503	0.0816175	0.579233	0.117904	0.0732165	0.044479	0.062558	0.111933	0.08274	0.126239	0.122216	0.058704	0.049931	0.0801205	0.045242	0.095659	0.117175	0.139176	0.061065	0.105106	0.088851	0.13317	0.14769	0.104548	0.096553	0.206244	0.11584	0.140765	0.187315	0.066787	0.046072	0.100271	0.026873
H4K16ac	0.236996	0.159667	0.235692	0.139527	0.29305	0.264755	0.196159	0.144858	0.256987	0.148232	0.314489	0.430446	0.352605	0.241411	0.357025	0.181215	0.233786	0.180839	0.644616	0.223651	0.373193	0.245205	0.156423	0.269398	0.250144	0.233102	0.352285	0.218847	0.315022	0.272705	0.268735	0.176714	0.321073	0.162781	0.217338	0.347691	0.210932	0.188356	0.237295	0.273039	0.169517	0.297299	0.301581	0.17948	0.281317	0.278045	0.35124	0.258343	0.267171
H4K20me1	0.200703	0.115589	0.106515	0.113958	0.091338	0.119326	0.079279	0.097996	0.0750565	0.078168	0.080031	0.153468	0.071357	0.085179	0.094908	0.06846	0.143586	0.1014	0.091146	0.152993	0.110687	0.126908	0.075106	0.096542	0.049687	0.054951	0.118777	0.06526	0.055118	0.498501	0.1102	0.10936	0.075335	0.104777	0.078799	0.094862	0.132667	0.128746	0.082305	0.082286	0.140908	0.126002	0.076559	0.090942	0.134369	0.13636	0.334772	0.15897	0.129578
H4K20me2	0.674488	0.806274	0.819461	0.802455	0.826879	0.822464	0.852399	0.768126	0.865004	0.84446	0.794898	0.745486	0.830175	0.755869	0.807916	0.860595	0.709659	0.814351	0.776174	0.744398	0.813275	0.822289	0.768264	0.82823	0.769908	0.849655	0.800455	0.816294	0.852243	0.413863	0.736884	0.731934	0.832391	0.751107	0.781415	0.852707	0.737027	0.780202	0.810423	0.816917	0.76344	0.78923	0.82707	0.819642	0.780423	0.74525	0.576531	0.775409	0.778935
H4K20me3	0.100177	0.061858	0.054797	0.067367	0.055503	0.031663	0.052588	0.12618	0.044052	0.058714	0.114062	0.046127	0.091939	0.14602	0.0408415	0.061406	0.129721	0.0713355	0.123331	0.088071	0.070858	0.034891	0.119467	0.067224	0.171103	0.085681	0.036261	0.112038	0.085942	0.046995	0.134052	0.148906	0.045519	0.132012	0.135705	0.030749	0.114896	0.074763	0.096524	0.090471	0.09037	0.020397	0.091595	0.07874	0.028239	0.098437	0.063567	0.0267025	0.076601
H4K20ac	0.003781	0.003912	0.0053825	0.00305	0.002822	0.0047595	0.007026	0.004612	0.007117	0.000643	0.000709	0.0019145	0.002146	0.006647	0.003986	0.006091	0.008938	0.0039255	0.007508	0.012606	0.0028615	0.011193	0.002789	0.002788	0.000784	0.003835	0.005078	0.001403	0.003635	0.019341	0.001881	0.004625	0.0051195	0.001532	0.003333	0.0035095	0.00232	0.005153	0.005776	0.002212	0.002403	0.006581	0.001809	0.004767	0.0094505	0.003005	0.00571	0.0054685	0.003897
H4K44ac	7.4e-05	0.00027	0.0002925	0.000265	0.000233	0.0001985	4e-06	0.000329	0.0004345	0.000125	8e-06	0.000238	7e-06	3.2e-05	0.001994	6.4e-05	0.000137	0.000295	0.000969	0.001409	2.4e-05	0.007016	0.000212	0.0012635	0.001466	0.000124	0.000574	7.9e-05	8e-06	3.5e-05	0.000419	0.000122	0.0005075	0.000182	0.000304	0.0002845	0.000496	6.9e-05	0.000488	0.000185	4.9e-05	0.001089	0.000187	0.000194	0.0001765	5.9e-05	1.2e-05	9.45e-05	3.4e-05
H12	0.081848	0.08039	0.0545635	0.011031	0.081292	0.007132	0.046952	0.080385	0.0407235	0.008424	0.011959	0.020068	0.010006	0.008477	0.0646175	0.047315	0.009573	0.0596485	0.001403	0.004173	0.304351	0.000245	0.00976	0.590526	0.001101	0.000107	0.014535	0.077096	0.065153	0.0555185	0.026444	0.070151	0.007666	0.011413	0.000723	0.030904	0.026395	0.041213	0.025446	0.067934	0.029733	0.020485	0.072654	0.047689	0.0217105	0.083973	0.018433	0.007307	0.051419
H13	0.045731	0.35844	0.277006	0.660108	0.029466	0.551015	0.127322	0.110237	0.122203	0.287956	0.137794	0.552029	0.306774	0.214927	0.632135	0.096835	0.162257	0.187089	0.040264	0.048823	0.658736	0.014014	0.069102	0.246027	0.014998	0.142696	0.792309	0.159054	0.148412	0.165631	0.110652	0.12958	0.360756	0.146206	0.144002	0.131393	0.072594	0.437196	0.285885	0.116267	0.16209	0.331456	0.142451	0.08716	0.728214	0.122461	0.135772	0.401745	0.296465
H14	0.774218	0.49161	0.513625	0.305986	0.76885	0.362762	0.457752	0.537993	0.607039	0.477223	0.827678	0.313686	0.661362	0.348653	0.176422	0.450552	0.65821	0.326908	0.776545	0.343326	0.032822	0.071098	0.523657	0.114988	0.962092	0.607187	0.192725	0.391911	0.573062	0.353973	0.71864	0.61324	0.369147	0.533923	0.16497	0.566366	0.698839	0.301052	0.483915	0.579968	0.614266	0.350462	0.589384	0.600156	0.170427	0.650424	0.817809	0.298033	0.474587
H15	0.098203	0.069559	0.154807	0.022875	0.120393	0.0790915	0.367974	0.271386	0.230035	0.226397	0.022569	0.114217	0.021857	0.427942	0.126826	0.405298	0.169959	0.426354	0.181788	0.603679	0.0040895	0.914643	0.39748	0.048459	0.021809	0.25001	0.000431	0.371938	0.213373	0.424878	0.144264	0.187029	0.262431	0.308457	0.690305	0.271336	0.202172	0.220539	0.204755	0.235831	0.193911	0.297597	0.19551	0.264995	0.0796485	0.143142	0.027987	0.292916	0.177528
H11	0.039143	0.017711	0.0176815	0.039219	0.018031	0.006845	0.006742	0.004977	0.131721	0.047819	0.02437	0.079296	9.9e-05	0.008088	0.0267225	0.013875	0.051943	0.0003715	0.001774	7.2e-05	0.0770995	0.054267	0.065765	0.075429	0.041989	0.078764	0.0831475	0.045255	0.000463	0.021391	0.021608	0.039262	0.095318	0.017685	0.013131	0.006765	0.012478	0.054884	0.020068	0.013412	0.002606	0.544678	0.001421	0.029554	0.01929	0.016589	0.011646	0.0015125	0.009531
H1v234	0.914084	0.135777	0.711333	0.629664	0.963807	0.934381	0.893251	0.992715	0.446276	0.516423	0.30112	0.689256	0.155036	0.964656	0.681839	0.478578	0.932725	0.670879	0.320131	0.985691	0.787531	0.881816	0.40593	0.471887	0.601057	0.662467	0.884413	0.526382	0.282896	0.880337	0.152144	0.060432	0.545569	0.708044	0.964696	0.901639	0.838072	0.907351	0.938789	0.435233	0.482188	0.201723	0.948798	0.947481	0.55028	0.679585	0.53615	0.883431	0.910877
H15_2	0.041708	0.846514	0.268609	0.321147	0.011266	0.058164	0.099658	0.002308	0.416864	0.42662	0.671222	0.226423	0.811948	0.026315	0.254391	0.507179	0.014831	0.328261	0.67739	0.011338	0.133109	0.061869	0.515614	0.451392	0.308899	0.258353	0.032334	0.426838	0.716472	0.0862005	0.825193	0.786256	0.358896	0.271526	0.021016	0.089665	0.139735	0.034266	0.031321	0.547298	0.511019	0.251226	0.047864	0.021463	0.430438	0.296879	0.452139	0.114368	0.078161
H1T	0.005066	-2e-06	0.0023765	0.00997	0.006897	0.0006095	0.000349	0	0.0051385	0.009138	0.003288	0.0050255	0.032917	0.000941	0.0370485	0.000368	0.000501	0.000489	0.000705	0.002899	0.0022605	0.002048	0.012691	0.0012925	0.048055	0.000416	0.0001055	0.001525	0.000169	0.0120715	0.001055	0.11405	0.000218	0.002746	0.001158	0.0019315	0.009716	0.003499	0.009822	0.004057	0.004187	0.002374	0.001917	0.001502	-7.5e-06	0.006947	6.5e-05	0.000689	0.00143
H2A1K36ac	1.5e-05	2.3e-05	1.85e-05	7e-06	1.7e-05	1.1e-05	0	1e-05	0.000503	3e-06	0	5e-07	0	4.5e-05	1.1e-05	1e-06	3e-06	5.05e-05	2e-06	0	0.000139	0	3e-06	0.000306	0.000555	0	6.25e-05	1e-06	1e-06	8e-06	0	0.00014	7.55e-05	4e-06	4.5e-05	2e-06	1e-06	5.1e-05	6.7e-05	4e-06	3e-06	1e-06	3.1e-05	1.3e-05	2.15e-05	3e-06	0	1.35e-05	1e-06
H2A3K36ac	0.000646	0.000263	0.0006815	9.8e-05	0.000579	0.000588	4.6e-05	0.000279	0.000536	7.3e-05	0.02822	0.0010015	0.030336	2.9e-05	0.008702	1.4e-05	0.002023	0.0003795	0.005684	0.001932	0.002112	0.000252	6.7e-05	0.0057635	0.00193	0.000166	0.0013735	9.8e-05	0.001426	0.00011	0.000395	3e-06	0.00184	0.006484	0.000263	0.0087975	0.0003	9e-05	0.000616	0.000311	0.000244	0.021036	0.000161	0.000263	0.001128	0.000128	0.0037	0.0002525	0.000173
H2AXK36ac	0.006395	0.000603	0.002577	0.000922	0.002028	0.0004	2e-05	0.005199	0.003328	0.000687	0.001648	0.003125	0.000119	0.000242	0.0099465	0.002542	0.000445	0.002458	2.9e-05	0.000407	0.004144	0.000359	5e-06	0.004526	0.00407	0.000183	0.01633	1.4e-05	3.8e-05	0.0008575	0.000803	0.001988	0.0187415	0.008328	1e-05	0.0195095	0.006145	0.002933	0.000975	0.000109	0.000503	0.004217	0.000541	0.005819	0.010485	0.000347	0.000165	0.000243	0.000125
H2A1K5ac	0.039486	0.023916	0.030467	0.032249	0.039641	0.048449	0.030537	0.08012	0.0477525	0.037817	0.047431	0.042453	0.057338	0.015478	0.0486025	0.090258	0.032404	0.0461225	0.056909	0.056643	0.0296505	0.083452	0.087143	0.0406175	0.050204	0.046256	0.0742635	0.032786	0.032046	0.039405	0.055571	0.045367	0.0438205	0.018817	0.035342	0.071883	0.04069	0.037715	0.013544	0.098981	0.021113	0.017883	0.054113	0.029159	0.0436805	0.034427	0.036997	0.0358795	0.024005
H2A1K9ac	0.013966	0.013472	0.0070895	0.010627	0.013586	0.009008	0.001191	0.001211	0.0192595	0.012753	0.009429	0.02485	0.036603	0.011954	0.0115265	0.059504	0.001298	0.0201185	0.047324	0.043127	0.012865	0.0427	0.011667	0.004186	0.024846	0.022822	0.0102335	0.009291	0.014183	0.0171965	0.020504	0.031081	0.002351	0.000942	0.003279	0.048939	0.020871	0.024779	0.005392	0.053319	0.002704	0.001939	0.034563	0.004911	0.0056435	0.007907	0.014939	0.009922	0.001168
H2A1K5me1	0.000409	0.000177	0.0003585	0.000165	0.000128	0.0004085	0.000331	0.001103	0.0003875	0.000136	9.7e-05	0.000236	0.008743	0.000729	0.0002025	6.2e-05	0.000205	0.000141	6e-06	0.000185	0.001125	2.9e-05	0.000116	0.007035	0.002962	2e-06	0.000782	0.001179	5e-06	0.000461	0.0003	0.000556	0.000815	0.000162	5.2e-05	0.0006485	0.000174	3.7e-05	0.000943	0.000356	0.00022	0.000312	0.0002	0.000303	0.001307	0.00013	1.7e-05	0.000383	5.6e-05
H2A1K9me1	0.001405	0.000803	0.0010915	0.001292	0.001461	0.000972	0.000906	0.00231	0.0010445	0.000658	0.000922	0.000511	0.001423	0.001423	0.002264	0.000781	0.000937	0.000861	0.001384	0.000912	0.002386	0.000729	0.001031	0.0039065	0.003502	0.000989	0.001261	0.000125	0.001587	0.001853	0.000964	0.001091	0.002106	0.001715	0.001717	0.0008135	0.001056	0.001561	0.002247	0.001938	0.001852	0.000631	0.002328	0.001354	0.001462	0.001207	0.002011	0.0005855	0.000633
H2AJK5ac	0.985803	0.98757	0.976101	0.983597	0.978139	0.987634	0.987398	0.938315	0.984649	0.970302	0.964789	0.984915	0.962897	0.944012	0.963095	0.978803	0.977896	0.973584	0.960098	0.979019	0.956313	0.987224	0.976721	0.964024	0.934739	0.944618	0.976205	0.969096	0.977522	0.972009	0.967511	0.966435	0.964931	0.965173	0.954597	0.980572	0.973937	0.985264	0.950599	0.93419	0.96698	0.98524	0.959541	0.954359	0.984015	0.947379	0.987951	0.957979	0.969605
H2AJK9ac	0.985214	0.987329	0.975652	0.982931	0.977377	0.987452	0.986883	0.936623	0.984106	0.969819	0.964157	0.984815	0.96087	0.942359	0.961059	0.977841	0.976853	0.972498	0.958592	0.97798	0.953728	0.98648	0.975533	0.960812	0.934701	0.943866	0.976086	0.968178	0.97665	0.97075	0.966578	0.964937	0.962706	0.963419	0.952545	0.979329	0.973462	0.984674	0.949608	0.932976	0.966393	0.985046	0.957617	0.953776	0.983712	0.947108	0.987591	0.957848	0.969273
H2AJK5me1	0.00101	0.001164	0.0022225	0.002341	0.001148	0.000976	0.000553	6.2e-05	0.0029325	0.002691	0.002363	0.003148	0.000199	0.007779	0.003624	0.00018	0.000131	0.0009835	0.000674	0.001507	0.006142	0.000694	2e-05	0.0083255	0.03599	0.000276	0.0115515	0.002042	9e-06	0.003345	0.001417	0.003767	0.0026945	0.003351	0.001484	0.001286	0.002304	1.7e-05	0.005136	0.00433	0.005265	0.003206	0.005611	0.004619	0.002902	0.0004	2e-05	0.0009295	0.000115
H2AJK9me1	0	0	8.4e-05	7e-06	0	0.000178	0	0.00064	0.0001555	0	0	4.6e-05	0.001286	0.000618	0.004486	0.000633	0.000251	0.0006865	0	0	5.65e-05	3e-06	0.000461	0.0001785	0	0.00038	0.0020605	0.000521	0.000768	0.0007035	0	0	0	0	0	0	0	0.005628	0	0	0	0.000448	0	0	0.000118	0.031059	0	0.03726	0.012196
H2AXK5ac	0.004854	0.004364	0.00681	0.005876	0.006378	0.0065775	0.001784	0.001326	0.0077205	0.032698	0.0022	0.0142975	0.005534	0.009398	0.0058555	0.009453	0.008406	0.0054695	0.017014	0.012345	0.0053505	0.005963	0.004043	0.0326225	0.004368	0.005312	0.020967	0.001331	0.010086	0.00788	0.008915	0.003316	0.0126485	0.00612	0.007501	0.0037565	0.005629	0.005968	0.010282	0.008328	0.006321	0.006593	0.007496	0.0123	0.0118865	0.005796	0.004653	0.006922	0.006805
H2AXK9ac	0.003351	0.001624	0.0079425	0.007963	0.006763	0.0086855	0.000904	0.001591	0.0067705	0.045792	0.001098	0.007861	0.007489	0.010869	0.005356	0.009042	0.008001	0.013503	0.019022	0.016436	0.003871	0.005815	0.012738	0.0273455	0.018795	0.010547	0.004982	0.000954	0.009063	0.0059925	0.034759	0.001866	0.0099885	0.005465	0.004379	0.0016925	0.006512	0.003834	0.0145	0.00648	0.005759	0.008688	0.0048	0.007568	0.011737	0.004168	0.004201	0.00566	0.005215
H2AXK5me1	0.267871	0.21215	0.232461	0.175697	0.239718	0.210683	0.216107	0.304171	0.295034	0.236865	0.247262	0.242359	0.239955	0.293143	0.294308	0.215995	0.263379	0.224917	0.268626	0.261166	0.257198	0.203765	0.174247	0.261411	0.244329	0.213241	0.249517	0.165862	0.23148	0.21223	0.266472	0.232555	0.23382	0.308438	0.20419	0.245612	0.304681	0.3293	0.225846	0.239154	0.216742	0.305063	0.255494	0.257589	0.236707	0.272428	0.288925	0.241401	0.267667
H2AXK9me1	0.644706	0.710893	0.66169	0.710491	0.664842	0.676394	0.72717	0.6319	0.60501	0.556118	0.685766	0.607478	0.645063	0.631706	0.61275	0.692845	0.62722	0.665867	0.647761	0.630005	0.623406	0.735614	0.724248	0.54257	0.637282	0.714549	0.596735	0.717108	0.660918	0.728613	0.590789	0.723694	0.64329	0.618948	0.667204	0.680012	0.611409	0.598941	0.697758	0.664806	0.663313	0.593537	0.637514	0.641802	0.611637	0.603993	0.587977	0.677465	0.642632
H2AVK4ac	0.065382	0.095392	0.032771	0.017502	0.057596	0.0360545	0.023151	0.185267	0.018737	0.015345	0.010059	0.116821	0.016746	0.142044	0.106987	0.09031	0.092084	0.0490845	0.166555	0.134053	0.035869	0.359021	0.195965	0.14891	0.030725	0.06444	0.041484	0.062702	0.037602	0.065839	0.015543	0.091035	0.033679	0.012712	0.146801	0.0580775	0.025718	0.007988	0.081003	0.045146	0.030836	0.039284	0.044894	0.047847	0.227259	0.017935	0.024802	0.050636	0.020913
H2AVK7ac	0.160762	0.210293	0.102529	0.140268	0.109846	0.154082	0.029379	0.15335	0.0174625	0.020893	0.01257	0.091351	0.014457	0.112787	0.0290745	0.08988	0.092365	0.0500555	0.099615	0.129969	0.035683	0.339919	0.021827	0.1276	0.026038	0.021637	0.0246085	0.009538	0.006619	0.0332245	0.01314	0.065139	0.0233605	0.012398	0.121063	0.030363	0.021282	0.148869	0.047568	0.079565	0.049555	0.038403	0.032481	0.037174	0.0311445	0.019832	0.01369	0.062975	0.010495
H2AVK11ac	0.011104	0.001969	0.113717	0.161147	0.001109	0.135214	0.019105	0.012307	0.014245	0.003436	0.020463	0.001555	0.012424	0.010506	0.0153645	0.015537	0.000448	0.060407	0.016339	0.034108	0.0101545	0.133889	0.053593	0.0662265	0.040925	0.057409	0.0216815	0.003747	0.028321	0.0197705	0.012854	0.001032	0.100791	0.010603	0.000467	0.0062025	0.008856	0.265384	0.000257	0.017399	0.010186	0.002582	0.010172	0.016754	0.0658475	0.002502	0.00317	0.0548645	0.001242
H2AVK15ac	0.003514	0.001925	0.000427	0.000341	0.001099	0.135691	0.000662	0.001451	0.013434	0.003434	0.001399	0.0006605	0.012023	0.002009	0.01399	0.014552	0.000366	0.0144845	0.007113	0.033406	0.009275	0.132798	0.004361	0.062198	0.024976	0.007783	0.021656	0.00373	0.002803	0.0195035	0.002878	0.000905	0.012423	0.010403	0.000402	0.00176	0.001103	0.27259	0.00014	0.001202	0.003044	0.001951	0.000202	0.000131	0.249931	0.000113	0.014285	0.05058	0.002778
H2AZK4ac	0.124975	0.114934	0.089656	0.076462	0.079871	0.146657	0.045862	0.046916	0.0140335	0.025631	0.016762	0.024136	0.033679	0.050914	0.057029	0.150104	0.070838	0.053757	0.048185	0.055486	0.0127245	0.081352	0.079634	0.0081655	0.107401	0.020296	0.0318405	0.017764	0.053017	0.0441015	0.016927	0.03011	0.0626105	0.054989	0.038158	0.047909	0.076076	0.124857	0.134059	0.098791	0.014392	0.150669	0.124032	0.131051	0.20881	0.057237	0.014978	0.0756355	0.134782
H2AZK7ac	0.112155	0.090833	0.100655	0.101592	0.086931	0.163394	0.024653	0.04967	0.0085645	0.006466	0.035023	0.054031	0.023183	0.097904	0.04046	0.130001	0.082994	0.06713	0.046617	0.050838	0.008012	0.221321	0.0862	0.002427	0.081433	0.017298	0.023107	0.18793	0.039474	0.0370195	0.051435	0.047409	0.123108	0.045185	0.016189	0.049256	0.099157	0.155919	0.106943	0.113959	0.097877	0.168572	0.134578	0.13779	0.197696	0.066924	0.013551	0.065368	0.136173
H2AZK11ac	0.028949	0.036498	0.015085	0.003689	0.019299	0.005328	0.025676	0.016494	0.0080365	0.015639	0.022221	0.0246075	0.023553	0.026148	0.00879	0.036937	0.032111	0.0212685	0.018118	0.013451	0.0074385	0.105908	0.050808	0.0020805	0.065442	0.017197	0.0176895	0.139115	0.026801	0.021639	0.03111	0.007112	0.0403955	0.034498	0.036833	0.022041	0.007752	0.023252	0.028559	0.008483	0.067425	0.004055	0.012875	0.013733	0.036546	0.003039	0.008358	0.0122415	0.012046
H2AZK15ac	6.4e-05	0.005226	0.003794	0.026796	0.000446	0.006914	0.00486	0.001053	0.0158825	6.3e-05	0.007528	0.004763	0.037319	0.004026	0.0103015	0.026612	0.005666	0.0018075	0.005153	0.005558	0.0030295	0.006336	0.013547	0.0004545	0.039948	0.01707	0.004535	0.004943	0.013671	0.0080135	0.006138	0.002942	0.0156765	0.03077	0.002747	0.005825	0.00556	0.01436	0.007327	0.002175	0.008299	0.002319	0.001991	0.00285	0.017369	0.000803	0.012737	0.000154	0.000421
H2A1K13ac	0.011533	0.014704	0.020686	0.013643	0.019016	0.0093585	0.017232	0.016014	0.0173015	0.005332	0.005132	0.0114045	0.013505	0.021652	0.0126225	0.025016	0.015967	0.0161255	0.014861	0.020755	0.0110425	0.012099	0.023909	0.0115525	0.014141	0.018109	0.020361	0.00616	0.00998	0.0141415	0.005594	0.011184	0.0217885	0.003474	0.010147	0.0171245	0.006121	0.011978	0.012623	0.007495	0.007361	0.022436	0.00866	0.012563	0.0242365	0.012331	0.024582	0.014576	0.022814
H2A1K15ac	0.421246	0.469998	0.419336	0.422937	0.437075	0.438296	0.377218	0.415127	0.422615	0.416573	0.516607	0.408498	0.520098	0.42773	0.438072	0.407511	0.415121	0.425571	0.564902	0.417654	0.454201	0.412681	0.427566	0.439607	0.443854	0.4638	0.400016	0.416978	0.455625	0.42583	0.535456	0.535743	0.419103	0.452815	0.524188	0.37282	0.476356	0.421521	0.531693	0.46928	0.516166	0.368967	0.47094	0.424601	0.389109	0.405904	0.474403	0.408206	0.452725
H2A1K13me1	0	7.3e-05	9.2e-05	2.8e-05	2.4e-05	8.5e-06	0	1e-05	0.000502	6e-06	1.1e-05	0.0013095	0.000555	7.9e-05	0.001396	5.9e-05	4.7e-05	5e-07	1.6e-05	0.000155	0.0002345	6.2e-05	2.9e-05	0.0001615	0.011095	0	0.0015635	1e-06	1e-06	5e-07	0.000252	2e-06	0.000107	1e-06	0.000216	5.4e-05	0.001659	0.000139	3e-06	2e-06	0.001933	0.000107	2e-06	1e-06	0.0003375	3e-06	7.2e-05	9.5e-06	4.5e-05
H2A1K15me1	8.4e-05	8.1e-05	5.15e-05	3.7e-05	8.1e-05	1.05e-05	0	7e-06	0.000536	5e-06	2e-06	0.0018345	0.000593	5.4e-05	0.001927	4.6e-05	3.2e-05	4.5e-06	7e-06	0.000205	0.000324	1e-06	1.6e-05	0.0001945	0	0.000455	0.00018	0.000292	0.000247	0.0004135	0	0.002129	5e-07	0.001312	0.000201	5.35e-05	0	2.8e-05	0.000475	0.000208	0	9e-06	0.000196	0.00025	0.0001465	8e-06	0.000179	6.5e-06	5.8e-05
H2A3K13ac	0.006032	0.00506	0.0082005	0.006269	0.008029	0.006694	0.008727	0.008317	0.012574	0.000748	0.002331	0.003945	0.010902	0.011952	0.0040905	0.012664	0.009525	0.012539	0.014211	0.011061	0.004724	0.007798	0.009836	0.0055255	0.006452	0.014476	0.008955	0.00398	0.008137	0.00827	0.004422	0.011115	0.009292	0.002106	0.013654	0.006778	0.003398	0.003612	0.013592	0.005517	0.002408	0.007337	0.005035	0.0078	0.0114505	0.006022	0.016428	0.003454	0.008717
H2A3K15ac	0.016283	0.017591	0.0264635	0.021313	0.024727	0.0149545	0.027054	0.020412	0.030007	0.004797	0.006834	0.0114505	0.022585	0.031802	0.014986	0.03505	0.02294	0.0261805	0.02558	0.030048	0.0136215	0.01899	0.031266	0.014381	0.018608	0.029473	0.0264695	0.009406	0.018222	0.021723	0.009024	0.020827	0.028027	0.004218	0.022771	0.0187955	0.009296	0.014069	0.024004	0.011325	0.009724	0.02531	0.012648	0.018164	0.0327205	0.017051	0.038194	0.018035	0.025361
H2A3K13me1	0.000187	0	7.65e-05	0	0	0.000159	0.000149	1.6e-05	0	0.000125	2.8e-05	0.000242	0.000645	0.000643	0.0003445	0	0	0.0001185	0.000212	0.00054	0.0006585	0.000221	1e-06	0	0.000267	3.9e-05	1.85e-05	0.00027	0.000396	1e-06	0	1e-06	0.0012825	1e-06	1e-06	0.00123	4.1e-05	0	0	3.5e-05	3.3e-05	1.1e-05	0.000112	2.5e-05	0.000501	5e-06	0	3e-06	7e-06
H2A3K15me1	0.504423	0.504567	0.547728	0.50851	0.532055	0.544098	0.582947	0.577838	0.521196	0.546915	0.445355	0.589884	0.420805	0.540992	0.544439	0.556384	0.538793	0.520277	0.347966	0.534256	0.511413	0.553957	0.518078	0.521918	0.515829	0.530605	0.575033	0.544161	0.456139	0.512636	0.43592	0.408937	0.562307	0.465853	0.441895	0.607009	0.448082	0.551357	0.428528	0.527023	0.411268	0.600127	0.527312	0.574719	0.584414	0.550263	0.494189	0.546701	0.519275
H2A14s.HLQLAIR	0.916537	0.906568	0.91712	0.924579	0.911021	0.902274	0.934473	0.952077	0.911187	0.940593	0.932427	0.949067	0.931955	0.947807	0.957329	0.966807	0.947907	0.936902	0.93826	0.957835	0.924437	0.957661	0.956069	0.90752	0.930596	0.939943	0.936937	0.932152	0.948608	0.513992	0.952764	0.948031	0.942653	0.943528	0.934914	0.948106	0.933329	0.922405	0.895445	0.944452	0.908378	0.944493	0.944139	0.954186	0.928503	0.913963	0.823689	0.918505	0.919311
H2AZ.AGGKAGKDSGKAKTKAVSR	0.044619	0.036757	0.0368025	0.028514	0.03868	0.04376	0.034006	0.02356	0.031228	0.0242	0.030262	0.0199045	0.021837	0.020662	0.0129285	0.011226	0.022279	0.027951	0.040323	0.016208	0.02371	0.026232	0.015028	0.021441	0.018651	0.022015	0.02008	0.039994	0.026283	0.287811	0.017776	0.032703	0.0200135	0.016855	0.036609	0.011977	0.024626	0.031542	0.042808	0.018929	0.033212	0.028909	0.022183	0.018758	0.0206715	0.032914	0.056311	0.0312285	0.042314
H2AY.SAKAGVIFPVGR	0.002543	0.003324	0.003882	0.006332	0.003124	0.006415	0.004881	0.002558	0.0024855	0.002307	0.004516	0.002145	0.004836	0.001542	0.001831	0.002043	0.002843	0.005497	0.006785	0.00722	0.004381	0.002957	0.002004	0.0028795	0.000363	0.002936	0.002732	0.003243	0.005557	0.0326455	0.002665	0.002929	0.005096	0.004347	0.003279	0.002841	0.002768	0.003193	0.010029	0.004698	0.004953	0.004109	0.00352	0.004401	0.003407	0.002788	0.002942	0.0040765	0.001874
H2AX.GKTGGKAR	0.036301	0.05335	0.0421955	0.040575	0.047174	0.0475505	0.02664	0.021804	0.0551	0.032899	0.032795	0.0288845	0.041372	0.029989	0.0279125	0.019925	0.02697	0.02965	0.014632	0.018737	0.047472	0.01315	0.0269	0.06816	0.05039	0.035106	0.0402505	0.024611	0.019552	0.165552	0.026795	0.016337	0.032238	0.035271	0.025198	0.0370755	0.039277	0.04286	0.051718	0.031922	0.053456	0.022489	0.030158	0.022655	0.0474185	0.050335	0.117058	0.04619	0.036501
H2B1C	0.714896	0.737651	0.722857	0.393206	0.710204	0.664269	0.603948	0.655781	0.759726	0.649551	0.656266	0.554132	0.566465	0.619159	0.741699	0.626148	0.647856	0.683069	0.576315	0.536216	0.66213	0.492744	0.637803	0.767811	0.627471	0.615441	0.719228	0.540436	0.54053	0.549906	0.719601	0.689843	0.722199	0.676465	0.480166	0.628464	0.721682	0.647759	0.629212	0.639504	0.761589	0.689784	0.671318	0.584595	0.700438	0.680638	0.702027	0.709703	0.636929
H2B1H	0.068622	0.07485	0.092097	0.127519	0.098426	0.107149	0.092773	0.078664	0.0721645	0.093171	0.090951	0.142251	0.055468	0.136028	0.099043	0.161324	0.108064	0.0838585	0.08917	0.11236	0.136354	0.125493	0.114605	0.0566795	0.031092	0.113354	0.123552	0.131418	0.145059	0.150822	0.081394	0.062576	0.108686	0.069637	0.123555	0.114352	0.093311	0.107348	0.076814	0.105948	0.073201	0.088469	0.113372	0.149537	0.092237	0.114946	0.110635	0.143147	0.142892
H2B1F	0.058393	0.004444	0.032858	0.102659	0.044225	0.030606	0.081437	0.072505	0.025907	0.030645	0.045371	0.036807	0.079786	0.067901	0.055398	0.075381	0.077714	0.04538	0.123524	0.13855	0.027739	0.099751	0.054077	0.02484	0.020832	0.041958	0.020897	0.063463	0.045328	0.0620685	0.048901	0.038911	0.0533725	0.064158	0.089472	0.069587	0.051718	0.043689	0.052663	0.04096	0.039618	0.051195	0.054834	0.062725	0.033838	0.052803	0.039823	0.026406	0.03864
H2B1B	0.015329	0.066671	0.00586	0.150891	0.015909	0.085647	0.018779	0.022608	0.032923	0.0695	0.01254	0.081451	0.03241	0.0258	0.011762	0.017272	0.036669	0.041065	0.050456	0.024313	0.026931	0.065084	0.038554	0.012892	0.006034	0.033935	0.0211545	0.094415	0.087325	0.04796	0.01093	0.083312	0.017881	0.01207	0.051413	0.0514915	0.012705	0.007773	0.097622	0.07903	0.010356	0.022886	0.015224	0.032523	0.056306	0.02735	0.050132	0.0173885	0.018133
H2B1N	0.025948	0.023858	0.0358305	0.059296	0.035098	0.0268265	0.030666	0.026463	0.0174175	0.033983	0.038198	0.0365215	0.049501	0.02872	0.0133095	0.018221	0.026144	0.035715	0.044779	0.041949	0.014192	0.060602	0.040868	0.0110465	0.003814	0.030526	0.0196025	0.055019	0.047913	0.055895	0.035362	0.043833	0.02406	0.030254	0.080776	0.0239885	0.033763	0.032896	0.027354	0.036776	0.028321	0.034989	0.013614	0.053126	0.021916	0.030422	0.008358	0.0335585	0.0313
H2B1D	0.061492	0.048237	0.083415	0.113841	0.072065	0.0586965	0.123563	0.121308	0.0508955	0.082833	0.112946	0.119946	0.180946	0.095513	0.0371575	0.070844	0.071629	0.0821575	0.095871	0.10546	0.0929375	0.111736	0.093932	0.0367585	0.293073	0.127473	0.040677	0.085873	0.10442	0.106079	0.087066	0.06744	0.0537565	0.09428	0.110265	0.0732425	0.065587	0.132613	0.091745	0.0709	0.058149	0.060901	0.104452	0.084064	0.0504675	0.072826	0.059037	0.052062	0.102316
H2B1M	0.019726	0.014907	0.0090005	0.028502	0.014352	0.0111935	0.010479	0.008714	0.0093755	0.019013	0.016136	0.020423	0.006289	0.010291	0.0080255	0.010647	0.013788	0.0194005	0.01457	0.019514	0.017301	0.014036	0.014123	0.0055215	0.013305	0.016193	0.021282	0.015476	0.018988	0.0183085	0.006971	0.006694	0.006048	0.019454	0.045893	0.012038	0.006207	0.005534	0.008335	0.012725	0.008245	0.029889	0.01031	0.013299	0.024439	0.00929	0.007431	0.009424	0.010723
H2B1L	0.035594	0.029381	0.018083	0.024087	0.00972	0.015612	0.038355	0.013956	0.0315905	0.021305	0.027592	0.008469	0.029134	0.016588	0.033606	0.020164	0.018137	0.0093545	0.005315	0.021638	0.022415	0.030554	0.006038	0.0844525	0.004379	0.021122	0.033607	0.013901	0.010437	0.008961	0.009774	0.007391	0.013998	0.033681	0.018461	0.0268365	0.015028	0.022387	0.016256	0.014156	0.020521	0.021887	0.016875	0.020131	0.020359	0.011726	0.022557	0.0083115	0.019067
[truncated: 33 more columns]
