# Supplementary material
Source: Research Square preprint supplement (doi:10.21203/rs.3.rs-9763213/v1)
Supplement: Supplementary file 10 [file 8fd4d5d449d58f6eaf7ad223.xlsx]

## Sheet: Stats_Peptides_Tumor_vs_Control
Peptide	logFC	AveExpr	t	P.Value	adj.P.Val	B
H3_9_17 K14ac	-0.538762	-3.41859	-5.03728	3.47326e-05	0.0031954	2.25806
H1_1_35 H13.SETAPLAPTIPAPAEKTPVKKKAKKAGATAGKR	1.9709	-1.74128	4.51924	0.000132147	0.00607877	0.966315
H1_1_35 H14.SETAPAAPAAPAPAEKTPVKKKAR	-1.61218	-0.377083	-4.21638	0.000288461	0.00884613	0.214553
H2B_1_29 2F.PDPAKSAPAPKKGSKKAVTKVQKKDGKKR	-0.656488	-4.31473	-3.88877	0.0006677	0.0138936	-0.590094
H4_20_23 K20me3	-0.812524	-3.88587	-3.84047	0.000755088	0.0138936	-0.707624
H3_9_17 K9me2	0.394603	-2.03423	3.69239	0.00109924	0.016855	-1.06575
H3_9_17 K9me3	0.629853	-3.21032	3.61611	0.00133245	0.0175122	-1.24876
H3_9_17 K9me1K14ac	-0.304112	-3.75988	-3.43732	0.00208484	0.0239757	-1.6732
H2B_1_29 1D.PEPTKSAPAPKKGSKKAVTKAQKKDGKKR	-0.600022	-3.5975	-3.12438	0.00450171	0.0460175	-2.39757
H2AV_1_19 unmod	-0.946971	3.65061	-2.91531	0.00743692	0.0684196	-2.86531
H4_4_17 K8acK12ac	2.47254	-10.5495	2.87241	0.00823201	0.0688495	-2.95941
H33_27_40 K36me2	0.913369	-4.94474	2.80914	0.00955346	0.0732432	-3.09697
H3_73_83 unmod	-0.373337	3.92518	-2.43083	0.0226493	0.160287	-3.88447
H2B_1_29 1C.PEPAKSAPAPKKGSKKAVTKAQKKDGKKR	0.31644	0.990097	2.37166	0.0258032	0.169564	-4.00161
H4_20_23 unmod	0.846152	-6.15244	2.18804	0.0383215	0.235038	-4.35337
H4_4_17 K16ac	0.358923	-1.73798	2.09232	0.0468249	0.269243	-4.52924
H2A3_12_17 unmod	-0.191847	-0.259038	-2.02321	0.0539734	0.272971	-4.65282
H2A_1_88 H2AX.GKTGGKAR	0.388179	-4.6517	2.00638	0.0558549	0.272971	-4.68247
H3_27_40 K36me2	0.58681	-6.0794	1.94107	0.063714	0.272971	-4.79584
H3_9_17 K9ac	-0.548464	-5.85721	-1.93015	0.0651182	0.272971	-4.81452
H3_27_40 K27me3K36me2	0.816916	-5.95026	1.91329	0.0673402	0.272971	-4.84322
H2A1_12_17 K13acK15ac	0.381053	-6.31501	1.91257	0.0674371	0.272971	-4.84445
H3_27_40 unmod	-0.538418	-4.95619	-1.90658	0.0682428	0.272971	-4.8546
H2AJ_4_11 unmod	-0.512124	-5.55674	-1.81239	0.0820701	0.291176	-5.01108
H3_73_83 K79me2	0.27031	-4.45988	1.78411	0.0866665	0.291176	-5.05689
H2AV_1_19 K4acK7ac	1.0492	-6.63334	1.77461	0.0882599	0.291176	-5.07216
H1_1_35 H12.SETAPAAPAAAPPAEKAPVKKKAAKKAGGTPR	1.15796	-5.31024	1.73626	0.0949458	0.291176	-5.13313
H3_27_40 K27me3	0.328612	-1.80506	1.7327	0.0955888	0.291176	-5.13874
H2A3_12_17 K15ac	0.331339	-6.4448	1.71607	0.098637	0.291176	-5.16482
H2A3_12_17 K15me1	0.165611	0.138997	1.71555	0.0987327	0.291176	-5.16562
H2A1_12_17 K15ac	-0.140756	-0.404136	-1.69053	0.103479	0.291176	-5.20449
H2AV_1_19 K7ac	2.04379	-10.1405	1.67926	0.105677	0.291176	-5.22183
H4_4_17 unmod	-0.169733	0.415461	-1.6718	0.107155	0.291176	-5.23327
H3_54_63 unmod	-1.16112	7.70799	-1.66953	0.107609	0.291176	-5.23675
H3_27_40 K27me3K36me1	0.557868	-5.66232	1.64456	0.112698	0.296235	-5.27469
H4_20_23 K20me1	0.345075	-3.01664	1.61588	0.11879	0.299421	-5.3177
H2AZ_1_19 K11ac	-0.974033	-6.85834	-1.59423	0.12357	0.299421	-5.34977
H3_27_40 K27me2	-0.361784	-1.09388	-1.59377	0.123674	0.299421	-5.35045
H2A1_12_17 unmod	0.124679	0.316873	1.56131	0.131142	0.30936	-5.39787
H2AZ_1_19 K4acK7ac	1.55774	-6.47176	1.50876	0.144016	0.331236	-5.47293
H2A_1_88 H2A14s.HLQLAIR	-0.281144	3.68356	-1.49002	0.148848	0.332987	-5.49918
H3_18_26 K23ac	0.156321	-1.99771	1.478	0.152016	0.332987	-5.51588
H2A1_72_77 unmod	-0.799829	10.4772	-1.43738	0.163129	0.343761	-5.57146
H33_27_40 K36me3	-0.863979	-5.14819	-1.43284	0.164408	0.343761	-5.57758
H1_54_81 H11.GGVSLAALKKALAAAGYDVEKNNSR	0.880113	-5.84483	1.39433	0.175602	0.359009	-5.62893
H33_27_40 K27me2K36me1	0.376513	-3.93671	1.31513	0.200515	0.395508	-5.73076
H2AX_4_11 unmod	0.182655	-3.32135	1.3105	0.202053	0.395508	-5.73656
H4_4_17 K8ac	-0.281648	-4.4936	-1.24883	0.223404	0.427372	-5.81202
H33_27_40 K27me1K36me3	0.251547	-4.19203	1.23719	0.227622	0.427372	-5.82592
H2A1_4_11 K5acK9ac	-0.709221	-6.88622	-1.17313	0.251906	0.463506	-5.90028
H2AZ_1_19 K4ac	0.420166	-5.90484	1.11426	0.275867	0.489048	-5.9655
H33_27_40 K27me3K36me1	-0.190256	-3.92392	-1.11295	0.276419	0.489048	-5.96692
H3_27_40 K27me2K36me1	-0.724997	-4.65647	-1.09749	0.282985	0.491219	-5.98352
H3_27_40 K27me1K36me1	-0.316428	-6.23627	-1.08374	0.28892	0.492235	-5.99812
H2B_1_29 1B.PEPSKSAPAPKKGSKKAITKAQKKDGKKR	0.308768	-5.13872	1.06538	0.296984	0.496774	-6.01735
H3_9_17 K9me2K14ac	-0.0954012	-3.47721	-1.04849	0.304538	0.500313	-6.03476
H3_9_17 unmod	-0.0995475	-1.53749	-1.01031	0.322119	0.519877	-6.07322
H1_54_81 H15.NGLSLAALKKALAAGGYDVEKNNSR	-0.619619	-1.85532	-0.998387	0.327749	0.519877	-6.08495
H3_27_40 K27me1K36me2	0.147784	-3.07284	0.957889	0.347379	0.529886	-6.12386
H33_27_40 K27me3	-0.173485	-2.92567	-0.950421	0.351084	0.529886	-6.13087
H2A1_4_11 unmod	0.192255	4.42319	0.949911	0.351337	0.529886	-6.13135
H3_9_17 K9me1	-0.0850191	-2.7152	-0.918425	0.367256	0.54186	-6.16033
H2A1_1_11 S1ac	-0.45142	-1.71751	-0.911044	0.371056	0.54186	-6.16699
H3_9_17 K9me3K14ac	0.15955	-4.8413	0.885671	0.384315	0.550681	-6.18952
H33_27_40 K27me2K36me2	-0.744646	-6.17268	-0.876101	0.389395	0.550681	-6.19786
H2AZ_1_19 unmod	0.265671	2.93421	0.865536	0.395053	0.550681	-6.20696
H2A1_1_11 K5ac	0.413198	-0.246015	0.780546	0.442468	0.601503	-6.27643
H1_1_35 H15.SETAPAETATPAPVEKSPAKKKATKKAAGAGAAKR	-0.389523	-2.36374	-0.776878	0.444589	0.601503	-6.27928
H2AX_4_11 K9me1	-0.0683094	0.840431	-0.734248	0.469694	0.626259	-6.3114
H3_18_26 K18ac	-0.127466	-4.03743	-0.672186	0.507689	0.667249	-6.35507
H2B_1_29 1N.PEPSKSAPAPKKGSKKAVTKAQKKDGKKR	-0.14771	-5.19572	-0.646991	0.52359	0.678455	-6.37174
H2B_1_29 1L.PELAKSAPAPKKGSKKAVTKAQKKDGKKR	-0.151815	-5.77062	-0.562542	0.578804	0.737557	-6.4231
H3_18_26 unmod	-0.0467012	1.37019	-0.542089	0.592602	0.737557	-6.43449
H3_18_26 K18acK23ac	-0.0636121	-6.4353	-0.541131	0.593253	0.737557	-6.43501
H4_4_17 K5ac	-0.128326	-5.88681	-0.504478	0.618385	0.751783	-6.45435
H2AJ_4_11 K5acK9ac	0.100602	5.0293	0.482523	0.633672	0.751783	-6.46531
H3_27_40 K27me2K36me2	0.252134	-6.42738	0.480146	0.635338	0.751783	-6.46646
H1_54_81 H1v234.SGVSLAALKKALAAAGYDVEKNNSR	0.265597	1.37059	0.474159	0.639541	0.751783	-6.46935
H33_27_40 K27me1K36me2	-0.0619015	-2.02884	-0.458396	0.650666	0.751783	-6.47679
H2B_1_29 1H.PDPAKSAPAPKKGSKKAVTKAQKKDGKKR	0.149616	-3.36785	0.454083	0.653724	0.751783	-6.47878
H3_3_8 unmod	0.0600811	3.26688	0.440833	0.663159	0.753217	-6.48478
H3_3_8 K4me1	-0.0598117	-3.30673	-0.421584	0.676966	0.759523	-6.49319
H2A1_4_11 K5ac	0.0538312	-5.16672	0.297266	0.768743	0.848302	-6.53856
H2A_1_88 H2AZ.AGGKAGKDSGKAKTKAVSR	0.0573746	-5.11865	0.289595	0.774537	0.848302	-6.54085
H3_27_40 K27me1	0.0723159	-6.09452	0.214476	0.831932	0.900444	-6.56013
H2AX_4_11 K5me1	0.0169287	-1.59069	0.197091	0.845365	0.904344	-6.56377
H2B_1_29 1M.PEPVKSAPVPKKGSKKAINKAQKKDGKKR	0.0291591	-6.35931	0.164042	0.87103	0.921089	-6.56986
H3_27_40 K27me1K36me3	0.0304798	-4.36404	0.114641	0.909654	0.951002	-6.57688
H4_20_23 K20me2	-0.0101308	1.92628	-0.0562401	0.955602	0.979496	-6.58197
H2A1_1_11 unmod	-0.0228952	-1.80039	-0.0529429	0.958202	0.979496	-6.58216
H3_27_40 K36me3	-0.00882933	-5.26279	-0.0123005	0.990284	0.990514	-6.58351
H33_27_40 K27me2	-0.00454661	-2.54965	-0.0120104	0.990514	0.990514	-6.58351

## Sheet: Stats_Peptides_Peritumor_vs_Con
Peptide	logFC	AveExpr	t	P.Value	adj.P.Val	B
H2A1_4_11 K5acK9ac	-1.92816	-7.49569	-3.32597	0.00275309	0.253284	-1.58006
H2AV_1_19 K7ac	2.43104	-9.94684	2.47165	0.0207015	0.525731	-3.18543
H4_20_23 unmod	-0.725481	-6.93825	-2.43983	0.0222191	0.525731	-3.24087
H2AV_1_19 unmod	-0.751793	3.7482	-2.42703	0.0228579	0.525731	-3.26305
H2AZ_1_19 unmod	0.478009	3.04037	2.32494	0.028592	0.526093	-3.43764
H4_4_17 K8acK12ac	1.80229	-10.8846	2.22323	0.0355838	0.545618	-3.60714
H3_73_83 unmod	-0.327926	3.94788	-2.13563	0.04281	0.562645	-3.74937
H33_27_40 K27me1K36me3	0.552019	-4.04179	1.9721	0.0598911	0.688748	-4.0048
H2A1_4_11 unmod	0.285424	4.46977	1.79626	0.0846906	0.749703	-4.26356
H4_4_17 unmod	0.202368	0.601511	1.77881	0.0875777	0.749703	-4.28828
H3_9_17 K9ac	-0.362267	-5.76412	-1.72981	0.0961391	0.749703	-4.35675
H3_9_17 K14ac	-0.185335	-3.24188	-1.7208	0.0977874	0.749703	-4.36917
H3_27_40 K27me1K36me1	-0.611996	-6.38405	-1.52899	0.13897	0.861795	-4.62184
H2AZ_1_19 K11ac	-0.976847	-6.85975	-1.47645	0.152454	0.861795	-4.68689
H2B_1_29 1D.PEPTKSAPAPKKGSKKAVTKAQKKDGKKR	-0.195469	-3.39523	-1.41226	0.170344	0.861795	-4.76384
H2B_1_29 1H.PDPAKSAPAPKKGSKKAVTKAQKKDGKKR	0.294693	-3.29531	1.41031	0.170914	0.861795	-4.76614
H2A3_12_17 K15me1	-0.158175	-0.0228966	-1.36548	0.184406	0.861795	-4.81813
H2B_1_29 1N.PEPSKSAPAPKKGSKKAVTKAQKKDGKKR	0.320052	-4.96184	1.36013	0.186069	0.861795	-4.82424
H3_9_17 K9me2K14ac	-0.182859	-3.52094	-1.33969	0.192539	0.861795	-4.8474
H4_20_23 K20me3	0.229403	-3.36491	1.3045	0.204084	0.861795	-4.88657
H3_9_17 K9me1K14ac	-0.0968533	-3.65625	-1.27053	0.215729	0.861795	-4.92355
H1_54_81 H15.NGLSLAALKKALAAGGYDVEKNNSR	-0.972367	-2.03169	-1.1956	0.2432	0.861795	-5.0021
H3_27_40 K27me3K36me1	0.218055	-5.83223	1.14117	0.264737	0.861795	-5.05654
H3_27_40 unmod	-0.28994	-4.83195	-1.13666	0.266584	0.861795	-5.06095
H33_27_40 K27me2K36me2	-0.644956	-6.12283	-1.13278	0.268177	0.861795	-5.06473
H33_27_40 K36me3	-0.80788	-5.12014	-1.13179	0.268586	0.861795	-5.0657
H2B_1_29 1L.PELAKSAPAPKKGSKKAVTKAQKKDGKKR	-0.280593	-5.83501	-1.08059	0.290314	0.861795	-5.11448
H3_27_40 K36me2	-0.268338	-6.50698	-1.0795	0.290791	0.861795	-5.1155
H3_9_17 K9me2	0.130827	-2.16612	1.06507	0.297142	0.861795	-5.12887
H3_73_83 K79me2	0.160029	-4.51502	1.05212	0.302927	0.861795	-5.14073
H2A3_12_17 unmod	0.108049	-0.10909	1.02043	0.317411	0.861795	-5.1692
H33_27_40 K27me1K36me2	-0.239437	-2.11761	-1.01153	0.321566	0.861795	-5.17706
H33_27_40 K36me2	0.422953	-5.18995	1.00597	0.324181	0.861795	-5.18193
H2B_1_29 2F.PDPAKSAPAPKKGSKKAVTKVQKKDGKKR	-0.222911	-4.09794	-0.973947	0.339522	0.861795	-5.20953
H2A1_12_17 unmod	-0.0847764	0.212146	-0.969555	0.341664	0.861795	-5.21325
H3_27_40 K27me2	-0.119719	-0.972846	-0.966922	0.342952	0.861795	-5.21548
H2A1_12_17 K15ac	0.085131	-0.291192	0.936771	0.357943	0.861795	-5.24054
H3_9_17 K9me3	0.122666	-3.46391	0.934323	0.359179	0.861795	-5.24255
H3_27_40 K36me3	-0.784682	-5.65072	-0.9194	0.366775	0.861795	-5.25465
H1_54_81 H1v234.SGVSLAALKKALAAAGYDVEKNNSR	0.652054	1.56381	0.884162	0.385131	0.861795	-5.28252
H2AX_4_11 unmod	-0.125496	-3.47542	-0.883057	0.385716	0.861795	-5.28338
H3_9_17 unmod	0.106159	-1.43464	0.835531	0.411426	0.861795	-5.31931
H3_18_26 K18acK23ac	-0.134989	-6.47098	-0.825966	0.416728	0.861795	-5.32632
H4_20_23 K20me2	-0.112641	1.87503	-0.820441	0.41981	0.861795	-5.33033
H4_20_23 K20me1	0.108197	-3.13508	0.780876	0.442293	0.861795	-5.35833
H3_27_40 K27me1K36me2	0.149295	-3.07208	0.774107	0.446211	0.861795	-5.36299
H2AJ_4_11 unmod	0.135191	-5.23309	0.766633	0.450562	0.861795	-5.36809
H2A1_4_11 K5ac	-0.129571	-5.25842	-0.756509	0.456497	0.861795	-5.37492
H2A1_72_77 unmod	-0.414745	10.6697	-0.718163	0.479393	0.861795	-5.40001
H1_54_81 H11.GGVSLAALKKALAAAGYDVEKNNSR	-0.390947	-6.48036	-0.711016	0.483733	0.861795	-5.40455
H2AV_1_19 K4acK7ac	0.673607	-6.82114	0.708653	0.485172	0.861795	-5.40605
H3_27_40 K27me3K36me2	0.396329	-6.16056	0.695523	0.493218	0.861795	-5.41425
H3_27_40 K27me2K36me2	-0.512952	-6.80992	-0.690252	0.496469	0.861795	-5.4175
H2A_1_88 H2AZ.AGGKAGKDSGKAKTKAVSR	0.0881947	-5.10324	0.633863	0.531995	0.903313	-5.45079
H1_1_35 H13.SETAPLAPTIPAPAEKTPVKKKAKKAGATAGKR	0.266347	-2.59356	0.621406	0.540024	0.903313	-5.45778
H2B_1_29 1B.PEPSKSAPAPKKGSKKAITKAQKKDGKKR	0.231905	-5.17715	0.604449	0.551055	0.905305	-5.46707
H33_27_40 K27me3	0.0740996	-2.80188	0.551147	0.586483	0.923715	-5.49466
H33_27_40 K27me3K36me1	0.0460266	-3.80578	0.541936	0.592717	0.923715	-5.49918
H2AJ_4_11 K5acK9ac	-0.0986896	4.92965	-0.526869	0.602983	0.923715	-5.50641
H1_1_35 H15.SETAPAETATPAPVEKSPAKKKATKKAAGAGAAKR	-0.219848	-2.2789	-0.489503	0.628803	0.923715	-5.52348
H33_27_40 K27me2	-0.209535	-2.65215	-0.442639	0.661877	0.923715	-5.54316
H2A1_1_11 K5ac	0.207621	-0.348804	0.433967	0.668078	0.923715	-5.54658
H2A_1_88 H2A14s.HLQLAIR	-0.0420035	3.80313	-0.408508	0.686419	0.923715	-5.55626
H33_27_40 K27me2K36me1	0.127254	-4.06133	0.405292	0.68875	0.923715	-5.55744
H3_27_40 K27me1K36me3	-0.0588077	-4.40868	-0.397091	0.69471	0.923715	-5.56041
H2AX_4_11 K9me1	0.0360095	0.89259	0.396677	0.695011	0.923715	-5.56056
H1_1_35 H12.SETAPAAPAAAPPAEKAPVKKKAAKKAGGTPR	0.158886	-5.80978	0.38489	0.703612	0.923715	-5.56472
H3_18_26 K18ac	-0.101201	-4.0243	-0.383119	0.704908	0.923715	-5.56534
H3_18_26 unmod	0.029078	1.40808	0.370843	0.713915	0.923715	-5.56952
H2AX_4_11 K5me1	0.0310441	-1.58363	0.36942	0.714961	0.923715	-5.57
H2A1_1_11 unmod	-0.170127	-1.87401	-0.368655	0.715524	0.923715	-5.57025
H4_4_17 K8ac	-0.116549	-4.41105	-0.358644	0.722908	0.923715	-5.57354
H2AZ_1_19 K4ac	-0.179088	-6.20447	-0.322505	0.749783	0.939335	-5.58468
H3_27_40 K27me1	0.103931	-6.07871	0.314806	0.755552	0.939335	-5.5869
H2AZ_1_19 K4acK7ac	-0.378354	-7.43981	-0.299037	0.767413	0.94136	-5.59128
H2B_1_29 1M.PEPVKSAPVPKKGSKKAINKAQKKDGKKR	-0.0434484	-6.39561	-0.263256	0.794536	0.9447	-5.6004
H3_9_17 K9me3K14ac	-0.0607054	-4.95142	-0.255738	0.80027	0.9447	-5.60217
H4_4_17 K16ac	-0.0424336	-1.93866	-0.254859	0.800942	0.9447	-5.60237
H1_1_35 H14.SETAPAAPAAPAPAEKTPVKKKAR	0.0828259	0.470419	0.209976	0.835408	0.953875	-5.61184
H4_4_17 K5ac	0.094308	-5.7755	0.208045	0.836899	0.953875	-5.61221
H3_27_40 K27me2K36me1	-0.0679941	-4.32797	-0.204258	0.839825	0.953875	-5.61292
H2B_1_29 1C.PEPAKSAPAPKKGSKKAVTKAQKKDGKKR	0.0202734	0.842014	0.126673	0.900224	0.987311	-5.62458
H3_27_40 K27me3	-0.0234906	-1.98111	-0.110343	0.913029	0.987311	-5.62634
H3_3_8 unmod	0.0151023	3.24439	0.0893047	0.92956	0.987311	-5.62825
H2A1_12_17 K13acK15ac	0.0191162	-6.49598	0.0841713	0.933598	0.987311	-5.62865
H3_3_8 K4me1	-0.014466	-3.28406	-0.0834164	0.934193	0.987311	-5.62871
H3_54_63 unmod	-0.0437473	8.26668	-0.0711546	0.943848	0.987311	-5.62957
H2A3_12_17 K15ac	0.0134731	-6.60373	0.0581586	0.95409	0.987311	-5.63033
H2A1_1_11 S1ac	-0.018618	-1.50111	-0.0500317	0.960499	0.987311	-5.63073
H2A_1_88 H2AX.GKTGGKAR	-0.00540271	-4.84849	-0.0416371	0.967123	0.987311	-5.63108
H3_9_17 K9me1	-0.00293832	-2.67416	-0.0296565	0.976579	0.987311	-5.63147
H3_18_26 K23ac	0.00180624	-2.07497	0.0133082	0.989489	0.989489	-5.63179

## Sheet: Stats_PTMs_Tumor_vs_Control
PTM	logFC	AveExpr	t	P.Value	adj.P.Val	B
H13	1.9709	-1.74128	4.56596	0.0001115	0.00691301	1.18076
H14	-1.61218	-0.377083	-4.25821	0.000248588	0.00770622	0.414816
H3K14ac	-0.323791	-1.35305	-3.95314	0.000547786	0.00856529	-0.337181
H2B1F	-0.656488	-4.31473	-3.89881	0.000630053	0.00856529	-0.469983
H4K20me3	-0.812524	-3.88587	-3.86303	0.000690749	0.00856529	-0.55721
H2B1D	-0.600022	-3.5975	-3.13887	0.00427034	0.0441269	-2.2696
H3K9me3	0.489859	-2.68433	3.03511	0.005497	0.0486877	-2.50388
H3K9me2	0.270413	-1.35465	2.70568	0.0120176	0.0931364	-3.22265
H3K9me1	-0.19102	-1.97722	-2.40158	0.0239698	0.161093	-3.84571
H2B1C	0.31644	0.990097	2.36503	0.0259827	0.161093	-3.9176
H2AVK7ac	0.731986	-4.72836	2.26397	0.0323796	0.182503	-4.1127
H31K27me3	0.418617	-1.40455	2.09113	0.0466947	0.241256	-4.43315
H2AX.GKTGGKAR	0.388179	-4.6517	2.01589	0.0545282	0.260058	-4.56713
H2A1K13ac	0.36766	-6.26223	1.96107	0.0609459	0.269903	-4.66253
H3K79me2	0.27031	-4.45988	1.78484	0.0862623	0.335658	-4.95592
H12	1.15796	-5.31024	1.75559	0.0912395	0.335658	-5.00258
H31K27me2	-0.441684	-0.53861	-1.72675	0.0963821	0.335658	-5.04798
H2A3K15me1	0.165611	0.138997	1.68899	0.103487	0.335658	-5.10654
H4K16ac	0.250435	-1.45226	1.6726	0.106707	0.335658	-5.13165
H2AZK11ac	-0.625541	-5.81808	-1.66476	0.108277	0.335658	-5.14359
H4K20me1	0.345075	-3.01664	1.62555	0.116417	0.343707	-5.20262
H3K9ac	-0.353754	-5.4378	-1.56807	0.129265	0.362669	-5.28709
H2A3K15ac	0.289031	-5.82457	1.52801	0.138895	0.362669	-5.34449
H2A1K15ac	-0.124688	-0.322962	-1.522	0.140388	0.362669	-5.353
H2A14s.HLQLAIR	-0.281144	3.68356	-1.49655	0.14686	0.364212	-5.38871
H11	0.880113	-5.84483	1.40976	0.170765	0.381169	-5.50669
H33K36me1	0.24887	-2.53255	1.39902	0.173926	0.381169	-5.52086
H31K36me2	0.25383	-2.33152	1.39289	0.175752	0.381169	-5.52892
H3K23ac	0.143285	-1.89164	1.38445	0.178289	0.381169	-5.53996
H2AVK11ac	0.754995	-6.50238	1.25754	0.22002	0.454709	-5.69893
H2A1K5ac	-0.26227	-4.56919	-1.20412	0.239666	0.479333	-5.76184
H2A1K9ac	-0.548082	-6.49811	-1.12009	0.273178	0.518511	-5.85586
H33K36me3	-0.243132	-3.22477	-1.09111	0.285488	0.518511	-5.88686
H2AVK4ac	0.324531	-4.68928	1.0836	0.288743	0.518511	-5.89477
H2B1B	0.308768	-5.13872	1.07453	0.292708	0.518511	-5.90426
H4K12ac	0.266028	-3.25626	1.02681	0.314209	0.530362	-5.95299
H15_2	-0.619619	-1.85532	-1.00941	0.322319	0.530362	-5.97026
H4K8ac	0.151176	-3.34381	0.986893	0.333023	0.530362	-5.9922
H2AZK4ac	0.451858	-4.04416	0.985663	0.333615	0.530362	-5.99338
H2AZK7ac	-0.328213	-3.82286	-0.852781	0.401767	0.62274	-6.11329
H3K18ac	-0.128941	-3.73201	-0.795086	0.433946	0.64898	-6.16027
H15	-0.389523	-2.36374	-0.785171	0.439632	0.64898	-6.16803
H33K36me2	0.151996	-0.544589	0.735268	0.468925	0.669939	-6.20567
H2AXK9me1	-0.0683094	0.840431	-0.721415	0.477257	0.669939	-6.2157
H33K27me1	0.101483	-1.40488	0.706623	0.486246	0.669939	-6.2262
H31K36me3	0.153016	-3.41382	0.653794	0.519132	0.681752	-6.26202
H2B1N	-0.14771	-5.19572	-0.651322	0.520701	0.681752	-6.26363
H31K27me1	0.0877206	-2.06208	0.640169	0.527808	0.681752	-6.27082
H2B1L	-0.151815	-5.77062	-0.567108	0.575629	0.723302	-6.31495
H2AJK5ac	0.113845	5.0853	0.546314	0.589627	0.723302	-6.32656
H4K5ac	0.152075	-4.97478	0.538435	0.594974	0.723302	-6.33085
H2AJK9ac	0.103105	5.0327	0.496899	0.623543	0.743455	-6.35244
H1v234	0.265597	1.37059	0.479319	0.635821	0.743791	-6.36107
H2B1H	0.149616	-3.36785	0.458306	0.650638	0.747029	-6.37099
H33K27me3	-0.0760742	-2.0315	-0.436163	0.666411	0.749793	-6.38096
H3K4me1	-0.0598117	-3.30673	-0.421099	0.677232	0.749793	-6.38747
H31K36me1	-0.126867	-3.20101	-0.363689	0.719107	0.782186	-6.4102
H2AZ.AGGKAGKDSGKAKTKAVSR	0.0573746	-5.11865	0.291061	0.773373	0.826709	-6.43424
H33K27me2	-0.0440292	-0.658885	-0.238327	0.813543	0.85491	-6.44837
H2AXK5me1	0.0169287	-1.59069	0.1927	0.84873	0.877021	-6.45833
H2B1M	0.0291591	-6.35931	0.164611	0.870556	0.884828	-6.46342
H4K20me2	-0.0101308	1.92628	-0.0564471	0.955428	0.955428	-6.47555

## Sheet: Stats_PTMs_Peritumor_vs_Control
PTM	logFC	AveExpr	t	P.Value	adj.P.Val	B
H2A1K9ac	-1.05662	-6.75238	-2.4209	0.0229507	0.914443	-4.08751
H2A1K5ac	-0.363658	-4.61989	-2.05057	0.0507641	0.914443	-4.24996
H3K14ac	-0.171164	-1.27674	-1.77037	0.0886737	0.914443	-4.36384
H2AZK7ac	-0.495454	-3.90649	-1.64135	0.113056	0.914443	-4.41287
H31K36me2	0.328883	-2.29399	1.55269	0.132873	0.914443	-4.44513
H3K9ac	-0.250349	-5.3861	-1.44939	0.159469	0.914443	-4.48114
H2B1H	0.294693	-3.29531	1.41943	0.167935	0.914443	-4.49124
H2B1D	-0.195469	-3.39523	-1.40863	0.171073	0.914443	-4.49485
H2B1N	0.320052	-4.96184	1.37099	0.182374	0.914443	-4.50725
H2A3K15me1	-0.158175	-0.0228966	-1.35278	0.188051	0.914443	-4.51316
H4K20me3	0.229403	-3.36491	1.3091	0.202223	0.914443	-4.52708
H31K27me3	0.178405	-1.52466	1.30907	0.202235	0.914443	-4.52709
H2AVK7ac	0.454675	-4.86702	1.28914	0.208969	0.914443	-4.53332
H33K27me2	-0.279847	-0.776794	-1.23149	0.229423	0.914443	-4.55093
H15_2	-0.972367	-2.03169	-1.21142	0.23689	0.914443	-4.55691
H2B1L	-0.280593	-5.83501	-1.09032	0.285812	0.914443	-4.59127
H4K16ac	-0.193189	-1.67407	-1.07989	0.290342	0.914443	-4.59409
H3K79me2	0.160029	-4.51502	1.0523	0.302575	0.914443	-4.60143
H2B1F	-0.222911	-4.09794	-0.98141	0.33565	0.914443	-4.61954
H33K36me1	0.17085	-2.57156	0.980127	0.336271	0.914443	-4.61986
H2A1K15ac	0.0872473	-0.216994	0.97339	0.339542	0.914443	-4.62153
H4K12ac	-0.227165	-3.50286	-0.971286	0.340568	0.914443	-4.62204
H4K8ac	0.166154	-3.33632	0.950361	0.350888	0.914443	-4.62713
H33K27me1	0.153733	-1.37875	0.897276	0.378001	0.914443	-4.63961
H1v234	0.652054	1.56381	0.895764	0.378793	0.914443	-4.63995
H4K20me2	-0.112641	1.87503	-0.818117	0.420902	0.914443	-4.65701
H4K20me1	0.108197	-3.13508	0.778894	0.443241	0.914443	-4.66509
H33K36me2	-0.170146	-0.705661	-0.776468	0.444646	0.914443	-4.66558
H11	-0.390947	-6.48036	-0.720013	0.478093	0.914443	-4.67654
H33K27me3	0.0716697	-1.95763	0.666567	0.511061	0.914443	-4.6862
H3K9me1	-0.0509176	-1.90717	-0.654904	0.518419	0.914443	-4.68822
H31K36me1	-0.154316	-3.21474	-0.652184	0.520143	0.914443	-4.68868
H2AZK11ac	-0.189729	-5.60018	-0.63727	0.529654	0.914443	-4.6912
H2AZ.AGGKAGKDSGKAKTKAVSR	0.0881947	-5.10324	0.632337	0.53282	0.914443	-4.69202
H13	0.266347	-2.59356	0.628847	0.535066	0.914443	-4.6926
H2B1B	0.231905	-5.17715	0.611428	0.546352	0.914443	-4.69543
H31K36me3	-0.160574	-3.57061	-0.57559	0.569959	0.914443	-4.70103
H2AJK5ac	-0.101261	4.97775	-0.53518	0.597182	0.914443	-4.70695
H2AVK4ac	0.194411	-4.75434	0.533562	0.598285	0.914443	-4.70718
H2AJK9ac	-0.0978619	4.93221	-0.524342	0.604588	0.914443	-4.70847
H15	-0.219848	-2.2789	-0.49544	0.62455	0.914443	-4.71237
H3K18ac	-0.10183	-3.71845	-0.44438	0.660532	0.914443	-4.71874
H2A14s.HLQLAIR	-0.0420035	3.80313	-0.402285	0.690841	0.914443	-4.72348
H12	0.158886	-5.80978	0.389447	0.700193	0.914443	-4.72484
H2AXK9me1	0.0360095	0.89259	0.387561	0.701571	0.914443	-4.72503
H2A3K15ac	0.0870282	-5.92557	0.381468	0.706029	0.914443	-4.72566
H31K27me2	-0.0822489	-0.358892	-0.368301	0.715702	0.914443	-4.72697
H3K9me3	0.0548349	-2.90184	0.358997	0.722565	0.914443	-4.72788
H2AXK5me1	0.0310441	-1.58363	0.358808	0.722705	0.914443	-4.7279
H4K5ac	0.0994794	-5.00108	0.322419	0.749775	0.929721	-4.73121
H3K9me2	0.0367763	-1.47147	0.296867	0.768983	0.934842	-4.73333
H2B1M	-0.0434484	-6.39561	-0.263828	0.794042	0.944837	-4.73581
H2AVK11ac	-0.164974	-6.96237	-0.24597	0.807683	0.944837	-4.73703
H14	0.0828259	0.470419	0.212425	0.833472	0.945009	-4.73909
H33K36me3	0.041868	-3.08227	0.205233	0.839026	0.945009	-4.7395
H2AZK4ac	-0.089715	-4.31495	-0.186471	0.853557	0.945009	-4.74049
H2B1C	0.0202734	0.842014	0.126858	0.900052	0.979004	-4.743
H3K4me1	-0.014466	-3.28406	-0.0836872	0.933961	0.98583	-4.74422
H2AX.GKTGGKAR	-0.00540271	-4.84849	-0.041439	0.96727	0.98583	-4.74493
H3K23ac	-0.00517506	-1.96587	-0.0394252	0.96886	0.98583	-4.74496
H2A1K13ac	0.00500358	-6.44356	0.0230684	0.981776	0.98583	-4.74509
H31K27me1	-0.00322749	-2.10756	-0.0179362	0.98583	0.98583	-4.74512
