# Supplementary material
Source: Research Square preprint supplement (doi:10.21203/rs.3.rs-9763213/v1)
Supplement: Supplementary file 11 [file 92f07ae90cb946e09102bb5f.xlsx]

## Sheet: vst_expression_data_Local
GeneName	C01	T01	C02	T02	C03	T03	C04	T04	C05	T05	C06	T06	C07	T07	C08	T08	C09	T09	C10	T10	C11	T11	C12	T12	C13	T13	C14	T14	C15	T15	C16	T16	C17	T17	C18	T18	C19	T19	C20	T20	C21	T21	C22	T22	C23	T23	C24	T24
ENSG00000000003.15_TSPAN6	8.80448	8.915	9.3171	6.63533	6.14502	6.48842	8.6876	7.11331	8.46368	9.06101	6.97987	7.64392	7.98674	8.31499	8.69322	7.31877	7.55424	6.65564	7.85205	7.71849	8.38487	9.02637	7.91951	8.87673	8.37382	6.00327	8.14363	8.26293	9.39202	6.91537	8.45363	5.89138	7.84087	9.10235	7.80454	7.12914	8.76433	7.55207	8.20253	8.22191	8.42369	8.37168	8.54703	7.8088	8.45244	6.89611	7.93091	8.93079
ENSG00000000419.14_DPM1	5.40462	6.35874	6.29971	5.8391	1.7056	4.6361	5.65339	5.7042	5.60258	7.23975	5.44687	4.39386	6.00639	6.56807	6.09207	5.91066	6.32674	6.32862	5.11495	6.37333	5.91598	7.13104	5.85586	6.64641	6.08406	5.8319	6.03325	6.03331	6.09964	6.38046	6.26166	5.63117	6.0174	7.09901	6.10691	6.23285	5.98822	5.93567	5.8007	5.54044	5.62942	5.83367	6.64478	5.76768	5.88709	6.17387	5.6353	6.998
ENSG00000000457.14_SCYL3	7.00556	6.95409	7.46238	6.42812	6.35416	6.60164	7.15713	7.38164	7.24282	6.93226	7.29147	7.05971	6.9683	6.54072	7.88374	7.71105	6.44	6.27939	7.66294	7.05713	6.832	6.83571	7.14095	6.80217	7.22246	6.57407	7.26374	6.96275	7.71227	6.39223	7.97019	6.73698	7.36272	6.79942	7.21972	7.18249	7.54443	7.70974	7.15926	7.45272	7.50138	7.24618	7.03581	7.3711	7.56327	6.81276	7.73791	6.77118
ENSG00000000460.17_C1orf112	4.97992	5.16711	5.6764	4.10693	5.49307	5.01522	4.87448	5.21453	4.36436	6.15482	5.2354	3.74488	5.95642	5.33445	4.60712	6.82598	4.69796	5.61529	5.17601	5.22275	5.43267	6.52281	4.93003	6.0267	5.81848	4.40396	5.69226	5.95816	3.75906	5.65615	4.85913	5.88982	4.93646	6.45112	5.18868	5.30881	5.52532	6.47466	5.69086	5.20639	5.61559	6.0277	6.16703	4.48651	5.5823	6.01738	6.13777	5.58458
ENSG00000000938.13_FGR	3.4712	3.63781	4.3252	3.50701	1.7056	7.54269	4.09476	5.50039	3.61439	5.26379	5.30036	3.47899	4.58641	5.02627	4.12723	5.23207	5.55136	5.11034	4.14675	4.67542	3.93265	3.96349	4.96502	4.92902	3.78415	5.26707	4.46929	3.69751	3.82175	6.76468	3.33395	7.01212	4.96527	4.36208	4.33857	5.40329	3.79118	4.84557	4.75343	2.57824	4.07206	4.12936	4.65291	4.21204	4.89331	5.91813	5.42935	4.71901
ENSG00000000971.16_CFH	6.46792	4.80569	6.64922	1.7056	1.7056	6.80165	6.37604	4.94816	6.91069	5.25568	4.82488	3.25476	7.86201	4.81595	7.6651	4.59983	7.09633	8.45564	5.94145	6.96805	7.20996	4.83726	9.25781	5.81164	7.10956	7.52012	7.37035	4.46778	6.23205	6.81957	4.93617	5.09231	7.23222	5.52225	8.17786	4.81532	5.27488	6.05858	6.95336	3.95098	7.35494	5.07055	5.28844	5.43568	6.99898	9.10324	6.79783	5.15752
ENSG00000001036.14_FUCA2	8.10879	8.33148	8.4675	9.04371	9.71502	7.9675	8.79154	8.84402	8.0469	8.84507	8.68958	8.57034	8.68181	8.29441	8.35396	8.1982	7.90644	8.74128	8.13098	7.79303	8.45448	8.72232	7.85249	8.16525	7.97222	6.79587	7.601	7.76353	8.41812	8.29162	8.22143	8.15845	7.80174	8.5572	8.0675	8.41164	8.33356	8.69523	7.53101	8.5598	8.10862	8.53167	8.13914	8.17011	7.64737	8.55031	7.69778	8.89008
ENSG00000001084.13_GCLC	7.71852	8.26283	7.95561	8.15112	8.7487	7.49163	7.00621	7.493	6.7894	8.20793	7.06452	8.21538	7.89024	8.05027	7.76165	8.33214	8.73606	8.31081	7.49517	8.01365	7.53135	8.26948	7.47249	7.80453	7.7178	8.58232	7.74997	8.04377	7.54019	7.75655	7.93791	7.09459	8.17002	8.11749	8.0698	7.89636	8.49955	8.42869	7.05885	7.26087	8.39666	8.30417	8.26328	8.18013	8.42086	8.00802	8.39977	8.70032
ENSG00000001167.15_NFYA	7.24504	7.11798	7.0152	7.00828	5.80055	6.93798	6.35951	5.69855	7.9513	8.81504	7.68556	6.21944	7.00456	7.30577	7.71218	7.95743	6.8383	7.23957	7.01718	7.30071	6.96815	8.01279	7.31486	6.54626	7.51619	6.46951	7.44724	7.36913	7.3109	7.34977	7.1127	7.8131	7.53533	7.24041	7.09142	7.29639	7.23278	7.19646	7.62456	7.33539	7.09587	7.87225	7.36065	7.48352	7.39569	7.22264	6.86671	7.61261
ENSG00000001460.18_STPG1	6.39091	5.92201	6.14129	4.221	4.72801	4.62511	5.27415	5.50928	6.3719	5.51663	5.17074	4.97239	5.38571	5.23874	7.11964	3.8471	6.29229	5.20196	6.20933	6.45602	6.36163	4.84826	5.98322	5.04165	5.60668	5.37764	6.2151	5.16108	6.77112	5.57063	6.94322	5.23473	6.55547	5.16689	6.74705	4.22	7.13668	5.70439	6.30986	4.30731	6.49358	4.40052	6.09576	6.54752	6.37985	4.73699	6.28863	5.17845
ENSG00000001461.17_NIPAL3	8.49249	8.13996	8.20661	7.23653	6.5055	6.81612	7.63993	7.50322	7.82678	6.62163	7.29736	7.14912	7.68372	7.37862	7.8997	7.77262	7.86816	8.04301	7.91415	7.31519	7.76742	7.04031	8.23875	7.63867	7.58916	8.49115	8.14347	7.50133	9.03793	7.74412	8.60534	7.61485	7.92026	7.69504	7.90479	7.69258	8.17445	8.16155	8.08672	7.82546	7.87301	7.49493	7.61887	7.78684	8.16945	7.33189	8.00887	8.08002
ENSG00000001497.18_LAS1L	6.53094	7.27838	6.61403	8.12148	5.90996	7.15291	6.61268	7.22501	6.18657	7.41779	5.38684	6.93793	7.25294	7.35735	5.77982	7.48002	6.46854	7.44415	6.14338	6.3226	6.60456	7.30631	6.51852	7.89642	6.73001	7.35672	6.54546	6.87522	6.07936	7.02004	6.27454	7.12695	6.58617	8.13701	6.51997	7.44698	5.98847	6.94068	6.44971	8.05219	6.47593	6.95033	7.11825	6.07315	6.45614	7.0678	7.22783	7.61297
ENSG00000001561.7_ENPP4	7.56991	7.43014	8.02771	5.8225	4.23442	5.66106	7.21257	6.40586	7.85412	7.3027	5.55564	4.74146	7.08416	7.35414	8.18487	6.54331	7.67582	7.46721	6.96233	7.09573	7.87269	7.41505	7.60519	6.74466	7.67087	7.81014	7.46745	6.81276	8.37147	6.70189	7.65665	6.28013	6.86623	7.19099	7.69289	5.4244	8.29158	8.17547	7.19288	5.97468	7.71137	7.88456	6.99339	7.5528	7.59557	7.82802	6.24666	7.55892
ENSG00000001617.12_SEMA3F	5.89321	5.90465	5.9565	8.08163	6.60049	6.85394	6.92353	7.52067	6.22961	6.34895	6.24905	6.45066	6.48255	5.69357	6.23797	8.11643	6.624	5.91528	5.33292	5.35694	6.02139	7.83636	6.52935	7.37356	6.30326	6.56909	6.29231	5.92983	5.55505	7.43153	5.12378	7.5631	5.84699	6.86864	5.22246	5.56526	5.27751	6.66193	6.08584	8.69965	6.1171	6.34101	6.44548	5.41897	6.14673	6.51258	4.75203	5.67339
ENSG00000001626.16_CFTR	10.083	10.3614	10.7212	9.42921	6.60904	4.75888	10.4985	8.87937	9.31087	9.53476	8.33851	8.82034	10.2402	10.9241	8.66698	7.90966	9.15871	6.582	9.73478	8.79698	9.95689	10.7545	9.34885	10.605	10.0421	4.08647	9.53388	10.199	9.41104	9.04502	10.1071	7.91866	8.59099	10.9303	9.92067	9.48746	10.2016	9.13169	9.7681	9.49135	9.62488	10.7632	9.16949	9.43722	9.92321	9.91144	8.15134	11.0941
ENSG00000001629.10_ANKIB1	8.36905	8.45949	8.55094	8.67686	7.68666	8.3225	8.45363	8.48544	8.47429	8.70852	7.95377	8.30593	8.28321	9.0117	8.36293	8.56428	8.25215	8.11011	8.31552	8.58464	8.4771	9.09791	8.49398	9.26525	8.51929	9.05681	8.12765	8.04242	8.70165	8.38648	8.4603	8.52224	8.22316	9.2728	8.60096	8.91252	8.74149	8.47492	8.438	8.45773	8.60196	8.63375	8.79434	8.47669	8.61276	8.74158	8.14487	8.84047
ENSG00000001630.17_CYP51A1	10.3576	9.59406	9.75198	9.28192	10.7961	7.68686	10.1302	9.30876	9.83287	9.428	8.97013	8.88782	9.1819	8.64529	10.0689	8.14308	9.37069	8.72468	9.26473	7.9409	10.7634	10.3599	8.93042	9.09181	9.50127	8.01488	9.16144	9.58657	9.31551	8.62742	9.00266	8.90392	9.04755	9.70418	9.00164	7.77302	10.6738	9.95414	10.0581	9.76249	9.09646	9.40749	8.90828	9.09831	9.06374	8.98489	9.02935	10.397
ENSG00000001631.16_KRIT1	7.61897	7.11016	7.29615	7.0575	7.34783	7.20776	6.77196	6.54854	7.11046	7.37723	5.9086	5.85339	6.61078	7.66845	6.74363	7.35662	7.22474	7.36831	6.71858	7.44521	6.98082	8.19599	7.42692	7.55802	7.10055	7.52242	7.21615	6.99324	7.09932	7.18119	7.07591	7.36814	7.05059	7.92833	7.02727	7.69793	7.25464	7.77084	7.80726	7.48525	7.33684	7.34088	7.67011	6.42198	7.4885	7.2883	6.93978	7.35344
ENSG00000002016.18_RAD52	6.63645	6.83483	5.81463	6.39629	5.56295	5.66832	6.16451	5.8615	7.12119	6.38439	6.93328	7.19585	6.25882	6.20452	7.19643	5.80922	5.91279	6.09678	7.42018	6.71811	6.15526	6.39044	6.13191	6.00112	6.78295	6.62563	6.84353	6.28903	7.25641	5.91942	6.86899	5.97002	7.01546	5.9256	6.62252	6.95256	7.21259	6.90597	6.96747	6.1952	6.7588	6.00483	7.14554	7.11225	7.07051	5.75421	7.14206	5.70276
ENSG00000002330.14_BAD	7.23392	7.05521	7.63705	6.68714	7.38221	6.0499	7.58634	7.32844	7.10241	6.85511	7.7348	7.46034	7.52054	6.65332	7.39552	6.18395	7.26002	6.22179	7.46267	7.68641	7.5346	6.09074	7.31913	6.21478	6.95068	7.27604	6.89592	6.38656	7.41255	6.37006	7.28797	6.90122	7.24036	5.68232	7.25362	5.69407	7.1918	6.73351	6.63391	6.97582	7.18891	6.64616	6.61556	7.06945	6.89185	6.34834	7.16854	6.2733
ENSG00000002549.13_LAP3	8.16045	8.05607	8.64827	7.46514	7.82784	8.06008	7.85171	7.64898	8.7371	7.59037	8.68476	7.90045	8.50129	8.72122	8.56333	6.88274	8.77684	10.6583	8.43335	8.79353	9.43901	8.22036	8.14099	9.40581	8.81636	7.63931	8.20097	8.37394	8.00179	9.68411	8.89352	7.78987	9.59905	9.51417	8.97254	7.80496	10.1869	9.4391	7.76823	7.41251	8.81346	7.95836	8.37971	9.04408	9.28649	9.80244	8.49391	7.58032
ENSG00000002586.20_CD99	8.18047	8.02033	8.11035	8.40754	7.56268	7.7146	8.92257	7.69603	7.33041	8.45009	8.32201	7.69153	9.15835	7.81658	7.29626	6.74414	7.81413	7.99111	7.55451	7.1415	7.79582	5.96554	8.49314	6.59776	7.51146	9.73852	7.87153	8.41559	6.96774	7.04459	7.08697	7.75155	7.31429	6.68693	8.0913	5.77801	8.09217	6.96208	7.29185	8.42353	7.90774	7.85766	7.23339	7.51647	7.40385	7.63215	7.37345	7.67302
ENSG00000002586.20_PAR_Y_CD99	8.18047	8.02033	8.11035	8.40754	7.56268	7.7146	8.92257	7.69603	7.33041	8.45009	8.32201	7.69153	9.15835	7.81658	7.29626	6.74414	7.81413	7.99111	7.55451	7.1415	7.79582	5.96554	8.49314	6.59776	7.51146	9.73852	7.87153	8.41559	6.96774	7.04459	7.08697	7.75155	7.31429	6.68693	8.0913	5.77801	8.09217	6.96208	7.29185	8.42353	7.90774	7.85766	7.23339	7.51647	7.40385	7.63215	7.37345	7.67302
ENSG00000002587.10_HS3ST1	5.23188	5.20148	5.55728	5.92482	1.7056	6.27984	5.32575	5.14244	6.24462	4.9331	4.96687	5.21936	5.30966	5.53598	5.20505	4.2898	4.8379	6.43928	4.98588	5.04705	5.72008	6.31079	4.85992	6.35755	5.33111	4.77856	4.16735	5.00349	5.44933	6.97948	4.28549	5.57198	4.89247	6.44188	4.31422	5.4249	4.17843	6.15817	4.83864	6.17174	4.81485	6.27774	5.32411	5.41793	5.11418	8.5559	5.67036	5.1258
ENSG00000002726.21_AOC1	11.043	10.9708	11.7788	9.0483	11.3725	9.18654	10.6062	10.5421	12.3565	9.99456	11.1627	9.93464	10.5488	10.7188	11.8847	8.46979	10.5947	8.37279	11.7329	10.6097	11.4774	9.24972	10.847	8.71477	10.9703	3.86787	10.6837	7.69604	12.3623	9.64079	12.0547	6.65548	11.2652	8.80988	10.9603	7.20741	12.089	10.824	10.5937	9.90033	10.9802	10.2199	10.9352	11.7309	10.2526	7.57505	10.1468	9.52696
ENSG00000002822.16_MAD1L1	6.09006	6.97834	6.07114	7.77009	7.10972	7.86355	6.47375	8.49691	6.7393	7.04732	8.03564	8.79335	6.53666	7.50839	6.61603	6.39008	6.96204	7.49727	6.6062	6.76463	6.29914	6.79211	6.35891	7.05822	6.78933	6.42059	7.12552	7.01189	6.60743	7.26456	6.36783	7.49012	7.4178	6.87054	6.66012	8.04358	6.80427	6.72599	7.10794	7.59962	7.21308	6.59588	7.12696	7.11299	6.85392	6.55376	8.14765	6.74023
ENSG00000002834.18_LASP1	11.1435	10.8772	11.0863	10.499	11.5685	10.2041	10.5805	10.5331	11.6649	10.6059	11.6625	10.8363	11.0039	10.5928	11.6452	10.6902	11.2954	10.7767	11.5153	11.1567	11.4783	10.6822	10.9103	10.3144	11.0757	8.84118	10.9713	10.5112	11.7507	10.7334	11.8771	10.3163	11.2192	10.3487	11.2661	10.2621	12.0624	10.7829	10.7754	10.5546	10.8775	10.24	11.2261	11.5148	10.883	10.6417	10.6832	10.5999
ENSG00000002919.15_SNX11	6.42178	6.84283	7.2828	6.82714	7.91416	6.59626	7.04872	7.28596	7.10985	6.57398	7.44955	6.4723	7.26749	6.54316	7.29334	7.04571	7.14352	6.65416	7.18821	6.92337	7.24911	6.4425	6.86013	6.4123	6.82093	7.06029	6.29246	6.78244	7.25111	6.5903	7.13967	6.91546	7.15228	6.09015	6.86435	5.84041	7.57993	6.64296	6.70033	7.19383	6.77504	6.17198	6.74359	7.41213	6.71688	6.35991	7.68808	6.86769
ENSG00000002933.9_TMEM176A	8.0687	8.93496	9.32247	8.58565	9.06192	6.42522	8.55537	8.6638	8.73978	9.26284	9.58361	7.54323	8.5702	8.09212	9.1719	7.7353	8.65581	9.55674	8.19902	8.10576	8.36526	7.90453	8.14029	9.07319	8.05584	6.52425	7.6624	6.86496	8.64438	8.1179	8.26866	4.57712	8.74899	9.33692	8.26202	6.05876	9.22997	8.72389	7.62064	9.39743	8.4071	8.31612	8.85355	8.88487	8.31536	8.74616	7.64434	7.98657
ENSG00000003056.8_M6PR	7.9632	8.02125	8.3304	7.64355	6.67958	7.32945	8.2267	7.41564	7.25951	8.63183	7.47694	7.01276	8.7436	8.28748	7.54021	7.45212	8.11573	8.64957	7.51321	7.52202	8.19372	8.95276	7.90829	8.90609	7.8708	8.19332	7.71432	8.34256	7.77919	8.35693	7.78436	7.81816	7.72129	9.26413	7.77605	7.39952	7.83598	8.31593	7.30924	7.92782	8.13599	8.47389	8.68529	7.8255	7.94699	8.68779	7.74183	8.45264
ENSG00000003096.14_KLHL13	4.09474	4.14058	4.64816	3.55212	5.50718	4.10894	5.23702	1.7056	4.89818	6.52323	4.92388	4.0086	4.85488	6.64713	3.7007	2.57495	5.53386	2.79966	4.35839	5.56197	4.60601	4.86244	5.57873	2.88488	4.72101	6.71908	4.32995	2.94153	4.07936	5.05195	3.60676	4.8029	4.23856	2.95053	5.12286	3.53173	3.53509	4.07032	3.98828	7.40329	4.73405	4.70728	4.07706	4.73805	3.85873	3.11201	4.00882	4.37031
ENSG00000003137.9_CYP26B1	3.92621	4.20985	2.8365	5.05367	5.34939	5.34487	4.34987	5.50994	4.73013	4.09959	4.89791	4.93029	4.5818	3.03787	3.08469	4.34852	4.95819	6.82303	4.12573	4.11413	3.3303	3.70327	5.08597	3.98344	3.70107	5.22467	3.7666	3.39062	4.39283	6.06402	4.30951	4.89293	4.34738	3.82574	4.58972	3.35089	4.11745	4.32962	4.35594	3.81032	3.49058	3.15475	3.61596	5.07903	4.10631	3.48206	5.27724	3.93505
ENSG00000003147.19_ICA1	6.90957	7.16845	7.25481	6.9981	6.21569	7.23005	7.46053	6.99227	7.07043	8.15001	5.66136	5.73714	7.39313	8.31827	6.85746	7.89701	6.45354	7.42134	6.86768	7.13205	6.97658	7.93602	6.3216	8.14411	6.26099	4.80416	6.80016	7.03767	7.52771	7.05413	7.37077	8.4146	6.88294	8.21617	6.72605	7.26163	6.76027	7.97931	7.24418	7.96242	6.92892	7.75851	7.54429	7.26006	7.17229	7.25859	6.88107	7.84783
ENSG00000003249.15_DBNDD1	3.90337	5.3824	3.81442	5.28201	3.35972	4.30977	3.67738	5.50033	3.74442	5.74271	5.91432	4.85916	3.62429	5.05896	4.50615	6.06161	2.9599	7.16396	3.60146	4.16935	3.70387	5.06534	4.25197	5.97446	3.19057	4.35818	2.62899	4.52338	4.64226	5.21502	4.12126	5.75264	3.55837	6.50536	3.78027	4.40174	3.73684	3.82804	4.16022	3.87302	3.63454	5.40455	5.00129	3.47644	3.88594	6.45829	4.04458	5.79751
ENSG00000003393.16_ALS2	6.75986	6.76334	6.44829	7.00898	6.70253	7.32117	6.86917	7.22235	6.67619	7.34508	6.8659	5.86919	6.71119	7.37096	6.54336	8.13648	6.82608	8.37422	6.00274	6.72558	6.32648	7.62348	7.06815	7.52427	6.85552	7.51005	6.82903	7.0444	6.30307	7.35948	6.27724	7.53179	6.80691	7.3953	6.44296	8.36511	6.26961	7.2226	6.73979	7.32091	6.63796	7.15032	7.16499	6.72149	6.84756	7.64179	6.48914	6.77347
ENSG00000003400.15_CASP10	8.88234	8.33769	8.79451	7.94145	10.194	8.21336	8.11013	8.65387	10.1922	8.3318	9.35739	8.39979	7.60095	7.85488	9.74607	7.78877	8.75114	7.78161	9.11743	8.72945	8.9252	8.83146	8.86616	8.08481	8.70541	5.48271	7.8678	7.33797	9.81023	8.39562	9.36526	6.85282	9.02493	7.69994	8.73066	8.13409	9.866	8.95336	8.52956	8.1884	8.50139	7.61993	8.9546	9.19888	9.36512	8.62907	8.38967	7.60446
ENSG00000003402.20_CFLAR	10.2753	10.0291	9.71406	11.0209	11.5997	11.1552	10.274	11.2366	11.1255	9.36082	12.5055	11.8396	9.71288	10.3235	10.7805	10.9338	10.4152	10.6114	10.7266	10.3733	10.316	10.3175	10.2036	9.85012	10.0521	10.4585	10.3333	9.93233	10.2681	10.2243	10.3588	10.1386	10.9628	9.54837	9.91997	10.8385	10.7172	10.2264	10.7487	10.2864	10.3218	9.9502	10.1319	10.8721	10.9934	10.5963	11.3157	9.69661
ENSG00000003436.16_TFPI	5.59504	4.15655	6.0054	3.67169	1.7056	5.35641	5.6282	4.48862	5.94225	7.00124	3.46822	1.7056	6.80042	5.6887	6.11854	6.67797	7.19838	8.01738	4.20859	6.29741	5.85159	4.80399	8.13116	5.37141	5.17052	7.45359	6.22638	4.14393	5.22217	7.65188	5.46989	6.5925	6.4774	5.82965	7.43796	5.07526	4.89159	7.77789	5.93777	3.76247	6.6727	5.33587	5.68806	5.04242	5.1768	8.02063	6.1279	4.98081
ENSG00000003509.16_NDUFAF7	5.32026	5.54391	5.5834	5.35364	5.9543	5.68444	5.57172	5.30348	4.69496	5.66511	3.89212	4.55781	5.11764	5.69963	4.94779	6.16358	4.98291	5.34325	5.06339	4.88419	4.69476	5.07572	5.44885	5.46032	5.54639	6.41879	5.59814	5.89169	4.95353	4.96895	5.0823	5.19294	5.12402	5.86825	5.48169	5.80866	5.3153	4.57514	5.58938	5.69276	5.45988	5.501	5.27149	5.56328	4.97076	5.73347	5.05015	5.22029
ENSG00000003756.17_RBM5	9.26372	8.79855	8.40444	9.27503	9.24212	9.47982	8.89695	9.27981	9.74476	8.17039	9.31052	9.30003	8.29318	8.70898	9.20524	7.88582	8.91199	8.39754	9.23316	8.98827	8.72693	8.13747	9.09954	8.64188	9.0399	9.09028	9.1803	8.64183	8.92429	8.7245	9.15036	9.21074	9.28804	8.41264	8.78943	8.94043	8.97042	8.7475	9.63512	8.96809	9.09264	9.00533	8.77699	9.25433	9.48235	8.86108	9.48677	8.47244
ENSG00000003987.14_MTMR7	5.23688	4.58324	4.45924	3.63551	1.7056	4.25635	4.30378	1.7056	3.89193	4.31121	3.77026	1.7056	4.27132	3.92022	4.29115	4.67587	4.13603	4.54085	3.41502	3.31788	4.44659	4.6043	4.45589	4.36401	4.19504	5.05657	4.84202	3.38004	4.41845	4.47498	4.33652	4.77293	3.92503	4.42119	4.34603	3.27913	4.54465	4.4438	5.08155	3.09004	4.14489	3.91222	4.64723	4.07428	5.32312	4.08652	3.18071	4.28756
ENSG00000003989.18_SLC7A2	5.6314	3.21605	5.2099	3.52089	1.7056	6.28186	6.49883	4.52736	5.5889	3.84699	6.69134	1.7056	5.77238	4.02232	6.01055	4.23809	6.96745	3.9283	3.41379	6.20357	5.40658	6.02384	6.49075	3.93405	6.0621	7.48316	7.39114	3.3803	4.07378	5.09598	4.16867	5.10086	5.50688	3.53715	6.90781	3.85009	4.22579	5.29872	5.70328	1.7056	6.27675	3.11119	3.68526	4.68517	5.6875	3.66514	4.39102	3.36512
ENSG00000004059.11_ARF5	8.86548	9.07133	9.34836	8.77177	8.85945	8.23781	9.4262	9.16162	8.43389	8.98319	9.52881	9.43463	9.35876	8.85214	8.74642	7.92841	8.68044	7.70236	8.70704	8.48381	9.15617	9.01355	8.29511	8.92938	8.50387	8.47121	8.36037	8.54956	8.88283	8.19109	8.8971	7.76333	8.41059	9.10449	8.54266	7.64835	9.0483	8.3798	8.01208	9.74071	8.42483	8.32383	8.44397	8.94334	8.25321	8.51089	8.15144	9.41517
ENSG00000004139.14_SARM1	6.84477	6.74897	5.6022	7.6879	7.21115	7.87606	6.79504	6.79842	6.24479	4.87026	7.43266	6.71127	6.6047	6.73762	6.18536	6.6395	6.54805	5.25702	6.31928	6.03196	6.52075	6.45207	7.05467	6.96752	6.49558	8.04137	5.69109	7.0044	6.75753	6.31031	6.75263	6.26131	6.77151	6.65377	6.38411	7.23155	5.83984	6.1052	6.71956	6.89133	6.70593	6.89264	6.06114	6.4409	6.53028	6.41189	6.28155	6.58684
ENSG00000004142.12_POLDIP2	8.57976	8.67688	9.1417	9.31203	8.90935	7.97627	8.78062	8.28701	8.05573	8.77682	8.60977	7.85631	9.19924	8.59326	8.54484	8.74704	8.41953	8.57475	8.81335	8.53346	9.08761	8.94057	8.3642	8.72491	8.65873	8.53123	8.57752	8.74042	8.37466	8.59186	8.5888	7.77812	8.61107	9.04161	8.86499	8.23883	9.12651	8.84489	7.96332	8.65922	8.36442	8.7526	8.76227	8.4092	8.34959	8.65817	7.95424	9.32313
ENSG00000004399.13_PLXND1	7.82676	6.4684	6.8296	7.70068	6.15161	10.1143	7.85053	9.56748	8.08992	7.2644	8.5293	8.38303	8.70167	7.90264	7.53473	9.88594	8.64571	8.72757	7.1806	8.46774	7.45334	7.8233	9.35524	8.22367	6.84053	9.05072	8.07874	7.52684	7.15689	9.36029	6.43174	9.4639	8.32271	7.7329	8.40033	9.37117	7.02032	7.52138	8.36406	7.04116	7.92764	7.93645	7.6343	7.26742	7.19874	8.76945	8.04275	7.24241
ENSG00000004455.17_AK2	9.51857	10.106	10.0776	10.5702	9.99507	9.76878	10.2786	10.016	8.98705	9.01206	11.6606	10.6731	10.4383	9.32565	9.63729	8.69557	9.50994	9.45709	9.55786	9.47372	9.73048	8.65959	8.54065	9.1333	9.22541	8.66121	9.51049	9.70107	9.58887	9.31234	9.72475	8.88124	10.0369	9.31771	9.68468	9.09389	9.80084	9.11647	8.838	10.2387	9.59418	8.9366	9.07858	9.91474	9.27445	9.24032	9.67369	9.72633
ENSG00000004468.13_CD38	4.70003	4.14333	4.33967	4.32779	1.7056	4.5537	4.64395	3.85898	2.79661	4.32971	4.81195	1.7056	3.61174	4.70943	4.47417	2.45704	6.6461	5.30931	5.42585	5.49967	3.96469	4.54222	4.74816	6.27335	5.46166	4.56874	4.6758	4.66125	5.76001	6.7127	4.28566	3.82979	6.24314	5.44536	5.81811	3.51897	5.4197	5.50669	5.30535	3.41592	5.8668	3.70385	5.32464	4.7384	6.75456	6.69304	6.65772	4.49483
ENSG00000004478.8_FKBP4	8.20409	8.78151	8.97599	9.25874	8.0422	8.60844	8.88487	8.23923	11.1477	9.82992	8.17161	8.69019	9.34428	8.59652	8.02936	7.79844	7.99953	9.4155	8.14816	8.28365	8.90241	9.2768	8.09994	8.91901	8.80068	7.90104	8.15793	9.10005	8.00221	9.10173	8.05132	8.01192	7.64144	9.19265	8.47067	8.42521	8.46739	8.14808	7.3855	8.01717	8.3344	8.61178	9.11456	8.59476	7.78935	9.22145	7.48676	8.53335
ENSG00000004487.17_KDM1A	7.75844	7.89548	8.38228	7.70728	6.85803	7.80235	8.08992	7.6041	6.67538	8.53683	6.84012	7.69425	8.27127	8.12682	7.38429	8.03447	7.45455	8.54123	7.0525	7.63655	7.87882	8.28645	7.76019	8.67411	8.04778	8.44246	8.10258	8.73054	6.94719	8.12892	7.31875	8.25026	7.00873	8.84927	7.95416	8.15648	7.12827	7.29755	7.4973	8.21703	7.71453	7.90792	8.05674	7.17259	7.82061	8.42849	7.31906	8.95438
ENSG00000004534.15_RBM6	8.30178	7.7684	7.82781	9.45508	7.3446	8.80498	7.86159	9.67282	9.30489	8.67408	8.49069	9.02238	7.66062	9.03603	8.64304	8.36615	8.56473	8.55588	8.63987	8.18463	7.54136	8.15891	8.73195	8.91424	8.28721	8.58974	8.70338	9.30514	8.23433	8.79316	8.57095	8.80674	8.54535	8.89017	8.28679	9.86304	8.49331	8.2503	9.32681	9.48683	9.05882	8.85382	9.03774	9.14165	8.73957	7.99364	9.56154	8.79386
ENSG00000004660.15_CAMKK1	5.69631	6.07963	5.10722	7.29015	5.4586	7.85376	5.75587	7.09214	5.19455	6.18834	4.78464	6.57877	6.11316	6.4706	5.05242	6.10407	6.46066	6.61993	5.2793	5.02143	5.62497	6.22625	5.85225	7.32397	5.2816	5.9565	6.05546	7.23973	5.10039	6.27816	5.04309	7.67959	6.01198	7.27939	5.4246	8.72675	4.93756	6.00132	6.68172	6.66696	5.60134	6.01667	4.08134	4.74017	6.00226	5.54817	6.449	7.19376
ENSG00000004700.16_RECQL	5.66007	5.79755	6.24036	4.44048	1.7056	5.19281	6.28331	4.66665	5.75092	6.87744	4.29075	5.3927	6.75418	5.91511	5.95421	8.04801	6.76296	7.07578	5.72689	6.32659	6.04046	7.04901	6.50224	7.09858	6.3268	7.54351	6.29177	6.68739	6.17914	7.31762	6.13774	6.3073	7.00026	7.60878	6.40129	5.46456	5.58406	6.32327	5.81172	5.58024	6.33219	6.8945	6.49933	5.32535	6.49658	6.52443	6.46616	6.57967
ENSG00000004766.17_VPS50	7.20697	7.36718	7.60925	6.20052	4.55357	5.95224	7.33941	5.3342	7.23916	6.80394	5.4274	7.14186	6.98876	7.28621	7.78271	6.25901	7.08501	6.76924	6.90871	6.9537	7.09203	7.0952	6.95266	7.30924	7.51216	7.44657	7.61109	6.97547	7.39247	6.85747	7.28741	7.09462	7.20685	7.26782	7.01575	6.64907	7.4099	6.99155	7.03951	7.26053	7.01752	7.07626	7.09553	6.96857	7.11863	7.15958	6.67666	7.48715
ENSG00000004776.13_HSPB6	4.67562	5.32278	4.26404	5.32635	6.19718	6.76897	5.74185	3.76993	4.94485	3.47565	7.74231	5.06963	6.53373	4.22773	5.05048	3.9351	6.32861	2.76998	4.42635	5.74684	5.16677	3.6955	8.45988	4.91037	4.12445	10.5182	5.5826	3.54124	4.49631	3.6267	4.26227	3.83464	5.20801	5.78166	6.68703	3.43419	3.7375	3.57925	5.21967	5.37525	5.64675	1.7056	3.18043	4.60678	4.08375	1.7056	5.76294	2.59701
ENSG00000004777.18_ARHGAP33	7.03237	6.81051	5.51067	7.27252	7.64948	7.57905	7.24921	7.64832	6.331	5.46589	7.20862	7.52834	6.49309	6.53672	6.89964	6.86308	7.05856	6.1977	6.53964	6.20944	6.45969	6.79384	6.5017	6.3067	6.7403	6.42871	7.3556	7.77578	5.35342	6.72783	6.93415	8.02926	7.19685	6.04734	6.36305	6.37924	6.21057	6.85922	8.02908	8.32169	7.20222	7.21131	5.38287	6.55961	7.59123	5.89714	7.75978	6.31123
ENSG00000004779.10_NDUFAB1	7.11133	6.84885	7.94628	6.55027	4.66004	5.94807	7.57268	5.68015	6.08734	7.43284	6.34539	7.27456	7.73784	6.60313	6.93529	6.58975	7.01004	6.97674	6.65255	6.71185	7.4349	7.17285	6.87002	6.37326	7.22471	7.17383	7.07286	6.65087	7.09073	6.83092	6.82471	6.32966	6.73771	6.91447	7.37669	5.54771	7.4086	6.81299	6.63494	6.88039	6.8754	6.76256	6.96533	6.56778	6.78569	6.7312	5.81503	7.02317
ENSG00000004799.8_PDK4	8.5952	8.63855	9.96021	6.09937	6.38409	7.08672	9.03148	6.9688	10.0689	6.31386	8.57841	8.27626	10.1592	9.20588	11.6153	7.82735	11.2315	7.99409	8.68322	10.1218	9.04633	6.65708	10.8856	7.60611	9.02891	12.5023	9.95609	5.70598	8.7819	8.05108	10.3212	6.19079	10.8643	6.96812	10.4899	5.73454	9.30411	8.79807	7.79579	5.78229	10.2839	5.9627	9.07409	9.59472	9.58338	6.48244	10.5931	6.6785
ENSG00000004864.14_SLC25A13	7.97914	8.14472	8.42981	7.75905	7.14521	6.90344	8.01705	7.60417	7.78477	8.4266	7.93496	7.0776	8.31461	8.44389	8.48046	7.29009	8.06431	6.92742	8.12747	7.9594	8.41014	8.76648	7.32903	7.94423	8.12488	6.10874	8.21611	7.65872	7.91575	7.4613	8.37057	7.28292	7.83025	8.21966	8.32684	7.69776	8.69865	8.29939	7.84938	8.1639	7.76022	7.89303	8.15762	7.95145	7.93389	6.84165	7.37265	8.21852
ENSG00000004866.22_ST7	5.36125	5.54279	5.79691	5.04267	1.7056	5.54535	5.79087	4.45174	5.53009	6.47787	3.19413	3.56228	5.63402	6.11988	5.39945	5.80167	5.76284	6.13388	4.44775	5.80067	5.58828	6.66477	6.1041	6.09474	5.67973	6.42256	5.19679	5.7309	4.95422	6.03992	4.93309	6.32294	5.26396	6.6943	5.34372	5.83023	5.57938	6.47367	5.43706	5.64655	5.67731	6.21281	5.77354	4.62439	5.68922	6.63824	5.15833	6.05542
ENSG00000004897.12_CDC27	7.96289	7.43649	7.93714	6.11078	4.89555	6.98303	7.65664	6.91923	7.5519	8.65968	3.5024	4.64577	7.90251	7.76665	7.87601	8.68104	8.18161	8.71193	6.89271	7.90639	8.01397	8.49675	8.01925	8.12284	7.84692	8.34905	8.20436	7.61252	7.65186	8.59028	7.3603	8.43392	7.31965	8.40312	8.33622	7.11108	8.01969	7.69708	7.77974	5.94954	7.61886	8.25918	8.1017	7.43133	8.23973	8.75647	7.36989	8.14131
ENSG00000004961.15_HCCS	6.41575	6.41469	7.1827	6.08502	6.68815	5.65102	5.60269	5.20813	6.94681	6.60921	6.13421	5.77952	6.82639	6.01536	7.04395	5.64514	6.70391	6.45239	5.89735	6.80471	6.59041	6.81103	6.40349	6.2649	6.51087	6.17253	6.50158	6.21005	7.44949	6.62546	7.20774	5.54218	6.80717	6.81898	7.07927	5.23034	7.31932	6.39973	6.31514	6.46614	6.7847	6.19965	6.78498	6.12311	6.76779	5.91868	6.43321	6.35366
ENSG00000004975.12_DVL2	7.31054	6.86523	6.54634	6.61111	6.98453	7.11327	6.73846	6.87743	6.6687	7.19798	7.18145	7.76509	6.71616	6.32341	7.15102	7.20956	6.85298	7.48693	7.00958	7.2278	6.82855	6.43071	7.39033	6.99218	7.04776	7.59346	7.23541	7.66371	6.77447	7.07945	6.69478	7.30542	6.71723	7.16299	7.1384	7.91448	6.31112	6.39426	6.94061	7.43244	6.97485	6.59676	6.44797	6.41708	7.09141	7.329	7.85659	6.7736
ENSG00000005001.10_PRSS22	3.03233	3.80889	2.7785	6.98174	1.7056	6.49979	6.68674	7.84194	4.98098	6.59692	1.7056	6.55654	3.45021	6.95654	4.05206	5.88942	2.94022	5.9392	3.02757	3.6025	3.99416	7.40194	2.99395	5.56104	2.65496	1.7056	2.45458	4.23045	3.3364	4.94678	3.15295	6.41683	3.54123	5.68785	2.61909	6.29001	2.82853	5.18455	5.41107	6.78995	2.98014	5.004	6.76604	5.72386	3.35302	7.67421	3.35924	6.03253
ENSG00000005007.13_UPF1	9.83379	10.1153	9.70712	10.1989	10.3224	10.1464	10.1479	10.3944	10.1719	10.0303	10.6427	10.6951	10.222	10.0816	10.0346	9.86748	9.67685	9.63391	10.2183	9.89948	10.0999	9.46666	9.72792	10.1838	9.78915	9.952	9.66984	10.0745	9.98514	9.74554	10.1722	10.0892	9.83534	10.1156	9.83122	10.4944	9.95766	9.52812	9.99691	10.3247	9.84361	9.79579	9.76398	10.1576	9.75597	9.8134	9.91334	9.86006
ENSG00000005020.13_SKAP2	7.92397	7.87659	8.61134	6.05713	6.00485	5.78933	7.57771	6.9011	7.91949	7.82806	6.97102	5.56932	7.85525	7.85208	8.04799	7.0947	7.99212	6.75632	7.62991	8.52905	8.18673	6.76978	7.845	7.16068	8.04643	7.32075	8.32146	6.65383	8.0216	7.97749	8.33438	7.12691	7.92496	7.29566	8.40678	6.11739	8.31676	7.45976	7.7572	7.67235	8.37837	7.46319	7.78698	7.73403	8.05052	6.93458	7.91759	6.59555
ENSG00000005022.6_SLC25A5	11.3622	11.4582	12.107	9.88807	9.03193	9.18243	11.4504	10.1316	11.3239	11.3633	11.3349	10.618	11.6296	10.615	12.407	10.0433	11.4262	10.367	11.4159	11.2153	11.8445	10.8807	10.7285	11.1494	11.5454	9.47099	11.6448	10.3081	11.9897	10.746	12.2096	9.82095	11.8354	11.4891	11.8074	8.69985	12.4283	10.9442	11.0718	10.1374	11.381	10.5027	11.4757	11.5267	11.436	10.5681	10.7166	11.0815
ENSG00000005059.16_MCUB	5.52742	4.72395	5.50929	5.09356	4.23124	5.74082	5.01391	4.35168	4.05585	4.73748	1.7056	1.7056	5.2482	5.06938	5.13855	4.4179	5.97865	7.41566	4.72668	5.62584	5.4071	5.02502	5.76642	6.0164	5.6728	4.74519	5.95696	5.55825	4.31746	6.30026	4.77054	5.45608	5.63335	6.21285	5.59113	5.20935	5.00734	4.85858	5.14661	5.29825	5.22135	5.4941	4.8466	4.31975	6.17865	6.38796	5.85665	4.93046
ENSG00000005073.6_HOXA11	6.06274	6.13892	5.34428	6.52998	9.39675	5.82615	6.62768	6.82456	5.22937	5.21157	7.93185	8.40824	5.88062	5.07013	5.98833	7.0644	2.6083	6.1141	6.44046	5.50145	6.09183	6.1408	6.37751	6.67149	5.56009	7.57203	6.19445	6.72273	6.14677	5.16302	5.792	4.69197	6.33415	6.43902	5.45785	4.01093	5.66021	6.25031	5.95908	9.35559	6.31308	6.43535	5.17056	4.45252	5.96729	4.57521	5.32527	3.5952
ENSG00000005075.15_POLR2J	6.16085	7.04349	6.62182	5.73881	6.00198	5.57588	6.45905	6.09031	6.17542	7.33904	5.07253	5.39009	6.33664	6.80031	6.67557	5.94075	6.4424	5.94171	6.168	6.48187	6.12602	6.81928	6.37724	6.49984	6.29801	5.85378	6.40659	6.2	6.92324	6.37926	6.64292	6.16121	6.21664	6.28799	6.03516	6.16361	6.59733	6.74928	6.31176	6.74129	6.52842	6.26706	6.76045	6.41879	5.69804	6.0582	5.48509	6.66414
ENSG00000005100.13_DHX33	6.80008	6.7189	6.95175	7.95244	8.71106	7.41282	7.48598	7.25255	7.00667	7.39653	6.34912	7.48941	7.57911	7.01504	6.52317	7.82673	6.82115	7.68392	6.43516	6.411	6.83939	6.70045	6.84852	7.83923	7.30668	6.99261	7.00511	7.998	6.39593	7.36413	6.84516	7.75722	6.45206	7.98429	6.77692	8.15152	6.57994	6.39997	7.41628	7.57641	6.79629	7.09985	6.77747	6.44224	7.0876	7.23128	6.74019	7.52581
ENSG00000005108.16_THSD7A	4.96746	4.44303	4.56621	4.60211	1.7056	6.66082	5.37515	4.73153	5.44422	4.12816	3.07082	5.22407	5.40682	4.82634	5.19926	3.45987	6.2074	3.64331	3.40575	5.69371	4.45535	3.71216	6.75702	4.41372	4.17355	7.18253	5.85619	2.9302	3.29233	4.82458	3.9201	5.10473	5.0672	4.06352	4.85705	4.01465	3.90269	4.25996	5.21253	2.9515	4.46433	4.27078	3.41361	3.72496	5.07353	4.36299	3.88255	4.58141
ENSG00000005156.12_LIG3	7.769	7.84286	8.13387	8.3051	6.50847	6.83104	7.62233	7.44974	8.05341	8.50725	5.68755	6.55042	8.17593	8.25608	7.44195	8.48571	7.64049	8.08338	6.99544	7.04468	7.83674	8.47887	7.25264	7.99021	7.64267	8.10436	7.45941	8.022	6.5963	7.73668	7.36513	8.19378	6.9297	8.24612	7.59429	8.05578	7.55743	7.3582	8.09814	7.826	7.2546	8.17973	7.75998	7.04275	7.74617	7.54213	7.03139	8.4539
ENSG00000005175.10_RPAP3	6.3317	6.11945	6.87267	5.05717	1.7056	5.43631	5.72193	4.19363	5.67254	6.96934	1.7056	3.16956	6.58355	6.76978	6.16384	6.83267	5.73284	7.31307	6.29022	6.9677	6.13442	6.46284	6.41634	7.46005	6.48588	7.71896	6.37056	6.77284	5.95668	6.9264	5.9738	6.6493	6.37087	7.64938	6.41592	6.59224	5.97334	6.0593	6.14102	5.73082	6.27851	7.12598	6.51595	5.89757	6.63235	6.87322	6.23484	6.81907
ENSG00000005187.12_ACSM3	6.80551	6.68385	7.48425	4.89033	3.50095	3.66951	7.52076	6.54605	5.69361	5.80132	5.31493	5.24023	6.70408	5.88113	6.43841	4.76413	4.83587	7.38578	5.10585	6.54431	6.81911	6.46333	5.94295	6.09374	6.14345	3.29989	6.87893	7.13522	6.3011	5.20317	6.47832	4.00926	6.39166	6.13241	6.74096	4.82133	7.51742	6.18584	6.29843	5.96471	6.86841	6.93981	4.66651	6.22316	7.15684	7.05447	4.89027	5.96957
ENSG00000005189.20_REXO5	4.73465	4.52453	4.57769	4.98515	1.7056	4.9485	5.33412	4.36953	3.07809	4.75675	4.98113	4.02455	4.82084	4.49635	4.43377	5.41215	4.35368	5.31311	4.7597	3.62291	4.94388	5.70219	4.42579	5.12189	4.38933	3.81983	4.82406	4.12344	4.10906	4.37641	3.6493	5.05879	3.83514	5.63057	4.28824	4.54239	4.23049	4.5244	4.53751	5.60745	3.87098	5.01682	4.11956	3.4654	4.99228	5.62857	5.31348	4.27068
ENSG00000005194.15_CIAPIN1	6.92204	7.33214	7.52066	6.7932	6.22545	6.92414	7.57819	6.91927	6.59392	7.52322	7.79081	7.07368	8.16702	6.62041	6.49792	6.86913	6.89015	7.4542	7.20698	7.07541	7.53266	7.47764	6.68521	7.03173	7.07578	6.84094	7.25653	7.20925	6.70935	7.1054	7.0076	6.8544	6.86246	7.235	7.08076	6.54869	7.06745	7.37892	6.9944	7.22565	6.4296	7.18554	7.56566	6.85673	6.88483	7.29369	6.41757	7.68411
ENSG00000005206.17_SPPL2B	10.0423	10.2391	9.31857	10.6182	11.8059	10.9635	10.1927	10.9638	10.4713	9.31003	11.8062	11.67	9.71387	9.90048	10.3824	11.5599	10.2398	8.83922	10.4421	9.89746	9.54963	9.2433	9.7069	9.25727	9.65594	8.61154	10.1537	10.4907	10.148	9.18	10.4549	10.3997	10.7395	8.83193	9.81569	10.6315	9.88615	9.76978	10.2945	10.6277	10.3985	10.0944	10.0994	10.4981	10.0249	8.91286	11.1176	9.67889
ENSG00000005238.20_FAM214B	7.62382	7.22426	7.25759	6.13114	6.95533	7.65092	6.81223	8.01262	8.5621	6.82795	6.61041	7.84768	7.77891	7.44833	8.0151	6.38462	8.22037	6.82459	7.91316	7.54676	8.09435	7.32116	7.28226	6.19261	6.98822	7.05519	7.35706	6.38672	7.91193	7.67035	7.79812	6.43005	7.33305	5.90802	7.4583	6.30389	9.14028	7.60054	8.3781	6.63191	7.3554	6.3664	7.51535	8.11941	7.37802	6.78218	7.74805	6.63624
ENSG00000005249.13_PRKAR2B	5.76885	5.37441	5.98479	4.91898	7.14395	5.74701	6.4796	6.00746	5.30358	4.9337	5.8968	6.38518	7.32011	5.63032	6.13506	2.75655	7.60876	3.94369	5.28025	6.72648	7.05538	4.31896	7.1333	4.36447	6.42318	8.19283	5.7447	4.50717	5.26549	6.18798	5.41413	4.10194	6.68675	3.61919	7.25481	4.36959	6.25713	5.7148	5.93832	4.42029	6.85215	5.28249	5.12696	5.53772	6.46862	5.12647	7.30346	4.29239
ENSG00000005302.19_MSL3	6.63797	6.2772	6.59114	6.31972	1.7056	7.26554	6.08775	6.67524	5.86287	6.7893	5.52657	6.11272	6.11824	6.87521	6.51702	6.64073	6.28047	7.13146	6.48195	6.79643	6.44215	6.8398	6.47185	7.21993	6.65988	6.83753	6.62986	6.23212	6.7387	7.07141	6.85535	7.29295	7.14412	7.08951	6.43521	6.83528	6.61265	6.97896	6.39792	6.74927	6.90653	6.51643	6.75098	6.59708	6.96731	7.01178	7.09955	6.79579
ENSG00000005339.15_CREBBP	9.57145	9.4738	9.22226	9.45962	9.34509	9.88012	8.9956	9.61037	10.3154	9.56344	9.61892	9.56807	8.9796	9.50137	9.75218	9.54858	9.5891	9.54794	9.44517	9.67722	9.30241	10.5085	9.93857	9.41281	9.36844	10.1422	9.50477	9.44202	9.86509	9.35136	9.89875	9.73211	9.77358	9.34948	9.51872	10.2787	9.60268	10.3242	9.92289	9.55952	9.62323	9.64901	9.88314	9.56919	9.52229	9.56442	10.1287	9.35341
ENSG00000005379.17_TSPOAP1	6.02226	6.23271	5.11474	7.57984	6.01055	8.76781	6.80935	9.13674	7.08026	3.59933	5.83268	6.38574	5.39924	6.38841	6.16597	7.86734	6.65691	6.13284	5.70046	5.55342	5.65202	8.25211	6.96348	5.63874	5.74419	8.5327	6.13061	5.93244	6.6029	6.35335	5.91041	6.19152	7.42725	4.80979	6.07498	7.75032	5.29519	7.93317	7.18678	6.46533	6.77868	7.41665	5.87685	6.21214	7.50904	6.12807	7.26645	9.54248
ENSG00000005436.14_GCFC2	6.19556	6.22808	6.23154	5.41344	4.61636	5.97672	5.98721	7.43054	6.06423	6.48592	6.63561	7.11154	6.35084	6.96294	5.52918	7.17035	5.97724	6.66855	6.24387	6.01405	5.9705	6.36562	6.76517	6.45505	5.96696	7.05396	6.38081	6.76005	6.3657	6.2753	5.96882	6.47482	6.02239	6.84055	6.52856	6.70465	5.74722	6.72609	5.73826	5.74696	6.01135	6.91025	6.06042	5.21115	6.31358	6.57917	6.66622	6.65718
ENSG00000005448.17_WDR54	4.26915	3.80587	3.73654	4.02214	1.7056	4.38855	3.33275	4.29662	3.34633	4.76466	4.22638	1.7056	3.77064	3.89727	3.97509	3.43667	4.21834	4.15988	3.47678	3.42369	3.52807	4.16222	3.74165	3.8816	3.02612	4.26464	3.57649	3.94652	3.63609	4.50918	2.70613	4.94062	3.35678	4.28739	3.63643	4.09999	3.30541	3.84904	3.87456	3.94951	4.04644	4.97597	4.44452	3.56906	4.27863	3.89606	3.6428	4.0749
ENSG00000005469.12_CROT	6.69667	7.04555	7.33407	5.57848	7.67321	5.49685	6.07826	5.74555	6.30685	5.74188	7.58124	7.50987	7.34709	7.59922	6.32693	4.3146	7.40913	3.84881	7.31124	7.38234	6.59241	5.9796	6.65671	6.65623	6.75198	6.73418	7.5763	5.36567	8.15248	6.4318	8.32503	4.95324	7.15022	6.31349	7.80195	6.26241	7.99213	6.95927	6.42695	5.9583	7.72311	7.14783	7.01755	7.8638	6.66265	5.50572	6.422	6.52708
ENSG00000005483.21_KMT2E	9.41868	9.21717	9.29141	9.36685	9.49726	9.1256	8.90583	9.13467	9.82644	9.42224	10.0366	10.5183	8.96198	9.57772	9.58197	8.53101	9.60023	8.85022	9.62948	9.69858	9.00986	9.83095	9.52936	8.72856	9.28343	9.30376	9.58513	8.70645	10.0221	8.72364	9.87412	8.3655	9.69358	8.92217	9.52554	9.08418	9.9959	9.59712	9.44222	10.0161	9.53162	9.39678	9.39047	9.49317	9.49648	8.87079	10.0926	9.21942
ENSG00000005486.17_RHBDD2	7.369	7.4746	7.62037	7.66222	8.50573	7.63418	7.68065	7.62307	7.88732	7.61819	8.08504	7.79113	7.56949	7.81066	7.75777	6.61299	7.64963	7.36361	7.71766	7.23833	7.67069	7.73841	7.33287	7.45899	7.31718	7.11495	7.32629	7.04407	8.09595	7.85577	8.06197	7.68479	7.64029	7.70624	7.58894	6.69154	8.21479	7.82891	7.33946	7.00686	7.47975	7.3398	7.6927	7.98062	7.30092	7.26233	6.92008	7.68519
ENSG00000005513.10_SOX8	3.20046	2.40519	4.50783	3.7828	1.7056	3.93455	4.15129	3.50796	6.20607	2.5965	5.896	4.99415	3.46412	2.51498	2.43532	7.18644	3.22389	6.55226	5.03054	3.63089	3.1722	8.36484	5.82041	4.94103	4.59965	5.12216	3.81984	1.7056	3.42776	3.61209	3.8314	3.18802	4.09117	5.08626	4.09192	4.81421	4.30077	6.88167	4.61002	3.74481	4.16559	2.35272	3.55819	4.17538	4.97365	4.12109	5.76637	3.28194
ENSG00000005700.15_IBTK	8.41941	8.27804	9.06366	7.63454	6.3452	7.79562	9.01102	8.15417	9.32531	9.13946	8.12545	6.73617	9.25647	8.60145	8.70951	8.65175	8.86778	9.4724	8.34783	8.3644	9.45162	8.85418	8.46277	8.57309	8.84593	8.22072	8.82867	8.56125	8.47757	8.97943	8.72048	9.76737	8.50492	8.75615	8.85693	7.67423	9.34815	8.70467	8.97115	7.63592	8.40606	8.9108	8.37261	8.6233	8.72326	9.47987	7.79937	8.73598
ENSG00000005801.18_ZNF195	6.3313	6.45186	6.31328	8.13413	5.53657	7.48383	7.0285	7.15487	7.1594	6.92951	7.16604	7.48241	6.21686	6.59071	7.06348	8.28637	5.59966	7.43801	7.20686	6.16588	6.64121	7.16062	5.84778	7.28036	6.56451	5.00294	6.33521	7.11936	5.99931	6.56093	6.42384	7.95923	5.84677	6.85742	6.41998	8.12929	6.7355	7.67053	7.53959	6.62181	5.99412	6.75093	6.77227	7.30632	6.81242	7.16549	6.40126	6.87486
ENSG00000005810.19_MYCBP2	9.15084	9.63149	8.74648	10.3425	7.74067	10.2776	9.12309	9.19556	8.83497	9.19775	8.38557	8.90408	8.98073	9.52654	8.77855	9.89153	9.36672	10.2227	9.02961	8.98889	8.93882	9.65148	9.689	10.1615	9.17387	10.2423	9.22245	9.43065	8.43743	9.84923	8.54274	9.46963	9.45829	10.1346	9.14698	10.2603	8.84954	9.80535	9.35318	9.3479	9.24068	9.4101	10.1106	9.17599	9.63567	9.91165	10.13	9.89769
ENSG00000005812.11_FBXL3	8.44816	8.69673	8.90078	7.27506	7.81365	7.74733	8.14699	7.42305	8.60992	8.16792	8.60173	7.2333	8.22367	8.37141	9.00916	7.9537	8.79646	7.69952	8.78665	8.53455	8.44437	7.78776	8.83189	7.95752	8.75867	8.89621	8.82811	7.49826	9.39385	7.8242	9.40345	7.70305	8.99234	8.13668	8.97908	7.66492	9.26011	8.45734	8.42918	8.49756	8.99157	7.52771	8.73524	8.89541	8.6939	8.14034	8.38553	8.65866
ENSG00000005844.19_ITGAL	6.47821	5.53645	6.60945	5.9955	5.77597	7.92475	6.45189	6.34096	5.72683	4.67467	5.88036	5.65872	5.4346	5.65846	6.1452	5.54792	7.1361	7.09462	6.17751	5.89321	6.17629	5.68621	5.86558	6.90565	7.05688	5.66527	6.82946	5.44707	7.57996	8.21201	6.50439	5.17118	7.63092	6.36702	6.32022	6.10855	6.33639	6.4764	7.2245	5.26802	7.35499	5.44903	6.87863	7.22582	8.18018	7.21016	8.44863	5.24023
ENSG00000005882.12_PDK2	8.21616	8.14604	8.19068	6.50036	7.52656	6.4332	6.95717	6.34255	6.99537	6.54509	6.91963	7.64548	7.02166	7.51262	8.23896	6.38616	7.40513	7.57418	7.68888	8.11812	7.29727	7.08027	8.17027	7.56164	7.49569	8.65978	7.69224	6.83143	9.01366	6.83334	8.60092	8.17157	8.38301	7.5128	7.97972	7.97435	7.5181	7.39159	7.28351	7.76625	8.07696	6.89572	7.32541	7.87141	7.01618	6.65568	8.36415	7.12447
ENSG00000005884.18_ITGA3	10.3042	10.462	10.2691	10.4811	11.7098	11.2665	10.4987	11.1959	10.5095	9.08696	11.2508	10.8467	9.7831	9.96023	10.3644	9.33901	10.2853	10.5626	10.7485	10.3512	10.2135	9.536	10.0361	10.1796	9.90435	9.03011	9.81517	9.11721	10.6595	9.64917	10.7124	8.49583	10.3539	10.1368	10.102	10.0121	10.9239	9.84074	10.0323	9.81256	10.145	9.45141	9.92102	10.6705	9.89461	9.28168	10.5914	9.80919
ENSG00000005889.16_ZFX	7.68453	7.21438	8.41881	8.23149	6.32288	8.08858	7.82004	7.82228	7.85144	7.68163	6.68496	6.92333	7.78023	7.28578	7.76298	8.25634	8.37482	8.32558	8.10355	7.3847	7.83416	8.009	9.09662	8.41183	7.76955	9.39237	8.05789	7.65624	8.75184	8.07738	8.32581	8.25311	8.34617	8.18543	7.77908	8.41408	7.661	8.07904	8.00044	8.14678	7.80396	7.65862	7.76925	7.90599	7.95222	8.22077	7.24108	7.87665
ENSG00000005893.16_LAMP2	8.1687	8.44597	8.92355	7.62584	5.86557	7.46822	7.97805	7.00273	8.842	9.48879	4.8377	6.01028	8.14387	9.17136	8.89916	8.80337	9.01804	9.21921	7.89466	8.284	8.1876	9.74773	8.80296	9.48846	8.54593	8.95191	8.36935	7.90997	9.35737	8.57191	8.64079	8.28136	8.68306	9.78804	8.63863	7.81697	8.89553	9.12817	8.04569	8.43978	8.69199	8.96406	9.19819	8.07992	8.27373	8.58306	7.81581	8.89158
ENSG00000006007.12_GDE1	9.08902	9.06153	9.75202	7.38045	8.00518	7.3161	8.92708	7.7069	9.16344	8.5106	7.81698	7.98208	8.9433	8.69803	9.23663	7.30645	9.05061	7.8059	9.072	9.03055	9.23507	8.69231	8.62866	7.91854	8.8779	9.19473	8.49983	8.2247	9.69507	8.00669	9.73129	7.52389	9.03366	8.12307	9.06539	7.31189	9.42868	8.60919	8.99175	8.37709	8.83335	8.44129	9.26295	9.1385	8.81733	9.74633	8.33789	8.53789
ENSG00000006015.18_REX1BD	6.36712	7.16643	6.72241	8.36409	8.15227	7.63574	7.50508	7.78432	6.11558	6.86015	7.83552	8.94157	7.23827	6.82237	6.17862	6.50238	6.53875	6.66176	6.88148	6.79181	6.28018	6.191	6.44236	7.09673	6.04426	6.74004	6.49078	6.91782	6.25207	6.73965	5.84851	6.32329	6.66814	6.84775	6.4983	6.8237	6.05636	6.23001	6.2692	7.82171	6.48172	6.58378	6.15858	6.79605	6.14073	6.72591	6.55077	6.67956
ENSG00000006025.12_OSBPL7	9.2824	8.64028	8.29471	8.56323	9.13962	8.54367	8.63146	9.49594	9.26853	6.93526	8.80965	9.09406	8.73573	8.35533	9.45882	8.08385	8.98392	6.3145	9.80906	9.30947	8.88449	8.19764	8.55341	7.56127	8.65738	5.97083	9.18715	7.44278	9.01548	7.63373	9.32886	7.85311	9.37389	7.30908	8.91628	8.35789	9.42592	8.49891	9.51541	8.15473	9.53356	8.62207	8.99588	9.55196	9.01248	6.59635	9.37238	8.17103
ENSG00000006042.12_TMEM98	8.14501	8.33213	9.06757	7.26324	7.04284	6.03961	8.62041	6.61178	7.56062	7.34346	7.97061	6.46901	8.56706	7.91688	8.12331	7.09167	7.5667	6.88549	8.1349	7.83967	8.32301	7.8196	8.24053	7.55009	8.07826	6.24786	7.64876	6.7423	8.00851	7.30292	8.27991	7.22939	7.41376	7.67855	8.01185	5.2238	8.8311	8.3545	7.28285	8.00706	7.873	7.22248	7.79202	8.14644	7.12896	6.98318	7.27129	8.00616
ENSG00000006047.13_YBX2	8.41294	7.81221	6.94406	7.46863	7.26309	7.00542	5.77471	7.19962	8.0776	5.64421	8.61914	7.52613	7.03077	6.30237	7.91478	7.2007	6.27697	6.07574	7.60385	7.34684	7.02812	5.92734	7.0872	6.83998	8.03863	4.40826	7.49696	7.15889	7.129	6.33255	7.50635	6.69242	7.7931	6.86326	7.10925	4.65103	6.89454	6.32651	7.30862	8.20352	6.92868	6.48449	6.85341	7.8436	7.68615	4.60873	9.63234	5.98833
ENSG00000006062.18_MAP3K14	7.38729	7.34954	6.86183	8.37565	8.62969	7.44302	6.93318	7.8353	9.01626	6.73222	8.18947	8.18132	6.86199	7.06276	7.43762	7.42737	7.24615	7.27012	7.92318	7.35951	6.63288	6.97436	7.41795	6.75064	7.55826	7.81304	6.95386	7.27592	7.34184	7.10445	7.29999	7.77391	7.63748	6.1836	6.95908	6.62376	6.85495	7.16816	8.11212	7.5591	7.22112	6.9306	7.14657	7.44162	7.63598	6.37351	8.51602	7.28558
ENSG00000006118.15_TMEM132A	5.72338	5.45429	5.07631	7.42001	5.48933	7.55747	6.15403	8.52895	5.30595	7.8448	5.7383	8.19732	5.40233	6.64992	5.09755	7.53102	4.69229	7.87839	4.00127	4.98994	5.42512	6.4544	6.00676	7.23303	5.60457	5.71613	4.8306	7.26933	3.85961	7.35862	4.81359	7.35309	4.54508	6.7906	4.67923	7.60168	4.11816	4.48876	5.45423	6.78678	5.73632	7.24225	6.28992	5.56204	5.5026	6.68017	5.90492	7.27285
ENSG00000006125.18_AP2B1	10.3763	10.0841	10.8848	10.3349	9.68053	9.70452	11.1079	9.90834	10.1717	10.8353	9.90833	9.64401	11.2765	10.4856	9.9132	11.1385	10.2207	11.0708	9.93123	10.3865	11.0417	10.8668	10.2734	10.4455	10.6965	9.93334	10.5653	10.7261	9.85408	10.0472	9.96109	9.86498	9.72937	10.7759	10.4704	9.67304	10.7924	9.89779	10.6137	9.50658	9.98713	10.9393	9.73927	9.65027	10.2453	11.4373	9.68766	10.9084
ENSG00000006194.10_ZNF263	6.66829	7.20142	6.58694	8.47733	9.4702	7.68325	7.42511	8.05827	6.71511	6.97398	7.96665	8.17944	7.05466	6.97766	6.22451	7.4372	6.54605	7.01103	6.46219	6.60794	6.67343	8.28881	6.55972	7.30034	6.80035	6.79897	6.8394	7.03874	6.1917	6.69049	6.3897	7.16281	6.82655	7.37685	6.5601	7.36032	6.18779	7.9468	6.77682	8.17835	6.6163	7.17886	7.53669	6.63359	6.92971	7.21373	6.62954	7.52004
ENSG00000006210.7_CX3CL1	4.79796	3.58415	4.88984	6.38786	3.48183	5.91417	5.47714	5.38659	5.92866	6.02042	5.10009	4.0943	5.93051	4.70313	4.45287	5.53278	5.69538	7.50613	5.3223	6.18938	4.46963	6.33172	6.36976	8.32269	6.1859	7.73787	6.14149	6.03185	4.21959	6.08988	4.61501	4.60697	5.34826	8.16766	5.10843	6.15323	4.75764	5.39468	5.39533	6.53328	4.94626	5.93472	5.55256	4.72609	6.12519	8.30806	4.03148	4.22116
ENSG00000006282.21_SPATA20	9.01005	8.83972	8.5196	8.72232	9.4835	8.89861	8.98803	9.81225	9.10741	8.22714	9.29401	9.36188	8.76924	9.10795	8.79178	8.57785	8.88686	7.7896	9.68412	9.30132	8.64058	8.73472	8.58171	8.634	8.46116	8.80638	8.40167	9.05505	8.9245	8.3281	8.80406	8.18123	9.22472	8.4384	8.49631	8.47734	9.27281	8.40463	9.28169	9.02521	9.12661	9.14314	8.94347	9.21889	8.81565	7.98496	9.44558	8.31895
ENSG00000006327.14_TNFRSF12A	4.48872	6.14717	4.94285	8.25162	7.4989	7.30845	7.45452	7.90523	7.66826	8.3605	5.67036	7.43227	6.81658	6.96704	5.52215	7.22614	5.2933	8.20114	5.20383	4.84162	5.47095	7.91114	4.8168	7.64141	4.86582	3.58621	4.31651	7.55901	4.52964	6.91616	3.68785	6.02319	3.96023	7.94316	4.39305	6.81803	4.92395	5.98664	7.08137	6.20307	3.88536	6.81259	6.32856	6.33422	4.35832	6.4009	4.14493	7.94803
ENSG00000006432.16_MAP3K9	7.42951	7.23437	6.42665	8.166	7.40505	8.55408	7.60292	8.94237	8.07195	7.15843	8.28958	9.20261	7.09752	7.44157	7.57493	7.92688	6.75077	7.6049	7.56555	7.68723	7.52189	7.6478	6.45364	7.07249	7.23967	4.08095	7.29928	7.94074	7.01905	7.32898	7.34577	8.12018	7.93372	6.80164	6.80939	8.50352	7.56458	7.68178	8.06863	7.18569	7.29899	7.45794	7.83679	7.80719	7.41878	7.49326	8.33331	7.5142
ENSG00000006451.8_RALA	7.86931	7.87026	8.55901	6.49907	5.48566	7.16521	7.85094	6.86158	7.77837	8.59934	6.50575	6.08583	8.20237	8.32861	8.49993	6.94264	8.22575	8.18398	7.95928	8.22096	8.51014	8.1017	7.84234	8.17517	8.0477	7.44171	8.21465	7.64903	8.63552	8.26391	8.59072	7.44845	7.66778	8.28034	8.44392	7.45126	9.068	8.08443	7.53022	8.00501	7.71278	7.93965	8.45761	8.02892	8.13005	7.52813	7.31856	8.14747
ENSG00000006453.14_BAIAP2L1	9.34241	9.51707	9.06464	10.1165	9.34264	9.82443	9.15235	10.4756	10.6762	9.70462	9.20203	9.76641	8.81408	10.1043	9.46376	9.05261	9.65748	8.96777	9.74219	9.62116	9.41656	10.0386	8.56048	9.14542	9.06599	5.19659	8.51698	9.20772	9.78551	9.42334	9.44073	8.54915	9.14535	9.14292	8.68859	8.42517	10.0566	9.95687	9.93694	10.1116	9.07148	9.41074	9.58834	9.9901	9.49662	8.99223	9.24173	9.54018
ENSG00000006459.11_KDM7A	9.40081	9.42894	9.47441	8.97914	9.30216	8.97872	8.91437	8.39059	9.62395	9.96671	9.14999	8.80211	8.96082	9.72763	9.24275	8.09128	8.98214	8.28	9.54733	9.35539	9.4543	9.97189	9.1231	9.66587	9.33082	8.56662	9.31891	9.46437	9.49327	9.15438	9.47435	8.7619	9.19545	9.70519	9.40773	8.90407	9.86518	9.49505	9.30558	9.55239	9.32955	9.50944	9.53472	9.52602	9.47702	8.33571	8.71634	9.61548
ENSG00000006468.14_ETV1	3.88944	3.23088	3.72867	4.17752	1.7056	4.23729	4.68546	3.84778	3.94766	4.0262	1.7056	1.7056	4.28987	4.16507	4.78147	4.39435	4.08503	6.47223	2.83792	5.10458	4.11624	3.6802	6.37858	4.87098	4.63388	6.32572	5.04667	4.06108	3.79866	5.58219	4.03541	6.72574	4.33086	4.5077	4.41377	5.11231	3.936	5.80623	4.29812	3.75285	4.98012	5.27161	6.55079	4.49349	5.29419	5.32624	2.93947	4.07669
ENSG00000006530.18_AGK	6.97992	6.76783	6.60191	6.54288	4.61061	6.43835	6.55043	7.00499	5.98122	7.02504	4.87227	6.80406	6.78508	7.33873	5.72584	7.04898	5.81623	6.76219	6.55897	6.49461	6.47352	7.30765	6.78259	7.80924	6.66471	6.79417	6.58089	6.77262	5.89102	6.98493	5.93511	5.27214	6.43086	8.02053	6.56454	7.53615	6.05765	6.34167	6.35845	6.59456	6.14737	7.02641	6.97672	5.83296	6.62941	6.93473	6.79967	6.8651
ENSG00000006534.16_ALDH3B1	6.75334	7.47193	6.4431	7.1976	7.28151	7.45585	7.27527	7.75972	5.06285	6.71111	6.06675	8.06717	7.31331	7.48785	6.69994	6.60359	7.13708	7.28903	6.67537	7.68296	7.09117	7.16302	6.15043	7.29914	6.19469	5.74252	6.57777	5.97044	5.83344	7.43373	6.87254	7.26745	5.79582	7.38961	7.26364	8.05997	7.47191	7.39934	5.95694	7.91751	6.56648	6.65222	6.58534	7.07027	6.35837	7.80642	6.40139	6.84819
ENSG00000006555.11_TTC22	8.86636	8.9704	9.24316	9.2164	12.257	7.95058	8.3486	9.46904	9.78137	7.80477	11.336	9.97035	8.34164	8.32359	10.1438	6.48654	8.85685	8.15702	10.2772	9.066	9.2573	6.63531	9.17941	7.48155	9.03321	5.12769	8.80832	7.55139	10.5058	7.75952	9.80592	7.27145	9.12678	7.3612	9.28716	7.75813	9.89341	8.43704	8.4445	9.25103	8.95133	7.16208	8.91326	10.0003	8.83332	7.98608	8.89759	7.67174
ENSG00000006576.16_PHTF2	6.75373	6.42674	6.7695	5.29782	4.14613	6.2237	6.63572	5.54023	6.86309	7.07174	6.2995	5.51982	6.71852	7.08768	7.04939	6.50816	6.67218	7.19785	6.88541	5.86465	7.30761	6.70995	7.07064	6.96393	6.9243	7.38126	7.14767	6.50174	7.24391	6.425	7.1675	7.07294	7.26178	7.31974	6.5209	6.09171	7.03329	6.26526	7.39759	6.28623	6.51288	6.11166	6.75229	6.61646	7.27586	6.76435	7.57608	6.74593
ENSG00000006607.14_FARP2	8.75963	8.4304	8.56447	8.15235	7.99893	8.52271	8.61135	8.77849	8.99875	8.38994	8.62502	8.58437	8.55455	8.91327	8.98051	8.64435	8.54236	8.45374	9.01511	9.04572	8.56731	7.17353	8.19334	8.44197	8.9013	7.4688	8.71075	8.88436	8.8016	8.11226	9.16405	8.29433	8.96283	8.22975	8.6014	9.30918	9.05931	8.9578	9.07172	8.39008	8.78333	8.57547	8.50757	8.9899	8.98904	8.28266	9.35946	8.51591
ENSG00000006611.17_USH1C	9.53561	9.5784	9.38822	8.71929	9.4257	8.62592	9.13077	9.68752	9.72077	9.4521	10.4208	10.0901	9.12669	9.23116	9.94972	9.46595	9.52715	8.74886	9.93946	9.69875	9.83243	9.44403	8.9882	9.25861	9.32319	4.34243	9.29072	9.35472	9.96519	8.92842	10.2188	9.12768	9.73764	9.2606	9.60099	9.95867	10.4432	9.56367	9.44844	9.57223	9.57456	8.84478	9.45232	9.96194	9.34504	8.74667	9.87068	9.06819
ENSG00000006625.18_GGCT	5.97397	6.53081	6.80284	7.06256	5.00414	6.23447	6.34107	6.24649	5.13019	7.87458	6.41433	7.18735	7.37596	7.30675	6.15843	6.34183	6.03066	6.98057	5.76069	6.08358	6.83901	7.15931	6.21405	7.27015	6.8044	5.48129	7.04493	7.27473	5.26985	6.74264	5.64112	6.41122	5.91554	7.66346	6.82955	5.96188	6.08952	6.3889	5.69421	7.87058	6.2325	6.86881	7.24777	5.80983	6.01097	6.64679	5.8041	7.8533
ENSG00000006634.8_DBF4	5.72766	5.55425	5.98477	5.01253	1.7056	4.89994	5.82853	4.723	5.06957	7.19337	3.57188	5.21372	5.8671	6.55323	5.68593	5.80921	5.56101	6.45331	5.07567	5.4568	5.96824	6.59697	5.18248	6.8059	6.17352	3.62748	5.99672	6.71232	5.61397	6.67976	5.05601	6.59331	5.3108	7.37156	5.43279	5.88582	5.61407	6.41803	5.91857	5.84839	5.21983	6.48789	6.25069	5.13636	6.09153	6.43088	5.44992	6.36363
ENSG00000006652.15_IFRD1	7.70809	7.77409	6.94642	7.01846	6.53738	8.08363	7.16962	6.20222	9.6327	8.20946	7.03713	7.27483	6.91848	8.19832	7.45018	6.91935	8.19206	7.22123	7.13148	7.59493	7.65728	8.43158	7.30873	7.35987	7.70078	7.5037	7.12564	7.7331	7.98684	7.73494	7.63386	7.47782	6.59568	7.07221	7.08621	7.06034	8.29407	7.64551	7.98045	6.83308	7.16204	7.32554	8.47848	8.4278	7.94361	7.08501	7.27505	7.66995
ENSG00000006695.12_COX10	7.69484	6.92783	7.52016	5.67384	6.17652	6.39032	7.16854	5.4939	7.15506	6.78151	6.2536	4.86266	7.24955	6.63194	7.07482	6.72335	6.60312	7.04486	7.0162	6.97096	6.98585	6.30318	7.06237	6.41661	7.69216	6.66719	7.84266	7.52029	6.66996	6.9611	7.08729	6.73386	7.08217	6.7332	7.25661	7.00858	7.01745	6.19403	7.64201	6.62883	6.95066	7.04116	6.02543	6.2444	7.01401	6.7132	6.83304	6.68734
ENSG00000006704.11_GTF2IRD1	6.98299	8.91813	6.36339	10.0614	6.86523	8.87458	7.51542	10.2762	7.94016	9.14997	6.59166	9.21759	7.23717	9.1346	6.5771	9.24474	7.35741	8.60257	6.62469	7.2083	6.80481	9.29301	6.79645	9.31559	6.7488	7.23841	6.90979	9.3901	6.16413	7.82455	6.78518	8.03221	7.38181	9.27988	6.85683	10.4572	6.5598	7.941	8.36593	9.65057	7.31799	8.46933	8.98448	7.84271	7.30217	7.48012	7.34224	9.35616
ENSG00000006712.15_PAF1	6.43838	6.71245	7.0974	6.7499	6.41183	7.6088	6.13531	6.36916	6.90783	7.00617	6.47709	7.21879	6.73176	6.71878	6.98595	6.46651	7.13186	6.88253	6.5269	6.9369	7.03375	6.49665	6.9399	6.62536	6.93389	7.39467	6.93691	6.50005	6.95268	7.1618	6.7661	6.78326	6.9461	6.94572	6.75051	6.98637	6.94596	6.99614	6.41847	6.81583	6.66139	6.53425	6.36732	6.85186	6.66535	6.91703	7.23612	6.70066
ENSG00000006715.16_VPS41	7.88479	8.01721	8.45235	7.50517	9.47795	7.53145	8.43031	8.35993	7.5936	8.41042	8.92628	8.54781	7.85677	8.60927	7.86452	7.59669	8.52379	7.79112	8.07004	8.17292	7.82607	8.40955	8.19492	7.94582	7.7482	8.84723	7.89079	7.61752	8.03879	7.61141	7.89373	7.58494	8.06305	8.20184	8.18291	8.04067	8.27392	8.00625	7.82167	8.76645	8.27245	7.94621	8.28438	8.1053	7.94666	7.84174	7.9877	8.20556
ENSG00000006740.17_ARHGAP44	9.14406	8.4174	9.33126	7.1263	10.8083	7.97456	9.52282	8.24696	8.4131	5.92019	10.0407	9.23805	8.61374	7.60043	8.30261	4.80321	8.17908	6.63761	9.24491	8.73881	8.34292	5.91826	8.27071	5.11679	8.99699	5.84593	9.11189	8.79349	8.77249	7.11538	9.12128	4.2324	9.23873	4.8524	8.80935	6.10867	8.63255	7.53715	8.50965	8.61629	9.08013	7.92455	7.52561	9.09408	8.70286	4.89926	8.62536	6.43746
ENSG00000006744.19_ELAC2	8.03716	7.80864	8.05592	7.97994	8.40567	8.09829	8.15134	7.80075	7.08265	7.87729	7.83898	8.80748	8.66642	7.58927	7.14063	8.41884	7.8961	8.79158	7.70393	7.55178	8.12992	7.01731	7.58457	8.32204	7.80372	8.45953	7.91353	8.53135	7.22099	8.24936	7.5482	8.6043	7.92427	8.64424	7.82891	8.5774	7.56275	7.33553	8.12068	8.06947	7.75567	8.01862	7.20394	7.2947	7.65311	8.29856	7.75412	8.0573
ENSG00000006747.15_SCIN	8.83366	8.45588	9.64185	5.49791	10.5507	6.60295	7.64254	5.99131	9.3475	6.10622	9.79166	8.18375	7.11711	6.84496	10.2997	3.43326	9.19665	8.01301	9.42828	8.69698	9.27535	4.87731	8.43723	5.69979	8.89988	3.43453	9.29216	4.69163	9.86628	7.49739	10.4718	7.30229	9.41188	4.97333	9.25986	4.62501	8.66759	8.26173	8.9601	7.00879	9.00619	5.42755	7.91273	9.18816	8.94153	6.48536	8.41903	5.81676
ENSG00000006756.16_ARSD	8.75879	8.88657	9.87203	9.35806	10.0609	7.66324	9.23396	8.91578	8.05326	7.83582	8.60322	7.80212	8.30586	9.28454	8.1331	8.07101	8.85162	8.60597	8.84626	8.19963	7.89101	9.47653	8.68977	8.28037	7.99521	6.98162	8.15665	7.43798	9.25805	8.4695	9.34776	8.64269	8.76508	8.19432	8.07779	7.47649	8.3496	8.68965	8.06969	10.1589	8.21238	8.85391	8.43788	8.38626	8.4852	8.7869	7.55766	8.68774
ENSG00000006757.12_PNPLA4	5.03781	4.7438	6.59771	4.59769	4.33327	4.20435	3.67538	3.58671	4.86042	4.83157	4.54344	3.55144	5.05435	5.03704	5.32826	4.5303	5.38843	5.22828	4.58824	5.01027	5.46851	4.89203	5.35823	5.40378	5.04669	4.7715	5.00034	4.626	5.4208	5.27309	5.95239	4.64213	5.88295	5.56175	5.43912	4.27453	5.17398	4.59111	4.61682	4.11105	5.63827	5.00614	5.53879	4.35505	4.55853	4.86841	4.76602	4.70884
ENSG00000006831.10_ADIPOR2	9.3758	8.80721	9.52824	8.14762	7.00673	7.60369	8.70522	7.99951	10.2606	8.74401	8.50612	7.95713	8.99995	8.84518	9.9877	7.37201	9.10749	8.43871	9.21333	8.52371	9.87829	9.25332	9.00219	8.96759	9.12553	8.23721	8.95698	8.41392	9.89491	8.67842	9.61252	8.06327	9.00988	9.38644	9.13312	7.93102	10.1355	9.17283	9.1806	8.03234	8.86066	8.75187	9.17952	9.06904	9.01462	8.49557	8.25736	8.65655
ENSG00000007047.15_MARK4	6.27768	6.91432	5.40842	7.8575	8.68601	7.2911	6.94588	8.37257	5.90424	6.61674	7.80455	7.87557	5.13498	7.05855	6.39193	6.61031	6.85127	7.42875	6.21543	6.96241	5.80406	6.64646	6.32239	6.8588	6.05569	7.68446	5.52596	6.38565	5.97091	7.07913	5.64556	6.6983	6.99521	6.53404	5.89969	7.30506	6.00087	6.69886	6.62905	6.66395	6.78545	6.57864	6.57334	6.22275	6.39986	6.82979	5.81935	6.3311
ENSG00000007062.12_PROM1	8.9382	9.58998	8.06694	8.49183	8.76155	8.99539	8.38294	7.82072	9.79707	8.77421	9.85754	8.64314	9.78396	9.77458	8.91477	10.8159	10.3553	9.69522	10.2874	9.98238	8.86972	9.89612	8.75175	9.42368	7.23854	4.92162	9.33509	8.707	10.3017	9.06918	10.6538	10.4418	9.87523	9.04832	10.0558	6.13769	10.7353	10.1557	7.7007	9.85928	9.89358	10.275	10.3847	10.7749	8.64122	9.8704	9.73001	8.42284
ENSG00000007080.11_CCDC124	5.83789	6.76731	6.48682	6.62036	5.47509	6.69849	6.36767	6.75925	5.86027	7.28616	6.09746	7.37328	6.67819	6.47965	5.54275	6.17616	6.20056	7.01979	5.83447	6.18499	6.29465	6.33171	6.24855	6.00396	6.07548	6.58733	6.39107	6.50922	5.62269	6.85812	5.79846	6.38305	6.16979	6.88876	6.33196	7.03713	6.10641	5.60778	5.86946	6.56401	6.34019	6.53248	6.32351	6.39562	5.98314	6.44404	6.6054	6.58645
ENSG00000007168.14_PAFAH1B1	9.79912	9.70717	10.0932	9.07323	12.1793	9.63288	9.72981	9.65619	10.3417	9.26096	11.0259	10.1878	9.7818	9.11276	10.2855	9.42567	9.70789	9.49042	10.3183	9.77487	10.0551	8.44837	10.1397	9.4146	9.76155	10.8322	9.77797	9.51469	10.5856	9.40961	10.3027	9.19785	9.96346	9.45519	10.0357	9.14143	10.4299	9.36927	9.60703	9.55754	9.79883	8.95755	9.45245	10.1253	9.71482	9.50677	9.72299	9.1808
ENSG00000007171.18_NOS2	7.58667	5.85515	7.34219	8.45401	1.7056	7.48697	6.53074	9.94306	8.85838	8.57394	4.1908	6.14236	4.48982	7.65012	7.99591	6.00028	6.70361	7.00575	6.52793	6.51717	6.06448	7.6165	7.46043	9.03454	8.15782	4.1228	7.10536	9.06628	6.49257	10.722	6.75818	7.67251	6.7187	8.86014	6.13	8.54474	6.70773	7.85557	5.98507	6.73283	6.80375	8.61907	9.75824	9.12794	10.7031	9.96888	8.85417	7.59506
ENSG00000007174.18_DNAH9	4.83598	3.23178	3.44317	1.7056	3.34734	4.52962	4.24132	4.04526	6.86458	3.70579	4.58757	6.8505	3.60134	2.88655	4.86425	3.84396	4.25852	2.9532	5.02136	5.2293	3.15131	2.31854	4.84003	4.49507	4.12756	2.23499	2.61831	4.53453	4.75826	3.15661	3.54291	6.03955	5.46717	3.557	3.72037	3.08415	5.03045	3.69391	4.75482	3.73826	3.69989	3.02196	3.7196	4.3243	5.75264	3.38533	5.10074	3.69903
ENSG00000007202.15_KIAA0100	10.2589	10.2839	10.1125	10.7938	9.15616	10.4023	10.4666	10.2385	10.006	9.90788	9.07557	9.51201	10.6014	9.88233	9.75851	10.9622	9.77984	10.5383	10.2647	9.59444	10.4343	10.7365	10.1559	10.1701	10.1443	10.3327	10.0125	10.5075	10.0996	10.2909	10.0186	10.7023	9.71183	10.1658	9.96625	10.8213	9.99018	10.5879	10.3056	9.93928	9.67814	10.4649	10.2908	10.0111	9.9266	10.4579	9.74995	10.8569
ENSG00000007216.15_SLC13A2	6.22987	5.8263	7.17901	3.98253	6.1256	4.82718	6.91567	6.06008	8.65314	5.20854	7.79167	6.54179	5.52142	3.70699	6.53348	1.7056	3.61235	1.7056	6.63837	3.78715	6.92643	6.04126	7.86681	5.73584	7.13821	1.7056	7.86027	3.51196	8.30565	6.1271	5.97512	1.7056	4.77283	5.46432	3.83652	3.44842	6.13481	4.42804	7.2228	6.81933	6.76129	4.22653	3.68616	4.449	3.09222	1.7056	4.66713	3.3217
ENSG00000007237.19_GAS7	6.7433	5.7064	6.33114	5.47841	5.30245	8.29058	7.13569	7.19317	7.32091	6.21112	6.28082	6.39084	8.22603	6.03847	7.08637	4.71109	8.79555	6.35153	6.34205	8.06688	6.96395	5.51894	9.23725	6.11048	7.08201	9.98026	7.0052	5.68235	6.77724	7.16381	6.29308	5.74954	7.67902	5.36056	8.38111	6.79184	6.23842	6.26756	7.27313	6.66806	7.95369	4.56504	6.31175	6.43124	6.99533	5.99874	8.09233	5.34782
ENSG00000007255.10_TRAPPC6A	6.0834	5.95486	6.53459	6.06523	6.13347	6.27432	6.69371	5.66393	4.91714	6.40933	6.69581	6.05589	6.0463	6.14703	5.25183	5.60716	5.9017	5.35651	6.0245	6.41078	5.07257	6.05087	5.58668	6.04109	5.99138	5.73818	5.70662	5.38957	5.69392	4.93663	5.78708	5.16101	5.04553	6.0678	6.03223	5.58832	5.23987	6.46005	4.97105	6.84984	6.14487	6.21683	5.61729	5.84807	5.49286	4.71592	6.13469	6.14417
ENSG00000007264.15_MATK	4.61328	2.7371	5.0606	1.7056	1.7056	5.00289	4.41702	2.99042	4.19364	2.57928	4.62332	4.52896	5.19678	3.14371	4.35444	1.7056	4.25964	3.6292	5.28728	4.01851	5.25789	2.69133	3.81165	3.07852	4.04933	3.54577	6.18634	3.54366	5.27519	5.13374	5.6375	4.37232	4.82667	3.35382	3.87853	4.42555	4.51067	3.38906	4.80315	3.27176	5.27132	2.76032	4.78732	4.54208	4.82656	3.53983	5.92123	3.36002
ENSG00000007306.15_CEACAM7	12.5791	12.4651	14.0307	7.51558	8.38817	8.74277	9.78034	10.2166	14.9317	11.1542	10.8984	8.99736	10.6095	12.0315	14.7478	3.32389	14.0061	7.46234	13.8806	13.0305	13.4389	10.3793	13.108	7.97135	12.7235	3.96916	11.2118	7.55871	15.4438	8.90325	14.2338	5.13588	13.4191	6.79995	13.4539	4.89718	14.9031	13.2482	13.2087	8.72477	13.7611	9.84866	13.7169	13.8801	13.4184	9.83232	13.089	11.6632
ENSG00000007312.13_CD79B	3.37639	2.35728	4.84213	2.72651	1.7056	3.79484	4.01743	1.7056	3.6336	2.86523	4.64676	4.72661	3.49862	3.46465	4.02611	2.40572	5.0311	2.31728	6.48165	4.13603	4.52937	3.69759	4.45685	3.32927	3.52505	2.85641	4.8499	3.2888	5.06428	5.094	3.17337	2.70554	5.38179	4.03972	3.90216	1.7056	4.84583	4.1769	3.40358	2.52874	4.78236	2.5578	4.63734	3.59742	4.61559	3.3225	7.4027	3.47406
ENSG00000007341.19_ST7L	5.23505	5.12882	4.87744	4.87617	4.64049	5.50014	4.67733	4.95131	5.12174	5.06261	5.85964	6.24182	5.24143	5.31165	4.94121	5.2341	4.8932	5.14435	5.58995	5.25887	4.86182	5.36912	5.49832	5.34516	5.11714	5.6347	5.42759	5.20832	4.85387	5.28825	4.74013	4.93749	5.01022	5.31733	4.99267	5.43791	5.13248	5.08014	5.45746	4.74635	5.37335	5.65493	5.45136	5.09018	5.13483	5.06653	5.51021	5.37378
ENSG00000007376.8_RPUSD1	7.11209	7.45838	6.80571	8.75924	8.36664	7.93769	7.37011	7.74967	6.12288	7.0785	8.46376	9.02118	7.73402	7.22218	6.71858	7.38903	6.75034	6.64906	7.28227	6.66127	7.12616	7.60706	6.4926	7.40666	6.54444	6.4152	7.01193	7.55683	6.98518	6.62475	7.03905	7.18394	6.92022	7.60353	6.94461	8.35764	6.76678	7.34884	6.82964	7.75535	6.80663	6.80109	7.37	7.28041	6.90766	7.23266	7.29692	7.90031
ENSG00000007384.15_RHBDF1	6.71635	7.77084	6.56668	8.53521	7.00524	8.70741	7.71042	9.58386	9.33705	8.43227	8.49226	9.57223	6.5635	8.54376	8.02993	8.79432	7.58874	8.04097	7.88687	7.97293	8.17287	9.71927	7.65947	8.5746	7.18685	7.29844	7.0816	8.51851	7.99296	7.01934	8.26517	8.7583	7.93937	8.24549	7.40006	9.92334	8.57344	8.51712	8.61907	7.66828	7.09406	7.59505	8.26351	8.51489	7.56106	8.31651	9.31546	8.59792
ENSG00000007392.17_LUC7L	7.07481	7.3082	6.28545	7.19753	6.95228	8.61634	6.91654	7.94591	7.74195	7.74952	7.43256	8.06284	7.00428	7.68578	7.17249	8.04596	7.576	6.71409	7.51819	7.45059	6.93523	8.52316	7.17559	7.1763	7.12772	7.77903	7.50273	7.5415	7.31808	7.21	7.86295	8.2855	7.62465	6.83592	7.12791	8.93797	7.35471	7.87501	7.72995	7.78801	7.53607	7.87495	7.92059	7.68677	7.69407	7.17287	8.0831	7.49884
ENSG00000007402.12_CACNA2D2	4.6181	4.28014	4.75075	4.73053	6.12587	4.601	5.30855	4.88589	6.0358	5.28909	4.82913	5.9917	5.41511	4.62311	4.9128	3.9013	5.65713	3.46779	4.50068	4.29429	4.58339	5.04125	5.26131	4.97168	5.30644	6.22132	5.15114	6.07621	4.9432	4.23892	4.80462	3.84361	4.52289	6.00121	5.08122	3.87568	4.41335	4.37973	5.03382	5.72528	5.14107	6.54702	3.6309	4.3028	4.12005	3.27205	4.35698	3.54365
ENSG00000007516.14_BAIAP3	6.65125	5.75764	5.96288	5.33767	6.6855	7.24784	6.73855	6.71638	6.98203	5.44313	7.17355	6.77557	6.38158	6.23667	6.09957	7.71417	6.53141	7.62575	6.95084	5.90957	6.20189	7.27218	6.05548	6.04134	6.43566	5.22099	6.72962	6.44918	6.10988	5.13741	6.82015	5.1035	7.18201	6.08653	6.26126	8.36311	6.32689	6.80811	7.60495	6.70152	7.28677	5.76319	5.87399	6.37584	5.44902	4.75551	7.29645	5.55988
ENSG00000007520.4_TSR3	6.44393	7.27547	6.98758	7.42454	9.06529	6.56959	7.04028	7.10187	6.5124	7.07799	8.62617	8.40437	7.24393	6.62535	6.50908	6.94704	6.7162	6.78777	7.53961	6.92127	7.24705	7.17883	6.93891	6.60448	6.84788	7.43552	6.69487	6.70611	7.01897	6.67695	6.88737	6.46788	6.78549	7.04194	6.69216	7.10813	6.68963	6.94079	6.38284	7.6109	6.62783	6.43484	6.945	7.00942	6.08553	6.88322	7.00845	7.03448
ENSG00000007541.17_PIGQ	8.01522	8.3236	7.54452	9.32037	10.0501	8.95034	8.27141	9.85094	7.79669	7.34217	9.44452	10.3668	8.00005	8.20839	7.6912	8.19701	8.00735	7.87342	8.60174	8.32933	7.80499	8.51733	7.67612	8.02085	7.51923	7.76977	7.75774	8.48195	7.89841	7.51842	7.88036	8.32389	8.25553	8.01245	7.71074	8.70097	7.66107	8.70134	8.14577	8.52455	7.93692	8.0667	7.99434	8.31231	7.96185	8.24149	8.62924	8.48519
ENSG00000007545.16_CRAMP1	8.10167	8.39147	7.23165	8.69234	8.90616	9.0683	8.02383	8.86339	8.50441	8.02444	8.54509	9.57839	7.8475	8.48969	7.90435	8.83555	7.92986	8.29453	8.25358	8.01842	7.77836	9.31566	8.22429	8.26842	7.98899	8.54762	8.17679	8.61315	7.87286	8.1085	8.01722	9.00524	8.49254	7.92018	7.51671	9.59445	7.71982	8.54556	8.46621	8.90467	8.05486	8.28205	8.10355	8.3636	8.24325	8.1862	8.78462	8.2693
ENSG00000007866.22_TEAD3	7.6322	7.74767	7.28096	7.11802	8.18885	8.47863	8.27152	8.74556	8.65548	8.05701	8.1524	8.1742	7.25202	7.39997	8.07626	7.31328	7.38088	7.17716	7.82967	7.9934	7.56619	8.07009	8.33153	7.40523	7.73019	9.77867	7.57698	7.13574	7.88851	7.07306	7.96299	8.07127	7.74037	7.47559	7.25795	7.77608	7.81743	7.6996	8.34749	7.86087	7.59479	7.11092	7.31746	7.56842	7.54938	7.35504	8.15168	7.43717
ENSG00000007923.16_DNAJC11	8.75503	8.50564	9.01394	8.99742	7.52958	8.86982	8.72411	8.86655	8.48634	7.84804	8.97422	8.70621	9.10634	8.34944	8.52901	7.93513	8.52651	8.31765	8.81295	8.26044	9.00414	8.45977	8.08459	8.20835	8.73538	7.83623	8.88963	8.88466	8.25777	8.20372	8.85372	8.54676	8.65893	8.2085	8.94707	8.35535	9.01675	8.03181	9.01272	8.43472	8.55719	8.07701	8.22406	8.55854	8.82486	8.3401	8.55624	8.52502
ENSG00000007944.15_MYLIP	6.63183	6.79464	7.28485	5.70035	5.58994	7.60519	6.55619	5.6441	7.67116	7.49265	4.79079	6.06537	6.57105	6.6188	6.55663	7.48255	6.58398	6.32698	7.07278	7.33065	6.49241	7.26735	7.45376	7.28824	7.03837	7.9869	6.91635	7.06113	8.09244	6.52462	7.04701	6.25904	7.25648	7.66888	7.26517	6.73185	6.66739	7.17102	6.65579	7.72917	6.99348	7.46952	7.1662	7.44601	6.93673	7.00983	6.80329	7.01783
ENSG00000007952.18_NOX1	8.76002	8.11812	9.31778	7.47256	7.99802	3.66743	9.18252	7.93661	8.85746	9.13755	7.53931	6.37139	8.7365	8.43676	7.8276	6.41551	7.07774	7.2282	7.82504	6.73214	8.81776	9.50367	7.84673	10.3604	8.63608	2.42323	7.53838	8.43386	8.73805	6.2898	7.42276	5.33899	7.24274	10.5843	6.5638	3.57496	8.35226	8.99494	8.4624	8.78874	8.05148	9.65901	6.87597	6.55236	8.23028	7.42203	7.63998	8.38035
ENSG00000007968.7_E2F2	7.84872	7.50704	7.85491	6.71415	8.32989	6.61775	7.7499	7.58808	6.73023	6.31342	7.7993	8.10231	9.16732	6.47065	6.69372	4.28935	7.08558	7.11582	8.24903	6.91443	8.62115	7.08881	6.98471	6.80584	8.09029	2.91638	7.89541	7.47233	7.45378	7.29884	7.81117	7.66908	7.72005	6.79603	7.52265	5.92183	7.71748	6.57784	7.71121	7.51287	6.83885	6.09384	6.46595	7.58863	7.66613	7.60228	7.5981	7.54266
ENSG00000008018.9_PSMB1	7.17297	7.47198	8.19425	7.03236	6.12526	7.20912	7.82795	6.7884	7.36028	9.00255	5.63335	6.85453	8.393	7.92978	7.68201	7.42907	7.80279	9.00574	6.95195	7.683	7.97245	7.91625	7.59239	7.93484	7.65711	7.9098	7.74121	7.63944	7.82279	8.22252	7.60166	7.64804	7.43695	8.2675	7.98778	6.79974	8.24705	7.90058	6.74522	7.29393	7.74892	7.89964	7.67045	7.43909	7.66418	8.12452	6.96334	7.96103
ENSG00000008083.14_JARID2	7.46776	7.54815	7.32473	7.15876	7.93341	8.34774	7.44832	8.30179	7.51327	8.10593	7.27479	8.05549	7.02637	7.54797	7.10341	7.46777	7.6174	7.2447	7.34151	7.08574	6.84514	8.26194	7.46325	7.16086	7.30412	7.39392	7.61739	7.62941	7.23074	7.79931	7.6932	8.35148	7.82951	7.0148	7.47929	7.93438	7.23859	7.40875	7.96766	8.55091	7.29003	7.63489	7.76527	7.25383	7.90806	6.49447	8.21091	7.67899
ENSG00000008086.13_CDKL5	5.9811	5.85423	5.60455	4.63595	5.50997	4.92361	5.352	5.30842	5.80509	6.20813	5.51921	4.6922	5.59086	6.46449	5.87602	5.97849	6.39305	6.22689	5.14854	6.27075	5.34862	6.35095	6.45443	5.10391	5.91379	6.97437	6.15307	5.71535	5.62435	5.66964	5.93451	5.91688	5.96107	5.26545	6.38774	6.42206	6.49373	5.62048	5.76851	5.97503	6.55393	7.23142	5.30564	6.08591	5.77118	6.04109	6.27279	5.97152
ENSG00000008128.23_CDK11A	5.86417	6.07789	6.30289	7.12871	7.05634	8.29132	6.76976	8.54186	8.3501	6.33339	6.18734	8.02473	6.30778	8.00364	7.50177	6.49255	6.59423	5.45792	6.9937	7.3078	7.35829	7.30552	6.94428	6.0432	7.18423	5.81536	7.20261	7.15559	7.66323	7.10266	7.38042	8.14531	8.22086	6.25252	7.05054	7.20274	7.70343	7.04998	7.96717	7.77689	7.06207	7.14148	7.48249	7.19153	6.96463	6.2748	8.7628	6.55207
ENSG00000008130.15_NADK	9.49249	9.20582	9.5315	9.59983	9.90483	9.31995	9.6684	9.89961	9.64247	8.46543	9.8241	9.71501	9.50158	8.88391	9.73077	8.3436	9.49833	8.61037	10.2296	9.46482	9.78648	8.68787	9.29031	8.92267	9.39189	8.07228	9.43747	9.27068	9.91876	9.1831	9.91664	9.01423	9.66236	8.8639	9.62662	9.01632	10.1479	9.1385	9.53652	9.013	9.42203	9.07244	9.29134	9.74136	9.34019	9.30404	9.79053	9.17553
ENSG00000008226.20_DLEC1	5.21406	4.71107	4.9253	5.08752	6.75391	5.26552	4.9757	5.34832	5.42281	3.57942	6.95262	5.96289	4.43841	5.22631	5.3153	6.49	5.27711	3.85965	5.92175	5.52332	5.57909	4.76439	5.57157	4.64675	5.53899	4.21327	5.41854	4.8526	5.70469	3.4589	6.1417	4.50407	5.66949	3.93589	4.67854	4.12774	5.50037	4.92802	6.21768	5.94789	5.38418	4.98923	4.71735	6.08986	4.83567	4.7933	5.10208	4.5697
ENSG00000008256.16_CYTH3	6.67286	6.3774	6.28763	5.92168	7.38608	6.94805	7.08467	6.35294	7.07205	6.35597	6.17363	5.97873	6.45062	6.7787	7.01265	6.29968	6.62686	6.95937	6.31832	6.83218	6.64271	6.23584	7.84451	6.03116	6.65726	7.97302	6.58986	6.12523	6.58628	6.29719	6.24271	6.56455	6.44158	6.40401	6.59862	6.93453	6.4451	6.17291	6.59007	6.73638	6.77229	5.76301	6.44975	6.48514	6.386	6.44803	5.71949	6.69945
ENSG00000008277.15_ADAM22	6.69749	5.74254	5.71792	5.5465	5.69935	5.68007	5.84929	6.81881	6.109	5.33432	4.08865	5.03995	5.36701	5.96736	6.6616	4.9252	6.28582	5.54463	6.24023	6.09022	6.04277	5.51234	6.85973	5.68315	6.44789	5.89141	6.46542	5.13719	6.76261	4.95292	6.82814	6.66316	6.55107	4.96506	6.21148	6.40892	6.47719	5.59958	6.25076	5.49828	6.44782	6.34577	5.97633	6.31694	6.5362	4.75536	5.80781	5.0582
ENSG00000008282.9_SYPL1	8.55697	8.65785	9.20463	7.93809	1.7056	7.63112	8.98043	8.07631	7.6884	9.13834	7.65392	7.04448	8.78592	8.99504	8.25559	8.42721	8.35185	8.88582	8.06934	8.30478	8.7847	9.65801	8.71542	9.06843	8.56036	9.87098	8.44818	8.61585	8.53762	8.61137	8.48268	8.28385	8.07912	9.64247	8.65889	7.59319	8.82195	8.93587	7.66213	8.59652	8.19279	9.16616	8.77555	8.13656	8.30567	8.93843	8.32063	9.48085
ENSG00000008283.16_CYB561	8.75406	9.00678	8.42892	9.5787	8.92793	8.9548	9.09859	9.34329	7.76344	8.69952	8.47109	8.76985	9.07623	8.72416	7.87345	9.30759	8.3138	9.63777	8.964	7.92192	8.89551	9.55389	7.98121	8.58433	8.1863	6.95455	7.74294	8.64997	8.16555	8.7495	7.99365	9.00357	7.84515	8.74126	8.27008	8.95026	8.57807	8.15465	8.12786	8.80219	8.27095	8.86242	8.3878	8.29364	8.70998	9.32472	7.6493	9.09016
ENSG00000008294.21_SPAG9	9.38674	9.25642	9.23705	8.99582	10.7132	9.49415	8.87584	8.84008	10.4443	9.31439	9.81446	8.96591	9.2483	9.49196	10.3067	9.91546	9.55172	9.06294	9.59501	8.83783	9.36458	10.893	9.37012	8.8667	9.02602	9.91908	9.21854	8.89114	10.1354	8.78001	10.0335	9.08145	9.86747	8.86018	9.29896	9.6178	9.64699	9.00121	9.85509	9.00076	9.32129	8.95558	9.72158	9.79726	9.97936	8.92394	9.39772	9.61671
ENSG00000008300.17_CELSR3	6.82533	8.52032	4.76928	9.76876	6.68742	7.62136	7.02142	9.13742	7.33108	8.66774	6.17551	7.66735	5.75411	8.89583	6.08004	8.25019	6.85866	6.34447	6.3194	5.84174	5.75236	9.25775	5.62004	9.3468	5.95955	5.44039	5.74186	7.64582	6.29609	6.71141	6.01489	8.7802	6.72157	9.22638	5.74323	9.83309	5.39219	8.20978	7.24767	7.01241	6.09479	9.4957	8.67165	7.19807	7.47301	7.02272	7.36942	8.45545
ENSG00000008311.16_AASS	5.60998	5.06698	4.62378	5.97118	5.21873	5.52665	5.13572	5.13931	5.645	4.588	5.14221	3.31809	5.33133	5.1222	5.88517	4.3197	5.62742	5.47857	5.01828	5.1171	4.67437	5.89667	6.63719	4.94953	4.85477	7.31761	5.61059	5.00922	4.64133	5.57411	5.22091	5.49266	5.54182	4.66549	5.71498	6.2796	5.02974	5.89049	6.58523	6.13408	5.74277	5.54173	5.39535	5.00261	6.19597	5.94027	5.75806	5.7114
ENSG00000008323.16_PLEKHG6	9.22992	9.2062	8.98236	10.0089	11.4218	9.26303	8.94544	9.74644	10.4269	8.23276	11.5523	10.9604	8.68444	9.23176	10.3521	7.14738	10.1452	6.44136	10.5194	10.0408	9.26406	8.93869	9.00403	8.37841	9.32047	5.18408	9.45808	9.36859	10.2582	7.75787	10.2728	7.67163	10.2822	8.4622	9.44022	8.91068	10.3266	8.99022	8.91572	9.61774	9.44844	8.12569	9.15935	9.80476	9.23815	7.15585	10.7741	9.03496
ENSG00000008324.12_SS18L2	4.6428	5.49915	5.83678	4.20892	2.90204	4.60031	5.53663	4.01039	4.69457	5.39265	3.10422	4.78237	5.57145	5.35531	5.55815	4.91406	5.71138	5.43166	5.54912	6.02327	5.56933	5.32085	4.98568	5.54684	5.47592	4.68011	5.46825	5.9454	5.25498	5.41027	5.31418	5.37802	5.56127	5.64927	5.53531	4.88484	5.75507	5.28242	5.23206	4.04475	5.2249	5.17277	5.62843	4.8012	5.03904	5.56334	5.58128	5.30982
ENSG00000008382.16_MPND	7.60164	7.40925	7.6766	6.47669	8.21288	6.30921	7.38558	7.59821	7.83347	6.49455	8.33768	7.97967	7.13186	7.2235	7.53664	6.26339	7.33171	6.20605	7.98003	7.61814	6.83913	6.2144	7.17124	5.6528	7.60241	6.08115	7.50486	6.17764	8.22832	6.79462	7.96359	5.9596	7.68258	5.63342	7.2821	6.31595	7.50652	6.4705	7.34828	6.98951	7.34867	6.55578	6.42484	7.33455	7.27556	5.07036	7.9057	6.22286
ENSG00000008394.13_MGST1	8.67449	8.30422	9.16008	5.47633	4.24089	5.90966	8.3352	6.07923	7.08795	8.03277	5.73309	5.44674	8.81086	8.0042	7.8705	6.30664	8.68721	7.27481	7.74151	7.93416	9.08876	8.82459	7.64694	7.41474	8.10367	5.91187	8.10291	8.35062	7.59389	7.66589	8.78525	5.39059	8.30793	8.2304	9.26907	6.27331	9.74356	8.62674	7.75339	6.95771	7.94585	8.29324	8.10612	7.68879	8.42733	7.46898	8.03056	8.26919
ENSG00000008405.12_CRY1	6.58436	6.23265	6.70903	5.59571	5.26144	6.51644	6.83086	6.6293	7.1229	6.85251	5.34637	5.56597	6.69146	6.6467	6.79805	6.45532	6.93714	7.55092	6.42381	6.00418	6.65329	6.50967	6.4615	6.9677	6.86942	6.96032	6.212	6.03482	6.28206	7.45083	6.70811	7.28386	6.94056	7.07708	6.40058	6.56008	6.81294	6.56189	7.2107	5.67452	6.25702	6.31845	6.84872	6.30709	6.65627	6.86578	6.37499	6.24498
ENSG00000008441.18_NFIX	8.60063	9.06375	8.62888	10.3331	8.62359	9.02288	9.08919	9.06667	8.57364	8.59363	9.15639	9.67924	9.50359	9.13793	8.37023	9.3292	9.14999	8.2607	7.45779	9.12633	8.51621	9.17812	9.9895	9.68393	8.7566	11.2627	8.82097	8.56356	7.92536	8.42842	7.74513	8.8588	8.46968	9.81161	9.04414	9.88434	7.56885	8.88017	8.52091	9.98521	8.49984	9.18133	8.16083	7.98547	8.55672	7.95709	8.83964	9.78658
ENSG00000008513.16_ST3GAL1	6.35277	5.17678	5.61486	6.58653	4.6347	7.7305	6.67642	8.42855	6.36086	7.85726	7.08471	8.17183	7.09047	5.34027	6.1774	7.35775	7.45125	8.54108	6.15768	6.51559	6.19063	8.8463	6.8441	6.06356	5.75584	7.22432	6.55496	5.36282	6.01119	7.99447	5.61369	7.02693	7.20412	5.43659	6.91085	10.6537	6.05079	6.03969	6.9032	8.0431	6.59965	5.8302	6.15207	6.47808	6.81143	7.34781	7.26087	6.92145
ENSG00000008516.18_MMP25	4.97412	3.92739	4.6586	5.59823	6.26846	8.14397	3.57821	5.5508	4.83986	4.42153	3.06804	5.71789	4.52598	4.13032	3.92568	5.43816	5.08425	5.7577	4.4824	4.789	3.7756	4.54367	4.23665	4.50047	4.77145	3.46447	3.81926	4.20637	4.65875	6.2517	4.40909	6.20919	5.89717	4.70079	4.31616	4.6532	3.82309	5.11671	4.50546	5.04981	4.59088	3.92184	4.48955	4.51531	5.84767	5.79194	5.5636	4.99937
ENSG00000008517.19_IL32	8.99878	9.94031	10.0385	9.53579	12.2805	9.72176	7.39387	9.2196	11.5926	9.77296	12.1086	11.0558	7.90978	9.34374	11.2273	8.30084	9.40135	10.22	10.9913	9.66584	9.45923	9.51204	8.89875	9.28531	9.93749	5.79455	9.24634	8.59932	10.9417	9.76921	10.8868	7.49231	11.2371	9.40627	9.33935	8.50446	10.6435	9.92019	8.43215	9.88587	9.35954	8.02153	10.0351	11.2587	10.5685	10.0987	9.06772	9.78046
ENSG00000008710.20_PKD1	10.2242	10.6649	8.81818	11.702	11.73	11.9477	10.4848	11.8727	10.7914	9.92332	11.4627	12.0337	10.0025	10.2273	9.84371	10.8853	10.3583	10.1755	10.2942	9.90608	9.58549	10.9595	10.9046	9.78567	9.89328	12.2457	10.0592	10.8626	9.76082	10.0041	9.68116	11.3455	10.4127	9.54495	9.75659	11.6619	9.32785	10.4958	10.8356	11.2018	10.4501	9.98614	9.86211	10.3966	10.0313	9.49143	10.4507	10.4709
ENSG00000008735.14_MAPK8IP2	4.41381	4.43963	3.30268	5.40945	4.99697	5.83295	5.23828	6.25074	4.62488	2.94664	5.34865	1.7056	3.20172	6.38224	4.35626	4.70189	4.26086	3.94231	4.18392	3.78794	3.9043	4.90521	5.31759	4.62423	4.77048	6.57447	3.60054	3.9883	4.55308	4.90514	3.91824	3.346	4.62481	4.51729	4.20695	3.70521	4.77843	3.80489	4.55751	5.44613	4.46238	3.53582	3.55676	3.92331	5.30604	5.45441	4.8754	3.01338
ENSG00000008838.20_MED24	8.6182	8.83881	8.47031	9.52673	8.87456	8.7103	8.98512	9.13227	8.68446	8.69095	8.82173	9.33179	9.15469	8.8111	8.31139	9.10618	8.50021	8.59892	9.01453	8.62775	8.73215	8.96351	8.28519	8.59971	8.63044	7.98423	8.61351	8.8751	8.15377	8.63872	8.44982	8.76505	8.73091	8.70991	8.5484	9.25977	8.45614	8.2262	8.62957	8.82336	8.39231	8.85136	8.69866	8.62836	8.64077	8.50526	9.00671	9.22768
ENSG00000008853.17_RHOBTB2	5.57346	5.08376	5.07743	6.7671	4.29038	8.29978	5.38139	6.36372	5.71732	7.67152	4.909	4.97571	6.1232	7.21562	4.53243	6.12218	7.3991	6.00097	5.30863	6.89574	5.2856	5.59077	6.8271	6.1302	5.07718	7.60072	5.84664	6.40524	5.47236	7.47217	5.97425	7.01874	6.36632	5.37848	6.28719	6.7483	5.13594	6.80633	6.13655	7.23158	5.89083	6.31586	6.98028	6.95037	6.05202	6.04705	7.01351	6.66658
ENSG00000008869.12_HEATR5B	8.79355	8.21531	8.41223	7.48962	6.93457	8.35126	8.48536	7.97084	8.51735	8.03223	6.7385	6.70912	8.01955	8.39125	8.36282	9.00923	8.25223	8.41639	8.76115	8.37286	8.46445	7.7579	8.51081	7.94969	8.46153	8.39187	8.68995	8.1525	8.75481	8.2988	8.74521	8.55844	8.41867	8.06581	8.47099	9.0347	8.62095	7.92283	8.97496	7.89709	8.41156	8.60662	8.21133	8.52898	8.93803	8.37959	8.54034	8.45763
ENSG00000008952.17_SEC62	7.50593	8.25463	8.65249	7.28621	6.23847	7.86337	7.73872	6.36181	8.17294	8.10384	7.60128	6.65996	8.33743	7.98628	8.34801	7.92652	9.33547	8.60558	6.87665	8.48637	8.37179	7.82761	8.95556	7.6962	8.07294	9.59073	8.42665	7.11229	8.4456	8.55982	8.44274	8.01784	8.2975	8.0779	8.49288	7.15735	8.71474	7.97442	7.44005	7.74339	8.22204	8.27745	7.95635	8.2172	7.86156	7.89678	8.59837	7.57736
ENSG00000008988.11_RPS20	9.73854	10.5008	10.6766	10.044	6.35403	9.91505	10.9727	10.1836	9.0842	11.4837	10.4022	9.7263	10.6469	10.6048	9.77057	10.8531	10.799	10.3502	9.42177	10.4777	9.9839	10.3603	10.6984	10.4013	10.285	10.7077	10.1712	10.1258	9.54663	10.4241	9.69689	9.95984	10.1357	10.5677	10.3413	10.4251	9.45676	9.61897	9.3442	9.74212	10.3399	10.2343	11.0757	10.1091	9.93044	10.5657	10.7036	10.9263
ENSG00000009307.16_CSDE1	10.7101	10.6933	11.2556	9.47878	8.19882	9.96558	10.7495	9.76222	10.5584	11.0525	9.93795	9.25657	10.9133	10.7549	11.0909	10.0812	11.2241	10.7262	10.478	11.4753	10.8326	10.5188	11.4472	10.4625	11.037	12.6089	11.1064	10.501	10.9583	10.9625	10.933	10.3383	10.8618	10.6394	11.2278	9.86553	10.9694	10.6007	10.472	9.01133	11.0287	10.9255	10.8888	10.5665	10.8673	10.9058	10.7787	10.8216
ENSG00000009335.18_UBE3C	9.20976	9.25348	9.28157	9.18236	7.48583	8.73336	9.16542	8.99681	9.00533	9.3309	8.35821	8.29154	9.47719	9.49811	8.93195	8.95882	8.83205	9.38798	9.02663	9.06277	9.22699	9.94762	8.99181	9.78264	8.49699	8.78714	9.12817	9.11169	8.89237	9.27183	9.12617	9.3932	9.05219	9.7751	9.21161	9.40146	9.22025	9.26567	9.11725	8.78052	9.19904	9.45878	9.35538	8.78703	8.93401	9.37944	8.38389	9.53149
ENSG00000009413.16_REV3L	8.31553	7.68972	7.91844	6.1971	7.74905	8.37306	7.99337	5.65978	7.55978	8.3705	6.78042	5.4288	7.94781	7.58718	7.99606	8.12689	8.42335	8.6081	7.30247	8.6962	8.15559	8.88343	8.83247	8.18861	8.13851	9.49255	8.37042	8.52197	7.5854	8.22786	7.7398	8.89474	7.95068	7.95626	8.01442	8.98948	7.19438	8.47064	8.33114	7.85652	8.30006	7.9884	7.7592	7.39142	8.25906	8.62399	8.33616	8.22879
ENSG00000009724.17_MASP2	5.03144	3.53833	3.73042	2.78729	1.7056	4.77169	3.64581	1.7056	3.61248	2.92443	1.7056	1.7056	3.57922	3.99851	3.71052	3.54762	4.00042	3.97381	3.64694	3.21029	4.14584	4.01406	4.98722	4.5812	4.51128	5.0238	4.73708	4.09766	4.21096	3.85693	4.11275	4.2882	3.94055	4.44182	3.62933	4.21971	4.01265	3.62919	4.40999	2.57683	4.42231	3.95174	4.15234	3.57359	4.38578	3.54079	3.12565	3.88234
ENSG00000009765.15_IYD	7.77032	8.28891	7.0819	7.52614	6.81042	6.25252	7.21992	6.20576	7.85486	7.66751	6.5109	5.7295	6.53564	8.03793	7.8008	5.66056	6.88322	5.65116	7.43813	8.31042	6.02741	7.54928	6.92604	7.01187	7.01549	2.30736	6.91923	6.55216	8.45677	7.05005	7.77023	5.69053	6.1496	7.36492	7.36499	6.2249	6.95881	8.33853	6.72364	7.0766	7.26016	8.32716	8.08527	7.2322	6.84386	5.86276	6.42511	8.11056
ENSG00000009780.16_FAM76A	5.54211	5.52268	5.32139	5.09676	5.50125	5.36168	5.6666	5.70587	5.71626	5.42742	5.79224	5.63355	5.11549	6.34247	6.7192	6.07705	6.05409	6.34829	5.6596	6.38036	6.56582	6.0495	6.108	5.75013	5.98382	6.50696	6.26462	5.67708	5.95512	5.89188	6.23249	5.85669	5.95225	6.18226	5.91201	5.0773	6.16635	6.50174	6.01659	5.5155	6.49349	6.34987	6.20605	5.72959	6.00691	5.49119	5.88097	5.69132
ENSG00000009790.15_TRAF3IP3	3.99706	3.31703	4.78762	3.6133	4.12729	6.11205	3.62075	3.35632	4.03063	3.48895	6.34327	4.21764	4.65189	4.14678	4.18409	4.15751	5.18235	5.08047	4.88875	3.96136	4.703	3.63997	3.60458	5.45439	4.6897	3.88552	5.61345	3.81256	5.02267	5.97561	4.93487	3.2128	5.965	4.67175	4.88303	3.78309	4.77032	4.55852	5.3216	3.37794	4.80284	3.43021	5.64097	5.28121	5.97488	5.10853	6.71637	3.64839
ENSG00000009830.13_POMT2	6.80514	6.56036	6.15276	7.83119	9.75821	8.28139	7.44042	8.89325	6.71677	6.31648	8.28024	8.4855	6.47394	6.50065	6.6226	6.88142	6.45535	6.63095	7.00519	6.81658	6.60984	6.16363	6.4551	6.69875	6.62444	6.85313	6.97834	7.2257	6.84752	6.83891	6.60482	8.16307	7.18707	6.71969	6.21253	8.22883	6.52015	6.31089	7.52739	7.55744	6.74205	6.76326	6.8218	7.01779	7.12921	6.36698	7.70912	7.04884
ENSG00000009844.16_VTA1	7.39944	7.07157	8.51435	4.36196	4.00585	5.31634	6.75931	5.0706	7.41973	8.33323	5.80025	4.43879	7.61042	7.20318	8.11165	7.24091	8.07188	7.86407	6.93264	7.82538	8.0268	7.74714	7.55848	7.30757	7.83276	6.95809	7.69255	6.54075	8.17403	7.68522	8.14828	7.44504	8.06912	7.54644	8.45569	6.50982	8.77398	8.01843	7.39272	5.39337	7.74332	7.57398	7.65513	7.24787	7.80368	7.49832	7.16936	6.66271
ENSG00000009950.16_MLXIPL	5.04055	8.44194	4.29988	9.75615	7.77255	8.98693	5.96756	9.44176	7.05734	6.83948	7.49577	8.15601	5.04285	7.46651	6.59667	7.95649	5.09179	6.0987	4.98142	4.79233	5.33722	9.10714	6.33491	6.92027	6.59941	3.97057	6.3154	8.30848	5.29507	7.64294	5.86481	8.66778	5.18719	6.87283	5.20232	10.0928	4.04651	8.18064	7.02523	10.0246	6.15541	8.25383	9.53729	7.48901	5.50346	5.18964	6.79807	8.08327
ENSG00000009954.11_BAZ1B	8.64308	8.83482	8.8293	9.79409	9.67522	8.90123	8.82127	9.7225	8.56786	9.85183	9.07226	9.2863	9.05938	9.59218	8.66859	9.2577	8.96991	9.29321	8.95366	8.97685	8.84154	9.41491	9.05474	9.48714	8.86316	9.63128	8.96655	9.56132	8.69295	9.28713	8.45094	9.28246	8.86988	9.76358	8.93322	9.41052	8.62223	9.12009	8.80957	9.35101	8.7329	9.1152	9.28479	8.74809	8.96652	9.39861	8.89841	9.39835
ENSG00000010017.13_RANBP9	7.56484	7.36189	7.86643	7.29318	8.04171	7.954	7.15974	8.31886	7.87795	8.33788	7.48101	7.98454	7.37828	7.63924	8.15136	7.54222	8.05771	7.86523	7.57663	8.18073	7.7236	8.06096	8.01108	7.55614	7.78509	8.0772	7.57092	7.55687	7.67362	7.98739	7.94161	8.04339	8.11732	7.70401	7.7839	7.53397	8.28606	7.79685	7.88006	7.82514	7.92326	7.4856	7.8402	7.40019	7.74678	7.73632	7.91715	7.49621
ENSG00000010030.14_ETV7	5.92438	5.69304	5.49734	5.27072	4.6775	6.0911	4.08909	1.7056	5.54994	5.28385	3.88839	4.0844	5.48771	6.02887	6.23422	4.21424	4.64041	7.14375	6.42999	6.11201	6.22939	4.99134	5.04662	6.53907	6.45058	3.07952	4.54514	4.48742	4.47726	6.45185	4.74497	4.2074	7.11743	6.45742	5.32636	3.51779	7.16276	7.15958	4.85059	5.59385	5.91655	4.98273	5.89258	6.45644	6.77115	7.05267	5.86472	5.69617
ENSG00000010072.16_SPRTN	6.06681	5.69481	5.95459	7.23135	8.89379	6.73684	5.93791	6.12545	6.37048	5.89866	6.9756	8.0967	6.2365	5.92558	6.00794	6.81403	5.77069	6.57545	6.34189	5.68617	6.39857	6.44141	5.45261	6.48889	6.11124	6.11341	6.07719	6.17457	6.21679	6.09817	6.41402	6.18172	6.06749	6.75415	5.91082	6.11339	6.40106	6.45643	6.5184	6.98102	5.73052	6.03856	6.12379	6.29053	6.59927	5.9087	6.29686	6.16697
ENSG00000010165.20_EEF1AKNMT	7.2073	7.66542	7.48146	8.28152	8.05555	7.42597	7.82861	7.64897	6.98018	7.97516	8.58449	8.48082	7.86108	7.53117	7.20154	8.74716	6.88278	7.36396	7.52955	7.42294	7.31566	8.12371	7.16626	7.33188	7.40141	7.09972	7.32191	8.00352	7.08554	7.62082	7.08127	7.66687	7.25466	7.52023	7.1191	7.92503	7.03897	7.51671	7.20892	8.62368	7.13484	7.56879	7.50337	7.57882	7.33235	7.53359	7.01049	7.65637
ENSG00000010219.13_DYRK4	4.98343	3.84821	5.1978	4.17277	1.7056	4.36925	4.5908	4.48891	4.56256	5.49138	1.7056	3.46274	5.45079	5.6745	4.34451	4.64641	5.4238	4.33496	4.63164	5.22203	4.35297	4.94529	4.81972	5.75785	4.46456	6.05497	4.14122	5.35605	3.79845	5.88283	4.75827	6.39871	5.10257	6.28159	4.98358	4.99241	4.33949	4.92144	5.05981	3.49605	4.25383	5.69165	5.56357	3.87428	4.93045	5.51258	5.63588	5.36744
ENSG00000010244.19_ZNF207	9.71572	9.48475	10.0819	8.52899	8.34629	9.04166	9.37784	8.8601	10.0755	10.1282	8.30712	8.33773	9.83728	10.0007	9.92578	10.3966	10.2028	10.1701	9.28788	9.94985	10.1377	10.2497	9.70647	9.75221	10.0996	9.58283	9.98598	9.88114	9.74031	10.0155	9.98647	9.85864	9.55589	10.12	10.0976	9.89754	10.4897	10.7175	10.0986	8.36372	9.91535	10.1261	10.1874	9.7538	10.0102	10.4401	9.72446	9.75023
ENSG00000010256.11_UQCRC1	10.7123	10.3989	11.1435	9.7666	10.529	9.35277	11.0848	9.5093	9.89735	9.23285	10.9558	9.9008	10.8887	9.59767	10.6121	7.89571	10.0417	9.41536	10.7619	9.95982	10.9329	8.56014	9.84888	9.15914	10.267	9.49222	10.3429	9.75101	10.3703	9.5546	10.5982	9.20125	10.1889	9.56617	10.657	7.91047	11.1838	9.41313	10.064	9.34596	10.2807	9.71233	9.41256	10.2034	10.2007	9.42144	9.46799	9.82007
ENSG00000010270.14_STARD3NL	6.27329	5.83322	6.3182	5.52708	4.4039	5.14989	6.00454	4.70231	6.07764	6.63276	4.61792	4.61564	6.02589	6.62633	6.30111	5.96231	6.02318	5.18747	5.74033	6.35133	6.09715	6.70133	6.11049	6.50345	5.94278	6.59669	5.83197	5.42272	6.0673	5.8221	6.02543	5.88822	5.94511	6.93593	6.19209	5.52567	6.39046	6.37268	5.94801	6.85997	5.81556	5.94541	6.2723	5.43186	5.48868	6.29616	5.73715	6.22365
ENSG00000010278.15_CD9	10.6751	10.8462	11.2855	9.09289	7.90789	8.78284	10.537	9.13079	10.3573	10.2256	8.91756	8.47004	10.8227	10.3452	11.0105	8.21393	10.8422	9.92642	10.4367	9.85696	11.2879	10.2236	10.3678	10.5151	10.5301	10.1724	10.3751	10.5095	11.0985	9.55749	11.1955	9.28861	10.4609	11.0369	10.9488	8.94703	11.7462	10.6763	10.2831	9.96588	10.2193	10.3647	10.106	10.3368	10.4163	9.27965	9.77014	10.3787
ENSG00000010292.13_NCAPD2	9.0714	8.79012	8.83921	9.17882	7.27067	8.3207	8.96981	8.7499	7.3393	9.28183	8.04146	8.43833	9.18643	8.53294	8.24681	8.50383	7.97739	9.43845	7.9958	7.987	9.01809	9.5623	8.13966	9.78135	8.77521	7.88639	8.82086	9.59998	7.81906	9.35521	8.09174	9.25698	8.045	10.2369	8.38183	8.52094	7.82822	9.09544	8.66852	9.45495	8.18797	8.98323	8.68086	8.06201	8.64627	9.33373	8.74544	9.46116
ENSG00000010295.20_IFFO1	5.89821	5.40595	4.44393	5.18703	4.23893	7.94912	5.15339	7.54314	5.46783	4.87722	6.17787	4.99644	5.44565	5.93853	5.31145	4.60137	6.8119	5.59581	5.06823	5.98035	4.93922	5.49762	6.55703	5.99452	4.727	7.65853	5.43712	5.03391	5.72264	6.6511	5.16354	6.78851	7.07307	5.21258	6.31924	5.91064	4.94088	5.33842	6.40296	4.65795	6.24071	4.81945	5.42807	5.60073	6.38897	5.66883	7.30865	5.1863
ENSG00000010310.9_GIPR	5.50231	4.9347	5.39195	6.10486	8.9199	5.25285	5.92902	7.32635	6.47355	3.5862	6.16606	6.99212	4.6956	5.14246	7.68789	6.09737	5.28036	6.09582	6.55976	5.21018	6.1317	3.44079	6.26727	4.06384	4.98692	2.81671	5.16235	4.13676	6.09551	4.89859	5.82184	6.07831	5.65371	3.37475	4.62516	4.63878	5.20134	4.62942	7.78017	5.69565	6.13784	4.14537	5.50618	5.98616	6.63211	4.64466	6.13304	3.97153
ENSG00000010318.21_PHF7	5.98555	5.61177	5.43883	5.43548	5.75248	4.58084	5.27647	4.63263	5.11239	3.2376	6.00747	3.77311	5.28631	4.88761	5.29217	4.66505	4.85498	4.7123	5.91691	5.17825	5.19963	4.34075	5.29338	4.59714	5.43552	4.92863	6.07629	5.14189	5.50657	5.30761	5.94908	5.28543	5.80499	4.71971	5.633	3.79832	5.11397	4.92289	6.01712	6.03039	5.56401	5.24399	4.74191	5.31422	5.91644	5.13287	5.62144	5.14645
ENSG00000010319.7_SEMA3G	6.96536	4.1431	4.98806	4.46806	4.23461	5.98454	6.80754	3.02104	6.67599	3.2046	7.32221	4.9993	7.43874	4.13089	6.33081	3.58119	7.5494	4.29403	3.79864	6.70735	5.02073	3.09839	7.07954	4.45657	6.52075	6.52753	8.10427	3.62509	5.73674	5.19377	5.32465	5.18029	6.17037	3.53933	6.27353	3.29912	5.03754	4.53171	5.74876	2.94778	6.99427	2.96874	3.05653	5.21262	6.67683	4.24864	3.87954	3.59659
ENSG00000010322.16_NISCH	9.51762	9.45564	8.38251	10.2572	9.85906	10.6217	9.55287	10.4129	9.77964	8.26216	10.0873	10.1863	8.95443	9.30323	9.30981	8.78698	9.3537	8.91802	9.37829	9.40716	8.79816	8.96878	9.48717	9.04383	9.09007	9.96712	9.27691	9.57726	9.32167	9.3109	9.27686	9.93206	9.95642	8.6347	9.2124	9.99145	8.84743	8.77859	10.0156	9.78005	9.56947	9.25452	9.05205	9.44439	9.41662	9.14071	10.4769	8.74271
ENSG00000010327.10_STAB1	9.59025	8.19643	8.22597	9.2603	9.40138	10.9618	9.26224	10.5223	9.07567	7.11455	8.4051	9.76524	9.60794	7.97355	8.5611	7.59913	9.81249	8.42461	9.04102	8.87171	8.04791	8.09704	9.8954	9.02373	7.3737	10.1114	8.52175	7.84728	8.14097	9.32665	7.94052	10.32	11.0191	8.14705	9.44739	8.50416	8.28996	8.4405	10.3799	8.0809	9.00132	8.09768	8.69032	9.41543	9.17502	8.81668	9.86814	7.8655
ENSG00000010361.14_FUZ	5.03201	4.80933	4.0952	5.42889	5.06638	4.10389	4.8618	5.83254	4.32954	3.80759	5.81363	6.21068	4.6871	4.70956	4.38035	4.30285	4.79488	3.5194	4.31627	5.25086	4.86554	4.46634	5.24645	4.58137	4.00613	5.86246	4.49962	4.71189	4.65763	4.90225	4.93014	3.64157	4.9354	4.35421	4.63979	6.79175	3.90492	3.24547	4.16779	6.37438	4.70572	5.05144	4.65878	4.92136	4.59396	3.49404	5.24344	4.77818
ENSG00000010404.18_IDS	8.43489	8.26373	8.1549	8.3566	9.46913	8.37592	7.63925	8.28743	9.6297	8.66033	8.37469	7.86384	7.73751	8.70368	8.97207	7.96748	8.58865	8.30229	8.50372	8.55435	8.08249	8.34356	8.99576	8.81234	8.3465	9.86978	8.15564	7.79424	9.45969	8.79484	9.00897	8.06356	9.32117	8.72973	8.68621	8.77044	8.33155	8.22259	8.1812	8.67556	8.85584	7.50324	8.6786	9.01833	8.34951	8.11914	9.37848	8.2572
ENSG00000010438.17_PRSS3	8.30773	8.3989	9.16702	7.98408	9.87329	6.72246	8.36895	8.27238	9.60163	7.53177	10.2836	9.11814	8.12291	8.08633	9.40402	7.17654	8.08787	7.36113	9.29401	8.61272	8.93009	7.41371	8.13169	6.81872	8.63123	3.46019	8.38233	6.76279	9.65664	8.05452	9.32247	7.31763	8.45069	7.07489	8.72463	7.53134	9.44	8.25853	8.29605	8.47073	8.49356	7.101	8.39729	8.99296	8.20427	7.78625	7.7522	7.66996
ENSG00000010539.12_ZNF200	5.80238	5.60462	5.18024	6.1116	4.5184	6.59459	5.66299	6.28952	4.64375	5.85204	5.61376	4.7343	5.56284	6.08151	5.01971	6.1891	4.50052	6.40352	4.82039	5.59358	5.26483	7.3357	5.06246	6.35059	5.29302	5.6966	4.87262	6.23813	5.5456	5.65672	5.28708	6.07484	4.97382	6.36067	5.49853	6.06584	5.65575	7.56206	5.44811	6.53451	5.03965	6.15812	5.72691	5.58272	5.28493	6.72812	5.20563	5.94773
ENSG00000010610.10_CD4	5.81657	4.73271	6.07901	4.84031	3.55871	6.08453	5.56121	5.47785	5.28833	5.47487	6.3892	6.73629	6.0623	5.00612	5.56468	4.02485	7.50129	6.29514	5.73452	6.12158	5.50679	6.15468	6.52258	5.91757	6.30382	6.76744	5.15422	4.83567	5.39962	7.80757	4.81049	6.76957	6.82486	5.01147	6.14137	5.16042	5.49859	6.20959	5.51061	4.28384	6.97707	5.3401	6.13753	6.51263	6.56506	7.36253	6.60016	5.31936
ENSG00000010626.15_LRRC23	4.07104	5.06438	3.84988	5.70255	4.86446	4.65062	4.97912	5.36126	3.26125	3.68964	5.08273	5.27984	4.50528	4.31881	4.29973	4.15435	5.05649	5.18573	3.94316	4.48164	3.75314	4.44027	4.53924	4.22688	4.3704	5.09362	3.91828	5.0574	4.77345	4.42622	4.1012	4.20461	3.21087	4.29022	3.54305	4.27209	3.80324	3.80924	4.26646	5.85963	4.54181	4.41638	4.04506	4.17269	4.00167	4.27098	4.07267	4.54451
ENSG00000010671.16_BTK	4.6828	4.0507	4.85003	3.64211	3.6345	4.95184	4.83934	3.00726	4.71697	4.01148	1.7056	4.13403	4.50922	4.35783	4.71384	3.25045	6.64108	4.42587	5.62534	5.95223	3.8283	4.17596	5.31344	4.97005	4.68143	4.85294	5.50967	3.71004	5.17877	6.4969	4.83885	4.87116	6.35539	3.81652	4.80115	4.93886	4.81346	5.12534	4.75338	3.39677	5.84704	3.97258	5.27008	4.93547	5.43075	4.60674	7.11693	3.90319
ENSG00000010704.19_HFE	6.16975	6.35591	5.8923	4.75438	7.12825	5.18801	5.13296	5.18431	4.7871	6.63891	5.51642	6.56386	5.97974	5.54904	4.71159	6.2444	6.09261	6.6517	5.78973	5.24794	6.05085	5.33367	5.78954	6.30617	5.48606	6.43648	5.72576	5.77738	5.58473	4.91518	5.75556	6.58488	5.47974	6.07834	5.5304	5.08716	6.01437	6.55179	4.50738	6.83329	6.05873	5.46063	5.33173	5.25607	5.29692	7.21147	5.39343	5.91802
ENSG00000010803.16_SCMH1	7.25254	7.18482	6.77228	6.84125	6.65483	6.70847	7.10843	7.31466	6.73814	6.77173	5.14486	6.23941	7.19092	7.25736	6.56391	6.63822	7.24796	6.52411	6.67232	7.2058	6.44981	7.49188	7.47209	7.01899	6.9311	8.38574	7.0493	6.89876	6.45487	7.00647	6.59685	7.0036	6.68073	6.8423	7.34269	6.68273	6.66379	7.92714	6.74379	6.92964	7.01637	7.56459	6.53516	6.58246	6.87048	7.33443	6.72534	6.60843
ENSG00000010810.17_FYN	6.82953	5.4962	5.96781	6.31759	6.31587	7.8133	6.12564	7.89672	6.41394	7.57145	6.95099	7.26423	7.04338	6.38626	6.96509	6.62465	7.74904	7.27911	5.94734	6.70476	6.40066	6.75797	7.56382	6.89591	5.99195	7.99809	6.50387	5.64449	6.30929	7.51499	6.52692	7.55416	8.11306	6.20391	6.85354	6.51345	6.58902	7.72631	7.3611	5.61301	6.65492	6.55863	6.71732	6.9316	8.17063	7.06836	7.28943	5.73281
ENSG00000010818.10_HIVEP2	7.85687	7.31648	7.28034	7.51175	5.48778	8.9795	7.62181	7.33566	8.31532	8.60596	7.6115	6.62205	7.18248	7.69343	8.023	7.96428	8.05793	8.56244	7.42715	8.07953	7.6238	8.91191	8.06584	8.03597	7.51004	8.65844	7.30366	7.85907	8.02235	8.74211	7.60066	8.51677	7.92687	7.8532	7.84414	8.16977	8.03954	8.28116	8.33191	7.04106	7.87695	8.09412	8.61231	8.13488	8.53211	8.45935	8.51522	7.52095
ENSG00000011007.12_ELOA	7.7483	7.59988	8.08101	7.83093	7.87746	8.41987	7.90238	7.78154	8.03437	7.95746	6.85554	7.31114	8.33739	7.87474	8.16316	8.16209	8.09912	7.45742	7.88826	8.29098	7.87632	8.06876	7.90425	7.62687	8.00999	8.22436	7.92796	8.45474	8.1377	8.3364	7.90138	8.36096	8.16994	7.70219	7.88553	8.45884	8.30356	7.63997	7.95685	7.47534	8.12899	7.51643	8.01332	7.88716	8.23927	7.86078	8.41188	7.94933
ENSG00000011009.11_LYPLA2	8.19785	8.26299	8.56532	8.58898	9.89557	8.35231	8.75234	8.88867	8.59796	8.0408	9.33603	9.17502	8.70363	7.87173	8.5907	7.57169	8.48236	8.29683	9.18561	8.35553	8.96118	8.29165	7.86515	7.93932	8.30001	6.26472	8.20779	8.085	8.71405	8.07769	8.575	7.5478	8.37968	7.95209	8.34566	7.68691	9.02265	8.06214	8.31085	8.34079	8.03639	7.61654	8.15957	8.52032	7.97786	8.0084	8.0386	8.29113
ENSG00000011021.23_CLCN6	7.30629	6.68825	5.98264	7.15378	6.48526	7.50793	6.59424	7.88057	7.98391	5.86564	6.405	6.76485	6.49243	7.22423	7.19538	6.29372	6.94327	6.95568	6.74878	7.54986	6.88269	7.09705	7.42911	6.55143	6.7471	7.70025	7.31673	7.52462	7.0761	7.30464	7.40375	8.3227	7.55761	6.35662	7.10708	7.9352	6.88974	6.62622	7.87247	7.14659	7.21482	6.48629	7.42121	7.12714	7.43404	6.68063	8.95616	6.9877
ENSG00000011028.14_MRC2	6.93736	5.18571	5.64234	7.42735	4.13374	8.76391	6.65252	8.17713	7.05835	6.79949	7.58269	7.94617	8.81499	6.51937	7.01921	6.48577	6.99276	6.40767	5.87366	6.32671	6.42904	7.19682	8.6935	7.26843	5.89722	8.69441	6.2587	6.44248	6.03055	6.81485	4.57529	7.66467	7.58857	6.80416	8.54369	8.19588	6.22951	6.30494	6.85985	7.07592	7.29847	6.63565	6.10862	5.98855	5.80008	7.19735	7.08867	6.65372
ENSG00000011083.9_SLC6A7	7.20734	6.62123	5.8972	7.00183	9.29785	7.40572	7.20225	6.34839	8.30258	4.47834	8.06553	6.95028	6.8282	6.30783	7.33065	3.75997	6.47111	3.95053	8.33891	7.50217	6.96778	6.04496	7.3229	6.5272	7.18785	1.7056	7.51148	5.71048	6.73732	5.56324	7.5103	5.97107	8.00889	6.3212	6.6382	3.59845	7.84928	7.25002	7.6746	6.153	7.27846	5.57845	5.68934	7.18335	7.12315	3.18787	7.4684	5.29475
ENSG00000011105.14_TSPAN9	5.93131	5.88884	5.17469	5.79496	5.99	7.12159	5.70394	6.47716	5.447	6.18953	5.33341	4.97344	6.62888	6.11617	5.50778	5.21895	6.70956	6.61766	5.44116	6.2117	5.44383	6.32871	7.20029	6.40006	5.44748	8.23266	6.25412	5.70269	4.87736	5.81664	5.8581	6.68561	4.99526	6.1002	6.08923	6.26871	4.8341	5.32233	5.9315	6.72463	6.69496	6.51133	6.55106	6.04081	5.25133	6.79432	5.01911	6.18043
ENSG00000011114.15_BTBD7	8.45775	8.13054	8.47677	6.92323	6.26232	7.80664	8.32206	7.37795	8.40909	7.81903	6.22772	6.7032	8.17123	8.28389	8.44403	8.1451	8.39957	7.65652	8.22464	8.19944	8.3628	8.13367	8.64207	8.15512	8.37845	9.08536	8.5731	8.16424	8.8508	7.8784	8.85242	7.88547	8.41661	8.113	8.69354	8.6128	8.75658	8.72776	8.46697	7.27388	8.49243	8.48107	8.541	8.20804	8.69308	8.34859	8.25319	8.14562
ENSG00000011132.12_APBA3	6.22028	6.75413	6.14268	7.67185	7.85096	7.23846	6.92138	7.81698	7.67815	6.42695	7.81499	8.11552	5.88062	6.3421	6.43621	6.76086	6.44027	5.88409	6.70211	6.86806	6.08031	5.94387	6.04363	6.03115	5.99866	6.38694	5.86784	6.44634	6.23377	6.58684	6.48156	6.46316	6.72049	5.85311	6.17063	6.31518	5.68342	5.62902	6.24099	7.2672	6.332	6.14112	6.11047	6.72966	6.31836	6.38806	7.14649	6.30998
ENSG00000011143.19_MKS1	6.20951	6.10928	5.27507	5.55631	4.82619	5.89276	5.90561	5.82209	4.99158	5.97478	5.10846	5.52038	5.72473	6.31483	5.28208	7.19522	5.83508	6.36416	5.65392	5.70431	4.90333	6.47264	5.84471	6.34262	5.98242	5.56737	5.67644	6.55106	4.95428	6.25889	5.61774	6.28342	5.48957	6.02693	5.8798	6.87158	5.33773	5.42674	5.81848	5.94463	5.76012	6.21945	6.39989	5.40685	5.56383	5.95371	6.39238	6.73126
ENSG00000011198.10_ABHD5	7.06807	7.12929	7.91347	4.66698	5.59089	6.88532	7.04567	5.70557	7.9025	6.08321	7.41912	5.26162	7.23945	6.73105	8.22145	5.93776	7.66814	6.71903	7.5158	7.732	7.40549	5.98824	6.8552	6.04591	7.20274	6.61149	7.60761	6.46285	9.02633	6.64057	8.51325	6.58895	7.43753	6.16962	8.02814	5.11133	8.21412	7.19541	7.00253	4.98189	7.78636	6.67239	7.76021	8.17206	6.86013	7.38541	7.17294	6.29835
ENSG00000011243.19_AKAP8L	7.51403	7.62917	6.66211	8.23013	8.26349	8.83774	7.23845	8.47803	7.93251	7.38471	8.42272	9.15383	6.94437	8.05397	7.6894	7.63228	7.91252	7.52882	7.98261	7.86541	7.18186	7.43525	7.48138	7.91278	7.66554	7.92546	7.5667	8.18306	7.4962	7.47973	7.77231	8.05802	8.24906	7.60436	7.28225	9.06154	7.30236	7.32877	8.08182	8.04459	7.84311	8.0913	7.65981	7.9616	7.60244	7.25357	8.61907	7.68969
ENSG00000011258.16_MBTD1	7.51055	7.62702	7.1675	7.19732	4.53575	6.61841	7.15983	6.07764	6.54955	7.57389	5.07126	5.63718	7.11402	7.46274	6.94909	7.67614	7.09136	7.45134	6.97625	6.95922	6.93624	8.31685	7.11648	7.44831	7.37835	7.49671	7.14553	7.4614	7.40082	7.07804	7.4133	7.12182	7.09844	7.41683	7.41523	7.88966	6.78518	6.3009	7.0586	7.19114	7.25342	7.29843	7.33485	6.65284	7.18163	7.16454	6.63722	7.39822
ENSG00000011260.14_UTP18	5.45405	6.34511	6.45657	7.12659	6.48647	6.60516	6.71025	7.02313	5.65155	7.06235	4.96135	7.68102	6.79479	7.11881	5.33634	7.12907	6.14905	7.3033	6.00751	6.78315	6.38734	7.85602	5.66912	6.88924	6.30704	5.71612	6.47927	6.63895	5.71566	6.78423	5.60421	6.56801	6.01191	6.88319	6.17215	6.28776	5.45136	6.01926	6.14294	7.15143	6.03405	6.63654	6.70319	6.19785	5.91273	6.85454	6.2763	7.66535
ENSG00000011275.19_RNF216	7.5271	7.94135	7.43283	8.87281	8.50994	8.48708	7.84382	8.30708	7.94961	8.39939	7.87534	8.86048	7.60109	8.61507	7.00994	8.06735	7.65822	8.37388	7.42426	7.49894	6.92822	7.98566	8.1982	8.39858	7.569	9.44346	7.4612	8.17511	7.03127	8.12336	7.38526	8.2458	7.58804	8.36919	7.41569	9.56746	7.09663	7.67057	7.87351	8.85098	7.5764	7.77983	7.83608	7.52448	7.65997	8.17578	7.86686	8.28869
ENSG00000011295.16_TTC19	8.57845	8.7703	8.22701	7.9475	10.7167	8.50964	8.85713	8.54689	7.9763	7.63696	9.71783	8.97912	8.86072	8.03644	8.23565	7.79773	8.35945	8.08143	8.70049	8.39215	8.4974	7.49171	7.72438	8.15514	8.42626	7.33156	8.4884	8.94199	8.79938	8.11736	8.92778	7.99679	8.32649	8.43084	8.93957	7.48731	9.29285	8.20942	8.21183	8.52553	8.21369	8.14009	8.08942	8.65185	8.23066	8.25365	8.05848	8.02634
ENSG00000011304.22_PTBP1	10.1829	10.1611	10.2158	9.87489	8.59218	10.1932	10.2738	10.2181	10.3328	10.9081	9.67772	9.62295	10.7099	10.4617	10.1539	10.5271	9.99447	10.7053	9.93547	10.3049	10.4734	10.3065	9.9904	10.6523	10.3968	8.82313	10.3812	10.7707	9.90982	10.536	10.0947	10.7827	10.2151	10.9154	10.2883	10.3057	10.2991	10.1438	10.5578	10.0451	9.93972	10.4949	10.306	10.0048	10.3297	10.7224	10.7817	10.4786
ENSG00000011347.10_SYT7	6.50377	6.18439	6.7706	9.78052	9.58136	7.43388	7.4143	9.39267	7.34181	8.13908	6.87114	6.67373	6.36981	8.59824	7.07528	8.97825	6.76248	4.0312	7.05755	6.02495	7.73846	8.44584	5.57031	7.16117	6.33185	5.57871	5.81205	6.60935	7.01506	6.75957	5.88848	7.84692	7.46149	7.52354	5.49676	9.28099	6.47923	6.44429	7.64599	7.59086	6.79838	6.97638	8.2627	7.06005	6.3403	3.44966	8.63245	8.39565
ENSG00000011376.12_LARS2	7.77269	7.76555	7.93141	8.35191	7.35946	7.4743	8.04277	7.52027	6.99321	7.51796	7.12375	7.59849	8.47364	7.70251	7.39844	6.59682	6.9498	7.75451	7.83106	7.16011	7.95741	7.56443	7.09102	8.27437	7.69683	7.12706	7.57589	8.18447	7.27435	7.21692	7.22252	7.15226	7.14763	8.53354	7.67576	7.59951	7.71194	7.33401	7.59894	8.23627	7.23245	8.38552	7.19095	7.10517	7.76924	7.77225	6.99812	7.92939
ENSG00000011405.13_PIK3C2A	8.93526	8.50429	8.94997	7.89675	6.77435	8.04939	8.62659	8.13007	8.87992	9.50924	5.65044	6.30024	8.76587	8.69321	9.10912	9.10984	9.02292	9.34288	8.56549	8.79958	9.06011	9.39477	9.14718	9.04743	8.99313	9.54012	9.15312	9.39076	9.16423	8.94248	9.14678	9.1857	8.63198	9.28702	8.83136	8.97302	9.2189	9.15542	8.84237	7.75059	8.68109	9.24451	8.98668	8.59014	8.96129	9.229	8.40284	8.997
ENSG00000011422.12_PLAUR	7.15183	7.21392	6.21026	7.61302	8.71621	10.5526	5.85723	8.98825	10.6393	9.25962	8.41431	8.50817	6.68691	7.84098	7.71408	7.32682	7.50656	9.05905	8.35028	7.51319	7.94207	7.18667	7.15676	8.05646	7.32481	4.85129	5.94976	6.94835	8.46039	8.51027	7.49955	8.83197	7.58784	8.17323	7.12047	8.25079	9.2244	8.69274	7.94594	6.91159	6.76915	6.82063	8.29231	8.84493	8.56255	9.13626	7.95776	7.64219
ENSG00000011426.11_ANLN	6.99872	7.19034	7.14673	7.41849	4.24548	6.99639	7.27839	7.24252	5.47982	9.04144	3.07537	6.69972	7.91842	8.13407	6.12851	8.79875	6.0039	8.88871	5.75886	5.20933	7.67532	8.59738	6.29515	8.71506	7.19546	5.35881	7.1961	8.49286	4.50942	8.18491	5.78971	8.46412	4.88696	9.2369	6.28694	6.90439	6.20612	7.61324	7.29192	7.77472	6.09256	7.90607	7.23804	5.63351	7.09617	9.36489	6.0283	8.29693
ENSG00000011451.21_WIZ	8.0528	8.34948	7.66267	9.03688	8.1594	8.58601	8.39472	8.86802	8.10693	8.28441	8.36234	9.08157	8.42802	8.33171	7.59638	8.24671	7.90754	8.10641	8.0426	8.06116	7.82458	8.25284	8.25638	8.6677	7.73518	8.73548	7.93113	8.56922	7.94209	7.99709	7.7374	8.61964	8.00773	8.716	7.77007	9.21552	7.57805	7.53992	8.17616	8.7085	8.08358	8.27091	8.02882	7.8345	7.79791	7.97082	8.13181	8.30521
ENSG00000011454.18_RABGAP1	8.21834	8.54003	8.38667	7.83101	6.93359	7.83286	8.90472	7.75232	8.38406	7.78639	7.29365	7.23742	7.94776	8.07787	8.59705	8.93579	7.80928	9.07594	7.949	8.21282	8.24496	8.34423	9.18098	7.94586	8.62023	10.2867	8.31205	7.79324	8.13268	7.62719	8.15726	7.73422	8.33795	7.84014	7.92932	8.17789	8.43153	8.6898	8.52257	7.79733	8.54169	8.59048	8.13016	7.98436	8.1965	8.45921	7.81925	7.98786
ENSG00000011465.18_DCN	9.31235	7.13548	8.92014	7.57399	3.66261	8.84313	8.91311	8.85188	8.7301	7.6195	10.2107	6.67904	11.6761	6.49934	10.3006	4.14622	10.2005	6.15849	8.1186	9.05681	9.77229	6.78239	12.6548	8.03317	8.67874	11.8191	9.31375	6.62714	8.98829	6.56725	6.70468	7.39134	9.83818	7.75911	11.4229	7.50113	8.09909	7.10724	8.64371	8.41494	10.1602	5.93137	6.68841	7.45529	8.38254	8.00023	10.2461	7.51952
ENSG00000011478.13_QPCTL	6.27689	5.70008	5.33299	6.65415	7.33712	5.96368	5.93757	6.31166	5.42897	5.71285	6.80379	7.10402	5.55504	5.8706	5.26252	5.69934	5.5889	5.37732	5.76997	5.45354	6.01576	5.87353	5.11671	5.99017	4.95275	5.11148	5.19565	6.39258	5.5252	5.8517	4.89055	6.42051	5.10596	6.16626	5.05368	6.40603	5.09755	5.6907	5.74083	6.4949	5.40832	5.70249	5.4255	5.30393	5.54638	5.44587	6.13052	5.84249
ENSG00000011485.15_PPP5C	7.55628	7.68426	7.985	7.78437	7.13017	7.88398	8.18476	8.16377	7.48423	7.98794	7.18447	8.02271	8.16393	7.77198	7.74128	7.53997	7.39965	7.50645	7.61755	7.50404	7.89319	7.44431	7.41911	8.32457	7.86154	7.66402	7.91776	8.01964	7.20487	7.80243	7.36878	8.0403	7.86122	8.50615	7.72618	8.11195	7.67011	8.07831	7.61338	7.84211	7.79601	7.62231	7.36361	7.50937	7.65563	7.63267	7.47965	7.95717
ENSG00000011523.14_CEP68	7.64563	7.5356	7.00375	7.34112	8.02877	7.82286	7.17124	7.83188	6.95553	6.69116	7.6842	7.1043	7.25947	7.58166	6.81408	7.58392	7.51048	6.73843	6.92083	7.44407	6.77609	7.1529	8.38455	7.67556	7.57132	9.41132	7.43548	7.50183	6.76366	6.69573	7.01862	7.15555	7.28464	7.62651	6.98422	7.60035	6.31692	7.44551	7.1768	7.94571	7.68652	7.94995	6.71349	6.75253	7.4702	6.64916	7.39851	7.7248
ENSG00000011566.15_MAP4K3	7.61925	7.72093	7.78102	8.30369	8.03608	8.28157	7.32225	7.9012	7.82288	8.26033	8.03073	7.89801	7.14837	8.26039	7.99447	8.03772	7.50903	7.66146	7.51039	7.66293	7.67239	7.76033	8.03729	7.9517	7.64181	8.72168	7.43807	7.65816	7.81638	7.55317	7.95018	8.27537	7.65602	8.21385	7.86452	7.96342	8.00522	8.35642	7.79267	7.83367	7.59089	7.74009	7.7529	7.75097	7.51294	7.60295	7.17685	7.84054
ENSG00000011600.12_TYROBP	4.15314	4.15065	4.41147	3.49535	3.53029	6.22788	4.21077	4.06368	4.2396	5.63011	4.36948	4.85708	4.96787	4.38718	4.29372	4.39936	6.95298	5.24271	3.57218	6.11185	3.17704	4.48817	5.2152	4.5451	5.06976	5.41935	4.67608	3.76004	4.26442	6.99895	4.75431	6.82807	6.10544	4.58955	5.17526	5.548	4.09193	5.11944	4.10082	3.11902	5.89123	4.05888	5.12503	4.32197	5.86866	5.99322	5.67913	3.68574
ENSG00000011638.11_TMEM159	6.81161	7.12528	7.28547	6.23646	7.23866	5.46621	7.01551	6.40749	7.52597	7.07741	7.73472	7.73371	6.87806	6.73728	6.97795	5.90543	6.66441	6.6858	6.59509	7.59075	6.84471	7.65329	7.61092	6.71829	6.78859	8.37057	6.37208	5.92328	7.59397	5.59751	6.64213	6.38305	5.79192	6.59823	6.79802	6.40901	6.66411	6.95421	6.50217	7.18746	6.70182	6.88978	6.6541	7.0732	6.40797	7.25355	6.39472	7.41738
ENSG00000012048.23_BRCA1	6.69196	7.54849	6.80282	8.56607	8.09794	7.17248	7.31365	7.38038	5.24274	7.32933	5.58033	5.55006	7.00862	7.58804	5.82474	7.95937	6.67782	7.05869	6.29558	6.15591	6.9637	8.08411	6.42982	7.55217	7.23011	6.07404	6.82365	8.19112	4.88117	7.35999	6.20551	7.6438	5.80148	7.96775	6.10857	6.85798	5.99042	6.36377	6.74525	7.37587	6.77569	7.06473	7.00583	6.38775	6.67972	7.64155	6.58178	7.55564
ENSG00000012061.16_ERCC1	7.13532	7.44099	7.58623	8.32522	7.17953	7.86697	7.01822	7.27611	7.09184	7.63423	7.90322	7.55761	7.6945	7.78992	7.01278	8.01084	7.51874	7.7646	7.08568	7.71107	7.04273	7.41626	6.97649	7.98633	7.40041	7.89199	7.34494	7.11211	6.91745	7.68772	7.25131	7.54406	7.31495	8.0389	6.99263	8.07115	7.04541	7.86063	7.4738	7.63202	7.84112	7.58014	7.19635	7.31499	7.24677	7.87915	8.01977	7.73519
ENSG00000012124.17_CD22	3.3115	2.92921	5.78585	3.85043	1.7056	5.94382	5.31052	4.43779	4.54668	3.34788	3.13284	3.49205	3.54746	4.15571	4.54747	3.30893	6.05626	2.92248	7.31155	5.02207	4.95606	4.21276	5.00085	4.91412	4.25758	4.92297	6.35781	3.63052	6.20201	6.45683	5.55203	4.47052	5.79239	3.09541	4.78063	4.38003	6.0597	5.41288	5.08693	1.7056	5.34131	3.19191	5.86114	4.94464	5.47304	4.3019	9.28559	5.16292
ENSG00000012171.20_SEMA3B	8.78741	9.30581	8.26344	11.0381	12.0694	11.8621	9.19913	10.3662	11.0391	9.1	11.1068	11.0106	8.96698	9.06197	9.64776	6.38203	9.73055	7.74348	10.1741	9.38248	9.16604	8.5913	8.97995	8.87612	8.64731	9.42716	8.73756	7.89765	9.97658	9.10693	9.37297	9.55341	9.43213	8.64785	9.27507	10.0185	10.4621	8.87581	9.40763	9.91193	8.99773	7.98876	9.22807	10.3031	7.88828	9.31636	9.57551	9.58812
ENSG00000012174.12_MBTPS2	6.1882	5.7361	6.57511	6.65664	5.26043	5.94669	6.54136	5.46033	5.44085	7.18065	1.7056	5.21615	6.32801	7.00902	5.53384	7.06627	5.43428	7.45656	5.78809	5.70085	6.4441	7.30735	6.81218	7.91455	6.26113	7.53523	6.05785	6.46255	5.91441	5.97766	5.52409	6.11377	5.70438	8.34986	6.34999	6.11786	5.8987	6.47992	5.36565	6.70096	5.84225	6.83768	6.69797	5.56743	6.10774	7.2287	6.2798	6.95453
ENSG00000012211.13_PRICKLE3	5.83841	5.20169	5.49687	7.63051	5.65076	6.50629	5.82102	7.03948	5.50646	6.61518	6.57118	6.92646	5.55395	6.15842	5.58402	6.33474	5.85516	5.81395	5.58836	6.16493	5.67777	6.50178	5.76122	6.45026	5.59922	5.01671	5.47233	6.17755	5.73848	6.03869	5.13607	5.95852	5.08945	6.56934	5.64208	6.36314	5.04637	5.24177	5.82912	6.93681	5.62589	6.29975	5.99031	5.50788	5.65478	5.82987	6.14538	6.26455
ENSG00000012232.9_EXTL3	7.3894	6.71033	6.72931	7.41279	6.82901	7.75609	7.36882	6.98004	6.39268	8.0588	6.75286	7.2614	7.45515	7.73792	6.3481	8.47225	7.20436	7.98118	6.993	6.66024	7.03791	7.85438	7.65869	7.20412	6.89389	9.04414	6.88252	6.6861	6.5446	8.29933	6.58256	8.36458	6.72722	7.44474	6.96501	6.74239	6.91212	7.54382	6.82261	7.64208	6.62211	7.25222	7.30733	6.88577	6.93169	7.64863	6.28691	7.87194
ENSG00000012504.15_NR1H4	6.35309	6.9032	5.27798	1.7056	3.75402	3.70784	3.36667	4.82609	5.85896	3.08141	7.00377	4.57282	7.33082	6.63822	6.99448	1.7056	7.57215	3.10868	7.60061	7.71304	5.12692	3.91905	3.13042	3.42867	4.29308	1.7056	6.77243	2.49811	6.65992	7.60962	8.63557	1.7056	6.6895	3.33343	7.82607	5.53534	8.22334	7.19623	4.98387	1.7056	7.19551	5.18367	6.99219	8.09416	6.1809	1.7056	6.91768	4.81459
ENSG00000012660.14_ELOVL5	5.83837	6.8923	5.63337	6.42367	1.7056	6.0037	5.06155	5.89743	5.93422	7.25385	1.7056	6.3138	6.04994	6.60783	7.30436	7.98049	6.92559	5.54019	6.32569	6.50964	5.90058	8.42623	7.12313	7.06472	6.13424	8.33066	6.66652	7.24211	5.91363	7.35639	5.99057	6.40227	6.68473	7.42797	5.97736	7.06066	5.9278	7.22827	6.5189	6.7356	6.6883	7.40138	7.59095	5.69053	7.18576	5.87017	7.81651	8.08472
ENSG00000012779.11_ALOX5	5.79404	5.19042	6.24734	4.63167	3.5777	9.18221	4.99258	6.52329	5.2338	6.12108	3.9104	5.67503	6.34693	6.89172	5.40133	5.85402	6.27434	6.45282	5.58323	5.74186	5.65128	6.92506	5.03255	7.76637	5.45306	5.29119	7.34651	4.09106	6.27252	8.47052	6.88522	7.82056	6.95558	7.17196	5.3856	6.19289	6.16001	5.25648	5.9653	6.13877	6.55539	7.09177	5.57391	5.88518	6.10175	7.7299	8.06707	5.38621
ENSG00000012817.16_KDM5D	9.14157	9.27306	1.7056	1.7056	7.90803	9.29797	9.11941	8.59241	9.02265	7.80574	8.65596	8.34594	8.6772	8.40022	8.75368	7.69686	1.7056	1.7056	9.40115	8.6325	8.66229	6.43699	1.7056	1.7056	8.59471	9.69999	9.08316	9.56979	1.7056	1.7056	1.7056	1.7056	1.7056	1.7056	8.86585	7.64308	8.84094	9.01433	9.55642	8.33913	9.01615	9.05134	8.40373	9.26613	9.06667	8.4529	9.73554	8.50625
ENSG00000012822.16_CALCOCO1	8.3324	8.03028	7.5801	8.35215	8.19257	9.11207	7.37395	8.00408	8.77099	7.90871	8.9408	8.56877	6.74673	8.76927	8.5452	8.79346	8.30895	8.75042	8.06452	8.52868	6.89093	7.79168	8.90553	8.97401	7.76946	10.2611	8.09188	8.2444	8.76723	7.99051	8.53605	8.44494	8.4857	8.57085	8.13181	9.86901	7.30712	7.98187	8.53241	9.51017	8.64449	8.54238	8.20242	8.31742	8.44591	8.20719	9.10467	8.3821
ENSG00000012963.15_UBR7	7.30331	6.97901	7.82958	5.76729	6.14236	5.945	7.36693	6.19017	6.70297	6.75263	7.0062	5.97566	7.48801	6.94773	7.32827	6.52843	7.23166	6.36061	7.4894	7.25728	7.40722	7.2315	7.46736	6.86461	7.52538	7.2817	7.50596	6.93525	7.50389	7.4158	7.71053	7.20277	7.63241	7.09476	7.49695	6.02253	7.45661	7.53123	7.06497	6.92781	7.497	6.97519	7.4234	6.97684	7.24881	7.34489	6.95494	7.26717
ENSG00000012983.12_MAP4K5	7.27204	7.16967	7.73505	7.45422	8.00761	7.05606	7.29077	7.42279	8.01224	7.37915	6.40502	7.23801	7.25484	7.39037	7.78345	6.98724	7.64768	7.83613	7.36086	7.49477	7.77868	7.43787	7.85195	7.56873	7.42774	8.26797	7.7652	7.36017	7.50956	7.29427	7.39573	7.5705	7.59567	7.60259	7.66061	7.45074	8.17731	7.55847	7.99218	6.66006	7.60694	7.84808	7.67949	7.31745	7.72367	7.15753	7.30482	7.42209
ENSG00000013016.16_EHD3	4.5645	3.57211	4.10474	5.18555	4.99649	5.94769	4.446	5.79969	4.56532	5.56566	5.73694	1.7056	4.69079	4.82263	3.64219	4.64968	5.91818	4.1299	4.26485	5.73741	4.71584	4.25561	5.39418	4.84312	4.40179	6.39792	5.20216	5.36877	4.49765	5.79649	4.07761	5.103	5.89735	4.00851	5.1189	5.52029	5.00347	4.78829	4.79616	4.93522	4.8664	4.70591	4.55444	4.45462	4.76893	5.38386	6.02712	5.06395
ENSG00000013275.8_PSMC4	7.9623	8.05747	8.38082	7.46618	6.01262	7.6982	8.20289	7.71146	8.28887	8.35074	6.93954	8.26559	8.76258	8.04878	7.98261	7.72385	7.82618	8.72617	7.96561	7.94486	8.79803	7.78791	7.59136	8.1956	8.35613	7.7954	8.01299	8.18985	8.01781	8.23936	8.19911	8.15713	8.24513	8.44556	8.48007	7.99725	9.12709	8.53348	8.03807	7.26069	7.75653	7.9729	7.92891	8.00985	8.1365	8.82362	8.07587	7.84333
ENSG00000013288.9_MAN2B2	8.73204	8.45596	8.27177	8.26276	8.77721	7.81553	8.39379	8.0282	8.3972	7.06473	8.1661	7.95194	8.26446	7.88595	8.48755	6.60232	8.52228	7.69297	8.59542	8.0237	8.28589	7.72692	8.21434	7.50359	7.81872	8.14477	8.10425	8.0626	8.36187	7.50346	8.5193	7.61841	8.65121	7.46241	8.17977	7.90546	8.62516	7.86204	8.1805	7.68317	8.2225	8.38623	8.19971	8.309	8.17043	7.88954	8.49489	7.42169
ENSG00000013297.12_CLDN11	3.90691	3.34591	3.58741	3.23148	1.7056	4.54837	5.04733	1.7056	4.36941	3.20504	6.2916	1.7056	5.73936	2.83599	5.36534	4.06446	5.19278	1.7056	4.09627	3.23735	5.36311	3.25092	7.11271	2.80562	3.89654	6.1722	4.87635	2.42742	3.76358	4.05044	3.11809	1.7056	3.38666	2.57062	6.1115	4.65264	3.44448	3.4046	4.33393	2.94406	5.29662	3.34329	2.50489	3.72023	3.79736	2.68659	5.32541	3.59529
ENSG00000013306.16_SLC25A39	8.77726	9.3962	9.01006	10.7635	10.4164	9.44596	9.50891	10.2116	8.28171	9.10056	9.96131	10.3606	9.81851	9.28942	8.60301	9.42509	8.98109	9.30916	9.53043	8.83421	9.1241	9.48685	8.19782	8.66489	8.96166	7.56118	9.06106	10.0005	8.62944	9.10986	8.50442	9.01382	8.37609	8.73306	8.82104	9.71626	8.93553	8.12811	8.85596	9.70814	8.86836	9.11011	9.17947	9.00145	8.65072	8.88058	8.50238	9.71332
ENSG00000013364.19_MVP	11.5073	11.3824	11.5141	11.0029	12.4375	11.1293	11.0919	11.4367	11.8808	10.305	12.5676	12.0216	11.4603	10.7025	11.9001	9.974	11.3257	10.3244	12.371	11.5143	11.5708	10.7171	10.9827	9.98921	11.262	8.7841	11.3183	9.85127	11.7673	10.5932	12.1336	9.96895	11.9505	9.97385	11.5839	10.585	12.405	11.1596	11.1534	11.6734	11.3299	10.4816	11.2123	11.9554	11.2556	10.2533	11.3311	10.332
ENSG00000013374.17_NUB1	8.57783	8.69342	8.86291	8.39226	8.27254	8.41645	8.26005	8.78966	8.63137	8.0635	8.7479	8.05177	7.7042	8.55025	9.20735	7.95581	8.14039	9.0157	8.77661	8.72354	8.88278	8.08206	8.59119	9.04957	8.70979	8.60566	8.05563	7.73367	8.79221	8.46456	8.83238	7.87891	9.1039	9.12382	8.42728	7.65798	9.018	8.95857	8.03256	8.97036	8.525	7.81084	8.63864	9.09818	9.36991	9.16599	8.45382	8.32342
ENSG00000013375.16_PGM3	7.43338	7.07467	7.48371	6.76058	7.42075	7.00641	7.70666	6.9156	7.60399	8.76124	4.94517	6.83773	8.15877	7.63144	7.11286	8.0828	7.01951	9.29315	6.56239	7.7506	7.97561	8.03458	7.24738	7.61866	7.63254	6.76948	7.03932	7.93213	7.31731	8.33111	7.05801	9.07258	6.3588	7.73609	7.47357	7.19006	7.31509	7.75027	7.2867	7.31422	7.35956	7.70277	7.33196	7.07224	7.36855	8.43467	6.87022	7.9393
ENSG00000013392.8_RWDD2A	4.74315	4.85051	3.96971	3.23366	4.66613	4.44837	4.21503	4.55245	4.43799	5.21104	1.7056	1.7056	4.2982	4.64827	4.47473	5.46818	4.69541	6.14008	4.61074	5.10608	4.61054	4.90668	4.96581	5.34879	5.15872	5.90492	3.60145	4.79868	4.31623	4.90623	4.72341	5.3577	4.29304	4.70061	4.7934	4.47076	3.82301	4.57257	4.55838	5.48401	4.5284	4.94703	4.61793	4.92875	4.93437	5.21086	4.20349	5.23922
ENSG00000013441.16_CLK1	7.53799	7.04379	7.07044	6.39325	8.23639	6.87326	7.40867	6.12188	8.87586	8.03072	6.98727	6.05205	6.89129	7.27529	8.07176	7.82082	7.37352	7.66207	7.8884	8.04203	7.10595	7.71514	7.67025	7.30485	7.53538	8.07865	8.05911	7.35162	7.69386	7.21797	7.41048	7.82413	7.77154	7.09211	7.34592	7.60117	7.78893	7.37891	8.36551	6.45871	7.73844	7.52288	7.55542	7.50452	8.1441	7.72956	7.90273	6.48653
ENSG00000013503.10_POLR3B	6.32983	6.12219	6.84496	5.26015	4.99373	6.54193	6.40022	5.87707	5.75874	6.70615	3.92634	5.85192	6.79924	6.0055	5.64857	6.26316	6.07074	6.30576	6.36976	6.11709	6.6224	5.91764	6.20064	6.82024	6.68441	5.81665	6.2956	6.59031	6.10708	6.51779	6.03246	6.65886	5.30851	6.96426	6.35118	5.99117	6.16491	5.62162	6.18708	5.78173	6.59076	6.67923	6.70982	5.75173	6.27417	5.6757	5.44788	6.3987
ENSG00000013523.11_ANGEL1	6.93264	7.22345	6.69801	8.22699	6.83645	8.11892	7.8674	8.52696	6.46969	7.33303	4.50927	6.26976	6.81564	7.68999	6.367	7.83075	6.92913	7.23852	7.11824	6.21212	6.78447	7.87543	7.22492	7.74721	6.91291	7.60279	7.06955	7.5643	6.13826	7.25038	6.82592	7.52199	5.7919	7.7456	6.92788	8.55773	6.59865	7.80532	7.05676	8.18	6.6138	8.05965	7.77251	7.10182	7.3763	7.60307	6.5366	8.54868
ENSG00000013561.18_RNF14	8.24401	7.9931	8.42049	6.82834	7.98003	6.39985	8.35963	7.27593	7.95176	7.80495	8.11379	6.27377	8.2197	7.56258	8.57013	7.79173	8.16513	7.52401	8.4601	8.16271	8.36293	7.83693	8.26183	7.10075	8.26446	8.78187	8.14806	7.34649	7.99278	7.54059	8.13505	6.85146	7.90489	7.02997	8.36134	7.15453	8.37153	8.05342	7.8665	7.29616	8.15357	7.97527	7.90869	8.14204	7.84985	7.66982	7.61162	7.76548
ENSG00000013563.14_DNASE1L1	6.56074	6.40108	6.24607	6.58561	5.64121	6.35853	6.31606	6.45551	6.5905	6.16131	5.93012	6.776	6.41838	6.95015	6.68673	6.12035	6.91561	6.18077	6.73021	6.926	6.67304	6.93898	6.49914	6.83185	6.1504	5.71051	5.96019	5.66645	6.53005	6.16679	6.39804	5.71481	6.7649	6.90995	6.07858	7.14567	6.86088	6.37634	6.55107	7.2788	6.69579	6.53221	6.44326	6.36489	6.30428	6.62179	6.86347	6.79286
ENSG00000013573.17_DDX11	7.24926	7.63791	5.93783	8.70929	8.03969	9.13114	7.17733	9.07598	7.51469	7.81234	7.10924	9.3011	7.35583	8.08905	7.50364	8.93092	7.41892	8.07266	8.09763	7.71629	7.16728	8.78133	7.46127	8.86751	7.84559	6.84932	7.60147	9.01663	7.44452	8.40445	7.29131	9.38759	7.6457	8.7658	7.70809	9.30341	7.04523	8.13084	8.26926	8.52854	8.10676	8.23981	8.21315	7.73045	7.89656	8.28424	8.361	7.91487
ENSG00000013583.10_HEBP1	6.3356	6.88922	6.83837	5.19939	5.71475	5.6512	5.43798	6.09142	7.43956	7.55775	7.75266	6.48726	6.79538	6.68335	7.15453	5.41317	6.76008	6.82617	7.34303	7.33887	6.76329	6.87223	6.82092	7.05836	6.75594	7.23281	6.75899	6.85444	7.87605	7.74374	7.83876	6.06976	7.42706	6.89233	6.79372	5.87288	6.24675	6.27749	6.13385	7.47755	6.71906	6.74167	6.8128	7.04925	5.80202	6.94214	6.88729	7.19809
ENSG00000013588.9_GPRC5A	9.97659	10.3609	10.9396	10.2031	10.6349	10.7681	10.6967	10.4704	12.9299	11.8914	9.54282	9.89401	10.2167	11.386	12.0596	11.048	11.3479	12.6162	10.6284	10.0242	12.3417	11.6024	10.5955	11.0004	10.9637	5.22204	9.87444	11.6213	12.1027	11.1242	11.7008	8.92335	10.6049	11.1999	10.6914	10.3779	12.7519	11.6485	11.0157	10.3563	9.93172	10.9775	10.1918	10.8942	10.4675	11.225	10.2557	10.7839
ENSG00000013725.14_CD6	5.64676	3.81036	4.65089	5.79431	6.88102	6.8927	5.93132	6.03752	4.31368	3.63806	6.04576	7.72959	3.69297	4.82874	5.44088	4.876	5.48895	5.76171	5.24442	5.34113	5.13557	4.50472	4.16322	5.80889	5.35404	4.02405	5.05124	4.67402	5.29957	6.50847	4.83241	3.58223	6.25091	5.30672	4.37402	4.55323	5.1872	4.77187	5.49711	4.21299	5.8445	4.63754	5.73631	6.16293	7.3957	5.53258	6.62106	4.4463
ENSG00000013810.21_TACC3	7.71906	7.31811	7.0231	8.64541	6.50667	8.33524	7.6374	8.36655	6.26121	6.52936	5.64752	8.73754	8.41069	7.84331	6.7861	7.26344	6.58578	7.9434	7.06184	6.22742	7.83346	8.56569	6.76676	8.20035	7.55456	4.97512	8.03211	8.71321	5.47868	8.44731	6.47987	8.68694	6.86478	8.49213	6.97277	7.93777	6.57894	7.10379	7.81338	8.10072	6.66969	8.0261	7.14876	6.39395	7.51624	8.0797	7.76991	7.48857
ENSG00000014123.10_UFL1	7.6547	7.65951	8.30137	6.05811	4.99605	6.41681	7.83805	6.13357	7.45629	8.06074	5.89732	5.57038	7.53137	7.55343	8.06166	7.87864	7.80055	8.72557	7.48168	6.74436	8.13389	8.17086	7.78023	7.68727	7.3485	8.30824	7.47535	7.73753	8.11045	7.71489	8.06485	7.45475	7.86497	7.99226	7.93825	7.09774	8.51563	7.98387	7.4206	7.40514	7.78543	8.13123	7.80655	7.95147	7.62599	8.13457	6.68232	8.18511
ENSG00000014138.9_POLA2	5.84799	6.14026	5.84335	7.19842	5.68099	6.15195	6.57856	6.90022	5.06954	6.46849	6.73636	6.19474	7.26978	6.26705	5.58672	6.33166	4.26041	6.55137	6.29901	5.5006	6.37216	6.99148	5.68505	6.91309	6.44855	5.91951	6.45978	7.52468	5.3299	6.89448	5.05606	6.47641	6.17014	7.32918	6.0351	6.881	5.6803	6.27203	5.79384	6.98755	5.56498	6.63099	5.16921	5.96305	6.42846	7.38598	5.32631	6.61652
ENSG00000014164.7_ZC3H3	7.27525	7.65288	6.90534	7.91293	6.49069	8.67547	6.83017	8.49092	8.65251	7.3032	6.69294	6.96172	7.1745	7.82499	7.81163	7.52803	7.15343	7.48576	7.31547	7.9414	7.24248	7.3674	7.80018	7.21327	7.4084	6.41844	7.74966	7.32868	7.93224	7.964	7.69896	8.0176	7.82592	6.94093	7.58376	9.10434	7.5655	6.84987	8.54981	7.23962	7.71225	7.22126	8.18376	7.9612	7.24919	6.61936	8.13391	6.93638
ENSG00000014216.16_CAPN1	10.6618	10.4553	10.668	10.2975	10.2951	10.2338	10.6325	10.4688	10.6639	10.1932	10.7342	11.1079	10.8987	10.2706	10.8145	10.0775	10.6681	10.3382	10.8633	10.4647	11.0735	9.84711	10.1445	9.68147	10.4281	9.32487	10.5075	10.0041	11.0133	10.2984	10.9628	10.2617	10.6206	9.85035	10.771	10.0926	11.6998	10.4299	10.3527	10.3469	10.4633	10.151	10.5035	11.0209	10.2526	10.1449	10.4789	10.2141
ENSG00000014257.16_ACP3	6.26806	5.41208	5.66786	4.15042	4.63254	4.4319	5.65285	6.19375	4.28469	4.55425	3.94036	5.32011	5.1232	5.15666	5.75004	4.76728	4.71878	6.28511	5.33541	3.52936	7.28442	5.31086	4.70093	4.31412	5.15868	2.97336	5.06618	6.333	3.99395	4.98938	5.07064	6.05136	4.1403	4.16867	5.48026	1.7056	6.3225	4.1717	6.2657	4.37968	4.91406	6.45299	5.60704	5.34822	6.55702	3.81854	3.7638	4.84526
ENSG00000014641.21_MDH1	8.59484	8.34901	9.36347	6.28182	6.23493	6.90154	8.79659	7.3947	7.73345	8.46275	8.25141	7.78613	9.12623	8.26193	8.80671	7.66892	8.74589	8.18616	8.33766	8.39426	8.84011	7.66824	8.4916	7.55356	8.80864	9.7451	8.7748	8.10277	8.60286	8.24611	8.80135	7.77708	8.45603	7.77663	8.98334	6.64609	8.9011	8.14875	7.97079	7.22199	8.60363	8.07893	7.94941	8.43184	8.39665	8.43689	7.83704	8.22097
ENSG00000014824.14_SLC30A9	7.9766	7.78371	8.8395	6.40812	7.73097	7.40596	7.9917	6.40792	7.78566	8.08782	6.97256	7.467	8.19967	7.9792	8.26652	7.09582	8.48794	8.22309	7.63086	8.25111	8.34254	7.93312	8.04037	7.95357	8.2381	7.81025	8.50774	7.9134	8.13682	7.83282	8.25608	7.29054	7.79448	8.42047	8.59327	7.45276	8.84785	7.90054	7.83172	6.68619	8.09556	8.65544	8.24124	7.79755	8.19975	8.3174	7.73766	7.64999
ENSG00000014914.21_MTMR11	9.86822	9.7234	9.35001	8.13046	9.61105	8.64456	8.62911	9.07064	10.6572	7.77208	10.3779	9.61601	9.41312	9.15953	10.0003	8.76374	9.34193	9.38135	10.6855	10.2168	9.45764	8.32018	9.25013	9.19275	9.34404	7.0563	9.60578	8.1777	10.4867	8.34162	10.4742	6.6345	10.2647	9.04296	9.34711	10.0688	10.5224	9.75355	10.0885	8.4437	10.2921	8.7334	9.48627	10.3833	9.76017	8.38097	10.9804	8.31112
ENSG00000014919.13_COX15	8.17053	8.1003	8.10182	7.83034	7.92649	7.24214	8.20682	6.66684	7.43355	7.96441	7.73688	7.71788	7.83469	7.68852	8.00207	7.79691	7.87861	8.19035	8.0049	8.25673	8.01288	7.8999	7.74144	8.44339	8.06571	7.81862	7.75657	8.17101	8.1809	7.63684	8.40567	7.10664	7.23839	8.44581	8.04605	6.63103	8.06025	7.6523	7.52115	8.23212	8.07147	7.86736	7.72581	8.26515	7.94929	8.26353	6.93197	7.89913
ENSG00000015133.19_CCDC88C	9.06199	8.96899	8.43622	8.62153	9.42488	9.05009	8.76108	9.82915	8.93498	7.98874	9.10609	9.39255	8.95354	8.70478	9.29019	7.98026	9.0236	8.45663	9.59945	8.875	9.06475	8.11332	8.7164	8.7935	8.70822	5.36045	9.03011	8.53549	9.50083	9.10889	9.5328	8.76683	9.65566	8.59433	9.03737	8.82522	9.86482	8.84931	9.00383	8.03271	9.14094	8.54005	8.89753	9.40332	9.40951	8.5145	9.47938	8.42004
ENSG00000015153.15_YAF2	6.4201	6.49294	6.74773	7.28847	8.76371	6.61856	6.46692	6.514	6.6511	7.45142	6.56954	6.67337	5.9969	6.5091	6.57869	7.12095	6.94481	7.2699	6.5973	6.86072	6.80647	6.7878	6.76026	7.3818	6.3778	6.77582	6.99392	6.67626	6.79903	6.99967	6.68854	6.48985	6.14012	7.46285	6.45996	6.44196	6.39561	6.29257	6.48741	6.91383	6.55227	6.68463	6.9959	6.40777	6.89728	6.8842	6.989	6.34886
ENSG00000015171.20_ZMYND11	7.9256	8.1847	8.27663	6.31718	4.64961	7.57897	8.11483	6.87355	7.57698	8.33394	6.82152	7.46376	8.21977	8.00192	7.98658	7.86574	8.40532	7.90615	7.66211	8.35515	8.06409	8.152	9.02414	8.28119	8.25456	10.1459	8.20777	8.10909	7.51521	8.25816	7.61495	8.10338	7.86708	8.37291	8.4819	7.51043	8.21283	8.23285	7.93975	7.01481	8.22379	8.50518	7.86087	7.42086	8.12927	8.19444	7.87534	7.96993
ENSG00000015285.11_WAS	4.61384	4.07143	4.30135	3.53222	1.7056	6.69479	3.77334	4.34836	4.88781	4.01297	5.55057	4.00424	4.25628	5.11328	4.47666	4.3531	6.14897	4.94774	4.88531	4.64128	4.02717	3.9772	4.18273	4.73816	4.64714	4.17838	5.24356	3.72355	5.26771	6.40371	4.35038	5.48794	5.89637	4.67378	4.46795	4.46901	4.74305	4.92326	4.92556	3.58171	5.43919	3.54067	4.68188	4.8793	6.07949	4.99162	7.16333	3.68261
ENSG00000015413.9_DPEP1	1.7056	9.11187	3.52397	8.93107	4.99398	9.5454	2.41171	6.7508	4.30043	10.6746	3.06756	5.20199	3.61484	8.83369	4.30007	8.88334	5.78824	2.98916	3.24516	5.05579	2.76802	6.94676	2.85135	5.20412	2.38337	1.7056	2.77353	9.43463	4.71526	7.23672	4.41488	6.8475	2.92774	5.24717	5.39654	9.08753	3.55692	8.95044	2.71933	8.99388	4.71502	9.71274	10.5599	8.80781	2.42198	2.28071	4.20372	9.66407
ENSG00000015475.19_BID	5.86459	6.18526	6.45196	6.00287	4.80741	6.69563	6.88143	6.9287	5.19818	7.04779	5.37375	5.91116	6.89443	6.90252	5.53857	6.64722	6.2217	7.02033	6.10004	6.53433	6.64672	6.41648	6.01515	6.78923	6.40492	5.32918	5.6638	6.83955	5.77844	6.93748	5.59535	6.63441	5.93205	6.61573	6.21362	5.56067	5.74747	5.58765	5.59004	6.93879	6.12935	5.98995	6.44638	5.91757	6.04073	6.88487	6.11059	6.86693
ENSG00000015479.20_MATR3	9.25611	9.37239	9.9035	8.34343	5.47248	8.83362	9.22164	7.80183	8.68532	10.0923	7.97284	8.10128	9.49217	9.39974	9.27218	9.72168	9.31838	9.70692	8.78147	9.38449	9.12806	9.83455	9.64064	9.54871	9.55353	10.4634	9.5006	9.43783	9.19287	9.4085	9.00078	9.16499	9.02376	9.72461	9.52649	8.7233	9.21534	9.57287	8.96584	8.78383	9.43618	9.48286	9.37302	9.04614	9.47326	10.0029	9.10047	9.62611
ENSG00000015532.10_XYLT2	6.97781	7.31432	6.78904	8.62191	8.20185	7.64261	8.60415	8.55511	6.73725	7.77244	8.22665	7.12518	6.92475	7.48061	6.72083	7.83838	6.73185	7.11188	7.00223	6.77476	6.79652	7.26448	7.13499	7.45015	6.72823	7.66867	6.58491	7.3079	6.38492	6.93765	6.188	7.55359	6.62786	7.40229	6.4292	7.85366	6.19293	6.39814	7.06801	7.60952	6.64545	7.36779	7.3825	6.73932	6.71779	6.87238	7.26441	7.68303
ENSG00000015568.13_RGPD5	8.13803	7.97454	8.07528	8.18541	1.7056	8.52204	7.78132	6.39058	8.9046	8.64415	6.347	7.06537	7.12241	8.48021	8.17428	7.00536	7.3559	8.49686	9.06403	8.18632	8.61189	8.1496	8.45984	8.2424	8.226	8.76573	8.21389	9.04131	7.37582	8.75721	7.80795	9.30755	6.93686	8.77664	7.59188	9.54318	7.3476	8.05596	9.20765	7.89912	8.39211	8.41634	7.02252	8.20949	7.45496	7.85383	8.36798	8.23306
ENSG00000015676.18_NUDCD3	8.47173	8.55624	8.19728	9.45111	8.30195	8.57228	8.84731	9.20858	7.79856	8.56908	8.39171	9.11571	8.47528	8.96713	8.04686	8.73683	7.89223	8.21239	8.27366	8.23797	8.20832	8.88845	8.45275	9.28222	8.21581	9.28945	8.1271	8.76459	7.84044	8.20136	7.98451	8.37878	8.22922	9.17311	8.09121	9.24484	7.78753	8.26798	8.22541	9.97212	8.09521	8.59632	8.6504	7.92019	8.12963	8.27397	8.242	8.87438
ENSG00000016391.11_CHDH	8.20654	8.8065	8.31326	9.24584	9.41498	8.81486	9.01264	8.12974	8.58512	8.16061	8.60424	8.78425	8.43247	9.28281	8.77532	8.30855	7.78397	8.45861	8.6739	8.82124	8.47414	9.35935	8.52183	9.30055	8.95422	4.84204	8.74057	9.54541	7.84048	8.73889	9.52997	9.4658	8.87592	9.33236	7.90301	9.13235	7.93841	8.54671	7.8831	8.89389	8.83442	9.02644	8.14478	7.88627	7.80773	9.12912	9.5209	9.00093
ENSG00000016402.14_IL20RA	6.183	7.00338	4.89768	6.80661	9.2316	6.46104	7.21557	5.64056	4.99549	8.10505	6.7894	7.14989	6.48415	6.40337	4.61052	7.87307	5.59159	6.598	6.62738	6.26069	6.61528	5.39077	5.10644	7.79772	4.36123	4.03002	5.30468	7.89747	5.63075	5.14943	4.95199	5.18937	5.11681	7.96503	6.21346	7.14069	6.22386	6.67265	4.67236	6.48458	5.32714	7.0606	5.17181	5.52513	6.45823	7.69258	4.78832	7.65696
ENSG00000016490.16_CLCA1	8.59004	7.68309	11.7795	3.78436	7.27122	6.41612	9.84137	7.32296	6.87175	7.71245	5.73768	6.87037	11.3231	8.49271	6.3346	4.35726	9.35057	5.76154	7.1826	10.7211	9.05099	2.42336	5.75657	5.94288	7.35254	3.55025	7.82217	7.03276	6.97758	10.799	7.47286	1.7056	6.77363	4.70465	9.71892	3.30007	8.26478	8.97427	6.93679	5.25866	7.26636	11.2263	7.47787	6.37641	8.26841	3.26332	8.22519	7.81595
ENSG00000016602.9_CLCA4	12.0812	12.5439	12.5958	7.87622	12.0694	8.37282	8.50199	8.30503	13.6996	7.20618	12.771	11.0868	9.32716	10.5158	14.7896	1.7056	9.63826	4.1315	12.9684	11.0727	13.1245	8.37534	11.9031	7.54082	12.6008	4.12769	12.4757	8.60472	14.1454	9.53993	14.3058	3.61216	12.5747	6.11095	12.8085	4.88849	13.7705	11.4493	11.9163	8.98945	12.0867	4.54941	12.9404	13.0414	13.0297	6.19412	12.4101	7.33245
ENSG00000016864.19_GLT8D1	5.73436	6.34646	6.60201	5.56369	1.7056	5.27094	6.52486	5.59852	4.97872	6.2973	4.75684	3.95694	6.36092	5.90016	5.56179	5.4781	5.68802	6.17164	5.6796	5.51063	6.33294	6.32536	6.24247	6.76124	5.77494	6.91139	5.73499	5.9017	5.50819	6.61326	5.90496	6.13736	5.32696	6.998	6.27109	5.19251	5.46804	5.63818	6.06963	5.79895	6.22669	6.37403	6.17488	5.51493	6.4533	6.58104	5.84677	6.14931
ENSG00000017260.20_ATP2C1	8.65841	8.81611	9.02987	9.02622	8.62029	8.42545	8.94295	8.81786	8.95674	8.42308	7.8103	7.77872	9.06165	8.66211	8.38721	8.82393	8.41096	8.95166	8.27431	7.91276	9.14558	8.70585	8.78631	9.10049	8.79921	8.82252	8.26467	9.00235	8.33628	9.01921	8.51553	8.72718	8.02457	9.1362	8.44568	7.80081	8.73347	8.41608	8.51041	8.25244	8.18895	9.12086	8.43053	8.59914	8.52305	8.93334	7.55129	9.02564
ENSG00000017427.17_IGF1	4.69411	5.12373	4.73202	4.25163	1.7056	6.96773	5.66034	1.7056	4.63204	4.29946	6.11066	1.7056	6.21132	5.53153	5.88174	4.04075	8.25056	3.15639	4.44674	7.41868	4.88658	4.12886	6.78754	5.12992	5.29029	6.25801	5.91994	3.09914	4.84098	5.60897	5.6253	4.82893	7.12847	3.18077	6.74554	4.70058	5.2636	5.29385	5.21128	3.34677	6.20683	2.95874	4.80908	4.89633	5.68809	4.32701	7.45497	3.08737
ENSG00000017483.15_SLC38A5	5.81332	6.31933	6.3267	7.27658	5.86343	7.13054	6.63548	6.11047	5.11023	8.39335	5.83047	7.83618	7.18725	7.0869	5.28803	7.72948	5.57485	8.02215	4.4935	4.7496	7.03961	7.70603	5.34043	9.24875	6.51519	3.55817	5.39375	2.93801	3.67243	6.24494	5.03398	6.51903	4.96522	9.35236	6.05516	10.256	5.41892	4.64051	5.45162	4.50881	5.72792	3.63714	5.59058	5.45915	5.92427	8.20309	5.22002	8.06117
ENSG00000017797.13_RALBP1	8.62798	8.72994	9.08228	8.02363	8.79038	8.69294	9.25457	8.21384	8.91081	8.66671	9.2958	9.11356	8.74816	8.78604	9.33974	9.9287	8.93973	8.95703	8.89327	8.77938	9.08353	8.46776	9.01035	8.61752	8.87953	9.36045	8.81688	8.90434	9.39147	8.44744	9.00604	8.41828	8.67885	8.73554	8.87344	7.85718	8.77323	8.53692	8.35793	8.00502	8.51108	8.528	8.33916	8.81409	8.47567	8.99785	8.67271	8.50182
ENSG00000018189.13_RUFY3	7.53959	7.23009	6.70096	8.08436	9.82109	8.68766	7.27266	9.08969	7.50582	7.68815	9.29928	9.89371	6.94293	7.5438	7.36632	7.3104	7.46747	7.16501	7.87517	7.9352	6.58192	7.311	7.66511	7.31398	7.14231	8.19001	7.28373	7.39738	7.5671	7.73154	7.31441	7.74818	8.0532	7.0349	7.52602	8.18308	7.13494	7.50706	7.90261	8.35019	7.91597	7.75088	7.30533	7.65902	7.82404	6.89925	8.31474	7.28653
ENSG00000018280.17_SLC11A1	4.05251	3.5715	3.02991	4.32457	5.26237	9.27058	4.08246	6.54465	4.05641	4.66434	3.92774	1.7056	4.4168	4.92696	3.41088	6.15956	4.61861	5.62386	3.40825	2.61658	3.37731	4.25662	3.68474	5.46231	3.32157	4.12774	3.91578	3.51502	3.94598	6.01521	3.40511	8.9616	4.62458	5.23223	3.82064	6.53789	3.44357	3.93763	3.25961	2.94604	3.53767	3.78152	4.34797	4.17593	4.36818	5.73635	3.87892	4.17924
ENSG00000018408.15_WWTR1	6.07069	6.06883	5.92112	6.49875	4.99038	7.73243	6.84032	6.39941	6.89806	6.39671	6.3981	6.1916	7.38507	6.03334	6.66261	8.45261	8.62159	9.61266	5.15531	7.87652	6.66117	6.21234	9.63386	5.86935	6.52542	11.6237	7.4059	6.63175	5.84276	7.65139	5.78412	7.44742	7.18657	5.67836	7.5044	6.66193	5.62846	6.99758	6.8337	5.7794	7.31024	5.46085	6.09934	5.79725	6.36416	8.16906	7.37809	6.18403
ENSG00000018510.18_AGPS	8.01729	8.1033	8.81651	9.60804	11.6291	8.66275	7.97853	9.49467	7.21981	8.24958	10.4109	9.61991	8.92755	8.13765	7.56298	7.48495	8.53826	7.94675	8.68685	8.69647	8.49795	7.78644	7.72855	7.65272	8.15527	8.2379	8.34856	8.07132	7.8496	8.03348	8.22891	8.12268	8.37945	7.82572	8.67841	8.30903	8.78611	8.13504	7.99832	8.88302	7.87333	8.3162	7.73725	7.95066	8.16489	7.74316	7.37257	7.93614
ENSG00000018610.15_STEEP1	6.00825	6.79605	6.70187	7.52016	8.46454	6.09833	6.47229	6.93007	6.1285	6.48767	8.46695	8.69563	6.55586	6.74743	7.2328	6.70851	6.57562	6.98757	6.98971	6.81866	6.25246	6.69673	6.30342	7.15454	6.09927	7.00116	6.5334	6.89545	7.16463	6.38949	7.2404	5.25756	6.48031	7.19291	6.91989	6.97847	6.9178	6.41276	5.83407	8.02984	6.00745	5.93628	6.84971	7.11694	6.28963	6.59512	6.10301	6.952
ENSG00000018625.15_ATP1A2	5.60832	5.63884	3.75144	1.7056	4.15736	5.21008	4.19717	1.7056	5.43976	2.90238	6.2552	1.7056	5.22364	3.45143	5.80775	2.71882	6.38216	1.7056	3.57325	5.36083	4.10566	2.87911	9.09038	2.57758	4.32099	10.8621	6.383	3.2073	4.17159	2.87906	3.92766	3.01819	5.07613	2.53721	6.28333	1.7056	4.37451	3.59443	5.07807	2.80068	6.03652	2.57926	3.62071	4.65215	5.29845	2.65036	4.66521	2.35115
ENSG00000018699.13_TTC27	5.74904	6.0904	6.3576	6.25646	3.59248	6.21248	6.82108	5.93781	5.68025	7.11574	5.45373	5.39902	6.8438	6.72057	5.48053	6.86656	5.85282	7.18839	5.70472	5.91036	6.35179	6.31469	6.33911	6.54381	6.49854	6.4286	6.47599	6.93463	5.16379	6.57272	5.38549	6.46182	6.03994	6.34459	6.32742	6.70906	5.44806	5.62643	5.97799	6.28481	5.96427	6.63236	6.12998	5.77745	6.09289	6.16314	5.85788	6.70759
ENSG00000019102.12_VSIG2	8.9191	8.79417	9.9911	6.85726	11.6215	6.39194	9.91318	9.19496	9.8732	6.60364	9.66958	9.27472	8.29535	7.88133	8.82114	4.74433	8.68304	3.94895	9.82425	8.68161	9.58798	6.30987	8.89851	4.45296	8.9076	3.17097	8.29315	4.39393	9.86029	3.61695	9.06186	4.02685	8.10954	3.63547	8.15488	1.7056	9.73636	8.65503	8.93998	7.04142	8.63195	8.39248	7.97928	9.31598	7.78348	4.03581	8.36553	5.8678
ENSG00000019144.19_PHLDB1	8.53642	8.11296	8.26548	8.2164	9.24317	9.35682	8.58846	9.11684	8.72461	7.67604	9.99156	9.45025	8.18374	8.10297	8.84968	8.36824	8.64845	6.50092	8.75447	8.86302	8.29365	7.20529	9.16393	8.41011	8.35606	9.52072	8.51866	6.82668	9.12714	7.41747	8.69065	8.57889	8.87507	8.03762	8.82832	7.9896	8.24067	7.64801	9.23273	8.46201	9.02619	7.61971	7.65316	8.62506	8.35274	6.41557	9.19791	7.14151
ENSG00000019485.14_PRDM11	5.76044	6.11711	5.6101	7.19378	6.27516	6.17166	6.52543	5.36263	6.09246	6.93964	5.68133	7.28125	6.71902	6.19362	5.17351	6.13167	6.7733	5.18761	6.07888	6.11005	5.83187	6.41857	7.02047	7.84333	6.17329	7.93175	5.72083	7.48207	5.89955	5.99379	5.70812	7.04736	6.04223	7.34321	6.31878	7.20381	5.47143	6.28288	6.7176	7.36136	6.02632	6.34014	5.69117	6.07119	5.75052	6.23671	7.29827	6.33518
ENSG00000019505.8_SYT13	7.60981	7.10056	8.29941	4.46828	6.49265	7.00335	8.31509	6.30418	6.20662	7.48937	6.97207	6.63366	8.4001	7.28774	6.91368	9.5001	6.56777	8.87884	6.20313	6.55052	7.44151	7.90931	7.05633	9.15881	7.89337	5.33466	7.18412	7.82553	6.4048	8.09385	7.02095	8.96604	6.06732	9.82446	7.37926	3.8675	6.29833	8.63563	6.99955	8.34604	6.95981	5.83162	5.56366	6.30927	7.64873	9.12022	5.61809	7.2481
ENSG00000019549.13_SNAI2	4.97563	3.56983	4.96383	3.77886	1.7056	5.45917	5.41566	5.24582	5.1106	5.10746	1.7056	4.73148	5.79755	4.64647	5.42492	3.31769	6.27788	3.64613	4.00333	7.35713	5.54694	4.25938	7.07664	4.50058	5.27907	6.15975	5.61668	3.81753	4.4414	5.2918	5.01954	5.71164	5.98412	4.48515	7.46105	4.65202	5.20134	5.03867	3.72557	3.87839	6.54856	4.22188	4.9953	4.01017	4.93766	4.75685	5.98402	4.17744
ENSG00000019582.16_CD74	10.4802	9.43244	10.403	9.85161	5.52932	9.96571	10.1889	9.41654	9.77436	9.91984	8.87371	8.23343	9.78652	10.6269	9.91565	9.5389	12.0518	13.3014	10.2496	10.8908	9.07729	11.1061	10.3644	11.5127	10.2186	10.5674	9.83637	9.21339	10.0301	12.8078	9.62015	10.7595	11.6587	11.2273	10.1118	9.13781	10.3734	10.828	9.70233	8.80354	10.8614	11.4771	10.6329	10.0214	13.0631	13.7466	12.2425	10.1845
ENSG00000019995.6_ZRANB1	6.78668	6.74788	6.81461	6.5694	6.14424	6.81391	7.25695	7.10071	6.82052	6.91443	6.10999	6.55741	6.51241	6.82005	6.81869	6.84599	7.36537	7.25081	7.0652	7.29375	6.74399	6.98007	7.81166	7.60604	7.0349	8.94359	7.03883	7.16349	7.15188	6.91275	7.12067	7.14521	6.83535	7.74137	6.97022	6.68995	6.87703	6.90128	7.0087	7.05037	6.69274	6.95747	7.188	6.75936	7.04834	7.05777	7.35267	6.93806
ENSG00000020129.16_NCDN	5.88505	5.97682	5.96897	7.89372	5.88163	7.14433	6.81043	6.89607	5.78093	6.07932	6.81098	6.64672	6.04005	6.04942	6.00435	7.19836	5.70712	6.52449	5.43335	5.57869	6.63096	6.15813	6.89911	6.66543	6.05196	7.99448	5.88676	6.94905	5.95522	6.9064	5.3853	6.75122	5.76555	6.24907	5.76094	7.33238	5.76345	6.40001	6.18039	6.54542	5.78528	6.4581	6.41681	6.01773	6.20096	6.26681	5.97643	6.72108
ENSG00000020181.18_ADGRA2	6.88681	5.64424	6.37915	7.8411	7.00301	8.91615	7.1373	8.44465	7.21592	7.19963	7.83438	8.22836	8.07052	6.56524	6.4423	5.96006	7.52354	6.12488	5.52072	7.22465	6.50145	6.66252	8.87474	8.71416	6.06025	10.3841	7.25219	6.36175	5.74346	7.32961	5.37929	7.96516	7.28292	8.51673	7.92207	7.25348	5.73594	5.60311	7.11914	7.16729	7.17977	5.80839	6.16324	6.25255	6.48707	7.00596	6.82092	6.89002
ENSG00000020256.20_ZFP64	7.38783	7.8826	6.71882	7.42714	7.31246	6.85527	6.39489	7.1799	6.62697	7.79279	6.2979	6.72261	6.89726	7.5757	7.26196	7.25989	6.9977	7.14194	7.18941	7.12626	7.12943	7.59179	7.00942	7.25771	7.11605	6.55224	6.91511	7.80773	7.10854	7.00966	6.93614	6.93845	7.40403	7.56865	7.15096	8.63544	6.95633	7.17367	7.16915	7.44351	7.00876	6.90025	7.193	7.0057	6.83891	7.21355	7.98977	7.46998
ENSG00000020426.11_MNAT1	5.33302	5.14331	5.2042	6.1401	1.7056	4.51427	5.81096	4.66284	4.67951	5.4181	4.87946	3.96198	5.10609	4.76733	4.84193	5.94932	5.64545	6.09458	4.83604	4.83524	4.97636	5.21303	5.59404	5.02478	4.70131	6.29638	5.3536	5.85743	4.42455	5.48702	4.76781	5.22009	4.59242	4.69557	4.52088	5.05481	4.3759	5.18951	4.96219	5.36305	5.04089	5.67744	5.64593	5.26728	4.6996	5.64925	4.07743	5.91536
ENSG00000020577.14_SAMD4A	5.76107	5.86111	5.57783	7.2585	5.18842	7.25419	6.48727	6.68152	7.02116	6.07241	6.24033	7.28476	5.74479	6.19606	6.70082	7.55151	7.33318	7.44538	5.74214	6.50952	5.5354	6.49246	8.61032	6.44044	6.22418	10.3325	6.72605	5.5973	6.32357	7.50175	5.90427	7.25359	6.73849	6.30831	6.3362	8.47965	6.35425	5.20333	6.84708	5.54068	6.15472	6.27918	5.43649	5.27034	6.202	6.39796	7.55245	6.72384
ENSG00000020633.19_RUNX3	5.68917	4.56449	5.79398	5.09485	5.25594	6.17765	5.48195	5.63177	6.17028	6.02348	4.20194	5.7684	5.04007	5.872	5.56775	6.70499	6.89005	6.58357	5.45211	5.35407	5.71415	5.21969	4.69037	6.9874	5.82081	3.69664	5.60572	6.54716	6.34682	7.34004	5.34797	5.5073	6.81827	7.08988	4.94899	7.51383	5.66835	5.61658	5.73774	6.87627	6.12316	4.90314	5.78829	5.99857	7.37029	5.91934	7.50745	5.01667
ENSG00000020922.13_MRE11	7.05781	7.53278	6.94925	7.37992	7.41975	6.68444	6.84178	5.6954	6.46399	7.40644	5.73175	5.82636	7.1109	7.63004	6.15691	8.1631	7.22102	6.93811	6.73399	6.56219	6.84738	7.55856	7.23882	7.85465	7.64259	7.65367	7.50644	8.21799	6.78897	7.22198	6.47996	7.34382	7.03927	7.80039	6.94458	8.21447	6.72066	7.37448	6.8262	7.12411	7.02814	7.64402	7.22385	6.53955	7.83149	7.30162	7.17444	7.75441
ENSG00000021300.14_PLEKHB1	4.71619	4.55906	5.42378	6.00357	4.22621	4.91549	5.17997	5.56682	5.40804	6.99446	4.40899	6.70012	6.41995	6.97067	5.40545	9.54476	5.88355	6.75653	4.31273	6.07511	5.39715	7.57304	6.35942	4.07775	5.91261	7.91753	5.90674	6.01531	4.90548	6.73226	5.29314	7.57598	5.13667	4.30107	5.92723	4.53573	5.04549	7.54714	4.41356	7.0735	5.88551	7.33406	6.62525	5.65586	5.18839	5.18262	5.08532	6.45188
ENSG00000021355.13_SERPINB1	9.33001	9.25762	9.92477	7.51017	8.76948	9.22451	9.43646	8.86272	10.0351	9.88266	8.3181	7.72328	10.1729	9.62766	9.99389	10.1343	9.86691	9.97122	9.91982	9.80938	10.1926	9.18688	8.8113	9.0221	9.32101	7.28709	9.81844	9.38419	9.74041	9.90168	10.074	9.17975	9.62609	9.45131	9.85868	7.48671	11.6036	10.2992	9.95815	8.60862	9.65644	9.89985	9.86151	9.69351	9.77097	9.32844	8.61117	9.21958
ENSG00000021574.13_SPAST	7.20741	7.51229	7.71301	6.41546	6.70817	6.17745	7.18809	6.96359	6.80196	7.86108	6.383	5.72412	7.2491	7.31144	7.47111	7.32636	7.08691	7.58222	7.20822	6.79554	7.14005	7.28372	6.91259	7.39671	6.96935	7.37312	7.16626	7.38744	7.44741	7.11425	6.99595	6.9178	7.07447	7.64168	7.15755	6.69988	7.30687	6.88963	6.53192	7.34362	6.75691	7.34883	6.97418	6.78353	6.92732	7.09443	6.61367	7.65376
ENSG00000021645.20_NRXN3	4.03148	3.82927	4.28136	3.04879	1.7056	6.04609	4.39301	3.50547	5.28484	7.29493	5.72859	1.7056	4.5343	3.5191	4.33678	5.9315	5.1958	3.18902	3.30286	3.8933	4.38725	3.47635	7.32358	3.96925	4.80657	9.26633	5.11556	6.60908	3.12212	3.48719	4.8792	3.53574	4.9114	4.04084	5.34443	5.87322	4.87978	3.98589	5.82817	3.74872	5.36982	7.05796	6.5334	4.6168	4.4465	3.66525	5.23301	3.18404
ENSG00000021762.20_OSBPL5	7.85659	7.87074	7.44423	8.46133	7.12704	8.02056	7.94199	8.86587	8.54907	7.87165	8.67851	8.33695	8.58378	7.72621	7.94132	8.44914	7.86537	7.11389	8.02335	8.21918	8.32802	8.0574	8.17764	8.04258	7.81483	8.69813	8.08215	8.18849	7.04034	6.81653	8.26859	9.28761	8.29897	7.98257	8.28624	8.92953	8.68734	7.91804	7.04906	6.57501	8.61188	8.36689	7.62659	7.99502	7.43407	7.22176	7.9673	7.92101
ENSG00000021776.11_AQR	8.34841	7.9987	8.63394	7.71558	5.26505	7.87582	8.06855	6.13861	7.74702	8.04609	7.4061	6.30102	8.40009	7.89918	8.05595	7.90218	7.99302	8.21528	8.00253	8.16539	8.42842	9.5743	8.22658	8.63344	8.5854	8.37087	8.23267	7.83171	8.11385	8.28691	8.17364	8.13561	7.95452	8.66484	8.36163	8.06458	8.28254	9.01772	8.05962	6.74231	8.44469	8.52993	8.26933	7.87521	8.36416	8.70733	8.03201	7.51577
ENSG00000022267.19_FHL1	6.64414	6.00105	6.4767	5.18711	1.7056	6.65459	7.15581	5.67417	6.91329	5.80337	7.17531	4.57137	7.75615	5.82386	6.91217	3.99105	8.73936	3.97635	5.44	8.09756	6.34123	5.35848	10.5406	4.96693	5.82399	12.5465	7.79617	4.91533	6.26504	6.45331	6.08075	4.97947	7.01635	4.36354	8.19342	5.76329	5.51582	6.01017	6.93575	5.13562	7.56141	5.09462	5.58708	6.14428	6.53866	4.90057	7.38775	4.23997
ENSG00000022277.13_RTF2	7.73488	8.62169	8.32308	8.59903	7.12724	7.71682	7.93801	7.476	7.8582	8.7929	8.30745	8.25127	8.08856	7.92719	8.20509	7.95732	8.22059	7.61923	7.8441	8.11064	8.12717	8.77636	7.87502	8.35087	7.89303	8.68603	8.06438	7.99609	8.16107	8.08426	8.26059	7.15665	7.96996	8.41727	8.14453	8.71082	8.44746	8.14341	7.58389	8.75877	7.94562	7.75183	8.35313	8.20041	7.67593	7.60103	7.79044	9.01566
ENSG00000022556.16_NLRP2	5.7907	5.71103	6.47923	7.74048	5.86929	4.35075	6.11149	5.56723	3.03544	1.7056	6.57412	5.4183	4.96863	2.52161	3.61465	7.59246	1.7056	3.47281	5.95002	5.42883	7.41723	2.71743	6.34578	4.17567	5.6845	2.92576	1.7056	1.7056	5.65707	6.38361	6.68134	2.78417	6.69682	3.77498	5.30887	3.88213	6.76157	5.31363	4.6248	2.60267	5.69934	4.63782	2.82923	5.22482	6.02727	7.73051	6.18173	3.02109
ENSG00000022567.10_SLC45A4	7.60759	8.14848	7.84648	9.78568	9.29074	10.2173	8.02875	9.16237	9.38879	7.75636	9.09588	8.14586	7.75497	8.20562	7.86352	8.35554	7.77148	8.64584	8.17992	7.95219	8.27697	7.87926	7.69232	7.96988	7.52436	7.93589	7.37896	7.93218	8.51296	8.02357	8.4535	9.34838	8.63912	8.05323	7.66634	9.91636	8.52489	7.7136	8.2198	8.58417	7.46122	7.79444	8.15917	8.56997	8.03186	9.11216	8.13223	8.13721
ENSG00000022840.17_RNF10	9.59146	9.35522	9.74874	8.67918	9.92639	9.00463	9.19148	8.93728	9.92774	9.35076	9.46592	8.98237	9.42205	9.08382	9.99675	8.66955	9.62589	9.25935	9.88245	9.63757	9.79393	9.19868	9.63862	9.25559	9.60495	9.52307	9.5102	8.92146	10.0196	9.51428	10.0092	9.05004	9.53146	9.33831	9.69992	8.96959	10.1448	9.24493	9.7354	9.05195	9.42378	9.07143	9.4934	9.55898	9.42418	9.00851	9.54983	8.84274
ENSG00000022976.16_ZNF839	6.52809	6.0798	5.97587	6.20626	7.37089	6.89044	6.47548	6.55493	6.57427	5.3155	6.27965	7.00581	6.28547	6.10413	6.00401	5.87991	6.24145	6.00356	6.24823	5.99199	5.68803	5.72415	6.27441	6.90827	5.89667	6.21863	6.40103	6.36446	6.19576	5.8357	6.33954	6.58806	6.24071	6.53784	6.14174	6.76252	5.89846	5.91808	6.24261	5.68934	6.62692	6.45001	5.95147	5.71558	6.02056	6.117	6.05242	5.78099
ENSG00000023041.12_ZDHHC6	7.52364	7.59289	7.98543	7.67783	8.09035	7.1203	7.82886	7.76144	7.94245	8.12036	7.23363	6.36681	7.62268	7.40222	7.83184	7.84487	7.59277	7.38438	7.71136	6.93878	7.93526	8.02597	7.4666	8.20191	7.74861	7.3897	7.75936	7.53228	7.93406	7.43426	7.84396	7.24507	7.47379	8.38766	7.74596	7.5404	7.96811	7.76963	7.73374	7.11393	7.69622	8.07412	7.68165	7.80665	7.92548	7.34126	7.63651	7.9138
ENSG00000023171.19_GRAMD1B	4.42166	4.19984	4.1963	4.03251	4.3156	6.96767	5.3775	6.87511	5.0441	3.98874	5.88453	5.10285	5.11823	4.91893	5.42534	4.57745	5.30675	5.68793	4.34694	6.07002	4.40482	4.48229	4.72418	5.0734	4.24376	5.32622	5.07126	5.39993	4.47946	7.06412	4.77485	6.44549	5.60478	5.03614	4.56804	7.90794	4.37927	7.30496	5.32098	5.27908	5.08636	5.07276	5.26083	5.80121	5.38422	9.02383	6.96837	4.74367
ENSG00000023191.17_RNH1	8.56937	8.73429	8.80064	9.19943	9.54638	8.89225	9.24264	9.4461	9.01568	8.89895	10.2678	10.0546	9.39916	8.64286	8.62505	8.9325	9.13854	9.04574	9.19624	9.14229	8.9208	8.25764	9.0487	8.73432	8.66788	9.36429	8.61139	8.83414	8.57064	8.95657	8.67943	9.08183	9.01004	8.86086	8.56173	8.55735	9.04015	8.59283	8.46856	9.60096	8.8877	8.95225	8.44851	8.88023	8.54901	9.04236	8.89959	9.0374
ENSG00000023228.14_NDUFS1	10.3842	9.78528	10.8893	9.77314	11.0535	8.85143	10.1192	9.46339	9.63433	9.27602	10.1695	9.50846	10.6998	9.2674	10.3058	9.34741	10.4211	9.91413	9.84877	9.88957	10.4218	9.51244	9.69991	9.53518	10.3042	10.2344	10.4275	9.60849	10.1055	9.60064	10.4602	9.14566	10.0413	9.73279	10.6461	8.82325	10.9034	9.75277	9.67439	8.92874	10.0293	9.61194	9.67019	10.0985	10.0515	9.79057	9.25802	9.8728
ENSG00000023287.13_RB1CC1	8.19396	8.4055	8.31631	7.26199	6.85854	8.10502	7.37497	7.90425	8.65412	8.49936	7.29662	7.42226	7.31102	8.2507	8.73112	8.54093	8.10021	8.0081	8.36776	8.57319	7.89531	8.48132	8.51943	7.9963	8.27415	8.92151	8.25919	8.03014	8.75322	8.20576	8.45331	8.01844	8.22975	8.25557	8.30041	9.45341	8.43888	7.86687	8.23116	7.69846	7.97378	8.18057	10.9815	9.2778	8.26707	8.42807	8.10097	8.39899
ENSG00000023318.8_ERP44	7.90519	7.82849	8.61531	6.7942	5.26346	7.00284	7.61759	7.24469	8.27438	8.01836	5.23186	5.57164	8.00117	7.89165	8.50202	7.73319	7.97739	8.19078	7.70283	7.7554	8.51942	7.86963	7.89266	7.84542	8.07438	7.63117	7.83255	7.38838	8.28948	7.93377	8.16583	7.44668	8.02455	7.93923	8.17157	6.76955	8.96536	8.59881	7.64694	7.03459	7.88625	8.13745	8.08742	8.28158	8.04505	8.2771	7.38345	7.82392
ENSG00000023330.15_ALAS1	9.53558	8.59982	9.26482	7.91879	7.39837	8.70656	8.17669	8.31252	9.19919	8.0931	8.51396	7.98936	8.79619	8.30667	10.1187	7.09855	9.25528	9.62463	9.11503	8.97343	9.0006	7.71025	8.11234	7.82192	8.73739	7.52495	8.83603	8.15417	9.31154	8.85501	9.85786	8.32661	8.67759	8.01185	9.28702	6.71607	10.4155	8.53948	8.82215	7.36909	8.62045	8.54429	8.76975	9.15511	8.96509	8.81511	8.85038	7.93927
ENSG00000023445.16_BIRC3	9.41496	9.05409	9.57072	6.52819	7.79386	8.05146	8.52605	7.73837	11.4278	8.38601	7.4772	6.23143	7.14083	8.76595	11.5428	10.2679	9.30908	9.93224	9.41813	9.20804	10.2864	7.31836	9.38891	8.0338	9.96224	8.41049	8.9891	7.58639	9.11025	10.5324	10.2668	7.87845	10.1238	7.61852	9.3953	6.64533	10.3078	9.66148	8.95895	6.49497	9.24901	8.38132	10.7079	10.9308	11.3906	11.4297	9.79521	7.64323
ENSG00000023516.9_AKAP11	9.06837	9.72339	8.98271	9.81079	5.48982	9.13368	8.77604	7.97257	8.67775	9.71471	7.3792	5.98401	8.80703	9.27085	8.76946	9.03734	8.66768	9.26315	9.07713	8.74624	8.88644	9.73414	9.71893	9.97625	9.03087	10.6548	8.96515	9.25951	9.22195	9.33913	8.83045	8.65175	9.03778	10.2983	8.89764	10.0896	8.92329	9.47965	9.09562	9.48427	8.95242	9.76334	9.88166	9.10126	9.51579	9.65559	9.29397	10.1965
ENSG00000023572.10_GLRX2	4.96986	4.62947	5.52903	3.86605	4.22348	4.05427	4.68614	3.48155	4.22697	5.32771	1.7056	3.38306	5.12837	4.58233	5.08751	4.6456	4.77188	5.40178	4.33995	5.5265	5.21325	5.20045	4.78338	4.78591	5.09121	4.94067	4.86093	4.60959	4.73017	5.05214	5.03835	4.66172	4.29974	5.18987	5.06757	4.47219	5.17283	4.57261	4.94994	4.07796	5.35744	4.85367	4.45027	4.50687	4.6674	4.77713	4.87006	4.82041
ENSG00000023608.5_SNAPC1	3.90706	4.2057	4.14595	4.81444	5.67922	5.4617	4.01262	4.35374	3.02677	3.88686	3.57078	5.71265	3.54014	3.57928	3.74461	4.89018	4.25995	5.4558	4.09611	3.78931	4.28156	5.06029	4.86363	4.54305	4.17378	5.09638	4.17036	4.79764	4.02935	5.22842	3.91916	5.25555	2.92594	4.66935	3.89517	4.36892	3.32812	5.00867	4.13681	4.86442	4.16604	4.70907	4.73718	3.60626	3.79766	4.4751	4.05004	4.9312
ENSG00000023697.13_DERA	7.28826	7.42011	8.10603	5.04517	5.02735	5.85021	7.08695	6.43778	7.31447	7.22881	6.16354	5.15649	7.28119	7.12293	8.02001	5.98771	7.61606	6.71633	7.46132	7.8141	7.08247	6.62799	7.13474	7.24904	7.24311	6.49825	7.43308	5.98602	8.41396	6.45264	8.40657	5.7686	7.75125	7.40571	7.90237	5.68718	8.06682	7.36689	6.93778	6.07446	7.39316	6.92814	7.73031	7.88548	7.1308	6.59459	6.85599	6.77913
ENSG00000023734.11_STRAP	7.48213	7.75547	8.14459	8.18043	7.27829	7.47256	7.35819	7.93795	7.08338	8.5972	7.2101	8.35126	8.31146	7.88816	7.04083	6.9644	7.53181	8.39234	7.03484	7.70935	8.06973	8.39979	7.31391	8.11216	7.59866	8.0789	7.59462	8.78546	6.93818	7.80956	7.68037	7.80476	6.89161	8.54315	7.83643	7.16427	7.80897	7.8487	7.00944	7.65642	7.26295	7.76137	8.41488	7.72353	7.57958	8.03839	6.96421	8.42991
ENSG00000023839.12_ABCC2	3.11704	3.30074	2.62927	4.94165	3.54217	4.97471	3.79562	3.46116	4.15845	6.05661	1.7056	1.7056	3.4891	5.31898	3.48081	5.7745	2.58124	3.50344	3.20069	3.57702	3.71857	5.93111	3.78743	7.05287	3.14883	3.01078	3.856	4.72734	3.60678	5.26994	3.90263	4.56569	4.0297	6.66151	3.42702	8.76657	3.27983	7.97978	4.43887	4.78435	3.83011	3.48484	6.72056	4.94219	3.4438	4.29949	3.62744	4.17375
ENSG00000023892.11_DEF6	6.30651	6.29004	6.10211	5.9598	5.67835	7.69854	6.45774	6.00087	6.22458	6.90041	6.29042	7.32112	6.4138	6.56753	5.94944	7.44651	6.60602	7.43832	6.35256	6.67207	5.8986	6.47203	5.32182	7.08526	6.36009	4.17856	6.31839	7.01962	6.16496	7.53153	6.24387	7.46483	7.28772	6.99394	5.94279	6.36757	5.84565	6.86094	6.55458	7.11791	7.06298	6.56463	6.11007	6.06503	7.2748	6.6879	7.59502	6.90044
ENSG00000023902.14_PLEKHO1	5.60996	5.35661	5.0517	5.80273	4.75243	7.1853	5.22108	6.11269	5.01556	5.63258	6.02692	5.9555	5.12911	5.76356	5.05623	5.04664	7.29269	5.92268	5.63489	6.2182	4.61676	5.15542	7.89589	5.8071	5.63581	9.87763	5.26712	4.89428	5.45211	7.863	5.28475	6.27165	6.71526	5.60379	5.42581	6.25767	4.77325	5.67167	5.65869	4.64434	6.64143	4.98018	5.61854	5.43376	6.36504	5.84295	7.42848	5.05064
ENSG00000023909.10_GCLM	6.76639	6.78382	7.10335	7.09989	6.14274	6.7507	5.7326	6.43046	5.89114	7.02239	6.76705	6.39178	7.54463	7.06806	6.54978	5.7646	7.08162	7.36075	6.76456	7.20453	6.56106	7.03308	6.03045	6.73244	6.40389	5.30099	6.84868	6.56367	6.66904	7.20206	6.60892	6.707	6.44988	6.71747	7.41775	5.03777	7.40551	6.98497	5.90123	5.66341	6.81155	7.94841	6.33737	6.30649	6.66469	6.7623	5.94097	7.66783
ENSG00000024048.11_UBR2	9.64573	9.14575	9.51358	8.59716	10.3653	9.32025	8.8021	9.37422	9.75691	9.16872	9.45115	9.02385	8.64407	8.81231	10.1627	8.99393	9.36546	9.43765	9.96138	9.4292	9.40483	8.93316	9.45783	8.99223	9.4359	9.22927	9.35765	8.73461	10.1202	8.95551	9.90572	8.90876	10.0227	8.98195	9.27994	8.90669	10.0347	9.3292	9.4756	9.46523	9.3821	8.73553	9.19067	9.78643	10.2077	9.27338	9.63111	9.04543
ENSG00000024422.12_EHD2	6.58043	5.53301	5.59334	6.53349	4.59091	8.12466	7.27543	7.11483	6.76487	7.04691	6.76604	7.32228	7.92183	5.3831	6.57906	5.0916	8.28188	8.07327	5.76014	7.37515	6.71757	6.22374	9.02239	6.15578	6.26823	11.1499	7.53157	5.7929	6.09201	7.27971	5.3867	7.19992	5.95192	5.77582	7.66599	6.30395	5.30356	5.27745	6.7645	6.08931	7.43108	4.75117	5.51108	5.82521	6.50493	7.18667	6.33259	5.5418
ENSG00000024526.17_DEPDC1	6.69083	5.79052	6.54765	5.68428	1.7056	4.83791	5.92765	4.49092	4.19652	6.41268	1.7056	4.88319	6.8612	6.10515	5.47528	6.43426	4.51004	7.20195	4.44271	4.86907	6.99947	6.51463	5.48201	6.87012	6.64721	3.46953	6.55129	6.96845	3.87547	6.62814	5.19862	6.74192	4.52123	7.17165	6.10504	4.96347	5.74977	5.74843	6.44853	5.01686	4.73633	6.84335	6.12808	5.10693	6.39146	7.65663	5.0123	6.62868
ENSG00000024862.18_CCDC28A	5.66845	5.80995	6.05754	3.76795	1.7056	4.43172	5.31202	3.49533	6.10473	5.26337	3.06369	3.4	5.13942	5.82525	6.2575	5.51993	5.85	5.21859	5.72809	6.7862	5.16183	5.20533	5.88349	4.97248	5.5182	6.01677	6.14616	5.27206	6.48271	5.73966	6.30959	4.40034	6.2877	4.96495	6.10621	5.08659	5.73253	5.81252	5.45814	4.30527	5.4749	5.21686	5.66489	5.69402	5.61345	5.47671	5.55701	5.86678
ENSG00000025039.15_RRAGD	4.14747	3.89438	4.15133	5.98652	1.7056	5.05364	4.04596	4.62513	4.28982	4.63899	3.71481	3.54996	4.41183	4.48043	5.12798	4.10858	6.671	4.09409	4.14309	5.65435	4.04944	6.02105	6.08296	4.17692	4.14685	6.40601	5.26359	4.26927	4.97112	6.07278	4.047	4.8002	5.17352	3.33838	5.78968	5.64855	4.193	4.452	4.23275	4.23963	6.10707	4.46908	5.16522	4.88748	5.32037	4.60932	5.4057	3.78587
ENSG00000025156.13_HSF2	5.17336	5.2924	5.21355	4.46878	1.7056	5.10747	4.78773	4.1332	4.44456	6.36025	3.93266	3.41768	4.73734	4.93355	5.1349	5.42135	5.0336	6.18033	3.99824	5.326	4.41356	6.18598	5.68877	5.74817	4.81375	6.86624	5.13749	5.98035	5.05583	5.40093	4.45383	5.18246	4.47551	5.69525	5.50115	5.57289	4.45606	4.91422	5.2742	5.26159	4.99577	5.57099	5.65659	4.7935	5.25166	5.62136	5.81403	6.05123
ENSG00000025293.17_PHF20	7.30922	8.16067	7.36785	8.36008	6.14433	8.03899	7.67903	7.79192	7.40755	8.52981	7.73741	7.66326	7.49239	7.87919	7.02153	8.10013	7.80093	7.63902	6.77384	7.43483	6.8923	8.81243	7.91783	8.18163	7.36102	8.80317	7.28149	8.08728	6.80383	7.50818	6.85148	7.30783	6.95551	8.56746	7.31719	9.12068	6.68738	7.88152	7.50158	8.25914	7.43879	8.11948	7.75845	7.03121	7.45471	7.83425	7.90802	8.85155
ENSG00000025434.19_NR1H3	6.60525	6.76246	7.09013	5.3843	6.4775	6.73754	5.85067	6.06819	5.92114	6.53237	5.8751	4.98964	6.98634	6.7525	7.07137	7.23764	7.03345	5.77454	7.31992	7.23312	6.25717	6.60883	6.47089	7.94774	6.5391	5.84564	7.1643	5.94995	7.48972	8.20083	7.64068	5.77076	7.33041	8.00707	7.16286	7.30848	7.30395	6.41531	6.44404	5.88639	7.57114	5.99227	6.9158	7.29088	6.4779	6.27757	7.38411	5.79579
ENSG00000025708.14_TYMP	8.33318	8.48912	7.34196	9.0414	9.08679	10.0979	7.98289	10.0998	8.46405	8.20626	9.71446	9.84841	7.70007	9.18739	8.70286	8.66468	9.11057	11.3965	9.30618	9.09208	8.66812	7.01834	7.35021	10.3629	8.02036	6.52888	7.16982	8.71614	7.66073	9.75167	8.6137	9.27729	10.5266	9.89488	8.72229	8.19617	10.1031	9.69689	7.44499	8.15461	8.44796	7.4738	8.6517	9.82184	9.81444	11.2484	10.1239	8.07333
ENSG00000025770.19_NCAPH2	7.56284	7.66529	7.18256	8.39275	9.02395	8.519	8.11183	8.75381	7.77729	7.93917	8.54744	9.21006	8.4451	7.64421	7.32406	7.93344	7.56495	8.22725	8.11076	7.24113	7.70508	7.86111	7.50094	7.69013	7.83629	7.46302	7.71085	8.43932	7.14604	8.02212	7.16757	8.51551	8.00476	7.57554	7.2511	7.50513	7.52047	7.59749	7.65946	8.98984	7.57041	7.23068	7.48172	7.83412	7.54211	8.10157	8.63028	7.90991
ENSG00000025772.8_TOMM34	5.66558	7.58664	6.33911	7.85477	1.7056	6.04414	6.15662	6.89064	5.59422	8.11005	5.89308	5.20328	6.84381	7.23456	5.2078	6.72375	5.94773	7.07956	5.75866	5.97525	6.10714	7.72654	5.9801	7.78183	6.73448	5.51875	6.12147	7.59864	5.93766	6.63621	5.41554	6.46373	5.73767	8.08098	6.08493	7.72436	6.10972	6.59489	5.48169	7.3568	6.23964	6.4494	7.36551	6.02303	5.81062	6.30493	5.98342	8.35518
ENSG00000025796.14_SEC63	7.80465	7.97118	8.23288	7.03679	5.48897	6.75232	7.89937	7.24679	7.47263	8.89503	5.89852	5.9816	8.21305	7.9853	7.59847	8.38449	8.08683	8.33678	7.03202	7.52165	7.99762	9.00877	8.39625	8.27417	7.7019	9.08297	7.42039	8.36096	7.71486	7.90859	7.47617	7.91289	7.53979	8.71677	8.12094	7.83307	7.71158	8.46716	7.46789	7.95007	8.01968	8.11224	7.86986	7.54654	7.88459	8.56002	7.76166	8.66549
ENSG00000025800.14_KPNA6	8.6333	8.39074	9.01848	8.65634	8.21061	8.3017	8.79996	7.61198	8.58141	8.89103	7.0433	8.07769	9.1269	8.38224	8.55792	8.44218	8.75827	9.40393	8.37899	8.77782	9.02361	8.83786	8.95507	8.901	8.83525	9.70704	8.77766	8.60653	8.59186	8.8066	8.61125	8.70499	8.34365	9.21345	8.77094	7.86988	8.65932	8.52475	8.40269	8.55595	8.56794	8.64772	8.59434	8.17009	8.3964	9.14919	8.26716	8.97023
ENSG00000026025.16_VIM	9.71495	8.57955	9.37774	8.83312	7.53752	11.503	10.4455	9.99623	10.0169	10.2597	10.7743	10.454	11.1798	9.6862	10.2849	8.5069	11.8605	9.19753	9.10234	11.2656	9.48106	9.0819	11.7979	9.72957	9.45027	12.1806	10.7688	8.62978	9.53329	10.8301	9.14744	11.2389	10.712	9.13174	11.0781	10.1856	8.85276	9.2646	9.81905	8.56744	10.93	8.10688	9.44105	9.69115	10.1713	9.60914	11.2687	9.03119
ENSG00000026036.22_RTEL1-TNFRSF6B	3.82631	5.23127	4.3031	7.89307	1.7056	7.45728	1.7056	8.78831	5.76135	5.3544	5.97187	7.54673	4.72153	7.55376	3.92532	5.60978	6.00994	5.73804	5.11957	5.26653	1.7056	7.01773	4.44492	5.37219	5.55818	4.64217	4.50684	6.15937	5.58745	6.54557	5.79099	7.9468	6.59739	4.62951	5.66823	8.30373	4.35536	5.00501	4.83932	8.14369	5.79064	5.44563	7.15775	6.326	6.53228	5.67793	7.36796	5.87483
ENSG00000026103.22_FAS	6.75008	6.83728	8.03731	5.61913	5.76057	7.04076	7.45501	6.50189	6.73102	6.03156	6.40887	6.88225	6.22445	5.62302	7.32298	5.74311	6.31822	7.99706	6.64892	6.90922	7.73684	6.35446	6.84538	6.89203	7.30657	5.9533	6.57709	5.53623	8.22238	6.52329	6.9121	5.20709	7.20089	6.74498	6.41158	4.33747	6.91754	6.68017	7.43933	5.62456	6.29601	6.17599	5.75754	6.34998	7.41054	7.38296	7.50445	6.98981
ENSG00000026297.17_RNASET2	7.78444	8.16107	8.2936	8.69871	8.98922	8.32636	8.38502	8.54641	7.21448	8.6906	7.72227	8.17848	7.59649	8.47775	8.4015	9.68082	7.78968	9.2593	7.5961	7.58134	7.96661	8.37572	7.39982	8.40336	7.34928	6.60165	7.41269	8.2287	8.45912	8.42811	7.34301	8.14355	8.37971	8.43659	7.42263	8.79797	7.72824	8.14076	7.35014	8.26882	7.48739	8.50762	7.58605	7.77992	7.8603	8.41504	8.47596	8.54916
ENSG00000026508.20_CD44	8.15471	8.21028	8.62726	9.67347	7.25054	11.8419	7.5054	9.56359	8.11506	10.5042	7.68874	9.42854	8.31229	9.81093	7.74622	10.1169	8.72166	10.427	7.2662	8.47704	8.06869	10.5196	8.7313	10.0807	8.78705	9.57514	8.31175	10.5346	7.28331	10.4054	8.17764	10.178	7.96412	10.2831	8.56648	9.61344	7.47798	9.57094	8.35387	10.282	8.82876	10.7772	8.8208	7.51615	8.51723	10.8047	9.39773	9.785
ENSG00000026559.14_KCNG1	4.70216	4.92516	4.91721	2.80686	7.72549	4.44279	1.7056	1.7056	6.29811	2.94731	6.85538	5.70926	4.3784	3.26737	6.36319	1.7056	4.83635	1.7056	6.53784	5.84522	4.32853	2.92492	5.49389	1.7056	6.12959	5.61198	5.20595	5.36644	6.87227	4.05146	6.21136	3.92882	5.0085	2.32246	5.95955	6.11592	4.46494	3.66314	4.50732	4.72689	5.25995	3.53943	4.84672	5.64697	3.09428	1.7056	5.50576	2.64437
ENSG00000026652.15_AGPAT4	5.80238	5.93367	4.10499	4.42463	6.17053	5.5886	6.54381	5.94208	6.91912	5.25213	6.95792	6.04071	5.75821	4.98226	4.86956	7.19131	6.82579	7.44492	6.11444	5.71819	6.55948	4.13467	7.13528	5.85259	5.65045	7.25096	5.23069	5.5025	6.52289	5.73059	5.11441	5.11951	5.12637	5.1528	6.16622	6.70771	5.93947	6.06796	6.65578	4.25131	5.08492	7.92395	5.7614	5.38204	5.4869	5.11807	5.92292	5.88917
ENSG00000026751.17_SLAMF7	5.68485	4.85037	5.62271	3.53881	1.7056	4.48613	5.4184	4.16857	4.95886	4.50663	4.01765	1.7056	3.63082	4.97919	5.7357	3.22128	7.71978	5.59179	4.18527	6.02707	5.4528	5.529	3.9227	6.46885	6.59941	3.58989	4.33648	4.36173	5.97321	7.91102	4.74964	3.60932	6.68173	5.22007	7.18089	3.86913	5.42135	5.58635	6.25508	4.36144	7.52694	4.21433	6.03069	6.08544	7.79603	6.51778	4.67452	5.28729
ENSG00000026950.17_BTN3A1	8.17812	7.40529	6.85267	7.46036	7.48815	8.18102	7.16399	7.60155	7.43194	7.65994	7.43377	7.17921	6.83168	7.94052	8.16423	8.43417	7.34601	9.27296	7.61227	7.47081	7.30651	7.91063	7.15366	8.37459	7.10697	7.19029	7.06592	7.86768	7.75153	8.26301	7.36176	8.5763	8.44171	8.16624	7.41312	8.14674	7.02967	8.9645	7.6894	8.23423	8.11099	7.73881	7.38231	7.59689	9.52509	9.46185	8.66939	7.73103
ENSG00000027001.10_MIPEP	6.98496	7.54038	7.35324	7.76926	4.99316	6.43667	7.13868	7.1208	5.33848	7.03366	5.3451	7.0143	7.36396	7.03001	6.11864	6.72482	6.52569	7.52631	6.61523	6.88419	7.09738	6.76206	6.31462	7.78177	6.97851	6.20823	7.15074	7.14406	5.93691	6.54865	6.6368	6.80386	6.16974	8.06499	6.94271	7.28441	7.27222	6.61159	6.37727	7.1835	6.73637	6.65328	7.41701	6.73033	6.99895	7.07671	6.62902	8.03295
ENSG00000027075.16_PRKCH	6.31312	5.31282	6.00588	6.77577	6.93498	7.84178	6.30278	6.81694	5.94136	5.04451	6.50974	7.55035	6.39723	5.69854	6.73437	5.82967	7.38588	6.81794	6.14801	6.75261	6.73646	5.65353	6.38625	7.20577	5.64246	5.98306	6.98408	5.68005	6.27269	6.91633	5.99129	6.33264	7.52615	6.10874	5.96303	6.6095	5.66965	6.12625	6.63726	5.54723	6.55031	5.97805	6.55193	6.11113	7.82923	6.88434	6.503	5.21898
ENSG00000027697.15_IFNGR1	8.19408	8.01805	9.04145	6.55767	8.33971	8.07966	7.99328	7.61026	9.77661	8.76008	5.92244	6.49176	7.91432	7.71095	9.51093	7.83809	8.8925	8.39139	8.36555	8.29964	9.01383	8.54134	8.6584	8.07428	8.53019	7.55279	8.23603	7.43709	9.84245	8.62202	9.1363	7.89382	8.58136	8.27278	8.68342	6.46223	9.83418	9.06834	8.42845	6.4658	8.36404	7.84771	9.08643	8.88248	8.56092	9.73497	8.40412	8.14851
ENSG00000027847.14_B4GALT7	6.06475	6.21365	5.86588	6.72383	6.84825	6.85806	6.43535	6.73964	5.62285	6.03304	4.20343	5.96086	6.43225	6.5657	5.36716	6.22719	6.12159	6.13306	6.23871	6.06612	6.06955	6.16194	5.54176	6.63356	5.58579	5.69914	4.9693	6.10391	5.64216	5.84409	5.60457	5.39412	5.77062	6.58056	5.84383	5.88343	5.4268	5.91779	5.48271	7.02729	5.59816	6.79429	6.27529	5.97961	5.74767	6.20677	5.89864	6.78123
ENSG00000027869.12_SH2D2A	3.64159	3.05681	3.97666	3.78937	1.7056	4.94839	4.00374	4.69598	3.38913	4.97956	3.07642	4.94341	4.01168	4.29386	3.99709	5.32927	4.68736	5.43008	3.89787	4.28704	3.48563	4.71691	2.65532	5.23486	3.88529	2.58109	3.49422	3.91968	3.56601	5.47628	3.5417	3.84933	5.46373	5.76224	3.25621	4.75371	3.81527	4.13654	4.78517	3.8602	4.63844	4.10007	4.79893	3.80974	4.75149	4.97633	4.2178	4.84185
ENSG00000028116.18_VRK2	5.94215	6.14184	6.87483	5.75676	5.57072	5.93268	6.42993	6.02012	6.04174	7.1126	5.31288	5.47565	6.54667	6.88338	6.50917	7.2361	6.61101	7.66009	6.30115	6.79332	6.60721	5.58684	6.56934	6.58363	6.5095	6.89956	6.68205	6.33868	6.42173	6.66073	6.13305	6.51073	6.45067	6.82741	6.47024	6.43119	6.59624	7.10123	5.95223	5.59268	6.42777	6.88139	6.10545	6.15172	6.9086	7.72254	6.58885	7.10365
ENSG00000028137.19_TNFRSF1B	7.6455	7.50684	7.38021	9.73737	8.8014	9.85971	7.6614	8.74159	8.40317	7.57596	8.58857	7.2878	7.46801	7.61271	8.31389	7.59536	8.01553	8.4819	7.66722	6.75712	7.56835	7.68515	7.94818	8.68415	7.72776	7.41519	6.82675	8.32091	8.53074	8.62149	7.2837	8.47727	8.3117	8.89184	7.55677	7.38581	8.00225	7.85328	7.2852	8.19901	7.23074	6.86324	7.96796	8.24671	8.29617	8.25922	7.59448	8.52106
ENSG00000028203.18_VEZT	8.01003	7.44069	8.23593	6.27751	1.7056	7.38243	7.58706	6.99462	8.58188	8.08575	6.26598	5.63947	7.47877	7.74411	8.29655	8.34661	7.48805	8.17798	7.86219	7.59226	8.27907	7.93687	8.07984	8.38143	7.80475	8.6347	7.65761	7.62183	8.17507	7.79514	8.23297	7.94383	7.89779	8.58125	7.76698	7.99724	8.75013	8.29242	8.1093	7.14889	7.73619	8.12344	8.19421	7.95802	8.23603	7.75021	7.65672	7.65462
ENSG00000028277.21_POU2F2	4.29224	4.89249	4.80859	4.58601	1.7056	6.29838	4.79118	4.50646	5.5911	4.80926	5.27504	1.7056	4.08921	5.03769	5.03941	4.29582	5.86195	4.43539	5.46814	6.06647	3.66789	4.79107	4.6551	5.30312	4.72691	6.11554	5.8899	3.90591	6.34387	6.93678	5.00458	5.64874	6.02379	4.7096	4.65301	5.54014	4.70719	5.42364	5.71142	4.26336	5.50256	3.24888	4.89376	4.06857	5.51538	4.49389	8.13297	4.83669
ENSG00000028310.18_BRD9	7.17779	7.12005	6.62995	7.96621	7.07259	8.57251	7.33892	8.36447	7.95682	7.7338	8.13578	8.59777	7.33256	7.93156	7.35701	8.80894	7.45148	7.86044	7.42772	7.29343	7.21199	7.89277	7.03384	7.52916	7.52419	7.09899	7.34982	8.30026	7.24533	7.96744	7.20476	8.84151	7.5077	7.36198	6.94766	8.33634	6.97772	7.8162	7.91403	8.0649	7.17441	7.84028	7.12677	7.41241	7.30875	7.52343	8.24498	7.67034
ENSG00000028528.15_SNX1	8.50748	8.4113	9.07526	9.48108	10.255	9.29192	8.62811	8.71444	9.4693	8.96172	10.0413	10.4149	8.95254	8.64402	9.29239	7.92321	9.03433	8.6006	8.82966	9.59844	8.56447	8.15618	8.68596	7.37501	8.59474	9.05167	9.01013	8.74492	8.97592	8.90487	9.21412	8.91565	9.38301	7.16661	8.74093	8.78661	9.28617	9.22519	8.71477	8.94019	9.00626	8.64211	8.61348	8.97191	8.61075	8.47613	9.57863	8.14869
ENSG00000028839.10_TBPL1	5.78657	5.26872	6.27286	4.42292	3.81307	4.02744	5.39845	5.5777	5.94295	6.57889	4.92681	1.7056	5.03264	5.78912	5.65855	5.3206	5.0621	6.21947	5.33363	6.29885	5.39753	5.64717	5.04648	5.0378	5.25135	4.76945	6.24816	5.64604	5.65148	5.83961	6.0734	5.73676	6.04055	5.05471	5.76338	4.57935	5.87214	5.81112	4.20182	4.99854	6.05788	6.55836	5.41338	5.58942	5.88433	5.82748	6.85305	5.74691
ENSG00000029153.14_ARNTL2	5.0445	5.28066	5.16931	6.61647	5.03928	6.71599	4.88705	7.4212	4.90511	7.95964	2.85103	6.47259	4.94473	6.89373	4.74257	8.07112	5.19086	8.77778	5.41856	6.60169	5.83979	6.58832	5.60504	7.76753	5.46025	6.07932	5.10533	6.50688	3.6168	7.21422	4.70304	8.42737	4.03356	7.88627	5.17516	7.05666	4.82983	7.7817	4.78436	5.53407	4.39829	6.48073	6.62756	5.14852	5.77759	8.66775	5.1542	5.87215
ENSG00000029363.17_BCLAF1	9.37908	9.0387	9.69507	8.93587	7.90625	8.52064	9.22687	8.0262	9.45374	9.80888	8.32308	7.54802	9.53867	9.02362	9.05551	9.8332	9.22218	9.8676	8.64743	9.16245	9.33722	9.76745	9.17532	9.46785	9.74008	9.61912	9.51521	9.60423	9.04924	9.36354	9.24303	9.34875	9.11815	9.7252	9.40475	9.66625	9.29452	9.52813	9.25077	8.66291	9.19724	9.62739	9.05868	8.79316	9.18765	9.81789	9.44449	9.65
ENSG00000029364.12_SLC39A9	9.06092	8.81352	9.43146	8.75997	8.24516	8.35752	9.15296	8.03148	8.96587	8.78523	9.22654	7.50387	9.33245	8.75869	9.41923	8.37283	8.83866	9.0242	8.68174	8.60951	9.51702	8.84565	8.7738	8.7749	9.07396	8.39651	8.70173	8.92938	9.20282	8.88777	9.20667	8.58861	8.82968	8.92063	9.04038	8.54347	9.45243	9.133	8.773	8.6693	8.75151	8.86951	8.92109	8.96946	8.76445	9.32232	7.9364	9.183
ENSG00000029639.11_TFB1M	6.01201	6.07355	5.79248	5.00937	1.7056	5.29802	5.4919	4.35466	4.78873	6.26688	4.20638	4.73574	5.78322	6.00677	4.94971	6.84389	4.45075	6.04054	5.38944	5.1626	5.36302	5.88257	5.85725	5.6075	6.01444	5.8137	5.77091	5.79493	5.64018	6.31393	5.55175	5.45508	5.89693	5.54729	5.89113	6.11668	5.6155	6.49297	5.30733	5.20552	4.81658	6.4789	5.79768	5.62131	5.60456	5.92293	5.98526	6.41197
ENSG00000029725.17_RABEP1	7.43969	7.08786	7.52923	6.43036	6.44862	7.49682	7.61598	7.11668	7.95493	7.45847	6.96261	7.14299	7.53031	7.63939	7.72523	7.78789	7.99757	7.9374	7.67787	7.97176	7.15294	6.7867	8.03249	7.68205	7.50127	8.77262	7.83157	7.58663	7.92004	7.8142	7.5857	7.50485	7.55924	7.71491	8.06082	8.07864	7.95295	7.61421	7.74004	6.79464	7.65075	7.23238	7.22102	7.6014	7.81838	7.7712	8.01513	7.19182
ENSG00000029993.15_HMGB3	7.16714	7.39991	7.32015	7.982	4.494	6.4268	6.40346	6.42064	5.6338	7.57612	6.94677	7.59384	7.58046	7.11813	6.60159	7.64508	7.55242	7.08309	6.61511	7.21107	7.03577	7.90979	5.8679	7.50681	7.06492	4.60292	7.23501	7.59409	6.38617	7.68983	7.1286	6.4642	6.55893	7.94637	7.74504	5.94258	6.77307	6.5641	6.12416	8.19011	7.0742	7.71467	7.13	6.84548	7.20604	7.15484	6.30217	8.10851
ENSG00000030066.13_NUP160	7.79424	7.79443	7.77017	7.93887	6.14869	7.80589	8.05051	6.94352	7.80119	8.54763	6.26709	6.07849	8.50929	7.51693	7.612	8.49667	7.86391	8.36321	7.36826	7.29524	7.93046	8.16273	7.88577	8.38964	8.37578	7.99203	7.91036	8.69461	7.79111	8.07594	7.74459	8.43562	7.66395	8.35225	7.78774	8.23779	7.80361	8.03824	7.68671	7.53835	7.8656	8.14157	7.75301	7.73258	7.9195	8.40116	7.85529	8.45227
ENSG00000030110.13_BAK1	8.44272	8.492	8.83351	7.3032	7.6344	7.48536	7.86744	7.87338	8.69497	7.5506	8.14403	7.97211	8.85137	8.1019	8.93899	6.71114	8.71079	7.96281	9.01709	8.51981	9.04398	7.89414	7.94524	7.6201	8.25907	6.16345	8.06865	7.52847	8.83402	8.47013	8.86508	7.57518	8.72598	7.82878	8.65768	6.392	9.67487	8.59724	8.01301	7.38584	8.50423	7.56182	8.12318	8.9552	8.49307	8.25451	7.67145	7.90386
ENSG00000030304.14_MUSK	4.96616	2.85969	4.56914	1.7056	1.7056	4.69351	4.75137	1.7056	4.92673	2.43008	3.43104	1.7056	5.74965	2.99087	4.43564	3.04761	5.20202	1.7056	3.23256	3.31974	4.46871	2.70436	6.74529	2.53055	4.95453	4.9031	4.54467	1.7056	4.69387	2.84638	2.99139	1.7056	4.694	1.7056	5.14388	3.13733	3.83209	3.18938	4.42234	1.7056	5.18097	2.85394	1.7056	3.06785	4.07871	3.16588	5.38811	2.89592
ENSG00000030419.17_IKZF2	6.45231	5.06087	6.53826	4.53148	1.7056	5.46398	5.96822	6.07478	5.06107	4.4446	7.60395	6.35199	6.20528	5.72049	6.14104	5.68	5.92084	7.24984	5.96055	6.7468	6.38875	4.87762	6.38359	5.00757	5.81726	6.03749	6.34561	5.96801	6.61875	6.24428	5.67017	5.88992	6.00335	4.68305	5.85923	5.09355	6.50941	5.96956	5.56473	4.21361	5.62737	6.68025	5.66513	6.42403	6.31261	6.88551	6.13984	4.7004
ENSG00000030582.18_GRN	11.4947	11.6119	11.4224	11.0286	12.2131	10.9037	11.7778	11.8627	11.6838	10.3514	12.2984	11.1228	10.8926	11.0362	11.4955	10.174	11.1194	10.745	11.6659	10.8834	11.0664	10.5316	10.7228	10.4084	10.342	10.3866	10.0939	10.2727	12.0085	10.4949	11.3739	9.977	11.2846	10.2537	11.0169	9.67777	11.6482	11.1567	10.4298	11.4775	10.9768	10.6563	10.9581	11.9369	10.4936	10.6774	10.7489	11.7415
ENSG00000031003.10_FAM13B	7.23584	7.13762	7.33761	6.48103	6.94715	7.3823	7.55091	7.04523	7.65664	7.11972	7.52272	6.05194	7.41337	7.38124	7.58859	7.62009	8.09991	7.48227	7.54434	7.43686	7.46337	7.22398	8.32837	7.32783	7.57522	9.01141	7.95333	7.44768	7.73638	7.34797	7.48778	7.27894	7.8006	7.19986	7.49574	7.71134	7.40829	7.43142	7.82652	6.15392	7.51764	7.46791	7.53464	7.45604	7.56153	7.71253	7.97275	7.06048
ENSG00000031081.11_ARHGAP31	7.16233	5.73763	6.98711	6.54123	6.85712	7.81602	6.99548	6.94179	7.28646	6.52906	5.23323	6.39274	7.65021	6.66425	6.61993	6.143	8.36074	6.66871	6.16332	7.99364	6.98462	7.21217	8.23693	6.66187	6.78002	8.65427	7.4956	5.84011	5.47769	7.96584	5.85524	8.19225	7.71179	6.21425	7.00842	6.46905	6.07026	6.35984	7.42603	4.74239	7.29854	6.85187	6.46465	6.2585	7.11627	6.79099	7.58576	5.32142
ENSG00000031691.7_CENPQ	3.74371	4.63291	4.50644	2.80474	1.7056	4.07505	3.58275	3.5016	4.14077	5.26211	1.7056	1.7056	4.33889	3.93463	3.53371	4.84297	3.77101	4.66165	4.00247	4.47329	4.23668	5.13389	3.92343	4.73818	4.50737	4.01891	4.45049	5.30539	3.29285	4.54691	3.83252	4.33035	4.468	4.70901	4.15564	4.56302	4.12021	4.95415	3.10972	4.64912	3.39625	4.51157	4.68229	3.71792	4.31321	5.01561	4.20055	5.20759
ENSG00000031698.13_SARS1	8.32215	8.66801	8.6698	8.45425	7.38003	8.07648	8.57473	7.86822	8.08822	8.6609	8.19803	8.46401	8.92695	8.54125	7.9787	7.54617	8.3522	8.90859	7.85329	8.44511	8.43152	7.83578	8.34682	8.34697	8.46627	8.59306	8.37535	9.08179	8.2053	8.36692	8.28261	8.37933	8.48539	8.60909	8.48437	7.26974	8.32599	8.11186	7.92957	7.01695	8.36779	8.27175	8.36897	8.26733	8.30328	8.03707	8.63539	8.47553
ENSG00000031823.14_RANBP3	7.61413	7.85331	7.63324	8.09018	6.92096	8.36911	7.58636	8.37934	8.17047	8.22766	7.05666	8.6826	7.68892	8.33955	7.91651	7.74846	8.01675	8.03654	7.76158	7.94891	7.58586	7.93027	8.0155	7.88168	7.50972	8.64246	7.9055	7.66632	7.6051	8.19948	7.97188	8.55647	7.78643	7.7499	7.84246	7.91604	7.86513	7.51205	7.98757	7.75174	7.94687	7.98638	7.60912	7.80825	7.77687	8.04419	8.25805	8.00905
ENSG00000032219.19_ARID4A	7.26886	6.8479	7.14368	6.64397	5.66062	7.0704	6.84975	6.56399	7.01982	6.69162	6.89246	6.76054	6.42531	7.25578	7.4906	6.58263	7.53936	6.87035	7.6314	7.17477	6.93104	6.76766	7.45435	7.19566	7.10387	7.77516	7.48384	7.29207	7.53936	7.17633	7.67688	7.40931	7.44035	7.11162	7.42346	7.56759	7.48942	7.46591	7.05799	6.99188	7.32638	7.18517	7.08369	7.17995	7.54009	7.07319	7.52746	6.81296
ENSG00000032389.13_EIPR1	6.43425	6.44437	6.79212	6.39463	6.13381	6.6021	6.88068	6.29606	5.76819	6.49818	6.23753	6.17928	6.90227	6.8484	6.4737	7.55169	6.10266	7.26642	6.54363	6.10386	6.85847	6.47586	6.21014	6.87332	6.46878	5.59679	6.73908	6.80137	6.11673	6.26071	6.57406	6.62518	6.40027	6.9831	6.71844	6.73027	6.84396	6.18714	6.45268	7.2144	6.62723	6.86796	6.74455	6.24684	6.58144	7.34423	6.58701	6.65802
ENSG00000032444.17_PNPLA6	9.08754	9.29961	8.76912	9.97092	10.4728	10.1419	8.77042	9.83003	9.55497	8.36306	10.4809	10.3059	9.0253	8.91848	9.0587	8.97617	8.99661	8.46688	9.8829	8.6626	9.02139	8.54518	8.72095	8.62406	8.50469	9.05546	8.78577	8.97173	9.51491	9.02018	9.44191	8.98185	9.34759	8.73541	8.93401	9.39248	9.53146	8.48333	9.35001	9.13551	9.04741	8.49227	8.79293	9.53615	8.95045	8.82279	9.83997	8.90069
ENSG00000032742.18_IFT88	6.37855	6.92502	6.26781	6.09823	3.60682	6.14052	5.96854	5.65665	6.37693	7.18976	5.5754	3.94697	6.48942	6.40346	6.23741	5.62359	5.77223	6.30642	6.39522	6.43894	6.45211	6.48425	6.2998	7.19936	6.1153	6.69099	6.32497	5.58098	6.27495	5.43535	6.50971	6.49542	6.29876	7.14474	6.46596	5.79021	6.82174	6.48091	6.43833	6.1679	6.46817	6.13708	6.74493	6.55884	6.15104	5.09412	6.13645	9.3989
ENSG00000033011.14_ALG1	7.35814	7.38621	8.06205	8.24553	8.06159	6.93697	7.86159	7.85548	5.71379	7.31035	7.70899	8.27627	8.40579	7.04518	6.31789	7.53495	7.02885	7.25281	6.85468	6.45807	7.74507	8.17202	6.17688	7.50151	6.97814	6.92905	6.50365	7.62916	6.26781	6.71391	6.37857	6.74862	6.73921	7.92185	6.84274	7.59512	7.11698	8.44297	6.28325	8.68963	7.06902	7.94208	6.80399	6.94002	6.52276	7.16299	5.78543	8.28688
ENSG00000033030.15_ZCCHC8	7.00563	6.44591	6.84131	5.68163	5.89117	6.23994	6.33465	6.06466	7.27521	7.14801	6.42384	6.0008	6.62657	6.93963	6.91446	7.1644	6.80261	7.3539	6.55143	6.90698	6.61033	7.22936	6.77925	6.97661	6.92274	6.43832	7.015	6.94284	6.73876	7.28915	6.64806	6.94997	6.89946	7.17061	6.98449	7.14928	6.87741	6.76625	7.20776	5.85088	6.92033	7.10866	7.09812	6.75932	7.11913	7.38338	7.28427	6.46185
ENSG00000033050.9_ABCF2	6.58333	7.21111	7.35459	6.43956	6.77264	6.46986	7.50344	6.07315	6.8934	8.23056	5.45556	6.5553	7.61438	7.36336	7.14867	7.15136	6.52685	7.96948	6.93847	6.9307	7.33682	7.32934	7.25245	7.83708	7.3483	7.28747	7.45235	6.91609	7.67296	7.04486	7.44191	7.16473	7.25364	7.71823	7.15153	7.61232	7.23967	6.79952	7.3485	6.29136	6.97162	7.17355	7.73863	7.19596	6.88017	6.98271	6.82559	7.56978
ENSG00000033100.16_CHPF2	8.53551	8.40857	8.4827	9.36607	10.3322	9.13074	9.30051	9.53764	9.13268	8.77475	9.85179	9.42659	8.77464	8.93404	8.95986	8.19984	8.48783	8.66076	9.51544	8.39887	8.92724	8.57536	8.85982	9.18404	8.51955	7.92308	8.25371	8.43759	9.10767	8.75653	8.98328	9.33299	9.21281	8.98709	8.48044	8.93104	9.1353	8.74226	8.92687	9.61603	8.84883	8.54279	8.57605	9.07808	8.70086	8.81926	8.80168	8.71752
ENSG00000033170.17_FUT8	6.9846	7.09526	6.20438	7.38169	5.03079	7.75955	7.05082	7.53492	6.42075	7.19399	5.04827	5.15379	7.27241	7.43128	6.09919	8.16129	7.82377	8.0919	6.65604	7.01274	6.5953	6.93744	7.22351	8.79146	6.39657	7.16618	6.95872	8.41088	6.88909	8.23094	6.8353	7.9571	6.65286	8.88749	7.40973	7.46255	6.88564	7.79889	6.35334	6.66619	7.46702	8.3146	7.50048	7.27828	7.48645	9.37679	7.25199	7.31651
ENSG00000033178.13_UBA6	8.11564	8.02641	8.39835	7.7501	6.06817	7.8962	8.12091	7.31477	8.61161	8.48796	6.49223	6.4345	8.09792	8.1683	8.34621	8.36666	7.87461	9.46835	8.14584	8.07873	8.47299	8.58138	8.19801	8.93239	8.659	7.9347	7.95043	8.42434	8.23763	8.82096	8.56969	8.25537	8.10282	9.15865	8.13453	8.55295	9.09355	8.37287	8.50004	7.25615	8.08789	9.03535	8.792	8.45557	8.67395	9.5914	8.15494	8.48537
ENSG00000033327.13_GAB2	8.10986	7.79851	8.28106	7.05794	7.20953	8.17933	7.7167	6.6773	8.02067	7.10084	8.21909	7.37962	7.58537	7.7574	7.73696	7.97553	8.5304	6.94156	7.75818	8.30678	7.18461	7.5011	8.14569	7.78108	8.18241	7.77408	7.95491	7.5254	8.29661	8.27967	8.70741	7.77604	8.41405	7.68679	8.0878	7.78533	7.80747	7.93773	7.74994	7.72173	8.2213	7.72401	7.49654	7.58157	8.30022	6.3235	8.65501	7.21355
ENSG00000033627.17_ATP6V0A1	8.63073	8.68893	8.24764	8.64281	8.56407	8.36527	8.49202	8.72112	8.93818	8.5059	8.97151	8.37147	8.72099	8.64041	8.59409	9.06451	8.76445	8.27399	9.19043	8.18639	8.91773	9.1402	8.74543	7.80664	8.43772	8.62832	8.41942	8.09627	9.02498	8.19318	8.9023	8.32814	8.09778	7.85021	8.6805	8.26547	9.3937	8.63035	9.1472	8.69431	8.5781	8.42934	8.88143	9.12296	8.41691	7.92896	8.71302	8.50911
ENSG00000033800.14_PIAS1	7.90503	7.28481	8.15578	7.30321	5.93746	8.20667	7.14321	6.36132	8.14075	7.4395	6.22851	6.70948	7.40059	7.6788	8.65353	7.68532	8.048	7.90809	7.88469	8.13336	7.7231	7.87274	8.43725	7.75886	8.14743	8.94166	8.22207	7.33578	8.37725	7.99293	8.35762	7.53563	8.32492	7.6923	8.01573	7.96745	8.42687	8.81837	8.02232	6.0755	8.15084	7.72927	8.03847	7.99738	8.17734	8.15489	8.00153	6.8398
ENSG00000033867.16_SLC4A7	7.38	6.8036	7.67977	7.59784	5.14838	7.5725	7.49487	6.47224	7.01464	7.70093	6.86111	5.41089	7.62163	7.26726	6.83253	7.58469	7.24835	8.28817	6.55587	6.45486	7.08747	6.73522	8.28554	7.69025	7.07982	9.43375	7.1237	8.04175	6.01776	8.28748	6.63515	7.75341	7.6323	7.70234	7.05448	7.85669	6.85497	6.86441	7.48236	6.7076	6.37705	7.98009	7.67393	6.63062	7.86567	7.41883	7.66212	7.27685
ENSG00000034053.15_APBA2	4.12505	2.85161	3.42928	4.00448	1.7056	6.55175	5.02808	5.68102	3.2263	5.06969	5.46452	5.08389	4.52899	4.98848	5.41808	3.38672	5.45331	4.63315	4.19193	5.12484	3.40611	3.72591	4.36382	4.81752	4.50966	4.08989	5.09103	6.24071	4.12192	5.47282	3.71267	4.47638	5.57928	4.61055	4.70339	4.27637	4.25744	3.84232	5.01895	3.87748	5.1764	4.21791	4.11887	3.3757	6.7487	4.55505	4.59618	3.89318
ENSG00000034152.19_MAP2K3	7.96624	8.15377	7.88446	7.9657	8.81705	10.1268	8.61508	8.66813	9.30459	8.09288	8.63461	8.77653	8.84494	7.98365	8.87948	9.95605	8.60239	8.83886	8.78659	8.28472	8.84902	9.21002	7.93466	7.9352	8.01761	7.02271	7.92049	7.819	8.7877	8.66484	8.74418	8.67269	8.37508	8.09007	8.27587	8.07926	9.34609	8.21938	8.62665	7.93681	8.1211	7.77306	8.17664	8.65745	7.92335	8.84574	7.96124	8.19559
ENSG00000034510.6_TMSB10	10.8318	10.6586	11.5777	10.1406	9.37358	10.6536	10.7522	11.2598	9.50703	11.1642	10.7371	10.8135	11.3448	10.9207	10.0122	10.7492	10.5717	11.5016	10.4042	10.5724	10.9616	9.99475	10.0026	10.3831	10.5979	8.87528	10.4823	10.9871	9.62022	11.0428	10.1974	10.9609	10.6259	10.8089	10.7286	9.19279	10.9826	10.8402	9.80068	10.5138	10.2975	10.7395	9.9547	10.668	10.5399	11.6877	9.85685	10.8736
ENSG00000034533.12_ASTE1	6.24739	6.16021	6.23895	5.00153	4.21041	4.8979	5.50637	5.36972	5.53572	5.09476	5.52018	3.98994	5.8732	5.04453	6.25309	4.51466	6.18042	4.69025	6.82721	6.45178	6.38797	5.59509	6.06037	4.89109	5.95074	5.50424	6.50128	5.5839	6.76154	4.69742	6.90634	5.09573	5.98423	5.05823	6.41976	5.44311	6.94161	5.90986	5.70566	5.07462	6.0478	5.41316	5.50751	6.46508	5.85232	5.41912	5.997	5.62107
ENSG00000034677.13_RNF19A	8.33949	8.19301	8.5554	6.39084	6.49755	7.82409	7.49508	7.29456	9.02806	7.91317	6.46618	6.20235	7.32844	8.10701	9.50018	8.87841	8.57098	8.77778	8.5764	8.46797	8.33629	8.30324	8.49037	7.70245	8.57882	8.78002	8.60747	7.23443	8.82028	8.22896	8.72024	7.39226	8.88515	7.65061	8.40343	8.53456	8.81421	8.07923	8.46059	6.6035	8.54012	8.19493	8.35274	8.54897	9.3873	9.00891	8.70847	7.77598
ENSG00000034693.15_PEX3	5.88665	5.47869	6.10258	5.40209	1.7056	5.74383	6.15317	5.54732	4.50266	6.33745	3.571	3.41326	5.75413	5.07024	5.23987	6.15858	5.75001	6.76762	5.24082	5.26792	5.58283	5.90273	5.68643	6.13026	5.55996	6.12254	5.64231	5.65811	5.36164	6.01643	5.35591	5.83496	5.83548	6.53592	5.67111	6.39354	5.42278	6.00094	5.42474	5.59861	5.86847	6.15268	5.1704	5.09591	5.21682	5.53965	5.71771	6.39969
ENSG00000034713.8_GABARAPL2	6.9658	7.39996	7.93833	6.78695	7.91962	7.3404	6.89207	6.90844	7.74459	7.30171	8.11609	6.87572	7.13987	7.04891	8.13181	6.64735	7.80941	7.29879	7.75481	7.97871	7.55302	7.17458	7.59787	6.51569	7.29508	8.10457	7.51096	6.61383	8.32966	7.05453	7.99544	7.33034	7.70705	6.74123	7.59113	6.73849	7.83749	7.26814	6.74429	7.14809	7.26213	6.90059	7.4616	7.55194	7.13221	7.22983	7.275	7.16805
ENSG00000035115.22_SH3YL1	8.18145	8.09824	8.62991	8.06607	6.73357	7.1766	7.78714	7.30959	7.87606	8.70026	7.1464	6.96205	7.77695	8.45784	8.2866	8.11561	7.4369	7.5199	7.65762	8.33787	7.97914	8.1333	7.58092	7.94534	8.04573	5.46387	7.03679	7.48445	8.01698	7.32179	8.60459	7.21868	7.92465	8.46927	7.58997	7.22402	8.59608	7.96088	7.8937	8.02037	8.04197	8.24831	8.05801	7.98358	7.38712	7.99155	7.0756	8.17026
ENSG00000035141.8_FAM136A	7.29224	7.00724	7.36841	6.91379	5.65437	6.64365	7.61507	7.04916	6.78178	7.96351	6.479	6.20089	7.99522	7.66946	6.70485	7.18429	7.03174	7.82704	6.61138	7.47048	7.54637	6.98356	6.67161	7.21434	7.69414	6.70399	7.13568	7.61549	6.98698	7.46497	7.1186	7.75483	6.5788	7.21352	7.66981	6.84418	7.14424	7.03383	6.94106	6.56859	7.1989	7.39163	6.83352	6.35428	7.16204	7.7835	6.29564	7.18278
ENSG00000035403.18_VCL	9.84181	9.61107	9.8005	9.24696	8.8855	9.83976	10.1242	9.36127	10.9468	9.66492	9.4531	9.46381	10.1638	9.13117	9.99459	9.74405	9.93405	10.1734	9.43603	9.18561	10.1812	9.60339	10.9329	9.98237	9.78264	13.1576	9.71719	9.73894	9.4776	9.61639	9.7426	9.98383	9.23464	10.3134	9.94613	8.29324	10.5507	9.47195	10.4225	8.89519	9.23907	9.9636	8.98126	9.44155	9.52292	10.2444	8.85863	9.5572
ENSG00000035499.13_DEPDC1B	5.51824	5.9345	5.91567	6.89774	4.11153	4.75816	5.98044	5.63891	4.76466	6.37346	5.08458	3.8964	6.67557	5.69237	5.25071	6.82838	5.25427	6.1049	5.09576	4.2546	6.01235	6.27787	5.06967	6.53996	6.34462	2.75439	6.0545	7.18268	4.79572	6.25413	5.22799	6.20024	4.69324	6.64707	5.31112	4.85822	4.9981	6.22184	5.75246	5.97492	4.71889	6.02578	5.84178	4.8315	6.04493	6.72366	4.33651	6.77018
ENSG00000035664.11_DAPK2	7.69216	7.77656	7.37339	8.65218	8.28117	7.64427	6.56191	8.27588	9.11751	7.44614	8.93222	9.01448	7.76186	8.65308	8.6521	6.10454	8.58577	4.79576	8.99417	9.02501	7.12798	8.14889	7.25961	6.2006	7.37266	4.38382	7.70083	8.43774	9.02726	7.18978	8.91405	5.90892	9.02655	6.15571	8.08084	6.3302	8.83449	8.23218	7.49341	7.3762	8.35422	8.53213	8.29325	8.79889	8.46101	5.43179	9.94614	7.36339
ENSG00000035681.9_NSMAF	7.12472	7.1586	7.48092	6.40828	4.28024	6.93894	7.41192	6.18928	6.74277	7.48628	6.1685	5.8773	6.97273	7.40968	7.26538	6.93274	7.48095	6.95687	7.01335	6.91533	7.03779	7.66701	7.43312	7.06672	7.26298	7.8217	7.15435	7.51325	7.04155	7.31505	6.81585	7.35031	7.01769	7.22827	7.11504	8.09697	7.06333	7.12416	7.27086	6.15008	7.24637	7.53455	8.24567	6.51927	7.54023	7.4369	7.10901	6.89215
ENSG00000035687.10_ADSS2	7.45045	7.5529	8.21945	6.59045	6.58881	7.25604	7.50129	6.53996	8.19391	7.9759	6.69154	7.36885	7.76368	7.59161	7.98744	8.01421	7.82502	8.51919	7.2772	7.82733	7.9635	7.78995	7.53778	8.23994	7.82539	7.59489	7.49299	7.65466	7.86991	7.81532	7.65175	7.01764	7.36577	8.37898	7.7629	6.58191	7.77753	7.7448	7.35801	7.30642	7.41577	7.85137	7.5008	7.41447	7.44563	8.10888	7.03428	7.61567
ENSG00000035862.12_TIMP2	8.58587	7.43812	8.37052	7.37339	7.48109	9.35406	8.32103	8.28469	9.55058	7.99475	8.4729	7.80153	9.76078	7.27057	9.43595	7.72285	9.49866	9.17646	7.51214	8.72971	9.23811	8.77018	11.2498	9.17164	8.53679	12.0181	9.00155	6.83858	8.8294	8.59943	8.56396	8.73008	8.99695	8.9775	10.0799	8.36653	9.19032	8.05647	8.38882	7.46723	9.14343	6.37392	8.35052	8.9223	8.42163	8.3345	8.09981	7.59723
ENSG00000035928.16_RFC1	7.30296	7.37669	7.76366	6.89011	4.66275	7.06671	7.52837	6.2957	6.76286	7.51402	4.43576	6.08358	7.56264	7.57939	7.59919	6.86259	7.50158	8.27193	6.95626	7.8249	7.19245	7.97527	7.75823	8.11437	7.76274	8.583	7.60484	7.88162	7.46868	7.80166	7.36357	7.72649	7.61054	8.2341	7.71012	7.61623	7.17449	7.20725	6.86641	7.23931	7.74975	7.91747	7.51601	7.00365	7.72726	8.60633	7.65534	7.78956
ENSG00000036054.13_TBC1D23	7.21893	7.36674	8.07395	5.17658	6.76441	6.33993	7.20186	6.39638	8.45917	7.81043	7.57166	5.20723	6.81313	7.19329	8.06664	6.9974	7.5893	7.62478	7.14222	7.86453	7.7725	7.41007	7.54623	6.97591	7.64795	7.43271	7.72861	6.86296	8.04288	7.67228	7.79268	7.1379	6.97485	7.02751	7.89851	6.78461	8.62816	7.57053	7.46782	6.83523	7.43846	7.13031	7.355	7.62933	7.67481	7.52587	6.98698	7.09838
ENSG00000036257.13_CUL3	8.22177	8.38235	9.39007	8.14672	7.22883	7.21179	8.10864	7.84723	8.19822	8.97938	7.52216	8.09813	8.5392	8.35675	8.93643	7.95638	9.10463	9.10848	8.44606	8.49232	8.63674	8.44422	8.58371	8.32742	8.75094	8.81963	8.74092	8.39279	9.26221	8.41577	9.34123	8.04831	8.59748	8.56047	9.09211	7.27505	9.52861	8.67328	8.55093	8.25453	8.47258	8.57569	8.49334	8.74128	8.69165	9.05725	8.02693	8.59728
ENSG00000036549.13_ZZZ3	7.46597	7.39268	7.6023	7.09667	5.51321	7.26644	8.02953	6.341	6.35265	7.56618	4.93792	5.0726	7.40717	7.69665	7.25078	7.41882	6.97361	7.84579	7.06168	7.82255	7.18096	7.43019	7.60571	7.74611	7.88694	8.51414	7.68123	7.95095	7.02929	7.64074	7.48923	7.67562	7.01731	8.11254	7.53907	7.81783	7.01459	7.43396	7.63489	6.19425	7.84147	8.20612	7.80605	7.01969	7.36211	8.11496	7.08718	7.85664
ENSG00000036672.16_USP2	7.05852	6.8469	7.02862	5.09264	7.99028	3.74612	5.71441	5.55671	8.10583	3.91917	8.17142	7.77186	6.03749	5.90632	9.2589	2.86045	8.20452	3.81771	8.04012	7.7383	8.29628	4.80959	6.92757	3.6019	8.00243	4.7537	7.32289	3.59013	8.66269	5.28713	9.319	3.32868	7.24657	2.92077	8.83731	4.03248	9.65441	7.89042	6.86041	5.09748	7.71964	3.76605	7.34451	8.04276	7.72271	2.22332	7.58517	5.37451
ENSG00000037042.9_TUBG2	4.94054	5.03199	3.12746	5.7013	3.58998	6.04208	4.65155	6.4871	5.06839	4.99511	5.89217	6.07578	4.94591	6.50044	5.06714	6.37618	4.76665	5.54716	5.81152	6.49074	4.57771	5.80351	5.60689	5.80957	4.69102	6.99468	4.8324	5.70315	4.75857	6.33186	4.28757	6.33559	5.48063	5.71298	5.00351	7.75357	4.41457	4.1179	5.84009	5.19525	5.33498	5.92158	5.63088	4.51147	5.1215	5.21316	5.61377	5.74087
ENSG00000037241.7_RPL26L1	4.70901	4.7072	5.23368	3.20226	1.7056	3.73826	4.57435	3.44855	3.64035	4.96729	1.7056	1.7056	5.04374	4.75152	4.53723	4.87546	4.94984	5.90602	3.67111	4.64802	5.00299	4.7916	4.36241	4.84177	4.4137	4.20487	5.26207	5.01309	4.61476	5.01872	4.2908	4.63962	4.42549	5.16143	4.65864	4.46043	4.53048	4.47404	4.46176	2.89527	4.59944	4.9705	4.91238	4.07902	4.70805	5.134	4.18901	4.69334
ENSG00000037280.16_FLT4	5.06548	5.18645	4.56432	5.69553	1.7056	7.88348	6.34863	7.31112	5.42641	4.06729	5.66394	6.21516	5.97931	5.32346	5.17062	5.02778	6.06437	4.90281	4.86838	4.64818	4.46494	5.61749	6.80371	5.20323	4.44364	7.09675	5.5467	5.21166	4.50164	6.13517	4.65582	6.59245	6.63564	4.45267	5.36944	5.61881	3.7683	3.88242	5.89817	4.07027	5.14941	4.20849	4.42415	4.35823	4.30419	5.39867	6.04235	5.48502
ENSG00000037474.15_NSUN2	8.00175	8.17606	8.46575	8.55197	7.53864	8.82012	8.71048	8.38697	7.97178	8.52035	8.1348	8.052	8.89284	8.48119	8.02957	8.83858	8.17641	8.74384	8.27206	8.06066	8.32368	8.81947	7.76105	8.54917	8.44552	7.87609	8.19782	8.75608	7.91109	8.45308	8.38377	8.97616	7.9086	8.74197	8.55044	8.55976	8.33916	8.53565	8.03731	8.03994	8.10159	8.52917	8.54604	8.12348	8.47721	8.82132	7.93212	8.62415
ENSG00000037637.11_FBXO42	7.21572	7.10925	6.95283	7.75415	7.731	7.74123	7.79593	7.54511	7.18316	7.18005	7.43168	7.80375	7.38773	7.19761	7.4588	7.10536	7.37697	7.0865	7.56245	7.25605	7.17431	7.40004	7.45337	7.48302	7.24346	7.91225	7.49646	7.47941	7.40246	7.51453	7.32463	7.48445	7.51066	7.20116	7.26574	7.15883	7.29562	6.93115	7.2004	7.67771	7.41353	6.87767	7.23761	7.33705	6.99389	7.05199	7.61171	7.4632
ENSG00000037749.13_MFAP3	7.66047	6.8889	7.57772	6.81168	6.41187	6.46505	7.03797	6.39432	7.72317	7.04538	5.27459	5.25202	7.31893	6.94816	7.89669	7.0673	7.46659	7.40794	6.94903	6.87956	7.73046	7.19247	7.43256	7.09027	7.25791	7.25649	7.34746	7.45787	7.83713	7.09844	7.9446	7.35483	7.30433	7.0579	7.3834	6.63372	8.05082	7.7291	7.40487	6.27215	7.33548	7.43799	7.50098	7.27455	7.41876	7.52591	6.52009	7.15565
ENSG00000037757.14_MRI1	7.25843	7.58034	7.04854	8.23092	9.02426	6.54756	6.84637	7.71966	6.94302	7.52238	8.80793	8.92658	6.72113	6.87408	7.17222	7.84447	7.14516	7.90569	7.40524	7.12862	6.84146	7.11868	7.12334	7.27169	6.67515	7.74595	7.58257	8.00802	7.17976	6.67383	7.50275	7.75976	6.9009	7.33275	6.98629	8.45729	6.92734	6.62993	7.33402	8.37487	7.43015	7.83786	6.88329	7.34202	6.87023	7.15637	7.58059	7.75334
ENSG00000037897.17_METTL1	4.43792	5.48632	4.92766	5.98067	5.77451	5.41267	6.10804	6.07414	4.75368	5.9953	4.68849	4.94133	6.11083	5.76189	3.51077	5.37445	5.29047	5.98	4.23067	3.90509	5.41378	5.43415	4.51453	5.71298	5.57306	4.37686	4.97955	5.7656	3.9212	5.61854	4.30652	5.77733	3.94889	6.4511	4.73098	6.00335	4.71284	4.29386	5.21345	5.5794	5.06649	5.46334	6.27452	4.93588	4.50825	5.52184	4.64677	6.17297
ENSG00000038002.9_AGA	5.50351	5.79471	6.26741	5.39685	5.84816	5.60556	6.23434	6.29209	4.36894	5.35582	5.45151	4.0063	6.44138	5.98138	5.9298	5.27583	5.63863	4.66005	6.20028	5.81127	5.88465	6.07404	6.09068	5.90873	5.48993	6.23168	5.09214	5.45144	5.7153	5.82169	5.55257	5.06559	5.26416	6.02539	6.35525	5.08897	6.1873	5.71983	5.21404	5.93043	5.73992	6.34584	5.77284	6.23477	5.87212	5.14972	6.02372	7.1308
ENSG00000038210.14_PI4K2B	7.45518	7.57757	8.015	7.64481	8.378	7.43487	7.68583	7.818	7.75901	6.95365	8.01618	7.97856	8.17931	7.81847	7.88707	6.6309	7.35803	8.20217	7.35442	7.63739	8.01009	8.22126	7.21929	7.95067	7.94602	6.11631	7.73613	8.04797	7.70312	7.7255	7.68608	7.62279	7.70449	8.23964	7.8855	7.30565	7.96963	7.31754	7.06712	8.14599	7.71924	8.1988	7.51645	7.32007	7.63771	8.60702	6.96895	7.44901
ENSG00000038219.13_BOD1L1	8.80054	8.4475	8.34654	8.3275	7.38814	9.23992	7.99904	8.39114	8.89789	7.8594	7.91779	8.02334	8.27812	8.9398	8.96395	8.27138	8.49362	8.77728	8.58887	8.72802	8.20781	8.98676	8.97292	8.84797	8.46093	8.69514	8.92716	8.97346	8.99229	8.70759	8.81696	8.89274	8.97879	8.80093	8.49526	9.57435	8.48882	8.2732	9.14301	8.61148	8.71213	8.96556	8.67182	8.6489	8.85855	8.61431	9.60969	8.22553
ENSG00000038274.17_MAT2B	8.26927	7.89514	8.90107	5.696	4.43502	6.65111	7.77306	6.72021	8.08524	8.16448	6.08725	5.60635	7.66377	7.84411	8.52567	6.80799	8.27876	8.17307	7.73274	8.66817	8.10214	7.6046	8.06927	7.94109	8.52782	8.17167	8.14664	7.7478	8.57017	8.25132	8.51851	7.41662	8.28968	8.07823	8.39875	5.71818	8.32319	8.25237	7.59171	6.63449	8.37452	7.78337	8.2632	7.94231	8.28867	8.60404	7.51829	7.62986
ENSG00000038295.8_TLL1	4.89594	3.58075	5.09436	4.1492	4.99585	6.92776	4.7388	3.12386	4.97285	2.48849	4.82034	4.97511	5.71536	2.94431	4.33221	3.17172	5.83727	2.69744	4.23249	3.80805	4.42102	2.93539	6.2995	3.68001	3.53694	6.02813	5.34489	3.02926	2.84063	4.17751	4.07252	3.11287	4.85965	2.62928	4.88458	3.18257	3.04542	3.52956	4.96952	4.0018	4.23547	1.7056	3.16193	4.07733	3.96214	2.69673	4.39893	3.10218
ENSG00000038358.15_EDC4	9.10987	9.14568	8.62969	8.82927	9.32948	9.08419	8.97891	9.4343	9.68135	8.91464	9.04945	9.55896	8.87929	8.71052	9.14285	8.76314	9.18503	8.37398	9.49428	8.94119	8.86209	9.12038	8.83277	8.46502	9.17302	8.50729	8.93183	9.0402	9.40619	8.88986	9.60756	8.96622	9.4489	8.58237	8.84189	9.21956	9.1642	8.80257	9.404	8.93954	9.13387	8.58818	9.07569	9.29894	9.02958	8.45071	9.69775	9.09375
ENSG00000038382.20_TRIO	10.6684	10.3322	9.96104	11.0114	10.5858	10.9268	10.1559	10.8893	10.9805	10.6853	11.0678	11.028	10.1577	10.7613	10.8301	11.9016	10.7835	9.73725	11.0155	10.9939	10.2149	10.9739	10.4869	10.5312	10.6364	10.6083	10.9149	11.2853	10.7107	10.312	11.0704	10.974	10.8565	10.3614	10.4387	11.4497	10.5297	10.2466	10.9042	10.5044	10.8434	11.0177	10.6553	10.5789	10.7953	9.59566	11.5574	10.4469
ENSG00000038427.16_VCAN	6.71146	5.70631	5.96604	6.71741	6.11141	8.41788	6.0726	7.75249	6.15006	8.38762	4.90738	6.7679	8.07984	7.1118	6.71817	6.90423	7.46684	7.454	5.24498	7.31116	5.97806	8.06435	8.73517	8.36012	6.44435	9.2703	6.60786	7.19917	6.19444	7.87837	5.45542	10.7544	7.52774	8.14829	8.14771	8.00141	6.3629	6.77742	7.68694	7.71213	7.50025	7.35224	7.38639	6.57771	6.08602	7.97148	6.50397	7.71709
ENSG00000038532.16_CLEC16A	8.6147	8.39223	8.05529	8.68728	8.74409	8.41681	8.36999	8.31669	8.93301	7.82431	8.74095	8.79832	8.09589	7.948	8.66147	8.8914	8.6681	8.23878	8.84994	8.22364	8.11929	8.94451	8.33776	8.00493	8.50016	7.90758	8.62991	8.01148	8.54618	8.10634	8.76651	8.41074	8.69125	7.93933	8.30779	9.15083	8.71987	8.37238	9.05645	8.13567	8.44866	8.22936	8.91169	8.75048	8.6884	8.12232	9.00391	8.2121
ENSG00000038945.15_MSR1	3.85957	4.06173	3.88324	2.80581	1.7056	5.75959	5.25686	3.63414	3.52048	4.7896	4.57129	1.7056	5.08862	5.92472	5.06264	4.20467	6.44033	5.77428	4.89031	6.38914	3.89444	4.21311	5.02344	5.55453	4.89864	5.46223	4.42071	4.96426	3.03182	4.6797	4.52034	6.22739	5.82889	5.15495	5.22985	6.33598	3.72044	5.1203	4.39065	3.61946	5.69598	4.2581	4.35447	4.35082	4.92286	6.73095	5.78365	4.65757
ENSG00000039068.20_CDH1	12.0947	12.0936	12.5595	10.3767	11.7327	10.4416	11.5284	11.211	12.7265	12.2558	11.8781	10.8991	11.5399	11.7904	12.9054	11.2379	12.2056	11.2102	12.4006	11.4189	12.372	12.2666	11.781	10.9693	11.9788	4.90264	11.6471	11.0616	13.0941	11.1345	12.8555	10.6105	12.0226	11.2868	12.0959	10.6434	13.0481	12.2186	11.9128	11.292	11.7305	11.5098	12.1853	12.3805	11.5573	10.9985	11.6108	11.9782
ENSG00000039123.16_MTREX	8.04167	8.33058	8.53321	7.68127	7.14429	7.59189	8.1582	7.21497	7.56454	8.62711	7.53143	7.33036	8.49295	8.04309	7.69138	8.39115	8.02178	8.38378	7.87522	8.16686	8.20463	8.1167	8.22234	8.19808	8.42846	8.48776	8.25281	8.20949	7.8953	8.31534	8.09203	7.83315	7.76165	8.31011	8.09006	7.29922	7.85303	8.69105	7.97335	7.50965	7.9639	8.65023	8.00418	8.01514	8.27532	8.16651	7.67495	8.38684
ENSG00000039319.17_ZFYVE16	8.01467	7.38333	8.43945	6.36639	5.07389	7.00964	7.52881	6.17616	7.95558	8.27705	6.51033	5.40188	7.60282	7.88926	8.53546	7.92453	7.96261	7.93587	8.09999	7.63912	8.01984	8.34367	8.33588	8.12191	8.05804	8.78023	8.16968	7.93964	8.3278	7.82464	8.35656	8.00323	7.93624	8.24065	8.14971	7.29313	8.51989	8.34411	8.44006	5.93445	8.33976	8.37858	8.47939	8.29801	8.14696	8.52027	7.52566	7.85262
ENSG00000039523.20_RIPOR1	6.50983	6.3681	5.61357	7.23775	7.2539	8.22595	6.37425	8.03708	6.6079	6.8964	6.81721	8.2129	6.93357	7.0985	6.96279	7.17257	7.67453	8.0266	5.84503	6.83343	5.8698	7.81074	7.88276	7.23041	5.88322	8.89605	7.05748	6.80058	6.02006	7.85985	5.72777	8.16727	7.0371	6.87683	6.5354	7.88276	5.6478	6.13928	6.83077	7.83294	6.95343	6.13189	6.37987	6.34683	6.22196	7.67991	8.12345	7.72199
ENSG00000039560.14_RAI14	6.2681	5.3036	7.15585	5.69616	6.14268	7.36468	5.91678	6.38422	8.16327	7.89453	6.01748	5.59671	6.33433	6.69421	7.49829	5.9473	7.76051	6.92542	6.14587	7.13185	6.20123	6.86879	7.70359	6.61103	7.04154	9.15017	6.57335	6.13207	8.72199	7.60818	8.44126	7.59114	6.80188	6.60609	7.11617	7.33197	6.55459	6.56708	6.76252	5.93097	6.84487	6.01629	7.09626	7.47884	4.85924	6.88923	6.44472	6.08191
ENSG00000039650.12_PNKP	7.99495	7.63385	7.24182	9.14052	9.42655	9.13915	8.26021	10.0774	8.22765	7.35972	9.64865	9.90202	8.22014	8.50294	8.03144	7.6545	8.47896	7.64428	8.69902	8.16103	7.86256	7.74551	7.44851	7.70713	7.97359	6.80457	8.25618	8.73834	7.60295	8.5714	8.11666	9.20787	8.93203	7.59694	7.85433	8.97157	7.67729	8.03105	8.91299	8.45437	8.5695	8.16872	7.93733	8.37365	8.28701	7.41367	9.67946	7.89526
ENSG00000039987.7_BEST2	6.42151	4.77777	8.50753	3.75497	10.5597	5.74962	6.96546	5.72065	5.30481	3.96162	5.26416	6.80136	7.49651	4.15842	6.12177	1.7056	5.83093	2.63885	7.43032	5.72402	7.20265	3.53041	4.08853	3.4633	4.00178	2.33334	5.32765	3.28102	4.28276	1.7056	4.6815	1.7056	6.83569	3.43973	4.42185	1.7056	5.26933	4.8592	6.26153	4.60883	5.32806	4.92267	3.9979	4.54149	6.69195	2.67421	7.18155	3.03
ENSG00000040199.18_PHLPP2	10.0145	9.84284	9.96098	7.57067	9.23534	7.70742	7.80781	6.92881	10.548	6.99857	10.7497	8.87682	8.2629	8.37412	10.6914	6.74528	10.5007	7.1238	10.8606	10.1998	9.45026	8.0035	9.77855	7.52625	10.0247	7.39454	9.73019	7.67343	11.6182	8.05687	11.8765	7.44204	10.6171	7.53367	10.5164	8.38421	10.9123	9.77828	9.82897	8.08114	10.083	7.1606	10.4022	11.248	9.62187	7.76999	10.6423	8.29574
ENSG00000040275.17_SPDL1	5.35286	5.62362	5.61242	5.74016	4.21406	5.21592	5.62069	4.69896	4.2038	6.38125	4.61602	4.40043	5.93618	5.69614	4.75894	7.48096	5.17129	6.46558	4.52781	4.6204	5.9614	6.24671	5.0438	5.9933	5.51474	5.02269	5.77327	5.63539	3.93012	6.23006	5.07222	5.63557	4.93084	6.26797	5.38956	5.7504	5.32201	6.2747	4.98107	5.13119	4.7967	6.00266	5.63559	3.80837	5.67667	6.62658	4.1845	6.12673
ENSG00000040341.18_STAU2	7.61449	7.66643	7.75569	6.03567	5.81761	6.86595	6.87836	6.67314	7.5924	7.5717	5.35399	5.94745	6.7379	7.72043	8.0497	8.07173	7.21262	6.87422	7.7073	7.71807	7.2456	7.52674	7.79196	7.2395	7.51892	7.88954	7.5546	7.26193	7.59391	7.204	7.63727	7.1745	7.46168	7.10566	7.68361	8.86557	7.95791	7.02133	7.85248	6.70963	7.48914	7.8405	7.92165	7.19727	7.86983	7.79478	7.19786	6.77519
ENSG00000040487.13_SLC66A1	6.39564	6.30727	5.39342	7.139	7.96693	6.70256	6.43088	7.5593	6.87513	5.49198	7.59514	7.37858	5.98551	6.2693	6.58042	5.92671	6.1356	6.49492	6.93805	6.36891	6.21638	6.3478	6.28344	5.85932	6.07845	5.61717	6.1162	6.21898	6.52725	6.37816	6.44089	6.40011	6.67088	5.8124	5.76422	6.84544	6.30426	6.26575	6.74665	7.11865	6.51125	5.66364	6.19487	6.75048	6.25998	6.27091	6.46071	6.4232
ENSG00000040531.16_CTNS	6.47063	6.0231	5.91403	6.39777	8.88176	7.03891	6.81375	6.56845	6.86035	4.99465	7.23682	6.96483	6.29241	5.87176	6.63402	7.26372	6.34463	6.90812	6.76721	5.54212	6.31824	5.22301	6.29829	6.63349	6.65579	6.45559	6.39875	6.82998	6.79824	6.293	6.7899	6.61621	6.22242	5.82521	6.14908	7.30394	6.3455	6.21126	7.71699	6.46654	6.37024	6.0737	5.95759	6.53934	6.43291	6.38433	6.88778	6.12861
ENSG00000040608.14_RTN4R	4.9761	3.66789	3.96853	4.15965	4.23029	5.29264	5.08503	3.84957	4.93532	4.33113	1.7056	1.7056	3.46412	4.12828	4.35847	3.89044	4.03757	5.26506	3.67965	3.45119	4.91141	5.32446	3.59849	4.45675	4.11094	3.04987	3.71774	4.45003	3.551	4.54615	4.1521	5.25696	2.58085	4.80579	3.57568	4.01014	3.1998	4.22237	4.4528	4.98068	4.32409	4.37416	4.19294	4.31889	2.70617	4.60806	2.74807	5.15099
ENSG00000040633.13_PHF23	6.71603	6.52073	6.98857	5.7411	6.65783	7.28577	6.96918	7.10215	7.33389	6.83973	7.29335	7.09127	6.88965	6.41336	7.72658	6.71225	6.87859	6.9095	7.22311	7.12718	7.27088	5.82388	6.71239	6.76228	6.85055	7.29037	6.75166	6.99059	7.18427	7.25648	7.35669	6.57241	6.78361	6.81222	6.82823	6.85643	7.24253	6.60065	6.83887	6.35899	6.91698	6.11949	6.8217	7.43407	7.09935	6.95383	7.04934	6.5751
ENSG00000040933.16_INPP4A	7.29256	7.87835	6.62627	8.36814	6.17725	9.09503	7.60114	8.75599	7.77034	7.12202	6.8952	7.85815	6.95569	7.83367	7.66543	8.12568	8.6617	8.04861	7.84653	7.68871	6.91968	7.37908	7.87913	8.02351	7.69543	9.1087	7.27359	7.81765	7.4672	8.06006	7.37533	7.77169	8.65205	7.66749	7.50388	8.79247	7.3304	8.11692	8.412	7.16544	7.54969	7.55385	7.46651	7.99295	8.49825	7.6768	8.57744	7.45102
ENSG00000041353.10_RAB27B	7.02539	6.33691	7.39356	3.99358	4.66788	5.75126	6.48942	4.72731	5.30407	5.78348	5.23275	4.4287	6.74403	6.41867	6.51655	6.53003	6.09653	8.78944	6.0339	8.03889	7.37846	3.97156	5.79892	5.19934	6.66691	4.3216	6.86564	6.20975	5.82785	6.39783	6.33577	6.92847	6.6871	4.82718	6.97758	4.26111	7.00172	6.96033	5.97562	3.41694	6.64993	6.93341	5.68336	6.02866	7.86939	8.83176	5.7202	4.54127
ENSG00000041357.16_PSMA4	7.73575	7.77892	8.59092	6.38709	5.47468	6.62837	8.01495	5.95509	7.43492	8.39248	6.29742	6.41936	8.56817	7.83598	8.14182	7.06037	8.01363	9.03337	7.33978	8.26264	8.35456	7.82925	7.76848	8.36215	8.35097	8.03352	7.98017	8.01984	8.08354	8.64076	8.35195	7.79697	8.43514	8.74351	8.43421	6.14481	8.64371	8.77493	7.06847	5.20813	7.83545	7.78787	7.90252	7.58098	8.33846	8.91319	7.52246	7.54657
ENSG00000041802.11_LSG1	7.64434	8.46369	7.90235	8.8996	6.85368	7.68154	8.2065	7.74799	7.95951	7.36068	7.20279	7.13013	8.26793	7.60047	7.67387	8.47727	7.41013	7.86965	7.84303	7.34362	7.72794	7.99294	7.26073	7.75534	8.14667	7.43169	7.70543	7.92685	7.70415	8.15909	7.82272	8.19916	7.14392	7.81668	8.01153	8.34262	7.71433	7.26082	8.04401	8.00805	7.6703	7.95405	7.87861	7.57275	7.38888	7.4778	7.97949	8.49899
ENSG00000041880.15_PARP3	6.68595	6.96259	6.57853	6.37572	6.54885	7.01636	6.9187	7.60905	7.20067	5.87912	6.89326	7.83376	6.66117	6.96338	7.28981	5.36015	7.14122	6.7656	6.63588	7.59306	6.93588	7.08379	6.76809	6.89542	6.91528	6.55813	7.04342	7.56529	6.60192	7.38233	7.24156	7.48303	7.62518	6.88181	6.97088	5.75767	7.52096	6.92337	7.06881	6.49242	7.33908	7.37608	6.5467	7.08346	8.2691	8.59235	7.74493	6.3513
ENSG00000041982.16_TNC	5.90206	6.31195	5.22622	8.01241	3.95087	10.5373	6.96122	8.68396	5.32331	9.01386	7.55615	7.01509	6.01807	6.13514	5.59594	7.87976	7.0124	7.25723	4.97643	5.97869	5.16754	6.4965	9.90766	8.03928	5.70274	12.9699	6.50299	6.45269	4.57124	9.66093	5.08025	9.31513	6.28292	7.84041	7.42834	7.09019	4.72212	5.85538	6.50527	7.0057	6.01389	7.07238	6.92005	6.04678	6.19846	8.02659	4.96971	6.64548
ENSG00000041988.15_THAP3	6.27987	5.90017	5.59926	5.69517	6.51786	6.69856	6.48339	5.95339	6.26146	5.99848	6.68405	6.78307	5.6759	5.88963	5.72298	5.94027	6.53938	6.24636	6.33553	6.19954	5.53518	5.59295	6.23467	5.28288	5.62888	6.25729	6.3801	5.53027	5.45802	5.71035	5.71934	5.80007	6.26847	5.59175	5.71842	5.40107	5.62788	5.37824	5.78677	5.91862	6.01541	5.25686	5.42945	6.06513	5.70111	5.95439	6.02369	5.83235
ENSG00000042062.13_RIPOR3	5.31017	4.5884	3.66698	6.48401	4.25456	7.80203	4.90287	7.76084	5.3654	5.63686	5.44688	6.69585	4.83885	4.70124	5.5517	3.59751	5.92614	4.46252	4.77586	5.09753	4.5362	4.77872	6.06164	5.4094	4.44647	6.33556	4.95576	4.83425	4.65076	5.9944	5.04758	5.17225	6.0693	4.95314	5.98585	4.3626	4.86259	4.64028	6.07795	5.5915	5.40422	4.50771	4.34016	4.9967	4.87705	4.8028	6.85166	5.36963
ENSG00000042088.14_TDP1	6.55522	6.69583	6.16891	6.06579	1.7056	6.49211	6.27145	6.00492	5.51855	6.69149	4.56684	5.05001	6.62879	6.78414	6.25915	6.7955	6.16789	6.52344	5.86472	5.86556	6.07971	6.74893	5.80632	6.96844	6.38548	5.26973	6.51687	7.55805	5.53214	6.86348	5.90656	6.96988	5.36653	7.14111	5.94855	7.71883	5.84606	6.96394	6.92377	6.00849	6.33127	6.59932	6.13204	5.46377	6.83372	7.01973	6.66663	7.2021
ENSG00000042286.15_AIFM2	7.08083	7.35264	7.40674	7.24445	7.69532	7.02579	6.8432	6.79495	8.30809	7.16293	6.58455	7.35792	8.29479	7.44259	7.82026	7.104	7.69239	7.70624	7.97245	7.24578	8.30812	7.54534	7.3065	7.58565	7.56269	6.73505	7.1439	6.63616	7.91503	6.89654	8.34819	6.72983	7.4832	7.49487	7.99758	6.18908	8.97476	7.48016	7.37788	6.47811	7.46137	6.83361	7.23645	7.93342	6.79218	7.0068	7.60336	6.95756
ENSG00000042317.17_SPATA7	4.78504	4.13822	4.10903	1.7056	1.7056	3.76236	3.22382	3.79342	4.07929	4.91321	3.06525	1.7056	3.82755	4.64618	4.46405	4.21462	4.76458	4.19086	3.50033	4.92533	3.91805	4.75691	5.36989	4.54232	4.31976	5.31401	4.55956	4.33133	3.66126	3.9744	4.13059	3.96824	4.88399	4.88157	4.4427	4.95119	4.18252	4.64483	4.28145	3.19589	4.91688	4.98827	4.62016	3.9182	3.88382	3.50197	4.43577	4.48974
ENSG00000042429.12_MED17	6.801	6.41051	6.32426	6.79525	7.96601	7.24222	6.77663	6.91166	7.12422	6.85806	6.10322	7.6102	6.80645	6.23143	6.75475	6.94273	7.06214	7.35688	7.09888	6.64654	6.75063	6.90689	6.59707	6.80444	7.15538	7.24327	6.88684	6.72586	6.49311	6.51012	6.62424	7.6467	6.80109	6.74689	6.59943	6.63939	7.0117	6.86307	7.08877	6.46485	6.79907	7.27481	6.63117	6.77909	6.67631	6.86199	6.92207	6.60765
ENSG00000042445.14_RETSAT	10.333	10.3454	11.0842	7.48206	11.1992	8.40649	9.51279	8.88425	11.1078	8.46924	10.8411	8.63273	9.92158	9.39122	11.6845	7.738	10.5534	9.09846	10.8616	9.53798	10.7391	8.00713	10.0674	8.05793	10.3556	7.85236	10.0831	8.07687	11.9787	8.9526	11.6164	8.24918	10.4094	7.89235	10.4795	7.87752	11.6543	10.0218	10.0243	8.08414	10.0523	8.77988	10.0743	10.9118	9.54387	8.44301	9.5634	8.17331
ENSG00000042493.16_CAPG	7.8318	8.44884	8.88217	7.49654	8.63063	7.52596	8.36992	8.49323	7.58495	9.10493	7.57208	8.82573	8.81469	9.03873	8.26388	8.15532	8.56194	9.0172	8.68409	8.80556	8.74142	7.65105	7.60789	9.34138	7.69687	5.82314	7.7479	8.02063	9.31066	9.67221	7.82261	7.90103	7.79756	9.30432	8.23298	8.42298	9.26251	8.86934	7.56885	8.34208	7.9808	8.34371	7.85195	8.32819	7.52197	8.51127	7.80335	8.18982
ENSG00000042753.12_AP2S1	7.65428	7.78191	8.10848	7.61967	7.69326	7.33215	8.01946	7.61394	7.08281	8.19449	8.70029	8.34591	8.38509	7.74569	7.73719	7.04973	7.91364	7.33334	7.9241	7.85288	8.13773	7.25962	7.53884	7.84075	7.82704	7.21518	7.89648	7.67653	7.7724	7.80979	7.76393	7.96833	7.68573	8.11231	7.82339	6.81926	8.13655	7.78735	7.04593	7.9196	7.63571	7.38083	7.4226	7.83967	7.3188	7.65246	7.26109	7.74203
ENSG00000042832.12_TG	3.6885	3.92743	2.91696	6.39549	5.20957	7.55959	3.45129	7.35674	3.90689	7.86927	2.97331	6.97196	3.64722	6.59612	2.8559	4.83918	3.32049	2.89157	4.38038	3.50208	4.12449	7.45014	3.3777	6.7399	3.08822	4.40134	3.53026	7.09669	3.42557	5.01433	3.01855	5.46499	3.27248	6.3185	2.90311	6.58059	2.85449	3.19581	4.23033	4.32621	2.91007	5.29541	4.36186	4.16511	3.63669	3.64344	4.05081	7.23617
ENSG00000042980.13_ADAM28	5.47437	4.29843	5.43112	3.47448	1.7056	6.36134	4.57042	4.02614	5.15682	3.75591	3.65405	4.71454	5.22412	4.93643	4.30951	3.62882	6.23659	8.47766	5.16639	5.88609	4.85653	5.78489	4.83345	4.90618	5.05948	4.84207	5.55904	4.147	5.42253	6.90856	5.81139	4.93748	6.45345	4.36937	5.69284	4.48396	5.83378	6.89087	6.28178	5.41254	6.43593	6.06453	5.25629	5.26164	6.04277	8.18263	9.02497	5.28257
ENSG00000043039.7_BARX2	5.57548	5.68861	6.56537	4.15929	5.67674	4.89188	5.57018	4.86617	8.11915	4.99492	4.4357	5.39072	4.94591	4.81958	6.27101	3.79468	6.60547	5.01069	6.47242	6.35427	6.27718	3.61515	5.42401	2.35083	5.60769	1.7056	5.61779	3.62299	7.47103	6.27092	6.82173	4.98165	6.24213	2.32297	6.03992	3.02602	7.1477	6.4869	5.92164	5.19713	5.68486	5.10156	6.08989	7.69752	5.87279	5.33083	5.89946	4.5372
ENSG00000043093.15_DCUN1D1	7.66995	7.83739	8.2589	6.9054	5.02512	5.95863	7.58939	5.92673	7.93682	7.35784	5.92384	6.19408	7.89917	7.53497	8.35457	7.86511	8.17569	8.07149	7.73023	8.25363	8.15594	7.95957	8.06532	7.70245	8.26265	8.72227	8.08091	7.50754	8.44681	8.07074	8.53969	7.20679	7.99373	7.91473	8.51977	6.87943	8.94283	8.144	7.47423	7.04148	8.01536	8.34857	8.13053	7.92819	7.86683	8.12255	7.35552	8.10056
ENSG00000043143.22_JADE2	7.637	7.65216	7.36611	8.58752	8.93791	8.00409	8.01448	8.16852	7.61257	7.33008	8.8331	8.87428	7.61815	7.99669	7.55918	8.67327	7.85504	8.97998	7.86946	8.22027	7.52052	7.96789	8.1241	8.99301	7.5731	8.80071	7.46565	8.08745	7.89697	8.25008	7.5216	7.81852	8.69751	8.89308	7.74557	8.36991	7.73946	8.64678	7.17664	7.93443	7.917	7.68976	7.96478	8.30141	8.22381	9.25491	8.86545	7.81069
ENSG00000043462.13_LCP2	5.85444	4.51288	5.34264	4.58062	1.7056	10.4943	5.06723	6.43167	5.12462	6.75509	5.8247	5.07357	5.54721	6.42697	6.04792	6.5492	7.22161	7.15466	4.93687	6.9683	5.11056	5.66224	5.3886	6.58125	5.60373	5.49173	6.06322	4.82735	6.45897	8.52826	5.55048	8.36015	7.40424	5.6023	6.2658	6.05102	5.30063	5.859	6.01681	4.23144	6.84425	5.54094	6.7692	5.74531	7.89759	6.96574	6.49775	5.0137
ENSG00000043514.17_TRIT1	5.30468	6.25481	6.1166	6.41634	3.51439	5.72402	6.21435	5.51163	5.17444	6.55657	4.99224	5.92034	6.25314	5.77957	5.35398	6.37908	5.95419	6.44282	4.59071	5.85562	5.8229	6.20146	5.75624	6.6201	6.03852	6.1824	5.89163	6.52098	5.89939	6.01947	5.74301	6.92614	5.53586	6.76788	5.9093	6.20409	5.90794	6.82043	5.78251	6.01521	5.48468	6.77844	5.803	5.48997	5.50004	6.38287	6.13338	6.65663
ENSG00000043591.6_ADRB1	4.12032	2.89521	3.58755	4.16581	4.2329	4.97339	4.21615	3.50784	3.64566	2.59651	1.7056	1.7056	4.25627	3.07404	4.08561	4.75049	4.53715	3.94455	4.09651	4.47126	4.07965	3.5036	4.71084	2.3508	3.04663	6.44891	4.38279	4.5067	4.55412	6.54731	3.63638	5.10422	4.38356	2.75711	3.96358	2.65551	3.97836	4.68644	4.45091	4.66046	4.24642	3.53774	2.82217	4.01168	3.60425	5.80597	4.87383	2.84653
ENSG00000044012.4_GUCA2B	7.82755	7.74902	7.99547	2.78042	8.32285	6.32468	5.39612	4.49376	10.8491	3.75382	8.61709	6.81561	5.6785	5.09804	9.02213	1.7056	8.06071	2.63624	10.1343	7.74715	8.08404	3.11615	8.35364	4.04419	8.53502	2.32322	7.66393	1.7056	9.38728	2.71846	9.60088	1.7056	9.51744	3.07077	7.84334	1.7056	9.80977	7.26174	8.08021	4.9674	8.07698	1.7056	8.15658	9.92857	7.34496	3.17656	7.89411	3.58133
ENSG00000044090.12_CUL7	7.93985	7.87339	7.07582	8.05701	8.11513	8.52574	7.79923	9.15743	7.59654	8.26792	7.93766	8.4844	7.49827	8.38781	7.4639	8.33396	7.73286	8.55479	7.65924	8.01166	7.4775	8.51462	7.62429	7.79842	7.10135	8.00673	7.40725	8.61831	7.28851	8.33568	7.59993	9.29361	7.69513	7.88972	7.47957	9.41187	6.80217	7.75057	7.9037	9.71197	8.13494	8.30923	7.38767	7.9902	7.64565	8.2483	8.05327	8.26127
ENSG00000044115.21_CTNNA1	11.0441	10.9238	11.2192	9.96879	9.85728	10.2284	10.8038	10.5444	11.5074	11.2977	10.8119	10.5706	11.2317	10.8021	11.5989	10.5463	11.2853	10.8781	11.4857	11.1859	11.7118	10.6788	10.9757	10.3347	11.1473	10.8019	11.1115	10.316	11.5679	10.78	11.5755	10.1645	11.1682	10.6237	11.515	9.76869	12.4568	11.1775	11.2116	10.3288	11.0127	10.623	11.1114	11.3913	11.0238	10.7211	10.3819	10.762
ENSG00000044446.12_PHKA2	8.50009	7.40396	7.84874	8.95791	8.04352	7.95763	7.44533	8.36173	8.08477	8.00395	8.21905	7.13536	7.03678	8.03213	9.40264	7.76967	6.9687	7.14402	8.01308	7.34255	6.92214	7.96257	7.40001	7.94586	7.39414	6.93209	8.61104	7.79328	8.69291	7.69729	8.24026	9.38792	7.78631	7.82095	6.90509	8.66354	6.57707	7.32238	9.00396	7.8786	8.5024	7.23817	8.11951	8.21977	7.73938	7.09148	8.18032	7.71009
ENSG00000044459.15_CNTLN	4.46753	3.6489	4.44751	4.34529	3.66043	4.68294	3.47194	4.50094	4.08389	3.891	4.90257	1.7056	4.83868	4.92645	4.2532	3.5776	5.40817	3.82585	3.8601	4.55042	4.39069	4.78961	6.01408	3.83193	5.04489	7.12861	5.00075	5.15935	3.41003	4.58316	4.54684	5.68357	5.0927	4.33341	5.31249	4.69671	4.58232	4.32897	5.04658	3.74831	5.56806	5.89146	4.89692	4.56705	5.31075	5.6027	4.9033	3.41179
ENSG00000044524.11_EPHA3	3.74395	3.32884	4.2878	3.58576	1.7056	4.26332	4.78848	4.0228	4.37323	1.7056	1.7056	1.7056	4.19389	4.14135	4.23034	4.11542	5.25199	2.87887	1.7056	4.77958	3.90711	4.35879	5.93929	2.99517	4.60915	7.08509	4.79804	3.47919	3.89405	4.25911	3.8589	3.141	5.06963	2.81117	4.72634	4.31994	3.90304	3.26984	4.46595	1.7056	4.92695	3.10928	3.6469	3.21491	4.31239	4.24554	3.03734	4.03473
ENSG00000044574.9_HSPA5	10.438	10.5729	10.8182	11.1211	9.32545	10.4543	10.9842	10.3325	11.1459	11.3657	9.94045	9.64378	11.8847	10.5912	9.90008	10.6084	10.5287	11.6799	10.1378	9.75749	11.5865	10.4748	10.0459	10.4378	10.2849	10.4703	9.46637	11.4753	10.1839	11.2741	10.0084	11.031	9.77902	10.5962	10.8301	9.61459	11.5577	10.9461	9.69157	10.7523	10.0658	10.9543	10.3986	10.7531	10.2645	12.1766	9.39445	10.9637
ENSG00000046604.14_DSG2	11.4931	11.3224	11.971	9.93041	11.1088	10.0544	11.0341	10.4519	12.1313	11.1282	10.5528	9.20101	11.1117	11.3137	12.5217	11.8605	11.3555	11.0666	11.2241	10.7445	11.9232	11.1421	11.0169	11.02	11.3164	5.9052	11.1383	10.972	12.2728	10.3125	11.8437	9.63798	11.1773	11.521	11.3543	9.05464	12.4033	11.2279	11.1527	9.86156	11.0995	11.1536	11.51	11.4427	11.106	11.489	10.317	10.9039
ENSG00000046647.14_GEMIN8	5.41721	6.01485	6.30316	6.22416	3.68745	5.06853	4.98465	5.00434	5.40631	6.12103	3.86245	3.50225	5.3863	6.14183	5.15832	6.70589	5.66998	5.65414	5.01104	5.97656	5.64328	6.34934	5.95872	6.25524	5.47829	5.94903	5.80411	5.55038	4.84868	6.17116	5.60241	6.02426	5.17398	6.60368	5.9288	6.187	4.53528	6.13229	5.65198	6.08319	5.8534	6.27732	6.02385	5.59223	5.75017	5.29569	5.75198	6.0248
ENSG00000046651.16_OFD1	7.87208	7.23432	7.52282	8.01598	8.46709	7.874	6.93773	7.95747	8.69854	7.45565	7.14817	6.52915	6.7118	7.99891	7.42573	8.07478	7.44712	7.19619	7.88667	7.90285	7.16862	8.35299	7.57294	7.96584	7.41397	6.67224	7.49567	7.21562	8.19246	7.28313	8.1332	8.10267	7.80403	7.92083	7.02954	9.04216	7.50772	8.0165	7.91921	8.1363	7.81457	7.65333	7.99394	7.86161	7.72545	7.11948	8.07236	7.67261
ENSG00000046653.15_GPM6B	5.49884	5.04529	4.52114	4.12779	4.12684	4.97324	5.10147	4.50865	5.6763	4.89477	4.6902	3.33592	4.97297	4.23416	5.34195	4.58271	5.28331	4.05284	4.9464	4.82212	5.53793	5.23955	7.72055	5.29555	5.46672	9.15323	4.84491	4.80853	5.13242	4.30896	4.81626	5.01826	4.59349	4.88827	5.85982	5.0248	4.85756	5.18769	5.71108	4.35962	5.28046	4.82344	4.83804	5.23705	5.14406	4.97313	4.99203	5.00789
ENSG00000046889.19_PREX2	6.06029	4.59183	5.67373	5.41255	1.7056	7.09328	6.25527	5.72636	6.33513	4.99288	6.1112	4.74621	6.77324	4.87713	5.96656	4.65071	6.95397	4.18516	5.28174	6.81363	5.87793	4.77855	7.94604	4.94088	5.35761	8.02122	6.87626	4.39599	4.84645	5.95655	5.26143	6.42788	6.7384	4.66196	6.06202	5.52104	4.6499	4.9738	6.48486	4.23783	6.49795	4.62713	4.41836	5.17694	5.92402	5.5376	6.0284	5.1849
ENSG00000047056.16_WDR37	7.82046	7.33512	6.89041	7.50342	7.15896	7.81148	7.59459	7.07284	7.69573	6.65479	7.83049	6.66333	6.95775	6.78617	7.49045	7.43877	7.16077	7.13599	7.6225	7.15296	7.49775	7.03877	7.48911	7.61486	7.36127	6.945	7.99025	7.0983	7.41399	7.2353	7.78781	7.58441	7.54372	7.31194	7.42192	7.56868	7.64978	7.32838	8.01048	6.92809	7.63418	7.39233	7.32233	7.66613	7.95129	7.29556	7.60696	6.78813
ENSG00000047188.16_YTHDC2	8.12114	7.78257	8.20093	7.07546	6.24522	7.79769	8.28722	7.13508	8.01065	7.81707	8.30941	7.00106	8.27537	7.74535	7.73745	8.00031	7.47143	8.40695	7.84946	7.61647	8.13024	7.80093	7.89094	7.7656	8.24688	7.89362	8.0912	7.82554	7.98829	7.84707	8.31815	7.76936	7.90488	7.7232	7.98964	6.62276	8.30959	8.04269	8.15103	6.17134	7.82205	8.27536	7.59579	7.92056	8.25372	8.50204	8.07188	7.92872
ENSG00000047230.15_CTPS2	7.28881	6.96512	7.05303	7.46384	5.97929	6.84717	6.82964	7.05629	6.95726	8.1086	6.07225	7.31964	6.92652	7.7309	6.97457	7.51538	6.63141	7.50383	7.11459	7.40298	6.78145	8.23905	7.1112	8.19411	7.1492	7.3557	6.77999	7.32011	6.75497	6.89133	6.7543	7.44982	6.67152	8.35836	6.78976	7.61191	6.78014	7.579	6.95701	7.87183	6.81907	7.62972	7.24927	6.79101	7.10616	7.29597	6.76463	7.73793
ENSG00000047249.18_ATP6V1H	7.16496	7.6459	7.46785	7.58472	8.18141	7.05913	7.3572	7.63421	7.23801	7.20389	7.7701	7.74115	7.25881	7.67558	7.84799	7.52618	7.41756	7.8441	7.50488	7.68128	7.44113	7.63033	7.34174	7.04609	7.30217	7.87094	7.36177	7.17565	7.50446	7.15277	7.40835	6.65022	7.01639	7.17347	7.17126	7.63091	7.46572	6.74484	7.00254	7.21874	7.30697	7.30955	10.1918	8.64583	7.22675	7.45197	6.97506	7.3026
ENSG00000047315.17_POLR2B	8.48392	8.56086	8.96329	8.32711	5.85334	8.30298	8.78143	7.46905	7.92303	8.31629	7.24015	7.9019	9.00044	8.46232	8.3686	8.26782	8.3762	9.24768	8.23281	8.44184	8.68236	8.59245	8.60484	9.01389	8.75701	9.07215	8.67967	9.0445	8.4517	8.91423	8.56137	8.61314	8.21102	9.33335	8.59086	8.37617	8.67611	8.45118	8.3462	8.00316	8.34146	8.89908	8.52707	8.12768	8.60619	9.21363	8.36205	8.97586
ENSG00000047346.13_FAM214A	8.37084	7.32487	8.17977	6.96104	9.70775	6.88472	7.62117	7.36594	8.27406	6.09102	7.88086	8.32848	7.19589	7.16568	8.20455	7.17394	7.69578	7.72518	8.06988	7.9257	8.31474	6.90177	8.36736	6.6964	8.10775	8.12837	8.11363	6.86983	8.3254	7.20081	8.08996	7.72695	7.67042	6.39186	7.78355	7.33791	8.34346	8.09683	8.24798	6.81083	8.31417	7.53873	7.4976	7.70484	8.33004	7.43097	8.0765	6.21567
ENSG00000047365.12_ARAP2	8.22474	8.18046	7.69173	7.03468	6.24669	8.38083	7.86853	7.72955	8.54821	6.9053	6.67096	6.17756	7.74541	8.18557	8.50245	7.69005	8.17075	9.11269	8.43069	8.42633	8.09911	8.37898	7.74653	8.3178	8.25821	6.70704	8.03312	8.16865	8.14178	8.24883	8.42044	8.05637	8.56034	8.36232	8.17573	8.40046	8.84504	8.18829	8.72589	6.55052	8.04302	8.15635	8.96893	8.63917	9.12671	9.14797	8.57557	7.25066
ENSG00000047410.14_TPR	9.10474	8.74615	9.0766	9.48511	10.3031	10.1598	9.18957	9.47331	9.41167	9.43741	9.78233	8.83715	8.86675	9.37507	9.0117	10.4514	9.11776	9.74533	9.123	9.43303	8.80151	9.73779	9.31814	10.0973	9.25719	9.50699	9.23247	9.7628	8.98239	9.2207	8.95251	9.56135	9.30143	10.1749	9.11206	10.0327	8.76784	9.66193	9.33654	10.2875	9.22346	9.5233	9.00783	8.88924	9.19944	9.68699	9.52763	9.38989
ENSG00000047457.14_CP	4.90091	3.06808	3.96989	3.23455	1.7056	3.58001	4.93605	1.7056	4.73651	4.99348	1.7056	1.7056	5.30967	2.5153	5.84426	4.64952	5.56127	4.80573	3.05309	3.92895	5.31705	2.70897	6.60474	2.96624	4.59867	4.81051	4.82744	2.42779	4.7081	5.16108	3.83098	1.7056	4.69654	2.56928	6.65941	1.7056	3.32652	3.93679	4.96156	2.59669	5.5948	5.09576	2.82151	3.34299	4.18034	8.18968	4.05145	2.6454
ENSG00000047578.13_KATNIP	8.63621	8.65173	7.70354	8.41299	8.14621	8.76766	8.19509	9.0892	8.99212	7.89901	8.37776	8.81669	7.64628	7.97328	8.49815	8.77281	8.69524	7.72944	8.83061	8.76911	8.20282	8.62388	8.25469	6.98278	8.24875	7.41149	8.53662	8.21458	8.49092	8.03575	8.69905	8.37909	8.90598	7.01209	8.38071	8.82192	8.63219	8.38221	9.1028	8.68273	8.2071	8.11215	8.47506	8.72338	8.59152	7.77001	9.43026	8.42779
ENSG00000047579.20_DTNBP1	5.79765	5.99372	5.89943	5.93906	1.7056	5.89541	6.47604	6.36597	6.45884	7.11614	4.97473	5.39773	6.20807	6.02042	5.74846	6.2752	6.27944	5.94269	6.14161	5.56314	6.01272	6.53873	6.32209	6.27139	5.66502	6.61732	5.78093	5.90822	6.47096	6.27021	6.58954	6.22703	6.2122	6.50107	6.0011	6.08361	5.82223	6.06869	6.14757	6.97183	5.94774	5.97426	5.92522	5.85679	5.89281	6.22953	5.82853	6.45873
ENSG00000047597.7_XK	8.88782	8.48443	9.27195	7.51953	7.85596	5.11699	8.71738	7.77193	8.1003	7.30258	8.40403	7.0255	8.89265	8.35861	9.08956	6.95513	8.48776	7.23167	8.71939	8.09716	8.65435	7.22176	8.45398	8.59195	8.64215	8.2972	8.32449	7.61433	9.25598	7.24521	9.13428	5.85674	8.38685	8.84422	8.86972	6.98559	9.3521	8.6218	8.01501	8.04959	8.28821	8.38433	8.42931	8.74174	8.36941	7.28739	7.20322	8.0902
ENSG00000047617.16_ANO2	4.48342	3.24274	3.24675	3.83469	1.7056	5.27144	4.14434	5.79295	4.54622	3.68683	1.7056	3.95105	4.14224	3.72128	3.35748	4.0744	5.4727	3.40716	3.00912	4.49791	3.76824	3.90438	4.94832	2.92499	2.83788	4.73031	4.92452	3.54587	3.37371	4.36087	3.76797	4.44521	4.57076	3.00303	4.63917	4.87172	3.00724	3.67105	5.06117	2.56768	4.01105	3.1826	4.25174	2.95928	3.25866	3.98197	3.98333	3.23225
ENSG00000047621.12_C12orf4	6.14686	5.98262	6.3496	4.63704	5.9065	5.30356	5.40629	5.48858	5.83621	6.10219	5.23297	5.33853	5.93177	5.92487	5.77435	5.37592	6.13882	6.87172	5.77843	6.61617	6.19923	6.08947	6.07453	6.38501	6.02816	6.66962	6.52698	5.78801	5.99546	6.70696	6.27889	6.07565	5.66015	6.61116	6.2201	6.14701	6.10443	6.43312	6.05849	5.56104	6.17799	6.57885	6.0759	5.93361	6.37773	6.47042	5.66573	5.88424
ENSG00000047634.15_SCML1	6.61889	5.55624	6.10231	5.87085	1.7056	5.47534	5.97585	5.08145	6.34732	7.09485	3.02618	1.7056	5.67656	7.06006	5.67997	7.17435	5.72341	7.35195	5.26087	6.03693	6.15437	7.95	5.93781	8.46858	6.21376	5.43053	6.27093	6.8085	4.86426	5.87283	5.79687	6.20769	5.53802	8.49064	5.76607	5.48915	5.6173	6.94166	6.34831	5.20237	6.03883	6.64666	7.04453	5.4815	6.20004	7.26512	5.1337	6.4723
ENSG00000047644.19_WWC3	6.90165	6.69471	7.00357	8.19262	7.97231	8.17264	6.96934	8.15886	7.91416	7.99643	8.3504	8.44142	6.89118	7.96119	7.57922	8.59178	8.25223	8.41062	6.67666	7.79895	7.34635	8.33582	8.00833	8.79298	7.16183	8.9275	7.3564	7.35996	8.6241	7.97108	8.10469	7.16387	7.66841	8.63368	7.89908	8.67434	7.3023	7.42026	7.27963	9.00229	7.55824	7.32954	8.34006	8.05288	7.43402	7.5016	8.52644	7.19321
ENSG00000047648.23_ARHGAP6	4.50722	3.79813	3.88319	4.25634	3.66056	5.34363	4.87726	5.01301	4.1956	6.78843	3.93738	5.81944	5.11855	4.08931	4.8137	3.49232	6.08279	4.60235	4.1952	5.89708	4.03741	4.31547	7.07018	3.87037	4.0372	8.58376	5.25753	4.62845	4.43299	5.20022	4.37204	4.57372	5.66243	3.21418	5.46738	3.87643	4.24661	5.00397	5.17324	4.94923	5.36888	4.42622	4.2581	4.57866	4.68425	4.16004	5.28693	4.99443
ENSG00000047849.22_MAP4	9.8278	9.75037	9.47924	9.96916	9.03725	9.71569	9.71976	9.83362	9.66893	9.84921	9.26743	9.34908	10.2868	9.96292	9.59611	9.42926	10.3279	10.1568	9.23446	10.3107	9.7307	9.28516	10.8484	10.0542	9.81131	11.817	10.0046	10.2163	9.31653	10.0913	9.38442	9.75018	9.64775	10.1833	10.1941	10.0904	9.7121	9.37601	9.92777	9.35718	9.77884	10.1219	9.57679	9.26342	9.78273	9.78109	10.0305	9.79793
ENSG00000047932.14_GOPC	8.1064	7.92137	8.17662	6.53626	7.45181	7.154	7.718	7.0038	8.09973	8.44134	7.60302	7.07778	7.61572	7.52041	8.24643	7.78089	7.59724	7.76674	8.22393	8.29506	7.81165	8.37655	7.99712	7.48456	8.08582	8.03864	8.38347	7.77312	7.96359	7.74505	8.05281	7.26454	8.16766	7.75031	8.15731	7.21387	8.49365	7.843	8.04451	7.24391	8.19747	8.12004	7.81238	7.82622	8.0881	7.8761	7.76045	7.73386
ENSG00000047936.11_ROS1	5.31316	5.0727	4.91928	1.7056	1.7056	3.64529	4.00497	4.08038	3.66149	2.62949	5.16656	1.7056	4.12706	2.80773	5.8334	2.72977	3.39373	2.86055	4.76985	3.58376	4.92831	3.75434	3.45304	2.37527	4.50599	1.7056	5.50303	1.7056	3.85124	2.6821	4.25531	3.77996	3.44521	2.34358	3.53686	3.6582	4.58637	3.80074	6.13664	3.1704	5.44116	2.77854	4.04799	4.41109	4.25587	2.54133	5.05116	3.59897
ENSG00000048028.11_USP28	7.20374	5.99569	6.63502	5.64971	5.80994	5.9686	6.25988	5.52572	6.39005	7.60678	2.91381	1.7056	6.57997	6.72453	6.44376	6.83753	6.61151	7.2358	6.57495	7.57952	6.56027	7.2476	7.12905	7.20709	6.72552	7.4472	6.88042	6.62411	6.16689	6.94061	6.66513	7.33521	6.6566	6.93514	7.04341	6.29287	6.48644	7.17515	6.6676	5.76042	6.75654	6.77867	6.54924	6.33358	7.08877	7.74255	6.92884	6.82206
ENSG00000048052.23_HDAC9	6.01246	6.60872	6.8517	4.16076	6.04849	5.67036	4.68475	5.55479	7.4266	4.50728	2.52928	3.77604	4.51849	6.51859	8.35232	7.09417	7.51878	7.12118	7.35555	7.26593	6.45496	5.7449	6.43078	5.27204	7.31442	7.39344	5.97392	3.79676	8.40268	5.47015	7.19693	3.82334	6.90015	4.7515	6.69129	6.45337	7.95822	6.62637	7.27853	6.41887	6.86865	5.28918	6.74254	6.78745	7.25634	7.15153	8.78326	5.97266
ENSG00000048140.18_TSPAN17	7.63341	7.80048	7.65977	7.9384	8.61768	7.71983	8.1284	7.84566	7.2892	7.14618	8.25166	7.48006	7.92743	7.44374	6.99659	7.42411	7.60836	7.94559	7.70687	7.51812	7.48257	7.38073	6.88703	7.75104	7.29518	6.65727	7.13408	7.60238	7.7638	7.78877	7.51084	7.70011	7.72938	7.61322	7.36627	6.99754	7.38054	7.83954	7.44409	8.06556	7.59622	7.90809	7.34735	7.51075	7.28405	7.71823	7.17396	7.60625
ENSG00000048162.21_NOP16	4.9933	5.73616	5.68654	6.81721	6.13609	6.52144	5.86121	6.80764	5.0391	6.27182	5.22157	7.02224	7.08248	5.91218	4.85895	5.77163	5.16531	6.26289	4.93847	5.25644	6.01427	5.6909	4.62656	5.601	5.92144	4.75262	5.34623	6.39421	4.93429	6.08921	4.83063	5.70925	4.82308	5.97577	5.3966	5.72549	4.69734	5.37559	5.67608	6.6535	5.26232	5.60938	5.51951	5.04154	5.26666	5.88294	4.91938	6.78325
ENSG00000048342.18_CC2D2A	5.73978	5.15789	4.83057	4.06428	3.62576	5.88615	5.60427	5.86989	4.48981	5.54067	4.11676	3.44551	5.03159	5.33001	5.09806	5.65121	5.63668	4.76171	4.60951	5.81877	4.62751	4.12636	7.3706	5.23317	4.17826	8.22356	6.09598	4.53226	4.18086	4.77023	4.76993	4.47604	5.53273	5.24045	6.11312	6.26378	3.95223	5.57837	4.89911	4.32451	5.19585	6.24874	4.8351	5.17475	4.9487	5.76104	5.86196	4.76209
ENSG00000048392.12_RRM2B	7.00036	7.1451	7.43232	5.45769	5.54122	5.6487	6.5407	7.15336	6.13676	6.82906	5.41646	5.70456	6.6075	7.15923	6.91903	7.00241	7.11537	8.48095	6.13494	7.40839	6.29481	6.53458	7.52924	7.26014	6.93122	7.38267	7.01228	6.49191	6.94741	7.31419	6.73108	6.76959	6.90234	7.26074	7.31372	6.52087	6.49625	6.11979	6.26886	7.19108	6.93064	6.92493	6.9617	6.18175	7.23424	7.95753	6.74021	7.76867
ENSG00000048405.10_ZNF800	7.6148	8.18402	7.78555	9.06443	9.99958	8.8938	8.07483	9.15806	8.13767	8.26099	9.6892	9.76139	7.89023	8.2521	7.94027	7.90054	7.73307	7.47873	7.92682	7.86467	7.95489	8.50162	7.45907	8.07678	7.84504	7.85264	7.75018	8.21263	7.96981	7.82925	7.82339	7.99995	7.99564	8.19334	7.48946	7.70449	7.98302	7.87277	8.20425	8.97339	7.73245	7.8773	7.8532	7.92354	7.68822	7.77994	7.8636	8.4719
ENSG00000048471.14_SNX29	6.70391	6.14247	6.18444	6.47667	1.7056	7.60834	6.56298	6.94121	6.97464	6.40342	6.45881	6.71012	6.77324	6.84733	6.87172	8.24546	7.52936	7.02662	6.90293	7.13676	6.52116	7.34211	7.86925	7.15387	6.69853	8.37613	7.01748	6.63104	6.66173	7.34229	7.02051	7.26392	7.61476	7.01123	7.21187	8.01619	6.86672	7.37107	7.5658	6.75869	7.35265	7.0963	7.25648	6.78488	7.39238	6.54713	8.27565	6.99666
ENSG00000048540.15_LMO3	3.69429	4.37522	3.86712	1.7056	1.7056	3.63199	3.81697	2.95528	3.75869	2.88631	1.7056	1.7056	4.06384	3.62107	4.29278	3.24261	5.99397	2.766	2.98752	4.33097	3.85151	3.48999	7.85501	3.89578	4.39645	10.2116	4.7617	2.87193	3.15891	3.14105	3.97617	2.70136	4.10137	4.31799	4.97109	3.40093	3.95713	4.44313	4.04793	1.7056	5.55738	4.3928	3.71107	3.11309	4.8015	3.52613	3.3252	3.42899
ENSG00000048544.6_MRPS10	6.76932	6.63412	7.27725	5.25312	5.67763	5.65207	6.43249	5.71166	6.14678	7.53161	4.80788	4.73073	7.14129	6.45021	6.75433	7.13907	6.75427	8.05915	6.62957	7.11251	7.13038	7.02316	6.78891	6.67156	7.04699	7.3636	7.0742	6.73299	6.73737	7.36207	7.24851	6.69081	7.03856	6.98844	7.27868	6.17558	7.59757	7.49592	6.64215	6.22958	6.79022	7.2251	7.20313	6.742	6.86516	7.2207	6.27704	7.15294
ENSG00000048649.14_RSF1	8.21443	7.90558	8.41779	7.43123	5.87619	7.99402	7.25105	7.27947	8.25765	8.15809	6.89814	6.83586	7.68146	8.27489	8.5294	8.4498	8.52725	8.52241	8.30135	8.41731	8.02983	8.42421	8.64036	8.0113	8.20045	9.1987	8.4931	8.12932	8.67276	7.98708	8.38902	8.16304	8.04282	8.3245	8.00136	8.17058	8.30425	8.37804	8.16909	7.38445	8.21615	8.57511	8.06633	8.01334	8.12567	8.36034	7.98503	7.9878
ENSG00000048707.15_VPS13D	10.8433	10.3536	10.2824	9.85781	9.44489	10.7405	10.6166	10.387	10.8699	9.25644	10.2144	9.7038	10.2786	9.96607	10.5146	9.35097	10.2566	10.097	11.1237	10.403	10.459	9.82035	10.7169	9.76531	10.4587	10.6392	10.6929	9.89101	10.4922	10.1208	10.6456	10.3469	10.4854	9.64248	10.3772	10.0043	10.8166	10.158	11.1389	9.88316	10.458	9.9508	10.2652	10.592	10.7977	9.95319	10.4052	10.1044
ENSG00000048740.18_CELF2	8.12386	7.46133	7.81497	8.87594	7.34097	9.01541	8.21551	8.96999	8.1481	8.11952	9.15865	9.83478	8.23252	8.2574	7.84317	8.35955	8.26721	7.06087	7.64784	8.08432	7.63696	8.22095	8.3594	6.98312	8.57978	9.16684	8.3775	8.24841	7.27499	7.77572	7.75506	8.71119	8.52056	6.78737	7.78753	6.1994	7.7161	7.33917	8.28601	8.06828	8.15825	8.73667	8.01536	7.73683	9.04798	7.84774	9.15765	8.40083
ENSG00000048828.17_FAM120A	11.4114	10.9845	11.268	10.6538	9.8129	10.2771	10.7936	10.134	10.7685	10.3496	10.0842	9.92722	11.1119	10.5601	10.9434	10.5559	10.7771	10.7268	10.9257	11.0895	11.1586	10.3639	10.7875	10.2535	10.9865	10.148	11.1251	10.5329	10.8623	10.6892	11.1933	10.6816	10.7732	10.4912	11.1915	10.7702	11.4271	10.9035	11.0761	10.1563	10.8725	10.954	10.6602	10.6272	11.1987	10.7161	10.6428	10.5733
ENSG00000048991.17_R3HDM1	6.83704	6.65488	7.01043	6.76733	5.00486	6.09041	6.47424	6.27311	6.1483	7.90321	3.90936	5.16381	6.66032	7.37169	6.23001	7.77963	6.98015	7.44255	6.04526	7.23181	6.74104	7.7057	7.0104	7.497	7.16141	7.09889	7.28288	7.80411	5.91982	7.61834	6.42546	7.19824	6.54681	8.04264	6.94494	7.21183	6.4112	6.98047	6.9345	5.60088	6.78744	7.70759	7.22022	5.65979	7.12937	7.04772	6.86072	7.37355
ENSG00000049089.15_COL9A2	6.60736	6.78682	5.13699	8.50296	7.26806	8.27917	7.48127	8.98519	6.74278	6.0874	5.89558	7.37092	4.16831	7.35262	5.53491	6.8887	6.6827	5.20902	6.09799	7.45888	4.37149	5.68824	5.34622	7.48316	5.94496	4.12763	4.96562	4.79795	6.67601	6.46937	5.23049	5.92709	5.00878	6.37659	5.20628	4.47025	4.24252	7.38196	5.17936	8.74229	6.54749	9.25901	6.98394	6.8176	6.27121	9.00909	7.85116	6.31144
ENSG00000049130.16_KITLG	8.41407	7.68266	8.42196	6.38907	8.45776	6.90922	8.22739	6.76908	6.87587	7.04195	7.01979	7.58446	8.63482	7.24468	7.92667	6.11612	7.88835	8.03025	8.00523	7.98615	8.04589	7.01053	9.17802	6.60358	7.95123	9.52824	8.17148	7.27466	7.72414	7.12605	7.63223	7.4436	7.43657	7.01202	8.59264	5.33466	7.71431	7.8157	7.4684	5.8759	7.97615	7.11537	7.26169	7.57338	7.9343	7.52199	7.29602	6.22453
ENSG00000049167.16_ERCC8	6.13404	5.76969	6.65021	5.66343	5.48966	5.42017	7.10104	6.50213	5.55167	6.91604	6.23654	5.34918	6.0654	6.07559	6.07436	6.56307	6.08212	6.65726	6.061	6.47536	5.67249	6.34312	5.95654	6.84567	6.47597	6.06778	6.67585	6.87079	5.3505	6.89301	5.0595	5.66439	5.70605	6.16911	6.47014	6.08375	5.87893	6.2369	5.52167	4.919	6.00728	6.20166	5.75758	5.17064	6.21431	6.79565	6.63303	6.39459
ENSG00000049192.15_ADAMTS6	3.8259	3.76302	3.03032	3.99375	1.7056	5.83422	4.33371	5.36409	3.37709	4.01138	1.7056	1.7056	3.20171	6.00908	3.74328	5.24528	4.26102	4.48516	3.05347	4.85729	3.37597	4.90459	4.49162	4.41124	3.43684	5.4605	5.27252	4.06553	3.85696	5.4325	2.4323	5.062	4.46904	4.55451	3.89185	5.9568	3.54833	6.87733	4.6574	4.23614	3.88799	4.269	4.78914	3.18508	3.70192	4.24826	6.46748	4.29369
ENSG00000049239.13_H6PD	9.74616	9.64105	9.63196	10.0842	10.1012	9.50816	10.2221	9.85272	9.40551	8.76157	9.4385	9.32784	9.82955	9.48655	9.03374	9.39171	9.34981	8.81528	9.6967	9.16707	8.92537	9.2397	9.59737	8.67082	9.03721	9.84169	9.22921	9.46551	9.31598	8.85845	9.23104	8.78342	9.17711	8.54407	9.2808	8.61144	9.1273	9.3736	9.18288	10.4556	9.24119	9.58294	8.82435	9.10447	8.88625	9.93083	8.91966	9.75448
ENSG00000049245.13_VAMP3	8.32424	8.50133	9.40014	6.74625	7.55213	7.73757	8.69363	7.97052	8.77523	8.58398	6.80594	7.46073	8.75766	8.96353	9.47361	7.6224	9.24277	9.54198	8.46367	9.0709	8.88891	8.19534	8.91602	8.67082	8.74402	8.89104	9.10185	8.28718	9.27605	8.8823	9.33324	8.00548	9.06393	8.90812	9.05373	7.50039	9.71253	8.79556	8.37783	7.43788	8.81442	8.51353	8.78269	8.72921	8.994	9.28791	8.12872	8.61104
ENSG00000049246.15_PER3	5.18377	6.0228	6.0684	7.33184	6.46253	6.55855	5.85613	6.52967	6.79869	3.83853	8.15962	7.17334	6.97262	7.34231	8.76333	4.68175	8.55434	6.27164	6.41029	7.21002	6.27549	6.17366	8.71747	7.24575	5.60484	9.4565	7.65186	6.20593	7.22824	5.25874	7.71531	4.28312	6.71638	7.35335	7.8608	6.80749	8.42699	7.66236	5.2807	6.83051	7.50394	7.44011	6.36012	6.53247	5.64248	7.10061	7.54095	5.10344
ENSG00000049283.18_EPN3	7.14444	7.46772	7.42337	7.99633	9.22738	7.23486	7.4288	7.72908	6.90984	5.95398	8.05434	8.48656	7.48134	6.47651	6.07452	6.202	6.43687	6.60343	7.4825	6.90792	7.72505	7.34418	7.45123	6.27538	7.36954	3.16489	6.97413	6.22715	6.9517	5.09585	6.90724	6.82098	7.45491	6.49452	6.54436	5.76479	8.06681	6.5334	6.92464	6.85215	7.18386	7.02611	6.80415	6.98571	6.92923	5.70709	7.07087	7.10982
ENSG00000049323.16_LTBP1	7.11848	6.97597	7.67969	7.26217	8.1492	8.70835	7.44274	8.13997	8.06184	7.29155	8.10066	8.12233	7.67605	7.05967	8.37135	4.92145	6.87873	4.69833	7.62899	7.44375	8.03364	7.45181	8.45371	7.69748	7.10543	9.70128	7.64172	7.19788	8.45133	7.79608	7.22657	6.67545	7.57123	7.78811	7.74119	7.81172	7.40434	6.85853	7.23858	8.05002	7.47331	8.02731	6.83208	7.13352	7.05565	5.77715	7.40458	7.26627
ENSG00000049449.10_RCN1	7.21816	7.86444	7.58115	8.80032	7.43666	7.35532	8.76825	8.19048	6.33372	9.90998	6.5536	6.69567	8.32079	8.73324	7.18465	9.86458	7.52759	8.75284	6.33458	7.16705	7.8461	9.28001	7.70648	9.10613	7.88248	8.44267	6.97001	9.48306	6.2989	8.43917	6.69695	8.77186	6.86562	9.30928	7.87932	7.38902	7.05739	7.94825	5.75136	8.14471	7.39905	9.1462	8.76173	7.68632	7.56906	9.46394	5.98447	9.46257
ENSG00000049540.18_ELN	5.50534	5.37418	4.99571	5.59192	6.23171	7.72097	7.07732	5.71343	6.78442	5.66639	9.00419	7.47203	7.83701	4.8295	6.09106	3.62023	6.74514	3.50332	5.55126	6.35108	5.63352	5.65196	7.75747	5.98565	5.05146	8.66014	7.61055	5.62837	4.80366	4.75688	3.45805	5.09169	6.5632	5.26555	6.86004	6.09586	4.6437	4.88555	5.93306	6.08401	5.95761	4.41351	4.41497	5.01616	5.16475	4.69887	7.03257	5.48865
ENSG00000049541.11_RFC2	5.94943	6.45847	6.44148	6.45598	5.55774	5.66931	5.95574	6.48462	4.89087	6.96579	5.63604	5.87297	7.22681	6.8493	5.92616	5.89079	6.50682	6.53382	5.18302	5.30014	6.45538	6.45363	5.32524	6.76582	6.47464	5.86124	6.11546	6.44241	5.37765	6.67164	5.86214	6.75165	6.15618	7.21061	6.49095	6.13309	6.0593	6.1569	5.49307	6.81961	6.223	6.37909	5.9054	5.49622	6.03534	7.01063	6.48358	6.59582
ENSG00000049618.24_ARID1B	9.573	9.20916	9.13091	8.99291	7.70205	9.14874	9.1652	8.88217	9.35309	9.69125	8.28991	8.25775	9.05483	9.14137	9.20442	9.60201	8.89205	9.70588	8.94145	9.06468	9.09206	10.1365	9.49507	9.37294	9.08891	9.81887	9.31557	9.39456	9.29367	9.40667	9.11027	9.46416	9.11488	9.42052	9.10651	9.91421	8.65473	9.45941	9.27722	9.13779	9.35514	9.63867	9.0453	9.0755	9.12745	8.971	10.1291	9.606
ENSG00000049656.14_CLPTM1L	8.27063	8.61904	8.80291	8.80515	8.46363	8.31088	9.25	8.55325	8.59305	8.82117	8.56959	8.11106	9.14645	8.39848	8.66836	8.64698	8.889	8.68316	8.73283	8.18146	9.10838	8.95116	8.24206	8.7243	8.73016	8.29857	8.22093	8.75689	8.69492	9.10269	8.62984	8.90494	8.31263	8.8092	8.28929	8.19899	8.7696	8.75361	8.25697	8.55384	8.69795	8.85365	8.47092	8.90511	8.39433	8.7791	8.0494	8.80943
ENSG00000049759.20_NEDD4L	9.68568	9.63125	9.69516	8.64743	11.6557	9.00725	10.2833	9.80639	11.4851	9.07411	10.5405	9.06691	9.10732	9.44587	10.3298	8.76657	9.53773	7.69075	10.0214	10.0878	10.0044	9.16137	9.63463	7.79521	10.0633	8.62978	9.62207	9.00318	9.53425	8.64841	9.94788	9.44206	9.81646	7.82421	9.44846	8.04204	9.76858	9.14178	10.4391	9.21033	9.54876	9.02855	9.20692	9.76362	9.30511	7.87975	9.75448	7.97154
ENSG00000049769.14_PPP1R3F	4.70646	4.03498	3.42199	5.71544	4.94776	5.56672	4.3319	5.66753	4.3949	3.17711	4.9176	4.94818	4.48217	5.00383	4.04592	4.69953	3.67189	3.43044	4.79001	4.23793	4.56631	4.77843	5.23035	5.01377	4.00262	6.57764	4.78203	3.7824	4.31213	4.84974	4.42348	4.0134	4.57989	4.65588	4.25992	4.6082	3.9396	4.27402	4.74472	6.05849	4.5823	3.78645	4.79598	3.88454	4.27266	4.28648	4.42149	3.8094
ENSG00000049860.14_HEXB	8.47837	8.40974	9.31697	8.68901	9.25671	8.312	8.69015	8.40686	8.97266	9.17555	8.5926	8.5072	8.69581	9.0071	9.07074	8.25482	8.64097	8.76771	8.41121	8.13425	8.81804	8.97454	8.66448	8.62441	8.17518	8.10197	8.03994	8.28644	9.55231	8.43567	8.57599	8.52449	8.45353	9.03044	8.52112	7.27163	9.06184	9.16476	8.04968	8.42447	8.2927	8.98703	8.78766	8.55217	8.05167	9.05581	8.03577	8.95673
ENSG00000049883.15_PTCD2	5.68421	6.36898	5.81401	5.93576	4.18476	5.37695	5.07063	4.93092	5.54187	6.25297	3.03745	3.71083	6.19901	5.92143	5.3788	6.65401	5.56041	6.00206	5.74809	5.84874	4.65748	5.44729	5.58789	6.10715	5.11733	6.70765	5.55217	6.57131	5.65636	6.10404	4.96011	6.02763	5.62367	5.98183	6.16189	7.53782	4.46803	5.89489	5.5257	5.45514	5.45058	5.8355	5.76727	5.27652	5.8135	6.24764	6.23248	5.94808
ENSG00000050130.18_JKAMP	6.8579	6.73642	7.46165	5.57506	6.98708	5.95594	6.97503	5.60878	6.54206	6.18766	6.01586	5.94366	7.10795	6.32951	7.01316	6.29407	6.55423	7.39977	6.16912	5.87873	6.99926	6.51556	6.88415	6.42184	6.92017	7.04307	6.60257	6.5605	7.07545	6.52534	7.08472	7.07318	6.71751	7.21282	6.55872	5.67786	7.39778	7.2469	6.78504	5.90666	6.40543	6.69912	6.24492	6.51222	6.67008	7.69908	6.17013	6.57839
ENSG00000050165.19_DKK3	5.76028	5.06429	5.87725	6.29435	6.03281	6.61466	5.68396	6.55169	5.75757	6.88535	7.39052	6.98822	7.13793	5.68502	5.26319	5.67058	6.356	5.41023	4.92275	6.53976	5.94329	6.34108	7.90278	6.4699	5.78112	9.32214	6.60427	6.14749	5.33	6.43234	5.38763	6.59549	6.46182	6.16098	6.97843	5.37468	5.35088	5.11632	5.09689	5.95285	6.27252	5.82716	5.25142	5.03878	5.90528	6.48731	5.57656	5.93844
ENSG00000050327.15_ARHGEF5	9.99367	9.73731	8.57593	8.77348	9.76071	9.98089	9.07841	9.83007	10.044	9.12813	9.55104	9.46788	9.38725	10.5864	9.5053	8.14706	10.0361	8.76928	10.5435	10.5926	10.0349	10.2549	9.63186	9.72549	9.14284	6.69671	9.1444	8.65093	10.2034	8.98387	10.2505	9.04855	10.5165	9.81231	9.27601	9.15705	10.9187	10.3838	9.47127	9.00716	9.02305	8.42335	9.75001	10.0121	9.46042	8.30218	10.7011	9.51925
ENSG00000050344.9_NFE2L3	7.23879	7.69765	7.24169	9.64252	8.14411	8.18388	7.00801	8.45728	6.9852	9.26421	7.10831	8.12545	7.32997	8.79451	7.7151	8.25663	7.23177	8.89914	7.00828	6.53037	7.18227	8.75799	7.0103	9.92514	7.74966	5.99051	6.50449	8.69796	7.29551	7.62816	7.24712	8.27067	6.99782	10.2531	6.58888	6.93401	7.43735	8.42803	6.79922	8.40886	6.81409	8.4451	7.75319	7.25822	7.78399	8.63484	6.2117	8.9435
ENSG00000050393.11_MCUR1	7.88175	8.01077	8.43879	7.80606	11.0124	7.68601	8.19971	8.05061	8.32377	8.57426	9.14881	8.48181	8.13087	7.69294	8.44652	7.1791	7.20669	7.12974	8.46018	7.808	8.75142	8.37275	7.98885	7.60112	8.08616	6.91036	8.2777	7.98151	8.12355	7.60884	8.1951	7.21075	7.86512	7.73345	8.16759	7.06689	8.70822	8.19662	8.01952	7.95611	7.93401	7.26312	8.10323	7.97931	7.99947	7.61762	7.20335	7.86477
ENSG00000050405.13_LIMA1	10.8438	10.6951	11.3673	7.66864	8.39959	9.16731	10.3169	9.22759	11.2491	9.17021	9.746	8.80264	10.5831	10.3476	11.7029	8.27689	11.086	9.74012	10.9785	10.749	11.1379	8.86083	10.6554	9.2456	11.0004	7.98679	10.8522	9.31598	11.7315	10.4367	11.6161	8.32752	11.022	9.50492	11.3435	7.96511	12.0648	10.9203	10.7599	8.37305	10.7646	10.2555	10.7414	11.0863	10.6992	10.3024	10.1161	9.45339
ENSG00000050426.16_LETMD1	7.38761	7.18627	7.14583	6.75246	4.53084	7.04239	7.28401	7.22148	6.72352	7.47345	7.4883	6.30981	6.95274	7.48321	7.16941	7.3244	7.14747	7.44394	6.91347	7.30639	6.86842	6.55755	7.01779	7.43651	7.02873	7.06609	7.13734	7.09537	6.96723	7.12712	6.97966	6.82948	7.02282	7.536	6.90625	7.35195	6.67302	7.01749	7.0105	6.63953	7.28297	7.06363	7.40273	7.04762	7.15737	7.24528	7.0267	7.61106
ENSG00000050438.17_SLC4A8	4.19996	3.58943	4.12763	4.62493	3.94397	4.83043	3.14029	4.67601	3.93162	5.71845	1.7056	4.6606	3.44427	5.90089	4.03899	3.87089	3.37834	5.43268	3.81706	3.03841	3.94683	4.83735	4.57936	3.38155	3.40328	4.86258	3.6483	5.30705	4.89596	5.64682	3.29698	5.81836	3.46947	2.97043	3.25242	6.20309	3.63916	4.72458	4.51453	6.8339	4.83674	6.71035	4.25606	3.25971	4.00846	4.28668	5.47605	6.00947
ENSG00000050555.19_LAMC3	4.41353	3.76305	3.52298	6.1052	5.2646	4.452	3.46886	6.67892	4.62502	4.99307	4.63896	5.72401	4.69078	4.21852	3.83726	3.31972	4.03915	3.24624	4.83758	4.17145	4.18145	4.37665	2.64423	3.10479	3.19157	3.16892	4.004	4.13833	4.97343	4.86409	4.52129	4.74201	5.89754	2.90893	5.14653	1.7056	5.00236	4.75303	5.39376	4.87574	5.13836	3.85162	4.61625	4.73895	4.24433	5.30885	4.68596	4.12026
ENSG00000050748.18_MAPK9	7.73115	8.1167	8.25741	6.8774	5.54917	6.84004	8.36835	6.43546	6.98692	8.03808	6.15861	5.82162	7.80353	7.61165	8.15297	7.77597	7.80093	7.64963	7.9906	7.85621	7.83974	8.19353	8.22453	7.81559	8.17231	8.40518	7.87201	8.0644	7.95008	7.83734	7.99452	7.55115	7.86624	8.03711	8.08489	7.2621	8.2926	8.39205	7.45238	6.44773	7.73079	7.69059	8.06139	7.70049	7.86971	7.93764	7.55306	7.76782
ENSG00000050820.17_BCAR1	9.49736	9.44653	9.36002	9.65126	11.8108	9.93421	9.73636	10.3659	10.6721	9.00216	11.3242	10.7406	9.41378	8.98253	9.9485	8.51999	9.56754	9.66206	10.2781	9.52456	9.8651	9.82843	9.38687	8.77549	9.50122	8.59974	9.23873	8.94127	9.86296	8.99293	9.97486	9.41193	9.76296	8.68537	9.47303	9.40895	10.2496	9.51052	9.73883	9.34351	9.28468	8.56853	9.28195	10.2487	9.35417	10.0322	9.47469	9.03485
ENSG00000051009.11_FAM160A2	10.0769	9.73388	9.29327	8.72127	10.1854	10.2673	9.49459	10.0015	10.4627	8.71829	10.9167	10.2157	9.54224	9.17708	10.198	9.34808	9.72969	8.63585	10.4505	9.7801	9.67085	8.99734	9.59714	8.85756	9.70524	8.01517	10.0387	9.22136	10.2154	9.07788	10.4713	9.56046	10.3652	8.52876	9.60866	9.61973	10.3659	9.59458	10.7382	9.44799	10.1795	9.07628	9.6513	10.3709	9.70134	8.60053	10.8244	8.97572
ENSG00000051108.15_HERPUD1	8.2909	7.77495	8.56341	5.96296	5.67741	6.84422	8.12425	7.2357	9.06468	8.22906	6.81929	7.12195	8.11183	7.78436	8.83684	6.99139	9.48101	8.58889	7.63223	9.13236	8.40303	7.91427	8.00781	7.98403	8.2925	8.02681	8.10717	7.62905	8.85764	8.44881	8.65746	8.55303	8.34788	7.34485	8.87098	6.78748	8.74645	7.91823	7.88875	7.11901	9.14925	7.56495	8.19088	8.29136	8.72297	8.77455	8.19585	7.43099
ENSG00000051128.19_HOMER3	4.1493	3.95969	3.46584	4.62902	5.74898	6.31654	4.51918	5.59105	4.65983	5.80118	6.16908	6.98757	4.5186	5.08477	4.22173	5.98575	5.70301	5.94871	3.99765	5.30551	3.58892	5.98173	5.3769	5.79154	4.01639	5.9094	3.85632	4.57651	4.44844	5.92445	3.22287	5.54481	4.97334	5.42094	5.08197	6.34493	3.50085	2.98287	4.95837	5.27205	5.67991	3.64706	4.21314	4.14504	4.27499	5.39802	5.4983	3.98922
ENSG00000051180.17_RAD51	4.75638	5.25384	5.65458	5.97219	3.73095	5.44871	5.30676	4.697	3.61571	5.42911	5.00532	5.04916	6.24601	5.19538	4.38805	5.51845	5.33344	6.25353	4.71131	4.31517	5.79927	4.50499	3.9631	4.5279	5.84142	2.68558	5.75628	6.01271	3.73773	5.18441	4.48274	5.80114	4.00779	5.26369	4.96519	4.60395	4.39811	5.75369	4.25644	4.37335	4.79201	5.22106	4.41628	4.80392	5.41553	6.2869	4.5891	5.24408
ENSG00000051341.15_POLQ	7.05033	7.09343	6.53016	7.93322	5.68371	6.93307	7.13952	6.94152	5.813	7.14097	6.40646	6.30057	7.40648	7.16664	6.48921	7.85205	5.82063	7.56189	6.31913	5.2141	7.53341	7.70726	6.22893	7.66377	7.81224	3.83837	7.2633	8.44674	5.32863	7.42025	5.97676	8.0258	5.80441	7.79519	6.49986	7.00277	6.66493	6.29177	7.47416	7.06749	6.07375	7.34673	6.81926	5.85292	7.32075	7.78002	6.34621	7.21465
ENSG00000051382.9_PIK3CB	8.39907	8.38821	8.63549	7.83347	6.22968	7.76651	8.54395	7.3263	8.40063	8.24604	7.40448	7.2048	8.4237	8.02805	8.91	8.39502	8.09048	9.2173	8.60336	8.2404	8.72198	7.8241	8.26621	8.18239	8.43451	7.91379	8.35499	8.27499	8.86492	8.16378	8.93865	8.2951	8.43154	8.43451	8.41092	7.57904	9.15533	8.30629	7.90248	7.11037	8.23733	8.24977	8.2551	8.59488	8.63945	8.67928	6.98097	8.5213
ENSG00000051523.11_CYBA	9.29537	8.96405	9.51799	8.50292	8.59659	9.14157	9.513	8.80029	7.5631	9.08133	7.30006	7.73957	9.27395	8.58419	8.84317	8.60595	9.06754	8.62948	8.57253	7.99662	9.08539	8.44989	8.11511	9.07096	8.05912	6.38064	7.80035	8.30551	8.22067	8.93285	8.18561	7.64535	8.45454	9.27296	8.67904	7.89786	9.20213	9.57751	8.12892	9.12938	8.2444	9.05825	8.47547	8.53515	8.9802	9.30165	8.60742	8.87197
ENSG00000051596.10_THOC3	7.15286	7.40853	7.55129	8.40634	7.18478	6.87663	7.86486	7.03883	6.1999	8.73904	7.47336	6.9864	8.08463	7.38235	6.67414	7.62718	5.96414	7.24954	6.31852	6.4624	7.24098	7.07304	6.47444	7.39105	7.05867	5.9878	7.06979	7.66306	5.7086	6.98483	6.64096	6.95727	6.41933	7.86961	6.83045	6.66793	6.33608	6.91422	6.71948	7.99303	7.15361	7.66615	6.79977	6.21282	6.3969	7.32055	6.85379	7.71463
ENSG00000051620.11_HEBP2	8.19529	8.95631	8.83635	9.34651	11.809	8.88895	9.00796	9.41485	8.3803	8.67495	10.4683	10.1061	8.71618	8.47311	8.24372	8.60851	7.82926	9.25639	9.35627	8.3778	8.71158	8.0686	8.05486	7.74582	8.13632	8.06685	7.52419	8.21001	9.19752	8.03593	8.4174	8.36405	8.22341	7.95906	7.7908	8.11573	8.85367	8.55308	7.92868	9.59966	7.88796	8.02537	7.97986	8.95815	7.86332	8.14843	7.6703	9.16076
ENSG00000051825.15_MPHOSPH9	7.37513	6.65901	6.99782	6.49664	4.26588	6.65375	7.18216	5.36046	6.15722	7.41465	5.54623	6.18974	6.9641	6.92409	6.68238	7.5874	6.13893	7.81428	6.3079	6.48807	6.98073	7.65353	6.82718	7.96508	6.92582	7.05162	7.46951	7.64958	5.96382	8.15688	6.15374	7.69852	6.82616	8.12112	6.89842	7.57823	6.40491	6.33891	7.0801	6.67541	6.66528	7.07876	7.11995	6.18708	7.92065	7.42667	6.7215	7.34997
ENSG00000052126.15_PLEKHA5	8.01328	7.66844	7.70257	6.74229	7.38392	7.10653	7.55777	6.23915	7.77918	8.33514	5.53885	5.83819	7.41528	8.10764	7.50033	9.54042	7.28367	8.10288	7.56696	7.51956	7.39673	8.6165	7.85952	8.59558	7.97097	7.42436	7.58564	7.56797	7.84718	7.35186	7.90641	7.11407	7.54916	8.475	7.93457	8.09699	7.77935	8.58726	7.75222	7.3697	7.57086	8.5256	8.23724	7.73936	7.80356	7.66154	6.87881	7.98007
ENSG00000052344.16_PRSS8	10.7686	10.8576	10.6964	10.8366	13.1754	10.2435	10.5566	10.9382	11.4959	9.99921	12.2929	11.4358	9.8091	10.0392	11.618	7.62625	10.5377	9.41071	11.7787	10.3443	11.0642	10.6811	10.2619	9.71145	10.2063	3.90026	9.94038	9.53493	11.539	9.04103	11.4834	8.5597	10.5452	10.0874	10.4376	9.27481	11.5381	10.4303	10.0714	11.4942	10.3705	9.45572	10.4344	11.4395	10.0026	9.70625	10.2898	10.3698
ENSG00000052723.12_SIKE1	7.41686	7.12553	7.68234	5.92343	5.85378	5.79223	6.75572	5.35999	7.2498	7.58915	4.6386	4.74301	7.32434	7.4362	7.91611	6.45662	7.36563	7.59955	7.29807	7.30641	7.63117	7.62133	7.39391	7.26957	7.63178	7.58193	7.87793	7.51287	7.90484	7.19772	7.91108	6.95	7.13146	7.27652	7.58682	6.64856	7.71207	7.32233	7.43356	5.5691	7.80471	7.50479	7.55381	7.22271	7.61302	7.5472	7.03715	7.19302
ENSG00000052749.14_RRP12	6.57111	8.07407	6.73746	9.28912	6.89413	8.73815	8.37268	9.02178	7.54448	8.70478	7.47532	9.7018	8.52182	8.38647	5.87481	8.43571	7.69496	9.12865	6.45775	6.907	7.25734	8.37055	6.67106	8.41094	7.43778	6.74654	6.96485	8.59753	6.28515	8.38989	6.36072	8.5839	6.43139	8.54256	6.87638	8.60175	6.51854	7.39839	7.45491	8.50042	6.84262	7.6481	8.03074	7.18865	6.80684	7.43889	6.98485	8.57306
ENSG00000052795.13_FNIP2	9.36645	9.00424	9.47319	7.22399	9.49419	8.10787	9.18864	8.32523	10.1807	7.94476	8.89765	7.93227	9.15073	8.65949	10.2615	7.4274	9.27117	9.07286	9.20695	9.01731	9.50545	8.61467	9.06904	7.93803	9.32104	8.03794	9.01573	7.86791	10.091	8.34317	9.67433	8.8113	9.20447	8.21622	9.22611	8.24264	9.58632	8.8843	9.47406	8.61846	9.29124	8.51244	9.01585	9.66333	9.25992	8.58365	8.51243	7.9598
ENSG00000052802.13_MSMO1	9.57295	8.26062	8.28001	6.80353	9.2168	6.83927	8.26024	7.62865	9.43115	7.28274	4.61604	6.48294	7.0159	6.73952	9.3073	6.78803	8.65323	7.30133	7.51374	6.39672	10.2207	8.26672	7.74761	7.11306	8.54417	6.70664	8.39896	8.3813	8.20483	7.28562	7.92719	7.51172	8.31985	8.25819	7.81174	7.47029	9.34375	8.24751	9.24896	7.72173	7.62549	8.43885	7.77171	7.71467	7.96083	7.55685	8.39607	8.64581
ENSG00000052841.15_TTC17	8.66667	8.26765	8.20819	8.02126	5.83686	8.57278	7.98859	7.76784	8.79477	8.77536	6.68597	6.45562	7.80966	8.60382	8.5461	9.15993	8.28146	8.92998	8.48486	7.95083	8.21031	8.88259	8.54712	8.85531	8.31927	8.35401	8.28235	8.44668	8.46138	8.41428	8.4272	9.06267	8.22775	8.92991	8.13242	9.58394	8.40919	8.55343	8.77253	7.6196	8.67225	8.8281	8.7084	8.30677	8.60214	8.69899	8.60245	8.50412
ENSG00000053254.16_FOXN3	8.81785	8.76041	8.79832	8.12823	9.23899	9.56506	8.71719	9.24144	9.09422	8.1432	10.4353	10.3254	8.45524	9.19901	9.69582	7.63737	9.28657	7.92277	9.35881	9.21917	7.92083	8.114	9.3467	8.31876	8.98915	10.2597	9.29964	8.55546	9.61685	8.79279	9.58806	8.42663	9.74974	7.924	9.02176	9.47702	8.33313	8.98432	8.91742	9.5379	9.54621	9.00843	8.72238	9.11948	8.97444	8.17656	10.3641	8.37497
ENSG00000053371.13_AKR7A2	8.35809	8.41429	8.58037	7.23488	7.88474	8.20355	8.39897	7.80403	7.01594	7.39668	8.31197	8.7687	8.2756	7.31011	7.65967	6.45027	7.78013	7.28939	7.88245	8.27632	8.29843	7.24911	7.64696	7.56661	7.7662	7.7118	7.97134	7.24693	7.4299	7.69442	8.1308	6.9133	7.7435	7.56075	8.40847	6.62255	7.88645	7.3476	7.38464	8.23192	8.03129	6.99332	7.3333	7.63415	7.45315	7.17165	7.19601	7.85678
ENSG00000053372.5_MRTO4	6.38856	7.55135	7.02866	8.23543	7.07274	6.93797	7.43276	7.02513	5.76015	7.24435	7.28887	7.60993	7.94778	7.17297	5.90938	7.07271	6.34955	7.65103	6.40503	6.57402	7.03935	7.42757	6.64108	7.44532	7.31787	6.50774	7.01338	7.85389	5.83069	7.21006	6.49537	6.75524	6.39884	7.90539	7.0771	7.11114	6.20233	6.1404	6.58067	7.56578	6.5333	6.98732	7.3101	6.59646	6.56291	7.19529	6.10074	7.70114
ENSG00000053438.11_NNAT	5.71787	5.50884	4.39531	6.29674	6.63843	6.00774	5.83296	5.56976	5.21423	5.44865	4.04615	5.74732	5.23777	4.63428	5.01707	5.38025	3.96666	3.87176	5.23458	4.31108	5.38666	6.81726	6.12982	5.68458	5.29519	7.21297	5.14158	5.20498	4.75219	4.67013	5.06948	4.86839	3.71361	5.13169	4.50499	7.59377	5.01638	4.87058	5.97423	6.1429	5.1676	5.08111	4.8199	4.92571	4.77236	4.60839	4.36758	5.63556
ENSG00000053501.13_USE1	5.46406	5.9112	5.33014	5.84644	5.08215	5.70131	5.10962	6.33463	5.73511	5.29554	6.25109	6.43568	5.77733	6.00715	5.56221	5.54343	6.06118	4.801	6.1051	6.16052	5.59858	4.72958	5.32232	5.56111	5.49657	5.08371	5.55599	5.59118	5.96367	6.01161	6.08708	5.32976	5.66681	5.62952	5.56792	6.2117	6.03974	5.27166	6.07964	6.33276	5.95056	5.46414	5.75826	5.53677	5.63133	5.01932	7.16709	5.82429
ENSG00000053524.13_MCF2L2	4.53293	3.53871	3.90514	4.81768	4.08947	4.67527	3.12715	4.09207	5.22867	3.96949	4.35351	4.69627	3.6856	4.3827	5.46143	2.63132	4.97784	4.00863	3.79851	3.13751	4.2182	3.57688	4.09486	4.07889	2.79799	5.04801	3.78536	3.0827	2.56977	4.33178	4.29025	4.16787	4.55433	3.46495	4.18221	4.47353	4.84175	3.50952	5.6865	3.65429	3.78449	3.48504	3.67493	3.28813	5.25068	3.54917	3.83688	3.5345
ENSG00000053702.15_NRIP2	6.01206	5.42691	4.47546	5.91575	6.68255	6.41231	5.63717	5.00938	4.93593	4.23248	5.45348	4.42044	5.36861	4.97583	4.86686	5.43719	5.38848	4.94416	5.45823	5.45761	4.78467	5.19677	5.68642	5.6075	5.33356	6.1722	6.24821	5.75072	5.16392	5.16286	4.67622	5.10457	5.11665	5.40996	5.43441	6.41851	5.3156	5.11861	5.91963	5.67309	5.59602	5.38051	4.89664	5.67513	5.9481	5.17	5.32541	4.7094
ENSG00000053747.17_LAMA3	9.41171	9.38726	9.00699	7.83273	8.94009	8.16573	8.74914	9.48807	11.847	10.151	9.59851	9.50137	9.12144	10.4376	9.94839	11.1548	10.0149	11.4156	10.3178	10.2007	9.75625	8.49259	9.02937	9.43503	9.29794	5.87709	8.81252	9.14809	10.9494	9.67329	10.1668	8.07975	9.44785	9.41531	9.13527	10.344	10.2299	10.1513	10.8678	8.52103	9.02385	9.268	9.78265	10.3546	9.92266	10.1097	9.79802	9.17473
ENSG00000053770.12_AP5M1	9.23726	8.74771	9.50668	7.91516	8.92772	7.33896	8.8046	7.958	8.25779	7.62095	8.77933	7.91584	8.76241	7.95906	9.17256	7.10259	8.7205	7.50253	8.77938	8.66643	8.9661	7.94738	8.45399	7.45325	8.8633	8.00759	9.0422	8.14146	8.97052	8.11896	9.12386	7.51683	8.82684	7.42612	9.28119	7.20663	9.49158	8.73687	8.4482	7.82552	8.67725	8.52317	8.20909	8.38703	8.82124	8.63546	7.88361	8.5688
ENSG00000053900.11_ANAPC4	6.37228	6.76396	6.68112	6.1031	5.69309	6.87455	6.48133	6.12286	6.32882	5.31315	6.70641	6.39422	6.42857	6.4154	6.37628	6.41027	6.20226	6.40913	6.79769	6.41915	6.62962	6.62067	6.64094	6.61121	6.60825	6.79939	6.72358	6.84119	6.72182	6.37328	6.72973	6.50661	6.37834	6.62843	6.44327	7.07739	6.50441	6.6452	6.77863	6.95086	6.80996	6.85616	6.16725	6.47736	6.64404	7.04859	6.62437	6.17698
ENSG00000053918.18_KCNQ1	8.21586	8.68311	8.34483	10.4859	8.46	9.39359	9.22585	8.9229	7.86671	8.05963	7.96427	8.55124	8.41686	8.24101	7.4619	8.59344	7.73389	7.69492	7.59593	7.28319	7.59924	8.90102	7.60709	9.27656	8.1481	4.6017	7.68101	8.09609	7.18666	8.84307	7.8122	8.67512	7.30571	9.38696	7.59457	7.42215	7.45195	8.41241	7.85755	10.16	7.71402	9.28772	8.49459	7.67291	7.91505	7.61739	7.45216	9.23095
ENSG00000054116.12_TRAPPC3	6.80239	6.91992	7.09974	7.40137	8.29507	6.87521	7.06557	7.55347	7.11589	6.30571	7.3027	8.64315	7.27023	6.94587	7.18696	6.18016	6.88159	7.0636	6.98783	7.06669	7.04482	6.84223	6.82403	6.82796	7.14115	7.62082	7.01771	6.95013	7.25409	7.1614	7.2186	6.71276	6.8592	6.91734	7.23463	6.30059	7.22649	6.87752	6.75657	7.03002	6.76957	6.68746	6.77278	6.95496	6.8971	7.14168	6.86287	7.05715
ENSG00000054118.15_THRAP3	9.03115	8.84918	9.56799	8.93124	7.15444	8.70003	9.05203	8.81405	9.00472	9.11709	8.45351	8.33417	9.42597	9.1049	9.36681	8.766	9.16889	9.48277	8.80175	9.26054	9.27467	9.15995	9.25175	9.44534	9.25568	9.69895	9.27808	9.24802	9.07341	9.53974	9.30295	9.41655	9.11729	9.70354	9.32335	8.60818	9.36095	9.31591	9.42102	8.95656	9.2657	9.33201	9.14911	8.76276	9.13743	9.69642	9.54651	9.15837
ENSG00000054148.18_PHPT1	7.35806	7.28176	7.97805	6.3594	7.01874	7.08876	7.8869	7.18179	7.57329	7.68871	7.42977	6.80998	7.64141	6.89416	7.52485	6.46909	7.88486	7.73869	7.37491	7.75782	7.33303	6.73047	7.34249	7.26169	7.36794	7.43159	7.68465	7.94709	7.91861	7.69362	7.55771	7.98779	7.46318	7.39975	7.85242	7.22161	7.53301	7.07365	7.64861	6.91664	7.64207	7.39977	7.60913	7.465	7.79187	7.30095	8.43664	7.68196
ENSG00000054179.12_ENTPD2	6.8771	7.34662	6.88113	7.50725	7.10959	6.2997	7.29123	7.54512	6.76383	5.08114	6.86325	7.91446	6.71594	6.93964	7.39505	5.37798	7.36213	8.04444	6.65776	6.39628	6.45874	6.8181	7.15723	7.42	6.10072	6.47314	6.58857	7.89879	8.18651	6.75321	7.39684	8.39156	7.12544	7.23034	6.52086	7.64281	7.27513	7.44053	6.86711	7.4172	6.96659	8.09977	6.61403	7.34453	5.95348	5.39435	7.11574	7.08572
ENSG00000054219.11_LY75	9.41897	9.39858	9.25265	8.37877	8.87667	8.55343	9.29195	8.84668	9.35741	9.18302	8.21989	7.18988	8.7047	9.60744	9.79684	8.70566	9.06964	8.73516	8.87209	8.13853	8.94909	9.3415	8.33984	9.73602	9.02514	4.84202	8.71561	8.12686	8.97536	8.76653	8.40372	5.38934	9.3264	9.8046	8.63642	9.1547	9.14372	8.79282	9.06959	9.22982	8.99019	9.21461	9.09098	8.95863	9.48754	9.11166	8.50534	9.66814
ENSG00000054267.22_ARID4B	7.99207	7.65688	7.91992	7.96847	9.93496	8.49312	8.31195	8.03055	8.53452	8.19733	8.70716	8.22172	7.41843	7.99875	8.48055	9.07143	8.10214	8.45013	8.50601	8.05589	7.98771	8.53304	8.34644	8.28725	7.96146	8.34434	8.13802	7.74964	8.21949	8.19047	8.05634	8.40594	8.3217	8.33365	7.85541	8.35602	8.40338	8.29444	8.19121	8.79658	8.06874	8.04665	8.32675	8.16279	8.331	8.0439	8.6197	7.79688
ENSG00000054277.14_OPN3	7.02757	7.46643	7.95988	4.16413	6.93034	5.04311	5.70498	6.66899	8.0735	6.2909	6.81717	5.97121	5.98438	6.4686	9.04536	5.98358	7.89073	4.65801	8.46237	7.79261	6.78817	6.19063	6.48565	5.92455	7.52659	4.67722	7.31063	4.39376	9.55037	5.4357	8.9579	4.39614	7.56766	5.89541	7.82171	4.56429	7.74688	7.36615	6.7898	5.93635	7.59085	5.07002	8.07392	8.56473	6.54823	5.80638	7.42681	6.53944
ENSG00000054282.16_SDCCAG8	5.14227	5.69063	5.46202	4.46167	1.7056	5.74299	5.59096	4.87122	5.81187	5.81805	4.43753	3.41258	5.16186	5.88277	5.58755	7.77336	6.03827	6.47808	5.70434	6.25443	4.08041	6.05417	5.66653	6.41501	5.46402	5.69956	5.7714	6.03429	5.50791	5.94134	5.2307	5.51624	5.92661	6.27998	5.43487	6.8065	5.44877	5.58968	5.9975	5.47794	5.76585	6.2952	5.82464	5.72669	5.84981	6.73075	6.34298	5.51271
ENSG00000054392.13_HHAT	6.18685	6.20912	5.46126	4.44918	7.01479	5.50854	5.75599	5.55714	6.21172	4.70402	6.91954	5.42763	4.70995	5.68697	5.7594	4.76061	5.33473	3.67921	6.01409	6.03714	5.02147	5.07765	5.5994	4.90094	5.4481	5.71482	5.68335	5.17288	6.23105	5.04463	5.77028	5.20857	5.53388	4.49434	5.53454	4.15173	5.41979	5.16916	5.65586	6.47123	5.81821	5.26593	5.22564	6.11697	5.35498	5.60038	6.10619	4.68139
ENSG00000054523.19_KIF1B	9.62275	9.33691	9.47267	9.07952	9.35312	9.45408	9.09474	9.13027	10.0273	9.00762	9.77167	9.40385	9.37195	9.04899	9.58755	8.99964	9.90143	9.7889	10.0322	9.7353	9.40208	9.44172	9.74556	9.16038	9.24347	10.5734	9.53917	9.28541	9.73428	9.44201	10.1149	9.49303	9.79993	9.15122	9.76588	8.67378	10.1361	9.66183	9.194	9.03331	9.53561	9.04112	9.83066	10.3998	9.53237	9.13721	9.34728	9.30845
ENSG00000054598.9_FOXC1	4.1198	3.34682	4.06111	4.91971	5.48745	6.38933	4.3357	3.50972	4.93636	4.66422	3.06819	6.63094	4.9459	4.29944	3.74388	8.38728	5.34261	6.51883	3.55238	4.98752	4.37012	6.34242	5.66422	4.87652	3.81623	5.0167	5.34216	7.35889	4.31614	5.639	3.83109	6.62087	4.62464	5.03157	4.09088	6.70978	4.51198	4.91704	4.27023	7.99658	4.46293	4.32111	4.89509	3.34277	5.00972	7.32123	3.15259	4.49409
ENSG00000054611.14_TBC1D22A	8.30954	8.32265	8.11847	7.69503	8.47321	8.64682	7.94128	8.42597	8.3252	7.90262	8.67786	8.51296	7.82382	8.28417	8.52488	8.04687	8.5566	7.74795	8.83838	8.77966	8.10483	7.30268	7.91314	8.17592	8.09016	7.08876	8.10441	7.90602	8.57704	8.13148	8.65062	8.53946	9.03517	7.78518	8.2403	8.17099	8.83077	8.03245	8.5646	8.17969	8.27591	7.60277	8.27409	8.44836	8.30148	7.84333	9.37328	7.98536
ENSG00000054654.19_SYNE2	11.937	11.1636	11.3469	10.0015	10.8163	11.0111	11.0948	10.8711	10.8635	10.0947	10.4082	9.56025	10.8714	11.216	10.686	11.2075	10.3091	11.8354	11.5772	11.2095	10.8097	11.4779	11.1075	10.6119	11.1664	9.58605	11.8444	11.3313	10.5981	10.2064	11.4596	10.9858	11.3125	10.83	11.4704	11.4389	10.9457	11.3029	11.5887	11.5826	11.3172	11.7121	10.8152	10.8881	11.5088	11.696	10.939	10.8144
ENSG00000054690.14_PLEKHH1	9.82133	9.11019	8.83182	9.41207	9.60553	9.77003	9.40365	9.63449	10.0483	8.42049	9.3841	9.84731	9.19858	9.28989	9.44519	8.29589	9.39796	8.3816	9.96865	9.46128	9.37109	8.81994	9.19952	9.22263	9.4483	6.09746	9.77028	9.51588	9.65337	8.8915	9.81775	9.00032	9.60637	9.20954	9.35289	9.85104	9.873	9.45639	10.2679	8.95024	9.56717	9.03607	8.90937	9.75193	9.79516	8.15249	9.97915	8.88063
ENSG00000054793.14_ATP9A	10.5174	10.9328	10.3084	10.8705	10.2938	8.88859	9.66544	10.3088	10.7295	10.9785	10.2488	10.0063	9.26111	10.6921	10.6807	9.39946	9.99656	9.05726	10.7646	10.181	9.67468	10.8026	10.1365	11.3099	9.9584	10.0574	9.80701	10.8763	11.4241	9.43783	10.8286	8.99962	10.0265	11.1645	9.88239	11.9345	9.83759	10.5122	9.97079	11.6191	9.9709	10.4475	10.2999	10.5233	9.37465	9.28379	10.0678	11.2653
ENSG00000054965.11_FAM168A	7.70297	7.70622	7.3307	7.11423	5.83555	7.54477	7.49387	6.83075	7.15354	7.74624	7.36509	7.29213	7.8108	7.53432	7.07514	7.82039	7.68235	7.64537	7.21709	7.82988	7.11692	7.45461	8.38214	7.81072	7.38484	9.73201	7.72917	7.53827	7.58335	8.35302	7.64577	8.03823	7.34753	7.87893	7.82402	7.34305	7.27855	7.57981	7.17198	7.13777	7.79333	7.94769	7.36601	7.42189	7.48919	7.83659	7.53744	7.88612
ENSG00000054967.13_RELT	4.28764	4.90849	4.42567	7.15575	4.21697	8.68185	5.74671	7.32526	5.65994	6.46765	6.35813	6.17285	5.47715	5.33937	4.45759	6.30422	5.27463	6.49147	4.65246	4.04088	5.1584	5.99501	4.84361	6.3057	4.79318	4.3917	5.47961	6.32652	4.78453	6.95614	4.92159	7.45591	5.64115	6.09253	4.81164	6.1949	4.91505	5.75652	5.51432	5.91988	4.94145	5.10581	5.60622	4.81737	5.32466	6.6501	6.86917	5.83515
ENSG00000054983.17_GALC	6.89351	7.46723	7.00719	4.764	6.56168	5.22803	6.45849	5.60315	6.54835	6.98497	7.31464	6.98834	6.92954	7.64129	6.92105	4.53429	6.94287	4.38546	6.05442	6.61059	6.88668	4.82111	6.96927	4.40448	7.08465	6.85545	7.07506	5.95498	7.89415	7.7448	7.00392	4.82832	6.2192	4.28543	6.39808	6.57374	7.47924	7.90911	5.79638	7.10017	6.18654	6.39348	6.75674	6.25478	6.25578	5.04522	7.00839	4.84846
ENSG00000055044.11_NOP58	6.45328	7.12037	7.11795	8.59577	4.23048	7.25175	7.43971	7.86938	6.85604	8.38417	5.73241	6.54146	7.50552	7.79557	5.90949	8.129	7.15223	8.02222	6.36978	6.5536	6.99865	8.2486	6.28985	7.87039	7.31118	6.65454	7.08458	8.14444	5.78575	7.53258	6.17824	7.71219	6.28871	8.11274	7.0548	7.92901	6.41167	7.30688	7.02214	7.34589	6.8035	7.98169	7.40974	6.17993	6.9914	7.75921	6.57506	8.06682
ENSG00000055070.17_SZRD1	9.03948	8.93401	9.48575	9.16795	9.59631	8.88139	9.31907	8.86231	8.81914	8.65438	9.44864	9.11876	9.63689	8.68985	9.02694	8.15154	9.23363	9.11896	9.2923	9.00087	9.3364	8.84882	9.05322	8.85099	9.07839	9.44733	8.90905	9.14341	9.19309	9.24446	9.17569	8.64621	8.87153	8.91593	9.07178	8.63182	9.3451	8.63464	8.49673	9.08092	8.94987	8.1944	8.91306	8.907	8.86057	9.38793	8.56788	9.38958
ENSG00000055118.17_KCNH2	4.05345	5.29259	3.93806	5.20566	1.7056	5.22583	4.20729	5.44704	4.15417	4.87939	5.19831	4.26207	3.85692	7.021	4.03287	6.12466	5.23247	6.16169	3.19758	4.37258	4.01295	5.81298	7.54515	5.98592	4.04246	9.79668	4.40866	5.9106	3.96387	6.29988	4.19004	6.92537	3.93072	6.45739	3.82502	5.64874	3.84007	4.41066	4.40991	5.97684	4.38146	3.56719	5.94204	4.51996	4.81496	2.48507	4.13605	5.53873
ENSG00000055130.17_CUL1	7.48861	7.60985	8.07067	6.68931	3.7723	7.03905	7.76549	7.02297	7.85114	8.50302	6.51261	6.02529	7.79748	8.12623	7.6174	7.23667	7.63997	8.13764	7.35015	7.846	7.65194	8.58954	7.89953	8.37596	7.90637	8.63354	7.6235	7.87162	7.63606	8.07896	7.7441	7.32207	7.73059	8.42074	7.86511	7.84577	7.99688	7.67154	7.80008	6.87689	7.58028	7.75336	8.09771	7.45001	7.79849	7.52417	7.14026	7.74465
ENSG00000055147.19_FAM114A2	6.04665	5.59617	6.24519	5.47687	4.7154	5.26007	5.32507	4.67267	5.74823	6.52542	4.63229	5.17928	5.64403	5.18403	5.97808	5.92706	6.52724	6.37587	5.70987	5.16071	5.97693	5.05206	5.89447	5.48374	5.60747	6.60469	6.21143	5.42715	6.01763	6.53233	5.92015	5.59585	6.37554	5.19773	6.0682	5.14339	6.22517	6.08829	5.17388	5.49584	5.95283	5.55941	5.9741	5.70084	5.899	5.68441	6.58596	5.71825
ENSG00000055163.20_CYFIP2	7.82333	7.05484	7.71278	5.88282	5.48538	8.75685	7.58918	6.65376	6.25276	7.75758	5.56553	7.35578	6.99884	7.40713	7.12533	6.49134	7.29006	8.1055	7.62096	7.39256	6.8322	7.99015	7.12972	8.11566	7.41771	7.27359	7.51491	7.3452	7.70956	7.89507	7.65296	7.58488	7.60696	8.07308	7.55366	5.8879	7.65915	6.81946	7.29996	8.32982	7.70433	8.29538	7.24562	7.50387	8.37403	6.96532	8.93898	8.29464
ENSG00000055208.19_TAB2	9.01503	8.49217	9.18568	6.54996	4.86677	7.40814	7.91513	6.8047	9.00653	8.88719	6.542	5.43779	8.17548	8.37002	9.56415	8.15769	8.89616	8.9768	8.70874	9.59059	8.6333	8.75438	9.43905	8.20773	8.92326	9.89631	8.97773	8.12299	9.61263	8.79161	9.50514	8.14589	9.14709	8.11307	9.22142	7.97294	9.43096	9.00567	8.62643	6.3796	9.1752	8.74656	8.93133	8.83632	8.9779	8.69818	8.82594	8.50107
ENSG00000055211.14_GINM1	6.96832	7.49582	8.20183	6.21068	7.84986	5.8607	6.80495	6.44212	8.04109	7.11671	7.16822	6.28138	7.03077	6.80266	8.59667	6.24541	7.98304	7.78318	7.58968	7.4158	7.61037	6.63818	7.8985	6.59438	7.37206	8.37265	7.33817	6.34575	8.55237	6.62433	8.20564	6.82912	7.61357	6.49305	7.89411	5.51809	8.37591	7.22376	7.02231	6.38937	7.5073	6.73018	7.40998	7.53334	6.69446	6.80121	6.95201	7.06261
ENSG00000055332.19_EIF2AK2	9.07272	8.90929	9.41464	9.00647	10.8993	8.57219	8.93277	8.91588	9.6499	9.65637	10.1477	9.73185	9.46303	9.5044	9.77938	9.18247	9.10323	9.8229	9.66778	9.61108	10.0082	9.10022	9.64798	10.063	10.1224	10.242	9.50118	9.52444	8.61512	8.72902	9.47247	8.50204	10.0258	10.2612	9.70008	9.20307	11.3216	10.1177	9.20035	9.45454	9.67506	9.13707	9.25697	9.47372	9.39907	10.644	9.31742	9.06981
ENSG00000055483.19_USP36	7.88953	8.31551	7.37126	9.6249	7.95435	9.28835	8.26904	9.22925	8.75269	9.32276	8.03546	8.42077	8.49383	9.14915	7.72354	9.39409	8.08061	8.64463	8.01982	7.5821	7.5477	9.37458	7.76937	8.26928	8.04088	8.13823	8.26544	8.71921	7.23607	8.60107	7.60939	9.47341	7.83699	8.42155	8.04755	10.9116	7.153	8.07691	8.92556	8.75837	8.34226	8.53514	8.94905	7.89241	8.02579	7.77935	8.88381	8.87139
ENSG00000055609.21_KMT2C	10.8962	10.3143	10.2225	10.2908	10.1982	10.7963	10.2182	10.4437	11.1821	10.7155	10.5367	11.8651	10.2741	10.7885	10.7363	10.5108	10.4468	10.457	10.8681	10.4967	10.5787	11.3504	10.8017	10.6903	10.5447	10.6771	10.6218	10.4644	10.8419	10.5682	10.7007	10.9182	10.6567	10.6077	10.4162	10.8572	10.8377	10.6346	11.1951	10.6445	10.5041	10.7717	10.836	10.654	10.822	10.335	10.7738	10.6186
ENSG00000055917.16_PUM2	9.71149	9.47256	9.97385	8.78488	7.11245	8.84095	9.48574	8.53324	9.49389	9.90062	8.42301	7.45238	9.28353	9.59276	9.91061	9.84271	9.43148	9.85683	9.41483	9.7072	9.42526	9.52671	9.98272	9.76408	9.80385	10.4261	9.82195	9.66347	9.91904	9.50731	9.94872	9.28695	9.39027	9.9078	9.81379	9.68431	9.6944	9.43419	9.50693	8.91067	9.73288	9.85118	9.70397	9.44494	9.80516	9.94596	9.39108	9.55872
ENSG00000055950.16_MRPL43	7.298	7.25155	7.67572	6.93505	6.8009	6.78496	7.3714	6.8019	6.64677	7.49591	7.25764	6.72654	7.48979	7.0463	7.05117	7.2369	7.01959	7.90476	7.05744	7.14824	7.23111	7.52737	7.26908	7.44752	7.09915	7.61524	6.95991	7.2202	7.13428	6.80265	7.00666	6.89825	6.82864	8.02395	7.37553	6.01762	7.04655	7.15025	7.20729	7.14506	7.23586	7.43489	7.10171	6.94267	7.40666	7.55242	6.75724	7.44038
ENSG00000055955.17_ITIH4	4.02053	4.04265	2.91829	3.49332	1.7056	5.2627	4.48448	3.4636	4.36071	3.37121	3.64179	1.7056	3.61875	4.75731	3.7873	3.97104	4.9001	4.72075	4.93384	5.2482	3.01794	3.09524	3.79523	3.72696	3.71452	5.19616	4.03516	2.7583	3.8578	4.90516	3.70894	4.92371	5.37059	1.7056	4.31519	1.7056	3.37438	4.11975	5.52364	3.36924	4.7735	4.25128	3.75419	4.86269	4.80821	4.32334	5.99113	3.92358
ENSG00000056050.7_HPF1	4.86807	4.76133	5.32362	3.97159	1.7056	4.5335	4.94927	3.83995	4.50082	4.8738	4.95673	3.99346	5.18393	4.5136	4.23159	4.47499	5.24159	5.37193	4.66579	5.506	4.75939	4.38791	5.47744	4.77426	5.13423	6.07006	5.05745	5.14107	4.3836	5.62338	4.28902	4.64231	5.06239	5.12724	5.13059	3.02483	4.61631	4.58427	4.75851	3.57148	4.8718	5.02009	4.01793	4.16887	5.19343	5.54358	5.38275	4.7433
ENSG00000056097.16_ZFR	8.16947	8.04925	8.74154	7.1816	5.68215	7.75002	7.98391	7.21662	8.45408	9.09813	6.69442	6.90546	8.36458	8.20181	8.30629	8.55326	8.39451	8.44067	7.77845	8.66854	8.39671	9.13735	8.75368	8.56443	8.55808	9.35111	8.39798	8.27744	8.1417	8.56039	8.50833	8.45503	8.01766	8.83533	8.55208	7.75639	8.37662	8.58947	8.37135	7.44953	8.38223	8.75546	8.12506	7.87353	8.39786	8.34586	8.00088	8.40885
ENSG00000056277.16_ZNF280C	4.70031	5.07093	4.6589	4.46755	3.59391	4.2176	3.35196	1.7056	4.43816	6.31354	1.7056	4.01594	4.49053	5.39683	4.77775	5.833	4.53767	5.64257	3.90584	5.16136	4.18247	6.26668	5.26512	6.84803	5.06264	5.81397	5.1652	5.63538	4.55335	5.58997	4.46641	5.73473	4.38381	7.13645	4.55272	5.99003	4.60648	5.14185	4.39243	4.42257	4.39406	5.70838	5.49973	4.51601	5.00914	5.60219	4.46544	5.70605
ENSG00000056558.11_TRAF1	6.15059	5.78492	4.95599	7.37889	4.35968	8.17011	6.226	7.56896	5.86826	5.74019	3.99293	6.19802	4.85676	6.34185	5.43013	5.94982	5.93136	6.42088	5.80973	6.0641	4.89068	6.61939	5.82369	6.83034	5.5985	6.15621	6.07121	6.49505	5.99165	7.20028	5.81104	6.82765	7.11938	6.44166	5.89239	7.69607	5.71949	6.50166	6.7575	6.08409	6.21789	5.9718	6.40167	6.17537	6.95805	6.21493	6.9034	5.7656
ENSG00000056586.16_RC3H2	8.36472	8.80337	8.7003	8.96085	8.98372	8.67237	8.70534	8.36562	8.44993	8.03251	8.37723	6.99568	8.53124	8.37713	8.83138	8.9658	8.23506	9.08102	8.38443	8.73773	8.65618	8.33955	8.86805	8.78012	8.52636	9.16511	8.49804	8.84739	8.66272	8.76152	8.40025	8.4645	8.64803	8.67369	8.59857	9.0435	8.63084	8.90677	8.53885	8.27546	8.24678	8.79769	8.57028	8.53144	8.52055	9.44521	8.48177	8.77772
ENSG00000056736.10_IL17RB	6.38863	6.05459	6.65266	7.12834	5.67727	6.45979	6.94104	6.06205	7.7187	5.94473	5.45142	5.3921	6.84381	6.67489	6.36353	6.74833	5.13861	7.12253	6.92367	5.50261	6.57498	7.28245	6.1937	6.14398	7.19644	4.56821	7.93957	7.55469	6.07488	7.29588	7.97732	7.20531	6.86539	6.30581	5.5055	7.58833	6.57104	6.16641	6.43511	6.59411	6.84181	6.16907	5.77293	5.89321	6.25877	8.07948	6.77601	6.71539
ENSG00000056972.20_TRAF3IP2	8.82285	7.99694	8.54545	5.44673	8.3144	6.95333	7.19955	6.40132	8.27257	8.98295	7.04738	6.00306	8.39543	7.5776	8.70844	7.71683	8.80572	8.41246	8.61448	8.93156	8.2527	7.39813	8.02086	7.04894	8.36488	6.20086	8.05122	7.17954	8.93593	7.44072	9.02469	6.95828	8.1792	7.64388	8.76558	6.52345	9.04797	8.69077	8.13065	6.84842	8.48222	7.46593	8.45458	8.39707	7.95383	7.76057	7.99154	6.97005
ENSG00000056998.20_GYG2	5.08565	3.98484	5.75093	7.1203	6.12284	4.89975	6.15107	6.10057	4.29734	6.40785	5.16815	6.6825	5.32634	6.09705	4.49382	4.33234	5.19691	5.12658	4.76994	4.95136	4.8936	5.6709	5.82034	6.08578	5.4735	4.70656	4.82938	4.96141	3.9878	3.97085	4.47424	4.25057	4.01118	5.93597	5.05907	3.16389	4.56203	4.35595	5.08877	6.42617	4.61623	5.91558	5.47494	3.97923	5.53337	4.91695	5.20957	5.27289
ENSG00000057019.16_DCBLD2	6.25831	6.36539	6.66298	7.04539	8.1326	6.58249	6.67754	7.31395	5.66893	7.08826	7.56766	7.06993	6.19949	6.70969	5.88142	9.91559	5.93734	11.8084	5.99865	6.18787	6.3681	7.16784	7.87861	5.72699	6.66819	9.75611	5.81991	6.58087	5.43771	6.19015	5.63952	6.43158	5.34402	5.41303	6.05087	8.54098	4.95666	4.82755	5.82309	6.82715	6.31657	6.89707	6.61112	5.81639	5.91294	4.5634	5.84108	7.49613
ENSG00000057252.13_SOAT1	7.43963	6.7343	8.11068	5.92362	7.905	6.18352	7.81689	6.54883	7.28477	6.91702	6.46674	4.75112	7.09505	6.98477	7.64841	5.40797	7.09076	5.89342	6.72403	6.68927	7.58889	6.93987	7.67537	5.84218	7.51667	7.98588	6.88757	7.60788	7.49427	7.06163	6.69358	7.19064	6.68575	5.73642	6.73392	6.39886	6.28211	7.3589	6.61274	8.12835	7.06172	6.71994	6.01451	6.49819	7.40525	6.60904	7.22969	6.69817
ENSG00000057294.16_PKP2	10.7129	10.4007	10.7794	8.55033	9.22707	9.20711	10.985	9.47983	10.7069	9.67714	9.58588	9.11576	11.0917	9.85509	9.75857	8.56976	10.1515	9.10499	10.78	10.3932	10.6989	9.40771	9.93667	9.42854	10.62	4.67979	10.1097	9.79554	10.6577	9.32101	10.6931	9.44881	10.3373	9.77119	10.7536	8.95816	11.028	10.4074	10.7272	8.61697	10.2807	10.075	10.1261	10.6406	10.4821	9.51252	10.0459	9.24109
ENSG00000057608.17_GDI2	9.78851	10.1363	10.6037	8.8076	7.19402	8.85649	9.98557	9.23372	9.89573	10.6862	8.90955	9.075	10.3332	9.863	10.6405	9.7653	10.3942	10.2386	9.6725	10.3558	10.4703	9.59439	9.84779	10.3115	10.1972	9.5989	10.1176	9.69622	10.2511	10.2529	10.3872	9.86486	9.98339	10.5772	10.4364	8.58636	10.9362	10.1052	9.65321	8.66447	10.1607	9.96842	10.0973	10.0186	10.1048	10.2472	9.7389	10.1085
ENSG00000057657.17_PRDM1	7.54002	6.52863	7.36708	6.62973	5.49722	6.99464	6.6741	7.26039	9.93053	7.80839	5.4734	6.55399	5.73705	7.20854	7.84101	6.03696	8.1469	8.88104	6.5228	7.78628	8.05307	7.07757	6.72541	7.28099	8.41652	5.06685	6.51199	5.5632	8.31283	8.32833	6.93642	6.72788	7.79925	6.67683	7.91303	8.81414	8.17275	7.65012	8.23721	6.65399	7.9168	6.2133	7.55165	7.57735	8.81496	7.89957	7.13486	7.08953
ENSG00000057663.16_ATG5	7.8729	7.43846	8.1405	6.94118	7.00919	7.07439	7.36793	7.08821	7.48444	7.96956	7.37858	5.66928	7.69573	7.11617	8.04126	7.2372	7.58852	7.68078	7.87329	7.66699	7.71787	7.61109	7.27654	6.91428	7.45036	7.31936	7.5889	7.2315	8.11196	7.68762	7.96095	7.37229	8.24773	7.3469	7.79009	7.17406	8.05023	7.36482	7.63416	7.38633	7.66672	6.98079	7.57666	7.79467	7.48539	7.52478	7.24284	7.90446
ENSG00000057704.13_TMCC3	9.3971	9.65694	10.3356	6.44698	8.77903	7.81445	8.59771	7.91256	10.7007	7.35542	9.0641	7.83501	7.92628	7.88314	11.115	6.83685	9.76313	8.2221	10.3602	9.83286	10.2207	6.27495	9.29842	7.49554	10.0488	7.38882	9.69027	6.88554	10.7808	7.70506	10.6321	6.97275	10.6793	7.26109	9.6998	7.31354	10.8131	9.54767	9.08748	6.48215	10.2947	7.59859	9.39786	10.0939	9.39678	7.68302	9.1227	6.68998
ENSG00000057757.10_PITHD1	6.75574	7.29494	7.49703	6.96451	5.3701	6.51686	7.58734	6.46248	6.97852	7.18465	6.0495	6.88386	7.89119	7.10267	6.86137	6.41338	6.97411	7.66324	7.05046	7.02486	7.65849	7.21556	7.27796	7.35452	7.33986	7.81967	7.21022	6.94089	6.9461	7.0309	6.98561	7.26065	6.68056	7.64495	7.30796	6.56894	6.79161	6.78941	6.76264	6.90249	6.89153	6.81909	6.97888	6.82172	6.87124	7.45391	6.72441	7.72994
ENSG00000057935.14_MTA3	7.56786	7.24931	7.91347	5.99145	6.03137	6.29668	7.07875	6.16759	7.63799	7.60743	5.41644	5.93954	7.01979	7.56059	7.26215	7.51977	7.28639	7.24606	7.32839	8.17617	7.41203	6.94652	7.44679	7.81202	7.39442	8.0461	7.4785	6.76817	7.30694	7.40863	7.74881	7.38617	7.44892	7.84557	7.67859	7.17646	7.97116	8.12446	7.54838	5.67492	7.57896	7.82091	7.05304	7.38528	7.75679	7.39844	7.13668	7.10642
ENSG00000058056.10_USP13	5.27112	4.31689	5.90826	6.23747	5.176	6.35031	6.35254	6.19324	5.29246	6.0551	4.62913	5.6473	5.8526	5.4894	6.04491	6.88855	5.67258	6.56518	5.04508	5.2427	5.99401	6.09131	6.6133	6.46225	5.98408	7.35995	6.11363	6.98638	4.93034	7.27145	5.83623	7.07103	5.64844	6.73707	5.4943	6.07902	4.63582	5.83591	6.2414	4.74822	5.7253	4.98963	5.08613	4.6538	5.0145	6.56636	6.41189	4.96197
ENSG00000058063.16_ATP11B	9.11112	9.1066	9.51785	8.58035	11.0099	8.62924	9.07323	8.61444	9.60357	8.1465	8.26572	9.91982	8.759	8.63668	9.47683	8.05227	8.52871	8.72797	8.9866	8.77344	9.3627	8.76578	9.10924	8.69954	8.97771	8.71695	8.87578	8.15755	9.24686	8.65023	9.28412	8.01404	8.6508	9.08212	8.85943	7.27857	9.64809	8.68092	9.32209	7.75799	8.78948	8.97794	8.80608	8.96338	9.28119	8.98937	8.17765	9.01067
ENSG00000058085.15_LAMC2	8.54635	8.79962	8.45482	9.00693	9.24183	9.29054	8.62325	9.56463	9.84052	10.4276	8.64365	8.85527	8.18951	9.60204	9.15534	10.0506	8.89376	10.4758	9.7282	9.04428	9.67814	8.77235	8.23127	9.78466	8.61664	3.79195	8.0133	9.21647	9.24981	9.35449	9.25144	9.25422	8.5086	9.77807	8.49883	8.67888	9.86135	9.91647	8.92668	9.24938	8.02116	9.5931	9.1436	10.0201	8.64554	9.35761	8.81911	9.38848
ENSG00000058091.17_CDK14	4.81373	4.67263	4.6036	4.81072	1.7056	6.58161	4.59762	5.93158	4.87835	4.79442	4.80105	4.4169	4.88223	5.36679	5.22767	4.52958	6.26072	4.1385	5.34407	6.3301	4.64826	5.58566	6.60535	5.8805	4.58841	7.55472	5.91166	3.25446	5.12501	6.14086	5.23722	6.31886	5.64104	5.08264	5.97871	6.38657	4.88461	6.25211	5.76015	4.6819	6.52182	4.83707	5.3921	4.38083	5.62592	4.90436	7.28641	4.82767
ENSG00000058262.10_SEC61A1	9.83533	9.65668	9.9375	10.0886	8.91204	9.54536	10.0058	9.16043	9.50086	9.67205	8.77733	8.2472	10.3449	9.48442	9.44244	9.87737	9.74496	10.506	9.55896	9.08494	10.4285	10.1007	9.39459	9.76334	9.50303	9.05443	9.25505	9.89467	9.4813	10.4901	9.69678	10.7472	9.26192	10.0815	9.69934	9.1625	10.0115	9.39214	9.48432	9.48483	9.3339	9.95856	10.0151	9.59933	9.65375	10.2684	8.85386	9.89335
ENSG00000058272.19_PPP1R12A	8.33975	8.2016	8.46185	7.9022	8.78467	8.83499	7.9321	8.57021	8.83393	8.48107	8.74416	9.64721	7.91399	8.63531	8.85131	8.48458	8.69023	9.24876	8.32505	8.76704	8.26985	8.21059	9.56463	8.73341	8.31045	11.0689	8.56165	8.05139	8.43576	8.77225	8.49387	8.37918	8.3987	8.86662	8.49326	8.82468	8.69837	8.21719	8.60306	8.04129	8.67255	8.41395	8.66401	8.5511	8.53879	8.54227	9.16098	7.87979
ENSG00000058453.17_CROCC	6.81614	7.5505	5.15829	9.14071	8.70913	9.56204	7.01413	10.3128	7.55752	6.75191	8.99828	10.1261	6.65266	8.00327	6.71695	7.53689	7.59966	7.4149	6.69093	7.47877	6.04856	6.91236	7.0321	7.35439	6.28843	7.61793	6.86576	7.96264	6.35922	7.5464	6.74159	9.01607	7.72017	6.73082	6.76343	8.91696	6.33892	6.66042	7.36959	8.53027	7.53514	6.99511	7.35048	7.28624	7.10007	6.81828	8.07029	7.78767
ENSG00000058600.16_POLR3E	7.30741	7.78331	7.10662	8.72288	7.0301	7.90568	7.38924	7.99438	7.47247	8.17271	7.16596	8.60361	7.72402	7.94783	6.95139	8.32058	7.48871	7.96354	7.02998	7.38929	7.20708	8.28512	7.08705	7.47904	7.39236	7.22561	7.61811	7.98805	7.18878	7.38033	7.13867	8.37263	7.464	7.49184	7.25836	8.86526	7.07097	7.78959	7.83409	8.31472	7.38756	7.81007	7.97112	7.57675	7.2257	7.55411	7.85781	7.94596
ENSG00000058668.15_ATP2B4	8.29771	8.43722	7.82149	6.99528	7.83613	9.44231	7.96462	7.95575	8.09058	7.77058	8.42563	7.59167	8.1178	7.62765	8.26893	8.17278	8.49717	8.9789	7.85816	8.10857	7.54044	8.36357	11.5597	9.03878	7.76706	13.6605	8.4267	8.4233	7.80806	8.70284	7.67069	7.97511	8.55595	9.06047	8.54057	8.08942	7.04779	8.52582	7.94769	8.27888	8.49988	8.1318	7.86069	8.01415	8.37937	9.37914	8.1611	8.10118
ENSG00000058673.17_ZC3H11A	9.97553	9.60737	9.78185	9.38758	8.59674	10.7364	9.70428	9.44631	10.3384	9.7193	8.92709	7.96806	9.63259	9.73654	10.0661	10.778	9.85568	9.88025	10.1656	9.89497	9.66646	10.3989	9.93835	10.3164	9.89054	9.98267	9.82863	10.2245	9.87381	10.0688	9.96497	10.0649	9.81612	10.5866	9.75259	10.3765	9.81953	10.3823	10.3301	9.29478	9.93735	10.2406	10.016	9.94593	10.0118	10.396	9.86405	9.83215
ENSG00000058729.11_RIOK2	5.26529	6.025	5.93064	5.036	4.85238	4.58167	6.30331	4.69095	5.49343	6.61708	4.82011	4.87724	6.16665	5.88246	5.53576	6.10628	5.84223	6.24618	4.97563	5.89468	5.59962	5.86553	5.8561	5.97406	5.96601	6.25046	6.00636	6.16872	5.62995	5.66117	6.0621	6.11687	5.51606	5.93564	6.12566	4.87778	5.85541	5.92327	5.53942	4.26596	6.2408	6.15246	5.56416	5.32076	5.79804	5.86584	5.71895	5.93424
ENSG00000058799.15_YIPF1	6.34856	6.72771	7.12816	5.45139	4.31125	5.8138	6.38214	5.60435	6.47596	6.29386	6.07033	6.17697	6.43776	6.22986	6.72678	6.03817	6.21515	6.26181	6.65938	5.95893	6.76769	5.57133	6.06636	5.56994	6.03814	6.0893	5.81083	5.84615	6.76385	6.03219	6.64484	6.59798	6.4042	5.83729	6.50057	4.85137	7.04303	6.14534	6.00967	5.81515	5.90114	5.94186	5.8314	6.68694	6.53498	6.83341	6.16538	6.27607
ENSG00000058804.12_NDC1	7.53467	7.21874	8.08884	6.47268	3.59386	6.59333	7.95688	5.36113	5.30378	7.7865	3.92837	4.42588	8.40244	7.4788	6.44837	7.29134	6.66478	8.04964	6.29959	6.2271	8.12413	8.1828	7.06453	8.07215	7.71313	6.30081	7.38991	8.10001	5.76034	7.92909	6.08937	7.53709	5.55981	8.86196	7.14442	6.84509	6.75086	7.44315	6.7878	6.24321	6.4991	8.1614	7.46481	5.96399	7.11836	8.2699	6.8256	8.06303
ENSG00000058866.15_DGKG	3.66333	3.50301	2.85323	4.05081	1.7056	5.15636	4.9749	3.41603	3.65601	1.7056	4.08744	5.07193	4.49413	3.60751	4.25029	3.23231	5.90433	4.52064	3.56451	5.24025	3.46248	4.41132	5.5558	4.23857	4.05087	7.37415	5.44414	3.30647	2.40005	3.9326	4.0887	3.25761	4.86729	3.8378	5.09016	1.7056	3.13683	3.62945	4.49069	3.64487	4.9437	3.60046	4.01346	4.29494	3.7634	3.08847	5.789	3.26593
ENSG00000059122.17_FLYWCH1	7.77224	8.05519	6.74305	8.57344	8.11508	7.74478	7.76308	9.12351	6.57582	6.57393	9.08877	9.68312	7.03149	7.79857	7.20099	7.54005	7.81155	7.64059	8.03889	8.36167	5.84663	7.40686	7.66615	7.43668	6.5215	8.1085	7.49623	7.51511	7.06492	7.34989	6.79283	7.60872	8.52586	6.95848	6.65608	7.52283	7.24776	7.81411	7.99468	8.36137	6.94959	6.9576	7.62817	7.47048	7.50462	6.91251	7.91011	7.87356
ENSG00000059145.19_UNKL	7.42962	7.57771	5.49335	8.09169	7.42798	8.36187	6.36363	7.59412	7.23502	5.91654	8.02179	8.3101	5.93927	7.42741	7.13174	7.95165	7.30711	7.82252	7.3712	7.04348	6.05034	7.69942	6.87913	7.37609	6.87112	7.67018	7.05754	6.98771	7.19663	7.19184	6.86658	7.32545	7.95968	6.73971	6.46411	8.95866	6.2014	8.20956	7.20877	8.82909	7.40348	7.18197	7.11554	7.22115	7.70241	7.61972	8.41166	7.19428
ENSG00000059377.18_TBXAS1	5.26362	4.62403	5.0849	7.54273	3.64061	7.17039	6.61231	5.785	5.52646	7.16347	3.98142	6.73676	6.16302	6.95734	5.15317	6.29236	6.80401	5.80471	5.84223	5.37566	6.06255	8.68989	5.6758	7.71286	5.8776	5.49796	5.29356	5.72265	4.70089	7.34335	5.18316	6.92032	6.15255	7.7513	5.2423	4.60077	5.32433	7.70036	5.74896	7.72096	5.33045	7.63193	6.56792	5.89743	6.35535	6.16109	6.17023	7.93919
ENSG00000059378.13_PARP12	8.70823	8.43748	8.869	8.43037	10.2224	8.80739	7.92248	9.43517	9.84466	8.29155	9.88944	9.00803	7.96369	8.51914	9.39835	7.92121	8.40507	8.94724	9.76376	9.0525	9.63417	7.49178	8.74629	8.77358	9.12068	6.70632	8.36798	7.12789	9.32345	8.77474	9.27965	7.63022	9.73513	8.843	8.97405	7.78454	10.3965	9.35728	8.77812	8.55509	8.97203	7.40347	9.05843	9.69476	8.96777	8.5833	9.32756	8.04988
ENSG00000059573.9_ALDH18A1	9.89999	9.92263	10.1116	9.24229	10.2362	9.14567	9.43307	8.96877	10.5934	10.0631	10.4461	9.67897	9.62488	9.30805	10.9744	9.27664	9.81721	9.18577	10.378	9.40461	10.1419	10.048	9.52137	9.92788	9.82528	7.85186	9.72408	10.1581	11.5903	9.34486	11.0367	9.52924	9.5465	10.2733	10.1622	9.31225	10.5385	9.60939	9.53522	9.91346	9.98628	9.08741	9.78442	10.6824	9.29219	9.18014	9.28826	10.213
ENSG00000059588.10_TARBP1	8.29052	8.53102	7.57529	10.4785	9.95269	9.63992	8.78334	10.6028	7.40745	8.88352	9.94319	10.4563	8.31085	9.51004	7.55368	9.78842	8.30712	7.91282	8.50128	8.37333	7.86474	9.18657	7.95613	9.804	8.45282	7.39584	8.23856	9.51546	7.46803	8.23807	8.05999	8.27417	8.49977	9.70156	7.97775	10.1197	7.3443	9.45087	8.23025	9.68943	8.43722	9.17632	8.65149	7.90231	8.35156	8.54227	8.49051	9.93497
ENSG00000059691.12_GATB	6.22854	5.94737	6.5773	5.3787	4.16639	4.65924	5.97832	5.57178	5.80199	5.6756	5.73343	4.91432	6.24373	6.2634	5.89012	4.97349	5.43843	6.30851	5.75143	5.65707	6.06233	5.61267	5.9428	5.89019	5.98132	6.39585	6.23452	6.30964	5.67948	6.0216	6.2057	5.37565	6.35438	5.98443	5.9424	6.11978	6.08634	5.58089	5.65178	4.82661	6.57395	5.82758	5.69505	5.46666	5.86547	6.13662	6.61645	6.23651
ENSG00000059728.11_MXD1	10.1715	9.83539	10.9233	8.38522	11.6087	10.008	9.24144	9.63935	12.6714	9.74181	11.1121	9.56536	8.97024	9.66162	12.178	9.60006	10.0602	10.4971	10.9572	10.0317	10.8991	8.37314	10.9375	8.65909	11.047	6.49547	10.0154	9.16124	11.6858	9.88088	11.1355	8.80786	10.971	8.51666	10.2558	9.48811	12.3772	10.7779	10.5262	8.10761	10.2739	7.50908	10.4561	11.0009	11.1953	10.1474	9.64807	8.7315
ENSG00000059758.8_CDK17	7.57449	7.10306	7.01788	7.55579	8.42219	8.46828	7.32884	8.87804	7.33956	6.98804	9.19911	8.67859	6.98529	7.49274	7.33998	7.53759	7.61913	7.91743	7.68846	7.96016	7.14524	6.76739	7.59424	7.39784	7.18424	8.55941	7.37701	6.84654	7.00215	7.48159	7.11327	7.79368	8.00554	7.47675	7.02358	7.61359	7.31067	7.21086	7.89055	7.15455	7.59767	7.1631	7.41917	7.67227	7.29284	7.22838	8.05885	6.62877
ENSG00000059769.20_DNAJC25	5.8104	5.59942	5.23451	5.53012	8.14085	5.35228	4.97754	6.00075	5.26648	4.66507	6.50444	4.41745	5.99684	4.37501	5.02861	4.28716	5.43306	5.56565	5.86423	5.16334	5.98517	4.73975	4.9347	4.66333	4.88985	5.07014	5.00963	5.07477	5.69061	5.26067	6.27582	5.57516	4.89173	4.83499	5.41224	5.02526	5.90224	5.47148	5.42562	5.38977	5.33385	4.91837	5.36516	5.84805	5.08469	4.89152	4.57742	4.82395
ENSG00000059804.16_SLC2A3	4.56489	3.57164	4.76836	4.46602	1.7056	10.9773	5.29945	6.3537	5.30362	8.84013	3.06812	4.42432	4.80992	4.13041	5.33422	7.03621	6.73781	5.82875	4.00471	5.66304	4.71662	5.97826	5.9921	5.27606	4.50416	7.53012	5.71929	5.3084	4.84763	7.69251	3.91861	9.08628	5.80403	4.8302	5.56647	7.60115	4.51212	4.78934	5.93821	4.80456	4.70782	5.03852	5.43311	4.6308	5.18285	6.27391	6.40655	4.54007
ENSG00000059915.17_PSD	4.79513	5.36897	3.92512	3.46982	5.87285	5.09488	5.05952	4.40006	4.49607	1.7056	4.68289	4.78506	3.57388	3.01949	4.55511	3.51426	4.58242	4.22999	4.39645	4.09684	4.4143	3.19577	8.46518	3.04887	4.05104	10.577	4.21076	4.14532	4.39024	3.97391	4.62072	7.30811	4.85409	2.77771	4.50829	5.14849	3.26348	3.97265	5.67993	4.4169	5.34665	3.92013	4.05104	4.6846	4.32858	3.29129	4.50914	3.18353
ENSG00000060069.18_CTDP1	7.94188	8.12349	8.07741	8.7087	10.7935	8.97432	8.43405	8.98453	8.40149	7.55613	10.0962	9.51935	8.09804	8.18527	8.02224	7.19855	7.85402	7.28464	8.7135	8.37446	7.96325	7.51709	7.69971	7.45957	8.02989	6.99923	7.81698	7.95533	8.4895	7.79028	8.45788	8.05339	8.53493	7.4384	7.82074	7.67944	8.18853	7.46802	8.0326	8.07284	7.70376	7.25411	7.65186	8.53814	7.79454	7.54962	8.72451	7.49812
ENSG00000060138.13_YBX3	8.46831	9.06804	8.49831	9.90721	8.48738	9.91862	9.256	10.2084	8.98085	9.74059	9.29395	10.1806	9.22847	9.12989	8.63597	8.03386	9.04619	9.67945	8.51557	9.461	8.31858	9.30735	9.20364	9.20644	8.86669	9.90556	8.95942	9.13624	8.5577	9.47106	8.12552	9.60381	8.8584	9.16199	8.56753	9.61225	8.34276	8.9275	8.80732	8.9587	8.85679	9.13306	9.36523	8.77413	8.74487	9.22571	9.50677	9.22021
ENSG00000060140.9_STYK1	7.31793	7.07315	7.2079	4.16478	7.38337	5.70071	7.23887	6.66981	7.8656	5.44345	5.34599	4.99257	6.47734	6.05336	7.80112	3.89172	6.12297	5.33757	7.096	6.59298	7.61194	6.37351	6.68976	5.14599	7.47813	2.91624	6.81078	5.11104	7.44085	5.05896	7.43579	5.78646	7.06585	5.13811	6.63195	3.29848	7.86928	6.53316	7.44996	5.81136	7.0294	5.9798	6.36443	7.11817	7.21907	6.00761	6.65551	5.15287
ENSG00000060237.19_WNK1	9.65331	9.591	8.88694	10.9692	10.2385	11.2297	9.47606	10.9643	10.3962	10.0001	11.1796	11.6436	9.61888	10.1808	9.98297	10.6229	10.4814	10.1877	10.3056	10.2446	9.10037	10.0081	9.96067	10.3789	9.59979	10.5793	10.1692	10.0495	9.51285	10.5581	9.71204	10.8981	10.9218	10.1264	9.4155	10.7571	9.39644	9.82506	10.1956	10.5796	10.2185	9.79959	10.1728	10.1936	9.97826	9.37233	10.7754	9.9372
ENSG00000060339.14_CCAR1	8.03795	7.86473	7.90444	7.88964	5.8144	7.90508	7.71607	6.79033	7.77057	8.24384	6.92345	6.98337	7.86913	8.19741	7.40401	8.42057	7.87864	8.19507	7.56113	7.67497	8.07191	8.53476	7.56208	8.54444	8.01299	7.4746	7.89095	8.14982	7.55717	8.11926	7.62084	7.99902	7.70327	8.6427	7.72123	8.14262	7.90699	8.1094	8.15822	7.94319	7.86772	8.25563	8.15799	7.52548	7.95368	8.27424	7.79968	7.99775
ENSG00000060491.17_OGFR	7.98634	8.68621	7.74325	10.628	10.0124	10.0404	8.21449	10.3142	8.52797	9.24979	10.0757	10.1396	7.93545	9.29014	9.00359	9.61746	8.59488	9.41179	8.85679	8.95083	8.36955	9.18336	8.24638	9.55439	8.21709	8.34768	7.92298	9.23304	8.56863	9.09652	8.51671	9.56396	9.49221	9.17563	8.19196	10.047	8.73616	8.74675	8.0447	10.2175	8.41203	7.8547	8.81395	9.16453	8.76703	8.76628	9.27244	9.24228
ENSG00000060558.4_GNA15	3.44753	4.72406	4.10362	4.45981	4.23136	6.04663	4.90235	6.66647	4.93562	6.08788	4.63497	5.71008	3.91936	4.76487	3.74491	6.92028	6.00864	4.39748	3.68014	5.04964	3.46966	5.82231	4.6299	4.66333	4.35014	4.0744	3.4783	4.06333	3.85871	7.35426	3.73809	7.56144	4.46834	4.40258	3.96516	5.51865	3.74037	4.00139	4.88367	5.34492	4.91756	5.69435	5.46987	4.62843	4.93733	5.08355	3.87754	3.68357
ENSG00000060566.14_CREB3L3	4.19599	2.73663	5.27395	1.7056	1.7056	2.89228	3.08926	1.7056	6.40121	3.49716	5.27429	4.84078	2.94201	2.68488	7.75027	1.7056	3.8673	4.55405	3.47003	3.03929	3.75011	1.7056	3.45332	4.94148	4.35253	1.7056	5.24482	3.57918	5.44691	6.533	5.46117	1.7056	5.74555	4.49535	3.66737	3.80161	3.22414	3.6054	3.22502	2.77939	5.19271	1.7056	3.32648	4.37866	3.34028	1.7056	4.02774	3.51838
ENSG00000060642.11_PIGV	6.67055	5.98068	7.05972	5.49812	3.27046	4.65786	6.88982	4.80088	5.80435	4.95806	5.69038	4.47901	6.03071	6.08253	6.56911	5.58422	6.17354	5.73603	5.91892	5.70107	6.42449	6.41318	6.1117	5.99239	5.95144	5.76826	6.22991	6.01988	6.97015	5.41533	6.99768	5.63385	5.92006	6.57013	5.95849	4.86995	6.79777	5.88448	6.06511	5.37395	5.75492	6.17729	6.05201	6.53027	5.5217	6.58074	6.17289	6.30193
ENSG00000060656.20_PTPRU	3.73829	5.22228	4.53162	5.1246	1.7056	9.13878	5.50368	5.86434	4.73278	7.65513	4.43646	5.21351	4.86193	3.61129	4.72263	6.20632	4.76572	7.13476	3.24248	5.24246	5.0963	5.08815	6.09274	6.41968	4.28801	6.51977	4.3055	5.07913	4.1718	6.05786	3.52294	5.47445	4.68801	5.86739	5.47289	8.95487	3.32357	6.90877	4.49625	5.96644	4.91142	5.6252	4.54568	3.37088	3.87832	6.80395	5.11522	3.49477
ENSG00000060688.13_SNRNP40	6.37145	6.77752	6.97512	6.67294	4.81981	6.51605	7.16973	6.48595	6.3195	7.04526	5.92268	6.7766	7.68468	6.76278	6.23234	6.75349	6.57533	7.04725	6.15763	6.62225	6.74114	6.73899	6.64494	6.77875	7.06038	7.02107	7.0129	7.47185	6.31563	6.99551	5.94339	7.18163	6.32931	7.08417	6.65271	6.09912	6.68082	6.78102	6.54486	6.57599	6.49058	6.2323	6.85905	6.30349	6.57103	7.18921	6.70774	7.43862
ENSG00000060709.15_RIMBP2	4.97345	3.21862	4.67662	2.77072	5.54667	5.04382	5.48425	4.17909	5.74351	2.61651	5.41122	6.61984	4.67878	2.86203	5.44406	5.19259	4.34699	3.7162	5.07306	3.66935	5.07118	4.04357	5.58541	4.08076	5.87721	5.65153	5.416	3.13982	4.47893	7.41144	4.72067	8.68748	4.74899	3.81141	4.87114	5.76093	3.9076	4.47065	6.16982	3.63279	5.49265	5.31112	5.17468	4.92762	5.18153	2.29212	4.68707	3.10414
ENSG00000060749.16_QSER1	8.43071	8.26136	8.27073	6.8676	4.98234	7.37149	7.41782	6.36152	7.12209	8.87743	5.57002	4.39151	7.95579	8.17576	7.74749	8.47495	7.78559	9.06493	7.22841	8.22339	8.03023	8.30158	8.61173	8.26821	8.38629	8.54349	8.35403	8.40509	7.27498	8.3133	7.44447	8.36258	7.32555	8.723	8.22621	8.43802	7.38603	7.53374	8.00071	4.95711	8.23729	7.75309	7.88706	7.15795	8.12751	9.06873	7.34067	8.07778
ENSG00000060762.19_MPC1	7.78697	7.0989	8.28701	4.44614	3.5929	5.19238	6.89778	5.23265	7.22956	6.38136	5.72682	4.36543	7.12912	6.4409	8.12746	5.50246	7.77741	6.67062	6.90756	7.49614	7.79082	6.37734	6.95851	4.76763	7.66441	6.39819	7.83134	5.5308	7.5636	6.8935	7.60225	6.42092	7.70021	5.29411	8.08703	5.33705	8.62168	7.27656	7.81517	4.84041	7.40388	6.43542	6.82878	7.16142	7.42853	6.3527	6.68676	6.33507
ENSG00000060971.19_ACAA1	8.58479	8.58548	9.29265	8.35884	9.99166	8.12542	8.45977	8.51547	8.90051	7.86773	10.0583	9.31212	8.06656	7.74988	9.67786	8.1041	8.42555	7.48117	9.36792	8.4902	9.21183	6.98014	8.4634	7.10697	8.70872	6.87545	9.07242	7.61523	9.62129	7.91321	9.48051	7.86204	9.06588	7.00031	8.6479	6.91321	9.68723	7.66676	8.64184	8.26655	8.97333	7.41163	8.20004	9.26776	8.31656	6.43531	8.47594	7.45522
ENSG00000060982.15_BCAT1	5.53389	4.28252	5.92482	3.0459	1.7056	6.4366	5.64514	5.34833	5.4095	6.30446	5.6039	5.55815	7.36158	6.01321	6.20224	4.68903	7.54395	6.46156	5.42569	6.98837	5.79144	4.92872	8.06742	6.38372	5.14425	6.01746	6.61282	5.80192	4.69781	7.20444	4.2514	7.87522	6.74388	5.50937	6.94729	6.75374	4.29722	5.1675	5.87391	4.20816	6.19862	4.80586	5.36636	5.46904	6.62099	5.80049	7.52287	4.2754
ENSG00000061273.18_HDAC7	7.16782	7.37571	6.51678	8.60341	7.08691	9.55711	7.82333	8.87517	7.44386	8.55467	7.44947	8.76176	7.6988	8.16646	6.80953	8.47789	8.1234	8.46095	7.17436	7.94368	6.99895	8.16967	8.41182	9.27409	7.2407	9.30639	7.75337	8.21839	6.95869	8.41185	6.9161	8.72292	8.16921	8.79822	7.65725	8.77902	6.6444	7.15333	7.6962	7.82027	7.5959	8.47084	8.19722	7.52376	7.7352	9.13776	8.43409	8.06807
ENSG00000061337.15_LZTS1	3.52483	3.35339	2.86172	4.32605	1.7056	4.85449	3.24156	4.61517	3.11345	4.34702	1.7056	4.824	3.58125	4.29094	3.6213	4.58267	4.20334	3.86548	4.27641	4.17088	3.10066	4.44086	5.89394	4.16135	4.03191	5.01059	3.35908	3.99041	2.96878	6.03497	2.85411	5.38499	3.32354	3.41895	3.92663	4.22585	3.32768	3.41103	3.96056	3.10483	3.84559	4.33131	4.08278	3.91303	4.03036	4.85875	2.69765	4.37839
ENSG00000061656.11_SPAG4	4.36326	4.20256	2.65699	4.31157	4.22829	3.57021	2.90407	4.3448	3.21455	4.42321	1.7056	4.72311	2.98513	5.59499	4.01021	4.69714	5.19117	4.07751	2.50077	4.28229	3.70996	4.54998	3.01585	4.77416	3.04858	3.46399	3.71934	4.44883	3.7653	4.495	2.43319	3.3491	3.56184	4.12714	4.2693	4.65072	2.67602	3.58624	3.62638	3.40113	4.39744	4.63711	3.69101	4.09205	4.53891	4.03025	3.44267	5.59741
ENSG00000061676.15_NCKAP1	9.59808	9.44509	10.2177	8.25239	5.79845	8.22728	9.41521	8.33226	9.38806	10.0331	8.0293	8.31813	10.044	10.0687	9.90911	9.67033	9.35949	10.0891	9.03369	10.0265	9.99659	10.2553	10.2376	9.8839	9.89871	11.2656	9.82654	9.40584	9.93523	9.61301	9.79932	9.24716	9.5487	10.149	10.0035	9.12437	10.2374	9.55382	9.29691	8.39305	9.54288	10.0476	9.71135	9.45839	9.49565	10.1686	8.65353	9.74937
ENSG00000061794.13_MRPS35	7.97237	8.11869	8.81624	6.48351	3.64495	6.9468	8.15573	6.91625	6.94719	8.79619	6.68733	7.78296	8.66356	8.08517	7.68662	8.49002	7.84159	8.80391	7.16354	7.97963	8.40344	8.38281	7.47205	8.76405	8.4438	7.60327	8.23306	8.24286	7.59275	8.4196	7.97511	8.26843	7.69453	9.38199	8.66176	7.2297	8.22048	8.84487	7.38183	7.24854	7.93029	8.35785	8.43184	7.6303	7.71407	7.85332	7.8187	8.41612
ENSG00000061918.14_GUCY1B1	4.3675	3.48084	3.92535	3.91993	1.7056	4.44174	4.1889	3.5423	4.32606	4.4697	1.7056	3.35225	5.38906	5.73829	3.84166	3.72304	4.98578	3.99157	3.00133	4.82864	3.62605	4.40236	7.00065	4.23057	4.44851	8.37524	5.06693	3.69091	3.59113	5.38537	3.06428	5.21089	5.18492	4.20043	5.20986	4.28296	3.97042	3.59079	4.10305	3.643	4.82039	3.99582	4.10742	3.67608	4.28198	4.79781	3.5887	3.77126
ENSG00000061936.10_SFSWAP	7.79574	7.99036	7.08227	8.0922	7.15451	8.56003	7.61328	8.80197	8.32262	7.87638	7.48114	8.79934	7.41027	8.42092	7.82709	8.37883	8.10751	8.25468	7.88002	8.00987	7.30996	8.30923	7.6169	8.25472	7.6924	7.70772	7.94073	7.85496	7.86288	8.27759	7.79508	8.30635	8.13555	8.33546	7.60374	9.00743	7.57698	7.54591	8.52715	8.25707	7.87569	7.93436	8.35145	7.89605	8.26794	7.60296	8.89219	8.10663
ENSG00000061938.21_TNK2	7.56352	8.98637	7.33661	10.7422	8.87832	10.1582	7.48503	10.1175	8.20107	7.95676	9.58161	10.214	7.83832	8.85105	8.26722	10.2443	7.74826	8.82194	7.77388	7.43871	7.73057	8.14711	7.65045	9.22105	7.30341	8.41724	7.52215	8.9506	8.08995	8.77371	8.0453	9.14043	8.87624	8.89169	8.24269	10.3743	8.68436	8.26167	8.10948	8.83908	8.08129	7.70273	7.86813	8.41786	8.00104	8.52624	8.73984	8.79745
ENSG00000061987.16_MON2	9.55143	8.90328	9.03308	8.77741	11.3713	9.69331	9.20469	9.77054	9.7431	8.79133	9.57187	10.1303	9.01436	8.6807	9.5233	8.86222	9.09895	8.93254	9.68721	8.93616	9.37215	8.56073	9.27122	8.92409	9.05985	9.00521	9.44483	8.71951	9.48185	8.96854	9.62113	9.81233	9.3607	8.89096	9.20411	9.21373	9.69336	9.06892	9.92007	9.01733	9.47662	9.37038	9.19237	9.53932	9.78284	8.72901	9.6608	8.44442
ENSG00000062038.15_CDH3	2.65022	6.22141	3.13533	7.26515	1.7056	8.35566	4.44061	8.08524	3.17845	8.98451	1.7056	6.89163	3.57035	7.5286	2.41601	7.44519	2.93166	8.97399	2.48125	3.74039	5.22152	8.12886	3.52491	8.94952	2.3756	3.80482	1.7056	8.28708	2.92541	7.28401	1.7056	7.18717	2.6537	9.24538	2.42214	7.51443	2.85051	6.58611	4.19799	6.20607	2.47421	7.33262	6.21666	5.55508	3.0576	7.19327	3.26606	8.39436
ENSG00000062194.16_GPBP1	8.3947	8.24566	8.65292	8.04823	8.68338	8.29824	8.21446	7.34765	9.87761	8.83214	8.33431	7.32372	8.00653	8.33231	8.73492	8.53117	8.68389	8.96828	8.60342	8.7523	8.45085	8.63359	8.40171	8.19911	8.46797	8.67966	8.42755	8.28304	8.51693	8.44151	8.64832	8.11886	8.40425	8.42412	8.57182	8.23686	8.95801	8.89727	8.59644	7.79058	8.51121	8.44691	8.5359	8.4072	8.73498	8.91384	8.43302	8.31675
ENSG00000062282.15_DGAT2	3.57325	4.83971	4.64909	6.36984	4.21729	6.65118	4.72213	5.16032	2.48034	6.56848	3.08189	4.40331	4.47525	6.20848	3.63129	6.05205	4.16737	6.3774	2.82811	3.46919	4.93426	6.47053	3.9776	7.35464	4.7967	4.18151	4.4091	4.49065	2.97172	4.72225	3.51517	5.38857	3.96404	7.76656	3.68301	6.22983	3.53981	6.26065	3.81294	6.4588	3.8767	6.35447	5.49892	3.84531	3.23437	5.44366	5.77655	6.69985
ENSG00000062370.17_ZNF112	4.87858	4.94165	5.06542	4.20658	3.57707	2.681	4.47842	3.07086	4.76921	5.08316	1.7056	1.7056	4.13037	5.20044	4.66227	5.16473	4.4302	3.92536	5.05238	4.9074	4.30562	4.90938	5.49383	4.81732	4.70825	5.40853	5.06549	4.63867	4.82519	4.75866	5.14537	5.64084	4.48156	4.67433	4.67681	5.78326	4.27984	5.13947	5.34211	4.30842	5.34387	5.50839	4.70809	4.3688	4.77334	5.79985	3.86096	4.15965
ENSG00000062485.19_CS	10.1831	9.65305	10.5046	8.87463	7.51704	8.60423	9.79697	8.60485	9.60219	9.99208	9.43785	9.0789	10.5781	9.63105	10.0249	9.70798	9.80991	9.69693	9.7253	9.76917	10.1852	9.41362	9.66547	9.8589	10.2644	9.50655	10.3688	9.54328	9.75174	9.71614	10.2199	9.3389	9.93941	10.2136	10.3782	8.77368	10.2888	9.4694	9.88914	8.84398	9.96098	9.84452	9.76807	9.4647	9.9811	9.5969	9.44483	9.97446
ENSG00000062524.16_LTK	6.36711	6.70505	6.77088	7.78782	8.23027	5.08582	6.31073	6.25425	6.95771	3.34231	7.85404	6.92364	5.86363	5.32125	7.5969	6.50869	6.73838	7.05819	7.41298	5.58503	6.16444	3.25627	6.42544	6.42555	6.58939	4.9491	7.22523	6.51081	8.00851	7.11054	6.76047	5.65759	7.13497	6.25254	5.66275	2.57871	6.65683	5.80622	7.0076	5.3272	6.5396	5.2433	5.84548	6.44139	5.32177	6.45321	6.72706	4.4064
ENSG00000062582.14_MRPS24	7.43938	7.46957	7.97061	7.8163	7.11374	6.6024	7.84813	7.22455	6.23056	8.05255	8.16143	8.55534	8.11077	7.68324	7.03305	6.95847	7.16511	7.47142	6.66202	7.08226	7.83657	6.98786	6.96985	7.52994	7.0241	7.40359	7.08669	7.35293	6.76609	7.02855	7.02561	6.91363	6.76077	7.85433	7.36142	6.0041	7.52908	6.74647	6.31674	8.39446	6.88774	6.96356	7.29297	6.83706	6.94248	7.33739	6.73902	7.83665
ENSG00000062598.18_ELMO2	6.65328	7.23169	6.54918	6.43135	4.23612	7.10906	6.9928	7.60961	6.57297	7.86819	6.97414	6.70611	6.2643	7.29479	6.79792	6.91854	6.78944	6.69509	6.77621	7.20903	6.70105	7.44406	7.07306	7.73592	6.71627	8.02187	6.64935	7.5827	7.09836	7.42405	6.87393	7.38362	6.96214	7.71829	6.90972	8.14669	6.90763	7.10244	7.32782	7.45441	7.07387	7.23498	7.37361	7.20274	7.10988	6.6611	7.47931	7.93328
ENSG00000062650.20_WAPL	8.35565	8.29286	8.82865	8.08905	7.68664	8.31531	8.70844	7.86619	8.66017	9.03571	7.79983	8.32925	8.68179	8.55793	8.56461	9.00906	8.77128	9.00788	8.626	8.8512	8.60026	9.18794	8.49685	9.24489	8.8545	8.79729	8.57229	8.82128	8.58879	8.57521	8.78178	8.32954	8.34908	9.40153	8.67648	7.94037	8.76693	8.92274	8.68259	8.10641	8.46167	8.29158	8.64357	8.47668	8.62469	8.72032	8.27522	8.54039
ENSG00000062716.13_VMP1	10.2525	9.8303	10.8108	9.19585	6.26848	8.84478	10.3368	8.26656	11.1576	11.346	7.2634	6.70312	9.24881	9.19041	10.3462	11.483	9.51383	10.8052	9.64457	8.76588	10.2222	10.7928	10.1241	9.64344	10.778	9.25793	9.70341	9.27923	10.0382	10.0083	10.5581	9.78712	9.31765	9.51976	9.66853	10.8183	10.7115	9.67457	10.4784	8.05928	9.81592	10.1791	10.134	10.1693	10.49	10.352	8.378	9.64465
ENSG00000062725.10_APPBP2	7.76968	7.68839	8.14042	7.423	8.66397	7.3513	7.89457	7.13181	7.88456	8.06029	7.53299	7.38056	7.78173	7.81996	8.16737	7.79978	7.85962	7.63374	7.87617	7.97881	7.92696	7.91346	8.37773	7.47766	8.02433	9.04523	7.78394	7.62085	7.75027	7.62052	7.90552	7.32464	7.88046	7.46436	7.97301	7.48863	8.20003	7.50321	7.80503	7.42041	8.11123	7.57615	7.60715	7.90854	7.722	7.936	7.72564	7.85623
ENSG00000062822.15_POLD1	7.49995	7.71746	7.3284	9.55545	8.04368	8.47816	7.81164	9.20502	7.43191	8.05732	8.09256	9.41004	8.21172	8.16817	7.55312	8.0642	7.53025	8.12084	7.57016	6.85436	7.50046	7.89206	7.2907	8.2996	7.81377	6.75655	7.69859	9.03324	7.11893	8.09514	7.59714	8.59738	7.94398	8.26671	7.08229	8.96134	6.83078	8.24999	7.63256	8.68997	7.66333	7.97775	7.78889	7.51318	7.70145	8.50587	8.42888	8.09576
ENSG00000063046.18_EIF4B	10.523	10.8384	11.0998	10.8005	8.7401	10.5518	11.0293	10.4327	10.0096	11.498	10.8979	11.3759	11.0807	10.8886	10.5237	11.2744	11.3319	11.2307	10.1851	11.299	10.5697	10.4266	11.133	10.8648	10.753	11.8014	10.8302	10.8727	10.4031	10.7353	10.4408	10.4191	10.4811	11.0408	11.0628	10.7199	10.0262	10.5741	10.2108	10.2507	10.976	10.9266	11.1865	10.6055	10.4386	10.8212	11.0905	11.426
ENSG00000063169.11_BICRA	7.89905	7.45671	6.52798	8.10239	8.32868	8.39183	7.25613	8.2948	8.25145	7.28973	8.4584	8.27867	6.6932	7.87184	7.84752	7.61332	8.23149	7.36295	8.28342	8.45218	7.03259	7.28359	7.49471	7.39711	7.08644	7.15891	7.48812	7.70313	8.20166	7.61067	8.40744	7.80223	8.48856	7.21363	7.69094	8.43486	7.77338	7.82757	7.76651	7.70615	7.69697	7.43854	7.80694	8.63773	7.61294	6.92042	9.00051	7.32325
ENSG00000063176.16_SPHK2	7.89239	7.46637	7.55171	8.28597	9.1807	7.68278	7.19833	7.55373	7.33567	6.8414	9.42785	9.87162	7.56355	6.81717	8.26896	8.0269	7.55879	6.41165	8.64806	7.81553	7.65271	7.15293	7.04445	7.68743	7.6372	6.50093	7.8642	7.37784	8.07892	7.27576	8.4893	6.61229	8.14385	7.68964	8.05801	8.34692	8.51273	7.78917	7.184	8.12112	7.78763	7.59032	7.51561	8.34811	7.67931	6.49884	7.82377	7.49212
ENSG00000063177.13_RPL18	10.4496	10.7782	10.9093	11.6007	11.1386	10.187	11.11	10.7133	9.34959	11.483	11.4749	11.6703	11.1356	10.6046	9.94709	10.7351	10.4143	11.0565	10.2268	10.8095	10.4544	10.1289	10.4219	11.1439	10.5168	10.2843	10.3574	10.4446	9.74917	10.506	9.99605	10.481	9.90241	11.5844	10.5291	10.9734	10.0204	11.1228	9.48303	11.1108	10.5462	10.7197	10.5608	10.1514	10.005	10.7319	10.2892	11.593
ENSG00000063241.8_ISOC2	7.73958	7.53257	8.10889	7.92222	8.30536	6.68271	8.37731	7.76841	6.46127	7.20958	7.92086	7.57293	8.11972	7.02549	7.14307	6.71802	7.5581	7.25922	7.42561	7.07438	8.04795	6.91956	7.10136	6.95801	7.08125	6.99654	7.35006	7.54671	7.1488	7.42197	7.19306	6.77979	6.65712	7.19945	7.6112	6.36855	7.50009	7.37459	6.52916	7.30246	7.31553	7.50433	6.89173	7.19615	6.99621	7.36246	6.45317	7.38933
ENSG00000063244.13_U2AF2	9.14671	9.25016	9.07684	9.74193	8.65983	9.73693	8.9915	10.1911	9.43652	9.6613	9.59898	10.7721	9.64048	9.56069	9.36702	9.34401	9.33102	9.3123	9.15834	9.23061	9.27773	9.30331	8.8849	9.32	9.26821	8.55277	9.24608	9.91461	9.31298	9.64241	9.28464	9.66875	9.33017	9.61011	9.08029	10.1276	9.0432	9.20305	9.21562	9.4102	9.13047	9.42896	9.3331	9.21302	9.22401	9.19773	9.97746	9.55236
ENSG00000063245.15_EPN1	10.2267	10.2622	10.2776	10.5864	10.5691	9.62509	10.0793	10.2896	10.2148	9.44984	11.2538	10.9238	10.1226	9.98673	10.1878	9.42449	9.9798	9.35209	10.7405	10.09	10.1578	9.15549	9.6336	9.4502	9.95981	8.71807	9.99615	9.81769	10.6221	9.63093	10.4786	8.67703	10.3894	9.3537	10.0356	10.5802	10.4874	9.93276	9.94935	10.3991	9.89004	9.55573	9.68604	10.4639	9.63088	9.36532	10.0302	9.751
ENSG00000063322.15_MED29	7.33664	7.4647	7.60695	6.95916	7.53799	7.22876	7.47069	6.24248	7.57478	7.41138	7.47683	7.65348	7.77279	7.48585	7.8069	7.05062	7.90279	7.46967	7.43506	7.83019	7.3003	7.39087	7.7718	7.54146	7.49692	8.24874	7.53168	7.04577	7.95299	7.38671	7.95672	6.82192	7.95016	7.51307	7.7972	7.67463	7.58926	7.85228	7.07104	7.54384	7.62237	7.30992	7.3839	7.53288	7.32909	7.32317	7.40864	7.35529
ENSG00000063438.20_AHRR	5.35902	3.11064	4.53115	6.8327	1.7056	7.18524	3.53504	6.48407	5.40136	2.85122	6.12742	5.97808	4.02587	4.03796	4.08975	4.57322	4.51552	4.64399	3.93555	4.87608	4.83205	5.61048	4.47608	4.31395	4.72799	5.53529	4.41479	3.42158	4.45177	4.66519	5.14945	6.06448	5.58927	4.45875	5.12453	4.46266	4.26862	4.86139	6.14905	4.99787	5.52799	4.67484	4.99312	5.82971	5.42627	5.90721	4.76678	3.50749
ENSG00000063587.15_ZNF275	6.67746	7.03307	6.04252	7.50816	5.0112	6.5796	6.96873	7.70025	6.61481	7.56002	5.24696	7.47419	6.9905	7.81906	5.97789	6.93583	7.45359	7.30431	6.27605	7.18192	6.35598	7.70757	6.89097	8.02957	6.6412	7.52568	6.35446	7.20402	5.89999	7.67904	6.03109	7.77776	7.11756	8.02893	6.92008	7.44464	6.29301	6.74738	7.08964	7.70947	7.02224	7.13948	7.63936	6.52184	7.51649	6.63474	7.33748	7.16189
ENSG00000063601.17_MTMR1	6.54531	7.2037	6.99227	6.51618	5.16332	6.50551	6.59097	5.96537	6.49698	7.4926	5.55428	5.30297	6.8307	6.92302	6.83243	7.22618	6.41609	7.12208	6.4787	6.80957	6.72914	7.74951	6.65408	8.06084	6.9193	6.80487	6.907	6.75285	7.04258	7.14068	6.61869	6.57738	7.00601	8.01229	6.98344	6.67662	7.0809	7.22124	6.64331	6.42043	6.95068	6.78746	6.93041	6.69818	6.96158	7.21644	6.83843	7.38713
ENSG00000063660.9_GPC1	7.0424	5.61042	6.50527	7.19649	9.21551	8.64211	6.99945	8.02779	6.83442	6.19078	7.21282	7.54113	6.48459	5.60789	6.84909	7.85275	6.04478	7.67862	5.77064	5.81175	6.68111	5.94858	7.24073	5.98004	6.31939	9.00504	6.29498	7.09933	5.78918	6.70587	5.30613	6.69246	6.21127	5.42885	6.68789	6.85221	5.91109	6.18382	7.10808	7.51387	6.17493	6.34207	5.61644	5.73949	5.84848	7.3679	6.40695	6.32513
ENSG00000063761.16_ADCK1	6.05676	6.11124	5.71857	5.74814	5.98399	5.42685	5.65852	6.48896	5.38868	4.89059	6.07785	5.86001	5.8148	6.03825	5.87503	5.05756	5.83183	5.20817	5.78058	6.06223	5.53278	5.48959	5.69241	6.03568	5.5005	5.69606	6.16396	6.14165	5.16701	5.70397	5.93721	5.34623	5.73554	6.06463	5.69542	6.25498	5.76386	5.7254	5.69682	6.36724	5.75762	6.1927	6.09646	5.77813	5.54027	5.36458	5.88137	6.38202
ENSG00000063854.13_HAGH	6.76694	7.42435	7.141	6.41955	8.43709	6.74744	6.61088	7.05044	7.08642	6.33505	8.42774	8.31232	6.93729	6.7034	7.48197	6.58395	6.70715	6.76513	7.42453	7.66547	6.61984	7.1249	7.10183	6.27498	6.54113	7.5617	7.04285	6.01918	7.69697	7.16894	7.56061	6.4443	7.38157	6.36376	7.10386	6.60761	7.20139	7.6072	6.99098	6.79905	7.24318	6.34094	6.78768	7.28851	6.89587	6.46275	7.81886	6.83305
ENSG00000063978.16_RNF4	8.06765	7.94473	8.0132	8.83948	9.01228	8.28805	8.44237	8.21261	7.95149	7.2198	9.20989	8.91319	8.36277	7.93122	8.15304	7.32482	7.92976	8.0887	8.08381	7.8437	8.17094	8.43505	7.85546	8.29194	8.06469	7.96972	7.95237	8.38836	8.27098	8.22149	8.27601	7.93278	7.98585	8.35496	7.93605	8.07452	8.14324	7.72511	8.16875	8.61107	7.88549	8.04991	7.95937	8.11824	8.16211	8.28128	7.86165	7.817
ENSG00000064012.22_CASP8	7.2766	7.1752	7.46867	7.94078	7.53757	7.82702	7.43559	7.83135	7.64551	7.09863	7.2698	7.83488	6.99169	8.22338	7.94997	7.49674	7.36449	8.0866	7.5998	7.53586	7.38801	7.57248	7.22448	8.00594	7.5405	6.19493	7.19499	7.9609	7.75042	7.70067	7.26904	7.08185	7.89172	7.8389	7.26887	8.25433	7.72225	7.90347	7.21798	7.60367	7.53542	7.62069	7.39274	7.86658	8.43948	7.81135	8.00222	7.30901
ENSG00000064042.18_LIMCH1	6.13661	5.04497	5.27509	6.87531	6.31388	7.72085	5.87628	6.13476	6.78205	5.28227	5.7976	5.63214	6.94966	5.34278	6.03241	4.2769	6.84384	6.00401	4.80435	6.2856	5.95357	6.74794	7.68806	4.47291	5.72626	8.4284	7.15963	4.10336	5.28583	7.12118	6.03999	7.74504	7.08059	4.60374	6.3608	5.43947	5.56417	7.15491	6.33115	5.14518	6.71488	6.81139	6.15242	5.85635	5.716	5.0203	7.34001	5.3614
ENSG00000064102.15_INTS13	5.1422	6.10641	6.13314	5.09628	1.7056	5.82597	5.56682	5.00877	4.78865	7.20656	4.63579	4.41978	6.03358	6.28563	5.33512	8.0294	5.85263	6.85583	5.1181	6.51033	5.72403	6.97467	5.58211	6.78875	5.83448	6.26661	5.934	6.51458	5.12824	6.52244	5.26304	6.17324	5.00871	7.0459	5.5472	5.60888	5.57007	6.38808	5.14583	5.43618	5.89322	6.23222	6.55035	5.3824	5.78696	6.41417	5.2592	6.66701
ENSG00000064115.11_TM7SF3	7.82495	7.61418	8.12222	6.5045	6.38489	6.61637	8.0373	6.45385	7.18285	7.86014	5.73659	6.0918	7.95415	7.44412	7.5991	8.26131	7.04264	8.65396	7.09727	6.67003	8.04644	8.3302	7.94432	8.29266	7.42027	8.01077	7.58384	7.07632	7.41047	7.65729	7.36264	7.52257	6.94086	8.67309	7.39799	6.9685	7.35177	8.48179	7.15984	6.99024	7.37993	7.96405	7.82616	7.07095	7.38043	7.97906	7.07496	7.35893
ENSG00000064199.7_SPA17	5.16399	4.5813	5.47098	3.55549	3.60965	3.59518	4.66643	3.87436	4.72916	4.68636	5.25484	1.7056	4.74379	4.54037	4.34267	4.18592	4.77548	5.6688	4.50362	5.85022	4.98907	4.6657	4.93452	4.96404	5.1433	4.11578	5.11242	4.68245	4.73067	4.45658	5.01469	4.48081	3.99653	4.77161	4.85253	3.31316	5.11372	5.37909	5.20235	4.18261	5.0253	4.85437	4.20987	4.72989	4.83294	4.62818	4.07015	4.00838
ENSG00000064270.13_ATP2C2	9.90612	9.43314	9.59749	8.76196	9.63255	9.01364	10.4721	9.74986	10.3256	8.37509	9.40123	9.36265	8.9265	8.27519	9.28648	8.97262	8.76438	7.1609	9.52604	8.66689	9.73067	8.74522	9.54155	8.13726	9.616	3.05274	9.35586	9.42319	8.58662	8.48325	8.75503	10.0718	9.16566	8.33901	8.80747	8.35739	9.07278	9.31757	10.6516	9.49117	9.31107	9.29699	9.25227	8.84152	9.64274	6.0882	9.29372	8.44396
ENSG00000064309.16_CDON	4.54859	5.00369	4.46617	4.3056	1.7056	6.06122	4.92573	3.90967	4.26916	4.82459	4.53954	3.34624	5.17934	4.66106	4.57537	4.78103	4.79679	6.10597	3.59981	3.85684	4.96343	5.46026	8.02777	5.14052	4.66132	10.1135	4.61855	4.77186	4.7142	5.71337	3.93873	6.63432	3.88702	5.51158	5.4892	6.23537	4.65008	4.9637	4.65317	4.79295	4.477	5.01366	5.28122	4.24958	3.17362	4.64032	4.47484	4.40931
ENSG00000064313.12_TAF2	7.43596	7.41722	7.66182	7.2216	6.14385	7.58197	7.45188	7.40202	7.29508	7.76951	7.37768	6.38856	7.50985	7.98482	7.38015	8.30363	7.18056	7.78053	7.02032	7.36627	7.48162	7.57241	7.4243	7.41737	7.5478	7.59983	7.48222	7.28413	7.36518	7.63314	7.66258	7.608	7.58692	7.72166	7.58162	8.46221	7.69126	7.48401	7.65877	6.93244	7.29939	7.65068	8.4251	7.27681	7.42827	7.89268	7.50189	7.74425
ENSG00000064393.16_HIPK2	9.82482	9.22008	9.43149	9.17675	9.10213	9.39927	9.35048	9.46874	9.70654	9.33767	9.19175	9.27923	9.47039	10.2184	9.92479	9.00331	10.237	9.80248	9.57206	9.93371	9.24051	9.89689	9.35924	9.60173	9.63757	8.44328	9.62872	8.9858	9.79083	10.3997	9.80259	10.9582	10.0638	9.45199	9.61397	8.79457	9.97936	9.966	9.8305	9.17923	9.78403	9.91271	9.79597	9.30799	10.0196	9.58353	10.6236	9.91541
ENSG00000064419.14_TNPO3	8.52435	8.63333	8.77507	8.85446	7.83226	8.31312	8.6245	8.69662	8.79074	9.20368	8.43745	8.37184	8.9005	8.94749	8.67113	8.31375	8.64187	8.5188	8.5378	8.73702	8.84009	9.21395	8.5226	9.06202	8.62453	8.88193	8.71417	8.82725	8.52082	8.58679	8.61844	8.56816	8.43479	9.33312	8.61313	8.7238	9.00267	8.88008	8.58763	8.92663	8.38023	8.73702	8.67578	8.43873	8.56394	8.57135	8.42582	9.0371
ENSG00000064490.14_RFXANK	7.05179	7.32584	6.83357	7.70987	8.19981	6.92836	6.78049	7.31226	6.29297	6.97245	7.89849	7.63007	7.00539	7.11353	6.933	6.94804	6.59746	7.0194	7.09512	6.69416	6.84194	6.43731	6.4435	6.74903	6.54867	6.5254	6.5456	6.80638	6.69819	6.62496	7.09405	6.63066	6.89393	7.22399	6.83009	7.32129	6.87279	6.71803	6.22396	7.52489	7.06268	6.94891	6.84531	7.12107	6.63642	6.69431	7.41905	6.86813
ENSG00000064545.15_TMEM161A	6.37587	7.40598	6.29682	8.89663	7.99913	7.64582	7.04652	8.28104	6.48981	7.62872	7.61982	8.36417	6.84677	7.28419	5.97075	7.5824	5.69826	7.19056	6.65047	5.36368	6.25436	6.73602	5.90977	7.46692	5.79731	6.7716	5.6746	6.99373	5.33255	6.78775	6.02285	7.08796	6.07716	7.62931	6.1088	8.03655	5.88017	7.00788	6.46294	7.94208	6.12747	6.93242	6.81697	6.65685	6.28883	6.83264	6.16278	7.76028
ENSG00000064547.14_LPAR2	6.13208	6.18502	6.21851	6.29549	5.94495	6.73002	6.05791	6.48107	6.85252	6.0518	6.27153	6.73209	6.23575	6.27462	6.20908	7.63005	6.29365	6.7642	6.2405	5.9404	6.55174	6.45494	5.47564	6.12428	5.96635	3.97119	5.99336	6.64006	6.44582	6.72897	6.41645	7.25222	6.07311	6.36459	5.67526	6.41266	6.19946	6.60651	6.09023	6.19809	5.97	7.37673	5.92414	6.31427	6.28993	6.51382	5.8762	6.17893
ENSG00000064601.21_CTSA	10.5451	10.5986	10.8602	9.36429	9.41921	8.6459	9.16093	9.34171	11.252	9.47946	10.7964	9.48623	8.63647	10.2751	11.3332	8.59119	10.2624	9.89927	10.8308	10.3548	9.79458	10.7395	10.0817	9.60883	9.99942	8.25479	10.2339	9.26661	12.0223	9.43988	11.4375	8.36547	10.4009	9.68643	10.5286	11.0752	10.627	9.72844	9.72675	9.72452	10.6242	9.07316	10.6796	10.6661	9.67619	9.0025	9.90994	10.0187
ENSG00000064607.17_SUGP2	9.64577	9.27741	8.39329	9.61151	9.77678	10.4672	9.3533	10.4318	9.76495	9.3172	9.14932	10.4477	8.7513	9.49851	9.35038	10.0819	9.5024	9.43745	9.38883	9.39233	9.05194	9.53636	9.30952	10.0855	9.52815	9.36883	9.67872	9.76655	8.87311	9.78886	9.25084	10.5248	9.71764	9.8248	9.3446	10.908	9.14208	9.70417	10.1656	8.96754	9.59429	9.87462	9.4392	9.32932	10.0066	9.35824	10.1383	9.3407
ENSG00000064651.14_SLC12A2	10.5877	10.8806	10.8435	12.4529	12.4971	10.6693	11.1268	11.1358	9.04605	11.8468	11.0861	12.0976	10.5225	11.2602	9.65566	11.6468	9.95866	10.377	9.22504	9.0446	10.2758	11.6007	9.77796	12.5375	10.6814	9.29445	9.96787	13.029	9.63022	11.1363	10.1474	11.7399	9.18211	12.9307	9.74689	8.86619	8.77449	11.2471	9.26899	11.4615	11.0906	13.164	10.2533	9.47804	10.5044	12.3149	9.87958	11.9391
ENSG00000064652.11_SNX24	6.01787	6.08004	6.03229	4.12133	1.7056	5.37882	5.53653	5.96883	5.37414	3.30723	5.78278	4.05923	5.84836	5.20068	5.85351	4.22454	5.86919	5.9571	6.98589	6.17122	5.17872	4.55658	5.87048	3.97386	5.70747	5.45284	5.31039	3.71241	6.0565	5.54365	6.08218	5.66633	6.12658	3.41274	6.16142	4.52859	6.60675	5.84291	5.89558	4.06466	5.81085	4.96354	5.73771	6.28229	5.38991	5.41032	4.04266	4.78512
ENSG00000064655.19_EYA2	6.51241	5.48262	5.6789	1.7056	3.55472	2.65096	6.00313	3.52406	5.62005	4.63805	5.35199	5.85716	6.46112	4.86264	5.66347	2.73351	6.21797	3.49261	4.78485	5.3537	6.21271	2.94421	5.73293	3.59008	5.02388	4.33939	6.31084	2.41155	5.60398	2.94308	6.76732	3.86103	5.45081	2.7765	7.35237	4.61686	6.51842	4.7948	5.97033	3.15726	7.04406	6.12061	5.49048	6.08341	7.03487	3.04051	7.75001	3.2823
ENSG00000064666.15_CNN2	7.46442	8.36836	8.29548	8.34171	7.69158	8.84704	7.3869	8.43483	8.37574	9.71707	7.86052	8.4412	7.26429	8.59482	8.24533	9.46753	8.23108	9.26287	7.81383	8.16874	8.31346	8.59387	7.7199	9.05864	8.10074	8.37279	8.02985	9.00667	7.70895	8.95358	7.76599	8.84464	7.80539	9.16447	7.53815	8.11727	7.31755	8.57675	8.03707	9.46191	7.84636	8.97389	8.07512	7.97002	8.25454	9.01922	8.08101	8.53081
ENSG00000064687.13_ABCA7	8.33178	8.05021	6.95863	9.56587	9.92513	10.2303	7.75411	9.83177	8.29726	7.64524	9.99802	10.6563	7.40182	8.67442	8.90155	9.94549	8.54525	8.7873	8.54175	8.48529	7.72095	7.5589	7.08622	7.59615	8.19019	6.26707	8.2554	8.65804	8.4009	8.85356	8.35987	10.042	8.86825	7.14666	7.95276	9.25856	7.40956	8.38483	9.07853	9.3683	8.81228	9.12808	8.33553	8.89765	9.00801	8.70407	9.72006	8.03665
ENSG00000064692.20_SNCAIP	4.27876	4.53942	2.71304	1.7056	1.7056	4.48274	3.09379	5.3002	3.6734	4.26524	4.24021	4.45822	4.52561	5.35812	3.55854	4.23305	4.29375	2.3705	3.2674	4.67512	3.87183	4.57924	4.45003	3.99849	3.21478	4.67817	4.23004	5.48917	4.53326	4.03828	4.50168	3.4228	3.58924	3.39115	4.58924	3.73294	3.767	4.42711	3.12914	3.775	3.91895	5.24201	4.5219	4.8245	3.52095	2.84874	2.76552	3.17762
ENSG00000064703.13_DDX20	6.06858	5.83128	5.77674	5.81173	3.80985	5.96306	5.50608	5.92267	5.22073	6.38116	4.46865	4.69556	6.37324	5.94311	5.26257	5.47505	6.08581	6.24521	5.59402	6.31263	5.76335	5.99363	5.69552	6.76635	6.46466	6.5335	5.89291	6.50646	5.41197	6.52594	5.74169	6.65098	6.15804	6.98733	6.14692	5.55605	5.78481	6.51751	5.78424	5.29756	6.08524	6.77976	5.83933	5.10003	6.20976	6.72139	6.0767	6.75657
ENSG00000064726.10_BTBD1	8.295	8.13147	8.96986	7.52358	7.26173	7.69613	8.394	7.53786	8.0926	8.01892	7.8883	6.62109	8.47819	8.25005	8.89059	7.55578	8.57232	8.38087	8.26463	8.79429	8.34889	8.50442	8.2706	8.19746	8.53469	8.33377	8.52211	8.1812	8.58945	8.46741	8.62686	7.45628	8.6015	8.38221	8.5422	7.53812	8.70619	8.45602	8.46008	6.16129	8.2914	8.21548	8.42411	7.70694	8.43718	8.52394	7.94135	7.75954
ENSG00000064763.11_FAR2	8.57563	8.14894	9.03775	6.15654	5.23937	7.17337	7.79773	7.03006	8.35557	8.12187	6.98041	6.18193	8.70791	8.08928	8.63006	6.75631	8.2248	6.35317	8.24072	8.61363	8.59379	7.98907	8.25291	7.69174	8.65488	6.68925	8.69582	7.28631	8.40481	7.44015	8.81269	7.78312	8.14134	8.02736	8.80998	6.18116	9.20782	8.20121	8.01719	6.81413	8.22029	8.18139	8.27267	8.08869	8.40636	7.72853	7.46379	7.21407
ENSG00000064787.13_BCAS1	9.31596	9.057	9.65531	6.91232	10.1831	7.95127	8.90349	9.12873	9.98882	8.30658	8.1554	8.84221	8.38258	8.89373	9.77097	6.39544	9.18149	7.48027	10.0713	10.4082	9.98218	6.65009	8.99539	6.79025	9.18342	2.55793	9.06688	6.54472	10.1469	7.01152	9.51228	7.19392	8.57899	6.12218	9.19768	6.52037	10.004	9.2515	9.57405	8.80385	9.0263	8.32625	8.90829	9.55342	8.34575	7.98366	9.60016	6.96884
ENSG00000064932.16_SBNO2	9.36322	9.5496	8.87307	11.0506	10.2418	11.6312	9.56239	11.6629	10.5792	10.1498	10.3614	10.6427	8.81363	9.70024	9.6819	9.65791	9.81729	10.0941	9.77958	9.4724	9.05608	9.70823	9.06429	9.34622	9.17289	8.239	9.17527	9.74681	9.69203	10.8298	9.75471	10.6169	9.78732	9.11194	9.08405	9.9022	9.44878	9.35587	10.0926	10.0188	9.4257	9.8585	9.83342	10.0303	10.0829	10.464	11.2085	9.27287
ENSG00000064933.18_PMS1	5.86178	5.94274	5.71672	5.32384	5.00952	5.46666	5.70737	5.80483	4.82954	6.58581	5.57899	5.21633	5.78039	6.16148	5.21642	6.30752	5.5632	6.50579	5.41379	5.68659	5.69412	7.07434	6.27314	6.24581	6.51513	6.58634	6.0983	6.52181	5.40284	6.21326	5.61948	6.44105	5.8103	6.47491	5.86181	6.60887	5.25496	6.15014	5.66372	5.20074	5.87291	6.67465	6.47079	5.1082	6.31739	6.73925	5.65463	6.27352
ENSG00000064961.19_HMG20B	8.24832	8.01235	7.86703	7.60595	8.37789	8.27514	7.34789	8.1227	7.9579	7.22054	8.8986	9.11572	7.80667	7.91824	7.72423	7.39842	8.16558	8.31394	7.97393	8.36632	7.78744	7.30064	7.78322	7.26422	7.65483	7.77755	7.89775	7.88307	7.56812	8.15601	7.81418	9.84885	8.19754	7.36255	7.84934	7.57614	7.57201	7.39472	8.30639	7.86925	8.01339	7.8571	7.44663	7.67604	7.42352	7.15482	8.42625	7.36585
ENSG00000064989.13_CALCRL	4.95361	3.89395	6.01862	3.38679	3.50151	5.91996	5.10156	4.24594	5.36581	4.90744	1.7056	1.7056	6.7994	4.7278	5.31929	4.92213	6.20041	4.90166	1.7056	5.80133	5.83101	5.42823	7.34166	5.15809	4.67453	6.88939	6.65576	4.10655	3.6157	6.50421	4.46579	6.35718	4.91971	5.11164	5.8663	4.03072	4.28396	4.71856	5.42475	2.48559	5.03971	4.02868	4.19186	3.38878	4.72876	6.0157	4.18741	4.78962
ENSG00000064995.18_TAF11	6.60893	6.9326	6.86087	6.18996	6.9588	6.13339	6.24241	5.82	6.45679	6.96329	6.70534	6.75725	7.108	6.64132	6.85715	6.30347	6.62095	6.73241	6.76779	6.53284	6.75701	6.84244	6.28964	6.51978	6.72335	6.74779	6.62113	6.62429	6.89373	6.4748	7.05391	6.13502	6.76043	6.49234	6.66854	6.3757	6.9527	6.55054	6.54563	7.24377	6.60892	6.07012	6.73428	6.98834	6.3507	6.24489	6.55945	6.85662
ENSG00000064999.15_ANKS1A	8.47989	8.64757	8.16557	8.10127	7.98269	8.47649	8.39846	9.04197	9.07871	8.80202	8.74342	8.38599	8.58901	8.48461	9.04947	8.77746	8.66411	8.162	8.87163	8.52484	8.48408	8.79305	9.12799	8.44081	8.40955	9.97146	8.32057	8.4391	8.83637	7.94872	8.86269	8.26439	8.90219	8.40394	8.68778	9.21116	8.90028	8.58026	8.67282	8.52432	8.55729	8.19935	8.33699	8.57791	8.56587	8.32274	8.73699	8.89492
ENSG00000065000.19_AP3D1	9.65985	9.83762	9.70003	10.6435	10.8615	10.3078	10.0377	10.6326	10.3823	9.79615	10.4953	10.9713	10.3847	10.0495	9.93344	9.87237	9.93028	10.1089	9.9938	9.92109	10.1357	9.92461	9.70443	9.62316	9.78897	9.733	9.68806	10.1097	9.88081	10.1178	9.87961	10.2508	10.0058	9.64427	9.68025	9.74533	10.4577	9.63339	9.99984	10.2795	9.80346	10.0279	9.95612	10.2143	9.85158	9.87858	10.149	9.99208
ENSG00000065029.15_ZNF76	7.10326	7.03973	6.55613	6.52832	5.27929	6.737	7.25777	8.15713	7.05859	7.14649	7.28589	6.21491	6.82868	7.25085	7.01761	7.41894	7.47942	6.50989	7.09505	7.39323	6.75061	7.08814	6.79664	6.97459	6.59241	7.39032	7.28198	7.36784	6.8986	7.29964	7.01911	6.81056	7.46908	7.00678	7.13539	7.46544	6.83414	7.25798	7.28751	7.24935	7.17888	7.00465	7.01983	7.15091	7.24021	6.82609	8.15089	6.89258
ENSG00000065054.14_SLC9A3R2	7.1866	6.98513	7.24491	7.80473	8.48013	7.96032	7.95353	8.30864	6.98822	7.26331	7.73164	8.62779	7.97393	7.40686	7.28031	6.87849	8.26719	7.11314	6.81479	8.17757	7.23161	7.2352	7.68206	7.12923	7.12076	7.71355	8.02843	6.3041	6.85146	7.20666	6.21663	8.48696	7.27496	7.16652	7.40253	6.71838	6.13561	7.71999	6.86523	7.73674	7.77874	7.62132	6.67915	6.80456	6.62442	7.00603	7.13947	7.49876
ENSG00000065057.9_NTHL1	5.47401	6.30945	5.96755	6.57271	6.71183	6.06956	5.98215	5.43876	4.94254	6.5986	5.64655	7.13216	5.83606	6.12351	5.52344	5.50844	5.51408	5.72797	5.59044	5.06447	5.97789	6.28221	5.49052	5.82944	5.23752	6.16906	5.3644	5.76312	4.45398	4.965	4.87101	6.24476	4.86076	6.51095	5.6943	5.61219	5.63768	6.64958	5.12813	7.00841	5.48673	5.69464	5.70751	5.44586	5.01858	5.20579	5.50895	6.57789
ENSG00000065060.17_UHRF1BP1	7.64951	7.63662	6.98343	7.8925	6.22884	7.83723	7.49647	7.9784	7.73918	8.10481	6.94025	6.9264	7.74255	7.68032	7.25399	8.4389	7.59996	8.15643	7.54526	7.153	7.18155	7.89572	7.46158	7.87474	7.39805	7.75174	7.5497	8.18416	6.78276	7.79391	7.27099	8.18529	7.40659	7.94657	7.21385	8.12784	6.99354	7.98917	7.95688	7.41724	7.25634	7.84968	7.41169	7.04135	7.8973	7.70626	7.85949	8.2097
ENSG00000065135.12_GNAI3	8.1297	8.18115	8.83519	7.47476	9.44229	8.27332	8.20189	7.52446	8.6708	8.74755	7.26593	7.73781	8.77131	8.51748	8.5314	8.00742	8.6723	8.66354	8.43133	8.91233	8.86033	8.22879	8.38932	8.39845	8.75649	8.56197	8.69907	8.25498	8.87971	8.73306	8.70465	8.80793	8.44977	8.65432	9.06065	7.50069	9.38216	8.39215	8.22524	6.47507	8.51741	8.18241	8.6465	8.42341	8.53817	8.68926	8.42562	8.47562
ENSG00000065150.21_IPO5	8.84477	9.86488	9.22571	10.2597	6.24392	8.60801	9.42666	8.67966	7.71439	10.5638	7.78743	8.43195	9.68749	9.60123	8.26502	10.0249	8.62044	9.94643	7.99915	8.89739	8.95491	10.299	9.21981	9.78891	9.34227	10.3168	9.18451	9.71451	7.78996	9.23466	8.28904	9.7084	8.19847	10.263	9.07277	9.53598	8.29336	9.27639	8.69608	9.56033	8.74294	9.63951	10.1009	8.50034	8.8167	9.76802	8.53135	10.7427
ENSG00000065154.12_OAT	7.13403	7.93912	8.0448	5.9493	1.7056	5.65442	7.9955	6.73558	7.84359	8.06035	4.73669	6.17637	8.3269	8.30396	7.08947	8.41772	7.85703	8.8472	6.78566	8.6142	7.91726	8.18455	8.15433	8.72494	7.94994	9.03895	7.51558	8.06174	6.94755	9.28034	7.68562	8.3297	7.11374	9.30919	7.96733	7.50072	7.52667	7.44643	7.15951	6.82994	7.86193	7.49738	8.01672	7.21843	7.1486	7.83747	7.4017	8.10737
ENSG00000065183.16_WDR3	5.93459	6.8218	6.61061	6.76097	6.19045	6.97554	6.88066	6.347	5.49079	7.30944	4.12561	6.19025	7.35833	6.93028	5.50557	7.10885	5.87196	7.69213	5.51406	6.3954	6.53624	7.07248	6.29803	7.26148	7.09815	7.06368	6.25116	7.28758	6.06952	6.90125	5.72655	6.84647	5.69734	7.62193	6.44153	6.78594	5.59253	6.69606	5.76845	5.87174	6.30414	7.28242	6.55419	5.96082	6.27211	6.94226	7.01311	7.51838
ENSG00000065243.20_PKN2	9.04653	8.71079	9.26449	8.37621	8.96034	8.36915	8.77502	8.1699	9.11167	8.45752	7.64042	7.74136	8.47203	8.72743	9.59745	8.16659	8.6355	9.26767	8.98512	8.21892	9.18301	8.58027	9.07041	8.67462	9.05097	8.87941	8.96868	8.6944	9.4211	8.74791	9.25024	8.92024	8.87641	8.93	8.90185	8.6024	9.43395	9.01309	9.3262	6.82869	8.87003	9.01268	8.88621	9.00656	9.13469	9.26168	8.62808	8.70118
ENSG00000065268.11_WDR18	6.51358	7.0527	6.54664	6.87276	4.26295	6.71319	6.56512	6.42522	5.97767	7.02819	5.33166	6.93256	7.32473	7.01682	5.79083	6.26713	6.68267	7.31006	6.12456	6.4017	6.82747	6.40211	6.46139	6.71912	6.57982	5.72247	6.60352	7.39978	6.21812	7.12684	6.2232	7.11485	5.99003	7.13545	6.68078	6.52426	6.19035	6.01746	6.14045	7.28579	6.09693	6.93491	6.34875	6.1101	5.99404	7.16583	6.29211	6.8177
ENSG00000065308.5_TRAM2	7.96322	7.24989	7.79584	7.35411	6.85654	6.77385	7.5927	7.19096	7.89057	8.70843	6.23609	6.09587	8.67987	7.76515	7.14803	7.43497	8.1419	8.36361	7.78581	7.7184	8.25261	8.49185	7.92159	8.42933	7.45069	8.16887	7.38862	7.80465	7.78474	8.33586	7.44141	8.67226	7.29998	8.47937	8.15275	6.98596	8.40154	8.27134	7.97675	7.34302	7.96284	7.86664	7.85056	8.27828	7.98025	7.76649	7.25531	7.71574
ENSG00000065320.9_NTN1	5.74752	5.16983	4.8706	4.5971	4.99709	7.18796	5.40935	5.25657	5.50489	3.74731	6.11012	4.01755	6.52105	3.71116	5.23842	4.70197	6.15115	3.55472	4.48318	5.16095	5.0474	5.05656	8.3113	4.04349	5.43645	9.59331	5.0873	4.27283	5.05222	5.16037	4.21971	5.10261	5.95636	3.45489	6.46717	5.09114	3.90136	5.00422	5.87693	3.75016	5.50133	4.88077	4.89396	4.73854	5.11462	6.48154	5.76814	4.89897
ENSG00000065325.13_GLP2R	4.34139	3.8637	5.05508	2.77462	1.7056	3.03054	4.56871	4.64671	5.21941	3.53518	6.27592	4.0676	5.83095	2.7998	5.59795	1.7056	7.04507	2.33786	4.90427	5.68531	6.0743	2.8838	7.18389	1.7056	4.99281	8.44011	5.77518	1.7056	5.57678	3.55414	5.1135	3.25418	6.21756	1.7056	6.23341	1.7056	5.08429	3.93255	5.12783	3.68752	6.21995	2.58286	4.41508	4.31742	3.73449	3.02469	6.28396	2.80995
ENSG00000065328.17_MCM10	4.9031	6.61633	5.20044	6.3942	3.803	5.51154	5.55298	6.05749	4.87252	6.7589	5.06488	5.66784	6.10385	6.3366	5.1546	6.97319	4.54204	6.70817	4.855	4.41494	5.9266	6.38112	4.85816	6.86371	6.35256	2.40282	5.86046	7.56323	3.68972	6.94006	4.78871	7.41279	4.06305	7.06949	5.17183	6.26211	5.04518	5.71913	5.82626	5.65945	4.81573	6.1622	5.93924	5.00013	5.70555	6.77803	5.87359	6.08292
ENSG00000065357.20_DGKA	8.17218	8.07493	7.93366	7.21561	8.94278	9.21704	8.11163	8.07461	9.43089	6.83613	9.68221	9.60289	8.39798	8.20296	9.11001	7.08123	8.82564	7.05032	9.52481	8.64555	8.67634	7.69604	8.14974	8.14196	8.4493	6.21882	8.79886	7.40527	9.41645	8.05604	9.51922	6.44375	9.01263	7.97103	8.45858	7.79921	9.83076	8.37394	8.92654	6.99993	8.7718	7.64752	8.53683	9.50947	8.83627	7.1793	9.78497	7.95831
ENSG00000065361.17_ERBB3	11.0116	11.0474	10.9323	11.0008	11.8551	10.8476	10.0718	10.6799	11.0193	10.4082	12.4879	11.1919	9.85249	10.9924	11.6589	10.297	10.2923	10.7136	11.3614	10.6164	10.5524	10.5734	10.6605	11.6439	10.5558	8.15652	10.3944	10.5478	12.1521	9.70838	11.6818	10.5262	11.1905	11.8159	10.7829	11.6667	11.4586	11.2426	9.94261	11.3352	10.8387	10.5062	11.042	11.6191	10.6264	11.4535	11.116	10.6756
ENSG00000065413.20_ANKRD44	6.80004	5.68942	6.11158	5.2193	6.07664	7.58357	6.72322	6.79537	6.00917	4.75556	6.45313	5.50476	6.11664	6.44972	6.89069	5.73178	7.56516	6.45256	7.45759	6.91942	6.27488	5.77897	6.72938	6.86708	6.87935	8.06361	7.4921	6.03603	7.25148	7.81199	6.93972	6.24047	8.34498	6.1307	6.57648	6.6044	6.92027	6.50994	7.62117	5.47368	7.28	6.49703	6.77227	7.06567	8.31261	7.1787	9.73995	5.4859
ENSG00000065427.15_KARS1	8.43644	8.62727	9.03548	8.44217	6.70102	8.19414	8.84374	8.26478	7.493	9.30126	8.02352	8.01889	9.27361	8.63562	8.21532	8.38555	8.4724	9.47506	8.17192	8.735	8.80075	8.98476	8.34661	8.72835	8.60582	8.53665	8.45358	8.6047	8.09997	8.96511	8.04859	8.36244	8.30772	8.96331	8.56185	8.20645	8.5033	8.85245	7.87656	8.25475	8.42934	8.85546	8.90093	8.41688	8.77305	9.37348	8.16636	9.3426
ENSG00000065457.11_ADAT1	7.35501	7.51341	6.71956	6.81713	6.82379	7.67517	7.76905	7.27088	6.92302	7.40459	6.22874	6.39803	7.11468	7.11485	6.95832	7.49241	7.7341	7.10918	6.85402	6.80626	7.36941	7.95944	6.7579	7.0455	7.15145	6.59164	7.13095	7.44475	7.10555	7.75081	7.33174	7.83628	7.09142	7.42756	7.16249	8.48584	7.22001	7.11089	7.49327	7.46851	7.17986	7.85119	7.78487	7.19002	7.63176	7.70742	6.99827	7.91091
ENSG00000065485.20_PDIA5	6.67568	6.75281	6.89182	7.53494	7.07167	7.10974	7.31709	7.6576	6.02159	7.15642	4.96121	6.88883	7.39716	7.01685	5.82522	6.68582	6.82273	7.70068	6.19975	6.49054	6.76702	6.53977	6.31693	6.96018	6.33457	6.14721	6.19736	7.20103	5.20029	7.37033	5.357	8.09694	5.52033	7.09048	6.4285	6.41709	6.17305	6.25442	6.43572	6.88273	6.01184	6.59734	6.31241	6.1977	6.0794	6.5587	6.30896	7.13006
ENSG00000065491.8_TBC1D22B	6.6624	6.24826	6.50584	5.81954	6.26817	6.36049	6.46719	6.0705	7.89586	6.38222	5.10402	5.21306	6.10435	6.4867	7.16647	6.08435	6.52646	6.45363	6.86396	5.97311	6.83373	6.6573	6.56274	5.84322	6.88742	5.87516	6.72345	6.51551	7.31161	6.46848	6.92438	6.05456	6.70395	6.15988	6.77532	6.49148	7.25539	6.82549	7.44904	5.97096	6.66559	6.19125	6.61084	6.91111	6.87147	5.66371	6.55054	6.23186
ENSG00000065518.8_NDUFB4	6.95634	6.89802	8.18267	5.27337	4.83469	5.02379	6.22914	4.89468	6.81412	7.1081	5.17492	4.93986	6.81362	6.72178	7.38466	6.56716	7.11704	7.37797	6.21341	6.98881	7.37437	7.08514	7.01167	6.40388	6.80613	7.34292	7.11143	6.00088	7.31434	7.1983	7.37098	6.31609	6.97778	6.74388	7.61045	5.28003	7.85347	7.01502	6.84681	5.69786	7.11721	7.25969	7.05121	6.34515	6.89878	7.22963	6.4005	6.50296
ENSG00000065526.12_SPEN	9.76095	9.62254	9.29769	9.64707	8.97336	10.1116	9.60213	9.76366	10.717	9.80632	8.97258	9.02044	9.72178	9.68416	9.9282	9.81313	9.63483	10.1707	9.79469	9.4932	9.7346	9.8213	9.796	9.83148	9.82189	9.66448	9.85522	10.2421	9.95667	9.75893	9.92656	10.0502	9.91687	9.91723	9.76257	9.98919	10.1517	9.64864	10.2335	9.56128	9.73336	9.35037	10.0072	9.86876	10.0349	9.69771	10.1686	9.84705
ENSG00000065534.19_MYLK	8.63763	9.58729	9.66441	7.3502	10.8652	10.0333	8.39651	9.12084	10.8505	8.85606	11.2674	9.89384	7.93	7.84949	10.8777	6.47672	9.93628	6.27981	9.83072	9.56018	10.306	7.77862	13.0977	7.42312	9.69392	15.9129	9.9889	6.46879	10.9698	8.35654	9.7235	8.42677	9.80942	7.11644	9.57951	7.56345	9.85756	7.96382	9.69018	8.17094	9.81666	6.49242	8.65941	9.58917	8.812	6.59858	10.1693	7.47591
ENSG00000065548.18_ZC3H15	7.14263	7.52706	7.87412	6.70099	3.59081	6.84229	7.69249	7.17628	7.32044	8.32175	7.79425	6.69208	7.56516	7.96931	7.39737	7.6861	7.55777	7.94787	6.81048	7.52511	7.55921	8.126	7.37462	7.28269	7.89725	7.69555	7.22564	7.53543	7.53998	7.55787	7.51893	7.0703	6.88065	7.57501	7.62394	7.35009	7.65919	7.44464	6.8551	6.90107	7.36508	7.69502	7.52692	7.44395	7.42735	7.57752	6.9729	8.00405
ENSG00000065559.15_MAP2K4	7.21134	6.59081	7.73939	4.32657	1.7056	5.45808	6.94674	5.36137	7.33242	7.1174	4.20903	3.41717	7.20907	6.84789	7.80305	6.80089	7.4636	7.51961	6.84079	7.44629	7.38961	6.13665	7.34211	6.49065	7.34425	7.38473	7.36866	6.96678	7.87628	7.39851	7.57827	7.08975	7.30175	7.03106	7.49307	6.64974	8.00005	7.08927	7.36583	5.705	7.1614	6.87929	6.93699	6.97928	7.42484	7.55655	7.13283	6.3783
ENSG00000065600.13_PACC1	4.47826	4.7526	3.57663	5.38455	1.7056	5.15959	3.66818	4.81643	4.20865	6.22584	3.16619	5.61418	4.51207	5.14291	4.14648	5.64407	4.14455	5.84949	4.3266	4.04489	4.26864	5.49198	4.10774	6.23924	4.16113	4.85746	4.76686	5.13396	4.30386	5.42011	3.7267	5.47224	4.75086	6.38202	3.95255	5.49257	4.39859	5.02234	4.5967	5.58031	4.51556	5.21033	5.45334	4.84133	4.41359	5.55603	5.02502	5.82003
ENSG00000065613.15_SLK	9.30027	9.16124	9.5131	9.15369	10.9187	8.96227	9.11239	9.09116	9.991	9.26046	10.0179	9.67915	9.49045	9.33924	9.70964	10.0936	9.47907	10.8906	9.63008	9.26062	9.74102	9.73549	9.58055	9.66206	9.36751	10.3191	9.27828	9.06293	9.83883	9.04993	9.73062	9.09994	9.51313	9.89381	9.31928	8.17764	10.2726	9.44048	9.42671	9.00159	9.21844	8.92478	9.21415	9.69626	9.49827	9.98848	8.99714	9.4348
ENSG00000065615.14_CYB5R4	6.64627	7.16042	6.80494	6.72162	8.50341	6.14028	6.66358	4.53406	6.54085	7.35365	6.20823	8.18843	6.58078	7.1849	7.5183	7.1266	6.94445	7.50025	7.28681	6.73201	7.75104	5.9287	6.90714	6.20571	6.45482	5.935	6.5262	6.12392	8.06112	6.84989	7.00348	6.06483	7.07406	5.92474	7.29827	5.12713	7.53078	6.80656	7.37315	7.51808	7.64471	6.45222	6.80732	7.32552	7.53053	7.47257	7.37861	7.17088
ENSG00000065618.21_COL17A1	10.4933	10.6794	10.2562	9.23374	12.6846	8.76763	9.40197	10.6669	11.7648	9.31782	11.8855	11.3365	9.4103	10.0088	11.8998	9.01635	10.7834	10.2364	11.1556	10.1598	10.8806	10.4609	10.4107	10.2282	10.1351	4.17142	10.105	8.8846	12.0601	10.1463	11.4961	6.23447	11.1916	10.335	10.933	9.78058	11.8818	10.6093	10.1301	10.2266	10.3813	9.62061	10.7944	12.011	10.3498	8.9394	11.6366	10.591
ENSG00000065621.15_GSTO2	6.36459	6.0984	6.80397	5.04572	5.78584	6.72509	6.58893	6.28699	5.15542	6.65162	5.47085	5.3767	6.62471	6.16649	5.40873	6.65729	4.70997	6.10044	5.28583	5.178	6.06456	6.02473	5.4171	7.2615	6.12965	3.90728	6.27219	6.02863	5.27214	5.95621	5.7926	5.19626	5.71737	7.63918	5.82598	5.84115	5.36111	6.44756	5.56915	6.20083	6.44546	6.94607	5.46373	5.89622	5.60949	6.88703	5.57174	7.26964
ENSG00000065665.21_SEC61A2	5.20979	4.20459	4.45899	5.41367	3.56169	5.00834	5.04988	3.81818	4.91321	4.76303	4.74287	4.6903	3.90972	4.54079	4.68641	5.28722	3.52111	5.65256	4.64787	4.1157	4.72988	5.38207	4.9794	5.63163	4.9423	5.05043	4.71886	5.13977	4.6959	5.04005	5.19495	5.31441	4.86277	5.4273	4.34277	4.76923	4.71817	4.68764	5.45675	4.97371	4.2971	5.08379	4.36297	4.68857	4.77888	4.75111	5.79746	4.83709
ENSG00000065675.15_PRKCQ	4.49061	3.36268	4.07593	4.13926	1.7056	5.49129	4.57515	3.52048	3.53147	5.50583	1.7056	1.7056	3.99399	5.02655	3.92583	4.40977	4.27619	5.92518	4.5058	4.85818	4.3035	4.1079	4.20185	6.24793	4.82959	3.7913	4.89985	4.99062	4.53205	4.66883	4.16971	2.98597	5.38544	6.30989	4.36283	4.91546	4.89525	5.90389	4.97071	2.9579	4.04325	4.80704	4.24553	4.41216	5.34995	5.81572	4.65083	4.07685
ENSG00000065717.15_TLE2	7.47142	7.48708	7.7072	5.47105	8.96693	7.2239	8.18133	8.97559	8.59483	9.00378	8.47749	9.34965	7.5821	8.40486	7.09906	7.03651	6.80962	7.42262	8.10585	8.0761	7.28549	6.9402	8.34003	7.96684	8.3404	8.5284	7.31268	7.90906	7.45429	6.14603	7.62176	6.29136	7.7879	7.72276	7.31558	7.63232	6.90546	6.63214	7.24576	8.3021	8.13902	7.32546	7.87571	8.1991	7.79651	6.49247	8.3259	7.64299
ENSG00000065802.12_ASB1	7.17999	7.31378	6.17436	8.4109	7.21324	7.52124	7.16447	8.24401	6.74792	7.54459	7.3916	8.03903	7.12622	7.23599	7.13336	8.1013	6.59418	6.84241	7.51351	6.99418	6.72899	5.64815	7.09695	6.82522	6.73793	7.93335	6.58662	7.41083	6.9085	7.26042	7.61146	6.83961	7.36357	6.2281	6.75326	8.68551	6.79552	6.26384	6.89098	8.08397	6.81032	6.90221	6.81458	7.5732	6.90268	6.99688	7.86684	7.13945
ENSG00000065809.14_FAM107B	8.78541	8.18395	8.89376	5.99715	6.6221	8.40133	8.00774	6.80515	8.84959	7.84219	8.62424	7.59695	9.36371	8.45329	8.49921	5.31521	9.37781	8.76079	9.03497	9.52437	9.04381	6.39715	7.91974	7.8798	8.1828	7.24344	8.64822	6.4387	8.70671	8.74999	9.09362	8.09395	8.86337	7.71486	9.63869	6.61506	10.2815	9.21856	9.17607	6.25739	8.50464	7.51982	8.22698	8.96955	9.3063	9.07182	8.83075	7.35096
ENSG00000065833.9_ME1	5.90468	6.18734	5.6864	6.14016	3.593	7.31776	7.17568	6.5879	6.16737	6.05956	5.45442	6.83776	7.14687	7.20642	6.28499	6.005	7.23159	7.2599	5.9633	6.48805	8.01734	7.45779	5.97639	6.47003	5.7946	7.09504	6.76116	8.53194	5.89413	7.85033	6.77634	7.45549	5.95601	6.96184	6.61027	5.73439	7.75554	7.7679	6.71053	5.39671	5.62516	7.50171	6.45078	6.8997	6.45583	5.25153	6.52268	6.23172
ENSG00000065882.16_TBC1D1	8.07403	7.79914	8.1855	7.7483	6.85343	8.20434	7.49702	8.22584	8.99057	7.56642	8.33857	7.72804	7.90979	7.45599	8.89153	7.08584	8.61707	8.86499	8.25608	8.848	8.01928	8.41529	9.64746	8.17534	8.43301	11.4608	8.52784	6.62532	8.77151	8.57163	8.77615	8.31499	8.43465	8.08459	7.85899	7.95569	8.92625	8.49387	7.92464	6.77602	8.18355	8.09006	8.57352	8.46372	8.75538	8.50992	8.61365	7.16859
ENSG00000065883.16_CDK13	9.2044	9.31933	8.69896	10.6718	11.7321	10.2214	9.21046	10.8572	9.52102	9.48645	11.6279	11.7258	8.63295	9.61282	9.34961	8.78698	9.42607	8.86738	9.87881	9.54824	8.87922	9.12477	8.86645	9.24338	9.03889	8.75206	9.10288	9.37247	9.38931	9.15269	9.41089	9.58417	9.70637	8.98825	9.11498	9.89584	9.21197	9.06681	9.51358	10.6094	9.54136	8.95896	9.44842	9.75827	9.1077	8.72152	10.4186	9.18935
ENSG00000065911.13_MTHFD2	6.75112	7.56205	7.7656	7.67607	5.65766	7.59363	8.28132	7.29293	6.16442	9.0671	6.92452	6.87806	8.29458	7.7644	6.98925	8.3137	8.34069	9.10474	6.23861	7.8669	8.11828	7.81138	6.93194	8.61912	7.44323	6.2676	7.84132	9.15599	5.61707	8.96991	6.29348	8.87105	7.24567	8.83459	7.57422	6.89794	6.23476	7.9332	6.83899	6.33936	7.50796	7.70725	8.65297	7.23656	7.87624	8.94012	7.17386	8.35473
ENSG00000065923.10_SLC9A7	4.15861	3.66894	4.71503	7.32198	5.23541	6.24876	5.83295	5.33532	4.7619	4.29058	3.55349	4.4043	4.42809	6.36856	4.70331	6.58002	4.99847	8.21337	5.88542	5.18447	4.72043	7.00035	6.26356	7.43826	5.47923	6.4563	5.17117	6.04141	5.0604	6.97332	4.26608	6.33615	5.36895	7.50058	4.96682	8.14416	5.41375	7.15528	4.97166	5.85722	5.50187	6.40812	5.86748	4.98897	5.70745	7.58668	7.66758	5.31735
ENSG00000065970.9_FOXJ2	6.78542	6.84186	6.8725	6.87834	6.70835	7.61194	7.16838	7.52029	6.81722	7.1845	6.52783	7.09543	7.02118	7.09884	7.24838	6.08322	7.07555	7.54572	6.87276	7.42117	6.77587	7.29932	7.6494	7.27713	7.32553	8.24835	7.07936	7.27275	7.27418	7.37387	7.11883	7.66167	7.2125	7.27621	7.10012	6.3188	7.09961	7.08296	6.98312	7.03488	7.25989	7.24059	7.38157	7.20502	7.37488	7.32411	6.95858	6.55132
ENSG00000065978.19_YBX1	9.61916	9.3253	10.2028	9.09064	7.72782	8.57045	9.29841	8.85674	9.09807	10.4925	8.02208	8.27331	9.95699	10.0458	9.51055	9.39177	10.1191	10.2174	9.05561	10.1987	9.70261	9.79605	9.7085	9.71469	10.0539	9.54085	10.3113	9.70478	8.71523	10.2028	9.50805	9.69611	9.67738	10.1642	10.0564	9.52448	9.51827	10.2153	9.66606	8.67706	9.74093	9.99202	9.99414	8.65506	9.71329	9.82728	9.74489	9.82667
ENSG00000065989.16_PDE4A	6.11841	6.06695	6.3614	6.65701	6.17805	6.99719	5.79461	7.58879	5.83633	7.26788	5.92161	6.61722	6.01207	7.30789	6.29667	7.50295	6.46223	6.74322	6.17709	6.8725	6.11492	5.9021	6.76657	6.79646	6.24091	7.43339	5.85926	6.66233	6.26876	6.43078	6.67927	7.80113	6.42957	6.41056	6.10016	7.32113	5.95908	7.26511	6.84742	7.17874	6.80429	7.00179	6.2359	5.61931	6.30562	7.36169	6.44673	6.75278
ENSG00000066027.12_PPP2R5A	9.18141	8.79034	9.35891	8.83423	10.6915	8.83508	8.56309	8.72269	8.95232	8.79607	9.96068	9.39452	8.74245	8.3306	9.44237	8.78836	8.90209	8.35491	9.52816	9.40061	8.99432	8.428	8.78982	8.28209	8.80272	8.37771	8.81038	8.69419	9.58517	8.64376	9.35341	8.52068	8.96058	8.53936	9.27383	7.92184	9.73865	9.13218	8.42615	9.17024	8.77546	8.09334	8.82315	9.23583	8.94895	8.11284	8.92623	8.19849
ENSG00000066044.15_ELAVL1	7.87465	7.65941	8.42386	7.87904	8.26688	6.2676	8.09963	7.19756	7.68156	8.8345	6.18651	7.10104	8.91729	8.19283	7.7686	7.9687	7.78469	8.66176	6.65642	8.00556	8.15978	8.13337	7.6727	8.40344	8.37695	8.50284	8.53608	8.79964	7.65886	8.36159	7.67564	8.08069	7.76705	8.29938	8.21648	6.76218	8.35821	7.54477	7.43426	8.05456	7.51203	8.2804	7.8923	7.21697	7.95284	8.53532	7.88257	8.15667
ENSG00000066056.14_TIE1	5.94957	5.12825	5.00186	5.46465	5.99573	7.22128	6.41785	6.66455	5.36512	5.04284	6.68418	5.20592	7.02109	5.23458	6.05385	4.13702	7.41178	4.96598	4.60304	6.52081	5.51562	4.85786	7.27021	5.34013	5.26821	7.05295	7.0706	4.13047	5.55251	6.11187	5.2854	6.54087	6.32512	4.75876	6.21233	4.8807	5.09602	4.84656	6.36587	4.32213	6.02223	4.49831	4.7767	5.28777	6.22932	5.3573	5.55493	4.62015
ENSG00000066084.13_DIP2B	9.22962	8.91844	9.33858	8.93793	10.2722	8.75843	9.11208	9.10599	9.8775	9.56646	9.34347	9.76578	9.31975	9.17383	9.7855	9.47003	9.15916	9.51241	9.41122	9.32557	9.51343	9.11851	9.17588	9.63251	9.46029	8.30571	9.34595	9.23158	9.58606	9.15861	9.61007	9.15509	9.25515	9.75838	9.14639	8.73046	9.92407	9.51774	9.27693	8.81431	9.23941	9.29261	9.19503	9.27888	9.24596	9.03458	9.15615	8.80907
ENSG00000066117.15_SMARCD1	7.72778	7.56818	7.72625	7.6185	9.00998	7.55242	8.18034	7.25766	7.58759	8.14254	8.04042	8.19668	8.06302	7.88792	7.81586	8.03486	7.40204	8.05584	7.70772	7.33444	7.53903	8.0111	7.45862	8.46887	7.84638	7.61125	7.96523	7.85603	7.75044	8.0644	7.80184	8.21089	7.43141	8.78642	7.59085	7.79917	7.95372	7.69593	7.54526	7.75395	7.60752	7.98595	8.14072	7.87844	7.66014	8.1456	7.46495	8.261
ENSG00000066135.13_KDM4A	9.11199	8.91217	8.89526	8.36659	7.85543	8.65613	8.81218	8.30877	8.5054	7.86009	9.13213	8.71037	8.79286	8.43942	8.9477	7.98051	8.72664	8.04971	9.11361	9.03669	8.86422	7.99595	8.40053	8.16176	8.80009	8.22851	8.82408	8.85483	9.18467	8.68663	9.41023	8.66321	8.85651	8.09075	8.96178	8.25595	9.4359	9.42531	8.89499	8.50099	8.85727	8.67097	8.58809	9.20361	9.1063	8.28931	8.99761	8.61271
ENSG00000066136.20_NFYC	7.73458	6.96051	7.69364	5.84052	6.37148	6.9302	6.67686	5.63272	7.17734	6.77468	6.90707	6.19403	7.25613	6.93061	7.6554	5.91563	7.43487	7.01663	7.06399	7.5944	7.29628	6.84654	7.48591	6.91338	7.34009	7.33377	7.82066	7.02048	7.45962	7.10103	7.77576	7.20325	7.07924	7.07616	7.55176	6.23705	7.59914	7.87756	7.39838	6.45306	7.22598	7.41907	7.08992	6.93548	7.72378	7.34202	7.67599	6.54277
ENSG00000066230.12_SLC9A3	11.649	12.4833	10.0674	9.50539	11.4483	8.53861	8.1565	11.6187	10.8788	7.70382	13.2282	12.3696	10.3404	11.3917	12.2637	9.26597	13.3832	6.91565	13.5997	13.2261	10.871	11.9823	8.38119	9.89404	10.4677	5.72444	10.3863	6.89591	14.1478	9.6248	14.2542	5.27892	13.834	9.62789	13.1314	9.54454	13.1945	11.853	10.1853	9.08665	12.8217	6.89577	13.0847	13.965	12.0077	6.51792	14.1179	11.6266
ENSG00000066248.15_NGEF	8.37436	8.22508	7.68836	8.4467	9.01805	8.02146	7.59753	8.83606	9.0349	7.29977	8.88473	8.7175	7.78752	8.32907	8.70736	7.45207	8.19206	6.24944	8.69754	8.96207	7.78081	7.66459	7.90117	7.66127	8.17579	3.52396	8.34808	8.38647	8.69683	7.4803	8.7386	6.79971	8.50747	7.52577	7.97933	8.56389	8.53832	8.23808	8.60431	8.38978	8.73497	8.03248	7.76766	8.56653	7.98362	5.98171	9.7248	7.14234
ENSG00000066279.19_ASPM	8.37436	7.64111	8.05043	8.24716	6.22286	7.88826	7.55187	7.72347	5.37964	8.27769	5.27477	6.97183	8.29577	7.8544	7.06566	9.31876	6.88687	9.04735	6.77389	5.54935	8.31635	8.89153	6.90516	9.50443	8.2672	3.97896	7.98027	9.00336	5.32705	8.6588	6.70549	8.73116	6.49964	9.92323	7.06041	8.13169	7.21499	8.76181	7.83654	7.94305	6.77213	8.52467	7.59601	6.21601	8.18734	9.2308	6.45745	8.44306
ENSG00000066294.15_CD84	5.5041	4.22087	5.29436	1.7056	4.10469	6.68923	4.79946	3.4101	4.69201	4.85259	4.05516	4.29222	5.43345	5.99497	6.17723	4.15724	6.3185	6.64916	5.11529	5.7078	4.77089	4.96931	5.75958	6.39636	5.14962	6.08679	5.89182	4.84131	5.65461	7.347	5.69454	6.30521	6.94813	5.9738	5.39966	5.28752	5.32504	5.98459	5.12026	5.06784	6.61301	4.97207	5.91865	5.50529	6.9395	6.66355	7.11757	4.7149
ENSG00000066322.15_ELOVL1	8.2569	8.01903	8.61099	7.62424	8.71316	7.39294	7.99969	7.67001	8.44837	7.48991	7.82675	7.35343	8.74155	7.98926	8.75485	7.04572	8.4063	8.40653	8.36806	7.97679	8.77864	7.78569	8.13078	8.05875	8.18845	6.83988	7.9406	7.65965	8.98954	7.83562	8.63501	7.31733	8.20138	8.33596	8.46715	6.47016	9.76524	8.92074	7.95464	7.8944	8.10014	7.87277	8.05981	8.38993	7.83949	7.99126	7.15059	8.2401
ENSG00000066336.12_SPI1	5.01665	4.79263	4.86732	5.54372	5.06709	8.5716	5.18477	6.19634	4.44386	5.40936	6.28362	6.77316	5.31347	6.10964	5.72194	4.84181	6.76256	5.93644	5.27498	6.26308	3.96262	5.2286	5.46671	5.41014	5.5884	5.4584	5.16914	5.01067	4.80165	7.88259	5.14409	7.12887	6.59017	4.75204	5.45999	6.31564	4.52823	5.72798	5.21218	4.84505	6.34686	4.79489	5.85422	5.60987	6.28112	6.11333	6.55572	4.5134
ENSG00000066379.15_POLR1H	4.99514	5.63763	5.32255	5.23166	4.34213	4.05118	5.24613	5.18425	5.28683	6.74875	4.55448	4.31858	5.68067	5.26949	5.21978	4.73834	5.26728	5.65263	4.6886	5.46131	5.59626	5.62249	5.16028	5.37281	5.03303	4.68681	4.70622	5.18946	5.48743	5.21188	4.85245	5.13347	4.6327	5.51006	5.05463	5.05317	5.47681	5.84514	4.94098	5.67222	5.13106	5.05813	5.52132	5.04678	5.14011	5.54959	4.50048	6.24259
ENSG00000066422.5_ZBTB11	7.27007	7.37768	7.24019	7.53223	7.05526	6.99122	7.74471	7.02175	7.4538	7.4408	6.19188	4.79078	6.95036	7.03854	7.05972	7.90888	7.11631	7.68632	7.13406	6.72699	7.27992	7.28021	7.41668	6.96876	7.56322	7.5811	7.49967	7.47893	7.10219	7.47337	6.90494	7.19906	6.4257	7.29717	6.82695	7.54309	7.30534	6.7228	7.51846	6.58397	7.04524	7.57764	7.23709	6.91804	7.12074	7.55576	6.96215	7.0314
ENSG00000066427.24_ATXN3	7.24997	6.85555	6.90611	6.42439	8.47929	6.97273	6.23951	6.58851	6.84263	6.98616	6.82556	6.79933	6.52505	6.46893	7.0679	6.96056	7.5434	6.54206	6.86016	7.49554	6.65363	6.69291	7.51944	6.74089	7.51479	8.30642	6.81629	6.84583	7.68545	7.59095	7.25273	7.49462	7.00172	6.89118	7.03271	7.37693	7.11719	8.01919	7.70214	7.15898	7.84233	7.07351	6.70452	6.7046	6.79931	6.82733	7.85698	6.73302
ENSG00000066455.13_GOLGA5	7.29687	7.3611	7.95726	5.81712	4.23265	6.27261	7.30494	6.71081	7.8227	7.12905	7.00521	5.71444	7.29012	7.27624	7.91242	6.71331	7.63728	6.74903	7.04138	7.98077	7.85617	7.33921	7.38428	7.32499	7.62353	7.25306	7.53618	7.27485	7.62397	7.78268	7.54434	7.91514	7.72805	7.37394	7.64116	7.03371	8.15429	7.76907	7.37204	6.9396	7.38105	7.50807	7.64034	7.35066	7.40368	7.80576	7.14794	7.16197
ENSG00000066468.24_FGFR2	8.3978	8.1581	7.88526	5.82275	8.92966	7.35248	5.57982	4.45525	7.08585	5.17225	7.24413	8.7932	7.3051	7.02204	8.46448	6.63311	8.32082	7.65033	8.41667	8.12322	7.00875	6.33241	8.11462	8.15104	6.63863	9.98862	6.58111	5.77906	9.13685	6.63246	8.79963	5.99415	7.63028	7.92545	7.92867	5.50457	7.34236	8.2678	6.55276	6.95682	7.69574	7.89659	7.89171	8.8592	7.35858	5.62109	8.54308	6.82887
ENSG00000066557.6_LRRC40	6.24868	6.17098	6.618	4.81571	4.23259	5.1768	6.36169	4.54959	5.93272	6.31426	6.29178	4.73596	6.46843	5.90876	5.92864	5.85429	5.97921	6.6445	5.89013	6.0925	6.2854	5.64128	6.10331	6.08859	6.52259	6.8039	6.41453	5.68194	5.82953	6.18912	6.5477	6.05527	6.11934	6.62663	6.31493	5.37303	6.74302	5.83384	6.36185	4.73174	6.00999	6.23162	5.82407	5.77737	6.19295	6.00753	6.10243	5.83724
ENSG00000066583.12_ISOC1	6.64256	6.16852	7.29962	4.90965	7.58684	5.7384	7.26525	6.3935	6.12653	7.03421	5.81482	6.61779	7.19083	6.46704	7.06184	5.68471	6.88863	6.8674	6.00769	6.85191	6.69133	6.60185	6.72245	5.86	7.1817	6.23163	6.91717	5.91815	6.58866	6.71769	6.83243	5.99451	6.59648	6.31747	7.07019	4.88712	6.78672	6.39141	5.92152	4.31855	6.87937	6.55619	6.21516	6.08372	6.7393	7.27565	6.34136	6.37292
ENSG00000066629.18_EML1	4.49246	4.56429	4.27852	3.60029	1.7056	4.5362	4.5717	4.97498	4.95448	5.68456	5.11042	1.7056	5.94094	4.37556	4.94553	3.14663	5.68458	3.82349	3.98233	5.68768	5.11048	4.09829	8.41491	4.1895	4.26753	10.4267	5.24488	5.15224	4.58077	5.71328	4.32399	5.29457	4.62923	4.37221	5.84652	4.97404	3.42464	4.00631	5.0566	4.56269	5.01399	4.04694	4.24632	4.9017	4.76238	3.82852	4.84754	4.24838
ENSG00000066651.20_TRMT11	5.99922	6.38554	5.64513	6.38949	4.99732	6.79653	6.13197	5.98624	5.68176	6.44705	3.06927	5.20799	6.17071	6.02967	5.71061	7.2091	5.55237	6.82062	6.35112	5.15845	5.91307	6.89199	6.00452	6.31198	6.15704	6.0588	6.21173	5.92019	5.87668	5.96972	5.8346	6.57208	5.74152	6.32833	5.5435	7.56808	5.63744	6.78994	6.53386	5.2964	5.86639	6.61537	6.29903	6.21304	6.41519	6.41059	5.71422	7.0569
ENSG00000066654.14_THUMPD1	7.8569	7.69587	8.17931	5.97004	1.7056	6.79126	7.74465	6.60046	7.40335	8.13653	5.64699	6.07306	7.75427	7.25591	7.68813	7.2879	7.69765	8.00339	7.15165	7.59819	7.76769	8.71703	7.95479	7.6758	7.84585	8.78371	7.82	7.83919	7.75808	7.57409	7.68701	7.29855	7.54542	7.86373	8.04045	6.97058	7.76853	7.85712	7.75962	6.81308	7.85497	7.97093	7.73769	7.24081	8.19513	8.21721	6.90022	7.7767
ENSG00000066697.15_MSANTD3	3.56858	4.70367	5.20267	6.40527	5.15328	5.46642	4.77487	5.7384	4.22038	5.87878	1.7056	4.39715	4.59838	5.62014	4.37899	6.13382	5.09541	6.33498	4.47015	4.86943	4.91844	5.76149	5.27012	5.4327	4.9699	6.19443	4.67037	5.36899	3.75006	5.54619	4.34059	6.11347	3.98899	5.48668	4.83818	5.77195	3.95635	5.41941	4.42054	5.34387	5.13287	5.37579	4.79796	4.23793	4.52933	5.96084	4.84036	5.38935
ENSG00000066735.15_KIF26A	5.86167	6.8555	6.49518	4.18295	9.19499	7.70681	7.14887	6.25531	6.90493	5.3219	4.65153	5.70454	7.23314	4.29756	5.51682	4.8302	6.5305	6.35441	5.31867	5.50287	7.21741	4.26654	7.4447	7.80569	6.72068	7.37215	7.55051	5.75709	5.94067	5.17397	4.85278	4.99134	6.22351	7.69384	6.34465	4.12759	4.9081	3.66835	7.92594	6.82366	6.53604	5.43549	3.7895	5.2021	5.33875	6.94866	5.5494	6.03958
ENSG00000066739.12_ATG2B	8.5616	8.26124	7.98167	6.41158	7.77555	8.56193	7.99862	7.7573	8.12629	7.77732	7.23672	7.14103	7.60627	8.38744	8.62119	8.0772	8.37246	7.97036	8.38397	8.19847	7.95783	8.5263	8.46946	8.15159	8.14768	8.77756	8.27593	7.62162	8.52477	8.1845	8.70736	9.3966	8.32164	8.12396	8.24695	9.07108	8.11804	8.24604	8.62194	8.25192	8.49727	8.27445	8.33898	8.37597	8.69267	7.52167	8.52725	7.82561
ENSG00000066777.9_ARFGEF1	9.92353	9.84959	9.87014	9.19684	9.22612	9.77056	9.60489	9.5592	9.97737	9.65647	8.95356	8.78393	9.58549	9.82288	9.88776	10.0892	9.47769	9.15779	9.87317	9.69182	9.69684	9.82108	9.43212	9.19513	9.65559	9.06508	9.67846	9.16155	9.85783	9.31941	9.93815	9.03925	9.67579	9.21785	9.78996	10.5066	10.0997	9.30293	10.0608	9.0063	9.7822	9.7871	10.2901	9.78618	9.74388	9.07997	9.30579	9.29254
ENSG00000066827.16_ZFAT	5.87323	5.79169	5.5933	5.9785	5.19123	6.54133	5.70284	6.63994	6.38276	5.99131	5.12664	6.06653	5.18139	6.13742	5.98433	6.75437	6.31442	6.13724	5.96633	6.1504	6.167	5.5968	6.26783	5.9626	5.83152	6.71773	5.93652	5.49176	5.80073	6.34657	6.40834	6.77981	6.2557	5.85154	6.05883	7.74146	6.06795	5.70806	6.51834	5.19857	6.16283	5.81314	6.11544	5.72496	6.83968	5.867	6.55207	5.8772
ENSG00000066855.16_MTFR1	6.44734	7.36222	6.98453	7.355	6.0784	7.02001	7.27024	7.25855	6.39818	7.17152	7.46481	7.46992	7.44357	7.14663	6.31065	8.06156	6.58037	7.64683	6.56696	6.79269	6.9262	7.06697	6.42031	7.0646	6.78681	6.86657	6.84507	7.51716	7.17343	7.02267	6.11966	7.48579	6.79673	7.47959	6.58475	7.81548	6.58212	6.34729	6.81403	6.40067	6.1418	6.80039	7.55022	6.46111	6.76284	6.97761	6.59981	7.11114
ENSG00000066926.13_FECH	6.80193	5.85416	7.06792	4.021	5.13756	5.15756	6.4839	5.73084	5.57276	5.30166	5.92594	5.6302	7.03727	5.93073	6.40144	5.08378	7.36482	6.45138	5.66996	7.36842	6.06339	5.95972	6.91375	6.80715	7.10427	7.74085	6.61934	5.8621	6.89639	7.14916	7.0111	6.06179	7.22954	6.78882	7.09526	4.46469	6.93259	6.56291	6.1403	5.30403	6.54081	6.18637	5.33041	6.85309	6.72654	7.11743	6.45359	5.88637
ENSG00000066933.16_MYO9A	8.7855	8.05218	8.58327	8.3108	8.17549	8.06704	7.95422	8.11943	8.98559	7.97388	9.26303	7.98428	8.2075	8.13038	8.8401	8.5611	8.63583	8.35752	9.1017	8.45694	8.37255	7.88866	9.27836	8.3142	8.63588	9.59351	8.80581	8.10198	8.93373	7.86421	9.09371	7.77458	8.6455	8.46614	8.6983	8.9576	9.12115	8.41354	8.82879	7.03512	8.77708	8.61269	8.46873	8.60289	8.79856	7.81064	8.41407	7.68057
ENSG00000067048.17_DDX3Y	7.35211	7.82236	1.7056	1.7056	4.9307	6.99482	7.76925	6.06051	7.31295	8.39985	6.9651	6.55658	7.3054	7.16053	7.19581	6.33652	1.7056	1.7056	6.83779	7.19196	7.2152	5.15908	1.7056	1.7056	7.59283	9.26437	7.60002	9.02942	1.7056	1.7056	1.7056	1.7056	1.7056	1.7056	7.14339	5.25325	6.92653	7.46661	7.68399	6.88448	7.54094	7.8184	6.71853	7.29956	7.70483	7.08993	7.68247	7.73609
ENSG00000067057.18_PFKP	9.10212	8.8238	8.82933	10.004	10.8631	9.5559	8.65199	10.1923	9.80379	8.85087	9.76538	10.421	8.66625	8.69669	9.85776	8.73534	8.89961	10.1565	9.03745	8.46039	9.32737	8.47058	8.89714	9.07212	8.88893	8.99538	8.81536	9.66556	9.67425	9.93517	9.18032	9.06844	8.7901	9.38547	8.72209	8.88256	9.71807	8.93353	9.25125	8.29225	8.71553	8.98918	8.74719	9.46129	9.17963	9.24603	8.72014	8.95542
ENSG00000067064.12_IDI1	8.2474	7.60845	7.85388	5.6652	7.72332	6.98648	7.72135	7.05416	8.07468	7.28325	7.2058	6.55516	7.19262	7.00129	8.63415	6.67516	8.20517	6.7768	7.27816	7.24476	8.81447	7.34779	7.04181	6.80193	7.75692	6.59725	7.95354	7.82184	7.85479	6.91048	7.7366	7.16379	7.69381	7.45238	7.86042	5.58796	8.90671	7.47881	7.96062	6.35599	7.51344	7.40424	7.26726	7.07458	7.95776	7.03118	7.67903	7.97299
ENSG00000067066.17_SP100	8.30474	8.03797	8.85072	6.41769	5.97672	8.25206	7.48673	7.50478	9.40468	8.02117	7.75264	6.43995	7.4633	8.75581	9.30941	8.2311	9.00719	9.39874	8.98132	9.1694	9.09646	7.49809	8.76147	8.74198	9.0141	8.5869	8.66099	7.88873	8.69257	8.47462	8.76504	7.88359	9.50019	8.81719	8.54805	8.69388	9.77568	9.14899	8.58596	6.7554	8.72832	7.93163	8.44218	8.84789	9.10548	9.28263	9.61341	7.54881
ENSG00000067082.15_KLF6	10.4234	10.6615	11.0209	10.1229	11.5496	10.3797	10.3939	10.7363	12.4819	10.3584	11.3352	10.4011	10.1471	10.3005	11.7194	10.0158	11.3007	10.8385	10.7793	10.8281	10.7565	9.98651	10.7092	9.79556	11.5213	10.1483	10.3598	9.17851	11.8387	10.5447	11.526	9.79492	11.1926	9.88724	10.5871	10.7104	11.8697	10.6349	11.3489	9.42485	10.7041	9.92632	10.7871	11.4764	10.8061	10.3147	11.6478	9.56474
ENSG00000067113.17_PLPP1	7.80862	7.72909	8.87008	5.45787	9.83769	6.31898	7.42291	6.23198	9.27315	5.91598	9.64118	7.98794	7.64261	6.75991	9.62863	5.87363	8.4529	5.26876	8.39114	7.83881	8.23266	6.42044	8.69397	6.11704	8.20483	9.31755	8.22409	5.63116	9.46199	6.97843	9.3918	5.90868	8.23924	6.39736	8.65972	4.88696	9.27571	7.61282	7.60986	6.06573	8.05218	6.56885	7.93363	8.74318	7.93451	5.71094	7.23109	6.15691
ENSG00000067141.17_NEO1	10.6265	9.80709	10.8765	9.04667	9.84346	9.11743	10.7586	9.47294	10.2661	8.3502	10.0297	8.39383	9.63258	8.77556	10.4681	4.2796	9.41949	8.70573	10.0315	9.36927	10.0738	9.3717	10.0277	9.34527	10.2086	9.46007	9.97891	9.1225	10.0804	8.59062	10.3691	9.0967	9.94572	9.66667	9.58298	8.93553	9.67493	10.1038	10.1133	9.10875	9.93425	7.80775	9.44021	9.47457	10.2119	8.89311	9.13752	6.36304
ENSG00000067167.8_TRAM1	8.61948	9.03447	9.45949	6.59221	5.98235	8.14982	8.17919	7.47678	8.87987	9.47441	6.41047	5.75255	8.75717	9.18878	9.27498	9.38981	9.52718	10.0529	8.42997	8.93671	9.0504	9.49676	9.22824	9.02114	8.85583	9.00678	8.64307	8.60548	9.27166	9.98398	9.17646	9.52616	8.94271	9.43125	9.30412	9.3426	9.49092	8.9116	8.34496	6.7883	9.10516	8.84272	10.1192	8.9576	8.99168	9.67692	8.40239	8.64624
ENSG00000067177.15_PHKA1	5.46274	4.9881	5.56633	6.59829	5.54399	5.45255	6.10939	6.71132	5.39109	6.865	3.76622	6.92097	5.90556	6.77634	5.27026	7.79299	5.6166	7.168	5.3244	5.58396	5.54162	7.44202	6.19916	7.10272	5.89314	6.82996	5.44464	6.70413	4.14986	6.54847	4.9402	7.55337	5.00477	7.18683	5.48846	7.17377	4.82768	6.2086	5.19395	5.70523	5.73795	7.18779	6.71477	5.55262	5.90508	7.07048	4.50791	6.35534
ENSG00000067182.8_TNFRSF1A	9.29859	9.31033	9.53613	8.80977	10.3785	9.74055	9.0762	9.43709	10.5971	8.79978	10.4973	9.15242	9.3391	9.07966	10.1813	7.4337	9.65537	8.99137	9.80839	9.12046	9.36005	8.72564	9.51511	8.81703	9.12661	9.4829	8.94184	8.54385	10.3933	9.3908	10.0818	8.99328	9.63625	9.07969	9.26808	8.47426	10.4066	9.65808	9.43722	8.63674	9.11957	8.18449	9.51228	10.2368	9.19433	8.97578	9.47141	8.81179
ENSG00000067191.16_CACNB1	6.77895	6.19974	6.07821	6.26087	6.18333	6.69299	5.77898	6.67434	6.44278	5.58889	6.8433	5.51963	5.15436	5.90455	6.63697	5.92396	6.55201	6.46584	6.85862	6.2714	6.15973	5.48834	6.1678	5.72053	5.48242	6.58214	6.34333	5.25662	7.59704	5.51833	6.80511	6.25894	6.91156	5.43898	6.43612	6.28661	7.02627	5.43564	6.1009	5.55002	6.33047	5.45896	6.25731	6.80568	6.62497	4.67877	7.51727	5.55271
ENSG00000067208.15_EVI5	7.98514	7.75232	8.09224	6.99352	8.61461	7.84921	7.90423	7.54834	8.23224	8.00463	7.38824	8.18332	7.60918	7.95303	8.065	7.21636	8.00069	8.41177	7.90683	8.04022	8.10807	7.61695	8.10076	7.90247	7.61163	8.3586	7.88098	7.41669	7.98327	7.96722	7.6525	7.81178	7.75906	8.08471	7.91842	7.52542	8.08903	7.67177	8.15347	7.15223	7.90345	7.99728	7.80873	7.28148	7.89273	7.55662	7.44414	7.86618
ENSG00000067221.14_STOML1	4.99425	5.93796	5.32156	7.27513	6.47516	5.77366	5.48132	5.51918	5.49659	5.198	5.16018	6.02986	5.88881	5.42299	5.63924	6.02743	6.00667	5.52771	6.31371	4.30986	5.50967	4.83068	5.3705	5.43551	5.27913	6.48263	5.03869	4.897	5.65801	5.46519	5.16001	5.38155	5.35491	5.13295	4.78637	5.15402	5.26918	5.3104	4.89614	6.60204	5.80473	5.74308	5.19401	6.17738	5.27317	6.04598	4.3622	5.24214
ENSG00000067225.19_PKM	11.1373	10.5808	11.0746	11.1745	10.2356	11.2992	11.029	11.581	10.1907	11.739	10.3739	11.6204	11.4599	11.0217	10.3552	11.5373	10.6525	12.6364	10.6387	10.2301	11.3469	11.3879	10.351	11.0372	10.6531	10.524	10.7951	11.6464	9.98666	11.7905	10.3805	11.5049	10.5156	11.4054	10.7943	10.934	11.1618	11.627	10.5705	10.0853	10.4812	11.6156	11.1423	10.7337	10.8422	12.4748	10.1296	11.113
ENSG00000067248.10_DHX29	7.33435	7.14604	7.63414	6.22965	4.23235	6.66002	7.46875	6.40485	7.17832	7.63347	6.80082	5.87983	7.63552	7.17331	7.20521	7.35376	7.38524	7.48094	7.13698	7.50879	7.6812	7.27385	7.57014	7.12398	7.48564	8.07123	7.41853	7.20171	7.40007	7.68322	7.21145	7.4283	7.58402	7.34036	7.44169	5.95361	7.69399	7.60359	7.31579	6.58835	7.31492	7.55939	7.12361	6.73085	7.45271	7.60348	6.70467	7.41195
ENSG00000067334.14_DNTTIP2	6.3988	7.10912	7.10481	6.50708	4.23501	6.68672	7.00575	6.25097	6.60535	7.41524	6.0429	5.98097	7.49239	7.00936	6.41951	6.47199	6.85819	7.49924	6.54062	6.55029	6.92167	6.97054	7.10923	7.1539	6.8199	7.69624	6.90006	7.05898	6.67447	7.07959	6.89314	7.10636	6.46199	7.53203	6.93771	5.88654	6.78028	7.04622	6.47228	6.09057	6.59146	7.26909	6.71136	6.65614	6.283	7.2481	6.28074	7.1643
ENSG00000067365.15_METTL22	6.48378	7.22689	5.89656	7.49859	6.66754	7.24882	6.18662	7.46352	7.12929	5.86153	6.76147	8.19964	6.45701	6.55148	6.43343	6.96347	5.62699	6.9958	7.10606	5.78152	5.78044	7.00632	6.02394	6.19967	5.86719	7.01819	5.81957	6.99445	5.66329	5.56476	6.26606	7.38668	7.07265	6.1988	5.72343	7.40358	6.18919	6.2365	6.96481	7.4042	6.57454	6.53227	7.18489	6.51894	6.02916	5.78577	7.37056	6.75995
ENSG00000067369.14_TP53BP1	8.36588	8.46144	8.09511	8.61837	7.20347	8.55627	8.26103	7.64087	8.37342	8.75342	7.38163	7.83691	8.29898	8.75475	7.90311	9.12143	7.93015	8.48106	8.05836	8.39068	7.91129	8.95662	8.76281	8.19703	8.4265	9.47856	8.23076	9.1931	7.77506	8.51033	7.96586	9.43958	8.12499	7.66901	8.30223	9.44438	7.83967	8.7205	8.80034	8.23171	8.42416	9.59123	8.67216	8.11445	8.36916	8.34604	8.10329	8.75287
ENSG00000067533.6_RRP15	5.52472	6.30881	6.35897	5.47833	4.66807	5.30536	6.01343	5.01755	4.88941	7.25453	1.7056	5.72424	6.62888	6.26866	5.27056	6.85782	5.78633	5.73653	4.67174	5.04696	5.73658	7.35674	6.09951	7.07796	6.40871	7.23027	5.8854	5.90186	4.37866	5.4324	5.16218	5.25294	4.62492	7.56324	5.95333	6.71066	4.93134	6.22047	5.74796	6.68789	5.96232	6.37342	6.81949	5.38597	5.82454	6.14018	4.96196	6.76855
ENSG00000067560.14_RHOA	10.8286	11.0422	11.5184	10.7088	10.6015	10.7132	11.4816	10.8448	10.88	11.0533	11.237	10.7349	11.2988	10.8062	11.3703	9.70596	11.3159	11.0837	11.1014	11.2581	11.4453	10.1556	11.0331	10.787	11.2136	11.2646	11.2551	10.9731	11.2734	11.2517	11.3413	10.7329	11.0737	11.0473	11.425	9.80608	11.7268	10.7893	10.7549	10.4684	11.0217	10.7228	10.9851	11.1527	11.0852	11.2076	10.8306	10.8216
ENSG00000067596.12_DHX8	8.22095	8.29205	8.19877	8.74688	7.18225	8.01636	7.81225	8.06669	8.41699	8.17259	8.08234	8.20052	8.36503	8.26659	8.2245	8.61112	7.96655	8.32973	8.19643	7.65377	8.13291	8.28071	8.03948	8.03302	8.36654	8.20808	8.14842	8.39377	8.3963	8.08157	8.14857	8.1327	8.27113	8.37905	7.897	8.35869	8.46231	7.92822	8.26717	8.58634	8.08514	8.16169	8.43242	8.12019	8.18475	8.42075	8.16635	8.71764
ENSG00000067601.8_PMS2P4	3.17075	3.78133	3.44985	2.7606	1.7056	4.06177	3.05497	3.21497	4.08549	3.55331	1.7056	1.7056	4.42245	4.69446	4.31091	3.73966	3.89439	3.84694	4.00028	3.20733	3.58735	4.40148	3.56752	3.99377	3.16527	3.65478	4.40872	4.20798	4.36696	4.27957	4.24166	4.58003	4.32553	3.93343	3.54628	4.0823	3.79271	3.90121	4.83618	4.20043	4.54399	4.4505	4.23447	4.19605	4.6556	3.53614	4.39575	4.22498
ENSG00000067606.17_PRKCZ	7.69978	8.10019	7.62835	8.53824	8.48878	7.92078	7.53356	7.79947	8.85125	7.06178	8.34554	7.94771	7.40184	7.75477	8.46624	6.64867	7.82474	7.73108	8.24171	8.24116	7.8502	7.03143	7.47601	7.25784	7.82116	5.24377	7.83655	7.80157	8.40349	7.56328	8.61636	7.36958	8.26359	7.11862	7.90085	8.28168	8.46129	7.4898	7.89713	8.16966	8.08769	7.33589	7.61942	8.36601	7.77136	7.22538	9.16999	7.53936
ENSG00000067646.12_ZFY	6.51983	6.53009	1.7056	1.7056	4.48766	5.91523	6.19623	4.42571	6.14121	6.64568	5.03181	5.65113	6.3364	6.28327	6.19861	4.5182	1.7056	1.7056	6.30422	6.41191	6.34073	3.1666	1.7056	1.7056	6.50546	7.4665	6.99164	7.32809	1.7056	1.7056	1.7056	1.7056	1.7056	1.7056	6.66417	3.9619	6.66159	6.56177	6.27319	5.54048	6.87818	6.68211	5.92879	6.43021	6.35547	6.61459	6.35466	6.33659
ENSG00000067704.10_IARS2	9.10857	9.13856	9.69973	8.38138	7.49174	8.39434	9.56999	8.07772	7.67208	8.71804	8.38915	7.2334	9.69822	8.88398	8.35276	9.50442	8.25765	9.85604	8.51652	8.09807	9.29981	9.14719	8.76928	9.78467	8.60175	8.98383	7.92476	8.40651	9.03043	8.75218	8.77983	8.81597	7.85715	10.1888	9.09386	7.88676	9.38208	9.49038	8.12778	8.75468	8.45055	9.15825	8.53824	8.64588	8.76844	9.5587	7.57017	9.3504
ENSG00000067715.14_SYT1	3.88978	3.0074	3.48851	3.57676	1.7056	3.97245	4.53085	3.88741	4.73479	4.96117	5.91955	1.7056	4.39453	5.4114	4.54818	3.68937	3.36141	1.7056	3.47626	3.53937	3.96034	3.02097	6.91896	4.59872	4.05127	8.40611	4.8215	3.54352	3.74735	4.3452	3.31318	1.7056	2.85717	4.42406	5.02966	4.78667	3.45124	5.59346	4.08977	6.00084	3.54676	3.92312	3.92493	3.81695	4.29569	2.4227	3.37124	4.61334
ENSG00000067798.16_NAV3	4.52613	4.39338	3.11347	1.7056	1.7056	5.40552	4.11586	3.84273	4.88801	5.09686	2.9726	1.7056	5.15205	3.59686	5.18907	3.41473	5.40571	3.29467	3.8408	5.07398	4.20635	3.24618	6.09696	4.06675	3.82397	6.2809	4.36522	3.15325	4.36757	3.74347	3.60254	3.79504	5.07751	3.1589	6.03993	4.95519	3.79763	4.18217	5.06348	2.69662	5.14106	3.64287	4.24402	4.5079	3.15181	2.92622	4.98579	2.94564
ENSG00000067829.19_IDH3G	8.02878	7.95164	8.0152	7.15499	6.02582	7.22915	7.11607	7.70186	7.48868	7.80029	6.10743	7.16858	7.83078	7.77103	8.0344	6.88089	7.9686	7.00961	7.64889	7.97004	7.96379	8.06399	7.1493	7.86605	7.91275	7.14717	8.1123	7.09258	7.84832	7.97636	8.30887	7.75891	8.06639	8.26114	8.27056	7.37324	8.42387	7.68979	7.81425	7.57884	7.8614	7.37746	8.14979	7.56864	7.68587	7.20498	7.91233	7.67871
ENSG00000067836.13_ROGDI	6.56477	6.59589	5.98184	5.57963	7.53398	5.50095	6.14557	6.28256	6.70095	6.06183	7.22606	6.17333	5.90727	5.46239	5.75974	5.57695	5.74795	4.70348	6.45382	6.74931	5.62555	5.86934	6.18353	5.11869	6.06888	7.1814	6.06592	5.83408	6.37937	6.02164	6.41316	5.48982	6.59584	4.67842	5.48728	6.2311	5.9439	5.98048	6.32188	6.42129	6.29812	6.09089	6.19837	6.36735	5.8356	4.73014	6.43084	5.69962
ENSG00000067900.8_ROCK1	8.83001	8.45703	8.75048	8.44863	10.0184	9.33473	8.80689	8.52224	8.76466	8.53446	9.32255	9.03356	8.71036	8.72612	8.68847	9.08377	9.30791	8.87698	9.07436	9.10049	8.61289	8.64681	9.11192	8.74246	8.49469	9.82801	9.03053	8.97813	8.69819	9.05331	8.71337	8.9945	9.09771	8.7559	8.87869	8.22179	8.97444	8.97316	8.81045	7.43372	9.00955	8.61319	8.93605	8.82279	9.04983	8.69287	9.09635	8.21497
ENSG00000067955.15_CBFB	6.73102	7.59137	6.33551	7.96924	5.74017	7.53106	6.22702	8.02485	7.98584	8.03295	6.19773	8.55952	7.18369	7.8283	6.80842	8.22014	7.29921	8.13836	6.99216	6.33473	7.25388	8.32214	6.43013	7.42972	6.86233	6.46848	6.96983	8.44151	6.91297	7.55173	7.41091	7.81082	6.98312	7.68124	7.1621	8.41123	6.93318	7.9908	7.35361	7.97255	6.70851	7.66167	7.81225	6.67879	7.28321	7.73993	7.54391	8.16753
ENSG00000067992.16_PDK3	9.11242	8.24589	8.86438	8.27969	7.43256	7.66162	7.86106	7.02433	7.80392	8.89667	7.0931	8.45112	8.20583	8.7064	8.53078	9.04027	8.18986	8.54491	8.19867	8.16367	7.93337	9.1559	9.05723	9.48258	8.17433	10.1611	9.05977	8.94588	8.53414	8.50022	8.84961	8.01587	8.25809	9.96658	8.76584	9.49373	8.57633	8.03568	7.96785	8.1363	8.64766	9.1895	8.83223	8.22016	8.59113	8.47394	8.75461	9.25997
ENSG00000068001.14_HYAL2	7.20962	7.59007	7.4062	8.33157	6.03707	8.04755	8.75162	7.39608	7.39614	7.02829	7.91604	6.93982	9.15208	7.22403	6.92482	6.75374	8.30761	7.53591	6.31898	6.94376	7.69926	7.63719	7.78053	7.62124	7.22908	8.00306	7.88098	7.3265	5.83664	7.66783	6.32471	8.15638	7.76199	7.82308	7.19086	6.07415	7.13669	6.87065	7.18113	7.62523	6.92967	7.58703	7.24937	6.94102	7.06895	7.41277	5.82479	7.83436
ENSG00000068024.17_HDAC4	7.90236	8.23903	7.35344	9.39152	9.00412	9.1195	8.396	9.27116	7.90464	7.78647	7.55554	8.46993	8.25003	8.25389	7.68398	10.6258	7.78493	9.30959	7.55944	8.09499	7.74696	7.53874	9.15425	7.78869	7.60116	10.8814	7.75754	8.24668	7.1573	8.1097	7.54916	9.05569	8.40811	7.60284	8.05917	8.63362	7.53403	8.31486	8.47997	7.94292	7.94075	8.20257	8.00455	7.657	8.23606	7.86527	8.44623	7.72666
ENSG00000068028.18_RASSF1	5.74013	6.32792	5.73999	7.14179	5.4973	7.05085	6.45084	6.85545	5.92027	6.043	6.29938	7.55833	6.87176	6.79687	5.8933	5.49886	6.5102	6.62194	5.27597	6.1508	6.24165	6.60667	6.13944	6.57191	5.76322	6.57013	6.42988	6.38501	5.98418	7.0101	5.32117	7.3355	6.30623	6.79402	6.1634	6.60287	5.92163	5.90098	6.31446	6.5378	6.22176	6.52108	5.56672	5.8488	6.19063	6.27087	7.09943	6.32892
ENSG00000068078.20_FGFR3	8.62587	8.40585	7.99609	7.87822	10.5422	9.79162	8.598	9.119	9.68139	7.27631	10.4231	10.4467	8.65096	8.24754	9.07109	6.26999	9.16129	7.80465	10.0413	9.80541	8.31787	8.16869	8.63656	8.22245	8.60914	4.44652	9.05125	8.97952	9.38586	7.46166	9.8709	7.99924	9.81633	8.08685	8.70802	8.50427	9.43694	7.93468	9.01164	8.28516	9.21048	7.76945	8.59747	9.4951	8.73714	5.76318	10.5171	7.32518
ENSG00000068079.8_IFI35	7.34719	7.75096	7.8175	6.81999	8.0569	6.75575	7.27102	8.08582	8.1875	6.68586	9.21722	8.09485	7.77482	7.58026	7.89025	6.51015	7.58694	8.22216	8.44163	8.06028	8.96272	6.59311	7.30558	7.51732	8.03911	6.70226	6.5098	6.41204	7.34822	7.38163	7.52698	5.61716	8.59643	7.19254	7.75638	5.80806	9.87986	8.51384	6.49288	7.2313	8.20301	6.45964	7.61998	8.97428	7.85353	8.40468	7.78051	7.16744
ENSG00000068097.15_HEATR6	6.51957	6.2735	6.3528	7.54356	5.13284	7.1906	6.45333	7.22787	5.69858	6.34329	5.68126	4.56331	6.52869	6.87237	5.1394	8.03887	6.3815	6.86129	6.44348	6.36271	5.88119	5.9607	6.49138	6.7167	6.28964	7.75417	6.41002	6.85881	5.81474	6.51373	6.15536	7.59182	6.65534	6.55911	6.16741	8.83891	5.9773	6.37968	6.48389	6.56961	6.35315	7.043	6.22464	5.66635	6.04663	7.09625	7.15699	7.08298
ENSG00000068120.15_COASY	8.30777	8.61976	8.69972	9.19803	8.16498	8.29186	8.23286	8.33184	7.81397	8.2557	8.28378	8.56236	8.66058	8.1168	8.28784	8.6173	7.74258	8.26834	8.40679	8.16579	8.73018	8.62334	7.65123	8.17544	8.23508	7.18776	8.25244	8.25049	8.1969	8.27607	8.5951	8.33173	7.89155	8.29029	8.51439	8.77166	8.73361	7.68714	7.96395	8.32817	8.27802	8.00173	8.85457	8.57633	8.10729	8.03591	7.88605	8.74586
ENSG00000068137.15_PLEKHH3	5.70107	6.34988	4.7089	7.53822	7.01761	7.65394	6.34562	8.01065	6.27435	6.42859	5.54801	8.56044	5.71374	6.79453	6.0257	5.9572	5.23872	6.77901	5.76395	6.2797	6.25247	6.94184	6.28334	6.11587	5.83525	7.54363	5.20379	7.01442	5.73175	5.95868	4.93511	7.03122	5.86052	6.20544	5.29174	6.45536	5.39474	5.32705	6.35529	6.71219	6.25523	6.48284	5.72633	6.10021	5.09362	6.24599	5.61147	6.16132
ENSG00000068305.17_MEF2A	7.85933	7.57525	7.85508	6.96057	5.76759	7.31425	7.39738	6.56472	8.37119	7.32351	6.98738	5.96352	7.7885	7.584	8.03132	7.18808	8.15717	7.50196	7.53401	8.28552	7.98847	7.55654	8.6174	7.46289	8.10681	9.28029	8.02066	6.91551	8.00305	7.82289	8.17438	7.62491	8.2669	7.42029	8.17326	7.48186	8.69344	8.30808	8.39225	6.42337	8.16445	7.65524	7.91832	7.7347	8.19513	7.77172	8.38604	6.91267
ENSG00000068308.14_OTUD5	8.14573	8.14516	7.99822	9.07315	9.04014	8.74516	7.85614	8.94403	8.73272	8.15063	9.09393	8.86161	7.66431	8.48142	8.15072	8.26008	8.20672	8.11663	8.51134	8.30413	8.16475	8.416	8.19592	8.59964	8.1408	8.58807	7.94275	8.22072	8.31925	8.21625	8.3595	8.37156	8.25982	8.77629	8.04079	9.27051	8.28933	8.07383	8.35303	9.4424	8.21995	8.01864	8.36617	8.40405	8.25066	7.42385	8.61806	8.39773
ENSG00000068323.17_TFE3	7.50538	7.24752	7.283	7.87656	7.32783	8.44019	7.49914	8.33153	8.1895	7.76158	7.60209	7.69299	7.56515	7.35316	7.54148	7.34756	8.09991	7.62702	7.68055	7.79182	7.55095	8.28299	7.67923	8.03621	7.55493	8.36515	7.32608	7.11086	7.6981	7.92547	8.03303	7.94243	7.60509	7.82435	7.51391	7.65431	8.01574	7.67717	7.7466	8.0009	7.47298	7.40287	7.74001	8.01429	7.47721	7.69336	7.96928	7.72831
ENSG00000068354.16_TBC1D25	6.51288	6.21855	5.90407	7.05414	6.5911	6.76955	6.25906	6.93556	7.05055	6.0026	7.04129	6.55325	6.00919	6.66259	6.54414	7.09466	6.48464	6.22164	6.8642	6.44377	5.92506	6.89474	6.58403	7.21324	6.20339	7.17025	6.19263	6.46208	6.92331	6.28242	6.78721	6.50636	6.72107	7.02227	6.03476	7.28563	6.31348	6.13512	6.63947	7.33653	6.70746	6.12322	6.5952	6.42274	6.66652	6.36827	6.57804	6.36375
ENSG00000068366.21_ACSL4	6.13629	6.45574	6.44945	7.22835	3.6497	6.87175	6.32195	7.44984	5.50896	8.33432	5.07424	6.16848	6.94535	7.53966	6.11432	7.16777	7.5336	7.81332	5.38302	7.42439	6.47896	8.49745	7.50186	8.44354	6.77342	8.63011	7.29842	7.39768	6.28111	9.3881	6.22453	8.13972	7.1172	8.58513	6.94158	8.31407	6.43603	8.11984	6.64697	7.17368	7.16054	7.87288	7.9423	6.27147	7.5291	8.14747	6.99194	7.92196
ENSG00000068383.19_INPP5A	7.56301	7.43501	7.75863	7.55862	9.03305	8.5904	7.7361	7.7779	7.9942	7.5516	8.38978	9.16215	7.78286	7.32299	7.91514	6.75859	7.84164	7.06495	8.38195	8.05292	7.81681	7.42259	8.24057	6.9529	7.76062	9.54644	8.11374	6.91718	8.391	7.26985	8.40487	7.23429	8.19197	7.08958	7.96246	7.10301	8.52752	7.13519	7.6984	7.5462	7.65681	7.19446	7.65036	8.03212	7.362	6.73897	8.61357	7.40841
ENSG00000068394.11_GPKOW	6.23644	6.38499	6.62344	7.45244	7.20171	6.67052	6.19081	6.88631	6.70148	6.75444	7.50073	7.48586	6.53819	6.44868	6.68532	6.19178	6.14861	6.7177	6.62823	6.53384	6.31257	6.24327	6.20987	6.8566	6.36229	6.76347	6.46541	6.22127	6.70271	6.19292	6.14472	6.05824	6.65057	6.96503	6.60626	6.55792	6.56152	6.53924	5.98124	7.6251	6.01245	5.77084	6.69011	6.622	6.22983	6.57519	5.98217	6.54739
ENSG00000068400.13_GRIPAP1	6.9336	6.99877	6.53038	8.32986	6.90477	8.13242	6.16982	8.67442	7.66555	7.14896	6.66236	7.79095	6.27163	8.16131	7.37933	7.67547	7.03586	6.92328	7.24757	7.50379	6.49932	7.75525	6.8799	7.77536	6.68436	6.52722	7.2075	6.94816	7.19901	7.27947	7.27305	7.48547	7.83517	7.49601	6.73278	8.34252	6.91965	7.48086	7.47053	7.92667	7.24816	7.14277	7.84089	7.24303	7.25878	6.98337	8.2914	6.72132
ENSG00000068438.15_FTSJ1	6.11794	6.21713	6.23901	7.7293	5.26277	6.53894	6.19137	7.36821	6.01854	7.07908	5.21686	7.0339	6.88869	6.81536	5.51412	6.83621	6.11878	7.22497	5.89329	6.27073	6.87052	6.9719	6.19153	7.63392	6.36108	6.20009	6.19143	6.66618	5.90093	6.73385	6.24582	6.93501	5.87861	7.7512	6.12881	6.89561	6.12678	6.25901	6.3691	7.24665	6.33768	6.60206	6.69926	6.14419	6.06294	6.89108	6.17827	6.88057
ENSG00000068489.13_PRR11	7.02494	7.01665	6.86644	8.48418	7.35256	6.27535	6.71069	7.21228	4.3441	7.96161	6.15846	7.86566	7.49252	7.12129	5.91506	8.24432	6.3343	7.38639	5.75704	5.67219	7.59163	7.95981	6.00602	6.95633	6.85198	4.25026	7.52949	7.88354	4.41299	7.60885	5.24549	7.21232	5.52881	7.71425	6.18704	7.35659	5.80895	6.19153	6.76417	7.99524	5.42582	7.65294	6.9929	5.88874	6.52317	7.3011	6.04491	8.15109
ENSG00000068615.19_REEP1	3.50584	4.22734	3.97557	4.61693	3.45173	4.69957	3.96137	4.07094	4.18878	3.87016	5.33629	1.7056	3.9963	5.18144	3.76553	3.10528	2.5345	2.30554	3.70359	3.48662	4.05735	4.806	6.80082	5.18035	3.73715	9.43262	4.72144	2.99821	4.06712	2.84219	3.41643	2.40744	4.95637	5.0657	4.17333	6.29964	3.50258	2.73838	3.85864	5.90979	3.99328	3.69707	2.43853	3.06829	3.58159	2.23119	1.7056	5.10669
ENSG00000068650.19_ATP11A	7.39471	9.08715	6.47179	11.5316	6.84278	10.3945	7.73786	9.21838	7.01002	9.85212	7.68996	9.16377	8.02249	9.8105	6.83835	10.5815	7.79684	9.87056	7.03505	7.39223	7.37364	10.5094	7.95344	10.095	7.1725	8.1048	7.74168	9.11552	6.53274	9.42772	6.95537	9.99963	7.37243	10.0652	7.59033	11.4495	7.60111	10.0861	7.72368	10.1105	7.82146	8.95002	10.1703	8.78834	7.58474	9.82438	7.54454	9.96371
ENSG00000068654.17_POLR1A	8.43058	8.78242	8.61613	9.82182	7.70145	8.87097	8.81931	8.93514	8.36211	9.34955	7.11572	8.31251	9.44508	9.40464	7.62042	9.67137	7.99284	9.23653	8.08424	7.97959	8.46791	9.17161	8.4233	9.17943	8.73118	8.67195	8.49518	9.53562	7.47139	9.07462	7.8807	9.21745	8.19136	9.34809	8.27738	9.87582	7.95501	9.12798	8.74497	9.00361	8.45294	9.43462	8.777	8.01396	8.35605	9.26809	8.40785	9.61786
ENSG00000068697.7_LAPTM4A	8.51161	8.2507	9.51017	5.8991	4.22697	6.62012	8.26346	7.01384	9.06743	8.99619	5.22383	5.19237	8.60678	8.49736	9.15205	7.90511	8.99685	9.27004	8.06317	8.61595	9.15229	8.37757	9.34832	8.57238	8.68194	10.019	8.41565	7.88182	9.26731	8.77598	9.05778	8.45396	8.48311	9.01711	9.21546	6.96438	9.635	8.82456	8.32681	6.65407	8.56658	8.90771	8.9229	8.40071	8.68946	9.04456	8.16414	8.26738
ENSG00000068724.17_TTC7A	8.15889	8.47626	7.99761	8.80654	11.7154	9.49047	8.4219	9.62253	9.2565	7.93973	11.0815	10.2982	8.04937	8.19255	9.12393	8.14396	8.70006	7.77452	9.27547	8.42086	8.65214	7.47076	8.54864	8.02917	8.4122	7.55414	8.29866	7.70507	9.27996	8.62691	8.81101	8.57777	9.19585	7.67729	8.15927	8.91953	9.0114	8.4678	8.06736	8.4511	8.44666	7.24002	8.37671	9.18154	8.38723	7.901	8.95004	7.71451
ENSG00000068745.15_IP6K2	9.26857	8.75572	8.88541	9.12622	9.57149	8.81085	8.79741	8.4031	9.21624	8.08201	9.01149	9.24211	8.23453	8.24065	8.96715	8.25335	8.41089	8.03268	9.40737	8.58404	9.02837	7.94668	8.95528	8.41887	9.05847	7.26456	8.87822	8.5275	9.72551	8.29905	8.83161	9.14355	8.87342	8.41706	8.65082	8.96122	9.03047	8.6163	9.16016	9.06733	8.69167	8.77469	8.694	9.19422	8.80886	8.31127	9.51192	8.66839
ENSG00000068784.13_SRBD1	6.76741	6.51892	6.69582	5.7135	1.7056	6.41554	6.59022	6.24695	6.35178	7.03284	3.92779	5.85289	6.9878	6.8977	6.78642	6.77507	7.14018	7.07431	7.23022	7.367	6.93794	6.44175	6.49523	6.32215	6.70032	6.54633	7.03023	6.5926	6.7934	7.05456	6.88349	7.2209	6.8964	6.47552	6.98804	6.26242	7.04627	7.23602	6.82072	5.84844	7.05051	7.17465	6.78192	7.00881	7.62075	7.69309	7.11214	6.51845
ENSG00000068796.19_KIF2A	7.84771	7.7339	8.65722	7.45368	5.95098	7.3971	7.82201	6.65804	9.44581	9.59495	5.39688	6.44748	8.01754	8.18131	9.03909	8.76119	8.37048	9.03938	7.78075	8.03681	8.24344	8.69953	8.29289	8.77441	8.37323	8.58579	8.0933	8.7566	9.03142	8.77648	8.10738	7.93084	8.26835	8.937	8.21106	7.93493	8.5729	8.22761	8.1222	7.2394	8.07621	9.01366	8.44435	7.81697	8.3518	9.2623	8.4008	8.88096
ENSG00000068831.19_RASGRP2	4.97361	4.47328	5.23346	4.96003	1.7056	8.14997	6.22635	5.9695	5.70017	3.47069	7.13434	6.5754	4.26297	4.97034	5.27102	4.01709	5.98431	4.726	6.2453	5.3685	4.91128	4.51817	6.27613	4.90948	5.08556	7.8625	7.31678	4.05567	5.81931	6.77418	6.07561	4.79126	7.2012	3.79314	5.74118	4.31197	5.9997	5.29945	6.42724	4.77572	6.41147	4.32767	6.06352	5.91791	5.81656	4.91726	8.65717	4.66405
ENSG00000068878.15_PSME4	8.7935	8.71785	8.94268	8.5124	7.54497	8.8497	9.19631	8.90939	9.55421	9.69272	7.48353	7.58933	9.45985	9.26798	8.96431	9.28739	8.88456	9.66832	8.73727	8.88007	9.21361	8.98293	8.77842	9.03837	9.08449	9.24234	8.77465	9.21927	8.80333	9.29515	8.75085	9.14583	8.65429	9.17053	8.72431	9.18779	9.22655	9.4019	9.09607	8.53594	8.69872	9.65999	8.88435	8.56516	8.85432	9.4742	8.58802	9.27592
ENSG00000068885.15_IFT80	6.25965	6.27249	6.07897	5.38506	3.81717	5.92877	6.40381	4.41953	6.11357	6.09105	3.05718	1.7056	5.73187	5.86122	6.32834	6.52362	6.09648	6.48463	5.86299	6.20019	5.99261	6.40612	6.54004	6.60849	6.57804	6.46428	5.95941	5.76272	6.00282	6.2423	6.34986	6.19833	5.53786	6.41283	6.46363	5.82721	5.65094	6.49051	6.60716	5.03022	6.24448	6.92494	6.06261	5.57004	6.80151	6.68183	6.0327	6.50105
ENSG00000068903.20_SIRT2	6.42349	6.59895	6.75181	6.65155	7.88603	7.2337	6.53616	6.92225	6.79061	6.78449	6.02733	7.15687	6.60183	6.91396	7.26086	6.52926	7.56266	6.5651	6.86599	7.18732	6.58439	6.38809	7.08003	6.45157	6.38589	7.47679	6.69503	6.76481	7.3871	6.85735	6.9904	7.12468	7.45122	6.38662	6.74089	7.20776	7.00469	6.84818	6.86775	6.91946	7.15349	6.08545	6.8425	7.16766	7.3237	6.47349	7.93009	6.94454
ENSG00000068912.14_ERLEC1	6.96015	7.05896	7.88741	5.73412	5.92414	6.38126	7.56261	6.82949	6.71558	7.70681	5.61839	5.18124	7.51204	7.89851	7.12452	7.04632	7.83735	8.20745	6.74499	7.13814	7.81486	6.85751	7.44481	7.23577	7.12793	7.71188	6.79509	7.03039	6.88995	7.79815	6.99529	7.82951	7.04007	7.49482	7.40761	5.64127	7.32506	7.55243	6.83026	6.0171	7.40812	7.52453	7.01943	6.73508	7.34382	8.29562	6.18288	7.00274
ENSG00000068971.14_PPP2R5B	6.60751	6.83681	6.45771	7.17483	7.68284	7.32946	6.24646	7.92769	8.33171	6.94585	7.8166	7.79352	6.36663	6.81795	7.10591	6.45495	6.73719	6.76768	7.47213	7.11136	6.69711	6.416	6.97967	5.6464	6.7429	7.51076	6.7623	6.36203	7.6049	7.41005	7.57681	6.99624	7.33297	5.65571	6.80417	6.41849	7.12105	6.50332	7.0017	6.69332	6.80214	7.03689	6.96059	7.41489	7.00703	7.17346	7.62225	6.88399
ENSG00000069011.16_PITX1	5.16302	6.36225	4.85882	8.91106	6.57604	8.65798	4.72829	7.4524	4.55473	7.91105	5.5412	9.515	5.45057	7.4294	4.15048	8.49201	6.2905	7.83864	4.4028	6.16449	5.37457	6.85558	6.15196	7.94887	4.98692	4.25272	4.66926	7.95194	5.15365	7.05345	4.3404	8.07787	5.61045	8.0461	5.93101	8.52933	3.96699	7.04697	5.2663	7.3264	5.35834	7.65749	7.51329	7.25194	5.38619	7.8403	5.80023	7.60789
ENSG00000069020.18_MAST4	8.36539	7.62496	7.72431	7.30547	8.14174	8.07622	7.12441	6.83557	8.08942	7.65399	7.45949	7.54365	7.19479	7.40887	7.90535	8.63829	7.79008	8.00954	7.25076	7.95304	7.14327	7.43583	8.29404	7.67908	8.19478	8.86015	7.71326	7.21077	8.83885	7.532	8.27603	7.92458	7.95656	7.32102	7.81879	8.16494	7.19147	8.1859	7.56568	7.90886	8.14239	8.95992	7.58665	7.82982	8.03849	8.43876	9.09575	7.43309
ENSG00000069122.19_ADGRF5	6.45726	5.09728	4.98063	4.72555	3.60289	5.91033	5.91509	5.8141	6.11954	6.00017	4.80463	4.9928	5.9719	5.84067	6.23274	5.31556	7.67813	5.97975	4.61573	7.39459	5.37285	5.72226	6.72697	5.79124	6.20433	7.70406	7.7004	5.12501	6.00651	7.26255	6.06139	7.78122	5.70215	5.43723	6.93217	4.48236	5.46784	5.86407	6.14384	2.9446	6.95455	4.81166	5.72559	5.74301	6.82319	6.79208	4.86797	5.40008
ENSG00000069188.17_SDK2	4.2443	3.67185	4.54044	4.1732	3.59521	6.71147	4.5467	4.72899	5.37443	5.15893	5.10671	4.02005	4.83818	5.69251	5.02611	4.65073	5.64079	3.45966	4.98627	6.89729	4.71421	4.04745	4.85922	4.04345	4.50254	5.78251	4.62047	3.5161	4.80154	7.74072	4.72252	3.61065	4.69684	3.15944	5.4296	3.29954	4.73603	5.26399	5.20963	4.33603	5.29434	6.22632	6.18827	5.54027	4.93159	4.3652	7.23896	3.84773
ENSG00000069248.12_NUP133	7.71857	7.80871	7.71006	7.6697	6.006	7.30732	8.26419	7.35185	6.94026	8.2609	7.32234	6.84293	8.26535	7.85942	7.10444	8.53602	7.39954	7.88812	7.34401	7.54295	7.75477	8.42554	7.79346	8.87886	7.77884	8.4482	7.72262	8.01905	7.27066	7.69722	7.05805	7.91331	7.2301	9.1076	7.54969	7.69657	7.28213	8.46028	7.44783	8.55294	7.70424	7.90024	7.17808	7.16855	7.6487	8.32471	7.61133	8.41215
ENSG00000069275.13_NUCKS1	9.43351	9.39	10.1797	8.51161	5.26426	8.33676	9.80013	8.03578	8.36726	10.1443	8.00753	8.07671	10.1591	9.23531	9.32779	10.4368	9.77801	9.48613	8.26381	9.67077	9.83858	10.2621	10.5038	10.819	10.0382	11.3769	10.1384	10.1866	8.53902	9.56599	8.97834	9.47183	9.11701	11.2382	10.0057	8.75486	8.87838	10.1245	9.13311	9.58896	9.48906	10.0152	9.49715	8.39089	9.44133	10.4693	9.55863	10.0677
ENSG00000069329.18_VPS35	8.74814	9.06029	9.55367	8.10014	6.85644	8.32998	9.37648	8.29859	8.45436	9.45767	8.17357	8.48352	9.42119	9.00293	9.22676	8.87653	9.19842	9.32976	8.68807	9.37341	9.25617	9.79622	9.02823	9.34391	9.15322	9.63592	9.13229	9.25708	9.06952	9.11708	9.35865	8.76545	9.00323	9.40887	9.37111	8.07999	9.2877	9.21241	8.39572	9.00209	8.88733	9.07746	9.12848	8.95586	8.84689	9.17816	8.89419	9.67444
ENSG00000069345.12_DNAJA2	7.85957	7.861	8.61988	6.6227	6.00361	6.90643	7.74266	6.93274	8.22751	8.67365	7.13964	6.83614	8.08214	7.97123	8.5661	7.69441	8.32422	8.37074	7.81038	8.48718	8.14815	8.58181	8.0474	7.82033	8.30383	8.63405	8.38012	7.83467	8.47497	8.04294	8.68846	7.44035	7.91737	8.22229	8.3904	6.9161	8.70315	8.26705	7.84437	7.63163	8.41763	8.147	8.26348	8.16222	7.9416	8.10288	7.60959	7.95727
ENSG00000069399.15_BCL3	7.61308	7.55661	7.74117	7.803	8.72383	9.10069	7.39368	8.59248	9.16496	8.32778	8.06982	7.64475	7.98256	7.35043	7.69386	6.96153	7.99788	6.50334	8.18627	7.98277	7.91215	7.4423	7.81844	7.13386	8.19895	6.69744	7.36319	6.69804	8.56589	8.8849	7.84569	8.25631	7.80138	6.69311	7.33722	6.72766	8.09078	7.74846	7.97707	7.90608	7.31186	7.33217	8.08213	8.29327	7.90215	7.08885	7.87082	7.29033
ENSG00000069424.15_KCNAB2	6.06143	6.83539	5.44722	8.95751	4.10489	8.23198	5.58765	7.93583	5.49162	6.42656	5.65422	6.2792	5.68165	7.82135	5.71528	6.68763	7.48324	7.33666	5.70356	6.37379	5.21714	8.19621	5.94901	7.46234	5.43425	7.24235	6.23985	6.66381	6.17701	7.51398	5.5904	7.5213	7.15012	7.21258	5.53922	8.45517	5.83116	6.69305	6.04655	8.10491	7.00165	5.33115	7.46924	6.71898	7.66732	6.94958	7.96154	7.23451
ENSG00000069431.13_ABCC9	4.02595	4.21725	3.01382	2.99346	1.7056	5.43583	4.23378	5.75985	3.93992	4.41561	1.7056	5.13639	4.2077	3.75903	3.48495	5.00495	5.65591	3.5894	3.53552	4.11089	3.91188	4.19611	7.14721	4.09538	3.21008	8.84735	4.56412	4.43044	3.34457	5.64144	3.45937	5.50785	4.43802	3.88645	4.75718	4.28648	3.21475	4.03159	4.86936	3.31943	3.97783	4.61547	4.74976	3.80282	4.37258	4.94995	4.31374	3.83262
ENSG00000069493.15_CLEC2D	6.36688	4.37441	5.70885	2.64044	4.59851	4.77248	4.68385	4.02985	4.498	4.02398	1.7056	1.7056	5.81388	4.79202	5.65094	3.587	6.35132	5.85795	5.61143	5.7151	5.78608	5.51707	5.42009	6.00464	4.8925	4.89578	6.00294	4.92106	5.61054	6.17381	5.38243	4.4919	6.95747	5.47422	4.50646	7.08134	5.43388	5.96043	6.14552	3.98395	5.32569	5.16344	5.07296	4.99494	6.45918	6.20136	8.08319	4.04379
ENSG00000069509.6_FUNDC1	4.79023	4.2601	5.23098	3.5201	1.7056	4.06352	5.19427	4.6974	4.62173	5.52991	4.19829	4.39522	4.62717	4.75933	4.01231	4.34878	4.61498	4.50036	4.47649	5.22215	5.13943	5.55484	4.68057	4.90954	4.77931	5.21908	4.4564	4.7016	4.71382	4.87515	4.72744	4.64379	4.69454	4.9411	4.27475	4.46612	4.66394	4.93296	3.99272	4.89769	4.82199	4.42969	4.90594	4.5056	3.97404	4.99503	4.04435	5.36161
ENSG00000069535.14_MAOB	5.04434	5.25885	5.98404	1.7056	1.7056	4.33376	4.69353	4.54833	5.65218	3.41443	5.34556	5.97079	5.76875	4.21644	6.33235	3.45608	5.85258	3.1248	5.49121	5.318	5.72419	4.43772	7.53216	3.91698	5.22041	9.37341	6.84665	3.26007	5.82984	6.94507	7.32611	3.72674	5.73802	2.57088	6.81362	5.73374	5.61606	5.06503	4.3941	2.59388	5.29686	4.05046	4.84574	5.38226	4.58536	2.83159	6.13898	3.68401
ENSG00000069667.16_RORA	6.3382	5.25055	6.02111	4.7928	3.87863	5.74142	5.60202	6.26732	6.23626	7.10936	4.39566	1.7056	5.86958	6.29384	6.34854	4.25683	6.85816	5.38785	5.37653	7.11547	6.43	6.50558	7.10215	5.57198	6.37397	7.99612	6.73289	5.50225	6.14418	7.25256	6.80308	6.03573	6.72505	5.80674	6.62809	5.41983	5.94937	6.29256	6.68186	5.31574	6.89739	6.04565	6.54265	6.65084	8.18057	7.41958	6.9544	5.32866
ENSG00000069696.7_DRD4	4.05558	4.63098	1.7056	6.545	5.84387	6.92874	3.35885	5.61966	4.0549	3.88818	1.7056	5.38134	2.98513	4.03342	3.84065	5.16787	4.03662	3.25303	4.09356	3.23931	3.05677	4.12919	3.77339	3.70074	4.04562	4.64126	2.46824	5.27302	3.42982	3.38675	3.73933	3.34958	3.5617	3.37485	3.14158	5.98616	2.6765	3.81382	4.20915	4.21193	3.54035	3.86039	3.91694	4.09116	3.38073	3.76495	4.77783	3.842
ENSG00000069702.11_TGFBR3	6.77583	7.38526	6.17809	7.04779	6.71411	8.4386	7.30569	6.49735	7.33516	7.12572	8.64194	6.99202	8.36156	4.54813	7.05615	9.37587	7.45387	8.26615	5.93213	6.76261	6.27885	7.2988	9.25207	6.72127	5.7914	10.3418	7.48001	8.3992	5.85072	6.20995	5.2467	8.09118	7.03848	6.70082	7.98287	7.76304	5.7211	7.50909	7.61503	7.05243	6.81639	7.0996	6.58987	6.23064	6.48724	8.71357	7.23427	5.9389
ENSG00000069764.10_PLA2G10	6.02578	6.3922	6.60728	4.65187	4.64126	3.32066	5.47478	6.06688	7.35694	5.26844	7.42821	6.88284	5.85324	6.14633	6.65962	3.56869	6.19352	4.21463	6.76971	6.21737	6.68188	4.71836	6.16094	4.41199	5.48154	2.91474	5.63992	3.80735	6.21205	4.20868	6.33153	4.19553	5.97963	4.39673	5.73979	3.29192	7.17397	6.4027	6.10732	5.97348	5.72529	4.97815	5.73937	6.38039	5.65737	3.58044	5.37063	4.27552
ENSG00000069812.11_HES2	6.95722	7.23363	7.09851	7.11954	9.52885	7.97413	6.19764	8.21211	6.30676	5.83971	8.62514	8.50435	6.72653	6.74596	7.09904	5.67913	6.06254	6.55398	7.70457	7.56578	6.86798	5.39841	5.72177	6.9284	5.34504	2.90704	6.015	5.56026	6.87249	6.04852	7.16359	7.10826	6.62162	6.37582	6.66761	7.175	5.38204	5.6534	6.65716	8.60352	5.34572	5.70408	6.00618	7.61108	6.1448	3.13074	6.2552	7.29269
ENSG00000069849.11_ATP1B3	10.0781	9.98839	11.0327	7.82447	8.39331	8.12283	8.78104	8.3652	11.1883	8.3991	9.00963	7.29909	8.96758	9.07758	11.3918	7.67988	10.1776	8.67582	10.7031	8.98412	10.2319	8.96933	10.1427	8.66321	10.301	7.95028	9.73892	8.49072	11.6326	8.63047	10.94	8.48603	10.3767	9.00527	9.7978	7.65693	11.09	9.60674	9.96174	7.57338	9.72169	8.85339	9.91303	10.4077	9.22725	7.68872	9.39887	8.85483
ENSG00000069869.17_NEDD4	5.85138	6.42021	6.80277	6.77713	4.54755	6.04939	5.9567	6.51656	7.47013	7.12711	3.00116	5.21963	6.60388	7.48046	7.42632	6.57661	6.24895	6.33857	5.46665	6.32684	6.34699	7.89457	7.26818	6.61581	6.02302	8.57057	6.0681	6.96576	6.37842	7.48581	7.28879	7.30065	5.63384	6.7946	6.13113	7.64684	6.66078	8.0127	6.00725	5.04581	6.15948	5.46603	7.0559	5.42506	4.67445	7.37011	6.33044	6.30692
ENSG00000069943.10_PIGB	5.25295	4.42555	5.41687	3.97301	1.7056	3.56556	4.72985	3.49548	4.42709	4.86145	1.7056	1.7056	4.79925	4.57249	4.67549	5.08411	4.75625	5.22776	4.7706	4.78052	5.21862	4.68486	4.78127	4.40155	4.92401	4.7993	4.82109	4.54783	4.88231	5.18676	5.37502	4.09493	5.15598	4.55418	5.11648	4.55314	5.89172	6.07596	4.78887	1.7056	5.08859	5.32499	4.93756	4.61692	5.3875	5.22186	4.76942	3.84657
ENSG00000069956.13_MAPK6	8.62568	8.36953	9.5533	6.99046	7.68585	7.33604	8.05767	7.73327	9.81585	8.42598	8.43058	7.66242	8.80169	8.24285	10.314	7.55829	8.74471	8.96793	9.30028	8.59068	9.5195	8.26911	8.81219	7.10607	9.05672	7.75025	9.04959	8.05156	9.93076	8.57857	9.91948	8.08739	9.3862	7.07235	9.03162	7.48817	10.2122	9.19789	8.98969	6.16935	8.71987	8.34028	9.02775	9.15268	9.59819	8.787	8.225	7.36551
ENSG00000069966.19_GNB5	5.43536	4.20105	4.95385	5.52373	3.94099	6.41774	4.89388	6.1964	5.85342	5.05251	6.03737	5.41723	4.75634	5.37868	5.97204	7.01222	5.77448	6.32531	5.0149	5.87277	4.80131	5.51821	6.48278	4.51049	5.42299	8.15535	5.33613	4.74079	5.64802	6.14877	5.38772	6.27071	5.50071	4.31061	5.62193	5.62154	4.80618	6.00984	5.4967	4.32304	5.62876	5.51181	5.3687	4.75544	5.84775	6.32074	6.16061	3.76442
ENSG00000069974.16_RAB27A	6.10536	5.78333	7.94598	6.46993	6.86128	6.28378	6.37536	6.0215	5.91011	7.05815	1.7056	6.77092	7.57071	6.53216	7.03337	6.60796	7.19002	7.0492	6.56551	8.46529	7.78509	5.42127	6.38393	5.92007	7.54485	7.03592	7.18651	5.86207	6.17462	7.1902	6.67111	6.15672	6.78545	5.75873	7.38964	5.67438	6.80699	7.23292	7.07268	6.40197	6.23321	7.32475	6.18722	5.94049	7.43931	7.22863	6.52669	5.91648
ENSG00000069998.12_HDHD5	7.13827	7.60741	7.55651	7.79679	8.10021	7.6101	8.13672	7.71225	5.91895	7.85354	7.53094	8.03181	8.34016	7.23898	6.28235	6.65521	6.85093	7.00069	7.01173	6.79601	7.43817	7.17579	6.57228	8.03658	6.87668	6.6231	6.94592	8.04082	6.19596	7.04497	6.62048	7.61421	6.83092	8.11781	7.13215	6.89171	6.40789	6.42005	6.3742	7.96668	7.26497	6.86405	6.57981	6.69751	6.60403	7.50843	6.05714	8.26611
ENSG00000070010.19_UFD1	6.58797	6.57049	7.20036	5.22501	3.8743	6.02677	6.64419	6.00106	6.74372	7.54391	4.79438	6.11541	7.01161	6.72231	6.92159	6.54626	7.17865	7.59452	6.32461	7.11952	7.17158	6.81493	6.60736	6.82818	6.87787	6.35953	6.73901	6.47687	6.60482	7.46632	7.11821	7.11047	6.77044	7.2642	6.74979	6.54712	7.57208	6.76757	6.48709	6.22995	6.54774	6.50812	6.71321	6.05001	6.58017	7.26912	6.21042	6.72463
ENSG00000070018.9_LRP6	8.69142	8.76855	8.80704	8.25742	7.84561	8.20893	8.70678	7.81141	8.7604	8.95795	8.92748	7.74472	8.64296	8.69968	8.98514	8.46002	8.30318	9.03388	9.12755	7.93042	8.94095	8.94998	9.09529	9.24887	8.61609	9.78015	8.89428	8.82494	8.72556	8.49366	8.42629	8.92315	8.36696	9.32895	8.5337	9.21172	8.83775	9.45682	8.73728	8.11043	8.58469	8.92775	8.70694	8.77756	8.62466	8.74715	7.57498	8.61146
ENSG00000070019.5_GUCY2C	8.96331	8.92794	9.40607	7.84114	7.07702	7.05346	9.0332	7.37455	9.01091	8.56494	7.53132	6.96399	8.9891	8.94725	9.50312	4.41966	8.47137	5.64343	8.83278	8.05471	9.23349	9.08692	8.24307	9.24969	8.72262	2.57389	8.62233	8.48276	9.50153	8.29672	9.46501	8.31804	8.47468	9.62993	8.72199	8.95502	9.47725	9.40211	8.72135	8.73879	8.51094	9.01071	9.02915	9.17298	8.56913	4.32827	7.85232	8.38366
ENSG00000070047.13_PHRF1	9.05625	9.20334	8.12036	10.2372	10.6174	10.7395	8.97963	10.5791	9.39577	9.11772	10.5342	10.5893	9.1587	9.39883	9.0644	9.63288	9.26915	9.05709	9.51463	9.21043	8.77429	8.90927	8.85072	8.92492	8.95119	8.75966	9.1443	9.75997	8.83375	9.14399	9.11598	10.0057	9.59919	8.79746	8.62726	10.1406	8.8104	8.70303	9.58001	9.62442	9.33753	9.00098	8.93178	9.32024	9.12693	8.78657	10.0545	9.04081
ENSG00000070061.16_ELP1	7.50687	8.03367	7.52088	8.87004	6.90348	8.07696	7.99026	7.64242	7.43186	7.6274	7.50543	7.71671	7.71299	7.59779	7.02158	8.58734	7.58166	8.59114	7.41788	6.9292	7.59809	8.16478	7.53551	7.81763	7.57351	8.10322	7.31757	7.90141	7.29746	7.8502	6.99215	8.15097	6.9592	7.92297	7.4974	8.63592	7.2968	8.16493	7.52147	7.8772	7.13057	8.11944	7.40654	7.64013	7.63238	7.34749	6.75518	8.27593
ENSG00000070081.17_NUCB2	5.73639	5.27862	6.76482	5.44423	4.78287	6.04303	6.50443	5.81785	4.86132	6.66747	6.28612	4.36133	6.66869	5.89706	5.6413	6.54102	7.17563	8.289	4.47272	6.02863	6.76983	5.94616	6.89225	6.41662	6.05662	7.24393	6.13416	5.95406	5.29947	7.19869	4.96381	8.1221	5.8623	6.54729	6.62862	4.54912	6.31287	6.64308	5.63136	5.59703	6.14718	6.28181	5.97715	6.13762	6.30945	7.44288	5.58435	6.04743
ENSG00000070087.14_PFN2	6.22496	6.11669	6.53961	7.07337	4.33901	4.53354	7.1232	6.48396	5.70525	7.40002	6.48419	6.74295	6.49781	7.57172	6.50549	4.87732	6.98038	3.48284	6.11478	7.03826	6.95133	7.60662	7.30811	5.73703	7.09304	8.46213	7.04583	5.92774	6.50767	6.95831	7.0912	4.98685	6.28644	5.84244	7.0148	6.19769	5.9083	4.72708	5.96771	4.63939	6.68498	7.6639	7.09383	6.48305	5.5136	4.48717	5.23934	5.14992
ENSG00000070159.14_PTPN3	8.82823	8.94214	8.65715	8.44773	7.02043	7.97894	8.57446	8.65718	9.05409	8.73314	7.29693	7.05833	9.01035	9.0529	8.7196	8.29231	8.51931	9.08757	8.77564	8.44537	8.99794	9.54497	8.19861	8.72983	8.61115	4.83909	8.71157	8.45255	8.77902	8.47568	8.97149	8.57318	8.38336	8.58504	8.73319	9.71831	9.35766	9.20408	9.60587	7.78496	8.423	9.07006	8.74909	8.50272	8.32698	9.18231	8.08555	9.28705
ENSG00000070190.13_DAPP1	5.17317	4.54043	4.62949	3.98775	4.99452	6.3307	4.82092	4.87296	4.68139	5.05166	5.10337	3.41395	3.74382	5.46653	5.2066	4.48003	6.09554	4.94383	5.5242	5.21614	6.65349	4.90803	3.68553	6.22312	5.53633	4.07462	5.04966	3.72503	5.01485	6.15611	4.98039	5.1818	5.521	6.33374	5.63055	4.81418	6.82291	6.14993	5.83745	5.34579	5.71118	6.5001	6.15103	5.91827	7.18685	7.22968	6.86892	4.05529
ENSG00000070214.16_SLC44A1	10.8883	10.5023	11.3569	9.1888	10.867	8.89501	10.6588	9.93848	10.7217	9.57274	10.4569	9.90337	10.8393	10.153	11.3441	10.4896	10.4934	9.8652	10.9857	10.3546	11.0545	9.31786	10.3696	9.58347	10.6457	8.65756	10.598	9.45635	11.3332	9.30471	11.3244	9.21937	10.7091	9.66944	10.8918	9.10409	11.5622	10.541	10.6178	10.1125	10.7184	10.0369	9.90726	10.6451	10.3168	9.51993	9.76386	9.95151
ENSG00000070269.14_TMEM260	7.39194	7.1258	7.21852	6.91156	7.21576	6.03638	6.40034	6.35256	6.68989	7.2007	5.76869	4.95175	6.60667	6.89029	7.02046	6.44554	7.06797	6.57898	7.01057	6.74412	6.7211	7.11166	6.83039	7.44964	6.99282	5.98021	6.81347	7.20002	6.63783	6.55498	6.96994	6.69884	6.38535	7.7412	7.09203	7.65429	6.97484	7.53628	7.02723	6.79509	6.94066	7.63722	7.13823	6.72967	6.97763	7.28949	6.62909	6.97332
ENSG00000070366.14_SMG6	8.2685	7.98291	7.69826	7.80073	8.66002	8.86827	8.32108	8.83672	8.42695	7.64886	9.14239	9.41635	7.8882	7.85503	8.14244	8.15406	8.12747	8.16912	8.66484	8.01351	7.97463	6.82322	8.31882	7.96308	7.8594	8.73662	7.99519	8.28521	7.96184	8.19573	8.21979	8.82264	8.51786	7.5815	8.24066	8.92515	8.48519	7.53191	8.75675	8.51391	8.25794	7.51131	7.32261	8.54612	8.37732	8.10274	9.2804	7.81703
ENSG00000070367.16_EXOC5	7.97775	7.89414	8.35393	8.01375	7.69205	7.88804	7.75414	7.53193	7.67676	8.19403	8.42683	8.01436	8.24914	7.6913	7.98069	7.74562	7.92916	8.01537	7.82009	7.39394	8.35298	7.73684	8.2053	7.36563	7.86163	9.0952	7.91819	8.02088	7.57217	8.31742	7.89364	7.74529	7.77878	7.58394	8.11966	7.4401	8.4182	7.8115	7.70752	7.86306	8.08148	8.03751	7.58605	7.5405	8.01617	8.25313	7.55567	8.13793
ENSG00000070371.16_CLTCL1	5.56851	6.52518	3.98738	4.57355	6.77972	5.86842	6.17818	6.9748	5.14611	3.04429	6.57764	6.69658	3.99147	5.75272	5.04035	5.73251	4.88042	5.70419	4.71066	4.70897	4.53152	5.05345	5.44232	4.55681	5.95522	5.65393	5.15875	5.3794	4.07034	5.26715	4.62849	5.55262	4.688	5.18276	4.36321	6.03717	4.5622	4.15449	4.99406	5.41982	5.4221	4.56155	4.95753	4.86407	5.65585	5.15685	4.4194	5.6763
ENSG00000070404.10_FSTL3	4.80931	5.20554	4.38669	6.17631	4.11732	8.15225	5.6242	6.03533	4.89224	5.86666	6.72807	5.47875	6.24733	5.42954	4.89833	7.05851	5.53698	6.76046	4.29286	5.22834	4.77153	5.0883	6.03617	7.05282	4.60759	8.08184	5.37645	5.83119	3.88062	5.56522	4.43469	5.80221	5.64919	6.69833	6.20256	8.05593	4.44346	4.88569	5.75121	6.13077	5.00463	4.2686	4.76064	4.86597	4.19093	6.78327	6.16652	5.98185
ENSG00000070413.20_DGCR2	9.72425	9.72227	9.9904	9.58546	10.9239	9.78035	10.0006	9.80774	10.0227	9.07475	10.9171	9.83568	9.76026	9.3458	10.2928	9.12284	9.61894	9.13467	10.3975	9.24182	10.022	8.25732	9.6852	9.10889	9.50296	9.64083	9.38212	9.58671	10.3227	8.80683	10.1256	8.72501	9.57064	9.13624	9.60309	9.34813	10.088	9.26565	9.52881	9.97075	9.64643	9.09444	9.29707	9.88489	9.349	9.47144	9.33151	9.63473
ENSG00000070423.18_RNF126	7.29247	7.48792	7.53467	8.08916	7.99982	7.82676	7.90137	8.09357	7.16148	7.20794	8.7291	8.57901	7.94457	7.57302	7.51088	6.82928	7.6066	7.63425	7.56554	7.40547	7.90271	6.99844	7.19764	7.28891	7.55327	6.61895	7.34004	7.57239	7.52071	7.63959	7.61641	7.92971	7.40774	7.57011	7.23552	7.07917	7.49407	6.99372	7.33885	7.9088	7.22831	7.13504	7.12266	7.47987	7.07484	7.5467	7.37815	7.48017
ENSG00000070444.15_MNT	7.79366	7.90071	6.68522	9.19219	9.41555	9.17428	7.72281	9.15778	9.07433	7.11703	8.16119	8.89847	7.14674	7.36146	7.24572	7.69709	8.07008	8.52742	7.55068	7.66085	7.53307	7.51047	7.41904	7.62385	7.97097	8.24603	7.44072	8.52139	7.48488	7.89782	6.94252	8.53675	7.66561	7.26588	7.1186	9.27049	7.29207	7.41562	8.49793	9.0019	7.3667	7.28807	6.93481	7.4219	7.42382	7.99103	8.28787	7.66361
ENSG00000070476.15_ZXDC	8.16322	8.17411	7.26632	8.43252	8.12289	8.77662	7.96223	8.48945	8.27675	7.49625	8.47378	8.07468	7.76747	8.06911	8.16891	8.60197	7.90151	8.22637	8.65929	8.20502	7.6511	7.85438	8.02778	7.86506	7.88504	7.76357	8.36582	8.2328	7.90474	8.10389	8.35505	8.98362	8.58601	7.65051	7.99795	8.84206	7.96487	7.63608	8.62265	8.03129	8.08403	8.15801	8.25126	8.18715	8.23088	7.64416	8.71408	8.0452
ENSG00000070495.15_JMJD6	6.6347	7.1692	6.10521	7.34808	6.33541	7.73583	7.59283	7.88251	8.11154	7.97851	7.50522	6.8388	7.13473	6.94225	7.1019	7.48324	7.00392	7.11013	7.10348	7.12076	6.76447	7.21832	6.56107	6.29676	6.65391	7.22891	6.88549	7.30453	6.45678	7.27038	6.49962	7.56467	6.56085	6.07518	6.71697	7.57774	7.0422	6.20879	7.30791	6.96916	6.81348	6.34632	6.56164	7.16861	7.02789	6.61314	7.21009	7.0027
ENSG00000070501.12_POLB	4.03454	5.57956	5.13223	4.78978	1.7056	4.89964	5.3003	4.29687	3.86905	5.80198	1.7056	1.7056	4.49753	5.54631	4.00623	5.15829	5.39568	5.89048	4.58628	5.17496	4.66656	5.34898	4.97737	5.0403	4.76679	4.83691	4.43057	5.58564	3.92685	5.55362	4.35202	5.31224	4.08471	5.57162	4.74774	4.35007	4.62858	4.62937	4.72521	4.94803	4.58904	5.1473	5.43457	4.44732	5.02742	5.612	4.96099	5.5174
ENSG00000070526.15_ST6GALNAC1	9.60146	9.62191	10.5079	6.79568	8.58585	7.88715	10.0744	8.55622	9.3603	7.21656	8.72752	8.97769	9.55753	8.84607	8.53406	6.24982	8.31948	8.77795	8.35064	8.54976	10.3115	6.90088	8.84712	7.00205	8.98663	4.12996	8.66974	8.70175	9.5604	8.23005	9.26029	7.91385	8.01208	7.68377	8.99628	5.91016	8.31682	7.23576	9.44836	7.24347	8.86125	9.04395	7.60482	8.36019	8.62948	8.23133	8.60013	7.63371
ENSG00000070540.13_WIPI1	8.28952	7.59007	8.01536	6.56452	4.19978	6.6302	7.31063	5.89166	7.4606	7.64936	5.96583	6.58634	7.39707	7.98499	7.48022	7.03602	7.90272	6.72163	7.59221	8.25539	7.52148	7.5615	6.98197	6.34585	7.58513	5.96471	7.5493	7.25199	7.80195	7.22249	8.09611	8.29833	7.70142	6.18929	7.69098	6.74558	7.80017	7.14631	7.90872	6.70685	7.68993	8.17807	6.78515	6.43987	7.96424	6.03851	7.99591	7.51159
ENSG00000070610.14_GBA2	9.97229	9.56741	9.48181	9.65893	10.4224	10.0211	9.76067	9.8925	10.6366	8.03841	10.7577	9.84279	9.94489	9.19101	10.225	9.17928	9.72821	8.83813	10.4925	9.41242	9.93562	8.76549	9.60375	8.62002	9.90369	9.06234	9.64139	9.0374	9.97932	9.43093	10.201	9.81813	9.65673	8.27872	9.70577	9.1797	10.4773	9.15307	10.3385	9.37861	9.87221	9.14841	9.5931	10.4396	9.96508	8.61257	9.89286	8.98681
ENSG00000070614.15_NDST1	9.12281	8.38941	8.59062	8.50863	9.27506	8.52226	8.12118	8.53135	8.98776	8.32483	8.83105	8.2615	8.84369	8.53217	8.87933	8.4911	9.0101	8.10106	8.92544	8.74901	9.00982	7.81219	8.91831	8.45939	8.52363	9.56291	8.79951	8.29802	9.26769	8.62446	9.31199	8.60356	9.09227	8.24424	9.20789	7.78196	9.36934	8.66803	8.60895	8.12714	8.59411	7.95473	8.42333	9.18838	9.15603	8.58206	8.19603	8.54834
ENSG00000070669.17_ASNS	6.20743	7.06667	5.98656	6.4824	3.83556	5.08579	6.12016	4.76405	5.50531	7.42904	4.30187	3.32279	6.97608	7.17554	6.4901	5.91902	5.92249	7.39023	5.39174	5.31131	6.22777	7.07731	5.73912	6.83709	5.87678	6.93477	6.0455	7.4614	5.40326	7.07912	5.96555	6.94798	5.9002	7.34611	5.94261	5.81564	5.44095	5.84326	6.18977	5.51539	5.55776	6.43512	7.7148	5.97944	6.08814	6.8078	5.8101	6.19106
ENSG00000070718.12_AP3M2	6.03109	6.10561	6.15813	6.27046	6.53769	6.66165	6.17226	5.85228	4.69959	6.46129	3.87289	5.09919	5.75249	5.85812	5.65795	7.24653	5.40408	7.20337	5.56057	5.42702	5.87207	6.95326	6.34507	7.18617	6.16108	7.23751	5.94424	6.54436	4.43477	6.41189	5.07954	6.90149	5.5302	7.03451	6.12907	7.74554	5.36133	6.63558	6.19698	5.66401	6.01332	6.35307	6.25474	5.47701	6.10419	7.00465	5.29206	6.76428
ENSG00000070756.17_PABPC1	12.008	12.6445	12.637	12.9864	10.6408	12.3236	12.5582	12.6544	11.2194	13.1825	11.5953	11.2126	12.1422	12.5943	11.7979	13.169	12.1369	12.3864	11.5274	12.305	11.6988	12.512	11.8943	12.1706	12.1075	11.962	12.0689	12.4859	11.7564	12.4484	11.75	12.0046	11.5996	12.4237	12.2004	12.8324	11.3057	11.3363	11.52	11.6477	12.12	12.6995	13.2299	12.0674	11.9789	12.4267	11.9839	13.4327
ENSG00000070759.17_TESK2	6.7451	5.90984	6.57997	5.48879	5.63365	5.92476	5.92612	4.50316	7.15275	5.46687	5.86419	3.97716	4.69355	5.21218	7.04387	4.6545	6.24686	6.11701	6.42519	6.09984	6.41132	4.46898	6.48251	5.62709	6.8725	5.44287	6.71734	5.58001	7.31476	5.22562	6.64182	5.6107	6.36649	5.70812	5.68187	5.13021	6.897	5.4706	6.93764	5.55427	6.5705	5.64086	5.25028	6.28029	6.58297	5.60129	6.8999	5.10927
ENSG00000070761.8_CFAP20	5.01356	5.5706	6.07882	4.44685	5.25351	5.39446	5.77926	5.11789	5.50218	6.33988	3.56651	4.40298	5.76874	5.3161	5.39854	5.91527	5.55802	6.16566	4.88308	4.99243	5.45449	6.55786	5.65326	5.95608	5.80074	5.91842	5.82678	5.60506	5.71793	5.52204	5.5281	6.10082	5.39718	6.23609	5.37076	4.64975	5.29513	5.59931	5.21766	5.07923	5.33715	5.79267	5.85738	5.20375	5.37586	6.19828	5.11237	5.88466
ENSG00000070770.10_CSNK2A2	6.61266	7.2054	6.8499	7.85315	6.21725	7.07817	7.18557	7.66938	6.96941	7.75488	6.59737	8.13977	6.71806	7.65707	6.87871	7.32578	7.18223	7.14966	6.55308	7.38502	6.97646	7.21925	7.13979	7.1968	6.86981	7.95148	6.77698	7.43878	6.89821	7.10835	6.8979	6.93945	7.1865	7.40803	6.92592	8.16061	6.70419	6.94566	6.75482	7.4246	6.8316	7.32375	7.38477	7.07968	6.8202	7.34958	6.96764	7.61053
ENSG00000070778.13_PTPN21	8.22522	8.34452	8.16233	7.4807	10.0875	7.80977	8.15215	7.80517	8.94318	6.54514	9.61269	9.03425	7.89253	7.72528	8.819	6.65766	7.99083	6.14235	8.91961	8.79638	8.13519	6.58196	8.53594	6.76904	8.16825	8.76719	8.20568	6.73971	8.98892	6.88748	8.4614	7.31265	8.62475	6.577	8.05983	7.69227	8.33628	7.57609	8.11149	7.44818	8.30628	7.6615	7.85747	8.55675	7.92693	6.64713	8.8131	6.69021
ENSG00000070785.17_EIF2B3	5.39776	5.58344	5.65361	6.30967	4.05367	5.80339	6.40072	5.94529	5.20973	5.93905	4.56114	5.17386	6.87351	5.50116	4.46217	5.86189	5.72349	6.44378	5.59887	6.06704	5.9696	5.70574	5.73974	5.83857	5.91919	6.37573	5.5297	6.29586	4.84058	6.33631	4.76128	5.26824	4.79462	6.44388	5.48091	5.87787	5.50341	6.55869	5.41159	6.04287	5.32346	6.0654	5.6922	5.47366	5.52994	5.85467	5.57577	6.11758
ENSG00000070808.17_CAMK2A	3.9356	3.98099	3.26955	4.74735	6.16376	4.68414	3.63779	1.7056	5.23795	3.29593	3.03952	3.38188	3.39009	2.9556	4.07766	3.2859	4.14319	2.95587	4.7575	2.5965	4.21451	4.08364	5.47853	4.38325	3.90179	5.2812	4.78481	3.68604	4.55504	3.77832	4.93453	3.40569	3.80156	3.58056	4.12	3.36617	4.99867	5.00387	5.31151	3.95233	4.46324	3.19925	3.87939	4.03104	4.31989	2.26614	3.45916	2.59421
ENSG00000070814.22_TCOF1	7.25933	7.91428	7.19739	9.22076	6.40851	8.44514	8.0697	8.49153	7.63571	8.81436	6.64319	7.83944	8.42985	8.16398	7.02452	8.78544	7.45941	8.33458	7.13327	7.0865	8.01788	8.79878	7.81954	8.65692	8.11033	8.04025	7.87418	9.11452	6.80386	8.32961	6.60077	8.67346	7.33375	8.84606	7.16835	8.24459	6.8541	7.90925	8.11713	8.43144	7.21795	8.12306	7.79281	7.01862	7.51387	8.23938	7.96127	8.6213
ENSG00000070831.17_CDC42	10.3882	10.1414	11.2101	8.54467	7.23246	9.38798	10.0002	9.08179	10.7838	10.4397	9.07175	8.76693	10.4998	10.4179	11.2679	9.14627	11.0077	10.4383	10.5311	11.1179	10.8763	10.2543	10.601	9.9791	10.8053	10.3094	10.7851	9.68277	11.2802	10.7169	11.303	9.92095	10.8101	10.2447	11.1734	9.25422	11.6999	10.6573	10.3612	9.13157	10.6755	9.89835	10.803	10.5771	10.7149	10.322	10.2074	9.99061
ENSG00000070882.13_OSBPL3	6.88841	7.81874	6.09888	7.85163	7.09803	8.29826	7.04253	7.32051	6.69123	8.50836	5.38828	7.49182	7.15153	8.7262	7.00636	9.05569	7.44458	9.4286	6.5355	6.98339	7.07404	8.58477	6.3249	8.51288	7.11135	4.74798	7.20766	8.19746	6.44722	8.59806	6.76953	8.73997	7.41135	8.76595	7.06183	9.41459	7.09816	8.23756	7.47254	7.3318	7.33169	7.7517	7.96635	7.33964	8.07674	8.14915	8.06185	7.93719
ENSG00000070950.10_RAD18	6.70308	6.52471	6.29224	6.11062	5.9437	6.60018	8.07469	7.41584	6.86222	6.81767	6.85879	3.17583	6.65065	6.21431	7.00148	6.97861	5.6247	7.22551	6.78257	5.76368	7.14481	6.7054	6.48011	6.96513	6.90298	6.55028	6.55143	7.42493	6.39795	6.62181	6.26817	7.02287	6.84539	7.415	6.37911	6.89044	7.3905	7.18261	7.04197	6.88217	5.87107	6.89728	6.14611	5.63654	6.09784	7.54542	6.53443	6.49944
ENSG00000070961.16_ATP2B1	8.95732	8.85854	10.1967	7.96633	8.12452	8.34674	9.08658	8.25212	10.179	7.76309	8.84835	8.43851	9.64581	8.56537	9.80944	7.63128	9.35466	8.20728	9.13294	8.28078	10.1681	8.4413	9.29752	8.36332	9.15621	8.66761	9.06325	8.09193	10.1701	8.87934	10.0044	8.63239	9.07456	8.673	9.75246	7.59486	11.3555	9.40289	9.6414	7.42058	8.77513	8.4641	9.10093	9.60647	8.81949	8.3492	8.83961	8.51943
ENSG00000070985.13_TRPM5	6.32875	5.65463	6.21782	6.5841	7.0344	7.15827	5.93728	6.35239	6.69818	2.92876	8.45868	6.92054	7.73064	5.27628	6.00809	7.8967	6.65208	3.2579	7.56726	5.6356	5.75326	4.78867	4.91751	5.11597	6.59987	2.89866	8.18108	5.7988	6.74547	5.75731	7.75533	5.56234	7.32968	4.9406	4.89171	3.67807	6.3802	6.83346	6.98773	7.42814	6.96711	6.77042	4.79575	6.27727	6.74983	3.79199	7.67841	3.15691
ENSG00000071051.14_NCK2	8.54585	8.5448	8.32914	8.46985	9.50423	7.55948	8.10469	8.08489	8.11024	8.34153	8.84814	8.71274	7.94937	8.63727	8.22779	7.87647	8.25539	8.13304	8.37303	8.41421	7.75573	8.4514	7.94091	7.84206	8.1223	8.75345	8.46772	7.93077	8.39877	8.32016	8.58679	7.30119	8.4864	7.62117	8.32115	7.89642	8.27076	8.44202	7.87613	8.6088	8.52885	7.98476	8.24243	8.51487	8.28005	8.02307	8.18719	8.14239
ENSG00000071054.16_MAP4K4	8.24334	7.85425	8.07751	7.96096	8.44536	9.70516	8.21865	8.71736	7.76258	9.13285	8.25588	8.96822	8.64542	8.89322	7.89196	9.50306	8.61472	9.49102	8.29339	8.49918	8.1332	8.77116	8.52233	8.94798	8.08587	9.18913	8.55307	8.34488	7.52847	9.05204	7.84584	9.47188	8.40758	8.69308	8.3144	8.86859	8.22596	8.79718	8.37316	8.14419	8.34098	8.56074	8.63098	7.85347	8.09112	8.46697	8.97463	8.28761
ENSG00000071073.13_MGAT4A	10.0078	9.62648	9.88563	7.01934	9.67323	8.27356	9.04981	7.89321	9.54111	8.78095	9.80308	7.23873	9.23222	9.27944	10.6805	8.88939	9.94959	8.17818	10.2498	9.23272	10.0138	8.21496	9.76827	8.06062	9.81552	7.48664	9.88966	8.38799	10.8603	9.14133	10.7763	9.28852	9.89233	8.3547	9.9608	7.98274	10.6432	9.55467	9.5941	8.37823	9.66272	8.54823	10.152	10.5513	10.0045	8.30374	9.35625	8.42867
ENSG00000071082.11_RPL31	8.4446	8.30268	9.41611	7.65786	6.63461	7.93583	8.79451	7.72675	8.44416	10.1818	6.31581	5.47099	8.89233	9.56623	8.51805	9.66189	9.05657	9.43312	7.98268	9.46378	8.82955	9.08649	9.12584	9.40968	9.18864	9.13501	9.02517	9.00488	8.28187	8.90414	8.65431	8.90522	8.55198	9.82206	9.16591	8.80875	8.27768	9.24509	8.26055	8.01017	9.11856	9.42642	8.92068	8.03578	8.60982	9.25204	8.94638	9.52483
[truncated: 14,921 more rows]
