# Supplementary material
Source: Research Square preprint supplement (doi:10.21203/rs.3.rs-9763213/v1)
Supplement: Supplementary file 12 [file 9a2c84cc27c60ab6e362a438.xlsx]

## Sheet: H3K9me2_SW1116
chr1	590001	595000	5000	*	1.06514
chr1	1375000	1389999	15000	*	1.07108
chr1	3849998	3854997	5000	*	1.00963
chr1	4339998	4344997	5000	*	1.1437
chr1	5169997	5174996	5000	*	1.02186
chr1	5494997	5504996	10000	*	1.1142
chr1	5579997	5584996	5000	*	1.09128
chr1	6649996	6659995	10000	*	1.53613
chr1	6914996	6919995	5000	*	1.08124
chr1	8169995	8194994	25000	*	1.02058
chr1	11129993	11134992	5000	*	1.05818
chr1	11999992	12004991	5000	*	1.15174
chr1	12129992	12134991	5000	*	1.08734
chr1	14509990	14524989	15000	*	1.03326
chr1	16774988	16779987	5000	*	1.19149
chr1	17214988	17219987	5000	*	1.02017
chr1	18404987	18409986	5000	*	1.00112
chr1	18874987	18884986	10000	*	1.213
chr1	20044986	20054985	10000	*	1.07609
chr1	20814985	20819984	5000	*	1.03565
chr1	21314985	21319984	5000	*	1.05228
chr1	21769984	21774983	5000	*	1.07238
chr1	22189984	22204983	15000	*	1.08674
chr1	22264984	22269983	5000	*	1.16265
chr1	23329983	23334982	5000	*	1.00985
chr1	23574983	23579982	5000	*	1.03117
chr1	24714982	24719981	5000	*	1.41343
chr1	24894982	24899981	5000	*	1.00046
chr1	27999979	28004978	5000	*	1.25973
chr1	28749979	28754978	5000	*	1.07352
chr1	29164978	29174977	10000	*	1.04545
chr1	30094978	30099977	5000	*	1.05361
chr1	32739976	32744975	5000	*	1.53552
chr1	34419974	34429973	10000	*	1.09554
chr1	35639973	35644972	5000	*	1.28772
chr1	36144973	36149972	5000	*	1.27648
chr1	36159973	36164972	5000	*	1.04567
chr1	37659972	37664971	5000	*	1.002
chr1	37684972	37689971	5000	*	1.17853
chr1	39069971	39084969	14999	*	1.27931
chr1	39084970	39089969	5000	*	1.0547
chr1	39599970	39604969	5000	*	1.1555
chr1	39699970	39704969	5000	*	1.04273
chr1	39839970	39844969	5000	*	1.00222
chr1	40984969	40994968	10000	*	1.05304
chr1	41374969	41399968	25000	*	1.15622
chr1	41399969	41404968	5000	*	1.12183
chr1	42629968	42634967	5000	*	1.04019
chr1	42789968	42799967	10000	*	1.27161
chr1	43499967	43509966	10000	*	1.04475
chr1	45359966	45364965	5000	*	1.2086
chr1	47579964	47589963	10000	*	1.13244
chr1	51344961	51349960	5000	*	1.08959
chr1	51689960	51724959	35000	*	1.08424
chr1	52569960	52584959	15000	*	1.21805
chr1	54344958	54354957	10000	*	1.3712
chr1	55839957	55844956	5000	*	1.28694
chr1	55989957	55999956	10000	*	1.2369
chr1	60054954	60059953	5000	*	1.45911
chr1	60059954	60064953	5000	*	1.22452
chr1	60074954	60089953	15000	*	1.00053
chr1	60459954	60469953	10000	*	1.12978
chr1	60469954	60479953	10000	*	1.35431
chr1	60839953	60854952	15000	*	1.16976
chr1	60854953	60859952	5000	*	1.02429
chr1	61089953	61094952	5000	*	1.06551
chr1	62089952	62104951	15000	*	1.12135
chr1	63119951	63124950	5000	*	1.0319
chr1	63434951	63439950	5000	*	1.48413
chr1	66009949	66019948	10000	*	1.08881
chr1	66199949	66209948	10000	*	1.06448
chr1	66869948	66874947	5000	*	1.03259
chr1	67089948	67094947	5000	*	1.04526
chr1	68239947	68249946	10000	*	1.48613
chr1	68299947	68314946	15000	*	1.15134
chr1	69104947	69109946	5000	*	1.00557
chr1	69109947	69114946	5000	*	1.11495
chr1	69419946	69424945	5000	*	1.47439
chr1	70004946	70014945	10000	*	1.03419
chr1	70639945	70649944	10000	*	1.07332
chr1	72514944	72524943	10000	*	1.11455
chr1	72904944	72909943	5000	*	1.06464
chr1	73399943	73404942	5000	*	1.16347
chr1	73584943	73589942	5000	*	1.56348
chr1	74379942	74384941	5000	*	1.09279
chr1	74674942	74689941	15000	*	1.00007
chr1	76484941	76494940	10000	*	1.16844
chr1	77094940	77104939	10000	*	1.21165
chr1	77729940	77739939	10000	*	1.11518
chr1	78789939	78794938	5000	*	1.23298
chr1	80299938	80304937	5000	*	1.31703
chr1	83679935	83684934	5000	*	1.065
chr1	84119935	84129934	10000	*	1.0234
chr1	84364935	84384934	20000	*	1.26806
chr1	85594934	85599933	5000	*	1.00451
chr1	85704934	85734932	29999	*	1.39643
chr1	87784932	87794931	10000	*	1.16084
chr1	88109932	88129931	20000	*	1.18649
chr1	88794931	88799930	5000	*	1.04613
chr1	89529930	89534929	5000	*	1.04471
chr1	90919929	90929928	10000	*	1.10477
chr1	90959929	90964928	5000	*	1.26622
chr1	93199928	93204927	5000	*	1.01353
chr1	93394927	93424926	30000	*	1.05425
chr1	94404927	94409926	5000	*	1.14552
chr1	95504926	95514925	10000	*	1.08001
chr1	95969925	95989924	20000	*	1.31982
chr1	96999925	97004924	5000	*	1.10242
chr1	97054925	97074923	19999	*	1.01753
chr1	98454923	98459922	5000	*	1.35914
chr1	98899923	98904922	5000	*	1.02589
chr1	99159923	99164922	5000	*	1.09256
chr1	100394922	100399921	5000	*	1.18415
chr1	100774922	100779921	5000	*	1.04239
chr1	101094921	101104920	10000	*	1.14862
chr1	103299920	103314919	15000	*	1.00457
chr1	103779919	103794918	15000	*	1.04439
chr1	103884919	103889918	5000	*	1.07166
chr1	104509919	104514918	5000	*	1.14957
chr1	104619919	104624918	5000	*	1.28469
chr1	105159918	105164917	5000	*	1.02162
chr1	105354918	105364917	10000	*	1.07609
chr1	105909917	105914916	5000	*	1.13759
chr1	106554917	106564916	10000	*	1.28106
chr1	107929916	107934915	5000	*	1.1018
chr1	108029916	108054915	25000	*	1.03639
chr1	108879915	108894914	15000	*	1.40671
chr1	109264915	109289914	25000	*	1.00229
chr1	110049914	110069913	20000	*	1.25904
chr1	110224914	110234913	10000	*	1.23265
chr1	110359914	110374913	15000	*	1.20543
chr1	110624914	110629913	5000	*	1.30491
chr1	111594913	111599912	5000	*	1.18207
chr1	112004913	112009912	5000	*	1.11843
chr1	112094913	112119912	25000	*	1.11153
chr1	112999912	113014911	15000	*	1.0465
chr1	113839911	113844910	5000	*	1.31163
chr1	113854911	113864910	10000	*	1.33691
chr1	114349911	114359910	10000	*	1.10056
chr1	114559911	114564910	5000	*	1.04107
chr1	114589911	114599910	10000	*	1.09537
chr1	115614910	115619909	5000	*	1.18215
chr1	115949910	115969909	20000	*	1.25728
chr1	116769909	116774908	5000	*	1.31792
chr1	117139909	117144908	5000	*	1.1574
chr1	117214909	117219908	5000	*	1.14685
chr1	117439908	117449907	10000	*	1.3697
chr1	117889908	117899907	10000	*	1.14802
chr1	118314908	118319907	5000	*	1.10792
chr1	119104907	119109906	5000	*	1.04823
chr1	120879906	120884905	5000	*	1.23391
chr1	121539905	121544904	5000	*	1.02505
chr1	143544888	143549887	5000	*	1.05589
chr1	145579886	145589885	10000	*	1.10123
chr1	145944886	145949885	5000	*	1.12738
chr1	147174885	147184884	10000	*	1.00728
chr1	147399885	147404884	5000	*	1.19124
chr1	151274882	151279880	4999	*	1.07142
chr1	151344881	151349880	5000	*	1.06297
chr1	152084881	152094880	10000	*	1.11655
chr1	152879880	152889879	10000	*	1.19033
chr1	153284880	153304879	20000	*	1.41478
chr1	153709880	153719879	10000	*	1.18033
chr1	153954879	153959878	5000	*	1.16751
chr1	154509879	154519878	10000	*	1.01804
chr1	154754879	154759878	5000	*	1.56973
chr1	155939878	155964877	25000	*	1.18033
chr1	156169878	156179877	10000	*	1.39142
chr1	157789876	157799875	10000	*	1.2688
chr1	157834876	157839875	5000	*	1.0931
chr1	158049876	158054875	5000	*	1.37204
chr1	159389875	159394874	5000	*	1.14082
chr1	159914875	159919874	5000	*	1.21881
chr1	160704874	160714873	10000	*	1.00715
chr1	160909874	160934873	25000	*	1.05589
chr1	161149874	161154873	5000	*	1.13127
chr1	161764873	161774872	10000	*	1.16102
chr1	161999873	162004872	5000	*	1.09337
chr1	162549873	162554872	5000	*	1.26963
chr1	162604873	162624871	19999	*	1.0297
chr1	163189872	163199871	10000	*	1.11568
chr1	163549872	163559871	10000	*	1.16514
chr1	164724871	164734870	10000	*	1.34399
chr1	164879871	164884870	5000	*	1.00065
chr1	165089871	165094870	5000	*	1.27613
chr1	165209870	165214869	5000	*	1.16016
chr1	165404870	165414869	10000	*	1.10264
chr1	165649870	165659869	10000	*	1.53868
chr1	166129870	166144869	15000	*	1.08499
chr1	166694869	166699868	5000	*	1.06983
chr1	166704869	166729868	25000	*	1.20254
chr1	166754869	166759868	5000	*	1.01159
chr1	167929868	167939867	10000	*	1.08145
chr1	168369868	168374867	5000	*	1.03815
chr1	168834868	168839867	5000	*	1.08301
chr1	169824867	169834866	10000	*	1.13981
chr1	169929867	169934866	5000	*	1.12536
chr1	171834865	171839864	5000	*	1.1374
chr1	172434865	172439864	5000	*	1.11632
chr1	174519863	174534862	15000	*	1.01353
chr1	174844863	174849862	5000	*	1.01726
chr1	174889863	174894862	5000	*	1.16606
chr1	175394862	175399861	5000	*	1.08275
chr1	175709862	175734861	25000	*	1.02165
chr1	175924862	175934861	10000	*	1.08288
chr1	176009862	176014861	5000	*	1.01134
chr1	176389862	176394861	5000	*	1.06732
chr1	176459862	176464861	5000	*	1.04826
chr1	177579861	177584860	5000	*	1.12631
chr1	177584861	177604860	20000	*	1.04119
chr1	178104860	178109859	5000	*	1.24049
chr1	178194860	178219859	25000	*	1.15622
chr1	178949860	178954859	5000	*	1.09497
chr1	179014859	179019858	5000	*	1.18505
chr1	180384858	180394857	10000	*	1.02491
chr1	180664858	180669857	5000	*	1.20623
chr1	180694858	180699857	5000	*	1.41247
chr1	180709858	180714857	5000	*	1.04425
chr1	180764858	180769857	5000	*	1.42655
chr1	180769858	180774857	5000	*	1.34979
chr1	181164858	181169857	5000	*	1.29404
chr1	181374858	181384857	10000	*	1.10659
chr1	181709857	181714856	5000	*	1.19282
chr1	182129857	182144856	15000	*	1.07092
chr1	183119856	183129855	10000	*	1.11856
chr1	183324856	183334855	10000	*	1.60572
chr1	184209855	184219854	10000	*	1.06089
chr1	185549854	185554853	5000	*	1.00692
chr1	185769854	185774853	5000	*	1.00046
chr1	186594853	186599852	5000	*	1.07701
chr1	187264853	187269852	5000	*	1.03825
chr1	188414852	188419851	5000	*	1.01312
chr1	188604852	188609851	5000	*	1.10478
chr1	189629851	189634850	5000	*	1.23934
chr1	191634849	191639848	5000	*	1.16691
chr1	192804849	192814848	10000	*	1.1326
chr1	193184848	193189847	5000	*	1.00549
chr1	196184846	196189845	5000	*	1.10478
chr1	196244846	196249845	5000	*	1.01354
chr1	196489846	196494845	5000	*	1.10276
chr1	196599846	196609845	10000	*	1.08234
chr1	196794845	196799844	5000	*	1.00761
chr1	196809845	196814844	5000	*	1.03063
chr1	197679845	197689844	10000	*	1.05876
chr1	197949844	197954843	5000	*	1.0984
chr1	198004844	198019843	15000	*	1.08774
chr1	198679844	198684843	5000	*	1.67418
chr1	198979844	198984843	5000	*	1.27652
chr1	199489843	199494842	5000	*	1.25422
chr1	199824843	199829842	5000	*	1.00549
chr1	199839843	199849842	10000	*	1.26359
chr1	199959843	199964842	5000	*	1.13565
chr1	200054843	200059842	5000	*	1.14012
chr1	202199841	202209840	10000	*	1.15211
chr1	202789841	202804840	15000	*	1.06209
chr1	203159840	203169839	10000	*	1.14656
chr1	203694840	203699839	5000	*	1.1316
chr1	203924840	203929839	5000	*	1.18941
chr1	205509838	205519837	10000	*	1.35634
chr1	206264838	206269837	5000	*	1.28847
chr1	206704838	206709837	5000	*	1.18166
chr1	207469837	207474836	5000	*	1.01907
chr1	207714837	207719836	5000	*	1.00479
chr1	207934837	207939836	5000	*	1.07419
chr1	209004836	209009835	5000	*	1.0128
chr1	209529835	209544834	15000	*	1.0191
chr1	211119834	211124833	5000	*	1.02215
chr1	213139832	213144831	5000	*	1.09496
chr1	214399831	214404830	5000	*	1.21874
chr1	214414831	214424830	10000	*	1.1975
chr1	214534831	214539830	5000	*	1.04734
chr1	214744831	214749830	5000	*	1.08443
chr1	215089831	215109830	20000	*	1.11738
chr1	218159828	218164827	5000	*	1.41969
chr1	218849828	218854827	5000	*	1.32755
chr1	218994828	219009827	15000	*	1.21364
chr1	219294828	219299827	5000	*	1.26031
chr1	219499827	219504826	5000	*	1.58248
chr1	220219827	220234826	15000	*	1.26305
chr1	220769826	220774825	5000	*	1.12854
chr1	221719826	221724825	5000	*	1.22337
chr1	222144825	222149824	5000	*	1.03126
chr1	222374825	222389824	15000	*	1.34322
chr1	222389825	222394824	5000	*	1.09412
chr1	223424824	223444823	20000	*	1.10064
chr1	223634824	223649823	15000	*	1.12174
chr1	224804823	224814822	10000	*	1.11374
chr1	226059822	226069821	10000	*	1.10792
chr1	226194822	226209821	15000	*	1.14758
chr1	226799822	226804821	5000	*	1.12981
chr1	227094821	227104820	10000	*	1.01039
chr1	227414821	227419820	5000	*	1.62051
chr1	227989821	228004820	15000	*	1.06639
chr1	228884820	228899819	15000	*	1.11743
chr1	230399819	230404818	5000	*	1.19371
chr1	230419819	230429818	10000	*	1.07952
chr1	230664819	230674818	10000	*	1.01073
chr1	232014817	232029816	15000	*	1.03615
chr1	232084817	232089816	5000	*	1.51987
chr1	232119817	232139816	20000	*	1.11351
chr1	232699817	232709816	10000	*	1.23456
chr1	233309816	233314815	5000	*	1.10889
chr1	233334816	233339815	5000	*	1.15531
chr1	236039814	236059813	20000	*	1.09082
chr1	236169814	236174813	5000	*	1.22074
chr1	237904813	237909812	5000	*	1.14299
chr1	239194812	239199811	5000	*	1.03254
chr1	239749811	239754810	5000	*	1.43192
chr1	240254811	240264810	10000	*	1.07094
chr1	240279811	240289810	10000	*	1.33508
chr1	240449811	240464810	15000	*	1.20925
chr1	240764811	240769810	5000	*	1.02198
chr1	240954810	240959809	5000	*	1.09258
chr1	241439810	241444809	5000	*	1.16169
chr1	242604809	242609808	5000	*	1.05142
chr1	242984809	242989808	5000	*	1.08552
chr1	243314808	243324807	10000	*	1.03995
chr1	244259808	244264807	5000	*	1.00454
chr1	244569807	244579806	10000	*	1.19985
chr1	245004807	245009806	5000	*	1.33347
chr1	246754806	246769805	15000	*	1.00188
chr1	247119805	247124804	5000	*	1.53977
chr1	247824805	247834804	10000	*	1.00165
chr1	248284805	248299804	15000	*	1.25897
chr1	248379804	248384803	5000	*	1.22457
chr1	248419804	248429803	10000	*	1.49931
chr2	1188381	1218380	30000	*	1.213
chr2	2003380	2008379	5000	*	1.30992
chr2	3378379	3388378	10000	*	1.14023
chr2	3933379	3943378	10000	*	1.89729
chr2	4513378	4518377	5000	*	1.01943
chr2	4713378	4733377	20000	*	1.15714
chr2	5733377	5773376	40000	*	1.20756
chr2	6528377	6538376	10000	*	1.29425
chr2	6558377	6568376	10000	*	1.12131
chr2	7828376	7833375	5000	*	1.04949
chr2	8008376	8013375	5000	*	1.2621
chr2	8833375	8843374	10000	*	1.04033
chr2	9078375	9083374	5000	*	1.67369
chr2	9273375	9283374	10000	*	1.38272
chr2	9418375	9428374	10000	*	1.12749
chr2	11118373	11123372	5000	*	1.29885
chr2	12313372	12323371	10000	*	1.06181
chr2	16208369	16238368	30000	*	1.00354
chr2	16263369	16268368	5000	*	1.06297
chr2	17373368	17378367	5000	*	1.07806
chr2	17683368	17688367	5000	*	1.09811
chr2	19358367	19373366	15000	*	1.15106
chr2	19783366	19793365	10000	*	1.22427
chr2	21788365	21808364	20000	*	1.38619
chr2	23063364	23068363	5000	*	1.0094
chr2	24468363	24478362	10000	*	1.59323
chr2	28593359	28598358	5000	*	1.27122
chr2	32093357	32098356	5000	*	1.26894
chr2	34103355	34113354	10000	*	1.02584
chr2	34823354	34838353	15000	*	1.15731
chr2	36048353	36053352	5000	*	1.20635
chr2	36173353	36178352	5000	*	1.02641
chr2	36378353	36383352	5000	*	1.02717
chr2	36568353	36578352	10000	*	1.55856
chr2	36908353	36918352	10000	*	1.04072
chr2	37153353	37178352	25000	*	1.15727
chr2	37273352	37283351	10000	*	2.04686
chr2	37333352	37338351	5000	*	1.11812
chr2	37913352	37918351	5000	*	1.00419
chr2	38488351	38513350	25000	*	1.04526
chr2	41123349	41138348	15000	*	1.02322
chr2	42563348	42568347	5000	*	1.0505
chr2	43138348	43148347	10000	*	1.06084
chr2	43168348	43178347	10000	*	1.11462
chr2	44053347	44063346	10000	*	1.08532
chr2	44118347	44133346	15000	*	1.14051
chr2	44568347	44573346	5000	*	1.16671
chr2	44583347	44598346	15000	*	1.08124
chr2	45118346	45133345	15000	*	1.06602
chr2	45578346	45583345	5000	*	1.04297
chr2	46193345	46198344	5000	*	1.89952
chr2	46423345	46428344	5000	*	1.02343
chr2	46473345	46483344	10000	*	1.3842
chr2	48978343	48983342	5000	*	1.09502
chr2	49883342	49893341	10000	*	1.08366
chr2	50093342	50098341	5000	*	1.04882
chr2	50753342	50758341	5000	*	1.17438
chr2	51043342	51053341	10000	*	1.23855
chr2	51708341	51718340	10000	*	1.01816
chr2	52613340	52618339	5000	*	1.2668
chr2	53093340	53098339	5000	*	1.18665
chr2	53278340	53288339	10000	*	1.13633
chr2	53328340	53333339	5000	*	1.06218
chr2	53713339	53728338	15000	*	1.46489
chr2	54463339	54473338	10000	*	1.12375
chr2	54723339	54738338	15000	*	1.00089
chr2	55293338	55298337	5000	*	1.49531
chr2	56088338	56098337	10000	*	1.31442
chr2	58693335	58703334	10000	*	1.04985
chr2	59023335	59033334	10000	*	1.09705
chr2	59193335	59198334	5000	*	1.08479
chr2	60663334	60668333	5000	*	1.00888
chr2	60828334	60843333	15000	*	1.10367
chr2	60923334	60943333	20000	*	1.08803
chr2	61113334	61123333	10000	*	1.01903
chr2	64063331	64068330	5000	*	1.10855
chr2	64088331	64103330	15000	*	1.04409
chr2	64938331	64953329	14999	*	1.29876
chr2	67293329	67298328	5000	*	1.15255
chr2	67763328	67768327	5000	*	1.46804
chr2	68078328	68083327	5000	*	1.10192
chr2	68083328	68108327	25000	*	1.21522
chr2	68398328	68403327	5000	*	1.00427
chr2	70198326	70203325	5000	*	1.11362
chr2	70543326	70553325	10000	*	1.06746
chr2	73633324	73658323	25000	*	1.00094
chr2	73783323	73788322	5000	*	1.05958
chr2	74648323	74653322	5000	*	1.14771
chr2	76643321	76648320	5000	*	1.05416
chr2	78138320	78143319	5000	*	1.04993
chr2	78318320	78333319	15000	*	1.10786
chr2	78813319	78828318	15000	*	1.15344
chr2	78953319	78958318	5000	*	1.21396
chr2	79158319	79163318	5000	*	1.32902
chr2	79813319	79818318	5000	*	1.00466
chr2	81123318	81133317	10000	*	1.03259
chr2	82218317	82233316	15000	*	1.00903
chr2	83223316	83238315	15000	*	1.06671
chr2	84098315	84118314	20000	*	1.00088
chr2	84553315	84563314	10000	*	1.25556
chr2	85363314	85368313	5000	*	1.23294
chr2	94193307	94198306	5000	*	1.19807
chr2	95253306	95258305	5000	*	1.10113
chr2	96683305	96688304	5000	*	1.06874
chr2	98288304	98293303	5000	*	1.2571
chr2	98698304	98703303	5000	*	1.13422
chr2	100023303	100033302	10000	*	1.08165
chr2	100423302	100443301	20000	*	1.25011
chr2	100898302	100918301	20000	*	1.0398
chr2	101663301	101668300	5000	*	1.07961
chr2	103793300	103798299	5000	*	1.18244
chr2	105358298	105383297	25000	*	1.1371
chr2	105718298	105723297	5000	*	1.04588
chr2	105928298	105933297	5000	*	1.10364
chr2	107138297	107148296	10000	*	1.20035
chr2	107678297	107683296	5000	*	1.18671
chr2	110118295	110133294	15000	*	1.00641
chr2	111173294	111178293	5000	*	1.36275
chr2	112448293	112453292	5000	*	1.04191
chr2	112743293	112763292	20000	*	1.21677
chr2	114508291	114518290	10000	*	1.01656
chr2	114568291	114573290	5000	*	1.23062
chr2	115143291	115148290	5000	*	1.28306
chr2	115823290	115833289	10000	*	1.14082
chr2	116593290	116598289	5000	*	1.27463
chr2	116763289	116768288	5000	*	1.13517
chr2	116958289	116963288	5000	*	1.36273
chr2	117123289	117133288	10000	*	1.08697
chr2	117188289	117193288	5000	*	1.02827
chr2	117203289	117213288	10000	*	1.57381
chr2	118398288	118403287	5000	*	1.00917
chr2	118573288	118583287	10000	*	1.01236
chr2	118658288	118673287	15000	*	1.15701
chr2	118813288	118818287	5000	*	1.08204
chr2	119333287	119338286	5000	*	1.01987
chr2	119883287	119888286	5000	*	1.0294
chr2	120273287	120283286	10000	*	1.5991
chr2	120463286	120468285	5000	*	1.01771
chr2	121303286	121308285	5000	*	1.03537
chr2	121463286	121468285	5000	*	1.49675
chr2	121798285	121808284	10000	*	1.27197
chr2	124783283	124788282	5000	*	1.03709
chr2	125408283	125423282	15000	*	1.19242
chr2	126008282	126013281	5000	*	1.22747
chr2	126388282	126393281	5000	*	1.0744
chr2	126693282	126698281	5000	*	1.05116
chr2	127028281	127033280	5000	*	1.1285
chr2	127333281	127343280	10000	*	1.02081
chr2	127473281	127483280	10000	*	1.23277
chr2	128218280	128223279	5000	*	1.2369
chr2	128238280	128243279	5000	*	1.53629
chr2	129183280	129198279	15000	*	1.16663
chr2	130178279	130183278	5000	*	1.26407
chr2	131173278	131178277	5000	*	1.03362
chr2	132718277	132728276	10000	*	1.0689
chr2	133398276	133403275	5000	*	1.01843
chr2	133663276	133673275	10000	*	1.0177
chr2	133678276	133688275	10000	*	1.11738
chr2	133918276	133928275	10000	*	1.12296
chr2	134113276	134123275	10000	*	1.18526
chr2	134663275	134673274	10000	*	1.093
chr2	135018275	135023274	5000	*	1.09871
chr2	135283275	135288274	5000	*	1.20842
chr2	138608272	138613271	5000	*	1.41389
chr2	138878272	138888271	10000	*	1.16147
chr2	140613270	140618269	5000	*	1.01787
chr2	140753270	140758269	5000	*	1.17077
chr2	141223270	141228269	5000	*	1.12183
chr2	142898269	142903268	5000	*	1.12378
chr2	143078269	143088268	10000	*	1.60055
chr2	143773268	143793267	20000	*	1.2072
chr2	144253268	144258267	5000	*	1.00515
chr2	144383267	144388266	5000	*	1.4958
chr2	144698267	144713266	15000	*	1.04592
chr2	144873267	144883266	10000	*	1.38459
chr2	145713266	145718265	5000	*	1.28679
chr2	146103266	146108265	5000	*	1.14636
chr2	146108266	146128265	20000	*	1.07512
chr2	147098265	147103264	5000	*	1.34918
chr2	148143265	148168263	24999	*	1.02163
chr2	148783264	148788263	5000	*	1.08702
chr2	149013264	149023263	10000	*	1.09852
chr2	149413263	149418262	5000	*	1.27637
chr2	151268262	151273261	5000	*	1.14209
chr2	152028261	152043260	15000	*	1.20543
chr2	153048261	153053260	5000	*	1.19061
chr2	153888260	153893259	5000	*	1.04453
chr2	154023260	154033259	10000	*	1.04472
chr2	155058259	155068258	10000	*	1.30668
chr2	156463258	156468257	5000	*	1.08233
chr2	156543258	156548257	5000	*	1.19032
chr2	157338257	157343256	5000	*	1.1819
chr2	157588257	157613256	25000	*	1.31312
chr2	157893257	157903256	10000	*	1.361
chr2	158358256	158368255	10000	*	1.52196
chr2	158668256	158678255	10000	*	1.07829
chr2	158858256	158863255	5000	*	1.12499
chr2	159923255	159928254	5000	*	1.33556
chr2	160168255	160173254	5000	*	1.52063
chr2	160493255	160498254	5000	*	1.03084
chr2	162303253	162308252	5000	*	1.03895
chr2	163118253	163143252	25000	*	1.0512
chr2	164873251	164888250	15000	*	1.02921
chr2	166028250	166033249	5000	*	1.04127
chr2	167138249	167143248	5000	*	1.05999
chr2	168063249	168068248	5000	*	1.07074
chr2	168183249	168188248	5000	*	1.04009
chr2	168778248	168783247	5000	*	1.33489
chr2	169023248	169028247	5000	*	1.23173
chr2	169053248	169058247	5000	*	1.00444
chr2	169283248	169318247	35000	*	1.06079
chr2	169343248	169348247	5000	*	1.12653
chr2	169358248	169383247	25000	*	1.30554
chr2	169433248	169438247	5000	*	1.09533
chr2	169718247	169723246	5000	*	1.10103
chr2	169808247	169818246	10000	*	1.27149
chr2	170478247	170483246	5000	*	1.27755
chr2	170533247	170538246	5000	*	1.03282
chr2	171073246	171083245	10000	*	1.13129
chr2	171608246	171623245	15000	*	1.32968
chr2	171748246	171763245	15000	*	1.02296
chr2	172183245	172188244	5000	*	1.31282
chr2	172208245	172218244	10000	*	1.01134
chr2	172363245	172368244	5000	*	1.0768
chr2	172673245	172678244	5000	*	1.0297
chr2	175453243	175458242	5000	*	1.54616
chr2	175758243	175763242	5000	*	1.6805
chr2	176193242	176198241	5000	*	1.03369
chr2	176473242	176513241	40000	*	1.20365
chr2	176713242	176718241	5000	*	1.01077
chr2	177023242	177033241	10000	*	1.12546
chr2	177548241	177553240	5000	*	1.02655
chr2	178038241	178048240	10000	*	1.34731
chr2	178633240	178638239	5000	*	1.15833
chr2	179368240	179378239	10000	*	1.17711
chr2	179648240	179668238	19999	*	1.52476
chr2	180758239	180768238	10000	*	1.31634
chr2	181933238	181948237	15000	*	1.27237
chr2	182193237	182198236	5000	*	1.00963
chr2	183468236	183493235	25000	*	1.05818
chr2	184828235	184848234	20000	*	1.46655
chr2	187008234	187013233	5000	*	1.25431
chr2	187503233	187513232	10000	*	1.03183
chr2	187718233	187723232	5000	*	1.12183
chr2	187753233	187758232	5000	*	1.19494
chr2	188038233	188048232	10000	*	1.13004
chr2	188788232	188803231	15000	*	1.18529
chr2	190023231	190028230	5000	*	1.04784
chr2	190733231	190738230	5000	*	1.04066
chr2	191623230	191628229	5000	*	1.04761
chr2	193068229	193073228	5000	*	1.1447
chr2	193088229	193093228	5000	*	1.20929
chr2	193368229	193373228	5000	*	1.11319
chr2	193403229	193413228	10000	*	1.15092
chr2	193693228	193698227	5000	*	1.38091
chr2	193738228	193743227	5000	*	1.3227
chr2	194103228	194108227	5000	*	1.27344
chr2	194123228	194128227	5000	*	1.14232
chr2	194463228	194473227	10000	*	1.03436
chr2	194863227	194868226	5000	*	1.13153
chr2	194958227	194968226	10000	*	1.19171
chr2	195268227	195273226	5000	*	1.18941
chr2	195288227	195298226	10000	*	1.01826
chr2	196278226	196283225	5000	*	1.11165
chr2	196488226	196513225	25000	*	1.00572
chr2	197113226	197123225	10000	*	1.57242
chr2	199283224	199303223	20000	*	1.09873
chr2	199518224	199523223	5000	*	1.50521
chr2	200768223	200773222	5000	*	1.04896
chr2	201083223	201088222	5000	*	1.03603
chr2	202953221	202958220	5000	*	1.04767
chr2	203038221	203043220	5000	*	1.02251
chr2	203358221	203363220	5000	*	1.01858
chr2	203393221	203403220	10000	*	1.17854
chr2	203793220	203813219	20000	*	1.13054
chr2	204228220	204233219	5000	*	1.00036
chr2	204348220	204353219	5000	*	1.22947
chr2	206408218	206413217	5000	*	1.05657
chr2	207278218	207283217	5000	*	1.16663
chr2	207578217	207588216	10000	*	1.80774
chr2	208198217	208203216	5000	*	1.19183
chr2	208968216	208978215	10000	*	1.03995
chr2	209443216	209453215	10000	*	1.23001
chr2	209928215	209938214	10000	*	1.04173
chr2	210538215	210543214	5000	*	1.01727
chr2	211258214	211263213	5000	*	1.24574
chr2	213693213	213708211	14999	*	1.20192
chr2	213958212	213968211	10000	*	1.12015
chr2	214868212	214883211	15000	*	1.15748
chr2	215263211	215268210	5000	*	1.01821
chr2	215463211	215468210	5000	*	1.38282
chr2	215738211	215743210	5000	*	1.02393
chr2	215848211	215868210	20000	*	1.38261
chr2	216018211	216028210	10000	*	1.16662
chr2	216758210	216763209	5000	*	1.02162
chr2	216973210	216988209	15000	*	1.16414
chr2	217543209	217563208	20000	*	1.16414
chr2	217878209	217883208	5000	*	1.01353
chr2	218043209	218048208	5000	*	1.05362
chr2	218918208	218928207	10000	*	1.05217
chr2	219838208	219853207	15000	*	1.64448
chr2	219938208	219943207	5000	*	1.07687
chr2	220518207	220523206	5000	*	1.06951
chr2	222238206	222243205	5000	*	1.24219
chr2	223633205	223638204	5000	*	1.17105
chr2	224283204	224298203	15000	*	1.09647
chr2	224323204	224328203	5000	*	1.07392
chr2	225813203	225818202	5000	*	1.07226
chr2	226173203	226188202	15000	*	1.12628
chr2	226748202	226758201	10000	*	1.4584
chr2	227958201	227963200	5000	*	1.01299
chr2	228778201	228783200	5000	*	1.56399
chr2	229033200	229043199	10000	*	1.10735
chr2	229883200	229888199	5000	*	1.47278
chr2	230163199	230173198	10000	*	1.11279
chr2	231028199	231038198	10000	*	1.11549
chr2	232483198	232503197	20000	*	1.24441
chr2	233168197	233173196	5000	*	1.03214
chr2	233253197	233258196	5000	*	1.15287
chr2	233513197	233518196	5000	*	1.21405
chr2	234078196	234093195	15000	*	1.01971
chr2	234613196	234633195	20000	*	1.0126
chr2	234868196	234883195	15000	*	1.001
chr2	236053195	236063194	10000	*	1.0981
chr2	237503194	237528193	25000	*	1.05589
chr2	238333193	238343192	10000	*	1.16104
chr2	238498193	238503192	5000	*	1.55805
chr2	239163192	239168191	5000	*	1.17005
chr2	240198191	240203190	5000	*	1.28152
chr2	240373191	240378190	5000	*	1.07969
chr3	1809659	1814658	5000	*	1.61402
chr3	2034659	2049658	15000	*	1.3041
chr3	2159659	2174658	15000	*	1.02067
chr3	2544659	2549658	5000	*	1.0527
chr3	5074657	5079656	5000	*	1.1564
chr3	5979656	5994655	15000	*	1.02836
chr3	6249656	6254655	5000	*	1.15442
chr3	6759656	6764655	5000	*	1.02336
chr3	6849655	6859654	10000	*	1.02428
chr3	7119655	7129654	10000	*	1.05461
chr3	7249655	7274654	25000	*	1.23206
chr3	9159654	9164653	5000	*	1.06342
chr3	9404653	9409652	5000	*	1.0577
chr3	9724653	9739652	15000	*	1.48888
chr3	10634652	10639651	5000	*	1.2716
chr3	10839652	10849651	10000	*	1.14989
chr3	10859652	10864651	5000	*	1.06851
chr3	11099652	11104651	5000	*	1.33267
chr3	11174652	11179651	5000	*	1.32933
chr3	11349652	11364651	15000	*	1.03128
chr3	11919651	11929650	10000	*	1.25252
chr3	13704650	13719649	15000	*	1.14123
chr3	13914650	13929649	15000	*	1.01239
chr3	14299650	14309649	10000	*	1.0982
chr3	14309650	14324649	15000	*	1.25496
chr3	15124649	15134648	10000	*	1.23026
chr3	15909648	15914647	5000	*	1.00413
chr3	16079648	16084647	5000	*	1.07641
chr3	16474648	16484647	10000	*	1.3079
chr3	17069647	17079646	10000	*	1.13356
chr3	18539646	18544645	5000	*	1.19612
chr3	18624646	18634645	10000	*	1.05426
chr3	19414645	19419644	5000	*	1.10808
chr3	19624645	19629644	5000	*	1.00741
chr3	19779645	19784644	5000	*	1.27825
chr3	19844645	19849644	5000	*	1.05788
chr3	21229644	21244643	15000	*	1.60634
chr3	21384644	21424643	40000	*	1.14276
chr3	22119643	22124642	5000	*	1.03931
chr3	22579643	22584642	5000	*	1.27274
chr3	23379642	23384641	5000	*	1.5741
chr3	23819642	23824641	5000	*	1.03592
chr3	24199642	24209641	10000	*	1.07149
chr3	25014641	25019640	5000	*	1.05486
chr3	26044640	26059639	15000	*	1.05644
chr3	26674640	26684639	10000	*	1.06299
chr3	26709640	26714639	5000	*	1.00059
chr3	26814640	26819639	5000	*	1.23978
chr3	27874639	27879638	5000	*	1.72792
chr3	28599638	28604637	5000	*	1.04555
chr3	29164638	29189637	25000	*	1.03442
chr3	30304637	30309636	5000	*	1.04484
chr3	32219635	32224634	5000	*	1.4602
chr3	34554633	34569632	15000	*	1.09792
chr3	35089633	35094632	5000	*	1.1814
chr3	36234632	36249631	15000	*	1.01353
chr3	36529632	36549631	20000	*	1.29353
chr3	36669632	36679631	10000	*	1.25912
chr3	36694632	36704631	10000	*	1.17858
chr3	37284631	37294630	10000	*	1.01987
chr3	37669631	37689630	20000	*	1.03815
chr3	37859631	37869630	10000	*	1.04009
chr3	38004631	38009630	5000	*	1.07893
chr3	38704630	38709629	5000	*	1.4102
chr3	39159630	39164629	5000	*	1.02429
chr3	40154629	40159628	5000	*	1.16895
chr3	41059628	41064627	5000	*	1.18302
chr3	41584628	41589627	5000	*	1.11072
chr3	41989628	41994627	5000	*	1.00361
chr3	42009628	42039627	30000	*	1.00614
chr3	42494627	42509626	15000	*	1.07665
chr3	43094627	43099626	5000	*	1.27389
chr3	43859626	43869625	10000	*	1.22559
chr3	44579626	44584625	5000	*	1.08243
chr3	44689625	44704624	15000	*	1.20178
chr3	45794625	45799624	5000	*	1.0465
chr3	47854623	47864622	10000	*	1.30313
chr3	48134623	48144622	10000	*	1.42655
chr3	48884622	48894621	10000	*	1.08296
chr3	48909622	48914621	5000	*	1.02952
chr3	49089622	49099621	10000	*	1.10984
chr3	49439622	49444621	5000	*	1.31712
chr3	50029621	50034620	5000	*	1.01322
chr3	50069621	50074620	5000	*	1.05703
chr3	51479620	51484619	5000	*	1.02609
chr3	53434619	53439618	5000	*	1.00275
chr3	53439619	53449617	9999	*	1.03784
chr3	53544618	53549617	5000	*	1.00855
chr3	53899618	53909617	10000	*	1.04665
chr3	54594618	54604617	10000	*	1.09992
chr3	55104617	55109616	5000	*	1.30775
chr3	55159617	55164616	5000	*	1.06485
chr3	59489614	59494613	5000	*	1.16906
chr3	61024612	61034611	10000	*	1.1654
chr3	61294612	61299611	5000	*	1.02599
chr3	61379612	61404611	25000	*	1.05561
chr3	62564611	62574610	10000	*	1.11021
chr3	62624611	62629610	5000	*	1.12865
chr3	62644611	62649610	5000	*	1.08376
chr3	63074611	63084610	10000	*	1.23791
chr3	64039610	64044609	5000	*	1.32672
chr3	69059606	69094605	35000	*	1.29248
chr3	69834606	69839604	4999	*	1.16593
chr3	71369604	71374603	5000	*	1.13617
chr3	71564604	71569603	5000	*	1.34669
chr3	71614604	71619603	5000	*	1.30899
chr3	72769603	72779602	10000	*	1.44417
chr3	72994603	73004602	10000	*	1.05852
chr3	74049602	74054601	5000	*	1.16619
chr3	74599602	74609601	10000	*	1.00172
chr3	75049601	75054600	5000	*	1.29234
chr3	75804601	75809600	5000	*	1.09193
chr3	75809601	75814600	5000	*	1.18542
chr3	76224600	76229599	5000	*	1.02309
chr3	76344600	76354599	10000	*	1.21761
chr3	78359599	78364598	5000	*	1.20498
chr3	79394598	79399597	5000	*	1.08894
chr3	79404598	79409597	5000	*	1.5413
chr3	79749598	79754597	5000	*	1.27379
chr3	79879598	79884597	5000	*	1.30775
chr3	80319597	80324596	5000	*	1.1032
chr3	80704597	80709596	5000	*	1.2411
chr3	80964597	80969596	5000	*	1.1561
chr3	81484596	81489595	5000	*	1.07509
chr3	83964594	83969593	5000	*	1.09896
chr3	84094594	84104593	10000	*	1.10584
chr3	84624594	84629593	5000	*	1.07793
chr3	84704594	84709593	5000	*	1.05839
chr3	85049593	85064592	15000	*	1.03895
chr3	86294592	86299591	5000	*	1.26665
chr3	87254592	87259591	5000	*	1.03087
chr3	87454592	87469591	15000	*	1.16536
chr3	87744591	87749590	5000	*	1.36274
chr3	87969591	87979590	10000	*	1.14768
chr3	88534591	88544590	10000	*	1.0403
chr3	88684591	88689590	5000	*	1.3339
chr3	88919590	88939589	20000	*	1.24907
chr3	89339590	89344589	5000	*	1.18026
chr3	89499590	89504589	5000	*	1.17583
chr3	90669589	90679588	10000	*	1.16516
chr3	93859586	93864585	5000	*	1.14803
chr3	94294586	94299585	5000	*	1.02487
chr3	95039586	95049584	9999	*	1.17181
chr3	95369585	95379584	10000	*	1.03846
chr3	97079584	97084583	5000	*	1.09816
chr3	97139584	97149583	10000	*	1.07665
chr3	98049583	98059582	10000	*	1.48798
chr3	98854582	98859581	5000	*	1.25766
chr3	99179582	99189581	10000	*	1.17404
chr3	100234581	100244580	10000	*	1.02105
chr3	101529580	101544579	15000	*	1.09713
chr3	102779579	102784578	5000	*	1.07482
chr3	103324579	103339578	15000	*	1.16104
chr3	103369579	103374578	5000	*	1.19107
chr3	103449579	103459578	10000	*	1.04636
chr3	104839578	104844577	5000	*	1.21079
chr3	106569576	106574575	5000	*	1.26777
chr3	107539576	107549575	10000	*	1.18941
chr3	108109575	108129574	20000	*	1.08606
chr3	110989573	110994572	5000	*	1.1363
chr3	111574572	111579571	5000	*	1.13997
chr3	112164572	112184571	20000	*	1.04602
chr3	112409572	112414571	5000	*	1.05264
chr3	113619571	113629570	10000	*	1.19756
chr3	113849571	113864570	15000	*	1.1288
chr3	114629570	114639569	10000	*	1.09818
chr3	115634569	115649568	15000	*	1.03921
chr3	116269569	116274568	5000	*	1.03485
chr3	117169568	117174567	5000	*	1.15132
chr3	117259568	117269567	10000	*	1.2143
chr3	119114566	119119565	5000	*	1.25682
chr3	119524566	119534565	10000	*	1.03391
chr3	121629564	121649563	20000	*	1.03147
chr3	122804563	122809562	5000	*	1.21858
chr3	124424562	124429561	5000	*	1.06297
chr3	125419561	125434560	15000	*	1.04718
chr3	125799561	125809560	10000	*	1.1365
chr3	126049561	126054560	5000	*	1.10796
chr3	126999560	127004559	5000	*	1.03594
chr3	128389559	128394558	5000	*	1.03904
chr3	128989559	128999558	10000	*	1.07594
chr3	132659556	132664555	5000	*	1.5578
chr3	133844555	133849554	5000	*	1.04734
chr3	134104555	134109554	5000	*	1.10176
chr3	134844554	134849553	5000	*	1.21189
chr3	136014553	136019552	5000	*	1.08237
chr3	136104553	136124552	20000	*	1.02316
chr3	137079552	137084551	5000	*	1.02302
chr3	137814552	137834551	20000	*	1.15564
chr3	139119551	139129550	10000	*	1.09146
chr3	139219550	139224549	5000	*	1.54157
chr3	140264550	140269549	5000	*	1.47044
chr3	141244549	141259548	15000	*	1.24614
chr3	144029547	144034546	5000	*	1.22779
chr3	144539546	144544545	5000	*	1.25946
chr3	144774546	144784545	10000	*	1.17827
chr3	145319546	145324545	5000	*	1.34967
chr3	146239545	146259544	20000	*	1.03389
chr3	147284544	147289543	5000	*	1.02611
chr3	147604544	147614543	10000	*	1.16976
chr3	147629544	147634543	5000	*	1.08862
chr3	149114543	149124542	10000	*	1.25673
chr3	149214543	149219542	5000	*	1.24049
chr3	150509542	150519540	9999	*	1.23108
chr3	150734541	150744540	10000	*	1.19568
chr3	151229541	151239540	10000	*	1.09767
chr3	151839540	151844539	5000	*	1.04613
chr3	152099540	152109539	10000	*	1.52373
chr3	152689540	152694539	5000	*	1.065
chr3	152904540	152914539	10000	*	1.00479
chr3	153044539	153049538	5000	*	1.05995
chr3	155574537	155579536	5000	*	1.60571
chr3	155944537	155949536	5000	*	1.08443
chr3	157239536	157249535	10000	*	1.03688
chr3	159699534	159704533	5000	*	1.09946
chr3	159724534	159739533	15000	*	1.21924
chr3	161999532	162009531	10000	*	1.41911
chr3	162759532	162769531	10000	*	1.03639
chr3	163114532	163139530	24999	*	1.03058
chr3	164329531	164334530	5000	*	1.11154
chr3	164684530	164699529	15000	*	1.97639
chr3	165089530	165094529	5000	*	1.10085
chr3	165109530	165119529	10000	*	1.08325
chr3	167249528	167264527	15000	*	1.27525
chr3	167589528	167604527	15000	*	1.24705
chr3	168419527	168424526	5000	*	1.08704
chr3	170459526	170464525	5000	*	1.38682
chr3	170789525	170794524	5000	*	1.00699
chr3	170899525	170904524	5000	*	1.00053
chr3	171594525	171604524	10000	*	1.797
chr3	171894525	171904524	10000	*	1.0871
chr3	171914525	171919524	5000	*	1.23847
chr3	172099524	172104523	5000	*	1.11124
chr3	172959524	172964523	5000	*	1.1066
chr3	175769521	175779520	10000	*	1.35431
chr3	175974521	175984520	10000	*	1.00924
chr3	178724519	178739518	15000	*	1.03616
chr3	180014518	180024517	10000	*	1.13423
chr3	185294514	185304513	10000	*	2.14543
chr3	186214513	186219512	5000	*	1.03039
chr3	188789511	188794510	5000	*	1.36481
chr3	189249511	189259510	10000	*	1.00941
chr3	189469511	189479510	10000	*	1.05456
chr3	194224507	194229506	5000	*	1.13144
chr3	194314507	194324506	10000	*	1.02975
chr3	196314505	196329504	15000	*	1.05672
chr4	1278944	1283943	5000	*	1.25057
chr4	4628941	4638940	10000	*	1.0214
chr4	4638941	4643940	5000	*	1.00667
chr4	5093941	5098940	5000	*	1.08261
chr4	5218940	5223939	5000	*	1.06229
chr4	6373940	6393939	20000	*	1.08566
chr4	6553939	6563938	10000	*	1.03101
chr4	8523938	8528937	5000	*	1.06564
chr4	10263936	10273935	10000	*	1.31377
chr4	15193933	15203932	10000	*	1.14481
chr4	15638932	15643931	5000	*	1.23711
chr4	16078932	16083931	5000	*	1.04901
chr4	16138932	16158931	20000	*	1.24496
chr4	16358932	16363931	5000	*	1.04895
chr4	16408932	16413931	5000	*	1.01746
chr4	16958931	16968930	10000	*	1.04297
chr4	17293931	17298930	5000	*	1.13118
chr4	22668927	22678926	10000	*	1.15527
chr4	23273926	23288925	15000	*	1.15066
chr4	23558926	23578925	20000	*	1.09725
chr4	24588925	24593924	5000	*	1.13348
chr4	25808924	25818923	10000	*	1.06467
chr4	27248923	27268922	20000	*	1.24821
chr4	29998921	30003920	5000	*	1.22559
chr4	30388920	30398919	10000	*	1.0453
chr4	31768919	31773918	5000	*	1.54295
chr4	32468919	32478918	10000	*	1.04708
chr4	33403918	33408917	5000	*	1.25733
chr4	33868918	33873917	5000	*	1.02056
chr4	34463917	34468916	5000	*	1.03259
chr4	34603917	34608916	5000	*	1.01292
chr4	35913916	35923915	10000	*	1.97639
chr4	35923916	35928915	5000	*	1.42655
chr4	35928916	35933915	5000	*	1.32609
chr4	39173914	39178913	5000	*	1.1641
chr4	41338912	41343911	5000	*	1.07829
chr4	41483912	41488911	5000	*	1.19221
chr4	41823911	41828910	5000	*	1.04751
chr4	42768911	42778910	10000	*	1.61199
chr4	43268910	43303909	35000	*	1.02567
chr4	43933910	43938909	5000	*	1.22093
chr4	47118907	47123906	5000	*	1.06317
chr4	55953900	55958899	5000	*	1.11066
chr4	58663898	58688897	25000	*	1.26215
chr4	58853898	58858897	5000	*	1.08878
chr4	59038898	59068897	30000	*	1.0699
chr4	59958897	59963896	5000	*	1.04435
chr4	62258895	62263894	5000	*	1.01817
chr4	63143895	63148894	5000	*	1.00838
chr4	83673878	83678877	5000	*	1.04673
chr4	87198875	87208874	10000	*	1.97639
chr4	87953875	87958874	5000	*	1.10434
chr4	91343872	91348871	5000	*	1.2706
chr4	91558872	91568871	10000	*	1.05167
chr4	93413871	93418869	4999	*	1.50119
chr4	93633870	93638869	5000	*	1.05035
chr4	93683870	93688869	5000	*	1.05035
chr4	95428869	95433868	5000	*	1.02202
chr4	96738868	96743867	5000	*	1.10632
chr4	96848868	96853867	5000	*	1.03522
chr4	97803867	97808866	5000	*	1.19159
chr4	98468866	98473865	5000	*	1.05693
chr4	101063864	101088863	25000	*	1.32179
chr4	101503864	101518863	15000	*	1.30825
chr4	101658864	101673863	15000	*	1.30748
chr4	102038864	102043863	5000	*	1.00072
chr4	103298863	103308862	10000	*	1.03707
chr4	103513862	103518861	5000	*	1.52317
chr4	104198862	104203861	5000	*	1.13421
chr4	104438862	104443861	5000	*	1.0852
chr4	105703861	105748860	45000	*	1.2095
chr4	105878861	105883860	5000	*	1.3351
chr4	106163860	106168859	5000	*	1.56399
chr4	106178860	106183859	5000	*	1.42757
chr4	106288860	106293859	5000	*	1.43199
chr4	106438860	106443859	5000	*	1.27525
chr4	106463860	106468859	5000	*	1.05781
chr4	106473860	106478859	5000	*	1.06427
chr4	106608860	106633859	25000	*	1.27525
chr4	106643860	106658859	15000	*	1.31413
chr4	106698860	106708859	10000	*	1.34855
chr4	106708860	106728859	20000	*	1.13792
chr4	107158860	107163859	5000	*	1.08301
chr4	107238860	107243859	5000	*	1.04652
chr4	107828859	107843858	15000	*	1.0592
chr4	108948858	108973857	25000	*	1.17633
chr4	109578858	109583857	5000	*	1.0108
chr4	109863857	109878856	15000	*	1.19164
chr4	110138857	110143856	5000	*	1.46143
chr4	110383857	110388856	5000	*	1.18861
chr4	110688857	110693856	5000	*	1.12251
chr4	111033857	111038856	5000	*	1.00934
chr4	111938856	111953855	15000	*	1.04895
chr4	113233855	113248854	15000	*	1.02251
chr4	113718854	113723853	5000	*	1.12287
chr4	114018854	114028853	10000	*	1.00838
chr4	114838854	114843853	5000	*	1.05968
chr4	115088853	115123852	35000	*	1.07453
chr4	115158853	115173852	15000	*	1.4047
chr4	118123851	118128850	5000	*	1.22706
chr4	118918850	118938849	20000	*	1.06922
chr4	119463850	119468849	5000	*	1.00711
chr4	120993849	120998848	5000	*	1.04721
chr4	121038849	121043848	5000	*	1.1484
chr4	122798847	122803846	5000	*	1.05807
chr4	124963845	124973844	10000	*	1.12704
chr4	125273845	125283844	10000	*	1.06681
chr4	125478845	125483844	5000	*	1.02408
chr4	127798843	127803842	5000	*	1.03265
chr4	129053842	129068841	15000	*	1.03671
chr4	132528839	132533838	5000	*	1.01793
chr4	133368839	133383838	15000	*	1.11218
chr4	133428839	133433838	5000	*	1.01391
chr4	140723833	140733832	10000	*	1.78488
chr4	142783831	142798830	15000	*	1.30809
chr4	143688831	143703830	15000	*	1.02531
chr4	144198830	144208829	10000	*	1.16399
chr4	144763830	144773829	10000	*	1.07628
chr4	145113829	145118828	5000	*	1.33372
chr4	145288829	145298828	10000	*	1.02973
chr4	145838829	145848828	10000	*	1.00342
chr4	146918828	146933827	15000	*	1.18294
chr4	147183828	147188827	5000	*	1.10044
chr4	148543827	148548826	5000	*	1.39335
chr4	148978826	148983825	5000	*	1.05156
chr4	149753826	149768825	15000	*	1.04928
chr4	150223825	150228824	5000	*	1.09816
chr4	150838825	150843824	5000	*	1.24759
chr4	153538823	153553822	15000	*	1.00384
chr4	154288822	154298821	10000	*	1.09899
chr4	154528822	154563821	35000	*	1.16102
chr4	156308821	156313820	5000	*	1.19433
chr4	156508820	156523819	15000	*	1.08758
chr4	156563820	156573819	10000	*	1.02163
chr4	157533820	157558819	25000	*	1.09279
chr4	158418819	158423818	5000	*	1.13895
chr4	158508819	158513818	5000	*	1.18911
chr4	158738819	158753818	15000	*	1.10666
chr4	160063818	160073817	10000	*	1.07682
chr4	160798817	160813816	15000	*	1.04613
chr4	161053817	161063816	10000	*	1.0589
chr4	161703816	161708815	5000	*	1.06563
chr4	161863816	161868815	5000	*	1.12978
chr4	162198816	162203815	5000	*	1.09461
chr4	162468816	162473815	5000	*	1.38514
chr4	162513816	162523815	10000	*	1.05986
chr4	163193815	163198814	5000	*	1.41962
chr4	164073814	164078813	5000	*	1.2765
chr4	164293814	164298813	5000	*	1.29013
chr4	164333814	164338813	5000	*	1.00046
chr4	165198814	165208813	10000	*	1.16166
chr4	165913813	165918812	5000	*	1.21384
chr4	165968813	165973812	5000	*	1.0131
chr4	167508812	167513811	5000	*	1.12851
chr4	167873811	167878810	5000	*	1.10779
chr4	170178810	170183809	5000	*	1.01901
chr4	171083809	171088808	5000	*	1.00871
chr4	173003807	173018806	15000	*	1.26467
chr4	174158806	174163805	5000	*	1.01371
chr4	176373805	176383804	10000	*	1.26753
chr4	176668804	176673803	5000	*	1.2222
chr4	176883804	176888803	5000	*	1.19494
chr4	177228804	177233803	5000	*	1.24721
chr4	177528804	177533803	5000	*	1.18367
chr4	178183803	178188802	5000	*	1.29829
chr4	178838803	178843802	5000	*	1.17247
chr4	180533801	180543800	10000	*	1.12246
chr4	180573801	180593800	20000	*	1.12316
chr4	182948799	182958798	10000	*	1.19567
chr4	186788796	186803795	15000	*	1.12292
chr4	187553796	187558795	5000	*	1.18041
chr4	188163795	188183794	20000	*	1.0276
chr4	189923794	189938793	15000	*	1.01415
chr5	559238	564237	5000	*	1.16223
chr5	1419238	1424237	5000	*	1.38533
chr5	2134237	2139236	5000	*	1.35004
chr5	3974236	3979235	5000	*	1.11763
chr5	4374235	4379234	5000	*	1.0603
chr5	4379235	4384234	5000	*	1.21819
chr5	7349233	7354232	5000	*	1.34964
chr5	7534233	7539232	5000	*	1.03183
chr5	7559233	7564232	5000	*	1.10129
chr5	8609232	8619231	10000	*	1.03167
chr5	9249231	9259230	10000	*	1.02331
chr5	9349231	9354230	5000	*	1.04424
chr5	11629229	11644228	15000	*	1.14538
chr5	14669227	14674226	5000	*	1.13444
chr5	14789227	14794226	5000	*	1.26267
chr5	15864226	15869225	5000	*	1.20464
chr5	16514226	16524225	10000	*	1.07866
chr5	16764225	16769224	5000	*	1.04436
chr5	17344225	17349224	5000	*	1.43456
chr5	17679225	17684224	5000	*	1.44849
chr5	17769225	17774224	5000	*	1.09184
chr5	20424223	20429222	5000	*	1.02449
chr5	20639222	20644221	5000	*	1.08915
chr5	21274222	21304221	30000	*	1.00733
chr5	22159221	22164220	5000	*	1.07171
chr5	22769221	22774220	5000	*	1.01741
chr5	23089220	23094219	5000	*	1.03695
chr5	24384219	24389218	5000	*	1.04392
chr5	24924219	24944218	20000	*	1.54128
chr5	25064219	25069218	5000	*	1.6903
chr5	25174219	25194218	20000	*	1.01473
chr5	25479219	25489217	9999	*	1.09505
chr5	25584218	25589217	5000	*	1.2802
chr5	25724218	25729217	5000	*	1.11913
chr5	25994218	25999217	5000	*	1.1195
chr5	26049218	26059217	10000	*	1.01381
chr5	26359218	26364217	5000	*	1.04745
chr5	26424218	26434217	10000	*	1.08156
chr5	26729218	26734217	5000	*	1.13403
chr5	26804217	26809216	5000	*	1.18586
chr5	27199217	27209216	10000	*	1.09349
chr5	27349217	27359216	10000	*	1.02879
chr5	27414217	27419216	5000	*	1.09279
chr5	27764217	27769216	5000	*	1.50823
chr5	28054216	28064215	10000	*	1.32902
chr5	28794216	28799215	5000	*	1.2577
chr5	29204216	29219215	15000	*	1.2718
chr5	29544215	29554214	10000	*	1.02006
chr5	29624215	29629214	5000	*	1.17849
chr5	29764215	29779214	15000	*	1.01375
chr5	29814215	29819214	5000	*	1.14771
chr5	30274215	30284214	10000	*	1.15232
chr5	30284215	30299214	15000	*	1.11719
chr5	30494215	30499214	5000	*	1.11894
chr5	31049214	31054213	5000	*	1.00597
chr5	31169214	31174213	5000	*	1.03068
chr5	31304214	31319213	15000	*	1.01629
chr5	31774214	31779213	5000	*	1.04925
chr5	32369213	32374212	5000	*	1.1405
chr5	32594213	32599212	5000	*	1.0417
chr5	32599213	32614212	15000	*	1.12532
chr5	32654213	32659212	5000	*	1.33508
chr5	34974211	34979210	5000	*	1.08956
chr5	36164210	36169209	5000	*	1.24937
chr5	37349209	37354208	5000	*	1.05557
chr5	37809209	37819208	10000	*	1.21874
chr5	37889209	37894208	5000	*	1.10037
chr5	38134208	38139207	5000	*	1.34802
chr5	38139208	38149207	10000	*	1.20464
chr5	38169208	38179207	10000	*	1.26059
chr5	38424208	38454207	30000	*	1.02343
chr5	38524208	38529207	5000	*	1.69369
chr5	38564208	38569207	5000	*	1.05486
chr5	38639208	38644207	5000	*	1.05584
chr5	38779208	38784207	5000	*	1.12727
chr5	39324208	39329207	5000	*	1.00143
chr5	39384207	39394206	10000	*	1.13847
chr5	39439207	39444206	5000	*	1.01821
chr5	40254207	40264206	10000	*	1.4566
chr5	40334207	40339206	5000	*	1.1699
chr5	41164206	41174205	10000	*	1.00926
chr5	42449205	42469204	20000	*	1.02429
chr5	43489204	43499203	10000	*	1.0389
chr5	44039204	44044203	5000	*	1.34413
chr5	44254204	44259203	5000	*	1.01929
chr5	45514203	45519202	5000	*	1.70721
chr5	46404202	46409201	5000	*	1.01478
chr5	51529198	51534197	5000	*	1.07107
chr5	52154197	52169196	15000	*	1.018
chr5	52259197	52264196	5000	*	1.10888
chr5	53329196	53334195	5000	*	1.10471
chr5	54259196	54264195	5000	*	1.16039
chr5	54549195	54559194	10000	*	1.05396
chr5	55099195	55109194	10000	*	1.30308
chr5	55734195	55744193	9999	*	1.08524
chr5	55884194	55889193	5000	*	1.15758
chr5	56849194	56854193	5000	*	1.0301
chr5	57044193	57054192	10000	*	1.09816
chr5	57109193	57124192	15000	*	1.3258
chr5	57299193	57304192	5000	*	1.10879
chr5	57479193	57489192	10000	*	1.04785
chr5	57679193	57684192	5000	*	1.0687
chr5	57684193	57704192	20000	*	1.24861
chr5	57824193	57839192	15000	*	1.51651
chr5	57969193	57979192	10000	*	1.12111
chr5	58604192	58609191	5000	*	1.29593
chr5	58994192	58999191	5000	*	1.05989
chr5	59869191	59874190	5000	*	1.30161
chr5	60404191	60414190	10000	*	1.26502
chr5	60434191	60444190	10000	*	1.12295
chr5	61854190	61859189	5000	*	1.03328
chr5	62189189	62194188	5000	*	1.06442
chr5	62564189	62584188	20000	*	1.37875
chr5	64059188	64074187	15000	*	1.08472
chr5	64889187	64894186	5000	*	1.00326
chr5	65014187	65019186	5000	*	1.10648
chr5	65149187	65164186	15000	*	1.07361
chr5	65259187	65264186	5000	*	1.12283
chr5	65559187	65569186	10000	*	1.12091
chr5	65759187	65764186	5000	*	1.12382
chr5	66879186	66884185	5000	*	1.18749
chr5	67479185	67494184	15000	*	1.1221
chr5	72344181	72349180	5000	*	1.02925
chr5	72484181	72489180	5000	*	1.06298
chr5	73184181	73194180	10000	*	1.06162
chr5	73229181	73249180	20000	*	1.01906
chr5	73639180	73644179	5000	*	1.20227
chr5	73864180	73874179	10000	*	1.05605
chr5	74109180	74114179	5000	*	1.07068
chr5	74509180	74524179	15000	*	1.22285
chr5	74919179	74924178	5000	*	1.29439
chr5	75384179	75389178	5000	*	1.01353
chr5	77979177	77984176	5000	*	1.10947
chr5	77999177	78004176	5000	*	1.01093
chr5	78944176	78949175	5000	*	1.01713
chr5	79064176	79069175	5000	*	1.00047
chr5	79549176	79554175	5000	*	1.06801
chr5	80019175	80029174	10000	*	1.11735
chr5	82544173	82559172	15000	*	1.1199
chr5	83114173	83119172	5000	*	1.25793
chr5	83729172	83734171	5000	*	1.47013
chr5	84134172	84139171	5000	*	1.28806
chr5	84674172	84679171	5000	*	1.26898
chr5	84809171	84819170	10000	*	1.18472
chr5	88344169	88349168	5000	*	1.14772
chr5	91079166	91089165	10000	*	1.06373
chr5	91329166	91344165	15000	*	1.40769
chr5	93679164	93684163	5000	*	1.09207
chr5	95689163	95704162	15000	*	1.00658
chr5	96884162	96904161	20000	*	1.15167
chr5	97884161	97889160	5000	*	1.12977
chr5	99664160	99674159	10000	*	1.06395
chr5	101349158	101354157	5000	*	1.37741
chr5	101864158	101869157	5000	*	1.08628
chr5	102209158	102219157	10000	*	1.14099
chr5	102364158	102374157	10000	*	1.09721
chr5	103554157	103559156	5000	*	1.06801
chr5	103639157	103644155	4999	*	1.0145
chr5	105274155	105279154	5000	*	1.08471
chr5	109209152	109219151	10000	*	1.10291
chr5	111864150	111879149	15000	*	1.19648
chr5	112984149	112989148	5000	*	1.17345
chr5	113029149	113044148	15000	*	1.22377
chr5	113519149	113524148	5000	*	1.2039
chr5	116889146	116909145	20000	*	1.21384
chr5	117534145	117539144	5000	*	1.25453
chr5	118879144	118889143	10000	*	1.18101
chr5	120534143	120539142	5000	*	1.06717
chr5	121939142	121944141	5000	*	1.01078
chr5	122254142	122269141	15000	*	1.16976
chr5	122849141	122854140	5000	*	1.06749
chr5	123479141	123484140	5000	*	1.09163
chr5	123589141	123594140	5000	*	1.11459
chr5	123634141	123639140	5000	*	1.06971
chr5	124039140	124044139	5000	*	1.08015
chr5	124064140	124069139	5000	*	1.1976
chr5	125124139	125129138	5000	*	1.20764
chr5	126254139	126264138	10000	*	1.13517
chr5	126414138	126419137	5000	*	1.09345
chr5	126979138	126984137	5000	*	1.09612
chr5	126989138	126994137	5000	*	1.52706
chr5	127089138	127104137	15000	*	1.19985
chr5	127149138	127169137	20000	*	1.12435
chr5	127514138	127524137	10000	*	1.03991
chr5	128064137	128069136	5000	*	1.13287
chr5	128409137	128414136	5000	*	1.24803
chr5	129494136	129504135	10000	*	1.13687
chr5	130254135	130259134	5000	*	1.08719
chr5	132109134	132114133	5000	*	1.28366
chr5	132909133	132914132	5000	*	1.14603
chr5	133129133	133134132	5000	*	1.17703
chr5	133864133	133869132	5000	*	1.04566
chr5	134094132	134099131	5000	*	1.22879
chr5	134149132	134159131	10000	*	1.01073
chr5	135094132	135099131	5000	*	1.04613
chr5	135169131	135174130	5000	*	1.16808
chr5	135314131	135319130	5000	*	1.02111
chr5	136054131	136059130	5000	*	1.10258
chr5	136074131	136079130	5000	*	1.18449
chr5	137054130	137059129	5000	*	1.20384
chr5	137209130	137214129	5000	*	1.02756
chr5	137334130	137339129	5000	*	1.30825
chr5	138224129	138229128	5000	*	1.36815
chr5	138394129	138399128	5000	*	1.0967
chr5	138879129	138914128	35000	*	1.82726
chr5	141429127	141439126	10000	*	1.00115
chr5	142534126	142544125	10000	*	1.32534
chr5	142779125	142794124	15000	*	1.0234
chr5	144519124	144539123	20000	*	1.023
chr5	145664123	145684122	20000	*	1.02559
chr5	146259123	146279122	20000	*	1.1943
chr5	146789122	146794121	5000	*	1.45237
chr5	147514122	147524121	10000	*	1.07839
chr5	147709122	147719121	10000	*	1.46354
chr5	147969121	147974120	5000	*	1.04336
chr5	148589121	148594120	5000	*	1.0255
chr5	149234120	149239119	5000	*	1.797
chr5	149329120	149334119	5000	*	1.17473
chr5	149334120	149339119	5000	*	1.60485
chr5	149824120	149839119	15000	*	1.30445
chr5	150774119	150789118	15000	*	1.01446
chr5	151449119	151459118	10000	*	1.2282
chr5	152024118	152029117	5000	*	1.13147
chr5	153954117	153959116	5000	*	1.0052
chr5	154114116	154119115	5000	*	1.25926
chr5	154524116	154529115	5000	*	1.01066
chr5	156589114	156594113	5000	*	1.24969
chr5	157449114	157454113	5000	*	1.11325
chr5	157454114	157459113	5000	*	1.09329
chr5	157859113	157874112	15000	*	1.00438
chr5	157989113	157999112	10000	*	1.00611
chr5	158099113	158104112	5000	*	2.42772
chr5	159184112	159189111	5000	*	1.00047
chr5	160069112	160074111	5000	*	1.12881
chr5	162664110	162669109	5000	*	1.0741
chr5	162894109	162899108	5000	*	1.03675
chr5	163969109	163984108	15000	*	1.04097
chr5	164389108	164414107	25000	*	1.54618
chr5	164929108	164939107	10000	*	1.04619
chr5	166189107	166199106	10000	*	1.1483
chr5	166279107	166284106	5000	*	1.23934
chr5	166549107	166554106	5000	*	1.1145
chr5	166699106	166704105	5000	*	1.08807
chr5	166769106	166774105	5000	*	1.09042
chr5	170054104	170059103	5000	*	1.44753
chr5	170094104	170104103	10000	*	1.11215
chr5	170454104	170464102	9999	*	1.00726
chr5	170584103	170589102	5000	*	1.05936
chr5	171214103	171224102	10000	*	1.14773
chr5	171469103	171474102	5000	*	1.09146
chr5	171934102	171939101	5000	*	1.23026
chr5	172249102	172254101	5000	*	1.03214
chr5	172449102	172454101	5000	*	1.3995
chr5	173269101	173279100	10000	*	1.09474
chr5	173924101	173929100	5000	*	1.01449
chr5	173934101	173949100	15000	*	1.40898
chr5	174084101	174089100	5000	*	1.24706
chr5	174544100	174549099	5000	*	1.29599
chr5	175559099	175574098	15000	*	1.00046
chr5	177044098	177049097	5000	*	1.09404
chr5	177359098	177369097	10000	*	1.08645
chr5	180589095	180594094	5000	*	1.18268
chr5	181014095	181019094	5000	*	1.00145
chr6	870835	880834	10000	*	1.09298
chr6	960835	990834	30000	*	1.05571
chr6	1200835	1205834	5000	*	1.08637
chr6	1975834	2000833	25000	*	1.0297
chr6	2060834	2065833	5000	*	1.50909
chr6	2490834	2500833	10000	*	1.06516
chr6	3435833	3450832	15000	*	1.23959
chr6	4720832	4725831	5000	*	1.65327
chr6	5775831	5785830	10000	*	1.33096
chr6	8415829	8425828	10000	*	1.01037
chr6	9230828	9235827	5000	*	1.1561
chr6	9440828	9445827	5000	*	1.22285
chr6	10235828	10245827	10000	*	1.03339
chr6	10385827	10395826	10000	*	1.00124
chr6	11125827	11155826	30000	*	1.05237
chr6	11670826	11675825	5000	*	1.21079
chr6	11950826	11965825	15000	*	1.00514
chr6	12490826	12510825	20000	*	1.05883
chr6	12670826	12675825	5000	*	1.17161
chr6	13755825	13780824	25000	*	1.21775
chr6	15040824	15045823	5000	*	1.23183
chr6	16100823	16110822	10000	*	1.23935
chr6	16260823	16270822	10000	*	1.16061
chr6	16995822	17005821	10000	*	1.13917
chr6	17905822	17910821	5000	*	1.01588
chr6	18545821	18550820	5000	*	1.03096
chr6	19155821	19175819	19999	*	1.07332
chr6	19230820	19250819	20000	*	1.08801
chr6	19690820	19695819	5000	*	1.25959
chr6	19770820	19780819	10000	*	1.01287
chr6	20705819	20710818	5000	*	1.03283
chr6	21080819	21100818	20000	*	1.09347
chr6	21150819	21165818	15000	*	1.03111
chr6	21260819	21265818	5000	*	1.04444
chr6	24135817	24140816	5000	*	1.23013
chr6	24185817	24195816	10000	*	1.16342
chr6	24350816	24360815	10000	*	1.18341
chr6	24385816	24390815	5000	*	1.06536
chr6	24600816	24610815	10000	*	1.28374
chr6	24625816	24630815	5000	*	1.06248
chr6	24855816	24860815	5000	*	1.00247
chr6	25380816	25385815	5000	*	1.0526
chr6	25740815	25745814	5000	*	1.33061
chr6	26290815	26300814	10000	*	1.10786
chr6	26395815	26405814	10000	*	1.1177
chr6	27050814	27055813	5000	*	1.00577
chr6	27460814	27475813	15000	*	1.0454
chr6	28890813	28895812	5000	*	1.06281
chr6	29215813	29220812	5000	*	1.09896
chr6	29990812	30000811	10000	*	1.09792
chr6	30170812	30175811	5000	*	1.07158
chr6	30195812	30205811	10000	*	1.14686
chr6	30290812	30305811	15000	*	1.04343
chr6	30590811	30595810	5000	*	1.04469
chr6	33215809	33225808	10000	*	1.00466
chr6	34215809	34220808	5000	*	1.02162
chr6	34380808	34385807	5000	*	1.00154
chr6	36435807	36440806	5000	*	1.30155
chr6	37265806	37270805	5000	*	1.09463
chr6	37435806	37455805	20000	*	1.24978
chr6	39230805	39235804	5000	*	1.04336
chr6	40190804	40195803	5000	*	1.33797
chr6	41575803	41600802	25000	*	1.00963
chr6	43050802	43055801	5000	*	1.28285
chr6	43640801	43645800	5000	*	1.67891
chr6	45150800	45165799	15000	*	1.19221
chr6	45475800	45490799	15000	*	1.59707
chr6	46100799	46105798	5000	*	1.0587
chr6	47310798	47320797	10000	*	1.00838
chr6	47565798	47570797	5000	*	1.05631
chr6	47965798	47980797	15000	*	1.04618
chr6	48195797	48205796	10000	*	1.23724
chr6	48405797	48420796	15000	*	1.91786
chr6	49365797	49375796	10000	*	1.0798
chr6	52430794	52435793	5000	*	1.09482
chr6	54025793	54030792	5000	*	1.05088
chr6	55180792	55185791	5000	*	1.02982
chr6	55445792	55450791	5000	*	1.47847
chr6	56030791	56035790	5000	*	1.16414
chr6	56125791	56135790	10000	*	1.57689
chr6	56140791	56145790	5000	*	1.0633
chr6	60345788	60350787	5000	*	1.18458
chr6	60750788	60755787	5000	*	1.23085
chr6	60910787	60915786	5000	*	1.14094
chr6	61420787	61425786	5000	*	1.02452
chr6	63220786	63225785	5000	*	1.05257
chr6	64195785	64200784	5000	*	1.23063
chr6	64200785	64210784	10000	*	1.15568
chr6	64470785	64475784	5000	*	1.0388
chr6	64585784	64595783	10000	*	1.47531
chr6	65180784	65185783	5000	*	1.07047
chr6	65345784	65355783	10000	*	1.14115
chr6	65550784	65560783	10000	*	1.00338
chr6	66080783	66085782	5000	*	1.18698
chr6	66865783	66885782	20000	*	1.06516
chr6	67040783	67045782	5000	*	1.08339
chr6	67200782	67210781	10000	*	1.18351
chr6	67630782	67655781	25000	*	1.18543
chr6	67985782	67995781	10000	*	1.18241
chr6	68305782	68310781	5000	*	1.06726
chr6	68865781	68870780	5000	*	1.04736
chr6	69455781	69460780	5000	*	1.19328
chr6	69950780	69955779	5000	*	1.06537
chr6	70060780	70065779	5000	*	1.03846
chr6	71540779	71550778	10000	*	1.0393
chr6	71945779	71975778	30000	*	1.21093
chr6	72140778	72150777	10000	*	1.00711
chr6	72235778	72240777	5000	*	1.28998
chr6	72640778	72645777	5000	*	1.12217
chr6	73780777	73785776	5000	*	1.23259
chr6	75365776	75420775	55000	*	1.13593
chr6	75480776	75495775	15000	*	1.00992
chr6	75850776	75860775	10000	*	1.05735
chr6	76495775	76500774	5000	*	1.31465
chr6	77100775	77105774	5000	*	1.05137
chr6	77360774	77375773	15000	*	1.43799
chr6	77605774	77610773	5000	*	1.1726
chr6	78895773	78900772	5000	*	1.0982
chr6	82555770	82560769	5000	*	1.15483
chr6	83785769	83795768	10000	*	1.01609
chr6	84885768	84905767	20000	*	1.28973
chr6	85690768	85700767	10000	*	1.05797
chr6	87045767	87050766	5000	*	1.01739
chr6	87365766	87375765	10000	*	1.22613
chr6	87795766	87800765	5000	*	1.02452
chr6	88125766	88130765	5000	*	1.14278
chr6	88710765	88715764	5000	*	1.05363
chr6	88765765	88770764	5000	*	1.00213
chr6	89080765	89100764	20000	*	1.63909
chr6	89560765	89570764	10000	*	1.06427
chr6	90775764	90785763	10000	*	2.14543
chr6	90895764	90900763	5000	*	1.00396
chr6	90930764	90935763	5000	*	1.20575
chr6	91090763	91110762	20000	*	1.18573
chr6	93005762	93020761	15000	*	1.32653
chr6	95115760	95140759	25000	*	1.24111
chr6	95255760	95260759	5000	*	1.08024
chr6	95720760	95755759	35000	*	1.25277
chr6	95825760	95845759	20000	*	1.33959
chr6	96800759	96805758	5000	*	1.11202
chr6	97010759	97040758	30000	*	1.32987
chr6	97495758	97520757	25000	*	1.02031
chr6	99055757	99065756	10000	*	1.20025
chr6	99790757	99800756	10000	*	1.05849
chr6	100435756	100440755	5000	*	1.34855
chr6	102370755	102375753	4999	*	1.05995
chr6	102675754	102690753	15000	*	1.08651
chr6	103385754	103405753	20000	*	1.00821
chr6	105260752	105265751	5000	*	1.20111
chr6	105345752	105350751	5000	*	1.05941
chr6	106115752	106120751	5000	*	1.3122
chr6	106665751	106675750	10000	*	1.08538
chr6	106795751	106805750	10000	*	1.42655
chr6	106905751	106915750	10000	*	1.80774
chr6	107800750	107810749	10000	*	1.41385
chr6	108195750	108200749	5000	*	1.39212
chr6	112120747	112125746	5000	*	1.00577
chr6	112935746	112940745	5000	*	1.00978
chr6	113260746	113265745	5000	*	1.11528
chr6	113280746	113285745	5000	*	1.35678
chr6	113315746	113320745	5000	*	2.29673
chr6	113465746	113470745	5000	*	1.19117
chr6	114240745	114245744	5000	*	1.28515
chr6	116710743	116720742	10000	*	1.08003
chr6	117290743	117300742	10000	*	1.05667
chr6	117670742	117675741	5000	*	1.09992
chr6	122085739	122090738	5000	*	1.46071
chr6	123690738	123695737	5000	*	1.05316
chr6	126085736	126090735	5000	*	1.19205
chr6	128735734	128740733	5000	*	1.20482
chr6	129515733	129530732	15000	*	1.05485
chr6	129625733	129640732	15000	*	1.36285
chr6	130340732	130345731	5000	*	1.1156
chr6	135250728	135260727	10000	*	1.04309
chr6	135690728	135695727	5000	*	1.32123
chr6	135930728	135940727	10000	*	1.18127
chr6	136365728	136380727	15000	*	1.04614
chr6	136495727	136510726	15000	*	1.00342
chr6	139825725	139830724	5000	*	1.14966
chr6	141190724	141195723	5000	*	1.12637
chr6	141645723	141650722	5000	*	1.15818
chr6	142680723	142700722	20000	*	1.06735
chr6	142815722	142820721	5000	*	1.37596
chr6	142900722	142905721	5000	*	1.28705
chr6	144095721	144100720	5000	*	1.02429
chr6	144720721	144725720	5000	*	1.12809
chr6	144935721	144940720	5000	*	1.00046
chr6	145300720	145310719	10000	*	1.01846
chr6	146260720	146265719	5000	*	1.36984
chr6	147675719	147685718	10000	*	1.00044
chr6	148200718	148205717	5000	*	1.3434
chr6	148455718	148460717	5000	*	1.14986
chr6	149045717	149050716	5000	*	1.18945
chr6	149575717	149580716	5000	*	1.24541
chr6	149630717	149635716	5000	*	1.58581
chr6	150245717	150250716	5000	*	1.01531
chr6	150515716	150525715	10000	*	1.2909
chr6	151495716	151500715	5000	*	1.27286
chr6	152015715	152020714	5000	*	1.04847
chr6	152580715	152585714	5000	*	1.31792
chr6	152685715	152700714	15000	*	1.42845
chr6	153585714	153595713	10000	*	1.17017
chr6	154585713	154590712	5000	*	1.31263
chr6	155115713	155120712	5000	*	1.35915
chr6	155160713	155165712	5000	*	1.0499
chr6	155280713	155285712	5000	*	1.4948
chr6	155515712	155520711	5000	*	1.2747
chr6	155675712	155680711	5000	*	1.15888
chr6	156160712	156165711	5000	*	1.06551
chr6	156765711	156780710	15000	*	1.05521
chr6	157925710	157935709	10000	*	1.3369
chr6	158050710	158055709	5000	*	1.03602
chr6	159045710	159050709	5000	*	1.13582
chr6	160215709	160220708	5000	*	1.201
chr6	161065708	161075707	10000	*	1.01467
chr6	161590708	161600707	10000	*	1.06928
chr6	161975707	161995706	20000	*	1.09533
chr6	162405707	162410706	5000	*	1.00286
chr6	165745704	165750703	5000	*	1.19676
chr6	166180704	166195703	15000	*	1.44342
chr6	166600704	166605703	5000	*	1.26681
chr6	167345703	167355702	10000	*	1.48498
chr6	167400703	167405702	5000	*	1.13444
chr6	168300702	168305701	5000	*	1.07578
chr6	168975702	168980701	5000	*	1.05436
chr6	170590700	170600699	10000	*	1.05246
chr7	79721	104720	25000	*	1.11326
chr7	1369720	1389719	20000	*	1.06478
chr7	2069720	2099719	30000	*	1.41706
chr7	2099720	2104719	5000	*	1.41962
chr7	2559719	2584718	25000	*	1.03134
chr7	3874718	3884717	10000	*	1.04751
chr7	4139718	4144717	5000	*	1.05788
chr7	4534718	4549717	15000	*	1.0454
chr7	4694717	4699716	5000	*	1.12978
chr7	5329717	5334716	5000	*	1.06091
chr7	5399717	5404716	5000	*	1.30825
chr7	6629716	6634715	5000	*	1.10129
chr7	7644715	7649714	5000	*	1.15961
chr7	9789713	9804712	15000	*	1.07896
chr7	10164713	10179712	15000	*	1.00295
chr7	10639713	10649712	10000	*	1.13295
chr7	12309711	12329710	20000	*	1.3156
chr7	12509711	12514710	5000	*	1.11804
chr7	13304711	13309710	5000	*	1.10381
chr7	13449711	13459710	10000	*	1.0777
chr7	13759710	13784709	25000	*	1.0602
chr7	13789710	13809709	20000	*	1.05957
chr7	14054710	14059709	5000	*	1.04859
chr7	15094709	15139708	45000	*	1.10326
chr7	15504709	15509708	5000	*	1.03442
chr7	16904708	16909707	5000	*	1.14027
chr7	17099708	17109707	10000	*	1.33659
chr7	17909707	17914706	5000	*	1.36724
chr7	19594706	19599705	5000	*	1.22624
chr7	19614706	19619705	5000	*	1.10194
chr7	19974705	19989704	15000	*	1.07806
chr7	20554705	20559704	5000	*	1.27188
chr7	21034705	21049704	15000	*	1.6695
chr7	21229704	21239703	10000	*	1.00724
chr7	21289704	21294703	5000	*	1.16223
chr7	21329704	21344703	15000	*	1.19221
chr7	22949703	22954702	5000	*	1.27629
chr7	23659702	23664701	5000	*	1.07761
chr7	23779702	23789701	10000	*	1.44554
chr7	25369701	25379700	10000	*	1.18213
chr7	25584701	25604700	20000	*	1.17502
chr7	25849701	25854700	5000	*	1.15727
chr7	26099701	26139699	39999	*	1.35332
chr7	26669700	26674699	5000	*	1.00704
chr7	27029700	27034699	5000	*	1.54389
chr7	27179700	27184699	5000	*	1.02734
chr7	27824699	27829698	5000	*	1.33366
chr7	27844699	27849698	5000	*	1.01466
chr7	28474699	28489698	15000	*	1.31969
chr7	29074698	29084697	10000	*	1.05567
chr7	31624696	31634695	10000	*	1.23692
chr7	31734696	31739695	5000	*	1.09061
chr7	31819696	31824695	5000	*	1.09338
chr7	32844695	32849694	5000	*	1.07468
chr7	33439695	33444694	5000	*	1.03505
chr7	34059694	34064693	5000	*	1.06973
chr7	34189694	34194693	5000	*	1.08876
chr7	34539694	34544693	5000	*	1.40637
chr7	34554694	34559693	5000	*	1.03498
chr7	35289693	35294692	5000	*	1.00284
chr7	36054693	36069692	15000	*	1.02877
chr7	36414692	36419691	5000	*	1.07162
chr7	37379692	37394691	15000	*	1.09606
chr7	41169689	41194688	25000	*	1.28581
chr7	42979687	42984686	5000	*	1.07854
chr7	43064687	43079686	15000	*	1.03662
chr7	43279687	43289686	10000	*	1.10337
chr7	43389687	43394686	5000	*	1.28208
chr7	45374685	45379684	5000	*	1.28828
chr7	47219684	47224683	5000	*	1.04807
chr7	47479684	47504683	25000	*	1.036
chr7	48019683	48024682	5000	*	1.0816
chr7	49374682	49379681	5000	*	1.00212
chr7	49504682	49514681	10000	*	1.15335
chr7	50184681	50189680	5000	*	1.23425
chr7	50799681	50809680	10000	*	1.93605
chr7	51494680	51499679	5000	*	1.1905
chr7	51694680	51699679	5000	*	1.12045
chr7	51814680	51819679	5000	*	1.14989
chr7	51864680	51869679	5000	*	1.07216
chr7	51969680	51979679	10000	*	1.21047
chr7	52174680	52179679	5000	*	1.02612
chr7	53264679	53269678	5000	*	1.16906
chr7	53559679	53569678	10000	*	1.04191
chr7	53589679	53599678	10000	*	1.12735
chr7	54119678	54124677	5000	*	1.00474
chr7	56684676	56689675	5000	*	1.02892
chr7	57094676	57099675	5000	*	1.33597
chr7	57774675	57779674	5000	*	1.28226
chr7	61784672	61789671	5000	*	1.04743
chr7	62869671	62879670	10000	*	1.34777
chr7	63049671	63059670	10000	*	1.05717
chr7	63199671	63204670	5000	*	1.08967
chr7	64064670	64069669	5000	*	1.04552
chr7	65919669	65929668	10000	*	1.07107
chr7	66879668	66884667	5000	*	1.16678
chr7	66909668	66919667	10000	*	1.2095
chr7	67479668	67489667	10000	*	1.51913
chr7	69889666	69894665	5000	*	1.02363
chr7	70099666	70104665	5000	*	1.0234
chr7	70589665	70594664	5000	*	1.09834
chr7	71079665	71084664	5000	*	1.00269
chr7	71139665	71179664	40000	*	1.06304
chr7	71824664	71829663	5000	*	1.033
chr7	73519663	73524662	5000	*	1.16474
chr7	73749663	73754662	5000	*	1.01123
chr7	76314661	76324660	10000	*	1.12183
chr7	76349661	76364660	15000	*	1.06248
chr7	77999659	78004658	5000	*	1.00946
chr7	78389659	78399658	10000	*	1.20893
chr7	81019657	81024656	5000	*	1.00538
chr7	81269657	81274656	5000	*	1.10013
chr7	85054654	85064653	10000	*	1.01038
chr7	85234654	85239653	5000	*	1.12786
chr7	85459653	85464652	5000	*	1.00148
chr7	85744653	85749652	5000	*	1.23244
chr7	85959653	85964652	5000	*	1.08024
chr7	88529651	88534650	5000	*	1.32644
chr7	89534650	89539649	5000	*	1.03128
chr7	90134650	90154649	20000	*	1.01656
chr7	90264650	90269649	5000	*	1.14833
chr7	94484646	94494645	10000	*	1.17568
chr7	96659645	96679644	20000	*	1.25563
chr7	99234643	99249641	14999	*	1.04609
chr7	99969642	99979641	10000	*	1.01095
chr7	101204641	101209640	5000	*	1.03763
chr7	101914640	101919639	5000	*	1.07521
chr7	102129640	102139639	10000	*	1.01072
chr7	103464639	103469638	5000	*	1.07146
chr7	103919639	103924638	5000	*	1.17127
chr7	104204639	104209638	5000	*	1.08687
chr7	104634638	104644637	10000	*	1.27237
chr7	104744638	104754637	10000	*	1.4674
chr7	105114638	105124637	10000	*	1.00711
chr7	105579637	105584636	5000	*	1.00466
chr7	106539637	106549636	10000	*	1.05145
chr7	106694637	106704636	10000	*	1.23981
chr7	106939636	106964635	25000	*	1.38837
chr7	107614636	107619635	5000	*	1.03636
chr7	108459635	108469634	10000	*	1.37361
chr7	108474635	108489634	15000	*	1.12647
chr7	109694634	109709633	15000	*	1.13075
chr7	110294634	110299633	5000	*	1.19332
chr7	110499634	110524633	25000	*	1.07091
chr7	111159633	111164632	5000	*	1.15439
chr7	118504627	118519626	15000	*	1.02559
chr7	118609627	118614626	5000	*	1.32771
chr7	118614627	118624626	10000	*	1.08727
chr7	120374626	120379625	5000	*	1.19987
chr7	121454625	121459624	5000	*	1.21736
chr7	121674625	121684624	10000	*	1.02251
chr7	121914625	121919624	5000	*	1.98842
chr7	122824624	122834623	10000	*	1.0216
chr7	123039624	123044623	5000	*	1.18252
chr7	123584623	123589622	5000	*	1.14657
chr7	126104621	126109620	5000	*	1.60964
chr7	126279621	126284620	5000	*	1.02485
chr7	126904621	126909620	5000	*	1.10353
chr7	127379620	127394619	15000	*	1.04165
chr7	129094619	129099618	5000	*	1.00716
chr7	129944618	129949617	5000	*	1.00924
chr7	132574616	132579615	5000	*	1.08388
chr7	133234616	133239615	5000	*	1.46688
chr7	133624615	133629614	5000	*	1.02492
chr7	133999615	134004614	5000	*	1.11738
chr7	134709614	134719613	10000	*	1.17397
chr7	135779614	135804612	24999	*	1.55682
chr7	135959613	135964612	5000	*	1.05956
chr7	137549612	137564611	15000	*	1.05997
chr7	137704612	137719611	15000	*	1.04603
chr7	138344611	138349610	5000	*	1.29403
chr7	138499611	138504610	5000	*	1.12147
chr7	139189611	139204610	15000	*	1.10958
chr7	139354611	139359610	5000	*	1.04057
chr7	141174609	141179608	5000	*	1.01589
chr7	141284609	141289608	5000	*	1.08652
chr7	141344609	141354608	10000	*	1.35264
chr7	141389609	141409608	20000	*	1.61542
chr7	141444609	141454608	10000	*	1.56118
chr7	141909609	141914608	5000	*	1.04508
chr7	142719608	142729607	10000	*	1.09878
chr7	142854608	142859607	5000	*	1.36245
chr7	143319608	143324607	5000	*	1.01869
chr7	144084607	144104606	20000	*	1.04032
chr7	144599607	144609606	10000	*	1.15491
chr7	145069606	145079605	10000	*	1.63823
chr7	145204606	145209605	5000	*	1.04119
chr7	145729606	145739605	10000	*	1.10046
chr7	146089605	146094604	5000	*	1.15685
chr7	150499602	150504601	5000	*	1.24597
chr7	150819602	150824601	5000	*	1.07279
chr7	150939601	150954600	15000	*	1.31617
chr7	150974601	150984600	10000	*	1.36864
chr7	151304601	151314600	10000	*	1.13025
chr7	151369601	151384600	15000	*	1.06827
chr7	151534601	151539600	5000	*	1.01968
chr7	152194600	152204599	10000	*	1.1227
chr7	152999600	153014599	15000	*	1.20553
chr7	154044599	154049598	5000	*	1.10221
chr7	154739598	154749597	10000	*	1.08066
chr7	155179598	155209597	30000	*	1.21892
chr7	155519598	155529597	10000	*	1.2486
chr7	155794598	155799597	5000	*	1.04297
chr7	156044597	156049596	5000	*	1.2278
chr7	156119597	156124596	5000	*	1.00206
chr7	156644597	156674596	30000	*	1.02428
chr7	156789597	156794596	5000	*	1.11535
chr7	157734596	157774595	40000	*	1.07609
chr7	157959596	157969595	10000	*	1.55682
chr7	158389596	158394595	5000	*	1.05683
chr7	158644595	158649594	5000	*	1.31164
chr8	478621	483620	5000	*	1.14299
chr8	998621	1003620	5000	*	1.09184
chr8	3143619	3148618	5000	*	1.02986
chr8	3803619	3808618	5000	*	1.15092
chr8	4068619	4073618	5000	*	1.05886
chr8	4073619	4088618	15000	*	1.35012
chr8	4123619	4133618	10000	*	1.24639
chr8	4273618	4278617	5000	*	1.50559
chr8	4588618	4603617	15000	*	1.25251
chr8	4913618	4918617	5000	*	1.20437
chr8	4953618	4963617	10000	*	1.09144
chr8	4988618	4993617	5000	*	1.02208
chr8	5153618	5158617	5000	*	1.15439
chr8	5528617	5533616	5000	*	1.05308
chr8	5658617	5678616	20000	*	1.12558
chr8	6073617	6078616	5000	*	1.10489
chr8	6533617	6553616	20000	*	1.56238
chr8	8148615	8153614	5000	*	1.13165
chr8	8443615	8448614	5000	*	1.02605
chr8	11743613	11748611	4999	*	1.00426
chr8	13653611	13663610	10000	*	1.16285
chr8	14153611	14163610	10000	*	1.25012
chr8	15763609	15768608	5000	*	1.22474
chr8	16103609	16108608	5000	*	1.00047
chr8	16743609	16758608	15000	*	1.22947
chr8	18553607	18568606	15000	*	1.06514
chr8	18573607	18588606	15000	*	1.06436
chr8	19523606	19533605	10000	*	1.74896
chr8	19563606	19578605	15000	*	1.52033
chr8	19803606	19818605	15000	*	1.04843
chr8	19828606	19833605	5000	*	1.20925
chr8	19858606	19863605	5000	*	1.10621
chr8	19868606	19873605	5000	*	1.21817
chr8	19883606	19903605	20000	*	1.17471
chr8	19938606	19943605	5000	*	1.24594
chr8	20193606	20203605	10000	*	1.19834
chr8	20498606	20503605	5000	*	1.18367
chr8	20563606	20568605	5000	*	1.25579
chr8	20598605	20603604	5000	*	1.24593
chr8	21003605	21008604	5000	*	1.22039
chr8	21313605	21318604	5000	*	1.10211
chr8	21383605	21388604	5000	*	1.03639
chr8	22023604	22033603	10000	*	1.37209
chr8	22043604	22048603	5000	*	1.37584
chr8	22218604	22223603	5000	*	1.00673
chr8	22243604	22258603	15000	*	1.29858
chr8	22723604	22728603	5000	*	1.05826
chr8	23843603	23858602	15000	*	1.11847
chr8	23918603	23923602	5000	*	1.02406
chr8	24598602	24643601	45000	*	1.19875
chr8	25058602	25063601	5000	*	1.32202
chr8	25178602	25188601	10000	*	1.1704
chr8	26633601	26663600	30000	*	1.02165
chr8	26768601	26783600	15000	*	1.30881
chr8	26783601	26793600	10000	*	1.26632
chr8	27563600	27568599	5000	*	1.17697
chr8	28738599	28743598	5000	*	1.03399
chr8	29828598	29838597	10000	*	1.10158
chr8	30563598	30578597	15000	*	1.17774
chr8	30603598	30608597	5000	*	1.12686
chr8	30928597	30938596	10000	*	1.08892
chr8	30983597	30998596	15000	*	1.12304
chr8	31708597	31713596	5000	*	1.02924
chr8	33153596	33163595	10000	*	1.17188
chr8	33193595	33198594	5000	*	1.17188
chr8	34528594	34533593	5000	*	1.17143
chr8	35048594	35053593	5000	*	1.51646
chr8	35778593	35783592	5000	*	1.00919
chr8	36123593	36128592	5000	*	1.11862
chr8	36163593	36178592	15000	*	1.69341
chr8	36348593	36358592	10000	*	1.0454
chr8	37838592	37853591	15000	*	1.07525
chr8	38248591	38253590	5000	*	1.59881
chr8	38463591	38468590	5000	*	1.07564
chr8	38893591	38903590	10000	*	1.1054
chr8	39208591	39213590	5000	*	1.23303
chr8	39623590	39628589	5000	*	1.12318
chr8	39858590	39868589	10000	*	1.01573
chr8	40183590	40208589	25000	*	1.02107
chr8	40533590	40543589	10000	*	1.10425
chr8	40553590	40558589	5000	*	1.09537
chr8	40868589	40873588	5000	*	1.22215
chr8	41708589	41713588	5000	*	1.14989
chr8	42688588	42703587	15000	*	1.24317
chr8	43813587	43828586	15000	*	1.37584
chr8	46398585	46403584	5000	*	1.05922
chr8	46538585	46543584	5000	*	1.07235
chr8	47513584	47518583	5000	*	1.16835
chr8	47888584	47893583	5000	*	1.03163
chr8	48648583	48678582	30000	*	1.18085
chr8	49038583	49043582	5000	*	1.08359
chr8	49488583	49493582	5000	*	1.2773
chr8	49703582	49708581	5000	*	1.02869
chr8	50163582	50183581	20000	*	1.25419
chr8	50608582	50623581	15000	*	1.21115
chr8	51443581	51448580	5000	*	1.21832
chr8	51993581	51998580	5000	*	1.43199
chr8	52163580	52173579	10000	*	1.29425
chr8	53003580	53013579	10000	*	1.10621
chr8	53393579	53398578	5000	*	1.13275
chr8	53743579	53768578	25000	*	1.09124
chr8	53793579	53808578	15000	*	1.1602
chr8	53943579	53948578	5000	*	1.30017
chr8	53963579	53968578	5000	*	1.10621
chr8	53988579	53998578	10000	*	1.08524
chr8	53998579	54008578	10000	*	1.75595
chr8	54183579	54188578	5000	*	1.35634
chr8	54358579	54368578	10000	*	1.58168
chr8	54528579	54533578	5000	*	1.72369
chr8	54548579	54553578	5000	*	1.11151
chr8	54613578	54628577	15000	*	1.64571
chr8	54643578	54648577	5000	*	1.68853
chr8	54668578	54688577	20000	*	1.06427
chr8	54843578	54863577	20000	*	1.315
chr8	54918578	54923577	5000	*	1.07896
chr8	55008578	55028577	20000	*	1.35499
chr8	59423575	59428574	5000	*	1.05998
chr8	79418559	79423558	5000	*	1.009
chr8	81593557	81598556	5000	*	1.14136
chr8	85203554	85208553	5000	*	1.20276
chr8	98438544	98443543	5000	*	1.05419
chr8	98903543	98908542	5000	*	1.02849
chr8	111118534	111123533	5000	*	1.09611
chr8	112678532	112683531	5000	*	1.14254
chr8	119303527	119318526	15000	*	1.16517
chr8	120993526	120998525	5000	*	1.12036
chr8	132008517	132018516	10000	*	1.1129
chr8	137848512	137853511	5000	*	1.13759
chr8	142083509	142088508	5000	*	1.0316
chr9	1164870	1174869	10000	*	1.02052
chr9	5109867	5114866	5000	*	1.09485
chr9	10959862	10964861	5000	*	1.20366
chr9	26319850	26324849	5000	*	1.05167
chr9	30919846	30924845	5000	*	1.26617
chr9	32304845	32314844	10000	*	1.13124
chr9	38424840	38439839	15000	*	1.01013
chr9	64104820	64114819	10000	*	1.06079
chr9	76344810	76349809	5000	*	1.0255
chr9	77809809	77814808	5000	*	1.24879
chr9	87054802	87059801	5000	*	1.44736
chr9	90394799	90399798	5000	*	1.0741
chr9	90884799	90889798	5000	*	1.08705
chr9	100454791	100479790	25000	*	1.40593
chr9	102679789	102684788	5000	*	1.02491
chr9	114799780	114804779	5000	*	1.2749
chr9	115694779	115704778	10000	*	1.39597
chr9	122784773	122789772	5000	*	1.02826
chr9	128909768	128914767	5000	*	1.06166
chr11	5562511	5567510	5000	*	1.09826
chr11	9542508	9547507	5000	*	1.15491
chr11	9672508	9692507	20000	*	1.19103
chr11	11062507	11072506	10000	*	1.11625
chr11	12927506	12937505	10000	*	1.09871
chr11	14772504	14782503	10000	*	1.29848
chr11	29937492	29947491	10000	*	1.06984
chr11	31037491	31042490	5000	*	1.49955
chr11	32002490	32007489	5000	*	1.1604
chr11	34332489	34337488	5000	*	1.12375
chr11	36122487	36127486	5000	*	1.14417
chr11	45182480	45187479	5000	*	1.23994
chr11	45187480	45192479	5000	*	1.04138
chr11	66367463	66377462	10000	*	1.00722
chr11	74882456	74887455	5000	*	1.07214
chr11	75977456	75982454	4999	*	1.44179
chr11	77577454	77582453	5000	*	1.1109
chr11	81062451	81067450	5000	*	1.09386
chr11	85487448	85492447	5000	*	1.04325
chr11	85677448	85682447	5000	*	1.19555
chr11	86977447	86992446	15000	*	1.03147
chr11	87707446	87712445	5000	*	1.12436
chr11	96362439	96367438	5000	*	1.52802
chr11	99537437	99542436	5000	*	1.14791
chr11	100727436	100742435	15000	*	1.16999
chr11	101842435	101847434	5000	*	1.2086
chr11	107927430	107932429	5000	*	1.01093
chr11	110572428	110582427	10000	*	1.00384
chr11	116212424	116217423	5000	*	1.39866
chr11	116322423	116327422	5000	*	1.19049
chr11	118157422	118167421	10000	*	1.01164
chr11	120322420	120342419	20000	*	1.05551
chr11	129687413	129692412	5000	*	1.03659
chr12	9270779	9285778	15000	*	1.17877
chr12	10970778	10980777	10000	*	1.12131
chr12	12650777	12665776	15000	*	1.16206
chr12	14815775	14825774	10000	*	1.00545
chr12	24700767	24705766	5000	*	1.28841
chr12	26240766	26255765	15000	*	1.04297
chr12	47835749	47845748	10000	*	1.00306
chr12	49025748	49030747	5000	*	1.37662
chr12	51655746	51665745	10000	*	1.04545
chr12	68955732	68960731	5000	*	1.17666
chr12	77660725	77665724	5000	*	1.1367
chr12	79180724	79185723	5000	*	1.10142
chr12	82015722	82020721	5000	*	1.30957
chr12	83780720	83800719	20000	*	1.01352
chr12	88335717	88345716	10000	*	1.11445
chr12	94665712	94690711	25000	*	1.16314
chr12	94755711	94775710	20000	*	1.37752
chr12	102220706	102235705	15000	*	1.16731
chr12	111535698	111540697	5000	*	1.00901
chr12	118430693	118440692	10000	*	1.02144
chr12	118925692	118930691	5000	*	1.19756
chr12	119150692	119155691	5000	*	1.27334
chr12	132370682	132375681	5000	*	1.32205
chr13	19910356	19915355	5000	*	1.08479
chr13	19925356	19930355	5000	*	1.06464
chr13	22000354	22005353	5000	*	1.05061
chr13	23770353	23775352	5000	*	1.05794
chr13	24935352	24955351	20000	*	1.28261
chr13	28370349	28375348	5000	*	1.06229
chr13	35455344	35460343	5000	*	1.10085
chr13	36945343	36950342	5000	*	1.07159
chr13	41940339	41950338	10000	*	1.42744
chr13	53025330	53030329	5000	*	1.13901
chr13	62005323	62010322	5000	*	1.10737
chr13	86305303	86320302	15000	*	1.24058
chr13	98660294	98665293	5000	*	1.1472
chr13	99190293	99195292	5000	*	1.09072
chr13	102340291	102350290	10000	*	1.09519
chr13	104650289	104670288	20000	*	1.21199
chr13	105050289	105065288	15000	*	1.03846
chr13	110850284	110860283	10000	*	1.07961
chr13	112315283	112320282	5000	*	1.33624
chr13	112895282	112915281	20000	*	1.21005
chr14	32190928	32195927	5000	*	1.00965
[truncated: 3,732 more rows]

## Sheet: H3K14ac_SW1116
chr1	995001	1000000	5000	*	1.11535
chr1	1135001	1160000	25000	*	1.27997
chr1	1260001	1269999	9999	*	1.2581
chr1	1330000	1354999	25000	*	1.12998
chr1	1475000	1479999	5000	*	1.10955
chr1	1780000	1784999	5000	*	1.12936
chr1	2080000	2089999	10000	*	1.253
chr1	2170000	2179999	10000	*	1.2626
chr1	3419999	3424998	5000	*	1.21319
chr1	4039998	4044997	5000	*	1.04656
chr1	4164998	4169997	5000	*	1.02268
chr1	5124997	5144996	20000	*	1.25932
chr1	5909997	5914996	5000	*	1.34602
chr1	6514996	6519995	5000	*	1.20082
chr1	6724996	6729995	5000	*	1.11713
chr1	6744996	6754995	10000	*	1.43313
chr1	6944996	6949995	5000	*	1.54343
chr1	7019996	7034995	15000	*	1.03058
chr1	7064996	7074995	10000	*	1.4457
chr1	7779995	7784994	5000	*	1.92283
chr1	7924995	7929994	5000	*	1.29106
chr1	8624995	8629994	5000	*	1.11273
chr1	8644995	8649994	5000	*	1.28505
chr1	8694995	8704994	10000	*	1.09491
chr1	9009994	9019993	10000	*	1.08219
chr1	9049994	9059993	10000	*	1.10625
chr1	9064994	9084993	20000	*	1.15645
chr1	9109994	9124993	15000	*	1.04529
chr1	9109994	9119993	10000	*	1.03763
chr1	9354994	9359993	5000	*	1.00884
chr1	9574994	9579993	5000	*	1.39178
chr1	10039994	10059993	20000	*	1.10084
chr1	10854993	10859992	5000	*	1.30699
chr1	11004993	11029992	25000	*	1.36878
chr1	11139993	11149992	10000	*	1.1198
chr1	11659992	11664991	5000	*	1.16977
chr1	12309992	12314991	5000	*	1.2882
chr1	12634991	12639990	5000	*	1.29488
chr1	12679991	12689990	10000	*	1.08322
chr1	12724991	12729990	5000	*	1.02969
chr1	13329991	13344990	15000	*	1.08928
chr1	13619991	13624990	5000	*	1.03897
chr1	13744991	13749990	5000	*	1.11768
chr1	13959990	13964989	5000	*	1.34276
chr1	14054990	14059989	5000	*	1.04529
chr1	14109990	14124989	15000	*	1.10923
chr1	14294990	14314989	20000	*	1.17759
chr1	14394990	14399989	5000	*	1.05983
chr1	14444990	14449989	5000	*	1.12568
chr1	14709990	14719989	10000	*	1.04234
chr1	15399989	15409988	10000	*	1.04231
chr1	15839989	15849988	10000	*	1.34991
chr1	15864989	15869988	5000	*	1.12826
chr1	16349989	16374988	25000	*	1.2569
chr1	17114988	17124987	10000	*	1.30256
chr1	17294988	17304987	10000	*	1.15687
chr1	17419988	17424987	5000	*	1.02868
chr1	17634988	17639987	5000	*	1.16018
chr1	17754987	17759986	5000	*	1.27961
chr1	18124987	18129986	5000	*	1.20593
chr1	18254987	18259986	5000	*	1.24991
chr1	18429987	18434986	5000	*	1.21269
chr1	18714987	18724986	10000	*	1.06603
chr1	18884987	18894986	10000	*	1.09561
chr1	19309986	19324985	15000	*	1.03011
chr1	20019986	20024985	5000	*	1.10911
chr1	20134986	20144985	10000	*	1.28219
chr1	20189985	20194984	5000	*	1.27537
chr1	20284985	20289984	5000	*	1.00138
chr1	20644985	20659984	15000	*	1.57798
chr1	20794985	20799984	5000	*	1.08765
chr1	20874985	20879984	5000	*	1.01295
chr1	21449984	21459983	10000	*	1.1367
chr1	22279984	22284983	5000	*	1.07201
chr1	22744983	22754982	10000	*	1.11298
chr1	22764983	22794982	30000	*	1.12343
chr1	22834983	22849982	15000	*	1.0128
chr1	23529983	23534982	5000	*	1.14501
chr1	24179982	24184981	5000	*	1.12119
chr1	24254982	24264981	10000	*	1.00342
chr1	24404982	24419981	15000	*	1.04995
chr1	24504982	24509981	5000	*	1.04794
chr1	24534982	24544981	10000	*	1.18246
chr1	24759982	24764981	5000	*	1.23874
chr1	25164982	25174981	10000	*	1.023
chr1	25604981	25614980	10000	*	1.30699
chr1	26124981	26129980	5000	*	1.10284
chr1	26499980	26504979	5000	*	1.25302
chr1	26834980	26859979	25000	*	1.12382
chr1	27099980	27104979	5000	*	1.01872
chr1	28349979	28354978	5000	*	1.05082
chr1	28544979	28559978	15000	*	1.34198
chr1	28749979	28754978	5000	*	1.19478
chr1	28859979	28864978	5000	*	1.02946
chr1	29089978	29094977	5000	*	1.12166
chr1	29429978	29439977	10000	*	1.11597
chr1	30009978	30034977	25000	*	1.2575
chr1	30139978	30144977	5000	*	1.15436
chr1	30749977	30754976	5000	*	1.14817
chr1	31234977	31249976	15000	*	1.00737
chr1	31569976	31574975	5000	*	1.109
chr1	31909976	31914975	5000	*	1.05273
chr1	31959976	31969975	10000	*	1.16603
chr1	32114976	32119975	5000	*	1.11476
chr1	32419976	32424975	5000	*	1.10427
chr1	33109975	33114974	5000	*	1.31729
chr1	33154975	33164974	10000	*	1.09184
chr1	34824974	34839973	15000	*	1.10166
chr1	35224974	35229973	5000	*	1.20308
chr1	35419973	35424972	5000	*	1.09215
chr1	36349973	36354972	5000	*	1.26543
chr1	36654972	36674971	20000	*	1.52802
chr1	36934972	36954971	20000	*	1.60982
chr1	37254972	37259971	5000	*	1.02623
chr1	37514972	37524971	10000	*	1.11037
chr1	37854971	37859970	5000	*	1.19244
chr1	38094971	38099970	5000	*	1.15155
chr1	38179971	38184970	5000	*	1.05666
chr1	38384971	38394970	10000	*	1.00597
chr1	38569971	38579970	10000	*	1.30663
chr1	38694971	38704970	10000	*	1.64906
chr1	38744971	38749970	5000	*	1.05819
chr1	39504970	39509969	5000	*	1.00764
chr1	39839970	39844969	5000	*	1.00412
chr1	39879970	39889969	10000	*	1.16542
chr1	40484969	40494968	10000	*	1.07172
chr1	40529969	40534968	5000	*	1.2092
chr1	40619969	40624968	5000	*	1.25988
chr1	40684969	40689968	5000	*	1.08153
chr1	41329969	41339968	10000	*	1.00194
chr1	41404969	41409968	5000	*	1.01462
chr1	41594969	41604967	9999	*	1.112
chr1	41844968	41849967	5000	*	1.08301
chr1	42939967	42944966	5000	*	1.26162
chr1	43374967	43389966	15000	*	1.03888
chr1	44199966	44204965	5000	*	1.30983
chr1	44374966	44379965	5000	*	1.19713
chr1	44754966	44764965	10000	*	1.11213
chr1	44879966	44884965	5000	*	1.08958
chr1	44954966	44959965	5000	*	1.36412
chr1	45579965	45584964	5000	*	1.05126
chr1	45734965	45744964	10000	*	1.39939
chr1	45824965	45834964	10000	*	1.17257
chr1	46219965	46224964	5000	*	1.26488
chr1	46249965	46264964	15000	*	1.02433
chr1	46439965	46449964	10000	*	1.15381
chr1	46439965	46444964	5000	*	1.04583
chr1	46539965	46544964	5000	*	1.26234
chr1	48139963	48149962	10000	*	1.08748
chr1	48254963	48274962	20000	*	1.07199
chr1	48534963	48539962	5000	*	1.11377
chr1	49064963	49074962	10000	*	1.05948
chr1	51119961	51124960	5000	*	1.37132
chr1	51939960	51944959	5000	*	1.05606
chr1	52079960	52084959	5000	*	1.22729
chr1	52419960	52434959	15000	*	1.14487
chr1	53104959	53119958	15000	*	1.35707
chr1	53444959	53449958	5000	*	1.03564
chr1	53994959	54004958	10000	*	1.3353
chr1	54349958	54364957	15000	*	1.333
chr1	55134958	55139957	5000	*	1.22718
chr1	55454958	55474956	19999	*	1.09398
chr1	55479957	55494956	15000	*	1.2795
chr1	55619957	55629956	10000	*	1.24807
chr1	56709957	56714956	5000	*	1.04383
chr1	56949956	56959955	10000	*	1.75422
chr1	57219956	57234955	15000	*	1.38063
chr1	57309956	57319955	10000	*	1.66194
chr1	57424956	57449955	25000	*	1.00446
chr1	58034955	58044954	10000	*	1.01016
chr1	58194955	58209954	15000	*	1.0151
chr1	58519955	58529954	10000	*	1.16389
chr1	58599955	58614954	15000	*	1.02927
chr1	59029955	59044954	15000	*	1.03492
chr1	59279954	59289953	10000	*	1.04037
chr1	59409954	59414953	5000	*	1.20796
chr1	59689954	59694953	5000	*	1.0644
chr1	59724954	59739953	15000	*	1.69874
chr1	59744954	59749953	5000	*	1.12783
chr1	59789954	59814953	25000	*	1.959
chr1	59819954	59834953	15000	*	1.20699
chr1	59899954	59914953	15000	*	1.09001
chr1	59949954	59959953	10000	*	1.22268
chr1	60169954	60174953	5000	*	1.38095
chr1	60179954	60184953	5000	*	1.69874
chr1	60224954	60229953	5000	*	1.0644
chr1	60299954	60304953	5000	*	1.23426
chr1	60394954	60404953	10000	*	1.04395
chr1	60504954	60519952	14999	*	1.54858
chr1	60524953	60534952	10000	*	1.02266
chr1	60524953	60529952	5000	*	1.64382
chr1	60759953	60764952	5000	*	1.44013
chr1	61089953	61094952	5000	*	1.13016
chr1	61119953	61129952	10000	*	1.22574
chr1	61194953	61219952	25000	*	1.02493
chr1	61299953	61304952	5000	*	1.14873
chr1	61329953	61334952	5000	*	1.20039
chr1	62469952	62474951	5000	*	1.00101
chr1	62494952	62499951	5000	*	2.13369
chr1	62509952	62519951	10000	*	1.40376
chr1	62529952	62534951	5000	*	1.13804
chr1	62539952	62544951	5000	*	1.00433
chr1	62679952	62684951	5000	*	1.05297
chr1	63244951	63249950	5000	*	1.28922
chr1	63274951	63279950	5000	*	1.24935
chr1	63319951	63324950	5000	*	1.3139
chr1	63804951	63809950	5000	*	1.46638
chr1	63874951	63889950	15000	*	1.03912
chr1	64729950	64749949	20000	*	1.1146
chr1	64914950	64919949	5000	*	1.09706
chr1	64924950	64929949	5000	*	1.27634
chr1	65034950	65049949	15000	*	1.16556
chr1	65319950	65344949	25000	*	1.01171
chr1	65444950	65454949	10000	*	1.03601
chr1	66094949	66099948	5000	*	1.17475
chr1	66454949	66464948	10000	*	1.1149
chr1	66484949	66489948	5000	*	1.10642
chr1	66969948	66979947	10000	*	1.08321
chr1	66974948	66979947	5000	*	1.40384
chr1	67209948	67214947	5000	*	1.01176
chr1	67384948	67394947	10000	*	1.20527
chr1	67784948	67799947	15000	*	1.69285
chr1	68044948	68059947	15000	*	1.02703
chr1	68249947	68254946	5000	*	1.46628
chr1	68634947	68644946	10000	*	1.51965
chr1	68684947	68689946	5000	*	1.05003
chr1	68759947	68764946	5000	*	1.21251
chr1	68829947	68834946	5000	*	1.00359
chr1	69099947	69104946	5000	*	1.47189
chr1	69714946	69739945	25000	*	1.00323
chr1	69739946	69749945	10000	*	1.06709
chr1	69869946	69879945	10000	*	1.00489
chr1	70004946	70014945	10000	*	1.04383
chr1	70789945	70804944	15000	*	1.10851
chr1	70924945	70929944	5000	*	1.02204
chr1	71089945	71099944	10000	*	1.05604
chr1	71539945	71549944	10000	*	1.12138
chr1	72164944	72169943	5000	*	1.0457
chr1	72219944	72229943	10000	*	1.02753
chr1	72969944	72974943	5000	*	1.22619
chr1	73614943	73619942	5000	*	1.04615
chr1	73684943	73689942	5000	*	1.24521
chr1	74304943	74309942	5000	*	1.01333
chr1	75274942	75294941	20000	*	1.13369
chr1	76109941	76124940	15000	*	1.6083
chr1	76494941	76499940	5000	*	1.01107
chr1	77414940	77419939	5000	*	1.0822
chr1	77469940	77474939	5000	*	1.05806
chr1	78364939	78369938	5000	*	1.03094
chr1	78599939	78604938	5000	*	1.00801
chr1	78614939	78619938	5000	*	1.04271
chr1	79729938	79734937	5000	*	1.05951
chr1	81034937	81039936	5000	*	1.14601
chr1	81079937	81084936	5000	*	1.16346
chr1	81369937	81374936	5000	*	1.26593
chr1	81654937	81664936	10000	*	1.12411
chr1	82969936	82974935	5000	*	1.08321
chr1	83104936	83109935	5000	*	1.16383
chr1	83259935	83264934	5000	*	1.14257
chr1	83864935	83869934	5000	*	1.0523
chr1	84134935	84139934	5000	*	1.36992
chr1	84354935	84359934	5000	*	1.07824
chr1	84479934	84494933	15000	*	1.0608
chr1	84614934	84619933	5000	*	1.06298
chr1	84764934	84774933	10000	*	1.0478
chr1	84924934	84939933	15000	*	1.12534
chr1	85094934	85099933	5000	*	1.22849
chr1	85564934	85569933	5000	*	1.03809
chr1	85604934	85609933	5000	*	1.04566
chr1	85644934	85659933	15000	*	1.02909
chr1	85814933	85819932	5000	*	1.1972
chr1	85839933	85844932	5000	*	1.0344
chr1	85864933	85869932	5000	*	1.13391
chr1	86179933	86184932	5000	*	1.10839
chr1	86189933	86199932	10000	*	1.23426
chr1	86359933	86364932	5000	*	1.10421
chr1	86404933	86409932	5000	*	1.15857
chr1	86639933	86649932	10000	*	1.05422
chr1	87079932	87089931	10000	*	1.12514
chr1	87434932	87439931	5000	*	1.18415
chr1	87564932	87569931	5000	*	1.02995
chr1	87704932	87729931	25000	*	1.11007
chr1	88304931	88324930	20000	*	1.00702
chr1	88634931	88639930	5000	*	1.00442
chr1	88759931	88769930	10000	*	1.04652
chr1	89849930	89854929	5000	*	1.39047
chr1	90124930	90129929	5000	*	1.32055
chr1	90134930	90154929	20000	*	1.20699
chr1	90159930	90179929	20000	*	1.02345
chr1	90384930	90399929	15000	*	1.23589
chr1	90594930	90604929	10000	*	1.03724
chr1	90874929	90879928	5000	*	1.022
chr1	90934929	90939928	5000	*	1.28329
chr1	91069929	91079928	10000	*	1.0482
chr1	91214929	91224928	10000	*	1.06085
chr1	92139928	92144927	5000	*	1.11988
chr1	92159928	92164927	5000	*	1.37432
chr1	92379928	92389927	10000	*	1.00297
chr1	92864928	92874927	10000	*	1.21306
chr1	93249928	93254927	5000	*	1.10141
chr1	94424927	94429926	5000	*	1.03523
chr1	95714926	95724925	10000	*	1.15767
chr1	95979925	95984924	5000	*	1.0148
chr1	96214925	96219924	5000	*	1.04914
chr1	96239925	96254924	15000	*	1.71731
chr1	96594925	96604924	10000	*	1.02125
chr1	96749925	96759924	10000	*	1.55235
chr1	96844925	96849924	5000	*	1.34088
chr1	97129924	97134923	5000	*	1.11271
chr1	98049924	98054923	5000	*	1.15662
chr1	98324924	98339922	14999	*	1.10785
chr1	98524923	98529922	5000	*	1.0238
chr1	98544923	98549922	5000	*	1.186
chr1	98734923	98744922	10000	*	1.15172
chr1	98799923	98804922	5000	*	1.30564
chr1	99904922	99919921	15000	*	1.13386
chr1	100014922	100029921	15000	*	1.07018
chr1	100074922	100079921	5000	*	1.0931
chr1	100229922	100239921	10000	*	1.01404
chr1	100374922	100384921	10000	*	1.17194
chr1	100884921	100889920	5000	*	1.02767
chr1	101379921	101389920	10000	*	1.02283
chr1	101654921	101659920	5000	*	1.33904
chr1	103324920	103329919	5000	*	1.25552
chr1	104174919	104179918	5000	*	1.1682
chr1	104184919	104194918	10000	*	1.35281
chr1	104794918	104799917	5000	*	1.20661
chr1	104974918	104979917	5000	*	1.59707
chr1	105024918	105034917	10000	*	1.00758
chr1	105234918	105254917	20000	*	1.11164
chr1	105579918	105584917	5000	*	1.43313
chr1	106114917	106124916	10000	*	1.02907
chr1	106849917	106854916	5000	*	1.35434
chr1	107319916	107329915	10000	*	1.5034
chr1	107854916	107864915	10000	*	1.1191
chr1	107929916	107934915	5000	*	1.45274
chr1	108159916	108164915	5000	*	1.43662
chr1	108179916	108189915	10000	*	1.12783
chr1	108474915	108479914	5000	*	1.02426
chr1	108499915	108504914	5000	*	1.1443
chr1	108529915	108539914	10000	*	1.50723
chr1	108629915	108634914	5000	*	1.03211
chr1	109309915	109314914	5000	*	1.56134
chr1	109539915	109559914	20000	*	1.07584
chr1	109619915	109634914	15000	*	1.08893
chr1	110299914	110304913	5000	*	1.20612
chr1	110674914	110679913	5000	*	1.02811
chr1	110774914	110784913	10000	*	1.24061
chr1	110969913	110974912	5000	*	1.40962
chr1	111004913	111024912	20000	*	1.38095
chr1	111249913	111259912	10000	*	1.11461
chr1	111394913	111404912	10000	*	1.13683
chr1	111444913	111454912	10000	*	1.24097
chr1	111479913	111484912	5000	*	1.91823
chr1	111919913	111929912	10000	*	1.02077
chr1	111934913	111944912	10000	*	1.03503
chr1	112069913	112094912	25000	*	1.08259
chr1	112224912	112229911	5000	*	1.19568
chr1	112454912	112459911	5000	*	1.06386
chr1	112729912	112749911	20000	*	1.24869
chr1	113054912	113064911	10000	*	1.23053
chr1	113104912	113109911	5000	*	1.11776
chr1	113139912	113144911	5000	*	1.08382
chr1	113149912	113159911	10000	*	1.11589
chr1	113459911	113469910	10000	*	1.01267
chr1	113629911	113634910	5000	*	1.10443
chr1	113734911	113754910	20000	*	1.01244
chr1	113964911	113969910	5000	*	1.1386
chr1	114099911	114119910	20000	*	1.20379
chr1	114444911	114454910	10000	*	1.13433
chr1	114499911	114504910	5000	*	1.12896
chr1	115159910	115179909	20000	*	1.47609
chr1	115289910	115294909	5000	*	1.04842
chr1	115804910	115829909	25000	*	1.07299
chr1	116034909	116044908	10000	*	1.98464
chr1	116104909	116109908	5000	*	1.00844
chr1	116164909	116169908	5000	*	1.29701
chr1	116624909	116629908	5000	*	1.04796
chr1	116834909	116839908	5000	*	1.26645
chr1	116924909	116949908	25000	*	1.14855
chr1	117224909	117229908	5000	*	1.10237
chr1	117234909	117249907	14999	*	1.25774
chr1	117604908	117614907	10000	*	1.92117
chr1	117944908	117949907	5000	*	1.12213
chr1	118179908	118184907	5000	*	1.09088
chr1	118724907	118729906	5000	*	1.13524
chr1	118839907	118854906	15000	*	1.00063
chr1	118889907	118899906	10000	*	1.19414
chr1	119144907	119159906	15000	*	1.17059
chr1	119399907	119404906	5000	*	1.05077
chr1	119774906	119779905	5000	*	1.0852
chr1	119949906	119969905	20000	*	1.04946
chr1	145514886	145519885	5000	*	1.03147
chr1	145569886	145574885	5000	*	1.16384
chr1	145819886	145824885	5000	*	1.14303
chr1	145959886	145969885	10000	*	1.02756
chr1	145984886	145989885	5000	*	1.38264
chr1	146044886	146049885	5000	*	1.24001
chr1	146964885	146969884	5000	*	1.03662
chr1	147639884	147644883	5000	*	1.398
chr1	147799884	147804883	5000	*	1.0325
chr1	147899884	147909883	10000	*	1.32798
chr1	147954884	147959883	5000	*	1.3346
chr1	148189884	148194883	5000	*	1.03286
chr1	148434884	148439883	5000	*	1.18025
chr1	148624884	148629883	5000	*	1.87094
chr1	149979883	149984882	5000	*	1.03719
chr1	150509882	150519881	10000	*	1.0164
chr1	150624882	150629881	5000	*	1.14321
chr1	151144882	151159881	15000	*	1.33867
chr1	151169882	151184881	15000	*	1.07473
chr1	151579881	151599880	20000	*	1.56457
chr1	151874881	151884880	10000	*	1.07374
chr1	152529881	152544879	14999	*	1.09479
chr1	152564880	152569879	5000	*	1.02431
chr1	152709880	152719879	10000	*	1.05161
chr1	153339880	153354879	15000	*	1.47921
chr1	153369880	153379879	10000	*	1.42514
chr1	153854879	153884878	30000	*	1.52562
chr1	153999879	154009878	10000	*	1.08051
chr1	154114879	154134878	20000	*	1.07873
chr1	154629879	154634878	5000	*	1.5117
chr1	154689879	154694878	5000	*	1.2956
chr1	154844879	154859878	15000	*	1.06603
chr1	155539878	155559877	20000	*	1.14143
chr1	155709878	155719877	10000	*	1.08015
chr1	155939878	155944877	5000	*	1.27698
chr1	156049878	156054877	5000	*	1.02282
chr1	156999877	157004876	5000	*	1.24793
chr1	157509877	157524876	15000	*	1.13516
chr1	157834876	157839875	5000	*	1.31713
chr1	158239876	158244875	5000	*	1.03287
chr1	158504876	158509875	5000	*	1.07966
chr1	158549876	158554875	5000	*	1.4947
chr1	158599876	158604875	5000	*	1.20327
chr1	158674876	158679875	5000	*	1.14569
chr1	159189875	159199874	10000	*	1.29549
chr1	159209875	159214874	5000	*	1.11389
chr1	159244875	159254874	10000	*	1.04747
chr1	160019875	160024874	5000	*	1.1065
chr1	160259874	160264873	5000	*	1.06206
chr1	160619874	160629873	10000	*	1.1368
chr1	161039874	161044873	5000	*	1.66997
chr1	161264874	161274873	10000	*	1.09663
chr1	161499873	161524872	25000	*	1.39368
chr1	161564873	161569872	5000	*	1.44163
chr1	161814873	161819872	5000	*	1.18265
chr1	162439873	162449872	10000	*	1.04919
chr1	162574873	162579872	5000	*	1.06625
chr1	162879872	162889871	10000	*	1.07584
chr1	162939872	162949871	10000	*	1.2237
chr1	163029872	163034871	5000	*	1.18616
chr1	163179872	163184871	5000	*	1.25764
chr1	163669872	163679871	10000	*	1.09482
chr1	164229871	164239870	10000	*	1.13016
chr1	164354871	164364870	10000	*	1.13863
chr1	164399871	164409870	10000	*	1.01963
chr1	164529871	164534870	5000	*	1.0323
chr1	164559871	164564870	5000	*	1.03717
chr1	164939871	164954870	15000	*	1.04952
chr1	165079871	165084870	5000	*	1.1196
chr1	165124871	165129870	5000	*	1.05229
chr1	165794870	165804869	10000	*	1.05579
chr1	166134870	166149869	15000	*	1.40307
chr1	166159870	166164869	5000	*	1.29935
chr1	166419869	166424868	5000	*	1.29518
chr1	166459869	166464868	5000	*	1.05583
chr1	166829869	166834868	5000	*	1.00813
chr1	167024869	167029868	5000	*	1.07369
chr1	167584869	167594868	10000	*	1.20634
chr1	167874868	167879867	5000	*	1.47173
chr1	167889868	167894867	5000	*	1.18381
chr1	168824868	168829867	5000	*	1.01524
chr1	168984867	168994866	10000	*	1.16341
chr1	169369867	169374866	5000	*	1.24316
chr1	169949867	169954866	5000	*	1.26634
chr1	170404866	170409865	5000	*	1.06536
chr1	171189866	171194865	5000	*	1.56191
chr1	171379866	171394865	15000	*	1.29691
chr1	171484865	171514864	30000	*	1.21474
chr1	171649865	171654864	5000	*	1.00516
chr1	171869865	171874864	5000	*	1.21253
chr1	171894865	171899864	5000	*	1.08775
chr1	172874864	172879863	5000	*	1.02581
chr1	172929864	172934863	5000	*	1.16764
chr1	173199864	173204863	5000	*	1.04344
chr1	173514864	173519863	5000	*	1.1243
chr1	173709864	173724863	15000	*	1.05447
chr1	174024863	174049862	25000	*	1.14124
chr1	174154863	174159862	5000	*	1.19007
chr1	174564863	174569862	5000	*	1.08863
chr1	174889863	174904862	15000	*	1.01671
chr1	175334862	175339861	5000	*	1.02272
chr1	175364862	175369861	5000	*	1.24185
chr1	175484862	175494861	10000	*	1.02535
chr1	175494862	175524861	30000	*	1.1649
chr1	175919862	175924861	5000	*	1.24737
chr1	176144862	176159861	15000	*	1.20117
chr1	176604861	176614860	10000	*	1.20338
chr1	176799861	176804860	5000	*	1.08926
chr1	177014861	177019860	5000	*	1.12839
chr1	177279861	177294860	15000	*	1.03022
chr1	177969860	177974859	5000	*	1.06727
chr1	178249860	178254859	5000	*	1.26378
chr1	178594860	178609859	15000	*	2.08271
chr1	178834860	178859859	25000	*	1.37684
chr1	178894860	178899859	5000	*	1.08409
chr1	179154859	179184858	30000	*	1.03472
chr1	179174859	179184858	10000	*	1.16231
chr1	179214859	179219858	5000	*	1.33914
chr1	179379859	179399858	20000	*	1.05042
chr1	179414859	179419858	5000	*	1.11362
chr1	179679859	179684858	5000	*	1.08348
chr1	179814859	179819858	5000	*	1.14536
chr1	180184859	180194858	10000	*	1.36159
chr1	180254859	180264858	10000	*	1.10001
chr1	180309858	180314857	5000	*	1.14007
chr1	180604858	180609857	5000	*	1.44171
chr1	180704858	180709857	5000	*	1.02508
chr1	181159858	181164857	5000	*	1.16212
chr1	181179858	181184857	5000	*	1.05275
chr1	181209858	181219857	10000	*	1.75624
chr1	181524858	181544856	19999	*	1.59851
chr1	181764857	181774856	10000	*	1.00456
chr1	181854857	181874856	20000	*	1.32466
chr1	181919857	181929856	10000	*	1.41806
chr1	182009857	182024856	15000	*	1.03626
chr1	182134857	182144856	10000	*	1.04405
chr1	182159857	182164856	5000	*	1.83473
chr1	182184857	182189856	5000	*	1.513
chr1	182229857	182244856	15000	*	1.42438
chr1	182419857	182434856	15000	*	1.50232
chr1	182504857	182514856	10000	*	1.17632
chr1	182859856	182879855	20000	*	1.79422
chr1	182899856	182909855	10000	*	1.0644
chr1	182929856	182944855	15000	*	1.08519
chr1	183279856	183289855	10000	*	1.19624
chr1	183344856	183349855	5000	*	1.05788
chr1	183529856	183534855	5000	*	1.05821
chr1	183604856	183614855	10000	*	1.04012
chr1	183674856	183689855	15000	*	1.55569
chr1	184309855	184314854	5000	*	1.23129
chr1	184419855	184424854	5000	*	1.06541
chr1	184549855	184574854	25000	*	1.4857
chr1	185459854	185464853	5000	*	1.3062
chr1	185564854	185569853	5000	*	1.07319
chr1	185649854	185654853	5000	*	1.1427
chr1	185899854	185904853	5000	*	1.0621
chr1	185989854	185994853	5000	*	1.11489
chr1	186254854	186259853	5000	*	1.21531
chr1	186599853	186604852	5000	*	1.04268
chr1	186624853	186629852	5000	*	1.08656
chr1	187179853	187194852	15000	*	1.14238
chr1	187484853	187489852	5000	*	1.65444
chr1	187504853	187509852	5000	*	1.04066
chr1	188249852	188259851	10000	*	1.24346
chr1	188384852	188389851	5000	*	1.00182
chr1	188444852	188449851	5000	*	1.25731
chr1	188644852	188649851	5000	*	1.01327
chr1	189264851	189269850	5000	*	1.07666
chr1	189704851	189709850	5000	*	1.03409
chr1	189739851	189749850	10000	*	1.0627
chr1	189769851	189774850	5000	*	1.48603
chr1	190054851	190069850	15000	*	1.0152
chr1	190154851	190174850	20000	*	1.40376
chr1	190619850	190624849	5000	*	1.35281
chr1	190684850	190689849	5000	*	1.36609
chr1	191139850	191144849	5000	*	1.30649
chr1	191154850	191169849	15000	*	1.08819
chr1	191164850	191184849	20000	*	1.35281
chr1	192029849	192039848	10000	*	1.14416
chr1	192319849	192324848	5000	*	1.08882
chr1	192569849	192579848	10000	*	1.04059
chr1	192679849	192689848	10000	*	1.34132
chr1	193044848	193074847	30000	*	1.12466
chr1	193729848	193734847	5000	*	1.01423
chr1	194184847	194194846	10000	*	1.02573
chr1	194209847	194214846	5000	*	1.28794
chr1	194539847	194549846	10000	*	1.19394
chr1	194679847	194684846	5000	*	1.3062
chr1	195479846	195484845	5000	*	1.01901
chr1	195559846	195564845	5000	*	1.17477
chr1	195749846	195754845	5000	*	1.10442
chr1	195784846	195789845	5000	*	1.25683
chr1	195914846	195919845	5000	*	1.54993
chr1	195979846	195989845	10000	*	1.11362
chr1	196044846	196049845	5000	*	1.36095
chr1	196439846	196454845	15000	*	1.02923
chr1	196669845	196674844	5000	*	1.02587
chr1	196719845	196729844	10000	*	1.12474
chr1	196784845	196789844	5000	*	1.20538
chr1	197389845	197404844	15000	*	1.07138
chr1	197604845	197609844	5000	*	1.02714
chr1	197799845	197804844	5000	*	1.13345
chr1	197814845	197819844	5000	*	1.27686
chr1	197824845	197834844	10000	*	1.04639
chr1	198229844	198234843	5000	*	1.40813
chr1	198684844	198689843	5000	*	1.0478
chr1	199104844	199119843	15000	*	1.01456
chr1	199239843	199244842	5000	*	1.13191
chr1	199259843	199269842	10000	*	1.38255
chr1	199309843	199314842	5000	*	1.54682
chr1	199434843	199439842	5000	*	1.06378
chr1	199519843	199524842	5000	*	1.26469
chr1	199664843	199669842	5000	*	1.12925
chr1	199724843	199729842	5000	*	1.10076
chr1	199909843	199919842	10000	*	1.1665
chr1	201004842	201009841	5000	*	1.31338
chr1	201189842	201194841	5000	*	1.06428
chr1	201229842	201234841	5000	*	1.12771
chr1	201334842	201344841	10000	*	1.09611
chr1	201399842	201414841	15000	*	1.09658
chr1	201874841	201879840	5000	*	1.1273
chr1	201899841	201909840	10000	*	1.00627
chr1	202524841	202529840	5000	*	1.10018
chr1	202724841	202729840	5000	*	1.35801
chr1	202859841	202869840	10000	*	1.04825
chr1	203304840	203319839	15000	*	1.05392
chr1	203319840	203324839	5000	*	1.1417
chr1	203409840	203429839	20000	*	1.22793
chr1	204029840	204034839	5000	*	1.29273
chr1	204079840	204089839	10000	*	1.34508
chr1	204284839	204289838	5000	*	1.133
chr1	204644839	204649838	5000	*	1.00685
chr1	204814839	204829838	15000	*	1.10861
chr1	206159838	206164837	5000	*	1.545
chr1	206609838	206614837	5000	*	1.16951
chr1	206919837	206954836	35000	*	1.22553
chr1	207084837	207094836	10000	*	1.175
chr1	207819837	207829836	10000	*	1.0106
chr1	208414836	208419835	5000	*	1.1283
chr1	208539836	208544835	5000	*	1.02882
chr1	208809836	208814835	5000	*	1.02656
chr1	208854836	208859835	5000	*	1.097
chr1	209694835	209699834	5000	*	1.30371
chr1	210229835	210234834	5000	*	1.04638
chr1	210784834	210789833	5000	*	1.32542
chr1	211264834	211269833	5000	*	1.00541
chr1	211289834	211294833	5000	*	1.13325
chr1	211769834	211774833	5000	*	1.37239
chr1	211799833	211809832	10000	*	1.05091
chr1	211829833	211839832	10000	*	1.1957
chr1	211934833	211944832	10000	*	2.0405
chr1	212129833	212134832	5000	*	1.05795
chr1	212149833	212159832	10000	*	1.44956
chr1	212184833	212189832	5000	*	1.69165
chr1	212199833	212209832	10000	*	1.35411
chr1	212259833	212264832	5000	*	1.01034
chr1	212544833	212549832	5000	*	1.11396
chr1	212594833	212599832	5000	*	1.1186
chr1	212694833	212699832	5000	*	1.08518
chr1	213079832	213084831	5000	*	1.00581
chr1	213224832	213229831	5000	*	1.07664
chr1	213384832	213409831	25000	*	1.22423
chr1	213389832	213399831	10000	*	1.24466
chr1	213414832	213429831	15000	*	1.24929
chr1	213599832	213619831	20000	*	1.00878
chr1	213609832	213614831	5000	*	1.20538
chr1	213634832	213639831	5000	*	1.03712
chr1	213699832	213709831	10000	*	1.16199
chr1	213829832	213834831	5000	*	1.13497
chr1	214244832	214259831	15000	*	1.32867
chr1	214689831	214694830	5000	*	1.25177
chr1	214949831	214964830	15000	*	1.03224
chr1	215404831	215409830	5000	*	1.15275
chr1	215904830	215909829	5000	*	1.38475
chr1	216074830	216079829	5000	*	1.14801
chr1	216394830	216404829	10000	*	1.02806
chr1	216584830	216589829	5000	*	1.11796
chr1	216799830	216804829	5000	*	1.03739
chr1	217014829	217019828	5000	*	1.07762
chr1	218069829	218124827	54999	*	1.14477
chr1	218899828	218904827	5000	*	1.21158
chr1	219509827	219514826	5000	*	1.10369
chr1	219714827	219719826	5000	*	1.01325
chr1	219809827	219829826	20000	*	1.06374
chr1	220654826	220679825	25000	*	1.06548
chr1	220774826	220779825	5000	*	1.04908
chr1	220884826	220889825	5000	*	1.00437
chr1	220884826	220889825	5000	*	1.17488
chr1	220904826	220909825	5000	*	1.19338
chr1	221054826	221099825	45000	*	1.4424
chr1	221184826	221189825	5000	*	1.03346
chr1	221269826	221274825	5000	*	1.12257
chr1	221619826	221624825	5000	*	1.03548
chr1	221629826	221639825	10000	*	1.4543
chr1	222139825	222144824	5000	*	1.04233
chr1	222224825	222239824	15000	*	1.01577
chr1	222619825	222629824	10000	*	1.56245
chr1	222929825	222944824	15000	*	1.16866
chr1	223009825	223019824	10000	*	1.23612
chr1	223049825	223059824	10000	*	1.44888
chr1	223074825	223084824	10000	*	1.18116
chr1	223189824	223194823	5000	*	1.10445
chr1	223249824	223259823	10000	*	1.05116
chr1	223634824	223644823	10000	*	1.01143
chr1	224039824	224044823	5000	*	1.4211
chr1	224214824	224224823	10000	*	1.01515
chr1	224354824	224364823	10000	*	1.00865
chr1	224839823	224854822	15000	*	1.11546
chr1	225059823	225064822	5000	*	1.0212
chr1	225404823	225414822	10000	*	1.0367
chr1	225699822	225704821	5000	*	1.11898
chr1	226054822	226059821	5000	*	1.01787
chr1	226379822	226384821	5000	*	1.02141
chr1	226479822	226484821	5000	*	1.52289
chr1	226659822	226664821	5000	*	1.16361
chr1	226924821	226939820	15000	*	1.07514
chr1	227064821	227074820	10000	*	1.28026
chr1	227069821	227079820	10000	*	1.31604
chr1	227254821	227259820	5000	*	1.01752
chr1	227304821	227324820	20000	*	1.37135
chr1	227329821	227344820	15000	*	1.24843
chr1	227909821	227914820	5000	*	1.12837
chr1	228214820	228219819	5000	*	1.1519
chr1	228279820	228284819	5000	*	1.06307
chr1	228414820	228419819	5000	*	1.21859
chr1	228529820	228544819	15000	*	1.20344
chr1	229734819	229739818	5000	*	1.48603
chr1	229979819	229984818	5000	*	1.00655
chr1	230119819	230139818	20000	*	1.26929
chr1	230169819	230174818	5000	*	1.32581
chr1	230314819	230319818	5000	*	1.13915
chr1	230324819	230334818	10000	*	1.08245
chr1	230409819	230414818	5000	*	1.28896
chr1	230579819	230584818	5000	*	1.53594
chr1	230789818	230794817	5000	*	1.43663
chr1	230824818	230829817	5000	*	1.14039
chr1	230909818	230919817	10000	*	1.59639
chr1	231259818	231269817	10000	*	1.1371
chr1	231529818	231534817	5000	*	1.09015
chr1	231939818	231944817	5000	*	1.16231
chr1	232294817	232299816	5000	*	1.22667
chr1	232454817	232459816	5000	*	1.02375
chr1	232694817	232699816	5000	*	1.54093
chr1	232799817	232809816	10000	*	1.07799
chr1	232819817	232824816	5000	*	1.03647
chr1	232854817	232874816	20000	*	1.38365
chr1	233429816	233444815	15000	*	1.09839
chr1	233599816	233614815	15000	*	1.04831
chr1	233699816	233704815	5000	*	1.09508
chr1	233864816	233869815	5000	*	1.00466
chr1	234049816	234069815	20000	*	1.32523
chr1	234229816	234249815	20000	*	1.00748
chr1	234569815	234584814	15000	*	1.25301
chr1	234709815	234719814	10000	*	1.19648
chr1	234764815	234774814	10000	*	1.14084
chr1	234994815	234999814	5000	*	1.02823
chr1	235329815	235339814	10000	*	1.05215
chr1	235829814	235839813	10000	*	1.06721
chr1	235854814	235864813	10000	*	1.24995
chr1	236104814	236114813	10000	*	1.41454
chr1	236209814	236219813	10000	*	1.10442
chr1	236269814	236274813	5000	*	1.20723
chr1	236704814	236714813	10000	*	1.53837
chr1	236739814	236749813	10000	*	1.07372
chr1	236879814	236884813	5000	*	1.73843
chr1	237039813	237049812	10000	*	1.32918
chr1	237224813	237239812	15000	*	1.85461
chr1	237264813	237279812	15000	*	1.13844
chr1	237279813	237289812	10000	*	1.13088
chr1	237334813	237339812	5000	*	1.16229
chr1	237579813	237584812	5000	*	1.09833
chr1	237924813	237944812	20000	*	1.25054
chr1	239239812	239264811	25000	*	1.02829
chr1	239544811	239549810	5000	*	1.22433
chr1	239749811	239754810	5000	*	1.03929
chr1	239854811	239874810	20000	*	1.22505
chr1	240279811	240289810	10000	*	1.17463
chr1	240394811	240399810	5000	*	1.07136
chr1	240419811	240424810	5000	*	1.21572
chr1	240499811	240509810	10000	*	1.05026
chr1	240524811	240529810	5000	*	1.16552
chr1	240919810	240929809	10000	*	1.20382
chr1	241009810	241014809	5000	*	1.25301
chr1	241274810	241279809	5000	*	1.41587
chr1	241294810	241314809	20000	*	1.0912
chr1	241594810	241614809	20000	*	1.20558
chr1	241839810	241854809	15000	*	1.1644
chr1	242074809	242079808	5000	*	1.06251
chr1	242099809	242114808	15000	*	1.89588
chr1	242269809	242274808	5000	*	1.02497
chr1	242294809	242299808	5000	*	1.00648
chr1	242489809	242499808	10000	*	1.29121
chr1	243094809	243109808	15000	*	1.09695
chr1	243379808	243384807	5000	*	1.00664
chr1	243719808	243724807	5000	*	1.08386
chr1	243779808	243789807	10000	*	1.30381
chr1	243849808	243854807	5000	*	1.12374
chr1	244039808	244044807	5000	*	1.42833
chr1	244894807	244899806	5000	*	1.15817
chr1	245029807	245039806	10000	*	1.07112
chr1	245114807	245119806	5000	*	1.17083
chr1	245114807	245119806	5000	*	1.11386
chr1	245149807	245154806	5000	*	1.17541
chr1	245279807	245289806	10000	*	1.08306
chr1	245369807	245374806	5000	*	1.18105
chr1	245394807	245399806	5000	*	1.045
chr1	245799807	245804806	5000	*	1.19751
chr1	246439806	246444805	5000	*	1.18276
chr1	246754806	246769805	15000	*	1.12379
chr1	246874806	246884805	10000	*	1.23899
chr1	247279805	247284804	5000	*	1.08223
chr1	247419805	247424804	5000	*	1.1761
chr1	248079805	248089804	10000	*	1.29462
chr1	248124805	248134804	10000	*	1.35163
chr1	248224805	248234804	10000	*	1.15555
chr1	248479804	248484803	5000	*	1.00759
chr1	248719804	248724803	5000	*	1.04644
chr1	248799804	248824803	25000	*	1.08493
chr2	318382	323381	5000	*	1.08605
chr2	413382	418381	5000	*	1.0367
chr2	438382	443381	5000	*	1.49506
chr2	518382	523381	5000	*	1.12479
chr2	693381	703380	10000	*	1.73066
chr2	843381	848380	5000	*	1.05986
chr2	878381	883380	5000	*	1.17982
chr2	923381	928380	5000	*	1.08321
chr2	983381	993380	10000	*	1.12042
chr2	1043381	1048380	5000	*	1.1834
chr2	1083381	1093380	10000	*	1.06826
chr2	1138381	1148380	10000	*	1.15618
chr2	1213381	1218380	5000	*	1.08411
chr2	1238381	1243380	5000	*	1.32662
chr2	1288381	1293380	5000	*	1.03488
chr2	1678381	1688380	10000	*	1.27155
chr2	1853381	1858380	5000	*	1.21262
chr2	2208380	2213379	5000	*	1.37334
chr2	2468380	2473379	5000	*	1.24052
chr2	3588379	3593378	5000	*	1.15938
chr2	3658379	3663378	5000	*	1.00612
chr2	3808379	3813378	5000	*	1.01387
chr2	4053379	4058378	5000	*	1.34961
chr2	4213379	4223378	10000	*	1.45439
chr2	4368379	4373378	5000	*	1.12649
chr2	4373379	4378378	5000	*	1.01289
chr2	4418379	4433377	14999	*	1.38136
chr2	4518378	4523377	5000	*	1.21824
chr2	4703378	4713377	10000	*	1.21249
chr2	4938378	4943377	5000	*	1.07365
chr2	5138378	5153377	15000	*	1.03098
chr2	5208378	5213377	5000	*	1.30068
chr2	5478378	5483377	5000	*	1.0018
chr2	6063377	6093376	30000	*	1.37877
chr2	6138377	6158376	20000	*	1.39145
chr2	6308377	6323376	15000	*	1.17279
chr2	6308377	6318376	10000	*	1.18831
chr2	6418377	6433376	15000	*	1.2489
chr2	6638377	6658376	20000	*	1.41176
chr2	6748377	6753376	5000	*	1.12961
chr2	7108376	7113375	5000	*	1.03624
chr2	7633376	7638375	5000	*	1.1225
chr2	7788376	7798375	10000	*	1.10486
chr2	8313375	8323374	10000	*	1.12775
chr2	10393374	10413373	20000	*	1.00936
chr2	10438374	10443373	5000	*	1.04402
chr2	10483374	10488373	5000	*	1.32411
chr2	10698374	10713373	15000	*	1.03274
chr2	11268373	11273372	5000	*	1.09366
chr2	11278373	11283372	5000	*	1.14427
chr2	11453373	11458372	5000	*	1.44868
chr2	12763372	12773371	10000	*	1.32004
chr2	13463371	13468370	5000	*	1.11186
chr2	13558371	13563370	5000	*	1.19316
chr2	13843371	13858370	15000	*	1.03128
chr2	14223371	14228370	5000	*	1.07492
chr2	14983370	14988369	5000	*	1.08406
chr2	15268370	15273369	5000	*	1.08718
chr2	15688370	15693369	5000	*	1.06102
chr2	15758370	15763369	5000	*	1.14344
chr2	15793369	15798368	5000	*	1.10643
chr2	15953369	15958368	5000	*	1.39588
chr2	16008369	16013368	5000	*	1.28868
chr2	16553369	16558368	5000	*	1.06599
chr2	17398368	17418367	20000	*	1.4036
chr2	17788368	17793367	5000	*	1.09139
chr2	18343367	18348366	5000	*	1.11701
chr2	19473367	19488366	15000	*	1.02221
chr2	19888366	19893365	5000	*	1.11254
chr2	20018366	20038365	20000	*	1.43695
chr2	20453366	20458365	5000	*	1.22974
chr2	20468366	20473365	5000	*	1.35933
chr2	21313365	21318364	5000	*	1.40802
chr2	21423365	21428364	5000	*	1.08453
chr2	21548365	21553364	5000	*	1.09307
chr2	21628365	21638364	10000	*	1.05973
chr2	21653365	21658364	5000	*	1.51025
chr2	22203364	22208363	5000	*	1.39283
chr2	22623364	22633363	10000	*	1.18755
chr2	22788364	22793363	5000	*	1.00964
chr2	24638362	24648361	10000	*	1.03256
chr2	24838362	24863361	25000	*	1.17815
chr2	25033362	25038361	5000	*	1.23942
chr2	25148362	25153361	5000	*	1.26996
chr2	25383362	25393361	10000	*	1.09275
chr2	26318361	26323360	5000	*	1.22313
chr2	26728361	26743360	15000	*	1.01743
chr2	27233360	27243359	10000	*	1.2513
chr2	27383360	27388359	5000	*	1.04039
chr2	27418360	27428359	10000	*	1.04648
chr2	28008360	28013359	5000	*	1.03551
chr2	28498359	28503358	5000	*	1.14052
chr2	28578359	28583358	5000	*	1.30544
chr2	28978359	28983358	5000	*	1.38095
chr2	29053359	29058358	5000	*	1.02563
chr2	30028358	30038357	10000	*	1.09559
chr2	30358358	30363357	5000	*	1.11362
chr2	30778358	30783357	5000	*	1.22688
chr2	30838358	30848357	10000	*	1.46609
chr2	31038357	31043356	5000	*	1.17258
chr2	31178357	31183356	5000	*	1.15297
chr2	31353357	31378356	25000	*	1.20581
chr2	31743357	31748356	5000	*	1.18082
chr2	31793357	31798356	5000	*	1.40897
chr2	32063357	32078356	15000	*	1.01419
chr2	32098357	32113356	15000	*	1.07288
chr2	32118357	32123356	5000	*	1.00321
chr2	32173356	32208355	35000	*	1.20187
chr2	32263356	32278355	15000	*	1.09474
chr2	32333356	32338355	5000	*	1.33707
chr2	33218356	33223355	5000	*	1.02118
chr2	33298356	33303355	5000	*	1.0151
chr2	33448355	33453354	5000	*	1.00224
chr2	33688355	33703354	15000	*	1.11726
chr2	34118355	34123354	5000	*	1.13249
chr2	35743354	35748353	5000	*	1.20257
chr2	36073353	36093352	20000	*	1.01217
chr2	36383353	36398352	15000	*	1.02343
chr2	36408353	36413352	5000	*	1.0761
chr2	36428353	36433352	5000	*	1.00135
chr2	36438353	36443352	5000	*	1.959
chr2	36498353	36503352	5000	*	1.05416
chr2	36628353	36638352	10000	*	1.12168
chr2	37203353	37213351	9999	*	1.46533
chr2	37263352	37268351	5000	*	1.0946
chr2	37473352	37493351	20000	*	1.03347
chr2	37553352	37558351	5000	*	1.03347
chr2	37658352	37663351	5000	*	1.2361
chr2	37708352	37713351	5000	*	1.04742
chr2	37728352	37733351	5000	*	1.02866
chr2	37893352	37908351	15000	*	1.05466
chr2	37973352	37993351	20000	*	1.00077
chr2	38023352	38028351	5000	*	1.06898
chr2	38153352	38163351	10000	*	1.25835
chr2	38178352	38183351	5000	*	1.09571
chr2	38308352	38313351	5000	*	1.00826
chr2	38558351	38563350	5000	*	1.19799
chr2	38833351	38843350	10000	*	1.21431
chr2	39073351	39078350	5000	*	1.29675
chr2	39593351	39598350	5000	*	1.11641
chr2	39788350	39803349	15000	*	1.22171
chr2	40268350	40273349	5000	*	1.02482
chr2	40388350	40393349	5000	*	1.0223
chr2	40593350	40598349	5000	*	1.55243
chr2	40628350	40638349	10000	*	1.08995
chr2	40673350	40683349	10000	*	1.35554
chr2	41238349	41243348	5000	*	1.03923
chr2	41273349	41278348	5000	*	1.49937
chr2	41503349	41538348	35000	*	1.00441
chr2	41988349	41993348	5000	*	1.02963
chr2	42873348	42883347	10000	*	1.01943
chr2	43208348	43213347	5000	*	1.14017
chr2	43588347	43618346	30000	*	1.15236
chr2	44983346	44993345	10000	*	1.30844
chr2	45398346	45408345	10000	*	1.00772
chr2	45568346	45573345	5000	*	1.048
chr2	45968346	45973345	5000	*	1.14116
chr2	46143345	46148344	5000	*	1.08193
chr2	46703345	46708344	5000	*	1.19716
chr2	47883344	47893343	10000	*	1.25569
chr2	48123344	48128343	5000	*	1.01534
chr2	48488344	48493343	5000	*	1.10767
chr2	49173343	49198342	25000	*	1.17928
chr2	49648343	49668342	20000	*	1.18477
chr2	50048342	50053341	5000	*	1.03942
chr2	50863342	50873341	10000	*	1.23746
chr2	51093341	51098340	5000	*	1.23915
chr2	51523341	51528340	5000	*	1.2202
chr2	51783341	51788340	5000	*	1.12482
chr2	51838341	51843340	5000	*	1.18802
chr2	53218340	53223339	5000	*	1.5241
chr2	53233340	53248339	15000	*	1.10315
chr2	53428340	53438339	10000	*	1.15756
chr2	54128339	54138338	10000	*	1.61679
chr2	54348339	54358338	10000	*	1.09021
chr2	54383339	54398338	15000	*	1.15138
chr2	54473339	54478338	5000	*	1.33005
chr2	54573339	54603338	30000	*	1.20624
chr2	55118338	55143337	25000	*	1.13234
chr2	55673338	55688337	15000	*	1.04899
chr2	56423337	56428336	5000	*	1.0561
chr2	56873337	56878336	5000	*	1.08875
chr2	57058337	57068336	10000	*	1.18418
chr2	57288337	57298336	10000	*	1.39388
chr2	58033336	58048335	15000	*	1.41192
chr2	58633336	58663334	29999	*	1.30354
chr2	58783335	58788334	5000	*	1.11008
chr2	58948335	58953334	5000	*	1.47314
chr2	59243335	59248334	5000	*	1.25255
chr2	59348335	59353334	5000	*	1.21485
chr2	59558335	59563334	5000	*	1.08662
chr2	59588335	59598334	10000	*	1.14859
chr2	59858335	59868334	10000	*	1.29635
chr2	60468334	60483333	15000	*	1.04533
chr2	60603334	60608333	5000	*	1.03319
chr2	61183333	61193332	10000	*	1.06784
chr2	61213333	61233332	20000	*	1.11437
chr2	62018333	62023332	5000	*	1.14143
chr2	62243333	62258332	15000	*	1.1002
chr2	62278333	62313332	35000	*	1.03662
chr2	63058332	63063331	5000	*	1.0212
chr2	63433332	63438331	5000	*	1.07551
chr2	63468332	63478331	10000	*	1.3355
chr2	64238331	64243330	5000	*	1.27184
chr2	64753331	64763330	10000	*	1.04664
chr2	64878331	64883330	5000	*	1.23079
chr2	66598329	66613328	15000	*	1.06979
chr2	67198329	67208328	10000	*	1.09332
chr2	67248329	67268328	20000	*	1.25466
chr2	67438329	67458328	20000	*	1.25694
chr2	68078328	68083327	5000	*	1.26994
chr2	68208328	68223327	15000	*	1.49767
chr2	68493328	68503327	10000	*	1.00461
chr2	68823327	68828326	5000	*	1.12379
chr2	68838327	68843326	5000	*	1.08172
chr2	68943327	68968326	25000	*	1.30672
chr2	69173327	69178326	5000	*	1.07721
chr2	69568327	69573326	5000	*	1.1512
chr2	69818327	69843326	25000	*	1.06679
chr2	69928327	69943326	15000	*	1.02073
chr2	69938327	69958326	20000	*	1.35577
chr2	70133326	70143325	10000	*	1.03218
chr2	70183326	70193325	10000	*	1.00323
chr2	70448326	70453325	5000	*	1.29298
chr2	71143326	71163325	20000	*	1.06618
chr2	71193326	71208325	15000	*	1.04075
chr2	71303325	71308324	5000	*	1.30737
chr2	71373325	71378324	5000	*	1.13524
chr2	71628325	71648324	20000	*	1.08788
chr2	71728325	71738324	10000	*	1.2801
chr2	72153325	72158324	5000	*	1.00764
chr2	72328325	72333324	5000	*	1.09185
chr2	72673324	72678323	5000	*	1.1554
chr2	72688324	72698323	10000	*	1.00577
chr2	72738324	72748323	10000	*	1.05115
chr2	73403324	73408323	5000	*	1.34373
chr2	73738324	73783322	44999	*	1.25054
chr2	73938323	73943322	5000	*	1.44909
chr2	74018323	74023322	5000	*	1.1649
chr2	74148323	74153322	5000	*	1.78119
chr2	74463323	74473322	10000	*	1.02985
chr2	74953323	74978322	25000	*	1.07288
chr2	75053322	75058321	5000	*	1.01267
chr2	75138322	75148321	10000	*	1.0015
chr2	75148322	75158321	10000	*	1.19616
chr2	75303322	75308321	5000	*	1.11461
chr2	75323322	75328321	5000	*	1.20958
chr2	75363322	75378321	15000	*	1.066
chr2	75923322	75933321	10000	*	1.03448
chr2	76268322	76273321	5000	*	1.01239
chr2	76658321	76668320	10000	*	1.02219
chr2	76828321	76833320	5000	*	1.22391
chr2	77963320	77973319	10000	*	1.09504
chr2	78018320	78028319	10000	*	1.14349
chr2	78583320	78593319	10000	*	1.14995
chr2	78598320	78603319	5000	*	1.56163
chr2	78743320	78748319	5000	*	1.43402
chr2	79188319	79198318	10000	*	1.55842
chr2	79208319	79213318	5000	*	1.23856
chr2	79788319	79813318	25000	*	1.06702
chr2	79943319	79963318	20000	*	1.13976
chr2	80828318	80833317	5000	*	1.34304
chr2	81653317	81668316	15000	*	1.01654
chr2	81748317	81753316	5000	*	1.09949
chr2	82053317	82083316	30000	*	1.00474
chr2	82118317	82133316	15000	*	1.5076
chr2	82633316	82643315	10000	*	1.10625
chr2	82948316	82953315	5000	*	1.03889
chr2	82988316	83003315	15000	*	1.05498
chr2	83073316	83078315	5000	*	1.17839
chr2	83373316	83378315	5000	*	1.56547
chr2	83548316	83573315	25000	*	1.15788
chr2	83838316	83848315	10000	*	1.39012
chr2	83863315	83888314	25000	*	1.20743
chr2	83993315	83998314	5000	*	1.02371
chr2	84033315	84063314	30000	*	1.20604
chr2	85033315	85038314	5000	*	1.41001
chr2	85158314	85178313	20000	*	1.04697
chr2	86453313	86458312	5000	*	1.50856
chr2	86833313	86838312	5000	*	1.16853
chr2	87413313	87418312	5000	*	1.27991
chr2	90033311	90053310	20000	*	1.1688
chr2	90063311	90083310	20000	*	1.19226
chr2	95148307	95158306	10000	*	1.01967
chr2	95348306	95353305	5000	*	1.05206
chr2	95523306	95528305	5000	*	1.04752
chr2	95738306	95748305	10000	*	1.35749
chr2	96423306	96433305	10000	*	1.02675
chr2	96523305	96528304	5000	*	1.00658
chr2	96538305	96543304	5000	*	1.04242
chr2	96798305	96803304	5000	*	1.23001
chr2	97913304	97928303	15000	*	1.05527
chr2	98348304	98358303	10000	*	1.09398
chr2	99208303	99213302	5000	*	1.06116
chr2	99753303	99768302	15000	*	1.2723
chr2	100263302	100268301	5000	*	1.00824
chr2	100508302	100513301	5000	*	1.17475
chr2	100963302	100968301	5000	*	1.85985
chr2	101403302	101418301	15000	*	1.34298
chr2	101438302	101453301	15000	*	1.28159
chr2	101593301	101598300	5000	*	1.12681
chr2	102103301	102113300	10000	*	1.29297
chr2	102278301	102283300	5000	*	1.00774
chr2	102868300	102878299	10000	*	1.123
chr2	103043300	103048299	5000	*	1.11129
chr2	103458300	103463299	5000	*	1.06095
chr2	103518300	103523299	5000	*	1.08997
chr2	103538300	103548299	10000	*	1.35582
chr2	103758300	103763299	5000	*	1.03722
chr2	104123299	104138298	15000	*	1.22729
chr2	104798299	104808298	10000	*	1.00056
chr2	104828299	104833298	5000	*	1.04961
chr2	104863299	104868298	5000	*	1.17475
chr2	105318298	105323297	5000	*	1.18126
chr2	105718298	105723297	5000	*	1.19403
chr2	105743298	105748297	5000	*	1.01482
chr2	105908298	105918297	10000	*	1.13065
chr2	106358298	106363297	5000	*	1.02531
chr2	106483298	106498297	15000	*	1.06157
chr2	106518298	106523297	5000	*	1.34888
chr2	106533298	106553296	19999	*	1.01995
chr2	106648297	106653296	5000	*	1.02883
chr2	106663297	106668296	5000	*	1.34682
chr2	106698297	106703296	5000	*	1.07154
chr2	106878297	106888296	10000	*	1.30484
chr2	106893297	106903296	10000	*	1.08418
chr2	107733297	107743296	10000	*	1.19313
chr2	107923296	107933295	10000	*	1.02431
chr2	108123296	108128295	5000	*	1.08223
chr2	108168296	108173295	5000	*	1.12648
chr2	108393296	108398295	5000	*	1.03624
chr2	108418296	108423295	5000	*	1.25105
chr2	108538296	108543295	5000	*	1.04196
chr2	108563296	108583295	20000	*	1.18115
chr2	108748296	108753295	5000	*	1.00205
chr2	108938296	108943295	5000	*	1.04919
chr2	109008296	109013295	5000	*	1.16389
chr2	109158295	109163294	5000	*	1.01315
chr2	109278295	109283294	5000	*	1.29166
chr2	109313295	109328294	15000	*	1.13296
chr2	110178295	110198294	20000	*	1.05715
chr2	111458294	111463293	5000	*	1.2943
chr2	111638293	111648292	10000	*	1.43794
chr2	112018293	112033292	15000	*	1.14152
chr2	112808293	112813292	5000	*	1.06285
chr2	112888292	112898291	10000	*	1.0653
chr2	113138292	113148291	10000	*	1.00642
chr2	113488292	113493291	5000	*	1.1102
chr2	113748292	113753291	5000	*	1.20652
chr2	113973292	113983291	10000	*	1.08085
chr2	113988292	113998291	10000	*	1.12486
chr2	114213291	114218290	5000	*	1.07252
chr2	114378291	114383290	5000	*	1.31852
chr2	114963291	114968290	5000	*	1.2234
chr2	114973291	114978290	5000	*	1.2576
chr2	114993291	115003290	10000	*	1.14855
chr2	115133291	115138290	5000	*	1.03964
chr2	115858290	115863289	5000	*	1.10853
chr2	116258290	116263289	5000	*	1.00241
chr2	116458290	116468289	10000	*	1.17894
chr2	116783289	116793288	10000	*	1.26744
chr2	117158289	117163288	5000	*	1.12062
chr2	117178289	117183288	5000	*	1.31976
chr2	117323289	117328288	5000	*	1.14602
chr2	118288288	118293287	5000	*	1.10443
chr2	118703288	118708287	5000	*	1.11817
chr2	119053288	119083287	30000	*	1.06306
chr2	119103288	119108287	5000	*	1.18939
chr2	119113288	119118287	5000	*	1.1859
chr2	119168287	119198286	30000	*	1.09787
chr2	119273287	119278286	5000	*	1.35432
chr2	119323287	119328286	5000	*	1.0148
chr2	119388287	119398286	10000	*	1.07247
chr2	119553287	119573286	20000	*	1.24163
chr2	119583287	119588286	5000	*	1.02198
chr2	119668287	119673286	5000	*	1.04759
chr2	119828287	119833286	5000	*	1.35351
chr2	120128287	120133286	5000	*	1.04196
chr2	120168287	120178286	10000	*	1.30147
chr2	120168287	120173286	5000	*	1.10096
chr2	120503286	120508285	5000	*	1.09777
chr2	120538286	120543285	5000	*	1.02884
chr2	120783286	120788285	5000	*	1.37294
chr2	120938286	120953285	15000	*	1.19562
chr2	120978286	120983285	5000	*	1.10797
chr2	121388286	121393285	5000	*	1.02249
chr2	122188285	122198284	10000	*	1.19513
chr2	122333285	122338284	5000	*	1.17945
chr2	123033284	123038283	5000	*	1.15106
chr2	123228284	123238283	10000	*	1.00313
chr2	123273284	123278283	5000	*	1.4565
chr2	123968284	123983283	15000	*	1.14477
chr2	124633283	124643282	10000	*	1.12681
chr2	125393283	125398282	5000	*	1.46578
chr2	125788282	125793281	5000	*	1.26645
chr2	125908282	125913281	5000	*	1.0708
chr2	126133282	126143281	10000	*	1.00098
chr2	126523282	126543281	20000	*	1.04172
chr2	126598282	126603281	5000	*	1.26641
chr2	127088281	127098280	10000	*	1.14569
chr2	127208281	127213280	5000	*	1.11526
chr2	128403280	128413279	10000	*	1.19421
chr2	128733280	128748279	15000	*	1.23476
chr2	128868280	128873279	5000	*	1.17624
chr2	129638279	129648278	10000	*	1.38932
chr2	129803279	129843278	40000	*	1.05161
chr2	130258279	130268278	10000	*	1.6771
chr2	130953278	130988277	35000	*	1.0048
chr2	131328278	131333277	5000	*	1.0596
chr2	132218277	132223276	5000	*	1.08338
chr2	132593277	132598276	5000	*	1.25919
chr2	132948277	132958276	10000	*	1.14194
chr2	133268276	133278275	10000	*	1.08694
chr2	133288276	133298275	10000	*	1.54858
chr2	133378276	133393275	15000	*	1.16133
chr2	133398276	133418275	20000	*	1.19832
chr2	133533276	133538275	5000	*	1.02719
chr2	133663276	133678275	15000	*	1.04943
chr2	133733276	133748275	15000	*	1.38948
chr2	133798276	133803275	5000	*	1.09846
chr2	133813276	133818275	5000	*	1.05237
chr2	134723275	134728274	5000	*	1.00208
chr2	134788275	134793274	5000	*	1.29033
chr2	134833275	134838274	5000	*	1.17161
chr2	134908275	134918274	10000	*	1.11784
chr2	135223275	135263274	40000	*	1.01584
chr2	135553274	135568273	15000	*	1.34088
chr2	135823274	135828273	5000	*	1.16141
chr2	135968274	135973273	5000	*	1.19216
chr2	135988274	135993273	5000	*	1.00995
chr2	136083274	136088273	5000	*	1.03485
chr2	136383274	136388273	5000	*	1.02141
chr2	136483274	136488273	5000	*	1.22894
chr2	136758274	136763273	5000	*	1.13672
chr2	136858273	136863272	5000	*	1.52388
chr2	136918273	136943272	25000	*	1.16855
chr2	137038273	137043272	5000	*	1.1623
chr2	137218273	137223272	5000	*	1.02656
chr2	137278273	137288272	10000	*	1.11783
chr2	137608273	137613272	5000	*	1.43395
chr2	138378272	138388271	10000	*	1.18692
chr2	138838272	138843271	5000	*	1.14855
chr2	139138272	139143271	5000	*	1.0541
chr2	140003271	140008270	5000	*	1.02274
chr2	140043271	140048270	5000	*	1.00657
chr2	140588270	140593269	5000	*	1.1011
chr2	140708270	140718269	10000	*	1.00435
chr2	140863270	140873269	10000	*	1.30899
chr2	141818270	141823269	5000	*	1.01267
chr2	141953269	141958268	5000	*	1.00608
chr2	142048269	142053268	5000	*	1.0329
chr2	142128269	142143268	15000	*	1.16777
chr2	142268269	142273268	5000	*	1.02333
chr2	142363269	142378268	15000	*	1.04538
chr2	142433269	142448268	15000	*	1.00905
chr2	142513269	142523268	10000	*	1.20992
chr2	142943269	142953268	10000	*	1.2066
chr2	143033269	143043268	10000	*	1.03977
chr2	143608268	143613267	5000	*	1.02388
chr2	144118268	144123267	5000	*	1.0561
chr2	144283268	144288267	5000	*	1.13665
chr2	145143267	145148266	5000	*	1.0176
chr2	145853266	145858265	5000	*	1.00798
chr2	145978266	145988265	10000	*	1.25709
chr2	146058266	146068265	10000	*	1.24561
chr2	146333266	146343265	10000	*	1.23115
chr2	146633266	146638265	5000	*	1.15652
chr2	147013265	147018264	5000	*	1.4569
chr2	147068265	147078264	10000	*	1.76957
chr2	147113265	147118264	5000	*	1.00384
chr2	147753265	147768264	15000	*	1.20179
chr2	147778265	147783264	5000	*	1.26401
chr2	147953265	147963264	10000	*	1.00721
chr2	148018265	148023264	5000	*	1.15176
chr2	148623264	148653263	30000	*	1.09246
chr2	148643264	148663263	20000	*	1.21975
chr2	149028264	149033263	5000	*	1.40868
chr2	149418263	149458262	40000	*	1.90862
chr2	149523263	149533262	10000	*	1.34259
chr2	150043263	150048262	5000	*	1.03915
chr2	150508263	150523262	15000	*	1.03789
chr2	151978261	151983260	5000	*	1.16815
chr2	152443261	152448260	5000	*	1.18167
chr2	152458261	152473260	15000	*	1.05012
chr2	152518261	152523260	5000	*	1.08458
chr2	152973261	152978260	5000	*	1.10786
chr2	153428260	153438259	10000	*	1.16679
chr2	153838260	153853259	15000	*	1.16196
chr2	154018260	154023259	5000	*	1.03755
chr2	154033260	154038259	5000	*	1.13552
chr2	154043260	154048259	5000	*	1.38008
chr2	154053260	154058259	5000	*	1.12089
chr2	154063260	154073259	10000	*	1.04753
chr2	154263260	154273259	10000	*	1.24653
chr2	154363260	154373259	10000	*	1.30423
chr2	154368260	154373259	5000	*	1.31973
chr2	154473259	154478258	5000	*	1.25731
chr2	154488259	154498258	10000	*	1.66471
chr2	154528259	154533258	5000	*	1.21437
chr2	154973259	154978258	5000	*	1.11611
chr2	155563259	155573258	10000	*	1.18068
chr2	155873258	155878257	5000	*	1.0653
chr2	156383258	156388257	5000	*	1.32189
chr2	156858258	156873257	15000	*	1.25923
chr2	156983257	156993256	10000	*	1.09197
chr2	157818257	157828256	10000	*	1.0865
chr2	157853257	157858256	5000	*	1.29838
chr2	158128257	158133256	5000	*	1.31338
chr2	158363256	158373255	10000	*	1.08357
chr2	158858256	158863255	5000	*	1.02183
chr2	158873256	158878255	5000	*	1.15355
chr2	159073256	159083255	10000	*	1.02565
chr2	159238256	159243255	5000	*	1.39463
chr2	159353256	159363255	10000	*	1.05947
chr2	159438256	159453255	15000	*	1.17768
chr2	159663255	159673254	10000	*	1.30441
chr2	159993255	160003254	10000	*	1.32264
chr2	160883254	160888253	5000	*	1.32315
chr2	160918254	160928253	10000	*	1.30352
chr2	161003254	161013253	10000	*	1.27085
chr2	161423254	161428253	5000	*	1.15046
chr2	161468254	161478253	10000	*	1.07469
chr2	161523254	161533253	10000	*	1.09984
chr2	161833254	161838253	5000	*	1.04288
chr2	161883254	161898253	15000	*	1.01816
chr2	162043253	162048252	5000	*	1.326
chr2	162058253	162063252	5000	*	1.16333
chr2	162143253	162148252	5000	*	1.21124
chr2	162583253	162588252	5000	*	1.30493
chr2	162643253	162648252	5000	*	1.1621
chr2	163478252	163493251	15000	*	1.67149
chr2	163678252	163683251	5000	*	1.17945
chr2	163753252	163758251	5000	*	1.08667
chr2	164113252	164118251	5000	*	1.23261
chr2	164648251	164653250	5000	*	1.07001
chr2	165418251	165428250	10000	*	1.01098
chr2	165438251	165443250	5000	*	1.14569
chr2	165613251	165623250	10000	*	1.06573
chr2	165643251	165648250	5000	*	1.07112
chr2	166013250	166028249	15000	*	1.42418
chr2	166123250	166128249	5000	*	1.02946
chr2	166468250	166478249	10000	*	1.06748
chr2	166653250	166658249	5000	*	1.37448
chr2	166953250	166958249	5000	*	1.32085
chr2	167128249	167138248	10000	*	1.13701
chr2	167383249	167398248	15000	*	1.12538
chr2	167468249	167488248	20000	*	1.61342
chr2	167563249	167568248	5000	*	1.10645
chr2	167633249	167638248	5000	*	1.01371
chr2	167783249	167788248	5000	*	1.41135
chr2	168113249	168118248	5000	*	1.0701
chr2	168448248	168468247	20000	*	1.30116
chr2	168523248	168533247	10000	*	1.21243
chr2	168878248	168888247	10000	*	1.43242
chr2	169203248	169208247	5000	*	1.02221
chr2	169578247	169588246	10000	*	1.31089
chr2	169918247	169923246	5000	*	1.34189
chr2	169928247	169938246	10000	*	1.02495
chr2	169963247	169968246	5000	*	1.05197
chr2	169998247	170013246	15000	*	1.0534
chr2	170018247	170033246	15000	*	1.00111
chr2	170053247	170068246	15000	*	1.17783
chr2	170813247	170848245	34999	*	1.13307
chr2	170933246	170938245	5000	*	1.04747
chr2	171258246	171263245	5000	*	1.1993
chr2	171413246	171418245	5000	*	1.01445
chr2	171518246	171523245	5000	*	1.05243
chr2	171528246	171538245	10000	*	1.02556
chr2	172128245	172138244	10000	*	1.02591
chr2	172143245	172148244	5000	*	1.14445
chr2	172253245	172258244	5000	*	1.26659
chr2	172488245	172498244	10000	*	1.11546
chr2	172678245	172708244	30000	*	1.03909
chr2	172858245	172863244	5000	*	1.30677
chr2	173348245	173353244	5000	*	1.12783
chr2	173533244	173538243	5000	*	1.0916
chr2	173693244	173698243	5000	*	1.13711
chr2	173928244	173943243	15000	*	1.08184
chr2	174658243	174673242	15000	*	1.03637
chr2	174728243	174738242	10000	*	1.35868
chr2	174803243	174808242	5000	*	1.00119
chr2	174878243	174888242	10000	*	1.03306
chr2	174908243	174928242	20000	*	1.33837
chr2	175088243	175103242	15000	*	1.30725
chr2	175223243	175228242	5000	*	1.22563
chr2	175418243	175423242	5000	*	1.03784
chr2	175738243	175743242	5000	*	1.00613
chr2	175753243	175758242	5000	*	1.11884
chr2	175868243	175888241	19999	*	1.19521
chr2	175978242	175983241	5000	*	1.11755
chr2	177043242	177048241	5000	*	1.07191
chr2	177158241	177168240	10000	*	1.00073
chr2	177423241	177438240	15000	*	1.13958
chr2	177868241	177873240	5000	*	1.0487
chr2	178083241	178088240	5000	*	1.06962
chr2	178243241	178248240	5000	*	1.10488
chr2	178388241	178393240	5000	*	1.27912
chr2	179648240	179668238	19999	*	1.29388
chr2	179798239	179808238	10000	*	1.43267
chr2	180103239	180118238	15000	*	1.31828
chr2	180128239	180133238	5000	*	1.50695
chr2	180203239	180213238	10000	*	1.08366
chr2	181188238	181198237	10000	*	1.09901
chr2	181508238	181513237	5000	*	1.03995
chr2	182538237	182548236	10000	*	1.04972
chr2	182658237	182673236	15000	*	1.43223
chr2	184318236	184328235	10000	*	1.25019
chr2	184328236	184333235	5000	*	1.07539
chr2	184673236	184683235	10000	*	1.27211
chr2	184893235	184898234	5000	*	1.02388
chr2	185003235	185013234	10000	*	1.03624
chr2	185178235	185183234	5000	*	1.33951
chr2	185208235	185213234	5000	*	1.78798
chr2	185258235	185263234	5000	*	1.24109
chr2	185688235	185693234	5000	*	1.02283
chr2	186063234	186083233	20000	*	1.0299
chr2	186173234	186178233	5000	*	1.27538
chr2	186583234	186593233	10000	*	1.03098
chr2	186948234	186953233	5000	*	1.11385
chr2	187723233	187728232	5000	*	1.07011
chr2	187753233	187758232	5000	*	1.29298
chr2	187993233	188003232	10000	*	1.27844
chr2	188433233	188443232	10000	*	1.21531
chr2	188628232	188633231	5000	*	1.30273
chr2	188918232	188923231	5000	*	1.52067
chr2	189023232	189028231	5000	*	1.42343
chr2	189203232	189218231	15000	*	1.09212
chr2	189618232	189623231	5000	*	1.2326
chr2	189783231	189798230	15000	*	1.03369
chr2	189813231	189823230	10000	*	1.08067
chr2	190738231	190753230	15000	*	1.26515
chr2	190978231	190983230	5000	*	1.18327
chr2	191198230	191203229	5000	*	1.12239
chr2	191553230	191563229	10000	*	1.1834
chr2	192468229	192483228	15000	*	1.27686
chr2	192563229	192568228	5000	*	1.41956
chr2	193178229	193183228	5000	*	1.2577
chr2	193398229	193403228	5000	*	1.00814
chr2	193413229	193418228	5000	*	1.05626
chr2	194463228	194473227	10000	*	1.14801
chr2	195923227	195928226	5000	*	1.19392
chr2	195963227	195978226	15000	*	1.1387
chr2	196423226	196428225	5000	*	2.05644
chr2	196433226	196438225	5000	*	1.16556
chr2	196728226	196738225	10000	*	1.01218
chr2	196803226	196813225	10000	*	1.28439
chr2	196973226	196978225	5000	*	1.05613
chr2	197328225	197333224	5000	*	1.14707
chr2	197773225	197783224	10000	*	1.01072
chr2	198033225	198038224	5000	*	1.02854
chr2	198418225	198423224	5000	*	1.01956
chr2	198468225	198478224	10000	*	1.12218
chr2	198618224	198628223	10000	*	1.29643
chr2	198953224	198968223	15000	*	1.36813
chr2	199193224	199198223	5000	*	1.24069
chr2	199258224	199268223	10000	*	1.12188
chr2	200073223	200078222	5000	*	1.02931
chr2	200263223	200273222	10000	*	1.24534
chr2	200678223	200688222	10000	*	1.13155
chr2	200833223	200838222	5000	*	1.06633
chr2	200853223	200863222	10000	*	1.02581
chr2	200853223	200858222	5000	*	1.03625
chr2	200878223	200883222	5000	*	1.16817
chr2	201258222	201263221	5000	*	1.19441
chr2	201503222	201508221	5000	*	1.06509
chr2	201828222	201833221	5000	*	1.03087
chr2	201958222	201963221	5000	*	1.25922
chr2	202423221	202433220	10000	*	1.15704
chr2	202483221	202493220	10000	*	1.05947
chr2	202498221	202503220	5000	*	1.01643
chr2	202563221	202578220	15000	*	1.04665
chr2	202728221	202738220	10000	*	1.07561
chr2	202808221	202818220	10000	*	1.17233
chr2	202893221	202898220	5000	*	1.11038
chr2	203208221	203213220	5000	*	1.3024
chr2	203383221	203388220	5000	*	1.48588
chr2	203603221	203613220	10000	*	1.01739
chr2	203733220	203738219	5000	*	1.72972
chr2	204233220	204248219	15000	*	1.38591
chr2	204238220	204243219	5000	*	1.11057
chr2	204383220	204398219	15000	*	1.07289
chr2	204863220	204868219	5000	*	1.02285
chr2	204943219	204948218	5000	*	1.2291
chr2	204953219	204968218	15000	*	1.16721
chr2	204958219	204963218	5000	*	1.05116
chr2	205248219	205253218	5000	*	1.19476
chr2	205263219	205273218	10000	*	1.136
chr2	205503219	205508218	5000	*	1.0553
chr2	205823219	205828218	5000	*	1.18236
chr2	206398218	206408217	10000	*	1.02883
chr2	206568218	206573217	5000	*	1.278
chr2	206588218	206593217	5000	*	1.77696
chr2	206813218	206828217	15000	*	1.1029
chr2	206968218	206973217	5000	*	1.07024
chr2	207273218	207278217	5000	*	1.00255
chr2	207568217	207573216	5000	*	1.00671
chr2	207628217	207633216	5000	*	1.31365
chr2	207863217	207868216	5000	*	1.08852
chr2	208298217	208308216	10000	*	1.28553
chr2	208423217	208428216	5000	*	1.40728
chr2	208508217	208513216	5000	*	1.27845
chr2	208693216	208698215	5000	*	1.18179
chr2	208703216	208713215	10000	*	1.11891
chr2	209068216	209073215	5000	*	1.20745
chr2	209133216	209138215	5000	*	1.16216
chr2	209258216	209268215	10000	*	1.15626
chr2	209908216	209913215	5000	*	1.02175
chr2	210263215	210278214	15000	*	1.09856
chr2	210518215	210523214	5000	*	1.1011
chr2	211658214	211663213	5000	*	1.34663
chr2	212073214	212078213	5000	*	1.08076
chr2	212608213	212613212	5000	*	1.04513
chr2	212768213	212773212	5000	*	1.52369
chr2	212983213	212993212	10000	*	1.10979
chr2	213178213	213188212	10000	*	1.03864
chr2	213298213	213303212	5000	*	1.05772
chr2	213848212	213863211	15000	*	1.10568
chr2	213898212	213903211	5000	*	1.04947
chr2	214573212	214578211	5000	*	1.14613
chr2	214713212	214718211	5000	*	1.4475
chr2	215488211	215493210	5000	*	1.03054
chr2	216348210	216358209	10000	*	1.15223
chr2	216388210	216393209	5000	*	1.02698
chr2	216443210	216453209	10000	*	1.07343
chr2	216793210	216803209	10000	*	1.2767
chr2	217638209	217648208	10000	*	1.22729
chr2	217973209	217978208	5000	*	1.22817
chr2	218623209	218628208	5000	*	1.07871
chr2	218633209	218663208	30000	*	1.03332
chr2	218828208	218853207	25000	*	1.21531
chr2	218893208	218903207	10000	*	1.26676
chr2	218928208	218943207	15000	*	1.03221
chr2	219018208	219023207	5000	*	1.08952
chr2	219468208	219478207	10000	*	1.11953
chr2	219518208	219523207	5000	*	1.2058
chr2	219628208	219633207	5000	*	1.15695
chr2	220453207	220458206	5000	*	1.0821
chr2	220988207	220993206	5000	*	1.21455
chr2	221068207	221083206	15000	*	1.00708
chr2	221223207	221233206	10000	*	1.1796
chr2	221898206	221908205	10000	*	1.15566
chr2	222063206	222068205	5000	*	1.08925
chr2	222133206	222148205	15000	*	1.05796
chr2	222358206	222388205	30000	*	1.02386
chr2	222358206	222363205	5000	*	1.69134
chr2	222393206	222398205	5000	*	1.23913
chr2	223388205	223393204	5000	*	1.32607
chr2	223748205	223753204	5000	*	1.00059
chr2	223803204	223823203	20000	*	1.05839
chr2	223963204	224008203	45000	*	1.09978
chr2	224128204	224148203	20000	*	1.05539
chr2	224713204	224718203	5000	*	1.21964
chr2	224748204	224763203	15000	*	1.7512
chr2	225228203	225248202	20000	*	1.27991
chr2	225573203	225588202	15000	*	1.07626
chr2	225593203	225603202	10000	*	1.03223
chr2	225853203	225858202	5000	*	1.03662
chr2	226013203	226018202	5000	*	1.11962
chr2	226253203	226263202	10000	*	1.10866
chr2	226533202	226538201	5000	*	1.11362
chr2	227098202	227108201	10000	*	1.34036
chr2	227208202	227213201	5000	*	1.07358
chr2	227488202	227503201	15000	*	1.15536
chr2	227643201	227653200	10000	*	1.59546
chr2	227938201	227953200	15000	*	1.02432
chr2	228128201	228133200	5000	*	1.10179
chr2	228228201	228238200	10000	*	1.20909
chr2	229043200	229048199	5000	*	1.23041
chr2	229313200	229318199	5000	*	1.02955
chr2	229363200	229378199	15000	*	1.29273
chr2	229698200	229708199	10000	*	1.49012
chr2	231238199	231248198	10000	*	1.11279
chr2	231428198	231433197	5000	*	1.04404
chr2	231513198	231533197	20000	*	1.06598
chr2	231603198	231613197	10000	*	1.03809
chr2	232188198	232203197	15000	*	1.13585
chr2	232673197	232693196	20000	*	1.18708
chr2	232938197	232943196	5000	*	1.79011
chr2	233553197	233558196	5000	*	1.06846
chr2	233943196	233948195	5000	*	1.3169
chr2	234403196	234413195	10000	*	1.049
chr2	234453196	234458195	5000	*	1.17753
chr2	234538196	234548195	10000	*	1.3625
chr2	234708196	234713195	5000	*	1.42184
chr2	234843196	234848195	5000	*	1.41152
chr2	235018196	235048195	30000	*	1.49706
chr2	235403195	235408194	5000	*	1.07372
chr2	235453195	235458194	5000	*	1.18959
chr2	235653195	235663194	10000	*	1.44166
chr2	235868195	235873194	5000	*	1.03972
chr2	236233195	236238194	5000	*	1.04027
chr2	236398194	236403193	5000	*	1.26827
chr2	236573194	236583193	10000	*	1.23365
chr2	236683194	236708193	25000	*	1.07748
chr2	236818194	236838193	20000	*	1.04935
chr2	236823194	236833193	10000	*	1.13468
chr2	236908194	236913193	5000	*	1.01141
chr2	237053194	237058193	5000	*	1.2505
chr2	237403194	237408193	5000	*	1.29881
chr2	237468194	237478193	10000	*	1.2251
chr2	237593194	237598193	5000	*	1.1206
chr2	238173193	238193192	20000	*	1.04353
chr2	238308193	238318192	10000	*	1.00631
chr2	238348193	238358192	10000	*	1.05453
chr2	238668193	238683192	15000	*	1.26752
chr2	238873193	238878192	5000	*	1.29298
chr2	238903193	238923191	19999	*	1.11167
chr2	239363192	239368191	5000	*	1.11359
chr2	239703192	239708191	5000	*	1.33983
chr2	239818192	239843191	25000	*	1.17166
chr2	239988192	239993191	5000	*	1.05143
chr2	240343191	240348190	5000	*	1.25263
chr2	240383191	240393190	10000	*	1.09235
chr2	240448191	240458190	10000	*	1.6059
chr2	240733191	240738190	5000	*	1.11469
chr2	241773190	241788189	15000	*	1.23426
chr2	241953190	241958189	5000	*	1.04391
chr2	242023190	242033189	10000	*	1.80577
chr3	229661	239660	10000	*	1.00869
chr3	594660	599659	5000	*	1.07112
chr3	999660	1004659	5000	*	1.00881
chr3	1234660	1244659	10000	*	1.08941
chr3	1359660	1369659	10000	*	1.3065
chr3	1594660	1599659	5000	*	1.04566
chr3	2139659	2149658	10000	*	1.48279
chr3	2319659	2324658	5000	*	1.19361
chr3	2499659	2504658	5000	*	1.09971
chr3	2509659	2514658	5000	*	1.13066
chr3	2849659	2869658	20000	*	1.09538
chr3	3004659	3009658	5000	*	1.04419
chr3	3139658	3144657	5000	*	1.09712
chr3	3294658	3299657	5000	*	1.07593
chr3	3319658	3329657	10000	*	1.79067
chr3	3444658	3449657	5000	*	1.00031
chr3	3729658	3734657	5000	*	1.39914
chr3	3784658	3799657	15000	*	1.01271
chr3	3914658	3919657	5000	*	1.39583
chr3	4359657	4364656	5000	*	1.45048
chr3	4579657	4589656	10000	*	1.12704
chr3	4664657	4669656	5000	*	1.00072
chr3	4679657	4684656	5000	*	1.06251
chr3	6019656	6024655	5000	*	1.24065
chr3	6244656	6254655	10000	*	1.24428
chr3	6314656	6319655	5000	*	1.26543
chr3	6884655	6894654	10000	*	1.10701
chr3	7179655	7184654	5000	*	1.06378
chr3	7374655	7379654	5000	*	1.42431
chr3	7384655	7389654	5000	*	1.02388
chr3	7439655	7449654	10000	*	1.07201
chr3	7454655	7459654	5000	*	1.19325
chr3	9189654	9199653	10000	*	1.15157
chr3	9379653	9389652	10000	*	1.06638
chr3	9569653	9574652	5000	*	1.12657
chr3	9654653	9659652	5000	*	1.52802
chr3	9784653	9794652	10000	*	1.01143
chr3	9829653	9849652	20000	*	1.09467
chr3	9899653	9904652	5000	*	1.41571
chr3	9949653	9954652	5000	*	1.22943
chr3	10119653	10124652	5000	*	1.1211
chr3	10224653	10229652	5000	*	1.0842
chr3	10579653	10609651	29999	*	1.08614
chr3	11174652	11179651	5000	*	1.19364
chr3	11254652	11264651	10000	*	1.21888
chr3	11814652	11824651	10000	*	1.53706
chr3	11924651	11929650	5000	*	1.24604
chr3	11974651	11979650	5000	*	1.0038
chr3	12759651	12764650	5000	*	1.22405
chr3	13019651	13024650	5000	*	1.19541
chr3	13044651	13059650	15000	*	1.07671
chr3	13089651	13104650	15000	*	1.38922
chr3	13234650	13239649	5000	*	1.07908
chr3	13279650	13289649	10000	*	1.10399
chr3	13579650	13584649	5000	*	1.52504
chr3	13669650	13684649	15000	*	1.06752
chr3	13779650	13789649	10000	*	1.16721
chr3	14054650	14064649	10000	*	1.51966
chr3	14069650	14079649	10000	*	1.18126
chr3	14279650	14294649	15000	*	1.22729
chr3	14544649	14549648	5000	*	1.14059
chr3	14729649	14734648	5000	*	1.24174
chr3	14884649	14894648	10000	*	1.1295
chr3	14989649	14994648	5000	*	1.1133
chr3	15019649	15039648	20000	*	1.08718
chr3	15059649	15069648	10000	*	1.20571
chr3	15189649	15194648	5000	*	1.04386
chr3	16034648	16049647	15000	*	1.00763
chr3	16354648	16359647	5000	*	1.04434
chr3	16704648	16709647	5000	*	1.35579
chr3	16974647	16979646	5000	*	1.0966
chr3	17354647	17369646	15000	*	1.2094
chr3	17479647	17484646	5000	*	1.26543
chr3	17609647	17644646	35000	*	1.09504
chr3	17889647	17894646	5000	*	1.25218
chr3	18679646	18689645	10000	*	1.03456
chr3	19294646	19309645	15000	*	1.04483
chr3	19514645	19519644	5000	*	1.77687
chr3	20609645	20614644	5000	*	1.13047
chr3	21599644	21609643	10000	*	1.19522
chr3	21684644	21714643	30000	*	1.00477
chr3	21704644	21709643	5000	*	1.09021
chr3	21934643	21954642	20000	*	1.02946
chr3	22054643	22074642	20000	*	1.29644
chr3	22084643	22089642	5000	*	1.3338
chr3	22219643	22224642	5000	*	1.23145
chr3	22354643	22359642	5000	*	1.51443
chr3	23539642	23549641	10000	*	1.48551
chr3	23574642	23579641	5000	*	1.07553
chr3	24259642	24264641	5000	*	1.0136
chr3	24754641	24759640	5000	*	1.1534
chr3	24859641	24869640	10000	*	1.19391
chr3	25129641	25134640	5000	*	1.02805
chr3	25304641	25314640	10000	*	1.45864
chr3	25389641	25399640	10000	*	1.11954
chr3	25459641	25464640	5000	*	1.00141
chr3	25539641	25549640	10000	*	1.16644
chr3	26059640	26064639	5000	*	1.2457
chr3	26169640	26184639	15000	*	1.02466
chr3	26269640	26279639	10000	*	1.17285
chr3	26334640	26339639	5000	*	1.21831
chr3	26459640	26464639	5000	*	1.11188
chr3	26574640	26579639	5000	*	1.63283
chr3	26669640	26674639	5000	*	1.00224
chr3	27494639	27499638	5000	*	1.12372
chr3	27704639	27709638	5000	*	1.02095
chr3	27789639	27794638	5000	*	1.05841
chr3	28294638	28319637	25000	*	1.10566
chr3	28669638	28684637	15000	*	1.10188
chr3	28869638	28874637	5000	*	1.13541
chr3	29029638	29034637	5000	*	1.05026
chr3	29179638	29184637	5000	*	1.21506
chr3	29279638	29289637	10000	*	1.06251
chr3	29609637	29619636	10000	*	1.20456
chr3	29644637	29649636	5000	*	1.00456
chr3	29699637	29709636	10000	*	1.48222
chr3	30559637	30569636	10000	*	1.13942
chr3	30639637	30654636	15000	*	1.43197
chr3	30889636	30894635	5000	*	1.23428
chr3	31054636	31059635	5000	*	1.00353
chr3	31244636	31249635	5000	*	1.10103
chr3	31959636	31964635	5000	*	1.0615
chr3	32344635	32354634	10000	*	1.27676
chr3	32719635	32724634	5000	*	1.0572
chr3	32909635	32914634	5000	*	1.08499
chr3	33009635	33014634	5000	*	1.24778
chr3	33089635	33094634	5000	*	1.03032
chr3	33534634	33549633	15000	*	1.05606
chr3	33609634	33639633	30000	*	1.03876
chr3	33869634	33879633	10000	*	1.4446
chr3	34554633	34569632	15000	*	1.18678
chr3	34769633	34784632	15000	*	1.47667
chr3	34814633	34819632	5000	*	1.06758
chr3	35059633	35069632	10000	*	1.5852
chr3	35134633	35139632	5000	*	1.34088
chr3	35194633	35199632	5000	*	1.01789
chr3	35374633	35389632	15000	*	1.90001
chr3	36179632	36189631	10000	*	1.45169
chr3	36194632	36199631	5000	*	1.14047
chr3	36249632	36254631	5000	*	1.08424
chr3	36479632	36484631	5000	*	1.04969
chr3	36614632	36619631	5000	*	1.5606
chr3	37219631	37229630	10000	*	1.10625
chr3	37414631	37424630	10000	*	1.17166
chr3	37434631	37439630	5000	*	1.01964
chr3	37709631	37714630	5000	*	1.25345
chr3	38079631	38094630	15000	*	1.16015
chr3	38694630	38699629	5000	*	1.08306
chr3	39659629	39664628	5000	*	1.36147
chr3	40029629	40034628	5000	*	1.07553
chr3	40029629	40034628	5000	*	1.07146
chr3	40694629	40729628	35000	*	1.08291
chr3	41709628	41719627	10000	*	1.10184
chr3	42094628	42109626	14999	*	1.26913
chr3	42124627	42129626	5000	*	1.13696
chr3	42284627	42304626	20000	*	1.25633
chr3	42419627	42424626	5000	*	1.22219
chr3	42524627	42529626	5000	*	1.07949
chr3	42964627	42969626	5000	*	1.26031
chr3	43904626	43914625	10000	*	1.35139
chr3	43939626	43944625	5000	*	1.08079
chr3	44309626	44319625	10000	*	1.61955
chr3	44639625	44644624	5000	*	1.45172
chr3	44939625	44944624	5000	*	1.25917
chr3	44959625	44969624	10000	*	1.06381
chr3	45029625	45054624	25000	*	1.00631
chr3	45169625	45174624	5000	*	1.002
chr3	45279625	45289624	10000	*	1.04931
chr3	45389625	45394624	5000	*	1.69874
chr3	45804625	45809624	5000	*	1.12202
chr3	45844625	45849624	5000	*	1.05859
chr3	45879625	45889623	9999	*	1.22096
chr3	45904624	45919623	15000	*	1.01821
chr3	46619624	46624623	5000	*	1.0087
chr3	47014624	47024623	10000	*	1.18328
chr3	47114624	47124623	10000	*	1.14855
chr3	47349623	47364622	15000	*	1.06763
chr3	47384623	47394622	10000	*	1.35079
chr3	48084623	48089622	5000	*	1.27691
chr3	48159623	48169622	10000	*	1.12301
chr3	48929622	48934621	5000	*	1.38426
chr3	49294622	49299621	5000	*	1.04737
chr3	49429622	49439621	10000	*	1.08395
chr3	49604622	49619621	15000	*	1.0977
chr3	49834621	49839620	5000	*	1.2759
chr3	50194621	50199620	5000	*	1.06172
chr3	50594621	50599620	5000	*	1.14945
chr3	50639621	50644620	5000	*	1.24744
chr3	50784621	50789620	5000	*	1.0931
chr3	50999620	51009619	10000	*	1.11128
chr3	51039620	51044619	5000	*	1.02362
chr3	51599620	51609619	10000	*	1.00154
chr3	51839620	51844619	5000	*	1.1834
chr3	52154620	52164619	10000	*	1.13088
chr3	52474619	52479618	5000	*	1.11496
chr3	52519619	52529618	10000	*	1.12205
chr3	52684619	52699618	15000	*	1.01626
chr3	52904619	52909618	5000	*	1.05816
chr3	52949619	52959618	10000	*	1.23115
chr3	52994619	53009618	15000	*	1.01543
chr3	53069619	53089618	20000	*	1.60935
chr3	53924618	53939617	15000	*	1.36628
chr3	54374618	54394617	20000	*	1.29477
chr3	54459618	54474617	15000	*	1.37716
chr3	54659618	54664617	5000	*	1.6018
chr3	54704618	54709616	4999	*	1.13341
chr3	54804617	54814616	10000	*	1.27036
chr3	55024617	55029616	5000	*	1.14969
chr3	55044617	55049616	5000	*	1.0382
chr3	55614617	55619616	5000	*	1.39185
chr3	55749617	55759616	10000	*	1.01644
chr3	55899617	55904616	5000	*	1.00394
chr3	55914617	55939616	25000	*	1.03225
chr3	56664616	56669615	5000	*	1.11078
chr3	57474615	57479614	5000	*	1.14366
chr3	57624615	57629614	5000	*	1.10752
chr3	57824615	57829614	5000	*	1.10778
chr3	58344615	58349614	5000	*	1.33702
chr3	58639614	58644613	5000	*	1.0148
chr3	59814613	59824612	10000	*	1.40299
chr3	59899613	59929612	30000	*	1.15342
chr3	60049613	60054612	5000	*	1.2478
chr3	60994613	61004612	10000	*	1.04533
chr3	61154612	61159611	5000	*	1.0609
chr3	61274612	61279611	5000	*	1.02921
chr3	61584612	61589611	5000	*	1.04536
chr3	61589612	61624611	35000	*	1.08957
chr3	61649612	61654611	5000	*	1.3573
chr3	61934612	61939611	5000	*	1.05116
chr3	61994612	61999611	5000	*	1.24945
chr3	62264612	62274610	9999	*	1.35378
chr3	62564611	62574610	10000	*	1.15757
chr3	62629611	62634610	5000	*	1.3819
chr3	62834611	62844610	10000	*	1.85156
chr3	63179611	63184610	5000	*	1.39616
chr3	63279611	63289610	10000	*	2.07838
chr3	63509611	63519610	10000	*	1.22047
chr3	64084610	64094609	10000	*	1.07112
chr3	64364610	64369609	5000	*	1.07897
chr3	64454610	64459609	5000	*	1.08739
chr3	64909609	64914608	5000	*	1.50415
chr3	65014609	65019608	5000	*	1.05748
chr3	65154609	65159608	5000	*	1.18745
chr3	65184609	65194608	10000	*	1.04986
chr3	65194609	65199608	5000	*	1.09225
chr3	65759609	65764608	5000	*	1.09986
chr3	65999609	66004608	5000	*	1.16766
chr3	66074608	66079607	5000	*	1.08429
chr3	66099608	66114607	15000	*	1.03023
chr3	66414608	66419607	5000	*	1.40054
chr3	66744608	66749607	5000	*	1.00628
chr3	66969608	66974607	5000	*	1.19148
chr3	66979608	66989607	10000	*	2.18786
chr3	67154608	67164607	10000	*	1.16074
chr3	67624607	67629606	5000	*	1.01294
chr3	67734607	67739606	5000	*	1.64032
chr3	67809607	67819606	10000	*	1.37448
chr3	67894607	67899606	5000	*	1.22061
chr3	68419607	68424606	5000	*	1.03637
chr3	68604606	68614605	10000	*	1.09997
chr3	68714606	68719605	5000	*	1.23845
chr3	68779606	68789605	10000	*	1.214
chr3	68794606	68814605	20000	*	1.11362
chr3	68829606	68839605	10000	*	1.07557
chr3	68884606	68889605	5000	*	1.38811
chr3	69369606	69384605	15000	*	1.06577
chr3	69464606	69469605	5000	*	1.15556
chr3	70179605	70184604	5000	*	1.41787
chr3	70339605	70349604	10000	*	1.03563
chr3	70414605	70419604	5000	*	1.10785
chr3	71029605	71034604	5000	*	1.12649
chr3	71044605	71049604	5000	*	1.11891
chr3	71589604	71594603	5000	*	1.00739
chr3	71639604	71644603	5000	*	1.03146
chr3	71794604	71804603	10000	*	1.44899
chr3	71984604	72009603	25000	*	1.21415
chr3	72374603	72379602	5000	*	1.11946
chr3	72789603	72794602	5000	*	1.01081
chr3	72869603	72884602	15000	*	1.09718
chr3	73094603	73099602	5000	*	1.29713
chr3	73139603	73144602	5000	*	1.07939
chr3	73424603	73429602	5000	*	1.07319
chr3	73549603	73554602	5000	*	1.3003
chr3	73884602	73894601	10000	*	1.13497
chr3	76119601	76124600	5000	*	1.09561
chr3	76174600	76179599	5000	*	1.43662
chr3	76189600	76199599	10000	*	1.34112
chr3	76194600	76204599	10000	*	1.0644
chr3	76204600	76209599	5000	*	1.44956
chr3	76244600	76249599	5000	*	1.25796
chr3	76489600	76499599	10000	*	1.3593
chr3	76514600	76529599	15000	*	1.44852
chr3	76719600	76724599	5000	*	1.05457
chr3	76854600	76864599	10000	*	1.33011
chr3	77094600	77109599	15000	*	1.1324
chr3	77974599	77989598	15000	*	1.01159
chr3	77974599	77979598	5000	*	1.22865
chr3	78054599	78069598	15000	*	1.25764
chr3	78084599	78089598	5000	*	1.32327
chr3	78184599	78189598	5000	*	1.15727
chr3	78499599	78504598	5000	*	1.06641
chr3	78749598	78764597	15000	*	1.47186
chr3	78774598	78789597	15000	*	1.29283
chr3	79149598	79154597	5000	*	1.00126
chr3	79349598	79364597	15000	*	1.22176
chr3	79674598	79684597	10000	*	1.07201
chr3	79894598	79899597	5000	*	1.05626
chr3	80334597	80339596	5000	*	1.08318
chr3	80569597	80574596	5000	*	1.0975
chr3	80914597	80924596	10000	*	1.14039
chr3	80974597	80989596	15000	*	1.04529
chr3	81149597	81154596	5000	*	1.00977
chr3	82754595	82759594	5000	*	1.02104
chr3	82914595	82929594	15000	*	1.18861
chr3	83249595	83254594	5000	*	1.04898
chr3	84789594	84799593	10000	*	1.3625
chr3	84829594	84839593	10000	*	1.02495
chr3	85049593	85064592	15000	*	1.14707
chr3	85619593	85624592	5000	*	1.03112
chr3	85824593	85829592	5000	*	1.15185
chr3	85909593	85924592	15000	*	1.36813
chr3	86309592	86319591	10000	*	1.12672
chr3	86339592	86349591	10000	*	1.52674
chr3	86389592	86394591	5000	*	1.41911
chr3	86544592	86549591	5000	*	1.06554
chr3	86619592	86624591	5000	*	1.07914
chr3	87384592	87399591	15000	*	1.05601
chr3	87499591	87504590	5000	*	1.0745
chr3	87504591	87514590	10000	*	1.23394
chr3	87839591	87859590	20000	*	1.30238
chr3	87974591	87979590	5000	*	1.05455
chr3	88079591	88084590	5000	*	1.21952
chr3	89589590	89594589	5000	*	1.17454
chr3	89644590	89649589	5000	*	1.0221
chr3	90084589	90099588	15000	*	1.03419
chr3	90599589	90604588	5000	*	1.19016
chr3	90694589	90699588	5000	*	1.5755
chr3	90709589	90714588	5000	*	1.02919
chr3	91309588	91314587	5000	*	1.0282
chr3	94384586	94394585	10000	*	1.07177
chr3	94914586	94924585	10000	*	1.3365
chr3	95159585	95174584	15000	*	1.09706
chr3	95349585	95359584	10000	*	1.00404
chr3	95474585	95484584	10000	*	1.0204
chr3	95844585	95849584	5000	*	1.08615
chr3	96694584	96699583	5000	*	1.29644
chr3	96754584	96759583	5000	*	1.22834
chr3	97104584	97114583	10000	*	1.09929
chr3	97544584	97549583	5000	*	1.01875
chr3	97659583	97669582	10000	*	1.08801
chr3	97789583	97799582	10000	*	1.04759
chr3	97994583	98014582	20000	*	1.05987
chr3	98579583	98594582	15000	*	1.21964
chr3	98659583	98664582	5000	*	1.09424
chr3	98704583	98714582	10000	*	1.00283
chr3	98734583	98739582	5000	*	1.08382
chr3	99494582	99499581	5000	*	1.28184
chr3	99889582	99899581	10000	*	1.26295
chr3	100604581	100619580	15000	*	1.24419
chr3	100779581	100799580	20000	*	1.08707
chr3	101269581	101274580	5000	*	1.04402
chr3	101944580	101954579	10000	*	1.3275
chr3	102289580	102304579	15000	*	1.14124
chr3	103034579	103044578	10000	*	1.25476
chr3	103294579	103304578	10000	*	1.17666
chr3	104114578	104139577	25000	*	1.071
chr3	104204578	104209577	5000	*	1.10474
chr3	104589578	104599577	10000	*	1.04738
chr3	104689578	104694577	5000	*	1.09863
chr3	104869578	104874577	5000	*	1.40763
chr3	105419577	105424576	5000	*	1.01197
chr3	105434577	105444576	10000	*	1.136
[truncated: 10,526 more rows]

## Sheet: H3K27me3_SW1116
chr1	15001	20000	5000	*	1.91853
chr1	790001	800000	10000	*	1.5524
chr1	815001	820000	5000	*	1.24124
chr1	945001	960000	15000	*	1.09924
chr1	970001	975000	5000	*	1.1328
chr1	1005001	1010000	5000	*	1.35469
chr1	1020001	1025000	5000	*	1.12158
chr1	1030001	1045000	15000	*	1.20468
chr1	1210001	1245000	35000	*	1.34152
chr1	1250001	1255000	5000	*	1.14862
chr1	1545000	1554999	10000	*	1.10786
chr1	1680000	1694999	15000	*	1.24852
chr1	1835000	1839999	5000	*	1.23824
chr1	1840000	1854999	15000	*	1.06768
chr1	1880000	1889999	10000	*	1.2784
chr1	1900000	1904999	5000	*	1.09487
chr1	2150000	2154999	5000	*	1.19453
chr1	2200000	2204999	5000	*	1.0958
chr1	2340000	2344999	5000	*	1.22279
chr1	2395000	2404999	10000	*	1.10532
chr1	3014999	3019998	5000	*	1.09207
chr1	3049999	3059998	10000	*	1.38487
chr1	3249999	3299998	50000	*	1.03008
chr1	4049998	4054997	5000	*	1.28398
chr1	4064998	4074997	10000	*	1.33028
chr1	4234998	4249997	15000	*	1.07281
chr1	4814998	4819997	5000	*	1.01165
chr1	4969998	4974997	5000	*	1.01799
chr1	5574997	5579996	5000	*	1.17921
chr1	5974997	6014996	40000	*	1.00417
chr1	6779996	6784995	5000	*	1.02792
chr1	6804996	6809995	5000	*	1.00914
chr1	7039996	7049995	10000	*	1.14634
chr1	7344996	7359995	15000	*	1.3371
chr1	7584995	7599994	15000	*	1.30314
chr1	7959995	7964994	5000	*	1.03661
chr1	7969995	7974994	5000	*	1.17789
chr1	9179994	9189993	10000	*	1.06597
chr1	9409994	9414993	5000	*	1.11309
chr1	9649994	9654993	5000	*	1.29581
chr1	9679994	9699993	20000	*	1.92544
chr1	9759994	9769993	10000	*	1.77939
chr1	10844993	10849992	5000	*	1.19098
chr1	10894993	10899992	5000	*	1.09152
chr1	11159993	11164992	5000	*	1.2632
chr1	11639992	11654991	15000	*	1.16849
chr1	11664992	11674991	10000	*	1.57085
chr1	11834992	11839991	5000	*	1.00938
chr1	12029992	12034991	5000	*	1.30113
chr1	12584992	12589991	5000	*	1.02097
chr1	13564991	13579990	15000	*	1.01204
chr1	13624991	13634990	10000	*	1.05631
chr1	13904990	13909989	5000	*	1.03463
chr1	13989990	13994989	5000	*	1.02618
chr1	14059990	14064989	5000	*	1.01091
chr1	14134990	14139989	5000	*	1.10034
chr1	14249990	14254989	5000	*	1.23977
chr1	14314990	14319989	5000	*	1.15139
chr1	14409990	14419989	10000	*	1.06839
chr1	14424990	14439989	15000	*	1.05466
chr1	14504990	14509989	5000	*	1.22373
chr1	14814990	14819989	5000	*	1.03846
chr1	15989989	16009988	20000	*	1.38571
chr1	16579988	16584987	5000	*	1.08597
chr1	16854988	16859987	5000	*	1.11075
chr1	17264988	17279987	15000	*	1.02118
chr1	17514988	17529987	15000	*	1.04294
chr1	18034987	18039986	5000	*	1.21223
chr1	18344987	18349986	5000	*	1.03064
chr1	18409987	18424986	15000	*	1.09667
chr1	18519987	18524986	5000	*	1.04135
chr1	18599987	18604986	5000	*	1.10329
chr1	19029986	19044985	15000	*	1.01083
chr1	19189986	19194985	5000	*	1.01983
chr1	19384986	19389985	5000	*	1.12931
chr1	19699986	19704985	5000	*	1.06733
chr1	20679985	20694984	15000	*	1.00189
chr1	20909985	20914984	5000	*	1.00313
chr1	21049985	21059984	10000	*	1.08309
chr1	21144985	21149984	5000	*	1.40946
chr1	21529984	21534983	5000	*	1.45885
chr1	23229983	23249982	20000	*	1.05562
chr1	23709983	23729982	20000	*	1.01256
chr1	23769983	23774982	5000	*	1.02323
chr1	24044982	24049981	5000	*	1.05123
chr1	24784982	24789981	5000	*	1.15568
chr1	25859981	25884980	25000	*	1.41325
chr1	26254981	26294980	40000	*	1.05537
chr1	26794980	26814979	20000	*	1.11845
chr1	26824980	26844979	20000	*	1.12548
chr1	27009980	27014979	5000	*	1.01353
chr1	27519980	27529979	10000	*	1.0297
chr1	27529980	27534979	5000	*	1.06268
chr1	27989979	27994978	5000	*	1.05523
chr1	28129979	28139978	10000	*	1.01373
chr1	28239979	28244978	5000	*	1.28965
chr1	29179978	29214977	35000	*	1.19017
chr1	29624978	29629977	5000	*	1.23564
chr1	29664978	29669977	5000	*	1.28598
chr1	30104978	30109977	5000	*	1.10395
chr1	30344977	30349976	5000	*	1.00547
chr1	30484977	30489976	5000	*	1.10897
chr1	30529977	30539976	10000	*	1.02931
chr1	30544977	30549976	5000	*	1.26752
chr1	31069977	31074976	5000	*	1.34993
chr1	31224977	31249976	25000	*	1.21523
chr1	32159976	32164975	5000	*	1.06593
chr1	33329975	33334974	5000	*	1.07491
chr1	33354975	33359974	5000	*	1.00634
chr1	34139974	34144973	5000	*	1.01896
chr1	34674974	34679973	5000	*	1.18328
chr1	35204974	35209973	5000	*	1.05387
chr1	35209974	35214973	5000	*	1.01147
chr1	35559973	35564972	5000	*	1.10374
chr1	35614973	35619972	5000	*	1.30172
chr1	36024973	36049972	25000	*	1.03524
chr1	36299973	36304972	5000	*	1.05584
chr1	37939971	37959970	20000	*	1.02466
chr1	38059971	38074970	15000	*	1.07069
chr1	40079970	40089969	10000	*	1.06787
chr1	41234969	41239968	5000	*	1.02942
chr1	42694968	42699967	5000	*	1.01947
chr1	44029967	44034966	5000	*	1.24803
chr1	44414966	44419965	5000	*	1.04239
chr1	45389965	45394964	5000	*	1.0127
chr1	45564965	45574964	10000	*	1.3275
chr1	45769965	45789964	20000	*	1.07187
chr1	46569965	46589964	20000	*	1.41653
chr1	46844964	46849963	5000	*	1.00806
chr1	47319964	47324963	5000	*	1.15158
chr1	47559964	47564963	5000	*	1.31545
chr1	49009963	49014962	5000	*	1.18787
chr1	49909962	49914961	5000	*	1.2698
chr1	49994962	50019961	25000	*	1.10444
chr1	50379962	50384961	5000	*	1.07703
chr1	51019961	51024960	5000	*	1.06449
chr1	51344961	51354960	10000	*	1.02564
chr1	54449958	54454957	5000	*	1.04892
chr1	57509956	57519955	10000	*	1.03315
chr1	57519956	57524955	5000	*	1.03276
chr1	58229955	58239954	10000	*	1.38057
chr1	58579955	58594954	15000	*	1.003
chr1	58794955	58799954	5000	*	1.0213
chr1	59369954	59379953	10000	*	1.01566
chr1	61369953	61374952	5000	*	1.25823
chr1	62169952	62199951	30000	*	1.15093
chr1	62214952	62219951	5000	*	1.09683
chr1	63314951	63329950	15000	*	1.03716
chr1	63349951	63354950	5000	*	1.20222
chr1	63664951	63674950	10000	*	1.09692
chr1	63694951	63699950	5000	*	1.45298
chr1	63729951	63739950	10000	*	1.91852
chr1	63779951	63784950	5000	*	1.18254
chr1	63934951	63939950	5000	*	1.01891
chr1	63984951	63999950	15000	*	1.13162
chr1	64009951	64014950	5000	*	1.46331
chr1	64049951	64054950	5000	*	1.39887
chr1	64054951	64064950	10000	*	1.11719
chr1	64354950	64359949	5000	*	1.10486
chr1	64369950	64379949	10000	*	1.47447
chr1	64384950	64389949	5000	*	1.47793
chr1	64394950	64399949	5000	*	1.1341
chr1	64409950	64419949	10000	*	1.40339
chr1	64784950	64799949	15000	*	1.18888
chr1	64894950	64904949	10000	*	1.14377
chr1	64939950	64944949	5000	*	1.02154
chr1	65029950	65034949	5000	*	1.31675
chr1	65084950	65094949	10000	*	1.02787
chr1	65209950	65214949	5000	*	1.50718
chr1	65234950	65239949	5000	*	1.03196
chr1	65864949	65869948	5000	*	1.19312
chr1	66299949	66304948	5000	*	1.15542
chr1	66504949	66514948	10000	*	1.1699
chr1	66999948	67029947	30000	*	1.04834
chr1	67094948	67099947	5000	*	1.16558
chr1	67169948	67174947	5000	*	1.04143
chr1	67714948	67719947	5000	*	1.01489
chr1	67749948	67754947	5000	*	1.02765
chr1	67879948	67889947	10000	*	1.03293
chr1	67909948	67914947	5000	*	1.01068
chr1	67924948	67934947	10000	*	1.03522
chr1	68289947	68294946	5000	*	1.20928
chr1	68374947	68384946	10000	*	1.11433
chr1	68684947	68689946	5000	*	1.00336
chr1	69174947	69179946	5000	*	1.00686
chr1	69644946	69649945	5000	*	1.26282
chr1	70689945	70704944	15000	*	1.0419
chr1	71059945	71069944	10000	*	1.03435
chr1	72844944	72854943	10000	*	1.01102
chr1	73174943	73179942	5000	*	1.04551
chr1	73189943	73194942	5000	*	1.2084
chr1	73389943	73399942	10000	*	1.19649
chr1	75759941	75769940	10000	*	1.08588
chr1	76134941	76139940	5000	*	1.11039
chr1	76244941	76249940	5000	*	1.0171
chr1	76494941	76514940	20000	*	1.16472
chr1	76659941	76674940	15000	*	1.17486
chr1	76799941	76809940	10000	*	1.07058
chr1	78029940	78044939	15000	*	1.10546
chr1	78244939	78249938	5000	*	1.06466
chr1	78659939	78664938	5000	*	1.01247
chr1	79359939	79364938	5000	*	1.06533
chr1	80739937	80744936	5000	*	1.03787
chr1	80959937	80984936	25000	*	1.20886
chr1	83329935	83334934	5000	*	1.06786
chr1	83339935	83349934	10000	*	1.18658
chr1	85074934	85094933	20000	*	1.01349
chr1	85609934	85619933	10000	*	1.14383
chr1	87969932	87974931	5000	*	1.16253
chr1	89249931	89254930	5000	*	1.11499
chr1	89869930	89874929	5000	*	1.11164
chr1	90069930	90074929	5000	*	1.22492
chr1	90094930	90114929	20000	*	1.02341
chr1	90389930	90394929	5000	*	1.11336
chr1	90414930	90419929	5000	*	1.35624
chr1	90859929	90864928	5000	*	1.03313
chr1	90864929	90869928	5000	*	1.05438
chr1	91154929	91159928	5000	*	1.05157
chr1	91649929	91654928	5000	*	1.04338
chr1	91899929	91909928	10000	*	1.38577
chr1	91924929	91929928	5000	*	1.00878
chr1	91989929	91994928	5000	*	1.21786
chr1	92034928	92039927	5000	*	1.04032
chr1	92039928	92054927	15000	*	1.23202
chr1	92314928	92319927	5000	*	1.06351
chr1	92359928	92389927	30000	*	1.32243
chr1	92389928	92399927	10000	*	1.23319
chr1	92629928	92634927	5000	*	1.36544
chr1	93324927	93334926	10000	*	1.09408
chr1	93604927	93614926	10000	*	1.03639
chr1	93814927	93819926	5000	*	1.09649
chr1	94214927	94234926	20000	*	1.02849
chr1	95684926	95689925	5000	*	1.1362
chr1	96074925	96079924	5000	*	1.10297
chr1	96219925	96229924	10000	*	1.26883
chr1	96284925	96299924	15000	*	1.11818
chr1	96349925	96364924	15000	*	1.03894
chr1	96429925	96434924	5000	*	1.04904
chr1	98614923	98624922	10000	*	1.06592
chr1	99584923	99594921	9999	*	1.03201
chr1	99719922	99724921	5000	*	1.00157
chr1	100289922	100294921	5000	*	1.03313
chr1	100699922	100704921	5000	*	1.00441
chr1	100814922	100819921	5000	*	1.00718
chr1	100909921	100914920	5000	*	1.00444
chr1	100954921	100969920	15000	*	1.18851
chr1	101094921	101099920	5000	*	1.27038
chr1	101254921	101264920	10000	*	1.00691
chr1	101374921	101394920	20000	*	1.12258
chr1	101694921	101704920	10000	*	1.04884
chr1	102109921	102119919	9999	*	1.162
chr1	102204920	102219919	15000	*	1.07375
chr1	102269920	102284919	15000	*	1.02171
chr1	102874920	102879919	5000	*	1.07739
chr1	102994920	103004919	10000	*	1.12149
chr1	104089919	104104918	15000	*	1.26123
chr1	104414919	104419918	5000	*	1.10535
chr1	104534919	104544918	10000	*	1.08874
chr1	105464918	105469917	5000	*	1.00346
chr1	105569918	105574917	5000	*	1.06893
chr1	105734918	105749917	15000	*	1.05278
chr1	107419916	107444915	25000	*	1.17666
chr1	107894916	107919915	25000	*	1.01802
chr1	110379914	110389913	10000	*	1.13369
chr1	110714914	110719913	5000	*	1.00721
chr1	110739914	110744913	5000	*	1.04905
chr1	111834913	111844912	10000	*	1.24144
chr1	111924913	111929912	5000	*	1.13447
chr1	111964913	111969912	5000	*	1.21446
chr1	112864912	112874911	10000	*	1.11933
chr1	113239912	113244911	5000	*	1.01277
chr1	113264912	113274911	10000	*	1.1047
chr1	113324912	113329911	5000	*	1.02666
chr1	114129911	114134910	5000	*	1.01502
chr1	114234911	114239910	5000	*	1.25165
chr1	114324911	114329910	5000	*	1.07296
chr1	114359911	114369910	10000	*	1.1107
chr1	114644911	114654910	10000	*	1.11959
chr1	114709911	114719909	9999	*	1.20955
chr1	115579910	115584909	5000	*	1.0279
chr1	116739909	116744908	5000	*	1.00667
chr1	116914909	116924908	10000	*	1.18632
chr1	116949909	116954908	5000	*	1.10915
chr1	117084909	117094908	10000	*	1.0696
chr1	117124909	117154908	30000	*	1.11799
chr1	117249908	117259907	10000	*	1.46107
chr1	117494908	117499907	5000	*	1.25725
chr1	117769908	117774907	5000	*	1.12878
chr1	118119908	118129907	10000	*	1.01395
chr1	118654907	118674906	20000	*	1.01152
chr1	118699907	118704906	5000	*	1.01407
chr1	118759907	118764906	5000	*	1.00104
chr1	119014907	119039906	25000	*	1.51475
chr1	119304907	119309906	5000	*	1.29222
chr1	119674907	119684906	10000	*	1.08927
chr1	119744907	119749906	5000	*	1.32032
chr1	119769906	119779905	10000	*	1.37639
chr1	120164906	120169905	5000	*	1.23281
chr1	121529905	121544904	15000	*	1.08767
chr1	145644886	145649885	5000	*	1.02665
chr1	146424885	146429884	5000	*	1.0712
chr1	146639885	146644884	5000	*	1.01314
chr1	147239885	147259884	20000	*	1.09979
chr1	147579884	147589883	10000	*	1.14141
chr1	149974883	149979882	5000	*	1.20694
chr1	150074882	150099881	25000	*	1.28949
chr1	150209882	150214881	5000	*	1.0295
chr1	150249882	150254881	5000	*	1.19186
chr1	150334882	150344881	10000	*	1.0054
chr1	150379882	150384881	5000	*	1.22738
chr1	150559882	150569881	10000	*	1.10764
chr1	151319881	151324880	5000	*	1.08978
chr1	151614881	151619880	5000	*	1.0018
chr1	151644881	151649880	5000	*	1.11011
chr1	151784881	151789880	5000	*	1.18569
chr1	151919881	151924880	5000	*	1.11802
chr1	152389881	152394880	5000	*	1.02796
chr1	152394881	152399880	5000	*	1.48873
chr1	152479881	152489880	10000	*	1.04966
chr1	152779880	152784879	5000	*	1.01295
chr1	153094880	153104879	10000	*	1.23583
chr1	153374880	153384879	10000	*	1.1328
chr1	153784880	153804878	19999	*	1.1001
chr1	154099879	154104878	5000	*	1.01238
chr1	154814879	154819878	5000	*	1.03909
chr1	155019879	155024878	5000	*	1.00267
chr1	155164878	155174877	10000	*	1.27301
chr1	155184878	155199877	15000	*	1.22263
chr1	155244878	155249877	5000	*	1.24192
chr1	155634878	155644877	10000	*	1.03924
chr1	155884878	155889877	5000	*	1.17055
chr1	156429877	156434876	5000	*	1.17656
chr1	156559877	156564876	5000	*	1.19071
chr1	156599877	156614876	15000	*	1.05851
chr1	156789877	156794876	5000	*	1.04054
chr1	157044877	157074876	30000	*	1.11932
chr1	157134877	157139876	5000	*	1.01285
chr1	157364877	157369876	5000	*	1.00123
chr1	158634876	158639875	5000	*	1.08018
chr1	158799876	158804875	5000	*	1.19387
chr1	159119875	159124874	5000	*	1.31301
chr1	159609875	159624874	15000	*	1.13979
chr1	159649875	159664874	15000	*	1.17663
chr1	159909875	159914874	5000	*	1.05834
chr1	160019875	160029874	10000	*	1.54242
chr1	160194874	160209873	15000	*	1.65163
chr1	160719874	160734873	15000	*	1.03888
chr1	160899874	160904873	5000	*	1.17778
chr1	161674873	161679872	5000	*	1.03647
chr1	161769873	161774872	5000	*	1.0802
chr1	162304873	162309872	5000	*	1.2303
chr1	162319873	162329872	10000	*	1.00446
chr1	162339873	162344872	5000	*	1.08716
chr1	162644872	162649871	5000	*	1.01164
chr1	163114872	163129871	15000	*	1.1414
chr1	163499872	163504871	5000	*	1.23973
chr1	163749872	163754871	5000	*	1.07274
chr1	163924871	163929870	5000	*	1.04357
chr1	164014871	164019870	5000	*	1.03719
chr1	164024871	164029870	5000	*	1.07904
chr1	164354871	164369870	15000	*	1.25905
chr1	164714871	164729870	15000	*	1.32382
chr1	165169870	165174869	5000	*	1.01567
chr1	165544870	165549869	5000	*	1.10633
chr1	166039870	166044869	5000	*	1.02512
chr1	166659869	166674868	15000	*	1.41596
chr1	166914869	166919868	5000	*	1.04939
chr1	167099869	167104868	5000	*	1.41235
chr1	167274869	167279868	5000	*	1.22231
chr1	167354869	167359868	5000	*	1.13817
chr1	167549869	167554868	5000	*	1.62102
chr1	168019868	168024867	5000	*	1.10287
chr1	168334868	168339867	5000	*	1.07261
chr1	169119867	169124866	5000	*	1.15891
chr1	169364867	169374866	10000	*	1.03698
chr1	169644867	169649866	5000	*	1.01469
chr1	169689867	169694866	5000	*	1.07514
chr1	170279866	170289865	10000	*	1.07167
chr1	170484866	170494865	10000	*	1.04036
chr1	170999866	171004865	5000	*	1.11483
chr1	171094866	171104865	10000	*	1.11629
chr1	172339865	172344864	5000	*	1.53622
chr1	172954864	172959863	5000	*	1.00659
chr1	173269864	173274863	5000	*	1.0243
chr1	173409864	173414863	5000	*	1.01504
chr1	174574863	174579862	5000	*	1.51268
chr1	174594863	174604862	10000	*	1.2605
chr1	174604863	174609862	5000	*	1.07332
chr1	174759863	174774862	15000	*	1.27215
chr1	174814863	174829862	15000	*	1.05135
chr1	174829863	174839862	10000	*	1.00789
chr1	174854863	174864862	10000	*	1.4106
chr1	175194863	175199862	5000	*	1.08315
chr1	175904862	175924861	20000	*	1.00709
chr1	176004862	176014861	10000	*	1.25949
chr1	176174862	176179861	5000	*	1.06242
chr1	176334862	176354861	20000	*	1.0081
chr1	176774861	176779860	5000	*	1.19243
chr1	176884861	176894860	10000	*	1.10414
chr1	177964860	177969859	5000	*	1.59826
chr1	178714860	178729859	15000	*	1.27252
chr1	178909860	178914859	5000	*	1.0018
chr1	179099859	179104858	5000	*	1.13931
chr1	179389859	179394858	5000	*	1.06493
chr1	179779859	179784858	5000	*	1.47729
chr1	180404858	180409857	5000	*	1.06724
chr1	181389858	181394857	5000	*	1.25354
chr1	181789857	181794856	5000	*	1.16467
chr1	181859857	181879856	20000	*	1.09214
chr1	181904857	181909856	5000	*	1.17757
chr1	182274857	182279856	5000	*	1.00795
chr1	182499857	182504856	5000	*	1.15313
chr1	182504857	182509856	5000	*	1.13261
chr1	182529857	182534856	5000	*	1.11638
chr1	182659857	182669856	10000	*	1.47364
chr1	182859856	182879855	20000	*	1.00029
chr1	183259856	183264855	5000	*	1.1047
chr1	183519856	183529855	10000	*	1.03058
chr1	183569856	183584855	15000	*	1.01927
chr1	183584856	183589855	5000	*	1.08693
chr1	183629856	183639855	10000	*	1.2667
chr1	184029856	184034855	5000	*	1.01547
chr1	184784855	184809854	25000	*	1.18578
chr1	184829855	184834854	5000	*	1.13182
chr1	184969855	184984854	15000	*	1.02438
chr1	184994855	184999854	5000	*	1.46331
chr1	185089855	185094854	5000	*	1.05786
chr1	185959854	185964853	5000	*	1.06491
chr1	185969854	185989853	20000	*	1.09145
chr1	186309854	186314853	5000	*	1.05038
chr1	186549854	186554853	5000	*	1.02266
chr1	186784853	186789852	5000	*	1.06626
chr1	187134853	187139852	5000	*	1.02429
chr1	188014852	188019851	5000	*	1.02636
chr1	188099852	188104851	5000	*	1.02199
chr1	188734852	188749851	15000	*	1.09245
chr1	188754852	188764851	10000	*	1.04599
chr1	188974852	188979851	5000	*	1.04678
chr1	189119851	189124850	5000	*	1.0382
chr1	189134851	189144850	10000	*	1.04639
chr1	189299851	189304850	5000	*	1.14543
chr1	189399851	189404850	5000	*	1.34164
chr1	189579851	189584850	5000	*	1.15149
chr1	189634851	189644850	10000	*	1.03692
chr1	189754851	189764850	10000	*	1.1806
chr1	190459850	190469849	10000	*	1.07951
chr1	191264850	191269849	5000	*	1.08102
chr1	191519850	191534849	15000	*	1.29581
chr1	191714849	191729848	15000	*	1.07871
chr1	191914849	191929848	15000	*	1.02081
chr1	192114849	192124848	10000	*	1.53919
chr1	192194849	192199848	5000	*	1.2651
chr1	192464849	192484848	20000	*	1.00141
chr1	192494849	192499848	5000	*	1.03594
chr1	192774849	192779848	5000	*	1.08499
chr1	192819849	192829848	10000	*	1.01118
chr1	192909848	192919847	10000	*	1.22729
chr1	193914848	193919847	5000	*	1.08191
chr1	194209847	194214846	5000	*	1.57841
chr1	194379847	194384846	5000	*	1.20378
chr1	194814847	194829846	15000	*	1.39176
chr1	194919847	194934846	15000	*	1.18396
chr1	195214847	195234846	20000	*	1.06343
chr1	195444846	195449845	5000	*	1.19425
chr1	195714846	195719845	5000	*	1.04551
chr1	195774846	195784845	10000	*	1.12715
chr1	195794846	195799845	5000	*	1.13112
chr1	196079846	196084845	5000	*	1.37656
chr1	196374846	196394845	20000	*	1.27216
chr1	196624846	196639845	15000	*	1.19136
chr1	196884845	196889844	5000	*	1.61262
chr1	197019845	197029844	10000	*	1.19012
chr1	198184844	198194843	10000	*	1.13074
chr1	198489844	198504843	15000	*	1.06592
chr1	198694844	198699843	5000	*	1.08231
chr1	199124844	199129843	5000	*	1.09329
chr1	199559843	199569842	10000	*	1.04158
chr1	200349843	200354842	5000	*	1.21743
chr1	200649842	200664841	15000	*	1.27079
chr1	200789842	200829841	40000	*	1.33181
chr1	201154842	201159841	5000	*	1.01005
chr1	201504842	201509841	5000	*	1.07541
chr1	201529842	201549841	20000	*	1.03753
chr1	201729841	201734840	5000	*	1.05901
chr1	201829841	201844840	15000	*	1.06879
chr1	202499841	202509840	10000	*	1.16152
chr1	202554841	202559840	5000	*	1.03023
chr1	203369840	203374839	5000	*	1.02872
chr1	203464840	203469839	5000	*	1.05163
chr1	203569840	203574839	5000	*	1.10251
chr1	204504839	204514838	10000	*	1.07538
chr1	205699838	205709837	10000	*	1.18855
chr1	206754837	206759836	5000	*	1.10285
chr1	207264837	207269836	5000	*	1.27268
chr1	208799836	208809835	10000	*	1.0538
chr1	209214836	209219835	5000	*	1.01358
chr1	209489835	209499834	10000	*	1.38344
chr1	209979835	209984834	5000	*	1.36197
chr1	210189835	210199834	10000	*	1.666
chr1	210519835	210524834	5000	*	1.09492
chr1	210794834	210799833	5000	*	1.00604
chr1	211789833	211794832	5000	*	1.22657
chr1	211924833	211929832	5000	*	1.15293
chr1	211984833	211989832	5000	*	1.16196
chr1	212384833	212389832	5000	*	1.24908
chr1	212459833	212464832	5000	*	1.07843
chr1	212554833	212559832	5000	*	1.11147
chr1	212689833	212694832	5000	*	1.15178
chr1	213024833	213029832	5000	*	1.02995
chr1	213759832	213769831	10000	*	1.31437
chr1	214194832	214204831	10000	*	1.22336
chr1	215164831	215169830	5000	*	1.1001
chr1	215384831	215389830	5000	*	1.14573
chr1	215714830	215719829	5000	*	1.31763
chr1	215879830	215894829	15000	*	1.03248
chr1	216064830	216074829	10000	*	1.04141
chr1	216094830	216099829	5000	*	1.12922
chr1	216349830	216364829	15000	*	1.15425
chr1	217099829	217104828	5000	*	1.13056
chr1	217319829	217324828	5000	*	1.55893
chr1	217764829	217769828	5000	*	1.02261
chr1	217854829	217884828	30000	*	1.22503
chr1	218419828	218424827	5000	*	1.01848
chr1	218479828	218494827	15000	*	1.10752
chr1	218649828	218654827	5000	*	1.10877
chr1	218964828	218974827	10000	*	1.33016
chr1	219884827	219889826	5000	*	1.75609
chr1	220479827	220484826	5000	*	1.00435
chr1	220529827	220534826	5000	*	1.35876
chr1	220644826	220664825	20000	*	1.2245
chr1	220774826	220779825	5000	*	1.22149
chr1	221849826	221874824	24999	*	1.00122
chr1	221984825	221989824	5000	*	1.49187
chr1	222139825	222149824	10000	*	1.23337
chr1	222409825	222414824	5000	*	1.00321
chr1	222714825	222744824	30000	*	1.05224
chr1	222954825	222969824	15000	*	1.02316
chr1	223144824	223149823	5000	*	1.00281
chr1	223424824	223449823	25000	*	1.49882
chr1	223519824	223534823	15000	*	1.13736
chr1	224654823	224669822	15000	*	1.03197
chr1	225074823	225084822	10000	*	1.10884
chr1	226789822	226794821	5000	*	1.19427
chr1	227364821	227369820	5000	*	1.27617
chr1	227369821	227374820	5000	*	1.04774
chr1	227499821	227519820	20000	*	1.12466
chr1	227644821	227649820	5000	*	1.01945
chr1	227754821	227764820	10000	*	1.10939
chr1	228019821	228024820	5000	*	1.08713
chr1	228044821	228054820	10000	*	1.04298
chr1	228294820	228299819	5000	*	1.17006
chr1	228769820	228779819	10000	*	1.04915
chr1	228929820	228934819	5000	*	1.00787
chr1	229154820	229159819	5000	*	1.00234
chr1	229339820	229359819	20000	*	1.11953
chr1	229599819	229604818	5000	*	1.02937
chr1	229874819	229879818	5000	*	1.32606
chr1	230864818	230874817	10000	*	1.0707
chr1	231259818	231269817	10000	*	1.05762
chr1	231739818	231749817	10000	*	1.45734
chr1	231919818	231924817	5000	*	1.03128
chr1	232614817	232629816	15000	*	1.0289
chr1	233619816	233639815	20000	*	1.52328
chr1	234164816	234174815	10000	*	1.10223
chr1	234199816	234219815	20000	*	1.0568
chr1	234754815	234759814	5000	*	1.10055
chr1	236214814	236224813	10000	*	1.00018
chr1	236934814	236939813	5000	*	1.03403
chr1	237924813	237939812	15000	*	1.01786
chr1	238064813	238069812	5000	*	1.17201
chr1	238264812	238269811	5000	*	1.18322
chr1	238524812	238534811	10000	*	1.01279
chr1	238789812	238794811	5000	*	1.09167
chr1	238989812	238994811	5000	*	1.43944
chr1	239764811	239769810	5000	*	1.19829
chr1	239804811	239809810	5000	*	1.2521
chr1	239909811	239934810	25000	*	1.05453
chr1	240349811	240354810	5000	*	1.13273
chr1	240639811	240664810	25000	*	1.00695
chr1	240734811	240739810	5000	*	1.23388
chr1	241179810	241189809	10000	*	1.00828
chr1	241269810	241279809	10000	*	1.30387
chr1	241509810	241519809	10000	*	1.13186
chr1	241624810	241634809	10000	*	1.02317
chr1	242019810	242024809	5000	*	1.35706
chr1	242264809	242274808	10000	*	1.16979
chr1	242509809	242514808	5000	*	1.06046
chr1	243654808	243659807	5000	*	1.04278
chr1	243964808	243974807	10000	*	1.04955
chr1	244194808	244214807	20000	*	1.05205
chr1	244294808	244304807	10000	*	1.11734
chr1	245064807	245069806	5000	*	1.24879
chr1	245299807	245304806	5000	*	1.16236
chr1	245414807	245429806	15000	*	1.07867
chr1	245634807	245639806	5000	*	1.06889
chr1	245899806	245909805	10000	*	1.07503
chr1	246004806	246024805	20000	*	1.09411
chr1	246639806	246644805	5000	*	1.34006
chr1	246799806	246809805	10000	*	1.06917
chr1	247844805	247849804	5000	*	1.04747
chr1	247969805	247974804	5000	*	1.15749
chr1	248254805	248264804	10000	*	1.13467
chr2	568382	573381	5000	*	1.16585
chr2	838381	843380	5000	*	1.49931
chr2	1193381	1208380	15000	*	1.17335
chr2	2218380	2223379	5000	*	1.10967
chr2	2318380	2328379	10000	*	1.49489
chr2	2558380	2563379	5000	*	1.02428
chr2	2593380	2603379	10000	*	1.25288
chr2	2843380	2853379	10000	*	1.22651
chr2	3123380	3133379	10000	*	1.28159
chr2	3198379	3208378	10000	*	1.06069
chr2	3208379	3213378	5000	*	1.62474
chr2	3773379	3778378	5000	*	1.25045
chr2	3898379	3903378	5000	*	1.00814
chr2	4088379	4098378	10000	*	1.32624
chr2	4663378	4668377	5000	*	1.09811
chr2	5278378	5293377	15000	*	1.29096
chr2	5463378	5488377	25000	*	1.03556
chr2	5548378	5563377	15000	*	1.0737
chr2	5868377	5878376	10000	*	1.27662
chr2	6068377	6078376	10000	*	1.14553
chr2	6143377	6153376	10000	*	1.04843
chr2	6218377	6233376	15000	*	1.36467
chr2	6263377	6273376	10000	*	1.06326
chr2	6278377	6283376	5000	*	1.18138
chr2	6518377	6523376	5000	*	1.36377
chr2	7078376	7083375	5000	*	1.24377
chr2	7208376	7213375	5000	*	1.14001
chr2	7218376	7228375	10000	*	1.02147
chr2	7488376	7503375	15000	*	1.08419
chr2	7678376	7693375	15000	*	1.22012
chr2	7718376	7723375	5000	*	1.18739
chr2	7753376	7758375	5000	*	1.11142
chr2	7873376	7878375	5000	*	1.14527
chr2	7958376	7968375	10000	*	1.32664
chr2	7998376	8008375	10000	*	1.12447
chr2	8188376	8193375	5000	*	1.31358
chr2	8193376	8198375	5000	*	1.19449
chr2	8333375	8343374	10000	*	1.18003
chr2	9483374	9488373	5000	*	1.16702
chr2	10308374	10313373	5000	*	1.11479
chr2	10758373	10773372	15000	*	1.36676
chr2	10853373	10858372	5000	*	1.07139
chr2	10948373	10953372	5000	*	1.22811
chr2	11068373	11078372	10000	*	1.04235
chr2	12028372	12033371	5000	*	1.04611
chr2	12318372	12323371	5000	*	1.06339
chr2	12338372	12358371	20000	*	1.00603
chr2	12703372	12708371	5000	*	1.12172
chr2	13813371	13818370	5000	*	1.00841
chr2	14228371	14233370	5000	*	1.00426
chr2	14303371	14318370	15000	*	1.02974
chr2	14383371	14388370	5000	*	1.03254
chr2	15153370	15158369	5000	*	1.0959
chr2	15168370	15178369	10000	*	1.17456
chr2	15323370	15333369	10000	*	1.20672
chr2	16638369	16648368	10000	*	1.2082
chr2	17153368	17163367	10000	*	1.32315
chr2	17228368	17233367	5000	*	1.23028
chr2	17928368	17948367	20000	*	1.15712
chr2	17968368	17973367	5000	*	1.647
chr2	18438367	18443366	5000	*	1.27575
chr2	19213367	19218366	5000	*	1.07679
chr2	20878365	20883364	5000	*	1.30136
chr2	21853365	21863364	10000	*	1.05797
chr2	22903364	22923363	20000	*	1.01101
chr2	23273364	23278363	5000	*	1.00045
chr2	23733363	23738362	5000	*	1.32636
chr2	25303362	25308361	5000	*	1.27341
chr2	25528362	25538361	10000	*	1.22514
chr2	26118361	26123360	5000	*	1.06042
chr2	26778361	26783360	5000	*	1.06352
chr2	26833361	26848360	15000	*	1.27565
chr2	26923361	26933360	10000	*	1.13867
chr2	27148360	27163359	15000	*	1.14216
chr2	27218360	27223359	5000	*	1.03777
chr2	27443360	27448359	5000	*	1.25288
chr2	28678359	28688358	10000	*	1.08325
chr2	28738359	28743358	5000	*	1.113
chr2	29543359	29558358	15000	*	1.19382
chr2	30248358	30258357	10000	*	1.06717
chr2	30308358	30328357	20000	*	1.20614
chr2	30893358	30898357	5000	*	1.1081
chr2	31083357	31088356	5000	*	1.08074
chr2	31593357	31633356	40000	*	1.05085
chr2	31978357	31983356	5000	*	1.15091
chr2	32253356	32258355	5000	*	1.19025
chr2	32263356	32268355	5000	*	1.08746
chr2	32413356	32423355	10000	*	1.00887
chr2	32673356	32678355	5000	*	1.00134
chr2	32778356	32783355	5000	*	1.12414
chr2	32788356	32798355	10000	*	1.01185
chr2	32808356	32813355	5000	*	1.02661
chr2	32943356	32953355	10000	*	1.15677
chr2	32973356	32988355	15000	*	1.04163
chr2	33008356	33018355	10000	*	1.08688
chr2	33248356	33253355	5000	*	1.40294
chr2	33438355	33443354	5000	*	1.05857
chr2	33448355	33453354	5000	*	1.09954
chr2	33473355	33478354	5000	*	1.21796
chr2	33498355	33513354	15000	*	1.0032
chr2	33998355	34003354	5000	*	1.23053
chr2	34023355	34028354	5000	*	1.17241
chr2	34273355	34278354	5000	*	1.04515
chr2	34358355	34383354	25000	*	1.02185
chr2	34693354	34698353	5000	*	1.05388
chr2	34793354	34808353	15000	*	1.19425
chr2	34878354	34888353	10000	*	1.06086
chr2	35223354	35233353	10000	*	1.0971
chr2	35483354	35488353	5000	*	1.01221
chr2	35593354	35598353	5000	*	1.27389
chr2	35618354	35623353	5000	*	1.36352
chr2	36213353	36218352	5000	*	1.26784
chr2	36283353	36303352	20000	*	1.32234
chr2	36368353	36373352	5000	*	1.11763
chr2	36503353	36508352	5000	*	1.01504
chr2	36703353	36713352	10000	*	1.21543
chr2	36958353	36973352	15000	*	1.11982
chr2	37343352	37348351	5000	*	1.39736
chr2	37658352	37668351	10000	*	1.28202
chr2	38323352	38328351	5000	*	1.38421
chr2	38388352	38398351	10000	*	1.22715
chr2	39543351	39548350	5000	*	1.12089
chr2	40528350	40538349	10000	*	1.01214
chr2	40678350	40683349	5000	*	1.0128
chr2	41423349	41433348	10000	*	1.4514
chr2	41568349	41573348	5000	*	1.00311
chr2	42153349	42168348	15000	*	1.00802
chr2	42228349	42233348	5000	*	1.02557
chr2	42243349	42253347	9999	*	1.02511
chr2	42468348	42473347	5000	*	1.45728
chr2	43218348	43223347	5000	*	1.0548
chr2	43318348	43323347	5000	*	1.05691
chr2	43428348	43433347	5000	*	1.00289
chr2	44138347	44143346	5000	*	1.08882
chr2	44658347	44683346	25000	*	1.15755
chr2	45238346	45248345	10000	*	1.09645
chr2	45288346	45293345	5000	*	1.20226
chr2	45508346	45518345	10000	*	1.09073
chr2	45718346	45728345	10000	*	1.03499
chr2	45978346	46003345	25000	*	1.07832
chr2	46053345	46058344	5000	*	1.124
chr2	46628345	46633344	5000	*	1.17006
chr2	46738345	46743344	5000	*	1.03342
chr2	47198345	47203344	5000	*	1.05314
chr2	48493344	48498343	5000	*	1.0402
chr2	48548344	48563342	14999	*	1.04914
chr2	48718343	48728342	10000	*	1.07246
chr2	49643343	49648342	5000	*	1.16502
chr2	49928342	49933341	5000	*	1.12489
chr2	50238342	50253341	15000	*	1.37517
chr2	52143341	52158340	15000	*	1.08087
chr2	52328341	52333340	5000	*	1.00031
chr2	52828340	52833339	5000	*	1.03003
chr2	53138340	53143339	5000	*	1.32487
chr2	53328340	53338339	10000	*	1.05267
chr2	54033339	54053338	20000	*	1.17443
chr2	54098339	54103338	5000	*	1.0038
chr2	54358339	54363338	5000	*	1.19495
chr2	55088338	55098337	10000	*	1.09553
chr2	55473338	55478337	5000	*	1.00834
chr2	56358337	56363336	5000	*	1.11695
chr2	57253337	57263336	10000	*	1.1001
chr2	57438336	57443335	5000	*	1.00484
chr2	57698336	57708335	10000	*	1.00215
chr2	57973336	57978335	5000	*	1.03628
chr2	58013336	58018335	5000	*	1.07812
chr2	58218336	58223335	5000	*	1.11644
chr2	58693335	58713334	20000	*	1.09799
chr2	58798335	58803334	5000	*	1.01427
chr2	60043334	60048333	5000	*	1.11863
chr2	60128334	60143333	15000	*	1.29506
chr2	60353334	60368333	15000	*	1.18936
chr2	60503334	60508333	5000	*	1.23909
chr2	60713334	60723333	10000	*	1.3126
chr2	60738334	60743333	5000	*	1.19257
chr2	60818334	60828333	10000	*	1.00357
chr2	61408333	61413332	5000	*	1.25659
chr2	62518332	62528331	10000	*	1.10909
chr2	63573332	63593331	20000	*	1.41432
chr2	63743331	63748330	5000	*	1.0414
chr2	65083330	65088329	5000	*	1.0257
chr2	66588329	66593328	5000	*	1.04269
chr2	66743329	66768328	25000	*	1.03932
chr2	66853329	66858328	5000	*	1.03031
chr2	67053329	67063328	10000	*	1.0029
chr2	67483328	67493327	10000	*	1.02545
chr2	67988328	68018327	30000	*	1.05055
chr2	68198328	68213327	15000	*	1.12371
chr2	68243328	68248327	5000	*	1.20687
chr2	68688328	68693327	5000	*	1.31809
chr2	68698328	68703327	5000	*	1.03698
chr2	69043327	69058326	15000	*	1.14536
chr2	69123327	69133326	10000	*	1.12171
chr2	69418327	69433326	15000	*	1.18581
chr2	69608327	69613326	5000	*	1.04919
chr2	69948327	69988325	39999	*	1.00064
chr2	70078326	70083325	5000	*	1.33284
chr2	70173326	70178325	5000	*	1.04825
chr2	70518326	70523325	5000	*	1.20521
chr2	70823326	70828325	5000	*	1.12165
chr2	73563324	73568323	5000	*	1.07325
chr2	74408323	74433322	25000	*	1.15841
chr2	75023323	75028322	5000	*	1.05456
chr2	75183322	75198321	15000	*	1.22014
chr2	75398322	75418321	20000	*	1.12602
chr2	76773321	76778320	5000	*	1.30484
chr2	76793321	76798320	5000	*	1.00337
chr2	76978321	76988320	10000	*	1.01388
chr2	77173321	77178320	5000	*	1.06717
chr2	77988320	77993319	5000	*	1.10825
chr2	78863319	78883318	20000	*	1.0787
chr2	80663318	80668317	5000	*	1.20413
chr2	80858318	80868317	10000	*	1.25906
chr2	81263318	81278317	15000	*	1.15023
chr2	81848317	81858316	10000	*	1.07197
chr2	82443317	82448316	5000	*	1.08918
chr2	84218315	84223314	5000	*	1.08415
chr2	84298315	84308314	10000	*	1.0977
chr2	84688315	84703314	15000	*	1.08139
chr2	84978315	84983314	5000	*	1.24235
chr2	85008315	85013314	5000	*	1.23304
chr2	85088315	85093314	5000	*	1.05691
chr2	85158314	85163313	5000	*	1.05563
chr2	85253314	85258313	5000	*	1.15346
chr2	86333314	86338313	5000	*	1.01494
chr2	86428313	86443312	15000	*	1.04451
chr2	86523313	86528312	5000	*	1.04071
chr2	87443313	87453312	10000	*	1.1873
chr2	88528312	88538311	10000	*	1.14278
chr2	89183311	89188310	5000	*	1.22645
chr2	89293311	89298310	5000	*	1.19017
chr2	95003307	95008306	5000	*	1.25908
chr2	95018307	95023306	5000	*	1.06937
chr2	96878305	96903304	25000	*	1.00925
chr2	99378303	99388302	10000	*	1.08399
chr2	99393303	99398302	5000	*	1.28834
chr2	100183303	100188302	5000	*	1.2147
chr2	100448302	100458301	10000	*	1.14954
chr2	100658302	100668301	10000	*	1.12745
chr2	100698302	100703301	5000	*	1.20729
chr2	101153302	101163301	10000	*	1.09326
chr2	102133301	102138300	5000	*	1.05227
chr2	102343301	102358300	15000	*	1.01422
chr2	102418301	102428300	10000	*	1.06773
chr2	103813300	103818299	5000	*	1.00579
chr2	104053299	104058298	5000	*	1.56659
chr2	104058299	104063298	5000	*	1.00285
chr2	104478299	104493298	15000	*	1.09282
chr2	105403298	105408297	5000	*	1.03527
chr2	105533298	105543297	10000	*	1.01927
chr2	105678298	105688297	10000	*	1.1664
chr2	105803298	105813297	10000	*	1.14857
chr2	106273298	106298297	25000	*	1.02316
chr2	106583297	106588296	5000	*	1.1819
chr2	106623297	106633296	10000	*	1.11689
chr2	107048297	107053296	5000	*	1.08579
chr2	107678297	107688296	10000	*	1.18331
chr2	107943296	107948295	5000	*	1.07871
chr2	108378296	108383295	5000	*	1.24818
chr2	109083295	109088294	5000	*	1.20236
chr2	109688295	109698294	10000	*	1.04902
chr2	109733295	109738294	5000	*	1.03464
chr2	110148295	110168294	20000	*	1.21882
chr2	110663294	110668293	5000	*	1.2357
chr2	110718294	110723293	5000	*	1.31008
chr2	110768294	110778293	10000	*	1.14571
chr2	110958294	110963293	5000	*	1.23581
chr2	111078294	111093293	15000	*	1.00076
chr2	111208294	111213293	5000	*	1.00079
chr2	111233294	111238293	5000	*	1.04867
chr2	112083293	112088292	5000	*	1.22512
chr2	112118293	112128292	10000	*	1.91853
chr2	112128293	112133292	5000	*	1.27038
chr2	112343293	112353292	10000	*	1.00016
chr2	112493293	112503292	10000	*	1.17555
chr2	112508293	112528292	20000	*	1.47268
chr2	112573293	112578292	5000	*	1.13586
chr2	112663293	112673292	10000	*	1.23051
chr2	112678293	112683292	5000	*	1.05523
chr2	112778293	112783292	5000	*	1.1054
chr2	112833293	112843292	10000	*	1.04689
chr2	113003292	113018291	15000	*	1.22201
chr2	113068292	113073291	5000	*	1.36186
chr2	113268292	113293291	25000	*	1.4389
chr2	113423292	113428291	5000	*	1.04489
chr2	113513292	113518291	5000	*	1.01389
chr2	113858292	113863291	5000	*	1.00645
chr2	113883292	113888291	5000	*	1.3119
chr2	114023292	114028291	5000	*	1.16213
chr2	114098292	114118290	19999	*	1.06508
chr2	114128291	114133290	5000	*	1.14149
chr2	114163291	114173290	10000	*	1.05685
chr2	114203291	114208290	5000	*	1.1919
chr2	114453291	114463290	10000	*	1.00501
chr2	114573291	114588290	15000	*	1.35854
chr2	114943291	114973290	30000	*	1.17042
chr2	115143291	115148290	5000	*	1.01911
chr2	115188291	115193290	5000	*	1.07303
chr2	115218291	115233290	15000	*	1.09776
chr2	115263291	115268290	5000	*	1.14177
chr2	115303291	115313290	10000	*	1.08972
chr2	115438290	115443289	5000	*	1.02676
chr2	115833290	115838289	5000	*	1.01225
chr2	116028290	116038289	10000	*	1.00552
chr2	116168290	116173289	5000	*	1.17805
chr2	116213290	116218289	5000	*	1.22533
chr2	116288290	116293289	5000	*	1.00487
chr2	116913289	116938288	25000	*	1.22263
chr2	117088289	117093288	5000	*	1.22103
chr2	117103289	117108288	5000	*	1.20222
chr2	117198289	117203288	5000	*	1.15285
chr2	117258289	117263288	5000	*	1.16768
chr2	117268289	117273288	5000	*	1.06665
chr2	117348289	117353288	5000	*	1.33383
chr2	118248288	118253287	5000	*	1.00972
chr2	118373288	118378287	5000	*	1.27066
chr2	118988288	118993287	5000	*	1.12543
chr2	119053288	119063287	10000	*	1.14498
chr2	119078288	119083287	5000	*	1.2755
chr2	119148288	119153286	4999	*	1.09436
chr2	119418287	119423286	5000	*	1.18108
chr2	119423287	119433286	10000	*	1.15093
chr2	119458287	119468286	10000	*	1.05736
chr2	119523287	119528286	5000	*	1.09355
chr2	119858287	119888286	30000	*	1.24495
chr2	121578286	121593285	15000	*	1.01322
chr2	122328285	122333284	5000	*	1.2009
chr2	122478285	122488284	10000	*	1.24801
chr2	122653285	122658284	5000	*	1.30492
chr2	123138284	123158283	20000	*	1.07483
chr2	123528284	123533283	5000	*	1.07848
chr2	123678284	123693283	15000	*	1.07849
chr2	123963284	123973283	10000	*	1.15062
chr2	124218283	124223282	5000	*	1.01975
chr2	124363283	124368282	5000	*	1.12395
chr2	124433283	124438282	5000	*	1.39079
chr2	124513283	124518282	5000	*	1.39537
chr2	125283283	125293282	10000	*	1.04643
chr2	125653282	125663281	10000	*	1.07695
chr2	126143282	126153281	10000	*	1.1936
chr2	126773281	126783280	10000	*	1.11892
chr2	128113280	128123279	10000	*	1.18729
chr2	128358280	128388279	30000	*	1.08476
chr2	129198280	129218279	20000	*	1.12303
chr2	129468279	129473278	5000	*	1.02937
chr2	129588279	129598278	10000	*	1.22464
chr2	129628279	129633278	5000	*	1.26151
chr2	129953279	129958278	5000	*	1.00623
chr2	130243279	130273278	30000	*	1.12124
chr2	131113278	131118277	5000	*	1.26321
chr2	132143277	132158276	15000	*	1.2368
chr2	132338277	132343276	5000	*	1.68209
chr2	132508277	132513276	5000	*	1.01906
chr2	132768277	132778276	10000	*	1.03607
chr2	134093276	134098275	5000	*	1.03853
chr2	136098274	136108273	10000	*	1.0665
chr2	136488274	136493273	5000	*	1.10486
chr2	136833273	136843272	10000	*	1.11323
chr2	137748273	137753272	5000	*	1.14133
chr2	137843273	137848272	5000	*	1.18733
chr2	137848273	137853272	5000	*	1.14089
chr2	138058273	138068271	9999	*	1.02209
chr2	138338272	138348271	10000	*	1.03315
chr2	138773272	138778271	5000	*	1.09008
chr2	138808272	138823271	15000	*	1.12298
chr2	138883272	138893271	10000	*	1.10893
chr2	139438271	139473270	35000	*	1.04337
chr2	141693270	141698269	5000	*	1.14878
chr2	141783270	141793269	10000	*	1.02081
chr2	142593269	142603268	10000	*	1.44463
chr2	142723269	142728268	5000	*	1.26504
chr2	143533268	143543267	10000	*	1.44305
chr2	144768267	144788266	20000	*	1.09191
chr2	144823267	144828266	5000	*	1.17786
chr2	145438267	145443266	5000	*	1.26566
chr2	145738266	145743265	5000	*	1.16426
chr2	145823266	145838265	15000	*	1.00356
chr2	146023266	146028265	5000	*	1.07611
chr2	146203266	146218265	15000	*	1.11567
chr2	147733265	147738264	5000	*	1.03318
chr2	147783265	147788264	5000	*	1.08182
chr2	148143265	148148263	4999	*	1.13816
chr2	148403264	148408263	5000	*	1.08791
chr2	148598264	148608263	10000	*	1.20974
chr2	149558263	149563262	5000	*	1.00726
chr2	149783263	149788262	5000	*	1.17445
chr2	150828262	150838261	10000	*	1.0025
chr2	150923262	150938261	15000	*	1.11689
chr2	151103262	151113261	10000	*	1.12742
chr2	151173262	151178261	5000	*	1.35579
chr2	151793262	151803261	10000	*	1.05203
chr2	152433261	152438260	5000	*	1.07588
chr2	152583261	152593260	10000	*	1.44649
chr2	153228260	153233259	5000	*	1.07893
chr2	153598260	153618259	20000	*	1.14455
chr2	153753260	153758259	5000	*	1.0055
chr2	153783260	153798259	15000	*	1.04214
chr2	154943259	154948258	5000	*	1.03226
chr2	154998259	155003258	5000	*	1.26469
chr2	155413259	155418258	5000	*	1.01524
chr2	156298258	156303257	5000	*	1.1569
chr2	156538258	156568257	30000	*	1.75432
chr2	156608258	156613257	5000	*	1.0248
chr2	156788258	156793257	5000	*	1.09952
chr2	157063257	157068256	5000	*	1.31642
chr2	157103257	157118256	15000	*	1.16042
chr2	157603257	157613256	10000	*	1.07599
chr2	157668257	157673256	5000	*	1.13533
chr2	158448256	158453255	5000	*	1.03896
chr2	158798256	158813255	15000	*	1.5076
chr2	159598255	159613254	15000	*	1.06997
chr2	159723255	159738254	15000	*	1.38119
chr2	160348255	160358254	10000	*	1.57481
chr2	160643255	160648254	5000	*	1.02569
chr2	160658255	160673254	15000	*	1.06589
chr2	161328254	161333253	5000	*	1.24455
chr2	161543254	161558253	15000	*	1.01539
chr2	161708254	161713253	5000	*	1.00877
chr2	162473253	162478252	5000	*	1.0231
chr2	163113253	163118252	5000	*	1.31894
chr2	163293252	163313251	20000	*	1.11044
chr2	163433252	163443251	10000	*	1.275
chr2	164163252	164178251	15000	*	1.21345
chr2	165163251	165168250	5000	*	1.67244
chr2	165213251	165228250	15000	*	1.04441
chr2	165443251	165453250	10000	*	1.49633
chr2	165588251	165603250	15000	*	1.09945
chr2	165603251	165608250	5000	*	1.12394
chr2	166028250	166038249	10000	*	1.19011
chr2	166178250	166183249	5000	*	1.42567
chr2	166248250	166263249	15000	*	1.05144
chr2	166553250	166558249	5000	*	1.15191
chr2	167718249	167728248	10000	*	1.09984
chr2	167843249	167868248	25000	*	1.1774
chr2	168183249	168188248	5000	*	1.13265
chr2	168208249	168218248	10000	*	1.12798
chr2	168293249	168303248	10000	*	1.08226
chr2	168833248	168843247	10000	*	1.19829
chr2	168898248	168903247	5000	*	1.37417
chr2	169918247	169933246	15000	*	1.38937
chr2	169933247	169938246	5000	*	1.06991
chr2	170448247	170453246	5000	*	1.02666
chr2	171103246	171108245	5000	*	1.03692
chr2	171533246	171538245	5000	*	1.19037
chr2	171703246	171708245	5000	*	1.13271
chr2	172363245	172368244	5000	*	1.01422
chr2	172923245	172928244	5000	*	1.18302
chr2	173008245	173013244	5000	*	1.00373
chr2	173353245	173368243	14999	*	1.1775
chr2	174398244	174408243	10000	*	1.47995
chr2	174738243	174748242	10000	*	1.03176
chr2	175908242	175918241	10000	*	1.36147
chr2	176058242	176068241	10000	*	1.52476
chr2	176143242	176173241	30000	*	1.37933
chr2	176233242	176238241	5000	*	1.19444
chr2	177018242	177023241	5000	*	1.05839
chr2	177453241	177458240	5000	*	1.12488
chr2	178163241	178178240	15000	*	1.15355
chr2	178178241	178188240	10000	*	1.06472
chr2	178203241	178208240	5000	*	1.11689
chr2	179393240	179403239	10000	*	1.27423
chr2	179493240	179498239	5000	*	1.34849
chr2	181948238	181953237	5000	*	1.14471
chr2	181993238	182003237	10000	*	1.03524
chr2	182073238	182078237	5000	*	1.01231
chr2	182488237	182493236	5000	*	1.14812
chr2	182813237	182818236	5000	*	1.08342
chr2	182818237	182823236	5000	*	1.0711
chr2	182883237	182893236	10000	*	1.10345
chr2	183143237	183148236	5000	*	1.26065
chr2	183173237	183178236	5000	*	1.27463
chr2	183258237	183263236	5000	*	1.24826
chr2	185608235	185613234	5000	*	1.05764
chr2	185853235	185858234	5000	*	1.03848
chr2	186868234	186888233	20000	*	1.01524
chr2	187498233	187503232	5000	*	1.09782
chr2	187823233	187833232	10000	*	1.41014
chr2	188893232	188913231	20000	*	1.11515
chr2	189383232	189393231	10000	*	1.24281
chr2	190458231	190473230	15000	*	1.1308
chr2	190603231	190613230	10000	*	1.13077
chr2	192318229	192323228	5000	*	1.58976
chr2	192538229	192553228	15000	*	1.12366
chr2	193228229	193233228	5000	*	1.14996
chr2	194258228	194288227	30000	*	1.00795
chr2	194353228	194368227	15000	*	1.11137
chr2	195863227	195868226	5000	*	1.00289
chr2	197228226	197233225	5000	*	1.11405
chr2	197603225	197608224	5000	*	1.01899
chr2	197753225	197758224	5000	*	1.32688
chr2	197958225	197968224	10000	*	1.30186
chr2	198033225	198038224	5000	*	1.4472
chr2	198048225	198078224	30000	*	1.12319
chr2	198573224	198583223	10000	*	1.07187
chr2	198798224	198803223	5000	*	1.00495
chr2	199198224	199203223	5000	*	1.05842
chr2	199478224	199498223	20000	*	1.18179
chr2	199973223	199978222	5000	*	1.35542
chr2	200143223	200163222	20000	*	1.57704
chr2	200783223	200788222	5000	*	1.0475
chr2	201803222	201808221	5000	*	1.09239
chr2	201873222	201878221	5000	*	1.06393
chr2	201928222	201933221	5000	*	1.14468
chr2	201938222	201948221	10000	*	1.0389
chr2	202193222	202198221	5000	*	1.19798
chr2	202223222	202228221	5000	*	1.05066
chr2	202648221	202653220	5000	*	1.04366
chr2	202708221	202713220	5000	*	1.17839
chr2	202823221	202828220	5000	*	1.0353
chr2	203223221	203228220	5000	*	1.20662
chr2	203533221	203548220	15000	*	1.01555
chr2	203583221	203593220	10000	*	1.05549
chr2	203748220	203758219	10000	*	1.0761
chr2	204338220	204348219	10000	*	1.08865
chr2	204743220	204748219	5000	*	1.13067
chr2	205018219	205033218	15000	*	1.22557
chr2	205813219	205838218	25000	*	1.66921
chr2	205913219	205928218	15000	*	1.06631
chr2	206728218	206738217	10000	*	1.07308
chr2	207148218	207153217	5000	*	1.00638
chr2	207213218	207218217	5000	*	1.16589
chr2	208563217	208568216	5000	*	1.21319
chr2	208908216	208918215	10000	*	1.08244
chr2	208973216	208978215	5000	*	1.36731
chr2	209053216	209068215	15000	*	1.2192
chr2	209123216	209128215	5000	*	1.19699
chr2	209388216	209393215	5000	*	1.02199
chr2	210023215	210028214	5000	*	1.06674
chr2	210033215	210043214	10000	*	1.0423
chr2	211368214	211373213	5000	*	1.36
chr2	211463214	211473213	10000	*	1.81565
chr2	211548214	211553213	5000	*	1.1206
chr2	211843214	211848213	5000	*	1.29894
chr2	211883214	211888213	5000	*	1.03082
chr2	212223214	212233213	10000	*	1.0064
chr2	213708212	213713211	5000	*	1.47206
chr2	214528212	214538211	10000	*	1.10199
chr2	214648212	214663211	15000	*	1.01667
chr2	215053211	215058210	5000	*	1.29992
chr2	215668211	215673210	5000	*	1.00329
chr2	216123211	216128210	5000	*	1.00708
chr2	217228210	217243209	15000	*	1.13362
chr2	217273210	217283209	10000	*	1.03036
chr2	217283210	217288209	5000	*	1.31033
chr2	217728209	217738208	10000	*	1.56461
chr2	218028209	218033208	5000	*	1.0921
chr2	218413209	218463208	50000	*	1.07703
chr2	218858208	218878207	20000	*	1.23544
chr2	219163208	219178207	15000	*	1.01238
chr2	219338208	219348207	10000	*	1.01066
chr2	219903208	219923207	20000	*	1.0312
chr2	220498207	220503206	5000	*	1.1851
chr2	220618207	220633206	15000	*	1.09094
chr2	220843207	220848206	5000	*	1.21696
chr2	221458206	221463205	5000	*	1.0561
chr2	221613206	221623205	10000	*	1.04695
chr2	222358206	222363205	5000	*	1.19786
chr2	222473206	222488205	15000	*	1.33127
chr2	224308204	224313203	5000	*	1.14681
chr2	224468204	224483203	15000	*	1.23343
chr2	224483204	224488203	5000	*	1.18328
chr2	224818204	224823203	5000	*	1.11085
chr2	225038204	225058202	19999	*	1.32068
chr2	225158203	225163202	5000	*	1.22266
chr2	225378203	225388202	10000	*	1.11793
chr2	226928202	226943201	15000	*	1.04182
chr2	226948202	226953201	5000	*	1.04563
chr2	227383202	227388201	5000	*	1.18662
chr2	227798201	227813200	15000	*	1.17003
chr2	227908201	227913200	5000	*	1.198
chr2	228528201	228533200	5000	*	1.04632
chr2	228713201	228718200	5000	*	1.3535
chr2	228943200	228948199	5000	*	1.04996
chr2	231053199	231058198	5000	*	1.01005
chr2	231308199	231313198	5000	*	1.19171
chr2	233263197	233268196	5000	*	1.21619
chr2	233288197	233293196	5000	*	1.22631
chr2	233358197	233378196	20000	*	1.31203
chr2	233713197	233723196	10000	*	1.02497
chr2	233903196	233908195	5000	*	1.02018
chr2	234158196	234163195	5000	*	1.12481
chr2	234183196	234188195	5000	*	1.04154
chr2	234548196	234563195	15000	*	1.08413
chr2	234908196	234913195	5000	*	1.07922
chr2	234988196	235003195	15000	*	1.14255
chr2	235358195	235363194	5000	*	1.12218
chr2	235663195	235688194	25000	*	1.0425
chr2	236923194	236928193	5000	*	1.01794
chr2	237078194	237083193	5000	*	1.22197
chr2	237638194	237653192	14999	*	1.04116
chr2	239598192	239613191	15000	*	1.00533
chr2	240508191	240528190	20000	*	1.26369
chr2	241828190	241838189	10000	*	1.2883
chr3	804660	814659	10000	*	1.02097
chr3	1469660	1474659	5000	*	1.00838
chr3	2419659	2424658	5000	*	1.07138
chr3	2479659	2484658	5000	*	1.28611
chr3	2524659	2534658	10000	*	1.06488
chr3	3604658	3609657	5000	*	1.47343
chr3	4629657	4634656	5000	*	1.23748
chr3	5909656	5929655	20000	*	1.00899
chr3	5999656	6004655	5000	*	1.02727
chr3	6799656	6809654	9999	*	1.0348
chr3	7284655	7294654	10000	*	1.47564
chr3	7464655	7474654	10000	*	1.18792
chr3	7884655	7904654	20000	*	1.00206
chr3	8904654	8909653	5000	*	1.35974
chr3	9259654	9269653	10000	*	1.41012
chr3	9894653	9904652	10000	*	1.06532
chr3	10384653	10424652	40000	*	1.15312
chr3	11569652	11589651	20000	*	1.12612
chr3	12954651	12959650	5000	*	1.00296
chr3	13054651	13064650	10000	*	1.0874
chr3	13614650	13619649	5000	*	1.15296
chr3	13919650	13924649	5000	*	1.1637
chr3	13989650	14014649	25000	*	1.10543
chr3	14164650	14169649	5000	*	1.08651
chr3	14709649	14714648	5000	*	1.07173
chr3	15224649	15234648	10000	*	1.68921
chr3	16104648	16119647	15000	*	1.37062
chr3	17814647	17819646	5000	*	1.47902
chr3	18964646	18969645	5000	*	1.19782
chr3	19354646	19374645	20000	*	1.06418
chr3	19484645	19499644	15000	*	1.05717
chr3	21189644	21199643	10000	*	1.23236
chr3	21744644	21759643	15000	*	1.2954
chr3	23654642	23659641	5000	*	1.05541
chr3	24094642	24099641	5000	*	1.00839
chr3	24459641	24464640	5000	*	1.09856
chr3	24464641	24469640	5000	*	1.26078
chr3	24819641	24829640	10000	*	1.11176
chr3	24919641	24929640	10000	*	1.198
chr3	24934641	24949640	15000	*	1.09925
chr3	25574641	25579640	5000	*	1.04737
chr3	25579641	25584640	5000	*	1.01076
chr3	26499640	26504639	5000	*	1.11837
chr3	26924640	26929639	5000	*	1.20389
chr3	26944640	26974638	29999	*	1.03829
chr3	26994639	27004638	10000	*	1.16281
chr3	27689639	27699638	10000	*	1.10462
chr3	27939639	27949638	10000	*	1.29268
chr3	28049639	28059638	10000	*	1.1107
chr3	29279638	29284637	5000	*	1.03962
chr3	30369637	30379636	10000	*	1.08844
chr3	30404637	30414636	10000	*	1.03191
chr3	30599637	30609636	10000	*	1.00097
chr3	30804636	30819635	15000	*	1.07947
chr3	31069636	31074635	5000	*	1.02774
chr3	32759635	32774634	15000	*	1.44023
chr3	33044635	33049634	5000	*	1.00242
chr3	35634633	35654632	20000	*	1.15225
chr3	35689633	35694632	5000	*	1.18498
chr3	37484631	37489630	5000	*	1.04059
chr3	37539631	37544630	5000	*	1.03886
chr3	38374630	38379629	5000	*	1.01804
chr3	38484630	38494629	10000	*	1.17663
chr3	39109630	39119629	10000	*	1.21743
chr3	39154630	39199629	45000	*	1.10564
chr3	39249630	39254629	5000	*	1.05116
chr3	39309630	39324629	15000	*	1.04054
chr3	39444630	39449629	5000	*	1.01498
chr3	40639629	40644628	5000	*	1.18566
chr3	41274628	41279627	5000	*	1.29812
chr3	41364628	41369627	5000	*	1.39237
chr3	41424628	41439627	15000	*	1.27367
chr3	41449628	41454627	5000	*	1.02237
chr3	41644628	41664627	20000	*	1.00662
chr3	41784628	41804627	20000	*	1.29445
chr3	41864628	41879627	15000	*	1.02506
chr3	42369627	42374626	5000	*	1.01221
chr3	42634627	42639626	5000	*	1.01943
chr3	42904627	42909626	5000	*	1.05204
chr3	43214627	43219626	5000	*	1.72126
chr3	43339627	43344626	5000	*	1.14898
chr3	43504626	43514625	10000	*	1.18927
chr3	43559626	43564625	5000	*	1.00924
chr3	43599626	43604625	5000	*	1.17155
chr3	43814626	43819625	5000	*	1.1152
chr3	43904626	43909625	5000	*	1.09023
chr3	44219626	44244625	25000	*	1.00378
chr3	44294626	44299625	5000	*	1.10717
chr3	44479626	44484625	5000	*	1.04937
chr3	44489626	44494625	5000	*	1.01307
chr3	44709625	44714624	5000	*	1.84715
chr3	44769625	44779624	10000	*	1.11217
chr3	44974625	44979624	5000	*	1.06516
chr3	45019625	45034624	15000	*	1.04805
chr3	45034625	45039624	5000	*	1.27671
chr3	45049625	45064624	15000	*	1.48806
chr3	45149625	45159624	10000	*	1.04158
chr3	45194625	45204624	10000	*	1.04998
chr3	45429625	45434624	5000	*	1.0131
chr3	45504625	45509624	5000	*	1.03591
chr3	45754625	45764624	10000	*	1.00105
chr3	45849625	45869624	20000	*	1.15158
chr3	46254624	46264623	10000	*	1.15567
chr3	46274624	46279623	5000	*	1.14135
chr3	46774624	46784623	10000	*	1.10004
chr3	47494623	47499622	5000	*	1.27834
chr3	48869622	48879621	10000	*	1.10636
chr3	48954622	48969621	15000	*	1.05676
chr3	49169622	49174621	5000	*	1.10219
chr3	49414622	49434621	20000	*	1.16469
chr3	49619622	49624621	5000	*	1.00554
chr3	49764621	49769620	5000	*	1.03519
chr3	50024621	50029620	5000	*	1.01367
chr3	50279621	50284620	5000	*	1.03224
chr3	50954620	50974619	20000	*	1.22881
chr3	51094620	51104619	10000	*	1.21757
chr3	51449620	51454619	5000	*	1.25002
chr3	52104620	52134619	30000	*	1.04838
chr3	52389619	52394618	5000	*	1.06542
chr3	52459619	52464618	5000	*	1.34328
chr3	52944619	52949618	5000	*	1.16228
chr3	53029619	53034618	5000	*	1.0989
chr3	53399619	53414618	15000	*	1.01698
chr3	54444618	54449617	5000	*	1.04368
chr3	54699618	54704617	5000	*	1.02778
chr3	55324617	55334616	10000	*	1.00965
chr3	56134616	56139615	5000	*	1.03814
chr3	56224616	56229615	5000	*	1.0579
chr3	57059616	57084615	25000	*	1.26256
chr3	57149616	57154615	5000	*	1.00531
chr3	58424615	58429614	5000	*	1.1087
chr3	58904614	58919613	15000	*	1.00741
chr3	60559613	60569612	10000	*	1.2252
chr3	60714613	60719612	5000	*	1.12158
chr3	60719613	60754612	35000	*	1.20801
chr3	60864613	60869612	5000	*	1.65126
chr3	60899613	60909612	10000	*	1.00738
chr3	61104612	61109611	5000	*	1.02996
chr3	61289612	61309611	20000	*	1.00225
chr3	61474612	61479611	5000	*	1.02225
chr3	61619612	61624611	5000	*	1.17136
chr3	61739612	61744611	5000	*	1.09084
chr3	61909612	61914611	5000	*	1.04085
chr3	62279611	62294610	15000	*	1.04772
chr3	62899611	62904610	5000	*	1.06536
chr3	63724610	63729609	5000	*	1.45298
chr3	63769610	63779609	10000	*	1.6254
chr3	64019610	64024609	5000	*	1.12442
chr3	64209610	64214609	5000	*	1.13834
chr3	64329610	64344609	15000	*	1.23657
chr3	64439610	64444609	5000	*	1.16915
chr3	64769610	64774609	5000	*	1.1278
chr3	64779610	64794608	14999	*	1.11159
chr3	65679609	65689608	10000	*	1.01179
chr3	65974609	65994608	20000	*	1.06647
chr3	66309608	66314607	5000	*	1.02732
chr3	66354608	66359607	5000	*	1.0183
chr3	66389608	66394607	5000	*	1.1414
chr3	66739608	66749607	10000	*	1.01392
chr3	66944608	66949607	5000	*	1.17981
chr3	67109608	67119607	10000	*	1.19948
chr3	67119608	67124607	5000	*	1.08989
chr3	67124608	67129607	5000	*	1.02638
chr3	67569607	67579606	10000	*	1.01613
chr3	67834607	67839606	5000	*	1.03652
chr3	67999607	68004606	5000	*	1.28896
chr3	68019607	68034606	15000	*	1.06624
chr3	68459607	68464606	5000	*	1.03169
chr3	68919606	68924605	5000	*	1.32055
chr3	69179606	69184605	5000	*	1.03209
chr3	69249606	69259605	10000	*	1.2478
chr3	69269606	69274605	5000	*	1.08546
chr3	69409606	69414605	5000	*	1.1569
chr3	69424606	69434605	10000	*	1.2036
chr3	69504606	69509605	5000	*	1.42151
chr3	69609606	69614605	5000	*	1.08694
chr3	69834606	69839604	4999	*	1.07694
chr3	69854605	69859604	5000	*	1.10604
chr3	70329605	70339604	10000	*	1.07691
chr3	70864605	70874604	10000	*	1.14483
chr3	71009605	71019604	10000	*	1.09349
chr3	71094605	71099603	4999	*	1.20003
chr3	71774604	71814603	40000	*	1.21085
chr3	72859603	72864602	5000	*	1.5016
chr3	73199603	73209602	10000	*	1.12496
chr3	74094602	74099601	5000	*	1.13877
chr3	74949601	74954600	5000	*	1.04407
chr3	75249601	75254600	5000	*	1.04994
chr3	75439601	75444600	5000	*	1.02641
chr3	75459601	75464600	5000	*	1.20285
chr3	75904601	75909600	5000	*	1.32585
chr3	76009601	76014600	5000	*	1.29699
chr3	76284600	76289599	5000	*	1.22481
chr3	76634600	76649599	15000	*	1.33306
chr3	76949600	76954599	5000	*	1.15135
chr3	77019600	77024599	5000	*	2.48176
chr3	77379600	77384599	5000	*	1.05056
chr3	77999599	78004598	5000	*	1.29897
chr3	79059598	79064597	5000	*	1.05488
chr3	79174598	79184597	10000	*	1.0612
chr3	81129597	81154596	25000	*	1.08667
chr3	81179597	81184595	4999	*	1.00946
chr3	81209596	81219595	10000	*	1.01448
chr3	82519595	82539594	20000	*	1.02884
chr3	83009595	83014594	5000	*	1.08446
chr3	84294594	84304593	10000	*	1.8142
chr3	84414594	84424593	10000	*	1.2896
chr3	84879594	84884593	5000	*	1.00892
chr3	84894594	84904593	10000	*	1.10146
chr3	85454593	85464592	10000	*	1.39375
chr3	86134593	86169592	35000	*	1.05314
chr3	87799591	87804590	5000	*	1.32438
chr3	88309591	88314590	5000	*	1.01358
chr3	88404591	88409590	5000	*	1.00965
chr3	88429591	88449590	20000	*	1.12139
chr3	89359590	89369589	10000	*	1.03771
chr3	89499590	89509589	10000	*	1.05941
chr3	89604590	89614589	10000	*	1.12978
chr3	89979590	89994589	15000	*	1.03881
chr3	90314589	90319588	5000	*	1.1125
chr3	90579589	90589588	10000	*	1.40858
chr3	91324588	91329587	5000	*	1.10869
chr3	93784587	93799585	14999	*	1.28881
chr3	93894586	93899585	5000	*	1.36446
chr3	94239586	94244585	5000	*	1.04521
chr3	94309586	94319585	10000	*	1.0717
chr3	94449586	94454585	5000	*	1.08021
chr3	95574585	95579584	5000	*	1.01516
chr3	95754585	95759584	5000	*	1.14046
chr3	96099585	96104584	5000	*	1.15994
chr3	97154584	97159583	5000	*	1.39603
chr3	97354584	97369583	15000	*	1.23519
chr3	97619583	97634582	15000	*	1.09726
chr3	98239583	98249582	10000	*	1.19058
chr3	98434583	98444582	10000	*	1.09589
chr3	99549582	99554581	5000	*	1.2533
chr3	99584582	99589581	5000	*	1.34632
chr3	100364581	100369580	5000	*	1.05903
chr3	100384581	100389580	5000	*	1.09835
chr3	100389581	100394580	5000	*	1.40594
chr3	100444581	100449580	5000	*	1.10452
chr3	100479581	100484580	5000	*	1.27499
chr3	101404580	101409579	5000	*	1.1136
chr3	102309580	102319579	10000	*	1.18115
chr3	102564580	102574579	10000	*	1.03625
chr3	102969579	102974578	5000	*	1.15428
chr3	103474579	103484578	10000	*	1.03982
chr3	103549579	103554578	5000	*	1.13799
chr3	103784579	103789578	5000	*	1.04611
chr3	103964578	103969577	5000	*	1.15631
chr3	104299578	104304577	5000	*	1.26679
chr3	104844578	104864577	20000	*	1.01542
chr3	105909577	105914576	5000	*	1.04451
chr3	107029576	107044575	15000	*	1.02386
chr3	107094576	107109575	15000	*	1.11137
chr3	107414576	107424575	10000	*	1.121
chr3	107459576	107464575	5000	*	1.01054
chr3	107599576	107604575	5000	*	1.04697
chr3	107729575	107734574	5000	*	1.11585
chr3	108084575	108094574	10000	*	1.08989
chr3	108439575	108454574	15000	*	1.00099
chr3	108629575	108634574	5000	*	1.17228
chr3	109044574	109049573	5000	*	1.40078
chr3	109259574	109264573	5000	*	1.09459
chr3	110124574	110129573	5000	*	1.14501
chr3	110559573	110569572	10000	*	1.12529
chr3	110899573	110909572	10000	*	1.159
chr3	111939572	111944571	5000	*	1.0637
chr3	112119572	112129571	10000	*	1.27287
chr3	113144571	113149570	5000	*	1.31736
chr3	113349571	113359570	10000	*	1.17382
chr3	113834571	113844570	10000	*	1.13604
chr3	113989570	114004569	15000	*	1.00345
chr3	114034570	114039569	5000	*	1.29445
chr3	114479570	114494569	15000	*	1.08885
chr3	115799569	115804568	5000	*	1.14894
chr3	116364569	116369568	5000	*	1.16243
chr3	116444569	116449568	5000	*	1.05512
chr3	117894567	117899566	5000	*	1.03605
chr3	119184566	119209565	25000	*	1.01412
chr3	119904566	119914565	10000	*	1.12893
chr3	120139566	120144565	5000	*	1.17023
chr3	120209566	120214565	5000	*	1.0035
chr3	120249566	120254565	5000	*	1.02942
chr3	120809565	120814564	5000	*	1.26745
chr3	120874565	120879564	5000	*	1.05739
chr3	120944565	120949564	5000	*	1.17441
chr3	121664564	121679563	15000	*	1.04085
chr3	122024564	122029563	5000	*	1.13351
chr3	122424564	122434563	10000	*	1.06575
chr3	122694564	122704563	10000	*	1.26808
chr3	122704564	122709563	5000	*	1.40552
chr3	123079563	123099562	20000	*	1.00388
chr3	123429563	123434562	5000	*	1.07259
chr3	124424562	124429561	5000	*	1.04896
chr3	124894562	124899561	5000	*	1.2301
chr3	126559561	126574559	14999	*	1.1902
chr3	126899560	126914559	15000	*	1.1958
chr3	127024560	127029559	5000	*	1.1714
chr3	127819560	127829558	9999	*	1.00389
chr3	127989559	127994558	5000	*	1.00265
chr3	128154559	128159558	5000	*	1.12418
chr3	128574559	128599558	25000	*	1.25067
chr3	128869559	128874558	5000	*	1.32039
chr3	128964559	128969558	5000	*	1.2427
chr3	129109558	129114557	5000	*	1.19444
chr3	130044558	130049557	5000	*	1.08807
chr3	130714557	130719556	5000	*	1.08711
chr3	131494557	131499556	5000	*	1.03488
chr3	131599557	131604556	5000	*	1.02917
chr3	132184556	132194555	10000	*	1.14898
chr3	132269556	132279555	10000	*	1.21448
chr3	132749556	132754555	5000	*	1.25633
chr3	132794556	132809555	15000	*	1.17552
chr3	132809556	132814555	5000	*	1.06223
chr3	133104555	133114554	10000	*	1.1621
chr3	133239555	133249554	10000	*	1.17741
chr3	133274555	133284554	10000	*	1.15706
chr3	133534555	133539554	5000	*	1.12875
chr3	133684555	133694554	10000	*	1.13866
chr3	133694555	133699554	5000	*	1.04143
chr3	133849555	133859554	10000	*	1.038
chr3	133869555	133874554	5000	*	1.13028
chr3	133879555	133899554	20000	*	1.10897
chr3	133964555	133979554	15000	*	1.05375
chr3	134039555	134044554	5000	*	1.09728
chr3	134214554	134219553	5000	*	1.04513
chr3	134354554	134369553	15000	*	1.03481
chr3	134379554	134384553	5000	*	1.04054
chr3	134514554	134519553	5000	*	1.02512
chr3	134519554	134524553	5000	*	1.10317
chr3	134534554	134539553	5000	*	1.11913
chr3	134539554	134544553	5000	*	1.02489
chr3	134899554	134909553	10000	*	1.11903
chr3	135244554	135249553	5000	*	1.05044
chr3	135534553	135539552	5000	*	1.02469
chr3	135539553	135544552	5000	*	1.00372
chr3	135914553	135924552	10000	*	1.02299
chr3	135954553	135959552	5000	*	1.10617
chr3	136014553	136019552	5000	*	1.25998
chr3	136179553	136199552	20000	*	1.18095
chr3	137819552	137829551	10000	*	1.13622
chr3	138189551	138194550	5000	*	1.44464
chr3	138884551	138894550	10000	*	1.29516
chr3	139224550	139229549	5000	*	1.19722
chr3	139329550	139344549	15000	*	1.08075
chr3	140079550	140084549	5000	*	1.17083
chr3	141059549	141064548	5000	*	1.353
chr3	142544548	142549547	5000	*	1.16066
chr3	142874548	142879547	5000	*	1.02849
chr3	142939548	142944547	5000	*	1.06649
chr3	144289546	144299545	10000	*	1.18078
chr3	144894546	144899545	5000	*	1.11242
chr3	145609545	145619544	10000	*	1.3579
chr3	146434545	146439544	5000	*	1.05399
chr3	147414544	147419543	5000	*	1.00203
chr3	147504544	147514543	10000	*	1.06217
chr3	147709544	147729543	20000	*	1.061
chr3	147854544	147859543	5000	*	1.03451
chr3	148144543	148149542	5000	*	1.01677
chr3	148339543	148349542	10000	*	1.05657
chr3	149304542	149309541	5000	*	1.04553
chr3	150029542	150064541	35000	*	1.19251
chr3	150319542	150329541	10000	*	1.05284
chr3	151539541	151559540	20000	*	1.02224
chr3	151694541	151699540	5000	*	1.02246
chr3	152599540	152604539	5000	*	1.05589
chr3	152784540	152789539	5000	*	1.08084
chr3	154184539	154189538	5000	*	1.07351
chr3	154194539	154209538	15000	*	1.43147
chr3	154214539	154224538	10000	*	1.02442
chr3	154299539	154304537	4999	*	1.15834
chr3	154434538	154439537	5000	*	1.15178
chr3	154694538	154699537	5000	*	1.35626
chr3	154959538	154964537	5000	*	1.0949
chr3	155319538	155324537	5000	*	1.11382
chr3	155409538	155414537	5000	*	1.09149
chr3	156014537	156029536	15000	*	1.01582
chr3	156229537	156239536	10000	*	1.0793
chr3	157199536	157204535	5000	*	1.08269
chr3	157509536	157514535	5000	*	1.16602
chr3	157774536	157789535	15000	*	1.00767
chr3	157799536	157809535	10000	*	1.20057
chr3	159334535	159344533	9999	*	1.17186
chr3	160134534	160144533	10000	*	1.09301
chr3	160309534	160319533	10000	*	1.10159
chr3	160514534	160519533	5000	*	1.13261
chr3	161564533	161579532	15000	*	1.39612
chr3	161584533	161589532	5000	*	1.45298
chr3	161589533	161594532	5000	*	1.41657
chr3	161609533	161619532	10000	*	1.42562
chr3	161769533	161774532	5000	*	1.00553
chr3	162304532	162309531	5000	*	1.06543
chr3	162399532	162404531	5000	*	1.12136
chr3	162569532	162574531	5000	*	1.23423
chr3	162674532	162684531	10000	*	1.08088
chr3	162819532	162824531	5000	*	1.15946
chr3	162949532	162964531	15000	*	1.30356
chr3	162964532	162969531	5000	*	1.20376
chr3	164009531	164014530	5000	*	1.17535
chr3	164044531	164059530	15000	*	1.12568
chr3	164319531	164324530	5000	*	1.05895
chr3	164429530	164434529	5000	*	1.14788
chr3	164709530	164714529	5000	*	1.05693
chr3	164744530	164774529	30000	*	1.01169
chr3	165194530	165199529	5000	*	1.1921
chr3	165554530	165559529	5000	*	1.01907
chr3	165719529	165724528	5000	*	1.17715
chr3	165824529	165859528	35000	*	1.09888
chr3	166044529	166074528	30000	*	1.39355
chr3	166174529	166184528	10000	*	1.22313
chr3	166184529	166194528	10000	*	1.14062
chr3	166289529	166294528	5000	*	1.22808
chr3	166349529	166354528	5000	*	1.06981
chr3	166554529	166559528	5000	*	1.33697
chr3	166574529	166584528	10000	*	1.29163
chr3	166689529	166694528	5000	*	1.25905
chr3	166694529	166699528	5000	*	1.19338
chr3	166749529	166759528	10000	*	1.30948
chr3	166874529	166879528	5000	*	1.11681
chr3	166884529	166889528	5000	*	1.12019
chr3	166959528	166964527	5000	*	1.13535
chr3	167029528	167039527	10000	*	1.03132
chr3	167239528	167249527	10000	*	1.04216
chr3	167519528	167529527	10000	*	1.1442
chr3	167744528	167754527	10000	*	1.43939
chr3	167889528	167894527	5000	*	1.18287
chr3	168109528	168119527	10000	*	1.25794
chr3	168204527	168209526	5000	*	1.0996
chr3	168309527	168319526	10000	*	1.25349
chr3	168724527	168744526	20000	*	1.34478
chr3	169949526	169979525	30000	*	1.06415
chr3	170079526	170084525	5000	*	1.01534
chr3	170399526	170409525	10000	*	1.12815
chr3	171019525	171029524	10000	*	1.17975
chr3	171364525	171374524	10000	*	1.04937
chr3	171464525	171474524	10000	*	1.03116
chr3	171739525	171749524	10000	*	1.10588
chr3	173219523	173229522	10000	*	1.35101
chr3	173474523	173489522	15000	*	1.08104
chr3	173534523	173539522	5000	*	1.06918
chr3	174569522	174579521	10000	*	1.01199
chr3	176254521	176264520	10000	*	1.07464
chr3	177554520	177564519	10000	*	1.3481
chr3	178394519	178399518	5000	*	1.71117
chr3	179169519	179199518	30000	*	1.0322
chr3	179244519	179249518	5000	*	1.17681
chr3	179909518	179914517	5000	*	1.03088
chr3	180059518	180079517	20000	*	1.08837
chr3	180154518	180174517	20000	*	1.05462
chr3	180204518	180209517	5000	*	1.04985
chr3	180214518	180229517	15000	*	1.13232
chr3	180564518	180569517	5000	*	1.01117
chr3	180584518	180594517	10000	*	1.15848
chr3	180839517	180844516	5000	*	1.18032
chr3	180959517	180974516	15000	*	1.10717
chr3	180974517	180979516	5000	*	1.17443
chr3	181124517	181129516	5000	*	1.31009
chr3	181789517	181804516	15000	*	1.13766
chr3	182674516	182679515	5000	*	1.16293
chr3	183284516	183299514	14999	*	1.15423
chr3	183309515	183319514	10000	*	1.01714
chr3	184129515	184144514	15000	*	1.94103
chr3	185429514	185439513	10000	*	1.50567
chr3	185869513	185874512	5000	*	1.19129
chr3	189714510	189729509	15000	*	1.21748
chr3	193269508	193274507	5000	*	1.08335
chr3	193994507	194024506	30000	*	1.0222
chr3	194139507	194154506	15000	*	1.16998
chr3	194324507	194334506	10000	*	1.10841
chr3	196009505	196014504	5000	*	1.07541
chr3	196014505	196019504	5000	*	1.0728
chr3	196069505	196074504	5000	*	1.1165
chr4	673944	688943	15000	*	1.08921
chr4	1063944	1068943	5000	*	1.11165
chr4	3548942	3578941	30000	*	1.08188
chr4	4653941	4678940	25000	*	1.08179
chr4	5578940	5583939	5000	*	1.03434
chr4	5793940	5803939	10000	*	1.03263
chr4	5833940	5843939	10000	*	1.02213
chr4	5988940	5993939	5000	*	1.26484
chr4	6063940	6068939	5000	*	1.12023
chr4	6353940	6383939	30000	*	1.05135
chr4	6633939	6648938	15000	*	1.07208
chr4	7023939	7043938	20000	*	1.25492
chr4	7368939	7388938	20000	*	1.18716
chr4	8913938	8918937	5000	*	1.2923
chr4	10363936	10368935	5000	*	1.03546
chr4	10383936	10388935	5000	*	1.04168
chr4	10503936	10513935	10000	*	1.06407
chr4	10588936	10593935	5000	*	1.0363
chr4	10743936	10768935	25000	*	1.20292
chr4	11023936	11038935	15000	*	1.07845
chr4	11688935	11698934	10000	*	1.06941
chr4	11993935	11998934	5000	*	1.02709
chr4	12298935	12333934	35000	*	1.07377
chr4	12863934	12868933	5000	*	1.14533
chr4	13798934	13813933	15000	*	1.02476
chr4	13898934	13903933	5000	*	1.02071
chr4	14223933	14228932	5000	*	1.06142
chr4	14228933	14243932	15000	*	1.01794
chr4	14278933	14283932	5000	*	1.12172
chr4	14343933	14353932	10000	*	1.1341
chr4	14718933	14723932	5000	*	1.2271
chr4	14888933	14893932	5000	*	1.0234
chr4	15333932	15338931	5000	*	1.04215
chr4	15428932	15433931	5000	*	1.09125
chr4	15483932	15488931	5000	*	1.56053
chr4	15523932	15528931	5000	*	1.09833
chr4	15588932	15598931	10000	*	1.04938
chr4	15798932	15803931	5000	*	1.22445
chr4	15898932	15913931	15000	*	1.10332
chr4	16098932	16108931	10000	*	1.11892
chr4	16138932	16143931	5000	*	1.29528
chr4	16218932	16223931	5000	*	1.91853
chr4	16223932	16228931	5000	*	1.2998
chr4	16408932	16418931	10000	*	1.04158
chr4	16608931	16623930	15000	*	1.18662
chr4	16833931	16838930	5000	*	1.02775
chr4	17443931	17448930	5000	*	1.47508
chr4	17473931	17478930	5000	*	1.23986
chr4	18598930	18608929	10000	*	1.09553
chr4	18878930	18883929	5000	*	1.02785
chr4	20083929	20088928	5000	*	1.14413
chr4	20248929	20258928	10000	*	1.20638
chr4	20303928	20308927	5000	*	1.27922
chr4	20633928	20638927	5000	*	1.01316
chr4	20983928	20988927	5000	*	1.09134
chr4	21123928	21128927	5000	*	1.18754
chr4	21208928	21243927	35000	*	1.16611
chr4	21273928	21293927	20000	*	1.08428
chr4	21528928	21533927	5000	*	1.46404
chr4	21558927	21568926	10000	*	1.01089
chr4	21628927	21638926	10000	*	1.0934
chr4	22003927	22008926	5000	*	1.02447
chr4	22198927	22203926	5000	*	1.01695
chr4	22478927	22483926	5000	*	1.03022
chr4	22728927	22733926	5000	*	1.55579
chr4	22738927	22743926	5000	*	1.14233
chr4	23478926	23483925	5000	*	1.05705
chr4	23673926	23683925	10000	*	1.12126
chr4	23808926	23823925	15000	*	1.07329
chr4	23878926	23883925	5000	*	1.27881
chr4	23993926	24003925	10000	*	1.32483
chr4	24348925	24353924	5000	*	1.30818
chr4	24918925	24923924	5000	*	1.00324
chr4	24928925	24948924	20000	*	1.29576
chr4	27053923	27058922	5000	*	1.30818
chr4	27228923	27243922	15000	*	1.10528
chr4	27323923	27328922	5000	*	1.01874
chr4	27978922	27983921	5000	*	1.21487
chr4	28083922	28088921	5000	*	1.08197
chr4	29373921	29383920	10000	*	1.28186
chr4	29428921	29438920	10000	*	1.99279
chr4	29543921	29563920	20000	*	1.1573
chr4	29723921	29728920	5000	*	1.04214
chr4	29958921	29963920	5000	*	1.07766
chr4	30258921	30273920	15000	*	1.02904
chr4	30318921	30323920	5000	*	1.05573
chr4	31128920	31133919	5000	*	1.08665
chr4	31718919	31723918	5000	*	1.08038
chr4	32548919	32558918	10000	*	1.10845
chr4	34323917	34328916	5000	*	1.01623
chr4	36838915	36843914	5000	*	1.11346
chr4	37238915	37243914	5000	*	1.33953
chr4	37328915	37338914	10000	*	1.04854
chr4	43433910	43438909	5000	*	1.10336
chr4	47933907	47938906	5000	*	1.05139
chr4	54238902	54243901	5000	*	1.25963
chr4	55738900	55743899	5000	*	1.11015
chr4	62198895	62208894	10000	*	1.04318
chr4	64198894	64203893	5000	*	1.05909
chr4	64793893	64803892	10000	*	1.02583
chr4	68033891	68038890	5000	*	1.02099
chr4	69153890	69163889	10000	*	1.23798
chr4	71023888	71028887	5000	*	1.13048
chr4	74483886	74498885	15000	*	1.00162
chr4	75463885	75468884	5000	*	1.15796
chr4	75633885	75643884	10000	*	1.02939
chr4	76048884	76053883	5000	*	1.06558
chr4	76213884	76223883	10000	*	1.06807
chr4	76363884	76378883	15000	*	1.05475
chr4	76823884	76828883	5000	*	1.21085
chr4	77148883	77153882	5000	*	1.00631
chr4	77268883	77288882	20000	*	1.07528
chr4	77333883	77338882	5000	*	1.17865
chr4	77473883	77483882	10000	*	1.12768
chr4	77538883	77548882	10000	*	1.01422
chr4	78103883	78108882	5000	*	1.05036
chr4	79463882	79478881	15000	*	1.03116
chr4	80203881	80218880	15000	*	1.03343
chr4	82083879	82088878	5000	*	1.02802
chr4	82598879	82603878	5000	*	1.06918
chr4	82788879	82793878	5000	*	1.13425
chr4	83718878	83728877	10000	*	1.15581
chr4	86733876	86738875	5000	*	1.24505
chr4	89263874	89268873	5000	*	1.03377
chr4	89718873	89723872	5000	*	1.06536
chr4	90053873	90068872	15000	*	1.05889
chr4	91413872	91433871	20000	*	1.04942
chr4	92228871	92238870	10000	*	1.00844
chr4	92283871	92308870	25000	*	1.05831
chr4	92718871	92748870	30000	*	1.00006
chr4	92898871	92903870	5000	*	1.18807
chr4	93823870	93833869	10000	*	1.02868
chr4	93878870	93883869	5000	*	1.01195
chr4	94123870	94138869	15000	*	1.035
chr4	94648870	94653869	5000	*	1.1198
chr4	94913869	94918868	5000	*	1.10947
chr4	95018869	95043868	25000	*	1.07345
chr4	95048869	95058868	10000	*	1.00226
chr4	95108869	95113868	5000	*	1.84682
chr4	95118869	95123868	5000	*	1.00279
chr4	95348869	95353868	5000	*	1.10555
chr4	95383869	95388868	5000	*	1.26965
chr4	95388869	95393868	5000	*	1.01266
chr4	95403869	95418868	15000	*	1.07374
chr4	95543869	95548868	5000	*	1.39375
chr4	95653869	95658868	5000	*	1.03446
chr4	95743869	95758868	15000	*	1.05314
chr4	95778869	95783868	5000	*	1.37761
chr4	95783869	95788868	5000	*	1.47364
chr4	95843869	95848868	5000	*	1.27741
chr4	96093868	96108867	15000	*	1.03456
chr4	96113868	96118867	5000	*	1.40339
chr4	96118868	96123867	5000	*	1.33452
chr4	96133868	96138867	5000	*	1.14698
chr4	96448868	96463867	15000	*	1.04929
chr4	96823868	96833867	10000	*	1.11403
chr4	97043868	97048867	5000	*	1.00471
chr4	97248867	97253866	5000	*	1.04388
chr4	97298867	97303866	5000	*	1.21732
chr4	97603867	97613866	10000	*	1.10244
chr4	97778867	97783866	5000	*	1.22612
chr4	98168867	98178866	10000	*	1.12089
chr4	98238867	98248866	10000	*	1.14492
chr4	98803866	98828865	25000	*	1.02511
chr4	99978865	99988864	10000	*	1.29069
chr4	100843865	100858864	15000	*	1.0674
chr4	100973865	100988863	14999	*	1.0561
chr4	101103864	101113863	10000	*	1.09987
chr4	101878864	101888863	10000	*	1.03128
chr4	102363863	102373862	10000	*	1.08004
chr4	102688863	102698862	10000	*	1.14836
chr4	103258863	103268862	10000	*	1.23767
chr4	103888862	103898861	10000	*	1.68226
chr4	105858861	105863860	5000	*	1.05653
chr4	106933860	106938859	5000	*	1.06733
chr4	107713859	107723858	10000	*	1.01943
chr4	108358859	108363858	5000	*	1.05368
chr4	108728858	108733857	5000	*	1.01481
chr4	109328858	109338857	10000	*	1.06469
chr4	109728858	109738857	10000	*	1.31186
chr4	110263857	110268856	5000	*	1.22785
chr4	118218851	118233850	15000	*	1.18141
chr4	118393851	118403850	10000	*	1.26505
chr4	118458851	118463850	5000	*	1.08122
chr4	120018849	120023848	5000	*	1.02198
chr4	125553845	125563844	10000	*	1.1514
chr4	128328843	128333842	5000	*	1.11896
chr4	128583843	128593842	10000	*	1.01058
chr4	129113842	129138841	25000	*	1.00424
chr4	129258842	129263841	5000	*	1.09892
chr4	129308842	129323841	15000	*	1.32462
chr4	129828842	129833841	5000	*	1.20029
chr4	130153841	130188840	35000	*	1.09027
chr4	130548841	130558840	10000	*	1.02281
chr4	130583841	130603840	20000	*	1.0902
chr4	130718841	130728840	10000	*	1.43977
chr4	130773841	130778840	5000	*	1.01358
chr4	131023841	131033840	10000	*	1.02209
chr4	131113841	131128840	15000	*	1.0964
chr4	131178841	131183840	5000	*	1.12106
chr4	131188841	131193840	5000	*	1.13428
chr4	131858840	131863839	5000	*	1.0161
chr4	131948840	131958839	10000	*	1.03109
chr4	132118840	132128839	10000	*	1.19212
chr4	132388840	132393839	5000	*	1.34313
chr4	132598839	132603838	5000	*	1.02728
chr4	132623839	132628838	5000	*	1.38362
chr4	133098839	133118838	20000	*	1.05566
chr4	133938838	133948837	10000	*	1.19723
chr4	133963838	133968837	5000	*	1.03048
chr4	134078838	134098837	20000	*	1.05886
chr4	134133838	134138837	5000	*	1.2622
chr4	134688838	134713837	25000	*	1.18494
chr4	134893838	134928837	35000	*	1.01384
chr4	135443837	135448836	5000	*	1.03271
chr4	135623837	135628836	5000	*	1.00225
chr4	135903837	135908836	5000	*	1.15836
chr4	136333836	136338835	5000	*	1.09389
chr4	136763836	136768835	5000	*	1.05582
chr4	137838835	137843834	5000	*	1.28974
chr4	138288835	138293834	5000	*	1.01093
chr4	139173834	139193833	20000	*	1.03405
chr4	139198834	139208833	10000	*	1.027
chr4	139653834	139658833	5000	*	1.06107
chr4	139908834	139913833	5000	*	1.22132
chr4	140368833	140378832	10000	*	1.10338
chr4	141608832	141613831	5000	*	1.06989
chr4	141788832	141793831	5000	*	1.11584
chr4	141898832	141903831	5000	*	1.03859
chr4	142018832	142023831	5000	*	1.16769
chr4	142073832	142083831	10000	*	1.01712
chr4	142188832	142198831	10000	*	1.07246
chr4	143073831	143093830	20000	*	1.14736
chr4	144173830	144178829	5000	*	1.27777
chr4	144498830	144503829	5000	*	1.09243
chr4	144988830	144993829	5000	*	1.14756
chr4	144998830	145008829	10000	*	1.20845
chr4	146333829	146343828	10000	*	1.19573
chr4	146898828	146903827	5000	*	1.00214
chr4	147243828	147273827	30000	*	1.22852
chr4	147573828	147578827	5000	*	1.20131
chr4	148278827	148288826	10000	*	1.14543
chr4	148333827	148338826	5000	*	1.16489
chr4	149093826	149098825	5000	*	1.05147
chr4	149203826	149208825	5000	*	1.06557
chr4	150293825	150298824	5000	*	1.1286
chr4	150403825	150408824	5000	*	1.08364
chr4	150533825	150538824	5000	*	1.19908
chr4	150613825	150623824	10000	*	1.13514
chr4	150623825	150628824	5000	*	1.33917
chr4	150698825	150708824	10000	*	1.37578
chr4	150718825	150723824	5000	*	1.14086
chr4	150853825	150858824	5000	*	1.18052
chr4	151093825	151098824	5000	*	1.47364
chr4	151103825	151108824	5000	*	1.60053
chr4	151148825	151153824	5000	*	1.26178
chr4	151363825	151373824	10000	*	1.00977
chr4	151478824	151493823	15000	*	1.22379
chr4	152018824	152023823	5000	*	1.24261
chr4	152103824	152123823	20000	*	1.48331
chr4	152383824	152388823	5000	*	1.04177
chr4	153078823	153088822	10000	*	1.10486
chr4	153213823	153218822	5000	*	1.30871
chr4	153498823	153508822	10000	*	1.18052
chr4	153508823	153528822	20000	*	1.19561
chr4	154518822	154523821	5000	*	1.19025
chr4	155138822	155148821	10000	*	1.14118
chr4	157443820	157478819	35000	*	1.01312
chr4	157623820	157673819	50000	*	1.23753
chr4	160293817	160298816	5000	*	1.04345
chr4	160913817	160928816	15000	*	1.09488
chr4	160993817	161003816	10000	*	1.08424
chr4	161068817	161073816	5000	*	1.09828
chr4	162078816	162103815	25000	*	1.15331
chr4	162993815	163003814	10000	*	1.17103
chr4	163068815	163073814	5000	*	1.04047
chr4	164008815	164028813	19999	*	1.27744
chr4	164058814	164063813	5000	*	1.03933
chr4	164288814	164293813	5000	*	1.02637
chr4	164733814	164743813	10000	*	1.02751
chr4	164888814	164893813	5000	*	1.04225
chr4	165238814	165248813	10000	*	1.02018
chr4	165668813	165673812	5000	*	1.13248
chr4	165903813	165913812	10000	*	1.27401
chr4	166103813	166128812	25000	*	1.222
chr4	166238813	166243812	5000	*	1.47217
chr4	166243813	166253812	10000	*	1.20895
chr4	166258813	166263812	5000	*	1.24704
chr4	166933812	166938811	5000	*	1.45628
chr4	167603812	167618811	15000	*	1.13988
chr4	167623812	167628811	5000	*	1.02795
chr4	167688812	167693811	5000	*	1.18455
chr4	168338811	168343810	5000	*	1.00751
chr4	168803811	168813810	10000	*	1.43195
chr4	169453810	169458809	5000	*	1.1234
chr4	170033810	170043809	10000	*	1.2041
chr4	171073809	171088808	15000	*	1.05417
chr4	171328809	171338808	10000	*	1.21007
chr4	171533809	171538808	5000	*	1.07398
chr4	173068807	173073806	5000	*	1.28311
chr4	173173807	173178806	5000	*	1.1331
chr4	173798807	173803806	5000	*	1.01285
chr4	174298806	174303805	5000	*	1.35114
chr4	175098806	175113805	15000	*	1.22524
chr4	175763805	175788804	25000	*	1.25309
chr4	178233803	178238802	5000	*	1.03269
chr4	178258803	178278802	20000	*	1.2253
chr4	178433803	178443802	10000	*	1.16393
chr4	179243802	179248801	5000	*	1.07072
chr4	179338802	179343801	5000	*	1.07549
chr4	179853802	179858801	5000	*	1.03321
chr4	180048802	180053801	5000	*	1.0239
chr4	180773801	180783800	10000	*	1.11862
chr4	180858801	180863800	5000	*	1.13246
chr4	184148799	184188797	39999	*	1.01436
chr4	184993798	184998797	5000	*	1.0325
chr4	185753797	185763796	10000	*	1.44177
chr4	186008797	186018796	10000	*	1.11921
chr4	186103797	186113796	10000	*	1.00901
chr4	186263797	186273796	10000	*	1.00152
chr4	186683797	186693796	10000	*	1.01847
chr4	187283796	187313795	30000	*	1.08797
chr4	187593796	187598795	5000	*	1.00921
chr4	187713796	187718795	5000	*	1.12431
chr4	188028795	188038794	10000	*	1.34501
chr4	188078795	188083794	5000	*	1.2186
chr4	189018795	189023794	5000	*	1.05825
chr5	199239	224238	25000	*	1.00088
chr5	239239	259238	20000	*	1.22167
chr5	994238	1014237	20000	*	1.09937
chr5	1034238	1044237	10000	*	1.07851
chr5	1629237	1664236	35000	*	1.29199
[truncated: 2,715 more rows]

## Sheet: H3K9me2_DLD1
chr1	775001	780000	5000	*	1.18206
chr1	1110001	1115000	5000	*	1.04554
chr1	1260001	1269999	9999	*	1.09411
chr1	1360000	1369999	10000	*	1.23931
chr1	5454997	5459996	5000	*	1.13769
chr1	6944996	6959995	15000	*	1.54629
chr1	6999996	7004995	5000	*	1.38466
chr1	7154996	7159995	5000	*	1.05126
chr1	7329996	7334995	5000	*	1.01869
chr1	7559996	7564994	4999	*	1.08757
chr1	8304995	8309994	5000	*	1.23732
chr1	8354995	8359994	5000	*	1.65419
chr1	12374992	12389991	15000	*	1.92223
chr1	13389991	13399990	10000	*	1.05355
chr1	14069990	14084989	15000	*	1.21253
chr1	18864987	18869986	5000	*	1.22065
chr1	19214986	19219985	5000	*	1.04245
chr1	20414985	20419984	5000	*	1.07045
chr1	20969985	20979984	10000	*	1.37901
chr1	21374985	21384984	10000	*	1.26896
chr1	21704984	21709983	5000	*	1.05293
chr1	27804979	27809978	5000	*	1.01484
chr1	28994978	29004977	10000	*	1.07873
chr1	31614976	31639975	25000	*	1.04936
chr1	32929975	32934974	5000	*	1.22813
chr1	34019975	34024974	5000	*	1.04455
chr1	34099974	34124973	25000	*	1.06911
chr1	34944974	34949973	5000	*	1.12478
chr1	35514973	35529972	15000	*	1.09142
chr1	35689973	35704972	15000	*	1.03753
chr1	36519973	36524972	5000	*	1.32431
chr1	37164972	37174971	10000	*	1.23302
chr1	38619971	38624970	5000	*	1.05541
chr1	39184970	39194969	10000	*	1.24205
chr1	39899970	39909969	10000	*	1.20398
chr1	40924969	40929968	5000	*	1.19933
chr1	40989969	41004968	15000	*	1.15634
chr1	41009969	41014968	5000	*	1.10993
chr1	41074969	41084968	10000	*	1.12772
chr1	41109969	41114968	5000	*	1.17202
chr1	41909968	41914967	5000	*	1.32122
chr1	41914968	41919967	5000	*	1.18415
chr1	42094968	42099967	5000	*	1.17769
chr1	43294967	43299966	5000	*	1.34481
chr1	43864967	43869966	5000	*	1.11863
chr1	43989967	44019966	30000	*	1.02534
chr1	44274966	44279965	5000	*	1.04667
chr1	47369964	47374963	5000	*	1.01754
chr1	47509964	47514963	5000	*	1.24741
chr1	47769964	47774963	5000	*	1.18059
chr1	47879964	47884963	5000	*	1.07633
chr1	47889964	47894963	5000	*	1.22962
chr1	48664963	48679962	15000	*	1.05439
chr1	49684962	49699961	15000	*	1.01752
chr1	49879962	49884961	5000	*	1.03139
chr1	50769961	50779960	10000	*	1.18109
chr1	50849961	50864960	15000	*	1.38321
chr1	51119961	51134960	15000	*	1.06824
chr1	52044960	52064959	20000	*	1.04216
chr1	56194957	56199956	5000	*	1.05882
chr1	59219955	59229954	10000	*	2.31218
chr1	59279954	59289953	10000	*	1.41438
chr1	59319954	59324953	5000	*	1.34175
chr1	59424954	59429953	5000	*	1.2891
chr1	59459954	59494953	35000	*	1.03542
chr1	59604954	59609953	5000	*	1.17921
chr1	59704954	59709953	5000	*	1.27483
chr1	59869954	59874953	5000	*	1.38309
chr1	60459954	60464953	5000	*	2.09321
chr1	60494954	60509953	15000	*	1.23732
chr1	61849952	61859951	10000	*	1.86885
chr1	63054951	63059950	5000	*	1.12049
chr1	63224951	63229950	5000	*	1.08418
chr1	63539951	63559950	20000	*	1.00681
chr1	64274951	64279950	5000	*	1.23166
chr1	65019950	65024949	5000	*	1.07785
chr1	65589949	65594948	5000	*	1.06104
chr1	66379949	66389948	10000	*	1.25756
chr1	66409949	66419948	10000	*	1.59114
chr1	67744948	67754947	10000	*	1.26761
chr1	69454946	69459945	5000	*	1.08241
chr1	70124946	70129945	5000	*	1.00298
chr1	72069944	72074943	5000	*	1.39379
chr1	74089943	74094942	5000	*	1.21945
chr1	74359943	74369942	10000	*	1.08428
chr1	74454942	74459941	5000	*	1.02433
chr1	75444942	75454941	10000	*	1.20328
chr1	76629941	76649940	20000	*	1.07202
chr1	77979940	77984939	5000	*	1.14887
chr1	78654939	78659938	5000	*	1.03294
chr1	80059938	80064937	5000	*	1.24378
chr1	80264938	80274937	10000	*	1.08613
chr1	80404938	80409937	5000	*	1.03144
chr1	80429938	80434937	5000	*	1.09778
chr1	80734937	80744936	10000	*	1.13974
chr1	80864937	80869936	5000	*	1.0139
chr1	80929937	80934936	5000	*	1.0839
chr1	81384937	81399936	15000	*	1.06265
chr1	82464936	82474935	10000	*	1.02333
chr1	82569936	82574935	5000	*	1.47124
chr1	82704936	82714935	10000	*	1.16837
chr1	89494931	89519929	24999	*	1.16101
chr1	89774930	89779929	5000	*	1.45844
chr1	93244928	93249927	5000	*	1.16766
chr1	95699926	95704925	5000	*	1.18544
chr1	96369925	96374924	5000	*	1.3213
chr1	98639923	98644922	5000	*	1.17229
chr1	99319923	99329922	10000	*	1.02133
chr1	100629922	100634921	5000	*	1.05298
chr1	102079921	102084920	5000	*	1.04437
chr1	102104921	102119919	14999	*	1.05538
chr1	102554920	102559919	5000	*	1.5594
chr1	103529919	103554918	25000	*	1.00457
chr1	103894919	103904918	10000	*	1.19272
chr1	103929919	103934918	5000	*	1.03033
chr1	105459918	105464917	5000	*	1.41126
chr1	106689917	106704916	15000	*	1.15372
chr1	109224915	109229914	5000	*	1.04393
chr1	109819914	109844913	25000	*	1.0292
chr1	110034914	110049913	15000	*	1.02396
chr1	110049914	110054913	5000	*	1.12286
chr1	110184914	110189913	5000	*	1.00825
chr1	110369914	110374913	5000	*	1.23389
chr1	110679914	110689913	10000	*	1.16157
chr1	111259913	111274912	15000	*	1.0481
chr1	112204912	112209911	5000	*	1.02191
chr1	113709911	113714910	5000	*	1.09139
chr1	114749910	114754909	5000	*	1.10201
chr1	115159910	115164909	5000	*	1.05494
chr1	115499910	115504909	5000	*	1.43542
chr1	116309909	116314908	5000	*	1.18218
chr1	116484909	116489908	5000	*	1.00734
chr1	116619909	116624908	5000	*	1.03198
chr1	116794909	116809908	15000	*	1.20022
chr1	116834909	116839908	5000	*	1.05586
chr1	117594908	117599907	5000	*	1.08282
chr1	117884908	117889907	5000	*	1.1761
chr1	119139907	119159906	20000	*	1.09477
chr1	119704907	119724906	20000	*	1.33527
chr1	119964906	119979905	15000	*	1.10843
chr1	123529904	123534903	5000	*	1.11342
chr1	143664888	143669887	5000	*	1.28402
chr1	145754886	145759885	5000	*	1.4802
chr1	147774884	147779883	5000	*	1.0212
chr1	148344884	148349883	5000	*	1.06835
chr1	149634883	149639882	5000	*	1.25706
chr1	149999883	150004882	5000	*	1.0336
chr1	150124882	150129881	5000	*	1.24204
chr1	150864882	150884881	20000	*	1.01252
chr1	152139881	152154880	15000	*	1.00773
chr1	156274878	156279877	5000	*	1.05989
chr1	157124877	157129876	5000	*	1.06766
chr1	157519877	157524876	5000	*	1.1061
chr1	157534877	157539876	5000	*	1.01323
chr1	163064872	163069871	5000	*	1.03911
chr1	164744871	164759870	15000	*	1.23269
chr1	165174870	165179869	5000	*	1.0796
chr1	165349870	165369869	20000	*	1.45241
chr1	165919870	165924869	5000	*	1.02975
chr1	165934870	165939869	5000	*	1.3346
chr1	168879868	168889867	10000	*	1.17757
chr1	169799867	169809866	10000	*	1.00574
chr1	171394866	171399865	5000	*	1.09566
chr1	171529865	171539864	10000	*	1.05454
chr1	173024864	173044863	20000	*	1.11381
chr1	173674864	173689863	15000	*	1.08872
chr1	173999863	174014862	15000	*	1.06306
chr1	174294863	174309862	15000	*	1.07619
chr1	174469863	174474862	5000	*	1.00457
chr1	174684863	174704862	20000	*	1.00366
chr1	175329862	175349861	20000	*	1.00437
chr1	176474862	176494860	19999	*	1.00205
chr1	176649861	176659860	10000	*	1.05565
chr1	176959861	176964860	5000	*	1.00448
chr1	177464861	177474860	10000	*	1.08478
chr1	178754860	178764859	10000	*	1.1236
chr1	178854860	178864859	10000	*	1.29733
chr1	178864860	178869859	5000	*	1.28792
chr1	179434859	179454858	20000	*	1.16418
chr1	179834859	179844858	10000	*	1.15612
chr1	179999859	180004858	5000	*	1.24932
chr1	180009859	180014858	5000	*	2.56305
chr1	180019859	180024858	5000	*	1.37879
chr1	180024859	180029858	5000	*	1.47431
chr1	180054859	180074858	20000	*	1.13284
chr1	180329858	180334857	5000	*	1.33948
chr1	180744858	180754857	10000	*	1.18538
chr1	181064858	181069857	5000	*	1.10075
chr1	181074858	181079857	5000	*	1.106
chr1	181389858	181399857	10000	*	1.00215
chr1	181484858	181489857	5000	*	1.11352
chr1	182834856	182854855	20000	*	1.07942
chr1	184709855	184714854	5000	*	1.03618
chr1	185014855	185019854	5000	*	1.33796
chr1	185029855	185034854	5000	*	1.43397
chr1	185044855	185054854	10000	*	1.09472
chr1	185629854	185634853	5000	*	1.27434
chr1	186144854	186154853	10000	*	1.44294
chr1	186284854	186299853	15000	*	1.00298
chr1	187114853	187119852	5000	*	1.05545
chr1	187394853	187399852	5000	*	1.11781
chr1	187639853	187649852	10000	*	1.24404
chr1	187669853	187674852	5000	*	1.18797
chr1	188009852	188014851	5000	*	1.03852
chr1	188079852	188084851	5000	*	1.05282
chr1	188894852	188899851	5000	*	1.68277
chr1	188899852	188914851	15000	*	1.10401
chr1	188984852	189004851	20000	*	1.00908
chr1	189489851	189499850	10000	*	1.06982
chr1	190744850	190749849	5000	*	1.10666
chr1	190944850	190959849	15000	*	1.13715
chr1	191149850	191174849	25000	*	1.18426
chr1	193519848	193554847	35000	*	1.27307
chr1	193889848	193894847	5000	*	1.27594
chr1	193969848	193984847	15000	*	1.04285
chr1	194814847	194824846	10000	*	1.63854
chr1	195214847	195219846	5000	*	1.38824
chr1	195819846	195824845	5000	*	1.38275
chr1	196349846	196359845	10000	*	1.08216
chr1	196694845	196699844	5000	*	1.16418
chr1	196869845	196874844	5000	*	1.0379
chr1	196954845	196959844	5000	*	1.04896
chr1	196989845	196994844	5000	*	1.20742
chr1	197259845	197269844	10000	*	1.62287
chr1	197479845	197504844	25000	*	1.31943
chr1	197954844	197959843	5000	*	1.56248
chr1	198039844	198044843	5000	*	1.79835
chr1	198044844	198069843	25000	*	1.05323
chr1	198264844	198274843	10000	*	1.01286
chr1	198384844	198389843	5000	*	1.63058
chr1	199009844	199014843	5000	*	1.01235
chr1	199414843	199419842	5000	*	1.14038
chr1	201204842	201214841	10000	*	1.03134
chr1	201559842	201569841	10000	*	1.07182
chr1	201844841	201849840	5000	*	1.36585
chr1	202094841	202109840	15000	*	1.41818
chr1	202139841	202144840	5000	*	1.02437
chr1	202384841	202394840	10000	*	1.05173
chr1	202449841	202459840	10000	*	1.16542
chr1	202639841	202644840	5000	*	1.09426
chr1	202719841	202724840	5000	*	1.06554
chr1	202849841	202854840	5000	*	1.06957
chr1	203094840	203099839	5000	*	1.02339
chr1	203194840	203209839	15000	*	1.02823
chr1	203489840	203494839	5000	*	1.09615
chr1	203599840	203614839	15000	*	1.0023
chr1	203794840	203799839	5000	*	1.08608
chr1	203799840	203804839	5000	*	1.35712
chr1	204119840	204129839	10000	*	1.24849
chr1	204139840	204159839	20000	*	1.06714
chr1	204299839	204309838	10000	*	1.04812
chr1	204489839	204499838	10000	*	1.0828
chr1	204784839	204799838	15000	*	1.05875
chr1	205139839	205149838	10000	*	1.04104
chr1	205289839	205299838	10000	*	1.67684
chr1	205689838	205694837	5000	*	1.01335
chr1	206124838	206129837	5000	*	1.56708
chr1	206244838	206249837	5000	*	1.05752
chr1	206649838	206664837	15000	*	1.20961
chr1	206664838	206669837	5000	*	1.12685
chr1	207029837	207044836	15000	*	1.201
chr1	208914836	208929835	15000	*	1.08226
chr1	209929835	209944834	15000	*	1.04494
chr1	209979835	209984834	5000	*	1.15623
chr1	210129835	210134834	5000	*	1.0794
chr1	211469834	211479833	10000	*	1.49431
chr1	211534834	211549833	15000	*	1.02313
chr1	211924833	211934832	10000	*	1.07339
chr1	212299833	212304832	5000	*	1.06753
chr1	212514833	212519832	5000	*	1.1597
chr1	212854833	212864832	10000	*	2.06532
chr1	213699832	213704831	5000	*	1.21266
chr1	213844832	213854831	10000	*	1.01415
chr1	215069831	215074830	5000	*	1.35766
chr1	215854830	215859829	5000	*	1.2713
chr1	216099830	216109829	10000	*	1.03337
chr1	216204830	216209829	5000	*	1.36785
chr1	217364829	217369828	5000	*	1.08284
chr1	218089829	218094827	4999	*	1.14106
chr1	218094828	218104827	10000	*	1.23067
chr1	218104828	218109827	5000	*	1.07983
chr1	218389828	218409827	20000	*	1.10518
chr1	219529827	219534826	5000	*	1.13051
chr1	221334826	221339825	5000	*	1.18458
chr1	222234825	222239824	5000	*	1.10548
chr1	222519825	222534824	15000	*	1.08626
chr1	223004825	223009824	5000	*	1.26478
chr1	223504824	223509823	5000	*	1.0229
chr1	224014824	224019823	5000	*	1.41403
chr1	224414823	224424822	10000	*	1.10172
chr1	224639823	224649822	10000	*	1.06632
chr1	225084823	225089822	5000	*	1.12779
chr1	225384823	225389822	5000	*	1.01675
chr1	226159822	226169821	10000	*	1.39764
chr1	226259822	226274821	15000	*	1.04968
chr1	226354822	226359821	5000	*	1.64264
chr1	226679822	226689821	10000	*	1.19697
chr1	227184821	227189820	5000	*	1.10322
chr1	227949821	227959820	10000	*	1.29736
chr1	228419820	228434819	15000	*	1.13026
chr1	228709820	228719819	10000	*	1.47849
chr1	229164820	229169819	5000	*	1.08919
chr1	229454819	229459818	5000	*	1.35576
chr1	229709819	229719818	10000	*	1.00005
chr1	230149819	230159818	10000	*	1.14875
chr1	230854818	230869817	15000	*	1.30321
chr1	232279817	232284816	5000	*	1.13146
chr1	233514816	233519815	5000	*	1.59076
chr1	234989815	234999814	10000	*	1.14012
chr1	235199815	235214814	15000	*	1.03135
chr1	235434815	235444814	10000	*	1.37435
chr1	235574815	235589814	15000	*	1.10524
chr1	236739814	236744813	5000	*	1.00272
chr1	237104813	237114812	10000	*	1.0694
chr1	238309812	238314811	5000	*	1.02441
chr1	238519812	238534811	15000	*	1.04016
chr1	238784812	238789811	5000	*	1.10179
chr1	239074812	239084811	10000	*	1.06689
chr1	239219812	239224811	5000	*	1.17646
chr1	239264812	239269811	5000	*	1.09329
chr1	239844811	239849810	5000	*	1.00376
chr1	240234811	240239810	5000	*	1.26443
chr1	240354811	240374810	20000	*	1.25089
chr1	240394811	240404810	10000	*	1.06045
chr1	241939810	241944809	5000	*	1.27076
chr1	242319809	242324808	5000	*	1.05599
chr1	243209809	243219808	10000	*	1.19068
chr1	243219809	243224808	5000	*	1.42597
chr1	244199808	244204807	5000	*	1.19588
chr1	245684807	245689806	5000	*	1.01006
chr1	246149806	246154805	5000	*	1.16188
chr1	246554806	246564805	10000	*	1.41711
chr1	246819806	246824805	5000	*	1.14504
chr1	247144805	247154804	10000	*	1.08226
chr1	247214805	247219804	5000	*	1.08505
chr1	247219805	247224804	5000	*	1.40064
chr1	247544805	247549804	5000	*	1.09432
chr1	247834805	247839804	5000	*	1.05213
chr1	247964805	247989804	25000	*	1.45946
chr2	18382	28381	10000	*	1.24611
chr2	1878381	1888380	10000	*	1.56184
chr2	2473380	2478379	5000	*	1.23523
chr2	3778379	3783378	5000	*	1.2382
chr2	4263379	4268378	5000	*	1.30276
chr2	4793378	4798377	5000	*	1.05487
chr2	4803378	4813377	10000	*	1.26876
chr2	4878378	4883377	5000	*	1.74449
chr2	5123378	5128377	5000	*	1.27693
chr2	5128378	5133377	5000	*	2.46086
chr2	6458377	6463376	5000	*	1.38428
chr2	6898377	6908376	10000	*	1.96752
chr2	6923377	6928376	5000	*	1.06777
chr2	6973376	6983375	10000	*	1.3823
chr2	8018376	8023375	5000	*	1.55617
chr2	9213375	9223374	10000	*	1.09887
chr2	10413374	10428373	15000	*	1.32254
chr2	10618374	10628373	10000	*	1.26792
chr2	10818373	10828372	10000	*	1.10786
chr2	12933372	12938371	5000	*	1.04359
chr2	13693371	13698370	5000	*	1.22949
chr2	14828370	14838369	10000	*	1.14323
chr2	14843370	14848369	5000	*	1.03418
chr2	14948370	14953369	5000	*	1.62297
chr2	16253369	16258368	5000	*	1.11086
chr2	17173368	17178367	5000	*	1.00892
chr2	17348368	17363367	15000	*	1.06651
chr2	18693367	18703366	10000	*	1.00741
chr2	19923366	19938365	15000	*	1.31859
chr2	21388365	21403364	15000	*	1.21439
chr2	22483364	22488363	5000	*	1.04447
chr2	24578363	24583362	5000	*	1.01587
chr2	24653362	24658361	5000	*	1.04299
chr2	27748360	27758359	10000	*	1.0783
chr2	28678359	28688358	10000	*	1.05005
chr2	29398359	29403358	5000	*	1.09669
chr2	31448357	31453356	5000	*	1.14934
chr2	32778356	32783355	5000	*	1.09759
chr2	33038356	33043355	5000	*	1.09685
chr2	33288356	33293355	5000	*	1.28721
chr2	33403356	33408355	5000	*	1.05257
chr2	34873354	34878353	5000	*	1.16936
chr2	35013354	35028353	15000	*	1.24325
chr2	36823353	36828352	5000	*	1.00552
chr2	37878352	37893351	15000	*	1.12869
chr2	38868351	38913350	45000	*	1.11342
chr2	39568351	39578350	10000	*	1.15507
chr2	40528350	40533349	5000	*	1.18146
chr2	40578350	40583349	5000	*	1.7796
chr2	42098349	42103348	5000	*	1.23128
chr2	42703348	42708347	5000	*	1.5158
chr2	42723348	42728347	5000	*	1.27467
chr2	42868348	42878347	10000	*	1.11179
chr2	43008348	43013347	5000	*	1.41126
chr2	43278348	43288347	10000	*	1.03785
chr2	43773347	43788346	15000	*	1.63488
chr2	44178347	44203346	25000	*	1.2871
chr2	44278347	44283346	5000	*	1.05571
chr2	45258346	45263345	5000	*	1.09715
chr2	46358345	46373344	15000	*	1.02159
chr2	46378345	46383344	5000	*	1.07001
chr2	46603345	46608344	5000	*	1.04191
chr2	47113345	47123344	10000	*	1.08696
chr2	47383344	47388343	5000	*	1.12437
chr2	47483344	47488343	5000	*	1.0668
chr2	48108344	48113343	5000	*	1.59134
chr2	48473344	48478343	5000	*	1.03216
chr2	48663343	48668342	5000	*	1.29807
chr2	49508343	49513342	5000	*	1.25643
chr2	49653343	49668342	15000	*	1.21066
chr2	49668343	49673342	5000	*	1.06875
chr2	49718343	49728342	10000	*	1.22059
chr2	50033342	50038341	5000	*	1.13284
chr2	50088342	50093341	5000	*	1.28792
chr2	50133342	50138341	5000	*	1.41155
chr2	50898342	50908341	10000	*	1.0498
chr2	51563341	51568340	5000	*	1.03219
chr2	53293340	53303339	10000	*	1.22992
chr2	53508340	53528339	20000	*	1.04514
chr2	56648337	56653336	5000	*	1.08819
chr2	57243337	57248336	5000	*	1.19972
chr2	58953335	58958334	5000	*	1.22901
chr2	59558335	59573334	15000	*	1.00406
chr2	59788335	59803334	15000	*	1.01153
chr2	60183334	60188333	5000	*	1.33002
chr2	61518333	61528332	10000	*	1.1227
chr2	62068333	62073332	5000	*	1.27977
chr2	62098333	62108332	10000	*	1.05579
chr2	62723332	62728331	5000	*	1.45483
chr2	65028330	65033329	5000	*	1.09125
chr2	65468330	65478329	10000	*	1.17043
chr2	66108330	66113329	5000	*	1.01664
chr2	67478328	67483327	5000	*	1.15485
chr2	68098328	68108327	10000	*	1.03949
chr2	68208328	68213327	5000	*	1.28675
chr2	73223324	73228323	5000	*	1.04966
chr2	74303323	74308322	5000	*	1.17617
chr2	75768322	75773321	5000	*	1.03311
chr2	76638321	76648320	10000	*	1.53596
chr2	78083320	78088319	5000	*	1.31904
chr2	79968319	79973318	5000	*	1.02202
chr2	80343318	80348317	5000	*	1.05744
chr2	80373318	80388317	15000	*	1.03067
chr2	80538318	80543317	5000	*	1.05532
chr2	81428317	81433316	5000	*	1.11084
chr2	81728317	81743316	15000	*	1.00703
chr2	83913315	83918314	5000	*	1.21613
chr2	83998315	84003314	5000	*	1.2089
chr2	84528315	84538314	10000	*	1.36795
chr2	84913315	84923314	10000	*	1.2043
chr2	85008315	85013314	5000	*	1.04747
chr2	85028315	85038314	10000	*	1.24907
chr2	85418314	85423313	5000	*	1.07873
chr2	86423313	86428312	5000	*	1.29561
chr2	86613313	86618312	5000	*	1.06921
chr2	86673313	86678312	5000	*	1.18667
chr2	91783309	91788308	5000	*	1.07188
chr2	94993307	94998306	5000	*	1.04825
chr2	95308306	95333305	25000	*	1.25756
chr2	95673306	95678305	5000	*	1.05614
chr2	95723306	95728305	5000	*	1.0591
chr2	96753305	96763304	10000	*	1.60784
chr2	98488304	98503303	15000	*	1.0613
chr2	98613304	98628303	15000	*	1.10044
chr2	100088303	100093302	5000	*	1.18462
chr2	100488302	100498301	10000	*	1.05608
chr2	100813302	100828301	15000	*	1.23016
chr2	101648301	101653300	5000	*	1.06238
chr2	103418300	103423299	5000	*	1.25826
chr2	103733300	103743299	10000	*	1.35494
chr2	103933300	103938299	5000	*	1.21876
chr2	103963300	103968299	5000	*	1.2049
chr2	104388299	104408298	20000	*	1.18635
chr2	104753299	104798298	45000	*	1.19074
chr2	105248299	105253298	5000	*	1.02917
chr2	105613298	105628297	15000	*	1.04157
chr2	105793298	105798297	5000	*	1.19965
chr2	106643297	106653296	10000	*	1.12147
chr2	106868297	106873296	5000	*	1.06173
chr2	107148297	107153296	5000	*	1.09575
chr2	107298297	107313296	15000	*	1.18676
chr2	107758297	107763296	5000	*	1.08574
chr2	107948296	107958295	10000	*	1.1275
chr2	108418296	108428295	10000	*	1.03082
chr2	110158295	110163294	5000	*	1.36447
chr2	112828293	112833292	5000	*	1.10782
chr2	112888292	112898291	10000	*	1.06216
chr2	113893292	113913291	20000	*	1.10149
chr2	115563290	115568289	5000	*	1.37285
chr2	115768290	115778289	10000	*	1.16845
chr2	116018290	116028289	10000	*	1.11086
chr2	116138290	116148289	10000	*	1.00808
chr2	117698289	117703288	5000	*	1.07259
chr2	117783289	117793288	10000	*	1.18131
chr2	117943288	117953287	10000	*	1.01586
chr2	118003288	118008287	5000	*	1.19998
chr2	118143288	118163287	20000	*	1.37776
chr2	118513288	118518287	5000	*	1.2113
chr2	118653288	118663287	10000	*	1.07184
chr2	118813288	118818287	5000	*	1.09584
chr2	119468287	119473286	5000	*	1.5406
chr2	119808287	119813286	5000	*	1.46756
chr2	121128286	121153285	25000	*	1.02624
chr2	122283285	122288284	5000	*	1.0951
chr2	122373285	122378284	5000	*	1.20743
chr2	122418285	122423284	5000	*	1.07458
chr2	122728285	122733284	5000	*	1.43442
chr2	123688284	123698283	10000	*	1.57414
chr2	124233283	124243282	10000	*	1.13956
chr2	124673283	124678282	5000	*	1.38429
chr2	124808283	124813282	5000	*	1.18378
chr2	125073283	125078282	5000	*	1.0093
chr2	125993282	125998281	5000	*	1.21745
chr2	126743281	126748280	5000	*	1.0646
chr2	127628281	127633280	5000	*	1.1841
chr2	128073280	128078279	5000	*	1.16182
chr2	128583280	128588279	5000	*	1.06362
chr2	128938280	128948279	10000	*	1.00707
chr2	129723279	129728278	5000	*	1.00379
chr2	130793278	130798277	5000	*	1.02636
chr2	131123278	131128277	5000	*	1.08653
chr2	131133278	131143277	10000	*	1.00837
chr2	131388278	131393277	5000	*	1.21694
chr2	132843277	132868276	25000	*	1.05265
chr2	133468276	133473275	5000	*	1.00442
chr2	134193276	134198275	5000	*	1.01059
chr2	135823274	135833273	10000	*	1.13543
chr2	137188273	137193272	5000	*	1.26132
chr2	137813273	137818272	5000	*	1.01334
chr2	138273272	138283271	10000	*	1.43226
chr2	140028271	140033270	5000	*	1.09706
chr2	140368271	140388270	20000	*	1.06479
chr2	140408271	140413270	5000	*	1.37107
chr2	140438271	140443270	5000	*	1.01002
chr2	140743270	140748269	5000	*	1.07974
chr2	141108270	141113269	5000	*	1.64507
chr2	142273269	142278268	5000	*	1.25186
chr2	142513269	142528268	15000	*	1.05268
chr2	143708268	143718267	10000	*	1.23586
chr2	143788268	143793267	5000	*	1.36375
chr2	143948268	143953267	5000	*	1.07667
chr2	144063268	144078267	15000	*	1.03227
chr2	144598267	144613266	15000	*	1.31936
chr2	145143267	145148266	5000	*	1.40148
chr2	145878266	145883265	5000	*	1.1971
chr2	147468265	147478264	10000	*	1.07755
chr2	149613263	149623262	10000	*	1.22847
chr2	149743263	149748262	5000	*	1.01863
chr2	150728262	150748261	20000	*	1.14542
chr2	151543262	151548261	5000	*	1.00233
chr2	152218261	152228260	10000	*	1.0801
chr2	152903261	152928260	25000	*	1.03875
chr2	152963261	152968260	5000	*	1.01112
chr2	154243260	154263259	20000	*	1.28635
chr2	154308260	154343259	35000	*	1.22676
chr2	154493259	154518258	25000	*	1.17408
chr2	154603259	154618258	15000	*	1.36474
chr2	155728258	155738257	10000	*	1.39379
chr2	156163258	156173257	10000	*	1.02642
chr2	156223258	156233257	10000	*	1
chr2	156253258	156263257	10000	*	1.08978
chr2	156798258	156803257	5000	*	1.14024
chr2	156803258	156823257	20000	*	1.32474
chr2	157558257	157563256	5000	*	1.05855
chr2	158028257	158038256	10000	*	1.31807
chr2	159758255	159763254	5000	*	1.15663
chr2	160108255	160113254	5000	*	1.03417
chr2	161078254	161083253	5000	*	1.18378
chr2	161553254	161568253	15000	*	1.40846
chr2	162583253	162588252	5000	*	1.10046
chr2	162628253	162658252	30000	*	1.09552
chr2	162953253	162958252	5000	*	1.07631
chr2	163363252	163378251	15000	*	1.66531
chr2	163778252	163788251	10000	*	1.108
chr2	164173252	164178251	5000	*	1.11472
chr2	164273252	164278251	5000	*	1.02967
chr2	164713251	164728250	15000	*	1.30037
chr2	164798251	164803250	5000	*	1.45662
chr2	164953251	164958250	5000	*	1.01605
chr2	165343251	165348250	5000	*	1.19804
chr2	165548251	165553250	5000	*	1.61162
chr2	165668251	165673250	5000	*	1.24866
chr2	166003250	166018249	15000	*	1.47689
chr2	166888250	166893249	5000	*	1.20953
chr2	166993250	167003249	10000	*	1.07619
chr2	167218249	167223248	5000	*	1.06774
chr2	167248249	167258248	10000	*	1.05748
chr2	167598249	167608248	10000	*	1.4791
chr2	169083248	169098247	15000	*	1.0694
chr2	169103248	169108247	5000	*	1.18112
chr2	169633247	169638246	5000	*	1.11042
chr2	169868247	169873246	5000	*	1.30309
chr2	169923247	169928246	5000	*	1.28007
chr2	170338247	170343246	5000	*	1.05195
chr2	170443247	170458246	15000	*	1.16674
chr2	170703247	170708246	5000	*	1.01372
chr2	171463246	171468245	5000	*	1.87647
chr2	171793246	171803245	10000	*	1.04774
chr2	171968246	171973245	5000	*	1.01204
chr2	172133245	172148244	15000	*	1.2343
chr2	172553245	172558244	5000	*	1.13644
chr2	172693245	172698244	5000	*	1.15662
chr2	172813245	172823244	10000	*	1.2212
chr2	173613244	173618243	5000	*	1.13324
chr2	173948244	173953243	5000	*	1.04
chr2	174848243	174858242	10000	*	1.01116
chr2	175783243	175788242	5000	*	1.04133
chr2	177338241	177343240	5000	*	1.68968
chr2	177593241	177603240	10000	*	1.0713
chr2	178298241	178308240	10000	*	1.04274
chr2	178403240	178408239	5000	*	1.30885
chr2	178518240	178523239	5000	*	1.01692
chr2	178568240	178573239	5000	*	1.02831
chr2	178593240	178598239	5000	*	1.66159
chr2	179558240	179563239	5000	*	1.18579
chr2	180418239	180423238	5000	*	1.11095
chr2	181278238	181288237	10000	*	1.58635
chr2	181623238	181633237	10000	*	1.01249
chr2	182113238	182118237	5000	*	1.1121
chr2	182208237	182213236	5000	*	1.62759
chr2	182293237	182308236	15000	*	1.12108
chr2	182518237	182523236	5000	*	1.91911
chr2	182703237	182718236	15000	*	1.13722
chr2	182803237	182818236	15000	*	1.20294
chr2	183233237	183243236	10000	*	1.014
chr2	183743236	183763235	20000	*	1.05786
chr2	184793235	184803234	10000	*	1.35021
chr2	185278235	185283234	5000	*	1.02126
chr2	186508234	186523233	15000	*	1.09267
chr2	186643234	186648233	5000	*	1.11094
chr2	187163234	187173233	10000	*	1.04536
chr2	187198234	187203233	5000	*	1.02545
chr2	188168233	188173232	5000	*	1.04274
chr2	188958232	188963231	5000	*	1.08776
chr2	189318232	189328231	10000	*	1.15716
chr2	190328231	190333230	5000	*	1.24007
chr2	190963231	190973230	10000	*	1.18346
chr2	191463230	191473229	10000	*	1.16766
chr2	193183229	193188228	5000	*	1.4103
chr2	193443229	193448228	5000	*	1.02189
chr2	193883228	193898227	15000	*	1.07637
chr2	194283228	194288227	5000	*	1.11356
chr2	194478228	194483227	5000	*	1.13208
chr2	195203227	195218226	15000	*	1.18087
chr2	195563227	195568226	5000	*	1.12853
chr2	196893226	196898225	5000	*	1.08933
chr2	197073226	197078225	5000	*	1.36699
chr2	197398225	197428224	30000	*	1.64137
chr2	197508225	197513224	5000	*	1.12266
chr2	198253225	198263224	10000	*	1.14005
chr2	199358224	199368223	10000	*	1.19981
chr2	200088223	200093222	5000	*	1.11707
chr2	200203223	200213222	10000	*	1.2795
chr2	201913222	201918221	5000	*	1.13562
chr2	202168222	202173221	5000	*	1.31422
chr2	202283222	202298221	15000	*	1.05996
chr2	202408221	202413220	5000	*	1.21754
chr2	202523221	202533220	10000	*	1.41729
chr2	202583221	202588220	5000	*	1.04176
chr2	202738221	202753220	15000	*	1.25261
chr2	203403221	203408220	5000	*	1.03032
chr2	204523220	204533219	10000	*	1.28402
chr2	204533220	204543219	10000	*	1.32007
chr2	204598220	204603219	5000	*	1.10695
chr2	206488218	206493217	5000	*	1.05082
chr2	206568218	206573217	5000	*	1.06773
chr2	206768218	206773217	5000	*	1.00529
chr2	208778216	208783215	5000	*	1.37381
chr2	210108215	210118214	10000	*	1.10735
chr2	210773215	210778214	5000	*	1.08494
chr2	212528213	212533212	5000	*	1.01006
chr2	212703213	212708212	5000	*	1.07137
chr2	212768213	212773212	5000	*	1.13745
chr2	212778213	212783212	5000	*	1.93087
chr2	212933213	212943212	10000	*	1.06782
chr2	212968213	212978212	10000	*	1.4269
chr2	213303213	213313212	10000	*	1.38475
chr2	213863212	213868211	5000	*	1.08369
chr2	214378212	214383211	5000	*	1.02611
chr2	215438211	215443210	5000	*	1.00286
chr2	215828211	215833210	5000	*	1.06229
chr2	216748210	216758209	10000	*	1.03492
chr2	216963210	216968209	5000	*	1.25886
chr2	216998210	217018209	20000	*	1.31816
chr2	217133210	217143209	10000	*	1.05825
chr2	217223210	217228209	5000	*	1.49841
chr2	218118209	218128208	10000	*	1.04016
chr2	219493208	219498207	5000	*	1.10143
chr2	220288207	220298206	10000	*	1.18877
chr2	221603206	221613205	10000	*	1.05825
chr2	222593205	222598204	5000	*	1.04446
chr2	222628205	222648204	20000	*	1.00729
chr2	223448205	223453204	5000	*	1.17035
chr2	224438204	224458203	20000	*	1.11087
chr2	224678204	224683203	5000	*	1.07838
chr2	225638203	225648202	10000	*	1.09593
chr2	229298200	229313199	15000	*	1.19088
chr2	229663200	229688199	25000	*	1.30139
chr2	229823200	229833199	10000	*	1.43753
chr2	230698199	230703198	5000	*	1.27341
chr2	231773198	231788197	15000	*	1.05486
chr2	232903197	232908196	5000	*	1.07987
chr2	234933196	234938195	5000	*	1.05605
chr2	235488195	235498194	10000	*	1.02827
chr2	235773195	235778194	5000	*	1.02176
chr2	235893195	235913194	20000	*	1.21497
chr2	238273193	238298192	25000	*	1.02101
chr2	239408192	239413191	5000	*	1.13964
chr2	240783191	240793190	10000	*	1.46884
chr2	241193191	241198190	5000	*	1.00523
chr2	241733190	241743189	10000	*	1.25439
chr3	954660	964659	10000	*	1.28909
chr3	1629660	1634659	5000	*	1.04474
chr3	1679660	1684659	5000	*	1.27209
chr3	4044658	4049657	5000	*	1.01743
chr3	5004657	5009656	5000	*	1.04635
chr3	6599656	6614655	15000	*	1.51999
chr3	7584655	7594654	10000	*	1.06555
chr3	7654655	7659654	5000	*	1.01225
chr3	8149654	8154653	5000	*	1.03005
chr3	8584654	8589653	5000	*	1.10317
chr3	9884653	9889652	5000	*	1.01882
chr3	10724652	10739651	15000	*	1.11193
chr3	11049652	11054651	5000	*	1.01848
chr3	11079652	11089651	10000	*	1.03619
chr3	11334652	11339651	5000	*	1.97274
chr3	12389651	12394650	5000	*	1.55048
chr3	13594650	13604649	10000	*	1.32833
chr3	15679648	15689647	10000	*	1.31098
chr3	15724648	15739647	15000	*	1.6954
chr3	16629648	16634647	5000	*	1.38054
chr3	16794648	16804647	10000	*	1.46739
chr3	17309647	17324646	15000	*	1.02361
chr3	17959647	17964646	5000	*	1.12191
chr3	19569645	19589644	20000	*	1.27876
chr3	21244644	21249643	5000	*	1.35819
chr3	21779644	21784643	5000	*	1.07959
chr3	21934643	21939642	5000	*	1.22247
chr3	25439641	25454640	15000	*	1.01153
chr3	25864640	25884639	20000	*	1.02205
chr3	27939639	27954638	15000	*	1.0498
chr3	28859638	28864637	5000	*	1.07769
chr3	29104638	29119637	15000	*	1.18875
chr3	32334635	32344634	10000	*	1.05147
chr3	32819635	32824634	5000	*	1.02588
chr3	32894635	32899634	5000	*	1.45098
chr3	33339634	33369633	30000	*	1.25067
chr3	34364634	34369633	5000	*	1.06402
chr3	34659633	34684632	25000	*	1.24378
chr3	34744633	34749632	5000	*	1.02632
chr3	34909633	34914632	5000	*	1.0248
chr3	35264633	35274632	10000	*	1.03678
chr3	35479633	35484632	5000	*	1.15354
chr3	35679633	35694632	15000	*	1.02535
chr3	35704633	35709632	5000	*	1.47255
chr3	35769633	35789632	20000	*	1.0016
chr3	35859632	35864631	5000	*	1.01744
chr3	37159631	37169630	10000	*	1.17717
chr3	37279631	37299630	20000	*	1.1337
chr3	37764631	37769630	5000	*	1.0798
chr3	38259631	38264630	5000	*	1.34394
chr3	38394630	38399629	5000	*	1.263
chr3	38549630	38554629	5000	*	1.017
chr3	39384630	39394629	10000	*	1.18289
chr3	42584627	42589626	5000	*	1.02788
chr3	44449626	44454625	5000	*	1.11803
chr3	44674625	44679624	5000	*	1.19276
chr3	45424625	45429624	5000	*	1.43004
chr3	45459625	45464624	5000	*	1.28665
chr3	45524625	45539624	15000	*	1.1049
chr3	46889624	46904623	15000	*	1.43624
chr3	48309623	48314622	5000	*	1.08329
chr3	48379623	48389622	10000	*	1.08743
chr3	48439622	48444621	5000	*	1.28665
chr3	48504622	48514621	10000	*	1.56974
chr3	49069622	49079621	10000	*	1.28426
chr3	49079622	49089621	10000	*	1.203
chr3	49124622	49129621	5000	*	1.02415
chr3	49184622	49189621	5000	*	1.60576
chr3	49264622	49279621	15000	*	1.01494
chr3	49519622	49539621	20000	*	1.08884
chr3	49799621	49814620	15000	*	1.13745
chr3	49844621	49849620	5000	*	1.06525
chr3	49884621	49889620	5000	*	1.20746
chr3	49959621	49964620	5000	*	1.30041
chr3	50019621	50029620	10000	*	1.14221
chr3	50149621	50159620	10000	*	1.005
chr3	50224621	50229620	5000	*	1.84567
chr3	52309619	52314618	5000	*	1.14829
chr3	52949619	52959618	10000	*	1.05749
chr3	53314619	53319618	5000	*	1.53775
chr3	53529618	53534617	5000	*	1.36605
chr3	54129618	54134617	5000	*	1.32104
chr3	54349618	54359617	10000	*	1.08799
chr3	54379618	54389617	10000	*	1.03005
chr3	55389617	55404616	15000	*	1.02279
chr3	55419617	55424616	5000	*	1.16521
chr3	55919617	55939616	20000	*	1.05601
chr3	56119616	56124615	5000	*	1.3414
chr3	56374616	56389615	15000	*	1.15365
chr3	56479616	56484615	5000	*	1.10518
chr3	57099616	57109615	10000	*	1.1139
chr3	57294615	57304614	10000	*	1.15266
chr3	58349615	58369614	20000	*	1.02068
chr3	58694614	58699613	5000	*	1.15875
chr3	58709614	58729613	20000	*	1.1739
chr3	59574614	59579613	5000	*	1.02131
chr3	60054613	60069612	15000	*	1.01072
chr3	60804613	60819612	15000	*	1.46086
chr3	62294611	62299610	5000	*	1.0046
chr3	62659611	62664610	5000	*	1.25734
chr3	63329611	63334610	5000	*	1.10791
chr3	63934610	63949609	15000	*	1.19374
chr3	65204609	65214608	10000	*	1.06818
chr3	66539608	66544607	5000	*	1.25011
chr3	66619608	66624607	5000	*	1.10352
chr3	69904605	69909604	5000	*	1.12872
chr3	70009605	70019604	10000	*	1.0139
chr3	70844605	70864604	20000	*	1.03893
chr3	70884605	70889604	5000	*	1.40075
chr3	71944604	71959603	15000	*	1.05272
chr3	73299603	73304602	5000	*	1.14471
chr3	73374603	73379602	5000	*	1.22383
chr3	73949602	73959601	10000	*	1.06562
chr3	75124601	75134600	10000	*	1.06393
chr3	76294600	76299599	5000	*	1.10493
chr3	76334600	76339599	5000	*	1.0277
chr3	76654600	76674599	20000	*	1.21211
chr3	76759600	76769599	10000	*	1.13099
chr3	76834600	76899599	65000	*	1.24629
chr3	76919600	76924599	5000	*	1.0937
chr3	77379600	77384599	5000	*	1.33926
chr3	78564599	78569598	5000	*	1.04361
chr3	78914598	78919597	5000	*	1.4287
chr3	79234598	79239597	5000	*	1.68047
chr3	79269598	79274597	5000	*	1.36705
chr3	79754598	79764597	10000	*	1.04736
chr3	80409597	80424596	15000	*	1.14138
chr3	81719596	81724595	5000	*	1.05561
chr3	82349596	82354595	5000	*	1.13466
chr3	82714595	82724594	10000	*	1.00959
chr3	83674595	83709593	34999	*	1.24964
chr3	84839594	84844593	5000	*	1.01428
chr3	85169593	85179592	10000	*	1.15706
chr3	85179593	85184592	5000	*	1.06987
chr3	85559593	85574592	15000	*	1.0986
chr3	86029593	86039592	10000	*	1.17897
chr3	86404592	86414591	10000	*	1.08067
chr3	86949592	86954591	5000	*	1.07037
chr3	87014592	87034591	20000	*	1.10451
chr3	87369592	87374591	5000	*	1.0316
chr3	88019591	88024590	5000	*	1.21939
chr3	88999590	89004589	5000	*	1.12683
chr3	89499590	89509589	10000	*	1.35914
chr3	89844590	89849589	5000	*	1.07512
chr3	90134589	90139588	5000	*	1.02276
chr3	94774586	94779585	5000	*	1.16937
chr3	94864586	94869585	5000	*	1.17406
chr3	96009585	96014584	5000	*	1.06824
chr3	96459584	96464583	5000	*	1.23427
chr3	97504584	97509583	5000	*	1.25365
chr3	97559584	97564583	5000	*	1.20447
chr3	98184583	98204582	20000	*	1.07462
chr3	99454582	99474581	20000	*	1.09286
chr3	99654582	99669581	15000	*	1.22142
chr3	99969582	99974581	5000	*	1.47701
chr3	100254581	100274580	20000	*	1.08716
chr3	100339581	100349580	10000	*	1.08026
chr3	100649581	100654580	5000	*	1.03589
chr3	101699580	101704579	5000	*	1.05589
chr3	103094579	103099578	5000	*	1.10466
chr3	103544579	103554578	10000	*	1.03666
chr3	104479578	104484577	5000	*	1.01414
chr3	105289577	105294576	5000	*	1.1045
chr3	105669577	105684576	15000	*	1.13541
chr3	106429576	106439575	10000	*	1.04803
chr3	106979576	106989575	10000	*	1.10318
chr3	107919575	107929574	10000	*	1.04326
chr3	108519575	108534574	15000	*	1.05125
chr3	108719575	108729574	10000	*	1.3216
chr3	108784575	108794574	10000	*	1.11256
chr3	109739574	109744573	5000	*	1.04477
chr3	110004574	110024573	20000	*	1.1672
chr3	110519573	110524572	5000	*	1.23941
chr3	110939573	110959572	20000	*	1.00813
chr3	112279572	112309571	30000	*	1.0794
chr3	112664572	112674571	10000	*	1.12038
chr3	113244571	113259570	15000	*	1.0425
chr3	113759571	113774570	15000	*	1.06903
chr3	114509570	114514569	5000	*	1.18293
chr3	114929570	114939569	10000	*	1.31293
chr3	115384569	115389568	5000	*	1.20209
chr3	115819569	115824568	5000	*	1.0306
chr3	116009569	116029568	20000	*	1.35903
chr3	116234569	116244568	10000	*	1.47673
chr3	117419568	117434567	15000	*	1.29805
chr3	118494567	118499566	5000	*	1.06762
chr3	119329566	119339565	10000	*	1.32027
chr3	121504565	121509564	5000	*	1.44149
chr3	123034563	123039562	5000	*	1.07631
chr3	123579563	123584562	5000	*	1.20408
chr3	124419562	124424561	5000	*	1.12932
chr3	125079562	125099561	20000	*	1.03139
chr3	125309561	125314560	5000	*	1.05076
chr3	125739561	125744560	5000	*	1.04494
chr3	128359559	128369558	10000	*	1.04536
chr3	129869558	129879557	10000	*	1.00545
chr3	129934558	129939557	5000	*	1.096
chr3	130939557	130984556	45000	*	1.00457
chr3	131299557	131309556	10000	*	1.5872
chr3	132139556	132144555	5000	*	1.0599
chr3	132334556	132349555	15000	*	1.20561
chr3	133329555	133354554	25000	*	1.03505
chr3	133894555	133899554	5000	*	1.10216
chr3	134264554	134279553	15000	*	1.03868
chr3	135734553	135744552	10000	*	1.19681
chr3	137519552	137524551	5000	*	1.03657
chr3	137639552	137654551	15000	*	1.07076
chr3	137864552	137869551	5000	*	1.30356
chr3	138554551	138559550	5000	*	1.2234
chr3	138634551	138639550	5000	*	1.06221
chr3	139674550	139689549	15000	*	1.0903
chr3	140039550	140044549	5000	*	1.3821
chr3	140589549	140594548	5000	*	1.1239
chr3	140874549	140879548	5000	*	1.36185
chr3	141119549	141124548	5000	*	1.2372
chr3	141714548	141724547	10000	*	1.21816
chr3	142259548	142269547	10000	*	1.02073
chr3	143619547	143624546	5000	*	1.14552
chr3	144489546	144494545	5000	*	1.08484
chr3	144554546	144559545	5000	*	1.15656
chr3	145834545	145849544	15000	*	1.04638
chr3	145969545	145984544	15000	*	1.00948
chr3	146004545	146009544	5000	*	1.14922
chr3	147724544	147729543	5000	*	1.36535
chr3	148139543	148144542	5000	*	1.044
chr3	149059543	149064542	5000	*	1.02827
chr3	149169543	149179542	10000	*	1.28923
chr3	149649542	149654541	5000	*	1.13679
chr3	150374542	150384541	10000	*	1.08505
chr3	150649541	150659540	10000	*	1.04895
chr3	155474538	155484537	10000	*	1.13426
chr3	155719537	155724536	5000	*	1.38043
chr3	156954536	156959535	5000	*	1.26682
chr3	157284536	157289535	5000	*	1.11678
chr3	157884536	157889535	5000	*	1.04038
chr3	158639535	158649534	10000	*	1.01318
chr3	159274535	159294534	20000	*	1.08686
chr3	160044534	160054533	10000	*	1.51009
chr3	160334534	160344533	10000	*	1.02101
chr3	160984533	160994532	10000	*	1.3895
chr3	161789533	161794532	5000	*	1.10582
chr3	162214532	162219531	5000	*	1.45656
chr3	162329532	162334531	5000	*	1.19854
chr3	162334532	162339531	5000	*	1.19857
chr3	162524532	162534531	10000	*	1.40719
chr3	162709532	162734531	25000	*	1.02208
chr3	162854532	162859531	5000	*	1.22381
chr3	162979532	162984531	5000	*	1.23732
chr3	163009532	163019531	10000	*	1.29449
chr3	163629531	163634530	5000	*	1.44683
chr3	163674531	163689530	15000	*	1.02897
chr3	164219531	164224530	5000	*	1.07214
chr3	164819530	164824529	5000	*	1.37895
chr3	166189529	166199528	10000	*	1.32994
chr3	167544528	167554527	10000	*	1.06745
chr3	167599528	167604527	5000	*	1.02897
chr3	168584527	168589526	5000	*	1.05143
chr3	168789527	168794526	5000	*	1.82944
chr3	168824527	168829526	5000	*	1.19021
chr3	168934527	168944526	10000	*	1.08091
chr3	171974524	171979523	5000	*	1.27976
chr3	172594524	172614523	20000	*	1.08127
chr3	173134524	173139523	5000	*	1.08377
chr3	173524523	173529522	5000	*	1.0024
chr3	173594523	173609522	15000	*	1.15347
chr3	174074523	174084522	10000	*	1.09279
chr3	174244523	174254522	10000	*	1.05325
chr3	174264523	174279522	15000	*	1.21533
chr3	174829522	174834521	5000	*	1.17226
chr3	174859522	174864521	5000	*	1.0269
chr3	175449522	175454521	5000	*	1.01055
chr3	175889521	175894520	5000	*	1.05854
chr3	176039521	176049520	10000	*	1.54598
chr3	177314520	177329519	15000	*	1.15811
chr3	177874520	177879519	5000	*	1.15994
chr3	177964520	177989519	25000	*	1.01659
chr3	178109520	178124519	15000	*	1.02744
chr3	179484519	179489518	5000	*	1.09982
chr3	179544518	179559517	15000	*	1.07642
chr3	179974518	179979517	5000	*	1.09947
chr3	182239516	182254515	15000	*	1.0303
chr3	183219516	183229515	10000	*	1.05153
chr3	183709515	183714514	5000	*	1.04994
chr3	184204515	184209514	5000	*	1.09794
chr3	186424513	186434512	10000	*	1.12828
chr3	186529513	186534512	5000	*	1.08341
chr3	188199512	188204511	5000	*	1.42155
chr3	188344511	188349510	5000	*	1.04177
chr3	189959510	189974509	15000	*	1.06083
chr3	190064510	190069509	5000	*	1.16086
chr3	190804510	190809509	5000	*	1.00293
chr3	191664509	191674508	10000	*	1.15893
chr3	192264508	192269507	5000	*	1.21285
chr3	193359508	193374507	15000	*	1.23459
chr3	193399507	193409506	10000	*	1.03007
chr3	193674507	193684506	10000	*	1.49039
chr3	194544507	194554506	10000	*	1.19539
chr3	195239506	195244505	5000	*	1.14353
chr3	197444504	197454503	10000	*	1.05456
chr3	197559504	197564503	5000	*	1.04768
chr4	1593943	1598942	5000	*	1.12579
chr4	5718940	5733939	15000	*	1.04423
chr4	6903939	6908938	5000	*	1.01706
chr4	7188939	7198938	10000	*	1.28355
chr4	10393936	10398935	5000	*	1.07814
chr4	10743936	10748935	5000	*	1.2234
chr4	12803934	12808933	5000	*	1.14651
chr4	13303934	13333933	30000	*	1.53674
chr4	13588934	13593933	5000	*	1.16553
chr4	14268933	14273932	5000	*	1.04247
chr4	16033932	16048931	15000	*	1.06673
chr4	16163932	16218931	55000	*	1.13197
chr4	16638931	16648930	10000	*	1.02412
chr4	17558931	17568930	10000	*	1.16252
chr4	18318930	18323929	5000	*	1.00808
chr4	18423930	18433929	10000	*	1.1938
chr4	18833930	18868929	35000	*	1.06762
chr4	18873930	18878929	5000	*	1.20301
chr4	18908930	18918929	10000	*	1.13149
chr4	19548929	19558928	10000	*	1.01144
chr4	19658929	19668928	10000	*	1.187
chr4	20068929	20078928	10000	*	1.02344
chr4	24813925	24823924	10000	*	1.06538
chr4	25018925	25023924	5000	*	1.29967
chr4	27563923	27573922	10000	*	1.13769
chr4	28683922	28688921	5000	*	1.11095
chr4	30923920	30933919	10000	*	1.20177
chr4	31048920	31053919	5000	*	1.52788
chr4	31293920	31298919	5000	*	1.02008
chr4	32333919	32338918	5000	*	1.27314
chr4	32728919	32738918	10000	*	1.08983
chr4	32793919	32798918	5000	*	1.85094
chr4	34613917	34618916	5000	*	1.61905
chr4	35473916	35478915	5000	*	1.10452
chr4	35558916	35573915	15000	*	1.05257
chr4	35708916	35733915	25000	*	1.01513
chr4	35903916	35913915	10000	*	1.09299
chr4	36328916	36333915	5000	*	1.38478
chr4	36393916	36398915	5000	*	1.2008
chr4	36653916	36663915	10000	*	1.00882
chr4	36733915	36753914	20000	*	1.04579
chr4	38723914	38738913	15000	*	1.25096
chr4	38823914	38833913	10000	*	1.25309
chr4	38858914	38868913	10000	*	1.29675
chr4	38968914	38973913	5000	*	1.21162
chr4	39148914	39153913	5000	*	1.35262
chr4	39283913	39293912	10000	*	1.24316
chr4	39358913	39378912	20000	*	1.11658
chr4	40108913	40118912	10000	*	1.71309
chr4	40143913	40153912	10000	*	1.05605
chr4	40448913	40453912	5000	*	1.13284
chr4	40913912	40918911	5000	*	1.10074
chr4	41188912	41198911	10000	*	1.16657
chr4	41613912	41618911	5000	*	1.06643
chr4	41878911	41883910	5000	*	1.66406
chr4	42533911	42538910	5000	*	1.11116
chr4	43593910	43603909	10000	*	1.03126
chr4	44358909	44368908	10000	*	1.04645
chr4	44453909	44458908	5000	*	1.03269
chr4	45058909	45063908	5000	*	1.32735
chr4	46968907	46973906	5000	*	1.31541
chr4	47378907	47388906	10000	*	1.08042
chr4	47503907	47518906	15000	*	1.58071
chr4	47798907	47808906	10000	*	1.01797
chr4	47988907	48003906	15000	*	1.00865
chr4	48403906	48408905	5000	*	1.06689
chr4	48568906	48578905	10000	*	1.02517
chr4	48703906	48708905	5000	*	1.37011
chr4	52448903	52458902	10000	*	1.16498
chr4	53248902	53253901	5000	*	1.16676
chr4	53983902	53993901	10000	*	1.37786
chr4	54478901	54488900	10000	*	1.11887
chr4	54558901	54563900	5000	*	1.53072
chr4	54763901	54773900	10000	*	1.06524
chr4	54773901	54778900	5000	*	1.15818
chr4	54778901	54803900	25000	*	1.00215
chr4	56163900	56183899	20000	*	1.08168
chr4	56223900	56253899	30000	*	1.00696
chr4	56423900	56448899	25000	*	1.10695
chr4	56528900	56538899	10000	*	1.08696
chr4	56538900	56548899	10000	*	1.17059
chr4	57023899	57048898	25000	*	1.01225
chr4	57633899	57643898	10000	*	1.22053
chr4	57713899	57738898	25000	*	1.23704
chr4	57988899	57993898	5000	*	1.12633
chr4	58393898	58398897	5000	*	1.10279
chr4	58578898	58583897	5000	*	1.15843
chr4	58668898	58678897	10000	*	1.06426
chr4	61048896	61053895	5000	*	1.29229
chr4	61303896	61328895	25000	*	1.06808
chr4	62258895	62263894	5000	*	1.23446
chr4	62343895	62348894	5000	*	1.23616
chr4	64358894	64368893	10000	*	1.20937
chr4	65333893	65348892	15000	*	1.04064
chr4	65378893	65393892	15000	*	1.2008
chr4	65813892	65818891	5000	*	1.25689
chr4	66548892	66563891	15000	*	1.31977
chr4	66833892	66838891	5000	*	1.20346
chr4	67333891	67338890	5000	*	1.08975
chr4	68323890	68328889	5000	*	1.53002
chr4	68938890	68943889	5000	*	1.02743
chr4	69058890	69073889	15000	*	1.0376
chr4	69843889	69853888	10000	*	1.19711
chr4	69858889	69863888	5000	*	1.32595
chr4	70438889	70443888	5000	*	1.0937
chr4	71263888	71273887	10000	*	1.25297
chr4	71698888	71703887	5000	*	1.17247
chr4	72148887	72158886	10000	*	1.16175
chr4	72238887	72248886	10000	*	1.00457
chr4	72408887	72418886	10000	*	1.05791
chr4	72493887	72498886	5000	*	1.10172
chr4	74033886	74048885	15000	*	1.21054
chr4	74423886	74428885	5000	*	1.39918
chr4	74823885	74838884	15000	*	1.09791
chr4	76048884	76053883	5000	*	1.32732
chr4	76093884	76098883	5000	*	1.00317
chr4	76638884	76643883	5000	*	1.20256
chr4	76758884	76768883	10000	*	1.04737
chr4	78288882	78293881	5000	*	1.20321
chr4	78743882	78748881	5000	*	1.29087
chr4	78788882	78793881	5000	*	1.06633
chr4	79333882	79338881	5000	*	1.05647
chr4	79343882	79348881	5000	*	1.07494
chr4	80253881	80263880	10000	*	1.02943
chr4	80338881	80348880	10000	*	1.2868
chr4	80483881	80498880	15000	*	1.08805
chr4	80603881	80613880	10000	*	1.00813
chr4	80878880	80888879	10000	*	1.23481
chr4	81403880	81413879	10000	*	1.07685
chr4	81413880	81423879	10000	*	1.03067
chr4	82193879	82208878	15000	*	1.24076
chr4	82408879	82423878	15000	*	1.01967
chr4	82533879	82548878	15000	*	1.54554
chr4	83898878	83903877	5000	*	1.01733
chr4	84198878	84203877	5000	*	1.26451
chr4	85093877	85098876	5000	*	1.06692
chr4	85158877	85163876	5000	*	1.29733
chr4	85533877	85543876	10000	*	1.09019
chr4	86063876	86068875	5000	*	1.0393
chr4	86283876	86288875	5000	*	1.03882
chr4	87028876	87038875	10000	*	1.04994
chr4	89458874	89473873	15000	*	1.17638
chr4	89698873	89703872	5000	*	1.02415
chr4	90748873	90763872	15000	*	1.17939
chr4	90893872	90903871	10000	*	1.30239
chr4	92313871	92318870	5000	*	1.10227
chr4	93703870	93723869	20000	*	1.04874
chr4	94143870	94148869	5000	*	1.02007
chr4	94173870	94178869	5000	*	1.15994
chr4	95513869	95518868	5000	*	1.49931
chr4	95843869	95848868	5000	*	1.16273
chr4	95878869	95888868	10000	*	1.09916
chr4	96003868	96018867	15000	*	1.05655
chr4	96468868	96473867	5000	*	1.01662
chr4	96593868	96598867	5000	*	1.00674
chr4	97818867	97828866	10000	*	1.24271
chr4	98823866	98833865	10000	*	1.32332
chr4	99433866	99438865	5000	*	1.10934
chr4	99898865	99903864	5000	*	1.02665
chr4	100273865	100278864	5000	*	1.49709
chr4	101113864	101118863	5000	*	1.08006
chr4	101623864	101628863	5000	*	1.29374
chr4	101743864	101748863	5000	*	1.05074
chr4	102908863	102913862	5000	*	1.08762
chr4	103683862	103688861	5000	*	1.38309
chr4	103788862	103798861	10000	*	1.30993
chr4	103943862	103963861	20000	*	1.00415
chr4	103973862	103978861	5000	*	1.11437
chr4	103988862	103998861	10000	*	1.64171
chr4	103998862	104003861	5000	*	1.37009
chr4	104113862	104118861	5000	*	1.09079
chr4	104143862	104153861	10000	*	1.4563
chr4	104293862	104298861	5000	*	1.62287
chr4	104663862	104673861	10000	*	1.81412
chr4	104758862	104763860	4999	*	1.02897
chr4	105743861	105748860	5000	*	1.06336
chr4	107268860	107273859	5000	*	1.26255
chr4	107508859	107513858	5000	*	1.00073
chr4	109068858	109083857	15000	*	1.18563
chr4	109933857	109948856	15000	*	1.08821
chr4	110673857	110678856	5000	*	1.11063
chr4	111168856	111173855	5000	*	1.32828
chr4	111508856	111513855	5000	*	1.04729
chr4	111623856	111648855	25000	*	1.19514
chr4	112998855	113013854	15000	*	1.39537
chr4	113773854	113778853	5000	*	1.11883
chr4	115063853	115068852	5000	*	1.04228
chr4	116283852	116303851	20000	*	1.12923
chr4	117693851	117698850	5000	*	1.14175
chr4	117703851	117718850	15000	*	1.16084
chr4	118493851	118498850	5000	*	1.0027
chr4	118978850	118983849	5000	*	1.20476
chr4	119308850	119313849	5000	*	1.42204
chr4	120598849	120603848	5000	*	1.02997
chr4	120773849	120788848	15000	*	1.12725
chr4	120858849	120863848	5000	*	1.02133
chr4	120863849	120873848	10000	*	1.05208
chr4	121718848	121728847	10000	*	1.05928
chr4	121988848	121993847	5000	*	1.12458
chr4	122068848	122073847	5000	*	1.11116
chr4	124273846	124278845	5000	*	1.1091
chr4	125628845	125633844	5000	*	1.20067
chr4	126633844	126648843	15000	*	1.24895
chr4	127903843	127908842	5000	*	1.05898
chr4	128488843	128508842	20000	*	1.02815
chr4	128983842	128998841	15000	*	1.03448
chr4	129118842	129123841	5000	*	1.53004
chr4	129628842	129633841	5000	*	1.11869
chr4	129738842	129763841	25000	*	1.00574
chr4	131108841	131113840	5000	*	1.32638
chr4	132933839	132938838	5000	*	1.01865
chr4	134728838	134733837	5000	*	1.4216
chr4	135008838	135018836	9999	*	1.29907
chr4	136188837	136198836	10000	*	1.08154
chr4	136268837	136278835	9999	*	1.21832
chr4	136933836	136943835	10000	*	1.53788
chr4	137303836	137318835	15000	*	1.13861
chr4	138778835	138783834	5000	*	1.22235
chr4	139143834	139153833	10000	*	1.12336
chr4	139438834	139448833	10000	*	1.17853
chr4	140928833	140933832	5000	*	1.15794
chr4	141083833	141108832	25000	*	1.08469
chr4	143158831	143163830	5000	*	1.02578
chr4	143783831	143788830	5000	*	1.04983
chr4	144118830	144123829	5000	*	1.10152
chr4	144853830	144863829	10000	*	1.53369
chr4	145633829	145638828	5000	*	1.10302
chr4	147353828	147358827	5000	*	1.35477
chr4	147423828	147433827	10000	*	1.024
chr4	147693827	147698826	5000	*	1.06142
chr4	148918826	148943825	25000	*	1.23854
chr4	150818825	150828824	10000	*	1.16136
chr4	155353821	155358820	5000	*	1.36659
chr4	155558821	155568820	10000	*	1.16902
chr4	156173821	156183820	10000	*	1.08905
chr4	156968820	156973819	5000	*	1.17056
chr4	157918819	157923818	5000	*	1.41437
chr4	158223819	158228818	5000	*	1.03833
chr4	158663819	158668818	5000	*	1.32593
chr4	158868819	158873818	5000	*	1.00215
chr4	160928817	160933816	5000	*	1.01666
chr4	161248817	161253816	5000	*	1.10493
chr4	161863816	161873815	10000	*	1.03674
chr4	162703816	162708815	5000	*	1.62287
chr4	163153815	163158814	5000	*	1.14664
chr4	163858815	163863814	5000	*	1.40227
chr4	164253814	164258813	5000	*	1.07749
chr4	165348813	165358812	10000	*	1.2076
chr4	165783813	165788812	5000	*	1.00001
chr4	168953811	168963810	10000	*	1.76496
chr4	169698810	169708809	10000	*	1.02065
chr4	172513808	172533807	20000	*	1.13679
chr4	172658808	172663807	5000	*	1.08781
chr4	173403807	173413806	10000	*	1.13377
chr4	173908807	173913806	5000	*	1.35357
chr4	175543805	175558804	15000	*	1.10094
chr4	175608805	175613804	5000	*	1.06583
chr4	175673805	175693804	20000	*	1.29459
chr4	176163805	176168804	5000	*	1.74791
chr4	177578804	177583803	5000	*	1.42773
chr4	177613804	177623803	10000	*	1.38202
chr4	178568803	178573802	5000	*	1.36454
chr4	178573803	178583802	10000	*	1.29231
chr4	180418801	180423800	5000	*	1.25643
chr4	181138801	181143800	5000	*	1.23729
chr4	181258801	181278800	20000	*	2.00831
chr4	181563801	181573800	10000	*	1.17064
chr4	187028796	187038795	10000	*	1.05101
chr4	187378796	187393795	15000	*	1.14754
chr4	187993795	187998794	5000	*	1.40941
chr4	188468795	188473794	5000	*	1.00343
chr4	188648795	188653794	5000	*	1.15395
chr4	190118794	190123793	5000	*	1.03589
chr5	479238	489237	10000	*	1.06315
chr5	774238	779237	5000	*	1.12742
chr5	1239238	1249237	10000	*	1.01027
chr5	1649237	1659236	10000	*	1.20192
chr5	2099237	2104236	5000	*	1.42823
chr5	2579237	2584236	5000	*	1.4078
chr5	3014236	3019235	5000	*	1.06212
chr5	4109235	4114234	5000	*	1.03949
chr5	4954235	4964234	10000	*	1.41986
chr5	7389233	7404232	15000	*	1.3261
chr5	7799233	7804232	5000	*	1.10202
chr5	8009232	8014231	5000	*	1.06481
chr5	10189231	10199230	10000	*	1.13454
chr5	10594230	10604229	10000	*	1.15921
chr5	11399230	11404229	5000	*	1.17592
chr5	12259229	12264228	5000	*	1.21054
chr5	14914227	14919226	5000	*	1.20285
chr5	15274227	15279226	5000	*	1.29449
chr5	15819226	15824225	5000	*	1.09544
chr5	16144226	16154225	10000	*	1.97884
chr5	16374226	16394225	20000	*	1.01636
chr5	16849225	16854224	5000	*	1.04354
chr5	17964224	17974223	10000	*	1.05191
chr5	18189224	18194223	5000	*	1.37777
chr5	18594224	18599223	5000	*	1.08495
chr5	19599223	19604222	5000	*	1.02651
chr5	20189223	20194222	5000	*	1.00086
chr5	20214223	20229222	15000	*	1.05844
chr5	20504222	20514221	10000	*	1.45009
chr5	21194222	21199221	5000	*	1.1015
chr5	21919221	21929220	10000	*	1.31438
chr5	22369221	22379220	10000	*	1.03261
chr5	23029220	23034219	5000	*	1.2749
chr5	23559220	23569219	10000	*	1.08921
chr5	23699220	23704219	5000	*	1.04024
chr5	24374219	24379218	5000	*	1.19395
chr5	26229218	26234217	5000	*	1.04647
chr5	26954217	26964216	10000	*	1.44458
chr5	27404217	27424216	20000	*	1.09895
chr5	27424217	27434216	10000	*	1.03419
chr5	28544216	28554215	10000	*	1.04575
chr5	28784216	28789215	5000	*	1.00334
chr5	28814216	28819215	5000	*	1.03832
chr5	28999216	29009215	10000	*	1.01818
chr5	29019216	29024215	5000	*	1.03576
chr5	29674215	29679214	5000	*	1.49653
chr5	30219215	30224214	5000	*	1.36624
chr5	30519215	30524214	5000	*	1.05129
chr5	31684214	31694213	10000	*	1.05883
chr5	31944213	31949212	5000	*	1.294
chr5	32184213	32199212	15000	*	1.16472
chr5	32354213	32364212	10000	*	1.59616
chr5	32379213	32389212	10000	*	1.17794
chr5	32419213	32424212	5000	*	1.41086
chr5	32909213	32924212	15000	*	1.34682
chr5	33229212	33234211	5000	*	1.01207
chr5	33604212	33614211	10000	*	1.26444
chr5	33639212	33644211	5000	*	1.6542
chr5	33964212	33969211	5000	*	1.00805
chr5	34289212	34309210	19999	*	1.36375
chr5	35004211	35009210	5000	*	1.14774
chr5	36044210	36049209	5000	*	1.17369
chr5	37254209	37274208	20000	*	1.14657
chr5	38149208	38164207	15000	*	1.2286
chr5	38919208	38924207	5000	*	1.18544
chr5	39669207	39674206	5000	*	1.02188
chr5	39884207	39894206	10000	*	1.01947
chr5	40304207	40314206	10000	*	1.52041
chr5	40509207	40514206	5000	*	1.25527
chr5	40624206	40629205	5000	*	1.1749
chr5	40814206	40829205	15000	*	1.20846
chr5	40874206	40884205	10000	*	1.25048
chr5	41469206	41474205	5000	*	1.06331
chr5	41959205	41964204	5000	*	1.25264
chr5	42274205	42279204	5000	*	1.35111
chr5	43204204	43219203	15000	*	1.05771
chr5	43704204	43719203	15000	*	1.2893
chr5	44054204	44064203	10000	*	1.03123
chr5	50404199	50409198	5000	*	1.04005
chr5	51469198	51494197	25000	*	1.16016
chr5	52034197	52039196	5000	*	1.06933
chr5	53024197	53029196	5000	*	1.26374
chr5	53649196	53654195	5000	*	1.05153
chr5	54079196	54089195	10000	*	1.1696
chr5	54369196	54384195	15000	*	1.29712
chr5	54604195	54614194	10000	*	1.21758
chr5	54629195	54634194	5000	*	1.46393
chr5	55354195	55364194	10000	*	1.01664
chr5	55839194	55849193	10000	*	1.08481
chr5	56594194	56604193	10000	*	1.11999
chr5	56789194	56814193	25000	*	1.12304
chr5	57604193	57614192	10000	*	1.03013
chr5	57669193	57674192	5000	*	1.14352
chr5	58969192	58984191	15000	*	1.03576
chr5	59034192	59039191	5000	*	1.0692
chr5	59719191	59724190	5000	*	1.12947
chr5	59814191	59829190	15000	*	1.14035
chr5	60064191	60079190	15000	*	1.05875
chr5	60194191	60199190	5000	*	1.45461
chr5	60344191	60349190	5000	*	1.20005
chr5	60684191	60694190	10000	*	1.02696
chr5	60839190	60844189	5000	*	1.30467
chr5	61399190	61404189	5000	*	1.09034
chr5	61504190	61509189	5000	*	1.47692
chr5	61829190	61834189	5000	*	1.50693
chr5	61849190	61854189	5000	*	1.02415
chr5	62579189	62584188	5000	*	1.03465
chr5	63994188	63999187	5000	*	1.38851
chr5	64254188	64259187	5000	*	1.01745
chr5	64539188	64554187	15000	*	2.29098
chr5	64729187	64734186	5000	*	1.0619
chr5	64899187	64904186	5000	*	1.29842
chr5	65109187	65114186	5000	*	1.22124
chr5	65199187	65209186	10000	*	1.05349
chr5	65914186	65924185	10000	*	1.16396
chr5	66459186	66464185	5000	*	1.19395
chr5	66884186	66889185	5000	*	1.05025
chr5	66919186	66924185	5000	*	1.0797
chr5	67019186	67024185	5000	*	1.03955
chr5	68544184	68564183	20000	*	1.24139
chr5	69114184	69119183	5000	*	1.1775
chr5	73189181	73199180	10000	*	1.14296
chr5	73264181	73269180	5000	*	1.03047
chr5	74384180	74389179	5000	*	1.07631
chr5	74809179	74819178	10000	*	1.00316
chr5	76234178	76239177	5000	*	1.23388
chr5	76254178	76259177	5000	*	1.4737
chr5	77914177	77919176	5000	*	1.22142
chr5	78884176	78889175	5000	*	1.08543
chr5	79254176	79259175	5000	*	1.15488
chr5	79679176	79684175	5000	*	1.01513
chr5	79939175	79944174	5000	*	1.04857
chr5	80364175	80369174	5000	*	1.12211
chr5	80629175	80644174	15000	*	1.11245
chr5	82534173	82549172	15000	*	1.04368
chr5	83244173	83254172	10000	*	1.0934
chr5	83839172	83844171	5000	*	1.00487
chr5	87699169	87704168	5000	*	1.08447
chr5	88739168	88744167	5000	*	1.15654
chr5	89074168	89079167	5000	*	1.16087
chr5	92204166	92209165	5000	*	1.76496
chr5	92899165	92904164	5000	*	1.18222
chr5	93149165	93154164	5000	*	1.10793
chr5	93289165	93299164	10000	*	1.00545
chr5	93954164	93959163	5000	*	1.18109
chr5	94039164	94049163	10000	*	1.06211
chr5	94914163	94924162	10000	*	1.06092
chr5	95469163	95474162	5000	*	1.07276
chr5	96204162	96209161	5000	*	1.00627
chr5	98119161	98129160	10000	*	1.53958
chr5	99539160	99549159	10000	*	1.40416
chr5	100804159	100814158	10000	*	1.33833
chr5	101099159	101104158	5000	*	1.23331
chr5	101449158	101454157	5000	*	1.38309
chr5	101594158	101599157	5000	*	1.53002
chr5	103144157	103149156	5000	*	1.28615
chr5	103389157	103394156	5000	*	1.15921
chr5	105584155	105604154	20000	*	1.10401
chr5	108104153	108119152	15000	*	1.27434
chr5	109384152	109389151	5000	*	1.04238
chr5	109574152	109584151	10000	*	1.16362
chr5	109844152	109849151	5000	*	1.11345
chr5	109859152	109864151	5000	*	1.1478
chr5	110084151	110094150	10000	*	1.02
chr5	110104151	110114150	10000	*	1.10688
chr5	110444151	110459150	15000	*	1.04832
chr5	110819151	110824150	5000	*	1.01087
chr5	110839151	110854150	15000	*	1.26658
chr5	111619150	111644149	25000	*	1.07184
chr5	112799149	112814148	15000	*	1.04543
chr5	112959149	112974148	15000	*	1.19972
chr5	113174149	113179148	5000	*	1.31334
chr5	115084147	115089146	5000	*	1.01171
chr5	116674146	116679145	5000	*	1.19826
chr5	116714146	116719145	5000	*	1.26529
chr5	117419146	117429145	10000	*	1.2197
chr5	118024145	118029144	5000	*	1.07958
chr5	118029145	118034144	5000	*	1.01075
chr5	120559143	120564142	5000	*	1.01941
chr5	120709143	120714142	5000	*	1.07585
chr5	121579142	121594141	15000	*	1.35367
chr5	122949141	122954140	5000	*	1.28354
chr5	123099141	123104140	5000	*	1.1453
chr5	124094140	124099139	5000	*	1.08773
chr5	124129140	124134139	5000	*	1.06245
chr5	124904140	124914139	10000	*	1.10098
chr5	125104139	125119138	15000	*	1.28661
chr5	125584139	125599138	15000	*	1.00727
chr5	126544138	126549137	5000	*	1.11121
chr5	126644138	126649137	5000	*	1.18444
chr5	127134138	127139137	5000	*	1.04839
chr5	128259137	128264136	5000	*	1.6843
chr5	129334136	129339135	5000	*	1.01886
chr5	130809135	130824134	15000	*	1.02763
chr5	131834134	131839133	5000	*	1.01675
chr5	132544134	132549133	5000	*	1.17324
chr5	133989132	133999131	10000	*	1.01029
chr5	135099132	135104131	5000	*	1.05798
chr5	136439130	136449129	10000	*	1.03761
chr5	140194128	140199127	5000	*	1.12353
chr5	142439126	142449125	10000	*	1.2586
chr5	142974125	142984124	10000	*	1.47038
chr5	144754124	144759123	5000	*	1.0245
chr5	145329123	145334122	5000	*	1.02453
chr5	145604123	145609122	5000	*	1.04473
chr5	145759123	145764122	5000	*	1.2459
chr5	145944123	145949122	5000	*	1.07196
chr5	146024123	146029122	5000	*	1.13683
chr5	148079121	148089120	10000	*	1.01109
chr5	148094121	148099120	5000	*	1.02897
chr5	148109121	148114120	5000	*	1.15654
chr5	149264120	149274119	10000	*	1.14207
chr5	149669120	149674119	5000	*	1.04091
chr5	150074120	150084119	10000	*	1.23736
chr5	150214120	150219119	5000	*	1.10971
chr5	150599119	150614118	15000	*	1.39374
chr5	150804119	150809118	5000	*	1.02696
chr5	151189119	151204118	15000	*	1.08836
chr5	153134117	153139116	5000	*	1.26716
chr5	153139117	153149116	10000	*	1.17253
chr5	153149117	153169116	20000	*	1.03451
chr5	153999117	154004116	5000	*	1.02781
chr5	154394116	154409115	15000	*	1.07363
chr5	155129116	155144115	15000	*	1.02287
chr5	156554115	156559114	5000	*	1.16013
chr5	156964114	156969113	5000	*	1.02317
chr5	157269114	157274113	5000	*	1.274
chr5	157999113	158014112	15000	*	1.0031
chr5	158059113	158064112	5000	*	1.29403
chr5	158124113	158129112	5000	*	1.07855
chr5	159649112	159659111	10000	*	1.21872
chr5	162149110	162154109	5000	*	1.32778
chr5	162489110	162499109	10000	*	1.00018
chr5	163169109	163174108	5000	*	1.01107
chr5	163484109	163489108	5000	*	1.03839
chr5	163839109	163844108	5000	*	1.39821
chr5	164724108	164729107	5000	*	1.04577
chr5	164734108	164739107	5000	*	1.15346
chr5	165704107	165709106	5000	*	1.06923
chr5	166204107	166209106	5000	*	1.2419
chr5	166259107	166264106	5000	*	1.05683
chr5	167454106	167459105	5000	*	1.06354
chr5	167799106	167819105	20000	*	1.26514
chr5	168629105	168639104	10000	*	1.0474
chr5	169729104	169734103	5000	*	1.01791
chr5	169759104	169789103	30000	*	1.11603
chr5	172409102	172414101	5000	*	1.25523
chr5	174949100	174954099	5000	*	1.18663
chr5	175724099	175759098	35000	*	1.28885
chr5	177439098	177449097	10000	*	1.05422
chr5	178849097	178854096	5000	*	1.07588
chr5	179424096	179429095	5000	*	1.13679
chr5	179809096	179829095	20000	*	1.08784
chr5	180039096	180044095	5000	*	1.13161
chr5	180084096	180089095	5000	*	1.08959
chr5	180244096	180249095	5000	*	1.0093
chr5	180509096	180514095	5000	*	1.03329
chr5	181109095	181124094	15000	*	1.16423
chr6	1640834	1650833	10000	*	1.14207
chr6	5175832	5180831	5000	*	1.04771
chr6	5215832	5225831	10000	*	1.01838
chr6	5455831	5460830	5000	*	1.0541
chr6	5835831	5840830	5000	*	1.16341
chr6	6690830	6695829	5000	*	1.32782
chr6	8170829	8175828	5000	*	1.00972
chr6	8510829	8520828	10000	*	1.02443
chr6	9375828	9385827	10000	*	1.22146
chr6	10515827	10525826	10000	*	1.46118
chr6	11330827	11340826	10000	*	1.02897
chr6	12525826	12530825	5000	*	1.04645
chr6	12845826	12850825	5000	*	1.33201
chr6	13225825	13245824	20000	*	1.0033
chr6	13390825	13395824	5000	*	1.21373
chr6	14055825	14060824	5000	*	1.51907
chr6	14120825	14130823	9999	*	1.06398
chr6	14635824	14640823	5000	*	1.22141
chr6	14775824	14780823	5000	*	1.05449
chr6	16245823	16250822	5000	*	1.04264
chr6	16335823	16340822	5000	*	1.21342
chr6	17610822	17630821	20000	*	1.38833
chr6	17715822	17725821	10000	*	1.12238
chr6	17845822	17850821	5000	*	1.01204
chr6	19750820	19760819	10000	*	1.05318
chr6	21700818	21710817	10000	*	1.18743
chr6	22360818	22370817	10000	*	1.29987
chr6	23395817	23430816	35000	*	1.07452
chr6	24400816	24415815	15000	*	1.19298
chr6	24995816	25010815	15000	*	1.15843
chr6	25240816	25245815	5000	*	1.08499
chr6	25280816	25285815	5000	*	1.20953
chr6	25895815	25905814	10000	*	1.27809
chr6	26620815	26625814	5000	*	1.05547
chr6	27070814	27080813	10000	*	1.45581
chr6	27220814	27225813	5000	*	1.08485
chr6	27245814	27260813	15000	*	1.00731
chr6	27485814	27495813	10000	*	1.14417
chr6	27570814	27580813	10000	*	1.42367
chr6	27755814	27770813	15000	*	1.20039
chr6	28020813	28040812	20000	*	1.02665
chr6	28075813	28080812	5000	*	1.47253
chr6	28090813	28095812	5000	*	1.00262
chr6	28180813	28200812	20000	*	1.33486
chr6	30030812	30045811	15000	*	1.13452
chr6	30200812	30205811	5000	*	1.37291
chr6	30250812	30255811	5000	*	1.04821
chr6	32105810	32110809	5000	*	1.17814
chr6	34640808	34660807	20000	*	1.1006
chr6	35570807	35580806	10000	*	1.31048
chr6	35655807	35660806	5000	*	1.05028
chr6	35875807	35880806	5000	*	1.16195
chr6	37495806	37505805	10000	*	1.41853
chr6	37680806	37685805	5000	*	1.06737
chr6	37955806	37960805	5000	*	1.00124
chr6	39130805	39145804	15000	*	1.33958
chr6	39280805	39285804	5000	*	1.02648
chr6	39525804	39530803	5000	*	1.01754
chr6	41545803	41550802	5000	*	1.00225
chr6	42010802	42015801	5000	*	1.05743
chr6	42285802	42290801	5000	*	1.01771
chr6	43605801	43610800	5000	*	1.27372
chr6	43995801	44000800	5000	*	1.07798
chr6	44175801	44185800	10000	*	1.40596
chr6	44300801	44305800	5000	*	1.38054
chr6	44505800	44510799	5000	*	1.23584
chr6	44790800	44795799	5000	*	1.05633
chr6	45330800	45335799	5000	*	1.07899
chr6	45835799	45840798	5000	*	1.05486
chr6	46865799	46885798	20000	*	1.1737
chr6	47175798	47185797	10000	*	1.17998
chr6	47565798	47570797	5000	*	1.09484
chr6	47775798	47780797	5000	*	1.00212
chr6	49760796	49770795	10000	*	1.04735
chr6	49855796	49860795	5000	*	1.08273
chr6	50320796	50325795	5000	*	1.17203
chr6	50715795	50725794	10000	*	1.37469
chr6	50845795	50850794	5000	*	1.00354
chr6	51030795	51035794	5000	*	1.29034
chr6	52740794	52745793	5000	*	1.15003
chr6	53515793	53520792	5000	*	1.108
chr6	53570793	53580792	10000	*	1.07319
chr6	54135793	54140792	5000	*	1.14199
chr6	54175793	54180792	5000	*	1.12032
chr6	54640792	54655791	15000	*	1.00212
chr6	54890792	54895791	5000	*	1.19227
chr6	56490791	56495790	5000	*	1.02628
chr6	56570791	56575790	5000	*	1.81412
chr6	56575791	56590790	15000	*	1.29276
chr6	56610791	56615790	5000	*	1.0809
chr6	56765791	56775790	10000	*	1.43321
chr6	56795791	56810790	15000	*	1.01195
chr6	56855791	56865790	10000	*	1.47431
chr6	60365788	60370787	5000	*	1.11565
chr6	60480788	60490787	10000	*	1.03139
chr6	60950787	60955786	5000	*	1.05902
chr6	61110787	61115786	5000	*	1.14264
chr6	61210787	61230786	20000	*	1.00167
chr6	61960787	61970786	10000	*	1.47431
chr6	62315786	62320785	5000	*	1.04177
chr6	62600786	62605785	5000	*	1.09535
chr6	62965786	62970785	5000	*	1.02365
chr6	63220786	63230785	10000	*	1.0473
chr6	64295785	64300784	5000	*	1.23407
chr6	64520785	64525784	5000	*	1.1198
chr6	65245784	65265783	20000	*	1.17439
chr6	65470784	65475783	5000	*	1.04684
chr6	66615783	66630782	15000	*	1.06237
chr6	67010783	67020782	10000	*	1.19459
chr6	67710782	67715781	5000	*	1.02729
chr6	68095782	68100781	5000	*	1.05842
chr6	68785781	68805780	20000	*	1.4646
chr6	68810781	68815780	5000	*	1.17317
chr6	68880781	68890780	10000	*	1.19837
chr6	69220781	69225780	5000	*	1.05237
chr6	69295781	69310780	15000	*	1.17366
chr6	69395781	69400780	5000	*	1.0403
chr6	69475781	69480780	5000	*	1.08207
chr6	70305780	70315779	10000	*	1.4222
chr6	70610780	70615779	5000	*	1.29736
chr6	70835780	70845779	10000	*	1.21689
chr6	71170779	71175778	5000	*	1.04934
chr6	71360779	71370778	10000	*	1.04405
chr6	71455779	71460778	5000	*	1.22411
chr6	74025777	74035776	10000	*	1.16386
chr6	74320777	74325776	5000	*	1.26023
chr6	75335776	75345775	10000	*	1.12614
chr6	76075775	76080774	5000	*	1.18488
chr6	76210775	76215774	5000	*	1.09477
chr6	76425775	76445774	20000	*	1.58827
chr6	76915775	76925774	10000	*	1.09266
chr6	78205774	78210773	5000	*	1.49834
chr6	79505773	79515772	10000	*	1.4965
chr6	79835772	79850771	15000	*	1.16893
chr6	80025772	80030771	5000	*	1.20868
chr6	80505772	80510771	5000	*	1.13285
chr6	80645772	80650771	5000	*	1.2468
chr6	81680771	81685770	5000	*	1.17899
chr6	81705771	81720770	15000	*	1.06566
chr6	83020770	83025769	5000	*	1.0314
chr6	83560769	83570768	10000	*	1.19588
chr6	83790769	83820768	30000	*	1.32012
chr6	84550769	84555768	5000	*	1.06278
chr6	85440768	85445767	5000	*	1.12
chr6	87025767	87035766	10000	*	1.0009
chr6	87560766	87565765	5000	*	1.45396
chr6	87835766	87840765	5000	*	1.09947
chr6	88735765	88740764	5000	*	1.03686
chr6	89025765	89035764	10000	*	1.1344
chr6	89175765	89190764	15000	*	1.01415
chr6	89425765	89450764	25000	*	1.06576
chr6	89835764	89850763	15000	*	1.24627
chr6	90630764	90645763	15000	*	1.04393
chr6	91350763	91355762	5000	*	1.04061
chr6	91490763	91495762	5000	*	1.08524
chr6	91915763	91920762	5000	*	1.01204
chr6	92625762	92640761	15000	*	1.27496
chr6	93080762	93085761	5000	*	1.07458
chr6	93570761	93575760	5000	*	1.27
chr6	94015761	94025760	10000	*	1.18712
chr6	94070761	94075760	5000	*	1.01584
chr6	94295761	94300760	5000	*	1.37946
chr6	94345761	94350760	5000	*	1.02495
chr6	94665761	94670760	5000	*	1.0212
chr6	94840760	94845759	5000	*	1.19353
chr6	94875760	94885759	10000	*	1.27977
chr6	95170760	95175759	5000	*	1.13758
chr6	95235760	95240759	5000	*	1.04812
chr6	95675760	95680759	5000	*	1.56248
chr6	96990759	96995758	5000	*	1.47009
chr6	97255759	97260758	5000	*	1.22012
chr6	97370758	97375757	5000	*	1.02753
chr6	99585757	99590756	5000	*	1.00861
chr6	100920756	100940755	20000	*	1.57065
chr6	101000756	101010755	10000	*	1.07609
chr6	102360755	102365754	5000	*	1.00212
chr6	102560754	102565753	5000	*	1.03065
chr6	103440754	103455753	15000	*	1.73815
chr6	103905753	103915752	10000	*	1.48389
chr6	104440753	104450752	10000	*	1.19017
chr6	104545753	104560752	15000	*	1.3729
chr6	105595752	105605751	10000	*	1.28063
chr6	105710752	105720751	10000	*	1.52357
chr6	105850752	105855751	5000	*	1.00995
chr6	106070752	106075751	5000	*	1.09527
chr6	108750749	108755748	5000	*	1.20338
chr6	109595749	109615748	20000	*	1.90122
chr6	110020748	110025747	5000	*	1.01521
chr6	110225748	110235747	10000	*	1.08178
chr6	110335748	110340747	5000	*	1.05293
chr6	110400748	110410747	10000	*	1.08743
chr6	110750748	110770747	20000	*	1.18088
chr6	112610746	112630745	20000	*	1.04475
chr6	113625746	113635745	10000	*	1.00303
chr6	114940745	114945744	5000	*	1.14859
chr6	115715744	115720743	5000	*	1.23757
chr6	116435743	116440742	5000	*	1.12062
chr6	117130743	117135742	5000	*	1.29958
chr6	118250742	118265741	15000	*	1.04819
chr6	118270742	118275741	5000	*	1.55993
chr6	118985741	118990740	5000	*	1.388
chr6	119150741	119180740	30000	*	1.22049
chr6	119365741	119370740	5000	*	1.12685
chr6	119540741	119545740	5000	*	1.28134
chr6	119655741	119660740	5000	*	1.25578
chr6	121060740	121065739	5000	*	1.16959
chr6	121680739	121700738	20000	*	1.04878
chr6	123120738	123130737	10000	*	1.98319
chr6	123190738	123200737	10000	*	1.08613
chr6	123200738	123230737	30000	*	1.50298
chr6	123550738	123555737	5000	*	1.16386
chr6	124005737	124015736	10000	*	1.2076
chr6	124445737	124450736	5000	*	1.10773
chr6	125160736	125165735	5000	*	1.51864
chr6	125715736	125745735	30000	*	1.21371
chr6	125855736	125870735	15000	*	1.36705
chr6	127175735	127200734	25000	*	1.15811
chr6	127365735	127370734	5000	*	1.05344
chr6	128160734	128165733	5000	*	1.00894
chr6	128205734	128215733	10000	*	1.01415
chr6	129455733	129460732	5000	*	1.0695
chr6	130805732	130835731	30000	*	1.21143
chr6	130905732	130915731	10000	*	1.12954
chr6	132435731	132445730	10000	*	1.00911
chr6	132610731	132620730	10000	*	1.28792
chr6	133165730	133175729	10000	*	1.62193
chr6	133325730	133330729	5000	*	1.06341
chr6	133385730	133395729	10000	*	1.17674
chr6	134320729	134335728	15000	*	1.03088
chr6	136800727	136805726	5000	*	1.12246
chr6	137395727	137410726	15000	*	1.17555
chr6	138400726	138425725	25000	*	1.20805
chr6	138520726	138545725	25000	*	1.27878
chr6	138700726	138710725	10000	*	1.10094
chr6	139190725	139195724	5000	*	1.14687
chr6	139220725	139240724	20000	*	1.4125
chr6	139385725	139395724	10000	*	1.11945
chr6	139490725	139495724	5000	*	1.04733
chr6	139945725	139950724	5000	*	1.20239
chr6	140065725	140070724	5000	*	1.06264
chr6	140345724	140350723	5000	*	1.02115
chr6	140520724	140525723	5000	*	1.20173
chr6	142685723	142690722	5000	*	1.69705
chr6	142740722	142750721	10000	*	1.25796
chr6	143035722	143040721	5000	*	1.01735
chr6	143305722	143315721	10000	*	1.36795
chr6	143530722	143535721	5000	*	1.41438
chr6	143590722	143595721	5000	*	1.01735
chr6	143805722	143815721	10000	*	1.37107
chr6	143870722	143890721	20000	*	1.48091
chr6	143995721	144005720	10000	*	1.24487
chr6	144005721	144020720	15000	*	1.33872
chr6	145065721	145080720	15000	*	1.04566
chr6	147185719	147190718	5000	*	1.10974
chr6	148155718	148200717	45000	*	1.22931
chr6	148255718	148270717	15000	*	1.01729
chr6	148560718	148570717	10000	*	1.14685
chr6	150020717	150025716	5000	*	1.01266
chr6	150465716	150470715	5000	*	1.01986
chr6	151060716	151070715	10000	*	1.07301
chr6	151290716	151295715	5000	*	1.02946
chr6	152075715	152080714	5000	*	1.04803
chr6	152210715	152215714	5000	*	1.00507
chr6	152510715	152515714	5000	*	1.03968
chr6	152840714	152850713	10000	*	1.02419
chr6	152935714	152940713	5000	*	1.15837
chr6	153525714	153530713	5000	*	1.24994
chr6	154910713	154920712	10000	*	1.40875
chr6	155235713	155245712	10000	*	1.33922
chr6	155450712	155455711	5000	*	1.10845
chr6	155965712	155975711	10000	*	1.001
chr6	156330712	156340711	10000	*	1.01249
chr6	156505712	156515711	10000	*	1.19267
chr6	157790711	157795710	5000	*	1.41343
chr6	158500710	158505709	5000	*	1.09134
chr6	159175709	159180708	5000	*	1.36642
chr6	159940709	159945708	5000	*	1.20808
chr6	160950708	160975707	25000	*	1.27372
chr6	161155708	161160707	5000	*	1.0443
chr6	161320708	161325707	5000	*	1.18776
chr6	161520708	161525707	5000	*	1.08997
chr6	161740707	161745706	5000	*	1.12311
chr6	161745707	161755706	10000	*	1.11071
chr6	161775707	161780706	5000	*	1.05541
chr6	161785707	161790706	5000	*	1.37341
chr6	163015706	163020705	5000	*	1.06832
chr6	163335706	163345705	10000	*	1.26937
chr6	164365705	164375704	10000	*	1.09999
chr6	164375705	164390704	15000	*	1.0818
chr6	164660705	164665704	5000	*	1.30502
chr6	164725705	164730704	5000	*	1.19732
chr6	166555704	166570703	15000	*	1.30611
chr6	167060703	167070702	10000	*	1.19053
chr6	167225703	167230702	5000	*	1.36519
chr6	167335703	167345702	10000	*	1.07903
chr6	167760703	167765702	5000	*	1.01415
chr6	168045702	168070701	25000	*	1.33352
chr6	168240702	168250701	10000	*	1.1475
chr6	169855701	169860700	5000	*	1.11148
chr6	170180701	170185700	5000	*	1.03396
chr6	170275701	170280700	5000	*	1.40341
chr6	170335701	170345700	10000	*	1.11255
chr6	170460700	170465699	5000	*	1.12683
chr7	1174720	1189719	15000	*	1.11072
chr7	1969720	1984719	15000	*	1.1109
chr7	2459719	2469718	10000	*	1.26762
chr7	3264719	3269718	5000	*	1.40201
chr7	4239718	4244717	5000	*	1.09039
chr7	4319718	4334717	15000	*	1.30797
chr7	4554718	4559717	5000	*	1.05282
chr7	4969717	4984716	15000	*	1.01284
chr7	5854717	5859716	5000	*	1.13411
chr7	7094716	7104715	10000	*	1.00909
chr7	8129715	8149714	20000	*	1.25996
chr7	8204715	8209714	5000	*	1.00682
chr7	8209715	8214714	5000	*	2.08895
chr7	8219715	8224714	5000	*	1.05076
chr7	8259715	8269714	10000	*	1.16009
chr7	8349715	8359714	10000	*	1.11472
chr7	9039714	9049713	10000	*	1.09292
chr7	10639713	10644712	5000	*	1.12121
chr7	11769712	11779711	10000	*	1.01781
chr7	12604711	12624710	20000	*	1.06618
chr7	13474711	13479710	5000	*	1.17953
chr7	13729710	13734709	5000	*	1.2838
chr7	13889710	13894709	5000	*	1.18725
chr7	14164710	14169709	5000	*	1.39226
chr7	14629710	14634709	5000	*	1.0079
chr7	14899709	14909708	10000	*	1.33203
chr7	17549707	17554706	5000	*	1.17286
chr7	18079707	18084706	5000	*	1.65486
chr7	18634706	18644705	10000	*	1.10574
chr7	18929706	18934705	5000	*	1.22208
chr7	20109705	20124704	15000	*	1.3778
chr7	20134705	20144704	10000	*	1.10883
chr7	20189705	20194704	5000	*	1.15934
chr7	22734703	22759702	25000	*	1.01672
chr7	22769703	22774702	5000	*	1.26473
chr7	22819703	22829702	10000	*	1.14878
chr7	25229701	25244700	15000	*	1.06331
chr7	26534700	26549699	15000	*	1.34331
chr7	26619700	26624699	5000	*	1.02141
chr7	27079700	27089699	10000	*	1.01412
chr7	28474699	28484698	10000	*	1.2801
chr7	30554697	30564696	10000	*	1.11703
chr7	30754697	30759696	5000	*	1.14868
chr7	31339696	31349695	10000	*	1.127
chr7	31714696	31719695	5000	*	1.19335
chr7	31904696	31909695	5000	*	1.00717
chr7	32209696	32214695	5000	*	1.41872
chr7	32249696	32254695	5000	*	1.01409
chr7	35194693	35199692	5000	*	1.04155
chr7	35344693	35349692	5000	*	1.06618
chr7	35444693	35449692	5000	*	1.07963
chr7	35614693	35624692	10000	*	1.01897
chr7	35794693	35809692	15000	*	1.13336
chr7	37594691	37604690	10000	*	1.20485
chr7	38224691	38229690	5000	*	1.05673
chr7	38229691	38234690	5000	*	1.02479
chr7	38714691	38719690	5000	*	1.02642
chr7	39299690	39309689	10000	*	1.09488
chr7	39344690	39364689	20000	*	1.20086
chr7	39364690	39374689	10000	*	1.06416
chr7	41599688	41604687	5000	*	1.29276
chr7	41794688	41819687	25000	*	1.3176
chr7	44524686	44529685	5000	*	1.14672
chr7	44659686	44664685	5000	*	1.07112
chr7	45389685	45394684	5000	*	1.0094
chr7	45994685	45999684	5000	*	1.0554
chr7	47454684	47469683	15000	*	1.099
chr7	48119683	48129682	10000	*	1.05604
chr7	48339683	48349682	10000	*	1.60166
chr7	48519683	48524682	5000	*	1.2838
chr7	48869682	48879681	10000	*	1.14651
chr7	49559682	49564681	5000	*	1.08715
chr7	50614681	50624680	10000	*	1.12751
chr7	51024681	51034680	10000	*	1.05325
chr7	51119681	51124680	5000	*	1.03168
chr7	53609679	53634678	25000	*	1.22671
chr7	54929678	54934677	5000	*	1.02502
chr7	56289677	56294676	5000	*	1.10321
chr7	56539676	56544675	5000	*	1.05549
chr7	57099676	57104675	5000	*	1.00173
chr7	63074671	63084670	10000	*	1.19666
chr7	63809671	63814670	5000	*	1.18735
chr7	66599668	66609667	10000	*	1.0547
chr7	66769668	66774667	5000	*	1.24458
chr7	67394668	67399667	5000	*	1.17428
chr7	67889667	67894666	5000	*	1.46479
chr7	68194667	68204666	10000	*	1.10059
chr7	68214667	68224666	10000	*	1.04483
chr7	68559667	68574666	15000	*	1.25523
chr7	68579667	68584666	5000	*	1.09588
chr7	68714667	68724666	10000	*	1.01849
chr7	69994666	70004665	10000	*	1.05004
chr7	70669665	70674664	5000	*	1.15838
chr7	72274664	72279663	5000	*	1.07279
chr7	72724664	72729663	5000	*	1.02365
chr7	73474663	73484662	10000	*	1.45543
chr7	73619663	73629662	10000	*	1.16936
chr7	73744663	73749662	5000	*	1.02522
chr7	74119662	74124661	5000	*	1.28029
chr7	74319662	74324661	5000	*	1.08723
chr7	75754661	75774660	20000	*	1.02904
chr7	76404661	76414660	10000	*	1.25106
chr7	77714660	77734659	20000	*	1.00335
chr7	77774660	77779659	5000	*	1.27173
chr7	78054659	78069658	15000	*	1.04013
chr7	78204659	78209658	5000	*	1.05972
chr7	79104658	79109657	5000	*	1.34791
chr7	80134658	80139657	5000	*	1.29941
chr7	80464657	80469656	5000	*	1.13499
chr7	80514657	80529656	15000	*	1.27594
chr7	81484657	81504656	20000	*	1.07873
chr7	81639656	81649655	10000	*	1.10543
chr7	83554655	83559654	5000	*	1.00682
chr7	83649655	83679654	30000	*	1.14867
chr7	83934655	83939654	5000	*	1.01249
chr7	84914654	84924653	10000	*	1.05409
chr7	85189654	85199653	10000	*	1.05425
chr7	85364654	85374652	9999	*	1.13426
chr7	86544653	86549652	5000	*	1.00773
chr7	87629652	87659651	30000	*	1.19008
chr7	88694651	88699650	5000	*	1.03369
chr7	89789650	89799649	10000	*	1.04521
chr7	89954650	89959649	5000	*	1.14552
chr7	90504649	90509648	5000	*	1.11127
chr7	91099649	91104648	5000	*	1.05482
chr7	92329648	92334647	5000	*	1.18735
chr7	93974647	93984646	10000	*	1.1385
chr7	94179647	94184646	5000	*	1.02711
chr7	94339646	94344645	5000	*	1.44696
chr7	94424646	94434645	10000	*	1.07064
chr7	94734646	94744645	10000	*	1.08929
chr7	95114646	95119645	5000	*	1.23211
chr7	95854645	95859644	5000	*	1.27261
chr7	95994645	96009644	15000	*	1.03401
chr7	96944644	96954643	10000	*	1.39808
chr7	97129644	97149643	20000	*	1.36321
chr7	97424644	97439643	15000	*	1.32591
chr7	98749643	98759642	10000	*	1.26388
chr7	100289642	100294641	5000	*	1.05141
chr7	100484642	100489641	5000	*	1.15328
chr7	100529641	100534640	5000	*	1.54633
chr7	100554641	100559640	5000	*	1.61898
chr7	101054641	101069640	15000	*	1.2795
chr7	101484641	101489640	5000	*	1.08113
chr7	101709641	101714640	5000	*	1.14471
chr7	102864640	102869639	5000	*	1.04634
chr7	103674639	103689638	15000	*	1.22201
chr7	103784639	103789638	5000	*	1.03817
chr7	104139639	104164638	25000	*	1.2077
chr7	104184639	104204638	20000	*	1.02439
chr7	105279638	105294637	15000	*	1.08217
chr7	106774637	106779636	5000	*	1.11114
chr7	107049636	107054635	5000	*	1.10185
chr7	107904636	107909635	5000	*	1.48464
chr7	108714635	108734634	20000	*	1.37175
chr7	109644634	109659633	15000	*	1.14055
[truncated: 7,867 more rows]

## Sheet: H3K14ac_DLD1
chr1	270001	275000	5000	*	1.11358
chr1	1095001	1110000	15000	*	1.03287
chr1	1175001	1185000	10000	*	1.06806
chr1	1370000	1374999	5000	*	1.28064
chr1	1395000	1404999	10000	*	1.06822
chr1	1430000	1444999	15000	*	1.04787
chr1	1470000	1474999	5000	*	1.09185
chr1	1715000	1719999	5000	*	1.0353
chr1	1725000	1754999	30000	*	1.37773
chr1	1960000	1964999	5000	*	1.66661
chr1	2100000	2114999	15000	*	1.05413
chr1	2579999	2594998	15000	*	1.03972
chr1	2819999	2844998	25000	*	1.14843
chr1	3699999	3704998	5000	*	1.12403
chr1	4204998	4209997	5000	*	1.09171
chr1	4824998	4834997	10000	*	1.16785
chr1	4869998	4889997	20000	*	1.18294
chr1	5029998	5049996	19999	*	1.01967
chr1	5119997	5134996	15000	*	1.07999
chr1	5134997	5169996	35000	*	1.28375
chr1	5739997	5754996	15000	*	1.0581
chr1	6629996	6659995	30000	*	1.17466
chr1	7419996	7429995	10000	*	1.06014
chr1	7759995	7774994	15000	*	1.04393
chr1	8409995	8424994	15000	*	1.15203
chr1	8699995	8704994	5000	*	1.13699
chr1	8809995	8814994	5000	*	1.10185
chr1	8894994	8899993	5000	*	1.02434
chr1	8964994	8969993	5000	*	1.08815
chr1	9199994	9219993	20000	*	1.08534
chr1	9264994	9269993	5000	*	1.12423
chr1	9859994	9864993	5000	*	1.31269
chr1	10129993	10134992	5000	*	1.08169
chr1	10149993	10154992	5000	*	1.49164
chr1	10779993	10799992	20000	*	1.27705
chr1	10824993	10839992	15000	*	1.02026
chr1	11139993	11144992	5000	*	1.20449
chr1	11239993	11264992	25000	*	1.12618
chr1	11804992	11809991	5000	*	1.05727
chr1	11809992	11814991	5000	*	1.08671
chr1	12114992	12134991	20000	*	1.26284
chr1	12819991	12824990	5000	*	1.08281
chr1	13489991	13494990	5000	*	1.53738
chr1	13649991	13654990	5000	*	1.11969
chr1	13949990	13959989	10000	*	1.12537
chr1	15709989	15729988	20000	*	1.36809
chr1	16054989	16059988	5000	*	1.17334
chr1	16649988	16654987	5000	*	1.07852
chr1	16989988	17004987	15000	*	1.07748
chr1	17159988	17169987	10000	*	1.02979
chr1	17259988	17269987	10000	*	1.22187
chr1	17769987	17809986	40000	*	1.24592
chr1	18484987	18489986	5000	*	1.09616
chr1	18699987	18709986	10000	*	1.16149
chr1	19274986	19279985	5000	*	1.1062
chr1	19624986	19639985	15000	*	1.06223
chr1	19774986	19784985	10000	*	1.64661
chr1	21559984	21569983	10000	*	1.05799
chr1	21969984	21974983	5000	*	1.24574
chr1	22279984	22289983	10000	*	1.3257
chr1	22509984	22544983	35000	*	1.09215
chr1	22549984	22559983	10000	*	1.08582
chr1	22979983	22984982	5000	*	1.10243
chr1	23079983	23094982	15000	*	1.09101
chr1	23384983	23394982	10000	*	1.21748
chr1	24429982	24444981	15000	*	1.34257
chr1	24459982	24464981	5000	*	1.36722
chr1	24934982	24944981	10000	*	1.22662
chr1	25194982	25199981	5000	*	1.16204
chr1	25444981	25449980	5000	*	1.13151
chr1	28349979	28354978	5000	*	1.01028
chr1	28739979	28754978	15000	*	1.14875
chr1	28914979	28919978	5000	*	1.05718
chr1	30504977	30514976	10000	*	1.01997
chr1	31959976	31964975	5000	*	1.135
chr1	33664975	33674974	10000	*	1.05887
chr1	34869974	34879973	10000	*	1.04241
chr1	35844973	35854972	10000	*	1.05664
chr1	36499973	36504972	5000	*	1.2898
chr1	37029972	37039971	10000	*	1.25691
chr1	37499972	37509971	10000	*	1.12478
chr1	37979971	37989970	10000	*	1.39414
chr1	38764971	38769970	5000	*	1.2311
chr1	38979971	38994970	15000	*	1.13517
chr1	39069971	39079969	9999	*	1.23011
chr1	39294970	39299969	5000	*	1.11655
chr1	39394970	39404969	10000	*	1.17095
chr1	39759970	39764969	5000	*	1.07051
chr1	40744969	40749968	5000	*	1.05383
chr1	42989967	42994966	5000	*	1.03398
chr1	43344967	43349966	5000	*	1.03977
chr1	43789967	43799966	10000	*	1.0369
chr1	43989967	44019966	30000	*	1.02429
chr1	44019967	44024966	5000	*	1.09559
chr1	44109967	44114966	5000	*	1.00624
chr1	45619965	45629964	10000	*	1.00044
chr1	46339965	46344964	5000	*	1.00762
chr1	46534965	46539964	5000	*	1.50057
chr1	47304964	47314963	10000	*	1.25543
chr1	47499964	47509963	10000	*	1.07328
chr1	47654964	47659963	5000	*	1.13676
chr1	48029963	48034962	5000	*	1.11123
chr1	48679963	48714962	35000	*	1.17893
chr1	49139963	49144962	5000	*	1.03519
chr1	49499962	49504961	5000	*	1.03443
chr1	49614962	49624961	10000	*	1.31274
chr1	50469961	50474960	5000	*	1.03948
chr1	50644961	50649960	5000	*	1.02434
chr1	50799961	50809960	10000	*	1.64632
chr1	50864961	50884960	20000	*	1.10138
chr1	50889961	50894960	5000	*	1.00835
chr1	51244961	51249960	5000	*	1.0641
chr1	52164960	52174959	10000	*	1.20691
chr1	52344960	52359959	15000	*	1.00724
chr1	52739960	52744959	5000	*	1.02819
chr1	52819960	52829959	10000	*	1.02074
chr1	53059959	53064958	5000	*	1.0754
chr1	54214958	54219957	5000	*	1.11607
chr1	54369958	54374957	5000	*	1.02445
chr1	56139957	56149956	10000	*	1.01343
chr1	56189957	56194956	5000	*	1.22239
chr1	56754956	56759955	5000	*	1.08076
chr1	57944956	57949955	5000	*	1.23523
chr1	58749955	58754954	5000	*	1.09949
chr1	58799955	58809954	10000	*	1.18048
chr1	59339954	59354953	15000	*	1.02405
chr1	59369954	59379953	10000	*	1.07583
chr1	59404954	59409953	5000	*	1.28668
chr1	60009954	60024953	15000	*	1.00248
chr1	60049954	60054953	5000	*	1.04642
chr1	60059954	60069953	10000	*	1.14264
chr1	60084954	60089953	5000	*	1.63183
chr1	60104954	60114953	10000	*	1.22949
chr1	60194954	60199953	5000	*	1.65616
chr1	60219954	60229953	10000	*	1.2295
chr1	60384954	60419953	35000	*	1.09171
chr1	60524953	60529952	5000	*	1.0152
chr1	60579953	60584952	5000	*	1.29059
chr1	60749953	60764952	15000	*	1.20759
chr1	60839953	60844952	5000	*	1.025
chr1	60949953	60964952	15000	*	1.04642
chr1	61679953	61684952	5000	*	1.12695
chr1	61719953	61729952	10000	*	1.36574
chr1	61744953	61749952	5000	*	1.65616
chr1	61764953	61769952	5000	*	1.29815
chr1	61834952	61844951	10000	*	1.37132
chr1	61849952	61859951	10000	*	1.25471
chr1	61969952	61979951	10000	*	1.17975
chr1	62039952	62044951	5000	*	1.04202
chr1	62084952	62089951	5000	*	1.00641
chr1	62579952	62594951	15000	*	1.16719
chr1	63704951	63719950	15000	*	1.35342
chr1	64014951	64029950	15000	*	1.44889
chr1	64034951	64039950	5000	*	1.06817
chr1	64324950	64339949	15000	*	1.01525
chr1	64414950	64429949	15000	*	1.06129
chr1	64639950	64644949	5000	*	1.12665
chr1	64829950	64834949	5000	*	1.19889
chr1	65334950	65344949	10000	*	1.27344
chr1	65599949	65609948	10000	*	1.11679
chr1	66159949	66174948	15000	*	1.33697
chr1	67864948	67884947	20000	*	1.15566
chr1	68124947	68129946	5000	*	1.04131
chr1	68274947	68289946	15000	*	1.10293
chr1	68954947	68969946	15000	*	1.09559
chr1	68954947	68959946	5000	*	1.32775
chr1	69229947	69239946	10000	*	1.15878
chr1	69959946	69994945	35000	*	1.31068
chr1	71004945	71009944	5000	*	1.19594
chr1	71174945	71179944	5000	*	1.03549
chr1	71254945	71259944	5000	*	1.00055
chr1	72239944	72244943	5000	*	1.33179
chr1	74779942	74784941	5000	*	1.65427
chr1	75124942	75134941	10000	*	1.21525
chr1	76139941	76144940	5000	*	1.13406
chr1	76249941	76259940	10000	*	1.06156
chr1	76309941	76314940	5000	*	1.10202
chr1	76659941	76664940	5000	*	1.30952
chr1	76769941	76779940	10000	*	1.02154
chr1	77044940	77049939	5000	*	1.11606
chr1	77654940	77669939	15000	*	1.15438
chr1	77994940	77999939	5000	*	1.07121
chr1	78299939	78309938	10000	*	1.03738
chr1	78694939	78704938	10000	*	1.09059
chr1	80029938	80034937	5000	*	1.018
chr1	80404938	80409937	5000	*	1.18134
chr1	80869937	80879936	10000	*	1.39066
chr1	81174937	81179936	5000	*	1.14162
chr1	82539936	82544935	5000	*	1.14361
chr1	82559936	82564935	5000	*	1.05972
chr1	82989936	83009935	20000	*	1.00127
chr1	83074936	83079935	5000	*	1.50168
chr1	83289935	83299934	10000	*	1.00663
chr1	83969935	83974934	5000	*	1.28216
chr1	84394935	84404934	10000	*	1.30301
chr1	85629934	85639933	10000	*	1.2035
chr1	85729933	85744932	15000	*	1.07576
chr1	86684933	86694932	10000	*	1.08133
chr1	87489932	87494931	5000	*	1.07333
chr1	87884932	87894931	10000	*	1.30149
chr1	87919932	87929931	10000	*	1.04709
chr1	88044932	88054931	10000	*	1.11879
chr1	88479931	88484930	5000	*	1.38546
chr1	88664931	88684930	20000	*	1.0703
chr1	89084931	89089930	5000	*	1.0375
chr1	89879930	89884929	5000	*	1.02881
chr1	90339930	90344929	5000	*	1.17142
chr1	90664930	90669929	5000	*	1.18182
chr1	90884929	90889928	5000	*	1.10987
chr1	91259929	91274928	15000	*	1.18287
chr1	93159928	93174927	15000	*	1.01066
chr1	93354927	93384926	30000	*	1.20459
chr1	94309927	94334926	25000	*	1.16147
chr1	95509926	95514925	5000	*	1.0152
chr1	96114925	96129924	15000	*	1.14439
chr1	96524925	96529924	5000	*	1.05524
chr1	97404924	97414923	10000	*	1.01591
chr1	97534924	97539923	5000	*	1.19765
chr1	97629924	97644923	15000	*	1.14466
chr1	97719924	97724923	5000	*	1.01312
chr1	98024924	98029923	5000	*	1.11869
chr1	98174924	98179923	5000	*	1.2392
chr1	98314924	98319923	5000	*	1.23525
chr1	98404923	98414922	10000	*	1.35385
chr1	98534923	98539922	5000	*	1.17983
chr1	98569923	98574922	5000	*	1.0412
chr1	98969923	98974922	5000	*	1.01622
chr1	99314923	99319922	5000	*	1.12193
chr1	99769922	99794921	25000	*	1.49472
chr1	100559922	100579921	20000	*	1.14947
chr1	103299920	103304919	5000	*	1.18945
chr1	103819919	103824918	5000	*	1.11548
chr1	103859919	103864918	5000	*	1.21842
chr1	104054919	104064918	10000	*	1.1148
chr1	104669918	104684917	15000	*	1.09982
chr1	105914917	105919916	5000	*	1.04494
chr1	106464917	106469916	5000	*	1.17261
chr1	107084917	107089916	5000	*	1.33815
chr1	107514916	107519915	5000	*	1.3371
chr1	107874916	107894915	20000	*	1.5263
chr1	108909915	108914914	5000	*	1.05909
chr1	109024915	109034914	10000	*	1.18948
chr1	109514915	109574914	60000	*	1.00443
chr1	109969914	109984913	15000	*	1.06046
chr1	109989914	109994913	5000	*	1.52746
chr1	110034914	110074913	40000	*	1.00783
chr1	110079914	110094913	15000	*	1.38618
chr1	110449914	110459913	10000	*	1.05453
chr1	110559914	110564913	5000	*	1.10414
chr1	110664914	110669913	5000	*	1.12478
chr1	110769914	110784913	15000	*	1.07771
chr1	111149913	111154912	5000	*	1.3519
chr1	111294913	111299912	5000	*	1.06252
chr1	111659913	111664912	5000	*	1.69666
chr1	111824913	111834912	10000	*	1.34665
chr1	111909913	111914912	5000	*	1.02533
chr1	112059913	112064912	5000	*	1.18906
chr1	112114913	112124912	10000	*	1.03812
chr1	112294912	112299911	5000	*	1.37421
chr1	112469912	112474911	5000	*	1.59543
chr1	112629912	112639911	10000	*	1.20423
chr1	113269912	113274911	5000	*	1.19335
chr1	113329912	113334911	5000	*	1.05969
chr1	113519911	113539910	20000	*	1.04388
chr1	113669911	113674910	5000	*	1.12635
chr1	114024911	114029910	5000	*	1.03053
chr1	114524911	114529910	5000	*	1.27733
chr1	114619911	114624910	5000	*	1.11718
chr1	117289908	117294907	5000	*	1.16291
chr1	117359908	117369907	10000	*	1.20859
chr1	117734908	117744907	10000	*	1.16528
chr1	118024908	118029907	5000	*	1.0277
chr1	118529907	118534906	5000	*	1.51604
chr1	118589907	118599906	10000	*	1.34757
chr1	118654907	118669906	15000	*	1.30174
chr1	119249907	119254906	5000	*	1.13432
chr1	119394907	119399906	5000	*	1.01522
chr1	119514907	119519906	5000	*	1.65096
chr1	120119906	120124905	5000	*	1.06634
chr1	120139906	120144905	5000	*	1.10999
chr1	120949906	120964905	15000	*	1.03449
chr1	125004902	125014901	10000	*	1.57517
chr1	143669888	143684887	15000	*	1.1375
chr1	143889887	143894886	5000	*	1.0395
chr1	145694886	145699885	5000	*	1.0514
chr1	147044885	147049884	5000	*	1.05788
chr1	147234885	147239884	5000	*	1.17539
chr1	147549884	147559883	10000	*	1.24062
chr1	147599884	147604883	5000	*	1.00868
chr1	147844884	147849883	5000	*	1.02684
chr1	149124883	149129882	5000	*	1.04405
chr1	150214882	150224881	10000	*	1.36862
chr1	150274882	150279881	5000	*	1.05772
chr1	150864882	150874881	10000	*	1.23024
chr1	151494881	151499880	5000	*	1.06742
chr1	151739881	151744880	5000	*	1.41056
chr1	152524881	152534880	10000	*	1.15305
chr1	152544880	152549879	5000	*	1.28523
chr1	153999879	154004878	5000	*	1.14042
chr1	154124879	154129878	5000	*	1.6706
chr1	157214877	157229876	15000	*	1.00084
chr1	157594876	157599875	5000	*	1.04867
chr1	158769876	158779875	10000	*	1.04229
chr1	158879875	158884874	5000	*	1.01102
chr1	160649874	160654873	5000	*	1.00247
chr1	163704872	163719871	15000	*	1.03108
chr1	164094871	164104870	10000	*	1.24372
chr1	164769871	164779870	10000	*	1.34758
chr1	165134871	165154869	19999	*	1.42995
chr1	165329870	165334869	5000	*	1.28352
chr1	165399870	165409869	10000	*	1.01855
chr1	165689870	165709869	20000	*	1.20964
chr1	166639869	166644868	5000	*	1.22554
chr1	167654869	167674867	19999	*	1.40734
chr1	168029868	168039867	10000	*	1.20446
chr1	168269868	168274867	5000	*	1.05097
chr1	168559868	168564867	5000	*	1.02143
chr1	170454866	170459865	5000	*	1.33695
chr1	171504865	171509864	5000	*	1.29767
chr1	171799865	171814864	15000	*	1.11815
chr1	172069865	172084864	15000	*	1.0784
chr1	172169865	172174864	5000	*	1.44251
chr1	172394865	172404864	10000	*	1.04119
chr1	172539865	172544864	5000	*	1.06898
chr1	172719864	172724863	5000	*	1.17971
chr1	172814864	172824863	10000	*	1.21049
chr1	173004864	173009863	5000	*	1.12463
chr1	174014863	174019862	5000	*	1.07892
chr1	174274863	174284862	10000	*	1.43699
chr1	174409863	174424862	15000	*	1.02277
chr1	174549863	174579862	30000	*	1.48997
chr1	174714863	174724862	10000	*	1.15482
chr1	174754863	174759862	5000	*	1.13948
chr1	175079863	175084862	5000	*	1.06177
chr1	175109863	175114862	5000	*	1.92305
chr1	175879862	175889861	10000	*	1.34169
chr1	176289862	176294861	5000	*	1.05932
chr1	176614861	176619860	5000	*	1.09758
chr1	176804861	176809860	5000	*	1.09095
chr1	177649861	177669860	20000	*	1.09999
chr1	177839860	177864859	25000	*	1.1394
chr1	178139860	178144859	5000	*	1.15194
chr1	178474860	178509859	35000	*	1.05031
chr1	178539860	178544859	5000	*	1.63626
chr1	178794860	178809859	15000	*	1.20992
chr1	178959860	178964859	5000	*	1.21994
chr1	178979860	178989859	10000	*	1.01817
chr1	179004860	179034858	29999	*	1.47643
chr1	179074859	179089858	15000	*	1.09596
chr1	179409859	179414858	5000	*	1.07294
chr1	179524859	179529858	5000	*	1.14916
chr1	179574859	179579858	5000	*	1.16858
chr1	179719859	179724858	5000	*	1.07427
chr1	179854859	179859858	5000	*	1.65616
chr1	180054859	180074858	20000	*	1.38616
chr1	180079859	180089858	10000	*	1.22328
chr1	180159859	180169858	10000	*	1.04102
chr1	180249859	180259858	10000	*	1.30783
chr1	180254859	180299857	44999	*	1.8835
chr1	180269859	180289857	19999	*	1.10309
chr1	180349858	180359857	10000	*	1.13858
chr1	180359858	180369857	10000	*	1.1905
chr1	180464858	180469857	5000	*	1.03392
chr1	180669858	180674857	5000	*	1.00625
chr1	180959858	180974857	15000	*	1.02563
chr1	181099858	181104857	5000	*	1.15293
chr1	181249858	181259857	10000	*	1.18823
chr1	181359858	181364857	5000	*	1.30775
chr1	181409858	181419857	10000	*	1.01165
chr1	181494858	181509857	15000	*	1.10211
chr1	181739857	181744856	5000	*	1.26646
chr1	181854857	181864856	10000	*	1.3562
chr1	181914857	181924856	10000	*	1.11738
chr1	181984857	181989856	5000	*	1.09872
chr1	182229857	182234856	5000	*	1.01917
chr1	182534857	182539856	5000	*	1.04194
chr1	182559857	182564856	5000	*	1.16664
chr1	183179856	183189855	10000	*	1.36782
chr1	183529856	183564855	35000	*	1.08348
chr1	184009856	184034855	25000	*	1.25293
chr1	184019856	184024855	5000	*	1.20694
chr1	185239855	185249854	10000	*	1.03481
chr1	186144854	186154853	10000	*	1.01232
chr1	186594853	186604852	10000	*	1.18312
chr1	187634853	187639852	5000	*	1.11236
chr1	187674853	187679852	5000	*	1.24274
chr1	187739853	187744852	5000	*	1.35959
chr1	187919852	187929851	10000	*	1.04156
chr1	188009852	188014851	5000	*	1.06225
chr1	188374852	188379851	5000	*	1.18895
chr1	189199851	189214850	15000	*	1.23613
chr1	189264851	189274850	10000	*	1.11509
chr1	189859851	189864850	5000	*	1.10057
chr1	189884851	189889850	5000	*	1.09021
chr1	190019851	190024850	5000	*	1.00917
chr1	190134851	190139850	5000	*	1.07535
chr1	190394850	190404849	10000	*	1.2408
chr1	190504850	190509849	5000	*	1.29902
chr1	191024850	191034849	10000	*	1.60164
chr1	191149850	191154849	5000	*	1.06369
chr1	191189850	191194849	5000	*	1.29241
chr1	192039849	192059848	20000	*	1.02106
chr1	192089849	192094848	5000	*	1.20845
chr1	192369849	192379848	10000	*	1.09891
chr1	192864849	192879847	14999	*	1.07868
chr1	193384848	193389847	5000	*	1.20436
chr1	193649848	193654847	5000	*	1.2644
chr1	195159847	195164846	5000	*	1.34548
chr1	195404846	195414845	10000	*	1.02259
chr1	195639846	195649845	10000	*	1.28093
chr1	195934846	195944845	10000	*	1.06081
chr1	196154846	196169845	15000	*	1.26946
chr1	196319846	196324845	5000	*	1.19185
chr1	196559846	196569845	10000	*	1.17293
chr1	197284845	197294844	10000	*	1.08064
chr1	197849845	197864844	15000	*	1.11358
chr1	197989844	197999843	10000	*	1.65616
chr1	198049844	198054843	5000	*	1.22063
chr1	198349844	198359843	10000	*	1.30047
chr1	198639844	198644843	5000	*	1.09376
chr1	199074844	199089843	15000	*	1.13891
chr1	199079844	199084843	5000	*	1.148
chr1	199194843	199214842	20000	*	1.23484
chr1	199214843	199219842	5000	*	1.1284
chr1	199314843	199324842	10000	*	1.1188
chr1	199609843	199614842	5000	*	1.44271
chr1	199704843	199724842	20000	*	1.34125
chr1	199899843	199904842	5000	*	1.20323
chr1	200144843	200154842	10000	*	1.3054
chr1	200194843	200204842	10000	*	1.02475
chr1	200519842	200524841	5000	*	1.02259
chr1	201184842	201189841	5000	*	1.10621
chr1	201194842	201204841	10000	*	1.39762
chr1	201219842	201234841	15000	*	1.26818
chr1	201859841	201864840	5000	*	1.11481
chr1	202359841	202364840	5000	*	1.0384
chr1	202569841	202579840	10000	*	1.01978
chr1	203039840	203044839	5000	*	1.10717
chr1	203154840	203164839	10000	*	1.15423
chr1	203264840	203269839	5000	*	1.299
chr1	203769840	203774839	5000	*	1.26899
chr1	204139840	204159839	20000	*	1.02754
chr1	204189840	204204839	15000	*	1.07719
chr1	204709839	204734838	25000	*	1.1727
chr1	205904838	205914837	10000	*	1.06667
chr1	205924838	205929837	5000	*	1.47994
chr1	206459838	206464837	5000	*	1.09288
chr1	206879837	206884836	5000	*	1.12675
chr1	207184837	207199836	15000	*	1.70469
chr1	207394837	207404836	10000	*	1.03865
chr1	207864837	207894836	30000	*	1.05552
chr1	207969837	207984836	15000	*	1.15565
chr1	208264836	208269835	5000	*	1.13095
chr1	208439836	208464835	25000	*	1.25512
chr1	208479836	208504835	25000	*	1.02277
chr1	208529836	208534835	5000	*	1.07727
chr1	208549836	208564835	15000	*	1.09409
chr1	208644836	208649835	5000	*	1.04493
chr1	209174836	209184835	10000	*	1.06123
chr1	209469835	209474834	5000	*	1.01502
chr1	209479835	209484834	5000	*	1.04071
chr1	209854835	209864834	10000	*	1.02202
chr1	210024835	210029834	5000	*	1.25302
chr1	210164835	210174834	10000	*	1.18894
chr1	210199835	210214834	15000	*	1.2651
chr1	210444835	210454834	10000	*	1.10275
chr1	210879834	210884833	5000	*	1.17415
chr1	211029834	211034833	5000	*	1.08401
chr1	211044834	211064833	20000	*	1.08113
chr1	211934833	211939832	5000	*	1.0657
chr1	213094832	213119831	25000	*	1.08418
chr1	213094832	213099831	5000	*	1.14624
chr1	213139832	213144831	5000	*	1.07197
chr1	213174832	213184831	10000	*	1.07972
chr1	213379832	213384831	5000	*	1.01516
chr1	213534832	213544831	10000	*	1.15953
chr1	213899832	213904831	5000	*	1.22625
chr1	214784831	214794830	10000	*	1.16796
chr1	215284831	215299830	15000	*	1.07287
chr1	215564831	215579829	14999	*	1.00967
chr1	215739830	215749829	10000	*	1.01568
chr1	215779830	215784829	5000	*	1.01678
chr1	216074830	216084829	10000	*	1.26451
chr1	216799830	216804829	5000	*	1.38422
chr1	216954829	216964828	10000	*	1.03733
chr1	217144829	217159828	15000	*	1.09522
chr1	217259829	217269828	10000	*	1.76101
chr1	218734828	218739827	5000	*	1.0454
chr1	220169827	220179826	10000	*	1.05664
chr1	220299827	220304826	5000	*	1.04058
chr1	220674826	220704825	30000	*	1.11229
chr1	220759826	220779825	20000	*	1.02803
chr1	220819826	220829825	10000	*	1.66538
chr1	220894826	220899825	5000	*	1.12119
chr1	220924826	220929825	5000	*	1.13231
chr1	221269826	221274825	5000	*	1.06709
chr1	221849826	221864825	15000	*	1.04724
chr1	222814825	222819824	5000	*	1.28941
chr1	223169824	223179823	10000	*	1.12009
chr1	223504824	223529823	25000	*	1.03419
chr1	223664824	223684823	20000	*	1.03413
chr1	223724824	223744823	20000	*	1.32116
chr1	224229824	224244823	15000	*	1.0166
chr1	224289824	224294823	5000	*	1.04387
chr1	225029823	225039822	10000	*	1.14934
chr1	225769822	225774821	5000	*	1.01568
chr1	225894822	225904821	10000	*	1.26857
chr1	225909822	225914821	5000	*	1.08152
chr1	226579822	226584821	5000	*	1.87286
chr1	226734822	226744821	10000	*	1.0308
chr1	227734821	227749820	15000	*	1.00978
chr1	228129821	228134820	5000	*	1.25435
chr1	228909820	228914819	5000	*	1.16583
chr1	228949820	228964819	15000	*	1.00988
chr1	229124820	229129819	5000	*	1.11066
chr1	229194820	229204819	10000	*	1.22751
chr1	229214820	229219819	5000	*	1.16291
chr1	229294820	229299819	5000	*	1.11384
chr1	229559819	229564818	5000	*	1.06075
chr1	230144819	230159818	15000	*	1.51092
chr1	231164818	231169817	5000	*	1.0968
chr1	231184818	231189817	5000	*	1.27012
chr1	232074817	232079816	5000	*	1.19674
chr1	232214817	232224816	10000	*	1.17709
chr1	232789817	232799816	10000	*	1.06669
chr1	233159817	233164816	5000	*	1.30971
chr1	233369816	233374815	5000	*	1.10123
chr1	234254816	234259815	5000	*	1.24995
chr1	234589815	234644814	55000	*	1.03377
chr1	235119815	235124814	5000	*	1.14655
chr1	236639814	236644813	5000	*	1.10151
chr1	236754814	236769813	15000	*	1.12923
chr1	236779814	236784813	5000	*	1.27312
chr1	236999814	237019812	19999	*	1.10385
chr1	237204813	237209812	5000	*	1.10487
chr1	237759813	237764812	5000	*	1.77366
chr1	238789812	238799811	10000	*	1.15708
chr1	238884812	238889811	5000	*	1.04388
chr1	238894812	238899811	5000	*	1.16294
chr1	239554811	239559810	5000	*	1.19017
chr1	239564811	239569810	5000	*	1.11074
chr1	240154811	240159810	5000	*	1.15234
chr1	241429810	241434809	5000	*	1.0456
chr1	242939809	242944808	5000	*	1.05205
chr1	242949809	242959808	10000	*	1.7902
chr1	244154808	244159807	5000	*	1.21021
chr1	245039807	245044806	5000	*	1.01959
chr1	245464807	245474806	10000	*	1.01638
chr1	246459806	246464805	5000	*	1.10722
chr1	246469806	246474805	5000	*	1.06897
chr1	246654806	246664805	10000	*	1.38793
chr1	246834806	246839805	5000	*	1.01102
chr1	246839806	246869805	30000	*	1.03896
chr1	246994806	247009805	15000	*	1.1076
chr1	247014806	247019805	5000	*	1.28597
chr1	247639805	247644804	5000	*	1.28373
chr1	247959805	247974804	15000	*	1.58215
chr1	247964805	247989804	25000	*	1.18175
chr1	248049805	248059804	10000	*	1.04087
chr1	248079805	248089804	10000	*	1.04949
chr1	248684804	248709803	25000	*	1.23335
chr1	248749804	248764803	15000	*	1.43193
chr1	248789804	248794803	5000	*	1.12894
chr2	78382	83381	5000	*	1.00216
chr2	233382	238381	5000	*	1.01911
chr2	373382	378381	5000	*	1.0146
chr2	538382	543381	5000	*	1.0236
chr2	1173381	1183380	10000	*	1.11349
chr2	1308381	1313380	5000	*	1.45494
chr2	1338381	1343380	5000	*	1.32172
chr2	1453381	1458380	5000	*	1.05379
chr2	1743381	1748380	5000	*	1.19022
chr2	1923380	1928379	5000	*	1.05209
chr2	2133380	2143379	10000	*	1.187
chr2	2353380	2358379	5000	*	1.34732
chr2	2508380	2513379	5000	*	1.26164
chr2	2648380	2653379	5000	*	1.15349
chr2	2693380	2708379	15000	*	1.89575
chr2	2953380	2968379	15000	*	1.25449
chr2	3083380	3088379	5000	*	1.4101
chr2	3143380	3148379	5000	*	1.05847
chr2	3263379	3273378	10000	*	1.03261
chr2	3503379	3508378	5000	*	1.16872
chr2	3573379	3578378	5000	*	1.5355
chr2	3623379	3628378	5000	*	1.01664
chr2	3673379	3678378	5000	*	1.61673
chr2	3888379	3893378	5000	*	1.01303
chr2	3988379	3998378	10000	*	1.29561
chr2	4268379	4283378	15000	*	1.01588
chr2	4358379	4368378	10000	*	1.70406
chr2	4458378	4483377	25000	*	1.07811
chr2	4728378	4733377	5000	*	1.18259
chr2	4808378	4823377	15000	*	1.05958
chr2	5083378	5098377	15000	*	1.21021
chr2	6188377	6198376	10000	*	1.41207
chr2	6443377	6453376	10000	*	1.15992
chr2	8228375	8243374	15000	*	1.10597
chr2	8338375	8353374	15000	*	1.06611
chr2	9028375	9033374	5000	*	1.2105
chr2	9158375	9163374	5000	*	1.25293
chr2	9418375	9423374	5000	*	1.06028
chr2	9573374	9578373	5000	*	1.44301
chr2	9673374	9693373	20000	*	1.20349
chr2	10073374	10078373	5000	*	1.23953
chr2	10628374	10638373	10000	*	1.02319
chr2	10708374	10753372	44999	*	1.12313
chr2	10868373	10873372	5000	*	1.07846
chr2	11448373	11458372	10000	*	1.05299
chr2	11603373	11623372	20000	*	1.0316
chr2	11938373	11953372	15000	*	1.28243
chr2	12878372	12898371	20000	*	1.20073
chr2	13728371	13733370	5000	*	1.4197
chr2	14843370	14848369	5000	*	1.02206
chr2	15598370	15608369	10000	*	1.13314
chr2	15608370	15613369	5000	*	1.16785
chr2	15668370	15673369	5000	*	1.01508
chr2	15853369	15858368	5000	*	1.02774
chr2	16208369	16223368	15000	*	1.0284
chr2	16438369	16443368	5000	*	1.14381
chr2	16468369	16473368	5000	*	1.20808
chr2	17538368	17543367	5000	*	1.00055
chr2	17848368	17858367	10000	*	1.35497
chr2	18433367	18438366	5000	*	1.01937
chr2	18488367	18513366	25000	*	1.2927
chr2	19118367	19128366	10000	*	1.13406
chr2	19793366	19803365	10000	*	1.20195
chr2	19993366	20003365	10000	*	1.07469
chr2	20723366	20728365	5000	*	1.05508
chr2	21778365	21788364	10000	*	1.03712
chr2	21998365	22003364	5000	*	1.13737
chr2	22628364	22638363	10000	*	1.16342
chr2	23043364	23048363	5000	*	1.01519
chr2	24558363	24563362	5000	*	1.26041
chr2	25253362	25258361	5000	*	1.13233
chr2	25638362	25643361	5000	*	1.00807
chr2	26088361	26098360	10000	*	1.12616
chr2	26098361	26103360	5000	*	1.3211
chr2	26988361	26998360	10000	*	1.71091
chr2	28018360	28023359	5000	*	1.10445
chr2	28558359	28573358	15000	*	1.17471
chr2	29118359	29128358	10000	*	1.1389
chr2	29633359	29638358	5000	*	1.01838
chr2	29883358	29888357	5000	*	1.24565
chr2	29928358	29933357	5000	*	1.10858
chr2	29948358	29963357	15000	*	1.13692
chr2	30763358	30773357	10000	*	1.00406
chr2	31063357	31068356	5000	*	1.11066
chr2	31273357	31283356	10000	*	1.10242
chr2	31838357	31843356	5000	*	1.08956
chr2	32228356	32233355	5000	*	1.20707
chr2	33708355	33713354	5000	*	1.00405
chr2	34023355	34038354	15000	*	1.20512
chr2	34468355	34473354	5000	*	1.05601
chr2	34648355	34653354	5000	*	1.58672
chr2	35138354	35143353	5000	*	1.30553
chr2	35198354	35208353	10000	*	1.21587
chr2	36548353	36553352	5000	*	1.18757
chr2	37358352	37363351	5000	*	1.1089
chr2	37833352	37848351	15000	*	1.22742
chr2	38803351	38808350	5000	*	1.59387
chr2	38948351	38958350	10000	*	1.15022
chr2	39848350	39873349	25000	*	1.04275
chr2	40563350	40568349	5000	*	1.41691
chr2	40688350	40693349	5000	*	1.0504
chr2	40798350	40808349	10000	*	1.10666
chr2	41108349	41113348	5000	*	1.04561
chr2	41288349	41298348	10000	*	1.39377
chr2	41703349	41708348	5000	*	1.08357
chr2	41808349	41813348	5000	*	1.05734
chr2	42328348	42338347	10000	*	1.13776
chr2	42458348	42463347	5000	*	1.06326
chr2	42913348	42923347	10000	*	1.07667
chr2	43203348	43208347	5000	*	1.02434
chr2	43493348	43518346	24999	*	1.16925
chr2	43988347	44023346	35000	*	1.00325
chr2	44498347	44503346	5000	*	1.0904
chr2	44963346	44968345	5000	*	1.33077
chr2	45198346	45208345	10000	*	1.03204
chr2	45438346	45458345	20000	*	1.1776
chr2	45633346	45638345	5000	*	1.01786
chr2	45878346	45888345	10000	*	1.33602
chr2	46513345	46518344	5000	*	1.17351
chr2	46683345	46688344	5000	*	1.04571
chr2	46773345	46783344	10000	*	1.0749
chr2	47083345	47098344	15000	*	1.2311
chr2	49478343	49488342	10000	*	1.54605
chr2	49808343	49853341	44999	*	1.07315
chr2	50168342	50183341	15000	*	1.19196
chr2	50573342	50583341	10000	*	1.06655
chr2	50683342	50688341	5000	*	1.8835
chr2	50723342	50728341	5000	*	1.1939
chr2	50773342	50783341	10000	*	1.28763
chr2	51268341	51273340	5000	*	1.12795
chr2	52593340	52598339	5000	*	1.11952
chr2	53258340	53263339	5000	*	1.15717
chr2	53508340	53528339	20000	*	1.00381
chr2	54373339	54378338	5000	*	1.42738
chr2	54633339	54648338	15000	*	2.03664
chr2	56288337	56303336	15000	*	1.11232
chr2	57243337	57248336	5000	*	1.50591
chr2	59028335	59033334	5000	*	1.31344
chr2	59393335	59403334	10000	*	1.10846
chr2	60668334	60688333	20000	*	1.00136
chr2	61403333	61408332	5000	*	1.05942
chr2	61413333	61418332	5000	*	1.05799
chr2	61763333	61778332	15000	*	1.05957
chr2	62543332	62553331	10000	*	1.00735
chr2	63678332	63688330	9999	*	1.18029
chr2	64698331	64703330	5000	*	1.32219
chr2	65203330	65208329	5000	*	1.02044
chr2	65568330	65578329	10000	*	1.2104
chr2	65803330	65808329	5000	*	1.02999
chr2	66443329	66448328	5000	*	1.07436
chr2	66543329	66548328	5000	*	1.0397
chr2	66808329	66818328	10000	*	1.99797
chr2	67753328	67758327	5000	*	1.11214
chr2	68148328	68158327	10000	*	1.26879
chr2	68408328	68413327	5000	*	1.27913
chr2	68658328	68663327	5000	*	1.09675
chr2	68768327	68773326	5000	*	1.05875
chr2	69143327	69148326	5000	*	1.19743
chr2	69763327	69768326	5000	*	1.05108
chr2	69923327	69958326	35000	*	1.01175
chr2	70053326	70058325	5000	*	1.0353
chr2	70248326	70253325	5000	*	1.04793
chr2	70653326	70673325	20000	*	1.16119
chr2	71258325	71263324	5000	*	1.50776
chr2	71273325	71283324	10000	*	1.16393
chr2	71838325	71843324	5000	*	1.27434
chr2	72243325	72248324	5000	*	1.28255
chr2	72263325	72273324	10000	*	1.09911
chr2	73493324	73503323	10000	*	1.14187
chr2	75708322	75723321	15000	*	1.09795
chr2	75828322	75843321	15000	*	1.07038
chr2	76483321	76488320	5000	*	1.01251
chr2	76578321	76583320	5000	*	1.04829
chr2	76943321	76948320	5000	*	1.04203
chr2	77278321	77288320	10000	*	1.09188
chr2	77978320	77983319	5000	*	1.0002
chr2	78778320	78793319	15000	*	1.08237
chr2	79233319	79238318	5000	*	1.52096
chr2	79268319	79273318	5000	*	1.04169
chr2	79523319	79528318	5000	*	1.04519
chr2	79638319	79643318	5000	*	1.01844
chr2	80273318	80278317	5000	*	1.09081
chr2	81138318	81143317	5000	*	1.42621
chr2	81278318	81283317	5000	*	1.09982
chr2	81688317	81693316	5000	*	1.07271
chr2	81713317	81723316	10000	*	1.08798
chr2	82203317	82208316	5000	*	1.05246
chr2	82348317	82353316	5000	*	1.09712
chr2	82618316	82633315	15000	*	1.09578
chr2	83613316	83618315	5000	*	1.21195
chr2	84273315	84288314	15000	*	1.29904
chr2	84738315	84753314	15000	*	1.39499
chr2	85623314	85633313	10000	*	1.50596
chr2	86163314	86178313	15000	*	1.04201
chr2	86183314	86188313	5000	*	1.25956
chr2	86268314	86273313	5000	*	1.05017
chr2	86283314	86288313	5000	*	1.24337
chr2	86473313	86478312	5000	*	1.12714
chr2	86798313	86808312	10000	*	1.03016
chr2	87338313	87343312	5000	*	1.08125
chr2	88273312	88283311	10000	*	1.19649
chr2	88398312	88403311	5000	*	1.04184
chr2	89088311	89103310	15000	*	1.04759
chr2	89783311	89793310	10000	*	1.16198
chr2	90068311	90083310	15000	*	1.3198
chr2	91843309	91848308	5000	*	1.31096
chr2	95013307	95018306	5000	*	1.09036
chr2	95288306	95303305	15000	*	1.05207
chr2	95738306	95743305	5000	*	1.00611
chr2	96163306	96173305	10000	*	1.15074
chr2	97078305	97083304	5000	*	1.35447
chr2	97348305	97353304	5000	*	1.01261
chr2	97733304	97738303	5000	*	1.03869
chr2	98083304	98103303	20000	*	1.11901
chr2	98883304	98888303	5000	*	1.19845
chr2	99163303	99168302	5000	*	1.35997
chr2	99193303	99198302	5000	*	1.07377
chr2	99373303	99378302	5000	*	1.44105
chr2	100483302	100488301	5000	*	1.15536
chr2	100493302	100498301	5000	*	1.15095
chr2	100728302	100738301	10000	*	1.19281
chr2	101533301	101538300	5000	*	1.21731
chr2	101738301	101743300	5000	*	1.14103
chr2	101803301	101818300	15000	*	1.09968
chr2	101863301	101873300	10000	*	1.01747
chr2	102463301	102473300	10000	*	1.13773
chr2	103173300	103178299	5000	*	1.05712
chr2	103908300	103918299	10000	*	1.23011
chr2	104933299	104948298	15000	*	1.39836
chr2	105023299	105033298	10000	*	1.15477
chr2	105533298	105543297	10000	*	1.26528
chr2	105568298	105573297	5000	*	1.08599
chr2	105663298	105688297	25000	*	1.28413
chr2	105958298	105963297	5000	*	1.27755
chr2	106108298	106128297	20000	*	1.08022
chr2	106928297	106938296	10000	*	1.05529
chr2	107248297	107253296	5000	*	1.43831
chr2	107948296	107958295	10000	*	1.00435
chr2	108003296	108008295	5000	*	1.08845
chr2	108028296	108033295	5000	*	1.02227
chr2	108118296	108138295	20000	*	1.15063
chr2	108143296	108148295	5000	*	1.15019
chr2	108168296	108178295	10000	*	1.21385
chr2	108198296	108203295	5000	*	1.44512
chr2	108343296	108363295	20000	*	1.21637
chr2	108668296	108693295	25000	*	1.37587
chr2	108958296	108968295	10000	*	1.09338
chr2	108983296	108988295	5000	*	1.21918
chr2	109038296	109043295	5000	*	1.00032
chr2	109188295	109193294	5000	*	1.38065
chr2	109338295	109343294	5000	*	1.48035
chr2	109348295	109353294	5000	*	1.21175
chr2	109368295	109373294	5000	*	1.05474
chr2	109383295	109398294	15000	*	1.01569
chr2	109388295	109398294	10000	*	1.19485
chr2	110768294	110778293	10000	*	1.0286
chr2	111358294	111363293	5000	*	1.07646
chr2	111943293	111963292	20000	*	1.15973
chr2	111968293	111973292	5000	*	1.23348
chr2	112828293	112833292	5000	*	1.03107
chr2	112888292	112898291	10000	*	1.54435
chr2	112953292	112963291	10000	*	1.14111
chr2	113158292	113163291	5000	*	1.4142
chr2	113333292	113343291	10000	*	1.37749
chr2	114078292	114088291	10000	*	1.03182
chr2	114838291	114843290	5000	*	1.16111
chr2	115138291	115148290	10000	*	1.72685
chr2	115708290	115713289	5000	*	1.04459
chr2	116208290	116213289	5000	*	1.16295
chr2	117328289	117333288	5000	*	1.13175
chr2	117758289	117763288	5000	*	1.11066
chr2	118033288	118038287	5000	*	1.11148
chr2	118048288	118053287	5000	*	1.08213
chr2	118103288	118118287	15000	*	1.09856
chr2	118428288	118443287	15000	*	1.03601
chr2	118718288	118723287	5000	*	1.48494
chr2	119248287	119258286	10000	*	1.41166
chr2	119893287	119898286	5000	*	1.38056
chr2	120038287	120048286	10000	*	1.25952
chr2	120618286	120633285	15000	*	1.15419
chr2	121003286	121008285	5000	*	1.1039
chr2	121543286	121548285	5000	*	1.19775
chr2	121638286	121643285	5000	*	1.2772
chr2	122068285	122078284	10000	*	1.07323
chr2	123563284	123593283	30000	*	1.18357
chr2	123713284	123718283	5000	*	1.03992
chr2	124048284	124053283	5000	*	1.47006
chr2	124053284	124058283	5000	*	1.5165
chr2	124258283	124263282	5000	*	1.05661
chr2	124393283	124398282	5000	*	1.00897
chr2	124693283	124703282	10000	*	1.20402
chr2	124718283	124728282	10000	*	1.00857
chr2	125993282	126003281	10000	*	1.64094
chr2	126273282	126303281	30000	*	1.10376
chr2	126468282	126473281	5000	*	1.17184
chr2	126493282	126498281	5000	*	1.10921
chr2	127013281	127018280	5000	*	1.09795
chr2	127748281	127753280	5000	*	1.17153
chr2	127923281	127933280	10000	*	1.24759
chr2	128043280	128048279	5000	*	1.26845
chr2	128138280	128148279	10000	*	1.25186
chr2	128258280	128263279	5000	*	1.09712
chr2	128478280	128483279	5000	*	1.12921
chr2	128963280	128968279	5000	*	1.10569
chr2	129388279	129398278	10000	*	1.14219
chr2	130818278	130828277	10000	*	1.59108
chr2	130863278	130878277	15000	*	1.06585
chr2	131123278	131128277	5000	*	1.16462
chr2	131458278	131468277	10000	*	1.1528
chr2	132303277	132313276	10000	*	1.10846
chr2	132513277	132543276	30000	*	1.03975
chr2	132938277	132943276	5000	*	1.15422
chr2	133088276	133093275	5000	*	1.08647
chr2	133173276	133178275	5000	*	1.05284
chr2	133253276	133258275	5000	*	1.12293
chr2	133553276	133558275	5000	*	1.30783
chr2	133578276	133598275	20000	*	1.30553
chr2	133608276	133613275	5000	*	1.11707
chr2	133623276	133643275	20000	*	1.3906
chr2	133808276	133813275	5000	*	1.01628
chr2	133863276	133868275	5000	*	1.18528
chr2	133893276	133898275	5000	*	1.47839
chr2	133978276	133983275	5000	*	1.01302
chr2	134103276	134108275	5000	*	1.09902
chr2	134388275	134393274	5000	*	1.32143
chr2	134548275	134553274	5000	*	1.3998
chr2	134868275	134873274	5000	*	1.05589
chr2	134903275	134928274	25000	*	1.14911
chr2	135648274	135653273	5000	*	1.55869
chr2	135838274	135853273	15000	*	1.13825
chr2	135858274	135878273	20000	*	1.39685
chr2	135888274	135908273	20000	*	1.21448
chr2	135983274	135993273	10000	*	1.0604
chr2	136583274	136593273	10000	*	1.24902
chr2	136983273	136988272	5000	*	1.00442
chr2	137298273	137308272	10000	*	1.35328
chr2	137483273	137488272	5000	*	1.09096
chr2	137758273	137763272	5000	*	1.23556
chr2	138123272	138133271	10000	*	1.10538
chr2	138178272	138188271	10000	*	1.23461
chr2	138583272	138593271	10000	*	1.13551
chr2	139898271	139908270	10000	*	1.03735
chr2	140513271	140518270	5000	*	1.32765
chr2	140588270	140598269	10000	*	1.20032
chr2	141143270	141148269	5000	*	1.22071
chr2	141173270	141188269	15000	*	1.00225
chr2	141623270	141628269	5000	*	1.09289
chr2	141873269	141883268	10000	*	1.02179
chr2	142208269	142233268	25000	*	1.19502
chr2	143378268	143393267	15000	*	1.23741
chr2	143718268	143723267	5000	*	1.37059
chr2	144183268	144188267	5000	*	1.13771
chr2	144433267	144438266	5000	*	1.25518
chr2	144828267	144833266	5000	*	1.21291
chr2	145663266	145673265	10000	*	1.11378
chr2	146313266	146318265	5000	*	1.20081
chr2	146768266	146773265	5000	*	1.50502
chr2	147623265	147628264	5000	*	1.11341
chr2	147758265	147763264	5000	*	1.20238
chr2	147823265	147828264	5000	*	1.28101
chr2	147938265	147943264	5000	*	1.06585
chr2	148383264	148393263	10000	*	1.11801
chr2	149708263	149723262	15000	*	1.15809
chr2	149893263	149913262	20000	*	1.03629
chr2	149948263	149958262	10000	*	1.07789
chr2	150723262	150728261	5000	*	1.00943
chr2	150888262	150893261	5000	*	1.1042
chr2	151683262	151698261	15000	*	1.05719
chr2	152403261	152433260	30000	*	1.24235
chr2	152798261	152803260	5000	*	1.13049
chr2	152928261	152933260	5000	*	1.00121
chr2	152928261	152933260	5000	*	1.81862
chr2	153098261	153103260	5000	*	1.29828
chr2	153703260	153708259	5000	*	1.05932
chr2	154618259	154623258	5000	*	1.00378
chr2	154628259	154633258	5000	*	1.38803
chr2	154763259	154768258	5000	*	1.43605
chr2	155008259	155013258	5000	*	1.06447
chr2	155208259	155223258	15000	*	1.04588
chr2	155443259	155458258	15000	*	1.32989
chr2	155853258	155873257	20000	*	1.02359
chr2	156498258	156503257	5000	*	1.04869
chr2	157083257	157093256	10000	*	1.15173
chr2	158438256	158443255	5000	*	1.28269
chr2	158728256	158733255	5000	*	1.08954
chr2	158778256	158788255	10000	*	1.15479
chr2	158803256	158808255	5000	*	1.03764
chr2	159068256	159073255	5000	*	1.62817
chr2	159193256	159203255	10000	*	1.00055
chr2	159593255	159598254	5000	*	1.12189
chr2	159648255	159663254	15000	*	1.13614
chr2	160388255	160393254	5000	*	1.34614
chr2	161073254	161078253	5000	*	1.36957
chr2	161198254	161213253	15000	*	1.09273
chr2	161773254	161778253	5000	*	1.10932
chr2	161888254	161893253	5000	*	1.23159
chr2	162383253	162388252	5000	*	1.09121
chr2	162443253	162448252	5000	*	1.22779
chr2	162863253	162868252	5000	*	1.47491
chr2	162878253	162888252	10000	*	1.16507
chr2	164193252	164198251	5000	*	1.26262
chr2	164453252	164458251	5000	*	1.10092
chr2	164788251	164793250	5000	*	1.03343
chr2	165373251	165378250	5000	*	1.24711
chr2	165533251	165548250	15000	*	1.10913
chr2	166068250	166073249	5000	*	1.06708
chr2	166173250	166183249	10000	*	1.38485
chr2	166368250	166373249	5000	*	1.35091
chr2	166723250	166728249	5000	*	1.04243
chr2	167923249	167933248	10000	*	1.01278
chr2	168038249	168043248	5000	*	1.24614
chr2	168208249	168218248	10000	*	1.10284
chr2	168373248	168378247	5000	*	1.18284
chr2	169333248	169338247	5000	*	1.14916
chr2	169498248	169513247	15000	*	1.24168
chr2	169688247	169693246	5000	*	1.1135
chr2	170108247	170133246	25000	*	1.44798
chr2	170243247	170248246	5000	*	1.30301
chr2	170328247	170338246	10000	*	1.12577
chr2	170798247	170813246	15000	*	1.00073
chr2	171073246	171078245	5000	*	1.34504
chr2	172038246	172043245	5000	*	1.85765
chr2	172388245	172393244	5000	*	1.01045
chr2	173203245	173208244	5000	*	1.01697
chr2	173843244	173848243	5000	*	1.14443
chr2	175753243	175758242	5000	*	1.06116
chr2	176608242	176623241	15000	*	1.45727
chr2	176788242	176793241	5000	*	1.08694
chr2	177388241	177398240	10000	*	1.05899
chr2	177508241	177513240	5000	*	1.0303
chr2	178073241	178078240	5000	*	1.12016
chr2	178758240	178763239	5000	*	1.4941
chr2	179333240	179343239	10000	*	1.33202
chr2	179668239	179673238	5000	*	1.04548
chr2	180113239	180118238	5000	*	1.04796
chr2	180778239	180783238	5000	*	1.3922
chr2	181028238	181038237	10000	*	1.10129
chr2	181218238	181223237	5000	*	1.31553
chr2	181263238	181268237	5000	*	1.05391
chr2	181493238	181498237	5000	*	1.00566
chr2	181723238	181728237	5000	*	1.02046
chr2	181853238	181858237	5000	*	1.05456
chr2	182063238	182068237	5000	*	1.10749
chr2	182158238	182163237	5000	*	1.09008
chr2	182568237	182573236	5000	*	1.08632
chr2	183743236	183763235	20000	*	1.1973
chr2	183913236	183918235	5000	*	1.05204
chr2	183983236	183988235	5000	*	1.24445
chr2	184198236	184203235	5000	*	1.03657
chr2	185298235	185303234	5000	*	1.10275
chr2	186468234	186478233	10000	*	1.55869
chr2	186563234	186573233	10000	*	1.0192
chr2	187113234	187133233	20000	*	1.28849
chr2	187688233	187698232	10000	*	1.01919
chr2	187958233	187973232	15000	*	1.06655
chr2	188348233	188358232	10000	*	1.35162
chr2	189183232	189188231	5000	*	1.50875
chr2	189558232	189568231	10000	*	1.02051
chr2	189573232	189578231	5000	*	1.13602
chr2	189618232	189623231	5000	*	1.16328
chr2	190088231	190093230	5000	*	1.0044
chr2	190388231	190393230	5000	*	1.40432
chr2	191348230	191353229	5000	*	1.15974
chr2	191398230	191403229	5000	*	1.1528
chr2	191628230	191633229	5000	*	1.14366
chr2	192488229	192503228	15000	*	1.04536
chr2	192783229	192788228	5000	*	1.02101
chr2	195033227	195053226	20000	*	1.04194
chr2	195058227	195063226	5000	*	1.14178
chr2	195128227	195133226	5000	*	1.20964
chr2	195458227	195508226	50000	*	1.26344
chr2	196138226	196143225	5000	*	1.12943
chr2	196208226	196228225	20000	*	1.12173
chr2	196233226	196238225	5000	*	1.00539
chr2	196313226	196328225	15000	*	1.00678
chr2	196458226	196463225	5000	*	1.05278
chr2	196498226	196503225	5000	*	1.52403
chr2	197198226	197208225	10000	*	1.3483
chr2	197263226	197268225	5000	*	1.30136
chr2	198013225	198018224	5000	*	1.07885
chr2	198073225	198078224	5000	*	1.07871
chr2	198493225	198498224	5000	*	1.17667
chr2	199013224	199028223	15000	*	1.11964
chr2	199053224	199058223	5000	*	1.40712
chr2	199098224	199103223	5000	*	1.20773
chr2	199188224	199193223	5000	*	1.11018
chr2	199273224	199278223	5000	*	1.07809
chr2	199533224	199543223	10000	*	1.03709
chr2	199553224	199558223	5000	*	1.62823
chr2	199653224	199673223	20000	*	1.10571
chr2	199913223	199918222	5000	*	1.19928
chr2	200043223	200053222	10000	*	1.38747
chr2	200253223	200263222	10000	*	1.01102
chr2	200278223	200283222	5000	*	1.06667
chr2	200683223	200698222	15000	*	1.03291
chr2	201123222	201128221	5000	*	1.00793
chr2	201398222	201403221	5000	*	1.04642
chr2	201738222	201748221	10000	*	1.08111
chr2	201758222	201783221	25000	*	1.07435
chr2	201853222	201858221	5000	*	1.14465
chr2	202803221	202813220	10000	*	1.1736
chr2	202973221	202978220	5000	*	1.10495
chr2	203863220	203893219	30000	*	1.08768
chr2	204458220	204463219	5000	*	1.23191
chr2	205043219	205053218	10000	*	1.2124
chr2	205453219	205463218	10000	*	1.23901
chr2	205558219	205563218	5000	*	1.78764
chr2	205578219	205593218	15000	*	1.10025
chr2	205958219	205968218	10000	*	1.34607
chr2	205973219	205978218	5000	*	1.04125
chr2	206143218	206148217	5000	*	1.08156
chr2	206928218	206933217	5000	*	1.33727
chr2	207193218	207208217	15000	*	1.60464
chr2	207683217	207688216	5000	*	1.04406
chr2	208033217	208038216	5000	*	1.08853
chr2	208198217	208208216	10000	*	1.01745
chr2	208303217	208318216	15000	*	1.10736
chr2	209013216	209018215	5000	*	1.3124
chr2	209413216	209428215	15000	*	1.20069
chr2	210058215	210068214	10000	*	1.05524
chr2	210243215	210263214	20000	*	1.58588
chr2	210643215	210648214	5000	*	1.34004
chr2	211008215	211013214	5000	*	1.01254
chr2	211188214	211203213	15000	*	1.01639
chr2	211608214	211613213	5000	*	1.01265
chr2	211753214	211758213	5000	*	1.03703
chr2	213313213	213318212	5000	*	1.02408
chr2	213723212	213728211	5000	*	1.09795
chr2	213733212	213738211	5000	*	1.13854
chr2	214503212	214508211	5000	*	1.13951
chr2	214653212	214663211	10000	*	1.0701
chr2	214718212	214743211	25000	*	1.16428
chr2	214823212	214843211	20000	*	1.15585
chr2	215298211	215303210	5000	*	1.33674
chr2	215848211	215853210	5000	*	1.67761
chr2	216298210	216303209	5000	*	1.19542
chr2	216743210	216748209	5000	*	1.16603
chr2	216808210	216818209	10000	*	1.58024
chr2	216838210	216848209	10000	*	1.37995
chr2	217058210	217068209	10000	*	1.12403
chr2	217918209	217933208	15000	*	1.25154
chr2	218268209	218273208	5000	*	1.62979
chr2	218293209	218313208	20000	*	1.00239
chr2	218543209	218548208	5000	*	1.00656
chr2	218573209	218578208	5000	*	1.20873
chr2	219293208	219298207	5000	*	1.1656
chr2	219918208	219933207	15000	*	1.16479
chr2	220178207	220193206	15000	*	1.062
chr2	220698207	220708206	10000	*	1.05086
chr2	221103207	221108206	5000	*	1.22649
chr2	221133207	221138206	5000	*	1.32087
chr2	221488206	221493205	5000	*	1.04537
chr2	221883206	221893205	10000	*	1.27392
chr2	222013206	222028205	15000	*	1.14666
chr2	222063206	222073205	10000	*	1.10276
chr2	222373206	222378205	5000	*	1.34714
chr2	223053205	223063204	10000	*	1.00277
chr2	223128205	223133204	5000	*	1.18259
chr2	224053204	224058203	5000	*	1.12124
chr2	224238204	224243203	5000	*	1.04188
chr2	224483204	224493203	10000	*	1.12393
chr2	224973204	224983203	10000	*	1.11521
chr2	225283203	225288202	5000	*	1.05846
chr2	225543203	225548202	5000	*	1.26925
chr2	225973203	225978202	5000	*	1.09168
chr2	226773202	226788201	15000	*	1.39668
chr2	226963202	226973201	10000	*	1.18089
chr2	227073202	227078201	5000	*	1.14178
chr2	227673201	227688200	15000	*	1.02043
chr2	227893201	227898200	5000	*	1.1284
chr2	228153201	228158200	5000	*	1.07536
chr2	229408200	229413199	5000	*	1.26247
chr2	229728200	229733199	5000	*	1.01014
chr2	229728200	229733199	5000	*	1.0501
chr2	229758200	229768199	10000	*	1.12693
chr2	229863200	229878199	15000	*	1.01999
chr2	230298199	230303198	5000	*	1.04987
chr2	230358199	230363198	5000	*	1.11365
chr2	230373199	230378198	5000	*	1.03838
chr2	230588199	230608198	20000	*	1.09735
chr2	230633199	230638198	5000	*	1.03845
chr2	230848199	230853198	5000	*	1.07036
chr2	231033199	231038198	5000	*	1.07319
chr2	231308199	231313198	5000	*	1.01428
chr2	232398198	232408197	10000	*	1.07521
chr2	233478197	233483196	5000	*	1.11984
chr2	233583197	233588196	5000	*	1.04273
chr2	233678197	233698196	20000	*	1.1851
chr2	234158196	234173195	15000	*	1.00906
chr2	236033195	236048194	15000	*	1.09727
chr2	236333195	236338194	5000	*	1.08759
chr2	236833194	236838193	5000	*	1.00936
chr2	237143194	237158193	15000	*	1.10158
chr2	237548194	237553193	5000	*	1.13549
chr2	237868193	237883192	15000	*	1.16184
chr2	238003193	238008192	5000	*	1.19572
chr2	238093193	238098192	5000	*	1.07201
chr2	238413193	238428192	15000	*	1.66593
chr2	239173192	239178191	5000	*	1.1831
chr2	239353192	239363191	10000	*	1.04859
chr2	239468192	239488191	20000	*	1.08669
chr2	240333191	240343190	10000	*	1.13517
chr2	240978191	240983190	5000	*	1.18177
chr3	19661	24660	5000	*	1.02314
chr3	814660	819659	5000	*	1.04538
chr3	1209660	1214659	5000	*	1.00112
chr3	1504660	1524659	20000	*	1.02004
chr3	2124659	2129658	5000	*	1.12282
chr3	2634659	2644658	10000	*	1.52697
chr3	3369658	3379657	10000	*	1.16971
chr3	3499658	3514657	15000	*	1.26299
chr3	4309657	4314656	5000	*	1.56075
chr3	4624657	4634656	10000	*	1.27912
chr3	4644657	4649656	5000	*	1.15455
chr3	4824657	4829656	5000	*	1.03015
chr3	5344657	5349656	5000	*	1.00008
chr3	5669656	5679655	10000	*	1.16319
chr3	6319656	6324655	5000	*	1.09049
chr3	7324655	7334654	10000	*	1.00283
chr3	7759655	7769654	10000	*	1.26176
chr3	7819655	7829654	10000	*	1.16622
chr3	10539653	10554652	15000	*	1.19784
chr3	10819652	10829651	10000	*	1.00172
chr3	11009652	11024651	15000	*	1.16923
chr3	11099652	11104651	5000	*	1.55169
chr3	12714651	12719650	5000	*	1.0906
chr3	12964651	12979650	15000	*	1.04009
chr3	13219650	13229649	10000	*	1.09273
chr3	13939650	13969649	30000	*	1.15022
chr3	14014650	14024649	10000	*	1.32665
chr3	14019650	14024649	5000	*	1.03418
chr3	14089650	14094649	5000	*	1.474
chr3	14479649	14484648	5000	*	1.07135
chr3	15219649	15234648	15000	*	1.1085
chr3	16254648	16264647	10000	*	1.42709
chr3	16304648	16309647	5000	*	1.08288
chr3	16909647	16919646	10000	*	1.24351
chr3	17264647	17274646	10000	*	1.01553
chr3	17574647	17584646	10000	*	1.26243
chr3	17799647	17809646	10000	*	1.24974
chr3	17994647	18004646	10000	*	1.09036
chr3	18974646	18979645	5000	*	1.04068
chr3	19669645	19684644	15000	*	1.07544
chr3	19744645	19754644	10000	*	1.3209
chr3	20184645	20189644	5000	*	1.15656
chr3	20359645	20374644	15000	*	1.00084
chr3	21009644	21019643	10000	*	1.08967
chr3	21449644	21454643	5000	*	1.08944
chr3	21709644	21714643	5000	*	1.01825
chr3	21799644	21804643	5000	*	1.75374
chr3	21844644	21849643	5000	*	1.33628
chr3	22024643	22034642	10000	*	1.29293
chr3	22314643	22324642	10000	*	1.01509
chr3	22384643	22394642	10000	*	1.27015
chr3	23344642	23359641	15000	*	1.25611
chr3	23639642	23644641	5000	*	1.2235
chr3	23749642	23754641	5000	*	1.26106
chr3	24184642	24209641	25000	*	1.1284
chr3	24299642	24304641	5000	*	1.22706
chr3	24714641	24729640	15000	*	1.00121
chr3	24934641	24954640	20000	*	1.35931
chr3	25789640	25794639	5000	*	1.09379
chr3	25939640	25944639	5000	*	1.11445
chr3	26789640	26799639	10000	*	1.39845
chr3	27499639	27504638	5000	*	1.06799
chr3	28929638	28939637	10000	*	1.01401
chr3	28934638	28944637	10000	*	1.15281
chr3	28994638	28999637	5000	*	1.20805
chr3	29199638	29229637	30000	*	1.01185
chr3	31059636	31064635	5000	*	1.14766
chr3	31529636	31539635	10000	*	1.07056
chr3	31564636	31569635	5000	*	1.04302
chr3	31579636	31584635	5000	*	1.23499
chr3	31604636	31609635	5000	*	1.12894
chr3	32004636	32014635	10000	*	1.02798
chr3	32364635	32374634	10000	*	1.39704
chr3	32919635	32929634	10000	*	1.11709
chr3	33879634	33894633	15000	*	1.19283
chr3	33919634	33929633	10000	*	1.07259
chr3	34699633	34704632	5000	*	1.12314
chr3	34919633	34924632	5000	*	1.23706
chr3	35174633	35179632	5000	*	1.21696
chr3	35194633	35204632	10000	*	1.02853
chr3	35249633	35254632	5000	*	1.07478
chr3	35729633	35734632	5000	*	1.37026
chr3	35809632	35814631	5000	*	1.29904
chr3	36364632	36379631	15000	*	1.10783
chr3	38824630	38834629	10000	*	1.05506
chr3	40229629	40254628	25000	*	1.00444
chr3	40469629	40484628	15000	*	1.02214
chr3	40504629	40509628	5000	*	1.31553
chr3	40919628	40944627	25000	*	1.82155
chr3	41639628	41644627	5000	*	1.0904
chr3	41789628	41809627	20000	*	1.36758
chr3	42074628	42079627	5000	*	1.48431
chr3	42114627	42124626	10000	*	1.05191
chr3	42264627	42269626	5000	*	1.01586
chr3	42749627	42754626	5000	*	1.0086
chr3	43149627	43154626	5000	*	1.10595
chr3	43639626	43649625	10000	*	1.31434
chr3	44254626	44259625	5000	*	1.00321
chr3	44414626	44419625	5000	*	1.14173
chr3	44424626	44429625	5000	*	1.68982
chr3	44579626	44584625	5000	*	1.09476
chr3	44769625	44774624	5000	*	1.00284
chr3	45104625	45114624	10000	*	1.2341
chr3	45444625	45454624	10000	*	1.12887
chr3	45464625	45474624	10000	*	1.07482
chr3	45604625	45619624	15000	*	1.0165
chr3	45609625	45644624	35000	*	1.13858
chr3	45824625	45844624	20000	*	1.23814
chr3	45934624	45939623	5000	*	1.35751
chr3	45979624	45989623	10000	*	1.29604
chr3	46024624	46029623	5000	*	1.06501
chr3	46104624	46114623	10000	*	1.44008
chr3	46134624	46144623	10000	*	1.22232
chr3	46164624	46179623	15000	*	1.18176
chr3	47034624	47054623	20000	*	1.00441
chr3	47109624	47124623	15000	*	1.08708
chr3	47164623	47184622	20000	*	1.02976
chr3	47254623	47269622	15000	*	1.5853
chr3	47284623	47289622	5000	*	1.25897
chr3	47339623	47344622	5000	*	1.66189
chr3	47429623	47434622	5000	*	1.30791
chr3	47434623	47444622	10000	*	1.03415
chr3	47464623	47469622	5000	*	1.07801
chr3	47824623	47829622	5000	*	1.28284
chr3	47909623	47914622	5000	*	1.01737
chr3	47994623	48004622	10000	*	1.19139
chr3	49069622	49079621	10000	*	1.0784
chr3	49364622	49374621	10000	*	1.40251
chr3	49619622	49624621	5000	*	1.01438
chr3	50324621	50339620	15000	*	1.15903
chr3	50434621	50454620	20000	*	1.07462
chr3	50714621	50719620	5000	*	1.08955
chr3	50769621	50789620	20000	*	1.03226
chr3	50889621	50909620	20000	*	1.14112
chr3	51029620	51039619	10000	*	1.1387
chr3	51279620	51284619	5000	*	1.00966
chr3	51389620	51394619	5000	*	1.36176
chr3	52059620	52064619	5000	*	1.06455
chr3	52364619	52369618	5000	*	1.32653
chr3	52649619	52654618	5000	*	1.08549
chr3	52724619	52734618	10000	*	1.0518
chr3	52964619	52974618	10000	*	1.08622
chr3	53719618	53724617	5000	*	1.0258
chr3	55004617	55014616	10000	*	1.10836
chr3	55754617	55759616	5000	*	1.31819
chr3	55869617	55884616	15000	*	1.1832
chr3	55964617	55974615	9999	*	1.09349
chr3	56344616	56354615	10000	*	1.07581
chr3	57004616	57009615	5000	*	1.50404
chr3	57654615	57659614	5000	*	1.00693
chr3	58649614	58659613	10000	*	1.18555
chr3	58694614	58699613	5000	*	1.3471
chr3	58834614	58844613	10000	*	1.07535
chr3	59074614	59089613	15000	*	1.44798
chr3	59369614	59384613	15000	*	1.06144
chr3	59624614	59634613	10000	*	1.15683
chr3	59884613	59904612	20000	*	1.31373
chr3	60294613	60324612	30000	*	1.07382
chr3	60604613	60614612	10000	*	1.01643
chr3	61179612	61184611	5000	*	1.29113
chr3	61314612	61319611	5000	*	1.0837
chr3	61499612	61509611	10000	*	1.07301
chr3	61704612	61709611	5000	*	1.00038
chr3	61839612	61849611	10000	*	1.10741
chr3	62414611	62419610	5000	*	1.09637
chr3	62854611	62859610	5000	*	1.16388
chr3	62924611	62934610	10000	*	1.15203
chr3	63284611	63289610	5000	*	1.39325
chr3	63459611	63469610	10000	*	1.11231
chr3	63779610	63784609	5000	*	1.47523
chr3	64169610	64184609	15000	*	1.09068
chr3	64494610	64499609	5000	*	1.20086
chr3	64899609	64904608	5000	*	1.15976
chr3	64914609	64929608	15000	*	1.28754
chr3	64979609	64999608	20000	*	1.37326
chr3	65284609	65289608	5000	*	1.04603
chr3	65359609	65374608	15000	*	1.02555
chr3	65419609	65424608	5000	*	1.08285
chr3	65744609	65774608	30000	*	1.18456
chr3	66219608	66229607	10000	*	1.03399
chr3	66369608	66379607	10000	*	1.28117
chr3	66674608	66684607	10000	*	1.06416
chr3	67244608	67249607	5000	*	1.26547
chr3	67249608	67264607	15000	*	1.51595
chr3	67924607	67929606	5000	*	1.55275
chr3	68244607	68259606	15000	*	1.0195
chr3	68389607	68394606	5000	*	1.28027
chr3	69219606	69224605	5000	*	1.01745
chr3	69429606	69439605	10000	*	1.156
chr3	70019605	70034604	15000	*	1.03102
chr3	71169604	71174603	5000	*	1.12938
chr3	71534604	71549603	15000	*	1.04412
chr3	71674604	71684603	10000	*	1.0683
chr3	72019604	72029603	10000	*	1.40612
chr3	72054604	72069603	15000	*	1.18413
chr3	72729603	72744602	15000	*	1.4781
chr3	73009603	73019602	10000	*	1.03358
chr3	73034603	73054602	20000	*	1.42572
chr3	73154603	73169602	15000	*	1.12695
chr3	74549602	74564601	15000	*	1.00285
chr3	74754602	74759601	5000	*	1.43489
chr3	75314601	75319600	5000	*	1.05463
chr3	75319601	75324600	5000	*	1.17058
chr3	75794601	75799600	5000	*	1.18951
chr3	75849601	75854600	5000	*	1.20423
chr3	76439600	76444599	5000	*	1.33859
chr3	76619600	76624599	5000	*	1.15582
chr3	77079600	77089599	10000	*	1.72248
chr3	77919599	77929598	10000	*	1.17692
chr3	77994599	77999598	5000	*	1.2972
chr3	78324599	78334598	10000	*	1.36695
chr3	79519598	79524597	5000	*	1.03448
chr3	80219597	80224596	5000	*	1.02888
chr3	80979597	80984596	5000	*	1.04328
chr3	81189596	81194595	5000	*	1.15985
chr3	81434596	81444595	10000	*	1.24344
chr3	81504596	81514595	10000	*	1.14545
chr3	81569596	81574595	5000	*	1.06027
chr3	82079596	82084595	5000	*	1.02262
chr3	82104596	82109595	5000	*	1.0049
chr3	82599595	82604594	5000	*	1.01678
chr3	83714594	83719593	5000	*	1.1667
chr3	84224594	84229593	5000	*	1.38393
chr3	84554594	84559593	5000	*	1.46664
chr3	84824594	84834593	10000	*	1.09606
chr3	84899594	84914593	15000	*	1.10677
chr3	85049593	85064592	15000	*	1.09549
chr3	85259593	85264592	5000	*	1.18527
chr3	85529593	85539592	10000	*	1.13557
chr3	85629593	85634592	5000	*	1.14714
chr3	86099593	86109592	10000	*	1.03907
chr3	86219593	86224592	5000	*	1.14521
chr3	86349592	86359591	10000	*	1.04944
chr3	87319592	87324591	5000	*	1.01847
chr3	87959591	87964590	5000	*	1.14801
chr3	88239591	88249590	10000	*	1.03965
chr3	88674591	88714590	40000	*	1.21827
chr3	88759590	88779589	20000	*	1.09055
chr3	89874590	89879589	5000	*	1.04491
chr3	90654589	90679588	25000	*	1.15703
chr3	93754587	93769586	15000	*	1.0959
chr3	93919586	93929585	10000	*	1.23489
chr3	94594586	94599585	5000	*	1.0373
chr3	94689586	94694585	5000	*	1.08737
chr3	94759586	94764585	5000	*	1.03013
chr3	94859586	94864585	5000	*	1.09753
chr3	95519585	95524584	5000	*	1.0664
chr3	95639585	95644584	5000	*	1.35447
chr3	96214585	96219584	5000	*	1.13048
chr3	97124584	97144583	20000	*	1.23992
chr3	97319584	97329583	10000	*	1.08972
chr3	97429584	97434583	5000	*	1.21565
chr3	97779583	97789582	10000	*	1.13889
chr3	97824583	97834582	10000	*	1.12939
chr3	98284583	98289582	5000	*	1.16863
chr3	98359583	98364582	5000	*	1.05371
chr3	99424582	99434581	10000	*	1.10273
chr3	100499581	100504580	5000	*	1.04158
chr3	100724581	100729580	5000	*	1.1352
chr3	100789581	100794580	5000	*	1.23969
chr3	101439580	101444579	5000	*	1.13507
chr3	101639580	101644579	5000	*	1.16572
chr3	103204579	103219578	15000	*	1.21542
chr3	103249579	103264578	15000	*	1.13268
chr3	104624578	104629577	5000	*	1.31583
chr3	104719578	104734577	15000	*	1.53901
chr3	105684577	105689576	5000	*	1.12439
chr3	105789577	105794576	5000	*	1.44773
chr3	106639576	106664575	25000	*	1.07051
chr3	106919576	106929575	10000	*	1.04389
chr3	106999576	107004575	5000	*	1.17625
chr3	107034576	107039575	5000	*	1.02697
chr3	107324576	107329575	5000	*	1.0395
chr3	107474576	107484575	10000	*	1.05942
chr3	108089575	108104574	15000	*	1.21393
chr3	109264574	109269573	5000	*	1.18676
chr3	109409574	109414573	5000	*	1.07975
chr3	109499574	109504573	5000	*	1.04589
chr3	109654574	109659573	5000	*	1.27178
chr3	110054574	110059573	5000	*	1.16664
chr3	111214573	111239572	25000	*	1.51092
chr3	111474572	111479571	5000	*	1.18815
chr3	111669572	111684571	15000	*	1.18201
chr3	112164572	112169571	5000	*	1.15981
chr3	112279572	112289571	10000	*	1.35257
chr3	112329572	112334571	5000	*	1.00821
chr3	113589571	113594570	5000	*	1.48491
chr3	114119570	114129569	10000	*	1.06575
chr3	114204570	114214569	10000	*	1.0143
chr3	114389570	114394569	5000	*	1.16567
chr3	115139570	115144569	5000	*	1.01508
chr3	116039569	116049568	10000	*	1.31433
chr3	116489568	116504567	15000	*	1.2353
chr3	116714568	116724567	10000	*	1.13636
chr3	119174566	119184565	10000	*	1.19297
chr3	119454566	119464565	10000	*	1.01428
chr3	120344565	120349564	5000	*	1.20771
chr3	121609564	121619563	10000	*	1.03253
chr3	122359564	122364563	5000	*	1.6928
chr3	123259563	123264562	5000	*	1.08352
chr3	123859563	123884562	25000	*	1.10312
chr3	124014563	124019562	5000	*	1.21145
chr3	125164562	125174561	10000	*	1.02108
chr3	125564561	125574560	10000	*	1.10308
chr3	125599561	125619560	20000	*	1.10704
chr3	125814561	125819560	5000	*	1.11495
chr3	125974561	125984560	10000	*	1.4646
chr3	126209561	126214560	5000	*	1.02604
chr3	126534561	126539560	5000	*	1.57871
chr3	127514560	127519559	5000	*	1.25017
chr3	127824560	127834558	9999	*	1.06585
chr3	128359559	128369558	10000	*	1.12047
chr3	128794559	128804558	10000	*	1.14299
chr3	128839559	128844558	5000	*	1.51417
chr3	129294558	129299557	5000	*	1.20964
chr3	129509558	129519557	10000	*	1.17471
chr3	130694557	130709556	15000	*	1.04687
chr3	130889557	130894556	5000	*	1.17608
chr3	130964557	130969556	5000	*	1.012
chr3	131164557	131169556	5000	*	1.31936
chr3	131264557	131274556	10000	*	1.0748
chr3	131479557	131484556	5000	*	1.12739
chr3	131644556	131649555	5000	*	1.09571
chr3	132294556	132304555	10000	*	1.15035
chr3	132479556	132484555	5000	*	1.21286
chr3	133114555	133129554	15000	*	1.13256
chr3	133244555	133249554	5000	*	1.04871
chr3	133459555	133469554	10000	*	1.063
chr3	133909555	133914554	5000	*	1.20685
chr3	134539554	134544553	5000	*	1.13304
chr3	134939554	134944553	5000	*	1.17852
chr3	135299554	135304553	5000	*	1.27399
chr3	135384554	135399552	14999	*	1.1051
chr3	135814553	135819552	5000	*	1.00043
chr3	136089553	136094552	5000	*	1.0926
chr3	137399552	137439551	40000	*	1.03987
chr3	137664552	137674551	10000	*	1.23109
chr3	138254551	138264550	10000	*	1.0316
chr3	138374551	138394550	20000	*	1.15465
chr3	138514551	138524550	10000	*	1.17178
chr3	138774551	138779550	5000	*	1.3028
chr3	139194550	139214549	20000	*	1.15891
chr3	140559549	140574548	15000	*	1.01985
chr3	141089549	141094548	5000	*	1.61335
chr3	141239549	141244548	5000	*	1.03368
chr3	141469549	141474548	5000	*	1.12854
chr3	141884548	141889547	5000	*	1.12795
chr3	142144548	142149547	5000	*	1.01078
chr3	142379548	142394547	15000	*	1.00283
chr3	142779548	142784547	5000	*	1.00066
chr3	143579547	143589546	10000	*	1.48716
chr3	143859547	143884546	25000	*	1.05426
chr3	145319546	145339545	20000	*	1.10495
chr3	145649545	145654544	5000	*	1.21409
chr3	146114545	146119544	5000	*	1.22988
chr3	146344545	146349544	5000	*	1.1574
chr3	146929544	146934543	5000	*	1.26806
chr3	146944544	146959543	15000	*	1.00821
chr3	147009544	147014543	5000	*	1.0551
chr3	147189544	147194543	5000	*	1.05079
chr3	147484544	147504543	20000	*	1.0068
chr3	147544544	147549543	5000	*	1.03647
chr3	147619544	147624543	5000	*	1.06505
chr3	147764544	147769543	5000	*	1.20813
chr3	148934543	148939542	5000	*	1.03612
chr3	150239542	150254541	15000	*	1.08281
chr3	150734541	150739540	5000	*	1.02271
chr3	150919541	150924540	5000	*	1.01223
chr3	151434541	151439540	5000	*	1.12952
chr3	151554541	151564540	10000	*	1.16648
chr3	151874540	151879539	5000	*	1.08584
chr3	152054540	152064539	10000	*	1.21957
chr3	152374540	152384539	10000	*	1.47395
chr3	152524540	152529539	5000	*	1.10913
chr3	152679540	152689539	10000	*	1.13095
chr3	152769540	152779539	10000	*	1.01144
chr3	153054539	153059538	5000	*	1.00109
chr3	153439539	153444538	5000	*	1.03418
chr3	153494539	153504538	10000	*	1.01538
chr3	154259539	154269538	10000	*	1.0418
chr3	154454538	154479537	25000	*	1.01478
chr3	154714538	154724537	10000	*	1.13168
chr3	155474538	155484537	10000	*	1.07899
chr3	155479538	155484537	5000	*	1.00808
chr3	157164536	157179535	15000	*	1.04973
chr3	157724536	157734535	10000	*	1.20686
chr3	157784536	157789535	5000	*	1.01723
chr3	157869536	157874535	5000	*	1.01343
chr3	158114535	158119534	5000	*	1.6415
chr3	158124535	158134534	10000	*	1.30553
chr3	159094535	159104534	10000	*	1.2295
chr3	159104535	159109534	5000	*	1.40678
chr3	159109535	159119534	10000	*	1.22949
chr3	159184535	159194534	10000	*	1.98501
chr3	159209535	159214534	5000	*	1.19765
chr3	159244535	159259534	15000	*	1.12896
chr3	159394534	159399533	5000	*	1.51937
chr3	159489534	159494533	5000	*	1.05158
chr3	159509534	159514533	5000	*	1.22949
chr3	159534534	159539533	5000	*	1.0277
chr3	159789534	159799533	10000	*	1.04179
chr3	159839534	159844533	5000	*	1.29476
chr3	159894534	159899533	5000	*	1.04642
chr3	159924534	159929533	5000	*	1.12695
chr3	159939534	159944533	5000	*	1.07953
chr3	160659533	160669532	10000	*	1.22949
chr3	160834533	160844532	10000	*	1.35931
chr3	161179533	161184532	5000	*	1.18491
chr3	161559533	161564532	5000	*	1.03578
chr3	161629533	161634532	5000	*	1.01331
chr3	161959532	161984531	25000	*	1.10095
chr3	161989532	161994531	5000	*	1.15625
chr3	162294532	162299531	5000	*	1.14429
chr3	162834532	162839531	5000	*	1.0092
chr3	162964532	162974531	10000	*	1.02147
chr3	163159531	163164530	5000	*	1.42061
chr3	163244531	163254530	10000	*	1.08106
chr3	163849531	163854530	5000	*	1.00804
chr3	164109531	164119530	10000	*	1.00952
chr3	164134531	164144530	10000	*	1.39139
chr3	164139531	164154530	15000	*	1.00631
chr3	164219531	164224530	5000	*	1.17652
chr3	164224531	164239530	15000	*	1.4049
chr3	164429530	164439529	10000	*	1.13169
chr3	164484530	164494529	10000	*	1.2227
chr3	164669530	164679529	10000	*	1.10279
chr3	164684530	164689529	5000	*	1.08454
chr3	164844530	164849529	5000	*	1.01629
chr3	164929530	164934529	5000	*	1.28022
chr3	165069530	165084529	15000	*	1.02456
chr3	165264530	165269529	5000	*	1.04856
chr3	165359530	165369529	10000	*	1.16216
chr3	165429530	165439529	10000	*	1.4941
chr3	165734529	165739528	5000	*	1.11232
chr3	165974529	165989528	15000	*	1.17717
chr3	165994529	166004528	10000	*	1.5019
chr3	166009529	166014528	5000	*	1.36019
chr3	166089529	166094528	5000	*	1.13514
chr3	166214529	166219528	5000	*	1.34005
chr3	166779529	166784528	5000	*	1.1015
chr3	167249528	167264527	15000	*	1.01515
chr3	167634528	167649527	15000	*	1.47711
chr3	167759528	167764527	5000	*	1.0251
chr3	167804528	167809527	5000	*	1.05893
chr3	168384527	168394526	10000	*	1.3529
chr3	169184527	169194526	10000	*	1.07587
chr3	169434526	169444525	10000	*	1.10627
chr3	170624526	170629525	5000	*	1.04214
chr3	170664526	170674525	10000	*	1.05525
chr3	170719525	170739524	20000	*	1.10742
chr3	170754525	170779524	25000	*	1.05887
chr3	171294525	171299524	5000	*	1.06665
chr3	171504525	171509524	5000	*	1.04366
chr3	172044524	172054523	10000	*	1.18565
chr3	172664524	172669523	5000	*	1.11946
chr3	172819524	172824523	5000	*	1.17205
chr3	172999524	173014523	15000	*	1.13722
chr3	173054524	173074523	20000	*	1.01237
chr3	173414523	173439522	25000	*	1.16681
chr3	174229523	174234522	5000	*	1.10176
chr3	174764522	174769521	5000	*	1.04373
chr3	175474522	175484521	10000	*	1.3763
chr3	175829521	175839520	10000	*	1.33179
chr3	175874521	175879520	5000	*	1.20633
chr3	176699521	176704520	5000	*	1.00299
chr3	177414520	177429519	15000	*	1.36592
chr3	177434520	177439519	5000	*	1.26112
chr3	177534520	177539519	5000	*	1.22524
chr3	177764520	177784519	20000	*	1.03865
chr3	177794520	177799519	5000	*	1.16738
chr3	177809520	177814519	5000	*	1.16173
chr3	177884520	177899519	15000	*	1.10286
chr3	178164520	178174519	10000	*	1.01444
chr3	178574519	178594518	20000	*	1.12103
chr3	178829519	178839518	10000	*	1.30988
chr3	178869519	178874518	5000	*	1.09482
chr3	178874519	178879518	5000	*	1.00516
chr3	178934519	178939518	5000	*	1.0459
chr3	179129519	179144518	15000	*	1.0284
chr3	179304519	179309518	5000	*	1.05333
chr3	179594518	179604517	10000	*	1.004
chr3	180094518	180109517	15000	*	1.16842
chr3	180959517	180964516	5000	*	1.06668
chr3	181249517	181259516	10000	*	1.09617
chr3	181669517	181684516	15000	*	1.14567
chr3	181909517	181914516	5000	*	1.16381
chr3	182029517	182034515	4999	*	1.19928
chr3	182599516	182604515	5000	*	1.0353
chr3	182819516	182824515	5000	*	1.07231
chr3	183424515	183434514	10000	*	1.04009
chr3	183509515	183514514	5000	*	1.30356
chr3	183639515	183644514	5000	*	1.00596
chr3	183929515	183934514	5000	*	1.00802
chr3	184444515	184454514	10000	*	1.06427
chr3	184534515	184544514	10000	*	1.67903
chr3	184669514	184689513	20000	*	1.0056
chr3	184799514	184814513	15000	*	1.23306
chr3	185104514	185124513	20000	*	1.59493
chr3	185479514	185499513	20000	*	1.04806
chr3	186339513	186359512	20000	*	1.20163
chr3	186659513	186664512	5000	*	1.0969
chr3	187564512	187569511	5000	*	1.13649
chr3	187704512	187709511	5000	*	1.00469
chr3	188304512	188309511	5000	*	1.35471
chr3	188344511	188349510	5000	*	1.09222
chr3	188889511	188904510	15000	*	1.11263
chr3	189384511	189399510	15000	*	1.11746
chr3	189709510	189714509	5000	*	1.00102
chr3	190069510	190074509	5000	*	1.12085
chr3	190169510	190174509	5000	*	1.27768
chr3	191194509	191219508	25000	*	1.16469
chr3	191739509	191744508	5000	*	1.10653
chr3	192274508	192284507	10000	*	1.14127
chr3	192309508	192314507	5000	*	1.12866
chr3	193649507	193654506	5000	*	1.28007
chr3	193659507	193669506	10000	*	1.20559
chr3	193844507	193854506	10000	*	1.00809
chr3	194219507	194224506	5000	*	1.17223
chr3	194614507	194619506	5000	*	1.04305
chr3	196079505	196084504	5000	*	1.15396
chr3	196359505	196364504	5000	*	1.0259
chr3	197164504	197169503	5000	*	1.13951
chr3	197959504	197964503	5000	*	1.05471
chr4	148944	158943	10000	*	1.00313
chr4	363944	373943	10000	*	1.12956
chr4	1008944	1013943	5000	*	1.19033
chr4	1163944	1178943	15000	*	1.39367
chr4	1393943	1403942	10000	*	1.50957
chr4	1413943	1423942	10000	*	1.02355
chr4	1603943	1618942	15000	*	1.38616
chr4	1648943	1653942	5000	*	1.28901
chr4	2238943	2248942	10000	*	1.19948
chr4	2498943	2503942	5000	*	1.12298
chr4	2513943	2518942	5000	*	1.27971
chr4	2563943	2573942	10000	*	1.07519
chr4	2753942	2788941	35000	*	1.03748
chr4	2763942	2773941	10000	*	1.12263
chr4	3343942	3348941	5000	*	1.18277
chr4	3388942	3393941	5000	*	1.01968
chr4	3553942	3558941	5000	*	1.12922
chr4	3953941	3958940	5000	*	1.03101
chr4	4208941	4218940	10000	*	1.24189
chr4	4298941	4313940	15000	*	1.10785
chr4	4583941	4593940	10000	*	1.06573
chr4	5313940	5318939	5000	*	1.0884
chr4	5808940	5818939	10000	*	1.06948
chr4	6208940	6213939	5000	*	1.13247
chr4	6388940	6403939	15000	*	1.02632
chr4	6453939	6458938	5000	*	1.25026
chr4	6463939	6468938	5000	*	1.08747
chr4	6708939	6713938	5000	*	1.22765
chr4	7073939	7088938	15000	*	1.07158
chr4	7343939	7353938	10000	*	1.07686
chr4	7448939	7458938	10000	*	1.05257
chr4	7608939	7613938	5000	*	1.08316
chr4	7878938	7883937	5000	*	1.20043
chr4	8323938	8338937	15000	*	1.04302
chr4	8478938	8483937	5000	*	1.10718
chr4	9788937	9793936	5000	*	1.04299
chr4	9918937	9938936	20000	*	1.0008
chr4	9933937	9943936	10000	*	1.20032
chr4	9943937	9948936	5000	*	1.13139
chr4	9958937	9963936	5000	*	1.08831
chr4	10483936	10493935	10000	*	1.01774
chr4	10873936	10878935	5000	*	1.0703
chr4	11843935	11853934	10000	*	1.19439
chr4	12743934	12753933	10000	*	1.07323
chr4	12788934	12793933	5000	*	1.30783
chr4	12798934	12803933	5000	*	1.29059
chr4	12833934	12848933	15000	*	1.36851
chr4	12853934	12858933	5000	*	1.52746
chr4	12863934	12868933	5000	*	1.74
chr4	12933934	12938933	5000	*	1.23368
chr4	13733934	13743933	10000	*	1.03162
chr4	14423933	14438932	15000	*	1.15565
chr4	14868933	14878932	10000	*	1.10487
chr4	15463932	15468931	5000	*	1.12133
chr4	15583932	15588931	5000	*	1.47937
chr4	15653932	15663931	10000	*	1.19072
chr4	15673932	15678931	5000	*	1.0438
chr4	15723932	15728931	5000	*	1.04136
chr4	16448932	16463931	15000	*	1.02134
chr4	16803931	16808930	5000	*	1.01138
chr4	16903931	16908930	5000	*	1.01082
chr4	17223931	17228930	5000	*	1.22649
chr4	17243931	17248930	5000	*	1.00899
chr4	17518931	17528930	10000	*	1.17343
chr4	18403930	18433929	30000	*	1.24477
chr4	18763930	18773929	10000	*	1.14916
chr4	19263929	19273928	10000	*	1.07537
chr4	19623929	19633928	10000	*	1.00103
chr4	21693927	21698926	5000	*	1.20274
chr4	21703927	21713926	10000	*	1.02133
chr4	22413927	22433926	20000	*	1.28718
chr4	23143926	23158925	15000	*	1.22095
chr4	23748926	23753925	5000	*	1.00069
chr4	24108925	24123924	15000	*	1.54263
chr4	24268925	24273924	5000	*	1.07853
chr4	24318925	24323924	5000	*	1.26725
chr4	24578925	24588924	10000	*	1.14088
chr4	25123925	25128924	5000	*	1.1785
chr4	25208925	25218924	10000	*	1.12755
chr4	25463924	25468923	5000	*	1.20559
chr4	25813924	25818923	5000	*	1.00106
chr4	26473924	26478923	5000	*	1.67253
chr4	26903923	26908922	5000	*	1.03627
chr4	27088923	27093922	5000	*	1.12203
chr4	27203923	27213922	10000	*	1.00352
chr4	27453923	27463922	10000	*	1.18866
chr4	27793923	27798922	5000	*	1.07581
chr4	28228922	28233921	5000	*	1.02538
chr4	28783922	28788921	5000	*	1.46224
chr4	29053922	29063921	10000	*	1.17681
chr4	29098922	29103921	5000	*	1.0074
chr4	29108922	29113921	5000	*	1.24666
chr4	29173921	29178920	5000	*	1.06365
chr4	29328921	29333920	5000	*	1.30805
chr4	30038921	30043920	5000	*	1.94336
chr4	30198921	30208920	10000	*	1.56658
chr4	30218921	30223920	5000	*	1.0365
chr4	30363921	30368920	5000	*	1.21735
chr4	30403920	30408919	5000	*	1.33775
chr4	30478920	30483919	5000	*	1.11238
chr4	31023920	31033919	10000	*	1.06849
chr4	32583919	32588918	5000	*	1.38705
chr4	32603919	32608918	5000	*	1.1727
chr4	33368918	33373917	5000	*	1.46163
chr4	33468918	33473917	5000	*	1.07148
chr4	34133918	34168916	34999	*	1.46345
chr4	34153918	34158917	5000	*	1.00562
chr4	34198917	34208916	10000	*	1.20084
chr4	34888917	34893916	5000	*	1.4164
chr4	34908917	34913916	5000	*	1.02803
chr4	35603916	35628915	25000	*	1.24912
chr4	36258916	36263915	5000	*	1.65465
chr4	36373916	36378915	5000	*	1.38683
chr4	36713915	36728914	15000	*	1.14466
chr4	37433915	37438914	5000	*	1.11067
chr4	37523915	37528914	5000	*	1.04787
chr4	37683915	37688914	5000	*	1.35543
chr4	37828915	37833914	5000	*	1.0562
chr4	38003914	38008913	5000	*	1.24683
chr4	38203914	38213913	10000	*	1.59802
chr4	38633914	38643913	10000	*	1.4124
chr4	39403913	39408912	5000	*	1.24022
chr4	40053913	40058912	5000	*	1.03625
chr4	40183913	40198912	15000	*	1.30108
chr4	40403913	40428912	25000	*	1.10876
chr4	40538912	40543911	5000	*	1.02002
chr4	40583912	40598911	15000	*	1.18471
chr4	41508912	41513911	5000	*	1.2078
chr4	41518912	41523911	5000	*	1.3617
chr4	41563912	41568911	5000	*	1.1027
chr4	41588912	41593911	5000	*	1.22584
chr4	42458911	42463910	5000	*	1.06848
chr4	42568911	42573910	5000	*	1.04388
chr4	42608911	42613910	5000	*	1.02448
chr4	43063910	43073909	10000	*	1.57466
chr4	43338910	43368909	30000	*	1.21794
chr4	43368910	43398909	30000	*	1.18412
chr4	43493910	43503909	10000	*	1.00883
chr4	44648909	44658908	10000	*	1.24614
chr4	44863909	44868908	5000	*	1.2188
chr4	45313909	45318908	5000	*	1.00917
chr4	45858908	45863907	5000	*	1.14869
chr4	46238908	46253907	15000	*	1.17913
chr4	46418908	46428907	10000	*	1.04422
chr4	46788907	46793906	5000	*	1.74333
chr4	47828907	47838906	10000	*	1.23765
chr4	48273906	48278905	5000	*	1.05179
chr4	48503906	48508905	5000	*	1.00894
chr4	48818906	48823905	5000	*	1.14557
chr4	48883906	48898905	15000	*	1.01036
chr4	48958906	48963905	5000	*	1.15859
chr4	49563905	49568904	5000	*	1.14838
chr4	52123903	52128902	5000	*	1.06765
chr4	52748903	52753902	5000	*	1.02434
chr4	53748902	53753901	5000	*	1.10961
chr4	54648901	54653900	5000	*	1.12795
chr4	55188901	55208900	20000	*	1.01582
chr4	55263901	55268900	5000	*	1.12302
chr4	55663900	55668899	5000	*	1.25228
chr4	55688900	55698899	10000	*	1.36568
chr4	56403900	56418899	15000	*	1.11314
chr4	56628900	56633899	5000	*	1.17504
chr4	56768900	56783899	15000	*	1.32624
chr4	57273899	57278898	5000	*	1.14557
chr4	57893899	57898898	5000	*	1.24398
chr4	57928899	57938898	10000	*	1.04979
chr4	58318898	58323897	5000	*	1.05814
chr4	58443898	58468897	25000	*	1.12213
chr4	58573898	58578897	5000	*	1.24934
chr4	58573898	58578897	5000	*	1.03519
chr4	58648898	58663897	15000	*	1.22794
chr4	58838898	58848897	10000	*	1.1503
chr4	59678897	59683896	5000	*	1.08268
chr4	60033897	60048896	15000	*	1.0377
chr4	60128897	60133896	5000	*	1.0255
chr4	60163897	60168896	5000	*	1.00012
chr4	60593897	60603896	10000	*	1.20808
chr4	61133896	61138895	5000	*	1.19862
chr4	61433896	61438895	5000	*	1.07516
chr4	62448895	62468894	20000	*	1.0269
chr4	62513895	62523894	10000	*	1.2905
chr4	62993895	62998894	5000	*	1.06528
chr4	63013895	63028894	15000	*	1.46211
chr4	63438894	63458893	20000	*	1.07206
chr4	63603894	63608893	5000	*	1.44288
chr4	64963893	64978892	15000	*	1.06502
chr4	65158893	65168892	10000	*	1.00381
chr4	65393893	65403892	10000	*	1.02216
chr4	65608893	65613892	5000	*	1.14557
chr4	66278892	66283891	5000	*	1.75876
chr4	66443892	66448891	5000	*	1.32217
chr4	67393891	67398890	5000	*	1.34933
chr4	67573891	67578890	5000	*	1.09888
chr4	67613891	67618890	5000	*	1.32959
chr4	67658891	67663890	5000	*	1.3612
chr4	67953891	67958890	5000	*	1.13011
chr4	68058891	68078890	20000	*	1.20703
chr4	68073891	68078890	5000	*	1.02414
chr4	68263890	68278889	15000	*	1.05898
chr4	69563889	69568888	5000	*	1.06796
chr4	70168889	70178888	10000	*	1.19783
chr4	70303889	70308888	5000	*	1.56567
chr4	70338889	70343888	5000	*	1.18529
chr4	70528889	70543888	15000	*	1.3004
chr4	71768888	71783887	15000	*	1.61708
chr4	72108887	72123886	15000	*	1.23153
chr4	72353887	72358886	5000	*	1.08768
chr4	72618887	72623886	5000	*	1.02737
chr4	73323886	73338885	15000	*	1.0658
chr4	74258886	74263885	5000	*	1.1948
chr4	75053885	75063884	10000	*	1.09745
chr4	75258885	75268884	10000	*	1.03454
chr4	75323885	75338884	15000	*	1.28635
chr4	75368885	75373884	5000	*	1.05795
chr4	75628885	75633884	5000	*	1.10438
chr4	75638885	75643884	5000	*	1.26175
chr4	75828884	75833883	5000	*	1.12169
chr4	76573884	76578883	5000	*	1.33221
chr4	76828884	76833883	5000	*	1.45854
chr4	77783883	77788882	5000	*	1.12715
chr4	77943883	77948882	5000	*	1.01767
chr4	78118883	78133882	15000	*	1.12116
chr4	78363882	78368881	5000	*	1.07603
chr4	78423882	78433881	10000	*	1.05234
chr4	78468882	78473881	5000	*	1.19715
chr4	78508882	78513881	5000	*	1.09526
chr4	79028882	79038881	10000	*	2.0411
chr4	79198882	79208881	10000	*	1.02111
chr4	79253882	79263881	10000	*	1.4313
chr4	80003881	80008880	5000	*	1.0247
chr4	80268881	80273880	5000	*	1.01482
chr4	80278881	80303880	25000	*	1.70895
chr4	80698881	80703880	5000	*	1.10692
chr4	80848880	80858879	10000	*	1.11021
chr4	80963880	80968879	5000	*	1.0528
chr4	81193880	81198879	5000	*	1.03302
chr4	81683880	81688879	5000	*	1.07427
chr4	81688880	81698879	10000	*	1.13858
chr4	81778880	81783879	5000	*	1.66096
chr4	81918880	81923879	5000	*	1.02801
chr4	82078879	82103878	25000	*	1.09338
chr4	82243879	82253878	10000	*	1.10564
chr4	82263879	82278878	15000	*	1.51482
chr4	82628879	82638878	10000	*	1.20199
chr4	82733879	82738878	5000	*	1.09354
chr4	82773879	82783878	10000	*	1.06387
chr4	83038879	83043878	5000	*	1.02039
chr4	83273879	83288878	15000	*	1.01873
chr4	83323879	83348877	24999	*	1.04715
chr4	83363878	83418877	55000	*	1.05578
chr4	83933878	83943877	10000	*	1.14649
chr4	84608877	84613876	5000	*	1.0562
chr4	84828877	84833876	5000	*	1.14214
chr4	84858877	84868876	10000	*	1.36826
chr4	85908876	85913875	5000	*	1.086
chr4	86608876	86613875	5000	*	1.19764
chr4	87053876	87063875	10000	*	1.21802
chr4	87258875	87268874	10000	*	1.0268
chr4	87358875	87363874	5000	*	1.05784
chr4	87378875	87388874	10000	*	1.07263
chr4	87633875	87638874	5000	*	1.06018
chr4	88183875	88188874	5000	*	1.27812
chr4	88288875	88293874	5000	*	1.02157
chr4	88558874	88583873	25000	*	1.34948
chr4	89048874	89058873	10000	*	1.05191
chr4	89548874	89558873	10000	*	1.03056
chr4	89698873	89703872	5000	*	1.11779
chr4	89918873	89928872	10000	*	1.47711
chr4	90123873	90133872	10000	*	1.24313
chr4	91498872	91503871	5000	*	1.10987
chr4	91728872	91733871	5000	*	1.23334
chr4	92438871	92443870	5000	*	1.27969
chr4	93043871	93053870	10000	*	1.19967
chr4	93833870	93838869	5000	*	1.0286
chr4	94108870	94113869	5000	*	1.12883
chr4	95218869	95223868	5000	*	1.13678
chr4	95913869	95928868	15000	*	1.03122
chr4	96253868	96258867	5000	*	1.19181
chr4	96938868	96943867	5000	*	1.00909
chr4	97593867	97598866	5000	*	1.37029
chr4	98418867	98423866	5000	*	1.08168
chr4	98868866	98873865	5000	*	1.08302
chr4	98878866	98883865	5000	*	1.1133
chr4	99978865	99998864	20000	*	1.0732
chr4	100153865	100158864	5000	*	1.21961
chr4	100998864	101008863	10000	*	1.31391
chr4	101038864	101043863	5000	*	1.06992
chr4	101048864	101053863	5000	*	1.13407
chr4	101178864	101188863	10000	*	1.04151
chr4	101333864	101343863	10000	*	1.40133
chr4	101363864	101368863	5000	*	1.09482
chr4	101393864	101403863	10000	*	1.13858
chr4	101408864	101418863	10000	*	1.09482
chr4	101618864	101623863	5000	*	1.20653
chr4	101628864	101638863	10000	*	1.77855
chr4	101698864	101703863	5000	*	1.22949
chr4	101778864	101793863	15000	*	1.30553
chr4	101808864	101818863	10000	*	1.72747
chr4	101863864	101878863	15000	*	1.18861
chr4	101868864	101873863	5000	*	1.29909
chr4	102223864	102228863	5000	*	1.34809
chr4	102298863	102303862	5000	*	1.36851
chr4	102368863	102383862	15000	*	1.37847
chr4	102413863	102418862	5000	*	1.2295
chr4	102453863	102458862	5000	*	1.24025
chr4	102513863	102538862	25000	*	2.54633
chr4	102963863	102968862	5000	*	1.07404
chr4	103083863	103088862	5000	*	1.01985
chr4	103148863	103153862	5000	*	1.07693
chr4	103378863	103388862	10000	*	1.12479
chr4	105038861	105053860	15000	*	1.5692
[truncated: 10,025 more rows]

## Sheet: H3K27me3_DLD1
chr1	190001	195000	5000	*	1.49158
chr1	800001	805000	5000	*	1.28587
chr1	1080001	1095000	15000	*	1.00263
chr1	1895000	1899999	5000	*	1.10587
chr1	2205000	2219999	15000	*	1.63066
chr1	2250000	2254999	5000	*	1.12139
chr1	2544999	2559998	15000	*	1.09132
chr1	2804999	2824998	20000	*	1.16873
chr1	4674998	4684997	10000	*	1.05871
chr1	5484997	5489996	5000	*	1.1528
chr1	6849996	6854995	5000	*	1.13987
chr1	7194996	7209995	15000	*	1.12425
chr1	8704995	8714994	10000	*	1.06895
chr1	8819995	8829993	9999	*	1.30368
chr1	9154994	9164993	10000	*	1.63909
chr1	10119993	10129992	10000	*	1.20074
chr1	10509993	10529992	20000	*	1.02334
chr1	10959993	10964992	5000	*	1.02173
chr1	13974990	13979989	5000	*	1.076
chr1	15114990	15134988	19999	*	1.10412
chr1	15654989	15659988	5000	*	1.12294
chr1	17414988	17419987	5000	*	1.20169
chr1	20184985	20194984	10000	*	1.22372
chr1	20904985	20914984	10000	*	1.01737
chr1	22389984	22394983	5000	*	1.39147
chr1	22834983	22839982	5000	*	1.17223
chr1	23279983	23284982	5000	*	1.14992
chr1	23669983	23674982	5000	*	1.02035
chr1	24739982	24744981	5000	*	1.71334
chr1	24784982	24799981	15000	*	1.02113
chr1	26064981	26069980	5000	*	1.04741
chr1	28499979	28504978	5000	*	1.31609
chr1	29119978	29129977	10000	*	1.12098
chr1	30694977	30699976	5000	*	1.42987
chr1	33499975	33504974	5000	*	1.23108
chr1	35154974	35169973	15000	*	1.4912
chr1	35284974	35289973	5000	*	1.00944
chr1	36414973	36424972	10000	*	1.18218
chr1	36514973	36524972	10000	*	1.01901
chr1	36804972	36819971	15000	*	1.11546
chr1	37349972	37354971	5000	*	1.47579
chr1	37454972	37464971	10000	*	1.04746
chr1	37494972	37499971	5000	*	1.17786
chr1	39204970	39209969	5000	*	1.0252
chr1	40199970	40204969	5000	*	1.16324
chr1	40579969	40584968	5000	*	1.43073
chr1	41014969	41029968	15000	*	1.3836
chr1	42234968	42239967	5000	*	1.73476
chr1	42844968	42849967	5000	*	1.00071
chr1	42969967	42974966	5000	*	1.2209
chr1	44989966	44999965	10000	*	1.6939
chr1	45274966	45289965	15000	*	1.00443
chr1	46024965	46029964	5000	*	1.09207
chr1	46209965	46219964	10000	*	1.02812
chr1	46824964	46849963	25000	*	1.07023
chr1	46874964	46884963	10000	*	1.00575
chr1	48314963	48324962	10000	*	1.0917
chr1	48574963	48579962	5000	*	1.13785
chr1	52414960	52419959	5000	*	1.1416
chr1	52684960	52689959	5000	*	1.4656
chr1	53324959	53334958	10000	*	1.06011
chr1	53524959	53529958	5000	*	1.11893
chr1	53664959	53669958	5000	*	1.04217
chr1	54359958	54364957	5000	*	1.00919
chr1	54724958	54729957	5000	*	1.31502
chr1	59309954	59324953	15000	*	1.04003
chr1	60249954	60269953	20000	*	1.02263
chr1	60664953	60694952	30000	*	1.17494
chr1	60724953	60734952	10000	*	1.20475
chr1	60859953	60864952	5000	*	1.48496
chr1	60864953	60869952	5000	*	1.80545
chr1	60869953	60874952	5000	*	1.48129
chr1	60874953	60884952	10000	*	2.20106
chr1	60979953	60984952	5000	*	2.83125
chr1	61154953	61164952	10000	*	1.17527
chr1	61244953	61249952	5000	*	1.1317
chr1	61334953	61339952	5000	*	1.95551
chr1	61339953	61354952	15000	*	1.12061
chr1	61389953	61394952	5000	*	1.51234
chr1	61669953	61674952	5000	*	2.30976
chr1	61674953	61679952	5000	*	1.33574
chr1	61689953	61694952	5000	*	1.87146
chr1	61754953	61759952	5000	*	1.06093
chr1	61759953	61769952	10000	*	1.10782
chr1	61769953	61779951	9999	*	1.19589
chr1	61779952	61784951	5000	*	1.04828
chr1	62364952	62384951	20000	*	1.01107
chr1	62599952	62604951	5000	*	1.74966
chr1	62624952	62629951	5000	*	1.48496
chr1	63294951	63304950	10000	*	1.04167
chr1	63679951	63694950	15000	*	1.05782
[truncated: 8,285 more rows]
