# Supplementary material
Source: Research Square preprint supplement (doi:10.21203/rs.3.rs-9763213/v1)
Supplement: Supplementary file 13 [file ae6e2176a0cf968e06d1d37f.xlsx]

## Sheet: vst_expression_data_TCGA
GeneName	TCGA-A6-2675-01	TCGA-A6-2675-11	TCGA-A6-2682-01	TCGA-A6-2682-11	TCGA-A6-2686-01	TCGA-A6-2686-11	TCGA-A6-5659-01	TCGA-A6-5659-11	TCGA-A6-5662-01	TCGA-A6-5662-11	TCGA-A6-5665-01	TCGA-A6-5665-11	TCGA-A6-5667-01	TCGA-A6-5667-11	TCGA-AA-3489-01	TCGA-AA-3489-11	TCGA-AA-3496-01	TCGA-AA-3496-11	TCGA-AA-3511-01	TCGA-AA-3511-11	TCGA-AA-3655-01	TCGA-AA-3655-11	TCGA-AA-3660-01	TCGA-AA-3660-11	TCGA-AA-3662-01	TCGA-AA-3662-11	TCGA-AA-3663-01	TCGA-AA-3663-11	TCGA-AA-3697-01	TCGA-AA-3697-11	TCGA-AA-3712-01	TCGA-AA-3712-11	TCGA-AA-3713-01	TCGA-AA-3713-11	TCGA-AZ-6598-01	TCGA-AZ-6598-11	TCGA-AZ-6599-01	TCGA-AZ-6599-11	TCGA-AZ-6600-01	TCGA-AZ-6600-11	TCGA-AZ-6603-01	TCGA-AZ-6603-11	TCGA-AZ-6605-01	TCGA-AZ-6605-11	TCGA-F4-6704-01	TCGA-F4-6704-11
ENSG00000167578	14.554	14.6714	14.7298	15.9704	15.5031	15.7006	13.4967	15.2624	13.8937	15.1053	12.9313	16.3168	14.241	15.8598	13.6303	15.5056	13.4463	14.929	14.3857	15.2924	13.3062	15.9082	14.3537	16.1219	13.9231	15.1143	14.0071	15.136	14.7746	15.5689	13.4251	15.7834	13.5042	16.2787	14.0489	15.4142	12.8998	14.9322	14.0138	15.5012	14.0404	14.8182	13.9515	13.7781	13.1301	14.8488
ENSG00000078237	13.255	12.9111	13.8827	13.4035	13.1376	13.0612	12.747	13.0949	13.1302	12.5689	13.0467	12.8935	13.6563	12.5713	12.5731	13.6121	12.9639	12.4757	13.4946	12.4804	13.2495	12.8665	16.7925	13.2994	13.2638	11.3118	14.9461	12.3267	14.3878	13.717	13.4619	12.3961	11.9434	14.2725	14.1876	12.1802	12.9786	12.5233	12.905	14.4714	13.4115	13.3831	14.0347	12.5445	12.4827	13.5536
ENSG00000269416	9.90867	10.7059	11.7049	12.1528	11.5353	12.4753	11.1742	11.8746	9.07527	11.6176	12.5495	11.9964	12.0752	12.1762	11.3882	11.4892	11.1926	11.7871	10.2827	12.2836	11.4955	11.7756	12.4987	12.6295	10.2202	11.5099	2.63498	10.9983	10.9106	11.3392	8.84904	12.2231	10.3496	11.8422	10.957	12.1068	9.96492	11.5462	11.2328	11.5926	11.9191	10.8653	10.4864	8.65667	10.4591	12.0148
ENSG00000146083	17.6564	16.3461	16.9397	17.249	16.1618	16.9864	15.3575	16.8623	18.3144	16.5052	16.1359	16.9612	17.6444	17.4071	17.5219	14.9313	18.3324	15.8343	18.1873	17.1099	17.2514	16.359	17.355	16.8366	17.7914	17.0618	16.2204	16.8901	16.9653	15.7193	18.2328	17.1424	17.41	15.3557	18.2179	16.8115	18.2031	16.9983	17.6347	16.7916	17.501	16.1485	16.706	15.9935	16.1854	16.0105
ENSG00000158486	9.83188	9.36235	9.59973	12.081	10.2536	11.1545	11.0232	10.6621	10.8405	8.93695	10.3229	11.5811	11.0526	11.4028	9.62862	8.79301	8.97811	9.8014	9.53128	11.1566	11.1633	10.2215	10.3028	11.6756	10.8368	10.7999	6.29363	10.1858	9.22114	10.2487	9.67709	11.4757	7.7305	8.99965	7.54914	9.27673	11.6723	11.7132	10.5718	9.51559	9.84952	8.68945	8.50769	6.3976	9.70244	8.7706
ENSG00000198242	20.6168	19.7772	21.1366	20.4123	22.7761	20.1999	20.4654	20.2439	21.2037	20.4177	20.8376	19.5611	20.9922	19.9177	20.5211	21.1194	21.7803	20.8517	21.1624	20.6144	20.4626	20.8323	20.9575	20.9036	20.6927	20.9955	22.1498	20.4574	21.4067	20.3356	20.6513	19.9059	20.1477	21.056	20.7804	20.1687	21.2547	19.996	22.5514	20.3891	20.896	20.4788	20.7901	20.6914	21.4828	20.4179
ENSG00000134108	16.3666	17.2341	16.8056	16.8214	17.3395	17.2388	17.3224	17.2942	17.5484	17.3302	16.1112	17.5117	16.6161	16.4693	16.5289	17.5512	16.5784	17.253	15.9524	16.5485	16.6025	17.2311	17.047	17.2367	16.4247	16.8695	17.0375	17.0117	16.9645	17.1667	16.0091	16.7632	16.6731	17.4098	16.6781	16.4255	16.4099	16.4691	16.4979	16.8727	16.9079	16.8087	17.0068	17.7135	16.994	16.7711
ENSG00000172137	11.192	14.755	11.9784	11.1284	8.73946	11.1052	5.33196	11.1679	8.47461	13.4624	10.8954	14.2178	7.60377	12.4643	11.9432	13.7218	5.18099	14.4344	8.24938	11.7393	7.84174	12.6472	7.3668	12.1171	5.88614	13.1071	5.21633	12.6439	8.34916	12.1187	11.9833	10.8828	7.98626	12.9584	9.07032	15.9579	5.74887	13.4374	10.386	12.5846	7.78557	14.2261	10.1877	14.1316	8.69061	13.7315
ENSG00000276644	11.8791	11.4669	13.2695	12.452	11.2586	12.2718	15.9823	12.9251	17.7781	12.0889	11.2965	11.8138	11.1814	12.1762	15.8099	11.4146	15.8056	12.232	15.1836	12.3346	15.238	11.8369	16.355	12.8758	17.1718	12.3658	14.8107	11.8795	13.4625	11.621	15.543	12.4281	14.301	11.4844	17.2541	12.427	16.6749	13.3233	15.328	12.7896	15.5511	12.3663	14.4479	10.6381	16.0347	12.6309
ENSG00000231105	4.84786	5.6791	4.44526	5.88641	5.08232	6.91588	5.55465	6.22917	2.63498	5.00424	9.03946	6.58583	3.39984	5.19529	6.50141	3.84103	4.95965	4.13843	5.196	6.24962	4.51061	4.84369	3.99655	3.97802	6.7124	4.5573	2.63498	5.7137	3.61437	5.60461	4.25556	5.84065	5.80046	4.80499	3.9158	5.78516	4.24981	3.38205	4.3327	5.31084	4.9138	4.33039	5.01307	3.61094	4.47866	5.42587
ENSG00000094963	8.21346	8.97285	8.91222	6.64278	8.24164	8.1178	6.62165	8.03325	5.48798	11.1203	6.06249	8.28436	6.0123	6.90358	12.9382	12.056	8.51347	14.2125	6.2701	7.56322	3.72417	9.9909	5.09267	7.876	6.2972	10.3713	6.29363	11.6372	3.99579	8.51809	4.17967	7.78933	7.241	10.2506	6.8656	10.4688	4.82376	10.6329	7.46032	10.1497	6.49907	13.1254	9.93986	12.5576	10.6683	10.7753
ENSG00000182141	11.4823	11.2579	11.8563	11.5389	8.44593	11.3409	14.2703	11.9018	12.8604	11.5556	11.2033	11.9068	11.8868	11.5537	11.5523	11.1299	11.6833	10.4162	11.44	11.9601	11.4397	12.1065	11.2262	11.7532	12.3759	12.5823	5.74917	11.3738	12.4338	10.9457	10.7726	11.7265	10.565	12.1479	11.6262	11.4488	11.2234	11.6315	11.4477	11.0063	12.445	11.1507	11.0786	10.3956	12.6711	10.8477
ENSG00000280143	13.779	20.142	15.1244	13.4141	12.8468	13.6623	14.752	16.4524	15.5097	19.6612	14.2279	15.0761	16.527	16.0477	14.7614	18.5426	14.1139	21.431	14.5906	13.0317	12.3409	18.6422	13.0017	13.5304	12.6747	15.1037	11.6948	19.0013	13.0428	15.8898	13.8466	15.0121	13.6341	16.7478	12.5039	19.0893	12.0339	15.4428	15.6182	15.3721	13.9879	18.8555	14.4393	23.6997	18.0911	19.0236
ENSG00000258610	8.72854	2.63498	2.63498	8.65138	8.07248	8.6639	6.97412	9.27323	7.14972	8.54736	7.61581	7.65604	4.9892	8.41673	8.95862	6.06707	9.34644	8.72691	9.46122	6.67574	7.1969	7.01201	8.8393	5.96368	9.23616	7.29267	7.59068	8.64331	7.05086	7.30164	9.31677	7.86488	5.08743	8.16375	8.47545	8.22573	7.62765	8.00863	8.58617	2.63498	8.20684	8.05204	8.20588	8.37158	8.64142	5.56268
ENSG00000185105	11.5769	4.6389	8.90386	6.50327	9.02323	8.08969	8.47415	2.63498	10.6489	3.50335	5.79016	5.63945	8.23327	3.85084	9.06756	3.84103	9.20566	5.7586	3.87685	2.63498	8.39307	3.95451	11.9535	7.99532	10.6147	3.46752	2.63498	5.52365	10.7909	7.03106	10.1288	6.58803	5.17781	7.19128	3.9158	7.08716	5.49204	3.68032	6.49071	2.63498	11.9143	4.97686	11.2166	4.49321	6.72282	3.31322
ENSG00000102174	5.20319	8.61717	6.67293	5.61722	7.82859	8.53291	8.27375	7.55325	5.48798	7.90416	8.16604	6.15932	9.46677	4.8514	7.96771	7.62476	5.29294	9.21297	6.0904	5.97672	8.71327	6.05754	6.5143	4.57383	4.72421	4.04079	6.29363	7.16444	4.59779	5.35525	7.07438	5.39954	5.17781	8.06203	8.35968	6.84565	7.41589	5.09978	5.18056	5.31084	5.7549	8.12564	6.2307	9.27759	8.05953	6.39194
ENSG00000166391	15.8063	16.026	9.76883	18.5873	11.4546	18.5913	8.28522	18.6098	5.62136	17.7798	8.72073	18.706	15.4746	18.3951	11.6893	16.0012	12.2151	16.6057	14.8532	17.7108	12.3185	17.5501	13.1168	18.6588	12.019	17.6115	10.1605	17.1779	13.8914	17.1237	12.1986	17.8135	14.516	16.4781	4.73628	17.6817	16.6931	18.314	13.2609	16.8406	14.3106	16.673	13.6669	14.1742	16.8011	17.1036
ENSG00000070087	13.6859	16.0416	14.5097	15.125	16.8551	15.8937	18.1113	15.8794	16.25	16.5193	15.7057	15.2011	16.5816	14.6412	16.4987	17.0648	17.4817	16.8956	13.5759	15.1351	15.0692	16.4762	12.6418	15.6469	14.2534	16.3374	17.9417	16.2733	16.4606	15.3755	14.1309	15.2642	15.8396	17.0277	9.39546	15.3796	17.8636	15.3949	13.3389	14.9561	16.2151	15.6671	15.5604	17.2228	15.3483	15.9443
ENSG00000280038	4.84786	7.16608	5.71449	5.8287	4.15262	4.84174	4.6861	5.17184	4.76752	6.71183	6.73968	4.2946	4.9892	7.41242	5.08339	6.51329	5.31956	6.25708	4.90174	5.11797	5.02604	5.83865	6.13834	5.96368	5.65328	4.97257	3.57219	5.52365	4.27445	5.47164	5.2623	6.34474	4.60415	4.17762	4.73628	6.56741	4.82376	5.3679	4.3327	5.31084	5.57828	7.89897	5.5926	8.78295	4.97294	6.79907
ENSG00000153561	17.3721	17.9498	16.5721	17.9894	17.5891	18.5528	18.7858	18.5665	18.345	17.844	17.7112	18.9115	17.6484	17.7083	15.9672	16.4906	17.9008	17.413	16.3586	17.5863	17.0881	17.4676	16.968	17.9633	16.5835	17.6051	16.8541	17.7418	16.8607	17.1946	16.6927	17.7779	17.2572	16.7802	16.1822	17.0884	16.4419	17.4614	16.6967	16.4337	17.3432	16.3001	16.9541	17.2605	17.3875	16.965
ENSG00000269148	4.59146	4.47053	2.63498	3.34349	5.3493	3.34388	6.41345	4.43387	3.68188	2.63498	7.8942	3.62721	2.63498	4.8514	5.05826	2.63498	4.60682	3.72101	4.90174	3.68945	4.22599	3.95451	4.50015	4.25365	5.37375	4.32702	3.93898	3.54413	4.59779	2.63498	5.2623	5.09041	4.60415	3.55309	2.63498	5.30715	4.56941	4.37756	5.3063	4.43938	4.34571	3.79955	3.94625	3.61094	4.248	4.59137
ENSG00000179262	18.1944	17.7582	18.2266	17.5821	18.4579	17.4989	16.507	16.7762	18.5528	17.415	17.5798	17.234	18.7767	17.4463	17.6528	17.7937	18.1583	17.7184	18.5825	17.322	18.2554	17.6974	18.1714	17.6889	18.4192	17.5341	18.5886	17.8655	18.1775	17.6423	19.0486	17.0538	17.6106	17.6345	18.376	17.8525	18.4081	17.5361	18.6043	18.0263	18.3087	17.6888	17.7711	18.336	18.3379	17.8528
ENSG00000104833	4.78836	12.4943	4.44526	8.026	5.85254	9.75097	4.06166	10.0911	5.40133	12.966	5.0035	10.7766	7.99623	9.33944	5.94388	11.8628	4.92482	13.1413	5.82282	9.62459	3.72417	9.92493	2.63498	7.78429	5.02261	7.69965	2.63498	12.7263	2.63498	10.1399	4.39405	7.56603	5.05591	9.02869	4.18069	13.4246	3.47336	11.2847	6.18897	10.8326	6.1057	12.5789	5.01307	14.3812	11.4413	10.6453
ENSG00000006695	13.8841	14.8767	14.4999	15.2645	15.8732	15.207	13.1416	15.1648	14.5631	14.3235	14.3087	14.5867	13.8609	15.2145	13.6033	14.6753	14.077	14.3649	14.2249	14.8381	13.2222	15.0224	12.6643	14.8572	13.427	14.7667	15.0427	15.181	13.7737	15.0305	14.2483	14.7757	15.5613	15.6586	14.1816	14.587	14.6049	15.2616	14.0813	15.4446	14.0997	14.61	13.7527	15.0496	14.5074	14.6944
ENSG00000258630	3.81956	4.71537	3.41397	6.42806	2.63498	6.7092	4.47324	7.3251	3.68188	6.42946	3.73535	6.77952	3.39984	6.16553	2.63498	3.49983	3.59405	4.78812	3.87685	6.87067	3.9544	4.68799	4.90674	5.6639	3.4298	5.16196	4.52103	5.94278	4.27445	6.2129	3.38979	6.9774	3.59261	4.73238	3.9158	6.63928	4.05019	6.14237	4.3327	4.13738	3.94867	5.61522	3.7173	3.99118	7.60359	6.78995
ENSG00000187513	11.5852	11.4772	12.5011	9.54608	11.4395	10.2296	9.65755	9.05241	11.3528	10.9112	8.85087	10.1036	10.7896	10.1738	13.567	11.4805	11.6412	11.7192	12.5239	11.0567	11.2538	10.4805	11.7444	11.2276	12.5161	11.0176	12.4945	10.9093	10.7603	12.1293	11.2387	11.4757	10.6056	10.8986	12.11	12.2708	9.67245	13.2573	12.6831	10.8557	11.9431	13.2109	13.4186	12.099	13.4357	10.7291
ENSG00000095587	8.03609	8.45343	6.67293	7.18885	9.77753	7.02186	6.28146	7.0538	7.33698	8.23936	9.13501	4.62097	6.0123	7.04353	6.79485	8.5086	8.64761	8.74564	7.52607	8.61848	5.95213	7.44813	7.12104	8.45383	5.88614	8.96388	10.4169	8.03412	5.51682	7.61856	6.51014	8.26412	6.98164	5.54599	7.6745	7.20213	7.08949	8.40653	7.97555	7.18987	7.60642	9.11056	8.07964	9.65054	10.2718	7.66609
ENSG00000167700	14.04	12.9749	13.7158	14.7245	11.8489	14.8648	12.4394	14.029	14.9213	12.6969	13.9486	14.5229	15.2018	14.6428	13.4057	13.163	12.4269	12.9491	13.7219	13.6429	13.2797	13.5703	15.7529	14.5197	15.4555	14.0414	17.7304	14.4218	15.2123	14.1627	14.3159	14.1955	15.2464	14.4244	14.3763	14.3052	15.3968	14.6973	15.2857	14.5235	13.8347	13.4418	14.9574	11.8396	14.4343	13.689
ENSG00000265096	5.77869	6.64536	4.68761	6.90521	4.7489	5.72824	6.52134	4.78045	8.82378	6.52383	6.18124	6.30679	5.53739	6.51649	4.0815	4.88339	5.05899	5.54367	7.32765	5.63823	6.33299	5.71499	5.40198	7.81242	6.38375	5.32813	3.93898	4.71427	4.85479	4.36832	4.39405	7.24615	8.48359	7.40599	8.06802	4.33331	3.47336	4.61308	8.65681	3.5278	3.71934	2.63498	5.69975	4.26906	3.82749	3.58571
ENSG00000064601	21.2038	20.2857	19.3116	21.6675	19.2359	21.9475	18.5565	21.3399	20.6762	20.8207	17.8937	22.168	20.2324	20.8291	18.7689	19.1761	19.8709	20.1402	20.372	20.4044	18.6022	20.1795	20.1009	21.0539	18.8415	19.9253	18.5657	21.0913	21.1578	20.0985	19.541	20.9328	18.9778	20.1924	19.7989	20.3928	17.9467	20.7145	19.3679	20.484	20.3599	19.0371	20.7215	18.7981	18.7844	18.9109
ENSG00000227766	11.1055	11.8235	8.39667	8.69195	12.8916	13.4597	10.9815	12.0677	12.0772	12.0237	5.24611	6.87679	5.22123	6.92602	9.68124	11.2245	6.56376	5.7586	11.7181	12.6055	10.2902	11.6192	6.92237	8.08259	7.97746	7.1376	8.26145	9.66243	7.0987	6.97412	13.506	13.44	6.10094	5.37195	9.73108	11.4447	6.33957	6.35373	11.2849	10.4675	5.28599	6.49123	10.1393	9.28444	10.8877	9.84094
ENSG00000008517	20.2457	19.2711	19.6939	19.4889	19.6273	19.6687	19.0744	19.4299	19.7261	18.9912	18.63	20.9117	20.4913	18.9045	18.7117	20.2162	18.4472	18.9507	19.8823	18.3975	18.1224	18.9998	18.8064	19.3538	19.3306	18.1217	20.9735	19.228	20.5767	18.4922	19.7893	18.9189	20.1537	20.0756	18.5256	18.7358	16.0235	17.9031	19.6747	17.8187	19.8223	17.8852	20.4432	16.9705	18.4662	17.2805
ENSG00000229637	7.5734	9.64362	7.79388	5.36788	9.98477	2.63498	6.01152	2.63498	7.33698	8.93695	9.2652	3.62721	6.45846	12.3618	5.05826	11.2876	3.31927	4.4406	8.24938	11.2849	11.5231	11.5351	11.0504	12.036	9.65827	11.611	9.02622	2.63498	5.69578	11.0655	5.50766	11.7774	7.19274	3.55309	10.865	3.86852	8.86566	3.38205	6.41081	2.63498	3.52706	9.46037	5.82311	2.63498	9.67232	11.1814
ENSG00000227896	6.73017	5.94423	6.15496	6.77999	6.89742	5.92495	7.45968	6.75625	7.28253	5.70796	9.39684	5.54659	5.672	5.3392	7.99676	5.82246	7.39323	5.35747	7.83547	6.34563	7.44791	5.18681	6.5143	6.09265	7.08626	6.22191	6.16213	6.73324	8.03408	4.36832	7.3065	6.41377	6.6133	4.17762	5.0057	6.63928	7.70434	6.14237	6.77199	5.48268	8.01497	6.22733	7.53369	6.73538	6.22468	6.31757
ENSG00000070081	15.0321	15.7069	15.0432	14.7622	15.0253	15.8155	14.8928	15.7052	14.6549	15.9449	16.5522	14.9135	15.4881	15.2722	15.6677	17.1646	14.7786	16.056	15.4601	16.2046	14.7825	16.1582	14.1532	16.2706	13.8835	16.6425	16.8312	15.5215	14.7223	16.7015	14.0373	15.1716	15.6563	15.5019	16.6479	15.0509	17.2235	16.2311	14.9325	15.5903	14.4852	16.9086	15.7019	16.1932	16.8245	16.8856
ENSG00000112309	7.4869	7.91888	6.79889	7.64555	6.94732	7.89927	10.7666	9.70656	5.71959	7.91807	8.86267	9.4416	6.55804	7.76288	8.54993	7.12714	7.74916	6.89594	7.99629	7.82306	7.60761	6.63343	7.90433	7.876	8.38476	5.57798	7.772	8.56776	8.55718	6.86348	7.5672	9.96119	7.29424	7.01348	4.48957	9.08069	7.85993	8.94192	7.05148	10.0003	7.40699	7.23853	6.53286	8.55837	5.4878	8.10051
ENSG00000158480	15.3686	15.0639	15.4417	16.1412	15.4094	15.524	15.0021	15.7052	16.383	15.0125	14.9066	15.8555	17.1226	16.4132	15.6158	14.363	16.5368	14.5546	16.0323	15.6419	15.2341	15.2539	16.164	15.7216	15.1509	15.4757	14.7918	15.0046	16.8009	15.4562	16.801	16.0068	14.6854	14.7007	16.3078	15.2223	16.0245	15.1721	16.2464	15.6833	16.6718	14.7659	16.1812	14.1683	16.4687	15.9173
ENSG00000196167	8.83732	11.639	11.2352	13.4146	9.47227	14.1647	11.6059	14.0925	8.74265	12.4847	11.8152	13.2774	6.84362	11.7531	8.37663	10.3924	8.7466	12.4757	16.0838	13.0259	9.47963	10.0703	11.6544	11.2031	11.3821	11.0606	12.8572	12.2143	8.14441	10.8291	7.3065	12.0221	18.1844	12.5688	17.5682	11.9497	19.4588	12.9744	10.6373	13.0684	8.51318	12.4173	9.78523	13.0485	13.4407	11.0732
ENSG00000179833	14.5395	15.8623	14.9266	15.1165	14.7319	15.1386	15.0376	15.4262	13.9755	15.2484	16.5068	16.1907	15.2377	15.7186	14.9317	14.8415	14.7388	14.9256	14.0084	15.4808	15.4314	14.6363	13.97	14.6155	14.2621	14.8583	14.85	15.3124	14.2352	15.7682	14.8184	14.9436	14.9976	13.57	14.4694	15.056	14.3983	15.4822	15.1122	16.4523	14.338	15.2406	14.704	15.8441	14.7228	15.2464
ENSG00000165312	13.6859	14.2053	12.5821	14.7434	13.9481	14.3367	13.5163	15.2657	13.5612	14.629	13.845	14.8026	13.0762	15.5298	13.7357	13.275	12.6421	13.9286	13.1271	14.1117	13.2866	13.3942	12.7845	14.017	13.9645	13.7923	12.6062	15.0746	12.555	14.0918	13.8899	14.041	13.8964	13.8422	13.1625	13.7647	17.3122	13.4808	13.0385	14.609	13.1293	13.8609	13.2202	13.5025	12.8044	13.8749
ENSG00000159618	10.5447	9.62041	12.198	12.6903	13.2669	11.3557	10.3633	11.6079	10.2429	10.3412	12.8738	11.2328	13.5271	11.8285	11.6428	10.9596	12.3148	10.2622	10.795	13.7627	12.9504	11.1815	12.1796	11.3349	13.3754	11.0498	9.12424	11.3423	11.2681	12.1511	14.7085	11.8132	10.9808	10.8986	9.98654	11.5694	7.29208	11.2423	12.7154	11.4511	11.6019	11.3922	11.5466	6.26458	10.9329	9.94387
ENSG00000064225	10.5447	10.4457	10.2331	8.57247	10.2002	9.98137	8.55534	10.058	8.84806	10.8372	8.45047	9.04238	8.04588	9.42835	10.3973	12.0261	9.70873	11.5414	8.70357	9.50398	8.1925	10.8549	8.6526	9.53908	9.49002	10.9732	9.44963	11.1773	8.34916	9.97718	8.55746	11.0116	8.10636	11.076	8.22121	9.29716	4.82376	8.89881	10.1554	9.10701	9.05225	10.7065	10.3962	11.3064	9.05485	9.16085
ENSG00000250571	12.6165	11.6528	12.2025	12.3882	11.8857	12.1011	9.64574	11.8165	12.4286	11.7857	11.0607	12.7661	13.7818	13.4227	11.9685	11.4351	10.7079	12.3095	12.6051	12.2826	12.6573	12.9461	13.7711	12.7552	14.2508	12.554	12.7957	12.3753	12.6259	12.1755	12.4687	13.4207	14.548	11.9857	13.4316	12.993	12.4482	12.2444	13.2693	12.772	11.5388	11.9798	12.2125	12.4414	11.6273	11.4021
ENSG00000057294	17.4083	18.6761	18.2367	19.3756	17.6067	19.4478	17.8785	19.6366	17.7788	18.1639	19.5964	19.5656	17.8129	19.023	16.7868	18.5036	16.4407	18.2275	17.9861	18.6857	18.4925	18.7515	16.4786	18.7767	17.6545	18.5537	18.3735	18.653	18.1345	19.3438	18.7107	19.079	19.3773	19.4671	17.7567	18.5506	17.5325	18.8536	18.6051	20.4317	17.3665	17.9093	17.1773	15.2053	15.4781	19.1246
ENSG00000134709	15.6474	15.1078	15.1834	16.1749	14.3517	16.7432	17.767	16.5885	15.3036	15.7467	16.2282	16.62	16.0713	15.7051	16.1883	14.9729	16.7213	15.2614	16.5983	16.4415	16.6817	15.9893	14.9373	16.4189	15.9406	16.431	15.7997	15.53	16.0756	16.5994	16.4393	16.7287	17.1217	15.8457	16.3266	15.6026	16.1526	16.2712	15.7693	16.0874	15.9645	14.8017	15.2235	12.2408	14.6188	16.639
ENSG00000171861	12.7941	13.2338	14.2089	13.7968	15.3363	13.3924	12.6886	12.9583	14.1387	13.3448	13.9603	12.8889	12.9616	13.4343	12.4493	13.8051	11.8942	13.7345	12.6268	13.2707	12.8917	13.9008	13.0553	13.655	13.2948	13.4557	15.1669	13.3197	12.6324	13.6368	13.679	13.0441	14.5252	14.4786	14.4549	13.8655	13.9114	13.4779	13.3798	14.5324	12.4787	13.1842	12.708	13.6966	14.214	13.3325
ENSG00000167768	6.37179	7.8803	6.05702	9.6663	4.15262	8.38552	3.53024	5.79784	3.68188	8.87058	3.42225	8.38673	2.63498	5.3392	3.49286	5.24233	2.63498	4.78812	4.57632	7.50925	6.50585	10.2068	4.50015	7.16717	3.4298	5.16196	7.24779	9.75686	7.79402	11.1996	3.69094	8.71551	6.17422	7.48153	2.63498	4.71316	4.05019	7.22181	4.12451	5.89884	3.94867	6.00351	5.01307	3.61094	4.88032	7.74821
ENSG00000232216	10.0555	12.1495	6.33265	12.0937	10.5069	14.2224	6.0482	13.2151	3.68188	9.48433	8.80267	11.9347	3.93128	13.0433	12.37	9.54533	7.14692	11.3323	6.34484	11.5135	4.68784	10.0864	7.53858	10.3641	10.9024	10.9172	3.57219	9.49411	10.1104	13.2564	4.63125	13.7275	11.5992	13.1665	6.5795	7.90098	2.63498	10.8361	10.6482	12.5846	7.82122	11.5506	7.91413	4.59158	9.50553	8.54338
ENSG00000177981	14.6187	15.6964	14.3972	15.441	14.2701	15.673	13.978	15.7686	15.7293	15.5051	14.2255	15.6883	14.6636	15.1838	14.2488	15.7561	14.2729	15.8026	14.4446	15.3667	14.4113	15.7846	15.2442	15.6366	13.9817	15.3854	13.9035	15.5144	14.241	15.3397	14.2627	15.26	14.2212	15.8897	15.5038	15.0766	14.1124	15.2335	14.2036	15.0728	14.6108	15.3526	14.5764	16.2834	14.9233	14.9978
ENSG00000275367	5.20319	8.46911	5.18636	5.12981	5.22233	5.49938	5.79073	5.47516	4.61574	7.45705	5.45206	5.88598	3.93128	6.06746	6.00929	6.9502	4.92482	7.68602	6.0904	5.76034	7.35269	6.89281	5.40198	5.28178	5.37375	4.81051	2.63498	5.94278	3.99579	5.12434	5.39042	5.39954	4.04156	5.00146	3.55502	6.70772	3.47336	5.3679	4.39463	6.50121	5.26254	7.79171	5.62016	9.88712	6.57147	6.46262
ENSG00000022567	15.1216	15.2777	13.694	16.0954	14.3647	15.4949	13.6818	14.8758	15.091	14.3212	15.1921	15.7339	15.2377	14.9316	14.5316	14.0442	14.2764	14.2193	15.5245	15.0011	15.3758	14.1155	15.2112	14.7478	16.6003	14.4793	15.6696	15.1608	15.4966	15.2676	15.3826	15.1489	16.7454	14.3974	14.2174	14.7341	16.1272	15.0137	15.092	15.6705	15.4053	15.3044	15.0131	14.0117	13.3426	13.6433
ENSG00000120662	12.2823	11.1323	13.306	11.9248	12.552	11.9869	12.0942	12.2559	14.0336	11.6085	11.819	11.916	12.4952	12.2822	12.1532	12.2047	12.8845	11.2196	13.2394	11.9063	11.6696	12.4425	12.0882	12.3503	14.3688	12.0524	13.2085	11.8633	13.7848	11.8066	12.4659	12.5458	12.6787	12.9732	12.0799	11.8705	11.3973	11.6381	12.7778	11.6289	12.9223	11.4105	13.0972	11.2576	10.3458	11.8354
ENSG00000225630	18.3467	19.7378	17.6673	17.8628	16.8377	19.3086	21.3076	19.4641	16.2029	19.2458	17.9529	19.2244	17.7888	18.0248	8.6386	8.60124	20.016	16.8637	20.4053	18.2414	17.964	15.9307	18.5398	18.0712	18.6185	16.889	19.213	21.649	18.7631	17.4523	17.8609	18.982	17.9458	15.8101	20.7666	20.1326	19.181	19.1016	17.8739	19.105	19.3113	18.2972	18.8862	19.555	16.9958	18.6179
ENSG00000164283	10.5722	5.6791	14.3657	3.34349	12.175	5.49938	12.6734	4.78045	10.8809	5.57168	11.0349	4.62097	9.2318	3.41729	12.8737	4.09267	12.7381	2.63498	11.4105	4.17759	11.4397	4.22611	10.6273	3.97802	8.86044	3.7971	13.0926	3.90107	12.4949	5.83774	13.3964	4.49829	10.5445	3.91319	11.3454	5.30715	9.12459	3.68032	12.3468	2.63498	10.2401	4.56103	12.4775	5.3037	13.2883	4.44914
ENSG00000013392	12.1434	11.1902	12.3757	10.3863	12.457	11.3259	11.5284	11.0682	12.4681	11.2789	12.712	10.6033	11.328	10.8346	12.0011	12.9375	11.4954	12.0939	11.9382	11.1024	10.9799	12.5733	11.5528	11.9083	12.1652	12.3716	13.9859	11.0838	12.4815	11.2338	11.5322	11.4422	12.3236	12.9335	11.5789	10.6385	11.5903	11.2084	10.8812	10.2033	11.8255	11.8497	11.7359	12.4155	12.4801	10.6528
ENSG00000226688	9.63902	9.40372	7.19655	7.71548	8.62789	7.24969	11.0175	8.00269	9.41564	7.77253	11.3192	8.68341	9.66242	9.52865	9.25816	9.70294	9.822	9.29576	9.8924	9.15912	8.43624	8.44803	8.88848	8.62742	8.5942	9.59762	9.69383	7.65942	9.00846	8.50143	10.3678	9.02351	9.33728	8.96251	9.52904	8.69201	8.45544	7.64085	9.83074	8.51556	9.30385	8.77637	9.90721	9.37705	11.3574	8.87528
ENSG00000184178	13.8931	13.208	13.5402	13.6281	13.6287	13.6248	15.571	13.1102	14.0203	13.3257	13.3315	13.338	13.5617	13.5822	13.652	13.5653	13.5652	13.5249	14.4324	13.6528	14.4764	12.5113	14.0804	12.9249	13.2464	12.9877	13.6241	13.4543	14.1081	14.5821	15.2934	12.7945	12.9978	13.4874	13.8225	13.4934	13.1155	13.3601	14.1102	13.9912	14.272	13.5483	13.9832	13.3158	15.1409	14.7087
ENSG00000164112	3.48403	7.82449	3.95424	4.52178	7.07845	6.7092	3.36977	5.79784	4.167	7.32745	4.1575	5.72652	4.19886	5.19529	5.05826	10.197	3.59405	8.147	4.34424	5.11797	4.44548	7.59404	3.44009	4.57383	4.47858	4.04079	4.52103	7.08523	3.61437	6.128	4.39405	4.90459	3.59261	6.75929	3.55502	6.97148	3.47336	5.59223	5.18056	6.04148	3.71934	8.03451	4.83125	8.477	4.97294	6.15606
ENSG00000130204	17.3264	16.7137	16.8874	16.5691	16.8266	16.6788	17.8651	15.8559	16.797	15.6482	16.8103	16.0782	18.5183	16.7082	16.3405	16.4658	17.4368	15.7805	17.316	16.562	17.4116	16.3888	17.5079	16.2817	16.546	15.8295	17.8439	16.5627	17.8411	17.6249	17.799	15.9769	17.5304	17.7112	17.8434	17.2378	16.6657	16.2364	17.768	17.6271	17.4476	16.5002	17.5845	15.7472	16.5091	17.3178
ENSG00000111863	12.4634	14.9547	13.4742	18.0208	8.84826	18.7635	7.24908	19.4106	9.18945	17.2184	11.3851	18.3585	7.44987	18.3986	9.31946	16.7803	9.46309	17.7187	12.5414	15.9497	11.8164	16.6728	13.7996	17.3653	12.4607	17.6366	9.18943	15.8629	13.8031	18.2166	10.6522	16.54	14.9169	18.7806	9.42319	16.9013	12.4706	16.5709	15.0971	17.2992	9.31916	15.5327	14.6221	14.294	7.70809	17.0753
ENSG00000109618	12.846	12.6457	13.5195	14.5381	12.9382	14.6427	13.6944	15.3223	14.9683	13.8765	13.7214	14.8916	12.3978	13.7093	12.4706	13.5585	13.5505	14.1353	14.0383	13.8714	13.2866	13.9377	14.037	14.1887	13.8208	14.1067	14.4931	13.8129	12.7852	13.303	13.0337	14.4739	14.4185	14.3167	15.2775	13.9175	12.8637	14.151	13.1218	13.1042	13.6747	13.2223	13.6998	12.9112	12.6821	13.1267
ENSG00000153015	13.4592	14.1674	13.5812	13.5058	12.9996	13.6908	14.0742	14.1259	14.9157	14.4342	14.4323	13.6689	14.7842	13.6196	14.1714	14.4153	14.458	14.4188	14.7012	14.088	13.8955	14.2853	13.8799	13.8715	13.8021	13.677	12.8769	13.9384	13.6842	13.9831	14.4533	13.1989	14.425	14.1868	15.4581	13.9242	13.6946	13.7593	14.4951	14.1036	14.0397	14.0881	14.3569	14.9318	13.449	14.4912
ENSG00000260549	9.5352	11.8149	8.96675	10.5334	6.20607	11.1866	4.91049	9.81162	7.44007	9.85692	6.02059	10.7032	6.45846	9.83397	9.08569	11.4984	7.19687	9.24841	6.34484	9.79483	10.5561	12.065	6.41661	10.5578	7.503	11.2929	6.29363	8.97111	5.69578	10.3784	5.64154	10.4684	5.05591	8.25876	6.11591	7.59955	3.80505	7.33284	7.35791	8.91848	7.48814	11.6498	8.07964	10.0325	8.52308	8.81607
ENSG00000278616	7.20193	9.95322	8.33582	8.67046	7.96539	8.89018	7.61331	8.16328	7.37465	8.70001	8.79036	8.90656	7.02328	9.58248	9.12129	9.02729	6.94452	7.74928	9.46289	8.69295	8.45162	8.67471	7.47554	7.19596	8.25376	8.8488	7.62087	9.0073	5.99707	8.01595	10.2767	9.55494	10.0056	8.37642	6.9597	9.57174	8.95932	9.43807	4.39463	5.95764	8.43355	9.95231	5.91456	10.1308	7.96106	9.37045
ENSG00000036448	8.03609	11.7022	6.67293	6.34866	11.0872	10.6927	8.61413	8.28254	9.57764	11.4738	8.14685	9.53371	8.27134	9.57364	8.2749	10.0388	9.20566	12.2675	8.07262	9.6544	7.55157	9.16927	8.45041	8.90492	6.64406	8.0284	9.95683	11.3208	8.44465	9.32037	10.4127	8.92111	7.80571	7.79238	2.63498	6.9051	6.01532	8.43876	8.6278	11.4706	7.28169	8.12564	9.33352	14.3883	9.63205	10.7753
ENSG00000164114	12.1758	13.2246	10.1764	9.26526	8.60015	9.14347	10.9821	9.95811	13.7531	12.4151	8.56328	10.0814	12.0401	9.93673	12.4173	13.1588	9.81403	12.9618	9.7245	10.2785	8.01229	10.887	11.5446	9.3378	8.52013	10.2643	7.89237	11.4947	7.03455	10.0373	8.92846	9.94968	8.15389	10.3036	6.8656	11.8162	5.17659	11.2001	12.1479	13.2658	9.36949	12.5681	11.2435	14.5374	11.3458	11.952
ENSG00000106038	6.90076	6.0602	12.9335	6.50327	10.1308	6.26598	6.704	4.78045	10.4233	7.90416	6.66048	7.88793	8.96651	7.51206	7.26247	5.04906	2.63498	4.78812	11.205	9.54308	14.3107	6.50606	14.5791	8.94357	14.8707	8.32491	3.93898	5.35038	13.8235	5.79411	5.50766	9.05877	5.83718	2.63498	2.63498	5.88786	9.85326	6.14237	13.6064	7.18987	4.24567	4.33039	3.94625	5.06239	6.75328	6.08295
ENSG00000149089	13.9567	13.7999	14.7892	13.8451	13.0197	14.0985	14.4544	15.0247	14.0518	14.3093	13.7866	14.73	15.8288	14.0139	15.4922	16.8653	15.9344	14.3209	14.3586	14.3034	16.6847	14.51	14.1359	14.7348	13.4693	13.9479	14.7292	14.4405	14.7838	15.4757	15.5703	13.4223	15.5587	15.6162	13.5499	13.7143	16.2352	14.602	14.128	13.4681	17.0186	15.4092	14.6418	13.6486	12.9948	14.4143
ENSG00000114861	16.2582	17.7834	15.729	16.6882	16.2028	16.7963	17.1584	16.7313	16.0451	17.6258	18.2421	16.7445	16.8228	17.1486	16.3794	16.2411	16.9035	17.0208	16.4924	17.1301	16.3101	16.3967	16.0111	16.5298	14.0159	17.0908	16.1359	16.7327	15.6329	16.1535	14.9816	16.7624	17.5212	15.7264	17.6441	16.7987	17.804	17.1264	16.1464	16.9494	16.315	17.2952	16.3488	18.2214	17.6824	16.7603
ENSG00000179632	17.8659	18.2156	17.771	17.6385	17.6674	17.6282	16.3477	17.1466	18.4711	18.2032	16.7184	17.0827	18.7408	17.5203	16.5068	18.008	15.6536	18.4178	17.6586	17.2278	17.2642	18.2803	19.1023	17.7487	18.5701	17.7993	18.2536	18.2157	17.3906	17.6249	17.4892	16.9948	17.6474	17.5489	18.0678	17.7704	17.8189	17.4181	17.4259	17.4781	17.1962	18.068	17.6503	19.3477	17.4283	17.4194
ENSG00000113971	12.4541	13.3567	12.9917	12.9933	13.2876	12.7951	13.6008	13.7043	12.0317	12.7694	13.6443	12.869	12.0823	13.568	13.8675	12.8501	12.7079	12.6448	13.5393	12.9713	12.2179	12.5805	12.5272	12.5008	13.5708	13.6583	11.8745	13.3988	13.3217	12.0108	12.194	14.5383	13.7905	14.1918	9.90827	13.7502	13.3165	13.7641	11.8069	12.487	12.7609	13.3338	12.9408	13.896	12.1199	13.199
ENSG00000138193	15.0836	17.3483	12.4218	18.0723	13.2064	18.1412	14.813	18.0946	11.897	17.0163	15.6413	18.5749	14.8542	17.9778	14.2859	15.2991	13.6901	16.4164	14.4879	17.3317	15.2156	16.4674	14.662	16.9458	12.8842	17.1628	14.3286	17.433	14.8131	16.9336	15.0633	17.8791	15.6402	16.5515	13.3138	17.4282	14.4729	18.0367	14.4577	18.1548	14.212	15.9321	14.981	15.6254	12.7057	17.669
ENSG00000240809	6.83213	6.89859	6.09701	7.12697	5.62347	6.28034	5.23821	7.44369	5.40133	6.62942	7.15972	6.79951	6.44365	6.99131	6.64749	7.8857	5.44542	7.63332	7.28294	7.30258	6.28196	7.62831	5.98713	6.93062	6.46536	7.04751	7.29851	6.54836	5.89148	6.84241	5.9802	6.32695	6.05508	7.39486	5.37659	6.34164	5.62635	6.79261	6.43795	6.75281	6.27628	6.32728	6.42883	6.49576	6.09538	7.20066
ENSG00000152942	13.7172	14.1462	14.2035	14.2932	13.4948	14.3989	14.3093	14.7883	14.768	14.2415	13.8297	14.4161	14.3005	14.3613	14.2195	14.1212	13.739	14.3067	14.3621	14.7078	13.9595	14.5288	13.9195	14.6135	14.4671	14.5048	13.8746	14.3861	13.8818	14.0903	14.3029	14.4354	14.8827	14.4609	15.5902	14.0581	14.6117	14.1941	13.6781	14.0565	14.2897	14.0358	14.0207	14.7192	13.412	14.0228
ENSG00000158411	12.7458	11.9615	13.6502	12.7324	14.4141	13.1316	13.84	13.5429	14.2313	13.3747	13.9593	13.1045	13.5843	12.8867	14.0967	14.2263	13.8697	13.3239	13.4555	13.1889	13.4475	13.3033	12.3669	13.7696	14.2512	13.1207	14.038	12.7701	14.6174	13.373	13.2311	13.3803	13.3433	13.8365	12.5388	13.0507	13.1907	12.7992	14.0419	12.7909	13.6636	12.9513	13.6492	12.6966	12.8684	12.9508
ENSG00000172667	14.8013	15.3189	14.8494	14.514	14.3141	14.7451	15.7637	14.6644	14.1555	15.0827	15.8809	14.9475	13.9808	13.7766	15.2425	14.3676	14.1168	14.9619	15.0545	14.2625	13.6074	14.1466	13.494	13.715	13.7118	13.7691	16.7547	14.4648	13.6728	14.465	14.6955	14.1313	14.3498	13.6985	14.6017	14.5596	13.6915	14.5587	13.7346	14.3092	14.3138	14.6276	15.96	16.394	14.8135	13.9279
ENSG00000118363	17.1791	16.6327	16.9512	17.1636	16.6732	17.2977	16.1934	17.599	18.0349	17.3656	16.7368	16.8331	17.824	16.5338	17.0398	18.0818	16.7696	17.1095	16.8502	17.1388	16.8896	17.2228	16.9949	17.4134	16.2248	17.0607	18.2467	17.2223	17.4115	17.9917	16.5483	16.743	16.767	17.883	18.0715	16.7394	17.6394	16.9125	17.1852	17.4125	17.257	16.8801	17.4828	16.7958	17.6072	17.3491
ENSG00000273311	8.73979	9.546	8.7129	9.18418	7.65361	9.58266	9.2547	8.99925	7.58848	8.99713	11.5428	10.2718	8.37598	8.66649	9.92144	9.42257	8.62176	8.44315	8.03272	8.97494	8.62445	9.35251	9.55436	8.71443	7.21412	7.39661	10.5018	9.30644	10.2116	9.80328	9.46973	9.1114	9.99259	9.62147	8.57274	8.39042	8.60286	8.92433	10.5945	10.8557	8.36008	8.58897	9.1734	8.85833	8.45391	8.95265
ENSG00000136169	13.5574	13.3821	13.5224	13.3869	13.0032	13.4352	14.1708	13.6319	14.9413	13.6991	12.1365	13.031	13.7154	13.5675	13.9564	13.4142	13.8251	13.4716	13.6693	13.6852	13.8065	13.6643	14.1532	13.6776	15.1897	13.8822	12.6886	13.1801	13.3713	13.0709	14.1159	13.9414	13.3912	13.5366	13.4512	13.3014	13.2215	13.4109	14.0711	12.9048	14.4526	13.5385	13.9714	13.5957	12.6485	12.9085
ENSG00000121644	16.0539	15.9486	16.2687	15.7344	16.3108	16.6096	17.5815	16.4524	16.6203	15.9921	16.1891	15.8555	16.7405	15.7834	16.7343	16.0866	16.36	16.1258	16.3746	15.8759	16.7341	15.8479	16.6158	16.1017	16.2278	15.8976	16.5075	15.6133	16.9222	16.1636	16.6765	15.9031	16.2	15.7781	16.6029	15.5195	15.7732	16.1196	16.443	15.7315	15.8139	15.7318	16.023	16.1575	15.7772	15.9897
ENSG00000279700	6.04632	5.35169	5.32998	4.99306	6.03102	4.52272	8.35945	5.47516	3.68188	3.50335	8.9811	6.44042	3.70469	6.25726	6.13169	2.63498	5.53847	4.13843	5.69053	4.62871	4.68784	4.22611	4.90674	3.60116	6.94591	5.47636	3.93898	4.46952	5.31135	4.60289	5.39042	5.53145	7.241	2.63498	4.18069	5.78516	7.29208	5.09978	5.42148	5.31084	5.48082	4.97686	4.43487	5.98843	4.248	5.81984
ENSG00000205362	8.45571	11.5837	9.92431	10.8942	3.6716	11.1627	5.30141	9.73472	9.54006	10.2425	12.2537	11.4374	6.38282	10.2478	7.12871	11.097	7.43543	8.27285	5.69053	9.61824	11.8097	11.0392	4.27534	10.927	8.41369	11.4131	2.63498	5.35038	3.99579	11.4327	4.78388	9.88011	4.60415	11.62	3.55502	9.25601	6.33957	7.22181	8.01195	9.25353	5.37599	7.69083	4.67618	5.12686	5.37274	11.2339
ENSG00000138495	13.9596	14.4421	15.1509	14.9685	15.0639	15.1095	14.9094	14.557	15.7602	14.9423	14.6059	15.1323	14.6358	14.7164	13.8139	15.887	14.3692	15.129	15.5495	14.6881	14.6324	15.2413	15.5008	15.5034	13.7642	14.6331	14.95	14.3787	13.8775	15.3082	15.3342	14.8844	14.0954	15.7192	15.4021	14.3058	14.7602	13.9207	14.6006	14.5257	15.0639	14.4989	15.0025	14.5981	15.2743	14.9354
ENSG00000169992	13.9127	15.4288	13.0383	12.5331	14.506	12.5137	10.7909	12.5781	12.9344	14.6372	13.8353	12.6395	13.5927	13.1428	15.0899	13.8907	13.6085	14.7814	13.4215	12.715	13.3262	12.5451	11.9269	11.6058	12.7554	12.509	11.5258	14.7939	11.4991	13.4893	13.0872	12.7224	12.9916	11.1129	13.2024	14.5114	9.28288	14.8542	13.0988	13.7847	12.9985	15.3703	14.8727	17.0551	16.304	14.5741
ENSG00000127564	13.3176	11.5066	14.3468	13.1614	14.9501	13.0909	14.057	10.9828	13.416	12.0727	14.5407	11.8046	15.6156	12.6212	14.5692	12.5725	14.0142	11.6008	14.188	13.3917	15.434	12.2545	16.1714	12.7089	15.4103	11.5504	14.8701	12.7709	16.3847	14.2887	16.1724	12.1954	15.597	12.7874	16.0086	13.7808	14.5485	13.5826	15.4178	13.7406	14.7211	13.1302	15.0824	9.36741	15.1929	14.3863
ENSG00000277998	9.69212	9.64362	9.78561	11.6217	13.1952	11.9744	12.1344	11.2962	11.4334	11.9092	10.5165	10.3363	11.7378	9.27986	9.83743	10.0404	10.6303	9.62725	10.8075	8.22145	8.89583	9.37285	11.6298	9.75484	12.2177	10.2467	11.2935	8.7667	10.3129	10.9574	12.6093	10.1678	9.63515	10.1682	12.3066	10.629	11.1068	10.22	12.1169	8.17281	9.54785	8.22688	10.64	9.21086	10.8914	10.1064
ENSG00000176973	15.5703	15.5245	15.5637	14.8785	15.1194	14.6624	13.3637	14.5705	15.7929	15.2883	14.0931	14.4187	15.319	14.7025	14.5353	15.3608	14.4648	15.6801	15.2285	14.5476	14.4535	16.0229	15.3789	15.5952	14.3763	14.8003	15.2496	15.8195	14.766	14.6423	13.9326	14.5169	14.1268	15.5213	15.3154	15.3363	14.8363	14.9154	14.6453	14.7339	14.9333	15.416	15.4442	17.1363	15.3439	14.2356
ENSG00000159479	15.2924	14.9566	15.8501	15.4781	16.1617	15.2439	14.6088	15.0407	14.6549	15.1023	15.4202	15.2421	14.8907	15.5115	15.1361	15.8485	14.8869	15.1392	15.9692	15.1166	15.0291	15.655	14.975	15.6071	15.2654	15.1787	15.653	14.7388	15.5283	16.2123	14.4606	15.3357	15.4521	16.0389	15.6798	15.0417	14.6859	15.0041	15.0805	15.2804	15.1052	15.2663	14.6821	14.7462	14.8907	15.4137
ENSG00000112511	14.9269	15.9018	14.4704	14.9198	15.4448	14.7247	13.1861	14.7536	16.2194	15.611	14.4271	15.0652	14.353	15.351	15.4121	15.4998	14.3759	15.6005	15.1252	15.0644	13.0944	15.422	14.4632	15.1935	15.1241	15.7345	13.8347	15.5172	14.9877	15.0812	13.7695	15.3617	15.2882	15.2434	14.1543	15.364	16.0343	14.7259	14.4317	15.0399	14.1812	15.6601	14.6169	16.369	14.8441	14.9881
ENSG00000211950	8.084	9.36235	9.261	14.3332	11.2586	12.9613	7.73548	11.3907	2.63498	8.70403	8.9811	9.32614	2.63498	8.63627	16.4495	9.82503	8.48794	11.0213	5.56987	11.9769	5.71479	9.26162	8.48681	11.2646	9.43062	8.87518	4.2079	10.2567	8.43228	12.153	6.25322	11.6378	10.6743	12.4397	6.5795	6.77303	4.05019	12.1088	14.3698	11.2671	9.03212	12.3377	11.1622	4.26906	11.1863	8.86233
ENSG00000154511	13.762	13.8916	14.9538	13.6359	12.5495	13.6197	13.5318	13.9991	11.8948	13.7526	11.8652	13.1379	13.8331	13.2183	13.6652	14.5014	13.5594	14.9507	14.2703	13.5849	14.4308	14.3215	13.1143	13.9686	11.9942	13.8013	14.327	13.9108	13.5496	13.722	12.8628	13.7575	13.4948	13.7847	13.829	13.4792	13.3672	13.7676	13.7231	13.6661	13.0487	14.0605	13.8795	16.2543	14.3258	13.8989
ENSG00000144504	13.0074	12.2199	12.6572	12.5642	12.3492	11.9444	13.1544	12.2672	12.2456	11.185	15.4331	12.7521	12.2958	12.9309	13.5751	11.4339	13.6155	12.0749	12.9194	12.6308	12.6919	12.2624	13.2182	12.4102	13.6779	12.4578	12.7419	12.2385	13.9827	11.9206	13.8249	13.2902	13.7129	11.8925	13.3039	12.7378	13.8109	12.4246	13.3121	12.5176	12.9278	12.3318	12.5494	11.9335	13.0334	12.0547
ENSG00000142507	16.1609	16.7393	17.0883	16.6437	17.8354	16.8837	15.7377	16.4323	17.6986	16.769	16.6118	16.7201	16.7778	16.5729	15.7199	17.9909	15.6421	17.4019	16.7032	16.5457	15.6192	17.3524	16.0862	17.1641	16.1881	16.4203	18.0196	16.9056	16.2127	17.7593	16.76	16.2016	16.6731	17.7111	17.8532	16.8825	16.7038	16.3765	16.5357	16.7825	15.972	17.0118	16.4526	17.5544	17.2405	17.0472
ENSG00000164116	14.6007	17.2472	13.5164	10.5116	14.3831	12.568	15.2015	12.7127	12.7142	16.6245	12.3391	13.0258	13.4171	12.3307	14.6417	17.6623	13.9499	17.018	13.5302	11.5131	12.8907	15.2356	12.4627	11.9606	12.795	13.5515	10.434	15.8387	10.5646	14.6004	12.9074	11.7189	11.8237	12.8101	10.9446	13.9813	7.53829	14.0855	13.0042	11.9832	13.7422	16.9438	15.1075	18.5899	16.1439	15.0254
ENSG00000273305	5.20319	5.15337	3.95424	5.61722	2.63498	4.29573	7.3546	4.43387	3.90416	5.97343	3.42225	5.16157	2.63498	4.45227	4.0815	4.09267	5.42115	5.35747	6.0904	5.11797	3.72417	3.72426	4.90674	5.48595	5.62485	4.5573	2.63498	5.35038	3.61437	4.60289	5.50766	4.90459	3.31822	4.17762	2.63498	4.71316	3.47336	5.3679	4.3327	4.94572	4.9138	4.56103	5.01307	5.50883	3.82749	4.03183
ENSG00000138669	8.70958	12.2681	8.85844	13.5551	8.56869	11.799	9.72647	12.0996	8.31344	13.9739	7.35647	16.9466	6.54423	14.2514	8.86197	11.3467	9.02027	11.7871	8.03272	12.9032	8.39307	11.9287	6.83702	13.3351	7.8072	12.4275	6.52502	12.4544	6.52845	11.3629	6.87449	14.555	9.10039	11.981	8.68694	10.7538	8.80082	10.0543	5.98263	10.6217	6.22959	9.36777	6.73316	10.6381	6.98466	10.2359
ENSG00000174013	14.3516	13.9762	13.9901	14.2376	14.0753	14.5123	16.1335	14.4411	14.7585	13.7086	14.5259	14.4296	15.1783	14.0752	14.8927	14.1052	14.9504	14.2769	15.8158	13.864	14.9602	13.9764	15.1564	13.9223	14.2426	13.6151	15.4665	13.9954	15.2951	14.488	15.6431	14.0017	15.2819	14.5384	15.4341	14.1477	14.6669	14.5191	14.4577	14.9796	15.3147	14.2908	14.5585	13.6195	15.1195	15.1139
ENSG00000196704	16.1376	15.4117	15.3566	14.7303	16.325	14.5903	16.4623	15.1055	16.2976	15.5617	15.7613	14.4427	16.4068	14.7043	15.6788	16.1455	16.496	15.73	16.2889	15.2353	16.2254	15.9551	15.9607	15.4924	15.3909	15.3443	16.7223	15.3941	15.8765	14.7955	15.1621	14.5868	15.5334	16.0818	15.3062	14.7928	15.7083	14.8072	14.8614	14.6647	16.4023	15.6922	15.996	15.9435	15.4749	14.8973
ENSG00000178821	9.6025	8.80183	10.6636	10.5003	11.3627	10.0856	8.97442	8.64101	10.283	8.83804	11.3394	9.41601	11.5787	9.65126	9.31946	9.13155	13.1587	8.92611	11.4623	9.74321	10.8761	9.35251	12.0505	10.5071	10.4599	10.5425	10.8922	9.30644	10.4233	9.94674	9.50815	9.84326	11.4713	10.4067	10.0068	9.23499	9.56559	9.20811	10.8132	9.8776	10.6765	9.02736	9.71465	7.5764	10.4316	9.75833
ENSG00000196126	17.9982	17.1211	15.5021	17.9037	19.1275	17.6236	15.1245	17.3281	18.8714	20.0047	18.7477	20.2809	16.7288	18.2878	18.9012	19.374	18.6876	18.199	17.3818	19.4995	16.8509	18.7967	18.6893	20.2166	17.0239	18.6213	17.1526	18.0064	16.7348	18.5731	19.6356	19.7269	19.0452	20.8561	15.8508	15.9367	13.9264	18.3296	16.4512	17.0445	16.6887	19.0351	18.565	17.4713	16.4899	15.4015
ENSG00000176928	9.18891	11.9536	9.11896	10.3394	9.33318	12.0933	8.99086	13.1856	7.38945	12.1572	8.51921	10.499	7.54969	10.768	8.42492	11.3275	6.17801	11.7871	7.57632	9.6544	8.77265	10.5185	12.8588	11.1536	9.51692	9.88889	10.8366	11.3633	7.51757	10.7145	7.3065	11.4251	8.71811	12.3022	5.0057	11.2818	10.2053	10.2252	8.9889	10.5921	6.9996	9.95076	8.47464	12.3374	8.20576	9.68301
ENSG00000034239	4.84786	5.35169	5.02577	5.12981	4.36398	5.13096	3.88227	5.17184	3.68188	6.10187	3.73535	5.88598	4.19886	6.16553	4.41691	5.24233	4.24245	6.10958	4.57632	5.63823	4.44548	6.82337	3.44009	6.37161	3.4298	6.67847	3.93898	6.4461	3.99579	6.76614	3.91493	6.13559	3.79775	5.37195	2.63498	6.49173	3.80505	5.95527	4.56357	6.9525	3.94867	5.16647	6.4892	5.98843	4.36885	5.81984
ENSG00000129455	13.5508	2.63498	13.2368	2.63498	4.5981	2.63498	10.3883	2.63498	8.97841	2.63498	7.84742	2.63498	4.41537	2.63498	6.61444	3.49983	7.4822	2.63498	4.13488	3.38871	9.73348	2.63498	9.42491	2.63498	9.36444	2.63498	10.6034	2.63498	11.4775	2.63498	10.4562	2.63498	6.41058	2.63498	6.36646	2.63498	3.80505	2.63498	10.6271	2.63498	3.52706	3.46932	10.9362	2.63498	4.57948	2.63498
ENSG00000143033	13.8127	13.6256	14.1961	14.0762	14.136	14.1428	15.4677	15.0316	13.1165	14.0454	14.0203	14.4187	14.5885	13.7338	13.567	14.2022	14.8334	14.0809	13.8816	14.5435	14.4914	13.6974	13.8509	14.159	15.0132	13.728	14.4613	13.4391	14.8635	13.9743	13.8779	14.2045	14.2494	14.0216	13.0518	13.8169	13.7927	13.706	13.7346	13.7494	14.0116	13.6309	13.5625	13.3429	13.7215	13.9238
ENSG00000270757	10.1569	9.37627	11.2714	11.659	11.8697	11.4356	12.0461	10.4549	10.7857	9.63502	8.46603	9.57187	11.073	11.0312	10.8402	12.3468	11.3496	11.2882	11.2487	11.4015	10.2913	10.1955	11.0141	10.9184	10.2072	10.7121	11.4382	9.6647	10.7316	12.1201	11.8346	11.3301	10.7985	11.6807	10.3822	9.69723	11.027	9.41305	10.1277	8.14803	10.6559	10.9283	10.9395	11.9395	10.1775	11.3125
ENSG00000259956	17.4415	17.4114	16.7762	17.7092	15.0706	17.2882	17.5083	17.0568	17.448	17.0297	16.8338	17.0561	17.4511	17.5059	17.1541	16.0338	17.4037	16.8969	17.3385	17.292	17.6595	16.8801	17.4476	16.8511	15.8884	16.7713	17.075	17.1853	17.1414	16.9724	16.9719	17.185	17.1004	16.6278	16.8118	17.2221	17.8594	17.4076	17.0557	17.9366	17.9156	17.1936	17.6359	17.6826	17.659	17.1338
ENSG00000278987	5.52053	4.47053	5.18636	4.66826	4.92607	4.52272	9.12242	4.78045	4.167	4.39401	9.60788	5.16157	4.41537	5.03433	4.95275	4.09267	5.64666	4.78812	5.43777	5.38728	4.68784	3.41414	5.09267	3.60116	6.64406	4.04079	4.2079	3.54413	6.74473	4.15652	7.36103	5.09041	5.74352	3.55309	5.55079	4.88824	5.17659	4.61308	5.78423	5.77336	5.99816	5.16647	4.67618	4.26906	4.57948	4.22929
ENSG00000260729	5.37097	6.08777	7.73851	7.06231	8.16376	6.4423	6.11884	6.82791	6.14612	5.00424	5.16996	5.09654	5.88586	7.45927	7.96444	6.53143	7.16854	6.98289	5.86429	6.87067	5.63501	7.20624	5.98713	6.72844	8.73182	6.50276	7.16819	6.42475	6.76466	6.62514	5.91867	7.30163	5.80046	4.73238	6.51886	7.7201	9.48101	7.40721	5.042	7.43513	7.40699	6.95718	6.5039	8.30577	5.64975	7.00994
ENSG00000196296	6.65262	5.6791	7.39277	6.70774	8.03151	5.61849	6.18614	6.75625	6.32702	5.57168	9.13501	7.24041	6.20079	7.8533	7.42343	5.5624	6.42652	4.78812	6.42965	6.73588	7.27691	5.83865	5.79188	6.09265	9.38753	7.21205	6.16213	7.16444	7.66242	5.35525	6.42464	8.40149	8.74222	5.9667	8.44331	7.6923	7.08949	6.64027	6.1566	7.65345	6.67448	6.11982	8.19238	5.3037	6.28169	5.90744
ENSG00000221923	10.002	12.2681	11.4311	10.4212	9.11537	10.5133	9.30251	10.3677	9.00264	11.0869	8.46603	10.3105	12.4568	11.6451	11.5688	11.0063	8.93259	11.9153	8.44447	10.7143	8.35676	12.2867	12.7978	11.917	12	11.4839	6.72413	11.1654	11.0096	9.78551	10.2827	11.1713	8.69358	11.5917	8.06802	9.80361	6.69685	10.6665	9.88078	11.8095	10.9237	11.658	11.1255	13.0705	12.493	11.515
ENSG00000109805	13.522	11.7339	14.3322	13.2714	14.1775	13.3262	14.6571	12.4587	13.6438	12.5487	15.8832	12.0884	14.4594	12.4277	13.1754	13.0784	13.9243	12.8163	15.1823	13.828	14.9637	12.9264	15.23	13.1876	14.4747	12.4496	15.8241	12.6911	14.2269	14.4892	14.025	12.1726	15.6842	13.6739	15.6019	13.1744	14.3998	13.4635	14.6439	12.5989	13.7602	13.3239	13.9533	9.20726	13.0442	14.3222
ENSG00000240489	4.59146	4.3769	6.71189	5.90513	5.83124	6.89743	8.37027	5.17184	7.25046	4.94895	6.06249	5.22364	6.50199	5.80003	6.4832	6.31808	6.70881	5.7586	6.4433	4.62871	4.93792	4.22611	7.3137	4.12433	5.95592	5.44076	6.89891	5.48232	5.85446	7.00287	7.94387	6.30893	6.08582	5.50448	6.74739	5.52869	6.71182	7.06517	7.29277	6.17106	6.19355	6.68413	5.7504	6.02191	8.45545	6.98621
ENSG00000163975	14.483	13.5935	13.1013	13.8665	14.2388	13.6049	14.787	11.6079	14.0003	12.5414	14.8052	12.4154	15.1566	15.2293	15.078	11.5524	14.3427	12.0456	13.5056	15.2744	14.7874	13.5527	17.5349	15.2224	15.8089	13.8377	15.7642	12.9877	15.0929	12.4743	17.239	15.1745	15.2027	11.089	19.088	13.34	16.2971	12.7831	14.8232	12.8753	13.1712	12.6794	14.3806	11.3064	14.2059	13.1474
ENSG00000239893	4.06733	3.54467	5.32998	5.61722	2.63498	2.63498	6.35629	5.99895	4.76752	6.10187	2.63498	2.63498	2.63498	2.63498	3.24599	2.63498	3.31927	2.63498	9.14724	5.50444	10.3753	4.44561	2.63498	2.63498	2.63498	2.63498	9.3954	4.71427	4.59779	4.93141	8.33841	5.09041	4.60415	6.66964	2.63498	2.63498	8.41952	6.39836	8.19326	5.48268	2.63498	2.63498	4.83125	2.63498	4.248	4.59137
ENSG00000270720	4.35795	3.54467	4.2258	4.52178	4.15262	4.29573	7.24908	3.94548	4.61574	4.09831	3.73535	3.62721	4.80864	3.95963	4.41691	3.49983	4.46372	4.78812	4.90174	3.91316	4.84354	3.95451	4.50015	4.8286	6.1065	4.04079	4.52103	3.54413	5.13419	3.37772	5.39042	4.27365	4.4612	3.91319	4.18069	4.12507	6.01532	3.68032	3.65154	4.43938	4.48168	3.46932	4.83125	2.63498	4.47866	3.58571
ENSG00000127329	15.5331	16.7967	16.0192	15.4828	14.7701	16.414	16.1533	16.1699	15.1464	15.9293	15.5361	16.8549	15.2822	16.2549	16.0078	14.7324	15.4652	16.4828	16.212	16.1779	15.8474	14.957	14.7367	15.3968	15.1192	16.2895	15.4257	15.6708	15.4734	16.0213	17.1045	16.3245	15.7368	15.4715	13.652	16.3446	16.1328	16.9187	16.135	16.744	15.7545	16.3151	15.9209	16.3824	15.6366	16.792
ENSG00000143183	17.2861	17.9427	17.6969	18.2697	17.0993	18.3798	17.3542	18.7089	18.4412	18.4185	17.3242	18.6928	17.2944	18.4461	16.6999	18.2686	17.0165	17.7053	17.9253	18.3426	17.0302	18.7528	18.2442	19.0983	17.2034	18.2105	17.886	17.7878	17.5949	18.0444	17.8718	18.3718	17.0639	18.7039	17.9356	17.4143	17.274	17.4795	17.6987	17.6229	16.8886	16.9464	17.0936	16.8201	16.8444	17.9986
ENSG00000108774	19.3562	18.573	19.1177	18.9287	18.7324	19.1609	17.5573	18.6429	18.5375	18.5378	17.9484	19.3291	18.9032	18.7868	18.297	19.041	18.8473	18.7532	19.1352	18.7049	18.7243	19.0266	18.5848	19.2464	17.8063	18.6541	19.1248	18.9082	19.1697	19.1617	18.3258	18.709	18.2274	19.3708	18.0986	18.2159	17.6673	18.3949	17.8467	18.5592	18.6836	18.5788	18.6248	18.5633	18.9741	18.6246
ENSG00000183696	13.692	15.9774	15.4617	16.0294	16.0046	15.7298	12.4626	16.0172	12.9045	14.6002	14.7518	16.9491	12.664	14.7833	14.2548	15.5617	12.6533	14.5546	14.3147	13.9352	15.7509	14.7958	13.2915	15.0273	14.9291	13.4794	14.8561	15.0604	14.8108	16.6748	13.3381	15.0451	14.301	17.8432	15.103	14.9144	13.5431	14.0422	14.6576	15.8695	13.0911	14.7928	13.7321	12.8499	12.2853	15.1298
ENSG00000269680	6.65262	5.15337	6.95848	5.39493	5.71963	4.84174	5.74659	7.0538	7.77462	5.42062	8.12741	6.30679	5.90773	7.22629	5.91684	4.38745	6.48531	4.13843	6.79144	6.07364	5.95213	5.33044	6.032	5.10585	8.74163	5.8716	6.72413	5.6777	7.36954	4.36832	7.46425	7.05484	7.24776	5.83995	5.7056	6.84565	8.70337	7.16291	7.35791	6.7854	8.11409	6.11982	6.57522	4.26906	4.00001	6.39194
ENSG00000235944	8.54396	7.00302	8.04272	8.46421	9.46203	7.87595	9.01631	8.25688	7.90384	7.74938	6.51789	8.6618	9.44289	8.73148	9.63274	8.03241	8.88122	7.76161	8.61328	8.26685	7.87065	8.76059	10.0425	8.66902	8.37218	8.57072	9.02246	7.6685	10.0037	7.83624	9.53546	8.86704	6.49286	8.70355	10.1431	7.82622	7.08949	8.48751	8.30747	6.7692	9.76261	8.43271	8.8052	9.04332	10.1478	7.53067
ENSG00000092067	6.818	4.16424	4.44526	7.62333	7.51513	7.5324	3.66348	5.47516	3.68188	4.6312	3.42225	6.5626	3.70469	4.69531	6.26587	9.32246	5.74709	5.06198	3.65893	4.39174	3.41407	6.43007	8.02476	8.10551	8.02645	5.47636	4.2079	7.45427	6.40667	4.93141	4.78388	7.74335	7.88153	9.71823	3.9158	3.36136	2.63498	2.63498	6.07228	3.87897	4.9138	4.04369	3.40905	3.99118	4.36885	3.31322
ENSG00000269113	9.48035	12.5632	9.61858	8.67855	10.8895	9.94599	7.70732	8.42761	6.85116	11.3095	7.19755	9.61748	9.697	9.18097	10.8468	10.8004	7.43543	11.0986	8.91827	9.4779	7.55157	9.19234	8.17609	9.62084	9.03812	9.86112	9.0923	10.2923	7.03455	10.7926	7.72393	9.86793	9.62611	9.22024	9.69969	12.275	8.97177	11.7084	9.47283	12.1554	7.75312	11.5911	10.2168	12.5388	9.98042	12.0411
ENSG00000272512	7.12376	5.52501	7.9698	5.72694	6.30161	4.99416	5.50224	5.47516	5.74311	6.21965	8.26721	7.07007	4.9892	9.20404	7.34017	5.24233	8.56863	4.4406	6.5855	6.07364	7.44791	5.83865	7.64268	6.09265	9.86236	6.50276	5.5932	6.08628	9.40961	6.30852	8.46813	8.30084	7.1428	3.91319	8.68694	8.51301	6.13182	6.22742	7.59846	7.18987	5.57828	6.32728	6.4892	7.19486	8.84539	7.93303
ENSG00000129451	17.3014	10.8812	14.2169	7.07875	9.72	8.79893	13.6819	8.82687	17.5291	9.38523	17.4822	7.15001	10.2774	8.84155	13.9951	5.69846	9.23323	9.21297	10.5525	6.50644	15.5306	8.25106	15.4032	9.04183	13.4418	9.07616	17.5208	8.93774	12.9601	9.70051	17.2654	7.53552	17.5229	8.84904	3.9158	8.45797	10.9831	7.7704	19.4199	10.1683	9.48012	9.06525	17.1516	9.64789	8.65889	9.87464
ENSG00000117139	16.7882	16.7566	16.6144	16.8872	15.8363	17.3081	17.3071	17.1289	17.2169	16.5373	17.3632	16.7712	16.7429	16.8169	16.4339	15.2257	16.6387	16.4365	16.9292	16.782	16.5385	16.0967	17.3736	16.2706	15.7771	16.9658	16.0025	16.6525	16.3124	16.0277	16.7069	16.4986	17.209	15.6165	16.5312	16.2518	17.876	17.022	16.8444	16.9943	16.2545	16.3122	16.4035	16.9374	17.687	16.4553
ENSG00000001460	12.7799	13.5971	11.9281	14.0622	12.0382	14.8607	11.5142	14.2894	12.231	14.0643	13.1853	14.9497	11.7142	14.2194	11.6061	12.8537	11.1771	13.7127	13.1888	13.4342	13.2898	13.639	12.6512	13.8784	12.7861	13.0213	13.2531	14.0594	11.6463	14.3802	11.77	14.0092	13.644	13.8358	12.2674	13.7382	12.9482	13.7365	12.3133	13.3063	12.3056	12.9598	12.6416	13.4984	12.0383	13.4724
ENSG00000080031	16.0728	18.7408	15.8822	19.2326	16.6569	19.4324	14.5831	19.1741	15.2527	18.092	16.8732	19.7667	13.9527	18.7964	14.5301	17.0743	13.956	17.7461	16.0903	18.1267	15.5873	17.484	15.6068	18.4967	14.9197	17.0474	15.8535	17.7271	16.3038	19.3503	14.7938	18.6292	16.9511	18.3968	14.8594	17.7383	15.135	18.1348	15.5184	18.0514	15.176	16.8562	14.7796	14.4838	10.7427	17.921
ENSG00000168300	15.987	16.4956	15.9547	15.7327	15.5803	15.8669	17.4693	16.5328	16.7013	16.7188	15.7946	15.7193	16.407	15.5241	15.5862	16.6818	16.077	16.7379	15.5862	15.6275	15.2472	16.7079	15.8825	16.3885	16.5429	16.549	16.3057	16.2978	15.0182	15.1676	16.3225	15.8377	16.0689	16.0579	15.198	15.6594	17.1543	16.1405	15.508	15.3864	15.4861	16.2386	16.1944	17.3548	15.4482	15.5642
ENSG00000268947	5.65555	4.98297	5.02577	4.66826	7.07845	4.52272	7.49307	5.99895	4.61574	5.70796	9.20157	5.72652	4.9892	5.46948	5.57914	2.63498	6.33992	5.35747	5.196	6.42097	5.95213	3.41414	5.79188	3.60116	7.65621	4.81051	4.2079	5.15212	5.85446	4.93141	6.34927	7.93082	6.54887	2.63498	3.9158	6.56741	6.33957	5.3679	5.18056	5.77336	5.26254	5.33281	5.01307	3.99118	5.05954	5.4017
ENSG00000126391	16.241	16.0046	15.2597	16.3353	15.0306	16.3282	14.4055	15.7076	15.8733	15.0743	15.6181	16.4609	16.4026	16.1362	15.2135	14.44	15.2916	15.0514	15.6352	15.9418	15.7054	15.4064	15.7721	16.0179	15.1171	15.6478	15.6668	15.6214	16.6528	15.7805	14.9886	15.9386	16.6678	15.7277	16.4789	15.7897	15.5794	15.5638	15.5563	16.5869	15.5663	15.1674	15.7703	14.4152	15.4938	15.3445
ENSG00000130589	17.9281	15.699	15.7124	16.2688	14.6041	15.4313	17.589	15.1184	17.624	14.4655	15.2066	16.2427	18.9006	16.5778	17.2064	14.9765	17.9241	14.3867	18.7997	15.8105	17.7763	14.7908	17.0203	14.9593	17.6911	15.0429	16.1425	14.8457	18.4798	15.7634	18.0604	15.345	18.5652	13.2397	16.9535	16.947	16.5774	15.8896	17.7756	17.7006	18.6474	16.557	16.989	14.898	16.3078	15.7301
ENSG00000106125	12.778	12.0536	12.0034	10.7402	12.42	11.1067	13.1662	9.85073	12.0359	11.4266	12.6968	10.2646	13.0587	10.7175	12.8865	11.3714	11.9111	11.6043	14.3208	10.5793	13.3174	11.0997	12.7212	10.8988	12.763	11.0961	7.53891	10.7929	13.5631	10.8988	14.057	10.3917	12.0122	10.7496	12.5451	11.4084	11.0726	11.1118	12.3007	10.5631	13.6672	11.5751	11.9957	12.5459	11.8807	11.4677
ENSG00000076984	15.8464	15.8672	15.1068	15.8095	15.3766	15.4416	13.9499	15.2046	15.9727	15.3424	15.1688	15.6749	16.2051	15.9976	15.5395	15.1465	15.7733	15.7799	16.0339	15.6937	15.2406	15.7348	15.7141	15.6338	16.7112	15.6736	15.5764	15.9352	15.5812	15.1371	15.5126	15.676	16.559	15.1985	16.1093	15.7797	15.8826	15.5742	15.8704	15.6911	15.79	15.8359	15.3652	16.6679	15.5574	15.273
ENSG00000271824	9.57972	12.4499	10.264	13.5882	2.63498	13.9161	10.0693	13.336	8.27813	11.6601	6.57664	12.0823	9.18605	13.1856	8.9388	12.4956	4.0436	11.5775	9.53128	13.34	5.71479	13.1129	10.3028	14.6034	9.65827	14.0793	2.63498	12.9193	10.7125	13.0148	9.19359	13.6256	9.75019	13.7158	2.63498	13.225	5.34333	13.0741	9.33603	11.4314	9.88829	10.2556	8.66573	9.3993	4.00001	11.463
ENSG00000133624	11.8594	11.8651	12.4974	11.2956	11.8567	10.8245	12.5268	11.5875	12.2712	11.3095	13.3034	11.9114	10.7904	11.908	13.2891	11.1151	12.8713	10.7854	12.561	12.0857	12.8109	11.1751	12.8486	11.0243	14.148	11.9445	11.3981	11.592	13.1604	10.4224	13.1393	12.2051	12.0824	11.0795	10.5336	12.1666	12.5362	11.5539	11.7468	11.3897	12.5624	11.9158	11.918	12.2588	11.3054	11.8137
ENSG00000155974	9.83887	10.9655	8.05284	9.58105	5.59836	10.341	10.6831	10.2652	10.1901	11.3915	7.58761	9.75139	11.2534	10.1287	9.86569	10.6075	11.0789	11.7946	6.5855	9.82687	10.8276	9.86589	11.0558	9.62084	7.21412	9.98133	8.07058	11.6308	8.83135	9.65605	9.83243	10.1314	7.69138	10.2916	10.0323	10.477	8.27119	9.93886	7.98474	10.2808	11.0192	10.8251	10.3634	13.9551	8.00589	11.0468
ENSG00000279064	6.04632	3.9018	4.68761	4.29488	4.5981	3.8399	4.6861	2.63498	4.61574	3.50335	3.73535	4.2946	4.19886	4.23212	3.67832	2.63498	6.01141	5.06198	5.43777	3.38871	5.02604	5.18681	4.74789	5.10585	4.72421	4.97257	5.74917	4.16337	3.61437	2.63498	4.96304	2.63498	3.79775	3.91319	6.11591	4.12507	4.56941	4.94278	5.042	4.13738	3.94867	3.79955	4.83125	3.61094	6.01343	3.31322
ENSG00000117394	18.5698	16.7032	20.6213	17.894	18.2306	17.3669	20.5901	16.9493	20.0171	16.058	18.7578	17.9841	18.6974	18.0916	16.5147	15.3226	16.365	16.379	18.0281	16.8612	18.5256	15.9161	18.173	16.7654	19.1149	15.822	18.6281	16.9618	20.6959	17.7932	20.1491	17.0072	19.8022	16.5488	17.8339	16.2707	18.6519	16.1475	18.4169	18.1469	17.8937	16.5934	19.1673	15.24	16.2674	16.8607
ENSG00000261654	4.59146	6.08777	3.72403	5.36788	3.6716	4.29573	8.69947	5.99895	5.3712	4.6312	6.66048	7.48182	4.19886	5.84827	5.90313	4.62398	5.92868	5.54367	4.90174	5.25924	5.57917	4.22611	4.74789	4.57383	5.37375	5.61027	4.2079	3.90107	3.99579	4.60289	5.2623	4.74584	5.74352	3.55309	2.63498	5.30715	4.05019	4.16483	5.88691	5.89884	5.37599	4.04369	5.44593	3.99118	4.57948	4.03183
ENSG00000251615	9.55657	11.7463	7.50031	10.5445	5.71963	9.87253	8.6352	10.6123	6.64422	11.5012	9.42098	10.7032	10.1229	10.3319	9.17167	8.72797	7.24515	10.4791	8.53294	8.84491	8.2107	9.41661	7.53858	9.18132	7.55591	8.65307	7.78983	11.2002	6.9326	9.14703	7.07438	9.91457	7.43124	7.48153	6.94444	10.7335	6.61952	9.9476	7.55592	8.74763	9.26844	11.0452	9.24265	12.8383	9.41588	9.83211
ENSG00000125743	17.8446	16.6724	18.7587	17.4464	21.2209	17.2511	19.1375	16.829	18.8639	17.2667	18.2022	16.6066	17.4677	16.9459	17.7454	18.8479	18.1387	17.8542	18.6383	17.3393	18.4736	18.3353	18.6796	18.3664	18.1978	17.6891	19.6231	17.1042	18.8458	17.8469	18.3767	16.9048	17.7312	19.1465	18.2676	17.1241	17.8024	16.7947	18.4474	17.1834	18.3691	17.4645	18.2696	17.4423	17.9229	17.3872
ENSG00000030304	6.04632	9.73721	3.95424	8.55791	3.89192	8.01907	5.62975	6.60119	3.68188	8.52026	4.1575	9.82615	5.14822	8.75668	4.57341	8.92518	4.60682	9.21297	5.0569	9.63722	2.63498	9.14345	3.44009	8.45383	6.1065	9.99793	2.63498	8.37066	4.27445	8.15028	3.69094	9.61266	5.17781	8.30698	2.63498	9.7042	2.63498	9.93259	5.88691	10.3243	4.9138	10.1429	5.01307	9.24285	5.21767	9.57209
ENSG00000088179	13.149	13.276	13.5254	13.2101	13.6075	13.438	15.8953	13.7878	14.2328	13.2675	13.9338	13.4845	14.4723	12.8122	13.6835	12.7759	14.4771	13.2866	12.7089	13.2318	13.5729	13.1416	13.1657	13.1057	13.7118	13.4457	13.3352	13.1757	13.4368	12.6038	13.6173	13.1989	13.7263	13.4214	13.4316	13.1619	13.7279	13.5373	13.1218	13.2534	13.6454	13.1134	13.4248	13.7818	13.1005	13.1823
ENSG00000261840	6.35226	6.19297	6.29884	6.63166	5.97399	6.01389	7.01151	5.86811	6.94442	5.29541	6.45662	6.69665	6.0123	6.74849	5.78834	6.51329	6.37768	5.94496	6.20735	6.77078	6.72499	6.07768	6.27498	5.99704	7.60693	6.37853	6.0172	6.54836	5.69578	6.42677	7.94387	7.18844	7.37058	5.32479	8.10273	6.8355	6.61952	7.04666	5.90658	6.19562	7.27599	6.96956	7.49755	5.95415	7.62017	5.90744
ENSG00000234769	6.74518	6.97395	7.4704	5.63986	6.87697	7.26415	7.01151	5.28056	7.48209	7.26346	8.32809	6.1279	8.14034	7.57721	6.94847	6.01625	6.51946	6.94007	7.0268	6.60008	6.03691	8.31555	7.23018	7.71643	7.432	8.25631	6.26828	6.21659	6.48098	6.45487	7.8326	7.32858	7.22737	7.21678	5.17715	5.39444	7.7192	7.26246	7.17718	6.84844	7.21172	7.04167	6.8754	7.25197	7.72862	7.15884
ENSG00000162441	14.3629	14.8475	14.6958	15.1406	14.3812	15.6656	15.3676	15.4161	14.1285	14.9643	14.695	15.2877	13.8708	14.3941	12.8416	15.1225	14.1792	14.8586	15.1087	14.7615	14.6516	15.1061	14.4909	14.9369	14.6295	14.7394	15.7788	14.9398	14.3186	14.5347	13.2588	14.8103	15.3426	16.1258	14.5972	14.4381	14.8036	14.8718	14.2075	14.7878	14.5735	14.6507	14.0067	14.7462	13.9248	14.9243
ENSG00000206344	7.59009	7.08686	8.47778	8.56957	6.23863	6.22199	7.88376	8.95206	4.94575	6.78975	8.89751	9.24853	5.53739	8.21332	9.08719	7.70653	7.42948	7.10416	8.74257	9.12367	6.59201	6.90407	6.29347	7.79373	8.45801	8.0284	6.81418	8.86859	8.74396	7.20604	4.96304	9.32475	7.96181	8.25261	8.44331	8.10446	5.2625	8.05096	6.73971	6.68532	7.51258	8.48956	6.65637	7.7841	6.64914	7.68584
ENSG00000278126	6.65262	8.13746	7.21471	5.49813	5.59836	4.52272	6.28146	7.19584	8.76832	7.80284	6.25524	6.30679	6.45846	6.16553	6.57202	6.60173	7.60875	6.39072	6.42965	5.63823	6.33299	6.95906	6.75958	6.8053	7.39098	7.27293	6.16213	6.73324	6.40667	6.54906	6.16792	6.32695	6.92364	6.93877	4.18069	6.56741	7.36007	5.85154	5.3063	7.3288	6.79124	6.68413	7.43012	8.78295	6.6383	6.84379
ENSG00000009724	7.2657	8.18887	6.50551	7.43843	6.95709	7.78872	8.73615	7.93955	5.95893	8.36142	10.4767	8.1276	6.20079	8.47483	7.12871	6.70111	8.45904	7.80989	8.03272	8.15713	7.88772	7.27713	7.53858	8.1576	10.2353	8.11952	5.21633	7.37882	7.03455	6.128	4.96304	9.98394	8.15389	4.48602	7.19704	9.41572	7.1566	8.73831	5.042	8.60019	7.37	8.12564	6.65637	9.30816	5.14091	7.36901
ENSG00000251301	4.84786	5.94423	7.60036	7.74664	7.74657	5.72824	7.03893	7.65506	3.38318	5.70796	4.81332	6.30679	6.62515	6.51649	7.53333	7.68248	6.01141	5.94496	4.90174	7.07052	3.9544	7.09288	7.04701	6.70856	5.37375	7.73612	4.2079	7.23951	7.58624	6.30852	4.39405	7.5885	5.83718	8.93593	10.8375	6.56741	3.80505	6.22742	5.55316	6.68532	6.55682	6.68413	6.73316	5.3037	5.77505	5.16257
ENSG00000237424	12.4967	12.3285	13.9686	14.0762	11.7925	13.7641	12.4133	13.273	11.7771	12.3367	12.3874	13.0045	11.9922	13.9052	12.7272	10.8124	11.7075	11.2765	13.8469	13.6906	14.0904	12.7186	11.788	13.5134	11.1937	13.2273	12.0103	13.2105	13.1113	11.1309	12.3033	13.0363	11.0947	11.8595	13.5428	13.4961	13.2781	13.8259	11.9684	12.6786	12.7771	12.1047	11.5386	9.42742	11.2861	12.8886
ENSG00000177519	6.73017	11.8149	6.89225	3.83925	5.59836	4.84174	5.23821	5.47516	6.05561	10.6666	2.63498	6.44042	7.7	6.60273	3.67832	10.0747	6.61727	13.4367	8.14512	3.68945	5.57917	11.1447	6.032	3.97802	4.72421	7.39661	2.63498	9.78006	5.85446	9.03112	5.12093	4.49829	2.63498	8.06203	2.63498	8.68357	3.80505	5.73957	3.86804	4.13738	7.19367	11.2895	5.82311	13.5313	7.87852	9.19911
ENSG00000105048	4.06733	4.16424	8.65429	5.25402	14.8772	4.09134	7.73548	2.63498	9.44423	4.6312	11.8114	4.88011	3.39984	4.8514	7.80931	6.20944	5.53847	5.54367	5.56987	4.39174	12.6059	5.46048	4.27534	4.25365	5.88614	5.8716	7.90877	5.15212	4.59779	5.83774	8.97908	4.74584	14.5051	7.61211	16.5917	5.30715	8.80082	6.56409	7.35791	4.13738	3.52706	6.32728	5.17312	6.11783	6.11907	5.04114
ENSG00000198888	24.5484	26.1682	23.6208	25.0222	21.7946	25.4598	25.1458	25.4673	21.8383	25.9409	24.7505	26.6962	24.342	25.269	22.9151	22.2738	25.654	23.0491	23.8976	24.4857	24.7504	23.0125	24.3903	25.2027	23.9512	23.774	21.8387	25.0655	23.4641	23.5179	22.1833	25.5261	23.4589	22.4303	23.6653	26.9766	24.9926	24.8293	23.3099	26.0662	24.7832	24.7244	24.1235	25.4171	23.1749	24.0609
ENSG00000134072	12.0728	13.9518	13.3513	13.3603	13.8607	13.1896	12.6606	12.6835	12.3113	14.038	11.4334	12.5353	11.9403	12.718	13.0009	14.8158	12.556	14.8227	12.223	13.2487	12.6785	13.8544	13.7006	13.4053	12.7254	12.9546	11.7482	14.1642	12.2206	13.8189	11.8055	12.8542	11.5282	14.3784	13.4685	13.2839	11.3979	12.7866	12.8064	12.6128	12.549	14.1683	12.4004	15.6339	12.9403	13.5092
ENSG00000049239	17.7521	17.7767	16.6735	17.6068	15.9169	17.7906	18.1077	17.9112	15.3959	16.4239	17.09	17.6606	17.107	17.7343	17.5805	15.663	17.5336	17.121	18.1341	17.7298	17.9297	16.322	17.5837	16.8059	18.0204	17.656	15.3841	16.964	16.9327	17.0979	17.0048	16.9979	17.6313	15.9504	16.8622	17.915	17.8881	18.0321	17.0405	17.8402	17.652	17.6857	17.6156	17.8841	17.3223	17.3258
ENSG00000178075	11.516	10.093	12.3074	13.8002	12.4079	14.1331	10.9709	13.9262	12.5095	13.5329	10.0993	13.902	8.12194	12.8557	9.76989	13.418	11.0992	13.5346	10.8898	13.0366	11.588	13.1772	12.2838	13.8265	14.4526	13.3588	12.9187	12.8021	10.0651	12.2509	10.4967	13.81	10.4058	15.2858	13.4431	12.9386	12.1946	13.6004	11.6491	12.5955	11.1569	11.4556	11.4526	9.98915	9.17463	12.4773
ENSG00000103175	12.8226	16.8193	13.3903	12.9078	12.2323	13.2566	12.5994	13.5083	12.0849	15.7717	11.0823	13.9131	13.3926	13.8056	10.4807	16.0927	11.9052	16.4127	13.8563	12.7851	11.8764	14.3763	12.3887	13.0507	12.5894	13.5483	12.2523	15.5749	11.4991	13.2844	13.6173	13.3702	10.9721	13.8096	8.68694	15.8794	9.38185	12.6636	13.112	13.241	14.1185	16.1983	13.3006	18.8159	14.2601	15.0572
ENSG00000108443	14.9693	14.9879	14.5808	14.2034	14.7914	14.4993	15.6445	14.7041	14.6337	14.6532	16.5184	14.4701	15.319	14.2681	14.9561	14.71	16.1795	14.5453	14.6763	14.5917	15.1716	14.6723	14.6492	14.3766	14.3483	14.6153	14.5076	14.3756	15.0933	14.5241	14.9213	14.7797	15.5167	14.7047	15.3161	14.3086	14.4214	14.5048	14.5731	14.8971	15.0249	14.5826	14.6394	15.1629	14.3008	14.6174
ENSG00000272734	10.0719	9.50096	9.49788	8.83887	8.9347	9.11985	10.0748	9.38994	10.9807	9.0263	10.1142	9.76666	9.986	9.47843	11.9074	8.1481	11.1029	10.3525	11.483	9.18299	10.4718	8.38932	9.07266	8.99762	11.8562	9.4497	6.70542	9.43157	11.7483	7.9289	10.5596	11.0363	8.83708	8.93593	3.9158	8.85123	10.7491	9.46266	10.8228	9.19428	9.74107	10.4377	9.69884	12.0946	6.94127	9.05293
ENSG00000233006	8.87183	9.71328	8.97209	11.0567	7.61098	10.5402	7.69016	10.8752	9.50147	10.3257	8.60604	11.8393	6.84362	11.4212	8.00632	8.18279	7.99054	8.74564	9.49423	10.4951	8.85882	10.5166	9.08853	10.8988	9.57842	10.1756	9.33906	10.3777	8.90929	8.26922	8.49968	11.6161	9.18902	10.3731	7.6745	10.3574	9.75402	10.4207	8.35782	10.3421	9.43356	7.94349	7.1975	8.02407	6.50733	9.57209
ENSG00000152049	11.5679	11.993	13.201	7.98304	11.9694	9.93137	12.0484	10.5344	10.8506	11.6601	11.4481	9.96936	10.1673	10.3319	13.9078	11.8354	10.7461	11.9865	11.7365	10.2644	10.055	10.0388	9.79099	9.62084	9.15284	9.88889	9.02622	11.7359	9.78767	11.3785	11.5398	10.7687	8.99394	10.49	11.1427	11.0919	6.69685	10.7743	13.0822	10.6649	10.9926	12.3261	12.6549	13.029	14.0307	11.7968
ENSG00000072694	12.92	12.4297	12.867	13.3436	15.2537	13.0221	9.53162	11.8757	9.56955	13.4645	13.8381	13.9181	9.62209	12.4964	15.3728	14.2926	12.1979	15.0054	10.0715	13.6664	8.98044	13.4379	11.2905	14.5106	11.6214	14.0688	9.53659	14.2329	10.2649	14.5735	9.95633	13.5581	11.636	14.5123	12.4293	12.7789	6.35877	13.6391	11.1913	11.5543	9.88923	15.2773	12.7526	13.0338	12.1314	13.2489
ENSG00000255153	6.55366	7.76643	7.751	7.53087	8.89973	7.66897	6.73789	7.75014	9.00264	7.74938	7.35647	7.83094	7.54969	6.96987	7.08723	8.08837	6.86724	7.57863	6.5855	7.4603	7.15986	8.88478	7.12104	7.68634	6.5575	8.47478	8.36609	7.8228	6.64067	6.62514	7.24983	8.05965	6.4814	8.52141	9.00577	7.85659	7.70434	7.72463	5.88691	6.68532	7.56961	7.94349	6.8754	8.85833	8.73818	6.66586
ENSG00000261663	5.91883	4.47053	5.95181	5.92361	5.93466	4.84174	6.28146	5.79784	4.37998	5.25101	5.63131	4.2946	5.41946	7.10379	5.39373	4.09267	6.8133	5.06198	5.69053	5.11797	6.15528	3.72426	5.40198	5.82175	6.64406	5.32813	5.21633	6.4461	7.79402	4.36832	5.39042	6.23448	6.25744	5.00146	4.18069	5.88786	5.74887	5.2404	5.98263	6.17106	5.92654	5.61522	5.93652	5.3037	4.78071	6.31757
ENSG00000175309	15.4011	16.0593	13.7378	16.4783	14.0562	16.1633	13.7743	16.3734	14.6747	15.5396	16.2284	16.8142	13.6732	17.1005	14.7756	15.1408	14.9303	15.0756	15.1451	15.984	14.1994	16.1789	14.9358	16.4249	15.5396	15.8643	14.0642	15.7497	15.0062	16.0581	14.441	16.9994	16.5708	15.9228	13.9697	16.1667	15.5039	16.0284	15.2299	16.2694	14.2671	15.403	14.3161	14.4205	13.287	15.2877
ENSG00000204713	16.8524	15.897	16.6021	16.3741	15.5322	15.8576	17.4977	16.0549	17.4031	15.4685	17.0021	15.5388	16.8717	15.9635	16.4002	15.8451	16.6017	15.341	16.895	15.9858	15.5662	16.1472	17.1858	16.0554	17.296	16.0577	17.4864	15.8472	18.2112	16.1209	16.8431	16.2568	17.2964	16.618	17.4405	15.8373	17.4685	16.0248	16.9458	16.5543	16.662	15.9628	16.3073	15.5303	17.4018	16.0501
ENSG00000231203	3.48403	4.27539	6.41383	8.48283	5.00647	4.75836	5.74659	6.51687	10.9424	7.98568	6.54757	7.77161	5.22123	6.91485	5.2251	7.5291	3.31927	4.13843	3.65893	3.38871	2.63498	2.63498	5.81782	6.9976	6.08594	6.55286	6.99439	5.35038	4.27445	5.72601	4.57604	4.74584	7.37676	7.54327	6.79925	8.47438	4.56941	6.7126	7.41343	6.83294	4.07721	6.02754	7.2419	2.63498	4.53009	7.87832
ENSG00000011052	13.8544	12.1201	16.1849	13.8179	16.3332	13.5826	14.3597	12.2592	14.2405	12.0893	13.8999	11.3607	14.2776	12.3093	14.4208	15.4495	15.4029	12.7256	15.2915	13.3522	14.9987	11.9519	16.0785	12.4896	15.3546	12.1848	16.7249	13.2081	15.1439	14.527	15.303	11.6556	14.7829	14.9084	14.8764	12.4077	14.2151	12.2792	13.7343	13.1689	14.9101	13.6976	14.4959	13.1358	13.5537	14.7753
ENSG00000181649	13.9868	13.1731	16.8429	15.2411	15.0158	12.9337	12.8193	13.0315	15.7274	12.8658	14.0139	15.0633	13.7496	14.9917	13.2064	12.7106	12.2925	12.1506	15.2465	12.6598	15.9178	12.0286	13.8774	12.2707	13.8888	11.4221	16.278	12.3069	16.0633	14.9311	15.0564	13.2315	14.9533	13.6812	14.3763	13.1619	15.0793	12.4961	15.4892	16.5803	14.8545	13.6026	14.3271	10.1193	12.1332	15.632
ENSG00000110395	15.6218	15.7859	14.3397	14.9025	14.6252	15.1327	16.0546	14.9248	14.904	15.1489	16.3678	15.275	15.4881	15.1567	16.1196	13.7406	15.1435	14.9354	14.7547	15.3276	15.6397	13.8196	14.5124	14.4379	15.1509	14.0793	14.1385	14.9881	15.2287	14.5158	15.3355	15.0102	16.3719	12.6502	14.7091	14.9744	14.3343	15.3062	15.2636	14.75	15.5663	15.4407	15.1832	16.3826	14.7625	14.8323
ENSG00000112305	16.3884	16.6396	15.7842	16.7937	12.8372	17.2574	16.047	17.4083	16.2078	16.6102	12.6337	17.5082	16.4264	16.32	15.3416	16.2697	14.8631	16.4997	16.5568	16.4852	16.0937	16.658	15.7602	16.6872	15.9624	16.4375	14.9051	16.4941	15.8608	17.1255	16.1764	16.4974	14.3957	17.3498	12.1611	16.4777	15.8492	16.5561	15.9714	16.6587	16.1358	16.2858	16.0236	16.3451	15.2589	16.7196
ENSG00000260743	4.35795	4.16424	4.44526	4.52178	6.12124	4.29573	6.38516	5.47516	3.38318	3.84581	5.83936	2.63498	5.7948	3.95963	4.0815	3.84103	5.42115	4.78812	3.87685	3.68945	5.4603	4.44561	6.67773	5.10585	5.62485	5.16196	6.62804	4.46952	4.27445	4.36832	5.9802	4.90459	3.59261	4.17762	4.73628	3.36136	4.56941	4.76471	4.3327	3.87897	4.9138	5.16647	4.83125	3.61094	4.88032	4.03183
ENSG00000167880	18.6187	15.0622	15.7268	16.5805	15.7515	15.8583	15.5473	15.4262	19.6283	14.4184	15.9812	15.3552	18.1942	16.0481	15.0149	12.8867	17.2285	14.3361	17.9732	15.6925	17.2697	14.3463	16.3057	14.5815	17.2392	14.9556	15.4342	14.9567	17.7957	15.068	18.2603	15.3809	17.2622	13.174	16.6132	16.0799	18.1557	16.0607	17.4473	16.2682	17.7469	14.9966	17.778	14.1742	12.3106	15.9919
ENSG00000139988	5.94527	5.20572	7.60036	5.44749	3.98607	4.57348	5.97386	3.57701	7.44007	4.55704	4.1575	3.62721	6.77443	4.57965	6.20036	4.38745	5.94562	4.78812	4.77213	5.55951	6.2469	4.84369	6.64937	4.97441	6.20504	3.7971	4.52103	3.90107	5.31135	4.30188	4.45774	4.68832	4.04156	5.17272	4.05629	4.66543	5.17659	4.08417	6.08955	4.52526	6.86917	4.81459	4.72996	5.24726	5.20266	5.76455
ENSG00000104998	13.1851	12.1709	14.0809	12.6352	14.7931	11.9948	12.2447	11.9705	11.5722	12.3972	10.6122	11.7941	13.4142	12.2661	14.5829	12.1651	13.1822	12.5539	12.2365	13.3922	13.6046	12.1871	14.6837	12.3717	14.8171	12.2181	15.1791	12.8589	12.4607	13.237	14.783	11.8551	14.265	11.9415	16.1853	12.802	13.7898	12.4867	13.5988	11.7766	11.7378	12.6041	13.5304	11.3413	14.0206	11.609
ENSG00000082068	14.8174	14.2686	14.3269	14.3999	14.5543	14.2621	15.2615	14.2886	14.537	14.3815	13.8323	14.028	14.8058	14.2635	14.3979	14.9081	14.206	14.5866	14.6787	14.4122	14.2615	14.7444	14.7043	14.725	14.3793	14.4934	14.8052	13.9923	14.4358	14.1411	14.4283	14.2364	14.0398	15.3237	14.8911	13.9942	14.0404	13.9519	14.5469	14.351	15.1733	14.1205	14.1752	14.6299	14.727	14.1882
ENSG00000136319	13.169	12.9895	14.0887	12.9584	15.1207	12.787	14.4727	12.6271	12.1886	12.4333	13.4062	12.5968	14.1182	12.4941	12.319	14.3115	13.3867	13.047	11.669	13.1178	13.3197	13.7191	14.2212	13.7516	13.7724	13.5321	15.3192	13.0491	13.5823	13.0536	13.4314	13.0208	13.8399	14.3563	13.8623	12.5425	13.1316	12.803	12.9338	12.6519	12.4225	12.6794	12.6773	12.9386	13.7882	12.9171
ENSG00000153044	11.2922	10.8039	11.9909	11.7974	11.8426	11.3633	13.575	10.7838	12.4208	11.7838	13.3082	11.0338	13.9024	11.0999	13.4608	12.3185	11.8338	11.7536	13.2827	12.3991	13.2832	12.0768	13.1768	12.5472	13.2569	11.4221	12.3224	10.8959	13.6688	11.7358	13.9511	10.7809	14.6953	12.6446	15.124	12.1334	13.864	11.2001	13.8644	12.1081	13.2952	11.79	12.9817	10.841	12.127	12.1563
ENSG00000255774	11.3978	10.7202	9.94211	13.0134	9.35363	13.0151	9.95666	11.9566	10.671	10.8123	8.62001	12.04	11.9679	11.7597	6.94184	10.887	7.04149	10.5606	10.3954	12.3346	9.45885	12.0102	10.7253	12.7503	9.20104	12.039	9.65792	12.0141	10.2332	10.8796	9.65857	12.3418	10.1603	13.5664	10.5272	10.3261	8.9245	11.2999	9.97132	10.3076	12.0181	9.76135	10.7592	8.1865	12.4589	10.2706
ENSG00000079819	18.4156	18.7452	19.2259	17.1529	17.3271	18.7347	19.8557	19.1199	19.3946	17.9228	19.5293	17.5553	19.0585	16.9922	19.4455	17.9552	17.4829	18.4545	20.0299	17.5685	19.9837	16.8118	18.3635	17.12	17.2232	17.0268	19.6158	18.3043	18.4177	18.8332	19.9539	17.2177	18.5309	17.7356	17.9528	17.5487	18.8795	17.5946	18.4053	18.0028	18.898	18.6149	19.3205	18.7369	17.0954	19.3038
ENSG00000197927	9.12168	7.04555	8.72876	6.40208	9.10444	4.16362	9.47766	5.99895	9.28936	7.13818	7.15972	4.79934	8.42558	5.91767	9.25949	6.83834	10.2089	7.08465	7.3129	4.17759	9.24602	7.07309	7.99137	3.97802	8.0318	6.63264	5.5932	4.46952	6.9326	6.30852	9.70892	7.14864	5.68416	2.63498	8.16975	6.17386	7.65109	7.08344	9.21055	6.09474	7.80152	6.98183	9.60015	7.20935	8.98303	4.54574
ENSG00000251359	5.01179	5.8179	5.18636	4.99306	3.6716	4.66926	4.73418	2.63498	7.48898	5.05733	5.0893	4.01303	4.9892	5.46948	5.39373	5.24233	5.05899	6.25708	5.43777	4.62871	4.22599	5.33044	4.74789	2.63498	5.22872	5.61027	3.93898	5.81647	4.27445	5.47164	4.39405	4.27365	3.59261	4.48602	3.55502	4.56426	2.63498	4.76471	3.36107	3.87897	4.1362	5.73751	5.44593	6.51928	5.77505	4.59137
ENSG00000143793	13.3523	13.0039	13.8139	13.0596	14.2525	12.6007	13.1828	12.4013	13.3705	12.5076	13.0344	12.3719	13.9808	12.9939	13.1107	12.8005	13.599	12.8188	13.5706	13.0617	14.2158	13.5586	14.5885	13.4091	13.7589	13.3013	13.6823	12.9586	14.3466	12.9681	13.9395	12.7812	13.8693	13.1784	13.8256	13.0431	13.8947	12.8923	13.9887	12.6182	13.4397	13.4621	13.1961	13.5353	13.5422	12.9985
ENSG00000134333	21.8152	20.7187	22.8136	21.2084	21.3304	21.7611	21.7949	21.8304	21.4762	21.1839	22.6632	21.5188	22.3872	20.4256	21.4659	22.2235	20.7278	21.1647	21.7832	20.7243	21.8504	20.449	21.8508	21.0303	20.3684	20.0902	23.4656	20.6302	22.3773	22.6284	21.7693	20.5129	21.2513	21.6638	21.9936	20.7886	20.8971	21.2589	22.0374	21.0458	21.3983	21.1631	21.4158	20.6494	21.3541	21.3264
ENSG00000143184	4.51841	6.2181	4.05241	7.64555	6.56778	7.25694	5.74659	7.37371	8.02241	6.78975	5.0035	7.9156	4.19886	5.55974	6.92847	9.90853	5.49272	8.02963	3.36645	5.61248	2.63498	6.94823	3.75971	6.82388	4.25585	7.69965	3.93898	6.86569	5.19584	6.58761	8.43224	7.02216	7.0058	8.506	4.48957	5.88786	5.34333	6.0331	4.61516	6.33467	3.80192	4.81459	4.56132	6.47185	6.80748	5.37709
ENSG00000182872	16.8604	16.6045	16.6719	17.2274	16.3745	17.0327	16.7355	16.2763	16.6311	16.4853	15.7592	16.6327	17.3824	17.0133	16.5274	15.6713	16.7082	16.1114	16.7785	16.8569	17.3532	16.6244	17.1292	16.5091	17.0353	16.5885	16.7448	16.978	17.2837	16.8801	16.6927	16.5895	16.8833	16.2785	17.5624	17.0726	13.3884	16.9004	17.3205	17.0186	17.3064	16.6542	16.4518	16.1356	17.1176	16.5712
ENSG00000261798	6.04632	2.63498	5.71449	4.09057	4.7489	4.09134	3.88227	3.94548	5.10288	3.50335	7.08093	4.2946	4.41537	4.23212	6.05952	2.63498	7.60875	4.4406	5.0569	4.17759	5.71479	3.72426	5.79188	3.97802	7.0124	4.97257	6.29363	4.16337	6.84174	3.67438	5.12093	4.74584	6.33606	4.48602	4.73628	4.88824	6.33957	5.61789	5.18056	4.43938	5.66938	4.81459	5.17312	3.99118	4.00001	3.58571
ENSG00000119772	15.2576	15.252	14.3073	14.5172	14.3647	14.4481	15.704	14.8156	15.0251	14.6815	14.6613	14.597	15.353	15.2383	15.4677	14.2073	16.538	14.4773	14.4219	14.9316	14.9256	14.7367	15.1721	14.2092	15.7749	14.5344	11.6147	15.2223	15.1976	14.1297	15.5645	15.036	14.0728	13.4133	15.4491	14.9103	15.3299	15.4334	13.9845	14.3632	15.6331	15.3689	15.2294	16.1365	15.9029	14.4274
ENSG00000171954	5.77869	5.35169	2.63498	5.72694	4.7489	5.83002	3.53024	4.43387	3.38318	6.21965	4.46271	4.62097	3.39984	5.46948	5.17949	4.88339	4.0436	5.94496	2.63498	5.25924	3.41407	5.33044	3.75971	5.28178	3.74566	5.16196	4.2079	4.98177	5.51682	5.22811	5.2623	5.78926	5.53503	3.91319	5.7056	5.67437	2.63498	5.09978	4.88748	5.31084	4.78518	5.48119	5.01307	3.99118	3.82749	3.58571
ENSG00000223561	4.35795	6.64536	6.33265	6.34866	4.36398	6.26598	8.11994	7.3251	6.2312	6.52383	5.0035	6.5626	6.38282	7.28817	6.68776	7.31628	4.77552	7.80989	6.00053	6.66341	5.4603	6.59222	5.25605	6.37161	6.72569	6.41514	2.63498	7.08523	4.59779	6.2129	5.12093	8.10189	5.53503	6.574	5.55079	6.97148	2.63498	7.3853	4.56357	7.11502	5.7549	6.32728	4.83125	7.43568	7.46361	5.98992
ENSG00000138735	14.6095	18.137	13.6705	15.1068	15.1838	17.2488	15.9604	17.0194	13.4655	18.0255	14.1444	16.7328	14.4901	16.0676	13.8572	17.4566	13.4935	18.2405	13.5338	15.6047	13.2255	16.6391	13.6485	15.8403	13.3573	16.5725	13.9802	17.0179	12.5352	15.017	13.6765	15.9924	14.6855	15.26	15.124	16.3931	13.8559	15.6766	14.4954	15.2298	13.7925	17.9052	14.9484	19.9288	16.2006	17.2088
ENSG00000279013	5.01179	3.9018	3.95424	3.62738	7.56065	4.66926	8.25053	4.78045	6.2312	4.39401	3.96767	5.16157	3.93128	5.03433	3.89993	4.38745	5.05899	4.4406	6.2701	4.7812	4.22599	3.95451	4.27534	3.97802	3.74566	6.50276	5.21633	4.98177	2.63498	3.67438	3.38979	4.74584	3.79775	4.73238	8.01796	4.71316	6.33957	3.90231	4.56357	3.87897	4.9138	4.04369	3.94625	4.59158	2.63498	3.58571
ENSG00000280186	6.14065	6.98856	7.15951	7.94325	4.65037	8.85246	5.85445	7.97147	5.06529	9.14336	6.63308	10.2753	5.77108	7.90495	5.41343	7.41693	4.17997	7.46258	6.34484	8.23397	5.33026	7.19713	5.56508	8.32312	6.0006	7.85361	6.7426	7.02989	5.65314	7.30164	4.32682	8.01613	5.55733	8.50083	8.34815	7.37307	5.68895	7.22181	6.14013	8.14803	5.48082	5.70793	7.02527	6.65281	7.67938	7.04863
ENSG00000131845	10.0734	13.0404	9.95834	12.3673	11.9567	11.9298	8.95779	11.527	12.4106	13.267	11.2297	12.393	10.6149	11.5927	11.0421	12.5673	9.73909	13.0589	9.21217	12.1322	8.96713	12.4718	13.1693	12.6046	8.97021	12.5771	6.81418	12.3441	8.40087	11.4088	8.6226	11.9032	9.42032	11.35	6.5795	11.2786	5.17659	10.8966	9.71964	11.7766	9.14265	12.7942	10.8678	14.0625	12.4614	11.7016
ENSG00000182220	18.9315	17.9656	18.9022	17.7197	18.2769	18.1679	19.7862	18.2404	18.544	18.2464	16.5669	18.0276	19.3663	17.5322	17.7308	18.4203	17.5923	18.432	17.8702	17.7142	18.5744	18.0576	17.9895	18.1917	17.5886	18.0597	18.1157	17.8955	18.1633	17.9698	17.0886	17.6147	17.1656	18.404	17.5998	17.4134	17.1426	17.7201	17.8277	17.6092	19.2789	17.8747	18.6671	18.3344	17.848	17.9058
ENSG00000166896	11.7962	12.5234	12.386	13.6964	11.9867	13.5542	11.6667	13.6017	12.3529	13.3522	11.6616	13.8166	12.0577	13.265	11.6168	13.1713	10.2261	12.9866	11.6712	13.0617	11.8432	13.8531	11.7149	14.7252	11.8273	13.5287	12.2382	13.2192	11.8219	12.6081	11.929	13.2952	11.491	14.6488	13.3469	12.3622	12.5352	12.8307	11.7529	12.8154	11.6899	11.8568	11.7772	12.0161	12.0608	11.9996
ENSG00000280007	7.11224	6.71738	7.16886	7.4946	8.35664	7.66897	9.61426	8.81813	5.13945	7.05238	11.1775	8.97826	6.70174	8.0799	6.60605	5.45088	8.47067	5.60058	7.94942	7.28662	7.63484	6.82337	6.70554	6.86035	8.52393	5.81758	6.91527	7.38985	7.54082	6.64963	7.43551	9.13192	8.39509	6.1644	5.0057	8.04857	7.16749	7.7534	6.17287	8.5348	6.82292	7.0299	6.12024	7.29336	5.67143	6.31757
ENSG00000275944	3.81956	4.47053	5.18636	4.52178	3.37568	4.52272	5.20548	5.47516	4.76752	5.05733	3.42225	5.16157	6.28643	5.61681	3.24599	4.09267	4.77552	4.13843	5.69053	5.63823	4.44548	4.84369	3.99655	5.28178	3.74566	4.32702	3.93898	5.35038	5.51682	4.60289	5.64154	4.27365	4.04156	4.73238	5.7056	5.67437	6.23948	4.76471	5.18056	7.18987	4.9138	4.97686	5.93652	3.61094	4.248	5.04114
ENSG00000185839	6.97901	7.57673	9.26753	8.62089	8.8639	9.27936	8.8893	8.40442	7.52961	7.85439	8.09775	8.88807	7.70619	7.28817	7.01321	8.6392	8.90499	7.84506	8.2686	7.42428	8.40892	7.89923	8.93312	8.1576	8.69862	7.87992	9.41275	7.23951	7.42059	9.27602	8.73879	9.11655	8.27788	9.48408	7.66523	7.58753	7.46962	8.74119	8.63656	7.28397	6.70031	7.83962	8.18332	7.2237	7.51476	8.825
ENSG00000257151	6.73017	12.2199	9.39428	9.078	5.08232	9.05284	8.9264	10.3096	11.6772	12.4736	10.42	9.32614	9.11574	9.36423	8.82106	10.093	5.84081	11.1903	6.99016	9.25644	5.71479	9.04548	8.55695	8.58459	11.82	9.67285	4.2079	10.8428	5.85446	8.74731	7.79916	9.03173	7.19274	8.47995	3.55502	10.9295	11.7118	10.3826	6.07228	9.13878	8.7013	10.7933	8.75408	13.0749	10.2939	10.5422
ENSG00000118094	8.44658	8.70365	12.1569	12.3191	2.63498	12.6339	8.75001	11.6528	13.1125	10.6645	6.76514	11.1036	4.19886	9.78583	3.96399	7.67438	8.56049	10.0775	9.39983	10.9387	5.83845	8.98333	9.25951	11.1844	6.54255	11.5631	8.24862	9.60926	6.38101	8.42222	5.64154	9.16216	4.60415	7.11194	7.51859	11.7097	9.70824	10.377	7.10309	9.99683	8.12681	9.49281	7.43012	6.99184	4.21573	8.93421
ENSG00000048162	14.8518	13.8483	15.4118	14.3648	14.5989	13.9742	14.702	13.9119	15.0232	13.4639	15.0205	13.8763	15.5825	13.9678	14.8384	14.6319	14.9691	13.3606	15.7418	13.4515	15.6395	14.2053	16.0013	14.1915	16.1455	13.7832	16.4227	13.437	15.6923	15.0655	16.31	14.0135	15.4646	15.9714	16.9696	14.3913	14.9354	13.3951	15.7852	15.3559	14.6586	13.9767	14.9636	12.634	14.6186	15.3317
ENSG00000135547	10.0555	10.1492	9.7503	7.07875	9.72714	9.26687	7.97161	7.75014	9.38278	10.525	7.19755	6.96788	8.19857	7.56298	9.48687	10.0005	8.93259	10.7316	9.49423	7.83955	8.35676	8.32394	8.71869	8.75363	10.3369	9.02111	7.66983	9.1598	8.53999	9.61173	7.36103	8.55378	6.80927	8.30698	6.8656	9.92791	6.69685	10.7952	8.79112	9.91845	9.46518	10.3027	10.4744	11.7253	9.76087	8.16522
ENSG00000168306	11.5769	14.1235	14.9865	13.49	14.4693	15.3156	14.0959	13.237	16.8819	14.6594	10.9238	13.9512	13.252	13.7364	13.3967	13.3997	8.77032	14.0363	14.6272	12.8212	14.2748	13.4255	12.7439	13.7732	13.5276	14.2477	15.135	13.9536	11.7458	12.621	11.5474	13.7689	10.7416	12.7402	10.6508	13.0396	13.8244	12.877	14.2268	12.7217	12.6857	13.6619	12.1164	15.1666	10.6567	13.3244
ENSG00000064102	15.134	13.366	15.3632	13.7154	15.3153	13.6812	15.4507	13.6616	14.5218	12.9906	15.3388	13.2341	15.9219	12.8497	14.3365	14.1923	14.3122	13.496	15.0177	13.6561	14.9073	13.7805	14.7728	13.7768	15.6431	13.713	16.6905	13.6096	14.9549	13.9312	16.643	13.3124	15.6132	14.5819	16.7737	13.3014	15.0478	13.7111	15.421	13.3343	14.7849	13.8526	14.7989	13.2839	14.593	13.7732
ENSG00000148426	11.489	11.621	11.4713	12.3585	12.6172	12.8741	12.3628	11.8329	14.4365	11.2789	10.8307	12.0654	12.8804	12.4189	12.7147	11.5256	12.9047	11.4653	11.8489	11.937	8.25083	12.1065	13.1693	12.6357	12.43	12.7691	13.4827	12.2999	13.2335	11.3708	13.0801	11.636	8.61739	11.5727	8.72754	11.9409	11.9918	11.8926	13.0921	12.5846	12.981	10.6682	12.5352	9.24285	10.3529	11.7398
ENSG00000115685	16.1333	16.4027	15.9759	16.6114	15.3106	16.9389	15.9284	16.4369	16.9431	16.5561	15.5461	16.5739	17.3394	16.3309	16.0021	16.7134	16.6902	16.5495	16.212	16.4195	16.3762	16.678	16.6105	16.4803	15.8554	16.1809	16.8026	16.3963	16.427	16.7892	16.2025	16.0233	15.8567	16.6535	16.1245	16.3085	16.4815	16.2893	16.5184	16.4718	16.3976	16.5759	16.3594	16.7445	16.6711	16.538
ENSG00000122566	21.335	20.8911	20.7272	21.1341	20.0703	21.4133	21.5447	21.378	21.4512	21.4283	21.815	21.285	21.8646	21.1546	21.6964	20.8085	21.8266	21.0397	22.0818	21.5434	22.0407	20.6421	21.8842	20.726	21.3581	20.4035	21.3434	20.9684	21.9993	21.7746	22.3254	20.6525	21.8492	20.685	22.2949	21.1784	21.2322	20.9669	21.7399	21.2484	22.1311	21.2781	21.9639	20.7506	21.6524	22.083
ENSG00000167332	7.79113	10.0537	7.65456	6.50327	8.06798	10.1395	10.4294	10.0242	8.95376	11.1957	6.02059	8.38673	8.00127	7.98178	6.68776	10.8747	5.42115	13.2044	8.64891	10.7791	5.02604	9.41661	9.88335	7.16717	6.38375	11.8061	5.88954	13.3882	5.51682	9.38173	7.79916	7.6396	5.83718	10.5993	4.48957	10.5623	5.62635	9.27311	9.21251	8.67579	7.82122	10.1912	8.37466	16.5037	11.0401	8.48825
ENSG00000255248	11.273	13.8658	13.1338	8.9656	11.7145	11.4424	12.1496	11.006	10.7038	14.6655	11.2823	11.2708	10.6792	10.2905	12.5258	16.0303	9.72459	14.5162	10.754	10.1099	9.47963	14.1333	9.81026	10.8846	9.98304	11.9642	7.90877	14.378	8.66685	12.0234	8.19585	10.4542	8.83708	13.7799	8.64987	13.0261	6.69685	12.2575	11.4034	11.8661	10.5782	14.5905	12.4872	16.0358	13.175	13.3431
ENSG00000130649	7.13519	6.71738	7.50031	6.15976	8.34926	4.84174	7.11817	6.60119	6.56801	6.52383	9.01322	7.08642	6.99316	7.05375	6.7114	6.41902	4.77552	7.12342	5.51853	6.01629	5.02604	5.83865	6.5143	6.37161	8.19307	6.67847	5.74917	6.94266	6.64067	5.60461	8.33841	7.07622	8.33926	5.17272	5.97184	7.36605	5.13151	6.66479	8.20116	7.53415	6.49907	7.0299	6.42883	7.43568	9.07201	7.07886
ENSG00000100029	17.6735	16.6846	16.9467	16.5611	17.009	16.4981	17.1705	15.9415	16.3231	15.9785	17.4203	16.1085	18.5996	16.5256	16.942	16.2148	17.4399	16.1189	17.6687	16.6741	17.6511	16.4139	17.8468	16.1538	16.7099	16.0139	17.9479	16.2426	17.7514	16.976	18.0673	15.8791	17.6745	16.673	17.8219	16.6278	17.4106	16.3296	17.2247	17.0766	17.5655	16.6147	17.6349	16.255	17.5254	16.8647
ENSG00000259248	7.59009	7.45593	8.59321	8.36734	8.70515	8.23239	9.6487	9.09647	8.90317	8.36142	8.96476	6.65335	8.98952	7.6664	7.22473	8.51768	8.81434	8.28997	6.86416	8.16587	9.27441	8.74818	7.9103	9.20272	9.02211	9.19086	9.79209	8.26099	8.31587	6.60023	9.01348	9.14207	8.84601	8.24645	8.76269	7.90583	8.87563	8.06938	8.71591	8.05779	8.83319	8.13115	7.6633	8.82584	8.53332	8.07827
ENSG00000211685	7.7397	9.87497	9.11896	16.823	9.20607	12.3538	7.43927	12.0379	3.38318	7.80284	7.49956	12.8128	2.63498	11.1291	11.7653	11.6583	10.3207	12.8126	8.07262	13.6814	3.9544	11.0399	8.06812	11.3357	5.88614	11.6115	3.57219	9.21963	10.2332	13.1613	9.58532	14.4455	13.2323	16.6528	4.48957	9.17202	6.01532	11.1051	7.55592	11.6295	7.15068	12.7428	9.80457	8.82584	11.2306	10.7297
ENSG00000228929	3.81956	4.55753	7.61411	4.91906	7.39099	4.92014	7.01151	5.64578	5.87652	5.20511	6.10319	4.01303	4.70809	4.05815	5.9572	6.85281	5.96235	5.48434	5.69053	4.68157	4.30374	5.55058	5.33095	4.37003	4.33478	4.4087	5.67336	4.27447	5.19584	6.35402	5.35949	6.27219	4.11175	5.77203	5.0653	4.45421	5.62635	6.9603	7.56208	4.52526	5.88177	3.79955	5.28188	5.18839	8.85709	6.69546
ENSG00000119471	15.8039	16.2096	17.1239	16.8124	16.9135	17.5373	16.7156	17.2744	16.1095	16.8338	15.7559	16.5961	15.8395	16.4481	16.1788	16.8784	15.9168	17.0729	16.7225	16.6916	16.5067	17.1952	17.0857	17.1879	17.1337	17.0011	18.7106	16.9972	16.4106	16.7106	15.9046	16.6274	14.7496	17.6441	16.3323	16.6322	16.5582	16.877	15.9701	16.905	16.0035	15.9197	15.9276	16.3468	16.8952	16.6871
ENSG00000132300	16.4441	15.9671	17.53	16.3347	17.9189	16.3417	17.7726	16.4571	17.2939	16.1427	16.8628	16.0165	17.4698	16.3982	16.6611	16.3418	17.7147	16.0312	16.2534	16.4032	17.0042	16.3719	16.1516	16.1412	17.2845	16.1818	18.0312	16.351	17.5151	16.2291	17.3796	16.3073	16.6971	17.013	16.1408	16.207	16.4419	16.5262	17.0008	16.3395	16.315	15.7341	16.7776	16.1482	16.1704	16.2529
ENSG00000172345	13.4575	12.9237	13.6455	14.9476	13.7085	14.8135	11.9783	14.3085	11.3367	14.2274	14.1659	14.2098	12.2203	14.9709	14.1227	14.2893	13.9446	13.457	13.1943	15.1315	13.859	14.3317	12.6315	14.7253	12.714	14.4778	14.8785	13.9486	13.9637	14.6457	13.4915	15.4273	12.9436	14.3098	14.3619	14.7782	14.4063	14.2874	13.0427	14.0559	13.2053	13.7654	13.6981	12.5498	11.7011	13.9276
ENSG00000175894	9.35667	6.08777	10.439	5.36788	8.08142	5.72824	5.62975	4.43387	11.1245	5.05733	5.51441	5.3399	2.63498	7.04353	9.79674	4.38745	12.2585	6.10958	3.65893	6.50644	4.44548	4.44561	7.1816	4.57383	8.91348	4.5573	3.93898	4.98177	4.85479	5.22811	7.41357	5.39954	3.79775	3.55309	3.9158	5.98359	2.63498	5.48459	8.84253	4.13738	8.31912	6.32728	8.17876	6.73538	5.58263	5.04114
ENSG00000126698	16.7218	17.0541	16.4623	16.4043	17.4961	16.7358	17.0138	16.9321	16.8154	17.2648	17.2394	16.5404	16.7361	16.4236	16.383	18.3494	16.8809	17.5013	17.5767	16.9736	17.1153	17.5358	17.5026	17.255	17.3566	16.8144	18.2539	17.0686	17.5271	17.2671	16.2743	16.363	16.8455	18.3627	17.1386	16.5304	16.5774	16.406	16.5385	16.6264	16.9238	16.9785	17.1314	17.9281	16.8307	17.2099
ENSG00000133226	16.9725	17.3991	16.2004	17.0334	17.3938	17.0223	16.8586	17.2267	16.4917	16.95	18.6902	17.1365	16.7523	17.1492	16.9196	16.746	18.1703	16.6923	17.5058	17.3618	17.9618	16.492	17.1946	16.346	18.4081	16.7653	17.0835	16.8588	17.5214	16.9676	16.9359	17.0126	17.984	16.5844	17.1114	16.8384	17.8294	17.0129	16.9429	17.6147	17.1582	17.4031	16.9044	17.6441	17.1998	17.6704
ENSG00000248309	3.81956	8.13746	3.95424	6.90521	4.15262	5.84953	4.63615	6.60119	4.167	7.95901	5.38677	5.88598	4.65473	5.46948	4.41691	9.07422	4.0436	8.27285	3.36645	6.66341	3.41407	7.27713	3.75971	5.96368	3.4298	7.34085	2.63498	7.76474	4.59779	6.62514	3.38979	5.56256	4.4612	7.6686	3.9158	6.25258	3.80505	5.61789	4.3327	5.77336	3.71934	7.99879	3.94625	9.21086	4.67283	7.05625
ENSG00000162076	13.2008	13.7591	12.9889	13.8774	13.4642	14.2594	12.8799	13.9068	13.7587	13.3635	12.1175	13.5767	13.7779	14.1496	13.2381	14.0198	12.0254	13.6951	13.9801	13.5856	12.3185	14.5066	13.0938	14.4996	13.1968	13.958	14.1671	14.116	13.7668	14.0534	12.54	13.8636	13.3593	14.6942	14.0278	14.1194	13.5299	13.1859	12.9622	14.2335	13.3616	13.6379	13.988	13.969	14.3516	13.522
ENSG00000182667	14.5721	13.3132	13.6467	8.01751	11.7986	11.3549	11.0961	9.5304	12.831	12.8939	12.8219	9.69931	12.4565	9.7627	14.345	12.2366	12.7596	13.4765	13.5488	10.094	12.713	10.8227	11.8432	9.04973	10.6875	9.8328	9.33906	12.4169	8.44465	10.1248	13.0373	9.78776	10.5238	9.93888	10.4962	11.3739	3.47336	8.81671	13.5804	11.546	12.3917	12.2366	15.2056	15.2967	15.1873	11.6992
ENSG00000130520	17.261	16.5275	18.0508	17.6006	18.2324	17.7722	17.7522	16.6414	18.0657	16.8912	18.3928	17.4168	18.4768	17.319	16.7953	17.679	17.1705	17.0368	17.5983	16.9963	18.094	17.936	18.5834	18.1337	17.5606	17.2438	19.1146	17.2535	18.1654	17.7663	18.1063	17.1164	18.4375	18.5497	18.0464	17.4451	18.1674	17.1751	18.3522	17.5805	17.7097	16.8269	17.6094	16.0432	17.6567	17.381
ENSG00000215301	19.702	19.7708	19.8436	19.7021	18.6486	20.0377	20.7589	20.4267	19.1502	19.8907	20.3798	20.7932	20.2475	20.0346	19.0475	18.9602	19.524	20.0648	19.25	19.4523	19.7787	18.8528	19.3314	19.1731	19.6116	19.3141	19.2838	19.4883	19.2129	19.5951	18.9577	19.5089	19.7535	19.4398	19.4293	19.5948	19.9558	19.4045	19.7298	20.1852	20.3129	19.794	19.5261	19.6801	19.3136	19.9585
ENSG00000229117	20.0452	20.4123	21.5337	21.1868	23.4378	20.9348	21.3418	21.0852	22.4875	21.0858	20.8716	20.3198	20.3743	20.5581	20.9765	22.8252	21.4506	21.4884	21.2143	21.2714	21.1708	22.1091	21.9865	22.1895	21.9451	21.7325	22.8485	20.8195	21.119	21.2592	21.2687	20.9035	20.7888	22.6293	21.8455	20.6079	21.5755	20.4792	21.1376	20.4774	20.7861	21.0342	20.6658	21.2619	21.9988	21.2377
ENSG00000249741	3.95082	4.92099	4.37648	5.92361	4.22742	4.35659	4.95112	4.21553	2.63498	5.15762	3.73535	4.2946	2.63498	4.57965	5.33289	4.09267	3.79947	5.54367	4.57632	5.35637	2.63498	4.63162	3.61494	3.60116	4.77889	5.02247	4.60984	5.15212	2.63498	5.98063	4.01057	4.49829	3.88565	4.65545	4.29281	5.21393	3.65492	4.37756	5.24487	5.70615	3.41054	4.56103	5.21034	4.68285	4.42499	4.90763
ENSG00000227372	11.489	14.3454	9.8993	11.8359	10.1511	11.9044	10.3259	11.7572	9.37166	13.7947	10.2051	11.998	10.4679	13.3334	13.039	13.2634	11.1722	14.0302	10.6399	13.16	9.59665	12.4998	9.89392	11.6538	10.5768	12.3776	8.12072	13.5276	9.88845	12.2948	10.0133	12.8194	10.2199	11.2159	7.73773	13.0062	6.97016	12.8596	10.5703	12.0996	11.5507	14.0054	12.2612	15.7383	12.4545	13.2707
ENSG00000100628	10.2904	17.3483	10.2062	12.9596	11.1749	12.7189	10.7467	13.0949	10.969	16.223	8.51921	13.0682	12.052	13.496	10.2503	16.0137	9.53131	16.6986	9.80696	13.8543	9.28518	15.4446	9.82927	12.9139	9.2973	13.7457	8.70338	16.2672	10.2526	14.2548	8.49968	12.8726	10.8866	14.7513	7.48738	14.8456	8.63845	12.1894	9.37671	12.2595	10.5501	16.4227	11.5914	19.0673	13.1025	14.7579
ENSG00000158481	7.7397	8.87426	6.50551	10.2407	10.0443	9.28822	7.6786	10.48	7.44007	11.109	5.57409	8.79186	7.39724	10.6761	10.1887	12.3308	8.1582	11.7536	7.22108	12.7025	6.75017	11.088	8.8393	10.8988	6.94591	9.73357	7.32322	10.3777	7.1143	10.4277	5.12093	9.42169	7.1428	10.2506	6.5795	10.1837	4.82376	7.22181	7.59846	9.36252	5.7549	7.14346	9.39761	10.4665	8.80007	10.1629
ENSG00000173272	14.6335	14.7892	15.083	14.5546	16.9135	14.4575	15.8607	14.796	15.2534	14.486	14.6886	14.1048	15.9259	14.8675	15.1044	14.9659	15.382	14.8865	14.4809	14.562	16.2823	15.3272	15.9459	15.3838	15.0687	15.178	16.6328	14.5861	15.4933	14.5619	16.1719	14.402	15.2529	15.0608	16.531	15.2393	16.3254	14.9546	15.5903	14.6142	15.1164	15.0542	15.4563	14.9411	16.4859	15.0558
ENSG00000075914	14.3606	13.9822	14.916	13.8575	14.5773	13.8836	14.9763	13.7766	15.5029	13.9373	15.4065	13.338	15.1915	13.8624	15.2313	14.8006	14.8041	14.0476	14.712	14.0063	15.2315	14.0746	15.8223	14.171	14.2939	13.958	15.639	13.3961	15.4513	14.7151	14.8816	13.4297	15.1972	14.7346	14.3862	13.7503	14.8877	13.4836	14.599	13.7879	15.0404	14.3578	14.8291	14.0117	15.5593	14.4462
ENSG00000253755	13.4688	12.2704	14.8082	13.6518	15.2712	11.7079	12.1206	15.1238	7.01298	11.024	13.9806	11.739	7.90768	11.6543	20.5364	13.651	16.1488	12.9628	12.803	17.9537	9.63083	12.9021	13.1315	13.1882	13.6759	13.1735	8.37792	12.773	14.9577	13.9879	11.8558	14.2165	14.8181	11.7229	12.5813	10.978	6.98255	10.0001	8.83494	4.24692	13.3647	16.5723	19.3503	11.5368	19.8217	11.2998
ENSG00000108469	14.496	13.499	13.5869	14.495	13.7946	14.1237	13.956	13.794	14.2715	13.6591	14.5422	14.4124	14.5357	15.0454	14.1259	12.3379	15.1013	13.3397	14.6846	14.5256	14.2021	13.3813	14.2366	13.915	13.8331	13.8922	13.7874	14.065	14.672	13.5128	14.1514	14.6532	14.7444	13.117	13.7458	14.4381	14.6294	13.9876	13.4842	13.5324	14.906	14.0364	14.4231	13.6116	13.7802	13.6562
ENSG00000169981	11.273	11.5643	11.9724	11.7308	11.1142	11.0799	13.1986	11.301	12.5992	11.2064	12.2924	11.6547	11.0718	10.7343	11.0502	12.4267	11.0992	11.6962	11.238	11.1566	11.0198	11.8435	12.0882	11.1407	11.2854	10.7258	13.0198	10.9857	12.7253	11.8569	10.6853	11.0525	11.5171	12.656	12.1249	10.7844	11.8929	10.5761	11.3279	12.3376	10.9237	11.2406	11.4289	11.6961	11.9625	11.8467
ENSG00000197444	7.19102	10.9747	5.57887	11.6937	3.37568	11.25	4.78054	11.2269	8.59745	11.185	3.42225	10.0381	10.2522	10.2038	11.2857	10.3612	14.3873	12.4277	5.80162	10.7684	7.70073	9.30672	8.34422	6.89591	6.2972	9.1856	5.5932	11.8878	4.27445	9.50047	12.2778	9.18689	6.41058	10.6597	2.63498	11.0919	5.62635	12.651	5.55316	11.4114	7.19367	10.0398	7.07522	12.2408	5.05954	8.67263
ENSG00000007952	20.5438	17.5279	19.338	17.364	13.1174	16.6914	20.6424	17.7847	19.1551	17.2113	15.4707	16.966	20.9471	18.4246	17.5578	17.9318	18.4364	16.7481	18.6604	17.7203	19.2449	17.4746	19.4307	18.5946	13.5729	17.49	15.403	17.0117	19.8199	18.0914	15.764	17.3801	13.5509	13.8032	18.2726	17.6958	16.5397	17.5144	18.6924	18.3143	19.1695	17.3403	17.8806	13.3114	11.0029	17.9513
ENSG00000137440	10.8203	16.1558	15.4057	12.6552	9.43438	13.647	10.4768	12.087	12.5325	12.8893	13.6398	15.7984	12.3927	14.1408	10.9295	16.4631	11.1384	12.2142	10.702	13.3679	11.1067	13.1911	11.6079	12.7853	7.85017	12.5037	12.6301	13.0815	9.71294	16.1792	10.2827	13.5956	16.6797	13.6565	2.63498	13.2895	12.106	14.8616	12.4666	15.6679	10.2401	14.6257	11.2608	11.7159	4.97294	17.184
ENSG00000158483	12.9902	11.9541	12.6667	11.8622	11.0507	11.915	11.6237	11.5952	12.4013	11.0119	12.5366	11.4198	13.8373	11.5958	12.4726	11.8659	12.3891	11.6986	12.3176	11.7234	12.5218	11.8659	12.0559	11.3525	11.6842	11.383	13.2852	11.7515	12.7852	11.9216	11.7398	11.4126	13.042	12.4882	12.7176	11.811	12.972	11.6918	12.5668	11.8398	12.2598	11.8291	12.4278	11.9674	13.0111	11.892
ENSG00000275894	5.65555	4.47053	4.84329	3.34349	5.93466	3.34388	9.07696	4.43387	4.167	2.63498	9.32614	5.16157	4.9892	3.72858	5.17949	4.38745	4.60682	3.72101	5.43777	3.68945	4.22599	2.63498	5.09267	3.60116	5.06642	2.63498	3.93898	2.63498	5.69578	3.67438	5.8761	4.27365	4.24017	2.63498	4.73628	4.88824	3.47336	5.48459	4.56357	4.94572	5.13882	3.46932	4.21643	3.99118	4.57948	5.62636
ENSG00000232806	3.48403	4.71537	4.2258	5.49813	7.19861	5.36909	5.23821	6.42726	4.76752	5.83215	5.88689	6.77952	3.39984	5.46948	5.66333	7.68248	4.60682	5.94496	4.34424	3.91316	5.33026	6.43007	3.99655	5.28178	5.50497	5.47636	3.57219	5.81647	4.27445	7.20604	5.39042	6.58803	3.79775	7.19128	3.55502	5.55405	6.867	5.85154	5.78423	4.13738	3.71934	3.46932	2.63498	3.99118	3.48986	6.72447
ENSG00000165195	13.3303	12.4747	14.4089	12.7364	14.1444	12.8237	15.9527	13.4763	12.6426	12.3972	13.9698	13.1248	14.2512	12.4892	12.5258	12.8247	12.0906	12.1961	12.6058	12.4282	14.6774	12.1587	12.762	12.3073	12.526	12.3999	12.6537	12.2182	13.4752	13.3246	12.1051	12.9436	13.0169	13.2823	12.9548	12.2509	12.311	12.6078	13.885	13.4004	13.8519	12.0185	12.5868	11.3413	12.6096	13.2642
ENSG00000070444	15.0662	15.5668	14.9076	15.1237	14.801	14.5461	13.3778	14.168	15.4266	14.6934	16.2353	15.2823	15.3481	16.0782	15.2946	13.993	14.7839	14.5429	15.003	15.0563	14.6167	13.8039	14.2849	13.9815	14.5013	14.3733	14.9539	14.735	14.9693	14.8221	15.4184	15.1857	16.2062	13.5217	15.3066	14.8696	15.4048	15.1517	15.5573	16.3311	15.219	15.6846	14.8259	16.2976	15.6451	14.7028
ENSG00000218227	5.77869	5.60418	8.17833	8.36734	9.71426	7.07205	9.05032	7.42074	7.47517	7.31698	7.46897	5.99476	6.84362	5.1172	7.58953	8.40959	8.49934	6.80339	7.77223	7.27048	5.83845	6.81146	7.07921	7.09256	6.86424	6.45084	7.38319	5.6777	7.26165	8.54109	8.72995	8.11741	6.74368	7.78388	7.88864	7.59955	7.57143	8.91672	11.4352	6.63253	7.65114	7.25882	8.40227	7.05742	9.81403	8.25053
ENSG00000066697	12.9148	13.2329	14.0302	11.6996	14.9706	11.9705	13.5587	11.9566	13.9597	12.4906	13.8768	11.4142	12.556	11.9722	13.3581	13.5139	12.7917	13.0836	13.0736	12.2629	13.2731	12.7875	14.0321	12.6109	13.243	12.5037	14.4808	12.1546	13.2097	12.6761	12.9789	11.862	12.328	13.6636	13.7961	12.4767	12.8908	12.2628	13.6349	12.3758	12.441	12.8944	13.6055	13.7998	13.7372	12.3413
ENSG00000083444	17.8391	17.4617	18.4296	17.1752	18.1214	16.855	17.6802	16.5418	17.2318	17.1083	17.2534	15.9611	17.5867	16.7321	18.1372	16.4162	17.3053	17.6072	18.8724	16.7442	18.037	16.627	17.56	16.6002	17.5469	16.4237	19.0357	17.4397	17.2466	17.3684	18.0843	16.4001	16.3719	16.0866	17.722	17.1174	17.6596	17.535	17.8185	16.5745	17.5763	17.9217	18.0815	19.0963	18.2822	17.1224
ENSG00000246526	6.97901	5.6791	7.39277	5.72694	7.56065	5.83002	6.25039	5.47516	7.58848	5.83215	9.7321	5.3399	5.29054	6.06746	6.57202	6.41902	7.14692	5.35747	7.16468	7.4603	7.93228	6.82337	7.04701	7.40762	5.06642	6.67847	7.60082	5.6777	6.64067	5.83774	5.64154	5.65193	7.38905	7.54327	8.26478	4.56426	9.1522	5.3679	6.49071	4.68114	7.09991	6.60689	7.48284	5.50883	6.27468	5.81984
ENSG00000255458	3.81956	4.98297	5.02577	4.52178	5.22233	3.8399	4.63615	4.78045	4.76752	4.39401	4.70679	4.2946	3.70469	3.95963	4.57341	4.62398	3.79947	4.13843	4.7259	4.39174	5.02604	5.0262	4.27534	3.97802	5.06642	4.5573	5.41757	4.46952	3.61437	3.67438	4.63125	4.74584	3.79775	4.17762	5.845	4.12507	5.49204	4.61308	4.12451	4.43938	4.34571	5.16647	4.21643	4.59158	4.78071	4.44914
ENSG00000007312	9.36881	10.015	8.7129	14.1315	12.0553	10.8397	7.60112	12.4122	7.93944	12.8561	8.48143	12.4298	7.28582	12.8704	15.2079	11.9114	10.6199	12.3447	8.78588	16.8237	8.01229	13.3492	9.53325	13.0656	10.6507	12.5197	8.8549	12.5157	9.52478	13.9357	7.46425	11.7189	10.5445	12.0814	8.31301	13.1746	8.53313	10.8966	11.9568	12.2924	8.83125	11.0883	11.4042	9.27759	10.1554	10.9172
ENSG00000145982	13.0627	13.2507	13.3743	13.5576	13.2385	13.7123	13.3423	13.3015	13.3522	13.5259	13.5112	12.7276	13.1746	13.6622	12.7241	13.8935	12.9992	13.8563	12.8226	13.38	12.3657	13.9764	13.4428	13.9021	12.9819	13.3013	14.3857	13.8129	13.8705	14.0273	13.7106	13.2672	13.5065	14.4775	13.0893	13.4208	12.9999	13.5402	13.3998	13.8258	12.9489	13.4621	13.346	13.58	13.7966	13.6342
ENSG00000274979	5.77869	3.9018	8.25046	4.84068	9.51084	5.61849	8.86658	5.47516	4.167	4.89127	13.3705	5.16157	6.77443	5.58857	7.461	2.63498	5.18099	4.13843	7.48062	6.80486	4.22599	4.44561	9.46802	4.8286	10.1134	4.32702	11.3129	5.35038	9.78767	3.89524	8.97908	5.25369	9.16067	3.91319	10.221	5.42235	9.67245	6.7126	10.9194	4.13738	6.62137	5.73751	8.07964	3.61094	8.45391	3.78952
ENSG00000181381	15.4755	14.5992	14.0511	14.3665	13.0316	15.7877	16.1773	16.3927	12.4959	14.1041	14.601	15.7222	12.5698	14.3764	13.1966	13.1713	13.3586	14.7417	15.0792	14.7267	16.0607	13.9081	13.7385	14.6977	14.4152	14.2361	13.7495	14.6195	13.5004	14.5433	14.5478	15.2024	14.2264	13.9152	10.1059	15.1108	15.2778	14.6571	13.9164	15.2075	14.008	14.5083	13.7453	12.3083	13.2883	15.0218
ENSG00000112303	9.24264	8.49487	11.3652	11.5711	11.2257	10.0444	7.6786	11.11	5.3712	12.7581	9.93296	10.1892	8.60188	9.93673	11.7888	11.8272	9.87218	10.1448	7.57632	13.4222	6.59201	10.9695	8.30399	10.7359	10.7341	10.7002	8.62616	10.8155	8.66685	11.1657	6.5908	10.4684	8.64324	11.7207	9.74652	9.10407	5.17659	9.31615	8.12428	9.53959	8.83125	12.5048	8.86593	7.96559	7.68201	10.8998
ENSG00000142552	15.7745	13.1819	15.6318	13.2072	16.3447	13.2298	12.4364	12.8654	13.6425	13.1873	11.9582	13.9477	13.4803	13.957	16.2427	13.036	14.8201	13.7127	14.8804	12.7971	13.873	12.4375	13.8078	12.9303	14.6168	13.2236	12.1349	14.2115	13.8103	13.722	15.2873	14.1819	12.5525	12.3951	14.3962	14.969	10.3169	14.5791	15.4167	13.6187	15.1466	14.6334	16.4488	14.555	16.4118	12.8952
ENSG00000149923	17.2403	16.8876	17.6941	17.5243	18.4254	17.4424	16.9251	16.8774	17.6136	16.4902	17.3533	17.2268	17.5802	17.2239	16.4742	17.7601	16.4777	16.7744	17.185	16.9736	17.4918	17.9862	17.6292	17.9503	17.7842	17.1764	18.6563	17.1352	18.1731	17.6376	17.9246	17.2134	17.3077	18.4578	17.4888	17.2517	17.3239	17.0109	17.3493	17.4852	17.4803	16.8201	17.7542	16.1737	17.0153	16.8134
ENSG00000188385	5.65555	9.546	5.02577	3.62738	4.5981	6.84062	5.39108	5.99895	4.94575	8.7397	6.90906	7.24041	4.80864	6.44042	6.9941	7.94753	5.92868	8.88728	5.196	6.16435	5.57917	7.21529	5.1354	4.8286	6.48113	6.41514	3.57219	8.23068	4.59779	6.38357	4.78388	6.23448	7.1428	4.48602	4.73628	8.62893	4.05019	5.61789	6.56638	5.77336	5.57828	9.63719	5.79928	10.5371	5.9531	8.59648
ENSG00000272079	11.4801	10.5253	9.61858	11.5172	8.97365	11.3409	10.7328	11.7154	6.984	11.0976	8.49666	11.1692	9.27615	12.3146	9.23938	9.65641	8.84147	10.5799	9.3574	11.0841	9.94249	11.5427	10.1661	11.0102	10.5133	11.2047	9.58329	10.8696	10.896	10.0962	9.67709	11.4168	8.42818	10.8312	8.61182	12.216	6.78445	11.3403	10.0301	11.5371	10.9778	9.69968	10.7032	8.13436	5.83374	10.4601
ENSG00000149925	22.2949	22.9511	23.5605	23.2383	22.7367	23.5683	21.5131	22.992	22.4036	22.7986	22.6933	23.5347	23.3709	23.1274	21.8281	22.6971	21.3626	22.8556	22.6501	22.516	22.9239	22.8812	22.6285	23.0498	21.6694	22.4801	23.9376	23.2197	22.8217	23.5849	23.3582	22.5407	22.345	22.9196	23.3244	22.7875	22.0732	22.7111	23.2817	22.9676	21.967	22.5471	22.1698	23.2847	22.323	22.8887
ENSG00000144959	16.3854	14.8157	16.2301	15.557	15.4126	16.6834	16.6087	16.9879	14.553	16.1623	16.7566	17.3008	16.9726	16.086	15.4384	14.6312	15.1125	15.2842	16.2652	15.5398	16.1147	15.2886	16.6109	16.1868	14.3233	15.3948	15.9882	15.824	15.9481	15.8159	16.124	16.4889	15.3774	15.8933	15.3944	15.3416	15.8804	15.459	15.328	14.9046	15.8339	14.2168	16.0213	12.8213	14.8356	15.3282
ENSG00000197893	7.56498	7.7494	3.95424	8.01751	5.08232	7.61927	3.15733	6.22917	4.37998	7.85439	7.99421	6.51497	2.63498	9.97077	2.63498	6.9502	3.31927	6.6786	3.36645	11.1631	4.93792	10.2787	5.68306	11.7429	3.9799	11.9221	5.88954	6.33596	5.31135	8.6926	3.38979	10.1616	6.25744	5.83995	10.2722	5.27678	9.90936	7.10149	7.58643	6.7854	4.1362	6.9321	4.43487	3.99118	10.7408	9.34895
ENSG00000159733	13.5772	13.8212	11.915	14.8549	11.0421	14.4598	9.03907	14.5247	13.0821	14.326	13.6734	15.5892	12.2642	15.5184	12.1816	13.4107	10.7739	13.4118	13.9089	14.2704	11.4797	14.0884	12.8673	14.8076	13.1932	14.0541	12.6062	13.9536	11.6362	15.2027	11.4726	15.2546	14.1252	13.8292	13.6523	14.4013	11.5731	14.2021	12.8048	14.3848	12.2404	13.7638	12.7978	12.4018	12.6985	13.5146
ENSG00000117602	14.557	14.3832	13.5709	14.2034	13.6	14.4916	16.0063	14.4722	14.2796	14.7251	14.9976	14.3952	14.9936	14.5654	14.0139	14.0817	14.1372	13.8346	14.4364	14.6918	14.9317	14.6159	14.76	14.563	15.3103	14.4662	14.0076	14.0405	14.2176	14.4269	14.6858	14.1029	14.6424	13.521	15.8932	14.4501	15.1118	13.7075	13.9925	13.677	14.6603	14.164	13.9208	14.248	14.1445	14.3514
ENSG00000054983	15.3053	14.896	13.4311	14.893	14.965	15.9038	15.6724	15.6807	13.6477	15.5077	11.3159	15.6249	17.7598	15.9138	14.6553	14.2612	13.751	14.7256	14.0637	15.9023	13.2931	15.6773	12.1855	15.3032	13.3521	14.6764	10.7505	14.3003	15.1865	14.4311	15.3792	15.6115	13.9973	15.2169	10.3275	14.3906	13.1829	15.6095	15.9635	15.7051	14.6359	15.2029	14.5566	14.3334	13.8945	14.9491
ENSG00000112200	14.8421	14.9188	15.2363	14.4618	15.0684	14.6839	17.5049	15.0658	15.5614	14.83	16.3279	14.9339	15.0781	14.5582	14.7744	15.113	14.9199	15.0067	14.9491	14.5982	14.8169	14.6915	14.5265	14.657	15.542	14.8614	14.7125	14.4165	15.582	14.1392	14.5952	14.8334	15.078	15.1182	14.8085	14.5295	14.8561	14.709	14.9321	14.5611	14.8039	14.7271	14.5187	15.3472	14.8396	14.4243
ENSG00000101236	14.8662	14.0264	15.5742	13.7689	15.1705	14.1621	15.801	13.6335	14.082	13.7689	15.3088	13.7658	13.3811	13.3168	15.9934	14.0183	13.6147	13.1658	14.311	13.1496	15.8263	12.6382	14.5978	13.0852	14.8452	12.9176	14.676	13.8777	12.6916	13.3132	15.8876	12.7692	15.0308	12.3698	16.1851	13.1787	15.0149	13.8792	15.226	14.24	15.3658	14.2274	15.1247	14.3455	16.5126	12.9092
ENSG00000113360	16.4696	16.1683	15.4546	15.961	13.5261	15.9342	16.1128	15.8215	16.2876	15.8719	16.556	15.8568	16.6324	16.072	16.1646	15.0054	16.4645	15.7157	16.5383	16.3077	16.58	15.2079	16.0111	15.2062	15.7551	15.5338	15.7296	15.83	16.3983	15.5051	16.8222	15.6802	16.9253	14.9803	16.3147	15.8177	16.2814	16.0441	16.5389	15.9657	17.1347	15.9941	15.7822	16.4032	16.8954	16.1124
ENSG00000099385	15.1461	15.7294	15.9371	15.4188	15.6115	15.2729	15.8804	14.5824	15.312	15.4541	14.7405	14.7079	16.0937	15.253	14.7327	16.1388	14.6957	15.932	15.6203	15.0761	15.9645	16.1039	16.219	16.0356	16.3037	15.4463	15.5836	15.3685	15.8718	15.2348	15.7086	14.804	14.7202	16.5201	15.8508	15.5481	15.5358	15.1069	15.2455	15.3452	15.9103	15.6074	15.4867	16.1011	15.5806	15.3095
ENSG00000161904	16.229	15.4627	15.3322	16.2052	14.3941	16.0933	15.3646	15.6172	15.9218	15.3258	15.5761	15.9256	16.3953	16.2034	15.6112	14.6952	16.1344	15.232	16.2029	15.6439	14.4783	15.398	15.9005	15.7908	15.9194	15.5426	14.9106	15.7967	16.769	15.9753	16.433	16.0471	16.0638	15.3912	15.6432	15.9062	15.8557	15.7307	15.7023	15.8801	16.1597	15.7634	16.0696	15.2127	16.3073	15.8955
ENSG00000186265	6.04632	7.3125	6.50551	9.16318	9.13912	9.42137	6.85573	10.5609	4.76752	9.14336	7.42183	9.75139	4.19886	8.02391	11.064	9.10468	7.24515	9.0568	4.57632	10.7364	6.75017	9.73372	7.93393	8.66902	6.0006	9.52243	5.5932	8.97111	6.40667	9.23429	5.64154	9.57194	7.33926	10.1584	5.17715	8.15827	5.34333	8.01814	7.3075	8.74763	5.57828	7.40256	7.91413	5.3037	7.15759	7.07136
ENSG00000170325	13.161	13.1555	12.5155	13.5188	12.6596	13.3063	13.4774	13.411	13.5194	13.0999	13.9393	14.3206	13.2553	13.8213	12.5258	12.7258	13.0278	12.6724	13.1238	13.8881	12.5684	12.3347	13.2879	13.1303	12.6414	13.0624	12.8872	13.2908	13.0809	13.4086	12.9227	13.6106	14.7673	12.5508	13.7288	13.123	12.603	13.554	13.6322	13.0413	13.1373	13.2337	12.8144	12.7271	13.1543	14.0011
ENSG00000211679	17.0428	18.6666	18.0653	22.7985	19.2839	20.9401	15.8578	23.4911	8.45718	19.4659	16.6889	20.9745	10.1527	20.2723	22.4136	20.6617	19.7042	21.5487	16.9688	22.6313	14.1436	20.6039	18.1177	21.1151	15.2104	19.6002	11.9753	20.8627	17.8873	20.6774	14.8787	21.8002	20.2759	22.7044	14.8503	18.8957	15.5508	20.8142	19.4772	21.5857	16.3797	20.6804	24.2361	16.3188	22.1864	18.599
ENSG00000104142	14.481	15.734	14.4722	15.3392	14.4068	15.6299	13.7045	14.9819	14.9878	14.9712	14.1581	15.1766	14.2615	14.9316	14.2902	14.3139	14.4534	15.3451	14.1074	14.9645	15.3437	14.624	14.8845	14.4921	14.1898	14.4647	15.7853	15.0868	14.7105	15.2494	14.6464	14.6279	14.9081	14.1921	15.0035	14.9116	14.6631	15.0945	14.7329	14.9232	14.3106	15.4115	14.7829	16.3531	14.5623	14.1166
ENSG00000261504	4.84786	4.16424	5.83814	4.09057	4.15262	3.8399	4.06166	3.94548	5.24362	4.39401	4.46271	3.62721	3.93128	4.23212	5.05826	5.96354	4.46372	5.06198	4.57632	4.17759	4.68784	3.95451	6.032	3.60116	4.25585	4.32702	4.2079	3.54413	4.27445	5.0879	3.91493	3.4392	2.63498	5.00146	4.73628	4.33331	3.47336	4.94278	4.56357	3.87897	4.48168	4.56103	7.01507	5.68754	5.37274	4.59137
ENSG00000156467	17.5931	18.4342	17.727	18.4136	18.2667	18.879	17.969	19.2428	18.6962	19.2379	18.1409	18.6162	18.7753	18.1802	17.7236	19.3228	18.8284	19.1514	18.7917	18.3193	17.201	18.8451	18.6662	18.6063	18.7144	18.3403	19.4409	18.4868	17.1892	18.594	18.0543	17.9454	17.9488	19.2225	18.8624	18.4713	18.1653	18.0892	18.3669	18.365	17.7145	18.5237	18.525	19.5478	17.5361	18.9362
ENSG00000256566	2.63498	5.75021	5.9298	4.09057	8.35664	2.63498	7.86859	6.89616	3.90416	2.63498	4.46271	2.63498	4.19886	4.23212	6.53715	6.76373	6.2063	4.4406	4.62816	4.2534	5.02604	5.10889	5.56508	5.04174	6.57229	5.78977	5.50816	2.63498	5.85446	4.75396	7.20793	6.32695	5.34236	6.29046	5.12238	4.33331	5.62635	2.63498	6.73971	4.75249	6.77513	4.04369	5.0549	5.846	5.38601	4.1016
ENSG00000165716	8.5224	12.5678	10.5636	9.23996	9.06215	9.86663	7.91856	8.91153	10.3402	11.5633	8.07763	10.2247	10.9218	10.4428	10.7774	10.9079	8.99432	12.3549	8.2571	9.92408	7.60073	10.9343	7.99137	10.2625	10.2399	11.1652	10.5613	11.8121	8.95757	11.0559	9.51331	10.1541	8.70098	9.47092	8.65923	11.2916	7.21023	10.5119	11.7154	10.9855	8.51802	12.0107	10.3883	13.3558	10.2179	10.6826
ENSG00000204314	8.57362	11.8978	9.60145	10.9229	10.1037	10.6075	7.34732	10.3973	8.41446	11.4351	8.94824	9.9247	8.15851	10.2061	9.38316	10.5142	8.27559	11.7419	8.33572	9.46733	8.13649	10.8116	8.6202	10.1929	8.38058	10.6562	9.3085	11.7536	8.53999	10.2215	7.5269	10.3287	10.7163	9.41152	10.6055	11.5629	9.51969	10.9756	8.39274	10.6659	8.33564	11.6344	9.52323	13.6929	10.9406	9.77339
ENSG00000224870	13.4707	13.1075	13.2667	14.0238	13.3027	13.8262	13.5026	13.3712	14.6043	13.1269	13.2794	13.4072	13.3338	13.4854	13.1833	13.4838	13.8536	13.0545	14.515	13.9378	13.2769	13.3233	14.9364	13.841	13.5499	13.6619	13.7741	13.0021	13.6617	13.614	12.7737	13.4243	13.1557	13.7305	14.1859	13.6898	13.7907	13.2612	13.3189	13.0778	13.9137	13.7238	13.5949	13.3388	13.5609	13.019
ENSG00000204308	16.2857	16.6018	16.7879	17.0704	16.1154	17.4091	15.4703	17.1872	16.921	17.0874	15.9889	17.5817	15.8646	17.0234	15.3429	17.3105	16.5779	16.8283	16.3698	16.7204	14.7693	17.662	16.3034	17.628	15.9925	16.7015	16.3433	16.936	16.4163	16.7394	16.0229	16.8201	16.0329	17.98	16.2642	16.7612	16.0522	16.3863	16.2945	16.9266	15.8486	15.9105	15.847	16.7837	16.6229	16.4627
ENSG00000132964	15.4436	14.8709	15.218	14.1565	14.6285	14.3698	15.8898	15.0469	16.5812	14.3866	15.074	14.4104	15.8059	14.0889	15.1303	15.7119	15.2358	14.7121	15.343	13.864	14.8244	14.745	14.992	14.238	17.1461	14.4078	15.9341	14.747	16.5163	14.6577	16.3403	14.0961	14.1747	14.5637	15.0601	13.8862	13.9734	14.2343	15.9391	13.5198	15.5764	14.837	15.7195	15.2292	14.155	14.4304
ENSG00000226232	10.9027	8.89762	11.2816	9.89543	10.4188	8.16473	9.89063	11.7434	8.41807	8.65506	11.4383	10.3448	8.99459	11.5605	9.4948	6.297	10.123	8.05988	10.3219	9.98585	9.96544	8.028	10.3529	8.97293	12.2297	10.5609	9.89647	9.4813	11.1922	8.80818	10.1848	12.0869	11.4195	8.04079	9.07382	10.0235	13.3422	10.3109	10.1277	9.3271	11.2946	10.0831	10.0386	6.5876	8.99895	9.07928
ENSG00000183570	11.3118	11.0001	11.9909	8.9656	9.22637	9.09987	7.72429	9.99349	10.8711	11.0869	8.41082	9.38667	11.1091	10.0197	10.769	11.5435	9.78406	11.3041	9.12422	9.61824	6.67327	9.71473	6.5143	8.75363	11.6089	9.71361	5.21633	11.4148	8.49311	10.7037	7.79916	9.59244	8.61739	8.99965	7.54914	11.4418	4.82376	10.4692	11.8515	9.49118	9.38545	11.9571	11.2608	12.7686	10.5602	10.7009
ENSG00000101680	11.4711	12.84	8.52579	11.7207	11.805	14.1409	7.82207	12.2792	8.62893	13.2949	9.84943	14.366	7.79019	13.5937	11.7984	13.9506	9.92808	12.232	10.3338	13.8235	8.0979	14.0663	9.55436	14.4353	9.96641	15.2811	8.99585	11.9519	10.0429	13.4665	9.60318	13.7265	10.1478	13.0549	14.0485	10.6061	9.75402	11.7342	10.8029	9.83556	9.82341	10.8183	10.9301	8.74373	10.8428	11.515
ENSG00000255284	7.2657	7.3125	9.06999	8.22345	7.79089	8.08969	7.4255	7.93955	8.539	8.19435	6.95399	6.96788	7.60377	7.94387	8.80108	8.13635	7.39323	8.2113	8.9376	7.74933	10.2212	8.6845	8.77862	7.54814	8.99776	8.11952	10.2756	8.03412	7.66242	6.90471	6.87449	8.30084	9.20125	7.96014	7.54914	8.45467	8.45987	7.9797	7.6912	7.88108	8.67773	8.33107	8.41006	9.85067	8.69061	7.22112
ENSG00000111785	13.3414	13.7657	13.6994	13.1299	14.0646	13.3407	13.9941	13.8535	12.4726	13.5569	14.5844	13.1403	13.0031	13.0809	12.7395	13.4361	12.9507	13.6995	13.712	13.0114	12.9893	13.4379	13.3633	13.1205	13.3051	13.2868	13.7108	13.6168	13.2944	13.303	13.4678	13.4263	13.5751	13.7123	15.1329	13.331	13.0084	13.1594	13.0822	12.8554	13.5485	13.2284	12.9741	14.1439	12.4801	13.1678
ENSG00000261279	2.63498	3.54467	5.02577	3.49852	2.63498	2.63498	3.88227	5.38129	3.90416	5.29541	5.24611	5.16157	4.41537	2.63498	6.14337	2.63498	4.24245	6.22162	3.36645	3.55307	5.18664	4.68799	2.63498	4.47614	2.63498	6.34096	2.63498	3.73977	2.63498	5.01194	2.63498	4.95353	5.83718	4.28956	2.63498	5.30715	5.74887	4.94278	2.63498	2.63498	4.34571	6.52524	5.09546	6.44753	2.63498	4.34426
ENSG00000173846	13.7167	12.178	14.2555	13.3191	14.223	10.8397	11.8561	12.9583	12.7875	13.0612	14.9449	12.1966	12.0638	14.1474	13.571	11.8963	12.1585	11.5161	13.8188	11.937	12.9622	11.254	12.8501	11.2997	13.9445	11.3767	14.8541	12.1478	13.8139	13.9059	12.5986	12.8383	14.3248	12.7013	13.2844	13.2774	14.5042	12.9375	13.9474	13.9738	13.058	12.1307	14.2432	10.9146	11.6632	14.0167
ENSG00000168303	14.2235	13.818	15.2441	14.9724	15.4927	14.7115	15.4902	14.7918	15.8096	14.1967	14.2907	14.5434	15.3286	14.3862	14.5879	14.5231	14.8426	14.1742	15.6133	14.2364	15.0877	14.9136	15.4421	14.9328	15.6869	14.448	15.9475	14.5864	15.7665	14.2858	15.6878	14.2335	13.8314	15.3337	16.4319	14.4674	15.0871	14.6324	15.408	15.0641	16.1369	13.8299	14.9751	13.6156	15.2853	13.9698
ENSG00000133027	13.5003	12.7015	14.4398	13.0395	15.8157	12.7107	12.2812	11.8608	14.4015	12.3611	12.3673	12.1561	14.0805	12.7086	13.6456	13.8556	12.8539	13.1478	13.4244	12.9597	12.7831	13.6526	13.2668	13.4929	14.5467	13.5515	15.062	12.5864	13.9894	13.1815	13.9369	12.7885	13.9596	13.8227	14.0973	12.3145	14.6617	12.9372	14.102	13.2821	13.113	13.1131	12.5064	12.7805	14.6911	13.1764
ENSG00000126562	15.5955	15.7544	17.1636	16.165	13.5425	15.189	14.6515	14.592	16.9682	15.0404	14.3296	14.5829	14.3419	16.6479	15.1071	13.3583	17.3849	13.7188	17.0759	17.047	17.5775	15.9555	15.5437	16.5575	15.4186	17.5629	11.3945	15.1858	15.6063	14.9764	15.3213	16.9241	17.6741	13.7013	17.1556	14.5739	19.5858	15.8031	15.7952	16.0523	15.3404	15.5818	13.7587	11.0663	15.3872	16.7421
ENSG00000113441	16.2525	17.2684	15.4114	16.1055	14.9557	16.4011	18.4252	16.9236	16.0284	17.0326	17.3451	16.458	16.4142	16.0559	16.6215	15.2063	15.2412	16.4269	16.1216	16.7051	15.0365	15.5457	15.3612	15.722	15.8704	15.7397	15.2022	16.0905	15.553	15.657	16.5096	16.1262	17.0552	14.8511	17.184	16.4399	17.2211	16.709	16.4463	16.5174	15.7688	16.497	15.9424	17.7617	15.7793	16.4514
ENSG00000082515	13.664	13.6186	14.7935	13.995	14.3554	14.5918	13.1195	14.1955	15.0182	14.0401	14.7832	14.1719	14.5728	13.9028	13.953	15.5314	13.6462	14.3968	14.7501	14.1415	14.2727	15.0892	14.4291	14.9553	14.8497	14.0106	16.1623	14.0392	14.743	14.8117	14.3942	13.6753	14.2805	16.1833	15.1223	13.9986	13.5333	13.7743	14.339	14.1443	13.9415	13.9215	14.114	13.969	13.475	14.4399
ENSG00000151012	11.6277	9.47014	13.2321	11.6556	10.8715	9.54769	16.1176	10.6863	14.4	10.0124	17.5676	12.0736	12.9349	10.2478	13.8669	10.454	12.5331	9.52619	14.7028	11.8245	13.6103	9.04548	12.1313	10.6568	14.2919	10.7509	15.2087	9.30644	14.489	12.5995	14.4055	10.5724	17.8472	10.7756	17.1169	9.61824	16.0353	9.49707	14.8587	11.5269	13.0661	12.3608	13.6141	5.98843	12.6773	12.6347
ENSG00000228502	7.94823	8.19517	10.492	9.68383	10.0882	9.34534	10.7397	9.60855	10.3046	8.84533	9.97434	8.27727	8.73797	7.14261	8.88113	10.2781	8.673	9.91051	8.67506	8.85305	7.91573	9.86013	9.05391	9.59679	9.71414	9.78491	10.8631	8.38724	8.7238	9.93563	9.49256	9.28407	7.72567	9.89026	8.80123	8.51301	10.0199	10.7467	11.336	8.8317	8.05544	8.62455	7.93048	9.38025	9.35945	8.87528
ENSG00000270015	10.6803	10.3628	10.278	10.4212	10.597	9.78014	11.1624	10.3677	8.97841	9.41004	11.6692	10.7991	9.50808	10.8775	10.1141	8.82629	11.1543	9.42915	10.6806	10.8721	10.5054	9.47987	10.6524	10.0027	11.9551	10.6882	9.24858	10.3098	10.9106	9.57559	11.3302	11.6741	11.2625	8.01199	9.96595	10.713	11.9361	10.9158	11.4406	10.5921	10.9852	10.5622	10.2168	10.4129	9.41588	10.1515
ENSG00000011677	4.06733	6.64536	8.13612	4.29488	3.6716	4.84174	3.53024	4.78045	3.38318	6.10187	3.96767	5.88598	3.93128	5.46948	3.24599	6.31808	11.4757	5.06198	3.87685	5.11797	2.63498	4.68799	6.23726	5.10585	9.67714	4.81051	2.63498	4.71427	2.63498	4.75396	3.91493	3.4392	2.63498	3.55309	2.63498	7.40769	10.1226	5.61789	3.65154	6.68532	3.52706	5.33281	3.40905	5.98843	3.48986	5.04114
ENSG00000135905	13.1851	13.2886	10.9894	14.0258	12.8558	13.289	13.0701	13.8428	10.4251	13.826	13.8589	13.7946	10.6562	14.2365	14.5752	13.725	12.9575	13.0235	11.5696	15.0275	13.9423	13.526	11.3233	13.8612	11.3472	14.0968	10.434	13.7672	11.4097	13.8256	11.9351	14.446	13.255	12.3426	11.3131	13.2681	10.0715	13.4637	13.2822	13.7687	12.2975	13.59	13.5245	11.9648	12.7842	14.1404
ENSG00000117682	15.8485	17.0839	14.2367	17.1434	15.446	17.459	14.1901	16.9517	14.1429	16.4625	15.8761	17.7341	14.5586	17.1581	14.681	16.3851	15.5241	16.5156	16.4179	17.0016	15.7148	16.7265	15.5249	17.096	15.3853	16.5019	16.2236	16.5301	15.569	17.4438	14.5994	17.1985	16.3234	17.0638	15.4654	16.3835	15.019	16.4854	14.7597	17.2118	15.1042	16.169	15.1403	15.8454	15.046	16.6727
ENSG00000227719	4.06733	4.47053	4.44526	5.12981	5.22233	4.29573	6.64566	5.47516	3.90416	4.09831	8.46603	5.54659	4.41537	3.95963	5.39373	2.63498	6.01141	3.72101	5.196	3.91316	5.4603	2.63498	4.74789	3.97802	6.48113	4.32702	3.93898	4.71427	5.85446	3.37772	5.9802	5.53145	5.53503	2.63498	5.0057	5.30715	5.34333	4.16483	5.18056	4.94572	5.57828	4.33039	5.01307	2.63498	5.05954	5.16257
ENSG00000174197	15.7504	15.7262	14.6668	15.1008	14.6529	14.7867	17.8745	15.1301	15.2952	14.7921	16.6301	15.2347	15.5549	15.2941	14.8394	14.0815	15.2937	15.0236	14.6746	15.4954	15.1197	14.2225	15.2633	13.9256	15.7139	14.8635	14.6969	14.8943	14.6027	14.3108	15.8262	15.0285	15.7879	13.6979	15.0291	15.0855	15.5745	15.3995	14.9063	15.379	15.7613	15.3852	15.3787	15.9417	14.786	15.2224
ENSG00000175643	12.6964	11.9536	13.3322	13.0562	13.8007	13.5021	15.0883	13.0077	14.1135	13.3103	14.1473	11.9791	14.239	12.4494	13.6461	13.6965	13.5699	13.1304	13.1369	14.1998	14.0329	12.5545	14.1112	13.3962	13.025	12.3022	13.3564	12.4169	14.0481	13.3938	14.911	12.2291	13.6718	12.4271	14.1654	13.5097	14.2359	13.317	14.244	13.7976	14.7801	13.4891	15.4146	11.026	14.9295	14.1349
ENSG00000100626	8.67482	13.097	6.74982	9.6985	6.82452	11.6572	6.25039	9.99349	8.62893	12.7631	7.08093	10.5156	10.4895	10.1597	10.9366	12.9147	6.74769	13.7647	6.17491	10.3183	5.95213	11.3147	6.32975	9.51076	7.2695	11.2151	4.77079	12.0746	7.85093	11.2418	5.39042	10.1949	7.1428	10.1201	3.55502	12.7244	4.98648	11.7066	8.6278	12.695	8.25106	13.8582	10.5731	14.6813	8.37963	12.4547
ENSG00000228797	6.02173	5.48367	6.6597	4.23073	5.57279	5.36909	6.31186	6.47277	5.56953	5.57168	5.38677	5.09654	6.65113	4.8514	6.28706	5.90879	6.53066	6.07018	6.64574	5.99664	6.17408	6.63343	6.0755	4.37003	6.77763	5.92362	7.85052	5.20445	6.5744	6.56203	6.3337	4.90459	6.23023	5.8064	6.91342	5.42235	6.60354	6.07046	7.62808	5.74016	6.58484	5.87677	6.21288	6.85095	6.76826	5.8378
ENSG00000269968	10.6013	2.63498	10.4874	6.17522	6.89742	6.33639	12.3799	2.63498	2.63498	7.58468	12.5784	2.63498	10.6206	9.08726	5.03265	2.63498	8.59278	8.81229	2.63498	2.63498	8.77876	2.63498	2.63498	2.63498	2.63498	9.22459	14.0225	7.54579	2.63498	7.24665	7.97414	2.63498	6.94045	9.55815	16.9242	13.7181	11.0285	10.7229	14.1801	12.6012	2.63498	12.7222	14.0253	2.63498	14.9011	6.5409
ENSG00000126088	15.1402	15.7771	15.4558	15.3812	16.0404	15.5399	14.2381	15.4006	14.6121	15.9729	14.9701	15.5753	14.5033	15.4208	15.1652	16.6124	14.8908	16.385	15.3668	15.1817	14.5757	16.6351	15.3155	15.9932	14.8562	15.8372	16.7308	15.7438	15.3022	15.8534	14.3754	15.4313	15.2027	16.8113	15.5585	15.4608	14.7065	14.982	14.6887	14.938	14.4881	15.9972	15.4756	16.7895	15.469	15.1817
ENSG00000136631	14.4681	15.1711	14.5932	14.7114	14.041	15.0741	14.1922	14.8526	14.7507	15.3991	14.8097	14.6044	14.0808	14.8478	14.6331	15.2829	14.19	15.3846	14.8418	14.8263	14.4075	15.1501	14.1346	14.8207	14.2163	14.9244	14.9007	15.0425	14.6394	15.1927	14.0463	14.7472	14.485	15.086	14.3358	14.7978	14.3209	14.8378	14.0629	14.645	14.0674	15.1344	14.1881	16.0626	15.0831	15.4158
ENSG00000279576	2.63498	2.63498	2.63498	2.63498	11.8344	6.54088	7.80091	12.096	13.4415	10.8235	9.50622	10.3849	2.63498	2.63498	10.2536	5.3712	11.3915	5.80755	2.63498	6.26608	2.63498	6.95906	7.4096	6.82388	2.63498	2.63498	6.72413	2.63498	10.477	8.23738	5.50766	2.63498	2.63498	5.77203	10.4752	2.63498	10.2723	2.63498	8.91637	2.63498	3.71934	2.63498	5.79928	2.63498	6.22468	2.63498
ENSG00000196338	8.03609	11.4669	9.11896	8.66775	8.56869	9.68411	8.79884	8.56986	7.10557	11.0644	8.23124	9.32614	7.34261	9.7455	9.69509	10.4229	8.51347	11.1452	8.8123	9.52281	9.14321	9.65784	6.83702	9.24802	7.75646	9.85118	9.55753	11.2002	6.9326	8.48796	7.92333	8.97606	7.7686	8.35364	5.55079	11.0031	7.65109	10.0543	7.25526	10.2907	9.07046	11.721	7.91413	12.8725	9.78004	10.6528
ENSG00000066777	17.8006	17.4109	17.064	17.2911	16.0985	17.5744	17.965	17.9764	17.0859	16.706	17.067	17.7191	18.6887	16.9929	16.1652	16.2435	17.164	16.6787	17.656	17.1799	17.0426	16.7852	17.9584	16.8669	17.968	17.2513	17.2008	16.772	17.0307	17.0669	17.9243	17.1006	18.4377	16.6842	16.3228	16.8159	17.1404	17.5338	17.1833	17.529	17.3157	16.6226	17.1258	16.2455	15.7953	17.3613
ENSG00000251429	6.09427	4.78756	5.36365	5.34028	7.52828	5.68537	6.10151	5.86811	4.31318	5.45995	5.73918	7.54226	4.11669	6.12711	4.77687	5.19653	4.99359	4.13843	5.84371	6.28235	5.83845	4.30387	5.65449	5.8945	8.13964	5.9738	5.67336	5.04098	4.49917	4.23148	3.38979	8.09667	4.81159	5.70066	7.18412	6.59177	6.52085	6.36876	4.61516	5.44168	5.05879	5.40899	5.77505	4.92337	3.91738	6.06786
ENSG00000164404	5.65555	5.8179	5.95181	6.11237	5.85254	6.26598	4.78054	5.79784	7.05073	5.25101	4.70679	6.02923	3.70469	6.51649	6.26587	6.60173	6.26127	6.25708	5.56987	5.63823	5.95213	6.3332	5.40198	4.8286	6.57229	5.8716	5.41757	6.08628	3.61437	5.49927	5.39042	5.91437	5.17781	5.17272	6.11591	6.15758	6.33957	6.0519	5.042	5.31084	5.26254	6.22733	5.82311	6.51928	4.88032	5.4017
ENSG00000186675	4.59146	6.83531	2.63498	4.84068	2.63498	5.2552	4.06166	4.43387	3.68188	4.09831	3.96767	5.3399	3.70469	5.19529	3.89993	4.88339	2.63498	7.02446	3.36645	4.7812	2.63498	4.68799	3.44009	5.28178	2.63498	5.61027	2.63498	4.71427	2.63498	5.22811	2.63498	5.65193	2.63498	4.48602	2.63498	6.32717	2.63498	5.61789	3.65154	4.43938	3.27072	5.33281	3.40905	8.33905	4.1131	5.04114
ENSG00000184979	14.0441	11.0286	11.7875	11.2168	13.6141	12.428	11.1613	11.5654	10.3259	11.4094	13.4317	12.4222	12.0626	11.1905	11.9642	14.5213	12.0362	11.8979	13.6395	11.5436	14.9976	12.1258	12.9107	12.112	12.724	11.3292	14.2699	11.2711	11.5812	13.3713	12.4765	11.2607	13.5474	11.9334	13.0747	13.9582	13.4421	11.7443	13.1763	13.9539	12.4705	13.5346	13.9669	11.1827	13.3851	13.0507
ENSG00000242571	4.26895	4.6389	5.42863	4.16282	5.89419	4.23156	6.02998	5.28056	6.60662	5.33842	4.59064	3.62721	4.902	3.85084	4.83815	4.88339	5.64666	4.56735	4.46575	3.80777	3.84599	5.26051	4.35502	2.63498	5.10885	4.5573	5.36995	4.04017	5.46824	5.19439	6.51014	4.09588	3.70099	5.41755	4.73628	3.96112	3.93489	4.31084	5.33601	3.5278	3.80192	4.4122	4.3664	4.76805	4.39724	4.90763
ENSG00000272335	11.8495	11.0001	10.7218	11.1929	10.5742	11.4636	13.5535	12.0613	11.5506	12.1905	11.6616	11.3557	12.0222	11.0807	11.6893	9.29631	11.8782	10.89	12.7252	11.0661	11.7684	10.6642	10.6399	10.4366	12.8337	11.3587	11.1249	11.6646	10.9534	10.2881	12.3935	11.0424	11.7146	8.93593	12.6681	11.4707	11.864	11.5171	11.7213	11.3509	12.2975	11.1094	11.1987	11.6358	11.9422	10.8564
ENSG00000171243	12.2577	13.0694	10.652	13.9886	3.6716	14.0699	12.0278	14.2851	7.72884	12.6969	5.73918	12.9105	12.9917	13.6254	11.3587	13.8966	10.8824	13.5297	11.0416	13.0295	12.7831	13.6106	11.7373	14.2121	8.68174	12.6027	2.63498	14.1656	11.194	13.2306	11.5981	13.8978	11.9007	13.6985	12.9597	11.6835	8.98412	13.3508	7.85548	12.6513	11.9762	12.5153	11.3043	12.8554	11.3458	13.4774
ENSG00000267041	9.6229	9.44394	9.56127	8.74689	12.1908	9.14347	10.1489	8.82687	8.539	9.77527	11.4877	9.25936	10.6099	8.89642	9.27142	7.50186	8.31484	8.49573	9.90227	9.58115	9.04524	9.0706	11.3144	10.1929	9.80894	8.81513	4.77079	7.98412	10.477	7.87816	9.74739	8.80449	9.64157	7.11194	13.4668	9.19199	11.342	8.65235	9.12593	8.52521	10.0597	8.82136	9.58131	9.07921	11.1269	8.16522
ENSG00000111530	17.4851	17.6285	17.7632	17.6013	17.7987	17.6738	18.8055	17.7401	16.5545	17.3744	18.222	17.6228	17.9062	16.8735	17.305	17.3357	17.1541	17.3605	17.4373	17.5182	17.9167	17.262	18.0876	17.0784	17.572	17.2455	17.5635	17.4146	17.7305	17.5897	18.198	17.2044	18.1891	17.2999	18.4972	17.1116	17.7509	17.6205	17.7794	17.6234	17.5262	17.2914	17.4589	17.5532	17.6887	17.6793
ENSG00000120457	11.192	9.75862	8.09753	8.47355	8.10794	9.30751	5.91542	7.85653	7.68156	10.3882	6.57664	8.86933	8.66042	7.56298	11.1116	10.4832	10.0229	11.2904	6.2701	8.64998	10.6755	9.6192	9.23832	8.31003	8.71199	11.8579	7.46316	10.8022	7.36954	11.5507	5.8761	8.55378	7.09106	8.11717	8.76269	8.19438	4.33798	9.55539	9.10293	6.04148	7.88998	12.9296	8.15577	12.2483	9.66236	7.36901
ENSG00000231234	5.623	4.27539	4.7416	5.39493	5.99326	5.2552	5.60516	4.92408	5.17507	4.47821	6.45662	4.71324	3.70469	4.05815	4.80787	4.76016	6.47375	4.56735	3.97001	4.87374	4.93792	4.30387	5.00294	4.37003	5.3389	4.86677	4.4254	5.60279	5.60916	5.60461	5.78692	6.57304	5.28967	5.27595	4.57726	3.65193	5.86156	5.02357	6.17287	2.63498	5.78771	4.87092	5.41465	4.76805	5.62774	3.87687
ENSG00000187486	9.16128	8.49487	11.323	9.6663	8.7138	8.32138	9.17474	8.03325	9.21249	8.7397	9.27407	8.01274	10.8847	8.26254	10.3493	8.04503	10.8997	8.0194	8.34661	10.1676	11.5731	8.71351	9.95291	8.79179	8.80226	9.77444	12.5511	9.03562	9.52478	7.7542	11.7232	9.61266	10.0973	8.06203	14.2282	8.51301	12.7133	9.66539	10.2874	8.71427	9.05225	9.11056	8.19238	8.1865	11.6044	9.29377
ENSG00000272989	6.55366	8.28058	5.57887	8.66775	5.83124	10.8111	5.87507	10.8518	5.24362	7.32745	6.18124	8.23398	6.84362	11.0019	5.05826	7.62476	8.88775	7.12342	7.61889	9.46556	6.15528	7.33642	5.09267	8.1576	6.72569	7.84028	8.17596	10.428	5.99707	8.0757	8.04716	9.78776	7.64605	9.24829	5.845	10.1299	4.56941	8.87283	6.90405	9.65836	5.92654	6.32728	5.56447	5.3037	6.46496	8.28975
ENSG00000271978	5.77869	4.98297	5.46	4.29488	3.89192	4.66926	7.11817	4.43387	6.2312	6.42946	5.63131	5.54659	5.29054	5.03433	5.83249	5.24233	5.84081	5.7586	5.43777	4.7812	3.9544	5.33044	4.50015	4.8286	7.55591	4.81051	5.41757	5.15212	5.51682	4.60289	6.42464	5.25369	5.05591	5.37195	3.9158	5.42235	4.33798	5.2404	5.55316	4.13738	5.37599	5.16647	6.4892	6.92312	4.78071	5.16257
ENSG00000214176	13.931	12.831	13.2954	12.8888	13.4058	12.4677	13.0423	13.3927	13.6329	11.4638	16.4992	13.6418	12.5821	14.6027	14.0911	11.613	14.2054	11.6865	14.2418	13.4716	13.9328	12.1312	13.8025	12.8128	13.8683	12.7781	13.7103	12.0772	14.1298	12.2471	14.0387	14.3024	15.4907	12.606	13.636	13.8791	14.6953	13.5385	12.8169	13.6298	13.7531	12.2865	13.3798	11.9717	10.9953	13.2597
ENSG00000100122	6.27135	6.33749	6.15496	6.77999	5.83124	6.26598	5.23821	6.89616	4.94575	5.70796	3.73535	6.30679	3.70469	5.46948	6.51939	8.98535	5.05899	8.0194	4.7259	6.42097	5.02604	7.75159	9.82927	7.25186	5.62485	5.73245	5.21633	7.23951	4.59779	6.96441	3.91493	6.75666	4.24017	7.48153	5.0057	5.78516	2.63498	7.9797	6.63825	5.48268	5.13882	8.8517	6.2307	6.3976	6.6383	5.72643
ENSG00000092529	10.9019	8.66787	11.9373	10.6339	10.5977	9.97809	9.55865	11.6857	8.73977	10.4288	10.9503	11.6885	9.28444	12.4287	10.8303	8.2388	11.4078	9.09137	12.7921	10.4574	10.3334	9.6694	9.62317	10.1495	12.7469	10.3408	9.43272	10.7293	10.7958	9.6394	10.6777	12.181	9.51153	10.3036	7.13121	11.5346	12.1678	11.3014	9.1809	10.8219	12.2398	10.3027	9.91133	9.04332	7.48791	9.2497
ENSG00000154975	3.48403	7.70593	3.72403	5.12981	3.6716	5.83002	3.36977	6.75625	4.61574	7.74938	2.63498	5.16157	5.14822	4.8514	2.63498	7.68248	3.59405	7.49248	3.87685	6.24962	2.63498	7.09288	3.75971	7.40762	3.9799	6.84837	2.63498	6.08628	3.61437	6.0377	3.69094	5.53145	4.60415	7.8505	2.63498	7.50682	4.56941	6.39836	3.36107	5.63556	3.71934	7.07641	6.41333	8.61381	3.48986	5.90744
ENSG00000056972	15.001	16.0069	15.1493	16.774	13.8978	17.3335	13.8532	17.2408	14.6316	16.0977	16.3228	16.8293	14.778	16.361	14.9858	15.2424	14.4801	16.073	14.8461	16.2117	14.1397	16.3291	15.262	16.8678	15.6891	16.6513	15.569	16.7255	14.2056	16.4485	15.1537	16.3947	15.664	16.7982	15.8335	16.2872	15.2877	16.4746	15.6124	16.1158	13.9939	15.4873	14.9598	14.7914	14.8305	15.4335
ENSG00000112818	17.2998	20.0279	18.6871	21.2939	11.9101	22.0197	17.8137	21.7684	20.2665	20.6201	13.761	22.2405	15.8708	20.7202	12.6159	17.6718	13.1259	19.9196	19.9622	20.5732	16.1672	19.5943	16.2551	20.6887	17.4258	20.1585	16.4341	19.3925	17.3483	18.4906	18.0693	20.77	17.1904	19.8658	16.1979	19.6736	16.5327	19.6889	17.4317	19.0225	18.164	16.7124	16.1804	16.396	16.0056	18.0642
ENSG00000143157	16.5718	16.2004	16.5226	16.4206	14.8901	15.8693	17.5491	15.9177	17.1605	15.8943	16.7469	15.8732	17.2706	16.186	16.5092	15.3166	16.6486	15.6973	16.6644	16.0126	16.8969	15.8264	17.1852	15.6802	16.966	16.1927	16.1861	16.0781	17.1461	15.6554	17.7117	16.2332	16.5972	15.679	16.8192	15.9537	17.1927	16.1444	17.1036	17.1665	16.6624	15.9911	15.8862	15.7616	16.3321	16.1689
ENSG00000275778	6.39105	5.85056	6.86947	7.30515	9.43088	5.86876	6.13597	6.82791	8.25006	6.62942	7.288	5.63945	8.48438	8.36031	6.74993	7.62476	5.70777	6.18525	7.11451	5.82881	5.42892	7.20624	5.21701	7.456	7.33152	6.51965	7.85899	7.37882	7.00136	5.55293	7.35337	7.29253	4.88611	7.57318	8.53258	5.86791	8.09449	5.17191	8.571	4.34702	5.6869	2.63498	7.30183	2.63498	5.43784	7.07886
ENSG00000142875	16.8907	18.1862	16.5734	18.7667	14.229	19.0551	15.9194	19.3461	13.2714	18.777	12.9802	19.2209	14.7475	18.3783	13.9701	18.5941	17.6224	18.6602	15.2772	18.3631	17.2193	18.903	15.9302	19.4472	15.5767	19.1995	14.0681	18.3873	14.5978	18.2889	14.0508	18.286	17.5671	19.1591	15.0942	17.8441	17.5835	18.3521	14.5567	18.0465	15.7982	17.3149	15.9646	18.0264	15.5237	18.4911
ENSG00000075790	15.9838	16.5793	15.6037	15.77	14.6219	15.4784	16.3827	16.2673	16.154	16.6004	15.4332	16.0961	15.9663	16.0654	15.2395	17.6131	15.7096	16.8053	15.8253	15.8874	15.4131	16.966	15.3683	16.9127	16.1679	16.6913	14.7069	15.797	15.642	16.3478	15.452	16.0986	14.8104	16.5633	15.7067	15.629	15.5922	15.9608	15.6402	16.1448	15.6488	16.2992	15.7737	16.9718	16.1494	16.4911
ENSG00000016602	16.7923	21.7757	4.44526	23.2005	3.6716	17.9834	6.34163	22.363	5.85515	22.9091	14.7237	25.196	7.83609	21.0364	5.66333	21.6009	12.3455	22.6329	15.6926	20.457	11.9537	19.418	15.7118	22.7666	16.0188	18.2011	6.72413	21.7933	16.8674	23.3667	11.2303	22.1535	18.3719	20.5554	7.91232	19.8453	7.36007	22.3829	10.7426	16.5602	5.83552	19.2046	17.8736	18.8827	8.10144	20.8909
ENSG00000140522	3.48403	6.2181	3.72403	3.34349	3.6716	2.63498	4.91049	4.78045	3.68188	7.74938	4.1575	4.2946	3.70469	5.03433	3.24599	8.5086	4.77552	8.2113	4.13488	4.17759	3.9544	5.33044	2.63498	4.57383	2.63498	4.04079	3.57219	6.54836	2.63498	4.75396	5.12093	3.7585	2.63498	4.48602	2.63498	5.30715	6.52085	4.37756	2.63498	3.87897	3.52706	7.58235	2.63498	7.71476	3.13331	5.04114
ENSG00000168172	15.7608	16.0404	15.2597	13.6183	13.8343	13.6224	16.7072	14.6789	15.0277	15.0628	15.928	14.4405	15.5701	14.1804	14.7453	14.4019	15.109	14.6793	14.5455	14.133	14.2052	14.2182	15.6022	13.8159	15.7593	14.2291	14.3627	14.5185	14.1997	13.7521	15.3486	14.2839	15.035	13.9978	14.0834	14.6479	14.0441	14.7571	15.1222	14.5055	15.2161	14.9787	15.3592	16.6761	14.6269	14.4478
ENSG00000109606	17.9069	17.9369	18.1768	17.8841	17.9502	17.9326	18.8877	18.3157	18.9367	17.6325	19.2049	18.4234	18.5465	17.809	17.3986	17.7496	18.6095	17.614	18.8524	18.0507	18.647	17.554	18.7408	17.6794	18.0077	17.6452	18.8613	17.8121	18.5082	18.3334	18.5178	18.1157	18.3904	17.9795	18.2211	17.4725	18.5748	17.7394	17.9269	18.0432	18.3566	17.4974	18.2199	17.2464	17.4412	18.4487
ENSG00000120451	17.7183	18.0998	16.561	17.0792	15.2619	17.258	17.0608	17.3998	17.2107	17.051	16.4628	17.2598	17.2677	17.3344	16.6405	16.6991	16.6772	16.8817	16.7763	17.3366	17.1195	16.6082	15.402	16.7109	15.8323	16.698	16.9602	17.3013	16.1646	17.1764	16.0794	17.0258	16.2633	17.1865	14.9508	16.7727	16.5635	17.0376	17.1791	17.2593	16.8957	17.3021	16.5519	17.9688	16.9032	17.2407
ENSG00000215915	11.0591	7.15317	8.84976	8.79734	6.73639	6.16114	10.7258	8.1494	7.19256	8.03118	10.8247	7.29766	5.14822	5.23271	10.9784	8.41931	10.4312	7.99873	9.57976	8.0095	12.2196	7.4327	14.6848	7.876	10.4559	7.35029	6.68646	7.63185	9.21393	8.13308	5.56276	7.35505	12.0715	8.26487	5.59113	8.07464	12.2863	7.72463	8.64817	8.99687	13.1173	8.03451	11.0847	9.13332	9.34291	7.07136
ENSG00000234409	5.91883	4.47053	6.24658	3.83925	4.36398	4.99416	4.78054	5.17184	7.89868	4.89127	4.3199	4.88011	4.80864	5.37294	6.26587	3.49983	7.52749	3.72101	4.90174	5.44709	6.2469	5.33044	4.90674	5.10585	5.22872	5.61027	3.57219	4.46952	4.27445	3.67438	5.76371	4.90459	3.79775	4.48602	3.55502	5.88786	7.53829	6.29197	5.042	4.94572	5.57828	5.33281	6.4892	4.59158	3.33631	3.31322
ENSG00000276291	10.3082	9.93264	10.6636	9.89659	12.5266	9.95046	11.1251	9.22111	12.0505	10.29	11.6892	9.7565	9.54134	10.4573	12.094	11.6007	11.1744	10.9288	10.6465	10.5604	10.0038	11.425	10.5999	10.2994	10.5332	10.8068	10.6663	10.1667	10.1712	9.40161	8.72106	9.84326	11.5202	11.3742	10.4444	9.59292	9.43902	9.79552	10.5511	9.49364	10.7686	10.3683	10.229	11.0673	11.1021	10.1037
ENSG00000117133	15.2028	14.9076	15.5758	14.6273	15.997	14.9506	14.8728	15.2576	14.7697	14.879	15.4314	14.7774	15.7558	14.762	13.6039	15.7971	15.6177	15.0879	15.445	14.8279	14.8841	15.4869	14.8085	15.7327	15.1551	15.2428	16.1775	14.8397	15.3456	15.2963	14.3393	14.4299	15.1149	15.9702	15.5711	14.5348	15.4275	14.5502	14.6039	15.0223	15.0383	14.5327	14.709	14.8268	14.4959	15.1207
ENSG00000085999	11.8171	10.1955	13.3142	11.7282	13.9784	11.8351	13.0357	10.0204	11.1653	10.8563	14.5738	10.6047	13.2035	11.1631	13.6474	11.3262	13.3815	10.8063	13.3318	12.1285	14.1898	10.7966	14.3656	11.6356	13.8868	10.5751	13.5702	11.3759	14.1211	12.687	13.8377	11.0772	14.6638	11.5917	14.1996	12.1794	12.9482	12.5626	12.7829	11.4101	13.3774	12.1375	13.0517	8.37158	12.6648	12.8095
ENSG00000110172	15.3738	14.1724	15.1513	13.78	16.8808	13.5552	16.824	13.9826	14.301	13.6669	16.1558	13.6565	16.1299	13.7281	14.9991	14.0494	14.1343	13.3417	14.242	14.5503	14.5791	13.3415	14.9571	13.8359	14.8841	13.8749	16.1461	14.0781	15.3353	13.8953	15.3375	14.3609	15.3006	14.6456	16.1386	13.7862	14.5302	14.121	14.6451	13.9431	15.6877	13.8572	14.7613	13.1799	14.3776	14.8128
ENSG00000165646	9.20253	10.0362	8.28521	10.5282	7.13118	10.0116	7.50621	10.1445	4.167	9.53708	6.68737	9.04238	7.25234	10.3298	9.98642	8.6883	6.48531	9.77126	7.91568	9.52111	7.83001	10.4075	8.93897	9.49928	7.65621	11.1389	6.93145	10.1311	8.48114	11.3094	5.8761	9.85565	8.12115	8.56667	5.87779	8.05731	4.98648	10.1803	8.03866	8.68873	6.3973	8.91692	9.58647	7.9135	6.45881	10.0226
ENSG00000167384	11.9085	12.0614	10.8542	12.4345	12.6886	12.4052	14.1104	12.1484	12.0279	12.355	11.8228	12.7582	12.4325	12.3252	11.8651	11.8354	11.5344	12.3866	11.6512	12.647	11.9472	12.1871	12.0122	12.3503	11.8065	12.3079	11.4111	12.2389	11.7263	11.8507	11.6544	12.2977	12.1636	12.2888	13.6593	12.1016	11.7434	11.8864	11.6756	12.0356	12.1082	11.9915	11.7359	12.2178	11.7947	11.3408
ENSG00000113732	17.6802	17.5815	18.3556	17.8799	18.1542	18.34	17.2153	18.2094	18.5704	18.1334	17.5601	18.4791	17.7219	17.6935	17.6163	18.9536	17.495	18.1665	18.0814	17.8547	17.9073	18.615	18.4792	18.5733	17.8207	18.1311	19.3095	18.0445	17.5041	18.3103	17.8629	17.6604	16.8015	19.2502	19.014	17.4229	17.7248	17.5353	17.8345	17.7073	17.3384	17.7792	17.9173	17.9512	17.8581	17.5237
ENSG00000278603	5.44777	6.64536	5.60707	7.06231	6.74771	6.4035	5.58013	6.55965	6.35757	5.60701	5.79016	5.49774	6.73855	7.67964	4.02435	3.84103	8.05765	5.60058	5.40977	6.9336	7.12185	6.3985	6.32975	6.37161	7.49529	6.61704	6.89891	4.46952	3.99579	6.09257	6.94766	7.08679	7.21362	4.87378	7.15791	6.9051	8.21467	5.69216	6.99795	6.04148	6.51858	6.00351	7.40692	5.64496	6.11907	7.03328
ENSG00000106809	11.8343	17.1132	10.6285	12.2702	8.53978	14.4128	11.8296	13.9379	9.46356	17.6126	8.32809	14.9519	10.2939	14.0935	12.5863	16.5681	5.05899	17.6254	8.34661	15.0549	9.85701	15.5121	9.63583	14.741	11.2492	16.5996	3.57219	16.3945	5.13419	15.1166	4.63125	13.6491	7.80571	14.861	3.55502	16.2886	7.47839	15.2701	7.93821	16.7604	12.0456	18.0944	8.89398	18.3986	14.6849	16.6537
ENSG00000138152	6.37179	4.71537	6.8228	4.29488	6.20607	3.62792	9.03001	3.94548	7.16701	4.89127	8.03652	4.01303	8.34061	3.41729	6.13169	4.09267	5.05899	3.72101	8.34661	4.39174	8.28558	3.41414	8.48681	4.57383	7.08626	3.46752	7.08392	3.54413	6.9326	5.72601	8.33841	4.27365	5.41778	2.63498	11.8149	4.56426	6.52085	3.38205	6.32617	4.43938	8.63165	3.79955	6.8754	4.59158	4.47866	3.78952
ENSG00000102921	16.7384	16.5213	15.4238	16.5166	15.9161	16.7225	16.006	16.4477	16.0916	16.4317	16.9515	17.0153	16.3256	16.659	15.9162	15.7971	15.6943	16.0114	16.0949	16.4224	16.1921	15.8264	15.5686	16.5393	16.0132	16.5368	15.1189	16.2742	15.9532	16.21	16.4975	16.5684	16.3497	15.6041	15.2415	16.0084	16.3368	16.2034	15.8938	16.0778	16.3231	16.1476	16.3669	16.2304	16.2796	15.8058
ENSG00000143178	9.85103	9.27884	9.261	8.35392	10.9103	8.58847	8.53627	9.20778	9.23517	8.66746	10.3165	9.50669	9.20802	9.34152	9.90961	8.95558	9.48045	9.0111	10.1636	9.72558	8.9126	9.41661	9.65727	9.7231	10.6507	9.87098	7.90877	9.00373	9.15493	8.57652	9.58532	9.96691	9.20125	6.75929	9.85838	9.85086	9.42777	9.16381	9.95623	8.67579	9.31916	9.96932	9.26645	9.98915	8.30474	9.27598
ENSG00000152409	13.9184	16.2898	12.9344	13.0498	13.2637	13.6787	15.8821	14.3581	14.8363	15.7275	14.9299	13.4103	14.8466	14.0169	14.0667	14.1923	13.2847	15.9165	14.0362	13.5697	13.4159	13.945	13.965	12.814	14.0013	13.772	12.7902	14.8653	13.3846	13.717	14.7499	13.944	14.4088	12.2473	15.2628	14.3547	14.0543	14.3145	13.8962	13.6801	14.1317	15.5402	14.1227	18.0433	14.877	14.806
ENSG00000232573	9.59839	10.4641	12.7024	13.1303	14.145	13.3833	14.5679	13.9928	11.1486	12.6338	12.6736	11.3276	10.9264	10.5475	11.9798	12.6048	12.2239	12.2074	11.6611	11.6958	10.4998	11.0322	11.4859	11.8326	11.2423	11.1949	12.406	11.0872	11.6165	13.5147	13.6735	12.8001	10.3106	11.832	12.0357	12.0647	12.3036	13.6285	19.3168	18.7359	11.2615	11.7232	12.3254	12.3672	14.9116	12.8036
ENSG00000167178	8.80554	11.0617	8.01192	7.98304	8.87423	8.64196	9.08573	7.0538	9.34158	9.76377	5.83936	9.47606	9.58564	9.05715	9.50157	7.8927	9.77001	10.2943	10.6048	9.61185	8.0979	8.32394	8.02476	8.54603	6.20504	7.68481	4.52103	9.99175	6.52845	9.2563	9.51845	7.42332	6.41058	6.11067	5.7056	12.2658	4.33798	9.7174	10.3375	10.0563	10.5501	10.8768	11.1897	11.2827	11.3464	9.38561
ENSG00000260092	13.2345	15.3048	13.0557	16.8918	17.0373	16.3577	5.06605	13.664	5.74311	14.8251	9.80425	15.4352	4.70809	17.6287	4.83815	15.3194	6.55281	13.5731	14.6474	18.058	14.4789	17.442	13.9567	18.4534	11.512	17.347	12.5696	14.3276	11.9752	15.3564	10.8185	17.0739	11.8069	12.5153	12.765	15.499	17.96	16.9689	14.6898	13.7749	9.62042	15.5975	10.1275	10.8901	14.9833	16.4395
ENSG00000105865	11.8281	10.3346	12.2127	10.978	13.5096	10.9598	13.7173	11.4456	12.8471	11.1308	12.3491	11.1758	12.9844	10.7493	12.361	11.1285	12.3524	10.9356	12.4219	10.8226	12.6415	11.5751	11.7051	11.225	12.6108	11.3375	11.7825	11.2033	12.6492	10.9064	12.8537	10.9829	12.1923	11.6692	12.6825	10.7982	11.876	10.5509	12.4409	10.812	12.5594	10.5156	12.6054	10.8979	12.8692	10.7404
ENSG00000151632	11.5451	13.2109	14.216	12.2768	9.64658	13.8756	10.476	14.4174	10.9585	13.4745	9.67635	14.6579	9.90225	12.6298	12.9057	13.2005	8.34675	13.6359	10.0192	12.4025	7.89337	14.1451	9.1478	14.1384	12.7507	14.6267	7.14064	13.8878	9.43153	12.8463	9.48907	12.6672	10.287	13.3741	8.09586	14.6342	8.8455	13.2714	10.0257	12.9823	9.42715	13.2504	10.6881	13.9317	10.3408	13.785
ENSG00000078295	9.98473	13.4715	9.09468	8.94113	8.10794	9.51336	8.04544	9.10369	8.82378	13.3257	8.32809	9.32614	9.01716	9.63096	8.84077	12.3551	8.88775	13.3864	9.53128	9.04768	8.17407	11.1635	8.86717	8.66902	7.0124	10.5831	5.5932	12.7052	5.51682	10.7781	8.23388	9.48687	7.1428	9.59745	4.48957	11.3214	4.98648	9.04787	9.01154	8.64071	9.28554	12.699	9.63879	15.3945	11.9924	12.2028
ENSG00000180089	9.09564	8.75571	9.41403	9.28837	11.2596	9.11787	8.03641	8.66072	8.76832	9.04226	9.01851	9.72298	7.2353	9.37241	9.89854	7.8857	9.11409	8.28143	8.87881	9.5057	9.68225	8.97004	9.45379	9.60753	9.80582	8.77717	7.73568	9.75899	10.122	8.97431	9.81024	9.97545	9.83784	7.8505	11.5396	9.93029	9.91259	8.79751	10.3624	10.2033	9.4764	9.78599	9.49055	10.2528	8.04528	9.64949
ENSG00000272601	6.46562	2.63498	6.50551	3.62738	8.13826	5.1945	6.771	5.47516	4.66835	3.50335	5.63131	4.01303	5.29054	2.63498	5.2251	4.38745	5.42115	4.4406	7.44049	2.63498	5.60737	4.14275	5.00294	2.63498	8.58333	3.7971	5.74917	6.21659	6.27351	3.53982	5.66684	4.56486	5.74352	4.73238	6.11591	4.12507	5.94053	3.68032	5.964	3.72022	5.80383	4.87092	3.7173	4.26906	5.05954	4.54574
ENSG00000084623	18.8827	18.268	19.5334	18.3251	19.4602	18.4525	19.0581	17.9333	18.1712	18.2533	19.1551	18.1262	18.9107	18.246	17.3999	19.4228	18.8787	18.5967	19.7962	18.295	19.29	18.8058	19.3382	18.7222	19.2193	18.517	20.355	18.3376	19.3761	19.4475	18.8714	17.8372	18.8874	19.5014	19.2364	18.3758	19.1418	18.1634	19.0904	18.7166	18.6672	18.6512	18.7871	18.4354	18.5086	19.1103
ENSG00000115705	8.90219	9.25191	5.83814	8.53133	7.36188	8.44376	5.39108	7.55325	6.56801	9.68871	11.2252	8.38673	6.10967	7.6664	9.27142	12.7709	5.29294	10.1911	4.34424	9.29877	6.05734	7.03266	6.23726	7.68634	4.47858	9.52243	3.93898	9.71152	4.59779	12.4371	4.63125	8.55378	8.56427	7.90636	11.8485	8.86871	8.04819	9.8202	6.56638	9.1668	5.83552	11.2603	6.57522	10.654	6.87824	8.93008
ENSG00000251455	3.95082	5.44106	5.06775	5.31213	5.74267	3.8399	7.22543	5.17184	3.38318	5.29541	7.17876	5.39454	3.93128	5.46948	4.53609	3.68669	5.15151	5.80755	5.66722	5.73675	6.13623	3.95451	5.46954	4.12433	4.60735	5.02247	4.08165	3.73977	4.59779	4.07623	6.07716	6.47962	5.05591	2.63498	4.05629	5.33686	4.15441	6.19401	5.11305	5.80579	4.9138	3.92885	5.7253	5.06239	4.18254	5.04114
ENSG00000164104	17.2279	16.6757	17.478	17.457	18.169	17.2489	19.0368	17.0177	18.0428	18.092	19.0261	16.7121	18.1898	17.3663	18.3337	17.6487	18.2244	17.9161	17.2193	18.7091	18.3717	17.8794	19.0948	17.8655	17.0571	17.1758	17.853	17.2167	18.0458	17.7677	18.7889	16.5298	18.1998	17.3876	19.1418	17.7326	18.1774	17.4567	17.8861	16.9285	18.1666	17.9754	18.1743	17.4838	18.3728	18.2446
ENSG00000222011	10.8238	11.1607	12.4648	11.352	11.3604	11.3152	13.0794	11.5926	10.9424	10.9923	11.5826	10.8321	11.8718	10.9304	11.3704	10.6577	11.8394	10.9356	10.3831	10.9558	11.7264	11.311	11.104	11.1654	11.0597	10.5901	10.7787	10.8348	11.7938	11.0113	12.3519	11.217	11.1686	11.6652	11.8222	11.175	11.3093	11.2823	11.7666	10.8738	10.7584	11.1045	11.2533	11.3961	12.0376	11.1871
ENSG00000177889	17.2202	17.1925	18.4287	17.0088	18.1638	17.2789	17.7701	17.4924	16.7609	17.4262	17.8113	17.456	17.637	16.7595	16.9228	18.5377	16.9759	17.3397	17.6945	17.2363	18.0392	17.6812	18.5537	17.6278	18.0566	17.0399	18.9361	17.2705	18.5166	18.0454	17.7902	16.8222	17.1617	19.0527	18.3313	16.9024	17.1867	16.8565	17.6797	17.6266	17.5669	16.9892	17.7874	17.1833	16.7913	17.6965
ENSG00000204392	14.7421	14.2712	15.9977	14.6758	16.0255	14.7724	14.8201	14.1494	15.282	14.8015	15.9551	14.1188	15.5274	14.4332	14.6479	16.1007	14.6485	15.0048	15.5801	14.6652	14.1749	15.712	16.1728	15.7634	16.3871	15.035	16.9772	14.5662	16.8532	15.194	15.8052	14.2752	15.2507	16.5984	15.8644	14.8095	15.2535	14.3355	15.0715	14.6047	14.8756	14.8351	15.0474	14.9255	16.1067	15.0944
ENSG00000154678	9.02073	12.1059	8.93974	11.2324	8.10794	11.6251	9.87932	11.9832	7.05073	10.8752	8.3865	10.5513	7.96042	10.768	8.65489	11.0633	8.91141	11.1155	9.03281	10.7254	7.60073	10.4673	8.48681	9.79765	9.07738	11.4667	8.12072	11.6737	9.81175	10.3273	8.49968	11.3559	9.42331	10.7616	5.17715	10.9012	10.6037	11.9352	9.37671	11.9906	9.38545	11.6174	10.3824	11.5847	9.76087	10.7753
ENSG00000165029	15.9274	16.3375	14.3215	15.4181	14.7101	15.8635	15.3658	15.8547	12.6296	16.4496	16.2538	16.3438	13.9384	15.2252	16.0309	14.1157	15.6872	15.9601	13.8538	15.5888	14.8497	14.7599	14.9421	14.6816	14.6384	15.6841	12.6769	16.3614	14.4682	16.0336	13.5227	15.6477	14.6869	14.7968	14.893	14.8227	12.8637	15.627	14.3408	16.2232	15.0544	17.1737	15.2655	16.768	14.544	13.4063
ENSG00000239523	5.37097	4.98297	5.46	5.39493	6.97644	4.88152	5.13756	5.47516	6.14612	5.86156	5.88689	5.72652	4.9892	5.96211	5.74275	5.04906	4.46372	4.78812	6.28537	5.87267	6.90385	5.18681	6.67773	5.6639	6.20504	6.3218	5.88954	5.52365	5.51682	5.94125	5.76371	6.43052	5.83718	6.36107	5.55079	5.44971	6.01532	5.3679	4.3327	4.68114	6.37605	3.79955	5.93652	5.98843	6.12688	6.17024
ENSG00000196290	14.2756	13.7358	14.8868	14.0981	14.1194	14.2094	14.5899	14.3496	15.2417	14.1918	14.7473	13.7909	15.4792	14.2534	14.052	14.8941	15.1171	14.4375	14.2979	14.4345	14.4364	14.773	13.7915	14.7701	14.7603	14.2104	15.3618	14.085	14.9465	14.4491	14.8607	14.2356	15.0399	15.4591	14.4623	13.6538	14.3633	13.8524	13.923	13.4347	14.5976	14.0502	14.4946	14.0914	14.4647	14.0455
ENSG00000153898	13.2436	12.6286	11.314	15.1298	12.4054	15.7225	11.4781	11.9305	14.9542	15.3462	12.4321	17.2661	12.7457	16.6782	12.488	13.7622	12.8609	13.7857	11.8851	13.7653	9.56165	11.8166	9.23832	14.0138	14.2939	14.6876	12.5878	13.9506	15.2469	14.0185	9.10064	15.4375	9.93727	9.62147	11.9396	15.2044	6.94506	11.1911	12.3325	14.8327	8.41294	8.78688	11.1443	10.8856	10.7668	14.3792
ENSG00000146085	15.6401	16.4434	15.7597	16.3985	14.6881	16.8407	16.0363	16.8043	15.1369	16.3305	15.4778	16.8997	15.4345	16.5791	14.8462	16.1316	14.8997	16.212	15.5781	16.5452	15.455	16.1002	15.4936	16.5705	14.7193	16.1634	15.7349	16.4186	16.0512	16.4211	14.8637	16.0974	15.9803	16.7729	15.3209	16.198	14.8634	16.1823	15.4767	16.5543	15.1301	15.5391	15.3554	16.0505	16.4722	17.0598
ENSG00000009844	16.1599	16.0002	16.1339	16.4004	16.1943	16.6519	16.358	16.875	16.8998	16.3439	16.2313	16.9677	16.407	16.0808	15.3242	16.5326	15.9618	16.0673	16.2217	16.3294	14.7776	16.4545	15.9321	16.7543	15.7905	16.1235	16.8033	16.2007	15.705	16.5999	15.99	16.3171	16.289	17.1756	16.5079	15.9276	15.3395	16.0722	15.3894	16.4656	16.0782	15.5228	16.024	15.3709	15.1011	16.1908
ENSG00000131368	15.3135	15.9978	15.894	16.3914	15.3942	16.4665	15.2792	16.3671	15.9041	16.1412	16.041	16.0086	15.6132	16.4564	15.9421	16.0218	16.1587	15.949	15.7262	16.3859	16.3873	16.2541	16.2308	16.1631	15.8626	16.1944	17.092	16.3463	16.3075	16.0026	15.6374	16.1903	16.2931	16.5925	16.5565	16.6583	16.2947	16.2288	15.6978	16.2511	16.336	16.0285	15.9975	16.1633	16.2384	16.3525
ENSG00000159263	13.5174	8.32721	11.4475	6.77999	11.5062	7.49	13.9169	7.85653	13.9298	7.80284	13.5932	6.67516	13.2119	6.60273	11.9341	6.20944	14.3209	7.31975	13.991	6.73588	13.5495	6.43007	13.1914	6.49297	14.6669	5.73245	10.1809	7.6411	13.7034	6.76614	13.7389	6.58803	12.4055	5.17272	13.9586	7.40769	12.3347	6.56409	13.7636	6.9525	14.057	6.77164	7.31851	8.89906	12.0512	7.58427
ENSG00000275832	14.234	16.5277	13.7952	13.0149	12.7761	13.2649	13.3026	12.3567	15.5133	14.9967	13.4265	12.869	13.7695	13.2501	15.5281	14.5784	14.869	15.1077	13.6256	13.3318	13.434	13.1234	13.4428	12.5391	13.8155	13.1274	11.503	14.5901	12.5163	14.4267	15.0293	12.9956	14.8427	13.1107	10.9292	14.4649	12.5745	14.5951	14.4191	15.2777	14.72	15.98	15.7195	17.2602	14.8124	14.616
ENSG00000005421	3.48403	4.71537	2.63498	3.34349	7.91121	5.61849	6.28146	3.94548	2.63498	3.84581	5.97742	4.01303	3.39984	5.72442	3.67832	4.62398	3.31927	3.72101	2.63498	4.96021	3.72417	5.46048	5.09267	5.28178	4.72421	5.16196	2.63498	6.4461	3.61437	3.67438	4.39405	5.53145	3.79775	4.73238	4.48957	4.33331	6.23948	5.2404	7.25526	6.04148	2.63498	3.79955	3.40905	4.26906	16.3551	3.58571
ENSG00000121766	14.4767	14.6495	15.5636	14.3992	15.677	14.8538	14.7715	14.2719	13.9573	14.7883	14.992	14.416	14.5816	14.2322	14.1117	16.1424	14.5342	15.255	15.1552	14.5866	15.3487	15.4892	15.2141	15.3032	15.0983	14.8531	16.2882	14.5436	15.0816	14.9296	13.6604	14.238	14.609	16.3044	14.7681	14.3348	14.3322	14.3393	14.0123	14.2129	14.8104	15.0634	14.7174	15.7447	14.4928	14.7224
ENSG00000048342	11.5595	14.7896	13.0868	11.5307	12.4615	12.2765	12.8862	11.9305	11.9753	14.1866	11.0349	12.099	11.7351	12.0405	12.8563	14.0063	12.8437	14.8636	11.2545	11.3587	11.3987	13.3749	12.3509	11.9256	11.5622	12.8478	8.9609	13.5988	10.3675	12.2043	11.8919	11.6125	10.1223	12.2267	7.03367	13.5232	9.38185	12.6166	11.0288	12.6238	12.1818	14.9868	12.5823	16.6742	13.3922	13.7271
ENSG00000178623	16.9021	15.8578	17.1999	17.3082	16.1049	16.9799	16.8899	16.4627	17.7205	15.956	16.532	17.1598	17.7366	16.8317	15.9475	15.3674	16.5811	15.2686	17.5239	16.4863	17.0837	16.2493	16.8703	16.7388	18.0778	16.5269	17.8456	16.1079	17.9808	16.1926	17.9421	16.9953	17.1566	17.0061	16.2251	16.1692	17.2277	16.3645	17.3578	16.719	17.0075	15.1687	16.2271	12.5102	15.1922	15.8459
ENSG00000116690	8.65117	10.1362	6.68603	7.04568	9.04167	12.292	5.89538	7.80432	5.3712	7.42816	6.3926	6.77952	7.35054	4.23212	15.0575	7.5907	5.56079	11.4587	6.2701	6.18182	5.33026	5.33044	4.74789	6.23895	5.53592	5.16196	3.57219	7.25165	5.13419	7.22242	5.76371	4.68832	5.94194	5.37195	7.20985	7.09568	4.05019	7.53872	8.21293	5.63556	4.9138	7.0878	7.16098	13.3801	7.00165	7.32559
ENSG00000204899	13.9377	12.7719	15.2363	12.9528	14.2932	12.8127	15.558	13.3771	16.7945	13.844	14.7707	13.2725	15.2108	12.6996	15.2108	14.7515	15.6196	13.756	15.8302	13.4694	14.776	13.8094	15.8203	14.0456	16.9358	13.3447	16.4483	13.0676	16.0756	13.8328	14.601	12.8426	15.0481	14.9972	16.4541	13.2312	14.7028	13.2889	15.2377	12.9192	15.2041	13.2524	15.182	12.8213	14.2778	13.5681
ENSG00000081853	7.86155	10.0571	7.6678	7.46367	6.30161	7.79371	11.9215	7.19584	9.32438	9.66212	7.64346	7.83094	6.45846	8.24484	9.63479	9.60833	6.60672	10.6855	7.22108	9.36479	7.25073	7.09288	7.51526	4.8286	9.83666	7.89289	3.93898	9.14363	5.85446	7.89867	7.90249	7.34628	6.03946	6.95403	11.8923	9.32275	6.65095	9.1935	8.94488	9.09085	5.81976	10.5271	7.94128	12.5182	9.30158	9.16085
ENSG00000140854	15.2282	13.8147	14.9432	14.975	14.4799	14.4649	14.4174	13.5587	15.014	14.0017	14.0101	13.8672	15.7228	14.8494	14.826	14.0117	14.7609	14.2465	15.1983	14.5797	15.0336	14.7647	15.5674	15.0951	15.1198	14.2844	15.8138	14.3358	15.7181	14.5331	16.0254	14.4158	15.2303	14.0713	14.0572	14.5985	14.8548	14.5398	15.1021	14.5346	15.1466	14.277	15.1899	14.0976	15.5607	14.3048
ENSG00000212719	12.898	13.0517	10.7655	11.1456	12.1706	11.3729	14.1532	10.1515	11.8005	11.941	11.6455	10.6507	14.8716	11.3139	12.27	11.3894	12.5734	11.8662	11.5819	11.5561	11.0542	10.5483	10.3319	10.3043	10.9603	11.2714	11.7719	12.0954	11.5095	11.4043	14.1684	11.124	11.9753	10.5687	12.3657	11.3874	11.2408	11.4672	11.0987	11.3311	13.0687	12.8734	13.1183	13.348	12.5672	12.3076
ENSG00000281490	12.9362	12.5501	12.9321	12.4574	11.7416	11.4324	11.8956	11.9665	11.0613	11.1936	13.0259	12.5669	11.6769	13.526	13.0884	10.2181	13.2549	10.4374	12.13	12.3727	12.0987	11.0899	11.5146	11.4422	13.328	12.0221	10.191	12.1008	12.7687	10.6831	13.407	13.9045	12.0717	9.64276	9.97909	13.285	12.4434	13.1424	11.5221	11.7991	12.1048	12.4052	11.6127	12.7306	10.4637	12.0478
ENSG00000272921	7.45079	2.63498	2.63498	6.81969	10.6171	2.63498	10.9833	10.4378	2.63498	11.13	11.1258	9.01281	2.63498	2.63498	6.50141	4.88339	7.17568	4.4406	2.63498	2.63498	6.63321	6.41437	2.63498	2.63498	6.92305	2.63498	2.63498	2.63498	8.12916	2.63498	6.45371	2.63498	6.89804	2.63498	2.63498	5.86791	6.99483	2.63498	8.52453	2.63498	9.16901	2.63498	9.14567	6.77495	9.02095	10.4579
ENSG00000163221	4.84786	4.16424	8.1737	6.77999	6.30161	6.01389	4.95112	8.28254	4.37998	10.525	7.23442	7.07007	4.65473	2.63498	7.60639	8.08837	6.01141	7.12342	4.57632	4.39174	2.63498	4.44561	4.90674	3.60116	6.20504	4.32702	6.72413	7.31085	5.69578	8.60798	5.39042	4.74584	6.41058	8.86524	5.37659	4.71316	2.63498	6.39836	4.56357	4.94572	8.25106	9.34188	5.31629	4.26906	4.97294	7.58427
ENSG00000198105	11.8568	14.3266	13.094	12.1579	12.0393	11.8405	14.0336	12.9337	12.9379	13.7166	13.5993	12.2204	10.7896	12.2105	13.1177	13.9562	13.1625	14.0699	11.9265	12.4329	12.4571	13.0463	12.4314	12.311	12.7686	13.017	12.4038	13.6309	12.6198	11.5142	12.8214	12.9805	12.6376	12.2334	12.4836	13.2904	12.922	12.9113	12.4443	11.7766	12.6956	14.255	11.5493	15.7645	12.8519	13.6357
ENSG00000095794	12.7113	13.8468	14.119	13.7923	14.9272	12.4096	13.1406	13.9379	13.0855	14.5498	12.8335	13.4192	11.8157	13.2684	13.6972	14.9936	12.5648	13.7772	13.2331	12.7109	13.0275	13.1842	12.3834	12.9249	13.3983	12.834	13.7942	13.0723	12.9436	13.5423	13.3812	13.1061	13.3673	15.8433	12.4773	12.5468	12.2016	12.5683	13.7297	14.9046	12.5368	13.4212	13.6888	13.9017	13.141	14.2997
ENSG00000107551	15.2103	14.1178	14.0371	13.9782	15.6858	14.6639	12.7556	14.2319	11.972	13.9934	13.6853	14.8207	12.6376	14.1957	15.0384	15.5862	15.3685	15.1104	15.0651	14.5539	12.8044	14.8198	13.0199	14.3337	14.9463	15.2125	13.3564	14.626	13.626	14.7769	13.0975	15.1246	13.499	15.1109	13.6524	15.5452	10.7336	15.0041	13.0982	14.4109	13.5615	15.7521	14.9942	15.3726	13.502	14.219
ENSG00000023041	15.7804	15.2922	16.0561	15.3977	15.4848	15.5837	15.8529	16.1947	15.8495	14.9751	16.017	15.6129	15.5615	14.9965	15.7755	16.305	15.7977	15.0214	15.4508	15.1871	16.3398	15.6272	16.0883	15.951	15.9995	15.6632	16.9006	15.7119	16.4046	15.5699	16.3727	15.6872	15.896	16.8193	15.7601	15.1398	15.8311	15.3571	15.6244	15.3311	16.0974	15.3173	16.0611	14.7557	15.7387	15.8658
ENSG00000184271	11.0088	13.2801	10.7892	10.8193	10.307	11.0972	8.8409	10.452	10.8405	12.9949	10.5387	11.1692	10.3344	11.4519	12.1696	11.9779	10.8376	12.9109	10.3465	11.5432	11.135	11.6184	9.93547	10.6887	10.9666	12.3022	9.70795	12.3914	9.18841	11.402	9.62241	11.7412	11.5557	10.1764	7.85644	12.4406	12.8318	11.4423	9.81795	11.8095	10.0827	13.0852	11.5235	14.5501	11.9691	12.3967
ENSG00000173546	13.7761	19.5612	14.1382	13.5716	11.7213	14.0249	13.5789	14.3874	13.462	17.6715	13.0027	14.4065	14.6619	14.6667	15.2292	15.1977	15.1753	17.2855	13.9754	13.3674	13.9381	14.0585	12.5737	11.8603	13.5125	14.0355	13.7073	17.2186	14.514	15.4662	15.0604	13.699	13.1354	13.8802	13.8763	17.7824	12.8088	15.9695	15.6427	16.3725	14.9744	18.2422	15.7416	20.6786	16.2791	18.196
ENSG00000171044	7.19102	7.58635	5.18636	8.19362	9.77753	5.92495	5.39108	5.79784	8.27813	6.61236	11.1501	6.5626	8.00127	7.56298	8.49671	7.62476	3.59405	6.91818	7.83547	8.33433	7.88772	7.65516	7.42637	7.47959	3.74566	7.88642	4.2079	7.51593	5.13419	6.83176	4.63125	7.11805	9.07972	5.83995	8.76269	7.14579	3.80505	6.92018	6.90405	6.68532	7.78557	7.40256	5.01307	7.7841	5.77505	7.66609
ENSG00000147439	12.948	13.769	14.6043	14.61	13.9121	14.4526	12.0278	14.2309	13.6555	14.0575	15.1181	14.6	13.9522	14.7305	14.1812	14.4071	12.772	13.5578	14.4185	14.0411	14.9184	14.5523	13.4947	14.7189	14.0624	14.0845	15.5227	13.8085	13.7265	14.3697	15.1585	14.6949	14.6945	15.3726	15.8596	14.2252	14.7248	14.151	13.7665	15.1634	13.2626	14.1705	13.6037	12.4889	13.5389	14.2026
ENSG00000176383	6.68414	6.16739	9.66878	6.72876	9.47736	6.2368	8.22693	8.17703	6.26386	6.78975	10.7912	7.72022	7.55656	7.8533	7.15189	7.23036	8.03824	8.30688	5.196	6.9233	8.56204	6.88147	8.48681	6.32002	8.38893	5.8716	8.96482	6.42475	7.08293	6.05623	7.01728	7.31067	7.10603	5.93606	9.45845	8.12955	7.0664	8.14949	7.48644	7.58121	6.14401	6.22733	6.28288	6.26458	5.7138	5.74562
ENSG00000123560	9.55657	16.4578	5.95181	11.8152	7.02371	14.8756	6.13597	13.3704	7.38945	16.1228	5.0893	12.8359	8.88704	12.4743	8.1683	17.6912	3.31927	17.0127	6.00053	13.1417	4.22599	15.7192	5.09267	13.0656	4.47858	10.6619	4.2079	15.6815	5.69578	13.7645	4.17967	13.6579	8.15389	15.1645	3.55502	15.7269	4.98648	13.7841	8.22848	14.7115	8.27981	15.7645	7.07522	18.1147	6.01343	15.2485
ENSG00000196092	7.12376	7.64278	3.72403	14.1584	9.70994	8.61405	6.28146	12.6654	3.68188	12.4388	9.72242	13.8493	4.80864	13.4437	14.7453	9.56518	9.06315	10.1448	7.87613	17.1018	4.84354	11.0296	7.1816	11.0501	8.6157	11.1645	4.52103	11.6098	7.20451	12.6253	3.38979	9.71141	13.3566	6.11067	5.97184	13.4096	12.8817	6.0519	11.4183	12.59	7.23542	8.03451	9.95591	6.51928	5.43784	11.0732
ENSG00000275223	6.04632	4.71537	5.02577	3.62738	4.5981	5.36909	5.65391	4.43387	4.61574	5.05733	4.1575	4.01303	5.53739	5.46948	5.48952	3.49983	7.69065	2.63498	5.32219	4.62871	4.84354	4.22611	4.50015	4.8286	4.72421	3.7971	4.2079	4.16337	4.85479	4.36832	5.9802	5.53145	4.92185	4.73238	4.73628	4.88824	3.80505	4.94278	5.042	5.31084	4.34571	4.33039	4.67618	3.99118	4.1131	4.44914
ENSG00000125744	11.4711	12.886	13.2761	10.912	12.4378	11.8345	10.1541	10.5344	13.3797	12.3913	11.3394	10.9052	12.3187	10.8234	11.7984	11.963	10.6199	13.2488	10.754	11.0841	13.4867	12.4273	11.7373	11.6564	12.6556	12.1927	12.288	12.5924	9.76319	11.8755	11.2045	11.0011	13.0513	11.5917	12.563	11.8527	14.832	11.1123	11.2807	10.6779	10.9778	13.3151	11.3465	14.5767	12.2651	11.2699
ENSG00000259660	4.35795	4.98297	5.02577	4.99306	3.37568	4.29573	4.35134	4.43387	3.38318	4.6312	4.81332	4.62097	3.39984	4.69531	5.48952	2.63498	3.59405	2.63498	4.20896	5.63823	3.9544	3.72426	3.99655	5.10585	4.72421	4.32702	3.57219	4.78643	2.63498	3.67438	3.69094	4.27365	4.92185	3.55309	2.63498	5.82714	2.63498	4.37756	3.36107	5.48268	4.1362	8.05204	5.31629	6.79433	3.87344	4.83547
ENSG00000090382	18.6758	16.5758	19.578	18.7447	21.4094	18.298	15.3995	17.5226	15.7601	18.5071	20.6383	19.13	15.8671	18.7355	20.5216	21.6086	19.3988	19.4034	19.1753	20.1463	16.7557	19.4968	19.8682	20.6621	19.8551	19.1157	22.9622	20.554	20.4528	20.5024	16.5138	19.4076	20.5479	22.5093	26.1782	17.7209	22.6521	17.1735	22.5044	18.2397	17.9029	20.1639	19.7622	16.1225	20.4125	17.5437
ENSG00000015532	15.1816	14.9018	15.111	14.7522	14.0858	14.4797	14.7728	14.0731	15.1804	14.4409	13.582	14.1029	15.3492	15.4726	15.5213	14.3421	15.3849	14.7789	15.7269	15.4199	16.1804	15.0033	15.374	15.4187	14.4391	16.0538	14.6792	14.9605	15.4513	14.2781	15.3884	14.9841	14.9805	13.2823	13.9617	14.8894	16.532	15.1272	14.1583	13.863	15.2031	15.194	14.8712	15.5631	14.6325	14.7335
ENSG00000249231	4.06733	4.98297	4.2258	6.01254	3.6716	4.99416	4.95112	4.78045	2.63498	5.83215	4.70679	4.88011	2.63498	4.69531	3.24599	4.09267	3.31927	4.13843	3.87685	4.39174	3.9544	5.46048	3.75971	5.48595	4.47858	5.47636	4.52103	4.16337	2.63498	4.15652	3.91493	3.7585	4.24017	4.73238	3.55502	4.88824	3.80505	4.94278	4.71244	3.87897	3.27072	4.04369	3.94625	4.26906	3.33631	4.59137
ENSG00000165732	18.7529	17.376	18.4814	16.9614	17.3235	16.7504	19.1272	17.1244	18.8517	16.4378	19.0108	16.9828	18.6176	16.7076	18.5753	17.2944	19.3216	16.6532	18.5637	17.245	18.867	16.5658	18.748	16.3668	18.1421	16.4495	19.6087	16.7821	19.3193	17.7022	20.2185	16.8862	19.3496	18.1778	19.0414	16.4816	18.3593	16.9535	19.5899	18.7726	18.8972	17.0143	18.5602	15.8291	18.5671	18.408
ENSG00000185437	9.21603	13.7021	10.0546	9.32494	9.47227	10.2176	8.31538	10.3404	8.79632	14.0643	6.95399	10.1255	8.88704	9.83397	8.13964	13.9023	8.673	14.3067	8.64891	9.87829	9.1921	12.8909	8.34422	9.95934	8.71199	10.4011	10.434	13.0068	7.66242	10.8692	7.1293	8.92111	9.07972	12.2054	9.67684	10.7233	9.65131	9.41845	8.6278	9.61156	8.48877	12.181	8.89398	15.0338	9.90976	12.4008
ENSG00000103043	16.8854	15.885	15.8812	16.0977	15.8707	15.9691	15.9316	15.3567	15.8615	15.375	15.8228	15.6704	17.0741	16.0419	16.1263	15.1685	15.9418	15.5685	16.4069	15.82	16.5109	15.4364	16.1206	15.5081	16.232	15.3326	16.3158	15.9	16.8457	16.1281	16.9719	15.6667	16.4106	15.4873	16.5804	15.8602	15.9883	15.7365	16.3674	16.0297	16.7872	15.8682	16.7911	15.981	16.6864	15.6637
ENSG00000154642	12.9638	13.3009	13.3224	12.8256	13.3946	12.8954	14.0658	13.2585	14.4383	13.3709	11.2148	13.3101	12.3778	12.2933	12.9363	14.4466	13.3041	14.0288	12.3448	13.4163	12.9188	13.6077	11.6926	13.3351	13.204	13.2721	12.6062	13.0906	12.7495	13.2081	11.5545	12.5756	12.7515	13.7498	13.5316	12.9634	11.7664	12.4867	12.1737	12.8803	13.2853	12.9032	12.6007	13.6544	12.6654	12.5231
ENSG00000164105	12.2327	11.8813	11.9657	11.1528	13.3466	10.8771	13.3444	11.245	11.8474	12.6707	12.5467	10.8596	12.0343	10.768	12.986	12.9514	12.261	12.7154	11.1293	11.1024	12.6469	11.883	13.2915	11.7435	11.0479	10.894	13.083	11.4248	12.4469	12.2761	12.7773	11.2092	11.4974	11.7913	13.7861	11.8223	12.5297	11.7593	12.184	10.5167	12.0408	12.6892	12.1678	13.5558	13.6285	12.3325
ENSG00000143319	16.0179	15.6007	16.0874	15.9353	15.2875	15.601	15.3196	15.6212	16.1416	15.6222	16.2445	15.831	16.7252	15.792	16.1759	15.5194	16.4005	15.4124	16.5057	15.9618	16.4701	15.4996	16.7749	15.5387	16.1299	15.585	16.7911	15.4162	16.8616	15.6704	17.3386	15.5708	16.7628	15.9948	16.59	15.3091	15.9464	15.3682	16.6868	16.2	16.1461	15.59	15.7531	15.2989	16.5736	16.2307
ENSG00000166140	13.41	14.2423	14.6845	14.5824	15.052	15.2475	12.5286	14.5634	14.018	14.5836	15.0834	14.8453	13.5502	14.7636	13.2623	14.1998	13.6578	14.3554	13.5625	14.3654	14.4461	14.8797	14.6387	15.0174	14.7721	14.5223	14.8926	14.8692	13.4413	14.0316	13.4384	14.7122	15.5705	15.351	15.2165	14.592	14.9996	13.9935	13.8827	13.7133	13.5986	14.1523	13.5712	14.6044	13.2306	13.8893
ENSG00000268750	7.56498	7.03151	6.29884	6.64278	8.67001	6.455	9.77879	5.99895	7.3446	4.47821	5.73918	4.52147	5.90773	6.96987	7.7873	5.7305	8.0844	4.56735	7.57632	7.26234	6.63321	5.99536	6.8985	6.64722	7.2695	7.83356	7.14064	5.04098	7.83221	5.6787	7.82154	7.38959	8.4893	6.26613	7.27225	7.15398	7.57143	7.27045	7.3075	7.14041	8.3788	6.91939	6.96295	6.71518	5.76503	7.44633
ENSG00000165730	13.2282	11.6934	10.375	9.83996	7.02371	9.79513	13.7607	11.006	11.7441	9.35999	11.1135	9.89953	12.1719	10.0027	9.04919	9.21489	10.9514	10.1911	11.0145	10.6704	8.65467	9.90831	10.7134	10.1929	9.43062	10.1021	11.8525	9.4155	11.626	9.51879	12.6031	9.69254	8.39813	11.089	11.3131	9.94331	8.86566	10.5873	10.2743	9.93845	11.9904	9.24362	11.8771	10.4129	8.94737	10.6918
ENSG00000175745	11.8417	12.5414	13.6098	12.4694	10.432	11.965	13.6639	11.3907	14.7616	12.8658	12.2924	11.3557	11.8285	12.3933	13.946	12.4381	13.0433	12.3786	14.5033	12.1617	11.7615	11.7964	13.494	11.7435	13.2534	12.5304	14.3805	13.2991	11.9752	12.5242	11.5545	11.9699	11.4579	10.5056	12.9941	12.1491	12.3051	13.4723	13.9341	12.0503	14.2658	13.7253	13.3999	13.5558	14.1456	11.7046
ENSG00000186017	11.9287	12.0079	11.7209	10.9637	13.1903	10.9045	14.8337	11.79	11.9096	11.7272	10.9125	10.7513	12.4632	10.6024	11.6863	12.0383	12.154	11.7559	11.8981	11.2551	11.3822	11.58	12.2353	11.5595	12.4438	12.1287	10.1993	11.5087	12.2256	10.529	12.23	11.211	11.2047	11.6116	12.7701	11.2014	11.1676	10.5881	11.7141	10.7216	12.3943	11.4951	11.6063	12.6046	11.6113	10.5999
ENSG00000123562	18.851	18.2125	19.848	17.7106	20.4467	17.9049	20.3758	18.1009	19.2118	18.1033	18.8783	17.7112	19.6244	17.6373	18.1599	19.3779	18.1828	18.3514	18.7135	17.9697	19.4875	18.3771	19.2048	18.1601	18.8717	18.2513	19.518	17.8851	19.3579	18.9675	19.525	17.8408	18.6026	19.1386	18.7507	17.5478	18.2996	17.7784	19.2116	18.0539	19.4301	18.3008	19.0487	18.4872	18.9903	18.6312
ENSG00000272419	13.8519	13.2177	12.6522	12.9584	10.7666	10.9548	11.5316	10.6498	12.8604	12.9878	12.3322	12.4599	12.9865	12.679	12.3596	12.1877	12.5106	12.8353	14.0936	12.4645	12.5277	12.1576	12.1506	12.3796	14.0876	12.4864	10.0336	12.7387	12.6867	10.9494	12.2242	12.8297	12.3771	10.2766	10.7048	12.2121	13.1885	11.8569	11.7309	12.2311	13.5042	12.4342	12.6656	13.8504	11.6063	11.9919
ENSG00000139977	15.0338	15.2872	14.6855	14.9264	14.6041	14.9754	16.0664	15.3618	15.0896	15.2575	14.5648	14.9177	15.4159	14.3199	14.607	14.5861	14.6165	15.1104	13.6669	14.6488	15.0622	14.7665	15.1393	14.8142	15.2813	14.8496	15.1966	14.7305	14.4096	14.5466	15.4162	14.4935	15.0315	14.1948	15.1467	14.6806	15.1891	14.888	15.2116	15.4632	13.8036	14.7748	14.3669	15.5769	14.9611	14.7874
ENSG00000272420	4.35795	4.16424	4.84329	4.66826	4.36398	4.84174	4.41382	5.47516	4.37998	5.42062	5.79016	4.2946	3.70469	4.8514	3.67832	2.63498	4.24245	4.13843	3.65893	4.62871	3.9544	3.72426	3.75971	3.97802	3.74566	4.81051	4.77079	4.98177	3.61437	3.89524	4.17967	5.91437	4.4612	4.48602	4.73628	6.15758	5.62635	4.94278	4.56357	6.17106	3.27072	4.33039	3.94625	3.99118	3.48986	4.03183
ENSG00000073756	11.2331	13.1731	16.8044	10.9392	14.9102	12.3601	12.3991	12.6654	7.22593	13.3709	16.1356	10.2502	13.553	15.3296	15.3725	14.4818	11.8727	13.3025	13.1039	9.18944	12.4171	12.1643	10.886	9.64709	12.6556	11.0606	13.8313	14.3829	13.7182	12.8599	12.1879	9.28407	16.1509	11.5435	7.85644	11.7476	10.1226	12.9412	11.7965	12.2924	11.3386	13.3005	11.5158	13.9355	10.8428	13.0939
ENSG00000074755	16.8727	18.8155	15.3446	19.31	16.2816	19.3941	15.8736	18.9801	16.6712	18.212	17.872	20.4673	16.3719	19.5776	16.1917	16.1629	15.6483	17.8992	16.9666	19.0074	15.6483	16.835	15.8592	18.0457	16.3425	17.4228	15.9071	18.0706	15.9208	18.5402	16.8454	19.3495	18.5198	17.1073	15.6932	18.8579	16.5774	18.8152	16.7896	18.8301	16.8382	18.1687	16.4697	17.811	17.0647	18.9753
ENSG00000256167	3.81956	5.20572	5.02577	4.52178	5.25519	3.8399	4.28543	4.92408	5.76625	3.50335	4.1575	4.95622	4.75934	4.51759	4.57341	4.94093	4.30173	3.72101	3.65893	4.00869	4.14263	4.68799	4.90674	5.48595	3.74566	4.92072	4.52103	4.98177	4.68927	4.97228	5.2623	4.35327	4.92185	4.48602	4.65924	5.33686	2.63498	4.08417	5.5278	4.6056	4.78518	4.56103	3.7173	3.99118	4.65013	5.42587
ENSG00000137500	15.3124	14.6474	16.0167	14.6722	15.2301	14.9735	15.5345	15.3435	16.1429	15.2924	14.4283	14.6153	15.6904	14.5915	15.0687	16.228	14.8959	15.274	14.6367	14.7091	14.8354	15.6313	14.4831	15.4527	14.5202	15.2699	16.0822	14.9436	14.7681	15.1828	14.2245	14.7314	14.6995	16.612	14.2723	14.4585	15.3684	14.7987	14.7613	14.77	15.3707	14.9868	15.0979	15.011	14.7848	14.698
ENSG00000159082	13.3595	13.8212	12.0034	13.6987	12.3033	13.6273	12.7504	13.9889	12.5369	13.2987	12.2419	13.7309	11.8803	13.5617	12.9613	12.5013	12.6494	13.3862	12.733	13.2088	12.5684	12.7534	11.4789	12.8924	13.2111	12.9101	11.8349	13.4078	13.2335	13.373	11.9715	13.6016	13.6228	12.5083	12.11	13.6965	12.1637	13.9044	12.4755	13.743	12.7899	13.6955	12.695	14.2334	12.5163	13.5367
ENSG00000159202	17.9265	17.7016	17.1271	17.6607	18.3124	17.7083	17.1171	17.6681	17.9971	17.6441	18.1234	17.7679	17.7959	17.5851	17.5524	17.8056	17.9203	17.6506	17.6924	17.631	17.6367	17.6583	17.3149	17.7013	16.8823	17.4413	17.784	17.3877	17.7046	17.5702	17.6377	17.4266	17.8813	17.883	17.7508	17.4382	17.1222	17.4077	17.1319	17.599	17.5709	17.5211	17.8501	17.7135	17.0673	17.4537
ENSG00000136861	14.7553	16.1558	14.4722	15.5003	14.7688	15.3483	15.6246	14.8726	15.6528	15.9772	15.4411	15.2086	14.8696	15.6226	16.103	14.4665	15.5949	15.639	15.2807	15.8841	15.7843	14.6187	15.8552	14.1916	15.7771	14.9789	15.1404	15.4389	15.0522	15.0774	15.9228	15.1913	16.5767	13.7019	15.9437	15.6352	16.0949	15.6177	15.7966	15.5111	15.4234	16.0843	14.92	16.9092	16.1439	15.9063
ENSG00000198937	12.5135	11.6755	12.7356	11.8619	12.4242	11.4776	13.1317	11.2836	13.1838	11.677	11.8408	11.2456	13.4415	11.7806	12.6548	14.5484	12.9246	12.1318	13.2238	12.6033	12.7916	13.3844	12.7395	12.9887	13.2845	11.9779	14.2645	11.8878	14.1019	13.6836	13.1288	11.806	12.7623	14.148	12.2883	11.779	11.4427	11.2753	12.4351	11.6735	12.4824	12.5101	12.6729	12.8779	13.0233	12.7012
ENSG00000131849	9.29444	11.5643	8.88417	10.8566	9.79531	10.2677	9.97093	9.92183	8.24194	11.0415	9.86124	10.7032	8.5717	10.4534	8.73941	10.838	7.92016	11.5161	7.92055	10.2511	9.32956	9.85725	8.06277	10.2316	7.8072	11.0389	9.05964	10.8022	9.22114	9.80328	8.12117	10.4684	8.64324	10.8178	9.00577	9.58388	7.95713	10.2924	7.85548	9.33535	9.55727	10.9116	9.33352	11.8114	9.34706	10.2359
ENSG00000215190	11.3515	10.9044	10.3608	10.1707	11.1065	9.83193	10.6293	9.45344	10.1131	9.09216	11.0453	10.4207	11.5074	11.4222	10.2496	10.0823	11.3609	11.011	11.4307	11.2381	9.99591	11.5082	10.9241	11.4407	10.5028	9.93036	10.4882	10.015	12.5262	10.9689	9.62718	10.3917	9.92574	11.683	12.5084	10.1667	11.1656	10.0998	10.0813	9.44617	10.9246	10.3305	10.8123	10.9992	12.0737	9.64446
ENSG00000188352	16.2879	15.4584	16.4727	15.9128	15.684	16.0262	17.2689	15.5443	17.3434	15.3949	15.5294	15.1974	16.1995	15.3221	15.8935	15.0745	15.8466	15.9331	16.1849	15.7848	16.9845	15.0251	16.5323	15.0643	16.1443	15.6548	16.6023	15.6308	16.1175	15.9241	16.507	15.2896	17.0588	15.19	15.1171	15.3584	16.0304	15.7815	15.9801	15.6809	16.742	15.6974	15.3798	15.9935	17.075	16.0618
ENSG00000003147	16.5608	14.5748	16.7348	16.009	16.0363	15.4375	17.1614	15.6148	17.1541	15.0678	16.3728	15.5594	16.7699	15.653	16.4645	15.4139	16.8305	14.6269	15.8712	14.6652	17.2354	15.447	16.4297	15.6528	16.9476	16.0548	16.2985	14.8397	16.8724	15.7174	16.9714	15.1187	16.0424	15.5307	17.7597	15.1171	18.1309	15.0612	17.1448	15.4873	17.7735	14.8543	16.1505	12.099	17.3147	15.9678
ENSG00000154025	5.77869	5.8179	5.26005	7.29815	5.91457	6.4035	6.01152	7.16853	4.76752	4.39401	5.88689	7.93376	4.9892	6.23938	8.17678	4.09267	5.87661	5.48434	5.26055	8.32655	4.84354	5.79048	5.17681	5.8586	7.19517	6.79394	3.93898	7.11212	5.65314	4.43128	5.29547	6.21525	4.99056	6.4715	2.63498	5.92693	5.52685	4.31084	5.42148	5.63556	5.92654	5.07499	4.83125	5.3037	4.67283	5.72643
ENSG00000178464	10.3528	9.50604	13.7251	11.6993	15.6355	11.2405	13.6209	10.9002	11.3631	10.9582	10.4516	9.53965	11.1003	9.71369	11.0889	12.0521	10.6451	11.165	11.0371	10.8881	11.3065	10.6104	11.7183	11.2629	12.0643	11.1558	12.2095	10.3942	12.2491	12.5223	13.6457	12.1615	8.95733	11.398	10.6786	10.4001	10.99	13.0085	13.9716	10.145	11.5094	10.6043	10.5766	11.1266	13.0528	11.2727
ENSG00000021762	15.7527	16.7824	15.6414	16.4289	15.3048	16.2481	14.7745	15.333	15.3072	15.5145	14.7107	15.7179	15.0569	15.8697	15.4266	15.4619	15.166	16.2094	16.6889	15.7067	16.5009	15.5496	13.2563	15.041	14.7434	15.7151	14.7876	15.8773	15.4545	16.283	15.9514	15.918	17.1125	15.8483	13.0423	16.0854	16.3032	15.7558	16.3193	16.0079	15.0067	16.1854	15.2839	17.8178	15.7986	16.3089
ENSG00000150750	5.52053	7.00302	8.25046	11.2789	10.2674	12.0461	10.8969	11.5758	6.48752	10.5543	9.76391	10.9348	5.29054	9.13126	3.89993	4.88339	5.29294	9.09624	12.6394	9.67291	7.39313	6.3332	8.55695	7.81242	8.71199	7.5189	12.0501	10.2031	5.51682	9.2563	4.96304	8.83611	11.3415	12.0357	12.065	8.99004	13.1555	11.4191	7.89987	10.7068	7.04729	8.16377	6.4892	5.50883	8.50684	9.09965
ENSG00000156076	10.6409	5.35169	5.71449	5.12981	2.63498	3.8399	5.81229	3.94548	16.373	9.17265	3.42225	5.3399	3.93128	7.71223	8.86197	6.09181	3.31927	7.12342	11.2135	7.3571	4.44548	5.18681	13.4781	7.47959	7.14669	5.99824	2.63498	5.94278	11.8407	4.36832	14.2687	6.0293	3.31822	4.17762	2.63498	3.86852	2.63498	5.09978	2.63498	6.86378	8.87335	3.79955	11.0104	5.12686	6.55426	6.46262
ENSG00000160867	16.6941	15.4451	14.7854	16.7231	14.9719	15.9971	16.4741	15.6194	19.2956	15.0711	15.5834	15.3638	17.944	16.1506	17.265	15.1965	17.4862	15.23	17.932	15.7896	15.658	15.2809	18.1962	16.3273	18.0279	15.5917	17.2363	15.4492	18.0872	15.9143	17.8707	16.1432	14.5898	16.656	16.7378	16.5393	17.107	16.9556	17.4297	16.4673	17.2339	15.4975	16.3458	12.4642	11.8555	16.4415
ENSG00000255176	5.01179	4.71537	4.68761	4.29488	3.37568	4.84174	6.16961	2.63498	3.38318	3.84581	9.13501	4.2946	3.70469	6.06746	5.29079	3.49983	4.24245	4.13843	4.34424	4.39174	4.44548	2.63498	4.27534	5.28178	4.25585	4.04079	3.57219	3.90107	3.99579	3.37772	4.17967	6.0293	4.04156	3.55309	3.55502	5.88786	4.33798	5.48459	4.3327	5.63556	4.64245	4.56103	4.21643	3.61094	3.48986	5.27402
ENSG00000121060	17.1906	18.4589	15.8993	17.963	17.142	18.1604	15.9843	17.6351	17.2967	17.4415	17.429	18.6394	16.5857	17.7532	17.0825	16.7553	16.3845	17.2832	17.581	17.5636	17.6296	17.0525	17.1059	17.6579	17.5433	17.0408	17.9217	17.2829	16.5589	18.2025	17.3943	17.8548	17.9749	17.7735	15.7077	17.4583	15.6149	17.406	16.9422	17.4038	17.3773	17.6476	16.2564	16.2113	14.957	16.6478
ENSG00000254676	6.0705	4.16424	5.83814	4.88045	3.98607	4.99416	7.83254	5.56308	3.90416	3.84581	6.79015	6.09577	4.41537	5.3392	5.00655	3.49983	4.92482	4.13843	4.40651	5.00142	5.10872	3.72426	5.25605	4.57383	5.53592	3.7971	4.52103	4.98177	6.35489	4.36832	5.12093	6.67483	4.77268	4.65545	3.9158	5.0428	4.33798	4.61308	4.56357	4.94572	5.05879	4.04369	4.67618	4.59158	3.82749	4.90763
ENSG00000134987	15.5859	15.1233	15.3949	14.6758	14.9511	14.957	17.225	15.1155	15.404	14.314	16.069	14.5563	16.2744	14.2514	15.4375	14.6231	14.5402	14.6628	15.8974	15.0095	14.4346	14.3384	15.1748	14.2495	15.8673	14.6327	16.4597	14.6238	15.6891	14.7368	15.9318	14.454	15.3374	14.935	16.773	14.4484	14.4328	14.8303	16.1653	15.1831	15.2977	14.8247	15.4371	14.8378	14.6539	14.6989
ENSG00000172197	12.6251	13.0182	12.1466	14.7405	14.0496	15.2095	13.1361	14.944	11.0717	13.7897	13.3458	15.3375	12.4856	14.6041	11.7742	14.379	11.6654	13.8275	12.6311	14.3522	12.4671	14.536	11.879	14.5987	12.9937	14.8975	13.0877	14.3106	12.9762	14.1544	12.4659	14.9826	15.094	14.3295	12.827	14.4294	14.2592	14.788	13.4949	14.6281	11.8051	13.5612	12.0274	12.5576	12.6461	14.4494
ENSG00000130545	14.7941	15.4138	14.9115	16.1404	15.8707	15.7504	13.7575	15.2046	15.4379	14.4939	14.9636	16.4237	15.5602	16.3067	13.2455	14.7572	13.5086	14.3297	14.999	15.5644	14.7248	15.5144	15.4159	16.0792	17.1092	15.2342	16.6014	15.1129	15.8491	15.6743	15.2934	15.714	14.9206	15.9018	14.8476	15.1789	15.1517	15.3949	15.2188	16.047	14.9194	13.7958	13.9134	12.0329	13.6777	15.0795
ENSG00000235280	8.38099	8.87426	10.1472	9.16318	10.1146	8.89714	9.40418	8.28254	12.2046	8.05655	9.03946	8.4385	10.4514	10.0027	10.0143	7.8927	10.9342	7.95647	11.5127	9.42427	9.89125	9.16927	10.1981	10.131	10.6022	10.0158	12.1125	8.80009	9.08947	8.6926	9.89834	8.6811	10.2087	8.01199	12.7131	8.6023	12.2753	8.01814	9.08169	7.40405	10.6937	7.63761	9.73185	4.848	9.98042	9.88854
ENSG00000132953	15.5289	15.2471	15.0998	14.1776	14.8568	14.6548	17.6363	14.7221	17.0627	14.432	16.1946	14.5124	16.3785	14.3783	15.917	14.055	15.9894	14.5458	16.6132	14.9459	15.7242	14.0167	15.7444	13.6889	16.9811	14.3181	15.4202	14.6151	16.3668	14.4545	17.0356	14.6587	15.8911	14.4963	15.8948	14.6431	15.1607	14.7275	16.4007	15.2059	16.3919	14.7016	15.4476	15.3978	14.712	14.8428
ENSG00000262583	2.63498	5.0422	3.41397	5.16194	7.65361	4.80072	2.63498	5.38129	3.54641	3.69091	4.81332	6.15932	2.63498	9.03673	2.63498	5.04906	2.63498	2.63498	2.63498	6.96406	4.89157	7.47098	4.50015	6.29351	4.0797	8.90749	4.60984	4.04017	2.63498	3.53982	3.55438	7.4644	4.73257	4.39177	3.75282	3.65193	6.89349	4.66564	3.65154	3.72022	4.1362	2.63498	2.63498	2.63498	4.65013	6.52998
ENSG00000112697	18.0982	18.7341	17.7937	18.2271	17.1304	18.7074	19.0729	19.1522	18.6317	18.7429	18.0582	19.169	17.6556	17.8521	18.1053	18.7643	17.8754	18.8585	18.5673	18.3111	18.1348	18.0403	17.2182	18.3582	17.4511	18.1004	19.3783	18.1445	17.4541	18.3041	18.126	17.9168	18.0004	18.0556	18.7866	17.9383	18.3567	18.3238	18.0902	18.4036	17.5525	18.1374	18.3449	18.9608	18.1192	18.2576
ENSG00000134463	6.97901	7.8803	11.5186	13.1142	7.70084	9.07961	13.0838	12.7586	10.9011	12.4327	4.46271	7.40576	14.2368	13.3119	10.0593	10.0198	7.4822	10.7143	6.5097	9.46556	7.21507	10.7335	13.281	13.3877	7.65621	9.69338	7.90877	14.3358	12.1259	10.3016	6.07716	8.64942	12.1493	14.134	5.55079	8.2296	4.82376	7.58429	5.55316	7.03606	6.15656	10.1429	7.99408	10.3008	14.4311	13.2334
ENSG00000214485	13.3639	11.984	15.2984	13.9686	16.1784	14.5587	15.4845	14.5812	14.9309	13.9448	14.3036	13.1947	14.6866	12.0302	13.4491	14.0626	14.436	14.0744	13.9177	13.2251	12.3324	13.4591	14.7165	13.809	15.1297	13.4578	15.3918	12.7292	13.6808	15.4702	16.0802	14.5236	12.974	13.4654	15.2446	13.221	13.8901	15.6369	16.8274	13.988	13.8939	13.2636	14.2473	14.0123	15.742	14.7107
ENSG00000138658	9.39277	9.10247	9.99028	9.61519	11.6946	9.9748	13.8718	9.85073	10.6373	9.48433	12.666	9.89953	10.7468	10.0197	12.0955	9.92399	11.4692	9.24841	9.69073	11.1294	11.8097	9.04548	11.4284	9.51076	11.2032	8.93596	11.4536	9.54424	11.9489	9.80328	12.5764	10.4542	13.2153	9.44422	10.9833	10.8921	10.9831	10.3575	10.9194	9.91845	11.4382	9.8952	10.8678	9.59654	10.8428	10.9507
ENSG00000185753	15.1075	13.8909	15.5781	14.1662	14.848	14.9741	16.3247	14.7918	14.9767	14.1586	16.0506	15.0733	15.3722	14.6394	14.8113	14.9505	14.7623	14.3297	14.9419	14.612	16.5145	14.7251	15.5451	15.1458	15.3141	14.7081	15.5281	14.5996	15.0081	15.0453	12.9899	14.5245	15.2138	14.8631	14.885	14.5147	13.6169	14.0834	14.507	14.5523	16.3726	14.5905	15.0992	13.5396	13.9879	14.4712
ENSG00000227471	4.44081	5.56515	2.63498	2.63498	2.63498	4.35659	3.66348	3.94548	3.38318	7.30643	5.0035	9.38007	4.47966	7.28817	3.89993	4.38745	2.63498	7.46258	4.77213	7.41697	2.63498	7.95968	5.1354	7.23809	2.63498	3.7971	5.04317	8.47775	3.61437	4.60289	3.69094	7.09728	5.78174	11.2048	2.63498	3.36136	2.63498	3.68032	4.56357	8.3462	2.63498	5.37143	5.97946	5.12686	3.67472	4.03183
ENSG00000189376	14.235	12.8132	15.2621	13.9299	14.874	13.786	13.7327	14.0112	15.8107	13.1122	14.4462	13.4802	15.0367	13.58	12.9238	14.7659	13.9804	13.6867	14.2375	13.3664	14.1599	14.3319	15.5871	14.5201	16.1446	13.9696	16.5769	13.2539	14.5186	14.279	14.4878	13.6084	14.5106	15.5652	14.2593	13.2438	14.592	13.3031	13.8386	13.3021	14.1225	13.5889	14.3082	12.5175	13.5155	13.7764
ENSG00000204580	20.1191	19.4363	19.0921	20.4177	18.4459	20.9978	19.4226	20.3662	21.4511	19.1022	20.0393	20.256	19.7618	20.1828	18.6593	18.144	18.8981	19.0519	20.4662	20.0016	18.7302	19.507	20.0264	19.9533	19.7994	19.8929	19.6228	19.8516	20.3998	19.5349	19.781	20.059	20.6167	19.5623	19.8401	19.7101	20.5226	20.097	19.9327	20.0502	19.8482	18.5189	19.5063	17.2818	20.4087	19.4969
ENSG00000242600	5.20319	5.52501	3.95424	4.84068	4.5981	4.29573	3.88227	5.47516	2.63498	5.05733	5.73918	5.72652	2.63498	5.72442	5.66333	4.62398	4.0436	2.63498	4.57632	3.91316	4.22599	4.44561	4.27534	4.8286	4.72421	5.32813	3.93898	4.71427	3.61437	3.67438	3.91493	7.04403	4.04156	4.17762	2.63498	6.25258	7.01909	6.56409	4.3327	5.48268	3.71934	7.46502	4.21643	5.846	4.88032	4.44914
ENSG00000113361	11.1399	11.0737	10.9487	7.57784	9.81152	9.47664	13.4698	9.61866	11.0351	10.8752	10.6654	9.29138	10.7355	7.04353	11.8931	9.07422	11.0104	10.5799	11.197	8.61848	10.8761	8.357	10.0708	8.71443	9.65827	9.58768	10.5338	10.4119	10.4233	8.90761	13.1391	8.92111	9.80959	7.73182	9.47708	10.7335	7.75569	11.7267	11.5682	10.667	12.4526	10.7321	12.6051	11.6465	12.6291	9.05861
ENSG00000066336	14.4915	12.9989	13.6355	14.5855	15.2607	13.9333	10.9756	13.3015	11.3766	13.7308	12.1648	13.5643	12.0868	13.774	15.2396	15.7154	14.5495	14.4063	12.6724	14.8142	12.6104	14.2709	12.6227	14.2178	13.7201	13.95	13.0345	14.7757	12.7616	15.1397	12.8254	14.2795	13.3647	14.4438	14.5769	13.2032	8.34487	13.9137	14.0565	13.412	13.3832	15.5114	14.5905	13.0857	14.1853	12.6609
ENSG00000182405	9.16128	10.4783	10.8221	10.1505	10.4691	9.63358	10.0448	9.95811	10.9107	10.6385	9.30034	9.89953	8.5717	10.9095	10.1569	10.0747	10.6101	9.96745	9.77508	10.9418	9.99066	10.6409	8.74897	10.4366	10.9455	10.4589	11.624	10.2746	9.60687	9.38173	10.3087	10.4542	9.4411	11.2064	8.06802	10.0022	9.94769	10.1972	10.386	9.36252	10.1061	9.95076	10.1133	10.0547	8.97554	9.34895
ENSG00000254988	6.37179	5.35169	5.32998	8.74689	5.59836	8.87144	3.77917	8.76451	2.63498	6.71183	5.97742	8.94733	2.63498	7.28817	3.24599	6.60173	5.05899	6.5419	4.90174	8.00464	5.83845	7.5518	5.09267	8.71443	3.9799	8.90429	7.24779	7.76474	2.63498	5.83774	5.39042	8.77544	8.69358	10.1201	8.61182	6.77303	10.7208	7.53872	5.18056	7.26101	4.1362	7.74215	4.83125	5.68754	10.7186	7.17291
ENSG00000197782	13.0549	12.7119	12.2217	12.8767	12.1444	13.0681	15.4975	13.0985	12.8624	12.81	12.8499	12.933	13.8007	12.1812	12.8966	12.5047	13.4544	13.1719	12.9892	13.1896	12.8239	12.5594	12.9679	13.0809	12.531	13.3013	12.2786	12.7355	12.9539	12.1992	12.8596	12.7154	13.2761	11.8086	13.2502	12.6599	12.3795	12.5189	12.9357	12.3694	13.2183	13.23	12.6389	13.2983	12.2699	12.703
ENSG00000179774	5.52053	4.16424	3.41397	3.34349	5.59836	4.09134	5.39108	4.78045	3.68188	4.89127	4.91182	5.54659	6.28643	4.69531	4.71257	3.49983	5.18099	4.78812	5.0569	3.68945	4.68784	5.0262	4.27534	5.28178	3.9799	4.32702	5.41757	5.6777	4.85479	3.67438	5.12093	4.90459	5.17781	4.73238	5.37659	4.56426	5.34333	4.94278	4.3327	4.68114	5.57828	3.46932	3.94625	4.26906	6.41496	3.58571
ENSG00000186951	15.853	16.8131	15.9759	17.162	15.4569	17.5359	16.5608	17.2408	14.7663	16.3358	16.6135	18.082	16.0385	17.3276	16.1958	15.3458	15.7798	16.2367	16.9085	16.8589	16.4033	16.0146	16.2851	16.4138	15.9416	16.6484	15.9071	16.7991	15.9326	16.1256	16.0828	17.038	17.3407	16.3465	15.0799	16.5727	17.2766	17.2985	16.2507	17.01	16.648	16.4964	15.2565	16.498	14.0799	16.5608
ENSG00000090020	16.9662	18.65	15.2931	19.0533	15.6443	19.5198	14.4587	18.5614	14.632	18.27	16.9901	19.7054	16.3187	19.1098	15.4743	15.724	15.4459	17.5944	17.7506	18.47	17.0397	16.8836	16.933	17.8316	16.3832	16.9726	17.4385	18.5709	16.2218	18.367	15.8993	18.0853	18.9018	16.8529	16.6547	18.3358	17.1641	18.4643	16.8444	18.9694	16.5016	17.4272	16.5172	17.6996	16.4811	18.3572
ENSG00000204947	9.6229	10.6173	9.80369	9.95885	7.9941	8.22503	9.38477	8.50594	10.9498	10.1746	7.38952	9.12762	8.96651	9.593	9.39775	9.94434	8.69795	10.9731	7.83547	9.44417	9.61896	9.92493	8.68428	8.94357	9.49583	10.5558	8.74049	10.3098	8.75393	9.27797	9.99374	10.1005	7.7305	8.52141	9.50329	9.45427	9.54282	9.29479	7.85548	8.98293	8.65597	10.4933	9.10065	11.8848	10.7668	9.75833
ENSG00000101425	5.77869	4.71537	4.44526	3.34349	5.3493	4.66926	4.47324	5.17184	6.32702	6.52383	3.73535	5.3399	5.14822	5.46948	7.1747	6.86714	4.0436	5.54367	5.196	3.38871	4.44548	3.72426	4.27534	5.28178	4.88183	4.5573	5.21633	4.98177	3.99579	6.62514	3.69094	3.4392	3.31822	4.48602	3.9158	5.78516	2.63498	3.68032	4.3327	4.13738	5.37599	5.61522	5.93652	6.3976	6.50733	5.27402
ENSG00000269713	14.5284	14.1102	13.9852	13.113	14.9193	13.5584	14.6922	14.1785	14.8042	13.8738	15.4028	13.9781	14.3033	14.7633	14.3474	12.6775	14.0421	13.4645	14.8897	13.9457	13.9019	12.8521	14.2271	13.6381	15.5203	13.9594	13.2991	13.3047	14.6057	12.6032	14.3653	14.6547	14.0495	12.4165	12.0807	13.9952	12.9178	14.0111	14.4736	13.9183	14.4271	13.9437	13.9427	14.2506	13.1694	13.5288
ENSG00000170100	11.3978	12.8193	9.41599	11.5576	10.6301	11.599	12.0416	11.3381	11.7441	11.9825	11.9527	12.1886	11.3773	11.9146	11.5251	11.3073	10.9514	12.232	11.3878	11.8117	10.8868	11.1728	11.5446	10.8846	10.4197	11.1949	10.9597	11.4651	11.194	11.1572	11.2303	12.188	11.7264	10.8031	10.7678	11.6704	11.4065	11.5678	10.5159	11.8742	12.2281	12.2366	11.7006	13.7489	11.6242	11.5342
ENSG00000121064	15.5582	15.7696	14.3377	14.9502	16.5689	15.2035	14.5007	15.199	13.3553	16.0101	13.1093	15.2273	15.6416	14.7287	16.3514	16.4681	15.9082	16.886	15.6528	14.8714	14.7165	15.7078	15.119	15.0932	14.0988	15.6158	15.9464	16.1518	15.8612	15.6672	14.4823	15.0496	14.1085	16.3888	15.3258	15.5185	11.2651	15.8413	14.5002	15.6262	14.7922	17.5958	15.2718	17.0776	16.4944	15.2804
ENSG00000243660	8.83732	9.86908	9.8392	9.97318	11.2003	9.65016	10.2302	10.1893	10.0436	10.1919	12.0527	10.1471	8.91402	9.7455	9.94481	10.9479	8.62176	10.1911	9.80696	8.9996	10.2924	10.428	9.16537	10.0467	9.88023	9.71361	9.89235	9.49411	9.63413	9.86838	10.4007	10.0008	10.2805	10.7332	10.3794	9.49181	10.1894	9.76901	10.1695	10.5022	8.97527	9.93353	9.98879	10.4499	10.0488	10.2003
ENSG00000205707	12.6797	13.3114	13.3916	12.3723	12.6794	12.8093	12.6522	13.2992	12.965	13.7426	11.249	12.269	12.0626	12.1038	11.8455	14.1746	11.6191	13.8745	12.0678	12.1863	11.8171	13.6232	12.6281	13.2882	12.0456	12.9129	13.6753	12.5516	11.6294	12.8239	11.7789	12.3255	11.7279	14.1007	12.7365	12.5822	12.439	12.4181	12.9184	12.8533	11.5668	13.1288	12.3211	13.7378	13.4714	12.9739
ENSG00000179097	3.81956	4.98297	5.95181	3.34349	4.92607	3.8399	7.63141	2.63498	4.76752	4.89127	5.63131	4.01303	3.70469	4.23212	5.83249	4.09267	3.31927	4.4406	4.34424	3.68945	4.68784	4.84369	5.65449	3.97802	4.25585	4.97257	4.2079	2.63498	3.61437	3.89524	4.39405	4.74584	3.59261	3.91319	4.48957	4.56426	3.47336	4.61308	5.042	5.31084	4.64245	4.04369	5.56447	4.26906	7.1913	4.75912
ENSG00000143756	15.5595	15.5501	15.5602	15.6471	16.0896	15.8164	16.5433	16.1176	16.3694	15.7021	15.8131	15.9716	15.7981	15.2212	15.142	15.5264	15.4311	15.6321	15.3958	15.3667	16.0404	15.6018	16.0781	15.6643	15.4127	15.714	16.1775	15.3373	15.9571	15.8454	15.5212	15.5169	16.0336	15.4502	15.537	15.2116	15.285	15.5722	16.2674	16.123	15.0057	15.2607	14.9291	15.5273	14.9848	15.6196
ENSG00000167004	20.4386	20.2931	21.2291	20.5515	20.1031	21.1943	19.9396	21.0329	21.2219	20.7099	21.1004	20.7337	21.2607	20.5602	20.2292	21.4937	20.774	20.7968	20.5487	21.1225	21.6837	20.3322	20.855	20.6826	20.4191	20.413	22.0649	20.4794	20.8919	22.11	21.7962	20.3333	21.1522	20.497	19.8936	20.3208	22.2545	20.8569	21.4866	20.7754	20.9051	21.6687	21.5793	19.9891	21.5005	21.8129
ENSG00000124120	16.3537	13.6848	14.411	13.9635	13.4034	13.5898	16.2196	13.4701	14.7771	13.4337	13.859	14.2298	16.6783	13.4745	15.3027	13.2117	15.5117	13.3656	15.4396	14.2902	14.6706	13.0983	15.4209	12.9356	13.999	13.3339	14.3286	13.2991	16.762	13.4115	16.0356	13.2564	13.9715	13.1562	13.4117	13.4686	13.5366	13.0568	13.903	14.4273	15.0554	13.4486	15.7902	13.5107	14.4177	13.8769
ENSG00000151461	15.6632	16.1049	14.405	15.5372	15.5573	15.4908	16.0127	15.8277	15.8319	15.7728	16.4356	15.9256	15.239	15.4039	15.7644	15.0853	15.8466	15.7074	15.4255	15.9031	15.5336	15.1324	15.4459	14.8764	15.2852	15.416	14.6274	15.3044	15.1184	15.5138	16.3136	15.1701	16.8086	14.5128	15.6228	15.3707	15.2127	15.0571	15.7685	15.7227	15.524	16.1569	15.8968	16.3543	16.1828	16.361
ENSG00000123572	8.70958	9.49587	7.84138	6.90521	5.83124	7.19036	10.5008	7.19584	7.58848	10.6532	8.26721	5.54659	7.50065	7.56298	10.23	9.94434	7.24515	10.1911	6.17491	6.94383	5.4603	8.17431	5.09267	6.09265	5.50497	6.50276	3.93898	9.78006	4.85479	6.96441	5.76371	6.67483	4.77268	6.36107	5.0057	7.08716	3.80505	6.14237	6.49071	6.7854	6.95028	10.8302	7.14236	12.9059	10.6816	8.84049
ENSG00000281205	7.63099	11.0365	8.50751	9.16318	6.89742	9.51336	8.79617	9.20778	6.34238	10.3412	9.35567	8.90656	5.7948	10.0671	8.91871	9.03996	8.23183	10.2381	9.63853	9.18944	10.1021	9.24626	8.19087	8.71443	8.97853	10.0852	8.75869	10.2401	5.69578	7.83624	5.71611	10.0215	7.80112	6.66964	6.8656	10.0456	8.37332	9.59247	7.08609	9.11022	8.08506	10.3317	6.53286	12.3008	7.82947	10.1461
ENSG00000124107	16.6119	15.373	13.0608	15.1394	13.2949	14.2355	12.4412	14.2807	18.1314	15.0478	17.8141	14.2713	13.7649	15.9986	11.6428	17.8623	16.9201	15.1699	15.8543	16.8744	13.3939	16.9989	15.971	18.0799	14.3233	17.588	14.7642	14.3358	15.2684	16.7624	13.4969	14.9965	12.0463	15.5818	11.1543	15.5289	15.1547	15.0329	17.1433	14.7075	16.5392	15.0207	14.6064	12.2931	11.9857	16.1811
ENSG00000279152	2.63498	6.89859	6.01587	8.70786	9.09122	6.04796	4.58416	2.63498	8.7311	2.63498	4.81332	2.63498	4.94631	5.89491	5.98349	6.41902	5.76634	4.97682	5.29172	6.07364	6.63321	6.47615	5.56508	8.22889	7.12683	8.10287	6.91527	7.3224	6.64067	7.02172	6.26969	6.80874	5.81894	5.93606	6.71175	7.50682	6.13182	8.18793	3.15108	6.12064	6.1057	7.42068	2.63498	8.477	6.88283	5.47299
ENSG00000142856	12.3367	11.8072	13.7482	11.3092	12.9048	11.8981	14.0708	12.6365	13.2133	12.8754	12.9782	11.5268	13.3583	12.2661	13.2088	13.722	12.3325	12.4441	13.5814	12.2524	13.3328	12.9785	12.9717	13.3396	13.4144	12.0192	12.9029	11.3316	12.6766	12.5824	13.3131	12.2415	13.3755	13.716	12.7519	11.4563	12.3925	11.2921	12.6429	11.1237	12.7348	11.721	12.9936	11.7354	12.1023	12.6902
ENSG00000198113	15.2459	17.1507	16.9017	17.954	16.0495	17.3743	13.6068	16.6527	16.4176	15.8367	16.6403	17.4387	10.9848	17.0668	16.1818	15.5078	14.7236	15.8502	16.9398	16.6816	17.0621	16.4588	15.0058	17.2162	16.9957	16.4253	18.152	16.4149	17.1133	17.213	17.5465	16.87	17.8028	16.3301	10.4632	16.3753	18.4487	18.3996	18.0069	18.7453	16.0945	16.4973	16.1505	14.0852	12.5521	17.0576
ENSG00000213397	14.0452	13.0052	14.7191	13.1771	15.5164	13.0085	15.0568	12.087	12.6511	12.773	13.4698	12.3353	15.3226	12.8066	13.4041	13.8349	13.2398	13.308	13.3694	13.149	15.675	12.9741	15.368	13.3262	14.2201	12.7662	14.3883	13.1801	14.898	13.8919	15.9681	12.7406	13.5703	13.4605	14.5994	13.5895	14.1764	13.0284	14.9462	13.6291	15.0231	13.2785	14.1272	12.8948	14.5104	13.6502
ENSG00000125686	16.1723	15.8934	14.3477	15.1774	15.1059	15.0691	16.5499	14.7642	15.819	14.8899	16.6826	15.5626	16.575	15.5138	16.1593	14.3905	17.2256	15.4215	16.0404	15.8611	15.6782	14.2584	15.4421	14.017	15.0445	14.6896	14.6858	15.0587	15.8986	14.904	16.3571	14.9295	16.8295	13.9523	15.9778	15.0522	15.4589	15.57	17.1608	15.7774	16.5079	15.6507	15.8976	16.3171	16.0132	15.8853
ENSG00000271550	3.81956	4.47053	5.02577	5.12981	3.6716	3.62792	7.21745	3.94548	4.61574	4.6312	5.88689	4.01303	5.53739	4.45227	5.90313	3.49983	5.29294	3.72101	6.72603	5.87267	4.68784	3.41414	4.74789	2.63498	3.9799	3.46752	3.57219	4.16337	3.99579	3.37772	6.25322	5.09041	2.63498	3.55309	5.0057	4.33331	4.56941	2.63498	5.18056	4.13738	5.48082	4.81459	5.17312	4.26906	6.22468	4.75912
ENSG00000174950	4.35795	4.98297	3.95424	4.99306	7.56065	3.34388	3.15733	4.43387	4.76752	2.63498	9.66291	4.2946	5.90773	3.95963	3.67832	7.73799	4.77552	2.63498	5.32219	3.68945	7.84174	5.18681	5.25605	4.8286	5.37375	4.81051	7.53891	2.63498	3.99579	9.05415	3.91493	4.74584	3.31822	3.55309	6.24669	4.56426	4.33798	5.61789	4.71244	3.87897	3.52706	7.58235	3.7173	3.61094	5.9531	5.62636
ENSG00000157150	11.243	10.1492	8.96675	9.32494	11.708	9.93137	9.31748	9.20778	11.6286	10.7072	11.2194	8.94733	8.63145	8.92449	10.6215	10.9361	9.31936	11.8626	8.47457	9.95719	10.0385	10.6053	8.06277	9.67288	8.52013	11.5442	9.18943	11.7445	8.79316	10.3405	9.32462	10.0174	10.3041	11.5046	11.7627	11.3673	9.77548	11.0401	9.25487	9.81407	11.7794	12.6194	9.85537	12.0415	9.53785	11.4433
ENSG00000244462	17.6035	17.2074	17.0994	17.1091	16.9407	17.018	18.7305	17.0635	17.561	17.0917	17.8378	16.9267	18.2507	16.5613	17.1141	16.6913	18.1027	16.8653	17.6419	17.074	17.4652	16.5026	17.0013	16.2607	16.7278	16.4793	17.8142	16.7436	18.5427	16.8916	17.6925	16.522	17.7087	17.0739	17.8263	16.6999	17.6254	16.8577	17.6813	17.7435	17.7494	16.6085	17.4198	16.8517	17.1893	17.2626
ENSG00000150593	18.5102	18.9482	17.3059	20.0602	16.6299	20.9388	17.1036	20.885	18.1363	20.8067	17.4561	21.3404	17.0086	20.4675	17.3479	18.6724	18.0686	20.032	17.3187	20.162	17.1616	20.3001	17.8135	20.7749	16.456	20.9491	16.7208	19.9788	16.4414	18.9915	17.6453	20.3765	18.0201	18.7118	17.7354	20.1482	18.3933	19.7144	16.9529	19.0934	17.4306	18.1252	17.6825	18.0841	18.3445	20.0228
ENSG00000281181	18.8608	19.0491	20.2611	19.8002	20.3972	19.5225	21.4363	19.7587	19.576	19.1327	25.6844	20.3417	19.2805	19.0341	18.9586	19.3508	18.9942	19.2176	18.5177	19.6843	19.0549	20.4443	19.6961	21.2038	20.6831	19.3949	21.0941	18.9564	19.6665	19.0873	20.2746	21.1367	18.9771	20.8784	21.1717	19.6278	19.5785	18.723	19.4769	19.9085	17.8129	17.8578	18.7232	19.5331	20.6012	19.2543
ENSG00000184898	12.239	13.5017	11.2971	10.5874	12.2065	12.2765	12.0071	11.7606	12.3774	12.8126	11.3717	10.7829	11.7211	10.7571	12.2097	13.2789	12.7668	13.2705	11.2219	11.4833	12.5638	13.1596	11.6157	12.6232	11.1937	13.017	10.2928	12.232	10.6815	11.7096	11.8479	10.9906	11.7784	11.5628	9.79189	11.8527	11.4157	12.0003	10.7324	10.2564	11.6681	13.5056	13.027	14.7485	12.519	11.5277
ENSG00000100271	10.7054	11.4419	10.479	10.2113	10.6286	10.5185	10.642	10.0874	10.7295	11.5522	9.64935	10.9121	11.0778	10.6325	11.868	11.081	11.8262	11.7953	11.3759	10.8066	11.0841	11.2617	10.5625	10.7298	10.9441	11.057	10.6432	11.4806	10.4739	10.3006	10.0669	10.4904	10.1204	10.6997	9.59877	10.8569	11.0869	10.3301	10.1915	10.5407	11.0863	11.7579	11.3415	12.902	11.9426	10.7057
ENSG00000188710	5.52053	8.03582	7.21471	7.48847	6.30161	6.84062	5.50224	7.3251	6.2312	7.6361	5.0893	5.54659	6.0123	7.10379	5.83249	5.69846	7.4822	5.7586	5.80162	7.30258	6.95883	6.75039	7.84324	5.96368	5.06642	6.3218	3.93898	7.23951	4.85479	5.60461	4.96304	7.5885	4.77268	5.83995	7.11768	6.97148	6.61952	7.53872	5.78423	7.53415	5.48082	7.07641	5.17312	6.83232	5.9531	7.45786
ENSG00000153922	15.8119	15.6977	15.3433	15.9104	14.1525	15.6997	17.2875	16.623	15.9084	15.611	17.2989	16.6845	16.4727	15.8156	16.0511	14.8886	14.8895	15.2088	16.5203	15.752	14.881	14.6946	15.4925	15.2928	16.1899	15.0222	16.1414	15.2965	16.2465	16.0535	16.542	15.8252	16.3993	15.0211	16.7273	15.3179	16.1253	15.7013	16.089	16.4604	15.8884	15.3526	15.411	14.8832	14.2128	16.0046
ENSG00000161996	14.9051	13.7466	15.0175	13.9606	14.4786	13.523	14.1949	12.8911	14.8792	12.9578	16.2922	13.6357	14.4912	14.9826	15.5675	12.6136	15.3868	12.898	15.5773	13.9923	15.8099	12.7505	16.2976	12.9938	16.0289	13.3906	15.0772	13.5367	17.4272	14.078	16.8081	14.2833	15.9721	13.1956	14.818	14.9088	15.0696	14.0299	15.4633	13.2288	15.8702	14.2359	15.2685	13.2907	15.5665	15.1578
ENSG00000141639	7.5134	14.284	5.02577	6.42806	4.15262	8.61405	5.10228	8.64101	5.48798	13.1916	3.73535	9.02132	7.88056	10.1287	4.71257	12.7709	6.41447	13.0296	3.87685	8.43178	2.63498	11.5192	4.50015	6.8053	3.74566	10.7999	5.41757	12.6268	3.99579	9.94674	2.63498	8.6811	3.79775	9.03228	3.55502	11.3822	4.98648	8.05559	4.56357	9.53959	4.78518	12.6091	5.01307	15.8441	11.0607	13.3643
ENSG00000274292	9.25838	7.98582	8.49643	8.64589	7.4544	8.02332	7.96687	8.49501	7.87786	7.51314	10.2596	8.94733	6.98298	8.42854	9.65112	7.01592	9.86007	7.16117	9.93269	9.40595	9.37866	7.88796	9.91336	8.51214	10.706	8.62614	7.32322	9.05304	9.55076	6.46871	9.29496	10.6204	10.1112	7.12547	7.95855	9.18802	9.46127	9.78303	6.93287	8.03093	9.09493	8.05784	8.27578	7.33359	7.81754	7.66111
ENSG00000198301	16.229	15.6447	15.5535	15.0799	15.4473	15.3056	16.7581	15.1086	16.8708	15.0285	15.5361	14.9687	15.8271	14.8886	16.1299	15.38	16.184	15.3309	15.4471	15.3265	15.9625	15.196	15.9311	15.0345	15.3175	15.3335	16.0059	14.9261	16.6578	15.4151	16.5882	15.039	15.8558	15.3067	16.1558	14.7844	16.0192	14.8953	15.3795	15.3686	15.8363	15.3348	16.0699	15.7643	16.0415	15.2639
ENSG00000064932	17.225	16.5081	17.0355	17.0479	17.4909	16.1464	15.7839	15.7983	17.0581	15.1346	16.8516	16.691	17.0223	16.7468	17.5417	16.6886	17.4171	15.2001	17.1915	16.3389	17.4416	15.4752	17.6275	15.9482	17.1059	15.6853	17.2094	16.3395	18.1296	17.7201	17.6978	16.5948	18.3809	15.1231	17.7429	16.577	16.8284	17.2742	17.804	17.9822	17.3866	17.2343	16.879	14.9338	16.8121	16.2277
ENSG00000104870	20.9068	19.7965	20.1617	21.272	19.5557	20.8696	18.075	20.537	19.6877	19.7514	15.8039	21.1308	19.1056	20.6401	17.9824	19.5109	19.157	20.1041	19.1526	20.2725	17.0627	21.4277	19.1496	21.3637	20.3831	20.9139	17.1031	20.5014	20.1334	19.1407	18.712	20.7808	17.4179	21.5217	17.3143	20.3672	16.1015	20.2743	19.1607	20.3245	19.8369	20.0258	19.4056	18.5535	17.1691	18.8718
ENSG00000103742	11.8268	11.4166	10.7892	10.7214	10.0591	10.7725	9.96619	11.0271	8.74265	11.0296	9.54335	11.3674	9.76822	11.166	12.2914	8.39487	12.7951	11.0213	11.4328	11.174	11.2444	10.1324	11.2779	11.2031	11.662	11.2151	8.8549	12.1331	10.6971	11.0593	12.1768	10.2697	10.4496	8.93593	7.79831	11.6965	7.29208	12.3484	10.0157	11.169	12.4188	12.2788	13.9619	11.0402	12.571	10.9338
ENSG00000249115	14.3807	12.5708	12.7092	12.5828	14.423	12.0461	13.9977	11.5108	13.4824	12.2994	13.8741	12.2977	14.9192	12.7174	13.8867	12.731	14.1224	12.3534	14.5932	13.2546	13.9544	12.5307	14.4672	12.3717	15.5972	12.4222	13.1069	12.4169	14.9816	13.095	14.6809	12.5508	14.8538	12.2612	14.1654	13.09	14.7638	12.7508	13.7248	13.0413	14.3485	13.0524	13.7507	13.2137	13.8352	13.008
ENSG00000136367	10.0555	11.2245	8.74445	9.47503	7.30949	9.44056	8.9166	8.64101	9.05224	10.0866	10.9011	9.19687	9.67982	9.38458	9.76051	7.94753	9.26363	10.2381	9.94826	9.74321	11.2884	8.5264	8.71869	7.99532	9.59655	9.31166	9.44963	10.7741	7.97558	8.0802	10.1718	8.86398	8.42818	7.26647	8.87134	10.2366	10.5764	10.0073	9.10293	9.22421	8.46393	10.7811	9.39761	11.6452	11.728	10.329
ENSG00000232187	13.5077	12.8233	13.2421	14.0386	13.5339	13.7543	10.5696	12.5729	11.2578	12.2477	11.8296	14.1327	12.8658	13.7664	12.7149	12.2459	12.7863	11.9753	12.9488	13.5473	12.1725	13.2224	12.6858	13.4846	12.2418	13.1877	10.9439	13.1559	12.44	12.9014	10.867	13.6024	10.4163	13.1096	11.9007	12.2121	10.2571	13.1728	12.2483	12.5981	12.6442	12.4086	12.621	12.0238	11.8433	13.1316
ENSG00000233452	9.97207	7.77487	8.93974	9.31112	7.82326	8.53589	7.82207	7.85653	7.39679	8.93695	7.55886	7.95169	5.29054	9.27986	6.74231	8.59267	8.01459	7.74928	8.59513	10.1523	7.76375	10.5084	6.5143	9.79765	9.00049	10.4314	8.33609	7.99859	8.49905	8.42575	7.3065	10.3342	9.46882	9.42251	11.8858	7.86159	12.5735	9.29869	7.94293	8.09067	8.49614	9.44497	8.37466	7.3598	7.63656	9.59445
ENSG00000173545	16.1188	15.9521	15.7587	16.3394	16.1735	15.6525	15.0084	16.0399	15.886	15.1039	16.0438	16.1661	15.6057	15.547	14.8905	15.6193	15.0082	15.0765	15.154	15.3419	15.5449	16.0389	15.365	16.523	14.9831	15.8797	16.3087	15.2059	15.7481	16.1565	15.4242	15.455	14.6825	15.9256	16.7345	15.0766	15.4669	15.1986	15.542	15.744	15.8376	14.9541	14.6974	14.6457	15.0756	15.274
ENSG00000162601	14.4725	14.5156	14.5717	14.2977	15.0279	14.2704	15.9567	15.4032	13.3975	14.1918	16.2542	15.2605	14.1549	14.705	15.1843	14.0143	15.5995	14.1847	15.2165	14.7646	15.0001	14.2499	14.0946	14.451	16.1729	14.7775	14.3781	13.8984	15.5704	13.7066	14.2386	15.3423	16.1213	14.3295	13.7961	14.6806	14.3612	14.6781	14.2593	14.7379	14.5229	14.0981	14.1731	14.4706	12.8532	14.5769
ENSG00000138772	16.8619	14.9529	17.4147	14.363	17.7104	15.5527	18.4866	15.2848	19.4127	14.952	17.4148	14.175	17.1339	14.4313	16.5887	16.6976	15.8312	15.7307	16.0679	14.9374	16.8359	15.7015	17.6491	16.2136	17.6683	15.7991	18.4184	14.68	18.033	15.7936	17.5784	15.1042	14.8824	16.1791	10.3794	14.2829	17.7527	14.3184	16.639	13.9265	15.8999	15.1534	17.4687	14.7256	12.4747	16.618
ENSG00000254595	4.59146	6.44765	3.95424	5.49813	4.36398	5.83002	7.97161	5.79784	6.48752	5.70796	9.84943	6.30679	4.41537	6.06746	5.39373	5.24233	5.84081	6.10958	6.5097	6.80486	5.71479	4.84369	4.50015	5.10585	6.0006	5.8716	4.77079	5.6777	7.1143	6.128	6.07716	6.23448	6.92364	4.48602	6.11591	6.25258	5.17659	5.3679	5.67345	6.04148	5.83552	5.61522	6.13925	7.71476	5.9531	5.51856
ENSG00000214300	10.8079	10.0692	11.0335	10.7312	10.8211	10.0805	11.0576	9.13923	10.3191	9.77336	11.2456	9.72298	10.8551	10.5064	10.833	9.47013	11.6824	10.0725	10.7431	10.9882	11.9028	10.4153	10.1231	10.5256	9.21519	10.3573	9.45243	9.97357	10.4373	10.0984	10.7523	10.2593	10.9475	10.0188	10.7956	9.53154	10.4827	9.74916	10.3694	10.3557	11.0588	10.2366	10.3834	10.4845	11.2997	10.3077
ENSG00000153976	9.43261	7.56704	10.1077	7.26981	8.81111	6.36362	6.68095	6.17502	7.4041	6.87799	8.47375	5.59379	6.50199	7.0019	8.56294	7.23036	7.30492	7.23382	8.94479	7.97011	7.76375	7.69451	6.62044	5.33573	7.86222	8.41759	5.63385	7.28746	6.6621	7.69679	10.0084	7.52002	7.64605	6.49259	7.44469	6.5174	3.80505	7.18845	9.60076	7.51488	8.13313	8.09778	9.97835	8.58636	13.6006	7.28729
ENSG00000267751	8.23483	7.98582	9.92155	9.70644	9.11319	7.81349	8.09408	6.89616	6.64422	7.69385	10.5332	9.67255	7.52187	8.17177	9.72817	9.04625	6.61727	7.95647	8.64303	8.09897	8.87602	7.53744	10.8815	9.68813	8.58333	7.98059	5.04317	7.8786	7.51757	8.04384	9.42662	8.89433	9.22711	8.46409	12.2357	8.97167	11.4764	9.10254	9.29602	8.39966	7.09991	7.8261	7.43012	5.68754	8.89047	8.38035
ENSG00000184220	14.4402	12.6851	15.01	12.408	15.2679	12.6089	15.5477	12.3354	14.2408	12.9726	14.1315	11.8513	15.431	11.6817	14.2577	14.2564	14.687	13.5816	14.522	12.4377	14.497	12.4425	15.6987	12.4543	14.3193	12.2606	15.7026	12.5034	14.9735	13.8825	15.3826	11.7116	14.4297	13.9737	15.1432	12.6964	13.7279	12.3235	14.0166	12.769	15.1871	12.8037	14.6873	13.58	15.167	13.7991
ENSG00000055070	18.1591	18.7034	17.5265	18.6596	18.6072	18.5952	17.1387	18.1135	17.7372	18.5205	18.2208	18.5336	17.7787	18.4018	17.5726	19.3163	18.1861	18.6727	18.609	18.4351	18.7622	19.0011	18.7662	18.6835	18.8297	18.322	19.5565	18.4471	18.1708	18.7334	17.7919	18.2793	18.7454	19.4326	18.6755	18.3137	17.9363	18.2373	18.078	18.4741	17.9413	18.4859	18.1363	19.0328	17.9579	18.3065
ENSG00000247011	6.16329	6.2181	3.95424	5.36788	6.20607	6.42948	6.34163	5.17184	6.32702	5.42062	7.46897	6.02923	5.672	5.3392	4.28476	4.62398	5.53847	5.54367	6.0904	5.63823	4.68784	7.03266	4.50015	5.82175	4.25585	5.99824	5.21633	4.16337	5.99707	6.54906	5.39042	6.51145	4.60415	6.4715	7.73773	6.15758	5.88838	6.84715	4.3327	5.11438	5.48082	5.33281	3.94625	3.61094	6.32299	5.90744
ENSG00000087495	11.669	7.16608	7.39277	7.74664	6.03102	6.19189	9.30251	7.0538	12.162	8.48333	9.28726	8.28436	10.8005	7.45927	7.87338	8.39487	11.4288	8.49573	7.79362	7.65928	9.35227	7.03266	6.67773	7.25186	7.71054	8.81513	2.63498	7.8786	8.19656	7.56822	10.8663	9.1114	6.74368	8.47995	3.55502	8.1254	3.47336	7.81476	6.25159	8.64071	12.5583	7.52488	14.8712	8.78295	3.48986	9.58791
ENSG00000260490	3.81956	5.52501	4.44526	3.34349	5.37929	4.88152	4.06166	4.43387	4.61574	4.89127	3.73535	4.62097	3.39984	3.41729	3.49286	4.38745	3.59405	4.13843	3.97001	4.7812	3.72417	4.84369	3.75971	4.57383	4.72421	4.81051	3.93898	3.90107	3.99579	4.80062	4.83101	3.7585	3.31822	3.91319	5.55079	4.75918	4.15441	4.81154	4.56357	3.5278	4.48168	3.79955	3.40905	3.61094	4.60347	4.03183
ENSG00000121957	17.7804	15.8703	16.9935	14.7822	14.6528	15.5191	19.4683	15.2097	18.4876	15.9273	16.4941	15.0288	18.4339	15.1915	15.5105	15.8175	16.2407	15.6208	17.828	14.8374	17.464	15.317	17.8696	15.3462	17.4815	14.6878	15.2044	15.636	18.1719	15.3968	16.2582	14.7596	16.1407	15.0296	16.5917	15.7999	17.7987	15.3486	15.8207	14.8292	17.8574	15.303	17.5472	17.3168	14.9952	15.8541
ENSG00000169246	15.1497	14.4931	13.5456	13.9736	14.9857	13.3007	14.2243	14.6996	13.4707	13.5494	15.8991	14.0341	13.625	14.8742	14.305	11.5217	14.3182	11.6686	14.851	14.3635	14.3495	13.2066	14.5043	13.3824	16.2069	14.0404	12.1684	13.5223	13.3612	11.0616	13.8145	14.4015	15.3905	11.4263	12.9971	15.1422	14.6858	14.3962	14.464	14.6548	14.6616	14.0619	15.095	14.7181	13.2125	14.0352
ENSG00000152990	15.7964	17.123	15.1506	17.3167	14.1856	16.9832	16.3341	17.2323	16.1245	17.2358	16.0863	17.0733	16.1586	17.0441	14.4217	15.7044	15.8802	16.7647	16.9464	16.718	16.3721	16.452	16.5548	16.9473	15.0561	17.2342	15.9122	17.2317	15.1067	16.1467	15.374	17.0346	16.896	16.6701	15.5108	16.6217	17.0426	17.1228	15.3456	17.7495	16.4235	16.4722	15.7688	17.6301	15.1064	16.9624
ENSG00000140521	16.0398	16.3153	15.5464	16.6098	15.49	16.2779	16.1326	15.955	17.5706	15.6433	15.5921	16.1294	15.9842	16.6808	15.8163	15.2407	17.4449	15.6002	15.4087	16.6232	16.7921	15.7693	16.3379	16.0819	16.3478	16.3445	16.3155	16.3689	16.1282	16.2839	16.6309	16.6723	16.9459	15.6267	17.4921	16.3896	18.082	16.491	16.7261	16.2137	16.0752	16.272	16.0507	15.9078	16.2098	16.5039
ENSG00000218052	4.26895	5.48367	4.84329	6.34866	5.00647	4.23156	4.2156	5.47516	3.68188	5.05733	3.96767	5.84778	2.63498	5.84827	5.72723	5.41161	4.46372	5.54367	3.65893	6.90248	5.02604	5.90795	3.88508	6.34605	3.74566	5.02247	3.57219	4.91981	3.99579	4.93141	4.39405	5.00072	4.4612	7.12547	2.63498	5.36595	4.33798	3.38205	4.88748	3.5278	4.78518	6.32728	6.04151	6.26458	6.09538	4.75912
ENSG00000140443	16.6727	17.1745	14.9909	16.2303	15.0811	15.7946	17.6057	15.3197	16.9176	16.3573	17.2203	16.0567	17.1839	16.9085	15.9015	14.6912	16.9944	16.6955	15.41	16.2194	15.6505	15.1005	15.3456	15.0312	16.1048	16.8023	15.2139	16.1361	15.6238	15.3058	17.7531	16.0829	17.1344	13.4292	16.3343	16.0878	16.7991	16.8208	16.595	16.4354	16.8108	16.8754	16.4315	17.9805	15.6944	16.0465
ENSG00000112167	14.0531	13.5573	14.2068	14.104	12.7621	14.7479	14.8073	14.0779	14.5026	13.5874	13.7999	13.9304	14.762	13.6509	13.3809	14.137	13.974	13.8727	13.9866	13.6266	13.5671	14.0285	14.0565	14.2178	13.7535	13.9096	13.583	13.9566	14.2176	13.7446	13.9324	13.5253	13.7196	14.7198	13.7695	13.8403	13.2176	13.5978	13.8205	13.7879	14.0708	13.5515	13.9809	13.2606	14.3388	13.5536
ENSG00000279207	12.9902	11.9298	9.8392	11.4479	11.0056	11.13	13.3759	11.6553	11.7242	11.9609	12.8941	11.538	11.4094	11.608	11.5954	10.8253	12.756	11.7871	13.4918	11.174	14.376	10.8976	12.3009	10.8409	12.2683	11.368	10.8085	11.9439	12.134	10.7677	12.7812	11.1811	11.6672	9.62147	12.795	11.4707	10.6567	11.8552	10.8029	11.9138	13.1905	11.6174	12.1793	12.8779	10.0401	11.4364
ENSG00000164220	12.0635	10.7343	11.4951	8.64037	13.1141	8.01907	12.6857	10.452	11.0808	10.5102	11.0607	9.82615	12.2958	8.26254	10.3882	11.3467	15.1514	11.3323	13.3665	8.19179	13.4032	9.28542	10.3319	8.31003	12.7861	6.76593	11.3464	10.4766	12.9868	9.96265	13.5788	8.92111	11.0059	8.86524	5.37659	9.73855	7.59579	8.9494	9.41457	10.4385	12.8371	11.3181	14.8928	12.099	14.3002	9.13954
ENSG00000155926	13.2282	11.0974	12.5634	14.204	14.3498	12.7228	12.209	14.5129	10.9107	13.9315	14.1437	14.7023	10.995	12.304	15.2535	13.6837	14.0486	13.8768	11.7682	14.3116	11.5348	13.02	11.6079	13.2766	12.526	13.3625	11.8525	13.4924	12.0095	14.0054	12.0882	14.6206	13.7905	13.2655	13.9921	13.2312	9.1522	12.1842	13.9253	12.8154	12.6074	14.5807	14.0115	11.6054	14.9435	14.4193
ENSG00000104872	15.6597	15.5501	16.0408	15.8847	17.09	15.97	15.6935	15.3461	16.9838	15.6553	16.3835	15.6401	14.6903	16.1165	15.3891	16.1871	15.3503	15.8751	15.932	15.9258	15.99	16.159	16.1339	16.3804	15.4251	15.8565	17.0218	15.8054	15.705	16.0051	15.9744	15.9965	16.0396	16.0197	15.7223	15.9828	16.7202	15.6137	16.1118	15.7862	15.607	15.9155	15.5936	15.6521	16.1961	16.0092
ENSG00000172809	19.2946	18.7242	20.1141	19.4528	21.7759	19.4612	19.9186	18.7892	20.1813	19.3689	19.9033	18.4115	19.8684	18.7536	19.5138	20.3282	20.7453	19.6989	20.0426	19.125	19.3912	19.9424	20.0854	19.9317	20.1504	19.791	21.4972	19.1282	20.545	19.6167	20.1292	19.1038	18.894	20.3533	21.0486	19.1994	20.5217	18.765	19.9253	19.1839	19.6967	19.1719	19.656	19.5498	20.2369	19.2413
ENSG00000242349	6.35226	6.91398	6.19232	5.61722	7.33218	4.52272	3.15733	2.63498	3.90416	5.74005	7.60178	8.24855	4.70809	8.02391	5.43285	5.24233	5.76634	5.14208	4.27855	4.39174	6.96958	4.68799	4.90674	5.48595	5.18992	3.7971	5.5932	6.05872	6.15723	6.22929	3.69094	6.70263	6.59214	4.48602	4.73628	6.42546	8.82848	6.93031	4.26736	4.94572	6.1057	6.52524	4.49971	2.63498	4.55503	6.33024
ENSG00000127947	16.7563	16.3756	16.9535	15.6415	16.3533	15.6851	17.4864	16.2784	16.6549	16.241	17.7308	16.2392	17.506	15.9109	17.2096	15.9393	16.7874	16.3198	17.2583	15.2486	17.0337	15.3895	16.9512	15.8367	18.0387	15.757	16.4436	15.8773	17.5452	15.9719	17.3271	15.4265	16.2217	15.3759	16.7824	15.5039	16.7929	15.8256	17.3808	16.3066	16.3231	16.3715	17.4908	16.6333	16.8869	16.0451
ENSG00000178297	4.35795	5.52501	4.44526	4.66826	5.08232	5.49938	5.72399	2.63498	4.94575	6.42946	5.24611	5.3399	4.9892	5.61681	4.71257	4.38745	4.60682	6.10958	4.34424	4.62871	3.72417	4.84369	4.74789	4.8286	3.74566	4.04079	3.93898	6.08628	5.31135	3.89524	4.39405	5.91437	4.04156	5.17272	5.0057	6.17386	3.80505	5.09978	4.12451	5.48268	4.78518	6.00351	3.94625	7.86861	3.67472	6.08295
ENSG00000006831	17.3433	18.5248	17.9799	18.0854	18.4841	18.4906	17.5453	18.5023	17.5324	17.6513	17.2694	19.1184	17.9012	18.0238	17.0814	17.5825	16.9929	17.5392	17.8705	17.9187	17.9695	17.5957	19.1481	17.9842	17.0447	17.4586	17.5763	17.6458	17.6524	18.0793	18.2088	17.9093	18.2791	17.7608	18.1227	17.535	17.8007	17.8942	17.9668	17.9604	17.8372	17.8641	17.3045	17.2696	17.7764	18.0725
ENSG00000274808	7.24475	5.0422	6.76225	6.29316	6.13862	5.83002	5.76883	6.28133	4.71889	5.4982	8.28487	6.41467	5.22123	6.51649	5.24735	4.88339	6.27468	5.60058	6.96205	5.99664	6.9261	5.71499	5.8683	4.37003	6.26105	5.3667	6.21619	6.00193	4.59779	4.80062	6.13231	7.72319	6.18843	4.28956	4.57726	6.41182	5.83422	6.36876	5.5278	6.21976	5.66938	6.02754	6.41333	5.35791	4.00001	5.5408
ENSG00000070193	9.31966	12.1491	7.70037	7.90694	7.74657	7.66897	7.19327	7.93955	7.10557	10.0835	5.38677	9.31925	8.26716	7.61217	9.94398	12.0757	7.19687	11.4252	7.83547	7.12542	6.2469	10.0053	6.5143	8.20787	6.94591	10.4869	5.41757	9.5194	5.69578	10.3273	7.1293	7.53552	6.86319	9.87435	2.63498	10.7732	3.80505	10.3291	6.49071	10.6649	8.07526	12.1619	8.72627	11.8108	9.99584	11.2026
ENSG00000106615	17.0523	16.9317	17.9959	15.9032	18.6017	16.181	18.4903	16.4649	18.0999	16.8038	16.7448	16.3497	17.9687	15.8148	17.2063	18.2206	17.1893	17.2098	17.7003	15.706	18.0777	16.929	18.8721	16.7841	18.3422	16.1238	17.9779	16.4819	18.1923	16.6035	18.0855	15.7981	16.5656	17.8103	18.0297	15.721	16.7654	15.5123	17.4219	15.9418	17.2488	16.6453	17.5172	17.3804	17.2007	16.5507
ENSG00000100302	14.0321	16.5363	10.6046	14.2706	11.2586	15.513	7.37624	14.6387	9.98401	15.6427	9.87004	15.4423	11.7007	14.4098	11.4747	14.3928	13.4656	15.2647	11.5414	14.5119	11.4397	13.7885	12.3941	13.7333	10.6147	14.3091	10.8085	16.3803	11.1811	15.8454	11.0796	14.3435	12.1058	13.1198	15.5485	15.0209	16.3403	14.0069	11.9222	12.8354	11.2139	15.242	12.185	17.6802	15.7474	15.5652
ENSG00000171467	15.841	15.3831	14.7576	14.8351	13.9414	14.8946	15.6427	15.0918	15.2429	14.7309	16.1494	14.9646	15.7026	15.1403	15.4241	13.6055	15.3116	14.7284	15.8562	15.4608	15.1348	14.1924	15.0619	14.159	15.3034	14.6783	13.5063	14.665	16.4546	14.1171	16.0143	14.832	16.5568	13.7261	14.8435	14.9527	14.9848	15.5129	15.5957	14.6912	15.7668	15.0744	15.3347	15.719	15.5776	14.6439
ENSG00000239830	2.63498	3.9018	5.83814	4.09057	5.08232	4.84174	8.68223	4.43387	2.63498	3.50335	7.01886	2.63498	4.19886	4.8514	3.24599	3.49983	4.46372	4.4406	4.34424	4.62871	4.68784	3.95451	4.50015	4.8286	4.72421	4.5573	3.93898	4.16337	4.85479	3.89524	5.12093	4.49829	3.31822	2.63498	2.63498	4.12507	5.34333	4.94278	2.63498	2.63498	5.03102	4.97686	4.43487	5.68754	4.1131	4.75912
ENSG00000117242	12.0425	12.2075	10.9005	12.2506	13.3537	12.0809	12.2422	12.3476	11.7062	11.5639	12.5554	12.1858	11.2681	12.3453	10.8779	10.9909	11.8285	10.6577	12.8247	12.0744	11.6835	11.1082	11.012	11.5182	11.8177	11.8189	13.5927	11.8965	11.988	12.5999	12.7124	12.3166	11.7474	11.0812	13.5518	11.9661	13.051	11.9166	10.8738	12.9274	11.9311	11.8316	11.9906	12.039	11.8109	12.5395
ENSG00000167371	10.2464	11.0126	9.37223	9.82545	7.46127	9.5239	9.0048	11.0883	7.89868	11.1957	12.3843	11.9521	8.60188	12.5184	9.90961	11.0633	10.3882	10.7854	10.0078	10.1246	10.0077	10.1771	9.23832	10.7674	11.677	11.0257	7.96475	11.7098	10.8664	10.3016	10.0867	12.5227	11.4262	8.47995	7.11768	12.6924	8.95932	11.5449	8.65394	10.9599	8.91425	11.5836	9.74268	12.3518	9.09787	11.4166
ENSG00000270800	10.9743	10.447	11.3848	10.9023	13.2135	10.4476	12.4991	11.0175	11.8272	11.2198	11.3298	9.79423	11.6542	9.61556	11.8988	11.47	11.9523	11.0136	10.8167	10.709	9.35431	10.7973	11.6339	9.17411	11.3743	9.57366	11.9655	10.6167	12.3635	10.3929	12.3471	10.0352	12.1616	11.3911	11.6316	9.70836	11.123	8.80027	10.6937	9.42828	10.9292	10.734	11.605	10.2475	11.7825	11.062
ENSG00000228925	4.84786	4.85596	4.2258	3.92993	4.92607	3.73996	5.60516	5.05366	5.3712	3.84581	10.1092	4.71324	5.47968	5.23271	6.41757	3.84103	6.42652	4.78812	5.46522	5.11797	5.18664	3.72426	5.59552	4.57383	7.44006	4.81051	2.63498	4.16337	6.96739	4.60289	5.42068	5.43372	6.17422	4.17762	3.9158	5.11387	6.30037	5.73957	6.86469	5.5225	5.91177	5.40899	5.7504	6.3976	5.00826	5.35204
ENSG00000227252	5.44777	6.38258	6.1359	5.63986	5.40864	5.79019	6.49512	5.56308	7.48209	6.46796	7.42183	5.72652	6.35141	6.53123	6.3285	6.25389	7.29185	7.35274	6.75911	6.24962	6.56386	5.49117	3.99655	5.70506	6.4494	6.80774	5.92256	6.78436	6.45663	6.62514	6.51014	6.0512	5.87297	6.29046	6.81613	6.46559	3.80505	7.18845	5.33601	5.63556	6.86917	7.23853	7.3991	7.19486	7.29137	6.15606
ENSG00000231006	4.72602	4.27539	10.9248	11.9818	6.28612	3.73996	8.18672	7.16853	5.40133	4.83096	8.83298	3.62721	4.54077	3.85084	4.02435	5.41161	4.4121	4.56735	5.51853	5.11797	3.41407	3.72426	4.8559	4.12433	5.44091	4.48523	5.16103	3.90107	4.39202	4.07623	5.45028	4.62809	2.63498	3.55309	4.94331	4.71316	4.70286	6.0331	6.39705	4.24692	4.64245	4.1475	5.67372	4.99469	5.79489	5.62636
ENSG00000160949	13.7199	12.931	13.9901	13.6987	14.7116	13.3663	12.0704	12.4231	14.1965	12.5581	13.8127	13.0733	14.1549	13.7687	14.065	12.0838	13.1141	11.7976	14.7074	13.9905	15.0736	12.9467	16.7762	13.4806	16.6254	13.1269	16.2151	13.707	15.9481	14.1066	15.7445	13.5897	16.9224	12.5326	16.5471	14.0598	14.9767	14.2777	15.0613	13.4158	14.6411	13.5644	14.4155	11.9027	14.5767	13.8289
ENSG00000267573	5.06224	6.14134	6.71189	6.51543	5.28728	6.1766	5.30141	7.51042	9.43714	6.97451	6.60514	8.46993	5.03075	6.25726	4.13583	6.25389	5.53847	6.35847	6.01897	6.12876	4.14263	6.01639	5.1354	6.37161	4.93043	5.3667	6.0172	5.56378	5.77736	7.93883	5.76371	6.64648	6.57067	6.08302	6.38925	5.33686	4.88025	6.19401	6.12347	6.44101	5.086	4.92495	5.67372	4.848	4.21573	7.78529
ENSG00000179195	18.2059	18.4706	17.8349	18.5813	17.0272	18.6252	19.3355	18.763	17.8149	18.4393	19.2345	18.5905	18.5789	18.524	18.1222	17.7353	18.5898	17.9671	18.9573	18.4778	18.7381	18.2182	19.2803	18.3691	18.7852	18.3691	18.2185	17.8919	19.0375	18.1441	18.388	18.4082	18.947	17.5307	20.0233	18.015	18.6677	18.4923	18.8433	18.6442	19.003	17.9081	18.2676	18.2373	18.2193	18.3975
ENSG00000281005	7.7397	7.76643	7.33584	6.42806	6.12124	7.02186	8.42314	7.19584	8.59745	6.52383	7.72337	7.95169	6.77443	7.6664	8.65489	7.56462	9.42773	8.49573	8.03272	8.84491	7.09266	7.70097	8.10502	8.45383	8.3076	8.65307	6.16213	7.70424	7.44545	6.54906	7.51321	8.83923	7.64605	7.26647	8.31301	8.76584	8.04819	7.10149	8.76471	7.18987	8.3052	7.98668	7.8696	9.00652	8.60859	7.2743
ENSG00000110324	14.5764	14.1427	12.7442	16.1068	15.6352	14.6819	12.2413	14.6534	10.8506	15.0495	13.6705	15.0247	12.3373	15.3534	16.3654	15.4674	14.2168	15.3087	12.7089	15.8499	12.9465	15.1213	12.4833	14.7967	14.1198	15.7401	12.6239	16.1371	13.3846	15.9398	11.5616	16.1998	14.5749	15.3115	12.7187	13.9419	11.5903	14.2738	13.7661	13.9295	13.4719	16.6699	14.8211	14.2277	13.6421	13.6365
ENSG00000105397	16.5451	15.7822	16.2568	16.6897	16.3618	16.3618	15.3457	15.9157	16.3136	15.7741	15.7515	16.4101	16.486	16.982	16.9468	15.3885	16.5658	15.5376	16.4976	16.5491	16.6614	16.0029	16.7193	16.2236	17.4664	16.19	16.5792	16.3105	16.8583	16.1217	17.2036	16.8041	16.8759	15.1782	16.583	16.7287	16.6508	16.6165	16.4456	16.2653	16.6376	16.3139	16.6063	15.6844	16.7127	16.2935
ENSG00000161912	9.10727	6.2181	8.91222	6.70774	10.0882	5.61849	10.4086	9.44778	7.85673	7.11419	8.41082	8.33986	7.39724	8.57029	9.06756	5.24233	8.8189	5.7586	9.05731	8.15713	7.88772	5.83865	9.14021	7.68634	8.77067	8.68324	8.88835	7.0014	8.75393	4.15652	7.92333	6.90753	6.92364	5.9667	5.17715	8.1254	11.3699	8.13207	5.55316	6.68532	9.95128	6.32728	7.53369	5.846	4.78071	6.23911
ENSG00000144199	12.1539	11.8067	10.4059	11.1991	11.84	10.7605	11.1535	10.6449	11.4472	11.7444	11.1441	10.4821	12.3275	11.2043	11.7651	12.4686	13.0087	12.945	11.067	10.6895	11.914	12.5003	9.50199	11.4909	11.6761	11.9886	12.8332	11.9565	10.8836	11.2911	10.4099	11.2373	10.9964	11.6319	12.2369	11.6686	10.8436	10.862	11.3991	10.7791	12.0008	12.2638	10.5696	13.4991	13.8803	11.5307
ENSG00000075131	10.3997	11.0711	12.1616	10.4507	12.0839	10.5997	12.3447	10.6621	11.3131	10.7699	12.6635	10.499	12.4404	10.0531	10.6064	11.6737	11.7635	11.0766	10.5256	11.3725	12.1378	10.6839	12.0938	10.9461	11.8808	10.4589	12.8203	10.656	11.488	11.7524	12.5704	10.0434	13.0584	11.916	12.6213	10.6024	12.0205	10.4778	12.1122	11.0028	11.8337	11.0933	11.8336	11.3786	11.2665	12.1189
ENSG00000100804	17.0412	16.7407	17.9739	16.9793	16.988	17.2762	17.2847	16.6742	17.2009	16.6947	17.2638	16.5276	17.9957	16.5886	16.2046	18.0478	17.4945	17.2555	17.0746	16.5938	17.5555	17.3966	18.2724	17.3688	17.811	16.5673	19.334	16.976	17.8173	18.0008	17.8783	16.4845	17.1815	17.8438	17.7352	16.9085	16.9014	16.742	17.7446	17.1515	16.418	17.1841	17.1966	17.2426	17.6998	17.3357
ENSG00000161267	16.0399	16.7916	16.1834	18.3738	16.7631	19.1027	15.5282	18.1454	15.5192	17.1446	17.2645	18.698	16.1143	18.4927	14.6406	16.9521	16.5491	17.1799	17.287	17.5899	16.6883	17.8201	17.2156	18.3241	16.0316	17.8736	17.0454	18.438	16.5895	17.5405	16.7375	17.6659	16.4055	18.8662	16.2104	18.0842	16.6508	18.354	16.4992	18.4284	16.559	16.3362	15.9682	15.0097	16.9644	17.6814
ENSG00000143437	15.9221	16.651	15.2752	16.5735	15.4656	16.538	15.6139	16.3927	16.0105	16.4785	16.0312	16.5553	16.0635	16.3641	16.2502	15.9034	16.3555	16.5773	15.5245	16.5444	15.5528	16.3236	15.8603	16.1504	15.5709	16.4893	15.3099	16.4204	15.6133	16.0193	15.7891	16.3875	16.2454	15.7743	15.9613	16.0624	16.8183	16.4793	15.7976	16.5331	15.5069	16.6707	15.6873	17.2117	16.8183	15.8576
ENSG00000258136	5.65555	4.71537	5.60707	4.29488	4.15262	3.62792	7.43927	5.17184	3.38318	2.63498	9.03425	5.72652	4.9892	5.46948	5.57914	4.38745	5.84081	4.4406	4.7259	5.11797	4.44548	2.63498	3.99655	3.60116	5.76156	5.47636	4.52103	4.16337	5.13419	3.37772	5.53548	6.9312	5.44204	3.91319	4.48957	5.88786	6.13182	5.51229	4.56357	5.77336	4.48168	4.04369	4.83125	3.61094	3.13331	5.04114
ENSG00000162623	12.4674	14.451	14.0925	13.7568	13.9065	13.5183	15.379	14.0145	14.1502	14.5018	14.5811	13.284	14.6997	13.8226	13.5175	14.7096	14.2149	14.7417	13.4317	13.624	14.2513	14.4667	13.8045	13.9513	14.4926	14.3809	14.8994	14.3334	14.2601	14.1382	14.067	13.6506	15.2527	14.4096	14.6659	13.7627	14.3863	13.6729	13.2122	13.9511	13.1952	14.591	13.5254	15.427	15.1791	14.5861
ENSG00000144749	16.7028	19.6312	16.0064	16.9814	16.4744	16.7886	18.0236	16.7936	17.6461	18.3971	16.4647	16.5917	17.5891	17.7017	17.5502	17.9539	18.9073	18.5745	17.5845	17.3907	17.2727	17.6928	17.6125	16.8361	14.973	17.7472	15.0703	17.9457	15.7536	17.2274	16.2827	17.1658	16.5613	15.8849	15.8948	17.8036	14.7266	17.4662	17.2527	16.7787	17.9498	19.3649	18.0401	20.5476	18.1179	18.0345
ENSG00000116833	12.8084	15.1199	12.3289	16.1344	11.3232	16.4479	12.8346	16.7873	14.0878	15.5738	13.6659	16.4101	11.3937	16.5667	11.4747	14.8395	10.9431	15.0947	13.0669	15.9239	11.3233	15.7348	13.2241	16.1946	12.2905	16.2911	12.1573	15.4329	13.3263	15.9364	12.2671	16.1756	13.1215	15.3898	8.26478	15.7815	8.70337	16.5269	14.1483	15.26	12.1603	14.5246	13.0047	12.2025	9.41588	15.2887
ENSG00000134250	17.6214	18.5389	16.2488	16.8846	16.8442	17.5255	18.0743	16.9842	15.679	17.8945	18.8131	17.4143	17.5474	17.9554	17.8842	16.6014	17.5468	17.6815	17.1524	17.9764	17.7238	16.51	16.6666	15.7089	16.4935	17.3577	16.6689	17.6955	16.525	16.7932	17.0311	17.6052	18.7681	15.2669	15.9733	17.5126	16.0766	17.9835	17.1537	17.642	17.199	18.586	17.3964	19.1845	18.1522	17.9292
ENSG00000140104	12.0769	11.4571	12.5634	10.6607	11.8978	10.0998	12.0556	10.6123	11.5432	10.3257	12.6782	10.3105	13.4202	11.7531	12.1244	11.3663	11.7016	10.9903	11.8549	10.4829	12.7096	11.5192	13.7244	11.1536	12.4962	11.3021	13.0148	10.6605	12.894	10.6608	12.7484	11.9236	13.6228	12.1038	11.718	10.8823	12.454	10.5294	13.125	11.6908	11.613	11.5926	12.2183	12.3444	13.2687	11.2263
ENSG00000211947	13.0761	14.4481	11.7425	18.0983	14.0829	17.0077	10.5372	15.6607	6.26386	13.712	13.197	16.4159	5.53739	14.6032	15.6516	13.0012	13.6563	16.0051	10.7132	16.8506	8.37301	15.2117	12.497	15.1318	10.3119	14.198	5.82111	16.7084	13.9825	16.9447	12.864	16.7727	15.702	16.3992	6.43377	10.6744	6.45107	13.3663	13.5341	16.7834	10.7732	15.4626	14.2368	8.84912	17.2479	12.8948
ENSG00000004700	15.1352	14.7814	15.4867	13.8047	15.047	13.4238	15.8101	13.6634	15.1829	14.4417	14.3076	13.3827	15.4162	13.7325	15.4629	15.2021	15.0542	14.9744	14.7067	14.3532	15.0089	13.9836	15.2634	13.7575	13.9659	13.9812	13.663	14.2413	14.9251	14.0564	15.6521	13.5476	14.9079	14.0743	13.9459	13.9102	13.8043	14.0308	15.029	14.0168	15.1443	14.947	15.9147	15.818	15.1454	14.9064
ENSG00000141560	14.6852	15.7684	15.1604	15.5323	15.718	15.4898	14.6707	14.2408	16.2921	16.3997	15.7805	15.2384	16.2952	16.0534	14.8699	15.4606	15.9216	15.8233	15.6607	16.0161	15.8912	15.96	15.2154	14.9896	14.8947	16.3635	16.1666	15.7917	15.884	15.6871	15.6004	15.961	15.5711	15.5033	15.1605	14.8412	16.4408	15.7721	15.0678	15.9968	15.2628	15.3918	15.6033	16.56	15.059	14.8152
ENSG00000005436	12.7819	12.8896	13.3965	12.696	13.5472	13.0197	14.2249	13.4631	12.2033	12.9079	13.8206	13.1681	14.5791	13.0573	13.0421	13.4882	13.3516	13.094	13.5559	13.5089	12.874	13.1874	12.5928	12.9348	14.3562	13.987	13.5641	12.4707	13.4961	13.1077	13.1108	13.2162	14.5001	13.9305	13.3086	12.9026	13.3575	12.7494	13.3447	12.7314	12.661	12.9002	13.1499	13.3533	13.829	13.3299
ENSG00000246465	5.01179	4.98297	7.84138	5.49813	8.10794	4.09134	6.34163	4.43387	7.28253	5.25101	5.88689	2.63498	6.70174	5.3392	6.39826	4.88339	8.72248	5.35747	6.00053	6.58707	8.80295	5.0262	7.24916	6.23895	8.80226	5.73245	9.05964	5.94278	8.0903	5.0879	4.63125	5.09041	4.04156	3.91319	12.1973	4.71316	3.80505	5.61789	6.32617	3.5278	8.01497	4.04369	5.93652	3.61094	9.55877	5.62636
ENSG00000228612	3.48403	5.85056	4.51038	6.49101	3.98607	5.88774	4.91049	5.56308	2.63498	4.20549	5.73918	5.39454	4.19886	5.37294	3.75807	5.45088	4.65112	5.60058	4.40651	4.62871	5.26033	3.72426	4.09741	3.97802	3.74566	3.46752	5.26947	4.98177	2.63498	7.19778	5.29547	5.43372	5.08743	4.65545	3.9158	4.9286	3.47336	6.36876	5.47566	7.45549	4.19224	5.02682	4.67618	4.38633	4.00001	4.79785
ENSG00000137726	14.712	19.2797	14.0082	13.4665	13.4873	14.8939	12.8726	14.7757	14.5569	19.0934	11.5474	14.8333	15.253	15.1473	12.885	19.1358	13.2133	19.5587	12.9858	14.3504	12.2673	17.9853	12.2288	14.3433	12.1255	16.1099	10.2565	18.2886	11.3986	16.4978	12.3352	14.9812	10.7404	15.8324	10.9127	16.9156	10.4718	15.0192	14.182	14.9214	14.3125	19.1247	15.5897	21.2603	16.2397	18.0306
ENSG00000237506	6.25038	4.47053	9.17098	5.19333	7.77443	6.48007	7.11817	6.68082	5.8114	5.77143	5.68628	2.63498	5.32392	5.96211	6.05952	7.71446	5.85882	5.42236	5.43777	6.53382	5.97381	7.49348	6.86193	7.876	7.34017	6.64808	7.38319	4.98177	7.96703	6.8739	6.49624	7.52002	5.76276	7.58301	5.32938	6.14111	6.68171	7.24634	8.09913	5.35585	6.96454	4.56103	6.00045	6.3976	8.40694	5.64695
ENSG00000159111	15.8889	15.9922	16.2631	15.6806	16.619	15.8034	14.9804	15.3956	16.5268	15.9481	15.7006	15.3811	16.4372	15.5333	15.8099	16.4723	16.6727	16.6903	16.0428	15.542	15.913	16.7343	15.7795	15.9583	15.3334	15.865	16.5332	16.1318	16.1669	16.0715	16.072	15.4075	15.9451	16.7202	15.9378	15.8426	15.5395	15.5341	15.8748	15.8245	15.9658	16.1035	16.1604	17.0761	14.9903	15.6241
ENSG00000163291	13.4619	14.213	13.1489	13.476	14.3371	13.7541	14.8909	13.5415	14.2806	13.8966	13.049	13.341	13.4927	12.8535	13.6743	15.1952	13.6814	14.3389	13.2828	13.4822	13.678	14.1816	13.2061	14.1358	14.0882	13.8512	15.8689	13.8296	14.9996	13.8985	14.3975	13.6016	14.4892	15.263	14.5703	13.185	13.7022	13.5767	13.3916	13.539	13.4478	13.809	13.4987	14.2774	13.5961	14.1116
ENSG00000113657	18.346	20.3641	18.2302	15.7824	16.5829	16.8695	16.7081	16.48	16.9037	19.7371	16.1503	16.3165	17.7246	16.7627	18.7183	19.7358	16.9407	20.514	17.0983	16.3732	15.5404	18.0657	15.4007	15.6279	15.2866	16.9506	16.5711	19.3863	14.2959	17.683	17.0498	16.0293	15.3103	16.3418	15.1064	18.6183	18.5926	17.8068	17.641	17.1721	16.3458	19.6249	18.7098	22.3647	20.0391	18.7318
ENSG00000169429	16.49	9.22138	23.2699	12.876	18.8334	17.3346	13.9707	10.8302	14.3776	11.6518	19.5037	9.58914	16.0308	15.177	18.6483	13.163	15.6617	9.96745	15.0111	9.02384	15.8419	10.4016	15.8663	11.7245	19.1592	10.1021	21.3357	11.5625	18.1165	15.0211	16.8443	8.18773	16.0172	12.496	13.3876	7.85659	11.5817	6.84715	14.8429	11.042	13.9724	11.4556	15.7652	7.10471	12.9723	12.9828
ENSG00000025770	15.345	15.2713	15.4699	15.4514	15.5184	15.1267	14.8714	14.2675	13.8083	14.9712	15.3449	14.6952	16.6063	15.3335	15.1527	15.7371	15.6385	15.2883	15.3133	15.3935	16.0766	15.6784	16.4182	15.6988	15.7414	15.2413	16.1557	15.1422	16.1772	15.8206	16.3716	15.2614	16.5417	16.144	16.2218	15.3156	15.8428	14.7211	15.1235	15.3552	15.2504	15.1253	14.9649	15.5615	15.0741	15.2718
ENSG00000240342	16.8526	16.1269	15.9366	16.7766	19.817	17.7939	16.9521	15.5181	11.5453	10.4397	17.435	16.1688	17.7422	16.5335	17.4996	17.4279	11.9087	10.8759	17.8744	17.1991	17.4588	16.9759	18.1642	17.5722	16.178	15.9889	17.6644	15.4199	18.6892	17.4347	17.3095	15.9888	15.9353	15.6732	17.5771	17.1067	18.6501	17.4473	16.9868	15.5084	17.6949	16.672	17.4357	16.3189	18.511	17.3085
ENSG00000150510	9.46461	14.5249	8.62407	8.22345	8.76744	8.82351	7.91856	9.20778	9.68635	13.0262	9.44473	9.22662	9.04183	10.0821	10.2906	12.8726	10.8104	13.3553	8.56437	9.27675	7.39313	11.6107	7.30465	9.08473	8.19307	11.0925	9.82485	12.8435	7.72466	11.0502	7.61283	9.00416	7.7686	9.12932	7.73773	11.5902	4.56941	10.6883	9.03604	10.7205	9.35336	13.5933	9.28775	15.5242	11.2535	11.5905
ENSG00000163297	16.7022	19.3556	16.4509	17.838	16.5163	17.868	17.144	18.0413	17.6172	19.3506	18.4113	17.8064	16.2067	17.9703	16.2796	18.3911	14.8531	19.2566	16.2194	17.4787	17.3144	17.8617	15.4222	17.2266	14.9197	17.6188	16.7167	18.7843	15.5797	17.96	17.1085	17.4687	17.2536	16.3774	15.3035	17.4728	17.1807	18.0698	16.4758	17.2695	16.0808	18.8365	16.7232	20.6086	17.3999	17.9806
ENSG00000034053	11.1077	9.3341	11.2352	9.09827	10.1026	9.47664	9.37048	8.03325	8.76832	11.1203	9.96068	9.72559	10.9553	10.641	10.8082	9.51844	11.4954	9.42915	11.4842	10.3445	10.5054	8.88478	9.88335	10.1513	10.5257	8.96388	8.88835	10.1096	9.63413	10.0523	12.0653	9.50861	10.3266	8.68086	8.52748	9.78663	6.78445	9.3784	10.5945	10.3745	11.7326	10.2556	13.1683	9.24285	11.6555	8.84049
ENSG00000271737	5.01179	6.44765	5.95181	6.09621	8.2496	7.57938	7.30281	6.89616	7.72884	5.70796	6.66048	7.07007	7.64948	6.83408	5.66333	5.69846	6.01141	5.7586	6.0904	5.97672	6.05734	7.60096	6.032	7.25186	6.2972	6.50276	8.12072	6.4461	7.03455	4.93141	5.50766	6.58803	5.28967	7.54327	9.10497	5.88786	7.23113	7.10149	6.70668	5.31084	5.57828	5.61522	6.73316	6.11783	7.1913	4.03183
ENSG00000173436	15.6313	16.7853	15.7241	17.1752	16.6552	17.8126	15.7493	17.329	15.6405	17.5226	16.1847	17.4397	15.3117	16.9821	15.3335	18.0129	16.3686	16.999	17.2303	16.6381	16.7521	17.4477	16.8787	17.5865	16.5838	16.767	17.607	16.9308	15.9737	17.4567	15.7992	16.5916	16.1714	18.4431	16.0461	17.0434	16.423	16.4148	15.9498	16.7408	16.4661	16.5439	16.348	17.3113	15.4195	17.4234
ENSG00000260997	7.39487	7.16608	4.68761	7.62333	7.36188	6.90669	5.13756	7.65506	4.76752	7.85439	8.42681	7.32546	5.14822	6.96987	7.96771	6.51329	7.34343	5.94496	5.69053	8.08059	6.95883	6.3332	6.13834	6.60482	6.2972	5.47636	5.41757	7.37882	6.74473	7.52268	6.73965	7.68895	7.1428	5.37195	6.5795	7.14579	3.80505	6.0519	7.3075	7.40405	5.92654	7.21794	6.94155	4.26906	6.87824	5.81984
ENSG00000163536	10.2595	10.3628	14.137	9.14186	10.6415	9.49512	9.88436	10.3973	12.5505	11.0526	7.49956	9.50669	8.7767	8.78451	10.8849	11.0524	10.343	11.7643	8.31369	9.0965	8.9126	10.0388	9.31002	10.0895	12.724	9.79358	10.6602	9.99175	9.34839	9.93066	9.12332	9.23511	8.90702	10.8848	7.48738	10.3005	8.89538	11.2336	9.78548	10.5022	9.48012	10.6945	11.4446	11.6663	11.0029	8.74496
ENSG00000198833	17.4845	17.5968	17.3485	18.539	16.2624	18.1185	17.5593	18.7716	17.3679	17.5052	17.9196	17.9498	17.0751	17.6881	17.4661	18.0131	17.0411	17.7429	17.2078	18.5445	16.4144	17.8747	17.144	18.2203	17.3396	17.9188	17.7154	17.7521	17.1941	18.5079	16.7899	18.3102	17.4567	18.7848	17.4871	17.1554	17.6791	17.9945	17.7107	18.4559	16.8241	17.3539	17.4912	16.9987	16.9631	17.4415
ENSG00000267365	8.49609	9.53859	7.9698	10.4325	8.34926	10.2277	6.54708	10.2812	7.28253	9.57706	8.07763	9.85023	5.14822	10.4124	7.96117	8.85882	8.64761	9.42915	8.73153	10.4195	4.44548	9.83982	8.25793	10.6568	8.80226	9.52243	7.90877	9.3606	9.05358	8.85613	8.17429	9.44032	7.70126	9.95976	9.55433	9.91234	9.30765	10.9158	7.93821	9.36252	9.68631	7.74215	8.23249	8.29224	9.78983	8.54338
ENSG00000163508	6.55366	5.6791	5.46	7.83144	11.0421	8.5595	5.65391	6.75625	5.3712	8.0999	9.13501	8.70471	5.29054	7.04353	10.8849	8.85882	8.22154	7.65991	6.34484	8.70799	6.50585	8.13672	4.74789	8.10551	7.0124	8.71645	9.42134	7.0014	6.52845	7.08583	4.17967	6.83408	7.1428	7.54327	5.7056	8.01307	10.8444	5.48459	6.32617	4.94572	6.67448	9.50559	7.48284	5.846	7.34557	5.62636
ENSG00000258572	4.84786	4.71537	3.95424	8.08812	5.83124	5.36909	2.63498	5.17184	3.68188	5.42062	6.18124	5.54659	3.70469	3.72858	6.9941	5.69846	5.53847	5.06198	4.13488	9.04768	3.72417	5.33044	2.63498	5.82175	3.74566	4.81051	3.57219	5.35038	5.13419	6.46871	2.63498	6.13559	5.83718	6.24137	2.63498	5.98359	3.80505	6.64027	5.88691	6.04148	3.71934	6.00351	4.83125	5.3037	5.43784	5.27402
ENSG00000260992	6.65262	8.09092	6.8228	6.83914	5.08232	8.12573	7.94292	7.3251	9.12248	7.38872	5.63131	7.15001	6.20079	7.45927	5.66333	8.43378	6.8133	8.27285	7.87613	7.9193	7.27691	7.70097	8.10502	8.86967	6.80292	6.3218	5.41757	6.83371	6.52845	6.69738	7.24983	6.90753	5.41778	8.01199	8.31301	7.77414	6.61952	6.84715	6.1566	6.17106	7.53185	7.07641	7.31851	8.85833	7.46361	6.5943
ENSG00000167807	7.60659	6.83531	7.1501	6.62045	6.97644	4.41451	5.02883	6.22917	6.71657	6.48683	5.79016	5.4471	6.03232	7.46693	6.75752	6.3795	5.53847	5.42236	6.95255	6.9336	7.88772	6.28217	8.12568	6.39672	7.34017	6.39696	7.44076	7.52595	6.55161	5.90075	6.3799	7.16868	6.4814	6.81051	6.69359	7.51953	7.21023	7.2784	5.47566	7.22588	8.02519	6.74306	6.45934	6.85095	6.87824	6.41589
ENSG00000183578	11.3794	12.7182	9.39428	11.544	10.1868	12.0034	10.7976	11.2269	8.87719	12.8513	10.6122	11.1815	10.7794	11.8422	12.5121	13.7406	13.99	12.3447	7.79362	13.0041	9.30648	13.0463	11.8583	12.697	9.20104	11.3859	7.32322	11.9989	8.98324	12.1618	7.92333	11.9831	7.80571	11.382	6.11591	13.4096	7.70434	13.014	10.6804	12.7949	10.0597	12.2366	10.9402	12.2254	10.9548	12.2304
ENSG00000265222	3.81956	3.9018	3.72403	5.61722	4.5981	5.36909	4.86859	6.42726	2.63498	4.6312	8.8802	5.54659	3.93128	4.45227	4.0815	3.84103	4.24245	2.63498	4.13488	5.50444	3.9544	4.22611	4.74789	5.10585	3.9799	5.16196	3.93898	3.90107	3.99579	5.0879	4.17967	4.49829	3.79775	5.17272	5.0057	4.71316	5.34333	5.09978	5.42148	5.11438	3.71934	4.33039	4.43487	3.61094	5.29033	5.81984
ENSG00000124664	14.1574	15.1078	14.7902	16.5272	10.5397	15.0815	9.74873	14.5209	6.984	14.6973	15.4848	14.7379	8.08441	16.2773	9.72142	15.6973	12.1634	14.9787	13.4918	16.7132	14.758	16.8806	12.8154	17.3149	10.9666	17.2931	17.6672	15.0137	12.7733	16.6439	13.2588	16.9078	16.7648	16.0976	17.3821	14.2027	18.7559	16.347	14.184	16.8028	9.55727	16.4309	12.8837	12.3374	19.1863	16.8364
ENSG00000116299	19.4064	17.8309	18.3462	18.7143	12.0719	17.678	16.0755	17.3682	9.82461	17.3835	17.5236	16.1133	14.3256	18.7434	16.5447	16.8498	18.6665	17.0658	14.1722	19.5106	16.9755	19.0617	18.8581	18.9939	16.5707	20.4767	19.6322	17.3366	15.3678	17.3046	15.9711	18.9098	17.4191	16.5426	19.21	17.3379	22.7898	19.0124	17.7892	17.6845	17.2299	18.9698	15.5031	13.7266	19.6777	18.359
ENSG00000170469	7.7397	7.38048	8.32333	10.1897	8.94943	10.1656	7.6786	9.88463	9.14442	8.66746	10.1675	10.7032	8.85954	9.61211	8.47394	9.34815	10.3199	9.13463	9.43596	9.4849	8.77265	8.94036	9.35665	10.2316	8.38058	8.74891	8.81631	9.64186	8.94456	9.16829	8.59365	9.08533	8.48359	9.18842	10.0484	9.45427	8.53313	8.9494	9.45312	9.25353	9.10781	9.0566	8.66573	8.82114	8.36168	8.69714
ENSG00000184319	12.5768	13.0115	13.7159	12.1075	13.1412	12.2707	13.0016	12.2347	11.9957	13.1082	13.517	11.5673	12.8715	11.943	12.9521	13.8239	13.0121	13.7772	12.5582	12.117	13.0194	13.5184	12.7646	12.725	11.8955	12.2952	14.6406	12.6989	11.7925	12.6051	12.9896	11.9749	12.9575	13.2846	13.8025	12.271	12.146	12.3306	11.8593	11.3096	12.431	13.2322	13.149	15.3783	12.7795	12.5764
ENSG00000142233	3.81956	6.08777	3.95424	4.52178	8.51027	4.09134	4.95112	2.63498	3.38318	4.89127	5.51441	4.2946	3.93128	4.8514	5.05826	3.84103	6.17801	4.13843	4.90174	4.7812	3.9544	4.44561	3.99655	3.60116	6.20504	5.32813	2.63498	4.98177	4.27445	3.89524	4.78388	4.49829	3.59261	3.55309	2.63498	4.56426	4.05019	3.38205	4.88748	4.94572	4.64245	5.16647	4.21643	6.11783	4.1131	4.22929
ENSG00000139890	6.55366	6.08777	10.9075	5.12981	8.53978	5.49938	6.31186	5.17184	9.75642	6.42946	7.84742	5.88598	7.88056	6.68407	8.1683	6.86714	7.52749	5.54367	6.5097	5.87267	9.45885	5.33044	8.14606	5.48595	8.68174	5.73245	6.52502	5.52365	8.14441	5.60461	7.88134	6.41377	6.98164	5.83995	7.19704	5.78516	6.94506	6.0519	6.41081	5.63556	6.29906	5.48119	5.44593	6.51928	6.59409	5.4017
ENSG00000152082	15.3389	16.5072	17.1787	17.3289	18.0849	17.0415	16.4334	16.2319	15.7965	16.7994	15.9363	16.7494	16.8435	16.9957	16.0784	17.2344	17.0098	16.9838	16.2462	16.8556	17.7039	17.3142	16.7986	17.3967	16.7725	16.9551	18.0099	16.7995	16.7411	17.0261	17.1332	16.4638	16.5336	17.2634	17.6793	16.9356	17.5683	16.6423	16.9743	17.0758	15.9781	16.7548	16.3364	17.1542	17.8757	16.9477
ENSG00000196581	7.5134	7.58635	5.95181	6.77999	5.59836	7.49	5.06605	6.60119	5.62136	8.1479	8.85087	8.07131	3.93128	6.96987	8.49671	6.77897	8.72248	7.12342	5.196	6.58707	6.95883	5.83865	5.09267	6.60482	6.48113	7.21205	8.07058	8.83676	6.84174	6.30852	6.87449	9.26097	6.54887	8.16375	5.845	6.77303	2.63498	5.2404	8.7378	6.9525	5.92654	6.85411	8.41006	8.08027	5.83374	7.01776
ENSG00000143384	19.321	19.7276	20.1263	21.0989	18.873	19.876	20.2448	20.9733	19.2703	20.4612	19.7335	21.478	19.0012	21.255	19.8913	19.6389	18.6926	19.8472	19.8457	19.89	19.3449	18.9562	19.0023	19.5713	18.8591	18.9927	20.2034	19.5992	20.0858	20.7272	20.2159	20.4894	20.7757	19.7129	19.2014	20.165	20.4692	20.0161	20.1893	22.1248	18.9818	19.7794	19.3886	18.6248	19.7048	21.5304
ENSG00000162692	13.9488	14.5453	13.8951	14.4912	13.647	13.7193	14.362	14.8191	12.1563	14.6493	13.1932	13.7309	12.6106	13.3384	15.6113	16.243	13.954	15.3188	12.9735	15.5603	13.349	14.1532	12.9877	13.823	13.4687	15.0634	12.4757	14.4146	12.8144	14.9953	13.534	13.8235	12.5006	12.9335	12.2259	13.6965	8.9245	14.3899	13.9452	14.5809	14.5694	15.3513	15.9764	15.7161	15.0307	13.242
ENSG00000132429	4.84786	8.57915	5.46	3.34349	3.6716	11.4842	4.2156	9.61866	7.05073	7.90416	5.57409	6.44042	3.93128	4.23212	5.17949	6.70111	10.1017	7.31975	3.36645	4.39174	2.63498	6.50606	3.75971	3.97802	4.88183	5.16196	8.41283	8.27887	2.63498	5.72601	4.39405	3.7585	5.53503	11.3714	4.48957	6.63928	8.9245	5.09978	5.78423	11.2352	3.94867	7.27884	6.4892	10.0547	5.9531	7.01776
ENSG00000091583	5.91883	5.6791	9.82155	6.70774	5.59836	5.83002	5.72399	6.89616	6.14612	7.03969	4.46271	5.72652	7.64948	6.51649	3.89993	6.20944	5.05899	7.65991	5.69053	7.65928	5.18664	8.21094	5.65449	7.876	5.62485	8.39952	8.9609	6.73324	6.40667	6.46871	4.39405	7.36376	3.31822	6.93877	2.63498	6.77303	4.05019	5.73957	4.3327	7.03606	4.1362	5.16647	3.94625	4.848	3.48986	6.66586
ENSG00000240395	6.04632	6.03209	5.52071	6.86783	8.3231	5.81025	7.89878	6.17502	5.62136	5.77143	9.2428	4.95622	5.672	6.20293	4.49763	7.25233	6.04319	6.22162	5.64351	6.29843	5.06801	5.81477	6.17874	6.89591	7.13679	6.76593	6.7426	5.52365	7.33002	7.22242	6.30205	6.47962	5.66381	5.90475	6.08824	6.38416	6.26007	6.30767	6.64988	7.04952	5.96994	5.37143	5.5926	6.2922	6.76826	5.95751
ENSG00000269737	9.8441	8.34997	6.6597	6.64278	7.02371	6.35007	7.10093	4.78045	5.76625	6.7745	9.18287	5.63945	5.64609	8.04453	7.1747	6.23184	7.23835	5.90063	8.08568	7.4603	6.2469	5.52119	7.03612	5.43767	7.78205	6.4331	5.74917	6.31287	7.3166	6.01893	6.56442	7.99387	8.22409	5.11801	5.37659	7.58753	8.3966	6.94038	6.4777	6.7692	6.03945	5.48119	6.15802	6.20768	5.79489	6.35524
ENSG00000177169	15.733	15.9276	15.3146	15.8035	15.5875	15.3123	13.7312	14.7326	14.8197	15.25	15.3189	15.4255	15.613	15.762	15.4834	14.4086	15.4771	15.7224	15.6721	15.3608	14.6757	14.9842	16.4336	14.9121	15.8414	15.3948	14.5836	15.5058	14.8108	14.5175	15.5474	15.5382	15.3456	13.7054	15.5811	15.5916	16.7527	15.3926	15.2128	15.1454	15.5377	15.8649	15.6801	16.9978	16.0099	15.0572
ENSG00000162694	13.2777	13.7173	13.7031	11.821	12.338	12.2814	13.7194	12.7857	12.9859	13.9617	12.1175	12.2845	13.2249	11.7748	13.0267	13.728	13.2628	14.2431	13.7488	12.4232	12.9998	13.046	11.9517	12.1837	13.246	13.0398	14.1075	13.4657	13.1275	12.225	13.535	12.5144	11.707	13.3327	11.8429	12.7836	12.9129	12.4873	12.6134	12.469	13.0831	13.3794	13.5652	15.5053	13.9226	13.344
ENSG00000185630	15.6291	18.7864	15.3632	16.9149	13.5644	17.3267	16.5325	17.1895	15.2143	18.5019	14.9225	17.6634	15.9044	16.7659	15.3794	17.1945	16.229	18.8138	15.0779	15.8284	16.2117	16.982	15.3009	16.3357	16.53	16.5205	11.6339	17.5498	14.136	16.544	15.8195	16.1947	14.0032	15.5394	15.138	17.163	16.4453	17.4481	16.4679	17.5172	15.6962	18.5756	15.7873	20.4592	17.3248	17.7405
ENSG00000188186	16.5158	16.5829	17.2775	17.5452	18.1151	17.3679	16.0524	16.8352	16.0578	16.7625	15.1468	17.7715	16.5281	17.6769	16.2415	17.9813	16.7792	17.099	16.8234	16.8073	17.3091	18.4936	17.1688	18.6314	17.2878	17.7177	17.4648	16.8101	17.1947	17.2939	15.7497	17.1365	15.703	18.9516	16.9956	17.2452	16.005	16.3543	16.3837	17.0505	16.3259	16.5121	16.6818	16.1412	16.3399	16.8672
ENSG00000122068	16.3658	17.0315	15.6448	15.9538	16.3447	16.1801	17.3624	16.5014	16.7502	16.5673	16.1714	16.1157	16.5541	15.604	15.9269	17.4406	16.1266	16.9748	16.6564	16.004	16.3372	16.6768	16.8042	15.9759	15.5665	16.1122	16.3238	16.3681	16.0743	16.2697	16.3917	15.7689	16.3719	16.8145	16.1726	15.9613	15.91	16.0482	15.9162	16.3572	16.638	16.3565	16.2634	17.3879	16.3591	16.376
ENSG00000082293	4.84786	5.52501	3.41397	6.90521	3.37568	5.61849	5.91542	7.19584	3.68188	5.70796	4.1575	7.95169	3.93128	8.44025	8.05624	7.10316	3.31927	4.4406	3.65893	8.299	2.63498	5.95233	3.75971	6.23895	3.74566	6.41514	2.63498	6.08628	3.61437	5.83774	2.63498	6.0293	5.64315	5.37195	2.63498	7.46141	4.82376	8.1667	4.56357	7.77176	3.27072	7.00606	5.01307	4.59158	4.57948	7.17291
ENSG00000235961	7.63099	10.015	5.29546	6.64278	5.46554	7.29263	4.63615	6.9928	6.56801	9.6683	3.42225	7.83094	11.8334	6.00519	7.03831	8.57102	5.53847	10.1911	6.0904	7.07052	5.33026	8.01252	8.85485	6.23895	7.0124	7.34085	3.93898	9.55651	6.38101	7.41284	6.34927	7.68895	5.17781	7.61211	4.18069	8.46784	3.47336	8.30914	6.25159	7.59044	5.83552	8.97013	7.51212	11.2054	10.6693	7.35056
ENSG00000278107	3.81956	6.08777	4.44526	5.92361	5.08232	5.49938	5.13756	6.89616	4.61574	6.71183	4.91182	5.3399	3.39984	4.23212	4.41691	4.38745	4.46372	5.94496	4.34424	6.50644	4.84354	4.84369	4.74789	5.96368	5.88614	4.81051	4.52103	5.52365	3.99579	4.93141	4.39405	5.53145	3.79775	3.55309	4.18069	6.77303	6.69685	6.22742	4.88748	6.39942	4.34571	6.42068	5.31629	6.83232	4.97294	5.62636
ENSG00000168243	16.1817	11.6934	17.1966	12.1428	8.28488	11.7569	8.97678	9.57261	17.0281	12.4677	5.73918	10.4619	18.1275	11.6743	17.3213	11.9849	17.6477	12.8914	15.4341	11.7921	13.7856	11.5351	14.1875	11.2154	17.4381	12.567	10.6456	13.1313	17.4124	11.0323	17.7022	11.7988	7.43124	12.4461	5.7056	12.8548	10.0363	12.6721	17.7584	12.199	16.6787	12.1175	15.4848	12.7511	16.5941	11.578
ENSG00000182747	14.9625	6.44765	11.625	4.66826	9.60378	6.01389	8.19079	6.42726	6.92421	7.74938	5.38677	6.96788	15.6821	4.8514	10.5525	7.56462	10.4541	7.80989	7.37811	4.62871	9.82194	4.84369	7.69204	3.60116	10.3228	4.81051	3.57219	6.83371	11.0096	5.35525	14.8122	3.7585	12.4884	3.91319	3.9158	5.30715	8.98412	4.37756	8.35782	5.48268	12.877	7.52488	11.8176	7.96559	9.63205	5.51856
ENSG00000163534	5.77869	4.71537	2.63498	9.68249	7.51513	5.49938	4.78054	9.5304	2.63498	9.71084	5.57409	10.2098	3.39984	9.22676	13.4146	7.31628	4.92482	7.02446	5.69053	12.7971	2.63498	8.77289	5.09267	8.26325	6.72569	8.78066	3.93898	7.98412	5.51682	9.16829	3.38979	7.88316	8.45469	6.85996	4.18069	10.2755	5.49204	4.76471	8.01195	8.35705	5.48082	5.33281	7.48284	5.12686	3.67472	8.31848
ENSG00000233101	7.94174	12.4634	12.4932	8.91851	12.3415	10.6118	10.662	9.85073	15.9701	12.301	12.82	9.96936	7.76075	9.34568	8.49671	13.4009	5.18099	12.3554	13.811	9.02624	12.7925	12.222	12.8944	9.4848	9.56191	10.1297	10.7067	11.8544	8.40087	9.93066	9.48907	9.21602	11.1748	10.9393	6.11591	10.3288	12.7142	9.53731	10.1431	7.65345	8.78989	12.1955	8.94849	13.4053	9.20515	11.4114
ENSG00000186480	16.4647	18.3755	18.4945	15.4213	18.21	16.2947	18.2425	15.6125	18.1979	15.584	17.2675	16.7517	17.7018	15.6237	17.2337	17.7176	16.8853	15.2656	16.5152	15.3133	16.7893	14.9212	18.3608	14.9593	15.0956	14.3047	16.9113	14.9342	16.9991	16.2719	16.2104	15.8802	17.8423	14.9197	16.8059	15.5888	15.198	18.0634	19.3599	16.6224	16.6953	17.1606	16.8977	15.2951	17.7673	17.9542
ENSG00000183495	16.7476	17.2717	15.608	16.4764	15.4213	16.255	16.2776	15.9138	15.087	16.0703	17.3918	16.5606	17.103	16.7435	17.063	14.5526	16.9958	15.7724	16.9986	16.9563	16.8532	14.8703	16.9394	14.8548	16.9928	15.8167	14.3232	16.096	17.0182	15.7583	17.4112	16.2205	17.7853	14.1061	17.1715	16.5597	17.6032	16.929	17.1067	16.8096	17.1858	17.0413	16.7327	17.3296	16.5696	16.6997
ENSG00000143382	12.8246	15.428	11.3104	12.6916	13.238	13.7086	9.60056	12.1888	10.4866	15.059	13.1815	13.8925	12.5806	14.8297	15.0217	13.9032	12.4733	15.0954	11.1012	13.536	10.3973	12.8322	10.8639	13.3432	12.4006	14.914	9.42989	15.0585	11.4493	13.7639	11.6963	14.0611	12.2808	12.8129	10.7372	15.7745	10.6225	14.1145	12.3366	15.7852	11.5145	14.9899	12.5524	16.2174	12.4712	14.9809
ENSG00000221916	7.84078	7.58635	8.52579	7.83144	7.87049	8.01907	8.69947	7.55325	9.00264	7.38872	7.64346	7.88793	8.19857	8.87069	8.47394	7.37751	7.99054	6.6786	7.87613	7.74933	7.65493	8.55873	7.30465	8.97707	7.71054	7.57635	10.0613	8.03412	7.66242	6.90471	6.51014	8.22643	7.19274	8.30698	9.83793	8.65795	10.6431	9.27311	8.26287	7.03606	9.30245	7.74215	7.73333	5.50883	9.71213	8.19651
ENSG00000154556	13.3994	19.1694	14.2744	14.6181	13.2225	14.8399	16.2143	15.3409	15.6315	18.4586	15.0491	15.0145	14.3216	15.758	14.2429	18.8535	14.0943	18.7361	13.4697	14.852	14.6395	17.7408	13.9826	14.6699	9.61979	16.559	13.8841	17.7133	12.8716	15.5956	12.5942	14.6021	12.4308	14.6985	11.7358	16.7952	15.1607	15.835	13.0179	15.7277	13.3396	18.7482	13.8863	21.013	16.0224	18.1973
ENSG00000256229	11.2827	10.7483	12.4123	11.2089	12.6512	11.4139	16.2266	11.7012	12.2826	11.3395	10.2884	11.1692	11.4094	10.8016	12.2914	11.1944	12.1878	10.6378	11.5058	11.8876	11.1933	11.5468	13.0669	11.1407	14.1357	12.8111	6.0172	11.2561	12.0686	11.0042	11.9412	11.4079	12.0995	11.7296	14.007	10.1837	11.8785	11.2336	8.5433	12.1504	12.0548	11.2311	12.6549	10.6219	9.43082	11.6517
ENSG00000119522	15.7155	16.0886	15.5614	16.4418	15.5237	16.3091	15.1809	15.8465	16.7525	16.0101	16.2441	16.598	15.8078	16.663	15.5815	15.6419	15.7831	15.8438	16.1543	15.82	16.245	15.8989	16.5681	16.3082	16.3066	15.7858	15.7576	15.7716	15.9454	16.1777	16.6226	16.0784	15.872	15.2418	15.0052	16.0648	15.3995	16.0365	16.1662	16.1944	15.7359	16.228	15.3567	16.2868	14.744	15.8868
ENSG00000154451	13.4064	10.3116	11.4793	11.8152	15.7544	11.8486	11.2484	11.7753	8.539	11.5644	15.2951	11.2456	11.6717	10.1443	14.9826	15.8999	13.7819	11.3323	11.0861	12.1063	11.7615	13.001	10.6273	11.7718	13.0483	12.0786	11.4218	11.0838	11.7651	12.2863	12.0597	11.3021	14.258	11.2957	13.6308	11.4046	7.36007	11.1305	11.3042	12.4495	14.4353	15.1493	14.136	10.2228	12.9431	9.88214
ENSG00000155275	12.6913	12.5473	12.1753	12.2463	11.0056	11.811	12.0977	11.7154	11.9031	11.4363	12.9567	11.7847	11.937	12.3146	11.1386	11.6988	12.5648	11.8626	12.6928	12.3043	12.8947	11.9414	12.2498	11.8996	12	12.1871	13.2575	12.0818	11.5422	11.8877	12.2253	12.1643	12.8116	12.0512	12.8993	11.9409	12.6083	12.3034	11.7903	12.2793	12.774	12.5316	12.294	12.647	12.0608	11.8521
ENSG00000272498	4.59146	5.6791	4.68761	4.84068	4.5981	5.13096	6.64566	5.99895	3.90416	5.42062	7.19755	5.54659	3.93128	5.46948	4.41691	3.84103	5.84081	5.35747	5.196	5.25924	4.68784	3.95451	3.75971	4.57383	4.47858	4.5573	3.57219	5.15212	3.61437	4.75396	3.69094	5.78926	5.92501	4.48602	5.55079	5.88786	4.82376	5.2404	4.12451	5.11438	5.83552	4.97686	5.17312	5.50883	4.1131	5.81984
ENSG00000118849	13.629	13.8018	11.7472	14.9224	14.9357	15.0202	11.0181	15.333	10.3364	14.5091	15.1863	14.7519	10.2659	13.9641	15.0899	18.4376	12.4766	14.8435	14.7846	16.84	11.7753	15.5897	12.4987	16.0043	13.0289	16.4796	10.1223	14.9955	12.3622	16.7564	13.62	16.4979	14.4023	16.2695	17.7592	15.2282	15.9413	18.4287	13.869	15.2154	11.6846	16.4957	14.3766	11.663	14.8633	15.4761
ENSG00000177133	4.35795	9.52115	4.44526	5.92361	6.12124	7.24241	3.15733	5.47516	5.95893	7.38872	3.73535	7.32546	4.41537	8.10955	5.83249	6.86714	6.10469	7.65991	3.36645	8.26278	6.75017	6.95906	8.6526	8.10551	6.20504	8.3627	7.85052	7.8228	2.63498	7.26257	4.63125	7.04403	3.79775	5.9667	2.63498	9.08283	2.63498	8.97405	5.88691	8.64071	4.48168	8.40569	7.25928	9.85067	4.78071	6.90416
ENSG00000140043	12.9045	12.8974	12.7407	13.4437	10.6102	13.7257	12.4203	13.2917	13.0025	13.8959	11.8682	13.0021	14.0997	14.0306	13.4335	13.2301	13.1953	12.8702	13.3245	13.8774	13.5302	13.3788	12.8816	13.0551	12.964	13.7438	11.8279	12.9676	13.2642	13.6255	12.8752	13.9532	13.0822	13.5714	12.4436	13.2118	14.1422	13.1932	13.2024	13.2134	13.2193	12.9679	13.5018	12.7056	12.7374	13.9625
ENSG00000112619	7.12376	8.5401	7.751	7.57784	5.3493	7.833	6.10151	7.65506	6.85116	8.56071	6.95399	7.24041	7.64948	7.94387	7.77989	6.41902	6.33992	8.27285	6.34484	7.30258	7.03244	7.84197	6.23726	7.33185	6.48113	7.73612	3.93898	9.25016	5.85446	7.70846	6.87449	8.6811	6.41058	5.83995	4.48957	8.68357	3.80505	7.72463	5.98263	8.31871	6.07957	8.88141	8.33837	11.1707	7.05554	8.00159
ENSG00000092009	5.65555	9.91176	6.33265	9.90005	4.5981	8.41494	6.16961	8.50594	3.38318	10.8752	3.42225	9.75139	3.39984	10.3465	9.47201	12.1248	4.46372	10.1681	3.65893	8.08059	3.72417	11.2447	4.27534	9.56685	4.72421	12.2546	4.77079	11.8131	3.99579	9.94674	2.63498	7.84013	5.41778	9.93888	2.63498	9.23499	2.63498	9.23078	6.1566	10.816	5.03102	11.2406	5.44593	9.27759	3.48986	10.6434
ENSG00000159792	16.0945	16.3055	15.3284	17.1027	14.4781	16.7739	15.0895	16.1501	16.1313	16.4162	14.6414	16.29	16.5193	17.0508	15.1545	15.7143	15.061	16.1854	15.7448	16.3033	15.8282	16.6871	15.4159	16.6369	15.6197	16.3859	15.7229	16.7055	15.5905	16.4465	16.2476	16.6077	15.9467	16.6627	13.2759	15.9968	14.8996	16.4826	15.239	16.1172	16.2672	15.8883	15.745	16.7654	15.6474	15.6872
ENSG00000243649	18.9615	15.0439	19.1773	15.5927	14.7675	15.6114	15.5994	16.2068	18.4399	14.5492	17.872	14.6503	15.9454	14.7013	16.9355	18.9224	19.6403	15.8884	17.652	15.1282	16.9141	15.8806	17.9179	16.036	18.1245	16.3987	17.1318	14.3231	18.514	17.8612	18.521	14.2237	15.8264	14.6744	14.0886	17.3955	16.4982	18.6227	17.2385	14.682	16.8737	18.7098	18.2838	14.3917	15.585	14.4174
ENSG00000246145	4.84786	5.15337	4.84329	5.72694	2.63498	4.29573	7.61937	4.43387	2.63498	5.25101	6.57664	5.3399	3.70469	4.45227	3.67832	3.84103	3.31927	4.78812	3.87685	5.97672	3.9544	3.95451	4.27534	6.23895	3.9799	4.81051	3.93898	4.16337	3.99579	5.0879	3.38979	6.23448	4.24017	3.91319	5.0057	5.42235	4.82376	5.2404	3.36107	5.63556	3.94867	4.33039	4.43487	2.63498	3.33631	5.27402
ENSG00000153107	16.3957	15.8946	15.9057	15.7218	16.0825	15.9903	18.1612	15.3989	16.979	15.1865	16.6801	15.3582	17.5939	15.4946	16.7764	14.8856	17.2542	15.626	16.3616	16.1804	17.1072	14.9313	15.2874	14.9661	16.7611	15.5284	16.1498	15.3395	17.3405	15.9965	17.4317	15.3856	17.0741	15.275	16.0386	15.6538	15.7187	16.0989	16.951	16.035	16.8508	15.7139	16.4996	15.7385	16.0966	16.421
ENSG00000275582	4.35795	4.98297	5.46	3.62738	6.30161	2.63498	9.43711	5.99895	3.90416	3.84581	7.99421	5.54659	3.93128	3.95963	6.20036	4.09267	5.05899	2.63498	4.7259	4.7812	4.68784	3.41414	4.74789	4.8286	6.94591	4.81051	4.77079	5.35038	6.9326	3.37772	5.2623	5.78926	4.92185	4.17762	4.48957	4.71316	4.98648	4.76471	5.3063	4.68114	6.4286	4.97686	4.67618	4.59158	3.33631	5.16257
ENSG00000129596	8.13036	9.57042	7.93191	6.19051	6.89742	8.05689	6.4412	6.89616	5.85515	9.48433	5.0893	7.69914	6.38282	7.51206	11.3882	11.5965	6.17801	10.7502	5.32219	7.3571	4.44548	8.80319	5.25605	7.40762	6.2972	9.81247	3.57219	10.2746	3.61437	7.83624	4.39405	6.23448	4.04156	8.2152	4.73628	9.23499	4.33798	9.73481	7.14472	8.31871	5.7549	11.5079	7.14236	10.9992	9.17557	9.60485
ENSG00000141505	8.45571	6.2181	14.3913	7.18885	8.7138	6.35007	9.56179	6.42726	12.1455	7.11419	6.42497	6.44042	9.71552	6.60273	10.5784	8.3498	7.24515	8.27285	11.6175	7.00369	9.76921	7.44813	11.9668	8.50067	9.10298	8.65307	5.5932	7.8228	12.4194	8.15028	8.19585	6.90753	6.86319	7.8505	8.40489	7.14579	7.53829	6.97994	9.03604	5.77336	8.48877	8.29226	8.57161	7.025	9.49434	6.23911
ENSG00000064419	17.111	16.8495	16.1825	16.7728	17.0903	16.9109	18.1745	16.6244	16.4851	16.4496	16.8214	16.7993	17.7928	16.5323	16.7957	15.6961	17.3321	16.4378	17.2212	16.6854	17.4776	16.1481	16.7132	15.9368	16.9776	16.1393	16.35	16.4535	17.0709	16.4238	18.239	16.2024	17.0089	15.7704	17.1001	16.3609	16.3649	16.3685	17.1981	16.8177	16.7853	16.5843	16.7911	16.8074	17.1232	16.8478
ENSG00000165282	15.8834	15.4063	16.0656	16.4723	15.1747	16.6279	15.3215	15.9237	15.7898	15.265	15.3591	16.1554	15.9265	16.5401	16.0748	14.9539	16.5812	15.67	16.0996	16.0433	15.8546	15.2447	16.9887	15.6426	15.4531	15.4199	16.7291	16.0062	15.9326	16.3029	15.8364	16.1582	16.9358	15.365	15.2596	15.5957	16.4581	16.4847	16.6347	16.3301	16.9111	15.7812	15.3308	14.1951	17.7536	16.2511
ENSG00000170906	14.8751	15.1597	15.7157	16.1505	16.9826	16.2999	15.5119	15.7792	16.1853	15.7206	14.6076	15.9987	14.8094	15.6684	15.0494	16.3966	15.8261	15.8551	15.811	15.4508	15.0907	16.1071	15.683	16.744	14.9923	15.757	17.1923	15.7696	15.9756	15.8817	15.4175	15.3354	14.3846	16.9898	15.684	16.1842	15.075	15.0414	15.4546	15.5446	15.142	15.499	15.0661	15.5477	15.0124	15.5623
ENSG00000270344	9.18891	9.00547	9.32918	8.55204	9.39367	8.41494	12.4349	9.61866	8.75982	8.27761	13.3093	8.33986	9.1388	8.18576	8.95698	8.13635	9.5656	8.2113	10.5256	9.04768	9.95873	8.09813	9.55436	8.62742	9.91532	8.5463	10.6913	8.27887	9.66617	7.41995	10.6294	9.67342	9.95182	8.16375	13.4628	8.52881	11.3136	9.14005	8.15715	8.39966	10.9703	8.58897	9.73185	8.37158	8.90407	9.09965
ENSG00000259417	5.20319	9.82509	4.2258	9.078	4.15262	8.28997	3.97578	8.3569	5.3712	10.0317	5.16996	8.23398	10.3473	8.2224	4.83815	7.8927	3.79947	9.17203	4.57632	8.11711	3.72417	7.70097	3.75971	6.49297	4.47858	6.3218	2.63498	9.86732	4.27445	8.63573	4.17967	8.95029	5.53503	8.56667	4.18069	7.35899	4.82376	7.72463	4.3327	9.27942	3.94867	9.48423	4.83125	10.6711	3.82749	8.31848
ENSG00000182487	8.30724	8.18887	7.77566	10.7866	10.667	9.80503	5.93517	9.26682	5.40133	10.1542	7.871	10.5557	6.51621	10.1092	11.9488	10.7863	9.93334	9.78641	7.55768	12.4923	7.08279	10.236	7.05782	10.1911	8.68852	9.68594	7.58048	10.9377	7.17507	9.8448	7.44995	11.7176	8.15029	9.63334	8.82637	9.81267	5.03658	9.23691	6.66142	8.62284	8.90321	11.9293	9.69247	7.76463	8.66955	8.42801
ENSG00000148200	13.4383	11.1208	12.0524	12.4952	13.8175	12.6488	13.5598	12.8477	12.8776	11.7108	10.8427	13.531	12.8723	12.7869	12.7793	9.76337	14.491	11.205	11.631	11.8051	12.3396	11.4563	13.8879	12.0444	12.9172	11.5697	11.585	12.0746	13.2097	10.2754	13.2031	12.8208	12.7044	10.269	11.9554	12.6312	11.5395	12.2317	12.3421	11.9906	13.0184	11.2111	12.0093	11.8019	7.97186	10.3053
ENSG00000261229	5.44777	6.69971	6.71189	6.98591	7.65361	6.36362	8.54901	7.37371	7.64505	5.74005	7.60178	6.06289	6.77443	6.51649	5.75811	6.43838	5.97889	5.21771	6.23907	6.71213	7.04265	7.07309	6.29347	6.78646	7.00153	6.35987	7.26064	6.05872	5.60916	6.01893	6.65471	5.32855	6.8184	6.45008	7.49786	5.78516	5.658	7.20523	6.73971	7.16535	6.58484	5.76649	4.83125	5.80803	6.65991	7.51419
ENSG00000196656	17.5367	17.3925	17.9798	17.1121	17.6305	17.4783	16.2674	17.6546	17.9562	16.1857	17.6667	18.2135	18.6757	18.7275	17.9156	19.4572	19.1125	18.9494	18.8302	18.5699	18.1012	19.6227	19.4786	19.6517	17.5469	16.7562	18.8738	16.3017	19.2822	19.0512	17.4049	16.8243	17.5575	19.7728	17.1704	16.8926	16.4451	16.1465	19.4104	18.7271	16.7664	16.4523	17.0157	16.2276	18.9225	18.4627
ENSG00000157184	15.7093	16.5942	16.1428	18.0309	15.1241	18.454	14.789	18.1247	14.0359	17.2153	16.3361	18.44	15.1284	17.9683	14.8146	16.2587	15.1451	17.2108	16.4769	17.6196	16.4467	17.6801	15.2478	17.5693	15.7452	17.6193	16.4543	17.9849	15.0391	17.1247	14.6041	17.4451	16.6101	18.0434	14.9673	17.1006	15.75	17.3966	14.7706	17.1162	15.1984	16.1723	15.3054	15.39	15.246	17.0916
ENSG00000197815	5.91883	7.82449	6.15496	6.09621	6.46169	5.83002	7.02071	6.89616	6.14612	6.42946	9.30034	7.76147	5.672	7.51206	6.05952	5.41161	5.92868	6.25708	6.34484	7.50925	5.02604	5.0262	4.90674	5.96368	7.21412	6.3218	4.2079	7.58467	5.85446	4.15652	6.25322	7.53552	7.7686	5.17272	4.73628	7.20213	6.52085	7.58429	5.3063	6.68532	5.26254	7.58235	5.31629	8.08027	6.17286	7.07136
ENSG00000155252	15.3267	15.2625	13.6467	15.1494	14.9536	14.8702	14.6987	14.5019	15.9087	14.6425	14.5559	14.6902	14.9236	14.7601	15.3638	14.8814	15.0408	15.1458	15.1849	14.8125	14.9987	14.52	15.172	14.5694	13.9042	14.4227	14.4338	14.8516	14.8483	15.301	15.1321	14.583	14.1927	14.5175	15.5313	14.7533	14.0261	14.9847	15.5724	15.1253	15.2367	15.621	15.6674	15.2471	15.0973	14.6367
ENSG00000134986	15.6118	15.4989	15.835	14.1527	14.1452	14.5458	14.9043	14.6676	15.0782	15.6447	13.9312	13.6916	15.0748	14.3014	14.9665	15.233	14.6399	15.979	15.7999	14.439	14.7042	15.1784	14.9941	14.5822	14.1352	14.3965	14.8803	15.6727	13.2774	13.8108	14.9296	14.2908	12.71	14.8228	15.6835	14.6161	14.1432	14.6265	15.0776	14.4893	15.2015	15.1814	16.5595	17.5774	17.3627	14.7411
ENSG00000198517	16.0903	16.6458	16.4593	16.9449	14.9232	16.0473	15.516	15.9487	16.2145	16.1401	15.8073	16.9569	16.1733	17.2383	16.0031	14.7927	16.0807	15.2686	16.7336	15.5632	16.3707	15.0168	16.1236	15.6812	16.4162	15.2774	15.4896	16.038	16.6846	16.2586	16.9036	16.6022	16.9384	14.9649	16.7002	16.2784	16.5164	15.8629	16.948	17.355	16.8834	15.7312	15.8195	15.5437	15.9776	16.3632
ENSG00000100802	12.508	12.3739	11.7611	13.1172	12.6886	12.968	12.4701	13.0158	12.6893	12.8608	12.0687	12.6003	12.5926	12.9231	12.3847	12.1315	13.2847	13.0955	12.3109	12.9222	12.5111	13.3877	13.1768	13.1205	13.0598	13.1814	12.2309	12.9538	12.0934	12.7459	12.5986	13.0441	12.9978	12.7563	13.509	12.8807	13.9303	13.2444	12.6134	12.4574	12.4488	13.1134	12.8104	13.4562	12.9784	12.2167
ENSG00000115556	9.46913	14.131	7.78176	8.87924	7.20682	9.36389	8.49735	10.278	8.90574	13.8406	10.6921	10.0835	9.41671	11.3938	9.51947	11.6665	9.60702	13.7462	8.2181	9.50742	8.86744	12.6087	7.63549	8.42983	8.47379	11.0982	8.69867	12.9351	8.37525	10.1269	8.55746	9.71821	8.98791	8.74788	8.56778	12.1168	8.28124	9.85776	8.80155	9.9546	8.94509	13.5349	9.32118	16.6529	9.56448	13.4135
ENSG00000054523	16.5859	17.8696	15.4695	16.9602	15.3447	18.2738	17.507	17.5845	15.3287	17.1677	17.5488	18.2551	16.4613	17.0206	15.4902	15.6704	16.1183	17.101	17.0034	16.795	16.332	15.5208	16.2892	15.4105	16.6832	16.0933	16.4644	17.3461	16.0858	16.1398	16.5646	16.404	17.3813	16.2127	16.1161	17.0889	16.8593	17.3627	16.8841	17.4035	16.3562	17.2328	15.879	18.3166	15.6324	17.0235
ENSG00000026297	17.9525	16.6353	18.3956	18.0983	16.766	17.2916	17.2138	17.334	17.6328	16.5572	15.8576	17.0133	17.5284	17.0136	16.4621	16.4896	17.1062	16.5739	17.1899	17.5372	16.1266	17.646	18.6345	17.9239	17.9912	17.9405	16.6969	17.1649	17.229	16.7566	16.6332	17.6212	15.4284	16.9684	16.4394	16.7328	18.2613	16.7732	17.8247	17.7122	17.3713	17.2774	17.0035	15.0179	16.3021	16.6155
ENSG00000138326	21.0933	21.1635	22.0044	21.5135	22.837	21.6801	22.2793	22.0101	22.9075	22.0346	22.3014	21.2819	21.0722	21.36	21.994	22.9625	22.6734	22.2826	21.8993	21.8403	21.34	22.2236	21.6273	22.3594	21.6986	22.1334	22.8393	21.5153	21.6394	21.7956	22.8626	21.1263	21.3391	22.502	22.7612	21.643	23.0627	21.5094	22.7801	21.8611	22.0774	21.8121	22.3491	21.9753	23.5696	21.8208
ENSG00000213445	15.1356	14.8177	14.721	15.5104	15.3879	14.9054	12.995	14.3793	15.0359	15.0427	14.1021	14.5149	14.5605	15.0298	15.9555	14.3163	14.9887	14.7364	14.8433	15.9815	14.2602	15.3001	14.6127	15.2296	14.5913	15.2385	14.0622	15.4181	14.9631	15.2213	13.9395	15.0041	14.1601	14.5454	15.1258	15.2892	15.2113	15.2273	14.9215	14.8171	14.977	15.4654	15.4418	15.5053	14.7281	14.0435
ENSG00000116688	17.6693	19.4335	16.7156	18.6665	17.417	18.9421	17.0097	18.567	17.2483	18.7627	17.2831	18.8223	17.368	18.7264	16.6942	18.2721	17.9888	18.9767	18.7472	18.5347	17.6536	18.2166	17.4237	17.8053	17.4586	18.0708	17.3828	18.5872	17.5302	18.6228	17.4481	18.1103	18.7093	18.3506	18.0377	18.6879	17.2651	18.196	17.5999	19.1304	17.5789	18.964	17.3618	20.354	17.0988	18.8584
ENSG00000183145	6.73017	3.54467	8.93974	4.99306	3.37568	3.62792	4.35134	3.94548	10.1031	3.84581	4.1575	5.3399	11.6369	4.69531	8.13964	4.88339	8.12546	4.13843	6.34484	2.63498	9.56165	4.44561	7.1816	4.25365	8.99776	5.32813	3.57219	4.98177	9.83777	3.67438	4.96304	4.74584	2.63498	4.73238	3.55502	3.86852	6.94506	3.68032	4.88748	3.87897	11.0375	4.33039	9.54285	2.63498	8.41646	6.08295
ENSG00000076067	16.0072	15.9605	14.7533	15.6526	15.6714	15.1581	16.1602	15.65	17.0079	15.913	17.8048	16.281	14.9956	16.1476	15.8743	15.065	15.3875	15.8634	15.6751	15.9623	15.7618	15.2369	15.4255	15.2189	16.3024	15.7994	14.508	15.5671	15.0179	15.2355	15.664	15.6692	15.0001	13.674	14.2981	15.5603	16.5089	15.8293	15.6932	15.5293	16.0468	16.1281	16.1159	16.8668	15.3689	15.2201
ENSG00000106633	4.35795	6.33749	5.02577	4.52178	5.71963	6.19189	3.97578	3.94548	4.61574	6.32841	4.1575	5.3399	3.93128	6.16553	5.17949	6.41902	5.18099	6.25708	3.87685	6.73588	4.44548	6.89281	5.09267	5.82175	4.88183	7.27293	5.04317	6.73324	5.13419	6.128	6.51014	6.23448	3.31822	6.24137	3.55502	6.15758	3.47336	6.0519	3.86804	5.48268	5.57828	6.9321	6.2307	5.846	5.51212	4.59137
ENSG00000185565	13.7922	15.9427	12.5107	10.6402	12.5161	11.4703	13.5972	12.5071	11.2045	16.0165	12.9525	12.2282	14.5303	11.6817	13.9564	15.116	12.941	16.346	14.3204	12.6813	12.5591	13.069	11.6393	10.8988	11.5385	12.4166	9.02622	15.1575	11.3866	12.1239	14.015	11.1519	10.9894	12.0961	7.73773	13.694	8.00034	12.7508	11.9512	11.6735	13.5061	15.8349	15.1553	17.549	15.5877	14.5294
ENSG00000163682	19.7233	19.8405	21.3188	20.2701	21.7723	20.5816	20.4797	21.3904	20.9519	20.9093	20.5303	20.0959	19.9222	20.9211	18.9685	22.306	19.155	22.1656	21.3335	21.1046	19.9895	21.5809	22.3844	22.4066	23.474	22.9319	23.2987	20.409	22.3401	22.1821	21.2969	21.8899	21.1599	24.3771	21.8171	21.0486	22.3307	20.7054	20.4887	20.4259	19.74	19.9589	21.4556	21.8865	22.7389	21.6539
ENSG00000174946	7.32676	7.24115	6.42952	9.20488	10.8009	8.25787	5.72399	9.48693	5.85515	9.87841	9.2652	10.3882	5.90773	9.08228	9.443	9.32246	8.34359	7.73685	6.2701	10.051	6.67327	9.6192	6.67773	9.36969	6.1065	8.84547	6.62804	9.73545	7.85093	8.80275	7.00754	10.0008	10.292	10.49	7.6745	9.01268	7.53829	8.2047	7.46032	9.01753	6.4286	8.72266	9.07638	6.83232	8.34184	9.43745
ENSG00000279753	10.6449	9.00905	10.0008	10.1878	8.62177	8.06928	10.0858	9.67301	12.4774	10.8981	11.2501	10.3087	10.9592	10.2322	4.45793	5.59768	9.822	8.43548	11.6881	7.74933	9.33371	8.13672	9.81504	9.51932	10.1433	9.23735	10.0034	10.2582	10.1007	7.89357	10.3067	2.63498	8.00233	7.34949	12.5914	10.3152	11.4059	7.64085	11.7636	9.8121	9.89481	10.3124	11.4413	7.25197	10.2029	8.38338
ENSG00000011198	12.7458	13.7987	13.5254	15.0326	12.7418	15.8233	13.0149	15.7899	12.0104	14.2974	13.1351	15.9322	12.1042	13.8445	12.7179	13.9535	11.8562	14.3067	12.6683	13.5326	13.229	13.7164	13.3226	14.2092	12.372	13.2199	14.1298	14.9919	12.7495	14.4757	12.4324	14.1682	13.3859	16.3252	13.6978	13.7479	13.3331	14.1217	12.1657	14.5235	12.7708	13.2486	12.492	12.9386	13.3461	13.9718
ENSG00000167916	5.77869	13.1951	2.63498	4.66826	2.63498	6.64423	2.63498	8.12123	2.63498	12.3056	3.42225	11.4255	3.39984	10.2478	2.63498	10.4083	2.63498	11.0692	2.63498	9.02384	2.63498	9.3949	2.63498	5.28178	2.63498	11.2047	2.63498	13.3156	2.63498	7.03106	3.69094	8.14292	7.19274	11.6755	2.63498	12.7829	2.63498	12.1789	2.63498	14.8746	2.63498	11.383	2.63498	10.5197	2.63498	11.3685
ENSG00000111846	9.77102	13.779	8.25046	14.7766	8.18051	15.2609	8.59582	15.7185	7.68156	14.3843	8.05722	15.3093	8.19857	14.3624	9.03215	13.796	6.74769	14.5979	9.51207	13.3245	6.95883	13.8094	8.55695	13.2994	8.80226	13.0948	6.72413	14.5116	8.40087	14.1338	6.51014	13.5746	10.5957	15.4785	7.6745	14.1813	5.34333	14.4644	9.33603	15.6615	8.3329	12.6794	11.0688	13.8706	8.73818	13.1852
ENSG00000197976	15.1632	15.2274	15.9886	15.755	15.5206	14.8893	16.0527	15.2326	16.1168	14.6043	15.2183	15.5212	15.2744	15.9289	16.1841	14.3859	14.8201	14.3619	16.3684	15.2744	17.0237	14.6896	15.9911	14.7091	16.6751	15.1324	15.5748	15.154	16.3899	15.1878	16.2283	16.261	15.2551	14.8906	14.2972	15.5309	16.7936	15.4767	16.0203	15.8531	16.6713	15.5552	15.3579	14.9546	15.2433	15.818
ENSG00000136490	13.1537	11.5546	12.5187	14.4696	14.4408	12.7596	10.2012	12.5884	11.1173	14.3338	11.6933	13.0728	11.6029	13.6798	15.3348	14.0351	13.5458	13.1559	11.3878	16.3969	11.8156	14.1347	12.6483	13.8027	13.249	13.3684	11.9343	13.685	12.3821	14.3939	11.9287	12.713	12.7355	12.7555	12.0566	13.4038	11.4868	12.1623	13.2525	12.8999	12.7584	14.2644	14.1552	11.7241	12.6697	11.8962
ENSG00000184209	12.7787	13.4602	13.2433	13.9215	12.6027	13.8543	12.5946	13.8007	12.8093	13.9809	13.4548	13.9488	13.2454	13.695	13.2616	13.9528	13.4928	13.8109	13.7371	13.7106	13.048	13.6152	13.9059	13.5813	13.1478	13.2341	13.6882	13.5996	13.5974	14.0844	13.4243	13.3212	12.8632	13.9714	15.5709	13.8939	13.9279	13.4665	13.3483	13.9504	13.1552	14.0011	13.849	14.1883	13.4335	13.5603
ENSG00000136485	18.6152	18.1487	17.7319	18.5292	17.9795	18.4964	18.1962	18.4114	18.6173	17.8423	18.1647	18.5019	18.7264	18.4475	18.4585	17.3175	18.9499	17.9679	18.6856	18.7542	18.9622	17.7088	17.9683	17.6584	17.5499	18.2299	17.5099	18.2688	18.3449	17.9118	19.0919	18.111	18.5123	17.1373	18.3113	18.0836	18.3626	18.574	17.8195	18.299	18.8139	18.188	18.3041	18.0877	18.3551	18.596
ENSG00000280195	9.43261	7.04555	9.60833	8.80968	10.4877	8.02332	9.42507	8.62104	7.47517	6.48683	9.66965	8.27727	8.38758	8.52702	8.85317	7.15073	9.34169	7.25142	9.07051	7.62797	10.0837	7.86515	9.82296	8.12058	10.0385	8.01066	8.72668	8.30818	9.46227	7.16425	10.1388	9.40071	9.37324	7.37235	8.5017	7.98585	9.77548	8.66452	9.60821	8.52039	9.84952	7.79866	8.2148	6.34587	8.38933	7.31293
ENSG00000155366	19.5215	20.2427	20.3921	20.6883	19.4827	20.8016	18.7585	20.5207	18.2641	20.2391	19.44	21.56	18.889	20.3135	18.268	21.3558	17.7927	20.3677	20.3154	20.3389	19.8206	21.1319	19.8228	21.5146	19.8573	20.4133	20.3009	20.3014	19.9462	21.2314	18.2929	20.6167	19.1833	21.5705	18.2954	19.8861	18.71	19.5326	18.9495	19.5574	18.5248	19.562	18.967	19.7033	18.566	19.954
ENSG00000064309	11.5558	16.4317	9.8392	9.03661	11.8544	11.2942	12.6118	11.7629	10.8809	15.1789	11.9395	11.7351	13.054	11.6131	12.6522	13.2958	10.8488	15.1351	11.5207	10.4475	10.7986	11.8748	11.5604	9.50216	12.5863	11.6818	11.0363	13.9856	10.2509	12.2996	8.00868	9.63799	11.3816	9.26058	14.3015	13.4237	10.8927	11.478	10.0717	10.693	9.68416	15.9553	10.0349	17.3272	12.0067	14.4419
ENSG00000013306	18.6682	17.6911	18.9834	18.5959	19.4353	18.866	17.8202	18.0491	18.4653	17.8518	18.173	18.4442	18.9956	18.2669	18.0792	18.5589	19.4124	17.878	18.7967	18.1708	19.4556	18.3401	19.4327	18.6085	18.7017	17.9789	20.28	18.5512	19.8833	18.7771	18.8701	17.8706	19.0246	19.4446	18.5308	18.7813	18.4137	18.136	18.5919	18.4738	18.7063	17.7187	19.049	16.898	17.8402	18.4099
ENSG00000120742	18.2071	18.3049	18.7546	18.9744	19.8476	18.6336	19.2022	19.0438	19.5556	18.3533	18.4555	18.3348	18.7939	18.1904	18.0227	19.6542	17.9928	18.3297	19.2315	18.6835	18.7469	19.2	18.7842	19.1176	18.3141	19.0755	20.8774	18.3894	18.9142	19.0762	18.826	18.6433	18.5362	19.7707	18.296	17.8603	19.6176	18.4353	18.7014	18.9572	18.603	18.4182	18.7371	17.3471	19.7866	18.9005
ENSG00000101290	16.8557	17.2853	16.2383	16.2834	16.2294	16.775	18.6285	16.5328	15.2194	16.9861	16.5999	16.4527	15.6279	16.408	16.9626	16.1414	15.124	16.9919	16.4668	16.1682	16.106	16.0038	15.4888	15.992	15.9464	16.2755	15.8216	16.7728	15.3196	16.2674	17.7857	16.2509	16.2753	15.8335	15.8197	16.4874	15.6544	16.3251	16.3326	15.978	17.4382	16.8201	15.6686	18.2904	16.1471	16.3102
ENSG00000137507	17.2706	15.8719	15.1685	14.2504	15.5865	14.4895	13.7907	14.14	14.8822	15.0957	12.6757	14.4887	15.5744	14.3803	17.5527	14.1846	16.4969	15.6022	16.5758	14.4381	15.1498	13.5818	14.7933	13.7732	16.6316	14.5182	13.5179	15.3357	16.3016	15.9407	16.3084	14.0043	13.9068	13.8965	16.0852	15.5061	13.4562	17.458	17.1476	16.8553	16.6718	16.6387	17.8634	16.011	17.2233	14.7457
ENSG00000172795	14.1451	14.0119	14.1259	14.8917	14.3703	14.7667	16.1789	15.2657	14.5478	14.8554	15.6798	14.7866	14.7937	14.3097	14.7218	14.0198	14.1261	14.5721	14.3645	15.0053	13.3811	14.1265	14.0756	14.5323	14.8269	14.3906	14.0137	14.6778	14.1421	14.3635	14.2265	14.5759	14.1103	13.8162	15.8397	14.5147	12.8908	14.7848	14.5698	14.2767	14.7105	14.696	14.3549	13.9623	14.3991	14.371
ENSG00000103966	17.1573	17.6765	17.6829	18.3347	16.4486	18.1419	16.2427	18.0585	17.6629	17.2342	17.2233	19.0042	17.1955	17.8807	16.5088	16.9254	16.3864	17.1583	16.8431	17.4863	18.5372	17.1844	17.073	17.5313	17.114	16.741	17.5036	17.6211	17.4118	17.9855	17.9881	17.7689	16.747	18.303	16.0043	17.6474	16.3075	17.5337	17.1753	18.5041	17.2129	17.1811	17.1727	15.7404	15.8345	17.5642
ENSG00000131115	12.5697	12.9294	12.3168	12.6676	14.5525	12.4679	15.2639	12.4339	13.2605	12.6409	12.5554	12.3108	13.1198	12.1636	13.0203	12.2575	12.9914	12.852	12.5431	12.6923	12.5397	12.9181	13.0218	12.9321	13.0282	13.2172	11.0939	12.2641	12.6286	11.9635	12.5394	12.4135	12.6214	11.9261	13.9847	12.2409	12.8365	11.7856	12.5809	12.1705	12.7222	12.5736	12.1327	13.3626	13.2884	12.1443
ENSG00000147677	19.543	18.5933	19.4741	18.8329	19.6346	18.7584	18.8767	18.764	20.6793	18.994	18.9808	18.3725	20.6422	18.3628	18.8741	19.0145	19.9786	19.0503	19.7099	18.6401	18.9623	19.2577	20.8348	19.2786	20.8517	19.3085	20.3501	18.8459	19.7534	18.6533	19.7158	18.4614	19.2463	19.1064	19.7662	18.6354	19.5421	18.7348	20.1543	18.8795	19.5882	18.6577	19.7753	18.9632	18.871	18.6116
ENSG00000004838	4.84786	5.6791	5.32998	4.66826	6.69021	5.2552	5.06605	5.47516	5.48798	5.25101	9.21084	5.16157	5.7948	6.25726	6.26587	5.69846	4.77552	5.94496	4.34424	6.16435	5.71479	6.24711	6.5143	6.49297	5.88614	5.47636	7.16819	5.52365	4.59779	5.22811	4.63125	6.58803	7.33926	6.93877	7.19704	6.77303	7.01909	5.95527	5.3063	5.77336	5.66938	5.87677	5.69975	6.73538	9.04466	5.51856
ENSG00000138778	11.8791	10.8575	12.6915	11.8094	12.4525	12.0461	15.5146	11.8746	12.1727	12.1905	14.0996	11.2582	14.0177	12.4693	14.2859	10.6129	14.0194	11.0379	13.2394	12.5988	14.4876	11.4563	13.9775	11.646	13.4843	11.1443	13.5179	11.4355	14.8894	12.7701	15.1354	11.9302	15.6348	12.282	14.2918	12.967	13.3903	13.0176	13.7923	11.3711	13.5373	12.9685	12.9702	9.75284	13.0132	12.5545
ENSG00000055332	17.5744	16.7176	15.801	15.8913	16.53	16.3106	18.3603	16.555	16.9362	16.4394	18.2132	16.7888	17.3492	15.8471	16.6248	16.405	17.253	16.0772	17.2551	15.8	18.066	15.7388	16.6236	15.871	17.3099	15.9928	16.1936	16.032	16.7507	16.6082	17.0762	15.8661	16.7346	15.5832	15.8234	16.9092	16.437	16.3857	17.0973	16.6808	16.9991	16.811	17.0271	16.7908	16.4972	16.5778
ENSG00000188306	5.20319	4.47053	10.0696	5.8287	6.95709	8.16088	4.99054	7.19584	5.24362	5.83215	9.12034	6.67516	6.10967	4.8514	6.8945	6.60173	7.2984	6.6786	5.56987	6.73588	10.0232	6.05754	6.032	5.82175	7.503	4.97257	8.07058	6.33596	4.59779	5.60461	5.12093	5.39954	8.99394	7.73182	10.8375	6.97148	12.5617	7.2784	7.02497	5.77336	6.73405	7.00606	5.56447	3.99118	10.6503	5.62636
ENSG00000272677	4.35795	4.71537	5.02577	5.0969	7.07845	4.09134	4.91049	4.78045	7.72302	4.55704	4.91182	5.16157	3.70469	3.41729	6.05952	4.88339	5.84081	6.39072	4.7259	4.7812	4.84354	3.72426	6.13834	4.25365	6.24262	4.81051	4.77079	3.90107	5.69578	5.0879	5.42068	4.56486	5.05591	5.9667	4.48957	4.88824	5.17659	4.16483	4.56357	4.13738	5.48082	4.33039	6.65637	4.59158	5.21767	3.58571
ENSG00000012211	14.1944	12.3739	14.159	12.6314	14.1484	12.6168	13.1195	11.8893	12.9714	11.5377	12.9158	11.8423	14.5498	12.7653	13.0104	11.9264	12.9476	12.362	13.0328	12.6077	14.8779	13.1237	14.1206	12.7853	13.8419	13.2084	13.402	12.6664	14.1329	12.4371	12.4892	12.6194	11.8126	11.981	13.2068	12.1904	13.5233	13.0248	13.8275	12.2192	13.9213	12.3261	13.2337	12.757	12.9908	12.3881
ENSG00000173818	11.489	12.5998	12.237	13.3191	13.1376	12.1893	11.185	12.3021	12.1994	13.0698	12.2836	12.1729	10.8432	13.3805	11.4463	12.5841	12.0254	12.764	11.7299	13.1211	12.5731	13.3297	11.2033	13.2259	10.6993	13.1854	13.0782	12.6777	10.9813	12.0462	11.2214	13.166	13.4304	12.6273	12.6279	12.4316	11.9503	12.5727	11.1754	12.8604	11.2804	13.1212	11.5841	13.1847	12.6071	12.6682
ENSG00000205420	6.96626	8.78523	14.2581	2.63498	5.22233	2.63498	5.23821	2.63498	7.92429	2.63498	7.57331	12.386	8.71973	2.63498	3.49286	4.76016	8.84147	2.63498	6.72603	3.38871	4.14263	2.63498	10.598	2.63498	14.2195	2.63498	10.2533	3.54413	7.69388	8.63878	10.1902	2.63498	7.03739	2.63498	2.63498	2.63498	3.47336	3.38205	14.8523	5.77336	2.63498	5.1215	10.8847	2.63498	12.6683	3.78952
ENSG00000225490	6.73017	5.8179	6.57766	5.95985	3.37568	5.9612	7.5257	6.33165	3.38318	6.32841	2.63498	4.2946	2.63498	5.82435	6.78746	7.21925	5.84081	5.85486	5.43777	5.61248	6.95883	8.07844	5.53395	7.9369	6.48113	4.5573	2.63498	5.81647	3.61437	4.15652	3.69094	6.21525	4.99056	6.4715	2.63498	5.11387	7.53829	6.7126	5.42148	6.2435	6.3653	5.61522	5.41465	7.54249	8.91193	6.52998
ENSG00000149262	15.2088	14.4088	14.5416	14.3736	14.8272	14.5967	14.3902	14.3846	14.8081	14.4386	14.774	14.575	15.2542	14.3147	14.4778	13.4542	14.6767	14.2592	14.239	14.4406	14.5601	14.179	14.3591	13.938	13.9872	14.3007	13.7711	14.2752	14.8698	14.6289	14.3449	14.1877	14.7262	13.2227	14.7635	14.1631	14.7995	14.5015	14.8451	14.404	14.995	14.3616	14.4958	14.6314	14.5364	14.6332
ENSG00000259881	4.84786	4.47053	2.63498	5.52278	4.42682	4.35659	3.15733	4.43387	2.63498	4.09831	5.38677	5.16157	2.63498	4.45227	5.83249	3.84103	3.31927	2.63498	3.87685	6.18182	3.72417	4.44561	5.09267	4.57383	3.9799	4.5573	4.2079	4.27447	5.85446	4.15652	4.45774	6.32695	4.04156	3.55309	4.18069	5.30715	7.11221	5.09978	3.36107	4.68114	2.63498	4.04369	4.04391	4.59158	6.56575	4.75912
ENSG00000143409	14.3718	15.2808	14.5628	15.632	13.0104	15.8507	12.9903	15.4614	14.0922	15.1806	10.3897	16.2266	14.0177	15.994	13.8867	14.8688	13.674	15.343	14.4914	15.4074	14.3602	15.6529	14.3151	15.8552	14.2185	15.5338	13.5297	15.3265	13.8566	15.2831	14.4497	15.6923	14.6583	14.6464	14.4135	15.2484	14.2098	15.3311	14.8201	14.4714	13.6221	15.3168	13.5304	15.8708	13.5454	15.4742
ENSG00000158125	14.2943	17.1441	14.3236	17.6567	13.7139	16.8769	9.77744	16.9724	11.1168	16.3422	14.4956	17.7903	10.995	17.0684	11.2547	18.9564	13.2284	16.5404	14.527	17.2336	14.0329	16.23	13.3565	16.8159	14.1427	15.8851	14.8561	15.6763	16.1198	19.8581	12.9641	17.3871	15.1884	15.5394	11.2802	16.3127	12.7326	17.3501	13.6727	16.7242	12.086	18.7163	13.8285	13.111	9.42769	16.1955
ENSG00000261098	9.05116	9.73721	8.7129	8.94113	8.18051	8.77393	10.4533	9.4017	9.23517	10.3566	9.20157	9.29138	8.83151	7.76288	8.97654	7.4458	8.40247	7.95647	8.14512	8.22981	8.42848	8.28582	7.42637	7.81242	7.75646	7.84028	6.81418	9.1916	8.03408	7.61856	9.05182	8.97606	8.66863	6.4715	8.16975	9.14972	9.1793	8.76398	8.5433	9.97939	9.48012	8.78688	8.63614	9.98915	8.24546	9.87464
ENSG00000185614	7.63099	9.10247	8.05284	7.90694	8.56869	7.62487	6.02998	5.79784	7.16701	8.36142	5.83936	7.48182	7.16504	7.56298	8.65489	9.92399	7.95785	10.307	7.83547	8.78943	6.89259	9.6776	7.48357	9.11514	7.8072	8.61835	8.36609	9.13056	7.72466	9.21399	7.51321	8.26412	7.7686	7.79238	8.48601	7.40769	6.33957	7.85249	8.19326	8.27361	8.10769	9.29359	8.72627	10.9708	8.47076	6.5943
ENSG00000180776	17.3835	17.0424	18.291	17.2532	17.2419	17.6263	19.1575	17.8055	20.0563	17.1923	17.8007	17.6031	17.7048	17.048	17.6857	17.3823	17.0694	16.8755	18.4937	17.1568	18.1739	17.5153	18.3917	17.8417	18.66	17.31	18.7262	17.0448	18.3485	17.2658	18.1011	17.0784	17.6138	17.9306	18.0095	16.8095	16.5343	17.6435	17.959	17.2222	18.2993	16.7041	17.3527	16.3264	17.2281	17.2111
ENSG00000162909	19.996	20.4174	18.8777	21.1044	18.1755	21.3581	18.5636	21.1369	19.1287	20.2732	18.1753	21.7831	19.7778	20.9175	18.6577	19.2097	18.5322	20.3123	19.5162	20.4694	20.0217	20.3892	18.9242	20.9134	19.3459	20.5148	18.8976	20.3629	19.1857	20.4835	19.1186	20.7907	19.4145	20.4126	16.5925	19.9813	18.7725	20.0321	19.3451	20.1575	18.9878	19.3566	19.2463	19.3494	18.6742	20.3317
ENSG00000167703	15.628	15.3469	15.3371	16.4787	15.3981	15.3743	14.771	14.785	15.8152	14.8406	13.5614	14.6442	14.5798	15.6446	15.9203	14.9867	16.0247	15.7783	14.6637	15.9004	14.5414	15.7856	15.1104	15.539	15.7916	16.1754	15.0826	15.3219	14.7637	15.5781	15.0984	15.5723	13.9776	14.3116	15.751	15.2684	16.2867	15.6795	15.1248	15.8139	15.8302	15.9773	15.2692	15.1499	15.9396	15.0111
ENSG00000137494	12.9469	12.8696	12.5539	12.6994	11.905	12.8589	12.4753	12.9164	12.5601	12.5188	13.2865	12.3446	13.6609	12.4353	12.5165	11.3531	11.5191	12.0939	12.4854	12.3544	12.9196	12.0625	12.2035	12.0094	11.1091	12.0941	12.778	12.4977	12.9773	12.2878	11.6057	12.5364	12.8526	11.9429	13.4125	12.2943	12.6005	12.5856	12.7896	12.6066	13.081	12.5127	12.5121	12.7371	12.61	12.4357
ENSG00000119714	13.189	11.3546	11.9784	11.4264	12.6029	11.4753	10.3524	10.8039	9.95201	10.5102	11.0112	10.5688	11.2257	11.1285	14.1369	11.4146	12.8844	10.9206	11.9325	11.5058	11.4154	11.3744	11.5038	11.7532	11.3386	10.8589	8.17596	11.3316	10.3112	11.7226	11.3786	11.0625	11.1651	10.1957	10.5272	10.9012	12.1803	11.805	12.9764	10.7205	11.7164	11.9571	14.4135	10.2787	12.6677	9.97126
ENSG00000136819	16.4924	16.6625	16.0453	16.1603	16.5431	16.6692	16.0513	16.5028	17.0436	16.5643	15.9752	16.569	16.2526	16.6127	16.4013	16.6046	16.1811	16.385	16.3333	16.4657	16.5475	16.7734	16.7873	16.5601	16.3041	16.3458	17.2524	16.3776	16.1796	16.1908	16.0986	15.8883	16.6529	17.0025	16.6905	16.1613	16.495	16.0391	16.5677	16.5383	16.5271	16.4462	16.6023	16.9052	17.0083	16.5482
ENSG00000186952	7.05321	7.16608	6.33265	5.8287	4.5981	6.64423	7.93322	5.47516	5.3712	6.42946	5.57409	6.5626	5.29054	5.84827	6.68776	8.18279	4.46372	7.31975	5.43777	6.24962	4.22599	6.95906	3.99655	5.96368	5.06642	6.92632	7.24779	6.54836	4.85479	5.72601	5.12093	5.91437	6.41058	6.85996	6.24669	6.07325	6.52085	6.14237	7.08609	6.86378	5.99816	7.00606	5.17312	7.19486	5.64975	7.22112
ENSG00000272667	7.58177	9.07199	8.36859	9.40194	8.29261	8.69621	9.21927	8.52756	9.22284	9.5075	7.08093	9.09976	7.84733	8.9328	7.10516	9.15793	8.1582	9.03159	7.83547	8.15713	7.77602	9.28756	7.53858	9.19917	7.55591	8.68697	8.81196	9.39652	8.0093	8.18409	7.48544	8.59502	7.46645	9.6167	9.12874	9.01268	10.4079	9.03153	8.02091	9.22421	7.90483	8.26746	9.02911	9.47009	8.58768	8.25714
ENSG00000183682	9.26358	7.28911	8.915	7.56624	8.03151	5.83002	8.11138	6.51687	6.37261	6.00007	8.3865	8.69941	8.28381	8.06988	9.33471	7.16238	8.98421	6.25708	7.6776	6.95398	7.31108	7.30284	7.9103	8.64316	7.88011	7.50205	7.20854	6.95757	6.98448	6.6737	10.6199	9.26562	6.78153	4.87378	7.00454	5.98359	5.2625	8.5247	9.85847	5.74016	10.0396	6.81347	8.67869	5.72886	8.85592	5.76455
ENSG00000066117	16.5061	15.8623	16.1725	16.2897	16.2728	16.0612	15.7318	15.8215	18.169	15.6639	16.2085	16.1541	16.9638	16.0534	16.7643	15.2333	16.5932	15.5969	17.7918	16.2747	16.7869	15.8274	16.9457	15.8867	17.159	15.8393	16.1392	15.8665	17.2033	15.9598	17.278	15.858	17.1479	15.652	17.3857	15.9028	16.685	15.8996	17.1514	16.361	16.5606	15.6589	16.6744	15.7741	16.2703	15.8805
ENSG00000103222	17.6876	17.0812	16.2236	15.0921	16.0313	15.9554	17.4839	15.5633	16.5953	15.7456	16.2393	15.035	18.6747	15.3769	17.6503	14.8322	19.009	15.8026	15.8075	15.7116	16.5621	14.4482	16.7165	13.9155	16.7898	14.4099	16.6624	16.2292	17.0641	15.7719	18.633	15.3148	16.5659	14.3345	16.9484	16.1144	18.1291	15.8505	17.0612	16.1691	18.2934	16.795	18.1762	16.9916	16.4918	15.606
ENSG00000269984	5.4099	6.36022	6.86947	5.8287	7.35452	5.0643	9.82011	5.86811	6.18077	5.15762	11.076	7.07007	6.26971	5.82435	7.57676	4.76016	7.71042	6.18525	7.59472	5.89411	7.80627	3.95451	7.08978	4.90351	9.18435	5.57798	4.91397	5.35038	7.59737	3.79118	7.20793	7.29253	8.12849	4.87378	5.87779	5.92693	7.05472	6.07046	5.60253	4.75249	6.8992	5.61522	6.31663	5.3037	4.67283	5.58423
ENSG00000105227	10.6136	13.2123	8.49272	11.12	9.39367	11.0799	8.47748	10.0911	8.97841	11.7023	10.0588	10.875	11.5863	11.3266	10.9295	10.4385	10.698	12.7709	9.25518	11.0473	10.7102	11.1998	9.1901	10.3272	8.86044	11.7688	8.01864	11.9912	7.97558	10.8496	9.36705	11.0525	11.0947	9.41703	10.6055	12.1068	10.1894	11.1566	9.7374	11.7511	9.72861	12.9643	10.0977	14.1193	10.8487	11.0169
ENSG00000137496	13.5005	12.2915	11.7973	13.2506	15.1105	12.5023	11.3346	12.7027	11.1787	12.3753	13.6084	13.3973	12.9198	13.7815	14.0882	17.1023	14.4254	13.2262	12.8095	13.445	12.5996	13.0151	12.1341	13.5288	12.7301	12.8415	12.449	13.7483	12.5568	13.8677	12.4345	13.8525	13.4092	13.584	13.4463	12.8096	11.0919	13.1323	12.4733	13.3561	14.6662	15.1247	13.5912	12.7123	14.702	11.8013
ENSG00000115415	19.5244	17.5797	16.8142	17.5293	18.7335	17.87	18.5087	17.9699	17.5923	17.4234	18.7427	17.8995	18.9318	17.2576	19.068	21.6845	19.8146	18.1417	18.8622	17.6923	19.8152	18.6087	17.8074	17.7484	18.6897	17.5383	18.0985	17.3532	18.5822	18.7018	19.0158	17.1	20.3018	17.738	17.7885	18.6575	17.5631	17.6552	18.3447	19.4208	19.674	20.0881	19.1629	18.0712	18.8525	17.675
ENSG00000266086	7.06521	6.3144	8.60701	6.46616	10.4433	5.76984	13.1454	7.24894	5.48798	6.98779	10.5552	6.77952	6.93097	7.49717	6.80221	5.14913	8.38414	5.60058	7.13143	6.67574	8.84432	5.6352	8.06812	3.32443	10.2364	5.11704	10.4368	7.12538	8.42605	5.81609	7.67561	7.78933	7.26119	4.87378	8.31301	7.01708	8.01847	6.8684	2.63498	5.35585	6.40781	6.14198	8.10866	4.99469	4.69514	6.39194
ENSG00000214013	13.5358	13.8737	14.326	14.6609	13.2199	14.5097	13.7891	14.8501	14.6513	13.854	15.6252	14.946	14.3892	14.8765	13.5927	14.2491	14.8986	13.9637	12.833	14.2511	14.3902	14.5164	14.0456	14.1182	14.5654	14.3792	13.0998	14.2273	13.7201	13.9128	14.4138	14.5556	13.578	14.5402	14.1801	14.7978	13.9241	14.5465	14.5271	14.6674	13.7428	14.1036	13.9807	14.1349	13.8822	14.0682
ENSG00000123815	14.6949	14.3325	14.4379	14.5839	15.5637	14.3243	13.9721	13.8642	15.5756	14.1791	14.4781	14.6613	14.3117	14.9301	14.4478	14.8615	14.5898	14.4713	14.4604	14.3427	14.7231	14.8166	15.0332	14.8337	14.0207	14.3249	15.2447	14.3283	14.4123	14.4545	14.3942	14.5418	15.1423	14.2381	15.3991	15.0496	14.9848	14.5518	14.6197	14.439	14.2705	14.6583	14.3785	14.6142	14.5402	14.5534
ENSG00000274956	4.84786	10.8841	3.72403	5.36788	3.37568	8.32138	4.35134	7.65506	3.38318	10.734	2.63498	6.77952	8.00127	5.84827	4.0815	10.2647	5.53847	10.4162	3.87685	7.702	3.41407	7.39336	3.44009	6.37161	2.63498	5.16196	3.93898	9.03562	2.63498	7.79854	3.38979	7.17859	3.59261	5.00146	2.63498	9.33718	2.63498	6.7126	4.71244	8.56319	4.1362	9.67915	3.7173	12.4018	4.1131	8.64769
ENSG00000158545	16.9533	16.5675	15.8667	16.5272	15.1972	16.1235	16.338	15.6515	16.8149	15.7057	15.5232	15.8472	17.424	16.2549	16.2619	15.4263	16.5807	15.7587	16.6919	16.5204	16.5587	15.6302	16.3358	15.3842	16.3298	15.683	15.3147	16.2553	16.5211	16.1699	17.7222	15.853	16.9459	15.6096	16.8645	16.1174	16.93	16.3592	16.7551	16.3958	17.1699	16.2352	16.9348	16.4511	16.9664	16.3044
ENSG00000103199	13.2394	12.9842	12.0295	12.9724	12.405	12.5214	13.1822	12.1735	13.0292	12.4367	12.3501	12.3121	13.4769	13.3316	13.0949	12.1748	13.0772	12.7082	13.1662	12.9019	12.9165	12.9695	13.2809	13.0758	12.7726	12.9621	12.5363	13.1486	13.2471	12.2288	13.9017	13.2973	12.9976	12.4829	13.0611	13.1766	13.0366	12.9013	12.4476	11.9424	13.7157	13.0862	13.2199	13.816	13.3159	12.1421
ENSG00000103197	17.9692	17.5064	16.3396	17.4576	15.6915	17.3	16.33	16.5565	17.3001	16.6801	16.1746	17.055	17.2279	17.7731	16.8934	15.4286	17.5442	16.649	17.9934	17.2915	17.4504	16.5723	17.0052	16.5937	17.8635	17.1585	15.5559	17.1524	17.4005	16.8417	17.5768	17.4244	17.7464	15.8897	16.0467	17.4262	17.8847	17.4223	17.3724	17.5114	17.7756	17.0685	17.1189	17.4359	17.0494	16.8223
ENSG00000143093	15.6291	15.7469	14.9388	15.5842	14.6221	15.4072	15.4035	15.2158	15.2218	15.2905	14.821	15.4854	15.2339	15.5895	14.8226	14.6149	15.9955	15.2066	15.7588	15.4662	15.0074	14.9664	15.4372	15.1065	15.7393	15.0555	14.7078	15.2043	15.5267	15.1448	15.0969	15.3911	15.3915	14.5728	14.7218	15.2055	14.9618	15.2908	14.5634	14.8093	15.6986	15.3197	14.9633	16.0892	14.7103	15.036
ENSG00000067365	12.5295	12.4314	12.9889	11.6171	12.9745	11.2653	12.9641	11.0682	13.0994	12.4092	13.534	11.6649	12.8566	11.9594	12.7395	12.9192	12.7345	12.8652	12.8149	11.7593	12.6059	12.6788	12.0569	12.028	12.9335	11.9711	12.7791	12.0141	13.2241	11.8382	13.2163	12.3801	12.982	12.9485	12.9844	12.427	11.9144	11.5242	12.5285	11.8742	13.1957	12.5835	12.9548	13.5999	12.7221	12.3924
ENSG00000167962	16.7028	15.536	16.3328	16.0813	15.7383	15.8022	15.7265	15.1733	16.22	14.6953	14.9581	15.7503	16.5189	16.0119	16.4462	14.6251	16.9393	14.6326	17.0653	15.6335	17.0177	15.483	16.705	15.418	17.7566	15.3104	16.9241	15.5133	17.971	15.9657	17.7597	15.8961	17.388	15.3831	17.1238	15.7887	17.3083	15.7682	17.5185	16.508	16.9639	15.6269	16.8295	15.1366	17.7003	15.8149
ENSG00000204390	9.07801	10.4298	8.42811	9.52976	8.03151	9.28822	9.65902	8.76451	9.937	10.0866	8.03652	9.22662	8.34061	9.25134	9.11982	9.39818	6.98572	10.1448	8.98715	9.0965	7.03244	9.60035	8.34422	9.56685	8.15441	9.54519	6.99439	10.0708	7.66242	9.00536	7.24983	9.35343	8.88336	9.03228	7.27225	8.84367	9.94769	9.27311	8.48301	8.91848	9.74313	10.2237	9.02658	11.0801	9.07101	9.38561
ENSG00000167705	12.4747	13.9402	12.2312	15.2638	14.0561	15.3111	10.131	14.6125	11.1787	14.0072	11.2388	15.2011	11.8611	15.1277	11.6428	14.4378	10.8286	13.9834	12.1329	13.9951	10.5561	14.8262	11.6624	15.208	11.6842	13.9791	13.2039	14.602	12.0766	15.068	10.8562	15.0585	12.773	15.1456	12.879	14.5694	13.2366	14.2914	12.5926	14.7839	11.5157	13.5805	12.2072	13.0082	11.6163	13.7315
ENSG00000253882	11.0576	10.4706	9.49973	10.8483	12.2653	11.6448	9.25858	10.4772	7.93441	10.9599	11.9305	11.2797	9.84873	10.6171	11.1676	13.2971	10.2508	11.4008	9.41715	10.7143	9.76614	11.1958	9.82454	10.9671	10.4589	10.6798	11.7154	10.5569	9.87937	10.4356	10.948	10.4694	12.4667	11.1348	11.748	11.8692	9.04137	11.3183	9.57819	11.656	10.0151	11.3917	10.7713	10.2684	11.7044	10.651
ENSG00000254835	8.17527	8.7894	6.6597	8.21605	7.41951	7.0884	5.99281	8.38085	6.41679	7.93185	7.33965	6.15932	8.09388	6.68407	7.97421	8.38993	8.39943	9.42141	7.09739	7.10735	2.63498	7.3611	6.39965	7.16717	6.91148	9.33085	8.22262	7.31085	6.9326	7.87816	6.07716	7.88316	7.51209	7.73182	7.19704	7.28642	7.86662	7.9452	6.75055	8.37318	7.83291	8.11456	5.0549	8.66719	7.32548	6.80813
ENSG00000074657	15.5313	16.4128	14.3992	12.9482	13.5502	13.5742	14.3634	13.62	13.8924	15.6263	15.3554	13.7943	14.6687	13.949	15.5647	14.8266	14.3968	16.141	14.0755	14.1201	13.7442	13.8932	14.4848	12.5029	14.5469	13.8516	11.3236	15.2662	13.1901	14.1889	14.9005	13.8553	12.6709	12.7454	14.1035	14.9702	10.759	14.4852	14.8627	13.759	14.7053	16.383	16.0482	18.1088	15.9027	15.3249
ENSG00000140937	17.7521	14.3019	16.6636	14.0723	15.9394	13.89	16.9045	14.5673	15.7755	14.2342	15.8894	13.5353	16.2943	13.7658	18.7275	13.8377	16.676	14.7524	17.4109	14.1308	15.8921	12.9701	15.3035	13.2674	14.9585	13.0706	17.433	14.5639	14.2323	14.5501	16.8169	14.0887	15.0565	13.1382	15.4235	13.4067	17.1778	14.4409	16.9978	14.1388	16.516	14.5629	18.7483	15.4144	19.6758	13.7289
ENSG00000137868	11.0539	4.71537	11.4632	6.34866	12.5532	4.66926	9.87932	3.94548	14.4866	5.05733	6.51789	5.88598	9.25309	6.06746	12.6483	4.38745	12.4228	5.54367	10.4205	7.50925	10.5561	5.18681	11.2871	5.10585	16.6542	6.41514	7.39489	6.08628	9.66088	5.83774	11.8733	4.74584	8.05721	4.17762	10.2918	6.70772	7.23113	4.61308	9.68626	5.11438	11.3512	5.73751	12.554	6.63141	13.7156	3.78952
ENSG00000074370	18.1565	19.8805	17.7201	21.1086	16.0503	20.2882	12.1301	19.2105	18.1488	19.3075	17.3997	19.9971	15.8049	21.2123	17.3127	18.6452	17.9806	19.1386	18.3731	21.3241	18.4854	20.0553	17.4029	20.7138	17.1536	20.6344	17.7755	19.8832	17.0452	20.6262	15.9092	20.4891	20.0683	19.2352	20.2264	20.2294	20.2718	20.5392	17.3063	20.3568	15.4818	19.4109	17.6682	17.1028	20.0721	20.7291
ENSG00000280374	5.52053	4.98297	5.32998	5.12981	6.46169	6.35007	7.61937	4.78045	7.22593	6.42946	5.51441	4.2946	5.90773	4.69531	4.83815	5.41161	7.24515	5.35747	5.90458	5.11797	5.02604	5.0262	5.79188	5.96368	7.94384	6.84837	6.29363	5.81647	6.27351	5.0879	6.80866	5.78926	4.04156	5.00146	6.76489	5.55405	6.867	5.48459	6.25159	5.63556	6.55682	6.60689	6.65637	5.12686	4.67283	5.16257
ENSG00000145194	13.0456	12.079	14.3774	12.4819	14.8466	12.4272	12.9105	11.8883	13.0172	11.9525	13.8433	11.6088	14.3056	12.2379	11.7292	13.1112	13.5962	12.1761	14.1759	12.2042	14.0715	12.7313	14.5696	12.6598	13.2599	11.9553	15.6221	12.3571	13.7519	12.9716	14.8212	11.9563	12.7746	14.2856	14.4777	13.0832	13.4174	12.1944	12.7996	12.1418	13.5658	12.668	13.3326	12.039	14.0441	12.442
ENSG00000111727	12.6405	14.6322	12.8495	13.2756	13.164	13.1905	13.217	13.8642	11.5722	13.8589	11.9955	13.428	11.5863	12.8079	12.821	15.3372	11.6954	14.6151	12.0683	12.8763	11.5425	14.3364	12.7212	13.2117	12.0627	13.5287	13.0148	13.787	12.2206	13.5091	11.5322	13.4001	12.4845	14.7968	9.79189	13.2	12.4593	13.554	12.0951	13.1262	12.1126	14.4775	12.5258	15.3573	13.0554	14.2658
ENSG00000237883	6.55366	8.65422	7.44755	8.64037	7.19861	9.18579	8.42314	9.30487	8.37786	8.52026	8.7528	8.94733	7.16504	10.0197	8.97654	9.04625	8.54131	7.31975	6.72603	9.70774	9.01967	10.1324	7.3668	8.58459	7.85017	9.98133	8.49657	7.93233	7.20451	8.66594	7.00754	9.23511	8.05721	10.0616	9.31192	8.62893	10.2698	8.47029	8.01195	8.81999	7.32653	7.98668	6.94155	5.12686	8.37963	10.0371
ENSG00000196757	13.3948	12.6172	13.5697	13.4247	13.7021	13.5187	14.3897	14.4081	13.169	13.2405	13.8223	13.8079	13.2605	13.5243	14.0418	13.075	13.7307	12.7007	13.2479	13.5708	13.2875	13.5413	13.4028	13.9514	13.6015	13.7123	13.5373	13.3078	13.919	12.6589	14.1363	14.4606	13.462	13.4348	12.6518	13.4122	13.3243	13.469	12.7966	12.7916	13.463	12.8754	12.9511	12.4249	12.3994	12.7388
ENSG00000278291	10.1901	9.25493	10.0907	10.047	9.65858	10.224	11.9629	9.8204	12.5924	8.96735	10.6688	9.592	11.8182	10.004	10.9054	8.68427	11.3945	8.67575	11.1517	9.68512	11.0275	9.37688	11.1899	9.71568	13.2653	9.34978	9.97251	10.3428	12.7699	9.38173	13.0217	10.0243	8.51193	10.9845	10.5811	10.6886	10.9291	10.4692	11.8217	11.1371	12.2901	8.10899	10.1786	7.0413	9.42612	10.3692
ENSG00000140931	15.3039	13.7054	14.4245	12.9664	14.3812	13.4217	13.41	12.7127	14.1091	14.0643	12.7691	12.9495	14.0153	12.8828	15.3488	14.1235	14.67	14.7524	14.0212	13.1314	13.6751	13.8807	13.494	13.8473	13.2672	13.8602	11.9621	14.1409	12.933	14.235	14.3488	13.724	12.9167	13.6812	14.0978	13.463	11.2253	13.8997	14.184	13.4648	14.5382	14.8834	16.0053	14.4125	15.3056	12.6272
ENSG00000151498	14.9217	15.1285	14.0208	15.2785	14.4356	15.5299	13.7575	15.2354	13.661	14.5605	14.5648	15.4836	14.9086	15.2107	14.237	14.5589	14.1629	14.9379	14.0062	15.0833	14.4858	15.1199	14.1018	15.2438	13.8314	14.9918	14.4588	14.923	14.4283	14.6004	13.866	15.3122	14.368	15.4413	13.9339	14.6698	14.5812	14.6076	13.8205	14.8035	14.3902	14.3905	14.1989	14.8444	14.327	14.7687
ENSG00000234072	12.0538	10.4417	12.4051	11.0458	11.688	10.4059	12.1564	10.3496	12.7539	9.65383	11.4204	11.0567	12.4813	11.5622	11.8675	9.32764	12.7726	9.62388	12.0463	11.024	11.3254	9.82218	10.9504	10.4016	12.251	10.1338	11.2959	10.3371	12.9156	9.21807	11.4372	10.444	10.9	10.3402	12.2369	10.739	12.8422	11.0016	11.6873	11.1543	12.9509	10.5281	12.0255	9.51446	11.8611	10.557
ENSG00000109705	9.46461	12.4374	8.1737	6.57473	8.18051	9.24702	7.75212	9.5304	10.3364	13.5293	6.29084	9.16266	9.01716	9.15515	9.03215	12.403	9.10479	14.1917	8.75896	8.00464	8.25083	10.5056	8.6526	7.99532	7.21412	9.07616	5.5932	13.0859	5.85446	10.489	8.56411	7.48051	5.53503	8.35364	5.845	11.3054	3.80505	8.76398	8.15715	6.50121	8.93428	13.149	9.83816	15.3625	11.5559	11.2772
ENSG00000241684	5.52053	10.4783	5.18636	5.8287	4.92607	7.08025	7.21745	5.99895	6.2312	8.7397	8.41082	5.72652	5.29054	7.04353	6.3285	9.88592	5.74709	10.2622	3.65893	7.60885	3.41407	8.62469	4.74789	6.70856	4.25585	8.3627	3.93898	8.08921	4.85479	7.03106	3.69094	7.5885	4.92185	9.15917	3.55502	8.65795	4.33798	8.09209	4.56357	6.59623	4.34571	10.5894	5.17312	11.5317	6.17286	9.43745
ENSG00000167555	10.7073	12.5234	11.8428	12.408	9.27005	11.3259	9.46931	11.9832	8.02241	12.2359	10.1579	12.7338	9.08995	12.4392	11.3528	11.0633	8.7466	11.7757	10.122	12.6077	8.42848	12.5781	12.2726	13.5737	11.5622	12.834	7.66983	12.3721	9.37771	10.8796	10.7509	13.083	9.31494	11.5628	7.41182	12.3	6.43308	11.6659	9.52883	11.7846	10.1963	12.8674	10.726	13.639	13.8352	12.2665
ENSG00000237807	7.5734	11.7204	7.9698	8.9656	6.30161	8.72258	8.22296	7.55325	6.984	9.96298	7.51461	8.23398	9.04183	9.65126	9.27142	13.3174	5.84081	12.8455	8.24938	9.54643	6.2469	9.87447	7.59157	8.82896	7.0124	9.4074	5.71178	10.461	6.64067	9.55637	6.07716	8.80449	8.83708	9.64745	3.9158	9.94331	5.74887	8.72965	6.1566	8.22705	7.19367	12.9165	7.43012	14.8682	10.4316	11.0334
ENSG00000277022	3.81956	9.01618	2.63498	2.63498	4.7489	2.63498	5.67766	2.63498	5.10288	5.77143	4.59064	3.62721	6.16504	2.63498	3.38059	8.24429	2.63498	8.8416	3.97001	2.63498	3.72417	6.61983	2.63498	2.63498	2.63498	7.10448	3.57219	6.00193	3.99579	4.70555	2.63498	4.49829	2.63498	5.11801	3.75282	6.55507	4.33798	4.50091	2.63498	3.87897	5.73821	10.1056	2.63498	8.7487	5.31835	6.37981
ENSG00000117650	12.7212	11.1672	14.8192	12.6192	14.7566	12.7795	14.3225	11.8187	14.3324	12.7879	15.1906	11.5702	14.9427	12.3883	14.3719	12.3247	13.3504	12.4994	14.8676	12.9147	14.9149	13.1981	16.5146	13.4723	14.8962	12.0121	15.1043	11.928	15.0162	13.3669	15.1872	12.0724	14.5794	13.8965	15.3682	13.1197	13.8864	13.0532	15.1072	12.0432	14.0776	13.1212	13.4062	9.27759	13.97	13.011
ENSG00000103226	17.2395	16.6379	14.412	14.9065	15.0293	16.1975	17.7386	16.065	15.3039	14.5336	12.8771	11.4366	16.6059	15.641	15.3663	13.8751	14.9597	14.6809	16.5998	15.8245	16.6601	14.9238	14.9098	13.7585	15.5898	14.2176	15.7296	15.9125	16.0401	14.9269	17.6608	15.6444	16.784	15.8212	14.0422	13.6338	14.883	15.3907	9.89789	9.93302	15.6779	14.6414	16.3311	16.0942	14.6291	15.2687
ENSG00000169564	19.7044	20.3407	19.9989	20.0283	20.2947	20.1746	18.6771	19.94	19.6473	20.288	19.4852	20.1706	21.0022	20.033	19.4415	19.933	19.9762	20.1148	19.6558	19.87	19.7008	19.7041	20.1664	19.7078	20.0803	19.4705	20.2677	20.307	20.1305	20.7684	20.1153	19.5408	19.5539	19.8862	20.9417	19.6792	20.2225	19.9007	20.4455	20.1544	19.5654	20.1225	20.0001	20.5511	20.3011	20.2129
ENSG00000164932	16.9219	9.07199	16.7951	9.14186	15.3224	10.446	13.3193	9.99349	14.8032	9.89783	12.7828	8.48232	14.2224	8.18576	17.0482	9.72074	14.8028	10.5606	15.5546	9.70774	14.8418	8.42872	13.8982	8.58459	14.3992	10.1848	11.9864	9.71152	12.1971	11.3156	15.1354	8.26412	12.2382	10.457	16.5488	9.51102	13.2966	10.0392	16.1835	9.49118	14.5532	11.4374	18.3136	9.96591	17.0475	9.09965
ENSG00000070269	14.6599	13.6467	14.159	14.1315	14.1546	14.7086	15.3453	14.8857	14.5426	13.6275	13.7696	14.0547	15.3947	14.3422	14.441	13.0792	14.5928	13.7039	13.8282	13.852	14.1943	13.7487	13.8799	14.0138	15.4065	14.2776	15.0511	14.0594	14.7058	13.5285	14.4352	14.108	14.4788	13.9947	14.1375	14.2087	15.4707	14.7384	14.5485	14.4461	14.1317	13.7313	14.1752	12.647	14.0418	13.7337
ENSG00000131480	6.16329	6.54992	5.95181	5.61722	9.43438	4.29573	6.52134	3.94548	4.61574	6.61236	7.2525	5.16157	4.65473	5.03433	7.42343	5.5624	7.65028	5.7586	6.17491	5.50444	5.57917	5.57936	5.53395	3.60116	6.5575	5.99824	6.91527	5.81647	6.40667	5.83774	6.80866	5.39954	6.98164	5.17272	9.79189	5.98359	6.23948	6.32319	5.78423	6.39942	5.37599	6.42068	5.93652	6.92312	5.43784	7.22112
ENSG00000165632	13.5242	13.8971	12.6465	12.8438	13.5752	12.4667	12.8599	13.1933	12.9306	13.2987	13.9498	12.8122	13.5359	13.2582	13.3809	13.0185	12.7199	13.254	12.9981	13.4133	12.9545	12.7362	12.78	12.6786	12.6603	12.6926	13.1996	13.4	13.2335	12.56	13.5954	12.7224	13.7707	12.8574	13.9524	12.9914	12.3577	12.9187	13.0486	13.0909	13.2216	13.5023	13.3748	14.3472	13.488	13.1795
ENSG00000251493	4.26895	4.47053	7.30226	6.60916	12.0292	5.49938	6.90625	5.38129	9.88321	3.50335	13.0037	5.09654	3.39984	2.63498	5.83249	3.84103	7.78222	4.29917	3.36645	4.57355	5.18664	5.0262	7.48357	5.70506	8.75783	3.7971	10.2468	3.54413	2.63498	3.79118	3.80941	3.99511	11.5344	4.28956	13.0456	3.76643	4.49699	4.31084	12.4499	3.87897	3.71934	4.24254	5.34986	4.13871	4.36885	3.69338
ENSG00000108602	7.89551	10.7059	15.7464	13.6843	11.4844	14.1792	11.108	13.8855	12.1727	10.8372	12.8915	13.6295	9.93686	12.0344	6.63106	9.96274	8.84147	12.1961	10.9689	12.6643	13.7079	12.9663	11.96	12.8424	11.0785	12.0589	13.1676	13.4158	10.9393	10.9858	10.3352	12.0724	8.15389	14.4219	10.221	12.2658	14.8477	10.8568	12.7508	13.9853	9.64493	9.41368	10.6099	9.48503	7.12308	11.2115
ENSG00000109323	14.8852	14.3994	15.0086	14.6966	15.968	14.8303	15.522	14.7149	15.2601	14.7996	15.2913	14.2327	14.4961	14.8478	15.6511	13.9365	14.736	15.0189	13.8655	14.7457	15.1458	14.6861	15.4656	14.9553	14.9678	15.4783	16.2268	14.8846	14.9795	14.0097	14.6279	14.9182	14.566	13.8194	15.2198	14.3456	16.1989	15.1362	14.6278	14.4668	14.4655	15.5835	14.8195	15.4062	15.6647	14.5772
ENSG00000171159	15.5224	14.7364	16.1858	15.1833	16.135	14.8797	14.1802	14.4693	16.3866	14.1224	15.2773	14.7565	14.7232	14.8142	15.5753	15.6028	16.3408	15.0236	15.6577	14.8157	15.7458	15.6226	16.4884	15.9318	17.602	15.2428	18.0612	15.0191	16.3329	15.0838	15.43	14.3602	14.6825	15.4681	16.3855	15.3939	16.5483	14.8952	16.0469	14.9851	15.3882	15.0223	15.4744	14.6069	15.7853	14.6568
ENSG00000149575	7.5134	12.8246	4.84329	7.29112	4.15262	9.32655	6.01152	7.93955	5.85515	12.082	2.63498	9.41601	7.50065	8.75668	8.44847	10.3924	4.46372	12.3534	5.0569	8.36881	5.18664	10.7335	7.04701	8.40542	5.50497	9.38463	3.57219	12.2529	2.63498	10.1105	2.63498	7.68895	4.77268	7.6686	3.55502	11.39	3.47336	10.4332	4.88748	9.91845	8.43866	13.3934	7.43012	14.5971	10.2413	11.7797
ENSG00000151948	8.13036	7.24115	7.33584	6.42806	7.79089	6.35007	4.28543	6.60119	4.76752	9.60095	7.8942	5.72652	5.672	5.3392	8.51913	8.08837	7.24515	8.33188	6.72603	6.07364	5.33026	5.57936	4.74789	3.97802	8.48552	6.50276	4.2079	7.31085	5.31135	7.96338	5.8761	4.90459	6.86319	6.66964	6.24669	7.35899	3.47336	5.48459	5.98263	5.77336	6.49907	8.97013	7.43012	7.90464	5.14091	7.71015
ENSG00000213145	14.9425	17.1605	17.2735	16.1615	19.864	15.3199	11.9985	15.3401	13.8804	16.4232	18.0583	15.996	14.3729	18.0237	15.7574	17.2822	14.0137	16.763	14.798	17.1809	15.6924	18.8528	16.7582	18.542	16.6037	17.8752	13.8316	15.5004	16.2068	18.0259	15.4327	17.6851	14.6034	16.1616	20.7127	16.9636	18.3291	16.3866	17.7218	17.2812	12.6548	15.2907	15.0546	15.7034	16.9583	17.3462
ENSG00000261783	4.59146	5.15337	5.18636	4.29488	4.36398	3.34388	5.20548	4.43387	4.76752	3.84581	4.91182	4.62097	4.9892	3.95963	3.24599	3.84103	3.59405	4.13843	3.65893	3.38871	3.41407	3.72426	4.27534	3.97802	3.4298	2.63498	6.52502	5.94278	3.99579	4.15652	4.78388	4.49829	4.24017	6.574	5.845	5.98359	4.98648	3.38205	4.3327	5.77336	5.48082	4.33039	3.94625	3.61094	4.97294	5.90744
ENSG00000196954	14.3786	13.622	16.5776	14.8646	16.5624	14.4649	15.5523	14.6717	16.3355	14.7577	16.3015	14.2117	13.4624	14.5259	15.4834	16.1325	15.1502	14.6179	15.5463	15.1482	14.9557	15.2251	15.9729	15.8867	16.6308	15.4526	15.7905	14.2563	14.1544	14.8694	14.9672	14.9452	15.9474	15.6493	16.7257	13.7647	15.4721	14.3769	15.3673	14.3363	14.534	15.194	15.5415	13.2372	16.0915	14.3969
ENSG00000132128	17.1914	17.4655	17.4237	16.9804	16.2894	16.8554	17.0686	16.7423	16.6886	16.6053	16.6021	16.5698	16.747	16.7767	17.0343	16.8702	16.7939	16.9283	17.7488	16.9137	17.379	17.2253	17.1832	16.5753	17.6316	17.0705	16.8551	17.0893	17.297	17.209	16.5866	16.8735	16.578	16.9429	16.1067	16.8121	17.3796	17.1016	16.6071	17.1126	16.9361	17.116	16.7735	17.6405	16.9787	16.7267
ENSG00000164930	14.5293	13.7919	14.7278	13.5781	14.7826	13.8592	15.4742	14.3668	15.5477	13.9768	13.629	14.0998	16.0411	13.4837	13.622	13.9952	15.0311	14.27	15.2339	13.4371	14.6876	13.7219	15.8089	13.5656	16.3894	13.9096	15.4512	13.707	13.424	13.6447	15.1666	13.6724	14.4943	14.3749	14.7784	13.4038	14.3861	13.9756	14.221	13.9998	14.4152	13.6834	14.6064	13.9558	14.1267	14.0607
ENSG00000205078	5.52053	7.51759	8.3927	7.39317	9.39726	8.01907	3.66348	4.78045	10.1031	5.70796	3.73535	6.87679	4.41537	7.04353	6.05952	7.02871	6.48531	6.10958	5.56987	7.70801	6.67327	8.46708	6.5143	8.79179	9.12813	8.15764	6.99439	7.8786	6.12661	6.0377	6.25322	8.34107	4.4612	7.6778	3.55502	7.46141	8.34487	8.97405	8.22848	8.95107	5.57828	6.60689	7.58281	5.98843	7.92595	5.62636
ENSG00000240137	4.06733	5.15337	4.84329	4.66826	6.12124	5.2552	4.6861	5.47516	6.05561	5.97343	5.79016	4.01303	5.29054	4.23212	4.57341	5.96354	4.0436	5.94496	5.196	4.7812	4.68784	5.71499	5.25605	5.28178	3.9799	5.16196	2.63498	5.94278	3.99579	5.35525	5.2623	5.65193	4.77268	6.11067	4.48957	4.56426	5.74887	4.61308	4.3327	4.68114	4.64245	5.73751	5.93652	5.68754	5.83374	4.90763
ENSG00000186184	17.3968	16.7194	18.1959	16.5836	17.9353	16.4873	17.6424	16.2733	19.539	16.6748	17.5098	16.1871	18.7232	16.3869	17.8798	17.2109	18.2695	17.0563	18.6758	16.2875	17.3953	17.4016	18.1712	17.2127	19.3365	16.9919	18.5877	16.669	18.9821	16.4451	20.7208	16.4496	16.9329	17.2771	18.1686	16.5545	17.2776	16.4643	18.6868	16.4647	18.0525	16.76	18.3128	17.5179	17.0062	16.6548
ENSG00000213676	18.4844	17.5538	17.567	18.1508	15.6069	17.9187	17.0239	17.8678	19.0124	17.5418	17.3401	17.6484	18.2556	18.4303	18.1512	17.1245	18.087	17.2077	18.2635	18.1564	16.709	17.8832	18.0928	17.9838	17.5602	17.9389	17.0668	17.7825	18.8272	17.4857	17.9604	17.9051	18.1838	17.3042	17.3542	17.7336	18.1816	18.0076	17.9434	17.7793	18.3794	17.9113	18.0052	17.0301	18.3522	17.501
ENSG00000128482	7.5134	10.2418	6.42952	10.0573	7.9941	9.2269	6.01152	9.57261	6.48752	10.6881	7.06054	9.61748	6.45846	10.1141	6.79485	8.79301	6.33992	11.0213	6.0904	9.58115	5.71479	9.63949	6.32975	9.56685	7.21412	9.51825	4.52103	11.1428	6.27351	10.1248	6.07716	10.2847	5.92501	7.90636	2.63498	10.7739	6.23948	10.9744	7.14472	8.44104	6.55682	11.4903	7.53369	12.7271	6.87824	10.6703
ENSG00000263126	9.18343	7.6054	9.72363	7.94325	9.93506	7.59089	7.00225	8.2952	7.08752	7.26346	9.77956	9.19687	7.81905	9.38256	8.93214	6.96358	9.0879	6.59816	8.05944	8.16587	8.80295	6.41437	8.82988	8.00348	10.3826	7.86682	8.31779	8.88035	10.4964	7.69679	9.42297	10.3464	8.99996	6.68803	7.29648	9.66329	7.6355	8.9716	8.76204	8.42566	8.45891	7.71305	8.8052	6.79433	7.20602	8.16522
ENSG00000132341	19.6101	18.792	20.8576	18.7563	19.318	18.9238	20.256	18.6294	19.3961	18.9927	20.606	18.4314	20.3048	18.5224	19.5249	20.3298	19.6829	19.1347	20.0122	19.0374	20.3932	19.4196	20.7917	19.3386	20.8411	18.7763	21.5846	18.7377	20.679	19.9513	20.7132	18.4304	19.5119	20.5333	21.2445	18.8289	19.4515	18.6405	20.4463	19.1989	19.6896	19.0511	19.9353	18.9116	19.6829	19.6476
ENSG00000106635	15.8331	16.8978	16.4163	16.5025	16.6886	16.2332	15.0074	16.2427	16.1726	16.7792	15.2773	16.8442	16.1459	16.6564	15.6586	17.2134	15.8941	16.8142	16.7401	16.261	16.4476	16.9054	16.2567	16.5478	16.5821	16.2429	16.4264	16.5116	16.7612	16.7125	16.3832	16.2668	16.3028	17.5225	16.6337	16.2504	15.7777	15.6655	16.1902	16.7016	15.6589	16.3294	16.0168	17.4304	15.978	16.7769
ENSG00000092621	12.7212	15.483	13.9395	12.833	14.5807	13.4271	12.8487	12.813	12.2876	15.2377	15.4203	13.5269	16.1793	12.8038	16.0716	14.1721	16.3845	16.4554	14.5949	13.7953	16.4557	13.6669	16.1071	12.0689	17.7921	13.4726	17.7725	15.0046	16.019	13.6734	13.1425	12.1524	18.0287	12.6042	18.8928	14.3275	17.9714	13.5008	12.0573	13.6564	16.7868	15.8542	15.3159	18.1291	16.536	14.1185
ENSG00000008300	14.8392	10.6324	13.1302	10.7996	9.92268	10.6314	15.1822	10.1893	11.4842	9.14336	13.2993	10.2502	14.7667	10.6171	14.8518	8.13635	14.5943	9.13463	14.0574	11.2088	15.6738	10.1771	14.7677	10.2709	11.4157	10.7625	10.5338	9.33235	14.7567	9.66505	11.4646	11.7701	15.1457	9.24829	12.4651	11.3519	15.9464	10.9354	14.0103	10.562	11.81	11.1094	13.4555	10.5878	15.3569	10.0236
ENSG00000276728	6.818	7.76643	6.89225	7.57784	7.36188	6.7092	7.24908	7.0538	7.89868	8.00535	7.69722	7.40576	7.11	7.56298	6.63106	6.60173	7.43543	7.40084	7.04477	7.00369	6.67327	7.60096	6.67773	6.49297	6.1065	7.27293	5.41757	8.03412	5.85446	6.96441	6.87449	7.93082	7.68641	6.75929	7.61799	8.35895	7.47839	8.23765	7.02497	7.11502	6.67448	7.74215	7.95199	9.00652	7.49392	7.01776
ENSG00000158246	7.2657	14.7051	7.0923	8.47355	8.76744	9.16478	8.09843	10.6863	8.50886	14.1638	9.74491	10.2718	10.0783	10.8346	6.51939	12.7858	6.17801	16.0374	7.10598	8.39879	9.04524	11.7055	9.73495	6.23895	8.3424	11.3398	5.74917	13.9744	7.1143	11.4096	5.8761	8.05965	7.09106	12.3623	10.2019	13.6078	7.01909	10.8568	8.65681	11.169	7.19367	13.4521	7.91413	18.5377	10.6187	13.8374
ENSG00000253716	9.81247	8.5401	11.1063	9.09827	10.6744	8.41494	9.03907	9.26038	12.6893	9.60095	10.2552	7.40576	9.64159	9.40663	9.65517	9.01452	8.51347	9.55832	10.8147	8.92433	10.9799	10.4805	12.113	9.27857	11.7928	10.2174	13.0098	7.76474	9.52478	8.0018	8.7121	9.76987	10.3041	9.47092	12.4207	8.32678	10.6567	8.99828	9.7374	7.65345	11.3194	8.58897	9.69566	7.65255	9.22604	8.40735
ENSG00000123106	14.3219	14.6902	14.0643	13.7923	14.2035	13.9767	14.7666	14.6484	15.1354	14.8961	13.9667	14.4992	13.8455	13.8572	13.784	14.8211	14.205	14.7866	14.1942	14.141	13.3782	14.4164	13.824	14.4591	14.1326	14.3	14.2105	14.2177	13.8477	14.0955	14.166	13.8166	13.6692	14.3701	15.1628	13.5631	14.8523	13.8515	13.8848	13.8727	14.0762	14.193	14.0759	15.3815	14.0805	14.5004
ENSG00000230630	10.0911	10.4783	9.65722	7.83144	8.68475	8.01907	9.36509	9.77594	9.38278	11.0526	8.55602	8.01274	8.37598	8.18576	10.9366	11.8659	9.48045	11.3188	8.70357	8.39879	8.65467	9.6192	8.68428	9.39779	10.3784	9.963	7.72646	10.6605	8.0903	9.48021	8.56411	9.21121	7.7305	9.67066	6.24669	8.73894	5.62635	9.8202	9.19085	8.35705	9.78383	11.2609	11.0877	12.1072	9.65233	9.3674
ENSG00000151572	6.27135	8.09092	3.72403	4.84068	6.61802	5.92495	5.72399	5.79784	5.3712	5.83215	4.91182	5.88598	4.80864	6.68407	4.95275	5.96354	3.31927	5.35747	5.32219	6.07364	3.9544	5.0262	5.40198	6.23895	4.25585	7.00026	4.77079	6.73324	4.85479	5.47164	4.78388	7.42332	3.59261	5.00146	4.48957	5.88786	6.43308	5.61789	5.67345	6.28981	4.64245	6.68413	3.7173	8.02407	5.51212	7.78529
ENSG00000126457	17.918	17.1081	18.709	17.0586	20.6673	16.6749	18.3567	16.2884	18.2443	16.9268	18.0682	16.4334	17.5852	17.0669	17.972	18.3134	18.4246	17.3145	17.904	17.3944	18.3203	17.6069	18.0163	17.404	17.891	17.0298	19.5263	16.9377	18.8026	18.1793	19.1685	16.7968	18.0107	18.4182	18.2436	17.1578	18.0282	16.7683	18.1314	17.2242	17.5816	17.1121	18.0142	17.36	17.316	17.5961
ENSG00000096093	12.4355	11.9217	11.9724	11.476	12.7217	10.9856	12.321	11.9162	12.7875	11.677	13.2974	11.4255	12.8723	11.9722	12.8092	11.4428	11.9791	11.8088	13.0669	11.7854	12.1814	11.7055	11.8653	11.646	13.5789	12.2903	10.9329	11.4454	13.6534	10.524	11.5765	12.5805	14.0632	11.6755	12.3085	11.912	12.0194	11.6315	11.0817	10.9447	12.6656	12.261	12.8391	12.4642	12.612	11.5905
ENSG00000146215	5.15782	3.54467	10.9688	5.74789	4.15262	6.5047	5.72399	5.99895	3.38318	5.83215	4.1575	4.88011	3.39984	5.15681	7.74226	4.09267	3.79947	4.4406	5.0569	7.40224	3.72417	6.3332	8.30399	6.09265	9.05395	5.16196	3.57219	5.15212	5.65314	5.22811	4.92048	6.51145	5.11823	6.11067	2.63498	6.63928	4.05019	6.38364	7.89501	4.68114	5.23868	4.97686	5.56447	4.848	3.13331	5.27402
ENSG00000150787	13.0668	12.5473	14.5392	12.9866	13.6174	13.419	13.8115	13.3569	14.372	13.2157	13.4885	13.4973	14.1007	12.8248	13.1741	14.7144	13.0371	13.0657	13.649	12.9449	13.2964	13.9008	13.5192	13.9686	13.9371	13.2498	14.4588	12.8589	14.1908	14.0748	13.2685	13.4059	13.3535	15.2069	13.8452	12.6477	13.6322	12.4068	13.6399	13.0774	13.4651	12.6545	13.7926	12.3518	12.8857	13.4724
ENSG00000033050	17.1123	16.457	16.5871	16.1661	17.031	16.4734	17.5083	15.8794	16.9627	16.0987	16.1479	15.9585	17.6316	16.271	16.6761	16.1678	17.148	15.9911	17.1002	16.0611	17.2439	16.1674	17.8459	15.7272	16.8895	15.459	17.4783	16.3095	17.5151	16.475	18.3175	16.0609	16.5847	16.656	17.3374	16.072	16.1777	16.1187	16.9085	16.3766	16.6595	15.85	17.0218	16.3149	17.0817	16.2463
ENSG00000277481	4.35795	3.54467	3.41397	3.83925	3.37568	3.62792	8.09408	2.63498	5.3712	3.84581	4.70679	4.88011	2.63498	3.95963	6.05952	5.24233	8.70289	4.13843	4.13488	4.7812	3.41407	3.95451	9.16537	4.25365	4.47858	4.5573	4.77079	3.54413	3.99579	4.15652	4.96304	3.99511	3.59261	4.48602	13.0893	3.65193	7.42498	4.37756	6.49071	3.5278	6.55682	5.87677	4.43487	3.99118	5.29033	4.22929
ENSG00000109920	15.9485	15.1944	15.8366	15.016	16.8945	14.713	15.8956	15.6741	16.358	15.1554	16.9199	15.5082	15.6635	15.5208	16.7125	14.6372	16.5062	14.6237	16.3418	15.7896	15.7242	14.9212	15.7763	14.7945	16.5045	15.131	14.9617	14.9286	17.0421	14.6786	15.6421	15.9907	16.8329	14.8492	15.3682	15.6322	16.3564	15.6483	16.0858	15.3611	16.6604	15.4185	16.1371	15.6902	15.8455	15.7165
ENSG00000196950	15.24	12.7399	14.9388	12.6981	14.1401	12.8419	16.5832	13.0633	16.4723	12.8271	15.4222	12.5607	15.2428	12.3359	14.4654	12.535	14.8068	12.1599	15.4719	13.0295	15.7324	12.2813	14.9905	12.0771	15.5023	11.9779	16.5313	13.2276	14.6344	12.2094	15.5169	12.7406	15.0893	13.2526	15.2857	12.6883	15.0222	13.2477	15.1059	12.6626	14.6749	12.7615	14.6856	12.8383	14.5518	13.0636
ENSG00000203499	14.3807	10.8575	14.2577	11.405	14.1152	11.13	14.2632	11.0271	15.5224	9.99448	15.5816	11.1026	16.6655	10.951	13.3329	9.82503	12.6644	9.7743	14.2155	10.952	15.5828	10.4673	15.7995	10.927	13.9645	11.395	16.7856	10.5085	13.5377	11.5071	15.613	10.7102	14.6178	9.59745	15.3225	10.824	14.7693	11.1566	14.785	11.0063	14.4195	11.8568	14.136	7.90464	11.6359	12.1891
ENSG00000256262	8.2559	6.36022	5.18636	10.1456	8.69353	9.56528	6.38516	9.88463	4.94575	7.74938	6.71377	10.1036	7.11	9.08477	8.49671	11.7314	8.12546	7.57863	7.48062	8.70799	9.07036	10.6342	6.32975	10.1586	8.45005	7.79951	8.88835	8.88035	7.85093	9.51714	8.42496	8.54997	8.63811	9.28786	9.1488	9.79449	6.95766	9.10254	6.79311	9.45124	7.82903	9.7702	7.69556	5.68754	7.11139	7.09373
ENSG00000161911	4.35795	4.71537	3.95424	6.01254	6.54199	5.92495	3.77917	5.17184	3.38318	6.71183	4.81332	4.88011	3.70469	4.45227	6.45544	4.88339	4.92482	4.78812	4.57632	7.9193	4.44548	6.05754	4.50015	6.37161	3.9799	2.63498	2.63498	4.98177	3.99579	6.30852	3.91493	3.99511	5.05591	4.17762	2.63498	5.67437	2.63498	3.68032	5.3063	5.11438	3.52706	5.48119	5.44593	4.26906	3.67472	5.27402
ENSG00000144821	8.45571	8.28058	7.0923	9.54608	9.64054	9.79513	8.14535	9.99349	6.64422	9.28151	9.14471	11.2582	7.7	10.2187	6.63106	7.24139	7.2984	8.70156	6.99016	10.1099	8.68427	9.65784	7.98006	9.42839	8.58333	10.2804	7.72646	8.93774	7.28939	8.5476	8.84904	10.7809	8.37054	9.57301	5.55079	10.5399	5.49204	9.53566	7.73542	9.36252	7.53185	7.21794	7.43012	6.26458	5.21767	8.19651
ENSG00000260404	12.9063	12.5159	10.897	11.0269	12.2283	10.8624	11.9413	10.5894	11.7311	10.876	13.548	11.774	11.8408	12.4511	12.6194	10.7579	13.3476	10.2337	11.3608	11.949	12.945	11.3094	11.5117	10.8824	12.436	11.9421	10.4523	11.2651	12.8638	10.1906	13.1461	13.083	11.5956	8.73031	10.9127	12.3897	11.9357	12.2695	10.8638	12.1971	12.7101	11.9563	11.4972	11.8893	12.582	12.2243
ENSG00000128340	14.7196	14.2265	16.0329	16.9995	17.4813	15.3244	13.0103	15.6695	13.8375	16.2811	14.6595	15.6401	15.4723	16.1199	17.0314	16.5195	15.9114	15.5845	14.1861	17.968	16.1738	16.4667	15.1147	16.654	15.4604	16.1955	14.9811	16.4588	14.5199	16.8077	15.7513	15.9484	15.0279	15.4368	16.1017	15.7194	11.7664	15.2507	15.4703	15.9679	14.4369	15.7955	15.9488	13.0652	14.4606	14.7457
ENSG00000118503	16.5356	16.4167	17.3801	16.4161	16.189	15.9351	15.9904	17.2165	15.6078	16.6308	16.46	17.2862	15.7805	17.8674	16.5858	15.3284	15.7948	15.9043	15.4729	16.1586	15.718	15.2975	15.0151	15.6845	16.1495	14.9344	15.5399	16.5922	16.2961	16.7746	15.9192	17.0007	16.659	14.9616	14.4623	16.5571	15.5794	16.0231	14.7178	16.4647	16.5249	15.2349	17.3445	15.4457	14.6895	16.4923
ENSG00000151304	12.741	12.8193	13.3324	12.3403	11.9986	12.2139	14.411	12.4122	13.6635	11.7272	13.199	11.9878	13.9168	11.5622	13.0981	13.5277	12.6343	12.5154	13.5759	12.4755	12.1983	12.6289	13.0474	12.4946	13.4401	12.3773	13.104	12.1691	13.3035	12.7779	13.8344	12.1223	13.4458	13.8096	14.1006	11.9234	11.6233	12.3875	13.5167	13.3183	13.6831	12.4006	12.8881	12.1866	12.3308	13.008
ENSG00000165410	12.5135	18.4752	13.7587	12.5373	13.7012	13.914	13.7403	15.0223	13.3645	18.1292	12.5101	13.7873	14.811	13.8852	13.2788	19.1667	11.9212	19.1856	11.4552	13.3586	12.1411	17.3387	12.8759	13.7113	12.2683	15.5252	13.4788	17.2299	12.4194	15.2974	11.3302	13.3365	11.491	17.1233	10.9954	15.9156	11.7039	13.9935	12.601	14.2129	12.4225	17.2914	13.0753	20.6852	15.0499	16.8966
ENSG00000198892	10.9406	12.4809	11.5421	9.56367	10.0882	9.87253	8.605	9.48693	13.249	12.0329	8.96476	9.19311	12.6509	9.90328	12.1492	12.1651	11.0832	12.4517	10.8929	9.84603	10.2924	11.1815	10.3174	9.89069	10.1605	10.473	8.88835	11.9597	10.3112	11.1395	9.28091	10.0834	7.64605	10.7332	9.00577	11.6835	6.13182	11.1123	10.2488	10.5167	11.6242	12.9598	12.1793	13.9954	11.9187	10.9679
ENSG00000178385	10.0389	11.1791	9.01929	9.83996	9.31245	10.2916	12.1088	10.0242	9.65153	9.43442	12.1492	11.2947	10.4514	11.166	10.3784	9.96274	10.3311	10.8033	8.8123	11.0096	7.93228	9.65784	8.80768	9.27857	9.38753	9.88889	8.45809	9.73545	9.90869	8.72165	9.64139	10.3992	10.8059	9.59745	8.12317	10.2231	8.83531	10.7637	9.56448	8.85485	9.93872	10.4652	9.69566	11.4997	10.0236	10.4601
ENSG00000140836	15.8846	16.6285	13.9673	14.914	13.0813	14.8679	17.1104	15.0745	15.97	15.1599	17.0876	14.8776	15.8882	15.1418	14.437	13.7214	14.7843	15.0273	15.646	15.1355	15.8218	13.7772	14.412	13.7552	15.0047	14.9459	13.1375	15.0691	14.0951	13.7132	14.6601	14.5163	15.575	12.7007	15.3141	15.5422	15.124	16.2239	15.2955	15.7951	15.6352	15.8953	15.1084	17.3407	14.6134	15.6046
ENSG00000106479	14.287	13.8187	13.6512	13.4107	14.0852	12.6464	13.5034	12.8002	12.53	13.3314	12.4202	13.284	11.9985	13.967	13.3142	12.2173	12.7831	13.3548	14.6774	13.6727	14.9185	12.8986	13.4693	13.0351	14.4361	13.6859	12.4339	13.5488	12.7253	12.0373	13.8586	14.6693	14.7533	12.0254	11.718	13.5132	12.8932	13.6978	11.6107	12.1732	14.4033	13.7757	13.601	14.5043	13.3276	12.8002
ENSG00000168078	10.1258	11.1902	14.3756	12.5121	14.9159	13.2831	12.988	11.9305	11.7573	13.1792	15.4803	12.04	14.0153	12.414	13.7735	13.0578	12.5687	13.1707	14.0971	13.1821	15.0465	13.3231	13.6611	13.7625	13.8708	11.6271	16.604	12.2664	13.9594	14.1213	15.6686	12.128	15.3753	14.162	16.6971	13.0191	14.0235	13.2252	13.5988	12.8554	12.5724	13.0892	12.8837	9.80139	13.3095	13.8872
ENSG00000165617	14.502	13.8115	13.7481	11.5973	12.443	12.3001	12.7397	11.8893	12.4208	12.1234	12.7851	10.8453	12.9117	11.7671	15.1176	12.4381	12.7845	12.4915	13.23	11.8245	11.7962	11.9916	13.162	11.5337	13.855	11.9367	10.9329	12.9972	11.4324	11.8631	12.1442	11.5731	12.0662	11.8086	15.3352	10.3261	15.3832	12.7057	13.5806	11.6908	12.2652	13.0484	14.2721	14.8268	16.0799	10.7106
ENSG00000117298	18.6533	20.4956	16.9082	20.0166	16.5874	21.0399	17.1891	20.259	17.3011	19.4223	17.3252	20.676	18.2259	19.6089	18.1676	17.2666	18.4719	18.9504	19.4814	19.3268	19.1152	18.1907	17.5156	18.8211	18.6144	18.4189	16.6382	19.4346	18.1146	18.9527	18.797	19.2207	18.6635	18.2663	17.8767	19.4406	16.8822	19.4376	17.8912	19.644	18.7103	19.2785	18.6749	20.1755	17.6121	19.0536
ENSG00000148337	17.4825	17.9876	17.1076	17.5913	17.769	17.2916	15.9694	16.9904	17.8727	17.4241	16.5748	17.0482	17.1138	17.6105	17.6562	16.9335	17.9762	17.2562	18.1112	17.3596	17.8747	17.6003	18.6731	17.364	18.7622	17.5754	17.6336	17.5048	17.6152	17.1633	17.9018	17.1309	17.8201	16.7895	17.8036	17.5901	17.8284	17.3842	18.1289	17.3203	17.5766	17.7535	17.0261	18.4677	17.6325	17.2418
ENSG00000162972	13.6883	13.7181	14.3565	14.5771	13.7723	14.7996	13.9968	14.856	14.3476	14.1364	14.0409	14.4697	14.6768	13.9596	13.4803	14.6046	14.1955	14.2868	13.6794	13.8592	13.6444	14.5115	14.0182	14.5446	14.1059	13.8416	14.9014	14.254	14.5382	14.815	14.3651	13.9213	13.7715	15.4224	14.013	13.7528	13.7444	14.1528	14.3657	14.3241	13.7291	13.5514	13.8538	13.2764	14.2705	14.0751
ENSG00000254535	7.2657	8.90916	7.44755	4.66826	6.30161	6.35007	6.41345	6.42726	6.984	7.85439	5.79016	6.5626	6.84362	4.8514	8.5886	8.43378	7.39323	8.96923	6.92369	7.07052	6.05734	6.75039	6.75958	6.70856	6.1065	8.24117	5.88954	8.18716	5.99707	6.76614	6.34927	6.13559	5.41778	6.574	6.11591	6.41182	4.05019	6.92018	6.90405	5.31084	6.62137	8.03451	8.23249	9.77732	8.01636	6.15606
ENSG00000243290	10.3319	9.95878	4.79344	12.806	9.26221	13.9902	6.11884	11.9536	2.63498	9.33689	10.3122	10.2173	3.70469	10.004	10.0135	8.03241	13.1814	10.2182	4.67796	8.64373	3.72417	10.9986	6.17874	10.0209	5.50497	9.03872	3.57219	9.40197	8.28867	11.5389	3.80941	11.4595	8.55068	12.9311	4.94331	8.56908	5.2625	10.2435	11.0081	10.094	5.33173	6.59093	8.77836	3.61094	8.8241	6.5625
ENSG00000169189	15.8419	15.1233	16.3214	15.7416	15.0319	15.7885	16.3697	15.4512	16.8747	15.6046	14.1796	15.6853	17.0223	15.2066	15.4783	15.6986	15.6357	15.7407	16.3926	15.1166	16.0887	16.0282	15.8784	15.8057	16.2806	15.3476	16.5231	15.6283	15.9685	15.5051	16.8414	14.9436	15.8036	15.9457	15.9414	15.4872	16.4966	14.9791	15.7966	15.2678	16.4378	15.5378	16.5059	15.8721	16.3122	15.0944
ENSG00000223482	13.1507	12.9418	12.3291	13.1498	13.1752	13.0183	11.7106	11.5887	13.0241	10.9907	14.521	13.0117	12.5048	13.0771	13.0066	12.7645	13.6145	12.2653	13.0418	12.9206	13.0459	12.8735	13.8677	14.0395	13.4495	12.8583	13.5023	12.6878	12.6766	12.3917	13.5781	12.8895	12.9872	13.3691	12.7617	12.5037	12.1926	11.0004	13.6282	12.7405	13.903	13.0601	13.4971	12.6606	12.8785	13.0672
ENSG00000246982	3.81956	3.9018	5.46	3.83925	4.5981	3.8399	6.59722	3.94548	6.05561	4.89127	4.81332	4.62097	6.10967	4.8514	5.17949	3.49983	7.14692	4.4406	6.5097	4.7812	4.84354	4.84369	5.40198	3.60116	6.64406	5.16196	5.74917	5.35038	7.20451	4.15652	5.50766	5.65193	6.6133	4.73238	4.73628	5.30715	5.17659	3.90231	5.18056	3.5278	7.68164	4.33039	5.17312	4.26906	4.97294	4.75912
ENSG00000162695	15.6414	14.4475	15.7238	15.0538	15.1265	15.1802	16.8508	15.6538	14.2308	14.6105	16.5165	15.2067	15.2693	14.6517	14.5943	14.9557	14.8162	14.5721	15.8782	14.9473	15.4444	14.454	14.5997	15.2116	15.2813	14.5978	16.4981	14.4074	15.443	15.0628	14.8	14.9841	15.772	14.6133	15.8875	14.5147	15.7461	15.0599	14.9174	15.2075	14.8896	15.1747	15.228	13.0136	16.2188	15.1025
ENSG00000123643	15.7119	16.7176	13.7694	17.3343	13.229	18.0623	13.3778	17.6158	13.5307	16.5937	13.5916	18.1313	15.8108	18.5292	15.0364	13.4965	15.5876	15.7571	14.8111	17.4173	14.3482	15.9875	14.5046	17.3371	14.3585	15.9817	14.2645	16.4242	14.1637	14.356	15.6737	18.2708	15.2978	15.3759	14.8395	16.4633	13.1075	15.9984	15.0498	17.0302	14.8907	14.4544	14.6838	14.0311	14.4617	15.3415
ENSG00000110107	18.6061	17.8153	18.2247	17.9231	18.1791	17.7836	17.7598	16.8585	18.739	17.4798	17.718	17.313	19.0345	17.603	18.118	17.9094	18.4256	17.7441	18.4989	18.4257	18.5717	17.5745	19.0012	17.7062	17.989	17.6763	19.0687	17.5158	19.2555	18.3247	18.711	17.1772	18.7353	17.8008	19.3886	18.0942	18.5862	17.5763	19.0307	17.898	18.6935	17.7805	18.5028	17.4398	18.8826	18.3877
ENSG00000256028	10.0297	7.51759	9.62028	9.34542	9.94857	8.68015	9.45415	8.50594	7.38945	7.27432	10.4806	9.49452	7.73676	9.72011	10.228	7.27396	10.0387	8.30688	9.98472	8.82298	9.49826	8.51546	10.8943	9.33134	10.7641	8.36735	8.49657	9.04609	11.5479	8.07119	10.5496	11.2188	10.0439	7.42798	8.51722	9.39174	9.82951	8.80027	9.36093	8.58181	10.0597	7.79866	9.4132	8.45288	8.09355	8.22714
ENSG00000130508	17.2655	17.4929	17.0443	15.363	14.7719	15.2244	15.408	15.5633	15.7088	15.9318	16.4955	15.5657	16.1906	15.5582	18.5082	15.2874	17.5362	16.6692	17.4323	15.0123	16.2459	14.1575	14.8942	13.8919	16.0463	14.2776	15.0771	16.9172	15.6963	15.6782	17.8738	15.4964	15.9295	14.4122	15.419	15.9504	11.4605	16.8208	18.6875	16.3497	17.2539	17.4562	18.7472	19.4428	18.7918	16.4809
ENSG00000167377	12.7451	12.2103	12.1354	11.3533	12.0875	11.3413	14.0717	12.2672	12.5363	12.1335	12.2492	12.5136	12.5671	12.3199	12.7271	12.273	12.2297	12.1133	12.3211	11.8837	12.3193	11.9404	11.7012	12.011	12.7704	12.0746	11.793	12.1567	12.8108	11.3027	13.0639	12.0829	13.1353	11.729	12.1937	11.7463	11.774	11.8675	12.2252	11.5513	13.1192	11.8969	12.8781	12.558	12.5116	11.8778
ENSG00000131781	14.6027	15.3423	14.4514	16.5419	13.2479	17.2235	13.468	16.1176	13.3215	16.2485	12.3704	17.2891	12.4471	16.2532	11.7651	14.0469	13.6462	16.2704	14.5305	16.3018	12.6785	16.3298	13.9216	17.0188	12.5507	16.9144	9.02622	14.7878	13.0395	14.4616	11.457	16.7079	13.8964	16.6257	12.1023	15.311	14.8266	15.6362	13.3885	14.9688	13.6995	13.3224	12.6906	13.204	12.3753	15.2623
ENSG00000124549	10.8698	8.93948	9.69485	9.12023	10.3455	8.89714	9.93619	9.16014	10.3629	8.7745	10.4555	8.79186	9.60398	8.95201	11.2805	9.56518	10.7365	9.13463	10.6806	9.42427	9.52031	9.58125	9.79099	9.93611	11.4157	9.4074	9.36602	9.30644	11.0638	8.72165	10.9067	9.93223	8.79159	8.52141	8.68694	10.1707	8.95619	9.62862	10.6697	7.82746	11.074	10.5894	11.0104	10.5197	10.4526	10.1009
ENSG00000140832	15.6454	15.9683	15.4394	17.8255	15.1388	18.4216	14.9884	18.1772	14.6532	16.7345	14.672	18.5727	15.2249	17.1298	13.8105	15.4968	15.0284	16.3087	15.0156	16.4554	15.0136	16.8947	15.3605	17.577	15.0632	16.4949	16.2076	16.7759	15.3645	16.1516	15.288	16.8096	15.6282	17.7468	16.8997	16.7635	16.4437	16.8767	15.5701	16.424	15.5488	14.9291	15.2606	13.2755	15.6317	15.6204
ENSG00000186132	10.0555	10.9747	10.8433	10.266	11.0329	10.1128	10.9289	10.8518	11.3044	10.9599	9.63222	10.4806	10.8847	10.3599	10.5874	12.1315	10.354	11.452	10.8147	10.5319	9.97478	11.5114	10.8639	10.913	11.2492	10.8705	11.5554	10.7325	11.1691	10.9858	10.0844	10.5344	11.5299	12.1838	9.74652	10.0022	11.1341	10.2657	9.98625	10.1866	10.5689	11.0452	10.9609	11.6961	10.3165	10.7845
ENSG00000176678	11.1292	11.3009	11.1722	10.6911	11.3549	12.0568	11.4486	11.5758	10.2162	10.3257	10.2927	10.4619	10.8005	11.5622	10.23	10.3447	12.7309	10.5195	11.9499	11.1912	11.6476	10.7898	10.7253	11.179	11.4244	11.6832	9.89235	11.5908	10.9813	11.9241	12.1986	11.0525	10.3154	10.0206	14.7048	10.6385	6.867	11.6587	10.1695	11.042	12.5547	9.13817	12.9354	8.39075	14.6278	9.31293
ENSG00000143369	15.2619	15.543	15.7061	14.2077	14.4356	14.5476	13.7029	13.4957	15.1225	14.8202	14.7947	14.2859	14.4685	14.0169	15.3733	13.2673	14.7718	15.6407	15.9499	14.0286	14.4631	13.1666	13.6436	14.2063	14.8691	13.5931	14.1066	15.5427	13.9496	14.7754	16.6084	14.5129	14.1656	13.6776	13.3013	16.0108	14.0645	15.4154	16.2766	15.525	14.8403	15.7701	16.0765	16.048	16.4122	14.9797
ENSG00000136021	16.6126	17.1584	16.8859	16.9999	16.8354	17.5415	17.2329	17.5619	15.7438	16.6871	16.5753	17.4768	16.3172	16.7928	16.1532	16.7548	16.0964	16.7965	16.3615	17.0982	16.6262	17.1112	16.3663	17.0046	16.4631	16.8192	17.0043	16.7303	17.0504	17.2173	16.6194	17.1401	16.7475	17.5143	17.284	16.5918	16.3214	17.1114	16.5944	17.514	16.3331	16.337	16.2753	16.5135	16.0161	17.421
ENSG00000167553	20.2026	20.2671	21.0345	20.2745	20.3118	20.1883	19.6197	20.0937	20.5281	19.2368	20.2559	21.0159	20.9104	19.8305	19.3617	19.8322	19.1945	19.2071	20.6549	19.3834	20.6554	19.4186	21.9131	20.0814	21.0785	18.9057	21.6116	19.2744	21.2262	20.9734	20.6934	19.4342	20.2253	21.8628	20.6328	19.2161	19.865	18.7638	20.0912	20.6042	20.563	18.9601	20.0059	18.2125	19.4026	20.061
ENSG00000153283	9.98473	10.7343	8.91222	11.8094	13.2097	12.1544	8.59582	11.543	7.77462	12.9994	11.5383	12.5271	8.15851	12.1066	12.4173	12.1849	11.3105	11.9358	8.73153	12.8993	9.73348	12.8829	9.21441	13.3615	9.10298	12.3716	8.62616	12.3592	9.86103	11.6556	9.56558	11.9302	12.3059	12.7013	10.9049	12.0313	9.49833	11.8237	10.4462	12.4558	9.6305	11.383	12.2016	9.54043	10.8542	11.0891
ENSG00000124596	14.055	13.8283	14.3062	14.2771	14.0637	14.4559	15.223	14.7044	14.8558	14.421	15.4199	14.3312	13.7486	14.2834	14.408	14.8428	14.4123	14.8459	14.3044	14.9149	14.73	15.2317	13.6309	15.0195	13.9112	15.1179	14.2692	13.7598	14.1943	14.401	14.8562	14.1745	15.6846	14.4632	16.2302	14.4373	14.729	13.8949	15.0459	13.7625	14.3175	14.6409	14.3532	14.3452	15.3656	14.5598
ENSG00000112799	10.6803	9.07199	9.59973	11.6996	11.4016	10.5133	8.9166	11.006	8.59745	11.007	8.48143	11.2582	8.63145	10.7795	11.5471	11.8272	9.54787	11.0692	8.78588	12.5674	9.01967	12.1123	8.86717	11.1286	9.65827	11.4399	9.95683	11.5819	8.90929	12.1075	8.49968	10.937	8.86151	12.0662	9.85838	10.4001	6.33957	10.6444	10.605	10.2737	9.6012	12.0653	10.0977	9.48503	11.1269	10.0371
ENSG00000213398	9.50034	10.8516	10.0647	9.10429	9.85258	9.43738	8.49405	8.39269	9.14442	10.7022	10.6244	8.67804	9.07568	8.98703	10.72	10.5622	9.70995	11.0542	8.98715	9.31064	8.71327	9.71473	9.08853	9.11514	10.4628	9.91137	8.24216	10.7866	10.16	10.0511	9.20001	10.7962	9.86554	8.88919	9.52904	11.0726	9.39115	9.63326	9.22805	10.0843	9.36413	11.2006	10.4929	12.412	9.31944	10.3836
ENSG00000107929	17.2307	17.0031	16.6357	17.3343	17.8867	17.4995	17.5655	17.3861	17.245	16.6549	18.2705	17.3945	16.9091	17.276	17.0323	15.8293	17.3928	16.3875	16.8831	17.4104	17.7065	16.6511	17.381	16.9183	17.5527	16.9323	15.2053	16.829	17.1663	16.8866	18.3466	17.1587	17.7384	16.4718	17.271	17.009	17.3229	17.4052	17.8571	17.4921	17.2087	16.6759	17.2545	16.1059	17.2435	17.1628
ENSG00000266872	5.83643	7.42408	7.60725	7.21882	4.84047	7.19791	6.95506	8.59055	6.16355	8.87771	5.73918	7.67775	6.99316	5.30462	8.1251	2.63498	5.97889	4.4406	7.82512	5.04141	7.31108	5.81477	4.74789	5.57776	6.48113	6.22191	6.60802	8.0129	5.46824	6.78835	6.91676	6.19575	4.24017	5.37195	7.98112	7.05255	8.00034	6.60269	8.99573	4.6056	7.61998	7.59037	8.4597	7.73491	7.32885	5.92433
ENSG00000169684	9.81247	10.4641	11.4699	9.42938	10.9253	10.0517	9.15404	8.25688	11.7147	9.08294	11.2343	9.51876	12.3992	9.07479	9.97916	11.1744	10.4614	10.6935	9.53763	10.357	12.6206	10.6035	11.8189	10.8306	9.5857	10.6351	12.7805	10.0759	11.5451	10.7878	12.0104	10.6031	13.6333	10.4218	12.3978	10.2084	12.7537	10.4279	11.4238	9.40756	11.2733	11.1017	10.6937	11.3953	10.8618	11.5578
ENSG00000144649	9.50034	10.888	8.67737	8.84128	9.53708	9.31793	8.00899	7.89032	9.95574	10.8244	6.02059	9.64528	8.15399	9.21317	11.5118	10.298	7.55509	10.9054	8.14512	8.2587	10.0077	9.14345	7.56153	8.99762	7.65621	10.2084	4.2079	10.1409	4.77466	10.7649	6.34927	9.08533	6.74368	9.73595	4.18069	11.4857	5.17659	13.044	7.50573	10.2636	9.82243	11.8547	10.1486	11.9379	11.1021	10.8245
ENSG00000242950	5.77869	5.52501	3.95424	4.29488	3.89192	4.09134	10.274	3.94548	4.167	3.50335	10.9572	6.15932	4.9892	5.19529	4.41691	3.84103	4.24245	2.63498	4.34424	5.50444	4.22599	4.44561	7.24916	2.63498	4.88183	4.5573	3.57219	2.63498	4.27445	3.67438	4.78388	5.25369	5.05591	3.55309	3.55502	5.55405	4.05019	4.94278	3.65154	4.94572	4.78518	4.56103	3.94625	4.848	3.33631	5.27402
ENSG00000169682	16.5468	15.2607	15.2661	15.9451	15.7753	15.9338	15.4583	15.0708	16.0861	15.0926	15.0645	15.5822	16.8934	15.7378	15.5398	14.6338	16.1551	15.3198	16.2478	15.2711	15.9208	15.5593	16.5488	15.4996	15.5545	15.387	16.6178	16.0144	17.1067	15.6682	16.3987	15.5551	15.6031	15.408	17.1277	15.8205	15.5077	15.9906	16.0039	15.6451	17.0193	15.6759	16.6348	15.3142	17.2805	15.3311
ENSG00000229391	11.2788	10.5452	9.98633	12.7471	12.8627	11.2091	8.80682	11.006	2.63498	3.50335	3.73535	5.54659	10.551	11.8473	13.889	14.1387	13.7254	13.2743	8.09863	10.2684	11.8781	13.3593	8.35738	10.3093	10.3445	12.5026	12.4321	13.2802	9.89748	12.2917	10.7043	12.3552	10.5924	12.0308	13.0938	12.6705	6.37771	10.8798	10.2092	10.6854	11.7352	13.9955	11.9706	10.9419	12.6297	11.4425
ENSG00000180549	5.71847	5.78446	9.48112	7.53087	7.09624	5.22519	5.65391	6.22917	9.88842	7.46655	5.68628	4.95622	5.7948	6.27492	8.59706	6.16355	6.14913	7.23382	4.34424	6.98401	6.59201	7.28575	6.70554	6.76738	9.25911	6.48566	8.76321	6.58729	9.97628	6.75491	7.73577	5.1745	5.64315	4.87378	5.12238	6.41182	5.08488	4.61308	6.67287	7.00874	8.05876	6.60689	6.73316	5.06239	5.57113	5.247
ENSG00000110880	18.2237	19.9367	18.5697	17.8383	18.0849	18.2663	18.5705	18.2035	17.4633	19.1718	18.5133	18.4119	18.2939	17.5242	17.9895	19.3867	17.7044	19.7145	18.3216	17.2701	18.3731	18.4892	18.3938	17.3325	17.9919	17.4526	18.0226	18.7084	18.9421	18.7615	18.7653	17.3822	17.8635	19.3254	18.6477	18.3393	16.5575	17.8332	18.5249	18.5807	18.0671	19.5101	18.289	21.315	17.9785	18.8695
ENSG00000178093	8.29712	6.83531	9.261	8.53133	7.70084	7.87124	8.19079	8.64101	9.65153	6.32841	7.01886	8.07131	9.697	8.3685	8.67499	7.50186	9.04187	6.10958	8.44447	8.49558	6.82315	8.59035	9.67665	9.3378	7.98849	9.52243	7.08392	7.37882	9.66088	6.96441	8.49968	8.80449	8.69358	8.86524	8.48601	8.2296	8.70337	8.23765	9.23384	7.18987	10.048	7.52488	8.84022	6.83232	9.17557	7.2743
ENSG00000124785	9.18891	12.9749	10.2209	10.1112	13.8721	11.9598	14.78	10.48	15.2391	13.4732	13.5388	11.3199	11.0237	11.292	12.519	14.2958	10.0367	14.1244	8.9376	10.8418	14.4364	12.3555	14.1509	11.9772	10.6262	12.5145	10.4855	12.8175	8.53999	12.38	7.79916	11.1619	8.95114	12.2888	14.0775	12.5555	10.2848	13.3901	16.0692	12.4558	11.5391	13.7667	13.9036	14.3025	17.5932	11.9842
ENSG00000167118	16.1543	16.268	17.3593	16.5553	17.1195	16.8059	15.5586	16.0549	17.6902	16.2504	16.0234	16.4174	15.8858	16.5576	16.5358	16.9214	16.7652	16.452	17.0017	16.5156	16.7831	16.8331	18.0023	17.0703	16.9168	16.5643	18.4577	16.4662	16.8205	17.1197	16.9709	16.3438	16.677	17.4325	16.9745	16.6967	16.1777	16.2103	17.1267	16.5048	16.535	16.5019	16.7098	16.3929	16.6201	16.5442
ENSG00000141469	7.19102	8.76843	9.41599	9.58105	6.82452	10.1395	12.8812	9.77594	10.0884	10.3731	5.79016	10.875	6.20079	9.44975	8.90004	10.5278	6.68897	10.0451	17.3534	9.89416	8.68427	9.69547	7.88627	10.5757	17.2263	10.9509	6.52502	11.1654	8.53999	9.27797	5.76371	9.98394	7.241	11.5917	7.48738	10.5399	8.83531	9.31615	7.46032	10.9811	7.09991	10.8653	9.02658	11.1963	9.39357	9.31293
ENSG00000187134	10.0205	13.0856	13.0756	10.4648	15.2567	11.909	11.771	11.6079	10.8539	14.4644	11.1905	13.355	11.5804	14.671	12.3333	12.8309	8.12177	13.538	9.75342	13.2938	8.06826	12.7605	8.46265	12.292	12.0489	12.82	7.08392	12.7113	9.46834	12.9851	9.01833	13.6303	10.4613	13.0221	8.47545	14.925	9.94769	13.2	9.26432	11.2196	9.38677	13.3485	9.66344	14.1106	9.80319	13.447
ENSG00000099953	21.1657	11.4875	17.2914	11.6749	17.23	12.1561	17.4479	12.6371	19.8972	12.0116	15.014	11.0905	19.4036	12.2554	15.0855	10.4265	18.573	12.0847	18.2543	11.8744	18.7315	12.003	18.781	12.894	14.992	11.2639	13.5073	13.0217	14.9146	11.1667	19.3084	12.2693	14.5689	11.8473	13.2822	12.3615	12.5297	12.4125	18.7759	11.8006	20.4535	11.8489	22.0349	13.3998	20.6235	10.6205
ENSG00000213225	7.76931	10.1765	10.8176	12.3939	4.5981	11.2671	5.44777	8.72763	5.64657	9.82592	5.0035	10.8832	4.9892	11.2089	4.28476	8.01326	4.81447	9.40972	8.87881	8.08059	6.46074	9.32771	10.4676	8.80117	5.44091	8.45305	4.98014	10.1212	6.15723	8.78909	4.17967	6.98872	7.5399	9.01061	5.845	9.49664	4.05019	8.47029	5.11305	11.4855	5.00267	8.75869	5.01307	9.10652	5.00826	8.82277
ENSG00000271833	3.48403	4.47053	4.68761	4.52178	5.3493	3.62792	6.64566	4.43387	4.167	4.6312	8.58481	2.63498	3.93128	3.72858	4.95275	4.38745	5.92868	4.13843	3.87685	5.25924	5.18664	3.41414	4.74789	3.60116	3.74566	3.46752	5.04317	4.16337	5.85446	3.89524	5.2623	3.4392	5.83718	4.48602	5.7056	5.30715	5.74887	4.61308	5.78423	3.87897	5.66938	4.81459	4.21643	4.59158	5.05954	3.58571
ENSG00000185634	7.84078	9.75862	7.21471	4.52178	6.89742	8.12573	8.29661	7.44369	9.07527	10.1216	6.14275	7.95169	6.90963	6.90358	7.03831	10.7483	6.74769	10.0946	7.42686	6.58707	6.42986	8.74507	5.91704	5.48595	6.20504	6.41514	4.77079	9.21963	4.85479	8.29265	7.36103	7.42332	6.41058	7.48153	5.37659	8.68357	3.47336	8.01814	8.86757	8.22705	7.60642	10.3625	8.19238	11.4997	9.32366	8.83828
ENSG00000163531	13.4278	16.0091	11.8498	14.0643	10.3831	13.866	12.9653	13.9636	12.9933	15.6439	13.0199	14.3576	14.0109	15.0999	12.8937	14.4244	14.9677	15.9866	14.1032	15.2349	15.0219	13.762	11.1844	13.6587	11.9155	14.8772	9.84629	14.5299	11.1169	13.4406	11.9715	15.1603	11.8458	11.817	10.3623	15.9045	15.3075	15.2099	13.4756	15.1963	13.4513	15.6823	13.1223	17.6294	14.8305	15.0075
ENSG00000169188	16.345	15.1995	16.7329	15.6565	16.2882	15.6776	16.5225	15.3775	15.2181	15.0328	14.8787	15.5308	17.2142	15.5241	14.9392	15.0722	14.9152	14.9354	15.9268	15.4608	17.4252	15.3439	16.6496	15.7075	16.0436	15.1233	15.9071	15.3435	16.8061	15.8141	17.3832	15.1631	15.6976	15.8408	16.0099	15.2984	15.0777	15.4556	15.9212	15.7366	16.587	14.887	15.908	14.3883	15.5437	15.383
ENSG00000119777	18.69	17.8606	17.1398	18.1153	18.2456	17.9894	16.6439	17.6192	18.1736	17.2638	18.2211	17.7881	18.5631	17.9303	17.8647	17.5512	17.9439	17.5642	18.7498	18.0413	17.9842	17.4795	17.8901	17.5867	17.943	17.6461	18.3967	17.8454	18.6742	18.7758	18.3209	17.7499	16.2238	17.4508	18.1471	17.8303	18.0268	18.0167	18.2221	18.185	18.0057	18.5381	17.9365	17.4361	18.4728	18.2922
ENSG00000245105	7.5134	10.0794	7.52961	6.87726	6.12124	7.36148	6.89629	8.67047	8.07822	9.9512	5.0893	7.48182	6.50199	7.38841	7.58953	10.3849	6.49679	10.5104	6.70354	7.83408	6.36601	8.79718	5.59552	7.53694	6.40045	7.85361	6.26828	9.38556	5.69578	8.1244	5.53548	7.06557	4.55829	8.15059	6.00185	7.61148	4.05019	6.80369	5.44883	7.03606	7.92681	10.0102	7.93048	11.5353	8.90744	10.0119
ENSG00000264672	6.95339	3.54467	7.68092	4.41361	5.54674	5.39615	4.41382	6.60119	4.56085	4.83096	5.0035	5.3399	5.53739	5.80003	5.57914	6.297	5.96235	4.4406	5.49213	5.68836	5.49098	5.18681	5.17681	4.66449	5.50497	3.46752	6.0172	5.6777	4.85479	5.19439	5.39042	6.49562	5.94194	6.66964	3.55502	5.30715	6.77021	5.69216	5.14723	4.8844	6.52823	4.87092	6.2307	3.99118	5.10895	4.39783
ENSG00000233087	5.68736	6.2181	6.21063	7.89771	3.6716	7.32747	6.84541	7.16853	7.51619	6.97451	5.38677	6.41467	5.56537	7.45927	7.37995	6.47633	7.33071	5.94496	4.62816	6.78223	4.57249	4.93808	7.27718	7.09256	5.81272	6.53635	7.83344	6.89698	5.73716	6.79933	7.3223	7.48051	5.62219	7.29068	3.55502	5.47654	4.33798	7.99424	6.14013	6.55897	5.78771	5.33281	5.84653	4.76805	5.35934	6.84379
ENSG00000177485	15.8617	14.0352	15.7557	14.219	15.683	14.7393	18.5995	14.9087	15.3903	14.3046	14.5609	14.8342	16.4186	13.6566	14.9574	13.9703	14.7731	14.3393	15.2237	14.5278	16.2563	14.2436	15.9448	14.2324	15.7266	14.4855	15.2294	14.0334	15.7985	13.7194	16.6277	14.115	15.2562	13.9887	14.9622	13.8403	14.6592	14.0834	15.2926	14.6239	16.2509	14.1302	15.128	13.7002	14.652	13.7862
ENSG00000130714	14.9113	15.1164	14.459	15.6102	14.893	15.4303	13.9663	15.062	14.673	14.952	14.3187	14.9177	14.5676	15.6432	14.1133	13.658	14.5189	14.8204	14.8111	15.1429	14.636	15.0836	15.473	15.0449	14.387	15.134	15.866	14.9734	14.3213	14.2232	14.8846	15.3669	12.414	14.5293	14.4135	15.1321	14.6477	14.9468	14.578	15.5291	14.3152	14.6772	14.0781	14.7348	14.1052	14.4177
ENSG00000198909	15.1783	15.8768	14.2646	14.2906	14.9584	14.3178	14.3872	14.0921	13.5249	15.6434	13.8589	14.0583	14.8932	14.7298	15.5959	15.301	15.0625	16.2763	14.3812	14.7265	14.6134	14.9951	14.1797	14.2544	13.7651	14.9826	13.0094	15.6448	14.2966	15.0541	14.3297	14.9935	14.2804	13.7198	13.7765	15.211	13.5301	15.3535	14.3746	14.4576	14.8342	16.5117	15.3187	17.4286	15.2609	15.2051
ENSG00000055813	8.71719	10.566	5.46	6.44087	4.29767	6.75093	6.35629	6.79253	4.56085	8.52482	3.96767	7.9156	6.10967	8.49742	8.0593	10.6882	5.2658	9.14877	6.57314	8.9996	2.63498	8.12237	8.37475	9.17411	9.15284	11.2099	5.16103	8.78349	8.51087	8.31571	4.45774	7.53552	4.92185	7.6686	5.50924	9.36735	4.93443	8.85437	6.61469	8.6671	5.6869	9.19712	6.42883	10.5356	7.70551	9.78372
ENSG00000105197	16.404	15.5003	16.7009	15.6216	18.4009	15.4582	16.7032	14.9119	16.5413	15.2347	16.2454	15.2236	17.4488	15.6094	15.888	16.4188	16.3222	15.5756	16.5402	15.574	16.407	16.0102	16.8381	15.8894	16.4839	15.5698	16.5195	15.5886	17.3932	16.0943	17.2616	15.3784	16.5036	16.9818	16.669	15.7157	16.1357	15.3405	16.639	16.1168	16.4628	15.3824	16.138	15.9771	16.0046	15.918
ENSG00000275765	8.67482	8.97285	9.06999	9.01119	9.02323	8.77393	8.77192	8.03325	9.27749	7.95901	7.2525	8.1276	9.31917	8.47483	7.42343	8.54903	6.86724	8.60231	7.95892	8.11711	9.21482	9.23963	7.74645	9.5941	6.64406	7.98059	8.07058	8.7667	8.44465	8.45373	7.1293	8.44725	6.4814	9.22024	6.24669	6.9051	9.12459	8.6246	8.9889	9.10701	8.80973	8.51927	8.97499	9.72794	8.47076	7.89538
ENSG00000168743	14.9877	16.0482	15.4094	16.5332	17.26	16.5588	15.5894	16.9783	13.4213	14.9885	15.8613	16.4465	17.2523	15.9646	15.5451	13.0663	13.7308	15.4446	12.9412	15.1558	17.2364	14.5957	15.817	15.5468	15.8019	15.5338	15.8947	16.0141	16.0463	14.8131	18.553	16.3802	17.5876	14.9311	17.0445	15.7621	17.0566	16.6309	15.1297	16.432	13.3225	14.9408	16.4146	14.1067	16.4653	16.009
ENSG00000157600	17.4851	17.7631	16.5485	18.5495	17.6156	18.8054	17.8076	18.0421	16.4343	17.5619	17.028	18.9605	18.2976	18.631	16.022	16.2271	16.3745	17.1355	17.2785	18.235	18.2403	17.3862	17.3068	17.582	17.1031	17.6121	16.5622	17.4527	17.6001	17.6702	19.0422	18.1137	17.2985	17.4433	15.7393	17.7847	16.2637	17.8734	17.5288	18.3519	17.7198	16.7862	16.9654	15.4408	15.9336	17.9408
ENSG00000164938	14.6325	14.8396	14.4245	15.5861	15.349	16.075	14.4632	16.9334	13.8924	15.4659	15.465	16.6502	13.0834	15.6787	15.445	14.4906	15.0178	15.5322	13.8399	16.0844	13.0612	15.4364	14.5103	15.6775	14.2163	15.6899	13.1676	15.7804	13.7257	14.307	13.1218	16.7958	14.7877	14.9935	14.5261	15.1007	13.4764	15.0013	14.3858	14.0677	14.2626	14.9803	15.9434	15.2526	14.3897	13.7601
ENSG00000060566	7.79113	7.70593	6.89225	12.6669	12.668	11.7324	5.76883	12.617	5.10288	14.3235	4.3199	15.4357	10.4895	13.4186	6.20036	7.62476	6.8133	11.7081	6.99016	10.5785	6.67327	13.576	9.40181	15.2615	10.2503	13.704	4.2079	12.4668	8.40087	10.3656	9.2606	14.8844	6.4814	8.16375	4.18069	11.7727	3.47336	6.32319	7.89987	6.50121	6.15656	8.72266	7.3754	5.3037	4.36885	9.97126
ENSG00000101144	15.5859	11.7813	17.4731	10.6298	14.6105	10.3646	10.3963	10.8752	15.5342	11.1203	15.1139	11.5918	18.833	10.3732	13.024	11.0856	11.4086	11.7419	11.4105	13.1619	16.1214	9.71473	17.5346	9.5941	16.998	11.6592	17.8011	11.5819	16.9101	11.1041	15.3366	10.0008	12.7906	9.22024	5.55079	11.3973	6.33957	11.0028	15.4543	11.3201	11.4981	11.1198	14.6583	12.641	14.543	11.0091
ENSG00000272189	10.8203	9.75862	11.1722	10.6422	11.7245	9.05699	11.5692	9.57261	12.178	9.55498	10.2552	9.47915	10.9861	10.0846	9.13731	9.9842	10.8012	9.13463	11.4941	10.9038	9.82194	10.4035	9.95291	10.72	10.2084	10.1366	11.683	9.03912	10.7788	10.736	10.0728	10.5238	10.5035	10.3604	12.5831	9.63585	12.8749	9.27311	10.8651	10.3421	10.9548	9.86082	11.2182	6.51928	10.9556	11.0252
ENSG00000255121	7.5134	6.08777	6.50551	7.39317	7.61098	6.19189	7.6786	5.17184	6.64422	7.25251	7.49956	6.44042	8.00127	7.28817	5.74275	5.96354	7.24515	5.35747	6.42965	6.66341	7.70073	6.15549	6.23726	6.09265	4.88183	6.22191	6.29363	6.64378	6.74473	7.87816	5.50766	6.51145	7.1428	6.36107	6.5795	6.70772	7.29208	7.72463	6.77199	7.11502	6.9996	6.68413	7.3754	6.3976	6.72282	6.5943
ENSG00000198590	6.16329	5.52501	6.95848	4.99306	5.93466	5.36909	7.5576	6.22917	4.61574	5.42062	10.2862	5.54659	4.80864	5.72442	4.57341	4.62398	6.01141	4.13843	6.5097	5.50444	6.15528	5.0262	6.75958	6.09265	7.8072	5.32813	6.29363	5.81647	6.12661	4.75396	5.39042	6.67483	6.33606	4.73238	6.36646	5.67437	6.01532	5.2404	6.07228	6.04148	6.07957	5.61522	6.2307	6.11783	5.37274	5.16257
ENSG00000072818	11.5852	11.0617	11.2083	13.4846	13.8343	12.0776	9.31002	12.5677	10.0436	13.4767	12.4537	12.9826	9.56536	13.52	14.5752	12.5294	12.5805	12.0749	10.0517	14.763	10.8335	13.1165	11.1356	13.1449	13.826	12.9057	10.2192	13.1933	11.9489	13.2015	10.815	13.3089	14.825	12.496	11.5979	13.5446	10.8679	11.4423	12.0951	12.8753	11.3512	12.6545	13.1683	10.7499	11.1119	11.2481
ENSG00000271303	15.8275	15.8982	17.3375	15.2043	16.3942	15.4431	17.9112	15.5868	15.4176	14.1484	15.8902	15.1227	15.8867	15.5424	16.0041	15.485	14.3326	14.9954	16.7413	14.1998	16.1069	15.1433	15.8399	15.1233	16.1374	14.5841	16.7977	14.5231	15.5797	16.1385	17.6814	14.4097	15.8855	16.4058	16.4688	13.8883	14.0519	14.5502	16.6153	15.2632	16.7501	15.1599	15.0797	14.9712	15.3934	15.4413
ENSG00000173933	17.1765	16.8626	17.3344	17.3315	17.341	17.1808	16.7281	17.0889	17.9751	16.9136	16.8237	17.0509	17.7889	16.8276	16.9385	17.445	17.2898	16.9882	16.8698	17.1676	17.056	17.2678	17.3798	17.2019	16.488	17.0018	17.562	16.9233	17.2538	17.092	16.4337	16.7533	16.9043	17.3917	16.6775	16.8299	17.635	16.702	16.6553	17.0406	17.2954	16.9283	16.9864	16.8808	17.5207	17.067
ENSG00000175984	10.6136	9.86908	8.3927	8.98749	6.03102	8.79893	9.21927	8.99925	8.09636	8.83804	8.46603	9.19311	10.7468	8.2973	8.5651	9.21489	9.9143	9.45971	7.22108	8.39879	7.03244	8.357	8.14606	9.7231	8.55022	9.15901	3.93898	9.30644	8.24689	8.39	7.00754	10.4542	7.1428	9.67066	3.9158	8.45467	4.56941	9.02211	8.9659	8.60019	8.10769	8.82136	9.19611	10.5197	8.01636	8.64769
ENSG00000099331	17.7667	17.5878	16.4978	17.9979	16.7794	17.2916	16.3673	17.0034	16.2958	16.6269	16.9324	17.9683	17.6448	17.8146	17.7633	15.8867	17.3183	16.5247	17.5529	17.8301	17.1579	16.5602	16.5578	16.6969	17.6261	16.8279	15.9906	17.3085	17.152	17.2574	17.8372	17.8051	17.8977	16.0954	16.872	17.4647	17.0027	17.4082	17.4375	17.851	17.3778	17.5701	17.4723	17.4032	17.3946	17.0489
ENSG00000130749	16.0818	16.234	14.8853	16.5087	14.9733	15.8979	15.9136	15.8814	16.2187	15.8149	15.7626	16.2266	15.9842	16.2757	15.8323	14.8137	15.5476	15.6921	16.2387	16.4239	15.9972	15.3785	16.0214	15.179	15.579	15.5201	15.6206	15.8447	15.2068	15.9337	16.1836	15.9629	16.6347	14.5591	16.3616	16.0995	16.4017	16.2378	16.1178	16.0874	16.2837	16.3327	16.1007	16.3784	16.3469	16.0348
ENSG00000099625	5.52053	6.64536	7.0923	6.01254	6.83516	5.13096	6.25039	2.63498	9.02647	6.52383	7.69722	5.72652	9.38428	6.25726	8.47394	5.41161	7.95785	5.06198	9.21415	4.96021	6.2469	3.95451	8.45041	4.25365	7.503	3.46752	7.39489	5.94278	10.6324	5.94125	6.80866	5.53145	9.79468	5.00146	9.98839	6.34164	5.74887	5.73957	7.97555	8.27361	6.8992	5.87677	7.20649	6.3976	6.36972	6.08295
ENSG00000114978	18.0429	18.2493	18.2346	18.51	19.0382	18.6414	19.6678	18.9359	18.2841	18.5032	18.2946	18.867	18.5533	18.3422	17.884	18.6697	18.366	18.2594	17.6534	18.6189	18.4508	18.6396	17.7872	18.7923	17.7941	18.4906	18.4784	18.4443	18.4166	18.4341	18.1244	18.3096	18.2102	18.8888	18.2384	18.2062	17.8172	18.4303	18.1366	18.6158	17.9382	17.9276	18.2982	17.8694	17.8236	18.2215
ENSG00000196867	11.1505	11.5643	10.5305	9.85552	7.25512	10.0744	10.0693	10.0911	11.9031	11.6943	7.46897	10.2098	11.2083	10.3319	12.0955	11.7878	7.4822	12.0557	7.52607	9.86225	9.52031	10.8227	11.5365	10.2316	9.17714	10.9625	5.88954	10.9349	11.7749	9.19132	10.2958	10.116	7.7686	10.1201	6.76489	10.573	4.98648	9.61144	8.79112	9.70368	10.7112	11.1815	9.12452	13.0397	11.758	10.8823
ENSG00000110811	14.1649	13.9309	13.4467	12.1677	14.227	12.4007	11.8663	12.1614	12.668	13.6109	13.3581	12.437	12.4422	12.065	14.8552	12.6112	13.111	14.1459	14.4483	12.5631	12.7096	12.1241	12.1913	12.2924	13.0522	13.0378	10.4676	13.5372	12.1814	13.7545	14.2325	12.2174	11.233	11.9571	15.7144	13.7211	9.90936	13.5977	13.5909	12.9433	13.4582	14.2702	14.9425	15.6224	16.2065	13.106
ENSG00000157999	5.01179	5.52501	5.32998	4.52178	6.69021	5.2552	8.605	5.17184	5.3712	4.89127	8.7717	4.62097	6.38282	4.23212	6.13169	4.38745	6.48531	2.63498	6.92369	6.07364	5.57917	3.95451	6.5143	4.57383	6.0006	4.81051	5.21633	3.90107	7.36954	4.15652	7.00754	6.67483	6.41058	3.91319	3.9158	5.42235	5.34333	4.37756	5.18056	5.11438	5.57828	5.48119	5.44593	5.68754	4.67283	4.90763
ENSG00000185499	17.1585	18.4081	17.5386	19.0829	13.5869	17.9359	11.1309	18.8536	11.0162	17.4456	19.6422	17.6523	13.9316	18.5339	16.3112	17.8004	16.3099	17.5502	15.9689	18.6929	19.116	18.0142	19.6624	19.2682	17.7454	18.8449	13.4081	18.0091	16.6514	20.9287	16.2038	18.5246	19.7779	13.9183	18.8334	20.3558	17.2127	20.7096	17.7837	19.2504	13.6566	20.2214	16.7014	16.2444	20.9615	18.717
ENSG00000260816	5.52053	2.63498	4.2258	3.34349	4.15262	4.52272	9.85259	5.17184	2.63498	3.50335	6.25524	5.54659	4.41537	4.69531	3.24599	4.09267	4.60682	4.78812	3.36645	4.39174	4.22599	4.22611	3.99655	2.63498	3.74566	2.63498	2.63498	4.98177	4.59779	3.89524	4.17967	3.7585	2.63498	3.91319	3.9158	4.88824	3.47336	4.61308	4.56357	6.04148	4.1362	4.81459	5.56447	3.99118	4.00001	3.58571
ENSG00000144152	8.34213	9.39006	8.82931	9.56367	8.44593	9.24702	7.47313	7.93955	6.32702	9.35999	8.49666	8.6618	7.04301	9.25134	10.3973	9.07422	8.93259	9.52619	7.71171	10.2094	8.3237	9.0706	7.64268	9.08473	7.39098	9.4074	7.46316	9.84549	8.0903	9.14703	8.49968	9.30681	6.54887	6.93877	7.73773	8.94131	6.13182	8.99828	8.42346	10.0175	8.10769	8.97013	9.35386	10.856	9.61149	8.62231
ENSG00000095203	17.3858	18.0383	17.443	19.2932	15.612	20.1556	17.5288	20.1209	16.9121	19.1522	16.4636	20.4808	17.1754	19.5628	16.3328	17.1699	17.3891	17.97	17.1821	19.1944	17.2329	19.1149	17.7989	19.5474	17.4334	19.0535	17.6395	18.8247	17.3997	18.4819	16.4232	19.5402	16.544	18.8382	16.4262	18.4545	17.5132	18.8329	16.554	18.8545	17.6139	16.5887	16.1496	15.5585	15.6424	18.5236
ENSG00000130234	16.3467	14.7302	16.0276	16.8799	11.3391	16.2611	18.2528	16.8213	11.9516	15.9514	10.8664	16.8045	19.6357	14.5334	13.9632	12.6273	14.4771	15.2944	14.5753	14.3272	17.1986	14.3999	15.1537	14.5743	13.8498	13.5931	12.5511	12.5864	16.2251	15.0008	17.2672	14.2687	13.0822	13.5328	8.61182	15.5432	11.9076	15.33	13.125	14.3654	16.9626	14.5846	17.2248	12.5182	5.83374	15.099
ENSG00000211666	12.7597	14.3685	13.2575	18.381	15.6393	18.459	10.4575	16.7149	5.69567	15.705	13.9529	18.4032	7.92901	18.238	18.6291	15.7957	18.5224	18.6749	13.2901	19.107	10.2122	18.8329	14.1989	17.046	10.2786	15.9114	8.28047	17.8297	15.9554	18.9015	8.55078	17.7427	16.6868	19.6812	9.1118	13.7456	12.6635	16.8835	16.1197	17.8898	13.685	16.2969	16.0991	12.7458	19.8795	13.9747
ENSG00000163956	18.3504	18.2416	18.0195	18.1026	17.0692	17.9793	16.6947	17.4164	18.2097	17.5979	16.6933	17.4116	16.9267	17.9404	16.5566	18.0243	17.2688	18.0587	17.845	18.1995	18.243	18.3311	18.0004	18.1744	16.2929	17.714	19.0481	17.8584	16.6224	18.241	17.1662	17.8656	17.5532	17.8428	17.5849	17.6027	17.6651	17.771	17.3164	18.1723	17.0756	18.1195	17.5915	18.1776	16.9925	17.8933
ENSG00000274536	9.29444	6.54992	8.82931	8.41336	8.28488	8.3555	5.70101	9.3541	4.94575	9.55498	9.45646	9.35672	5.41946	6.83408	11.7984	9.61046	9.44552	8.44315	7.27535	8.52985	6.42986	7.5009	8.6202	7.7556	10.4599	8.39952	6.91527	9.44218	8.49311	8.03923	6.94766	10.4129	9.14086	9.71823	4.73628	6.70772	3.80505	6.39836	6.25159	5.11438	7.44814	9.50559	8.41006	6.83232	6.01343	8.86233
ENSG00000189120	14.2089	9.62041	13.8827	11.0614	11.3312	13.0017	13.5508	12.1238	12.6469	10.7072	11.1704	11.6131	16.8676	11.1285	14.2293	10.599	12.7951	10.4374	14.3969	11.174	13.8117	12.0768	16.662	12.6543	15.6596	11.9082	11.2207	10.2923	16.5173	12.5422	13.2908	10.4409	15.4629	9.44422	12.3423	12.8879	10.1894	12.8346	13.5221	10.7761	12.5333	12.4563	14.4173	7.50776	9.62181	11.7568
ENSG00000213402	11.1913	11.7517	9.85084	14.9537	14.7471	13.158	8.21498	13.3279	7.73465	13.9691	10.7135	13.6158	9.00215	13.8912	14.4303	13.7274	12.0731	12.9581	9.91085	16.2369	10.0525	14.7227	10.9263	14.802	11.277	13.5169	10.5971	14.1136	11.8981	14.7178	10.0646	13.4164	12.4413	14.1074	11.8049	13.9071	10.7336	12.5757	12.786	13.745	10.9707	13.4403	12.8219	10.1812	11.836	11.2385
ENSG00000111879	5.77869	10.6324	3.95424	7.02037	6.30161	7.3947	6.95506	7.0538	6.71657	10.2258	6.25524	7.83094	6.0123	6.90358	8.41777	10.2647	8.8189	10.3504	8.28379	8.9996	4.84354	7.79448	3.99655	7.40762	8.02645	8.51308	4.2079	9.38831	6.9326	8.0018	5.39042	7.24615	5.74352	8.2152	3.55502	9.01268	4.56941	7.7704	6.41081	7.59044	6.4286	10.0916	6.13925	11.8396	6.8362	9.47195
ENSG00000139618	11.7648	10.1876	13.4467	11.1284	11.2586	10.8771	16.1946	10.6621	13.5334	10.0124	13.3368	10.8902	13.9738	10.7224	13.6639	10.4083	13.0496	9.32095	13.8538	11.5208	13.981	9.9909	13.5626	10.7817	14.8626	10.2493	12.5878	10.5085	13.839	10.9665	13.5788	10.8491	14.3532	10.3388	13.6664	11.4418	12.957	11.7465	13.5435	11.4706	14.057	11.4462	13.1472	8.13436	12.2151	12.5583
ENSG00000224287	10.444	9.93264	11.4528	10.1466	11.6532	9.84279	12.6191	8.82687	13.1199	9.56164	9.07032	10.4255	12.2652	9.00554	11.5612	11.2203	12.9332	10.4735	10.2071	8.94732	11.694	11.2849	10.6228	10.5214	12.4158	9.68035	12.4125	9.29477	11.5087	8.85875	11.5707	10.3287	11.3858	11.5709	12.7801	8.10446	10.1639	8.67658	11.4756	9.63626	11.9884	9.18658	11.2462	10.3749	12.1105	9.33652
ENSG00000114812	16.1343	15.868	14.274	17.8584	13.8293	17.8985	14.5398	17.7856	14.9102	17.1726	15.2983	18.3256	14.0721	18.3892	14.2151	14.5494	16.3548	16.045	15.8078	17.5312	15.7917	17.2756	16.9121	18.3033	15.6755	18.1258	15.4535	16.9477	14.9019	16.2324	13.4571	18.5409	15.3241	17.0476	14.2428	16.7761	17.9313	17.1627	14.7755	16.9575	15.832	14.5523	14.7842	13.6328	12.7171	16.4237
ENSG00000279878	4.59146	3.9018	5.71449	4.52178	4.7489	3.34388	5.62975	4.43387	5.10288	4.39401	5.57409	5.3399	4.80864	5.19529	5.29079	3.49983	5.74709	3.72101	6.65749	5.63823	5.33026	3.72426	6.59091	4.57383	7.39098	3.7971	4.2079	3.90107	6.74473	2.63498	4.78388	5.53145	4.4612	2.63498	2.63498	4.12507	5.88838	4.61308	4.3327	3.5278	3.71934	4.33039	3.7173	2.63498	4.57948	4.59137
ENSG00000169313	4.84786	7.58635	5.71449	8.91851	6.12124	8.01907	5.33196	6.60119	4.61574	9.4584	5.51441	8.07131	5.29054	7.61217	6.74231	11.5166	6.17801	11.5414	3.87685	8.49558	3.41407	10.0234	5.79188	8.82896	6.1065	9.13192	3.57219	8.45171	4.27445	7.46881	4.39405	8.77544	4.24017	8.11717	3.9158	8.62893	3.80505	7.9797	5.042	6.59623	6.22959	10.8183	5.01307	9.3993	6.11907	8.0366
ENSG00000165389	16.7938	17.195	17.4208	16.9322	17.5871	17.3747	16.6885	17.7377	16.1256	17.5241	16.4016	17.7376	18.1099	16.9517	16.5897	17.9171	17.0625	16.9993	16.2194	17.071	17.5195	17.4546	17.0969	17.6356	16.3536	17.1422	17.574	16.4796	16.7375	17.5463	16.505	16.7848	16.1049	18.5338	17.4468	16.5431	16.653	16.8447	16.7557	16.5322	15.9296	16.2802	16.4146	16.0734	15.847	17.3711
ENSG00000101265	14.451	14.9227	13.296	15.6054	16.5444	14.0068	13.7329	14.8359	12.2259	15.0478	12.8013	15.1227	12.5048	14.7134	15.7345	15.215	14.0791	14.5634	13.328	16.586	12.7618	14.6275	12.6465	14.2266	13.4717	14.1867	11.5554	15.1608	12.44	15.1639	12.8689	14.9577	13.4663	13.8551	11.5888	14.8124	9.90936	13.4894	14.5974	14.8556	13.5195	15.0556	14.947	15.0711	14.5566	13.8499
ENSG00000134698	14.7176	14.9789	13.5608	13.767	13.7365	13.982	15.4698	14.1772	14.0291	14.5752	15.6525	13.7309	14.3137	14.4352	14.3536	14.162	14.9677	14.7337	14.2829	14.1834	13.6359	14.3059	14.351	13.5972	14.8993	14.8341	13.1858	14.1711	13.8914	13.1254	13.6497	14.5569	15.4294	12.9385	13.7895	14.2317	14.4626	14.2082	13.8553	13.3928	14.7592	15.0334	14.0961	15.909	13.8971	13.9757
ENSG00000166788	13.5441	12.5473	13.1013	12.9148	13.4925	13.2058	13.3342	12.7586	13.4768	12.6918	13.6778	12.5541	13.9878	12.7041	13.2358	12.7559	13.3013	12.2761	13.3956	13.0581	13.8755	13.2933	13.5656	13.2117	11.9551	12.5037	13.5102	12.2461	13.5294	13.1489	13.4413	12.7767	9.9652	13.3773	13.6019	12.5425	13.8781	12.7222	13.8251	12.8051	13.4373	12.4505	13.2304	12.3732	12.9702	13.2279
ENSG00000145391	16.5973	17.7554	16.5617	15.3194	16.5496	15.8761	18.0651	15.5443	16.9373	16.8584	17.7027	15.4557	16.6168	15.5829	17.1362	17.5938	17.249	17.8067	17.1008	16.3175	17.542	16.5106	16.5131	15.7481	16.4224	16.6004	18.1288	16.7914	16.9246	17.0487	16.9213	15.9696	18.1295	15.7395	17.2597	16.0584	16.7716	17.0602	17.2446	16.2903	16.7117	18.0841	16.8445	18.4795	17.7231	17.0714
ENSG00000213999	7.74716	6.38258	8.11695	12.5823	9.26417	8.07748	5.76883	9.93403	5.17507	6.66296	7.54426	8.36683	6.89884	10.8932	10.0463	7.32667	7.3871	6.10958	6.99016	14.9084	7.09266	7.99162	6.25624	10.0349	8.3424	8.34393	7.0097	9.61865	8.93583	10.3489	7.24983	8.52303	8.32336	8.02646	5.0653	10.6907	8.24064	7.89959	8.2704	10.094	6.70031	8.03451	9.70993	6.14842	8.36824	6.96208
ENSG00000174871	5.37097	6.33749	6.33265	6.57473	5.62347	5.1631	4.28543	5.99895	5.95893	7.74938	7.90566	6.63119	6.28643	6.68407	5.48952	7.68248	5.05899	7.65991	5.90458	8.26278	5.60737	7.88796	5.79188	6.23895	5.88614	8.11952	4.77079	6.21659	4.85479	6.0377	5.2623	7.36376	6.44643	5.83995	6.11591	7.90098	5.49204	6.48363	5.042	6.86378	4.48168	7.89249	5.62016	8.08027	7.02262	7.45786
ENSG00000140564	17.8487	18.4811	17.006	18.9548	16.079	18.5643	16.4435	18.2541	18.2168	17.8996	16.3611	18.3461	17.4038	18.6799	17.162	16.8914	17.1353	17.4439	18.4245	18.5788	18.5564	17.6778	17.1858	18.2986	18.6971	18.0597	17.6367	18.025	17.6227	18.5842	19.2788	18.3502	18.3596	17.0059	18.3059	18.0376	19.0464	18.7138	18.5202	18.8746	17.7586	18.4788	17.7754	17.5209	18.3212	17.8515
ENSG00000187474	15.6596	12.9507	12.7615	14.7508	15.4852	13.6421	13.7907	13.5773	12.2876	13.104	13.9854	14.352	12.2321	13.1678	15.3768	14.2442	14.7881	14.5951	12.3448	13.2835	13.184	14.1794	13.3868	14.5987	13.6144	14.4269	13.1116	14.5526	13.1807	15.4976	13.2973	15.3028	14.1047	15.1248	13.5836	11.3748	7.36007	12.4777	14.368	12.4678	13.4467	14.5226	14.4077	11.1199	14.2003	12.8852
ENSG00000074582	14.5953	13.7359	14.8336	14.0609	13.9401	13.6936	14.4545	13.404	14.0092	13.823	13.646	13.3241	15.6894	14.3308	14.4165	13.9837	15.4521	13.9366	14.2141	13.7518	14.4964	14.0167	14.9215	13.8473	15.1995	13.5554	15.5946	14.0786	15.4612	14.0727	14.7632	14.1755	14.731	14.671	13.8963	14.2875	14.6366	13.9327	14.9459	14.1092	14.6384	13.7741	14.1141	13.9187	14.1034	14.0405
ENSG00000224152	9.07505	10.5102	9.51628	10.6305	9.83947	10.3342	9.13727	10.1127	10.9411	10.5959	8.37005	9.39652	8.94574	10.4094	8.95533	11.0756	9.72459	11.0716	7.44049	10.2886	9.66916	11.5091	9.72144	11.0947	9.33666	11.2652	10.9665	10.3484	8.16699	9.2363	8.98404	10.0715	9.48891	11.1323	9.90237	10.4532	12.0384	10.738	9.15673	9.96173	9.16439	10.5622	9.10786	11.4693	10.5969	10.0684
ENSG00000163950	16.3821	15.1861	16.1483	15.3316	16.2956	15.452	15.6484	15.3037	16.8265	15.3201	16.3917	15.1051	16.2874	14.9423	14.7734	16.0572	15.8506	15.2341	16.3035	15.9284	16.8365	15.6921	16.8746	15.6932	15.6028	15.131	17.5248	15.3108	16.2048	15.8608	16.0644	15.1086	16.4673	16.5802	17.271	14.767	16.253	15.1337	15.8642	15.3641	16.1055	15.1867	16.5678	15.2328	15.5152	15.8124
ENSG00000163938	17.4704	16.1891	17.931	16.2209	16.9141	15.8354	17.5092	16.3477	18.1322	15.3678	18.1135	15.7613	17.6854	16.1498	17.4211	17.2134	18.0934	15.5898	17.6843	16.4366	17.3512	16.6788	17.9925	16.7789	17.3615	16.6973	18.4937	15.6841	18.1607	17.1286	17.3249	16.1722	18.019	17.8937	17.841	15.7317	17.6003	15.8404	17.623	16.5619	18.0438	15.8904	17.9312	14.7599	17.6578	16.8944
ENSG00000272150	9.41165	10.313	6.29884	9.91612	8.8298	11.2738	9.39009	10.8496	8.13196	11.0999	8.58481	10.6616	8.25455	11.4946	7.89755	5.52621	8.52746	9.45971	8.83309	10.6228	8.85882	8.89044	9.28957	10.7805	9.9678	9.89856	8.77667	9.14363	8.85007	9.0288	7.69997	10.7744	8.55885	8.39327	6.3433	9.63876	8.57047	10.2323	5.39357	8.23295	8.44375	8.9732	8.95915	9.57156	8.43687	9.20425
ENSG00000139354	12.401	12.7613	13.7347	12.303	13.3768	12.6168	14.1145	12.8994	11.5064	12.3671	13.3529	12.709	13.8805	13.1608	13.032	11.8507	13.1822	11.5414	12.4522	12.6427	12.8987	12.7011	13.41	13.0042	14.2834	12.9145	14.6747	11.9597	14.6775	12.6295	13.4619	13.6695	13.8249	13.2569	13.9401	12.3622	13.8101	12.8731	14.1304	13.9766	12.6822	11.6174	11.5914	10.2422	11.1568	12.6046
ENSG00000181350	14.9053	15.8066	13.9509	16.3884	14.4989	16.4725	13.2242	16.7505	16.7057	15.7046	14.7344	16.5453	14.4235	16.3602	12.7526	14.1385	12.5153	14.9398	14.8702	15.5694	13.4869	16.004	13.5944	16.507	14.3842	15.8406	14.4917	15.6092	14.62	15.3401	14.3422	16.2475	15.0778	16.0914	13.3601	15.433	15.3616	16.1747	13.7104	15.9943	14.5945	14.6608	14.4324	13.3443	11.8137	15.5689
ENSG00000225766	5.01179	4.55753	4.84329	6.38891	5.76534	7.19791	5.67766	6.22917	4.37998	6.46796	5.24611	5.16157	5.14822	6.47134	4.64489	5.10002	6.54178	4.88584	4.57632	6.71213	4.68784	6.93731	5.40198	7.21014	4.72421	7.79951	5.74917	6.13985	3.99579	4.60289	3.69094	6.17598	6.07053	6.4715	5.845	6.02014	7.98812	6.90997	4.12451	4.24692	3.52706	4.81459	3.7173	4.59158	6.49535	5.56268
ENSG00000106399	13.664	12.7666	14.9099	13.7059	15.449	13.8525	15.3323	13.4634	13.7788	13.8882	14.1009	13.6768	14.9848	13.1572	13.8848	14.7515	14.5327	14.2331	14.6904	13.8761	15.4444	14.2709	15.5129	14.4612	14.5579	13.7633	15.5177	13.8194	15.3695	14.4076	15.6004	13.4621	14.5403	15.3448	14.8152	13.4266	13.7694	13.199	14.4386	13.3383	15.5138	13.5254	14.6581	12.5835	14.6676	13.5894
ENSG00000106692	14.2803	14.0953	15.1577	13.9381	14.231	14.4993	16.2128	14.4411	14.4365	13.5466	14.1653	14.2148	14.2162	13.6622	14.5574	13.5208	14.5555	13.9248	15.2583	14.3272	15.5028	13.8708	15.3469	13.9054	15.1212	14.3315	15.3521	14.1104	14.5378	13.3609	14.9828	14.2687	15.2072	13.9614	13.2717	13.9835	14.7065	14.5553	15.017	14.351	14.7356	13.8804	13.9903	13.7635	15.0414	14.3661
ENSG00000103449	9.29444	10.9747	9.19173	11.4264	9.20607	11.7508	9.30251	10.9188	7.44007	10.2603	7.84742	11.0895	9.3629	11.3777	5.29079	9.76337	11.9372	10.0946	11.2055	12.0089	10.1021	10.5678	9.95291	11.5337	11.5464	11.6752	9.05964	12.2664	11.3866	11.6895	11.8796	12.5854	9.72016	10.0206	5.17715	10.5844	6.43308	11.1034	8.571	11.6648	11.3952	8.55249	11.2522	7.50776	9.71213	10.139
ENSG00000167434	15.001	19.1827	5.57887	20.3891	5.08232	21.4658	3.66348	21.2849	5.24362	20.2021	11.8696	22.4345	6.10967	20.425	6.05952	18.1115	7.92016	18.8568	13.1952	19.7091	6.75017	19.7092	16.1666	20.8316	14.6704	19.2487	5.04317	20.4024	16.5838	20.2028	10.8763	20.3966	15.2529	20.6704	2.63498	19.741	4.05019	18.3212	12.5109	17.7998	7.85601	16.2136	13.6224	15.6343	4.36885	16.361
ENSG00000267493	6.65262	7.16608	5.95181	7.07875	6.37661	5.83002	6.62165	5.79784	6.14612	5.57168	9.66291	6.02923	6.10967	7.45927	6.74231	7.17393	7.95785	5.7586	7.42686	6.80486	7.39313	6.15549	6.67773	5.82175	6.72569	5.61027	8.27416	5.94278	6.9326	7.56822	6.66716	8.14292	9.07972	7.6686	7.27225	7.08716	7.01909	6.64027	6.07228	7.71382	6.22959	7.94349	6.4892	5.50883	7.57553	7.62576
ENSG00000173950	13.7199	13.2926	13.3027	12.8581	13.729	13.3207	13.8734	13.1178	13.3184	13.0306	13.9854	12.7825	13.6207	13.265	13.1364	12.9007	13.5035	13.4319	13.7367	12.694	13.3907	13.1737	13.7748	12.6726	13.1423	12.8247	14.3469	13.3033	13.1807	12.5109	14.364	12.8208	13.8035	13.743	13.0086	12.9741	12.0666	13.3448	13.1639	13.1823	13.6789	13.1292	14.4648	14.54	14.0701	12.8382
ENSG00000224043	6.04632	6.2181	6.89225	6.50327	7.7689	7.24241	7.11817	6.22917	6.56801	6.10187	6.90906	6.30679	7.39724	6.51649	6.05952	8.22777	6.86724	6.91818	7.22108	6.34563	5.71479	7.75159	8.02476	6.9976	8.02645	6.41514	6.81418	6.73324	6.74473	6.54906	6.51014	6.23448	6.68498	7.41702	5.17715	6.07325	6.01532	5.95527	6.70668	6.04148	5.48082	7.07641	5.31629	7.3598	6.22468	6.31757
ENSG00000150893	9.41867	13.1951	12.2696	9.05538	2.63498	8.01907	14.2968	8.50594	13.9504	12.1369	4.1575	9.44793	9.58564	8.87069	11.0502	10.1627	12.5805	11.386	11.903	7.56322	6.75017	9.21506	11.9993	7.6242	7.08626	9.15901	2.63498	10.9729	4.85479	8.39	12.5807	7.88316	6.41058	7.73182	2.63498	9.21365	7.90611	9.02211	7.93821	10.1497	13.2827	13.532	10.3155	13.293	13.1524	12.6866
ENSG00000172432	16.0679	15.9335	16.8068	16.2238	15.0062	16.8899	15.2566	16.7555	16.6624	15.5738	16.0002	17.8458	15.4757	16.3846	16.1377	15.8304	15.6784	15.6921	16.3143	15.8978	15.7356	15.932	16.0466	16.7352	16.4928	15.7446	16.1666	15.9846	16.9359	16.1089	15.7755	16.7267	16.0557	16.8376	14.9604	16.0624	15.9205	15.5712	15.8869	15.3066	16.0359	15.3648	15.9727	15.4506	15.7233	15.4999
ENSG00000136104	14.523	14.2893	15.384	14.0941	14.2816	14.1389	15.235	13.644	17.0586	14.7314	14.6839	13.6052	15.9292	13.7037	15.2301	14.8976	15.4161	14.6985	14.7273	13.4548	14.9179	14.75	15.3843	14.7275	16.6972	14.5524	14.9166	14.5207	15.6759	14.648	15.1432	13.8422	13.8441	15.1352	15.6852	14.3182	14.86	13.9044	15.0971	14.2489	15.2977	13.7432	14.9839	14.3693	14.6703	14.6425
ENSG00000090372	17.4683	17.5317	17.1187	17.4692	17.532	17.3123	17.1934	17.1677	17.7726	16.9327	16.2139	17.5173	17.0619	17.7307	17.3804	16.8604	18.368	16.9938	17.977	17.3142	17.5592	17.3021	17.6039	17.309	17.6486	17.1513	17.4801	17.2824	18.0789	17.385	17.7599	17.4031	17.9227	17.0684	17.327	17.2286	18.1179	17.2206	17.9272	17.58	17.7162	17.1731	17.0555	17.4703	17.222	17.3441
ENSG00000160183	9.55657	6.33749	7.79388	7.07875	10.1868	8.77393	9.62333	7.0538	13.4272	9.22671	13.6136	8.94733	8.5374	7.6664	11.2168	8.85882	10.4967	7.49248	13.5838	9.44417	13.2731	8.21094	13.2949	9.53908	13.994	9.28732	11.2443	7.70424	9.88392	8.22119	8.76787	9.18689	11.5492	7.6686	10.7678	7.93932	13.0253	8.56419	12.7508	7.18987	12.7418	9.69968	11.569	5.3037	9.6011	8.97287
ENSG00000129911	15.2724	14.4004	15.0342	15.8636	15.0329	15.2331	14.0544	14.5363	15.0966	14.1226	15.1112	15.2098	15.6507	15.2812	15.3935	13.6296	15.4562	13.7427	15.6532	13.9269	15.3832	13.7604	15.651	14.1289	14.8481	13.2213	15.6333	14.1246	15.8875	15.1296	16.2072	14.7421	16.117	14.2439	16.535	14.6527	16.6787	14.7497	16.1751	16.4825	15.2646	14.4727	15.1035	12.6097	16.009	15.3574
ENSG00000157399	17.0964	14.2727	18.0538	15.444	14.8945	16.5607	15.9364	13.3686	15.7602	14.3517	15.201	15.2667	17.5235	16.4901	13.7585	14.1209	16.0182	15.4431	16.0535	15.0494	17.8652	15.2069	16.4788	16.7512	16.0288	16.8342	15.7832	14.8708	15.6544	14.9243	15.1742	14.7541	12.86	13.5553	15.6185	16.2841	17.0876	15.4822	5.78423	7.3288	17.6654	15.3266	15.6941	11.9722	13.6732	14.9416
ENSG00000140391	19.6381	20.8091	19.9946	21.413	20.8263	21.7741	20.3941	21.6089	21.2827	21.2754	21.8881	21.8554	19.8561	21.4584	18.1988	20.3381	19.5365	20.4917	19.6499	21.1753	19.4938	21.3695	20.2621	21.9747	19.8587	21.4168	21.2154	20.4077	19.7148	21.452	20.2684	21.3413	20.6454	20.8034	19.9347	20.6107	19.8444	20.6697	20.8235	20.7136	19.6355	19.7759	19.7821	19.096	19.3222	21.0002
ENSG00000101544	14.466	14.8749	14.293	15.0564	15.2402	14.8094	14.9562	14.6534	14.2822	14.9729	16.5943	15.1421	14.3452	15.0658	14.3874	14.5546	14.5853	14.8435	14.1319	14.8034	14.6043	14.7049	14.6837	14.469	15.0459	14.9543	15.7134	14.4577	14.9877	14.5704	15.0496	14.8303	15.9742	14.7845	15.313	14.5612	15.0527	14.7086	15.5235	15.4158	14.3694	14.7604	14.2157	15.2092	14.4465	14.8178
ENSG00000234807	4.35795	5.35169	3.41397	5.8287	2.63498	4.84174	3.15733	5.17184	3.38318	5.25101	3.42225	5.3399	3.39984	4.45227	3.67832	5.41161	4.46372	5.7586	3.36645	4.62871	4.68784	5.46048	3.44009	5.28178	3.4298	4.81051	2.63498	5.15212	2.63498	3.89524	3.38979	6.0293	4.24017	4.17762	2.63498	4.12507	4.05019	3.68032	3.86804	4.43938	3.27072	4.56103	3.7173	6.26458	3.82749	4.44914
ENSG00000065923	11.8268	11.2466	11.775	10.8566	14.4141	9.79513	13.637	10.2812	9.59687	11.6261	13.4847	10.5513	13.8311	10.2764	13.3968	10.5278	13.0056	11.373	9.69073	12.694	15.417	10.7452	13.3901	9.95934	13.5609	11.4131	13.5905	11.3423	12.9815	11.2583	10.7407	10.5209	14.8618	8.43726	13.2589	10.7844	12.6389	9.64712	11.7716	10.2737	10.7873	11.6498	12.122	10.7187	14.0281	10.9759
ENSG00000091592	13.0627	13.7524	12.5155	13.1826	18.6764	12.5179	10.2826	12.3687	13.3825	14.0454	14.2577	13.3562	10.9051	13.502	15.6895	13.1713	13.0088	13.577	12.1062	13.9721	11.6476	13.3589	11.8021	12.4881	15.1731	13.8602	10.1415	13.8515	12.0265	13.064	12.0479	13.7743	12.73	12.0281	10.087	14.3799	10.535	13.4403	12.7072	13.7034	12.5619	14.6218	13.864	14.9234	14.4229	13.3136
ENSG00000261732	7.14653	7.15317	6.17376	6.67563	6.08584	5.13096	7.88879	4.43387	5.06529	5.94628	9.11047	6.79951	6.44365	7.22629	6.83841	6.47633	6.8133	5.85486	7.6008	6.78223	5.521	5.60756	6.46629	4.8286	7.73696	6.11447	6.16213	6.03061	7.12974	2.63498	7.55389	6.11496	7.61502	2.63498	3.9158	6.39806	5.7779	6.88933	7.61631	5.35585	7.91219	6.74306	6.61637	5.68754	5.74476	5.21943
ENSG00000182983	11.192	12.0912	9.3061	10.7903	6.95709	10.6104	7.5576	11.4765	11.329	11.4925	8.7077	10.2502	9.48667	11.1566	10.7848	10.3293	8.1582	11.3188	7.61889	11.4061	11.7053	10.6172	7.69204	10.826	9.22688	12.1305	4.52103	11.2002	8.14441	9.66505	8.92846	12.2406	7.64605	9.38931	4.73628	11.3443	11.9432	11.2921	7.6912	10.4075	12.2155	11.1405	9.50152	12.5706	8.78424	11.241
ENSG00000138617	12.4914	13.5242	13.4373	13.359	12.3769	13.2714	12.8065	13.3222	14.2127	13.5259	13.2736	12.7338	13.6644	13.3119	12.7179	12.8913	12.8812	13.3812	12.484	13.38	13.952	13.4255	13.9473	13.5295	12.5604	13.6493	12.7569	13.6273	12.6638	12.8408	13.8416	13.5714	13.0668	13.4683	14.1403	13.1619	13.4494	13.2669	13.2455	13.1951	13.8017	13.6588	12.9038	14.3194	13.3939	13.4037
ENSG00000171658	7.79113	8.80183	8.05284	10.363	8.34926	10.4912	6.76005	10.1234	9.95201	8.93695	6.02059	12.2827	6.20079	12.0221	7.93806	8.65575	5.84081	8.60231	9.31737	10.2511	7.55157	9.58125	7.59157	10.0027	7.55591	9.28732	7.16819	9.13056	6.9326	9.50047	7.41357	11.1323	7.52328	10.5375	6.11591	10.6921	4.33798	10.305	7.55592	9.95995	6.4286	8.36886	7.73333	6.83232	4.78071	10.2359
ENSG00000106477	13.6952	12.3017	13.5106	12.107	11.2085	12.2237	13.9714	12.1484	12.6511	12.4618	11.9128	11.916	14.3762	12.2933	13.3444	12.5461	13.4708	12.3786	13.319	12.4663	14.5395	12.4173	13.6019	12.1724	13.5184	11.7988	13.5102	12.9292	13.821	12.266	14.572	12.0221	10.5957	12.3884	13.0518	12.2005	12.7898	12.7469	12.2794	12.6678	13.728	12.752	13.9619	13.2467	13.256	12.3627
ENSG00000033030	14.2638	14.3501	14.243	14.6073	15.0387	14.4549	14.365	14.646	13.3825	14.3564	14.8053	14.4567	14.5141	14.5644	14.4247	13.9146	14.4279	14.0139	14.2734	14.6188	14.0189	14.3444	15.2956	14.3609	14.7688	14.7027	14.6702	14.2405	14.7269	14.3051	14.5478	14.7645	14.867	14.7326	15.5951	14.1773	15.4222	14.4175	14.8287	14.5852	14.3829	14.2565	14.1183	13.9391	13.8958	14.3032
ENSG00000168237	13.6952	12.5352	15.6198	15.0513	14.6768	15.8837	13.053	15.059	15.2795	13.6895	13.8159	15.7814	12.7287	14.7751	12.888	13.1713	14.8778	13.9794	13.1436	13.8226	13.9179	13.7245	15.3443	14.5374	13.4401	13.3087	16.5988	14.0101	15.7021	14.5227	14.5372	14.7368	13.0882	15.6165	13.7961	15.1679	13.1075	14.9707	14.7344	14.425	14.8977	13.6465	14.4289	11.411	14.1772	13.7862
ENSG00000215187	5.37097	4.98297	7.50031	4.52178	6.89742	4.52272	5.50224	4.78045	4.94575	5.70796	6.14275	4.2946	3.93128	5.19529	4.95275	5.41161	4.77552	6.5419	4.7259	4.96021	6.33299	7.79448	6.032	7.25186	4.25585	4.32702	6.62804	7.37882	3.99579	4.75396	5.76371	5.53145	5.28967	6.85996	5.845	6.49173	4.33798	4.94278	3.86804	4.13738	4.64245	4.56103	6.04151	8.57523	5.89927	5.04114
ENSG00000170275	17.9229	19.5272	18.2654	17.2822	17.4826	17.6383	17.6661	17.329	18.2517	18.9318	16.6618	17.1398	18.5641	17.5829	18.72	19.2142	17.4546	19.4246	18.1631	17.5447	18.1842	18.5709	18.1705	17.8925	17.6218	18.7673	18.1633	18.7505	18.3652	17.9773	17.491	17.4658	16.0557	18.0482	17.094	18.2627	18.2948	17.9441	17.9291	17.9301	18.1972	19.5268	18.3982	20.6437	19.6375	18.5722
ENSG00000163071	11.426	11.8651	13.3322	12.8689	10.3957	12.8526	10.4457	12.5579	8.79632	12.1099	14.6098	11.0338	8.30435	12.0828	10.8005	10.454	10.2381	11.3041	10.7334	11.9001	12.8745	12.4574	10.6017	12.2558	9.89788	11.8938	11.9946	11.8878	9.28788	12.2197	9.60318	12.0787	12.8011	12.0357	10.4962	12.5511	13.3582	12.6764	11.7716	11.9527	9.78383	11.2796	13.3809	11.7354	11.3228	12.2211
ENSG00000089163	6.73017	8.45343	7.27655	6.42806	8.6581	9.09987	5.83353	7.44369	6.14612	8.52026	6.66048	5.72652	6.54423	7.34749	7.29925	8.92518	6.10469	9.13463	6.0904	7.9193	6.15528	8.85905	6.75958	8.36169	7.503	8.96388	9.21931	8.03412	6.12661	7.66121	6.07716	7.11805	5.64315	7.19128	6.76489	7.30858	4.82376	7.4848	6.63825	4.68114	6.07957	8.20615	6.4892	9.89832	7.92595	7.12303
ENSG00000197180	9.86993	9.44394	10.0073	9.40194	10.551	9.87253	10.0649	9.10369	9.16819	9.91699	7.288	9.69931	10.8432	9.63096	8.54339	10.5709	9.88636	9.68336	9.33752	9.18944	10.8654	10.7784	10.4024	10.8988	8.10964	10.1528	9.58329	9.6647	9.08947	9.14703	9.12332	9.1114	8.50912	11.1365	10.1059	9.33718	9.1522	9.7174	7.73542	9.44108	10.8121	10.2237	10.2312	10.2422	9.98042	8.93008
ENSG00000123384	21.0783	21.6199	19.8744	21.2885	17.8556	21.4579	20.0359	20.4447	19.3204	20.3977	19.143	21.8857	21.336	20.9982	22.32	17.8206	20.1705	20.3185	21.6306	20.5545	19.4468	17.8628	19.6911	19.2727	19.8228	19.1583	17.7895	20.9014	20.306	20.1503	21.1142	20.484	19.4356	17.0403	19.1415	21.0435	16.7394	22.0084	20.2314	21.1966	20.7796	21.7791	20.7818	21.7157	20.9194	20.9037
ENSG00000066654	16.2815	16.046	15.7248	15.6603	14.851	15.8769	17.6181	16.4275	15.611	16.2654	16.1224	15.8347	16.5035	15.7925	15.6526	15.9768	15.6793	16.3098	15.6112	15.8601	16.0386	15.9701	15.5976	15.7813	15.4808	16.2252	16.1764	16.004	15.9506	15.6782	16.4011	15.8812	16.1319	15.9089	16.5542	15.8247	16.3049	15.8932	15.6193	16.063	16.3174	16.1652	16.3835	16.7217	15.943	15.9157
ENSG00000162733	16.06	19.7131	14.5263	14.9078	13.8581	16.1546	15.9436	16.1644	14.6484	18.9019	15.5615	16.4559	15.7903	15.9327	16.3542	18.7515	14.6785	18.5218	15.1725	15.6151	13.903	16.174	13.4812	14.7656	13.9596	16.9163	11.2675	18.2436	12.7791	16.4092	14.8979	15.1913	13.8314	15.6206	13.318	17.8254	10.1894	16.6197	15.0446	16.939	15.292	19.8182	17.2067	20.5847	17.8041	18.6156
ENSG00000106868	14.3013	13.6951	14.6216	14.5042	13.3916	14.6473	15.6293	14.437	14.7477	13.6571	13.7449	14.2356	13.9527	14.2952	14.28	13.5242	14.2608	13.5582	13.2268	14.2222	15.2011	13.6361	15.3469	14.2553	13.7505	13.6058	14.2941	13.5224	13.5129	14.458	13.4678	14.1476	12.5248	14.1283	13.3715	13.4491	15.6196	14.484	14.184	14.5435	14.1418	13.8299	13.6669	12.1392	13.3165	14.1567
ENSG00000280106	8.83732	7.98582	7.70037	8.05532	7.56065	8.79893	11.8151	9.5304	9.42284	7.90416	8.3865	8.01274	9.11574	7.17105	8.71826	6.09181	8.64761	6.80339	9.14724	8.26278	7.65493	8.09813	8.77862	8.97707	9.2973	8.51308	8.36609	8.45171	8.94456	6.96441	7.3065	7.17859	7.95357	6.36107	10.9176	7.14579	10.3471	8.2047	8.35782	8.60019	8.48877	8.24731	9.50152	7.025	9.69269	6.72447
ENSG00000186710	3.48403	4.71537	4.63124	4.52178	5.00647	4.01399	3.15733	4.61897	2.63498	2.63498	6.73968	5.16157	3.39984	5.6445	3.83156	2.63498	5.12137	3.72101	2.63498	6.45003	5.74041	4.14275	5.68306	6.56112	6.41696	4.5573	5.26947	4.37594	4.49917	4.97228	4.39405	3.88375	4.4612	2.63498	5.97184	5.14805	7.52142	4.08417	5.078	4.34702	5.86652	4.81459	5.0549	2.63498	5.63879	4.97605
ENSG00000033170	15.7666	13.8633	17.3811	14.5175	16.9483	14.4884	15.6612	15.19	12.8856	14.4546	17.3389	14.1797	15.0136	14.0276	15.699	14.676	15.0036	14.828	13.5398	14.5	17.188	14.6377	15.3063	14.6986	15.0367	14.8578	17.5125	14.6201	14.9985	14.8587	15.7441	14.2193	16.1636	15.2998	16.4536	14.0062	17.198	14.6178	15.7748	14.404	13.7753	15.1703	15.8933	13.9936	16.1706	14.0408
ENSG00000005022	21.2423	20.9205	22.1133	21.9395	22.8942	22.6093	21.3973	21.9755	19.9382	21.5756	20.6933	23.0048	21.6892	21.7814	19.7631	21.8146	20.2223	21.5144	20.9832	21.4166	22.4282	22.1167	22.242	22.2207	21.8006	21.2494	22.6425	21.7546	21.9672	22.3316	22.4499	21.8476	20.5783	23.0605	20.0015	21.3627	19.9402	21.1522	21.876	21.634	21.4267	20.6899	20.6071	20.1408	20.5863	21.5973
ENSG00000227375	4.84786	5.94423	4.84329	5.72694	3.6716	6.28034	3.88227	6.42726	6.40221	6.52383	5.16996	5.88598	3.70469	6.06746	4.41691	5.82246	4.0436	5.54367	5.56987	6.50644	6.50585	6.59222	4.90674	6.09265	2.63498	5.99824	7.08392	5.6777	4.27445	6.38357	2.63498	6.75666	4.24017	8.47995	4.73628	6.41182	6.23948	6.22742	3.65154	5.48268	3.94867	5.33281	5.31629	4.59158	4.97294	6.25249
ENSG00000151651	14.4227	11.0487	14.3438	13.1579	16.9588	12.2906	10.5508	11.4428	12.9157	12.6338	12.6435	11.9878	11.4413	12.499	15.4266	11.8659	13.2792	11.2904	11.9959	12.5585	12.345	12.0102	13.008	12.9409	16.8228	11.9642	11.3894	12.2797	12.5811	12.9898	12.8959	12.4903	15.6456	11.6576	13.2331	11.6835	12.3922	10.7637	14.7628	11.6199	10.9703	11.6816	13.4432	9.17814	15.7011	11.2339
ENSG00000164061	8.03609	10.3628	6.33265	7.13486	5.22233	7.49	6.54708	7.0538	7.22593	9.0263	8.46603	8.1276	10.4769	8.2973	7.87338	7.99385	7.43543	9.71537	6.72603	9.44417	6.33299	6.43007	6.67773	6.49297	7.2695	8.65307	6.0172	8.72818	5.99707	7.41995	5.9802	7.78933	8.09141	5.9667	8.22121	10.7844	6.13182	8.9494	6.8446	8.56319	7.44814	10.3173	7.82365	11.7159	9.33541	8.93008
ENSG00000205795	11.489	14.1482	9.76883	10.9392	8.18051	11.651	9.08573	10.7589	10.1031	13.999	6.48758	11.2947	10.5866	11.9016	10.0024	13.823	9.24343	13.9446	10.723	12.0089	9.07036	12.4673	9.44765	11.7718	9.36444	12.0459	6.16213	14.0565	8.0903	11.2338	9.97765	12.2577	7.19274	11.9252	6.8656	11.1343	6.13182	9.59247	10.3375	11.6467	10.2719	12.7231	11.1622	15.7756	12.3392	11.5342
ENSG00000258938	6.09427	5.15337	7.79388	5.68408	5.91457	5.22519	5.47527	3.94548	5.20977	5.1084	5.31824	4.62097	4.85614	6.16553	5.80321	5.41161	5.70777	5.70788	4.94225	6.12876	6.41416	4.68799	5.46954	5.8586	4.88183	5.3667	4.4254	5.78304	5.13419	4.07623	4.96304	6.23448	4.64841	4.28956	5.0057	7.01708	5.74887	6.19401	5.042	5.95764	4.9138	6.54195	5.38263	5.60104	6.32299	5.42587
ENSG00000223839	10.0837	11.0974	8.90944	13.2392	6.54199	9.36053	7.10958	11.9254	5.02661	11.195	5.0893	12.7364	7.47911	13.5238	9.33723	9.82686	8.41155	9.22636	10.7472	12.4046	8.46684	10.2765	8.22479	9.86854	10.4187	8.15226	6.89891	10.7401	8.82663	9.76612	5.53548	13.2048	11.0461	8.73913	8.31893	13.2324	6.58738	12.0673	6.60277	12.139	8.14255	9.99974	8.79035	10.1289	7.16891	10.8608
ENSG00000198642	15.3575	16.0326	16.3019	16.1388	15.9387	16.222	16.9369	16.0993	16.6524	16.0384	15.5207	16.222	14.9529	15.1932	15.8259	15.8587	15.9248	16.1326	15.4145	15.8463	15.7682	15.9497	15.9341	15.7634	15.5983	16.0693	16.8241	16.0793	15.5828	15.6493	14.9955	15.9298	15.888	15.8581	15.7196	15.6095	16.4215	16.0985	15.8642	16.2615	16.3935	15.7667	15.2487	16.4094	17.4469	15.6585
ENSG00000105270	13.5806	17.499	12.696	12.6943	13.0559	13.7146	11.7969	13.4437	12.1509	16.7931	12.6111	13.5971	13.6482	13.7392	13.7127	15.7347	12.7739	17.5997	13.3369	13.0438	11.9285	15.8894	11.788	12.4341	11.9808	14.5444	9.82485	16.5605	11.0364	15.036	12.3033	12.9147	11.2107	12.6391	11.0336	16.3808	10.3918	14.3563	13.503	13.7362	13.4163	17.3787	14.3569	19.6436	15.3851	15.7588
ENSG00000074800	22.599	21.7174	23.5429	21.8143	22.5642	21.9532	22.4258	21.379	20.7302	21.3086	23.1472	21.5898	23.059	21.6824	21.5135	22.2008	22.4348	21.7175	23.0549	21.56	23.5193	21.256	23.1299	21.3738	22.4212	20.9696	23.8261	21.5495	22.872	23.236	22.8835	21.0617	22.9579	21.9576	23.6379	21.8496	21.7186	21.7199	22.6179	22.0678	21.5331	21.91	22.0597	21.7449	22.3371	22.3157
ENSG00000122483	10.0297	9.29652	10.4525	9.86501	10.0579	10.3057	12.812	10.3766	8.66885	9.77527	11.5019	10.0212	11.3641	10.3098	10.4003	9.59123	10.8359	8.31526	11.3364	11.1648	12.4092	9.13156	10.7971	9.63665	11.9508	9.22971	10.5179	9.47356	11.0698	10.2547	11.4752	10.3627	12.6277	10.6077	9.02399	10.8124	11.7677	10.7024	11.147	10.3408	10.7952	10.1168	10.2734	8.02407	9.73449	11.0179
ENSG00000145214	17.0158	15.6858	15.5196	17.3233	13.9437	17.4598	13.6801	16.9236	17.3759	16.0258	15.4366	17.3501	14.0427	17.7167	14.8993	14.1364	16.8284	15.8168	17.1784	16.426	16.303	16.3444	16.339	16.2435	16.0627	15.8861	16.7735	16.5947	15.3916	16.1114	15.3102	17.5958	16.2346	16.8276	15.3161	17.2313	16.5435	16.7169	16.2148	16.5795	16.0558	15.6811	15.7215	14.3277	15.2019	15.9919
ENSG00000144320	15.445	15.7545	15.9182	15.8234	15.4481	16.9246	17.7264	16.6016	15.198	15.7694	16.1126	16.618	16.1202	15.4837	15.0729	15.5745	15.9153	15.4138	14.9127	16.2124	15.7034	15.6709	15.9729	15.7921	15.5317	16.2144	16.2141	16.0186	15.405	15.503	15.4705	15.6999	15.9203	16.3572	16.3078	15.93	16.2654	16.0128	15.866	16.2123	15.3854	15.3361	14.7454	15.4359	16.0252	15.5457
ENSG00000134240	19.1271	20.4065	20.6038	22.9072	13.1408	23.4401	14.546	22.6299	5.3712	21.545	14.6396	23.3476	18.2962	21.6239	12.755	16.7708	12.1345	22.0711	17.0795	20.4779	17.0682	21.4497	17.1626	20.8588	16.8669	22.6914	13.9003	23.097	17.6817	20.5379	16.1915	22.2194	17.5653	22.5206	14.9697	21.8112	18.3867	21.495	16.3222	22.6152	19.0641	18.3095	16.5326	18.0564	14.314	20.6055
ENSG00000005483	17.2505	17.874	16.2885	17.5071	16.6995	18.0402	18.1224	18.5337	17.0243	17.5408	18.3616	18.5723	17.5995	17.8291	17.8595	16.665	18.6618	17.306	17.174	17.8976	17.4027	16.9899	16.6578	17.2671	17.4348	17.4695	14.9925	17.289	17.5278	16.9346	17.9921	17.7526	17.916	16.2483	17.1015	17.4558	17.4372	17.71	17.4522	17.6294	17.5125	17.2377	17.1226	18.0306	17.2507	17.7073
ENSG00000231651	3.81956	4.16424	5.18636	4.99306	4.5981	5.13096	5.44777	4.43387	4.61574	4.6312	8.74006	4.88011	3.39984	3.95963	3.67832	4.09267	4.46372	4.78812	4.57632	5.25924	5.33026	4.68799	4.27534	6.37161	2.63498	4.32702	6.62804	5.15212	4.59779	5.60461	3.38979	5.09041	4.24017	6.574	3.9158	4.33331	4.33798	4.76471	5.042	5.77336	4.78518	4.56103	4.43487	3.61094	4.67283	5.16257
ENSG00000152256	13.099	13.9094	15.8187	15.458	14.9816	15.0416	15.573	15.9431	13.1497	13.9344	16.6172	15.2546	14.1226	14.2778	15.1328	15.1763	14.356	14.685	13.1131	14.7653	13.7777	14.7381	14.1272	14.955	14.2787	14.1064	15.2699	14.2663	15.236	14.8764	13.366	15.6063	15.1961	16.2675	14.5629	13.4379	12.9786	14.9069	14.5748	14.9483	12.7253	13.4588	14.1995	13.111	14.7883	13.8374
ENSG00000197261	11.4166	9.36235	12.4167	9.87091	8.68475	9.66791	10.1541	9.85073	6.85116	8.9024	9.87878	9.92243	9.96938	9.47083	9.79857	7.8927	7.43543	8.147	12.8566	8.49558	12.0886	9.21506	9.06198	8.90492	11.4075	9.4074	2.63498	8.72818	12.2283	8.42222	11.0138	9.8618	10.292	9.7857	11.1192	10.2104	7.41589	9.55539	10.3738	11.5834	10.4551	9.0566	9.28775	7.84099	4.57948	9.16085
ENSG00000088280	13.7862	14.5635	12.0461	15.5144	13.7589	16.964	11.7942	16.3511	10.2429	14.8718	13.3739	16.1	13.2119	15.8255	13.7623	14.5923	12.8677	15.2656	12.6683	15.0193	13.6302	15.319	12.7395	15.2719	13.0094	15.9091	12.6829	16.0858	11.364	15.2843	11.3786	15.5	13.8099	16.2675	14.7969	16.1898	14.6323	15.8752	12.3939	16.1974	12.3611	14.8035	13.8689	14.6118	13.9104	14.9613
ENSG00000143515	14.6206	15.9888	13.2558	14.7084	13.4613	14.4196	12.9071	14.0827	12.7795	15.1758	13.1053	14.5843	13.352	14.247	16.0735	14.3304	13.9133	16.0432	13.6284	14.8699	12.7446	14.0974	12.7487	13.7002	12.9898	14.3885	11.1976	15.196	12.3764	15.1333	13.6282	14.8271	13.8035	14.1313	16.5437	15.208	11.5136	15.6075	14.7524	14.626	13.9098	15.8542	15.016	17.2505	16.0269	14.8193
ENSG00000147324	15.6242	17.0993	15.6012	16.3535	16.1272	16.3968	15.9026	16.5073	15.9308	16.2307	15.9952	16.0012	16.2867	16.7115	16.5664	15.6543	14.6955	15.918	17.4972	16.8527	17.2926	16.308	15.3312	16.1653	15.9673	16.7355	16.5594	16.1169	15.9038	15.9143	17.9926	16.4165	17.6738	15.3067	17.0673	16.0001	16.3801	16.6012	15.8004	16.5187	16.0439	16.3741	16.2196	16.8227	16.585	16.4576
ENSG00000136826	17.1462	20.05	17.1392	20.6707	16.9184	20.3225	13.4727	20.8361	13.4881	20.3079	18.3163	21.3828	15.0063	21.4408	14.9994	18.8171	16.3682	18.9294	16.719	19.9061	17.1976	19.603	16.4205	20.2258	16.4301	19.583	18.4146	20.3432	17.1912	20.8843	14.9213	20.8783	19.0592	19.7353	17.17	19.8341	20.1707	20.0184	16.6037	20.7717	15.1686	18.2414	15.7592	16.7542	16.8914	20.2926
ENSG00000197361	8.37619	13.8552	8.52215	8.45481	7.74657	9.86663	8.381	9.83781	9.08439	13.3072	8.42681	9.29138	9.82334	10.2937	9.71658	12.9728	9.0163	14.3736	7.83547	9.3185	8.01229	12.3836	8.95059	9.14861	7.44808	10.3242	8.22917	13.0891	7.1143	10.5273	8.40658	8.85166	7.81028	9.24829	8.06097	11.4165	8.00034	9.78303	8.67395	8.06442	9.55961	14.4521	8.83154	16.551	11.1058	12.007
ENSG00000106733	12.9461	12.5589	13.6013	13.9572	13.8247	14.5778	13.2224	14.6387	13.6372	13.9626	12.8584	14.3091	11.1635	13.3709	14.5118	14.2344	12.6343	14.0809	13.8282	13.6508	13.3969	14.471	12.9305	14.6131	13.7118	14.3091	14.1123	13.2868	12.9217	13.9427	12.7484	14.2489	13.5116	14.5175	11.6262	13.6258	13.96	13.6827	12.9481	12.9812	12.5043	13.4588	12.7212	12.5967	11.8802	12.2211
ENSG00000226380	9.24264	7.45593	11.4475	7.48847	9.74414	6.09758	13.7205	7.55325	9.14442	6.96112	14.7689	7.95169	7.83609	6.76104	9.62862	7.02871	7.65028	4.4406	7.92055	6.80486	9.04524	4.84369	7.12104	6.37161	9.79173	5.99824	9.89235	6.73324	11.2068	6.0377	9.14787	7.42332	8.39813	6.11067	7.54914	6.77303	8.00034	6.78145	7.46032	7.82746	7.04729	7.34678	8.60594	5.50883	4.78071	7.07136
ENSG00000255568	5.65555	5.8179	5.32998	7.24089	6.12124	7.02186	4.91049	5.47516	6.56801	6.61236	5.63131	6.77952	5.29054	5.72442	4.95275	6.31808	5.74709	6.25708	6.00053	6.94383	6.82315	7.09288	5.79188	6.60482	5.37375	6.60126	6.81418	6.4461	5.69578	5.47164	4.63125	6.32695	6.17422	7.02797	5.845	6.84565	7.47839	6.92018	5.78423	6.39942	5.57828	6.11982	5.56447	5.68754	7.15759	5.62636
ENSG00000130037	5.91883	10.1733	5.46	6.34866	5.04493	7.67439	4.86859	9.09647	4.94575	12.4018	4.81332	9.51876	6.26971	5.91767	6.39826	9.66665	4.92482	11.9235	5.29172	6.11062	3.9544	8.66154	4.74789	4.66449	4.72421	8.59473	6.21619	10.6491	6.52845	7.23862	5.12093	8.09144	4.92185	8.24645	3.55502	12.0728	6.97016	9.71009	7.53104	10.1836	7.78557	9.99522	7.8178	13.5458	7.16138	12.0035
ENSG00000126733	3.48403	5.94423	6.8228	3.34349	3.37568	5.72824	3.36977	5.17184	6.85116	5.05733	3.42225	5.16157	4.19886	4.23212	3.67832	6.41902	3.31927	5.35747	3.65893	5.25924	3.9544	4.84369	3.44009	4.8286	2.63498	4.5573	2.63498	4.98177	3.61437	3.37772	3.38979	3.99511	2.63498	5.17272	2.63498	7.20213	2.63498	3.90231	3.65154	6.50121	3.52706	6.32728	3.94625	5.3037	4.1131	4.44914
ENSG00000260300	7.16895	7.68817	7.40864	8.29894	7.76335	8.80141	8.43692	7.6152	7.77462	7.12624	6.3926	6.73868	7.44987	7.48967	6.80952	7.71446	6.76675	7.91294	8.35742	7.96511	7.32787	8.19731	7.12104	8.06711	5.62485	8.0575	7.6308	7.60373	6.64067	8.0018	8.14354	8.13786	6.34876	8.74788	6.14304	7.19421	6.72665	7.51874	6.67287	7.83524	7.8173	7.75649	7.05545	7.6312	6.97609	7.95354
ENSG00000269399	8.03609	5.94423	9.2848	6.95951	7.13978	5.72824	6.80337	7.19584	8.97841	6.21965	7.69722	6.15932	7.54969	5.96211	8.51913	6.20944	8.91141	5.94496	8.07262	7.40962	8.0979	5.57936	8.30399	6.23895	9.79173	7.1376	7.60082	6.64378	9.01677	5.22811	8.19585	6.32695	8.59108	5.54599	6.11591	7.40769	8.41952	6.7126	7.81485	6.17106	8.76774	6.60689	8.19238	5.3037	7.57553	5.62636
ENSG00000230724	14.1592	13.1255	14.1698	12.598	12.7037	11.7556	11.9518	12.4231	11.9839	11.5058	13.6764	13.03	12.6816	13.1428	14.3806	10.9131	15.1664	11.4242	12.9417	12.5077	13.7895	11.248	13.6917	11.9978	15.397	12.2918	11.0381	12.1083	13.1325	11.3762	14.6008	14.3489	13.8197	9.95787	11.8748	13.9372	14.4866	13.0017	12.1232	12.5495	14.5966	13.0722	12.2483	12.2386	12.8847	12.4038
ENSG00000075643	13.0627	11.5454	12.3182	12.452	12.3083	13.3063	11.9806	13.0315	11.5287	11.8859	13.7639	12.5742	12.8843	12.5281	13.0235	13.622	11.8669	11.8088	12.4883	12.3092	14.0094	12.0225	13.7244	12.3431	12.9458	11.458	14.796	11.6827	14.1817	13.3337	13.6736	12.5408	14.7604	14.0452	13.2288	12.4224	13.9195	13.2984	14.0607	13.2741	12.9043	12.8403	12.6773	9.48503	11.7543	12.7084
ENSG00000256210	3.81956	4.98297	4.79344	5.90513	5.6962	6.35007	7.11817	5.64578	4.44327	5.25101	4.3199	5.3399	4.02797	4.51759	5.13229	5.66566	4.77552	4.13843	4.98157	5.19044	4.51061	5.10889	5.04855	5.10585	3.86963	5.54492	6.10592	5.56378	5.41789	5.92115	6.95782	5.86565	5.70423	5.70066	5.0057	4.19874	5.2625	5.13632	3.766	4.52526	5.11267	3.79955	4.83125	3.99118	4.57948	5.78322
ENSG00000131165	18.6425	18.4489	17.7061	18.9507	17.2605	18.8849	17.5444	18.2549	18.1025	18.2396	17.1712	19.225	18.6684	18.3155	17.4766	18.1046	17.472	18.332	18.3772	18.2989	18.3176	18.5474	18.3516	18.4867	18.2229	18.0479	17.9952	18.4366	17.5187	18.3893	18.8385	18.3226	17.8758	19.0532	18.2556	18.6119	17.9597	18.2885	17.947	18.6986	18.4638	18.0359	18.6853	17.6864	17.6548	17.5788
ENSG00000179546	11.5419	4.98297	11.7472	6.77999	14.4816	5.83002	7.79557	3.94548	7.38945	4.89127	12.8105	4.62097	8.27134	4.8514	8.32666	5.04906	8.2855	6.6786	12.6724	6.16435	12.4067	5.46048	10.7253	6.89591	13.157	4.97257	13.4467	5.15212	12.6949	6.38357	12.0306	3.99511	11.7439	6.75929	15.6365	4.12507	7.70434	4.61308	11.4982	6.68532	10.9395	6.32728	11.9346	5.98843	6.98466	8.67263
ENSG00000062524	10.2904	12.5998	10.6166	13.9423	11.4171	14.4008	4.73418	14.3454	6.64422	12.88	12.6609	16.4579	6.70174	15.3596	8.02524	11.0295	6.41447	12.2588	8.3788	13.1755	11.6981	13.6643	12.4987	14.4221	13.9143	14.5162	6.29363	13.021	12.1177	11.572	14.4055	14.931	11.9486	12.7887	13.0326	12.2108	12.9999	11.2674	12.7508	12.5846	7.6423	9.57188	8.41006	10.7962	8.48891	11.3342
ENSG00000273888	5.20319	4.71537	4.84329	5.49813	5.71963	5.13096	5.41972	4.43387	4.37998	5.25101	7.61581	5.72652	5.672	4.8514	5.17949	6.77897	4.77552	5.94496	3.36645	3.91316	4.68784	5.0262	5.25605	5.82175	3.9799	5.73245	5.04317	6.21659	3.61437	4.36832	4.96304	4.49829	5.74352	5.70066	5.55079	5.18139	3.47336	4.76471	5.042	4.13738	3.52706	5.87677	5.17312	6.51928	6.8362	5.16257
ENSG00000272264	6.16329	7.58635	6.95848	8.22345	7.19861	7.833	4.58416	8.3569	4.167	6.96112	6.66048	8.70471	4.80864	7.6664	4.41691	7.50186	5.74709	5.7586	6.00053	8.00464	5.33026	7.16009	7.42637	7.876	4.47858	7.34085	7.16819	6.54836	6.40667	8.6926	5.76371	8.14292	6.33606	7.48153	10.5118	7.25634	7.41589	8.13207	6.90405	8.27361	4.64245	6.22733	5.31629	4.848	6.17286	8.31848
ENSG00000261136	6.818	5.8179	7.77566	7.50679	6.58051	5.64114	5.83353	7.75014	8.09636	5.42062	8.81487	6.96788	5.90773	6.68407	7.87338	5.5624	9.41123	5.94496	6.83345	7.4603	6.98025	5.71499	7.1816	6.49297	8.64736	7.5189	5.74917	7.37882	7.03455	5.60461	7.33792	6.90753	5.05591	5.41755	4.48957	7.83642	7.41589	6.22742	6.63825	5.11438	8.7596	6.96956	7.23313	5.3037	5.41217	5.81984
ENSG00000089597	21.064	20.3003	20.1465	20.5488	19.4125	20.4668	20.1709	20.2196	20.7989	20.274	19.9587	20.1069	20.9805	20.4543	20.8372	19.354	21.0384	20.3983	21.1097	20.5406	20.7381	19.7083	20.3839	19.524	19.3089	19.9007	20.3018	20.3962	20.6373	20.4547	20.3202	19.9238	20.9846	19.3477	20.4717	19.9682	21.0127	20.8742	20.726	20.5241	20.9805	20.7108	20.4426	20.3357	20.7788	20.7661
ENSG00000058272	16.1406	18.8142	16.2274	15.8889	16.3564	16.0769	17.4261	17.0038	15.4765	18.2262	16.8957	16.6057	16.5881	16.4031	16.4122	17.5242	16.1299	18.3131	16.125	16.4223	16.0894	16.9054	15.6827	15.7294	16.2244	16.4107	16.2512	17.5068	16.0212	16.514	16.387	15.9901	17.0365	16.2555	16.5274	16.8707	16.1426	16.5191	16.1778	16.3624	16.1473	18.056	16.3435	20.3638	16.1208	17.8311
ENSG00000269981	6.2075	4.78756	6.9799	5.39493	5.64813	4.29573	3.36977	6.28133	2.63498	4.94895	6.18124	6.49055	5.81812	4.05815	7.6022	4.38745	7.54961	3.41176	3.15495	5.35637	6.84667	5.06818	6.3825	3.80796	9.1331	5.32813	3.77335	5.30344	4.39202	3.79118	7.72393	7.18844	4.35577	2.63498	3.75282	6.18995	6.5545	4.16483	3.766	2.63498	2.63498	2.63498	4.2938	3.81965	2.63498	2.63498
ENSG00000133422	15.8417	15.3839	15.3997	15.5012	15.9919	15.0248	16.0038	15.0724	15.7748	15.0997	15.7779	14.8933	16.3335	15.4053	15.7635	13.7403	16.0237	14.8217	15.7898	15.1316	16.0295	14.3517	16.1335	14.2385	16.1434	14.7093	16.0083	15.4104	16.0314	14.6629	17.024	14.943	16.2062	13.5377	16.4386	15.1708	16.0688	15.2628	16.0476	15.235	16.0416	15.3396	15.7443	15.4812	16.2421	15.3127
ENSG00000272375	3.81956	4.98297	4.44526	4.84068	3.89192	4.99416	3.97578	5.79784	4.61574	5.42062	4.46271	4.88011	4.19886	5.58857	4.71257	4.38745	3.59405	4.13843	4.90174	4.7812	3.72417	4.68799	3.99655	4.8286	3.9799	4.81051	4.2079	4.71427	3.61437	4.15652	4.78388	5.09041	4.4612	4.17762	6.24669	5.42235	3.47336	5.09978	3.65154	4.43938	4.1362	5.33281	5.01307	2.63498	3.67472	3.58571
ENSG00000166250	13.8846	17.1559	13.6856	13.079	12.5695	13.9588	12.5106	14.5403	11.6839	17.3939	13.4631	14.1029	12.9309	14.0169	14.574	17.2701	12.9639	17.253	13.211	14.0242	12.674	15.2133	11.8722	13.2857	12.5652	14.8183	9.28043	16.8975	11.2068	14.934	12.8611	13.3803	12.2609	14.1674	11.2464	15.5937	7.75569	14.7649	13.5381	14.8249	13.1957	16.9008	14.9766	19.1749	15.0513	16.1668
ENSG00000124731	12.1238	5.94423	14.5354	7.90694	13.0316	8.61405	7.6959	8.12123	9.16819	9.99448	12.8313	6.02923	10.2939	5.19529	13.3877	9.49564	10.3658	7.95647	9.93269	4.7812	7.33619	4.84369	9.67665	5.82175	11.1079	4.81051	10.9329	7.58467	9.76319	9.29933	10.3876	6.41377	10.6252	8.86524	10.9049	5.98359	3.80505	5.3679	12.0681	6.50121	8.22469	7.84634	10.4224	6.26458	10.5994	10.1752
ENSG00000196951	5.91883	5.8179	4.84329	5.49813	3.6716	6.01389	7.10093	6.22917	5.10288	5.70796	5.38677	5.72652	6.54423	6.60273	6.20036	6.09181	6.41447	6.39072	5.90458	5.87267	6.2469	5.95233	4.27534	7.33185	6.0006	5.73245	4.2079	5.6777	2.63498	6.128	3.69094	6.0293	6.86319	6.4715	3.9158	5.55405	5.88838	5.73957	4.88748	5.63556	6.29906	5.33281	7.73333	6.26458	4.1131	5.98992
ENSG00000133794	12.3187	12.936	12.4118	12.7515	13.4296	13.7593	11.9494	14.3833	13.3462	13.498	13.2178	13.3833	12.3114	13.6025	12.9334	14.379	12.5131	12.3447	12.484	12.0894	11.8432	14.1288	12.2207	12.5405	12.486	12.6877	13.6607	12.7595	11.8219	12.8175	11.0046	12.6	12.8324	13.5811	12.095	14.0557	11.1851	13.0461	12.4622	12.8051	12.3056	12.6695	12.0575	10.3956	11.901	13.0818
ENSG00000153933	12.8921	13.3859	12.3126	11.8562	14.5318	12.0248	14.5963	12.8217	13.6976	12.8561	14.9431	12.4789	13.2684	12.4693	13.0186	12.6951	14.0039	12.8254	13.1825	12.3195	13.7591	12.6382	11.9535	12.4341	13.0289	12.9579	11.7095	12.2797	14.2816	12.2146	12.5218	12.6716	13.9994	11.9169	13.3511	12.6231	12.603	12.4822	12.9231	12.5442	13.1239	12.8854	12.357	13.4775	12.2995	12.8819
ENSG00000135333	8.67482	17.5624	8.93974	11.3688	6.82452	11.3332	8.41272	12.3799	8.05986	16.8045	5.0035	11.3199	8.85954	11.9016	4.28476	14.8119	8.0615	16.4718	8.3788	11.5792	6.82315	13.8682	8.8393	10.8988	6.5575	13.2498	8.31779	15.1233	7.79402	13.2655	9.00374	11.3472	8.02217	11.6938	2.63498	13.9791	4.05019	10.0251	7.35791	9.77011	8.78789	16.6995	8.47464	18.7998	14.624	17.1835
ENSG00000167978	21.2358	21.4859	20.0353	20.9347	19.8344	20.5002	19.9144	20.4121	20.0259	20.3945	22.1194	21.1463	21.4377	21.8597	21.4298	18.7235	21.5983	19.68	21.4104	21.1271	20.769	19.2652	20.7688	19.0946	22.2611	20.3319	19.6299	20.6166	21.8096	19.8529	22.0667	21.1583	22.2494	18.5074	20.6032	21.4932	21.8651	21.1393	21.5273	21.8165	21.6762	21.0305	20.991	21.1863	20.8122	21.3013
ENSG00000079387	13.8532	13.5463	14.1979	13.4949	14.7061	13.1905	14.9265	13.5147	15.099	13.4909	13.9027	13.4498	14.403	13.0538	14.3206	13.8935	13.9293	13.3794	14.0825	14.2078	14.2392	13.5788	14.4453	13.4219	14.0352	13.4422	12.9131	13.4351	14.5554	13.7891	14.7276	13.1809	14.3027	13.6102	14.5378	13.3751	13.8301	13.1826	13.8364	13.5016	14.4224	13.7404	14.349	14.0693	14.6749	13.944
ENSG00000273000	8.084	5.52501	8.96407	8.50728	8.4869	7.40778	8.20696	6.11872	7.44007	6.26415	9.0754	7.63399	7.65589	9.41852	9.84632	4.99609	10.1799	3.95065	9.4926	8.36881	9.26138	6.3498	9.91484	6.53876	9.49776	8.57475	9.0035	7.12538	10.7227	6.68559	8.29111	6.98872	11.0104	6.87608	8.81804	9.2786	9.23976	7.74769	6.87463	4.75249	9.25402	7.68335	7.84681	5.60104	6.47109	7.97776
ENSG00000070950	13.4522	13.0788	14.2888	13.3277	14.3554	12.8847	15.1157	12.9995	14.239	12.9712	15.2752	12.9719	14.8078	13.15	14.5132	13.2277	14.0677	13.0419	14.0532	13.4636	14.8291	12.8337	14.3129	13.3396	13.927	12.567	14.7642	12.8435	15.0837	13.5202	13.8804	12.9106	14.9384	13.5027	15.5313	13.1554	13.1036	13.0213	14.2667	13.3302	14.7493	12.8854	14.5835	12.9386	14.7147	13.7991
ENSG00000150712	15.5391	16.1037	14.9418	15.1655	15.2751	15.0666	16.5055	15.0376	15.4051	15.5436	15.8587	15.1129	15.802	15.4352	15.565	15.4616	15.557	15.7472	15.7634	15.529	15.0848	15.3403	15.3443	14.8359	14.8546	15.1832	15.2666	15.2806	15.6163	15.1359	15.6717	15.136	15.6563	15.2777	16.8871	14.9622	15.5508	15.3134	15.1814	15.4376	15.9048	15.6811	14.4479	16.6797	15.2062	15.391
ENSG00000185885	21.673	16.0203	21.0912	17.2844	18.9133	17.4737	18.1605	16.9819	19.891	17.2212	18.9356	16.6248	19.0032	16.1933	20.5994	20.2739	20.3715	17.4906	20.2342	16.3158	21.4131	17.7078	21.0932	17.4883	20.6666	16.8016	19.6413	16.9673	20.8221	18.9675	19.6901	16.4964	18.2083	18.0773	20.2682	19.4077	17.8404	18.0878	20.2009	18.9013	20.5986	19.0073	20.4358	16.3965	17.8493	16.6039
ENSG00000116977	15.9841	16.308	15.3948	15.8403	16.2175	16.7828	15.9304	16.9738	16.978	16.034	16.8647	16.2944	15.4858	15.8034	15.7586	16.0024	15.0965	16.1542	16.2084	15.8973	15.7429	15.9026	16.918	15.942	16.4331	16.1388	15.4515	16.0582	15.9993	16.1392	15.4449	16.1517	15.7038	15.6947	17.5465	15.9394	15.3487	15.7578	16.769	16.4578	15.4947	16.0399	15.829	17.0229	15.4938	16.0969
ENSG00000119669	14.5506	17.1105	14.3631	15.1787	13.886	15.058	13.8159	14.725	14.1501	16.1493	13.3818	14.3389	15.3615	15.3048	15.0305	15.3069	14.5203	15.5675	14.1828	14.7104	14.5936	15.0901	15.6335	14.8349	15.5942	15.1477	13.8712	16.1162	14.3257	14.8137	14.4732	15.0414	13.3852	14.3777	15.7507	15.3168	14.5238	15.9352	14.9963	14.972	14.3588	16.1455	14.8383	17.9319	15.603	14.8654
ENSG00000120820	13.2968	13.4137	12.7399	11.5307	11.5639	12.0301	11.7194	11.9028	11.3208	13.5976	9.49867	11.5163	11.4018	11.8688	14.1652	12.9568	12.4929	13.9794	12.8074	12.1288	12.2971	12.8128	11.8165	11.9942	12.0126	12.8064	9.8695	12.9292	10.406	12.4041	12.4563	12.3087	10.6452	12.4397	10.0268	12.0584	15.0029	12.6424	12.5798	12.4435	12.1902	14.0196	14.947	14.707	13.9892	12.2531
ENSG00000248449	4.35795	4.71537	3.41397	5.12981	2.63498	4.23156	9.36869	3.94548	4.37998	4.39401	6.99756	4.79934	3.82456	3.95963	4.53609	3.49983	3.59405	4.13843	4.7259	5.25924	6.61961	4.37682	3.75971	3.97802	4.33478	4.32702	3.57219	5.81647	5.46824	4.36832	3.91493	5.09041	4.17777	2.63498	5.87779	5.47654	6.39641	5.3679	5.18056	5.5225	6.93587	5.1215	3.94625	5.98843	4.50464	5.16257
ENSG00000170417	11.3794	10.8315	12.3392	10.3274	13.6261	10.2916	11.9842	10.6374	12.313	10.9832	10.935	10.1892	11.9922	9.95453	11.8885	11.5879	13.0989	10.7143	10.9126	10.5907	11.8962	11.6107	9.93547	11.5337	11.8819	11.7146	12.3293	10.461	12.052	10.1105	11.9656	10.3287	12.7227	12.1696	12.5571	9.77078	10.3471	9.97959	11.2164	10.0175	11.1519	10.4074	10.9199	10.8258	11.3681	10.5128
ENSG00000174460	4.35795	9.13231	9.06999	4.99306	5.3493	5.61849	5.41972	6.89616	6.85116	10.0317	5.24611	7.07007	6.90963	6.06746	4.57341	9.44654	4.24245	10.2159	5.69053	6.94383	4.68784	6.67349	6.67773	5.28178	4.47858	6.92632	4.52103	8.40905	3.61437	7.70846	5.9802	5.39954	4.04156	6.24137	3.9158	9.14972	4.33798	6.78145	6.90405	6.17106	5.7549	9.11056	5.82311	11.1199	5.7138	7.71015
ENSG00000173599	13.9509	14.5635	13.5045	15.4306	11.6408	15.8302	12.9249	15.6515	11.9456	14.4543	10.9111	16.2427	14.1762	15.3572	14.3076	12.9147	14.1792	14.3984	14.2923	15.0317	13.8528	13.9426	14.6801	15.4686	12.9618	14.4917	12.8821	14.923	13.8983	15.5842	12.2983	15.8752	14.1529	13.8965	13.3387	14.1655	10.9259	14.9736	14.1344	14.6132	13.5909	15.0588	13.2064	13.2326	13.5516	14.9651
ENSG00000242615	6.11765	7.78326	6.0366	6.9144	5.93466	6.04796	6.34163	7.46628	8.1667	7.86161	7.06054	7.56575	5.84106	6.95903	7.03208	7.46473	6.01141	7.47761	5.54444	7.33399	4.57249	7.8065	8.87023	8.20079	5.88614	8.96388	5.21633	7.6411	4.59779	6.97412	5.12093	7.11805	4.77268	5.99669	4.73628	6.75159	4.05019	6.97994	5.042	7.11502	6.86917	8.14755	7.38334	7.43568	8.63192	6.60474
ENSG00000236081	8.13036	5.15337	12.4419	6.42806	12.5431	4.99416	12.2547	5.47516	12.4633	5.25101	11.9021	4.62097	11.6153	5.3392	10.8548	4.62398	12.9961	5.35747	12.3495	6.80486	13.2118	6.75039	11.759	7.876	9.77272	6.84837	14.4163	4.46952	11.8124	5.94125	12.3935	4.49829	11.277	5.54599	15.8495	5.18139	4.98648	5.09978	12.8236	3.5278	12.3766	5.33281	10.1428	4.26906	13.0233	5.16257
ENSG00000178988	15.5821	15.8537	15.1806	15.4872	13.8932	15.7637	15.5342	15.7727	16.7538	16.1505	15.6165	15.5066	15.3409	15.447	15.1956	16.6382	15.7849	16.3172	15.9482	15.8407	15.8546	16.3666	15.9468	16.2576	15.28	16.1187	16	15.5818	14.8264	15.8976	15.0997	15.5524	15.5385	16.2	16.773	15.4977	16.0044	15.4098	15.2128	15.5783	15.5484	15.981	16.1049	16.6369	15.5022	15.5309
ENSG00000164934	16.6061	14.7735	16.768	14.872	16.5044	14.8022	16.7579	15.1309	17.304	14.5374	15.9189	14.7695	17.8852	14.3817	15.8029	15.7645	16.5867	14.7521	16.9936	15.1261	15.9208	15.4136	17.4635	15.3288	18.1332	14.7967	17.1679	14.8387	16.7853	15.4797	17.0948	14.5461	16.3729	16.516	16.5741	14.4027	15.8288	14.4797	16.2753	15.0811	16.8602	14.6034	16.8849	14.2681	15.264	15.3597
ENSG00000228451	6.818	8.61717	8.46268	7.94325	8.53978	7.87124	8.79884	8.20414	8.13635	8.63415	9.27848	7.88793	8.08441	7.10379	8.24831	8.72797	5.92868	9.74359	6.79144	8.15713	7.55157	8.94036	6.67773	7.99532	6.20504	8.24117	8.53932	9.07025	6.52845	7.03106	7.51321	7.93082	7.47799	6.93877	9.37005	7.08716	8.9245	7.81476	7.3075	6.86378	7.23542	9.19186	7.77619	10.2422	9.38067	7.45786
ENSG00000163395	6.818	6.44765	6.59167	6.19051	4.92607	4.09134	9.07034	4.43387	8.59745	5.05733	8.03652	7.88793	3.93128	5.46948	11.0013	4.62398	4.92482	5.94496	8.88878	7.83955	6.42986	4.68799	6.91048	5.48595	10.0661	7.00026	3.93898	6.91237	3.61437	5.47164	5.2623	4.49829	9.10039	3.91319	2.63498	7.90098	4.05019	6.78145	4.88748	7.46556	9.35336	8.9422	6.13925	7.5764	4.97294	5.81984
ENSG00000141756	16.6978	15.8258	19.0022	14.0073	17.1712	14.3348	15.8188	13.5462	18.1615	15.7503	16.5991	14.0677	14.9949	13.8496	18.6066	14.7725	16.1742	15.9451	16.1481	14.3427	19.059	14.2729	16.9049	14.4249	17.3228	14.9625	14.2234	15.6763	16.4656	15.3801	17.8098	14.0771	13.9755	13.7019	19.2122	15.6488	17.0445	15.8331	16.5982	15.2411	17.786	16.5019	18.5298	17.052	20.5365	15.2581
ENSG00000261604	4.72602	7.53758	6.28163	4.16282	5.62347	5.44873	12.211	6.64156	5.62136	6.05188	8.62695	5.88598	5.41946	5.19529	5.88928	6.82373	5.56079	4.88584	5.196	4.68157	6.46074	5.10889	5.50212	5.43767	4.60735	4.86677	5.71178	6.13985	4.39202	5.88006	4.51829	5.81519	6.21643	4.80499	5.74176	6.43896	4.98648	6.92018	5.57806	5.44168	6.38671	7.04167	5.21034	5.24726	5.63879	7.15884
ENSG00000270074	6.46562	8.52518	6.8228	6.09621	4.5981	5.61849	7.05692	6.75625	6.64422	7.6361	6.66048	6.96788	6.45846	7.76288	6.31826	5.82246	5.99524	8.19322	8.3788	7.12542	9.7646	7.70097	5.65449	6.23895	7.0124	7.6316	3.57219	6.64378	4.59779	6.27735	8.82157	8.25946	4.04156	3.91319	4.48957	7.20213	4.56941	6.14237	4.26736	4.68114	7.04729	8.40569	6.94155	9.36741	7.50883	7.5031
ENSG00000166881	14.2638	14.0669	14.3815	13.2312	14.6236	13.1159	15.3733	12.8994	15.0763	13.8824	14.8053	12.988	14.7248	13.2853	14.7675	13.5449	15.0046	14.0099	14.1662	14.042	14.9928	12.8212	14.9532	12.831	14.7788	13.0378	14.8664	13.5809	15.2774	13.4579	15.1974	13.4684	15.116	12.282	15.4536	13.4322	14.9435	13.3539	14.2705	13.1907	14.7568	13.8941	14.114	15.0964	14.3485	14.3661
ENSG00000178115	5.48463	2.63498	4.79344	4.41361	2.63498	3.499	3.88227	2.63498	3.9991	2.63498	7.27036	4.52147	3.56648	3.5875	3.38059	4.76016	6.24772	6.75477	2.63498	5.53224	6.01619	2.63498	5.1354	5.28178	5.93304	5.16196	2.63498	5.64075	2.63498	4.70555	3.69094	7.13851	4.95664	3.7505	3.9158	4.04619	4.33798	5.02357	4.26736	3.72022	4.01487	5.02682	2.63498	6.44753	2.63498	5.66725
ENSG00000004660	12.8272	13.1819	12.9618	12.1123	13.9616	11.6445	11.6398	11.6079	13.3522	11.8474	13.2327	12.0484	13.2051	12.3779	12.474	12.1114	12.9703	13.7127	13.1467	12.178	13.065	11.8702	12.1006	11.9606	13.0674	12.2119	13.2085	12.8382	13.3126	13.5118	13.1356	12.5309	14.6869	12.2543	13.4937	12.9599	13.8216	12.2056	13.7828	12.8604	13.2422	13.2637	12.3726	15.0906	13.7826	12.8753
ENSG00000053254	16.9829	18.4716	15.478	17.2144	15.8558	17.7018	16.9733	17.4372	15.8872	17.8924	16.1627	18.1914	15.9494	17.6399	16.9769	17.3191	16.9035	18.1704	16.0494	17.4637	15.7649	17.1161	16.6127	16.9391	15.991	17.2156	14.3995	17.7526	15.7709	16.6028	16.0213	17.0967	16.4613	16.4337	15.8552	17.3374	16.1875	17.3619	16.2169	17.3542	16.0856	17.6958	16.5861	19.4262	16.6291	17.3187
ENSG00000134717	15.1921	14.888	16.1989	14.1287	15.5589	14.1772	16.0239	14.5178	15.0651	15.1542	14.9449	14.2484	14.8137	14.179	15.4736	16.2776	15.2637	15.2768	15.3159	14.5145	15.4429	15.587	15.7928	15.4031	16.575	15.3088	16.1513	14.8259	15.3806	14.8196	14.7939	14.3356	14.7792	16.1635	15.6524	14.2444	15.2496	14.3534	14.5002	14.5001	15.104	14.9173	14.933	15.8565	15.1869	14.5698
ENSG00000221995	10.7736	9.73072	10.799	10.4067	10.2297	10.2055	9.84228	11.3848	9.17033	9.86591	13.2824	11.3234	8.64761	10.8197	11.2047	8.43858	10.711	9.19491	10.7843	10.3104	10.7535	9.083	10.4847	9.40704	11.6451	10.323	8.5961	10.9748	11.437	9.03576	10.1209	11.252	11.7119	6.40627	10.3113	11.4426	11.8727	10.6658	11.4251	10.5204	10.0048	10.2467	9.74114	10.6841	9.02821	10.1813
ENSG00000172247	3.81956	6.83531	5.18636	4.99306	6.12124	4.66926	3.77917	4.43387	4.76752	6.61236	2.63498	4.2946	4.19886	5.03433	5.05826	6.70111	3.79947	7.12342	3.87685	4.39174	3.41407	6.3332	2.63498	5.82175	3.9799	6.67847	2.63498	7.58467	4.85479	5.47164	3.69094	6.0293	3.31822	4.48602	3.55502	5.88786	3.80505	4.94278	5.042	6.28981	4.1362	6.00351	5.56447	8.89906	4.1131	5.27402
ENSG00000253368	9.07801	11.9536	10.2209	7.83144	14.7961	9.05699	11.2759	9.05241	10.736	12.0958	14.915	8.53082	11.0237	8.95201	7.26247	11.8272	7.99054	11.8733	11.1717	9.42427	10.3199	10.9288	11.3679	9.18132	12.3561	11.5188	14.8561	11.8049	8.75393	10.2487	7.706	9.137	14.8605	9.98034	17.5534	11.549	10.4794	10.5294	13.1511	10.2564	8.7013	11.9497	10.7706	13.7303	12.4162	10.7845
ENSG00000177694	12.8508	13.2464	13.9758	13.8708	10.3831	15.0139	16.8204	14.7536	14.499	13.7465	9.97977	14.1252	13.7599	13.2412	12.5731	11.6397	13.6391	13.2156	14.8037	13.3307	14.545	13.0352	14.3739	13.0857	12.6181	12.932	11.5456	13.6238	12.333	12.1347	14.6694	13.2315	11.306	13.2354	7.19704	13.7187	12.7035	13.8973	12.1219	14.6661	14.1317	12.7615	12.9076	13.5517	10.3089	12.6645
ENSG00000272442	3.66773	3.9018	4.84329	4.41361	3.89192	4.75836	4.35134	2.63498	4.37998	3.84581	4.46271	4.41332	3.39984	3.41729	3.83156	3.84103	4.69394	3.95065	3.97001	4.32458	3.84599	4.30387	5.25605	4.57383	4.54462	2.63498	4.60984	4.98177	4.68927	3.37772	4.09835	5.04631	5.23488	3.91319	4.18069	6.10758	4.05019	5.71607	3.65154	4.82011	4.64245	4.48885	4.2938	2.63498	5.07621	3.31322
ENSG00000222375	5.37097	5.15337	2.63498	6.42806	3.37568	6.84062	2.63498	6.60119	2.63498	7.03969	3.42225	7.62284	3.39984	7.6664	2.63498	3.49983	2.63498	5.06198	3.87685	8.22981	2.63498	5.0262	3.75971	7.40762	2.63498	8.20001	2.63498	6.4461	3.99579	3.37772	3.91493	10.5478	4.4612	4.73238	2.63498	5.88786	2.63498	4.94278	2.63498	4.43938	2.63498	2.63498	2.63498	4.59158	2.63498	5.04114
ENSG00000213252	3.66773	4.71537	2.63498	3.49852	5.40864	4.92014	4.2156	5.28056	4.50345	4.70128	3.73535	4.2946	3.93128	4.38328	4.45793	4.55002	3.46926	4.88584	4.52226	3.91316	2.63498	4.63162	3.61494	4.57383	3.60255	4.97257	2.63498	2.63498	3.82374	5.32455	3.91493	4.42793	3.79775	5.4617	4.05629	2.63498	4.05019	3.38205	4.88748	3.5278	2.63498	4.4122	4.49971	3.81965	3.72848	5.58423
ENSG00000271787	5.7489	7.03151	6.0366	6.38891	2.63498	2.63498	5.70101	5.64578	3.68188	8.38664	5.97742	5.68366	7.48632	6.61661	4.23722	2.63498	5.34566	5.85486	4.57632	5.00142	4.05259	6.38245	5.56508	5.74504	2.63498	6.46835	3.93898	7.46473	2.63498	5.81609	4.32682	5.09041	3.9665	3.91319	7.91232	7.52585	7.37891	6.19401	5.62657	6.39942	5.41888	5.95417	7.1975	6.88749	5.69278	2.63498
ENSG00000151388	16.2924	10.1492	14.9448	8.12416	13.7564	9.05699	14.6676	8.56986	14.3944	9.28151	14.8271	9.35672	14.825	9.27333	15.4908	9.72074	15.6014	11.205	15.804	8.26278	14.9898	8.59035	14.2522	8.71443	13.999	7.88642	11.7001	9.80289	12.4469	8.80275	16.992	9.73172	13.2913	7.79238	13.3635	10.0022	5.49204	9.47824	15.6418	8.85485	15.0501	10.9796	17.2535	12.8779	17.2005	10.0236
ENSG00000163393	10.429	8.57915	11.2971	8.86984	11.1315	9.52988	12.4805	9.10369	10.4614	9.6683	11.4481	9.05487	9.80328	9.5121	11.0296	8.89064	10.8824	9.42915	8.24938	9.38364	12.3344	9.28542	12.0441	9.42839	12.6368	10.1848	10.9198	9.21963	8.30233	8.0757	8.04716	10.5082	8.53696	9.83174	13.4077	9.91234	12.119	9.53566	9.84971	9.41537	10.7957	9.11056	10.1729	9.75284	10.0655	8.79351
[truncated: 20,424 more rows]
