# Supplementary material
Source: Research Square preprint supplement (doi:10.21203/rs.3.rs-9763213/v1)
Supplement: Supplementary file 14 [file e9e226634a5c96ded26f1b45.xlsx]

## Sheet: Primers_gRNAs
Primer_Name	Primer_Sequence(5’-3’)	gRNA_Sequence
EHMT2_F	CTTGTGGAAAGGACGAAACACCGCAAGAGGTGACCATCCCCCGGTTTTAGAGCTAGAAA	CAAGAGGTGACCATCCCCCG
EHMT2_R	TTTCTAGCTCTAAAACCGGGGGATGGTCACCTCTTGCGGTGTTTCGTCCTTTCCACAAG
HDAC7_F	CTTGTGGAAAGGACGAAACACCGGTTACCTGTAGGGAATGCCGGTTTTAGAGCTAGAAA	GTTACCTGTAGGGAATGCCG
HDAC7_R	CTTGTGGAAAGGACGAAACACCGCAAGAGGTGACCATCCCCCGGTTTTAGAGCTAGAAA
