# Supplementary material
Source: Research Square preprint supplement (doi:10.21203/rs.3.rs-9763213/v1)
Supplement: Supplementary file 15 [file fd8aaa6a4a1eac1c8d37d5e5.xlsx]

## Sheet: correlations_GE_histone_tumor_n
baseMean	log2FoldChange	lfcSE	stat	pvalue	padj	ID	EnsemblID	GeneSymbol	dir	Significance	EpigeneticFactor	cor_histone_exp_H3K9me2	pval_histone_exp_H3K9me2	cor_histone_exp_H3K14ac	pval_histone_exp_H3K14ac
79.3612	3.19297	0.282503	11.3024	1.27687e-29	2.03035e-25	ENSG00000129474.16_AJUBA	ENSG00000129474	AJUBA	up	YES	NO	0.386053	0.00672636	-0.494312	0.000355674
112.406	5.02592	0.464102	10.8293	2.49923e-27	1.98702e-23	ENSG00000062038.15_CDH3	ENSG00000062038	CDH3	up	YES	NO	0.40417	0.0043854	-0.513467	0.000189756
368.011	4.43617	0.417936	10.6145	2.55278e-26	1.35306e-22	ENSG00000103888.17_CEMIP	ENSG00000103888	CEMIP	up	YES	NO	0.486499	0.000454812	-0.408777	0.00391865
144.786	4.06814	0.388137	10.4812	1.05379e-25	4.18909e-22	ENSG00000163347.6_CLDN1	ENSG00000163347	CLDN1	up	YES	NO	0.316442	0.028435	-0.462535	0.000933097
283.466	4.89622	0.470222	10.4126	2.17281e-25	6.90996e-22	ENSG00000164379.7_FOXQ1	ENSG00000164379	FOXQ1	up	YES	NO	0.380223	0.00768133	-0.475622	0.000634311
133.885	4.13457	0.403314	10.2515	1.16559e-24	3.08901e-21	ENSG00000105464.4_GRIN2D	ENSG00000105464	GRIN2D	up	YES	NO	0.400335	0.00481046	-0.503713	0.000262513
28.876	4.32166	0.427675	10.105	5.24874e-24	1.19229e-20	ENSG00000112559.15_MDFI	ENSG00000112559	MDFI	up	YES	NO	0.467153	0.000815705	-0.503801	0.000261755
43.0754	-4.94373	0.490755	-10.0737	7.21863e-24	1.43479e-20	ENSG00000131096.10_PYY	ENSG00000131096	PYY	down	YES	NO	-0.443534	0.00159147	0.4712	0.000723895
544.944	-1.79958	0.179452	-10.0282	1.14587e-23	2.0245e-20	ENSG00000149218.5_ENDOD1	ENSG00000149218	ENDOD1	down	YES	NO	-0.460026	0.00100301	0.491772	0.000385526
208.774	3.22772	0.323519	9.97689	1.92407e-23	3.05946e-20	ENSG00000165816.13_VWA2	ENSG00000165816	VWA2	up	YES	NO	0.332546	0.0209231	-0.418921	0.00304164
27.1	6.2042	0.636796	9.74284	1.97941e-22	2.86133e-19	ENSG00000128422.17_KRT17	ENSG00000128422	KRT17	up	YES	NO	0.445916	0.0014909	-0.538231	7.95312e-05
175.826	2.65858	0.273514	9.72009	2.47569e-22	3.18216e-19	ENSG00000116017.11_ARID3A	ENSG00000116017	ARID3A	up	YES	NO	0.366081	0.0104993	-0.534709	9.03748e-05
1038.07	3.34019	0.343817	9.71503	2.6016e-22	3.18216e-19	ENSG00000120708.17_TGFBI	ENSG00000120708	TGFBI	up	YES	NO	0.312767	0.0304324	-0.464399	0.000883992
52.6692	3.60973	0.371922	9.7056	2.85404e-22	3.24158e-19	ENSG00000173894.11_CBX2	ENSG00000173894	CBX2	up	YES	YES	0.318351	0.0274412	-0.520612	0.000148666
1089.71	-2.05938	0.21266	-9.68389	3.53022e-22	3.74226e-19	ENSG00000117592.9_PRDX6	ENSG00000117592	PRDX6	down	YES	NO	-0.383137	0.00719036	0.488883	0.000422202
101.278	2.1507	0.224874	9.56402	1.13273e-21	1.12572e-18	ENSG00000188483.8_IER5L	ENSG00000188483	IER5L	up	YES	NO	0.468814	0.000776834	-0.509685	0.000215455
63.8199	3.2438	0.340721	9.5204	1.72519e-21	1.61366e-18	ENSG00000099953.10_MMP11	ENSG00000099953	MMP11	up	YES	NO	0.351013	0.0144379	-0.543673	6.50927e-05
610.865	2.34499	0.248503	9.43648	3.85531e-21	3.40574e-18	ENSG00000068650.19_ATP11A	ENSG00000068650	ATP11A	up	YES	NO	0.391118	0.00598225	-0.448658	0.00138219
361.307	-1.70223	0.182279	-9.33855	9.76656e-21	7.76992e-18	ENSG00000123643.13_SLC36A1	ENSG00000123643	SLC36A1	down	YES	NO	-0.440958	0.00170698	0.457963	0.00106399
258.918	2.53101	0.271031	9.33848	9.77287e-21	7.76992e-18	ENSG00000131389.18_SLC6A6	ENSG00000131389	SLC6A6	up	YES	NO	0.470692	0.000734888	-0.42849	0.002378
125.371	2.48522	0.268713	9.24859	2.27465e-20	1.72234e-17	ENSG00000158555.15_GDPD5	ENSG00000158555	GDPD5	up	YES	NO	0.414898	0.00336629	-0.466083	0.000841643
277.079	2.77344	0.303054	9.15162	5.60872e-20	4.05383e-17	ENSG00000173898.15_SPTBN2	ENSG00000173898	SPTBN2	up	YES	NO	0.375328	0.00857188	-0.433282	0.00209653
601.916	1.94474	0.212679	9.14401	6.01764e-20	4.16028e-17	ENSG00000136295.15_TTYH3	ENSG00000136295	TTYH3	up	YES	NO	0.469605	0.000758912	-0.483092	0.000505349
130.163	1.63616	0.180119	9.08378	1.04869e-19	6.94798e-17	ENSG00000141582.15_CBX4	ENSG00000141582	CBX4	up	YES	YES	0.446398	0.00147127	-0.45661	0.00110573
27.8899	3.33852	0.368441	9.06121	1.29014e-19	8.20584e-17	ENSG00000122641.11_INHBA	ENSG00000122641	INHBA	up	YES	NO	0.438609	0.00181871	-0.348495	0.015206
721.961	1.88672	0.208385	9.05404	1.3778e-19	8.42631e-17	ENSG00000026508.20_CD44	ENSG00000026508	CD44	up	YES	NO	0.449816	0.00133844	-0.463705	0.000901984
135.638	2.51574	0.278772	9.02435	1.80768e-19	1.06459e-16	ENSG00000069011.16_PITX1	ENSG00000069011	PITX1	up	YES	NO	0.402602	0.00455512	-0.500126	0.000295071
165.164	-1.36239	0.151368	-9.00047	2.24752e-19	1.24644e-16	ENSG00000082146.13_STRADB	ENSG00000082146	STRADB	down	YES	NO	-0.429758	0.00230044	0.454609	0.00117019
122.721	2.12338	0.235952	8.99922	2.27324e-19	1.24644e-16	ENSG00000122778.10_KIAA1549	ENSG00000122778	KIAA1549	up	YES	NO	0.410631	0.00374354	-0.470595	0.000737003
43.8525	3.61244	0.405076	8.91793	4.75089e-19	2.51813e-16	ENSG00000231566.2_LINC02595	ENSG00000231566	LINC02595	up	YES	NO	0.46913	0.000769631	-0.377316	0.00819997
40.4966	4.3971	0.494023	8.90061	5.55422e-19	2.84896e-16	ENSG00000181652.19_ATG9B	ENSG00000181652	ATG9B	up	YES	NO	0.389401	0.00622603	-0.378518	0.00798191
91.9319	2.41439	0.272608	8.85661	8.24809e-19	4.05952e-16	ENSG00000029153.14_ARNTL2	ENSG00000029153	ARNTL2	up	YES	NO	0.377915	0.00809071	-0.506184	0.000242013
41.2591	2.99671	0.338449	8.85425	8.4249e-19	4.05952e-16	ENSG00000110881.12_ASIC1	ENSG00000110881	ASIC1	up	YES	NO	0.266476	0.0671317	-0.352965	0.0138656
290.885	3.39388	0.38521	8.81047	1.24618e-18	5.82811e-16	ENSG00000168502.17_MTCL1	ENSG00000168502	MTCL1	up	YES	NO	0.429721	0.00230267	-0.454211	0.00118341
87.6281	2.91025	0.331006	8.79215	1.4672e-18	6.66571e-16	ENSG00000169247.14_SH3TC2	ENSG00000169247	SH3TC2	up	YES	NO	0.303075	0.0362651	-0.413328	0.00350102
40.1064	3.37626	0.384329	8.78481	1.56623e-18	6.91797e-16	ENSG00000042832.12_TG	ENSG00000042832	TG	up	YES	NO	0.304125	0.0355917	-0.487735	0.000437632
364.368	4.62094	0.528713	8.73998	2.33143e-18	1.00195e-15	ENSG00000130600.19_H19	ENSG00000130600	H19	up	YES	NO	0.192986	0.18878	-0.343842	0.016717
139.225	3.50943	0.402837	8.7118	2.99085e-18	1.25151e-15	ENSG00000163739.5_CXCL1	ENSG00000163739	CXCL1	up	YES	NO	0.491348	0.000390721	-0.465997	0.00084376
64.3145	3.30923	0.381965	8.66369	4.56723e-18	1.86214e-15	ENSG00000162849.16_KIF26B	ENSG00000162849	KIF26B	up	YES	NO	0.283357	0.0509839	-0.443453	0.00159497
218.478	1.4284	0.165233	8.64476	5.39169e-18	2.14333e-15	ENSG00000176978.14_DPP7	ENSG00000176978	DPP7	up	YES	NO	0.395365	0.00541456	-0.456395	0.00111251
81.5882	3.35308	0.389202	8.61528	6.97737e-18	2.70603e-15	ENSG00000198535.5_C2CD4A	ENSG00000198535	C2CD4A	up	YES	NO	0.360477	0.01184	-0.505563	0.000247026
37.4297	3.01382	0.350995	8.58652	8.96431e-18	3.39385e-15	ENSG00000187583.11_PLEKHN1	ENSG00000187583	PLEKHN1	up	YES	NO	0.397072	0.0052	-0.456491	0.00110949
94.2238	3.34491	0.390593	8.56368	1.0932e-17	4.04256e-15	ENSG00000163734.4_CXCL3	ENSG00000163734	CXCL3	up	YES	NO	0.486024	0.000461569	-0.437498	0.00187379
599.299	-2.68155	0.315478	-8.49997	1.89644e-17	6.85347e-15	ENSG00000176641.11_RNF152	ENSG00000176641	RNF152	down	YES	NO	-0.435373	0.0019833	0.483834	0.00049393
166.533	2.00971	0.237104	8.47607	2.32928e-17	8.23063e-15	ENSG00000111110.12_PPM1H	ENSG00000111110	PPM1H	up	YES	NO	0.428192	0.00239654	-0.428025	0.00240698
53.637	3.73875	0.441353	8.4711	2.43082e-17	8.4027e-15	ENSG00000088836.14_SLC4A11	ENSG00000088836	SLC4A11	up	YES	NO	0.417918	0.00311989	-0.414012	0.00344177
31.9969	3.55902	0.420569	8.46239	2.6196e-17	8.86261e-15	ENSG00000138028.16_CGREF1	ENSG00000138028	CGREF1	up	YES	NO	0.195783	0.18233	-0.494086	0.000358249
911.231	1.51853	0.179842	8.44372	3.07394e-17	1.01831e-14	ENSG00000110092.4_CCND1	ENSG00000110092	CCND1	up	YES	NO	0.403706	0.00443509	-0.468168	0.000791754
99.2169	3.05682	0.3626	8.43029	3.44803e-17	1.11892e-14	ENSG00000122861.16_PLAU	ENSG00000122861	PLAU	up	YES	NO	0.389817	0.00616616	-0.409731	0.0038277
48.7292	4.2697	0.509251	8.38427	5.10421e-17	1.62324e-14	ENSG00000281406.2_BLACAT1	ENSG00000281406	BLACAT1	up	YES	NO	0.347908	0.0153898	-0.424504	0.00263702
582.586	1.85899	0.224271	8.28904	1.14169e-16	3.55961e-14	ENSG00000101224.18_CDC25B	ENSG00000101224	CDC25B	up	YES	NO	0.411996	0.003619	-0.375599	0.00852035
146.647	3.39949	0.410688	8.27756	1.2572e-16	3.84438e-14	ENSG00000120875.9_DUSP4	ENSG00000120875	DUSP4	up	YES	NO	0.469423	0.000763001	-0.536886	8.35217e-05
60.1783	4.35316	0.526515	8.26789	1.3635e-16	4.09076e-14	ENSG00000167767.14_KRT80	ENSG00000167767	KRT80	up	YES	NO	0.38335	0.00715559	-0.554092	4.39251e-05
94.2052	2.46571	0.298363	8.26413	1.40718e-16	4.14363e-14	ENSG00000146477.6_SLC22A3	ENSG00000146477	SLC22A3	up	YES	NO	0.193838	0.186798	-0.385934	0.00674477
40.8532	2.16103	0.262061	8.24629	1.63383e-16	4.72355e-14	ENSG00000106089.12_STX1A	ENSG00000106089	STX1A	up	YES	NO	0.419108	0.00302727	-0.437145	0.00189159
14.9017	3.01637	0.36653	8.22955	1.87915e-16	5.33577e-14	ENSG00000157766.19_ACAN	ENSG00000157766	ACAN	up	YES	NO	0.453069	0.00122208	-0.459375	0.0010219
60.4465	3.22778	0.393181	8.20939	2.22315e-16	6.20181e-14	ENSG00000165905.18_LARGE2	ENSG00000165905	LARGE2	up	YES	NO	0.457877	0.0010666	-0.469701	0.000756766
657.074	1.79104	0.218596	8.19337	2.54014e-16	6.96393e-14	ENSG00000171617.15_ENC1	ENSG00000171617	ENC1	up	YES	NO	0.368834	0.0098898	-0.501959	0.000278004
71.2348	5.38926	0.659975	8.16586	3.19148e-16	8.60131e-14	ENSG00000159263.16_SIM2	ENSG00000159263	SIM2	up	YES	NO	0.385429	0.00682338	-0.539593	7.56646e-05
345.315	1.89672	0.232577	8.15526	3.48429e-16	9.23396e-14	ENSG00000006704.11_GTF2IRD1	ENSG00000006704	GTF2IRD1	up	YES	NO	0.454506	0.00117362	-0.433991	0.00205754
312.53	-1.12844	0.138514	-8.14673	3.73908e-16	9.74675e-14	ENSG00000117682.17_DHDDS	ENSG00000117682	DHDDS	down	YES	NO	-0.366701	0.0103592	0.525906	0.000123638
168.9	-3.50552	0.43114	-8.13082	4.2638e-16	1.09353e-13	ENSG00000269404.7_SPIB	ENSG00000269404	SPIB	down	YES	NO	-0.419587	0.00299065	0.499463	0.000301472
335.153	2.65246	0.326667	8.11977	4.67079e-16	1.17889e-13	ENSG00000183018.9_SPNS2	ENSG00000183018	SPNS2	up	YES	NO	0.375937	0.00845649	-0.493514	0.000364817
88.9836	2.55025	0.315292	8.08852	6.03938e-16	1.5005e-13	ENSG00000140859.16_KIFC3	ENSG00000140859	KIFC3	up	YES	NO	0.355834	0.0130596	-0.450461	0.00131463
73.3107	3.80582	0.47106	8.07928	6.51524e-16	1.59383e-13	ENSG00000145506.14_NKD2	ENSG00000145506	NKD2	up	YES	NO	0.364585	0.0108437	-0.40343	0.00446476
488.068	1.18276	0.146683	8.0634	7.42039e-16	1.78775e-13	ENSG00000157227.14_MMP14	ENSG00000157227	MMP14	up	YES	NO	0.256648	0.0782614	-0.422965	0.00274351
19.2125	-3.21538	0.402051	-7.99745	1.27026e-15	3.01468e-13	ENSG00000187783.12_TMEM72	ENSG00000187783	TMEM72	down	YES	NO	-0.386657	0.00663367	0.527172	0.000118252
80.8574	1.34667	0.168732	7.98114	1.44983e-15	3.36033e-13	ENSG00000101189.7_MRGBP	ENSG00000101189	MRGBP	up	YES	YES	0.298073	0.0396179	-0.38569	0.00678262
319.953	2.80707	0.351744	7.98044	1.45816e-15	3.36033e-13	ENSG00000131746.13_TNS4	ENSG00000131746	TNS4	up	YES	NO	0.366889	0.0103171	-0.470824	0.000732021
176.456	2.0994	0.263517	7.96685	1.62774e-15	3.69754e-13	ENSG00000088899.16_LZTS3	ENSG00000088899	LZTS3	up	YES	NO	0.362004	0.0114609	-0.479039	0.000572044
926.172	-1.04011	0.13083	-7.95011	1.86339e-15	4.17321e-13	ENSG00000100412.17_ACO2	ENSG00000100412	ACO2	down	YES	NO	-0.421233	0.00286792	0.557341	3.87496e-05
695.709	1.1778	0.148682	7.92162	2.34429e-15	5.1773e-13	ENSG00000164889.15_SLC4A2	ENSG00000164889	SLC4A2	up	YES	NO	0.354281	0.0134907	-0.525506	0.000125386
87.5059	1.96723	0.248715	7.90959	2.58235e-15	5.62493e-13	ENSG00000006118.15_TMEM132A	ENSG00000006118	TMEM132A	up	YES	NO	0.445347	0.0015144	-0.407586	0.00403497
102.346	2.05531	0.260304	7.8958	2.88459e-15	6.19836e-13	ENSG00000134013.16_LOXL2	ENSG00000134013	LOXL2	up	YES	NO	0.374493	0.00873223	-0.393036	0.00571967
85.993	2.67434	0.338818	7.89314	2.94674e-15	6.24749e-13	ENSG00000181634.8_TNFSF15	ENSG00000181634	TNFSF15	up	YES	NO	0.35487	0.0133258	-0.487764	0.000437229
341.603	2.31141	0.293873	7.86535	3.68066e-15	7.70081e-13	ENSG00000101187.16_SLCO4A1	ENSG00000101187	SLCO4A1	up	YES	NO	0.370235	0.00959164	-0.490034	0.000407224
34.7664	3.54677	0.45107	7.86301	3.75002e-15	7.74404e-13	ENSG00000274979.1_RP11-1143G9.5	ENSG00000274979	RP11-1143G9	up	YES	NO	0.177952	0.22625	-0.46933	0.000765108
88.9464	2.19289	0.279169	7.85508	3.99532e-15	8.14482e-13	ENSG00000089327.15_FXYD5	ENSG00000089327	FXYD5	up	YES	NO	0.382576	0.00728265	-0.468137	0.000792457
46.6801	1.95732	0.249282	7.85184	4.09972e-15	8.25186e-13	ENSG00000141570.11_CBX8	ENSG00000141570	CBX8	up	YES	YES	0.467764	0.000801201	-0.535856	8.67028e-05
76.8132	2.72414	0.348023	7.82746	4.9781e-15	9.89459e-13	ENSG00000081041.9_CXCL2	ENSG00000081041	CXCL2	up	YES	NO	0.454197	0.0011839	-0.455048	0.00115578
411.475	2.31706	0.29637	7.81813	5.36155e-15	1.05252e-12	ENSG00000184916.9_JAG2	ENSG00000184916	JAG2	up	YES	NO	0.302648	0.0365416	-0.383339	0.0071573
416.733	-0.745893	0.0959012	-7.77772	7.38418e-15	1.4319e-12	ENSG00000107185.10_RGP1	ENSG00000107185	RGP1	down	YES	NO	-0.427188	0.00245997	0.544946	6.20823e-05
1210.88	-1.80993	0.23287	-7.77229	7.70778e-15	1.47664e-12	ENSG00000136826.15_KLF4	ENSG00000136826	KLF4	down	YES	NO	-0.355437	0.0131688	0.516783	0.00016955
24.5739	-2.11196	0.272112	-7.76135	8.40284e-15	1.59064e-12	ENSG00000141837.22_CACNA1A	ENSG00000141837	CACNA1A	down	YES	NO	-0.0739812	0.617264	0.432946	0.00211526
130.064	1.0393	0.13405	7.7531	8.96736e-15	1.67753e-12	ENSG00000160767.21_FAM189B	ENSG00000160767	FAM189B	up	YES	NO	0.296554	0.0406854	-0.475528	0.000636098
103.72	2.96644	0.382731	7.75072	9.13751e-15	1.68948e-12	ENSG00000273079.7_GRIN2B	ENSG00000273079	GRIN2B	up	YES	NO	0.29998	0.0383108	-0.391433	0.00593836
83.5592	1.81693	0.234548	7.74652	9.44458e-15	1.72619e-12	ENSG00000124602.10_UNC5CL	ENSG00000124602	UNC5CL	up	YES	NO	0.423483	0.00270724	-0.462373	0.000937468
26.1369	1.43336	0.185299	7.73539	1.0309e-14	1.86276e-12	ENSG00000065600.13_PACC1	ENSG00000065600	PACC1	up	YES	NO	0.449511	0.00134983	-0.417198	0.00317714
266.392	2.45104	0.318726	7.69013	1.46985e-14	2.62608e-12	ENSG00000249859.12_PVT1	ENSG00000249859	PVT1	up	YES	NO	0.402049	0.00461625	-0.377859	0.00810091
26.1296	2.4951	0.324873	7.68022	1.5882e-14	2.806e-12	ENSG00000249992.2_TMEM158	ENSG00000249992	TMEM158	up	YES	NO	0.274792	0.0587316	-0.331829	0.0212176
63.2819	2.09118	0.272623	7.67061	1.71185e-14	2.99123e-12	ENSG00000198720.13_ANKRD13B	ENSG00000198720	ANKRD13B	up	YES	NO	0.355225	0.0132272	-0.427488	0.0024409
704.543	-1.48115	0.193191	-7.66674	1.76421e-14	3.0492e-12	ENSG00000116704.8_SLC35D1	ENSG00000116704	SLC35D1	down	YES	NO	-0.472356	0.000699447	0.542297	6.84962e-05
1020.27	-1.90924	0.249261	-7.65959	1.86526e-14	3.18919e-12	ENSG00000169764.16_UGP2	ENSG00000169764	UGP2	down	YES	NO	-0.375227	0.00859106	0.528495	0.000112853
222.536	1.98506	0.259435	7.65147	1.987e-14	3.36121e-12	ENSG00000102265.12_TIMP1	ENSG00000102265	TIMP1	up	YES	NO	0.281489	0.0525989	-0.409486	0.00385088
269.255	5.42553	0.711137	7.62937	2.35902e-14	3.94851e-12	ENSG00000165376.12_CLDN2	ENSG00000165376	CLDN2	up	YES	NO	0.424639	0.00262785	-0.416871	0.00320348
18.4104	-2.33033	0.305701	-7.62288	2.4807e-14	4.10891e-12	ENSG00000144648.16_ACKR2	ENSG00000144648	ACKR2	down	YES	NO	-0.443818	0.00157918	0.509165	0.00021922
47.1312	4.43314	0.581796	7.61975	2.54164e-14	4.16645e-12	ENSG00000101115.13_SALL4	ENSG00000101115	SALL4	up	YES	NO	0.263404	0.0704661	-0.533243	9.52736e-05
154.983	1.95488	0.25668	7.61603	2.616e-14	4.2446e-12	ENSG00000120254.16_MTHFD1L	ENSG00000120254	MTHFD1L	up	YES	NO	0.34215	0.017297	-0.39658	0.00526105
94.7941	1.97068	0.260086	7.57704	3.53534e-14	5.67832e-12	ENSG00000118707.11_TGIF2	ENSG00000118707	TGIF2	up	YES	NO	0.431908	0.00217406	-0.367388	0.0102061
5047.56	2.5147	0.33207	7.57282	3.65217e-14	5.80731e-12	ENSG00000108821.14_COL1A1	ENSG00000108821	COL1A1	up	YES	NO	0.199261	0.174531	-0.434772	0.00201529
25.0978	1.8906	0.250045	7.56104	3.99865e-14	6.29531e-12	ENSG00000100228.14_RAB36	ENSG00000100228	RAB36	up	YES	NO	0.392384	0.0058078	-0.346356	0.0158855
85.554	4.69545	0.621991	7.54907	4.38382e-14	6.83403e-12	ENSG00000196611.6_MMP1	ENSG00000196611	MMP1	up	YES	NO	0.365581	0.0106133	-0.453341	0.00121276
887.854	2.05209	0.272087	7.54203	4.62717e-14	7.14336e-12	ENSG00000167880.8_EVPL	ENSG00000167880	EVPL	up	YES	NO	0.322014	0.0256153	-0.54701	5.74686e-05
579.403	2.09371	0.277793	7.53695	4.81102e-14	7.35578e-12	ENSG00000136997.21_MYC	ENSG00000136997	MYC	up	YES	YES	0.408291	0.00396582	-0.412104	0.00360934
184.701	1.96166	0.260584	7.52795	5.1542e-14	7.80542e-12	ENSG00000109501.15_WFS1	ENSG00000109501	WFS1	up	YES	NO	0.372433	0.00913934	-0.421612	0.00284025
577.76	1.24888	0.16603	7.52204	5.39292e-14	8.08989e-12	ENSG00000196411.10_EPHB4	ENSG00000196411	EPHB4	up	YES	NO	0.352356	0.014042	-0.397347	0.00516611
42.61	3.05001	0.405879	7.51458	5.70937e-14	8.48455e-12	ENSG00000165912.16_PACSIN3	ENSG00000165912	PACSIN3	up	YES	NO	0.297525	0.0400002	-0.433319	0.00209451
571.538	1.91685	0.255166	7.51217	5.81553e-14	8.54908e-12	ENSG00000105976.16_MET	ENSG00000105976	MET	up	YES	NO	0.341591	0.0174923	-0.381176	0.00751774
132.924	1.50864	0.200853	7.51117	5.86032e-14	8.54908e-12	ENSG00000143126.8_CELSR2	ENSG00000143126	CELSR2	up	YES	NO	0.307917	0.033245	-0.334762	0.020034
342.695	0.93348	0.124401	7.50383	6.19811e-14	8.95965e-12	ENSG00000064666.15_CNN2	ENSG00000064666	CNN2	up	YES	NO	0.404766	0.00432245	-0.542067	6.9082e-05
144.193	1.08064	0.14413	7.4977	6.49496e-14	9.30417e-12	ENSG00000103148.17_NPRL3	ENSG00000103148	NPRL3	up	YES	NO	0.485116	0.000474742	-0.487019	0.000447509
843.023	1.8861	0.251912	7.48716	7.03817e-14	9.99231e-12	ENSG00000125398.8_SOX9	ENSG00000125398	SOX9	up	YES	NO	0.405125	0.00428491	-0.494526	0.000353255
1099.49	-1.81141	0.241995	-7.48532	7.13755e-14	1.00437e-11	ENSG00000042445.14_RETSAT	ENSG00000042445	RETSAT	down	YES	NO	-0.426385	0.0025118	0.485636	0.000467156
196.02	0.754319	0.100799	7.4834	7.24216e-14	1.01015e-11	ENSG00000165733.8_BMS1	ENSG00000165733	BMS1	up	YES	NO	0.357278	0.0126693	-0.415509	0.00331513
361.581	1.63488	0.21899	7.46558	8.29338e-14	1.12712e-11	ENSG00000123989.14_CHPF	ENSG00000123989	CHPF	up	YES	NO	0.322096	0.0255759	-0.506585	0.000238829
353.509	-1.57925	0.211475	-7.46779	8.15522e-14	1.12712e-11	ENSG00000139433.11_GLTP	ENSG00000139433	GLTP	down	YES	NO	-0.432819	0.00212238	0.499187	0.000304179
418.937	1.73201	0.231974	7.46641	8.24099e-14	1.12712e-11	ENSG00000183742.13_MACC1	ENSG00000183742	MACC1	up	YES	NO	0.363659	0.0110619	-0.406385	0.00415531
149.345	2.48168	0.332759	7.45789	8.79174e-14	1.18472e-11	ENSG00000157193.18_LRP8	ENSG00000157193	LRP8	up	YES	NO	0.401408	0.00468804	-0.364106	0.0109561
27.3622	2.37584	0.318665	7.45562	8.94481e-14	1.19522e-11	ENSG00000151388.11_ADAMTS12	ENSG00000151388	ADAMTS12	up	YES	NO	0.275253	0.0582922	-0.448175	0.00140082
1312.54	-3.97358	0.533642	-7.44615	9.61038e-14	1.27345e-11	ENSG00000133742.14_CA1	ENSG00000133742	CA1	down	YES	NO	-0.349422	0.0149194	0.591961	9.3551e-06
402.663	-2.1701	0.291564	-7.44296	9.84559e-14	1.29384e-11	ENSG00000187699.10_C2orf88	ENSG00000187699	C2orf88	down	YES	NO	-0.416895	0.00320155	0.481559	0.000529709
41.7592	2.19245	0.294643	7.44101	9.99169e-14	1.30228e-11	ENSG00000128578.10_STRIP2	ENSG00000128578	STRIP2	up	YES	NO	0.486805	0.000450497	-0.371575	0.00931374
860.265	0.96099	0.129322	7.43098	1.07793e-13	1.39351e-11	ENSG00000164916.11_FOXK1	ENSG00000164916	FOXK1	up	YES	NO	0.328122	0.0227976	-0.400776	0.00475985
2065.26	-2.04915	0.275938	-7.42614	1.11809e-13	1.43376e-11	ENSG00000144063.4_MALL	ENSG00000144063	MALL	down	YES	NO	-0.385753	0.00677295	0.50481	0.000253229
245.433	-1.04777	0.141461	-7.40681	1.29375e-13	1.64575e-11	ENSG00000162144.10_CYB561A3	ENSG00000162144	CYB561A3	down	YES	NO	-0.404329	0.00436852	0.465554	0.000854757
114.048	1.14298	0.154406	7.40243	1.33718e-13	1.66114e-11	ENSG00000114019.15_AMOTL2	ENSG00000114019	AMOTL2	up	YES	NO	0.353828	0.0136189	-0.368604	0.0099397
397.126	2.44381	0.330085	7.40358	1.32558e-13	1.66114e-11	ENSG00000139289.14_PHLDA1	ENSG00000139289	PHLDA1	up	YES	NO	0.495056	0.000347344	-0.455715	0.00113416
34.6208	3.06525	0.414033	7.40342	1.32725e-13	1.66114e-11	ENSG00000253368.4_TRNP1	ENSG00000253368	TRNP1	up	YES	NO	0.362103	0.0114368	-0.353744	0.0136427
142.206	2.10315	0.284245	7.39908	1.37129e-13	1.6773e-11	ENSG00000163013.12_FBXO41	ENSG00000163013	FBXO41	up	YES	NO	0.368215	0.0100242	-0.462071	0.000945675
121.356	1.28736	0.173985	7.39929	1.36915e-13	1.6773e-11	ENSG00000204054.14_LINC00963	ENSG00000204054	LINC00963	up	YES	NO	0.347975	0.015369	-0.484717	0.000480651
17.8249	-2.54314	0.344271	-7.38702	1.50159e-13	1.82266e-11	ENSG00000102010.15_BMX	ENSG00000102010	BMX	down	YES	NO	-0.269814	0.0636517	0.441754	0.00167049
44.2225	-3.13126	0.423968	-7.38561	1.51753e-13	1.82805e-11	ENSG00000109182.12_CWH43	ENSG00000109182	CWH43	down	YES	NO	-0.390991	0.00599995	0.521068	0.000146341
215.623	0.983808	0.133255	7.38291	1.54864e-13	1.8515e-11	ENSG00000160803.8_UBQLN4	ENSG00000160803	UBQLN4	up	YES	NO	0.382853	0.00723702	-0.437567	0.00187033
1329.64	-1.98733	0.269487	-7.3745	1.64961e-13	1.95749e-11	ENSG00000181061.14_HIGD1A	ENSG00000181061	HIGD1A	down	YES	NO	-0.435344	0.00198485	0.525287	0.000126353
17.4411	2.14056	0.290371	7.37181	1.68323e-13	1.98259e-11	ENSG00000078900.15_TP73	ENSG00000078900	TP73	up	YES	NO	0.480218	0.000551863	-0.484841	0.000478811
17.9307	-2.0493	0.278082	-7.36942	1.71378e-13	2.00374e-11	ENSG00000144821.10_MYH15	ENSG00000144821	MYH15	down	YES	NO	-0.232452	0.11186	0.564956	2.87349e-05
53.7787	2.39502	0.325706	7.35333	1.93326e-13	2.24385e-11	ENSG00000088826.18_SMOX	ENSG00000088826	SMOX	up	YES	NO	0.50684	0.000236825	-0.37623	0.00840136
116.021	3.30103	0.44945	7.3446	2.06379e-13	2.37799e-11	ENSG00000175832.13_ETV4	ENSG00000175832	ETV4	up	YES	NO	0.318237	0.0274995	-0.456554	0.00110752
92.6203	-1.9762	0.269405	-7.33543	2.21014e-13	2.5283e-11	ENSG00000178031.18_ADAMTSL1	ENSG00000178031	ADAMTSL1	down	YES	NO	-0.320947	0.0261364	0.509786	0.000214731
137.004	1.99642	0.272604	7.32351	2.4157e-13	2.74371e-11	ENSG00000112759.19_SLC29A1	ENSG00000112759	SLC29A1	up	YES	NO	0.261818	0.0722377	-0.433943	0.00206017
26.8942	2.81193	0.384244	7.31808	2.51537e-13	2.83665e-11	ENSG00000183914.14_DNAH2	ENSG00000183914	DNAH2	up	YES	NO	0.453025	0.00122358	-0.312092	0.0308114
923.447	-1.38734	0.189756	-7.31116	2.64853e-13	2.94897e-11	ENSG00000158158.12_CNNM4	ENSG00000158158	CNNM4	down	YES	NO	-0.367849	0.0101043	0.488695	0.000424691
190.676	2.05421	0.280976	7.31098	2.65205e-13	2.94897e-11	ENSG00000196739.15_COL27A1	ENSG00000196739	COL27A1	up	YES	NO	0.352689	0.0139454	-0.384249	0.00701018
25.0093	1.84418	0.252396	7.30672	2.73752e-13	3.02286e-11	ENSG00000175711.8_B3GNTL1	ENSG00000175711	B3GNTL1	up	YES	NO	0.271988	0.0614643	-0.47001	0.000749889
587.7	1.36126	0.186429	7.30177	2.84009e-13	3.11451e-11	ENSG00000124766.7_SOX4	ENSG00000124766	SOX4	up	YES	NO	0.401576	0.00466912	-0.362517	0.0113358
44.0209	3.01101	0.412557	7.2984	2.91211e-13	3.17161e-11	ENSG00000273604.2_EPOP	ENSG00000273604	EPOP	up	YES	NO	0.506729	0.000237692	-0.452083	0.00125635
302.8	1.65465	0.226771	7.29657	2.95201e-13	3.19319e-11	ENSG00000089351.15_GRAMD1A	ENSG00000089351	GRAMD1A	up	YES	NO	0.524537	0.000129711	-0.438647	0.00181684
226.032	1.24642	0.170858	7.29508	2.98478e-13	3.20683e-11	ENSG00000120256.11_LRP11	ENSG00000120256	LRP11	up	YES	NO	0.195785	0.182325	-0.456875	0.00109746
18.4189	2.36895	0.325237	7.28376	3.24636e-13	3.46446e-11	ENSG00000143333.7_RGS16	ENSG00000143333	RGS16	up	YES	NO	0.411588	0.00365585	-0.400755	0.00476226
503.334	1.48146	0.203538	7.27851	3.37534e-13	3.57808e-11	ENSG00000167291.16_TBC1D16	ENSG00000167291	TBC1D16	up	YES	NO	0.355263	0.0132168	-0.443387	0.00159784
157.675	2.23444	0.307204	7.27348	3.50331e-13	3.68915e-11	ENSG00000107719.9_PALD1	ENSG00000107719	PALD1	up	YES	NO	0.386572	0.00664656	-0.47208	0.000705214
1344.87	2.06572	0.284739	7.25476	4.02375e-13	4.20932e-11	ENSG00000130702.15_LAMA5	ENSG00000130702	LAMA5	up	YES	NO	0.401164	0.0047156	-0.457013	0.00109317
50.2897	4.58564	0.632415	7.25099	4.13733e-13	4.29985e-11	ENSG00000129451.12_KLK10	ENSG00000129451	KLK10	up	YES	NO	0.328002	0.02285	-0.425258	0.00258617
148.527	1.03396	0.143286	7.21606	5.35165e-13	5.49968e-11	ENSG00000106683.15_LIMK1	ENSG00000106683	LIMK1	up	YES	NO	0.409377	0.00386121	-0.544562	6.2976e-05
76.0631	3.10798	0.430717	7.21582	5.36099e-13	5.49968e-11	ENSG00000181577.16_C6orf223	ENSG00000181577	C6orf223	up	YES	NO	0.400727	0.00476546	-0.389994	0.00614091
45.1136	3.36029	0.467169	7.19287	6.34415e-13	6.46656e-11	ENSG00000160183.17_TMPRSS3	ENSG00000160183	TMPRSS3	up	YES	NO	0.279945	0.0539647	-0.325347	0.0240437
1454.34	-1.01589	0.141321	-7.18851	6.55014e-13	6.6249e-11	ENSG00000163251.4_FZD5	ENSG00000163251	FZD5	down	YES	NO	-0.421376	0.00285743	0.470868	0.000731061
18.8705	1.80104	0.250569	7.18783	6.58282e-13	6.6249e-11	ENSG00000182118.8_FAM89A	ENSG00000182118	FAM89A	up	YES	NO	0.385104	0.00687443	-0.510777	0.000207724
137.036	1.53785	0.214187	7.17991	6.97553e-13	6.97596e-11	ENSG00000177410.13_ZFAS1	ENSG00000177410	ZFAS1	up	YES	NO	0.391845	0.00588152	-0.414702	0.00338282
169.861	1.29572	0.180508	7.17821	7.06318e-13	7.01948e-11	ENSG00000157350.13_ST3GAL2	ENSG00000157350	ST3GAL2	up	YES	NO	0.311604	0.0310881	-0.41519	0.00334176
309.897	0.870577	0.121358	7.1736	7.30529e-13	7.215e-11	ENSG00000204371.11_EHMT2	ENSG00000204371	EHMT2	up	YES	YES	0.333872	0.0203873	-0.386651	0.00663447
542.833	0.911435	0.12716	7.16764	7.63034e-13	7.4895e-11	ENSG00000130309.11_COLGALT1	ENSG00000130309	COLGALT1	up	YES	NO	0.286436	0.0484104	-0.428003	0.00240835
488.874	-1.29536	0.181164	-7.15017	8.66733e-13	8.40361e-11	ENSG00000162437.14_RAVER2	ENSG00000162437	RAVER2	down	YES	NO	-0.377706	0.00812864	0.469194	0.000768175
150.43	4.01149	0.561013	7.15043	8.65065e-13	8.40361e-11	ENSG00000178773.15_CPNE7	ENSG00000178773	CPNE7	up	YES	NO	0.215881	0.140566	-0.400864	0.00474973
366.167	-1.74659	0.244312	-7.14902	8.73991e-13	8.42263e-11	ENSG00000158201.10_ABHD3	ENSG00000158201	ABHD3	down	YES	NO	-0.332062	0.0211216	0.465244	0.000862508
447.894	-1.23987	0.173562	-7.14368	9.08641e-13	8.70379e-11	ENSG00000120162.10_MOB3B	ENSG00000120162	MOB3B	down	YES	NO	-0.438306	0.00183358	0.489044	0.000420078
1248.14	-2.82878	0.396399	-7.1362	9.59465e-13	9.1356e-11	ENSG00000080493.18_SLC4A4	ENSG00000080493	SLC4A4	down	YES	NO	-0.3948	0.00548719	0.599529	6.70583e-06
315.915	-2.39783	0.336074	-7.13482	9.69144e-13	9.17283e-11	ENSG00000140323.6_DISP2	ENSG00000140323	DISP2	down	YES	NO	-0.2959	0.0411524	0.497994	0.000316113
582.408	2.1613	0.303142	7.12967	1.00613e-12	9.46656e-11	ENSG00000187498.16_COL4A1	ENSG00000187498	COL4A1	up	YES	NO	0.347745	0.0154413	-0.352633	0.0139616
463.557	-1.61182	0.226185	-7.1261	1.0325e-12	9.60107e-11	ENSG00000119950.21_MXI1	ENSG00000119950	MXI1	down	YES	NO	-0.33969	0.0181708	0.453843	0.00119575
289.45	-2.20758	0.309767	-7.12658	1.02895e-12	9.60107e-11	ENSG00000172594.13_SMPDL3A	ENSG00000172594	SMPDL3A	down	YES	NO	-0.345647	0.0161164	0.445522	0.00150713
27.6922	2.25058	0.316806	7.10396	1.21228e-12	1.12073e-10	ENSG00000131188.12_PRR7	ENSG00000131188	PRR7	up	YES	NO	0.307967	0.0332155	-0.437158	0.00189094
15.6643	3.14782	0.443202	7.10245	1.22566e-12	1.12654e-10	ENSG00000279806.1_RP11-58O9.2	ENSG00000279806	RP11-58O9	up	YES	NO	0.283937	0.0504912	-0.382486	0.00729754
376.642	-1.18556	0.167197	-7.09076	1.33374e-12	1.21884e-10	ENSG00000143061.18_IGSF3	ENSG00000143061	IGSF3	down	YES	NO	-0.305159	0.0349385	0.421885	0.00282052
301.698	1.86386	0.263088	7.08455	1.39493e-12	1.26747e-10	ENSG00000127418.15_FGFRL1	ENSG00000127418	FGFRL1	up	YES	NO	0.380309	0.00766648	-0.358801	0.0122684
266.471	-3.59321	0.507745	-7.0768	1.47525e-12	1.33283e-10	ENSG00000118777.12_ABCG2	ENSG00000118777	ABCG2	down	YES	YES	-0.394474	0.00552955	0.571375	2.22051e-05
719.394	-1.02535	0.145101	-7.06648	1.58912e-12	1.42761e-10	ENSG00000100266.19_PACSIN2	ENSG00000100266	PACSIN2	down	YES	NO	-0.335812	0.0196241	0.386294	0.00668927
1489.73	-2.25458	0.319268	-7.06172	1.64452e-12	1.46907e-10	ENSG00000134531.10_EMP1	ENSG00000134531	EMP1	down	YES	NO	-0.39561	0.00538333	0.529787	0.000107797
13.3705	2.60352	0.368755	7.06031	1.66137e-12	1.47583e-10	ENSG00000104415.14_CCN4	ENSG00000104415	CCN4	up	YES	NO	0.381165	0.00751953	-0.353787	0.0136304
64.0702	-3.14547	0.44567	-7.05785	1.69098e-12	1.49379e-10	ENSG00000163815.6_CLEC3B	ENSG00000163815	CLEC3B	down	YES	NO	-0.381411	0.00747772	0.385518	0.00680956
871.641	-1.7455	0.247525	-7.05182	1.76596e-12	1.55141e-10	ENSG00000076641.4_PAG1	ENSG00000076641	PAG1	down	YES	NO	-0.380605	0.00761533	0.436141	0.00194309
49.7876	-2.06995	0.293585	-7.05062	1.78124e-12	1.55624e-10	ENSG00000170703.16_TTLL6	ENSG00000170703	TTLL6	down	YES	NO	-0.322016	0.0256144	0.491122	0.000393507
87.1884	2.46371	0.349961	7.03994	1.92317e-12	1.67106e-10	ENSG00000160862.13_AZGP1	ENSG00000160862	AZGP1	up	YES	NO	0.345417	0.0161917	-0.347697	0.0154564
644.654	-1.02206	0.145351	-7.03169	2.04051e-12	1.75435e-10	ENSG00000100014.20_SPECC1L	ENSG00000100014	SPECC1L	down	YES	NO	-0.367601	0.010159	0.396615	0.00525675
44.9817	1.73443	0.246661	7.03165	2.04109e-12	1.75435e-10	ENSG00000120327.7_PCDHB14	ENSG00000120327	PCDHB14	up	YES	NO	0.242496	0.0967811	-0.404688	0.00433064
89.5109	1.16378	0.165617	7.02694	2.11117e-12	1.80482e-10	ENSG00000186416.17_NKRF	ENSG00000186416	NKRF	up	YES	NO	0.285211	0.0494218	-0.46289	0.000923564
60.6288	2.28948	0.325971	7.02355	2.16297e-12	1.83742e-10	ENSG00000103253.19_HAGHL	ENSG00000103253	HAGHL	up	YES	NO	0.285197	0.0494328	-0.468993	0.000772745
462.405	1.33218	0.18969	7.02294	2.17241e-12	1.83742e-10	ENSG00000214078.13_CPNE1	ENSG00000214078	CPNE1	up	YES	NO	0.310497	0.0317229	-0.354043	0.013558
321.421	1.55779	0.221905	7.02008	2.21744e-12	1.86558e-10	ENSG00000126001.16_CEP250	ENSG00000126001	CEP250	up	YES	NO	0.21788	0.13684	-0.486865	0.000449656
10.3713	2.75591	0.39277	7.0166	2.27337e-12	1.90257e-10	ENSG00000124216.4_SNAI1	ENSG00000124216	SNAI1	up	YES	YES	0.425546	0.00256701	-0.333924	0.0203663
28.255	-2.52095	0.360144	-6.99983	2.56266e-12	2.13177e-10	ENSG00000129167.10_TPH1	ENSG00000129167	TPH1	down	YES	NO	-0.275054	0.0584814	0.433815	0.00206717
306.545	-1.46685	0.209573	-6.99921	2.57405e-12	2.13177e-10	ENSG00000163249.13_CCNYL1	ENSG00000163249	CCNYL1	down	YES	NO	-0.345938	0.0160212	0.497698	0.000319146
820.656	-1.7656	0.252302	-6.99795	2.59735e-12	2.13992e-10	ENSG00000151623.15_NR3C2	ENSG00000151623	NR3C2	down	YES	NO	-0.339124	0.0183771	0.530887	0.000103657
117.84	0.979496	0.140343	6.97928	2.96703e-12	2.4319e-10	ENSG00000184675.11_AMER1	ENSG00000184675	AMER1	up	YES	NO	0.343332	0.01689	-0.439411	0.00177983
330.417	-2.48817	0.356881	-6.97198	3.12511e-12	2.54833e-10	ENSG00000197766.8_CFD	ENSG00000197766	CFD	down	YES	NO	-0.24023	0.100037	0.320886	0.0261664
113.13	0.906999	0.130127	6.97012	3.16668e-12	2.55601e-10	ENSG00000102119.12_EMD	ENSG00000102119	EMD	up	YES	NO	0.328623	0.0225784	-0.376473	0.00835584
582.624	1.2729	0.182608	6.97068	3.15421e-12	2.55601e-10	ENSG00000114554.12_PLXNA1	ENSG00000114554	PLXNA1	up	YES	NO	0.311056	0.0314013	-0.407247	0.00406865
268.503	1.74826	0.250981	6.9657	3.26773e-12	2.62425e-10	ENSG00000153395.10_LPCAT1	ENSG00000153395	LPCAT1	up	YES	NO	0.5269	0.000119389	-0.389223	0.00625178
272.856	-1.52248	0.218605	-6.96453	3.29509e-12	2.63292e-10	ENSG00000181751.10_MACIR	ENSG00000181751	MACIR	down	YES	NO	-0.444638	0.00154411	0.474698	0.000652166
145.107	2.8943	0.416003	6.95742	3.46572e-12	2.75542e-10	ENSG00000137699.17_TRIM29	ENSG00000137699	TRIM29	up	YES	NO	0.267801	0.0657325	-0.393085	0.00571321
51.7399	1.12775	0.162383	6.94496	3.78577e-12	2.95132e-10	ENSG00000010539.12_ZNF200	ENSG00000010539	ZNF200	up	YES	NO	0.317388	0.0279387	-0.421582	0.00284247
165.178	1.5646	0.225309	6.94424	3.80492e-12	2.95132e-10	ENSG00000112877.8_CEP72	ENSG00000112877	CEP72	up	YES	NO	0.4763	0.000621494	-0.48678	0.000450849
202.783	2.52205	0.36316	6.94473	3.79198e-12	2.95132e-10	ENSG00000166278.15_C2	ENSG00000166278	C2	up	YES	NO	0.237959	0.103385	-0.340808	0.0177693
25.192	3.47388	0.500133	6.94592	3.76001e-12	2.95132e-10	ENSG00000179546.5_HTR1D	ENSG00000179546	HTR1D	up	YES	NO	0.307091	0.0337454	-0.387367	0.00652596
415.68	2.01963	0.290768	6.94585	3.76197e-12	2.95132e-10	ENSG00000198959.12_TGM2	ENSG00000198959	TGM2	up	YES	NO	0.308187	0.0330833	-0.385031	0.00688592
75.9957	1.48842	0.214441	6.94093	3.89514e-12	3.00663e-10	ENSG00000232956.9_SNHG15	ENSG00000232956	SNHG15	up	YES	NO	0.335225	0.0198522	-0.365368	0.0106623
37.9403	2.31072	0.33304	6.93827	3.9694e-12	3.04915e-10	ENSG00000062282.15_DGAT2	ENSG00000062282	DGAT2	up	YES	NO	0.280037	0.053883	-0.437731	0.00186211
111.609	-1.82478	0.263314	-6.93006	4.20662e-12	3.21584e-10	ENSG00000177181.15_RIMKLA	ENSG00000177181	RIMKLA	down	YES	NO	-0.399882	0.00486298	0.43702	0.00189793
470.757	-1.34316	0.193871	-6.9281	4.26516e-12	3.24499e-10	ENSG00000152642.11_GPD1L	ENSG00000152642	GPD1L	down	YES	NO	-0.45328	0.00121484	0.508021	0.000227726
1004.26	-1.32147	0.191051	-6.91686	4.61749e-12	3.49632e-10	ENSG00000117620.15_SLC35A3	ENSG00000117620	SLC35A3	down	YES	NO	-0.44543	0.00151095	0.457222	0.00108668
28.8043	3.19968	0.462983	6.91101	4.8123e-12	3.62656e-10	ENSG00000287156.1_RP11-242G5.1	ENSG00000287156	RP11-242G5	up	YES	NO	0.455554	0.00113937	-0.447591	0.00142361
589.538	-1.09289	0.158379	-6.90043	5.18462e-12	3.88871e-10	ENSG00000115977.21_AAK1	ENSG00000115977	AAK1	down	YES	NO	-0.263482	0.0703796	0.436963	0.00190085
274.976	1.84847	0.267941	6.8988	5.24445e-12	3.90111e-10	ENSG00000078114.19_NEBL	ENSG00000078114	NEBL	up	YES	NO	0.330507	0.0217702	-0.449302	0.00135769
36.0179	2.8494	0.413063	6.89823	5.26544e-12	3.90111e-10	ENSG00000151136.15_BTBD11	ENSG00000151136	BTBD11	up	YES	NO	0.436362	0.00193166	-0.319083	0.0270679
238.567	1.24476	0.180469	6.89734	5.29858e-12	3.90111e-10	ENSG00000157827.20_FMNL2	ENSG00000157827	FMNL2	up	YES	NO	0.333163	0.0206723	-0.443942	0.00157381
931.061	-2.52049	0.36543	-6.89732	5.29929e-12	3.90111e-10	ENSG00000160408.16_ST6GALNAC6	ENSG00000160408	ST6GALNAC6	down	YES	NO	-0.312042	0.0308398	0.352327	0.0140506
20.338	1.4027	0.203667	6.88722	5.68915e-12	4.16881e-10	ENSG00000189046.11_ALKBH2	ENSG00000189046	ALKBH2	up	YES	NO	0.355742	0.0130848	-0.41513	0.00334677
174.709	2.97852	0.432538	6.88616	5.73174e-12	4.18075e-10	ENSG00000151012.13_SLC7A11	ENSG00000151012	SLC7A11	up	YES	NO	0.313336	0.0301157	-0.401049	0.00472869
143.853	1.2339	0.179449	6.87606	6.1532e-12	4.46767e-10	ENSG00000234420.7_ZNF37BP	ENSG00000234420	ZNF37BP	up	YES	NO	0.274484	0.0590266	-0.452844	0.00122982
194.1	2.62727	0.382397	6.87052	6.39687e-12	4.62348e-10	ENSG00000243509.6_TNFRSF6B	ENSG00000243509	TNFRSF6B	up	YES	NO	0.29122	0.0446214	-0.377748	0.00812109
28.2546	2.40209	0.349745	6.86811	6.50591e-12	4.68102e-10	ENSG00000174672.16_BRSK2	ENSG00000174672	BRSK2	up	YES	NO	0.198581	0.176035	-0.359459	0.0120986
16.8472	2.07192	0.301931	6.86223	6.7796e-12	4.85596e-10	ENSG00000141519.15_CCDC40	ENSG00000141519	CCDC40	up	YES	NO	0.306174	0.0343076	-0.394543	0.00552066
255.954	-1.77018	0.25819	-6.85611	7.07593e-12	5.04549e-10	ENSG00000187091.14_PLCD1	ENSG00000187091	PLCD1	down	YES	NO	-0.318372	0.0274304	0.455181	0.00115143
634.42	0.629956	0.0919059	6.85436	7.16341e-12	5.08506e-10	ENSG00000171681.13_ATF7IP	ENSG00000171681	ATF7IP	up	YES	YES	0.438559	0.00182114	-0.364693	0.0108185
26.0985	-2.15131	0.314016	-6.85095	7.3361e-12	5.1845e-10	ENSG00000105784.15_RUNDC3B	ENSG00000105784	RUNDC3B	down	YES	NO	-0.329737	0.0220974	0.471532	0.000716811
38.9629	1.13847	0.166254	6.84777	7.50107e-12	5.27763e-10	ENSG00000204366.4_ZBTB12	ENSG00000204366	ZBTB12	up	YES	NO	0.289434	0.0460066	-0.358234	0.0124165
1033.89	-1.88041	0.274728	-6.84462	7.66808e-12	5.37137e-10	ENSG00000187097.13_ENTPD5	ENSG00000187097	ENTPD5	down	YES	NO	-0.367618	0.0101552	0.493488	0.000365123
21.8653	-3.09943	0.453443	-6.83532	8.18215e-12	5.70633e-10	ENSG00000152292.17_SH2D6	ENSG00000152292	SH2D6	down	YES	NO	-0.284134	0.0503243	0.37383	0.00886163
762.852	-1.05314	0.15412	-6.83326	8.30065e-12	5.7637e-10	ENSG00000106299.8_WASL	ENSG00000106299	WASL	down	YES	NO	-0.333651	0.0204756	0.479536	0.000563452
277.916	0.727896	0.106668	6.82397	8.8557e-12	6.12237e-10	ENSG00000106443.17_PHF14	ENSG00000106443	PHF14	up	YES	YES	0.366569	0.010389	-0.303572	0.0359446
331.147	0.9995	0.146569	6.8193	9.14836e-12	6.24369e-10	ENSG00000080845.19_DLGAP4	ENSG00000080845	DLGAP4	up	YES	NO	0.40668	0.00412546	-0.373653	0.00889637
49.8571	2.19004	0.321182	6.81868	9.18825e-12	6.24369e-10	ENSG00000142235.13_LMTK3	ENSG00000142235	LMTK3	up	YES	NO	0.304778	0.0351778	-0.2677	0.0658378
25.9549	1.8331	0.268823	6.81898	9.1687e-12	6.24369e-10	ENSG00000196793.14_ZNF239	ENSG00000196793	ZNF239	up	YES	NO	0.305814	0.0345302	-0.515618	0.000176412
17.0807	-2.78825	0.40884	-6.8199	9.11056e-12	6.24369e-10	ENSG00000256674.1_RP11-172C16.4	ENSG00000256674	RP11-172C16	down	YES	NO	-0.32695	0.023317	0.590841	9.82032e-06
90.7251	1.15719	0.169795	6.81523	9.41106e-12	6.36789e-10	ENSG00000139266.6_MARCHF9	ENSG00000139266	MARCHF9	up	YES	NO	0.332864	0.0207935	-0.487757	0.000437334
53.4536	-1.60633	0.235773	-6.81303	9.5565e-12	6.4389e-10	ENSG00000176472.10_ZNF575	ENSG00000176472	ZNF575	down	YES	NO	-0.436803	0.00190898	0.468394	0.000786502
50.686	1.29606	0.190418	6.80641	1.00067e-11	6.7138e-10	ENSG00000106125.14_MINDY4	ENSG00000106125	MINDY4	up	YES	NO	0.389376	0.00622962	-0.433788	0.0020686
534.255	2.15138	0.316151	6.80491	1.01111e-11	6.72801e-10	ENSG00000124225.16_PMEPA1	ENSG00000124225	PMEPA1	up	YES	NO	0.388558	0.0063488	-0.394025	0.00558831
83.7632	0.97172	0.142797	6.80489	1.01125e-11	6.72801e-10	ENSG00000136891.14_TEX10	ENSG00000136891	TEX10	up	YES	YES	0.310602	0.0316625	-0.435595	0.00197158
27.3472	2.75372	0.40537	6.79311	1.09744e-11	7.27098e-10	ENSG00000232803.1_SLCO4A1-AS1	ENSG00000232803	SLCO4A1-AS1	up	YES	NO	0.359818	0.012007	-0.446267	0.00147659
762.737	-1.82011	0.268024	-6.79085	1.11476e-11	7.35513e-10	ENSG00000105755.8_ETHE1	ENSG00000105755	ETHE1	down	YES	NO	-0.440053	0.00174927	0.531167	0.000102625
140.06	1.5376	0.226609	6.78524	1.15891e-11	7.61477e-10	ENSG00000128342.5_LIF	ENSG00000128342	LIF	up	YES	NO	0.491719	0.000386162	-0.526563	0.000120813
61.2195	1.70859	0.252037	6.7791	1.20928e-11	7.91305e-10	ENSG00000277496.1_RP11-93B14.9	ENSG00000277496	RP11-93B14	up	YES	NO	0.432707	0.00212868	-0.521922	0.000142075
2329.68	-2.06613	0.305774	-6.75707	1.40808e-11	9.17617e-10	ENSG00000158467.16_AHCYL2	ENSG00000158467	AHCYL2	down	YES	NO	-0.405506	0.00424537	0.487287	0.000443783
29.6217	1.98355	0.293583	6.75635	1.41507e-11	9.18412e-10	ENSG00000179241.13_LDLRAD3	ENSG00000179241	LDLRAD3	up	YES	NO	0.308222	0.0330624	-0.447303	0.00143499
314.536	-0.987789	0.146301	-6.75176	1.46066e-11	9.44144e-10	ENSG00000158109.15_TPRG1L	ENSG00000158109	TPRG1L	down	YES	NO	-0.336734	0.0192698	0.453988	0.00119089
772.715	0.785758	0.116412	6.74978	1.48066e-11	9.53197e-10	ENSG00000101126.18_ADNP	ENSG00000101126	ADNP	up	YES	YES	0.348752	0.0151261	-0.379977	0.00772418
135.234	0.918062	0.13614	6.74352	1.5459e-11	9.7934e-10	ENSG00000107937.19_GTPBP4	ENSG00000107937	GTPBP4	up	YES	NO	0.319593	0.0268104	-0.427772	0.0024229
438.639	-0.925588	0.137234	-6.74458	1.53472e-11	9.7934e-10	ENSG00000119541.10_VPS4B	ENSG00000119541	VPS4B	down	YES	NO	-0.321397	0.0259158	0.442417	0.00164067
511.855	3.87125	0.574058	6.74366	1.54447e-11	9.7934e-10	ENSG00000140807.7_NKD1	ENSG00000140807	NKD1	up	YES	NO	0.329868	0.0220414	-0.380577	0.00762016
226.587	1.47035	0.218034	6.74369	1.54411e-11	9.7934e-10	ENSG00000177426.22_TGIF1	ENSG00000177426	TGIF1	up	YES	NO	0.415508	0.00331517	-0.51824	0.000161305
890.427	-1.06513	0.158253	-6.73055	1.69028e-11	1.06554e-09	ENSG00000120063.10_GNA13	ENSG00000120063	GNA13	down	YES	NO	-0.335468	0.0197575	0.471428	0.000719032
325.589	0.728391	0.108229	6.73011	1.69538e-11	1.06554e-09	ENSG00000171467.16_ZNF318	ENSG00000171467	ZNF318	up	YES	NO	0.335855	0.0196074	-0.474926	0.000647717
1364.53	-0.984591	0.146327	-6.72869	1.71194e-11	1.07172e-09	ENSG00000070214.16_SLC44A1	ENSG00000070214	SLC44A1	down	YES	NO	-0.446538	0.00146559	0.515935	0.000174523
779.755	-1.34302	0.199701	-6.72513	1.75431e-11	1.09393e-09	ENSG00000138600.10_SPPL2A	ENSG00000138600	SPPL2A	down	YES	NO	-0.483661	0.00049657	0.516418	0.000171676
854.613	-1.58167	0.235255	-6.7232	1.77779e-11	1.10424e-09	ENSG00000069849.11_ATP1B3	ENSG00000069849	ATP1B3	down	YES	NO	-0.358817	0.0122644	0.470808	0.000732371
58.8367	1.25819	0.187196	6.72122	1.80214e-11	1.11501e-09	ENSG00000168005.9_SPINDOC	ENSG00000168005	SPINDOC	up	YES	NO	0.41914	0.00302481	-0.454338	0.00117918
171.673	1.01845	0.15154	6.72062	1.80948e-11	1.11521e-09	ENSG00000100105.18_PATZ1	ENSG00000100105	PATZ1	up	YES	NO	0.298727	0.0391655	-0.428341	0.00238724
631.738	2.76163	0.411156	6.71676	1.85807e-11	1.132e-09	ENSG00000114270.18_COL7A1	ENSG00000114270	COL7A1	up	YES	NO	0.341357	0.0175747	-0.503824	0.000261561
26.0526	2.92052	0.434799	6.71693	1.85589e-11	1.132e-09	ENSG00000174951.12_FUT1	ENSG00000174951	FUT1	up	YES	NO	0.408632	0.00393273	-0.447884	0.00141215
1371.98	0.736531	0.109641	6.71765	1.84683e-11	1.132e-09	ENSG00000288701.1_PRRC2B	ENSG00000288701	PRRC2B	up	YES	NO	0.479727	0.000560184	-0.404372	0.00436406
187.082	1.23263	0.183566	6.71488	1.88217e-11	1.1423e-09	ENSG00000161091.14_MFSD12	ENSG00000161091	MFSD12	up	YES	NO	0.2449	0.0934159	-0.488918	0.00042173
58.5663	2.96894	0.442289	6.71266	1.91102e-11	1.15541e-09	ENSG00000088992.18_TESC	ENSG00000088992	TESC	up	YES	NO	0.408693	0.00392677	-0.464911	0.000870915
15.49	2.12074	0.316014	6.71092	1.93401e-11	1.16487e-09	ENSG00000231881.2_RP5-1120P11.3	ENSG00000231881	RP5-1120P11	up	YES	NO	0.26712	0.0664485	-0.373684	0.00889035
347.039	2.22617	0.332082	6.70367	2.03243e-11	1.21953e-09	ENSG00000103257.9_SLC7A5	ENSG00000103257	SLC7A5	up	YES	NO	0.391667	0.005906	-0.417327	0.00316679
29.3199	1.98113	0.295645	6.70103	2.0695e-11	1.23711e-09	ENSG00000114656.12_CFAP92	ENSG00000114656	CFAP92	up	YES	NO	0.340724	0.0177989	-0.39492	0.0054718
123.975	-4.26052	0.636295	-6.69583	2.1445e-11	1.27714e-09	ENSG00000156284.6_CLDN8	ENSG00000156284	CLDN8	down	YES	NO	-0.357744	0.0125455	0.384056	0.00704123
463.934	-1.03263	0.154248	-6.69459	2.16272e-11	1.28318e-09	ENSG00000204370.13_SDHD	ENSG00000204370	SDHD	down	YES	NO	-0.380613	0.00761403	0.582994	1.37309e-05
118.351	-2.54182	0.379885	-6.69101	2.21635e-11	1.31012e-09	ENSG00000162949.16_CAPN13	ENSG00000162949	CAPN13	down	YES	NO	-0.317736	0.027758	0.401799	0.00464418
123.07	3.53673	0.528749	6.68887	2.24897e-11	1.31474e-09	ENSG00000073067.14_CYP2W1	ENSG00000073067	CYP2W1	up	YES	NO	0.259392	0.0750168	-0.411848	0.00363229
1288.34	-2.07349	0.309947	-6.68982	2.2345e-11	1.31474e-09	ENSG00000074410.14_CA12	ENSG00000074410	CA12	down	YES	NO	-0.399712	0.00488275	0.553172	4.55006e-05
22.9235	-2.62607	0.392579	-6.68927	2.24286e-11	1.31474e-09	ENSG00000166819.12_PLIN1	ENSG00000166819	PLIN1	down	YES	NO	-0.369832	0.00967669	0.413329	0.00350091
372.6	1.14679	0.171533	6.68553	2.30092e-11	1.34018e-09	ENSG00000142207.7_URB1	ENSG00000142207	URB1	up	YES	NO	0.379103	0.0078777	-0.386904	0.00659601
72.4103	1.38689	0.207507	6.68355	2.33228e-11	1.34857e-09	ENSG00000067177.15_PHKA1	ENSG00000067177	PHKA1	up	YES	NO	0.384273	0.00700631	-0.445882	0.00149231
105.282	1.97826	0.295987	6.6836	2.33136e-11	1.34857e-09	ENSG00000125378.16_BMP4	ENSG00000125378	BMP4	up	YES	NO	0.391814	0.00588576	-0.414694	0.00338356
476.005	-1.28116	0.191755	-6.68125	2.3692e-11	1.36495e-09	ENSG00000137269.15_LRRC1	ENSG00000137269	LRRC1	down	YES	NO	-0.363261	0.0111567	0.503124	0.000267623
796.168	-1.54083	0.230737	-6.67786	2.42457e-11	1.39181e-09	ENSG00000111802.14_TDP2	ENSG00000111802	TDP2	down	YES	NO	-0.349116	0.0150135	0.503793	0.000261828
38.7443	1.72153	0.257821	6.67723	2.43507e-11	1.39281e-09	ENSG00000197905.10_TEAD4	ENSG00000197905	TEAD4	up	YES	NO	0.282247	0.0519388	-0.358497	0.0123476
937.421	-1.85591	0.278044	-6.67487	2.47459e-11	1.40994e-09	ENSG00000155545.20_MIER3	ENSG00000155545	MIER3	down	YES	NO	-0.381587	0.00744809	0.547182	5.70988e-05
151.268	-1.41607	0.212165	-6.67438	2.48276e-11	1.40994e-09	ENSG00000178537.10_SLC25A20	ENSG00000178537	SLC25A20	down	YES	NO	-0.445368	0.00151354	0.563398	3.05666e-05
697.534	-0.532865	0.0799406	-6.66575	2.63308e-11	1.48999e-09	ENSG00000022840.17_RNF10	ENSG00000022840	RNF10	down	YES	NO	-0.366325	0.010444	0.435393	0.00198225
260.689	-1.17462	0.176262	-6.66405	2.66383e-11	1.50204e-09	ENSG00000130734.10_ATG4D	ENSG00000130734	ATG4D	down	YES	NO	-0.314526	0.0294619	0.401471	0.00468096
32.447	1.99053	0.298861	6.66039	2.73106e-11	1.53451e-09	ENSG00000164542.13_KIAA0895	ENSG00000164542	KIAA0895	up	YES	NO	0.218064	0.136499	-0.389	0.00628416
17.6332	2.31414	0.347608	6.65734	2.78835e-11	1.56118e-09	ENSG00000174939.11_ASPHD1	ENSG00000174939	ASPHD1	up	YES	NO	0.468616	0.000781383	-0.49697	0.000326694
54.4869	2.12291	0.318928	6.65639	2.80643e-11	1.56579e-09	ENSG00000184497.13_TMEM255B	ENSG00000184497	TMEM255B	up	YES	NO	0.305126	0.0349594	-0.334186	0.0202619
48.3764	1.28973	0.193781	6.65561	2.82134e-11	1.5686e-09	ENSG00000077348.9_EXOSC5	ENSG00000077348	EXOSC5	up	YES	YES	0.262895	0.0710309	-0.418259	0.00309315
140.459	-0.913185	0.13723	-6.6544	2.84463e-11	1.57604e-09	ENSG00000099992.16_TBC1D10A	ENSG00000099992	TBC1D10A	down	YES	NO	-0.320801	0.0262087	0.493936	0.000359961
70.4341	1.98017	0.297703	6.65148	2.90165e-11	1.60205e-09	ENSG00000228526.7_MIR34AHG	ENSG00000228526	MIR34AHG	up	YES	NO	0.384023	0.00704647	-0.406262	0.00416776
271.069	1.45254	0.218403	6.65072	2.91659e-11	1.60473e-09	ENSG00000050344.9_NFE2L3	ENSG00000050344	NFE2L3	up	YES	NO	0.295986	0.0410902	-0.345169	0.0162734
229.521	1.95928	0.294627	6.65002	2.93046e-11	1.6068e-09	ENSG00000008300.17_CELSR3	ENSG00000008300	CELSR3	up	YES	NO	0.290634	0.0450716	-0.410737	0.00373374
23.7146	-2.95626	0.444663	-6.64832	2.96453e-11	1.6199e-09	ENSG00000152580.9_IGSF10	ENSG00000152580	IGSF10	down	YES	NO	-0.380412	0.00764865	0.526612	0.000120604
619.048	-1.44785	0.217833	-6.64658	2.99988e-11	1.6336e-09	ENSG00000165806.21_CASP7	ENSG00000165806	CASP7	down	YES	NO	-0.398994	0.00496738	0.471473	0.000718055
184.93	1.11885	0.168379	6.64481	3.03605e-11	1.64765e-09	ENSG00000165138.18_ANKS6	ENSG00000165138	ANKS6	up	YES	NO	0.258543	0.0760092	-0.414724	0.003381
50.5064	-2.44178	0.367666	-6.6413	3.10937e-11	1.6817e-09	ENSG00000138669.10_PRKG2	ENSG00000138669	PRKG2	down	YES	NO	-0.358713	0.0122914	0.419433	0.00300237
360.348	-1.37831	0.207629	-6.63833	3.17267e-11	1.70434e-09	ENSG00000148842.18_CNNM2	ENSG00000148842	CNNM2	down	YES	NO	-0.272823	0.06064	0.389672	0.00618699
1078.19	-1.31294	0.19778	-6.63837	3.17168e-11	1.70434e-09	ENSG00000161714.12_PLCD3	ENSG00000161714	PLCD3	down	YES	NO	-0.390889	0.0060142	0.439413	0.00177975
72.4849	1.25577	0.18931	6.6334	3.28038e-11	1.75627e-09	ENSG00000218891.5_ZNF579	ENSG00000218891	ZNF579	up	YES	NO	0.23844	0.102668	-0.453015	0.00122392
142.596	2.3956	0.361184	6.63264	3.29726e-11	1.75939e-09	ENSG00000090339.9_ICAM1	ENSG00000090339	ICAM1	up	YES	NO	0.371263	0.00937783	-0.361439	0.0116001
110.475	0.989148	0.149231	6.62829	3.39594e-11	1.80598e-09	ENSG00000230124.8_ACBD6	ENSG00000230124	ACBD6	up	YES	NO	0.3437	0.0167648	-0.497891	0.000317168
319.755	3.03887	0.458735	6.62445	3.48537e-11	1.84123e-09	ENSG00000183734.5_ASCL2	ENSG00000183734	ASCL2	up	YES	NO	0.283452	0.0509036	-0.423919	0.00267704
17.4572	-2.1419	0.323332	-6.62446	3.48523e-11	1.84123e-09	ENSG00000253549.6_CA3-AS1	ENSG00000253549	CA3-AS1	down	YES	NO	-0.476009	0.000626952	0.384908	0.0069053
668.842	-1.38235	0.208732	-6.62258	3.5298e-11	1.85852e-09	ENSG00000136044.12_APPL2	ENSG00000136044	APPL2	down	YES	NO	-0.29733	0.0401372	0.399464	0.00491182
194.472	1.36341	0.20591	6.62139	3.55844e-11	1.86742e-09	ENSG00000106348.18_IMPDH1	ENSG00000106348	IMPDH1	up	YES	NO	0.271565	0.0618851	-0.39447	0.00553005
267.458	2.2296	0.336879	6.6184	3.63103e-11	1.89925e-09	ENSG00000160932.11_LY6E	ENSG00000160932	LY6E	up	YES	NO	0.126177	0.392795	-0.421995	0.00281261
734.675	-1.46392	0.221248	-6.61664	3.67449e-11	1.91568e-09	ENSG00000095203.15_EPB41L4B	ENSG00000095203	EPB41L4B	down	YES	NO	-0.383614	0.00711252	0.518354	0.000160677
111.293	2.96925	0.449142	6.61094	3.81889e-11	1.98445e-09	ENSG00000206075.14_SERPINB5	ENSG00000206075	SERPINB5	up	YES	NO	0.365069	0.0107313	-0.367851	0.0101039
248.686	-3.63121	0.550885	-6.5916	4.35114e-11	2.25366e-09	ENSG00000168748.14_CA7	ENSG00000168748	CA7	down	YES	NO	-0.367418	0.0101993	0.48694	0.000448605
523.786	-1.08894	0.165272	-6.58876	4.43506e-11	2.28967e-09	ENSG00000073417.15_PDE8A	ENSG00000073417	PDE8A	down	YES	NO	-0.30126	0.0374538	0.44411	0.00156663
180.562	0.959011	0.145682	6.58292	4.61294e-11	2.3738e-09	ENSG00000135912.11_TTLL4	ENSG00000135912	TTLL4	up	YES	NO	0.267903	0.0656259	-0.510326	0.000210885
214.381	2.0843	0.316753	6.5802	4.69813e-11	2.40984e-09	ENSG00000280109.3_PLAC4	ENSG00000280109	PLAC4	up	YES	NO	0.374086	0.00881146	-0.424642	0.00262763
770.797	-0.824474	0.125451	-6.57211	4.96084e-11	2.53641e-09	ENSG00000075568.17_TMEM131	ENSG00000075568	TMEM131	down	YES	NO	-0.42985	0.00229487	0.421932	0.0028171
651.975	-1.85299	0.282125	-6.56796	5.10096e-11	2.59969e-09	ENSG00000057704.13_TMCC3	ENSG00000057704	TMCC3	down	YES	NO	-0.34519	0.0162666	0.44735	0.00143315
53.5816	1.16008	0.176731	6.56408	5.23537e-11	2.65967e-09	ENSG00000090447.12_TFAP4	ENSG00000090447	TFAP4	up	YES	NO	0.337267	0.0190678	-0.449582	0.00134718
1091.72	-0.977696	0.149009	-6.56132	5.33321e-11	2.68528e-09	ENSG00000010256.11_UQCRC1	ENSG00000010256	UQCRC1	down	YES	NO	-0.481491	0.000530812	0.462079	0.000945456
182.441	1.15019	0.175295	6.56148	5.32765e-11	2.68528e-09	ENSG00000103855.18_CD276	ENSG00000103855	CD276	up	YES	NO	0.31539	0.0289951	-0.470292	0.000743661
187.546	1.31787	0.200857	6.56123	5.33645e-11	2.68528e-09	ENSG00000140263.15_SORD	ENSG00000140263	SORD	up	YES	NO	0.328362	0.0226922	-0.44254	0.00163518
325.219	-0.886311	0.135167	-6.55717	5.48387e-11	2.75076e-09	ENSG00000076513.17_ANKRD13A	ENSG00000076513	ANKRD13A	down	YES	NO	-0.306362	0.0341913	0.428877	0.00235408
38.2848	1.08009	0.164802	6.55386	5.60691e-11	2.80363e-09	ENSG00000184792.16_OSBP2	ENSG00000184792	OSBP2	up	YES	NO	0.439324	0.001784	-0.520615	0.000148652
307.741	-2.32188	0.354349	-6.55254	5.6567e-11	2.81832e-09	ENSG00000166816.15_LDHD	ENSG00000166816	LDHD	down	YES	NO	-0.411478	0.00366578	0.482659	0.000512121
450.853	1.356	0.206955	6.55214	5.67174e-11	2.81832e-09	ENSG00000258366.10_RTEL1	ENSG00000258366	RTEL1	up	YES	NO	0.368949	0.00986507	-0.344868	0.0163731
727.703	-1.25675	0.191897	-6.54905	5.79036e-11	2.8683e-09	ENSG00000071073.13_MGAT4A	ENSG00000071073	MGAT4A	down	YES	NO	-0.414791	0.00337529	0.533667	9.38334e-05
232.706	-1.12409	0.171691	-6.54713	5.86536e-11	2.89349e-09	ENSG00000160746.13_ANO10	ENSG00000160746	ANO10	down	YES	NO	-0.473334	0.000679347	0.553318	4.52468e-05
59.317	-1.69175	0.258407	-6.54682	5.8776e-11	2.89349e-09	ENSG00000176273.15_SLC35G1	ENSG00000176273	SLC35G1	down	YES	NO	-0.459627	0.00101457	0.40504	0.00429374
94.1018	1.69264	0.258608	6.5452	5.94147e-11	2.91591e-09	ENSG00000133131.15_MORC4	ENSG00000133131	MORC4	up	YES	NO	0.430456	0.00225873	-0.356281	0.0129378
242.28	0.835814	0.127733	6.54343	6.01245e-11	2.94166e-09	ENSG00000175931.13_UBE2O	ENSG00000175931	UBE2O	up	YES	NO	0.396664	0.00525054	-0.418335	0.00308719
31.0458	1.22042	0.186576	6.54113	6.10548e-11	2.97801e-09	ENSG00000066697.15_MSANTD3	ENSG00000066697	MSANTD3	up	YES	NO	0.295965	0.0411051	-0.489812	0.00041008
114.723	-2.02666	0.310011	-6.53739	6.26021e-11	3.04415e-09	ENSG00000138678.11_GPAT3	ENSG00000138678	GPAT3	down	YES	NO	-0.458147	0.0010584	0.506887	0.000236455
329.681	0.637563	0.0976088	6.53182	6.49765e-11	3.14998e-09	ENSG00000071564.17_TCF3	ENSG00000071564	TCF3	up	YES	NO	0.4535	0.00120734	-0.512293	0.000197417
124.977	-1.14855	0.17606	-6.52361	6.86368e-11	3.31731e-09	ENSG00000165359.16_INTS6L	ENSG00000165359	INTS6L	down	YES	NO	-0.267972	0.0655536	0.434683	0.00202003
192.773	1.67605	0.257462	6.50991	7.51938e-11	3.6232e-09	ENSG00000139629.16_GALNT6	ENSG00000139629	GALNT6	up	YES	NO	0.339759	0.0181457	-0.389736	0.00617783
892.211	-1.1886	0.182598	-6.50941	7.54478e-11	3.62446e-09	ENSG00000144426.19_NBEAL1	ENSG00000144426	NBEAL1	down	YES	NO	-0.258994	0.0754808	0.434759	0.00201595
3420.85	-1.2065	0.185418	-6.50694	7.66952e-11	3.67279e-09	ENSG00000172270.22_BSG	ENSG00000172270	BSG	down	YES	NO	-0.406956	0.00409769	0.446889	0.00145149
281.61	1.59334	0.244884	6.50651	7.69158e-11	3.67279e-09	ENSG00000179403.12_VWA1	ENSG00000179403	VWA1	up	YES	NO	0.242927	0.0961703	-0.404507	0.0043497
69.5929	1.32193	0.203197	6.50567	7.73501e-11	3.68247e-09	ENSG00000107815.10_TWNK	ENSG00000107815	TWNK	up	YES	NO	0.371424	0.00934456	-0.42175	0.00283024
194.007	-1.01842	0.156577	-6.50423	7.8093e-11	3.70674e-09	ENSG00000078124.13_ACER3	ENSG00000078124	ACER3	down	YES	NO	-0.381866	0.00740105	0.527058	0.000118726
250.586	-1.40065	0.21536	-6.50377	7.83329e-11	3.70706e-09	ENSG00000171503.13_ETFDH	ENSG00000171503	ETFDH	down	YES	NO	-0.429634	0.00230793	0.573767	2.01429e-05
26.4635	3.36673	0.517806	6.50192	7.93016e-11	3.74177e-09	ENSG00000113739.11_STC2	ENSG00000113739	STC2	up	YES	NO	0.296183	0.0409498	-0.366956	0.0103021
196.739	-0.981355	0.150976	-6.50006	8.02894e-11	3.77716e-09	ENSG00000158006.14_PAFAH2	ENSG00000158006	PAFAH2	down	YES	NO	-0.35431	0.0134826	0.444083	0.00156775
173.356	2.18709	0.336585	6.49787	8.14625e-11	3.82105e-09	ENSG00000104728.16_ARHGEF10	ENSG00000104728	ARHGEF10	up	YES	NO	0.150449	0.307402	-0.347692	0.0154582
596.656	1.02382	0.157677	6.49317	8.40482e-11	3.93074e-09	ENSG00000103222.20_ABCC1	ENSG00000103222	ABCC1	up	YES	YES	0.377322	0.00819885	-0.383945	0.00705913
514.407	-0.955065	0.147105	-6.4924	8.44769e-11	3.9392e-09	ENSG00000052795.13_FNIP2	ENSG00000052795	FNIP2	down	YES	NO	-0.361702	0.0115351	0.491707	0.000386313
184.363	3.13245	0.48271	6.48931	8.62283e-11	4.00911e-09	ENSG00000102854.16_MSLN	ENSG00000102854	MSLN	up	YES	NO	0.250861	0.0854646	-0.431395	0.00220365
22.8759	1.76843	0.27256	6.48821	8.68641e-11	4.0269e-09	ENSG00000179598.6_PLD6	ENSG00000179598	PLD6	up	YES	NO	0.207515	0.15699	-0.463502	0.000907335
385.315	-1.9745	0.304474	-6.48496	8.87558e-11	4.10263e-09	ENSG00000278535.5_DHRS11	ENSG00000278535	DHRS11	down	YES	NO	-0.384815	0.00692003	0.522022	0.000141582
275.146	0.896689	0.138333	6.4821	9.04553e-11	4.16907e-09	ENSG00000044090.12_CUL7	ENSG00000044090	CUL7	up	YES	NO	0.458332	0.00105285	-0.538375	7.91147e-05
500.642	1.21013	0.186738	6.48037	9.1497e-11	4.20489e-09	ENSG00000084774.14_CAD	ENSG00000084774	CAD	up	YES	NO	0.262535	0.071432	-0.409659	0.00383452
38.3838	1.18071	0.182235	6.47905	9.23003e-11	4.22959e-09	ENSG00000108479.13_GALK1	ENSG00000108479	GALK1	up	YES	NO	0.339684	0.0181728	-0.421806	0.00282622
30.0271	2.13448	0.329519	6.47757	9.32136e-11	4.25917e-09	ENSG00000167207.14_NOD2	ENSG00000167207	NOD2	up	YES	NO	0.496226	0.000334586	-0.428734	0.00236288
634.575	-2.37125	0.366214	-6.47505	9.47836e-11	4.31849e-09	ENSG00000114455.13_HHLA2	ENSG00000114455	HHLA2	down	YES	NO	-0.336571	0.0193322	0.52461	0.00012938
142.68	0.92422	0.142815	6.47147	9.70552e-11	4.40935e-09	ENSG00000215012.9_RTL10	ENSG00000215012	RTL10	up	YES	NO	0.316001	0.0286684	-0.362633	0.0113077
55.6279	1.85176	0.286251	6.46899	9.86603e-11	4.46951e-09	ENSG00000109089.7_CDR2L	ENSG00000109089	CDR2L	up	YES	NO	0.374838	0.0086656	-0.34808	0.015336
189.745	-1.08073	0.167167	-6.465	1.01298e-10	4.57596e-09	ENSG00000175348.11_TMEM9B	ENSG00000175348	TMEM9B	down	YES	NO	-0.487632	0.000439031	0.45671	0.00110261
575.472	0.610495	0.0944537	6.46343	1.02356e-10	4.61066e-09	ENSG00000089280.19_FUS	ENSG00000089280	FUS	up	YES	NO	0.377449	0.00817556	-0.363063	0.0112042
36.2959	1.69977	0.263009	6.46278	1.02797e-10	4.61743e-09	ENSG00000146426.19_TIAM2	ENSG00000146426	TIAM2	up	YES	NO	0.434524	0.00202863	-0.317268	0.0280013
152.873	-1.19404	0.184887	-6.45822	1.05945e-10	4.74544e-09	ENSG00000167130.18_DOLPP1	ENSG00000167130	DOLPP1	down	YES	NO	-0.41826	0.00309305	0.493123	0.000369377
244.962	1.27123	0.196977	6.45372	1.09137e-10	4.87469e-09	ENSG00000052749.14_RRP12	ENSG00000052749	RRP12	up	YES	NO	0.395711	0.00537044	-0.391006	0.00599785
257.5	0.995495	0.154387	6.44805	1.13297e-10	5.04631e-09	ENSG00000124571.18_XPO5	ENSG00000124571	XPO5	up	YES	NO	0.305226	0.0348967	-0.394457	0.00553184
42.4068	0.737591	0.114403	6.44729	1.1387e-10	5.04704e-09	ENSG00000162910.19_MRPL55	ENSG00000162910	MRPL55	up	YES	NO	0.339018	0.0184158	-0.493419	0.00036592
423.683	-0.968215	0.150176	-6.44718	1.13948e-10	5.04704e-09	ENSG00000176340.4_COX8A	ENSG00000176340	COX8A	down	YES	NO	-0.479767	0.000559502	0.502319	0.000274757
188.862	0.789611	0.122585	6.44134	1.18422e-10	5.23064e-09	ENSG00000147130.14_ZMYM3	ENSG00000147130	ZMYM3	up	YES	YES	0.421025	0.00288319	-0.397419	0.00515734
90.3953	1.66969	0.259351	6.43795	1.21097e-10	5.33397e-09	ENSG00000174938.15_SEZ6L2	ENSG00000174938	SEZ6L2	up	YES	NO	0.323147	0.0250719	-0.421473	0.00285036
124.831	-0.598697	0.0930543	-6.43384	1.24416e-10	5.46502e-09	ENSG00000140153.18_WDR20	ENSG00000140153	WDR20	down	YES	NO	-0.293604	0.0428251	0.408236	0.00397109
73.1108	-1.40057	0.217814	-6.4301	1.27516e-10	5.58578e-09	ENSG00000272686.1_WASL-DT	ENSG00000272686	WASL-DT	down	YES	NO	-0.399853	0.00486633	0.449558	0.00134809
149.074	-0.871857	0.135743	-6.42286	1.33741e-10	5.84234e-09	ENSG00000204564.12_C6orf136	ENSG00000204564	C6orf136	down	YES	NO	-0.270299	0.0631585	0.538846	7.77631e-05
32.2285	1.12094	0.174611	6.41965	1.36592e-10	5.95055e-09	ENSG00000133627.18_ACTR3B	ENSG00000133627	ACTR3B	up	YES	YES	0.363272	0.011154	-0.364649	0.0108288
758.72	-1.08811	0.169624	-6.41481	1.40997e-10	6.12567e-09	ENSG00000090020.11_SLC9A1	ENSG00000090020	SLC9A1	down	YES	NO	-0.384336	0.00699624	0.477678	0.000596157
134.837	1.87405	0.292183	6.41397	1.41778e-10	6.1428e-09	ENSG00000101104.13_PABPC1L	ENSG00000101104	PABPC1L	up	YES	NO	0.403489	0.00445837	-0.35996	0.0119708
93.3018	1.42639	0.222582	6.40839	1.47067e-10	6.35463e-09	ENSG00000091127.14_PUS7	ENSG00000091127	PUS7	up	YES	NO	0.341205	0.0176284	-0.380248	0.00767708
208.623	-2.7151	0.423745	-6.40738	1.48042e-10	6.37946e-09	ENSG00000165449.12_SLC16A9	ENSG00000165449	SLC16A9	down	YES	NO	-0.406134	0.00418084	0.509443	0.000217203
1410.73	-1.66395	0.259798	-6.40475	1.50612e-10	6.47263e-09	ENSG00000169116.11_PARM1	ENSG00000169116	PARM1	down	YES	NO	-0.386985	0.00658371	0.518563	0.000159529
166.567	-1.21258	0.18949	-6.3992	1.56198e-10	6.69462e-09	ENSG00000171100.15_MTM1	ENSG00000171100	MTM1	down	YES	NO	-0.305829	0.0345209	0.478191	0.000586966
50.0814	3.52295	0.550861	6.39536	1.6017e-10	6.8464e-09	ENSG00000139515.6_PDX1	ENSG00000139515	PDX1	up	YES	NO	0.407171	0.00407615	-0.420984	0.00288615
168.61	1.75807	0.274938	6.39442	1.61157e-10	6.87013e-09	ENSG00000158352.17_SHROOM4	ENSG00000158352	SHROOM4	up	YES	NO	0.296078	0.0410243	-0.372757	0.00907428
104.615	1.52875	0.23917	6.39187	1.63868e-10	6.96702e-09	ENSG00000184428.13_TOP1MT	ENSG00000184428	TOP1MT	up	YES	NO	0.433026	0.0021108	-0.40128	0.00470248
32.6752	-1.33511	0.208954	-6.38952	1.66409e-10	7.05621e-09	ENSG00000264575.1_LINC00526	ENSG00000264575	LINC00526	down	YES	NO	-0.376272	0.00839348	0.432378	0.00214726
850.956	-1.04516	0.163632	-6.38724	1.68912e-10	7.14326e-09	ENSG00000164976.9_MYORG	ENSG00000164976	MYORG	down	YES	NO	-0.45552	0.00114047	0.50636	0.000240608
47.9588	3.2007	0.501151	6.3867	1.69504e-10	7.14928e-09	ENSG00000119535.18_CSF3R	ENSG00000119535	CSF3R	up	YES	NO	0.29714	0.0402712	-0.353004	0.0138544
62.4486	-1.12277	0.175814	-6.38613	1.70141e-10	7.15717e-09	ENSG00000070759.17_TESK2	ENSG00000070759	TESK2	down	YES	NO	-0.170529	0.246525	0.414071	0.00343667
385.394	-0.993686	0.155683	-6.38276	1.73926e-10	7.29709e-09	ENSG00000162104.10_ADCY9	ENSG00000162104	ADCY9	down	YES	NO	-0.342166	0.0172915	0.519199	0.000156085
314.113	-1.32423	0.207489	-6.38217	1.74594e-10	7.30586e-09	ENSG00000243646.10_IL10RB	ENSG00000243646	IL10RB	down	YES	NO	-0.411739	0.00364215	0.432415	0.00214514
129.088	1.56428	0.245198	6.37966	1.77479e-10	7.40708e-09	ENSG00000101412.13_E2F1	ENSG00000101412	E2F1	up	YES	NO	0.29268	0.0435141	-0.339833	0.0181188
289.313	-0.856985	0.134354	-6.37855	1.78776e-10	7.44167e-09	ENSG00000120053.12_GOT1	ENSG00000120053	GOT1	down	YES	NO	-0.299509	0.0386301	0.455757	0.00113283
641.028	0.693751	0.108832	6.3745	1.8356e-10	7.62087e-09	ENSG00000090621.15_PABPC4	ENSG00000090621	PABPC4	up	YES	NO	0.403364	0.0044719	-0.360896	0.0117349
178.411	1.05532	0.165582	6.37341	1.84875e-10	7.65545e-09	ENSG00000187678.10_SPRY4	ENSG00000187678	SPRY4	up	YES	NO	0.417336	0.00316613	-0.42112	0.0028762
245.437	1.0161	0.159449	6.37254	1.85923e-10	7.67885e-09	ENSG00000136141.15_LRCH1	ENSG00000136141	LRCH1	up	YES	NO	0.326263	0.0236262	-0.344235	0.0165846
203.052	1.64247	0.257804	6.37101	1.87789e-10	7.73583e-09	ENSG00000196155.13_PLEKHG4	ENSG00000196155	PLEKHG4	up	YES	NO	0.187157	0.202744	-0.354863	0.0133279
17.5986	-2.7606	0.433555	-6.36735	1.92324e-10	7.9022e-09	ENSG00000183476.13_SH2D7	ENSG00000183476	SH2D7	down	YES	NO	-0.276861	0.0567784	0.332041	0.02113
53.7355	0.964483	0.151516	6.36556	1.94574e-10	7.95353e-09	ENSG00000132330.18_SCLY	ENSG00000132330	SCLY	up	YES	NO	0.231935	0.112683	-0.349445	0.0149123
29.283	1.80384	0.283361	6.36589	1.94159e-10	7.95353e-09	ENSG00000149633.12_KIAA1755	ENSG00000149633	KIAA1755	up	YES	NO	0.226503	0.121601	-0.271907	0.0615445
37.1454	1.13448	0.178297	6.36284	1.98055e-10	8.07507e-09	ENSG00000124588.22_NQO2	ENSG00000124588	NQO2	up	YES	NO	0.287497	0.0475482	-0.42528	0.00258474
69.5062	1.18821	0.18676	6.36224	1.98831e-10	8.08594e-09	ENSG00000165724.6_ZMYND19	ENSG00000165724	ZMYND19	up	YES	NO	0.278956	0.0548544	-0.395869	0.00535044
121.756	0.67765	0.10653	6.36113	2.00271e-10	8.12375e-09	ENSG00000198455.5_ZXDB	ENSG00000198455	ZXDB	up	YES	NO	0.30723	0.0336607	-0.47279	0.000690462
222.917	0.919911	0.144637	6.36015	2.01561e-10	8.15526e-09	ENSG00000130559.19_CAMSAP1	ENSG00000130559	CAMSAP1	up	YES	NO	0.445907	0.00149129	-0.46886	0.000775769
1241.98	2.03479	0.320086	6.357	2.05725e-10	8.30263e-09	ENSG00000108375.13_RNF43	ENSG00000108375	RNF43	up	YES	NO	0.338751	0.018514	-0.362332	0.0113807
10.385	2.3916	0.376338	6.35492	2.08531e-10	8.39458e-09	ENSG00000107807.13_TLX1	ENSG00000107807	TLX1	up	YES	NO	0.214825	0.142567	-0.290471	0.0451982
2344.47	-1.6983	0.26736	-6.35213	2.12355e-10	8.52692e-09	ENSG00000172831.14_CES2	ENSG00000172831	CES2	down	YES	NO	-0.40268	0.00454646	0.519074	0.000156758
19.3351	2.76674	0.43568	6.3504	2.14755e-10	8.60156e-09	ENSG00000175592.9_FOSL1	ENSG00000175592	FOSL1	up	YES	NO	0.496766	0.00032884	-0.427407	0.00244604
2055.44	-1.78669	0.281465	-6.34781	2.184e-10	8.72555e-09	ENSG00000089356.19_FXYD3	ENSG00000089356	FXYD3	down	YES	NO	-0.419946	0.0029635	0.482163	0.000519982
30.0675	-2.60638	0.410759	-6.34528	2.22019e-10	8.84795e-09	ENSG00000164199.18_ADGRV1	ENSG00000164199	ADGRV1	down	YES	NO	-0.300998	0.0376276	0.464362	0.000884957
173.43	-1.26069	0.198997	-6.33522	2.37006e-10	9.42157e-09	ENSG00000137936.18_BCAR3	ENSG00000137936	BCAR3	down	YES	NO	-0.333871	0.0203874	0.478552	0.000580556
328.706	0.965316	0.152564	6.32727	2.49534e-10	9.89487e-09	ENSG00000197961.12_ZNF121	ENSG00000197961	ZNF121	up	YES	NO	0.308485	0.032905	-0.390182	0.00611414
1107.15	-1.54539	0.244357	-6.32432	2.54356e-10	1.0061e-08	ENSG00000138193.16_PLCE1	ENSG00000138193	PLCE1	down	YES	NO	-0.373674	0.00889229	0.560222	3.46349e-05
298.715	-0.69898	0.110555	-6.32244	2.57458e-10	1.01584e-08	ENSG00000087111.21_PIGS	ENSG00000087111	PIGS	down	YES	NO	-0.458885	0.00103635	0.442111	0.00165436
59.0653	-1.71859	0.271847	-6.32189	2.58391e-10	1.017e-08	ENSG00000135437.10_RDH5	ENSG00000135437	RDH5	down	YES	NO	-0.394757	0.00549286	0.480067	0.000554415
328.203	-1.55622	0.24627	-6.31915	2.63003e-10	1.03237e-08	ENSG00000181826.10_RELL1	ENSG00000181826	RELL1	down	YES	NO	-0.329256	0.0223039	0.470124	0.000747369
32.1126	2.85415	0.451692	6.3188	2.63594e-10	1.03237e-08	ENSG00000280055.2_TMEM75	ENSG00000280055	TMEM75	up	YES	NO	0.370807	0.0094721	-0.348534	0.0151937
183.527	1.31659	0.208562	6.31268	2.74248e-10	1.07145e-08	ENSG00000085117.12_CD82	ENSG00000085117	CD82	up	YES	NO	0.284764	0.0497949	-0.320787	0.0262155
564.386	-1.15404	0.182891	-6.31002	2.79006e-10	1.08737e-08	ENSG00000070961.16_ATP2B1	ENSG00000070961	ATP2B1	down	YES	NO	-0.438182	0.00183971	0.56584	2.77423e-05
519.368	1.64199	0.260286	6.30839	2.81947e-10	1.09615e-08	ENSG00000196352.16_CD55	ENSG00000196352	CD55	up	YES	NO	0.274649	0.058868	-0.319717	0.0267481
364.467	1.54479	0.244967	6.3061	2.86153e-10	1.10979e-08	ENSG00000164171.11_ITGA2	ENSG00000164171	ITGA2	up	YES	NO	0.277095	0.0565612	-0.373429	0.00894055
363.161	-1.86109	0.295554	-6.29693	3.03598e-10	1.17458e-08	ENSG00000135678.12_CPM	ENSG00000135678	CPM	down	YES	NO	-0.385086	0.0068772	0.443558	0.00159044
205.183	0.96699	0.153657	6.29319	3.10998e-10	1.1988e-08	ENSG00000122547.11_EEPD1	ENSG00000122547	EEPD1	up	YES	NO	0.331753	0.0212492	-0.558693	3.67655e-05
463.902	-0.881541	0.140083	-6.29301	3.11368e-10	1.1988e-08	ENSG00000171475.14_WIPF2	ENSG00000171475	WIPF2	down	YES	NO	-0.328203	0.0227619	0.424491	0.00263787
8.67963	1.90683	0.303369	6.28553	3.26744e-10	1.25496e-08	ENSG00000171224.9_FAM241B	ENSG00000171224	FAM241B	up	YES	NO	0.429675	0.00230542	-0.402796	0.00453382
156.727	0.61682	0.0981435	6.28488	3.28109e-10	1.25717e-08	ENSG00000159267.17_HLCS	ENSG00000159267	HLCS	up	YES	YES	0.35157	0.0142727	-0.416128	0.00326397
990.688	-1.84141	0.293021	-6.28424	3.29469e-10	1.25878e-08	ENSG00000075142.14_SRI	ENSG00000075142	SRI	down	YES	NO	-0.426398	0.00251099	0.491838	0.000384716
748.319	-0.994847	0.158316	-6.28393	3.30111e-10	1.25878e-08	ENSG00000102882.12_MAPK3	ENSG00000102882	MAPK3	down	YES	NO	-0.37917	0.00786585	0.486848	0.000449892
149.717	-1.55284	0.247398	-6.27669	3.45862e-10	1.31568e-08	ENSG00000079335.20_CDC14A	ENSG00000079335	CDC14A	down	YES	NO	-0.213851	0.144429	0.417347	0.0031652
18.6487	1.93304	0.308302	6.26997	3.61108e-10	1.3704e-08	ENSG00000224430.2_MKRN5P	ENSG00000224430	MKRN5P	up	YES	NO	0.273202	0.0602684	-0.366434	0.0104193
273.514	2.20565	0.351876	6.26827	3.65074e-10	1.38215e-08	ENSG00000135074.16_ADAM19	ENSG00000135074	ADAM19	up	YES	NO	0.44006	0.00174894	-0.356221	0.0129541
178.333	-2.59751	0.414547	-6.26592	3.70638e-10	1.39989e-08	ENSG00000100604.13_CHGA	ENSG00000100604	CHGA	down	YES	NO	-0.315477	0.0289483	0.42782	0.00241989
260.221	-0.939208	0.149901	-6.26553	3.71566e-10	1.40007e-08	ENSG00000093167.18_LRRFIP2	ENSG00000093167	LRRFIP2	down	YES	NO	-0.272148	0.0613049	0.460857	0.000979361
341.457	1.95462	0.311988	6.26506	3.7269e-10	1.40098e-08	ENSG00000082512.15_TRAF5	ENSG00000082512	TRAF5	up	YES	NO	0.290723	0.0450033	-0.38523	0.00685467
385.612	-2.19907	0.351147	-6.26254	3.78764e-10	1.42045e-08	ENSG00000006747.15_SCIN	ENSG00000006747	SCIN	down	YES	NO	-0.356658	0.0128355	0.491493	0.000388932
120.584	0.897997	0.14342	6.26131	3.81769e-10	1.42835e-08	ENSG00000001497.18_LAS1L	ENSG00000001497	LAS1L	up	YES	YES	0.295666	0.0413201	-0.330971	0.0215749
1220.93	-1.02531	0.163823	-6.25862	3.88404e-10	1.44977e-08	ENSG00000120137.7_PANK3	ENSG00000120137	PANK3	down	YES	NO	-0.326832	0.02337	0.522979	0.000136953
637.669	-0.955352	0.152675	-6.25741	3.91424e-10	1.45762e-08	ENSG00000154518.10_ATP5MC3	ENSG00000154518	ATP5MC3	down	YES	NO	-0.462748	0.000927342	0.437799	0.00185873
310.938	-0.700578	0.112026	-6.25372	4.00787e-10	1.489e-08	ENSG00000196850.6_PPTC7	ENSG00000196850	PPTC7	down	YES	NO	-0.258687	0.0758401	0.470214	0.000745372
83.4423	1.55821	0.249278	6.25088	4.08137e-10	1.51277e-08	ENSG00000175602.4_CCDC85B	ENSG00000175602	CCDC85B	up	YES	NO	0.247069	0.0904587	-0.429888	0.00229262
69.669	2.41009	0.385883	6.24565	4.22042e-10	1.56067e-08	ENSG00000182472.9_CAPN12	ENSG00000182472	CAPN12	up	YES	NO	0.203511	0.165331	-0.272884	0.0605799
26.3748	2.11449	0.33866	6.2437	4.27352e-10	1.57664e-08	ENSG00000183386.10_FHL3	ENSG00000183386	FHL3	up	YES	NO	0.298465	0.0393465	-0.416944	0.00319761
308.96	-1.77368	0.284376	-6.23708	4.4582e-10	1.64097e-08	ENSG00000196502.12_SULT1A1	ENSG00000196502	SULT1A1	down	YES	NO	-0.380171	0.00769045	0.442127	0.00165366
77.1958	0.929872	0.149146	6.23465	4.52782e-10	1.66275e-08	ENSG00000083093.10_PALB2	ENSG00000083093	PALB2	up	YES	NO	0.326167	0.0236694	-0.400102	0.00483739
2787.28	-1.26044	0.202433	-6.22644	4.7714e-10	1.74816e-08	ENSG00000074755.15_ZZEF1	ENSG00000074755	ZZEF1	down	YES	NO	-0.325912	0.0237855	0.396299	0.00529617
281.692	-1.63982	0.26342	-6.22511	4.81203e-10	1.75899e-08	ENSG00000082397.18_EPB41L3	ENSG00000082397	EPB41L3	down	YES	NO	-0.36811	0.010047	0.542155	6.88573e-05
51.2115	2.06945	0.3327	6.22016	4.96645e-10	1.81127e-08	ENSG00000265148.6_TSPOAP1-AS1	ENSG00000265148	TSPOAP1-AS1	up	YES	NO	0.353361	0.013752	-0.3185	0.027365
1038.41	-1.16761	0.187727	-6.21972	4.98055e-10	1.81226e-08	ENSG00000137501.17_SYTL2	ENSG00000137501	SYTL2	down	YES	NO	-0.419146	0.00302435	0.437226	0.00188751
100.52	4.47113	0.719222	6.21662	5.07973e-10	1.84413e-08	ENSG00000118785.15_SPP1	ENSG00000118785	SPP1	up	YES	NO	0.14987	0.309289	-0.358788	0.0122719
116.401	1.32368	0.213034	6.21344	5.18383e-10	1.87763e-08	ENSG00000177732.9_SOX12	ENSG00000177732	SOX12	up	YES	NO	0.297396	0.0400911	-0.421391	0.00285634
425.67	-0.713784	0.114934	-6.21039	5.2854e-10	1.91007e-08	ENSG00000141385.11_AFG3L2	ENSG00000141385	AFG3L2	down	YES	NO	-0.459051	0.00103144	0.317059	0.0281106
54.9853	1.50187	0.241859	6.20967	5.30961e-10	1.91447e-08	ENSG00000143067.5_ZNF697	ENSG00000143067	ZNF697	up	YES	NO	0.380468	0.00763902	-0.408859	0.00391081
366.058	-1.13295	0.182487	-6.20841	5.35224e-10	1.92548e-08	ENSG00000198160.15_MIER1	ENSG00000198160	MIER1	down	YES	NO	-0.395384	0.00541214	0.508687	0.000222745
66.9823	2.04875	0.330145	6.2056	5.44878e-10	1.95578e-08	ENSG00000174307.7_PHLDA3	ENSG00000174307	PHLDA3	up	YES	NO	0.201205	0.170276	-0.288504	0.0467413
180.765	0.930929	0.150172	6.19909	5.67897e-10	2.03381e-08	ENSG00000072864.16_NDE1	ENSG00000072864	NDE1	up	YES	NO	0.411358	0.0036767	-0.427235	0.00245698
40.4848	-1.75975	0.283892	-6.19867	5.69436e-10	2.03474e-08	ENSG00000203739.4_PRDX6-AS1	ENSG00000203739	PRDX6-AS1	down	YES	NO	-0.22729	0.120276	0.365926	0.0105346
255.532	1.15303	0.186044	6.19761	5.73272e-10	2.04386e-08	ENSG00000101361.17_NOP56	ENSG00000101361	NOP56	up	YES	NO	0.338227	0.0187079	-0.4149	0.00336608
107.874	1.51116	0.243849	6.19711	5.75096e-10	2.04577e-08	ENSG00000168268.11_NT5DC2	ENSG00000168268	NT5DC2	up	YES	NO	0.377023	0.00825395	-0.325921	0.0237812
147.501	0.716046	0.115593	6.19453	5.84591e-10	2.07491e-08	ENSG00000047230.15_CTPS2	ENSG00000047230	CTPS2	up	YES	NO	0.26591	0.0677358	-0.377831	0.00810601
468.624	-0.722171	0.116614	-6.19283	5.90936e-10	2.09276e-08	ENSG00000182197.13_EXT1	ENSG00000182197	EXT1	down	YES	NO	-0.274029	0.0594655	0.458146	0.00105844
758.714	-2.15244	0.347617	-6.19199	5.94111e-10	2.09932e-08	ENSG00000164120.14_HPGD	ENSG00000164120	HPGD	down	YES	NO	-0.375296	0.00857796	0.498213	0.000313892
981.144	-1.70681	0.275817	-6.18819	6.0859e-10	2.14572e-08	ENSG00000109814.12_UGDH	ENSG00000109814	UGDH	down	YES	NO	-0.414219	0.00342393	0.483307	0.000502027
440.272	-1.89702	0.306598	-6.18733	6.11904e-10	2.15263e-08	ENSG00000138744.16_NAAA	ENSG00000138744	NAAA	down	YES	NO	-0.335067	0.0199141	0.423153	0.00273032
222.027	-2.95107	0.47721	-6.18401	6.24937e-10	2.19363e-08	ENSG00000196660.11_SLC30A10	ENSG00000196660	SLC30A10	down	YES	NO	-0.342325	0.0172362	0.50737	0.000232705
129.929	0.908832	0.147032	6.18118	6.36229e-10	2.22834e-08	ENSG00000086712.13_TXLNG	ENSG00000086712	TXLNG	up	YES	NO	0.301024	0.0376102	-0.360035	0.0119518
50.1238	1.11339	0.180187	6.17907	6.44793e-10	2.25337e-08	ENSG00000112578.10_BYSL	ENSG00000112578	BYSL	up	YES	NO	0.36242	0.0113595	-0.4252	0.00259004
573.645	-0.740963	0.119927	-6.17844	6.47368e-10	2.25741e-08	ENSG00000180530.11_NRIP1	ENSG00000180530	NRIP1	down	YES	NO	-0.292509	0.0436425	0.512045	0.000199071
1248.53	2.34345	0.379341	6.17768	6.50509e-10	2.2634e-08	ENSG00000090382.7_LYZ	ENSG00000090382	LYZ	up	YES	NO	0.385285	0.0068459	-0.386125	0.00671525
36.9857	1.27418	0.206275	6.17708	6.52988e-10	2.26706e-08	ENSG00000138101.19_DTNB	ENSG00000138101	DTNB	up	YES	NO	0.330268	0.0218713	-0.521399	0.000144675
57.2461	1.68859	0.273406	6.17614	6.56897e-10	2.27567e-08	ENSG00000261373.1_VPS9D1-AS1	ENSG00000261373	VPS9D1-AS1	up	YES	NO	0.377843	0.00810371	-0.299502	0.038635
544.5	-1.94565	0.315113	-6.17447	6.63847e-10	2.29474e-08	ENSG00000172572.7_PDE3A	ENSG00000172572	PDE3A	down	YES	NO	-0.377298	0.0082032	0.471986	0.000707192
894.657	-1.8488	0.299469	-6.1736	6.6751e-10	2.3024e-08	ENSG00000078804.13_TP53INP2	ENSG00000078804	TP53INP2	down	YES	NO	-0.35245	0.0140148	0.513073	0.000192295
267.107	0.841904	0.136382	6.17311	6.69578e-10	2.30454e-08	ENSG00000133422.14_MORC2	ENSG00000133422	MORC2	up	YES	NO	0.347428	0.0155419	-0.500674	0.000289876
24.8237	3.31372	0.536837	6.17266	6.71502e-10	2.30617e-08	ENSG00000154928.19_EPHB1	ENSG00000154928	EPHB1	up	YES	NO	0.355316	0.0132022	-0.3167	0.0282989
644.297	0.71601	0.116037	6.17051	6.80699e-10	2.33272e-08	ENSG00000124795.17_DEK	ENSG00000124795	DEK	up	YES	YES	0.191849	0.19145	-0.363246	0.0111601
92.55	0.931487	0.150969	6.17006	6.82629e-10	2.3343e-08	ENSG00000188707.6_ZBED6CL	ENSG00000188707	ZBED6CL	up	YES	NO	0.147174	0.318172	-0.393416	0.005669
309.173	1.66757	0.270302	6.16929	6.8599e-10	2.34076e-08	ENSG00000163191.6_S100A11	ENSG00000163191	S100A11	up	YES	NO	0.318597	0.0273153	-0.373077	0.00901043
116.217	-0.986293	0.159923	-6.16729	6.94701e-10	2.3654e-08	ENSG00000144040.13_SFXN5	ENSG00000144040	SFXN5	down	YES	NO	-0.296113	0.0409994	0.472723	0.000691833
265.104	0.644532	0.104554	6.16458	7.06699e-10	2.40112e-08	ENSG00000130382.9_MLLT1	ENSG00000130382	MLLT1	up	YES	YES	0.405476	0.00424841	-0.338517	0.0186004
291.42	-1.4607	0.236964	-6.16422	7.08319e-10	2.40149e-08	ENSG00000197375.13_SLC22A5	ENSG00000197375	SLC22A5	down	YES	NO	-0.396321	0.00529351	0.44286	0.00162099
19.0387	1.88875	0.306811	6.15606	7.4579e-10	2.52315e-08	ENSG00000184949.18_FAM227A	ENSG00000184949	FAM227A	up	YES	NO	0.369825	0.00967812	-0.467924	0.000797435
38.7962	0.962332	0.156368	6.15427	7.54221e-10	2.54626e-08	ENSG00000156469.9_MTERF3	ENSG00000156469	MTERF3	up	YES	NO	0.201381	0.169896	-0.488199	0.00043133
1092.56	-1.19219	0.193864	-6.14962	7.76682e-10	2.61653e-08	ENSG00000172380.6_GNG12	ENSG00000172380	GNG12	down	YES	NO	-0.341588	0.0174935	0.459522	0.0010176
76.6234	-2.27519	0.37061	-6.13905	8.30185e-10	2.79086e-08	ENSG00000162461.8_SLC25A34	ENSG00000162461	SLC25A34	down	YES	NO	-0.435969	0.00195202	0.497635	0.000319787
20.4163	-1.72381	0.280885	-6.13705	8.40669e-10	2.82014e-08	ENSG00000287458.1_RP3-340B19.7	ENSG00000287458	RP3-340B19	down	YES	NO	-0.248925	0.087987	0.533468	9.45083e-05
281.801	-0.644314	0.105016	-6.13539	8.49483e-10	2.84371e-08	ENSG00000137275.16_RIPK1	ENSG00000137275	RIPK1	down	YES	NO	-0.482467	0.000515164	0.395379	0.00541275
495.702	-0.997451	0.162697	-6.13072	8.74842e-10	2.92245e-08	ENSG00000159720.12_ATP6V0D1	ENSG00000159720	ATP6V0D1	down	YES	NO	-0.399317	0.0049292	0.47899	0.000572897
135.972	1.02647	0.16747	6.12928	8.8275e-10	2.93653e-08	ENSG00000126226.22_PCID2	ENSG00000126226	PCID2	up	YES	NO	0.308453	0.0329244	-0.361456	0.0115957
33.8916	3.22469	0.526102	6.1294	8.82128e-10	2.93653e-08	ENSG00000171004.18_HS6ST2	ENSG00000171004	HS6ST2	up	YES	NO	0.248394	0.0886891	-0.188239	0.2001
362.173	-0.847049	0.138226	-6.12799	8.89983e-10	2.95441e-08	ENSG00000053770.12_AP5M1	ENSG00000053770	AP5M1	down	YES	NO	-0.515584	0.000176619	0.516467	0.000171386
315.516	-2.53124	0.413118	-6.12715	8.94672e-10	2.96379e-08	ENSG00000135549.15_PKIB	ENSG00000135549	PKIB	down	YES	NO	-0.430459	0.00225852	0.549163	5.29936e-05
1185.16	-0.74277	0.121345	-6.12112	9.29218e-10	3.07183e-08	ENSG00000134287.10_ARF3	ENSG00000134287	ARF3	down	YES	NO	-0.340047	0.0180417	0.476719	0.000613684
1234.41	0.664312	0.108558	6.11944	9.3906e-10	3.09792e-08	ENSG00000155506.18_LARP1	ENSG00000155506	LARP1	up	YES	NO	0.313643	0.029946	-0.391956	0.00586627
26.323	-1.95305	0.319433	-6.11413	9.7088e-10	3.19627e-08	ENSG00000175600.16_SUGCT	ENSG00000175600	SUGCT	down	YES	NO	-0.464943	0.000870101	0.473815	0.00066964
44.2958	1.94273	0.317797	6.11311	9.77055e-10	3.20333e-08	ENSG00000135744.9_AGT	ENSG00000135744	AGT	up	YES	NO	0.183769	0.211187	-0.42681	0.00248425
80.8772	-1.67133	0.273396	-6.11321	9.76452e-10	3.20333e-08	ENSG00000275718.2_CCL15	ENSG00000275718	CCL15	down	YES	NO	-0.380937	0.00755854	0.498247	0.000313546
89.2404	-2.48062	0.406168	-6.10738	1.01281e-09	3.30691e-08	ENSG00000168079.17_SCARA5	ENSG00000168079	SCARA5	down	YES	NO	-0.312463	0.0306027	0.456331	0.00111453
310.989	-1.68809	0.276388	-6.10769	1.01081e-09	3.30691e-08	ENSG00000174640.15_SLCO2A1	ENSG00000174640	SLCO2A1	down	YES	NO	-0.279249	0.0545899	0.465326	0.000860454
889.24	0.804613	0.131789	6.10533	1.02591e-09	3.34282e-08	ENSG00000147140.17_NONO	ENSG00000147140	NONO	up	YES	NO	0.328254	0.0227394	-0.361039	0.0116993
2568.78	-1.45254	0.237977	-6.1037	1.0364e-09	3.36322e-08	ENSG00000110090.13_CPT1A	ENSG00000110090	CPT1A	down	YES	NO	-0.391027	0.00599494	0.482333	0.000517285
209.259	-2.04794	0.335519	-6.10381	1.03568e-09	3.36322e-08	ENSG00000156298.13_TSPAN7	ENSG00000156298	TSPAN7	down	YES	NO	-0.403446	0.0044631	0.54748	5.6463e-05
58.0074	2.28982	0.375221	6.10261	1.0435e-09	3.37938e-08	ENSG00000060656.20_PTPRU	ENSG00000060656	PTPRU	up	YES	NO	0.242308	0.0970474	-0.381754	0.0074199
345.023	-1.75204	0.287301	-6.09828	1.07217e-09	3.46516e-08	ENSG00000262655.4_SPON1	ENSG00000262655	SPON1	down	YES	NO	-0.378923	0.0079096	0.377072	0.00824494
1050.47	-1.211	0.198648	-6.0962	1.08622e-09	3.50344e-08	ENSG00000123159.16_GIPC1	ENSG00000123159	GIPC1	down	YES	NO	-0.282625	0.0516126	0.365817	0.0105594
2828.54	-1.54949	0.254326	-6.09254	1.11135e-09	3.57724e-08	ENSG00000184012.14_TMPRSS2	ENSG00000184012	TMPRSS2	down	YES	NO	-0.406486	0.00414505	0.446132	0.00148207
215.053	4.07405	0.669089	6.08896	1.13648e-09	3.64339e-08	ENSG00000125538.12_IL1B	ENSG00000125538	IL1B	up	YES	NO	0.469615	0.000758688	-0.307958	0.0332208
203.538	1.60706	0.26392	6.0892	1.13477e-09	3.64339e-08	ENSG00000129667.13_RHBDF2	ENSG00000129667	RHBDF2	up	YES	NO	0.453415	0.00121025	-0.4161	0.00326625
40.4409	2.76273	0.454189	6.08277	1.18122e-09	3.7716e-08	ENSG00000018280.17_SLC11A1	ENSG00000018280	SLC11A1	up	YES	NO	0.187706	0.201398	-0.371279	0.00937446
978.877	-0.956439	0.157234	-6.0829	1.18031e-09	3.7716e-08	ENSG00000135932.11_CAB39	ENSG00000135932	CAB39	down	YES	NO	-0.475822	0.000630502	0.391042	0.00599286
13.177	-2.74339	0.451033	-6.08245	1.18363e-09	3.77172e-08	ENSG00000163106.11_HPGDS	ENSG00000163106	HPGDS	down	YES	NO	-0.26048	0.0737604	0.513736	0.000188041
1963.14	-1.36626	0.224642	-6.08195	1.18729e-09	3.77581e-08	ENSG00000088256.9_GNA11	ENSG00000088256	GNA11	down	YES	NO	-0.379961	0.0077269	0.46029	0.000995443
423.682	-0.908841	0.14955	-6.07717	1.22322e-09	3.87458e-08	ENSG00000148158.17_SNX30	ENSG00000148158	SNX30	down	YES	NO	-0.454497	0.00117392	0.412927	0.00353616
117.73	-1.78594	0.293875	-6.07723	1.22279e-09	3.87458e-08	ENSG00000179750.16_APOBEC3B	ENSG00000179750	APOBEC3B	down	YES	YES	-0.372717	0.00908228	0.381096	0.00753129
443.989	1.23459	0.203179	6.07637	1.22936e-09	3.8863e-08	ENSG00000108773.11_KAT2A	ENSG00000108773	KAT2A	up	YES	YES	0.371681	0.00929191	-0.406142	0.00418004
206.819	-1.12182	0.18463	-6.07604	1.23186e-09	3.88647e-08	ENSG00000104756.16_KCTD9	ENSG00000104756	KCTD9	down	YES	NO	-0.36635	0.0104384	0.504178	0.000258535
26.9781	-1.62451	0.267402	-6.07516	1.23861e-09	3.90001e-08	ENSG00000275688.4_CCL15-CCL14	ENSG00000275688	CCL15-CCL14	down	YES	NO	-0.438816	0.0018086	0.495054	0.000347367
710.718	-0.733153	0.120709	-6.07371	1.24987e-09	3.92725e-08	ENSG00000072518.22_MARK2	ENSG00000072518	MARK2	down	YES	NO	-0.414119	0.00343253	0.456007	0.00112483
804.308	-0.633175	0.104254	-6.07341	1.2522e-09	3.92725e-08	ENSG00000100280.17_AP1B1	ENSG00000100280	AP1B1	down	YES	NO	-0.355317	0.0132017	0.438152	0.00184118
141.84	0.580242	0.0955677	6.07153	1.26697e-09	3.95865e-08	ENSG00000070770.10_CSNK2A2	ENSG00000070770	CSNK2A2	up	YES	NO	0.31184	0.0309538	-0.448626	0.0013834
113.973	0.916604	0.150968	6.0715	1.26719e-09	3.95865e-08	ENSG00000162065.14_TBC1D24	ENSG00000162065	TBC1D24	up	YES	NO	0.216318	0.139746	-0.364953	0.0107582
129.139	1.12444	0.18528	6.0689	1.28787e-09	4.01538e-08	ENSG00000064545.15_TMEM161A	ENSG00000064545	TMEM161A	up	YES	NO	0.166452	0.25817	-0.438242	0.00183673
195.921	-0.783766	0.129184	-6.06707	1.30264e-09	4.05348e-08	ENSG00000213619.11_NDUFS3	ENSG00000213619	NDUFS3	down	YES	NO	-0.471254	0.000722738	0.467985	0.000796019
171.031	-1.45862	0.240548	-6.06375	1.32987e-09	4.13013e-08	ENSG00000186594.14_MIR22HG	ENSG00000186594	MIR22HG	down	YES	NO	-0.330937	0.0215892	0.471277	0.000722247
35.2482	2.0451	0.3373	6.06314	1.33493e-09	4.13777e-08	ENSG00000179862.7_CITED4	ENSG00000179862	CITED4	up	YES	NO	0.215989	0.140365	-0.393621	0.00564169
383.983	2.05915	0.339693	6.06178	1.34624e-09	4.1647e-08	ENSG00000075275.18_CELSR1	ENSG00000075275	CELSR1	up	YES	NO	0.315985	0.0286769	-0.45852	0.00104721
481.458	1.60622	0.26499	6.06145	1.34898e-09	4.16508e-08	ENSG00000130635.16_COL5A1	ENSG00000130635	COL5A1	up	YES	NO	0.184824	0.208531	-0.371818	0.009264
38.6287	2.65362	0.437854	6.0605	1.35695e-09	4.18156e-08	ENSG00000135960.10_EDAR	ENSG00000135960	EDAR	up	YES	NO	0.325954	0.0237665	-0.319871	0.0266707
1046.18	-1.08901	0.179801	-6.05677	1.38885e-09	4.27159e-08	ENSG00000116016.14_EPAS1	ENSG00000116016	EPAS1	down	YES	NO	-0.365182	0.0107051	0.553302	4.52756e-05
123.577	-1.20848	0.199744	-6.05015	1.44713e-09	4.44226e-08	ENSG00000189077.11_TMEM120A	ENSG00000189077	TMEM120A	down	YES	NO	-0.346073	0.0159772	0.399528	0.0049043
245.757	1.92703	0.318568	6.04904	1.45709e-09	4.46419e-08	ENSG00000158106.14_RHPN1	ENSG00000158106	RHPN1	up	YES	NO	0.381442	0.0074726	-0.420271	0.00293913
625.138	-0.648697	0.107282	-6.04665	1.47892e-09	4.52237e-08	ENSG00000075151.23_EIF4G3	ENSG00000075151	EIF4G3	down	YES	NO	-0.322417	0.0254212	0.530465	0.000105226
24.4977	1.8465	0.305446	6.04526	1.49173e-09	4.55277e-08	ENSG00000003249.15_DBNDD1	ENSG00000003249	DBNDD1	up	YES	NO	0.157827	0.284006	-0.32238	0.025439
42.1377	2.43476	0.402954	6.04228	1.51956e-09	4.62883e-08	ENSG00000163032.12_VSNL1	ENSG00000163032	VSNL1	up	YES	NO	0.264082	0.0697188	-0.299578	0.0385837
232.69	-1.48578	0.245946	-6.04108	1.5309e-09	4.65445e-08	ENSG00000104154.7_SLC30A4	ENSG00000104154	SLC30A4	down	YES	NO	-0.388558	0.0063489	0.475586	0.00063499
12.5425	-2.67693	0.443188	-6.04017	1.53954e-09	4.67178e-08	ENSG00000030304.14_MUSK	ENSG00000030304	MUSK	down	YES	NO	-0.274989	0.058543	0.434637	0.0020225
369.731	-1.40976	0.23346	-6.03854	1.55511e-09	4.71006e-08	ENSG00000077463.15_SIRT6	ENSG00000077463	SIRT6	down	YES	YES	-0.290352	0.0452902	0.417215	0.00317578
33.7159	1.91598	0.317444	6.03564	1.58332e-09	4.78638e-08	ENSG00000188343.13_CIBAR1	ENSG00000188343	CIBAR1	up	YES	NO	0.361752	0.0115228	-0.361056	0.011695
1092.38	-1.87669	0.311055	-6.03329	1.6065e-09	4.84725e-08	ENSG00000183778.18_B3GALT5	ENSG00000183778	B3GALT5	down	YES	NO	-0.30534	0.0348251	0.405827	0.0042122
3102.27	-2.20695	0.366035	-6.02934	1.64635e-09	4.94934e-08	ENSG00000079385.23_CEACAM1	ENSG00000079385	CEACAM1	down	YES	NO	-0.327775	0.0229502	0.486334	0.000457146
262.429	-2.0335	0.337269	-6.02931	1.64656e-09	4.94934e-08	ENSG00000271447.6_MMP28	ENSG00000271447	MMP28	down	YES	NO	-0.393877	0.0056079	0.415939	0.00327951
460.195	-1.29401	0.214649	-6.0285	1.65485e-09	4.95889e-08	ENSG00000125648.15_SLC25A23	ENSG00000125648	SLC25A23	down	YES	NO	-0.344887	0.0163668	0.462215	0.000941756
210.32	-0.976462	0.161977	-6.02839	1.65598e-09	4.95889e-08	ENSG00000250479.9_CHCHD10	ENSG00000250479	CHCHD10	down	YES	NO	-0.476527	0.000617253	0.470392	0.000741455
118.085	-1.00852	0.167376	-6.02548	1.68608e-09	5.03955e-08	ENSG00000197798.9_FAM118B	ENSG00000197798	FAM118B	down	YES	NO	-0.421706	0.00283343	0.46434	0.000885505
344.374	-1.64846	0.273607	-6.02494	1.69175e-09	5.04699e-08	ENSG00000166311.10_SMPD1	ENSG00000166311	SMPD1	down	YES	NO	-0.342039	0.0173356	0.453593	0.00120421
100.118	1.2335	0.204931	6.01909	1.75402e-09	5.22297e-08	ENSG00000156697.13_UTP14A	ENSG00000156697	UTP14A	up	YES	NO	0.3764	0.00836949	-0.316004	0.0286672
92.2471	1.01598	0.168809	6.01851	1.76027e-09	5.23179e-08	ENSG00000174996.12_KLC2	ENSG00000174996	KLC2	up	YES	NO	0.342079	0.0173217	-0.390347	0.0060907
82.5593	0.997227	0.165717	6.01764	1.76982e-09	5.25037e-08	ENSG00000136144.12_RCBTB1	ENSG00000136144	RCBTB1	up	YES	NO	0.277675	0.0560247	-0.323499	0.0249049
488.037	-2.33093	0.387381	-6.01715	1.77518e-09	5.25646e-08	ENSG00000184434.8_LRRC19	ENSG00000184434	LRRC19	down	YES	NO	-0.337118	0.019124	0.510328	0.000210874
29.8997	1.35001	0.224598	6.0108	1.84605e-09	5.45613e-08	ENSG00000187024.15_PTRH1	ENSG00000187024	PTRH1	up	YES	NO	0.22525	0.123732	-0.346825	0.0157344
368.397	-0.942759	0.156874	-6.00965	1.85929e-09	5.48509e-08	ENSG00000167977.9_KCTD5	ENSG00000167977	KCTD5	down	YES	NO	-0.410473	0.00375814	0.417142	0.00318167
356.246	0.931726	0.155064	6.00865	1.87073e-09	5.50861e-08	ENSG00000133612.19_AGAP3	ENSG00000133612	AGAP3	up	YES	NO	0.342021	0.0173419	-0.460868	0.000979036
493.997	-1.37315	0.228541	-6.00833	1.87445e-09	5.50935e-08	ENSG00000176597.12_B3GNT5	ENSG00000176597	B3GNT5	down	YES	NO	-0.341137	0.0176522	0.487894	0.000435458
621.002	-0.968306	0.161298	-6.0032	1.93462e-09	5.67571e-08	ENSG00000116171.19_SCP2	ENSG00000116171	SCP2	down	YES	NO	-0.400886	0.00474728	0.520112	0.000151251
398.981	1.18922	0.198162	6.00123	1.95833e-09	5.73469e-08	ENSG00000153944.12_MSI2	ENSG00000153944	MSI2	up	YES	NO	0.334432	0.0201643	-0.413595	0.00347778
169.173	1.25718	0.2095	6.00086	1.96272e-09	5.737e-08	ENSG00000068366.21_ACSL4	ENSG00000068366	ACSL4	up	YES	NO	0.20771	0.156592	-0.353874	0.0136057
45.4673	1.45926	0.243202	6.00019	1.9709e-09	5.75034e-08	ENSG00000168785.8_TSPAN5	ENSG00000168785	TSPAN5	up	YES	NO	0.231414	0.113515	-0.508209	0.000226308
205.358	1.04905	0.174848	5.99978	1.97583e-09	5.75417e-08	ENSG00000171163.16_ZNF692	ENSG00000171163	ZNF692	up	YES	NO	0.448806	0.00137651	-0.525433	0.000125706
811.117	1.36667	0.227914	5.99644	2.01691e-09	5.86304e-08	ENSG00000183779.7_ZNF703	ENSG00000183779	ZNF703	up	YES	NO	0.284661	0.0498806	-0.332712	0.0208551
270.111	1.81263	0.302347	5.99519	2.03244e-09	5.89741e-08	ENSG00000172164.15_SNTB1	ENSG00000172164	SNTB1	up	YES	NO	0.406792	0.00411414	-0.382135	0.00735599
742.687	1.00222	0.1673	5.99057	2.0911e-09	6.05657e-08	ENSG00000184216.14_IRAK1	ENSG00000184216	IRAK1	up	YES	NO	0.255147	0.080082	-0.457073	0.00109128
342.168	0.899212	0.150128	5.98965	2.10292e-09	6.07974e-08	ENSG00000148843.15_PDCD11	ENSG00000148843	PDCD11	up	YES	NO	0.361728	0.0115286	-0.354608	0.013399
1460.55	1.11001	0.185337	5.98917	2.1092e-09	6.08682e-08	ENSG00000196187.12_TMEM63A	ENSG00000196187	TMEM63A	up	YES	NO	0.360316	0.0118806	-0.470765	0.000733305
19.0069	-1.8736	0.312871	-5.9884	2.11919e-09	6.10458e-08	ENSG00000234724.1_HDAC1P1	ENSG00000234724	HDAC1P1	down	YES	NO	-0.275513	0.0580447	0.435634	0.00196956
247.737	1.15622	0.193242	5.98326	2.18714e-09	6.28892e-08	ENSG00000134815.19_DHX34	ENSG00000134815	DHX34	up	YES	NO	0.463707	0.000901937	-0.428481	0.00237853
44.7475	-2.15172	0.359821	-5.97998	2.23164e-09	6.40529e-08	ENSG00000118308.15_IRAG2	ENSG00000118308	IRAG2	down	YES	NO	-0.247865	0.0893924	0.399797	0.00487282
72.5055	1.28407	0.214763	5.97903	2.24475e-09	6.43131e-08	ENSG00000133065.11_SLC41A1	ENSG00000133065	SLC41A1	up	YES	NO	0.424092	0.00266516	-0.407856	0.00400836
25.5935	-2.05802	0.34425	-5.97828	2.25503e-09	6.44914e-08	ENSG00000237070.1_AC005550.3	ENSG00000237070	AC005550	down	YES	NO	-0.382999	0.00721291	0.400873	0.0047487
1912.07	-1.48537	0.248482	-5.97777	2.26218e-09	6.45798e-08	ENSG00000161533.12_ACOX1	ENSG00000161533	ACOX1	down	YES	NO	-0.365483	0.0106359	0.445583	0.00150463
36.7034	1.36265	0.228215	5.97091	2.35932e-09	6.72321e-08	ENSG00000172731.15_LRRC20	ENSG00000172731	LRRC20	up	YES	NO	0.336366	0.0194106	-0.277574	0.0561181
1833.67	-1.43685	0.240787	-5.96731	2.41192e-09	6.86081e-08	ENSG00000187446.12_CHP1	ENSG00000187446	CHP1	down	YES	NO	-0.342978	0.0170108	0.498845	0.000307558
1508.28	-2.19385	0.367722	-5.96605	2.4307e-09	6.90188e-08	ENSG00000118515.12_SGK1	ENSG00000118515	SGK1	down	YES	NO	-0.369712	0.00970201	0.462132	0.00094402
223.167	1.25472	0.210364	5.9645	2.45379e-09	6.95502e-08	ENSG00000070882.13_OSBPL3	ENSG00000070882	OSBPL3	up	YES	NO	0.420773	0.00290176	-0.41987	0.00296927
392.878	-1.12595	0.188865	-5.96167	2.49666e-09	7.0556e-08	ENSG00000060971.19_ACAA1	ENSG00000060971	ACAA1	down	YES	NO	-0.277927	0.0557928	0.398122	0.00507178
32.3156	-1.75563	0.29449	-5.96158	2.49815e-09	7.0556e-08	ENSG00000076258.10_FMO4	ENSG00000076258	FMO4	down	YES	NO	-0.395654	0.00537771	0.439399	0.00178044
516.033	-1.50538	0.252555	-5.9606	2.51311e-09	7.07273e-08	ENSG00000179163.12_FUCA1	ENSG00000179163	FUCA1	down	YES	NO	-0.402632	0.00455176	0.456044	0.00112366
523.297	-1.21087	0.203138	-5.96082	2.50979e-09	7.07273e-08	ENSG00000198189.11_HSD17B11	ENSG00000198189	HSD17B11	down	YES	NO	-0.422336	0.00278815	0.463463	0.00090836
160.375	-1.0652	0.178716	-5.96031	2.51765e-09	7.07299e-08	ENSG00000119862.13_LGALSL	ENSG00000119862	LGALSL	down	YES	NO	-0.495917	0.000337913	0.470757	0.000733476
116.088	1.1557	0.194113	5.95376	2.62055e-09	7.3491e-08	ENSG00000108106.14_UBE2S	ENSG00000108106	UBE2S	up	YES	NO	0.334253	0.0202352	-0.451194	0.00128799
57.5873	1.25801	0.211322	5.95303	2.63217e-09	7.36869e-08	ENSG00000149798.5_CDC42EP2	ENSG00000149798	CDC42EP2	up	YES	NO	0.265796	0.0678579	-0.461192	0.000969965
800.493	-1.2401	0.208375	-5.95129	2.66033e-09	7.43444e-08	ENSG00000101782.15_RIOK3	ENSG00000101782	RIOK3	down	YES	NO	-0.240869	0.09911	0.429188	0.00233501
76.7894	-2.20273	0.370478	-5.94565	2.7537e-09	7.68186e-08	ENSG00000168229.4_PTGDR	ENSG00000168229	PTGDR	down	YES	NO	-0.347099	0.0156467	0.369384	0.00977193
60.6745	0.858036	0.144359	5.94377	2.78537e-09	7.75659e-08	ENSG00000180884.10_ZNF792	ENSG00000180884	ZNF792	up	YES	NO	0.307023	0.0337865	-0.325279	0.0240749
33.9622	1.58393	0.26654	5.94257	2.80591e-09	7.80014e-08	ENSG00000253438.4_PCAT1	ENSG00000253438	PCAT1	up	YES	NO	0.410601	0.00374632	-0.349958	0.0147557
1006.4	1.05788	0.178037	5.94189	2.81763e-09	7.81904e-08	ENSG00000106263.18_EIF3B	ENSG00000106263	EIF3B	up	YES	NO	0.197545	0.178347	-0.440825	0.0017131
322.753	-1.86532	0.31427	-5.93539	2.93151e-09	8.10677e-08	ENSG00000137819.14_PAQR5	ENSG00000137819	PAQR5	down	YES	NO	-0.375994	0.00844572	0.473883	0.00066827
45.2794	2.43389	0.410057	5.93548	2.92983e-09	8.10677e-08	ENSG00000262188.2_LINC01978	ENSG00000262188	LINC01978	up	YES	NO	0.121824	0.409456	-0.352874	0.0138919
134.205	-1.5907	0.268096	-5.93334	2.96835e-09	8.1944e-08	ENSG00000118804.9_STBD1	ENSG00000118804	STBD1	down	YES	NO	-0.320138	0.0265375	0.444016	0.00157063
1152.53	-1.38127	0.232834	-5.93242	2.98498e-09	8.22604e-08	ENSG00000150593.18_PDCD4	ENSG00000150593	PDCD4	down	YES	NO	-0.383767	0.00708773	0.465307	0.000860929
378.6	-0.965591	0.162801	-5.93113	3.00858e-09	8.27671e-08	ENSG00000083937.10_CHMP2B	ENSG00000083937	CHMP2B	down	YES	NO	-0.39752	0.00514497	0.444756	0.00153915
255.119	1.48963	0.251184	5.93043	3.02148e-09	8.29785e-08	ENSG00000196756.13_SNHG17	ENSG00000196756	SNHG17	up	YES	NO	0.328094	0.0228099	-0.358057	0.012463
116.985	-2.49387	0.420578	-5.92963	3.03611e-09	8.32366e-08	ENSG00000197165.11_SULT1A2	ENSG00000197165	SULT1A2	down	YES	NO	-0.322186	0.0255324	0.491195	0.000392606
1806.75	-0.684296	0.11545	-5.92719	3.08163e-09	8.4339e-08	ENSG00000072778.20_ACADVL	ENSG00000072778	ACADVL	down	YES	NO	-0.322153	0.0255481	0.404524	0.00434796
48.617	0.877856	0.148128	5.92632	3.09793e-09	8.46396e-08	ENSG00000184162.15_NR2C2AP	ENSG00000184162	NR2C2AP	up	YES	NO	0.0989699	0.503333	-0.44598	0.00148827
418.116	-0.843651	0.142415	-5.92391	3.14374e-09	8.57438e-08	ENSG00000129493.15_HEATR5A	ENSG00000129493	HEATR5A	down	YES	NO	-0.437611	0.00186811	0.514767	0.000181589
2068.09	-1.51161	0.255241	-5.92229	3.17482e-09	8.6443e-08	ENSG00000134755.18_DSC2	ENSG00000134755	DSC2	down	YES	NO	-0.350846	0.0144878	0.502295	0.000274974
1328.47	0.857216	0.1448	5.92	3.21949e-09	8.75096e-08	ENSG00000117335.20_CD46	ENSG00000117335	CD46	up	YES	NO	0.266553	0.0670494	-0.347045	0.0156639
45.046	2.56862	0.433984	5.9187	3.24506e-09	8.80008e-08	ENSG00000104899.8_AMH	ENSG00000104899	AMH	up	YES	NO	0.397752	0.00511664	-0.304506	0.0353497
52.287	-2.33998	0.395366	-5.91851	3.24863e-09	8.80008e-08	ENSG00000167779.9_IGFBP6	ENSG00000167779	IGFBP6	down	YES	NO	-0.329042	0.0223963	0.281867	0.0522695
539.691	4.7819	0.808551	5.91416	3.33583e-09	9.02091e-08	ENSG00000169429.11_CXCL8	ENSG00000169429	CXCL8	up	YES	NO	0.422659	0.00276514	-0.476576	0.000616339
97.8002	1.34933	0.228337	5.9094	3.43352e-09	9.26497e-08	ENSG00000103202.13_NME4	ENSG00000103202	NME4	up	YES	NO	0.295924	0.0411349	-0.363205	0.01117
2063.72	-1.81195	0.306633	-5.9092	3.43773e-09	9.26497e-08	ENSG00000143167.12_GPA33	ENSG00000143167	GPA33	down	YES	NO	-0.462721	0.000928087	0.488812	0.000423143
873.415	-1.75585	0.297194	-5.9081	3.46072e-09	9.31116e-08	ENSG00000040199.18_PHLPP2	ENSG00000040199	PHLPP2	down	YES	NO	-0.342721	0.0170994	0.470929	0.000729744
256.267	-1.10949	0.187816	-5.90734	3.47671e-09	9.32835e-08	ENSG00000157184.7_CPT2	ENSG00000157184	CPT2	down	YES	NO	-0.432524	0.00213902	0.444719	0.00154071
40.9609	1.12979	0.191255	5.90724	3.47884e-09	9.32835e-08	ENSG00000185838.14_GNB1L	ENSG00000185838	GNB1L	up	YES	NO	0.399546	0.00490222	-0.507638	0.000230645
427.374	-0.942277	0.159541	-5.90619	3.50119e-09	9.37247e-08	ENSG00000160445.11_ZER1	ENSG00000160445	ZER1	down	YES	NO	-0.290757	0.0449771	0.424707	0.00262327
219.296	0.850062	0.143935	5.90586	3.50818e-09	9.37539e-08	ENSG00000025293.17_PHF20	ENSG00000025293	PHF20	up	YES	YES	0.303824	0.0357835	-0.380087	0.00770498
1060.06	-3.34744	0.567053	-5.90322	3.56477e-09	9.51064e-08	ENSG00000204936.10_CD177	ENSG00000204936	CD177	down	YES	NO	-0.249185	0.0876448	0.309274	0.0324374
55.5909	0.834441	0.141412	5.90077	3.61804e-09	9.59718e-08	ENSG00000088356.6_PDRG1	ENSG00000088356	PDRG1	up	YES	NO	0.158625	0.281546	-0.430598	0.00225028
455.979	-1.46685	0.24857	-5.90115	3.60972e-09	9.59718e-08	ENSG00000114859.16_CLCN2	ENSG00000114859	CLCN2	down	YES	NO	-0.341139	0.0176517	0.416799	0.0032093
62.83	1.35022	0.228804	5.9012	3.60864e-09	9.59718e-08	ENSG00000132003.9_ZSWIM4	ENSG00000132003	ZSWIM4	up	YES	NO	0.368999	0.00985429	-0.512568	0.000195595
806.415	-0.769798	0.13046	-5.90062	3.62135e-09	9.59718e-08	ENSG00000163110.15_PDLIM5	ENSG00000163110	PDLIM5	down	YES	NO	-0.316105	0.0286131	0.536435	8.49035e-05
397.384	-0.985312	0.167005	-5.8999	3.63731e-09	9.62345e-08	ENSG00000155744.10_FAM126B	ENSG00000155744	FAM126B	down	YES	NO	-0.234735	0.108285	0.37882	0.00792794
207.596	-1.45043	0.245948	-5.89728	3.69537e-09	9.76082e-08	ENSG00000135124.15_P2RX4	ENSG00000135124	P2RX4	down	YES	NO	-0.308851	0.0326874	0.413384	0.00349614
55.9827	1.33853	0.227118	5.89354	3.78001e-09	9.96781e-08	ENSG00000100350.15_FOXRED2	ENSG00000100350	FOXRED2	up	YES	NO	0.296053	0.0410423	-0.367423	0.0101984
1257.89	-0.975492	0.165561	-5.89204	3.81455e-09	1.00422e-07	ENSG00000170248.15_PDCD6IP	ENSG00000170248	PDCD6IP	down	YES	NO	-0.374211	0.00878712	0.453391	0.00121108
129.067	0.782745	0.132858	5.8916	3.82473e-09	1.00524e-07	ENSG00000003393.16_ALS2	ENSG00000003393	ALS2	up	YES	NO	0.345183	0.0162688	-0.50493	0.000252231
25.3104	1.54607	0.262467	5.89053	3.84957e-09	1.0101e-07	ENSG00000185761.11_ADAMTSL5	ENSG00000185761	ADAMTSL5	up	YES	NO	0.416847	0.0032054	-0.30543	0.0347692
149.804	1.25703	0.213469	5.88859	3.89493e-09	1.02032e-07	ENSG00000087077.14_TRIP6	ENSG00000087077	TRIP6	up	YES	NO	0.149955	0.30901	-0.218387	0.135905
909.007	-1.49143	0.253385	-5.88603	3.95585e-09	1.03457e-07	ENSG00000096060.15_FKBP5	ENSG00000096060	FKBP5	down	YES	NO	-0.400766	0.00476101	0.340304	0.0179491
56.5589	1.32096	0.224597	5.88145	4.0669e-09	1.06187e-07	ENSG00000101190.13_TCFL5	ENSG00000101190	TCFL5	up	YES	NO	0.302685	0.0365175	-0.411555	0.00365886
448.014	-0.646035	0.109878	-5.87955	4.11391e-09	1.07107e-07	ENSG00000100897.18_DCAF11	ENSG00000100897	DCAF11	down	YES	NO	-0.422872	0.00275008	0.452928	0.00122691
106.672	0.718668	0.122233	5.87948	4.11562e-09	1.07107e-07	ENSG00000131043.13_AAR2	ENSG00000131043	AAR2	up	YES	NO	0.237115	0.104651	-0.276125	0.0574671
60.9037	3.77554	0.642269	5.87844	4.14142e-09	1.07602e-07	ENSG00000108244.17_KRT23	ENSG00000108244	KRT23	up	YES	NO	0.143344	0.331064	-0.42404	0.00266873
147.582	-1.56306	0.266006	-5.87602	4.20236e-09	1.09008e-07	ENSG00000154822.18_PLCL2	ENSG00000154822	PLCL2	down	YES	NO	-0.339686	0.018172	0.493896	0.000360421
210.632	0.65581	0.11162	5.87538	4.21864e-09	1.09252e-07	ENSG00000070061.16_ELP1	ENSG00000070061	ELP1	up	YES	YES	0.288727	0.0465644	-0.317112	0.0280826
182.889	0.874181	0.148825	5.87388	4.25705e-09	1.09888e-07	ENSG00000160208.13_RRP1B	ENSG00000160208	RRP1B	up	YES	NO	0.331352	0.0214155	-0.369703	0.0097039
322.945	1.38467	0.235726	5.87407	4.25236e-09	1.09888e-07	ENSG00000261236.8_BOP1	ENSG00000261236	BOP1	up	YES	NO	0.29133	0.0445373	-0.378578	0.00797123
278.286	1.00718	0.171481	5.87342	4.26885e-09	1.10015e-07	ENSG00000061273.18_HDAC7	ENSG00000061273	HDAC7	up	YES	YES	0.392529	0.00578806	-0.461658	0.000957009
654.006	-0.734369	0.125075	-5.87143	4.32056e-09	1.1115e-07	ENSG00000145349.18_CAMK2D	ENSG00000145349	CAMK2D	down	YES	NO	-0.330565	0.0217455	0.452252	0.00125041
55.5987	3.52177	0.59984	5.87119	4.3269e-09	1.1115e-07	ENSG00000214049.8_UCA1	ENSG00000214049	UCA1	up	YES	NO	0.207255	0.157521	-0.424719	0.00262244
64.1315	-1.09233	0.186101	-5.86957	4.36935e-09	1.11803e-07	ENSG00000101844.18_ATG4A	ENSG00000101844	ATG4A	down	YES	NO	-0.315889	0.0287283	0.496355	0.000333205
2487.39	-0.942671	0.160602	-5.86959	4.36867e-09	1.11803e-07	ENSG00000162909.18_CAPN2	ENSG00000162909	CAPN2	down	YES	NO	-0.36902	0.00984985	0.403889	0.00441541
85.8748	-2.4448	0.416532	-5.86941	4.37339e-09	1.11803e-07	ENSG00000170382.12_LRRN2	ENSG00000170382	LRRN2	down	YES	NO	-0.334913	0.0199745	0.392626	0.00577492
281.767	0.660222	0.112511	5.86809	4.40836e-09	1.12516e-07	ENSG00000213024.12_NUP62	ENSG00000213024	NUP62	up	YES	NO	0.432116	0.00216216	-0.434694	0.00201947
395.95	1.15804	0.197406	5.8663	4.45632e-09	1.13558e-07	ENSG00000172216.6_CEBPB	ENSG00000172216	CEBPB	up	YES	NO	0.348263	0.0152784	-0.51525	0.000178633
275.856	-1.13156	0.19292	-5.86544	4.47947e-09	1.13793e-07	ENSG00000133731.10_IMPA1	ENSG00000133731	IMPA1	down	YES	NO	-0.323943	0.0246958	0.506618	0.000238566
1642.8	0.57193	0.0975131	5.86516	4.48704e-09	1.13793e-07	ENSG00000153187.20_HNRNPU	ENSG00000153187	HNRNPU	up	YES	NO	0.385312	0.00684172	-0.337896	0.0188313
92.964	1.9285	0.328797	5.86532	4.4826e-09	1.13793e-07	ENSG00000203499.12_IQANK1	ENSG00000203499	IQANK1	up	YES	NO	0.327375	0.0231273	-0.471275	0.000722303
13.9639	-2.31278	0.394491	-5.8627	4.55398e-09	1.15307e-07	ENSG00000162391.12_FAM151A	ENSG00000162391	FAM151A	down	YES	NO	-0.228552	0.118175	0.332444	0.0209648
303.052	-0.515254	0.0879139	-5.86089	4.60384e-09	1.1621e-07	ENSG00000114745.14_GORASP1	ENSG00000114745	GORASP1	down	YES	NO	-0.343746	0.0167494	0.414272	0.00341945
25.3141	2.17108	0.370436	5.86088	4.60426e-09	1.1621e-07	ENSG00000272168.8_CASC15	ENSG00000272168	CASC15	up	YES	NO	0.374342	0.00876166	-0.30625	0.0342603
26.36	1.50655	0.257092	5.85996	4.62968e-09	1.16667e-07	ENSG00000088305.18_DNMT3B	ENSG00000088305	DNMT3B	up	YES	YES	0.290162	0.0454375	-0.392501	0.00579195
77.4704	-2.84857	0.486327	-5.85732	4.70396e-09	1.18351e-07	ENSG00000039987.7_BEST2	ENSG00000039987	BEST2	down	YES	NO	-0.300175	0.0381791	0.275069	0.0584666
284.026	0.980247	0.167366	5.85689	4.71603e-09	1.18467e-07	ENSG00000013573.17_DDX11	ENSG00000013573	DDX11	up	YES	NO	0.474348	0.000659036	-0.448196	0.0014
277.556	-1.04702	0.178904	-5.8524	4.84525e-09	1.21521e-07	ENSG00000224051.7_CPTP	ENSG00000224051	CPTP	down	YES	NO	-0.362007	0.0114601	0.390537	0.00606376
541.937	-2.32001	0.396444	-5.85204	4.85569e-09	1.21591e-07	ENSG00000148483.9_TMEM236	ENSG00000148483	TMEM236	down	YES	NO	-0.347654	0.0154702	0.51499	0.000180217
14.2473	-2.11005	0.360731	-5.84938	4.93398e-09	1.23357e-07	ENSG00000189129.14_PLAC9	ENSG00000189129	PLAC9	down	YES	NO	-0.317893	0.0276768	0.417578	0.00314684
54.7282	0.9239	0.158048	5.8457	5.04437e-09	1.25919e-07	ENSG00000185252.19_ZNF74	ENSG00000185252	ZNF74	up	YES	NO	0.315685	0.0288371	-0.403964	0.00440742
1902.86	-1.23334	0.211021	-5.84462	5.07729e-09	1.26542e-07	ENSG00000081923.15_ATP8B1	ENSG00000081923	ATP8B1	down	YES	NO	-0.44571	0.00149937	0.518457	0.000160111
5858	-1.83411	0.313917	-5.84264	5.13789e-09	1.27852e-07	ENSG00000171747.9_LGALS4	ENSG00000171747	LGALS4	down	YES	NO	-0.373738	0.00887967	0.527215	0.00011807
137.75	2.87739	0.492504	5.84237	5.14629e-09	1.27861e-07	ENSG00000136383.7_ALPK3	ENSG00000136383	ALPK3	up	YES	NO	0.321523	0.0258539	-0.261093	0.07306
67.8575	1.48079	0.253626	5.83848	5.26806e-09	1.30682e-07	ENSG00000146858.8_ZC3HAV1L	ENSG00000146858	ZC3HAV1L	up	YES	NO	0.285279	0.0493653	-0.465977	0.000844252
1023.14	-1.74515	0.298952	-5.83757	5.29681e-09	1.31191e-07	ENSG00000189221.10_MAOA	ENSG00000189221	MAOA	down	YES	NO	-0.378536	0.00797878	0.53394	9.29155e-05
18.0108	1.56135	0.267511	5.83658	5.32835e-09	1.31767e-07	ENSG00000165886.5_UBTD1	ENSG00000165886	UBTD1	up	YES	NO	0.288466	0.0467716	-0.459325	0.00102338
87.621	2.36295	0.405018	5.83418	5.40561e-09	1.3347e-07	ENSG00000254166.3_CASC19	ENSG00000254166	CASC19	up	YES	NO	0.277745	0.0559599	-0.349988	0.0147465
259.337	1.03145	0.176803	5.83392	5.41412e-09	1.33473e-07	ENSG00000116337.20_AMPD2	ENSG00000116337	AMPD2	up	YES	NO	0.408693	0.00392678	-0.382566	0.00728436
213.064	1.09134	0.187104	5.83281	5.45015e-09	1.34079e-07	ENSG00000101158.15_NELFCD	ENSG00000101158	NELFCD	up	YES	NO	0.231699	0.113059	-0.301869	0.0370514
60.7461	1.04992	0.180008	5.83264	5.45558e-09	1.34079e-07	ENSG00000280195.1_XX-FW83563B9.5	ENSG00000280195	XX-FW83563B9	up	YES	NO	0.241417	0.0983215	-0.409534	0.00384632
15.6223	1.46622	0.251437	5.83135	5.49812e-09	1.34916e-07	ENSG00000171097.14_KYAT1	ENSG00000171097	KYAT1	up	YES	NO	0.325319	0.0240566	-0.330825	0.0216361
742.708	0.71182	0.122117	5.82901	5.57583e-09	1.36612e-07	ENSG00000263001.7_GTF2I	ENSG00000263001	GTF2I	up	YES	YES	0.216443	0.139511	-0.406519	0.00414169
221.906	1.34644	0.231033	5.8279	5.61304e-09	1.37312e-07	ENSG00000203880.12_PCMTD2	ENSG00000203880	PCMTD2	up	YES	NO	0.208273	0.155447	-0.298061	0.0396265
166.088	-1.09039	0.187194	-5.82494	5.71322e-09	1.39548e-07	ENSG00000167578.18_RAB4B	ENSG00000167578	RAB4B	down	YES	NO	-0.365393	0.0106565	0.359746	0.0120252
185.192	0.792848	0.136139	5.8238	5.75247e-09	1.40292e-07	ENSG00000148356.15_LRSAM1	ENSG00000148356	LRSAM1	up	YES	NO	0.334433	0.0201641	-0.441006	0.00170476
92.8278	1.21233	0.208196	5.82303	5.77887e-09	1.4072e-07	ENSG00000099889.14_ARVCF	ENSG00000099889	ARVCF	up	YES	NO	0.221533	0.130219	-0.333893	0.0203789
193.558	1.52857	0.262681	5.81911	5.9161e-09	1.43841e-07	ENSG00000102024.18_PLS3	ENSG00000102024	PLS3	up	YES	NO	0.282975	0.0513115	-0.271953	0.0614987
1272.79	0.864219	0.148532	5.81842	5.94075e-09	1.4422e-07	ENSG00000115053.17_NCL	ENSG00000115053	NCL	up	YES	YES	0.285985	0.0487803	-0.420934	0.00288989
420.019	-1.15993	0.199364	-5.81816	5.95005e-09	1.44225e-07	ENSG00000142867.14_BCL10	ENSG00000142867	BCL10	down	YES	NO	-0.283732	0.0506654	0.475308	0.000640321
554.089	-2.48729	0.427661	-5.81603	6.02613e-09	1.45847e-07	ENSG00000119121.22_TRPM6	ENSG00000119121	TRPM6	down	YES	NO	-0.348126	0.0153213	0.373574	0.0089119
541.776	-0.608764	0.104697	-5.81451	6.08112e-09	1.46954e-07	ENSG00000114331.15_ACAP2	ENSG00000114331	ACAP2	down	YES	NO	-0.441893	0.00166419	0.45467	0.0011682
418.63	-0.588714	0.101261	-5.81383	6.10598e-09	1.47331e-07	ENSG00000134444.15_RELCH	ENSG00000134444	RELCH	down	YES	NO	-0.210998	0.14999	0.283153	0.0511589
108.368	0.8786	0.151256	5.80868	6.29673e-09	1.51704e-07	ENSG00000104884.17_ERCC2	ENSG00000104884	ERCC2	up	YES	NO	0.33235	0.0210031	-0.40054	0.00478689
93.2149	1.5638	0.269235	5.80831	6.31051e-09	1.51805e-07	ENSG00000075702.19_WDR62	ENSG00000075702	WDR62	up	YES	NO	0.357768	0.0125392	-0.338142	0.0187396
32.5234	2.52541	0.434926	5.80654	6.37775e-09	1.53012e-07	ENSG00000023839.12_ABCC2	ENSG00000023839	ABCC2	up	YES	NO	0.248294	0.0888215	-0.429529	0.00231425
18.6985	1.10141	0.189686	5.80648	6.3799e-09	1.53012e-07	ENSG00000143498.18_TAF1A	ENSG00000143498	TAF1A	up	YES	NO	0.257145	0.0776661	-0.444016	0.00157064
266.112	0.816521	0.140754	5.80106	6.58979e-09	1.57808e-07	ENSG00000011275.19_RNF216	ENSG00000011275	RNF216	up	YES	NO	0.33773	0.0188935	-0.421209	0.00286965
308.288	2.4466	0.42181	5.80024	6.62212e-09	1.58106e-07	ENSG00000130513.6_GDF15	ENSG00000130513	GDF15	up	YES	NO	0.361093	0.0116859	-0.306378	0.0341817
109.676	0.94431	0.162868	5.79802	6.71009e-09	1.59966e-07	ENSG00000165915.14_SLC39A13	ENSG00000165915	SLC39A13	up	YES	NO	0.128776	0.383041	-0.443181	0.00160688
7019.14	-1.08207	0.186656	-5.79716	6.74473e-09	1.60342e-07	ENSG00000136068.16_FLNB	ENSG00000136068	FLNB	down	YES	NO	-0.422938	0.00274543	0.41001	0.00380144
12.4356	-1.5022	0.259129	-5.79713	6.74602e-09	1.60342e-07	ENSG00000203497.2_PDCD4-AS1	ENSG00000203497	PDCD4-AS1	down	YES	NO	-0.266368	0.0672461	0.396243	0.0053033
134.773	0.93039	0.160503	5.79673	6.7621e-09	1.60484e-07	ENSG00000125630.16_POLR1B	ENSG00000125630	POLR1B	up	YES	NO	0.241615	0.0980367	-0.39359	0.00564584
178.488	-1.28497	0.221711	-5.79569	6.80412e-09	1.6124e-07	ENSG00000127995.17_CASD1	ENSG00000127995	CASD1	down	YES	NO	-0.344137	0.0166174	0.492422	0.000377671
233.997	0.961237	0.166095	5.78727	7.15412e-09	1.69282e-07	ENSG00000179456.10_ZBTB18	ENSG00000179456	ZBTB18	up	YES	NO	0.285553	0.0491378	-0.460338	0.000994077
264.655	0.805998	0.139279	5.78695	7.1678e-09	1.69354e-07	ENSG00000100364.19_KIAA0930	ENSG00000100364	KIAA0930	up	YES	NO	0.35897	0.0122248	-0.328649	0.0225669
240.692	-2.05773	0.355616	-5.78637	7.19231e-09	1.69681e-07	ENSG00000135702.15_CHST5	ENSG00000135702	CHST5	down	YES	NO	-0.360144	0.011924	0.370329	0.00957188
163.385	1.28464	0.222034	5.78579	7.21714e-09	1.69767e-07	ENSG00000183579.16_ZNRF3	ENSG00000183579	ZNRF3	up	YES	NO	0.309209	0.0324757	-0.313612	0.029963
237.134	-2.17706	0.376277	-5.78579	7.21733e-09	1.69767e-07	ENSG00000260092.1_RP11-77K12.7	ENSG00000260092	RP11-77K12	down	YES	NO	-0.396489	0.00527247	0.365521	0.0106271
47.959	1.62068	0.280153	5.785	7.25128e-09	1.70314e-07	ENSG00000136378.15_ADAMTS7	ENSG00000136378	ADAMTS7	up	YES	NO	0.28748	0.0475622	-0.34605	0.0159846
121.127	0.901431	0.155888	5.78256	7.35723e-09	1.72548e-07	ENSG00000082516.9_GEMIN5	ENSG00000082516	GEMIN5	up	YES	NO	0.293296	0.0430539	-0.369851	0.00967253
214.272	1.75746	0.304003	5.78107	7.42283e-09	1.73169e-07	ENSG00000101057.16_MYBL2	ENSG00000101057	MYBL2	up	YES	NO	0.246651	0.0910235	-0.377988	0.00807748
457.129	-0.663281	0.114726	-5.78144	7.40632e-09	1.73169e-07	ENSG00000157916.20_RER1	ENSG00000157916	RER1	down	YES	NO	-0.387183	0.00655381	0.512099	0.000198709
808.158	2.02413	0.3501	5.78158	7.40038e-09	1.73169e-07	ENSG00000168646.13_AXIN2	ENSG00000168646	AXIN2	up	YES	NO	0.319251	0.0269827	-0.389578	0.00620044
111.463	1.04906	0.181468	5.78097	7.4273e-09	1.73169e-07	ENSG00000249115.9_HAUS5	ENSG00000249115	HAUS5	up	YES	NO	0.432142	0.00216068	-0.42287	0.00275021
172.074	0.968224	0.167519	5.77978	7.47969e-09	1.74135e-07	ENSG00000130511.16_SSBP4	ENSG00000130511	SSBP4	up	YES	NO	0.284892	0.0496874	-0.372036	0.00921974
1410.49	-0.850638	0.147205	-5.77858	7.53322e-09	1.75125e-07	ENSG00000162522.11_KIAA1522	ENSG00000162522	KIAA1522	down	YES	NO	-0.392444	0.0057997	0.45838	0.00105138
494.834	-1.71574	0.29693	-5.77826	7.5475e-09	1.75201e-07	ENSG00000152952.12_PLOD2	ENSG00000152952	PLOD2	down	YES	NO	-0.278902	0.0549036	0.449656	0.00134442
148.827	1.44395	0.250103	5.77341	7.76808e-09	1.80059e-07	ENSG00000124067.17_SLC12A4	ENSG00000124067	SLC12A4	up	YES	NO	0.31143	0.031187	-0.355361	0.0131895
53.0116	-1.16687	0.202129	-5.77292	7.79099e-09	1.80327e-07	ENSG00000001460.18_STPG1	ENSG00000001460	STPG1	down	YES	NO	-0.27558	0.0579817	0.516648	0.000170334
1308.3	-1.40056	0.242625	-5.77253	7.80904e-09	1.80482e-07	ENSG00000168016.15_TRANK1	ENSG00000168016	TRANK1	down	YES	NO	-0.294892	0.0418799	0.373359	0.00895448
451.782	0.837946	0.145215	5.77039	7.90887e-09	1.82524e-07	ENSG00000068654.17_POLR1A	ENSG00000068654	POLR1A	up	YES	NO	0.249873	0.086745	-0.38383	0.00707757
353.933	-1.09023	0.188975	-5.76917	7.96629e-09	1.83583e-07	ENSG00000143198.13_MGST3	ENSG00000143198	MGST3	down	YES	NO	-0.468859	0.000775792	0.562475	3.17016e-05
14.8477	-2.33454	0.404767	-5.76762	8.0399e-09	1.85011e-07	ENSG00000166473.17_PKD1L2	ENSG00000166473	PKD1L2	down	YES	NO	-0.248347	0.0887504	0.485182	0.000473777
176.309	-1.11376	0.193194	-5.765	8.16576e-09	1.87365e-07	ENSG00000171621.14_SPSB1	ENSG00000171621	SPSB1	down	YES	NO	-0.42387	0.00268041	0.315818	0.0287661
66.9162	1.42318	0.24689	5.76442	8.19368e-09	1.87734e-07	ENSG00000134070.5_IRAK2	ENSG00000134070	IRAK2	up	YES	NO	0.460412	0.000991965	-0.51364	0.000188648
1061.16	-0.848158	0.147243	-5.76025	8.39878e-09	1.92157e-07	ENSG00000133816.18_MICAL2	ENSG00000133816	MICAL2	down	YES	NO	-0.518513	0.000159804	0.393312	0.00568285
201.561	1.13298	0.196765	5.75803	8.50999e-09	1.94421e-07	ENSG00000111641.12_NOP2	ENSG00000111641	NOP2	up	YES	NO	0.394561	0.00551824	-0.369805	0.00968239
93.7195	1.04812	0.182069	5.75673	8.57611e-09	1.95651e-07	ENSG00000130684.14_ZNF337	ENSG00000130684	ZNF337	up	YES	NO	0.138876	0.346513	-0.492516	0.000376553
983.072	-0.920314	0.159911	-5.75516	8.65618e-09	1.97195e-07	ENSG00000084754.12_HADHA	ENSG00000084754	HADHA	down	YES	NO	-0.423626	0.00269733	0.584629	1.28139e-05
90.1265	1.77229	0.30805	5.75327	8.75314e-09	1.99118e-07	ENSG00000104290.11_FZD3	ENSG00000104290	FZD3	up	YES	NO	0.204059	0.16417	-0.259332	0.075087
242.278	-0.856236	0.148871	-5.75153	8.84402e-09	2.00898e-07	ENSG00000138641.18_HERC3	ENSG00000138641	HERC3	down	YES	NO	-0.317441	0.0279113	0.45455	0.00117214
77.161	1.11113	0.193208	5.75096	8.87364e-09	2.01283e-07	ENSG00000117385.16_P3H1	ENSG00000117385	P3H1	up	YES	NO	0.289241	0.0461585	-0.366584	0.0103855
92.3526	-1.31065	0.227948	-5.74977	8.93665e-09	2.02424e-07	ENSG00000166821.9_PEX11A	ENSG00000166821	PEX11A	down	YES	NO	-0.48692	0.000448887	0.465009	0.00086845
9.66044	-2.01669	0.350853	-5.74798	9.0316e-09	2.04284e-07	ENSG00000281100.1_RP11-640L9.2	ENSG00000281100	RP11-640L9	down	YES	NO	-0.290009	0.045557	0.520619	0.000148631
33.2183	1.89093	0.329213	5.7438	9.25743e-09	2.09094e-07	ENSG00000254726.3_MEX3A	ENSG00000254726	MEX3A	up	YES	NO	0.344544	0.016481	-0.272422	0.061034
15.09	1.81167	0.315532	5.74166	9.37543e-09	2.11459e-07	ENSG00000134317.18_GRHL1	ENSG00000134317	GRHL1	up	YES	NO	0.452618	0.00123764	-0.477416	0.000600897
126.706	1.29649	0.22583	5.74101	9.41119e-09	2.11965e-07	ENSG00000171793.16_CTPS1	ENSG00000171793	CTPS1	up	YES	NO	0.231626	0.113176	-0.347896	0.0153936
237.174	-1.28483	0.223903	-5.73833	9.56173e-09	2.15051e-07	ENSG00000170522.10_ELOVL6	ENSG00000170522	ELOVL6	down	YES	NO	-0.300541	0.0379331	0.486426	0.000455845
104.618	-2.21617	0.386225	-5.73804	9.57774e-09	2.15107e-07	ENSG00000225731.1_PDE9A-AS1	ENSG00000225731	PDE9A-AS1	down	YES	NO	-0.319749	0.0267319	0.484297	0.000486918
37.6834	1.20783	0.210522	5.73731	9.61913e-09	2.15125e-07	ENSG00000116670.15_MAD2L2	ENSG00000116670	MAD2L2	up	YES	NO	0.449205	0.00136138	-0.294347	0.0422776
1082.54	-1.40831	0.245454	-5.73758	9.60391e-09	2.15125e-07	ENSG00000128311.14_TST	ENSG00000128311	TST	down	YES	NO	-0.388505	0.00635667	0.42017	0.00294671
48.0986	1.6679	0.290707	5.7374	9.61393e-09	2.15125e-07	ENSG00000225614.4_ZNF469	ENSG00000225614	ZNF469	up	YES	NO	0.280995	0.0530333	-0.39285	0.00574469
506.813	-0.774045	0.134936	-5.73638	9.67193e-09	2.16002e-07	ENSG00000176871.9_WSB2	ENSG00000176871	WSB2	down	YES	YES	-0.370614	0.0095123	0.432612	0.00213406
1047.14	-0.925639	0.161407	-5.73482	9.76138e-09	2.17694e-07	ENSG00000127334.11_DYRK2	ENSG00000127334	DYRK2	down	YES	NO	-0.213479	0.145146	0.448896	0.00137311
69.9341	1.09435	0.190862	5.73373	9.82473e-09	2.188e-07	ENSG00000186767.7_SPIN4	ENSG00000186767	SPIN4	up	YES	NO	0.160972	0.274395	-0.383617	0.00711215
798.535	-1.04601	0.182536	-5.73044	1.00169e-08	2.22768e-07	ENSG00000049759.20_NEDD4L	ENSG00000049759	NEDD4L	down	YES	NO	-0.321946	0.0256485	0.29021	0.0454007
115.917	0.724062	0.126369	5.72973	1.0059e-08	2.23392e-07	ENSG00000136875.13_PRPF4	ENSG00000136875	PRPF4	up	YES	NO	0.273492	0.0599862	-0.359922	0.0119805
1288.05	-1.17464	0.205096	-5.72729	1.02048e-08	2.26313e-07	ENSG00000168924.15_LETM1	ENSG00000168924	LETM1	down	YES	NO	-0.342037	0.0173365	0.376859	0.00828426
252.582	-0.741059	0.129449	-5.72473	1.036e-08	2.29435e-07	ENSG00000157538.14_VPS26C	ENSG00000157538	VPS26C	down	YES	NO	-0.330781	0.0216546	0.405202	0.00427687
541.984	-1.51011	0.263879	-5.72276	1.0481e-08	2.31791e-07	ENSG00000122971.9_ACADS	ENSG00000122971	ACADS	down	YES	NO	-0.343353	0.0168828	0.442525	0.00163584
99.433	1.65299	0.288865	5.72237	1.05047e-08	2.31993e-07	ENSG00000133019.12_CHRM3	ENSG00000133019	CHRM3	up	YES	NO	0.138588	0.347525	-0.189143	0.197907
485.336	-1.21939	0.21313	-5.72134	1.05687e-08	2.33082e-07	ENSG00000100744.15_GSKIP	ENSG00000100744	GSKIP	down	YES	NO	-0.4696	0.000759014	0.421369	0.00285796
525.206	1.23374	0.215756	5.71821	1.07651e-08	2.37085e-07	ENSG00000101444.13_AHCY	ENSG00000101444	AHCY	up	YES	NO	0.250554	0.0858602	-0.323893	0.0247193
419.996	0.95824	0.167636	5.71619	1.08939e-08	2.3959e-07	ENSG00000124177.16_CHD6	ENSG00000124177	CHD6	up	YES	YES	0.304116	0.0355973	-0.327449	0.0230944
152.85	-1.23271	0.215714	-5.71454	1.10003e-08	2.41595e-07	ENSG00000176894.10_PXMP2	ENSG00000176894	PXMP2	down	YES	NO	-0.380929	0.00755974	0.428753	0.00236173
304.851	-0.884439	0.154807	-5.71318	1.10886e-08	2.42864e-07	ENSG00000108788.12_MLX	ENSG00000108788	MLX	down	YES	NO	-0.304173	0.0355608	0.487456	0.000441447
754.86	-0.914888	0.160133	-5.71331	1.10797e-08	2.42864e-07	ENSG00000135956.9_TMEM127	ENSG00000135956	TMEM127	down	YES	NO	-0.390061	0.00613128	0.452653	0.00123644
31.958	1.26285	0.22117	5.70984	1.13084e-08	2.47338e-07	ENSG00000126249.8_PDCD2L	ENSG00000126249	PDCD2L	up	YES	NO	0.25017	0.0863581	-0.454336	0.00117925
268.535	-1.6598	0.290773	-5.70824	1.14149e-08	2.49326e-07	ENSG00000067113.17_PLPP1	ENSG00000067113	PLPP1	down	YES	NO	-0.39272	0.00576225	0.487914	0.000435185
121.497	1.03834	0.181923	5.70757	1.14603e-08	2.49973e-07	ENSG00000107819.13_SFXN3	ENSG00000107819	SFXN3	up	YES	NO	0.380106	0.00770165	-0.30167	0.0371821
143.684	-0.97472	0.170801	-5.70674	1.15161e-08	2.50502e-07	ENSG00000008382.16_MPND	ENSG00000008382	MPND	down	YES	NO	-0.248849	0.0880867	0.370032	0.00963429
1237.71	-2.98051	0.52227	-5.70684	1.15094e-08	2.50502e-07	ENSG00000197273.4_GUCA2A	ENSG00000197273	GUCA2A	down	YES	NO	-0.391518	0.00592664	0.530154	0.0001064
826.486	0.668244	0.117129	5.70519	1.16215e-08	2.52451e-07	ENSG00000172534.14_HCFC1	ENSG00000172534	HCFC1	up	YES	YES	0.236793	0.105138	-0.373953	0.00883752
50.7432	1.27621	0.223756	5.70358	1.17318e-08	2.54499e-07	ENSG00000130590.14_SAMD10	ENSG00000130590	SAMD10	up	YES	NO	0.226224	0.122072	-0.469266	0.000766539
258.366	0.905546	0.15878	5.70314	1.17621e-08	2.54808e-07	ENSG00000070814.22_TCOF1	ENSG00000070814	TCOF1	up	YES	NO	0.354124	0.0135351	-0.379988	0.00772227
3728.98	-0.651406	0.114243	-5.70191	1.1847e-08	2.56299e-07	ENSG00000198561.16_CTNND1	ENSG00000198561	CTNND1	down	YES	NO	-0.428633	0.00236911	0.415983	0.00327585
91.4825	0.792157	0.138963	5.70047	1.19476e-08	2.58124e-07	ENSG00000068438.15_FTSJ1	ENSG00000068438	FTSJ1	up	YES	NO	0.34364	0.0167851	-0.346276	0.0159112
32.5918	1.88481	0.330715	5.69919	1.20379e-08	2.59369e-07	ENSG00000141527.18_CARD14	ENSG00000141527	CARD14	up	YES	NO	0.378235	0.00803283	-0.449851	0.00133714
291.808	-1.05905	0.185818	-5.69936	1.20256e-08	2.59369e-07	ENSG00000165895.19_ARHGAP42	ENSG00000165895	ARHGAP42	down	YES	NO	-0.271693	0.0617568	0.412366	0.00358585
2194.65	-1.4034	0.246262	-5.69883	1.20633e-08	2.59565e-07	ENSG00000131981.16_LGALS3	ENSG00000131981	LGALS3	down	YES	NO	-0.410301	0.00377416	0.455771	0.00113238
53.8633	-1.40485	0.246551	-5.69802	1.21208e-08	2.6045e-07	ENSG00000124772.12_CPNE5	ENSG00000124772	CPNE5	down	YES	NO	-0.343109	0.0169661	0.43287	0.00211951
510.984	-0.966042	0.169548	-5.69776	1.21391e-08	2.60491e-07	ENSG00000139132.16_FGD4	ENSG00000139132	FGD4	down	YES	NO	-0.314363	0.0295507	0.445207	0.00152021
414.927	-3.00252	0.527045	-5.6969	1.22008e-08	2.61462e-07	ENSG00000174992.8_ZG16	ENSG00000174992	ZG16	down	YES	NO	-0.352002	0.0141455	0.389235	0.00625009
100.631	1.26907	0.222783	5.69642	1.2235e-08	2.61843e-07	ENSG00000119771.15_KLHL29	ENSG00000119771	KLHL29	up	YES	NO	0.350599	0.014562	-0.441575	0.00167864
25.8659	2.7139	0.476492	5.69557	1.22959e-08	2.62792e-07	ENSG00000164398.15_ACSL6	ENSG00000164398	ACSL6	up	YES	NO	0.226601	0.121435	-0.285035	0.0495682
304.011	1.36612	0.239939	5.6936	1.24388e-08	2.65489e-07	ENSG00000049449.10_RCN1	ENSG00000049449	RCN1	up	YES	NO	0.261248	0.0728835	-0.369309	0.00978782
41.8485	-1.30116	0.228624	-5.69126	1.26104e-08	2.68791e-07	ENSG00000135407.10_AVIL	ENSG00000135407	AVIL	down	YES	NO	-0.268097	0.0654229	0.407904	0.00400364
133.359	1.27868	0.224698	5.69064	1.26566e-08	2.69415e-07	ENSG00000119403.15_PHF19	ENSG00000119403	PHF19	up	YES	YES	0.225583	0.123162	-0.311485	0.0311561
268.541	0.812598	0.142857	5.6882	1.28386e-08	2.72922e-07	ENSG00000149658.18_YTHDF1	ENSG00000149658	YTHDF1	up	YES	NO	0.299512	0.0386283	-0.383581	0.00711792
160.961	-1.81923	0.320268	-5.68035	1.34422e-08	2.85373e-07	ENSG00000263429.3_TMEM238L	ENSG00000263429	TMEM238L	down	YES	NO	-0.341471	0.0175344	0.462678	0.000929238
102.789	1.35205	0.238043	5.67985	1.34811e-08	2.85817e-07	ENSG00000101220.18_C20orf27	ENSG00000101220	C20orf27	up	YES	NO	0.234005	0.109418	-0.307092	0.0337447
180.684	1.9308	0.340033	5.67827	1.36066e-08	2.88095e-07	ENSG00000112655.16_PTK7	ENSG00000112655	PTK7	up	YES	NO	0.279823	0.054074	-0.237849	0.10355
166.448	1.91492	0.337337	5.67658	1.37411e-08	2.90554e-07	ENSG00000075618.18_FSCN1	ENSG00000075618	FSCN1	up	YES	NO	0.344047	0.0166477	-0.241232	0.098587
303.692	1.01676	0.179151	5.67545	1.38326e-08	2.91992e-07	ENSG00000148840.11_PPRC1	ENSG00000148840	PPRC1	up	YES	NO	0.450676	0.00130674	-0.379856	0.00774533
87.9526	0.921986	0.162456	5.67528	1.38458e-08	2.91992e-07	ENSG00000173272.16_MZT2A	ENSG00000173272	MZT2A	up	YES	NO	0.176122	0.231138	-0.323715	0.0248029
308.336	-3.92004	0.691181	-5.6715	1.41549e-08	2.98114e-07	ENSG00000183034.13_OTOP2	ENSG00000183034	OTOP2	down	YES	NO	-0.385634	0.00679141	0.511462	0.000203013
211.845	-2.18209	0.385111	-5.66613	1.46058e-08	3.07204e-07	ENSG00000124205.18_EDN3	ENSG00000124205	EDN3	down	YES	NO	-0.387005	0.00658066	0.4815	0.000530667
93.7599	-1.46391	0.258387	-5.66556	1.46547e-08	3.07825e-07	ENSG00000060140.9_STYK1	ENSG00000060140	STYK1	down	YES	NO	-0.321042	0.0260895	0.483158	0.000504326
206.723	0.658496	0.116257	5.66416	1.4775e-08	3.09943e-07	ENSG00000100099.21_HPS4	ENSG00000100099	HPS4	up	YES	NO	0.380842	0.00757479	-0.399719	0.00488194
27.8853	1.46304	0.258333	5.6634	1.48401e-08	3.10899e-07	ENSG00000265817.4_FSBP	ENSG00000265817	FSBP	up	YES	NO	0.276625	0.0569989	-0.442327	0.00164467
12264.2	-2.55878	0.451944	-5.66171	1.49875e-08	3.1275e-07	ENSG00000155850.8_SLC26A2	ENSG00000155850	SLC26A2	down	YES	NO	-0.365506	0.0106304	0.486893	0.000449271
450.856	-2.4548	0.433579	-5.66171	1.49869e-08	3.1275e-07	ENSG00000168447.11_SCNN1B	ENSG00000168447	SCNN1B	down	YES	NO	-0.337649	0.018924	0.452118	0.0012551
36.907	-2.17849	0.38475	-5.66209	1.4954e-08	3.1275e-07	ENSG00000188828.13_GLRA4	ENSG00000188828	GLRA4	down	YES	NO	-0.3283	0.0227194	0.405208	0.00427625
318.946	-0.665343	0.117547	-5.66025	1.51152e-08	3.15002e-07	ENSG00000122390.19_NAA60	ENSG00000122390	NAA60	down	YES	YES	-0.308405	0.0329529	0.350556	0.0145749
1464.22	-1.50062	0.265182	-5.65882	1.52415e-08	3.17219e-07	ENSG00000059728.11_MXD1	ENSG00000059728	MXD1	down	YES	NO	-0.284623	0.0499128	0.385049	0.00688314
617.199	1.16295	0.20558	5.65691	1.5412e-08	3.20348e-07	ENSG00000230590.11_FTX	ENSG00000230590	FTX	up	YES	NO	0.322245	0.025504	-0.328454	0.0226519
732.573	-1.19751	0.211702	-5.65658	1.54423e-08	3.20558e-07	ENSG00000081026.19_MAGI3	ENSG00000081026	MAGI3	down	YES	NO	-0.311093	0.03138	0.377278	0.00820689
11.4367	1.97765	0.349644	5.65619	1.5477e-08	3.20826e-07	ENSG00000168263.9_KCNV2	ENSG00000168263	KCNV2	up	YES	NO	0.133359	0.366191	-0.31932	0.0269478
443.307	1.35633	0.239805	5.65598	1.54956e-08	3.20826e-07	ENSG00000182240.16_BACE2	ENSG00000182240	BACE2	up	YES	NO	0.36629	0.0104518	-0.440643	0.0017216
199.867	-0.949535	0.167898	-5.65542	1.55463e-08	3.21459e-07	ENSG00000115963.14_RND3	ENSG00000115963	RND3	down	YES	NO	-0.364915	0.010767	0.406907	0.00410263
4887	-1.63591	0.289287	-5.65498	1.55866e-08	3.21874e-07	ENSG00000135916.16_ITM2C	ENSG00000135916	ITM2C	down	YES	NO	-0.391157	0.00597672	0.431276	0.00221057
57.1572	1.41076	0.249484	5.65473	1.56093e-08	3.21923e-07	ENSG00000177788.6_RP5-1061H20.4	ENSG00000177788	RP5-1061H20	up	YES	NO	0.214599	0.142997	-0.376877	0.0082808
442.465	-1.13667	0.201087	-5.65263	1.58015e-08	3.25466e-07	ENSG00000069956.13_MAPK6	ENSG00000069956	MAPK6	down	YES	NO	-0.32446	0.0244537	0.426067	0.0025326
27.1421	1.95571	0.346017	5.65206	1.58532e-08	3.26108e-07	ENSG00000073464.13_CLCN4	ENSG00000073464	CLCN4	up	YES	NO	0.296103	0.0410068	-0.248202	0.0889433
27.7556	-1.96399	0.347504	-5.65169	1.58877e-08	3.26396e-07	ENSG00000144619.15_CNTN4	ENSG00000144619	CNTN4	down	YES	NO	-0.451567	0.00127464	0.552258	4.71184e-05
20.8665	1.20113	0.212561	5.65077	1.5973e-08	3.27724e-07	ENSG00000198298.13_ZNF485	ENSG00000198298	ZNF485	up	YES	NO	0.0858258	0.561903	-0.390173	0.00611538
56.7292	-1.77089	0.313447	-5.64974	1.60695e-08	3.29279e-07	ENSG00000232070.9_TMEM253	ENSG00000232070	TMEM253	down	YES	NO	-0.417185	0.00317821	0.451087	0.00129183
119.963	0.864754	0.15313	5.6472	1.63084e-08	3.33746e-07	ENSG00000117597.18_UTP25	ENSG00000117597	UTP25	up	YES	NO	0.252648	0.0831873	-0.374177	0.00879371
75.2173	1.25435	0.222134	5.64679	1.6347e-08	3.34104e-07	ENSG00000111490.15_TBC1D30	ENSG00000111490	TBC1D30	up	YES	NO	0.231354	0.113612	-0.372901	0.00904548
383.98	0.770552	0.136582	5.64168	1.68398e-08	3.43735e-07	ENSG00000101150.18_TPD52L2	ENSG00000101150	TPD52L2	up	YES	NO	0.302612	0.0365652	-0.42693	0.00247656
376.958	-0.950396	0.168507	-5.6401	1.6995e-08	3.46458e-07	ENSG00000164142.16_FAM160A1	ENSG00000164142	FAM160A1	down	YES	NO	-0.326018	0.0237373	0.46045	0.000990867
308.347	-0.913692	0.162053	-5.63822	1.71813e-08	3.49807e-07	ENSG00000175309.15_PHYKPL	ENSG00000175309	PHYKPL	down	YES	NO	-0.279998	0.053918	0.446067	0.00148473
983.955	-0.912568	0.161892	-5.63688	1.73157e-08	3.52093e-07	ENSG00000117298.16_ECE1	ENSG00000117298	ECE1	down	YES	NO	-0.375376	0.00856276	0.423943	0.00267543
25.5487	-3.02013	0.535889	-5.63574	1.74312e-08	3.53989e-07	ENSG00000224466.1_CDCA4P2	ENSG00000224466	CDCA4P2	down	YES	NO	-0.229753	0.116202	0.455768	0.00113247
1793.13	-2.14237	0.380205	-5.63478	1.75281e-08	3.5505e-07	ENSG00000117115.13_PADI2	ENSG00000117115	PADI2	down	YES	YES	-0.42342	0.00271164	0.514463	0.000183471
379.003	0.67009	0.118919	5.63485	1.75213e-08	3.5505e-07	ENSG00000136699.20_SMPD4	ENSG00000136699	SMPD4	up	YES	NO	0.290438	0.0452234	-0.431084	0.00222171
44.0142	-0.738172	0.131081	-5.63141	1.78738e-08	3.61592e-07	ENSG00000125434.11_SLC25A35	ENSG00000125434	SLC25A35	down	YES	NO	-0.311812	0.03097	0.516397	0.000171796
331.119	-1.70496	0.302788	-5.63086	1.79312e-08	3.62293e-07	ENSG00000152078.10_TLCD4	ENSG00000152078	TLCD4	down	YES	NO	-0.490284	0.000404037	0.476402	0.000619577
597.989	-0.848539	0.150701	-5.63062	1.79567e-08	3.62348e-07	ENSG00000080815.19_PSEN1	ENSG00000080815	PSEN1	down	YES	NO	-0.409573	0.00384264	0.502042	0.000277256
260.192	0.658269	0.116928	5.62969	1.80531e-08	3.63831e-07	ENSG00000163872.16_YEATS2	ENSG00000163872	YEATS2	up	YES	YES	0.391301	0.00595675	-0.404862	0.00431241
40.9941	1.89638	0.33695	5.62808	1.82225e-08	3.66779e-07	ENSG00000143507.18_DUSP10	ENSG00000143507	DUSP10	up	YES	NO	0.421975	0.00281401	-0.325558	0.0239469
98.4787	1.14089	0.202757	5.62688	1.83496e-08	3.6887e-07	ENSG00000116649.10_SRM	ENSG00000116649	SRM	up	YES	NO	0.371745	0.00927894	-0.315476	0.0289489
418.262	-0.68554	0.121841	-5.62651	1.83894e-08	3.69205e-07	ENSG00000170185.11_USP38	ENSG00000170185	USP38	down	YES	NO	-0.431449	0.00220048	0.380786	0.00758439
804.165	-0.873363	0.15525	-5.62552	1.84949e-08	3.70854e-07	ENSG00000101160.15_CTSZ	ENSG00000101160	CTSZ	down	YES	NO	-0.3411	0.0176653	0.398222	0.00505969
564.551	-1.29801	0.230859	-5.62253	1.88182e-08	3.76861e-07	ENSG00000092421.17_SEMA6A	ENSG00000092421	SEMA6A	down	YES	NO	-0.328717	0.0225376	0.501147	0.000285454
394.657	0.966298	0.171909	5.62099	1.89867e-08	3.79757e-07	ENSG00000108557.19_RAI1	ENSG00000108557	RAI1	up	YES	YES	0.43997	0.00175318	-0.438635	0.00181746
367.648	0.601712	0.107056	5.62052	1.90388e-08	3.80322e-07	ENSG00000272391.6_POM121C	ENSG00000272391	POM121C	up	YES	NO	0.240089	0.100242	-0.462912	0.000922958
98.3833	2.94472	0.52411	5.61853	1.92592e-08	3.84241e-07	ENSG00000123689.6_G0S2	ENSG00000123689	G0S2	up	YES	NO	0.275779	0.0577931	-0.161576	0.272574
765.636	-1.4296	0.254502	-5.61725	1.94017e-08	3.86116e-07	ENSG00000163683.12_SMIM14	ENSG00000163683	SMIM14	down	YES	NO	-0.407173	0.00407604	0.456353	0.00111383
80.6842	0.889168	0.158367	5.6146	1.97022e-08	3.91607e-07	ENSG00000111364.16_DDX55	ENSG00000111364	DDX55	up	YES	NO	0.440331	0.00173618	-0.377635	0.0081417
1038.11	-1.47761	0.263401	-5.60972	2.02659e-08	4.02307e-07	ENSG00000170915.9_PAQR8	ENSG00000170915	PAQR8	down	YES	NO	-0.411664	0.00364896	0.424092	0.00266519
137.55	1.29756	0.231374	5.60807	2.04597e-08	4.05649e-07	ENSG00000241343.10_RPL36A	ENSG00000241343	RPL36A	up	YES	NO	0.223069	0.127508	-0.342584	0.0171465
352.578	1.13686	0.202734	5.60765	2.05096e-08	4.06131e-07	ENSG00000119285.11_HEATR1	ENSG00000119285	HEATR1	up	YES	NO	0.303411	0.0360484	-0.332702	0.0208595
1107.61	-1.54468	0.275508	-5.60667	2.06262e-08	4.07932e-07	ENSG00000198682.13_PAPSS2	ENSG00000198682	PAPSS2	down	YES	NO	-0.367085	0.0102733	0.493601	0.000363809
160.469	1.5267	0.272442	5.60377	2.09742e-08	4.143e-07	ENSG00000120341.18_SEC16B	ENSG00000120341	SEC16B	up	YES	NO	0.321961	0.0256413	-0.430782	0.00223946
155.598	1.01048	0.180349	5.6029	2.10791e-08	4.15854e-07	ENSG00000055044.11_NOP58	ENSG00000055044	NOP58	up	YES	NO	0.345163	0.0162754	-0.428198	0.00239614
392.649	-1.33047	0.237516	-5.60161	2.12365e-08	4.1844e-07	ENSG00000203865.11_ATP1A1-AS1	ENSG00000203865	ATP1A1-AS1	down	YES	NO	-0.341173	0.0176397	0.418781	0.00305253
82.236	1.06384	0.189965	5.60019	2.14117e-08	4.20401e-07	ENSG00000068137.15_PLEKHH3	ENSG00000068137	PLEKHH3	up	YES	NO	0.351693	0.0142363	-0.446458	0.00146885
827.117	-1.37662	0.245818	-5.60016	2.14153e-08	4.20401e-07	ENSG00000151715.8_TMEM45B	ENSG00000151715	TMEM45B	down	YES	NO	-0.467079	0.000817459	0.488947	0.000421355
23.983	1.89252	0.337925	5.60043	2.13821e-08	4.20401e-07	ENSG00000152669.9_CCNO	ENSG00000152669	CCNO	up	YES	NO	0.288975	0.0463682	-0.244297	0.0942519
32.8945	-1.22053	0.217995	-5.59892	2.15688e-08	4.22892e-07	ENSG00000153790.12_C7orf31	ENSG00000153790	C7orf31	down	YES	NO	-0.276181	0.0574148	0.517819	0.000163649
9.79193	2.41776	0.432213	5.59392	2.21998e-08	4.34727e-07	ENSG00000287656.1_RP11-72O9.5	ENSG00000287656	RP11-72O9	up	YES	NO	0.0972711	0.510723	-0.288944	0.0463925
265.51	-1.25626	0.224587	-5.59364	2.22354e-08	4.3489e-07	ENSG00000136052.10_SLC41A2	ENSG00000136052	SLC41A2	down	YES	NO	-0.360749	0.0117717	0.457332	0.00108329
110.452	0.953209	0.170436	5.59276	2.23482e-08	4.36559e-07	ENSG00000113552.16_GNPDA1	ENSG00000113552	GNPDA1	up	YES	NO	0.260273	0.0739983	-0.349707	0.0148321
118.123	-0.659856	0.118019	-5.59108	2.25663e-08	4.40278e-07	ENSG00000125037.12_EMC3	ENSG00000125037	EMC3	down	YES	NO	-0.295762	0.0412515	0.567867	2.55814e-05
790.11	-1.48685	0.266114	-5.58728	2.3065e-08	4.49144e-07	ENSG00000080031.10_PTPRH	ENSG00000080031	PTPRH	down	YES	NO	-0.355915	0.0130374	0.425934	0.00254135
395.496	-0.972608	0.174078	-5.58719	2.30772e-08	4.49144e-07	ENSG00000107242.20_PIP5K1B	ENSG00000107242	PIP5K1B	down	YES	NO	-0.39545	0.00540376	0.439168	0.00179156
37.8019	0.913029	0.163423	5.5869	2.31158e-08	4.49344e-07	ENSG00000169016.17_E2F6	ENSG00000169016	E2F6	up	YES	YES	0.37485	0.00866336	-0.442398	0.0016415
231.965	0.882948	0.158052	5.58644	2.31775e-08	4.49995e-07	ENSG00000106344.8_RBM28	ENSG00000106344	RBM28	up	YES	NO	0.423372	0.002715	-0.366792	0.0103388
2046.25	-0.70394	0.12602	-5.58592	2.3246e-08	4.50175e-07	ENSG00000002834.18_LASP1	ENSG00000002834	LASP1	down	YES	NO	-0.331901	0.021188	0.380448	0.00764255
28.457	1.0362	0.185498	5.58604	2.32306e-08	4.50175e-07	ENSG00000101132.10_PFDN4	ENSG00000101132	PFDN4	up	YES	NO	0.205048	0.16209	-0.331346	0.021418
98.2828	2.46396	0.441116	5.58573	2.32717e-08	4.50175e-07	ENSG00000133067.18_LGR6	ENSG00000133067	LGR6	up	YES	NO	0.147991	0.315462	-0.215836	0.140652
89.3129	0.875205	0.156745	5.58363	2.3555e-08	4.55101e-07	ENSG00000011260.14_UTP18	ENSG00000011260	UTP18	up	YES	NO	0.421543	0.00284526	-0.450386	0.00131735
361.192	-2.16218	0.387559	-5.57896	2.41957e-08	4.66912e-07	ENSG00000146039.11_SLC17A4	ENSG00000146039	SLC17A4	down	YES	NO	-0.296485	0.0407342	0.447431	0.00142995
1128.9	-1.14046	0.204585	-5.57453	2.482e-08	4.78379e-07	ENSG00000131069.20_ACSS2	ENSG00000131069	ACSS2	down	YES	NO	-0.406147	0.00417953	0.481175	0.000535966
212.017	2.35462	0.422477	5.57337	2.49858e-08	4.80991e-07	ENSG00000139292.13_LGR5	ENSG00000139292	LGR5	up	YES	NO	0.271354	0.0620953	-0.169944	0.248174
708.934	1.13048	0.202866	5.57254	2.51049e-08	4.82701e-07	ENSG00000152767.17_FARP1	ENSG00000152767	FARP1	up	YES	NO	0.282899	0.0513766	-0.258918	0.0755696
72.2882	1.39272	0.249947	5.57206	2.51739e-08	4.83443e-07	ENSG00000151746.15_BICD1	ENSG00000151746	BICD1	up	YES	NO	0.472975	0.000686667	-0.340977	0.017709
173.666	0.999111	0.179358	5.5705	2.54008e-08	4.87212e-07	ENSG00000101868.13_POLA1	ENSG00000101868	POLA1	up	YES	NO	0.214856	0.142507	-0.384029	0.00704546
117.679	1.75468	0.315182	5.56721	2.58855e-08	4.95314e-07	ENSG00000087116.16_ADAMTS2	ENSG00000087116	ADAMTS2	up	YES	NO	0.214495	0.143196	-0.378943	0.00790604
170.815	0.840202	0.150915	5.56737	2.58606e-08	4.95314e-07	ENSG00000162885.14_B3GALNT2	ENSG00000162885	B3GALNT2	up	YES	NO	0.250208	0.0863088	-0.456849	0.00109827
332.345	1.02584	0.184325	5.56538	2.6158e-08	4.99925e-07	ENSG00000101294.18_HM13	ENSG00000101294	HM13	up	YES	NO	0.214361	0.143452	-0.288332	0.0468784
272.662	0.647772	0.116429	5.56366	2.6417e-08	5.04082e-07	ENSG00000083520.15_DIS3	ENSG00000083520	DIS3	up	YES	NO	0.235743	0.106734	-0.394602	0.00551289
184.337	0.856622	0.153971	5.56352	2.64389e-08	5.04082e-07	ENSG00000146909.8_NOM1	ENSG00000146909	NOM1	up	YES	NO	0.283554	0.0508168	-0.447087	0.00144358
49.0053	-1.84881	0.332367	-5.56257	2.65837e-08	5.06236e-07	ENSG00000138061.12_CYP1B1	ENSG00000138061	CYP1B1	down	YES	NO	-0.345828	0.0160569	0.328812	0.022496
1004.48	-0.678191	0.121936	-5.56184	2.66944e-08	5.07736e-07	ENSG00000023228.14_NDUFS1	ENSG00000023228	NDUFS1	down	YES	NO	-0.372572	0.00911147	0.460057	0.00100212
76.7264	-2.62282	0.471671	-5.5607	2.68693e-08	5.09844e-07	ENSG00000132915.11_PDE6A	ENSG00000132915	PDE6A	down	YES	NO	-0.313301	0.030135	0.485469	0.00046959
267.105	1.87356	0.336922	5.5608	2.68538e-08	5.09844e-07	ENSG00000162591.16_MEGF6	ENSG00000162591	MEGF6	up	YES	NO	0.117977	0.424513	-0.348529	0.0151955
25.6918	1.58325	0.284777	5.5596	2.70399e-08	5.1247e-07	ENSG00000161647.19_MPP3	ENSG00000161647	MPP3	up	YES	NO	0.420878	0.00289397	-0.385183	0.00686203
216.033	0.664545	0.119578	5.5574	2.7383e-08	5.18354e-07	ENSG00000204713.11_TRIM27	ENSG00000204713	TRIM27	up	YES	YES	0.309212	0.0324738	-0.397134	0.00519241
527.595	-0.940874	0.169314	-5.55696	2.74508e-08	5.18404e-07	ENSG00000085491.17_SLC25A24	ENSG00000085491	SLC25A24	down	YES	NO	-0.414371	0.003411	0.422795	0.00275548
341.867	-2.28629	0.411414	-5.55715	2.74208e-08	5.18404e-07	ENSG00000137634.10_NXPE4	ENSG00000137634	NXPE4	down	YES	NO	-0.369953	0.00965103	0.533998	9.27223e-05
43.192	-2.05302	0.369524	-5.55585	2.76268e-08	5.21107e-07	ENSG00000064655.19_EYA2	ENSG00000064655	EYA2	down	YES	YES	-0.33503	0.0199288	0.572224	2.14514e-05
96.6496	1.38949	0.250117	5.55537	2.77019e-08	5.21906e-07	ENSG00000172965.17_MIR4435-2HG	ENSG00000172965	MIR4435-2HG	up	YES	NO	0.263537	0.0703183	-0.380629	0.00761126
1288.29	-1.44239	0.259789	-5.55216	2.82163e-08	5.30968e-07	ENSG00000112782.19_CLIC5	ENSG00000112782	CLIC5	down	YES	NO	-0.282737	0.0515156	0.399392	0.00492027
156.189	-1.61288	0.290507	-5.55194	2.82513e-08	5.30998e-07	ENSG00000119686.10_FLVCR2	ENSG00000119686	FLVCR2	down	YES	NO	-0.391477	0.00593237	0.449603	0.00134641
142.91	0.900754	0.162248	5.55173	2.82863e-08	5.31028e-07	ENSG00000141569.12_TRIM65	ENSG00000141569	TRIM65	up	YES	NO	0.266408	0.0672042	-0.419363	0.00300777
336.924	1.16744	0.210309	5.55104	2.83982e-08	5.32501e-07	ENSG00000134107.5_BHLHE40	ENSG00000134107	BHLHE40	up	YES	NO	0.4649	0.000871206	-0.31669	0.0283042
67.7771	2.42358	0.436759	5.54899	2.87317e-08	5.38119e-07	ENSG00000101144.13_BMP7	ENSG00000101144	BMP7	up	YES	NO	0.489341	0.000416176	-0.405391	0.00425718
28.2526	1.49787	0.269954	5.5486	2.87965e-08	5.38697e-07	ENSG00000138411.13_HECW2	ENSG00000138411	HECW2	up	YES	NO	0.302298	0.0367696	-0.433064	0.00210869
540.842	0.911568	0.164302	5.54812	2.88762e-08	5.39555e-07	ENSG00000101161.8_PRPF6	ENSG00000101161	PRPF6	up	YES	NO	0.225339	0.12358	-0.441725	0.00167182
191.345	0.854177	0.153968	5.54776	2.8936e-08	5.40036e-07	ENSG00000083444.17_PLOD1	ENSG00000083444	PLOD1	up	YES	NO	0.366128	0.0104886	-0.295439	0.041484
153.536	2.39433	0.431724	5.54598	2.92318e-08	5.44918e-07	ENSG00000140678.17_ITGAX	ENSG00000140678	ITGAX	up	YES	NO	0.289439	0.0460029	-0.336311	0.0194318
148.195	-1.08006	0.194761	-5.54559	2.92963e-08	5.4548e-07	ENSG00000135828.11_RNASEL	ENSG00000135828	RNASEL	down	YES	NO	-0.313244	0.0301666	0.45836	0.00105199
206.354	0.651378	0.117537	5.54191	2.99188e-08	5.5642e-07	ENSG00000058600.16_POLR3E	ENSG00000058600	POLR3E	up	YES	NO	0.468667	0.000780203	-0.333759	0.0204325
423.554	-1.29999	0.234672	-5.53959	3.03178e-08	5.63181e-07	ENSG00000116574.6_RHOU	ENSG00000116574	RHOU	down	YES	NO	-0.380847	0.00757379	0.296373	0.0408143
42.8209	-1.732	0.312727	-5.53837	3.05298e-08	5.66458e-07	ENSG00000187824.9_TMEM220	ENSG00000187824	TMEM220	down	YES	NO	-0.442371	0.00164273	0.45991	0.00100637
304.935	1.16261	0.209971	5.53699	3.07708e-08	5.70265e-07	ENSG00000125772.14_GPCPD1	ENSG00000125772	GPCPD1	up	YES	NO	0.175679	0.232334	-0.355846	0.0130564
93.3292	0.826765	0.149338	5.5362	3.09113e-08	5.72201e-07	ENSG00000090097.22_PCBP4	ENSG00000090097	PCBP4	up	YES	NO	0.477029	0.000607973	-0.305682	0.0346121
100.464	1.22788	0.221906	5.53337	3.14141e-08	5.80832e-07	ENSG00000025772.8_TOMM34	ENSG00000025772	TOMM34	up	YES	NO	0.23991	0.100503	-0.353478	0.0137185
222.945	0.98121	0.177391	5.53133	3.17804e-08	5.86922e-07	ENSG00000185920.17_PTCH1	ENSG00000185920	PTCH1	up	YES	NO	0.297358	0.0401175	-0.37626	0.00839566
179.041	-0.725309	0.131154	-5.53023	3.19811e-08	5.89943e-07	ENSG00000158793.14_NIT1	ENSG00000158793	NIT1	down	YES	NO	-0.199148	0.174779	0.355432	0.01317
377.378	-0.854205	0.154503	-5.52871	3.22596e-08	5.94391e-07	ENSG00000162852.14_CNST	ENSG00000162852	CNST	down	YES	NO	-0.249319	0.0874695	0.436425	0.00192841
256.391	1.26981	0.229834	5.52493	3.29625e-08	6.06641e-07	ENSG00000076716.9_GPC4	ENSG00000076716	GPC4	up	YES	NO	0.35018	0.0146883	-0.243783	0.0949674
177.835	1.49754	0.271203	5.52184	3.35476e-08	6.16545e-07	ENSG00000132613.15_MTSS2	ENSG00000132613	MTSS2	up	YES	NO	0.319742	0.0267355	-0.40474	0.00432519
764.483	-1.20322	0.217909	-5.52168	3.35782e-08	6.16545e-07	ENSG00000137767.14_SQOR	ENSG00000137767	SQOR	down	YES	NO	-0.378733	0.00794362	0.452201	0.0012522
92.5005	1.69172	0.306401	5.52126	3.36571e-08	6.1728e-07	ENSG00000136854.24_STXBP1	ENSG00000136854	STXBP1	up	YES	NO	0.361997	0.0114626	-0.351329	0.0143442
96.5049	-2.83074	0.512739	-5.52081	3.37438e-08	6.18156e-07	ENSG00000257524.6_RP11-203J24.9	ENSG00000257524	RP11-203J24	down	YES	NO	-0.183725	0.211298	0.352979	0.0138616
138.641	-1.9367	0.35085	-5.52002	3.38956e-08	6.20223e-07	ENSG00000153233.13_PTPRR	ENSG00000153233	PTPRR	down	YES	NO	-0.328266	0.0227342	0.373939	0.00884026
11.4516	1.77585	0.321916	5.51649	3.45837e-08	6.32086e-07	ENSG00000127423.11_AUNIP	ENSG00000127423	AUNIP	up	YES	NO	0.279533	0.0543344	-0.304388	0.0354248
45.5505	1.62748	0.295085	5.51529	3.48207e-08	6.35688e-07	ENSG00000181218.5_H2AW	ENSG00000181218	H2AW	up	YES	NO	0.100129	0.498322	-0.321732	0.0257524
208.169	1.23324	0.223645	5.51427	3.50232e-08	6.38651e-07	ENSG00000130826.18_DKC1	ENSG00000130826	DKC1	up	YES	NO	0.268391	0.0651168	-0.38884	0.00630748
48.1845	-2.87795	0.521987	-5.51344	3.51885e-08	6.40931e-07	ENSG00000117322.18_CR2	ENSG00000117322	CR2	down	YES	NO	-0.11846	0.422604	0.192848	0.189103
1682.5	-0.623798	0.113149	-5.51308	3.52614e-08	6.41524e-07	ENSG00000197879.17_MYO1C	ENSG00000197879	MYO1C	down	YES	YES	-0.348188	0.0153019	0.423633	0.0026968
439.851	-1.12884	0.204908	-5.50902	3.60838e-08	6.55735e-07	ENSG00000198894.8_CIPC	ENSG00000198894	CIPC	down	YES	NO	-0.44044	0.00173107	0.407607	0.00403292
48.7085	2.44938	0.444651	5.50854	3.61824e-08	6.56777e-07	ENSG00000258947.8_TUBB3	ENSG00000258947	TUBB3	up	YES	NO	0.446964	0.0014485	-0.2881	0.047064
57.7695	1.24027	0.225242	5.5064	3.6624e-08	6.63278e-07	ENSG00000104312.8_RIPK2	ENSG00000104312	RIPK2	up	YES	NO	0.228858	0.11767	-0.290461	0.0452055
35.7411	2.81101	0.51049	5.5065	3.66042e-08	6.63278e-07	ENSG00000163220.11_S100A9	ENSG00000163220	S100A9	up	YES	NO	0.248485	0.0885686	-0.220613	0.131864
86.4565	1.03674	0.188315	5.50535	3.68433e-08	6.66491e-07	ENSG00000125485.17_DDX31	ENSG00000125485	DDX31	up	YES	NO	0.207176	0.157683	-0.327805	0.0229371
214.237	0.970276	0.176263	5.50471	3.69776e-08	6.68161e-07	ENSG00000124228.15_DDX27	ENSG00000124228	DDX27	up	YES	NO	0.39092	0.00600992	-0.409873	0.00381428
96.9478	1.01511	0.184459	5.50317	3.73013e-08	6.73245e-07	ENSG00000149636.16_DSN1	ENSG00000149636	DSN1	up	YES	NO	0.207993	0.156015	-0.384521	0.00696681
46.3685	1.41002	0.256276	5.50195	3.75611e-08	6.76854e-07	ENSG00000118965.16_WDR35	ENSG00000118965	WDR35	up	YES	NO	0.271926	0.0615252	-0.372899	0.00904583
95.0249	1.69391	0.30788	5.50183	3.75864e-08	6.76854e-07	ENSG00000175063.17_UBE2C	ENSG00000175063	UBE2C	up	YES	NO	0.291396	0.0444863	-0.321203	0.0260106
267.318	1.18084	0.214729	5.49919	3.8153e-08	6.8628e-07	ENSG00000166197.17_NOLC1	ENSG00000166197	NOLC1	up	YES	NO	0.31589	0.0287277	-0.408623	0.00393353
146.673	1.97799	0.360277	5.49019	4.01498e-08	7.21381e-07	ENSG00000141756.19_FKBP10	ENSG00000141756	FKBP10	up	YES	NO	0.208225	0.155544	-0.331391	0.0213996
108.138	0.887807	0.161731	5.48941	4.03269e-08	7.23745e-07	ENSG00000162836.12_ACP6	ENSG00000162836	ACP6	up	YES	NO	0.367845	0.0101052	-0.46198	0.000948171
202.037	0.929761	0.169418	5.48798	4.06565e-08	7.28838e-07	ENSG00000152117.17_SMPD4BP	ENSG00000152117	SMPD4BP	up	YES	NO	0.412411	0.00358186	-0.471692	0.000713404
337.632	0.579503	0.105701	5.48248	4.19401e-08	7.51001e-07	ENSG00000108262.16_GIT1	ENSG00000108262	GIT1	up	YES	NO	0.322303	0.0254758	-0.399371	0.00492279
86.857	2.62207	0.478397	5.48096	4.23026e-08	7.56641e-07	ENSG00000262406.3_MMP12	ENSG00000262406	MMP12	up	YES	NO	0.334536	0.0201234	-0.465463	0.000857024
1516.75	-1.11196	0.202901	-5.48034	4.2452e-08	7.5846e-07	ENSG00000149260.18_CAPN5	ENSG00000149260	CAPN5	down	YES	NO	-0.345054	0.0163114	0.448692	0.00138089
173.885	1.10355	0.201437	5.47838	4.29245e-08	7.66041e-07	ENSG00000101407.13_TTI1	ENSG00000101407	TTI1	up	YES	NO	0.246348	0.0914334	-0.301354	0.0373913
124.806	-1.33644	0.24397	-5.47787	4.30477e-08	7.67379e-07	ENSG00000060762.19_MPC1	ENSG00000060762	MPC1	down	YES	NO	-0.304814	0.0351551	0.541999	6.92545e-05
309.53	-1.59188	0.290724	-5.47559	4.36057e-08	7.76455e-07	ENSG00000184828.10_ZBTB7C	ENSG00000184828	ZBTB7C	down	YES	YES	-0.4034	0.00446805	0.469321	0.000765308
1818.62	-0.972707	0.177699	-5.4739	4.40234e-08	7.82553e-07	ENSG00000075539.15_FRYL	ENSG00000075539	FRYL	down	YES	NO	-0.386729	0.00662262	0.466676	0.000827181
534.091	-0.931344	0.170145	-5.47381	4.40466e-08	7.82553e-07	ENSG00000109586.12_GALNT7	ENSG00000109586	GALNT7	down	YES	NO	-0.386891	0.00659805	0.420609	0.00291391
118.279	0.983219	0.179713	5.47105	4.47386e-08	7.9396e-07	ENSG00000146540.15_C7orf50	ENSG00000146540	C7orf50	up	YES	NO	0.210002	0.151967	-0.284641	0.0498974
275.816	-0.901562	0.164818	-5.47006	4.49886e-08	7.97441e-07	ENSG00000110721.12_CHKA	ENSG00000110721	CHKA	down	YES	NO	-0.185672	0.206415	0.315874	0.0287364
549.155	0.892387	0.163146	5.46988	4.5035e-08	7.97441e-07	ENSG00000171552.14_BCL2L1	ENSG00000171552	BCL2L1	up	YES	NO	0.296695	0.0405856	-0.498371	0.000312297
1455.83	-1.29352	0.236552	-5.46822	4.54581e-08	8.04037e-07	ENSG00000050405.13_LIMA1	ENSG00000050405	LIMA1	down	YES	NO	-0.380501	0.00763327	0.484028	0.00049099
95.7927	1.31295	0.240158	5.46702	4.57657e-08	8.06883e-07	ENSG00000101447.15_FAM83D	ENSG00000101447	FAM83D	up	YES	NO	0.229389	0.116798	-0.309382	0.0323737
438.302	-0.933129	0.170684	-5.467	4.57712e-08	8.06883e-07	ENSG00000172936.16_MYD88	ENSG00000172936	MYD88	down	YES	NO	-0.386457	0.00666426	0.36398	0.0109858
302.287	0.785237	0.143623	5.46734	4.56839e-08	8.06883e-07	ENSG00000198700.10_IPO9	ENSG00000198700	IPO9	up	YES	NO	0.269317	0.0641598	-0.354716	0.0133687
107.752	0.851386	0.155761	5.46596	4.60402e-08	8.10726e-07	ENSG00000130305.17_NSUN5	ENSG00000130305	NSUN5	up	YES	NO	0.0760055	0.60764	-0.446458	0.00146885
73.6691	2.05688	0.37659	5.46185	4.71207e-08	8.28835e-07	ENSG00000125508.4_SRMS	ENSG00000125508	SRMS	up	YES	NO	0.23497	0.107921	-0.216913	0.138634
175.85	1.40979	0.258208	5.45988	4.76452e-08	8.37135e-07	ENSG00000204262.14_COL5A2	ENSG00000204262	COL5A2	up	YES	NO	0.136639	0.354414	-0.326786	0.0233905
2953.73	-0.873612	0.160092	-5.45695	4.84389e-08	8.49203e-07	ENSG00000117984.15_CTSD	ENSG00000117984	CTSD	down	YES	NO	-0.395657	0.00537729	0.396709	0.00524504
87.1361	-1.71861	0.314935	-5.45702	4.84198e-08	8.49203e-07	ENSG00000179674.4_ARL14	ENSG00000179674	ARL14	down	YES	NO	-0.391551	0.00592202	0.487136	0.000445879
1846.69	-0.89666	0.16434	-5.45611	4.86671e-08	8.52263e-07	ENSG00000067082.15_KLF6	ENSG00000067082	KLF6	down	YES	NO	-0.195552	0.182855	0.357433	0.0126279
9.93404	-2.40998	0.441854	-5.45426	4.91784e-08	8.6027e-07	ENSG00000243188.1_HNRNPA1P17	ENSG00000243188	HNRNPA1P17	down	YES	NO	-0.295159	0.0416864	0.470818	0.000732165
631.86	1.66502	0.305304	5.45366	4.93439e-08	8.60827e-07	ENSG00000134871.19_COL4A2	ENSG00000134871	COL4A2	up	YES	NO	0.211121	0.149746	-0.291109	0.0447065
130.822	0.729882	0.133836	5.45356	4.93726e-08	8.60827e-07	ENSG00000198000.12_NOL8	ENSG00000198000	NOL8	up	YES	NO	0.246432	0.09132	-0.312691	0.0304745
37.0359	0.949059	0.174024	5.45361	4.93569e-08	8.60827e-07	ENSG00000213588.6_ZBTB9	ENSG00000213588	ZBTB9	up	YES	NO	0.25702	0.0778154	-0.237722	0.103739
42.0241	2.72057	0.498881	5.45334	4.94334e-08	8.60942e-07	ENSG00000136002.20_ARHGEF4	ENSG00000136002	ARHGEF4	up	YES	NO	0.286993	0.047956	-0.407439	0.00404952
74.7851	0.869678	0.159543	5.45105	5.0073e-08	8.71129e-07	ENSG00000166860.3_ZBTB39	ENSG00000166860	ZBTB39	up	YES	NO	0.244091	0.0945385	-0.351089	0.0144153
241.178	-0.990559	0.181733	-5.45062	5.01945e-08	8.72288e-07	ENSG00000196116.8_TDRD7	ENSG00000196116	TDRD7	down	YES	YES	-0.344494	0.0164978	0.461214	0.00096933
428.117	-0.698744	0.128209	-5.45003	5.03613e-08	8.74231e-07	ENSG00000167193.8_CRK	ENSG00000167193	CRK	down	YES	NO	-0.336449	0.019379	0.464527	0.000880718
195.739	-0.83756	0.153715	-5.44878	5.07163e-08	8.79433e-07	ENSG00000144909.8_OSBPL11	ENSG00000144909	OSBPL11	down	YES	NO	-0.346308	0.015901	0.45397	0.00119149
395.005	-0.778116	0.142823	-5.44813	5.09027e-08	8.81703e-07	ENSG00000111670.16_GNPTAB	ENSG00000111670	GNPTAB	down	YES	NO	-0.35879	0.0122713	0.38117	0.0075187
273.605	0.808769	0.148472	5.44728	5.11461e-08	8.84788e-07	ENSG00000162430.18_SELENON	ENSG00000162430	SELENON	up	YES	NO	0.245673	0.0923532	-0.327501	0.0230713
66.0387	-1.57519	0.289179	-5.44712	5.1192e-08	8.84788e-07	ENSG00000287045.1_RP11-190C21.5	ENSG00000287045	RP11-190C21	down	YES	NO	-0.213904	0.144328	0.466379	0.000834408
562.432	0.775424	0.142364	5.44677	5.12925e-08	8.85562e-07	ENSG00000106397.12_PLOD3	ENSG00000106397	PLOD3	up	YES	NO	0.233063	0.110895	-0.428847	0.0023559
541.089	-0.798605	0.146677	-5.44465	5.19084e-08	8.95224e-07	ENSG00000136436.15_CALCOCO2	ENSG00000136436	CALCOCO2	down	YES	NO	-0.273199	0.0602719	0.510567	0.000209192
43.9371	1.97409	0.362587	5.44445	5.1966e-08	8.95245e-07	ENSG00000054598.9_FOXC1	ENSG00000054598	FOXC1	up	YES	NO	0.444225	0.0015617	-0.282729	0.0515226
234.224	-0.588128	0.108063	-5.44245	5.25534e-08	9.04385e-07	ENSG00000138032.21_PPM1B	ENSG00000138032	PPM1B	down	YES	NO	-0.352315	0.014054	0.342929	0.0170277
56.1429	1.90954	0.351085	5.43895	5.35943e-08	9.213e-07	ENSG00000272899.4_ATP6V1FNB	ENSG00000272899	ATP6V1FNB	up	YES	NO	0.179786	0.221423	-0.251116	0.0851369
594.759	-2.04131	0.375365	-5.4382	5.38217e-08	9.24211e-07	ENSG00000253958.2_CLDN23	ENSG00000253958	CLDN23	down	YES	NO	-0.323529	0.0248908	0.449185	0.00136214
77.5086	1.31886	0.242538	5.43774	5.39614e-08	9.2561e-07	ENSG00000004660.15_CAMKK1	ENSG00000004660	CAMKK1	up	YES	NO	0.278046	0.0556841	-0.300965	0.0376496
54.9045	-1.14659	0.210893	-5.43687	5.42256e-08	9.2914e-07	ENSG00000122035.7_RASL11A	ENSG00000122035	RASL11A	down	YES	NO	-0.326647	0.0234528	0.546285	5.90519e-05
582.162	0.995178	0.183074	5.43594	5.45072e-08	9.32959e-07	ENSG00000171456.20_ASXL1	ENSG00000171456	ASXL1	up	YES	YES	0.330976	0.0215729	-0.44024	0.00174045
481.604	0.899918	0.165569	5.43532	5.46986e-08	9.35229e-07	ENSG00000213923.13_CSNK1E	ENSG00000213923	CSNK1E	up	YES	NO	0.504038	0.00025973	-0.459508	0.00101802
559.198	-1.1083	0.204034	-5.43191	5.57552e-08	9.52271e-07	ENSG00000081320.11_STK17B	ENSG00000081320	STK17B	down	YES	NO	-0.182271	0.214996	0.329265	0.0223
428.336	-0.7842	0.144383	-5.43138	5.59185e-08	9.54035e-07	ENSG00000140750.17_ARHGAP17	ENSG00000140750	ARHGAP17	down	YES	NO	-0.32055	0.0263324	0.384151	0.00702597
29.8864	1.62211	0.298706	5.43047	5.6207e-08	9.57929e-07	ENSG00000148848.15_ADAM12	ENSG00000148848	ADAM12	up	YES	NO	0.431196	0.00221522	-0.411619	0.00365303
112.501	1.02675	0.189136	5.42865	5.67834e-08	9.66716e-07	ENSG00000188807.13_TMEM201	ENSG00000188807	TMEM201	up	YES	NO	0.253422	0.082215	-0.349455	0.0149091
19.4558	1.03459	0.190609	5.4278	5.70525e-08	9.70259e-07	ENSG00000159685.11_CHCHD6	ENSG00000159685	CHCHD6	up	YES	NO	0.390196	0.00611208	-0.363201	0.0111711
76.6084	-1.85505	0.341857	-5.42638	5.75069e-08	9.76941e-07	ENSG00000254827.6_SLC22A18AS	ENSG00000254827	SLC22A18AS	down	YES	NO	-0.374878	0.00865809	0.456777	0.00110051
470.158	0.953375	0.175852	5.42147	5.91114e-08	1.00313e-06	ENSG00000204394.13_VARS1	ENSG00000204394	VARS1	up	YES	NO	0.249801	0.0868379	-0.315508	0.0289318
49.0065	3.02378	0.558085	5.41814	6.02226e-08	1.02089e-06	ENSG00000163083.6_INHBB	ENSG00000163083	INHBB	up	YES	NO	0.229576	0.116491	-0.265759	0.067898
2493.75	-1.79794	0.331876	-5.4175	6.04375e-08	1.02345e-06	ENSG00000117472.10_TSPAN1	ENSG00000117472	TSPAN1	down	YES	NO	-0.364158	0.0109438	0.477642	0.000596809
12.8145	1.57594	0.290924	5.41703	6.05967e-08	1.02505e-06	ENSG00000271155.1_RP11-435O5.5	ENSG00000271155	RP11-435O5	up	YES	NO	0.316059	0.0286376	-0.311951	0.0308911
68.8601	0.815797	0.150617	5.41638	6.08168e-08	1.02768e-06	ENSG00000078319.10_PMS2P1	ENSG00000078319	PMS2P1	up	YES	NO	0.219392	0.13407	-0.4604	0.0009923
13.2593	-2.02587	0.374156	-5.41451	6.1458e-08	1.03741e-06	ENSG00000280119.1_AC093642.1	ENSG00000280119	AC093642	down	YES	NO	-0.238818	0.102109	0.335816	0.0196225
856.068	-1.74794	0.322963	-5.41218	6.22629e-08	1.04877e-06	ENSG00000125775.15_SDCBP2	ENSG00000125775	SDCBP2	down	YES	NO	-0.350291	0.0146548	0.450974	0.00129594
667.179	1.36327	0.251885	5.41228	6.22274e-08	1.04877e-06	ENSG00000159335.18_PTMS	ENSG00000159335	PTMS	up	YES	NO	0.232903	0.111147	-0.319253	0.0269819
111.719	-0.916321	0.169337	-5.41121	6.25995e-08	1.05333e-06	ENSG00000152465.18_NMT2	ENSG00000152465	NMT2	down	YES	NO	-0.454072	0.00118806	0.476123	0.000624814
185.884	0.813272	0.15037	5.40849	6.35593e-08	1.06835e-06	ENSG00000226479.4_TMEM185B	ENSG00000226479	TMEM185B	up	YES	NO	0.0651207	0.660122	-0.373472	0.00893214
362.288	3.98338	0.736612	5.40771	6.38355e-08	1.07186e-06	ENSG00000215182.8_MUC5AC	ENSG00000215182	MUC5AC	up	YES	NO	0.327908	0.0228915	-0.36039	0.011862
157.167	0.554745	0.102636	5.40498	6.48172e-08	1.08719e-06	ENSG00000106290.15_TAF6	ENSG00000106290	TAF6	up	YES	YES	0.216683	0.139063	-0.339263	0.0183261
254.931	-2.00653	0.371361	-5.4032	6.54631e-08	1.09664e-06	ENSG00000166391.15_MOGAT2	ENSG00000166391	MOGAT2	down	YES	NO	-0.429396	0.00232235	0.590648	9.90276e-06
265.97	0.941125	0.174184	5.40305	6.55183e-08	1.09664e-06	ENSG00000187764.12_SEMA4D	ENSG00000187764	SEMA4D	up	YES	NO	0.414128	0.00343178	-0.412508	0.00357325
198.962	-1.55946	0.288753	-5.40069	6.63867e-08	1.11001e-06	ENSG00000131781.13_FMO5	ENSG00000131781	FMO5	down	YES	NO	-0.348211	0.0152949	0.451545	0.0012754
964.811	-0.940575	0.174227	-5.39856	6.71784e-08	1.122e-06	ENSG00000135540.11_NHSL1	ENSG00000135540	NHSL1	down	YES	NO	-0.358826	0.012262	0.505033	0.000251375
33.7555	1.30921	0.242519	5.39838	6.72453e-08	1.122e-06	ENSG00000197763.20_TXNRD3	ENSG00000197763	TXNRD3	up	YES	NO	0.225682	0.122994	-0.369081	0.00983674
176.421	-2.1957	0.406944	-5.3956	6.82968e-08	1.13835e-06	ENSG00000163520.14_FBLN2	ENSG00000163520	FBLN2	down	YES	NO	-0.328351	0.0226968	0.338724	0.0185241
326.708	-0.874186	0.162062	-5.39415	6.8848e-08	1.14634e-06	ENSG00000172197.11_MBOAT1	ENSG00000172197	MBOAT1	down	YES	NO	-0.347374	0.0155589	0.474609	0.000653905
390.788	1.21114	0.224604	5.39233	6.95491e-08	1.15559e-06	ENSG00000138031.15_ADCY3	ENSG00000138031	ADCY3	up	YES	NO	0.264494	0.069268	-0.367288	0.0102282
55.0629	1.70566	0.316305	5.39246	6.94995e-08	1.15559e-06	ENSG00000138606.19_SHF	ENSG00000138606	SHF	up	YES	NO	0.28864	0.0466334	-0.212151	0.147723
63.787	1.26696	0.234985	5.39168	6.98001e-08	1.15855e-06	ENSG00000132879.14_FBXO44	ENSG00000132879	FBXO44	up	YES	NO	0.358089	0.0124544	-0.378777	0.00793575
453.607	0.884651	0.164129	5.38998	7.04639e-08	1.16835e-06	ENSG00000120889.13_TNFRSF10B	ENSG00000120889	TNFRSF10B	up	YES	NO	0.424634	0.00262817	-0.36487	0.0107774
168.31	0.815661	0.151363	5.38877	7.09429e-08	1.17507e-06	ENSG00000141101.13_NOB1	ENSG00000141101	NOB1	up	YES	NO	0.260906	0.0732729	-0.378686	0.00795194
1496.19	0.73791	0.136961	5.38776	7.1342e-08	1.18045e-06	ENSG00000089154.11_GCN1	ENSG00000089154	GCN1	up	YES	NO	0.300095	0.0382335	-0.456985	0.00109401
176.826	0.843944	0.156712	5.38533	7.23112e-08	1.19524e-06	ENSG00000067955.15_CBFB	ENSG00000067955	CBFB	up	YES	NO	0.374755	0.00868166	-0.310054	0.0319802
554.345	-0.873426	0.162242	-5.38349	7.30571e-08	1.20631e-06	ENSG00000162390.18_ACOT11	ENSG00000162390	ACOT11	down	YES	NO	-0.316572	0.028366	0.369241	0.00980241
218.313	0.842624	0.156538	5.38286	7.33131e-08	1.20929e-06	ENSG00000187231.14_SESTD1	ENSG00000187231	SESTD1	up	YES	NO	0.307437	0.0335352	-0.353395	0.0137421
635.469	-1.26684	0.235412	-5.38138	7.39171e-08	1.21799e-06	ENSG00000110013.13_SIAE	ENSG00000110013	SIAE	down	YES	NO	-0.284983	0.0496114	0.506821	0.000236974
153.048	-0.782107	0.14535	-5.38084	7.41398e-08	1.22039e-06	ENSG00000117305.15_HMGCL	ENSG00000117305	HMGCL	down	YES	NO	-0.368443	0.0099745	0.402072	0.00461367
1015.51	-0.972336	0.180737	-5.37982	7.45589e-08	1.22475e-06	ENSG00000165959.12_CLMN	ENSG00000165959	CLMN	down	YES	NO	-0.385071	0.00687957	0.389884	0.00615662
359.056	-1.17138	0.217734	-5.37989	7.45314e-08	1.22475e-06	ENSG00000181350.12_LRRC75A	ENSG00000181350	LRRC75A	down	YES	NO	-0.266544	0.0670593	0.333086	0.0207032
63.4997	-1.24653	0.231741	-5.37898	7.49098e-08	1.22925e-06	ENSG00000258311.5_RP11-644F5.10	ENSG00000258311	RP11-644F5	down	YES	NO	-0.246638	0.0910413	0.447313	0.0014346
982.438	-0.72393	0.1346	-5.37837	7.51652e-08	1.23217e-06	ENSG00000109787.13_KLF3	ENSG00000109787	KLF3	down	YES	NO	-0.243165	0.0958348	0.417476	0.00315495
5294.83	-2.20831	0.410672	-5.3773	7.56092e-08	1.23817e-06	ENSG00000171431.4_KRT20	ENSG00000171431	KRT20	down	YES	NO	-0.393085	0.00571316	0.536494	8.4722e-05
119.054	0.882432	0.16415	5.37576	7.62592e-08	1.24753e-06	ENSG00000130810.20_PPAN	ENSG00000130810	PPAN	up	YES	NO	0.349876	0.0147806	-0.471436	0.000718847
109.547	-3.229	0.600753	-5.37493	7.66122e-08	1.25201e-06	ENSG00000104332.12_SFRP1	ENSG00000104332	SFRP1	down	YES	YES	-0.416396	0.00324197	0.44079	0.00171476
535.692	-0.638897	0.118877	-5.37442	7.68286e-08	1.25426e-06	ENSG00000172869.15_DMXL1	ENSG00000172869	DMXL1	down	YES	NO	-0.259887	0.0744431	0.495849	0.000338645
183.058	-0.859265	0.159924	-5.37296	7.74557e-08	1.2632e-06	ENSG00000067064.12_IDI1	ENSG00000067064	IDI1	down	YES	NO	-0.266029	0.0676081	0.461098	0.00097257
283.271	-1.51921	0.282844	-5.3712	7.8213e-08	1.27425e-06	ENSG00000106688.12_SLC1A1	ENSG00000106688	SLC1A1	down	YES	NO	-0.253803	0.0817407	0.315499	0.0289364
168.847	1.19012	0.22178	5.36622	8.04044e-08	1.30861e-06	ENSG00000138074.15_SLC5A6	ENSG00000138074	SLC5A6	up	YES	NO	0.174231	0.236264	-0.373049	0.00901589
57.414	0.841071	0.156794	5.36417	8.13204e-08	1.32216e-06	ENSG00000110987.9_BCL7A	ENSG00000110987	BCL7A	up	YES	NO	0.264487	0.0692759	-0.31758	0.0278387
246.345	1.1184	0.208518	5.36358	8.15879e-08	1.32516e-06	ENSG00000102316.17_MAGED2	ENSG00000102316	MAGED2	up	YES	NO	0.156882	0.286935	-0.252425	0.0834684
182.705	1.84874	0.344978	5.359	8.36857e-08	1.35784e-06	ENSG00000088340.17_FER1L4	ENSG00000088340	FER1L4	up	YES	NO	0.360267	0.0118929	-0.259506	0.0748848
96.314	0.747729	0.139552	5.35807	8.41143e-08	1.36341e-06	ENSG00000065989.16_PDE4A	ENSG00000065989	PDE4A	up	YES	NO	0.0792772	0.592225	-0.263988	0.0698218
885.092	-0.695864	0.12989	-5.35734	8.44572e-08	1.36757e-06	ENSG00000115762.16_PLEKHB2	ENSG00000115762	PLEKHB2	down	YES	NO	-0.272148	0.0613053	0.353178	0.0138042
94.2857	1.66053	0.310181	5.35344	8.6299e-08	1.39597e-06	ENSG00000111674.9_ENO2	ENSG00000111674	ENO2	up	YES	NO	0.396713	0.00524446	-0.246078	0.0918005
80.204	1.68319	0.314454	5.35273	8.66352e-08	1.39999e-06	ENSG00000164690.8_SHH	ENSG00000164690	SHH	up	YES	NO	0.3188	0.0272115	-0.438597	0.00181931
483.473	-1.48499	0.277461	-5.35209	8.69456e-08	1.40358e-06	ENSG00000115129.14_TP53I3	ENSG00000115129	TP53I3	down	YES	NO	-0.319392	0.0269117	0.363388	0.0111263
235.078	0.762015	0.142382	5.35189	8.70398e-08	1.40367e-06	ENSG00000196363.10_WDR5	ENSG00000196363	WDR5	up	YES	YES	0.173481	0.23832	-0.360767	0.0117672
133.22	0.8892	0.166199	5.35022	8.78458e-08	1.41523e-06	ENSG00000071462.12_BUD23	ENSG00000071462	BUD23	up	YES	NO	0.235689	0.106816	-0.327671	0.0229963
2291.2	-1.20774	0.225744	-5.35004	8.79345e-08	1.41523e-06	ENSG00000163694.15_RBM47	ENSG00000163694	RBM47	down	YES	NO	-0.3058	0.0345389	0.410228	0.00378101
104.296	-1.37038	0.256251	-5.34779	8.90338e-08	1.43147e-06	ENSG00000156869.14_FRRS1	ENSG00000156869	FRRS1	down	YES	NO	-0.304613	0.0352821	0.358198	0.0124259
228.082	3.71497	0.694915	5.34593	8.99536e-08	1.4448e-06	ENSG00000015413.9_DPEP1	ENSG00000015413	DPEP1	up	YES	NO	0.231377	0.113574	-0.345942	0.0160197
180.479	0.973699	0.182193	5.34432	9.07559e-08	1.45622e-06	ENSG00000165271.17_NOL6	ENSG00000165271	NOL6	up	YES	NO	0.353929	0.0135901	-0.314274	0.0295993
71.0967	1.59827	0.29912	5.34326	9.12909e-08	1.46185e-06	ENSG00000135245.10_HILPDA	ENSG00000135245	HILPDA	up	YES	NO	0.178211	0.225564	-0.485162	0.000474068
29.0209	-1.7951	0.335952	-5.34332	9.12591e-08	1.46185e-06	ENSG00000171658.8_NMRAL2P	ENSG00000171658	NMRAL2P	down	YES	NO	-0.277861	0.0558538	0.431167	0.00221692
243.858	-0.527994	0.0988503	-5.34135	9.22553e-08	1.47581e-06	ENSG00000153066.13_TXNDC11	ENSG00000153066	TXNDC11	down	YES	NO	-0.263058	0.070849	0.460688	0.000984129
252.425	-0.602902	0.112883	-5.34095	9.24628e-08	1.47764e-06	ENSG00000100150.20_DEPDC5	ENSG00000100150	DEPDC5	down	YES	NO	-0.183935	0.210768	0.327457	0.0230909
240.352	-1.25577	0.235297	-5.33696	9.45184e-08	1.50897e-06	ENSG00000154274.15_C4orf19	ENSG00000154274	C4orf19	down	YES	NO	-0.339413	0.0182715	0.499536	0.000300762
1986.73	-3.65578	0.685192	-5.33541	9.53282e-08	1.52037e-06	ENSG00000103375.11_AQP8	ENSG00000103375	AQP8	down	YES	NO	-0.394893	0.00547522	0.513961	0.000186612
113.365	0.908761	0.170344	5.33484	9.56263e-08	1.5236e-06	ENSG00000137161.17_CNPY3	ENSG00000137161	CNPY3	up	YES	NO	0.226599	0.121439	-0.526273	0.000122051
598.735	-0.85403	0.160165	-5.33217	9.70435e-08	1.54463e-06	ENSG00000140497.16_SCAMP2	ENSG00000140497	SCAMP2	down	YES	NO	-0.429735	0.00230182	0.464342	0.000885465
930.389	-1.21443	0.227767	-5.33191	9.71831e-08	1.54531e-06	ENSG00000111424.12_VDR	ENSG00000111424	VDR	down	YES	YES	-0.404972	0.00430081	0.45557	0.00113885
77.0018	-1.96403	0.368424	-5.3309	9.7728e-08	1.55242e-06	ENSG00000172318.5_B3GALT1	ENSG00000172318	B3GALT1	down	YES	NO	-0.320665	0.0262758	0.551782	4.79824e-05
57.8311	1.24557	0.233703	5.3297	9.83772e-08	1.56117e-06	ENSG00000128059.8_PPAT	ENSG00000128059	PPAT	up	YES	NO	0.287258	0.0477411	-0.344609	0.0164594
619.594	-1.00282	0.188171	-5.32929	9.85987e-08	1.56313e-06	ENSG00000100221.11_JOSD1	ENSG00000100221	JOSD1	down	YES	NO	-0.277569	0.0561227	0.403208	0.00448882
149.888	-1.76581	0.331401	-5.32831	9.91323e-08	1.57002e-06	ENSG00000164342.13_TLR3	ENSG00000164342	TLR3	down	YES	NO	-0.288978	0.0463657	0.451345	0.00128258
235.75	1.16776	0.219225	5.32678	9.99692e-08	1.5817e-06	ENSG00000127586.17_CHTF18	ENSG00000127586	CHTF18	up	YES	NO	0.387521	0.00650288	-0.330847	0.0216269
19.6631	1.39904	0.26267	5.32621	1.00284e-07	1.5851e-06	ENSG00000105948.13_TTC26	ENSG00000105948	TTC26	up	YES	NO	0.162105	0.270988	-0.2778	0.0559094
30.4924	-1.71752	0.322528	-5.32516	1.00864e-07	1.59268e-06	ENSG00000233217.2_MROH3P	ENSG00000233217	MROH3P	down	YES	NO	-0.227701	0.11959	0.393823	0.00561503
152.001	1.18759	0.223028	5.32486	1.01031e-07	1.59374e-06	ENSG00000106070.20_GRB10	ENSG00000106070	GRB10	up	YES	NO	0.226672	0.121315	-0.358144	0.0124401
246.245	1.73622	0.326161	5.32321	1.0195e-07	1.60665e-06	ENSG00000162366.8_PDZK1IP1	ENSG00000162366	PDZK1IP1	up	YES	NO	0.28343	0.0509221	-0.411498	0.00366398
2272.07	0.597002	0.112191	5.32131	1.03022e-07	1.62194e-06	ENSG00000086758.16_HUWE1	ENSG00000086758	HUWE1	up	YES	YES	0.247897	0.0893496	-0.292384	0.0437369
103.13	-2.39828	0.450814	-5.31989	1.0383e-07	1.63304e-06	ENSG00000163295.5_ALPI	ENSG00000163295	ALPI	down	YES	NO	-0.351009	0.0144392	0.447448	0.00142925
199.114	1.05801	0.198893	5.31947	1.04068e-07	1.63516e-06	ENSG00000157617.17_C2CD2	ENSG00000157617	C2CD2	up	YES	NO	0.211991	0.148037	-0.430586	0.00225101
171.773	-1.33624	0.251265	-5.31805	1.04887e-07	1.64641e-06	ENSG00000101695.9_RNF125	ENSG00000101695	RNF125	down	YES	NO	-0.275131	0.058408	0.414338	0.00341383
1332.92	0.745621	0.140211	5.31786	1.04996e-07	1.6465e-06	ENSG00000275023.5_MLLT6	ENSG00000275023	MLLT6	up	YES	NO	0.422121	0.00280353	-0.421954	0.0028155
60.1036	0.839144	0.157825	5.31693	1.05535e-07	1.65331e-06	ENSG00000185420.19_SMYD3	ENSG00000185420	SMYD3	up	YES	YES	0.352104	0.0141157	-0.397821	0.0051082
311.825	0.787441	0.148189	5.31377	1.07379e-07	1.68054e-06	ENSG00000075391.17_RASAL2	ENSG00000075391	RASAL2	up	YES	NO	0.354393	0.0134594	-0.498668	0.000309323
116.725	0.811443	0.152735	5.31275	1.07984e-07	1.68836e-06	ENSG00000136811.16_ODF2	ENSG00000136811	ODF2	up	YES	NO	0.441592	0.00167785	-0.364448	0.0108758
334.666	0.745891	0.140414	5.3121	1.08368e-07	1.69269e-06	ENSG00000196365.12_LONP1	ENSG00000196365	LONP1	up	YES	NO	0.239861	0.100575	-0.386844	0.00660517
65.0982	-1.79438	0.337834	-5.31143	1.08767e-07	1.69725e-06	ENSG00000167117.10_ANKRD40CL	ENSG00000167117	ANKRD40CL	down	YES	NO	-0.407677	0.00402601	0.523489	0.000134545
228.992	-0.621793	0.117077	-5.31095	1.09053e-07	1.70005e-06	ENSG00000100325.15_ASCC2	ENSG00000100325	ASCC2	down	YES	NO	-0.286187	0.0486147	0.427918	0.00241371
38.1413	-1.31298	0.247459	-5.30583	1.12158e-07	1.74675e-06	ENSG00000182168.15_UNC5C	ENSG00000182168	UNC5C	down	YES	NO	-0.306754	0.0339511	0.481302	0.000533892
324.163	1.61692	0.30483	5.30433	1.13087e-07	1.75948e-06	ENSG00000088325.16_TPX2	ENSG00000088325	TPX2	up	YES	NO	0.322336	0.0254601	-0.300123	0.0382141
277.386	-1.27091	0.239616	-5.30396	1.13318e-07	1.76136e-06	ENSG00000159200.18_RCAN1	ENSG00000159200	RCAN1	down	YES	NO	-0.265566	0.0681058	0.454206	0.00118359
354.082	-2.06821	0.390149	-5.30106	1.1513e-07	1.78778e-06	ENSG00000095110.8_NXPE1	ENSG00000095110	NXPE1	down	YES	NO	-0.26787	0.0656605	0.529621	0.000108436
161.556	0.92196	0.173947	5.30024	1.15651e-07	1.79412e-06	ENSG00000013523.11_ANGEL1	ENSG00000013523	ANGEL1	up	YES	NO	0.189826	0.196262	-0.341069	0.0176766
10.6052	2.6629	0.502842	5.29571	1.18554e-07	1.83736e-06	ENSG00000222033.1_LINC01124	ENSG00000222033	LINC01124	up	YES	NO	0.292893	0.0433545	-0.498674	0.00030926
153.84	0.788683	0.148937	5.29542	1.18744e-07	1.8385e-06	ENSG00000165689.17_ENTR1	ENSG00000165689	ENTR1	up	YES	NO	0.319071	0.0270739	-0.443416	0.00159661
99.9462	0.847127	0.16	5.29456	1.19305e-07	1.8454e-06	ENSG00000101146.13_RAE1	ENSG00000101146	RAE1	up	YES	NO	0.169251	0.250138	-0.254007	0.081487
487.938	-1.95759	0.369759	-5.29424	1.19511e-07	1.84678e-06	ENSG00000115616.3_SLC9A2	ENSG00000115616	SLC9A2	down	YES	NO	-0.422357	0.0027866	0.448735	0.00137923
194.405	-1.13735	0.214876	-5.29305	1.20293e-07	1.85706e-06	ENSG00000173599.15_PC	ENSG00000173599	PC	down	YES	NO	-0.231329	0.113653	0.429419	0.00232091
118.345	0.810826	0.153289	5.28951	1.22646e-07	1.88877e-06	ENSG00000101138.12_CSTF1	ENSG00000101138	CSTF1	up	YES	NO	0.21542	0.141438	-0.361683	0.0115398
78.6779	0.745878	0.141013	5.28942	1.22703e-07	1.88877e-06	ENSG00000171159.5_C9orf16	ENSG00000171159	C9orf16	up	YES	NO	0.372122	0.00920231	-0.353093	0.0138289
635.561	-0.596844	0.112836	-5.28948	1.22663e-07	1.88877e-06	ENSG00000174373.17_RALGAPA1	ENSG00000174373	RALGAPA1	down	YES	NO	-0.41034	0.00377058	0.343335	0.0168888
155.755	-0.820908	0.15521	-5.28901	1.22978e-07	1.89117e-06	ENSG00000166946.14_CCNDBP1	ENSG00000166946	CCNDBP1	down	YES	NO	-0.238373	0.102768	0.35989	0.0119886
150.988	-1.33974	0.253335	-5.28844	1.23363e-07	1.89526e-06	ENSG00000253313.6_C1orf210	ENSG00000253313	C1orf210	down	YES	NO	-0.443505	0.00159273	0.471064	0.000726838
431.601	-1.49105	0.282005	-5.28731	1.24131e-07	1.90442e-06	ENSG00000107731.12_UNC5B	ENSG00000107731	UNC5B	down	YES	NO	-0.417874	0.00312341	0.430357	0.00226455
306.148	-0.598432	0.113185	-5.28721	1.24198e-07	1.90442e-06	ENSG00000164144.16_ARFIP1	ENSG00000164144	ARFIP1	down	YES	NO	-0.457078	0.00109113	0.38645	0.00666536
321.222	2.40968	0.455878	5.2858	1.25157e-07	1.91726e-06	ENSG00000184557.4_SOCS3	ENSG00000184557	SOCS3	up	YES	NO	0.516474	0.000171346	-0.272544	0.0609143
54.0378	1.49296	0.282523	5.2844	1.26117e-07	1.93011e-06	ENSG00000196584.3_XRCC2	ENSG00000196584	XRCC2	up	YES	NO	0.274421	0.0590874	-0.342267	0.0172562
66.9648	3.31904	0.628271	5.28282	1.27211e-07	1.94498e-06	ENSG00000196549.13_MME	ENSG00000196549	MME	up	YES	NO	0.280878	0.0531364	-0.373976	0.00883294
33.8486	-0.959271	0.18159	-5.28262	1.2735e-07	1.94525e-06	ENSG00000170270.5_GON7	ENSG00000170270	GON7	down	YES	NO	-0.44824	0.00139831	0.41134	0.00367839
1056.07	-1.05565	0.199851	-5.28219	1.27648e-07	1.94791e-06	ENSG00000155366.17_RHOC	ENSG00000155366	RHOC	down	YES	NO	-0.334276	0.0202261	0.326625	0.0234629
112.986	1.10513	0.209233	5.28179	1.27928e-07	1.95032e-06	ENSG00000176022.7_B3GALT6	ENSG00000176022	B3GALT6	up	YES	NO	0.180442	0.219715	-0.447809	0.00141505
4577.19	-2.86562	0.542599	-5.28129	1.28278e-07	1.95378e-06	ENSG00000016602.9_CLCA4	ENSG00000016602	CLCA4	down	YES	NO	-0.320239	0.0264871	0.519174	0.000156218
1470.86	-0.69868	0.132309	-5.28067	1.28713e-07	1.95853e-06	ENSG00000071127.17_WDR1	ENSG00000071127	WDR1	down	YES	NO	-0.346816	0.0157373	0.466975	0.000819955
30.8662	1.17868	0.223227	5.28017	1.29062e-07	1.96196e-06	ENSG00000234432.4_RP11-1275H24.1	ENSG00000234432	RP11-1275H24	up	YES	NO	0.250432	0.0860183	-0.228081	0.118956
206.299	1.09817	0.207991	5.27988	1.29266e-07	1.96318e-06	ENSG00000180891.13_CUEDC1	ENSG00000180891	CUEDC1	up	YES	NO	0.241869	0.097674	-0.328886	0.0224638
1181.26	-2.14667	0.406677	-5.27856	1.30206e-07	1.97557e-06	ENSG00000124253.11_PCK1	ENSG00000124253	PCK1	down	YES	NO	-0.342764	0.0170847	0.36783	0.0101084
54.6079	1.05999	0.200822	5.27823	1.30436e-07	1.97718e-06	ENSG00000196976.7_LAGE3	ENSG00000196976	LAGE3	up	YES	NO	0.241027	0.0988823	-0.383065	0.00720209
77.459	1.0559	0.200055	5.27802	1.30586e-07	1.97757e-06	ENSG00000183077.15_AFMID	ENSG00000183077	AFMID	up	YES	NO	0.234687	0.108358	-0.319636	0.0267885
226.885	-1.50178	0.284545	-5.27781	1.30733e-07	1.97792e-06	ENSG00000169860.7_P2RY1	ENSG00000169860	P2RY1	down	YES	NO	-0.412667	0.00355916	0.488998	0.000420683
26.6204	1.09679	0.207829	5.2774	1.31031e-07	1.98053e-06	ENSG00000145220.14_LYAR	ENSG00000145220	LYAR	up	YES	NO	0.383535	0.00712541	-0.329282	0.0222926
30.7075	1.29045	0.244564	5.27655	1.31639e-07	1.98783e-06	ENSG00000056277.16_ZNF280C	ENSG00000056277	ZNF280C	up	YES	NO	0.246019	0.0918819	-0.269768	0.0636986
335.543	-1.07996	0.204681	-5.27632	1.31804e-07	1.98844e-06	ENSG00000137364.5_TPMT	ENSG00000137364	TPMT	down	YES	NO	-0.362605	0.0113144	0.40475	0.00432408
95.5186	0.896848	0.170014	5.27513	1.32664e-07	1.99951e-06	ENSG00000148335.15_NTMT1	ENSG00000148335	NTMT1	up	YES	NO	0.44708	0.00144385	-0.422092	0.00280559
637.877	-0.873846	0.165699	-5.27369	1.33708e-07	2.01335e-06	ENSG00000100614.18_PPM1A	ENSG00000100614	PPM1A	down	YES	NO	-0.324702	0.0243415	0.390081	0.0061284
82.1229	2.65431	0.503512	5.2716	1.3524e-07	2.03448e-06	ENSG00000184956.16_MUC6	ENSG00000184956	MUC6	up	YES	NO	0.235671	0.106843	-0.149232	0.311375
60.7676	0.603565	0.114553	5.26889	1.37255e-07	2.06089e-06	ENSG00000136682.15_CBWD2	ENSG00000136682	CBWD2	up	YES	NO	0.272194	0.0612599	-0.323448	0.0249291
316.179	-0.892458	0.16939	-5.26865	1.37429e-07	2.06157e-06	ENSG00000111726.13_CMAS	ENSG00000111726	CMAS	down	YES	NO	-0.352166	0.0140975	0.397644	0.00512981
64.1936	1.15893	0.220056	5.2665	1.39052e-07	2.08394e-06	ENSG00000164430.17_CGAS	ENSG00000164430	CGAS	up	YES	NO	0.219694	0.13352	-0.548312	5.47226e-05
34.536	2.80382	0.532468	5.2657	1.39653e-07	2.09097e-06	ENSG00000204335.4_SP5	ENSG00000204335	SP5	up	YES	NO	0.346635	0.0157953	-0.473525	0.000675481
15.9367	-1.67169	0.31748	-5.26552	1.39796e-07	2.09116e-06	ENSG00000007264.15_MATK	ENSG00000007264	MATK	down	YES	NO	-0.261317	0.0728054	0.413623	0.00347533
143.214	1.33688	0.253914	5.26509	1.40124e-07	2.09409e-06	ENSG00000162073.14_PAQR4	ENSG00000162073	PAQR4	up	YES	NO	0.277218	0.0564472	-0.408126	0.00398189
222.869	-0.851219	0.161719	-5.26358	1.41274e-07	2.10929e-06	ENSG00000047346.13_FAM214A	ENSG00000047346	FAM214A	down	YES	NO	-0.214782	0.142648	0.519542	0.000154254
526.549	-3.20304	0.608556	-5.26334	1.41465e-07	2.11016e-06	ENSG00000142959.5_BEST4	ENSG00000142959	BEST4	down	YES	NO	-0.346167	0.0159466	0.497097	0.000325364
143.96	1.30301	0.247617	5.26219	1.42352e-07	2.12141e-06	ENSG00000168758.11_SEMA4C	ENSG00000168758	SEMA4C	up	YES	NO	0.343675	0.0167734	-0.440178	0.00174336
580.315	2.3577	0.44834	5.25873	1.45055e-07	2.15764e-06	ENSG00000148346.12_LCN2	ENSG00000148346	LCN2	up	YES	NO	0.329236	0.0223125	-0.319377	0.026919
166.411	1.84509	0.350977	5.25701	1.4642e-07	2.17591e-06	ENSG00000102359.9_SRPX2	ENSG00000102359	SRPX2	up	YES	NO	0.0546333	0.71227	-0.121658	0.410097
138.925	-0.529192	0.100668	-5.25682	1.46568e-07	2.17607e-06	ENSG00000163719.20_MTMR14	ENSG00000163719	MTMR14	down	YES	NO	-0.264897	0.068829	0.335578	0.0197146
926.442	0.75982	0.144631	5.25352	1.49219e-07	2.20923e-06	ENSG00000112159.12_MDN1	ENSG00000112159	MDN1	up	YES	NO	0.30749	0.0335032	-0.310592	0.0316684
153.41	1.19988	0.228389	5.25369	1.49085e-07	2.20923e-06	ENSG00000160214.13_RRP1	ENSG00000160214	RRP1	up	YES	NO	0.368287	0.0100084	-0.489136	0.000418866
234.431	2.92005	0.55581	5.25368	1.49093e-07	2.20923e-06	ENSG00000213886.4_UBD	ENSG00000213886	UBD	up	YES	NO	0.253574	0.0820253	-0.35819	0.012428
39.7434	1.69071	0.32196	5.2513	1.5103e-07	2.23191e-06	ENSG00000149485.19_FADS1	ENSG00000149485	FADS1	up	YES	NO	0.238785	0.102158	-0.288866	0.0464547
199.752	-1.19172	0.227044	-5.24886	1.53043e-07	2.25955e-06	ENSG00000111684.11_LPCAT3	ENSG00000111684	LPCAT3	down	YES	NO	-0.262827	0.0711065	0.44627	0.00147646
24.3858	-2.18452	0.416283	-5.24769	1.54021e-07	2.27189e-06	ENSG00000073734.10_ABCB11	ENSG00000073734	ABCB11	down	YES	NO	-0.419059	0.00303104	0.40311	0.00449948
85.0403	1.38034	0.263088	5.2467	1.54849e-07	2.28198e-06	ENSG00000167695.15_TLCD3A	ENSG00000167695	TLCD3A	up	YES	NO	0.198367	0.176511	-0.428423	0.00238216
20.5099	1.83952	0.350655	5.24595	1.55481e-07	2.28917e-06	ENSG00000184343.11_SRPK3	ENSG00000184343	SRPK3	up	YES	NO	0.197131	0.179277	-0.266323	0.0672945
294.242	-1.21996	0.232605	-5.24479	1.56462e-07	2.30148e-06	ENSG00000163293.12_NIPAL1	ENSG00000163293	NIPAL1	down	YES	NO	-0.489726	0.000411188	0.446956	0.0014488
351.232	-0.669498	0.127658	-5.24446	1.5674e-07	2.30345e-06	ENSG00000005812.11_FBXL3	ENSG00000005812	FBXL3	down	YES	NO	-0.445351	0.00151423	0.537628	8.12982e-05
26.7871	1.57119	0.299643	5.24355	1.57516e-07	2.3127e-06	ENSG00000167105.8_TMEM92	ENSG00000167105	TMEM92	up	YES	NO	0.187622	0.201604	-0.356404	0.0129043
19.4711	1.66176	0.316969	5.24266	1.58278e-07	2.32175e-06	ENSG00000204618.10_RNF39	ENSG00000204618	RNF39	up	YES	NO	0.131804	0.371858	-0.341128	0.0176555
87.2036	1.39839	0.266744	5.24244	1.58463e-07	2.32232e-06	ENSG00000059377.18_TBXAS1	ENSG00000059377	TBXAS1	up	YES	NO	0.251845	0.0842042	-0.328803	0.0225
1723.9	-1.28194	0.244549	-5.24206	1.5879e-07	2.32498e-06	ENSG00000215193.14_PEX26	ENSG00000215193	PEX26	down	YES	NO	-0.277398	0.0562807	0.371627	0.00930295
261.737	-1.70909	0.326156	-5.24009	1.60495e-07	2.34777e-06	ENSG00000157111.13_TMEM171	ENSG00000157111	TMEM171	down	YES	NO	-0.378125	0.00805274	0.434323	0.00203947
170.72	1.02924	0.196449	5.23924	1.61239e-07	2.35649e-06	ENSG00000156802.13_ATAD2	ENSG00000156802	ATAD2	up	YES	YES	0.290666	0.0450469	-0.35685	0.0127839
175.394	-0.967562	0.184754	-5.23704	1.63175e-07	2.3826e-06	ENSG00000102362.15_SYTL4	ENSG00000102362	SYTL4	down	YES	NO	-0.258589	0.0759557	0.41807	0.00310798
86.5243	0.665894	0.127161	5.23662	1.63541e-07	2.38574e-06	ENSG00000143374.17_TARS2	ENSG00000143374	TARS2	up	YES	NO	0.303713	0.0358546	-0.313172	0.0302063
161.74	-2.26244	0.432089	-5.23605	1.64047e-07	2.39093e-06	ENSG00000036672.16_USP2	ENSG00000036672	USP2	down	YES	NO	-0.356798	0.0127978	0.551886	4.77917e-05
388.605	0.685102	0.130857	5.2355	1.64542e-07	2.39595e-06	ENSG00000147133.17_TAF1	ENSG00000147133	TAF1	up	YES	YES	0.320641	0.0262875	-0.259714	0.0746432
123.654	1.24306	0.237451	5.23502	1.64967e-07	2.39995e-06	ENSG00000188070.9_C11orf95	ENSG00000188070	C11orf95	up	YES	NO	0.250258	0.0862445	-0.334489	0.0201416
376.949	0.645532	0.123357	5.23303	1.66755e-07	2.41978e-06	ENSG00000015676.18_NUDCD3	ENSG00000015676	NUDCD3	up	YES	NO	0.208149	0.155699	-0.374454	0.00873996
35.2436	-2.38009	0.454824	-5.23299	1.66787e-07	2.41978e-06	ENSG00000154165.5_GPR15	ENSG00000154165	GPR15	down	YES	NO	-0.193933	0.186578	0.534697	9.04128e-05
736.557	0.901618	0.172287	5.23323	1.66577e-07	2.41978e-06	ENSG00000198363.18_ASPH	ENSG00000198363	ASPH	up	YES	NO	0.248039	0.0891597	-0.283566	0.050806
141.748	1.06446	0.203467	5.23161	1.68038e-07	2.4357e-06	ENSG00000138772.13_ANXA3	ENSG00000138772	ANXA3	up	YES	NO	0.350202	0.0146816	-0.40702	0.00409124
461.582	-1.34893	0.25791	-5.23026	1.69272e-07	2.45137e-06	ENSG00000219481.10_NBPF1	ENSG00000219481	NBPF1	down	YES	NO	-0.347061	0.0156586	0.369789	0.00968571
104.516	1.1142	0.213201	5.22608	1.73141e-07	2.50511e-06	ENSG00000136856.18_SLC2A8	ENSG00000136856	SLC2A8	up	YES	NO	0.156188	0.289098	-0.279903	0.0540026
1403.22	-1.28191	0.245486	-5.22191	1.77089e-07	2.55726e-06	ENSG00000121900.19_TMEM54	ENSG00000121900	TMEM54	down	YES	NO	-0.434355	0.00203773	0.444229	0.00156151
19.8233	0.99726	0.19098	5.2218	1.77196e-07	2.55726e-06	ENSG00000137404.15_NRM	ENSG00000137404	NRM	up	YES	NO	0.182471	0.214486	-0.332694	0.0208627
40.1041	1.56684	0.30006	5.22176	1.77228e-07	2.55726e-06	ENSG00000235831.7_BHLHE40-AS1	ENSG00000235831	BHLHE40-AS1	up	YES	NO	0.454625	0.00116967	-0.442952	0.00161693
580.358	1.23517	0.236562	5.22135	1.77622e-07	2.5583e-06	ENSG00000139514.13_SLC7A1	ENSG00000139514	SLC7A1	up	YES	NO	0.254388	0.0810146	-0.290482	0.0451893
40.8286	-0.929985	0.178108	-5.22146	1.77514e-07	2.5583e-06	ENSG00000270959.1_LPP-AS2	ENSG00000270959	LPP-AS2	down	YES	NO	-0.363853	0.0110159	0.454654	0.00116872
580.952	-1.0058	0.192651	-5.22084	1.78111e-07	2.56303e-06	ENSG00000155846.17_PPARGC1B	ENSG00000155846	PPARGC1B	down	YES	NO	-0.225555	0.123209	0.316876	0.0282064
84.9189	0.920142	0.176255	5.22051	1.78431e-07	2.56531e-06	ENSG00000135632.12_SMYD5	ENSG00000135632	SMYD5	up	YES	NO	0.200393	0.172045	-0.363273	0.0111538
170.501	-1.20585	0.231025	-5.21959	1.79321e-07	2.57577e-06	ENSG00000114023.15_FAM162A	ENSG00000114023	FAM162A	down	YES	NO	-0.395126	0.0054452	0.507883	0.000228776
994.367	-1.07306	0.205713	-5.21629	1.82542e-07	2.61778e-06	ENSG00000086062.13_B4GALT1	ENSG00000086062	B4GALT1	down	YES	NO	-0.406934	0.00409986	0.426936	0.00247617
39.681	-1.69627	0.32519	-5.21626	1.82574e-07	2.61778e-06	ENSG00000164330.17_EBF1	ENSG00000164330	EBF1	down	YES	NO	-0.280226	0.0537143	0.355324	0.0131999
297.407	1.42289	0.272849	5.21493	1.8389e-07	2.63427e-06	ENSG00000124920.14_MYRF	ENSG00000124920	MYRF	up	YES	NO	0.238841	0.102075	-0.298868	0.039069
83.2937	0.629703	0.120759	5.21456	1.84258e-07	2.63716e-06	ENSG00000138002.16_IFT172	ENSG00000138002	IFT172	up	YES	NO	0.2745	0.0590112	-0.380942	0.00755758
256.192	-0.632015	0.121242	-5.21283	1.85983e-07	2.65946e-06	ENSG00000081019.13_RSBN1	ENSG00000081019	RSBN1	down	YES	NO	-0.306733	0.0339638	0.426619	0.00249663
19.7981	2.5642	0.492078	5.21097	1.87855e-07	2.68381e-06	ENSG00000183248.12_PRR36	ENSG00000183248	PRR36	up	YES	NO	0.30594	0.034452	-0.479346	0.000566732
424.518	0.91574	0.175773	5.20977	1.89071e-07	2.69876e-06	ENSG00000130816.17_DNMT1	ENSG00000130816	DNMT1	up	YES	YES	0.301361	0.0373867	-0.360531	0.0118264
15.398	2.17183	0.417133	5.20657	1.92361e-07	2.74326e-06	ENSG00000143847.15_PPFIA4	ENSG00000143847	PPFIA4	up	YES	NO	0.342939	0.0170244	-0.323695	0.0248121
638.366	-0.775902	0.149032	-5.20628	1.92664e-07	2.74512e-06	ENSG00000135940.7_COX5B	ENSG00000135940	COX5B	down	YES	NO	-0.574805	1.93039e-05	0.529655	0.000108303
31.4434	1.07324	0.206151	5.20607	1.92885e-07	2.7458e-06	ENSG00000170293.9_CMTM8	ENSG00000170293	CMTM8	up	YES	NO	0.334695	0.0200605	-0.270447	0.0630081
78.6059	1.56934	0.301472	5.20558	1.93394e-07	2.75059e-06	ENSG00000165655.17_ZNF503	ENSG00000165655	ZNF503	up	YES	NO	0.0943811	0.52342	-0.201518	0.169599
477.941	-1.71864	0.330256	-5.20395	1.95093e-07	2.77228e-06	ENSG00000162817.7_C1orf115	ENSG00000162817	C1orf115	down	YES	NO	-0.35151	0.0142905	0.433427	0.00208848
348.225	2.52747	0.485748	5.20326	1.95823e-07	2.78017e-06	ENSG00000041982.16_TNC	ENSG00000041982	TNC	up	YES	NO	0.237922	0.10344	-0.314279	0.0295969
3703.91	-1.90304	0.366137	-5.19762	2.01856e-07	2.86325e-06	ENSG00000166165.13_CKB	ENSG00000166165	CKB	down	YES	NO	-0.306936	0.0338398	0.300721	0.0378124
815.441	-0.964276	0.18559	-5.19574	2.03905e-07	2.88717e-06	ENSG00000117676.14_RPS6KA1	ENSG00000117676	RPS6KA1	down	YES	NO	-0.40965	0.00383537	0.415744	0.00329558
56.7007	0.938743	0.180673	5.19582	2.03822e-07	2.88717e-06	ENSG00000198208.12_RPS6KL1	ENSG00000198208	RPS6KL1	up	YES	NO	0.26732	0.0662379	-0.285143	0.0494779
32.2455	-1.13332	0.218216	-5.1936	2.06271e-07	2.91808e-06	ENSG00000157833.13_GAREM2	ENSG00000157833	GAREM2	down	YES	NO	-0.369225	0.00980577	0.236847	0.105055
14.9209	-2.06029	0.396832	-5.19184	2.08227e-07	2.94312e-06	ENSG00000007312.13_CD79B	ENSG00000007312	CD79B	down	YES	NO	-0.142152	0.335143	0.237814	0.103602
245.148	0.885221	0.170519	5.19133	2.08802e-07	2.94864e-06	ENSG00000110841.14_PPFIBP1	ENSG00000110841	PPFIBP1	up	YES	NO	0.449257	0.00135942	-0.365303	0.0106772
76.9509	0.634495	0.122248	5.19024	2.1002e-07	2.96321e-06	ENSG00000198707.17_CEP290	ENSG00000198707	CEP290	up	YES	NO	0.369737	0.00969666	-0.421659	0.00283685
632.404	1.18466	0.228263	5.18989	2.10415e-07	2.96352e-06	ENSG00000161996.19_WDR90	ENSG00000161996	WDR90	up	YES	NO	0.257645	0.0770704	-0.325274	0.0240771
70.8323	-1.01864	0.196272	-5.18997	2.10332e-07	2.96352e-06	ENSG00000163686.15_ABHD6	ENSG00000163686	ABHD6	down	YES	NO	-0.412148	0.00360539	0.490915	0.000396091
1559.62	-1.00306	0.193312	-5.18882	2.11632e-07	2.97802e-06	ENSG00000277443.3_MARCKS	ENSG00000277443	MARCKS	down	YES	NO	-0.295156	0.0416886	0.397634	0.00513099
124.106	-0.636593	0.122697	-5.18833	2.12192e-07	2.98326e-06	ENSG00000178694.10_NSUN3	ENSG00000178694	NSUN3	down	YES	NO	-0.29253	0.0436269	0.449591	0.00134685
25.6326	2.61129	0.503396	5.18735	2.13305e-07	2.99625e-06	ENSG00000245694.10_CRNDE	ENSG00000245694	CRNDE	up	YES	NO	0.234532	0.108599	-0.329581	0.0221642
33.4211	1.71697	0.331024	5.18683	2.13909e-07	3.00208e-06	ENSG00000092445.12_TYRO3	ENSG00000092445	TYRO3	up	YES	NO	0.324791	0.0243	-0.413545	0.00348206
20.1037	-1.63893	0.315995	-5.18657	2.14204e-07	3.00358e-06	ENSG00000205683.12_DPF3	ENSG00000205683	DPF3	down	YES	YES	-0.198929	0.175264	0.424269	0.00265304
606.658	0.720765	0.138992	5.18567	2.15236e-07	3.01539e-06	ENSG00000137693.14_YAP1	ENSG00000137693	YAP1	up	YES	NO	0.425482	0.00257127	-0.380756	0.00758949
113.223	0.76008	0.146619	5.18405	2.17121e-07	3.03912e-06	ENSG00000102030.16_NAA10	ENSG00000102030	NAA10	up	YES	NO	0.314609	0.0294171	-0.249762	0.0868889
363.556	-1.50223	0.28981	-5.18351	2.17751e-07	3.04525e-06	ENSG00000109265.15_CRACD	ENSG00000109265	CRACD	down	YES	NO	-0.321612	0.0258107	0.404124	0.00439035
847.239	-0.7232	0.139533	-5.18301	2.18335e-07	3.04806e-06	ENSG00000070610.14_GBA2	ENSG00000070610	GBA2	down	YES	NO	-0.280707	0.0532875	0.439095	0.00179507
2727.73	-0.913761	0.176295	-5.18315	2.18173e-07	3.04806e-06	ENSG00000110955.9_ATP5F1B	ENSG00000110955	ATP5F1B	down	YES	NO	-0.408483	0.00394716	0.512414	0.000196617
275.651	-0.530294	0.102399	-5.17869	2.23451e-07	3.11401e-06	ENSG00000013288.9_MAN2B2	ENSG00000013288	MAN2B2	down	YES	NO	-0.338065	0.0187683	0.340545	0.017863
613.401	-1.44251	0.278543	-5.17876	2.23365e-07	3.11401e-06	ENSG00000145703.16_IQGAP2	ENSG00000145703	IQGAP2	down	YES	NO	-0.430308	0.0022675	0.504221	0.000258175
7764.31	-0.85701	0.165518	-5.17774	2.24587e-07	3.12711e-06	ENSG00000167996.16_FTH1	ENSG00000167996	FTH1	down	YES	NO	-0.274314	0.0591905	0.273103	0.0603657
9677.19	-2.66667	0.515157	-5.17642	2.2618e-07	3.14288e-06	ENSG00000091138.13_SLC26A3	ENSG00000091138	SLC26A3	down	YES	NO	-0.391971	0.00586426	0.566742	2.67607e-05
690.485	0.913846	0.176544	5.17631	2.26313e-07	3.14288e-06	ENSG00000185650.10_ZFP36L1	ENSG00000185650	ZFP36L1	up	YES	NO	0.334757	0.0200361	-0.305179	0.0349262
309.208	0.942903	0.182155	5.17638	2.26237e-07	3.14288e-06	ENSG00000215440.12_NPEPL1	ENSG00000215440	NPEPL1	up	YES	NO	0.194589	0.185064	-0.457259	0.00108554
382.949	0.620554	0.119895	5.17581	2.26923e-07	3.1486e-06	ENSG00000137166.17_FOXP4	ENSG00000137166	FOXP4	up	YES	YES	0.354837	0.0133349	-0.347026	0.0156699
220.736	-1.40455	0.271384	-5.1755	2.27296e-07	3.15103e-06	ENSG00000154153.15_RETREG1	ENSG00000154153	RETREG1	down	YES	NO	-0.268499	0.0650044	0.460119	0.00100034
570.198	-0.920154	0.177892	-5.17254	2.30929e-07	3.19796e-06	ENSG00000095539.15_SEMA4G	ENSG00000095539	SEMA4G	down	YES	NO	-0.373231	0.00897983	0.448233	0.00139857
63.2025	2.25069	0.435133	5.17242	2.31083e-07	3.19796e-06	ENSG00000139211.7_AMIGO2	ENSG00000139211	AMIGO2	up	YES	NO	0.110008	0.456675	-0.355391	0.0131814
252.851	1.23011	0.237989	5.16877	2.35638e-07	3.25816e-06	ENSG00000160949.17_TONSL	ENSG00000160949	TONSL	up	YES	YES	0.329592	0.0221595	-0.370026	0.00963557
36.5882	1.86104	0.360188	5.16687	2.38051e-07	3.28866e-06	ENSG00000141682.12_PMAIP1	ENSG00000141682	PMAIP1	up	YES	NO	0.390101	0.00612555	-0.44034	0.00173573
369.581	-0.830255	0.160751	-5.16486	2.40615e-07	3.3212e-06	ENSG00000140374.16_ETFA	ENSG00000140374	ETFA	down	YES	NO	-0.356448	0.0128925	0.425844	0.00254726
159.932	0.696851	0.134947	5.16387	2.41894e-07	3.33595e-06	ENSG00000134905.17_CARS2	ENSG00000134905	CARS2	up	YES	NO	0.274077	0.0594186	-0.292036	0.0439997
50.1219	1.27653	0.24723	5.16331	2.42627e-07	3.34316e-06	ENSG00000136048.14_DRAM1	ENSG00000136048	DRAM1	up	YES	NO	0.20326	0.165863	-0.251422	0.0847447
1097.27	0.740565	0.143472	5.16175	2.44658e-07	3.36823e-06	ENSG00000130726.12_TRIM28	ENSG00000130726	TRIM28	up	YES	YES	0.159856	0.277779	-0.420888	0.00289324
69.8952	1.49318	0.289303	5.16131	2.45229e-07	3.37317e-06	ENSG00000114251.15_WNT5A	ENSG00000114251	WNT5A	up	YES	YES	0.0739003	0.61765	-0.312879	0.0303694
157.927	-1.35228	0.262023	-5.16092	2.45742e-07	3.3773e-06	ENSG00000088280.19_ASAP3	ENSG00000088280	ASAP3	down	YES	NO	-0.390513	0.00606714	0.50057	0.000290852
260.048	-0.763025	0.147865	-5.16028	2.46576e-07	3.38585e-06	ENSG00000117118.10_SDHB	ENSG00000117118	SDHB	down	YES	NO	-0.389507	0.00621067	0.550784	4.98378e-05
20.5738	1.35138	0.261984	5.15825	2.4927e-07	3.41988e-06	ENSG00000182324.7_KCNJ14	ENSG00000182324	KCNJ14	up	YES	NO	0.282226	0.0519574	-0.52466	0.000129154
255.686	-0.828553	0.160633	-5.15803	2.49555e-07	3.42084e-06	ENSG00000177628.16_GBA	ENSG00000177628	GBA	down	YES	NO	-0.241448	0.0982763	0.432655	0.00213159
78.4631	1.15263	0.223515	5.15684	2.51148e-07	3.43971e-06	ENSG00000104524.14_PYCR3	ENSG00000104524	PYCR3	up	YES	NO	0.18931	0.197504	-0.37894	0.00790663
128.036	0.68717	0.133296	5.15524	2.53309e-07	3.46632e-06	ENSG00000170448.12_NFXL1	ENSG00000170448	NFXL1	up	YES	NO	0.2545	0.0808769	-0.451858	0.0012643
182.356	1.56688	0.303981	5.15454	2.54254e-07	3.47626e-06	ENSG00000011426.11_ANLN	ENSG00000011426	ANLN	up	YES	NO	0.287417	0.0476132	-0.255641	0.0794794
521.654	-1.90236	0.369111	-5.15391	2.55107e-07	3.48492e-06	ENSG00000160191.18_PDE9A	ENSG00000160191	PDE9A	down	YES	NO	-0.399732	0.00488047	0.481386	0.00053252
25.584	1.25186	0.242966	5.15243	2.5713e-07	3.50955e-06	ENSG00000196284.17_SUPT3H	ENSG00000196284	SUPT3H	up	YES	YES	0.285675	0.0490368	-0.315744	0.0288057
201.971	-0.807801	0.156859	-5.14985	2.60691e-07	3.5551e-06	ENSG00000171492.14_LRRC8D	ENSG00000171492	LRRC8D	down	YES	NO	-0.307881	0.033267	0.393872	0.00560845
22.8849	0.872281	0.169409	5.14896	2.61928e-07	3.56585e-06	ENSG00000143256.5_PFDN2	ENSG00000143256	PFDN2	up	YES	NO	0.330552	0.021751	-0.363014	0.0112159
131.324	1.34636	0.261479	5.14901	2.61861e-07	3.56585e-06	ENSG00000274070.2_CASTOR2	ENSG00000274070	CASTOR2	up	YES	NO	0.239667	0.100859	-0.316044	0.0286459
1077.9	-0.656236	0.127516	-5.14629	2.65687e-07	3.61393e-06	ENSG00000164715.6_LMTK2	ENSG00000164715	LMTK2	down	YES	NO	-0.34826	0.0152795	0.345936	0.0160218
161.446	1.90991	0.371182	5.1455	2.66815e-07	3.62618e-06	ENSG00000196923.14_PDLIM7	ENSG00000196923	PDLIM7	up	YES	NO	0.309215	0.0324718	-0.355567	0.013133
108.092	-1.50829	0.293196	-5.14431	2.68499e-07	3.64595e-06	ENSG00000198121.14_LPAR1	ENSG00000198121	LPAR1	down	YES	NO	-0.330363	0.0218311	0.50948	0.000216934
372.826	1.23056	0.239228	5.14387	2.69131e-07	3.65141e-06	ENSG00000124207.17_CSE1L	ENSG00000124207	CSE1L	up	YES	NO	0.200416	0.171994	-0.301734	0.03714
194.609	0.713029	0.138623	5.14367	2.69422e-07	3.65224e-06	ENSG00000149657.20_LSM14B	ENSG00000149657	LSM14B	up	YES	NO	0.194604	0.185029	-0.425532	0.0025679
107	1.09534	0.212968	5.14321	2.70087e-07	3.65814e-06	ENSG00000137692.12_DCUN1D5	ENSG00000137692	DCUN1D5	up	YES	NO	0.315184	0.0291057	-0.460603	0.00098654
20.0317	-1.31893	0.256566	-5.14073	2.73679e-07	3.70049e-06	ENSG00000101680.15_LAMA1	ENSG00000101680	LAMA1	down	YES	NO	-0.290913	0.0448566	0.2826	0.051634
50.9238	0.797162	0.155067	5.14075	2.73638e-07	3.70049e-06	ENSG00000127399.15_LRRC61	ENSG00000127399	LRRC61	up	YES	NO	0.202929	0.166568	-0.462205	0.000942038
78.9695	0.875489	0.170395	5.13798	2.77704e-07	3.75172e-06	ENSG00000130731.16_METTL26	ENSG00000130731	METTL26	up	YES	NO	0.233882	0.10961	-0.495892	0.00033818
51.5402	-1.96911	0.383272	-5.13762	2.78234e-07	3.75569e-06	ENSG00000010319.7_SEMA3G	ENSG00000010319	SEMA3G	down	YES	NO	-0.213505	0.145095	0.431207	0.00221456
201.114	1.16642	0.227112	5.13586	2.80858e-07	3.7879e-06	ENSG00000135749.19_PCNX2	ENSG00000135749	PCNX2	up	YES	NO	0.416633	0.00322274	-0.44462	0.00154491
19.8791	-1.79383	0.349319	-5.13522	2.81818e-07	3.79762e-06	ENSG00000105251.11_SHD	ENSG00000105251	SHD	down	YES	NO	-0.382695	0.00726307	0.415375	0.00332628
2081.86	-1.53916	0.300041	-5.12983	2.89999e-07	3.90455e-06	ENSG00000120756.13_PLS1	ENSG00000120756	PLS1	down	YES	NO	-0.355037	0.0132793	0.465601	0.000853578
272.938	0.834477	0.162699	5.12898	2.91321e-07	3.91903e-06	ENSG00000107816.17_LZTS2	ENSG00000107816	LZTS2	up	YES	NO	0.309681	0.032198	-0.38686	0.00660274
106.38	2.12024	0.413492	5.12764	2.93392e-07	3.94025e-06	ENSG00000101255.12_TRIB3	ENSG00000101255	TRIB3	up	YES	NO	0.387935	0.00644106	-0.466501	0.000831415
1045.18	-0.841331	0.164078	-5.12764	2.93394e-07	3.94025e-06	ENSG00000165678.21_GHITM	ENSG00000165678	GHITM	down	YES	NO	-0.400644	0.0047749	0.518069	0.000162254
197.338	1.50537	0.293617	5.12697	2.94437e-07	3.95093e-06	ENSG00000103811.18_CTSH	ENSG00000103811	CTSH	up	YES	NO	0.191	0.193458	-0.340956	0.0177164
67.3594	2.02415	0.394851	5.12638	2.95373e-07	3.96014e-06	ENSG00000134824.14_FADS2	ENSG00000134824	FADS2	up	YES	NO	0.199347	0.174341	-0.219691	0.133526
127.51	0.732409	0.142893	5.12559	2.96602e-07	3.97327e-06	ENSG00000173113.7_TRMT112	ENSG00000173113	TRMT112	up	YES	YES	0.247662	0.0896632	-0.349761	0.0148155
41.687	1.63264	0.318612	5.12423	2.98754e-07	3.99873e-06	ENSG00000101000.6_PROCR	ENSG00000101000	PROCR	up	YES	NO	0.129579	0.380056	-0.240517	0.0996195
130.503	2.04671	0.399622	5.12161	3.02934e-07	4.04856e-06	ENSG00000017483.15_SLC38A5	ENSG00000017483	SLC38A5	up	YES	NO	0.157967	0.283572	-0.20936	0.153252
439.148	0.637496	0.124479	5.1213	3.03443e-07	4.04856e-06	ENSG00000186174.13_BCL9L	ENSG00000186174	BCL9L	up	YES	NO	0.487734	0.000437646	-0.429247	0.00233141
58.1876	-2.49058	0.486322	-5.12126	3.03495e-07	4.04856e-06	ENSG00000186417.14_GLDN	ENSG00000186417	GLDN	down	YES	NO	-0.25616	0.0788493	0.181884	0.21599
101.106	0.690737	0.134875	5.12133	3.03388e-07	4.04856e-06	ENSG00000196704.14_AMZ2	ENSG00000196704	AMZ2	up	YES	NO	0.297803	0.0398058	-0.359418	0.0121093
467.387	1.19455	0.233299	5.12024	3.05143e-07	4.06712e-06	ENSG00000159216.19_RUNX1	ENSG00000159216	RUNX1	up	YES	NO	0.429895	0.00229216	-0.367603	0.0101585
33.3101	1.41244	0.275896	5.11945	3.06422e-07	4.08075e-06	ENSG00000127585.12_FBXL16	ENSG00000127585	FBXL16	up	YES	NO	0.110702	0.453822	-0.303548	0.0359603
128.968	0.923254	0.180356	5.11906	3.07066e-07	4.08591e-06	ENSG00000177192.14_PUS1	ENSG00000177192	PUS1	up	YES	NO	0.436358	0.00193187	-0.346875	0.0157184
294.756	0.969354	0.189389	5.11833	3.08257e-07	4.09832e-06	ENSG00000123143.13_PKN1	ENSG00000123143	PKN1	up	YES	YES	0.362898	0.0112439	-0.483932	0.000492435
143.34	-1.21393	0.237206	-5.11761	3.09431e-07	4.11049e-06	ENSG00000167074.15_TEF	ENSG00000167074	TEF	down	YES	NO	-0.393367	0.00567551	0.398948	0.00497276
147.196	0.802282	0.156774	5.11744	3.09705e-07	4.1107e-06	ENSG00000114739.14_ACVR2B	ENSG00000114739	ACVR2B	up	YES	NO	0.281213	0.0528416	-0.307207	0.0336744
900.12	-2.05624	0.401895	-5.11636	3.11493e-07	4.13098e-06	ENSG00000156966.7_B3GNT7	ENSG00000156966	B3GNT7	down	YES	NO	-0.243018	0.0960418	0.333013	0.020733
65.0443	1.81657	0.355189	5.11438	3.14779e-07	4.17108e-06	ENSG00000277363.5_SRCIN1	ENSG00000277363	SRCIN1	up	YES	NO	0.247727	0.089577	-0.411372	0.00367547
1044.27	-0.812907	0.15896	-5.11392	3.15544e-07	4.17774e-06	ENSG00000127914.19_AKAP9	ENSG00000127914	AKAP9	down	YES	NO	-0.366524	0.010399	0.425646	0.00256039
175.003	-1.14878	0.224677	-5.11302	3.17054e-07	4.19424e-06	ENSG00000075239.14_ACAT1	ENSG00000075239	ACAT1	down	YES	NO	-0.399688	0.00488561	0.555295	4.19388e-05
14.0037	1.51119	0.295581	5.1126	3.17762e-07	4.20011e-06	ENSG00000276023.5_DUSP14	ENSG00000276023	DUSP14	up	YES	NO	0.229414	0.116757	-0.246187	0.0916522
36.558	0.847226	0.165752	5.11142	3.1974e-07	4.22274e-06	ENSG00000217930.8_PAM16	ENSG00000217930	PAM16	up	YES	NO	0.298765	0.0391397	-0.336481	0.0193664
143.051	0.585797	0.114621	5.11071	3.20953e-07	4.23524e-06	ENSG00000181915.5_ADO	ENSG00000181915	ADO	up	YES	NO	0.198582	0.176034	-0.415361	0.00332746
400.558	1.06562	0.208545	5.10978	3.22541e-07	4.25268e-06	ENSG00000126602.11_TRAP1	ENSG00000126602	TRAP1	up	YES	NO	0.278377	0.055381	-0.287738	0.0473538
16.6231	2.02554	0.396627	5.10692	3.2745e-07	4.31382e-06	ENSG00000099625.13_CBARP	ENSG00000099625	CBARP	up	YES	NO	0.408296	0.00396525	-0.313422	0.0300677
1098.08	-1.16736	0.228832	-5.1014	3.37154e-07	4.43798e-06	ENSG00000172115.9_CYCS	ENSG00000172115	CYCS	down	YES	NO	-0.374518	0.00872756	0.514545	0.000182962
2312.54	-1.27811	0.250561	-5.101	3.37862e-07	4.44362e-06	ENSG00000181885.18_CLDN7	ENSG00000181885	CLDN7	down	YES	NO	-0.428841	0.00235628	0.411926	0.00362526
97.9104	0.66987	0.131381	5.09866	3.42058e-07	4.49509e-06	ENSG00000105556.12_MIER2	ENSG00000105556	MIER2	up	YES	NO	0.400932	0.00474205	-0.39944	0.00491465
350.823	-1.05566	0.207066	-5.09819	3.42908e-07	4.50254e-06	ENSG00000100092.24_SH3BP1	ENSG00000100092	SH3BP1	down	YES	NO	-0.312976	0.0303158	0.444616	0.00154504
558.237	-1.58951	0.311826	-5.09745	3.44264e-07	4.51662e-06	ENSG00000101049.17_SGK2	ENSG00000101049	SGK2	down	YES	NO	-0.317007	0.0281374	0.368582	0.00994439
448.768	0.86929	0.17059	5.0958	3.47271e-07	4.55231e-06	ENSG00000103249.18_CLCN7	ENSG00000103249	CLCN7	up	YES	NO	0.37994	0.00773061	-0.42291	0.00274738
139.242	-1.85539	0.364167	-5.0949	3.48927e-07	4.57026e-06	ENSG00000211445.12_GPX3	ENSG00000211445	GPX3	down	YES	NO	-0.297432	0.0400659	0.423104	0.00273376
720.751	-1.583	0.31074	-5.09428	3.50067e-07	4.58124e-06	ENSG00000166920.13_C15orf48	ENSG00000166920	C15orf48	down	YES	NO	-0.470272	0.000744095	0.479555	0.000563135
82.63	-1.8088	0.355074	-5.09413	3.50342e-07	4.58124e-06	ENSG00000196196.3_HRCT1	ENSG00000196196	HRCT1	down	YES	NO	-0.279965	0.053947	0.357092	0.012719
769.358	-1.25108	0.245658	-5.09276	3.52879e-07	4.61063e-06	ENSG00000171992.13_SYNPO	ENSG00000171992	SYNPO	down	YES	NO	-0.282907	0.0513693	0.440365	0.00173458
228.043	-1.21224	0.238054	-5.0923	3.53738e-07	4.61427e-06	ENSG00000167107.13_ACSF2	ENSG00000167107	ACSF2	down	YES	NO	-0.385166	0.0068647	0.336717	0.0192766
29.2232	0.801381	0.157368	5.09242	3.53521e-07	4.61427e-06	ENSG00000173275.13_ZNF449	ENSG00000173275	ZNF449	up	YES	NO	0.179472	0.222245	-0.198191	0.176902
382.867	-0.696924	0.136906	-5.09053	3.57073e-07	4.65194e-06	ENSG00000137216.19_TMEM63B	ENSG00000137216	TMEM63B	down	YES	NO	-0.263422	0.070446	0.422408	0.002783
135.31	0.937489	0.184172	5.09028	3.57537e-07	4.65194e-06	ENSG00000153443.13_UBALD1	ENSG00000153443	UBALD1	up	YES	NO	0.325603	0.0239263	-0.466389	0.000834162
143.228	-0.593926	0.116675	-5.09044	3.57232e-07	4.65194e-06	ENSG00000170365.10_SMAD1	ENSG00000170365	SMAD1	down	YES	NO	-0.278787	0.0550078	0.456488	0.00110957
115.904	1.83748	0.360988	5.09014	3.57796e-07	4.65194e-06	ENSG00000184489.13_PTP4A3	ENSG00000184489	PTP4A3	up	YES	NO	0.312138	0.0307855	-0.44523	0.00151928
18.6201	0.972355	0.191063	5.08919	3.59591e-07	4.67145e-06	ENSG00000102312.24_PORCN	ENSG00000102312	PORCN	up	YES	NO	0.0940677	0.524807	-0.197397	0.178679
576.36	-0.803698	0.157931	-5.08892	3.60104e-07	4.6743e-06	ENSG00000101558.14_VAPA	ENSG00000101558	VAPA	down	YES	NO	-0.208477	0.155033	0.489326	0.000416381
16.8638	1.17005	0.229981	5.08761	3.62612e-07	4.70301e-06	ENSG00000124613.9_ZNF391	ENSG00000124613	ZNF391	up	YES	NO	0.217569	0.137414	-0.300584	0.0379043
53.0089	-1.64731	0.323914	-5.08563	3.66416e-07	4.74847e-06	ENSG00000152763.17_DNAI4	ENSG00000152763	DNAI4	down	YES	NO	-0.251028	0.0852503	0.485443	0.00046996
695.526	0.713097	0.140241	5.08481	3.67999e-07	4.76511e-06	ENSG00000179051.14_RCC2	ENSG00000179051	RCC2	up	YES	NO	0.364132	0.01095	-0.339665	0.0181799
44.049	1.14431	0.225063	5.08442	3.68757e-07	4.77104e-06	ENSG00000177674.16_AGTRAP	ENSG00000177674	AGTRAP	up	YES	NO	0.174093	0.236643	-0.309013	0.0325916
144.297	-1.11118	0.218563	-5.08404	3.69482e-07	4.77265e-06	ENSG00000011198.10_ABHD5	ENSG00000011198	ABHD5	down	YES	NO	-0.34068	0.0178149	0.406355	0.00415833
131.945	0.612899	0.12055	5.08417	3.69236e-07	4.77265e-06	ENSG00000132792.19_CTNNBL1	ENSG00000132792	CTNNBL1	up	YES	NO	0.281241	0.0528169	-0.419471	0.00299948
468.786	-0.991192	0.194974	-5.08371	3.70133e-07	4.77718e-06	ENSG00000168575.10_SLC20A2	ENSG00000168575	SLC20A2	down	YES	NO	-0.418082	0.00310702	0.363948	0.0109934
428.765	-1.24585	0.245083	-5.08338	3.70779e-07	4.78163e-06	ENSG00000188761.13_BCL2L15	ENSG00000188761	BCL2L15	down	YES	NO	-0.234164	0.109171	0.377357	0.00819243
196.644	0.910479	0.179128	5.08284	3.71829e-07	4.79129e-06	ENSG00000111300.10_NAA25	ENSG00000111300	NAA25	up	YES	NO	0.279535	0.0543326	-0.343735	0.0167531
1604.74	0.757524	0.149082	5.08125	3.74966e-07	4.8278e-06	ENSG00000196498.13_NCOR2	ENSG00000196498	NCOR2	up	YES	YES	0.404444	0.0043564	-0.49549	0.000342553
483.582	-1.32813	0.261441	-5.08004	3.77349e-07	4.85455e-06	ENSG00000135362.14_PRR5L	ENSG00000135362	PRR5L	down	YES	NO	-0.303952	0.0357021	0.446525	0.00146612
190.619	0.854985	0.168311	5.07979	3.77848e-07	4.85704e-06	ENSG00000114993.17_RTKN	ENSG00000114993	RTKN	up	YES	NO	0.384155	0.00702533	-0.310511	0.0317152
442.814	0.85462	0.16831	5.07764	3.82146e-07	4.90436e-06	ENSG00000159840.16_ZYX	ENSG00000159840	ZYX	up	YES	NO	0.326322	0.0235996	-0.317138	0.0280691
268.64	-0.861189	0.169603	-5.07768	3.82065e-07	4.90436e-06	ENSG00000183826.18_BTBD9	ENSG00000183826	BTBD9	down	YES	NO	-0.114051	0.440196	0.407372	0.00405622
1103.47	0.511797	0.100822	5.07626	3.84936e-07	4.93618e-06	ENSG00000204469.13_PRRC2A	ENSG00000204469	PRRC2A	up	YES	NO	0.292385	0.0437361	-0.402874	0.00452521
289.722	0.789933	0.155651	5.07502	3.87455e-07	4.96449e-06	ENSG00000171490.13_RSL1D1	ENSG00000171490	RSL1D1	up	YES	NO	0.324877	0.0242605	-0.384226	0.00701391
190.212	-0.757445	0.149314	-5.07284	3.91931e-07	5.01779e-06	ENSG00000204308.8_RNF5	ENSG00000204308	RNF5	down	YES	NO	-0.448321	0.00139517	0.409709	0.00382975
563.131	0.845158	0.166619	5.07241	3.92806e-07	5.02494e-06	ENSG00000166508.18_MCM7	ENSG00000166508	MCM7	up	YES	NO	0.262198	0.0718098	-0.324374	0.0244939
191.898	1.4669	0.289207	5.07215	3.93337e-07	5.02769e-06	ENSG00000183010.17_PYCR1	ENSG00000183010	PYCR1	up	YES	NO	0.301179	0.0375071	-0.370135	0.00961265
84.2576	0.963702	0.190055	5.07064	3.9649e-07	5.06392e-06	ENSG00000187840.5_EIF4EBP1	ENSG00000187840	EIF4EBP1	up	YES	NO	0.335525	0.0197353	-0.361803	0.0115103
19.5184	1.85013	0.365057	5.06805	4.01916e-07	5.12911e-06	ENSG00000287569.1_RP4-760C5.1	ENSG00000287569	RP4-760C5	up	YES	NO	0.237847	0.103552	-0.167972	0.253786
101.268	-0.701172	0.138405	-5.0661	4.06048e-07	5.17769e-06	ENSG00000157379.14_DHRS1	ENSG00000157379	DHRS1	down	YES	NO	-0.249506	0.0872239	0.426609	0.00249726
43.3646	-0.850993	0.168004	-5.06531	4.07737e-07	5.19184e-06	ENSG00000099330.9_OCEL1	ENSG00000099330	OCEL1	down	YES	NO	-0.370109	0.00961813	0.397784	0.00511277
508.604	-0.981507	0.193772	-5.06527	4.07811e-07	5.19184e-06	ENSG00000117528.14_ABCD3	ENSG00000117528	ABCD3	down	YES	NO	-0.486793	0.000450668	0.504595	0.000255018
483.601	0.581078	0.11481	5.0612	4.16621e-07	5.29976e-06	ENSG00000173473.11_SMARCC1	ENSG00000173473	SMARCC1	up	YES	YES	0.245483	0.0926141	-0.293397	0.0429788
422.998	-0.717267	0.141725	-5.06099	4.17087e-07	5.30143e-06	ENSG00000100485.12_SOS2	ENSG00000100485	SOS2	down	YES	NO	-0.294681	0.042034	0.381089	0.00753249
323.065	0.606386	0.119821	5.06075	4.17614e-07	5.3039e-06	ENSG00000141568.21_FOXK2	ENSG00000141568	FOXK2	up	YES	NO	0.31275	0.0304417	-0.439186	0.00179067
3218.65	-2.35935	0.46624	-5.06039	4.1841e-07	5.30977e-06	ENSG00000104267.10_CA2	ENSG00000104267	CA2	down	YES	NO	-0.387371	0.00652538	0.5548	4.27453e-05
136.839	1.036	0.204867	5.05694	4.26037e-07	5.40224e-06	ENSG00000135763.10_URB2	ENSG00000135763	URB2	up	YES	NO	0.308569	0.0328549	-0.314576	0.0294351
730.941	-0.604611	0.119617	-5.05456	4.31382e-07	5.46566e-06	ENSG00000174903.16_RAB1B	ENSG00000174903	RAB1B	down	YES	NO	-0.426317	0.00251622	0.409452	0.00385409
15.4429	1.59738	0.316053	5.05417	4.32268e-07	5.47253e-06	ENSG00000204113.6_BMP2KL	ENSG00000204113	BMP2KL	up	YES	NO	0.217574	0.137406	-0.30938	0.0323751
113.427	1.95243	0.386398	5.05291	4.35136e-07	5.50446e-06	ENSG00000120068.7_HOXB8	ENSG00000120068	HOXB8	up	YES	NO	0.384835	0.00691692	-0.31718	0.0280469
113.686	1.05341	0.208514	5.05199	4.37238e-07	5.52664e-06	ENSG00000181026.15_AEN	ENSG00000181026	AEN	up	YES	NO	0.27036	0.0630962	-0.355801	0.0130685
648.959	-1.92051	0.3802	-5.05132	4.38758e-07	5.54145e-06	ENSG00000147883.12_CDKN2B	ENSG00000147883	CDKN2B	down	YES	NO	-0.329641	0.0221384	0.448994	0.00136936
12.549	-1.99928	0.395874	-5.05029	4.41132e-07	5.56639e-06	ENSG00000047936.11_ROS1	ENSG00000047936	ROS1	down	YES	NO	-0.354074	0.0135492	0.494564	0.000352835
132.966	0.729676	0.144486	5.05016	4.41433e-07	5.56639e-06	ENSG00000221926.13_TRIM16	ENSG00000221926	TRIM16	up	YES	YES	0.188997	0.19826	-0.358936	0.0122336
20.9761	2.14379	0.424529	5.04981	4.42261e-07	5.57241e-06	ENSG00000146411.6_SLC2A12	ENSG00000146411	SLC2A12	up	YES	NO	0.0939003	0.525548	-0.186816	0.203583
34.0996	-1.50239	0.297623	-5.04798	4.46511e-07	5.62151e-06	ENSG00000151632.17_AKR1C2	ENSG00000151632	AKR1C2	down	YES	NO	-0.343976	0.0166717	0.403	0.00451152
1147.47	-1.27041	0.251895	-5.04341	4.57306e-07	5.75287e-06	ENSG00000166866.13_MYO1A	ENSG00000166866	MYO1A	down	YES	NO	-0.357546	0.0125978	0.44304	0.00161306
165.656	-1.37682	0.27305	-5.04238	4.59782e-07	5.77944e-06	ENSG00000167705.12_RILP	ENSG00000167705	RILP	down	YES	NO	-0.297088	0.0403078	0.412348	0.0035875
654.49	-1.05574	0.209401	-5.04174	4.61312e-07	5.7929e-06	ENSG00000113161.17_HMGCR	ENSG00000113161	HMGCR	down	YES	NO	-0.272823	0.0606399	0.479559	0.000563057
740.495	-1.29178	0.256276	-5.04058	4.64112e-07	5.82007e-06	ENSG00000139567.13_ACVRL1	ENSG00000139567	ACVRL1	down	YES	NO	-0.341706	0.017452	0.405722	0.00422301
13.8493	1.14472	0.227115	5.04028	4.64861e-07	5.82486e-06	ENSG00000286207.1_RP11-17G11.2	ENSG00000286207	RP11-17G11	up	YES	NO	0.252395	0.083506	-0.300861	0.0377191
20.7512	1.32497	0.262967	5.03856	4.69053e-07	5.86931e-06	ENSG00000103269.14_RHBDL1	ENSG00000103269	RHBDL1	up	YES	NO	0.299761	0.038459	-0.231588	0.113236
365.683	-0.763152	0.151463	-5.03852	4.69146e-07	5.86931e-06	ENSG00000176542.10_USF3	ENSG00000176542	USF3	down	YES	NO	-0.221858	0.129642	0.486161	0.000459612
410.997	-0.827888	0.164318	-5.03832	4.6963e-07	5.87075e-06	ENSG00000166411.14_IDH3A	ENSG00000166411	IDH3A	down	YES	NO	-0.327234	0.0231904	0.47116	0.000724757
487.921	-1.45964	0.289733	-5.03789	4.70696e-07	5.87944e-06	ENSG00000164237.9_CMBL	ENSG00000164237	CMBL	down	YES	NO	-0.435054	0.00200022	0.511046	0.000205866
781.594	1.34244	0.266492	5.03743	4.71814e-07	5.88879e-06	ENSG00000072110.16_ACTN1	ENSG00000072110	ACTN1	up	YES	NO	0.356043	0.0130026	-0.265847	0.0678033
474.609	1.27568	0.253269	5.03686	4.73243e-07	5.90198e-06	ENSG00000183856.11_IQGAP3	ENSG00000183856	IQGAP3	up	YES	NO	0.384802	0.00692209	-0.332163	0.02108
212.862	-1.36207	0.270465	-5.03603	4.75298e-07	5.92297e-06	ENSG00000164099.3_PRSS12	ENSG00000164099	PRSS12	down	YES	NO	-0.245396	0.0927334	0.425792	0.00255068
187.364	1.83199	0.363885	5.03454	4.79007e-07	5.96452e-06	ENSG00000101825.8_MXRA5	ENSG00000101825	MXRA5	up	YES	NO	0.0715687	0.628817	-0.222759	0.12805
226.185	-1.97298	0.392006	-5.03303	4.82781e-07	6.00681e-06	ENSG00000113303.12_BTNL8	ENSG00000113303	BTNL8	down	YES	NO	-0.364094	0.0109589	0.444407	0.00155391
111.163	1.17462	0.233417	5.03231	4.84615e-07	6.02021e-06	ENSG00000130881.14_LRP3	ENSG00000130881	LRP3	up	YES	NO	0.218107	0.13642	-0.345502	0.0161637
195.07	-0.846224	0.168155	-5.0324	4.84384e-07	6.02021e-06	ENSG00000178802.18_MPI	ENSG00000178802	MPI	down	YES	NO	-0.483395	0.000500656	0.385936	0.00674444
145.706	-1.53449	0.304942	-5.03207	4.85222e-07	6.02304e-06	ENSG00000102886.15_GDPD3	ENSG00000102886	GDPD3	down	YES	NO	-0.344076	0.0166378	0.443757	0.00158182
49.5883	-1.24517	0.247531	-5.03035	4.89588e-07	6.0725e-06	ENSG00000164296.7_TIGD6	ENSG00000164296	TIGD6	down	YES	NO	-0.359943	0.0119751	0.423868	0.00268055
22.3873	1.41551	0.281608	5.02654	4.99419e-07	6.18961e-06	ENSG00000136982.6_DSCC1	ENSG00000136982	DSCC1	up	YES	NO	0.269776	0.0636905	-0.243999	0.0946657
71.301	-2.33806	0.46524	-5.0255	5.02119e-07	6.21822e-06	ENSG00000115380.20_EFEMP1	ENSG00000115380	EFEMP1	down	YES	NO	-0.304029	0.0356526	0.409955	0.00380659
77.8888	0.761344	0.151519	5.02473	5.04139e-07	6.22869e-06	ENSG00000164086.10_DUSP7	ENSG00000164086	DUSP7	up	YES	NO	0.28985	0.0456807	-0.430211	0.00227327
209.105	-0.743795	0.148021	-5.02493	5.03624e-07	6.22869e-06	ENSG00000188786.10_MTF1	ENSG00000188786	MTF1	down	YES	NO	-0.304072	0.0356254	0.421477	0.00285007
310.871	0.778181	0.154878	5.02447	5.0483e-07	6.23237e-06	ENSG00000126457.22_PRMT1	ENSG00000126457	PRMT1	up	YES	YES	0.284531	0.0499899	-0.34672	0.0157682
68.2176	1.48352	0.295284	5.02404	5.05966e-07	6.24156e-06	ENSG00000065923.10_SLC9A7	ENSG00000065923	SLC9A7	up	YES	NO	0.336218	0.0194674	-0.474282	0.000660345
36.166	1.21895	0.24264	5.0237	5.06842e-07	6.24751e-06	ENSG00000181191.12_PJA1	ENSG00000181191	PJA1	up	YES	NO	0.353078	0.0138331	-0.389868	0.00615887
47.7728	-0.836743	0.166576	-5.02318	5.08224e-07	6.25969e-06	ENSG00000100577.19_GSTZ1	ENSG00000100577	GSTZ1	down	YES	NO	-0.351515	0.0142889	0.354575	0.0134083
61.6362	0.72285	0.143918	5.02264	5.09659e-07	6.27251e-06	ENSG00000171425.10_ZNF581	ENSG00000171425	ZNF581	up	YES	NO	0.221241	0.130738	-0.470087	0.00074818
316.688	-2.02559	0.403571	-5.01917	5.18946e-07	6.3778e-06	ENSG00000086696.11_HSD17B2	ENSG00000086696	HSD17B2	down	YES	NO	-0.373516	0.00892346	0.446148	0.00148144
47.2458	0.977057	0.194666	5.01915	5.19016e-07	6.3778e-06	ENSG00000110844.14_PRPF40B	ENSG00000110844	PRPF40B	up	YES	NO	0.225437	0.123412	-0.312042	0.0308395
144.036	-0.705091	0.140485	-5.01899	5.19445e-07	6.37814e-06	ENSG00000135953.11_MFSD9	ENSG00000135953	MFSD9	down	YES	NO	-0.435265	0.00198899	0.358776	0.012275
148.237	0.626041	0.124751	5.01831	5.21286e-07	6.39581e-06	ENSG00000275700.6_AATF	ENSG00000275700	AATF	up	YES	NO	0.450559	0.00131103	-0.39059	0.00605635
365.309	-0.657284	0.130986	-5.01798	5.22178e-07	6.39688e-06	ENSG00000167323.12_STIM1	ENSG00000167323	STIM1	down	YES	NO	-0.312289	0.0307002	0.401516	0.00467586
140.498	1.87593	0.373834	5.01806	5.21947e-07	6.39688e-06	ENSG00000254290.1_RP11-150O12.3	ENSG00000254290	RP11-150O12	up	YES	NO	0.199433	0.174151	-0.270476	0.0629791
297.847	1.36819	0.272677	5.01761	5.23188e-07	6.40432e-06	ENSG00000160957.14_RECQL4	ENSG00000160957	RECQL4	up	YES	NO	0.280691	0.0533016	-0.291895	0.0441069
140.758	0.699377	0.139402	5.01696	5.24948e-07	6.41599e-06	ENSG00000102595.20_UGGT2	ENSG00000102595	UGGT2	up	YES	NO	0.175555	0.232668	-0.320672	0.0262722
420.148	-0.981452	0.195626	-5.01698	5.24906e-07	6.41599e-06	ENSG00000110628.16_SLC22A18	ENSG00000110628	SLC22A18	down	YES	NO	-0.368677	0.00992372	0.436104	0.00194501
255.603	0.501471	0.0999984	5.01479	5.30919e-07	6.48185e-06	ENSG00000136861.18_CDK5RAP2	ENSG00000136861	CDK5RAP2	up	YES	NO	0.375537	0.00853205	-0.380009	0.0077185
630.273	-1.20244	0.239783	-5.0147	5.31152e-07	6.48185e-06	ENSG00000151150.22_ANK3	ENSG00000151150	ANK3	down	YES	NO	-0.33389	0.0203801	0.402731	0.00454093
2110	-1.85786	0.370552	-5.01376	5.33752e-07	6.50858e-06	ENSG00000173597.9_SULT1B1	ENSG00000173597	SULT1B1	down	YES	NO	-0.387764	0.00646649	0.530918	0.000103544
42.6687	-2.44328	0.487398	-5.0129	5.3615e-07	6.52781e-06	ENSG00000205038.12_PKHD1L1	ENSG00000205038	PKHD1L1	down	YES	NO	-0.2097	0.15257	0.434518	0.0020289
855.483	-1.97563	0.394105	-5.01295	5.36011e-07	6.52781e-06	ENSG00000233041.8_PHGR1	ENSG00000233041	PHGR1	down	YES	NO	-0.404623	0.0043375	0.493432	0.000365772
286.36	-1.68175	0.335583	-5.01144	5.40252e-07	6.57272e-06	ENSG00000137872.17_SEMA6D	ENSG00000137872	SEMA6D	down	YES	NO	-0.382809	0.00724411	0.540655	7.27732e-05
326.958	-0.673723	0.134541	-5.00756	5.5124e-07	6.70128e-06	ENSG00000167461.12_RAB8A	ENSG00000167461	RAB8A	down	YES	NO	-0.2882	0.0469838	0.332957	0.0207558
78.1937	-2.1067	0.420727	-5.00729	5.52008e-07	6.70548e-06	ENSG00000168060.16_NAALADL1	ENSG00000168060	NAALADL1	down	YES	NO	-0.25883	0.0756731	0.325228	0.0240982
84.948	0.811253	0.162024	5.00701	5.5283e-07	6.71034e-06	ENSG00000133315.12_MACROD1	ENSG00000133315	MACROD1	up	YES	NO	0.0327727	0.824991	-0.416663	0.00322027
211.994	0.522508	0.104369	5.00637	5.54655e-07	6.72736e-06	ENSG00000105176.18_URI1	ENSG00000105176	URI1	up	YES	NO	0.0808552	0.584853	-0.305834	0.0345177
16.2671	2.72786	0.544911	5.00606	5.55545e-07	6.73302e-06	ENSG00000133048.13_CHI3L1	ENSG00000133048	CHI3L1	up	YES	NO	0.323068	0.0251092	-0.522164	0.000140886
128.203	0.540622	0.108016	5.00502	5.58556e-07	6.76436e-06	ENSG00000120725.13_SIL1	ENSG00000120725	SIL1	up	YES	NO	0.312628	0.03051	-0.380463	0.00763985
796.113	-0.588147	0.117516	-5.00485	5.59069e-07	6.76542e-06	ENSG00000159592.11_GPBP1L1	ENSG00000159592	GPBP1L1	down	YES	NO	-0.288762	0.0465366	0.384358	0.00699283
1495.26	-2.26343	0.452353	-5.00368	5.62474e-07	6.80145e-06	ENSG00000163586.10_FABP1	ENSG00000163586	FABP1	down	YES	NO	-0.351793	0.014207	0.498067	0.000315378
174.399	0.580104	0.115946	5.00322	5.63796e-07	6.81224e-06	ENSG00000181220.17_ZNF746	ENSG00000181220	ZNF746	up	YES	NO	0.259004	0.0754693	-0.601912	6.02781e-06
90.7088	1.81154	0.362092	5.00298	5.64509e-07	6.81569e-06	ENSG00000163618.18_CADPS	ENSG00000163618	CADPS	up	YES	NO	0.242698	0.0964945	-0.355033	0.0132805
65.7587	0.729309	0.145897	4.99878	5.76944e-07	6.96054e-06	ENSG00000103042.9_SLC38A7	ENSG00000103042	SLC38A7	up	YES	NO	0.189457	0.197149	-0.414554	0.00339543
117.485	0.882012	0.176484	4.9977	5.80193e-07	6.98913e-06	ENSG00000141076.18_UTP4	ENSG00000141076	UTP4	up	YES	NO	0.318146	0.0275465	-0.269928	0.0635357
280.82	-1.21273	0.242653	-4.99779	5.79919e-07	6.98913e-06	ENSG00000183508.5_TENT5C	ENSG00000183508	TENT5C	down	YES	NO	-0.223348	0.12702	0.400535	0.00478745
161.508	1.13183	0.226554	4.99586	5.85745e-07	7.05067e-06	ENSG00000167747.15_C19orf48	ENSG00000167747	C19orf48	up	YES	NO	0.187372	0.202217	-0.327178	0.0232151
124.755	1.27337	0.255024	4.99313	5.94078e-07	7.14557e-06	ENSG00000069424.15_KCNAB2	ENSG00000069424	KCNAB2	up	YES	NO	0.39271	0.00576368	-0.30837	0.0329735
359.207	-0.626444	0.125484	-4.99222	5.96881e-07	7.17385e-06	ENSG00000100075.10_SLC25A1	ENSG00000100075	SLC25A1	down	YES	NO	-0.371889	0.00924949	0.389656	0.00618934
154.287	-1.31899	0.264243	-4.99157	5.98906e-07	7.19275e-06	ENSG00000197594.14_ENPP1	ENSG00000197594	ENPP1	down	YES	NO	-0.283596	0.050781	0.368643	0.00993122
29.7617	-1.32287	0.26505	-4.99102	6.00609e-07	7.20777e-06	ENSG00000171291.9_ZNF439	ENSG00000171291	ZNF439	down	YES	NO	-0.331004	0.021561	0.446811	0.00145462
68.3207	0.892271	0.178805	4.99018	6.03225e-07	7.23369e-06	ENSG00000131788.16_PIAS3	ENSG00000131788	PIAS3	up	YES	NO	0.300354	0.0380586	-0.276187	0.0574087
19.9522	1.68399	0.337487	4.9898	6.04423e-07	7.24261e-06	ENSG00000144395.18_CCDC150	ENSG00000144395	CCDC150	up	YES	NO	0.42861	0.00237051	-0.329712	0.0221082
390.626	-1.4549	0.29163	-4.98884	6.07415e-07	7.27297e-06	ENSG00000160712.13_IL6R	ENSG00000160712	IL6R	down	YES	NO	-0.265707	0.0679535	0.409858	0.0038157
552.681	-1.05514	0.211506	-4.98867	6.07948e-07	7.27388e-06	ENSG00000103056.12_SMPD3	ENSG00000103056	SMPD3	down	YES	NO	-0.302341	0.036742	0.36988	0.00966647
779.043	0.522344	0.104739	4.98712	6.12873e-07	7.32729e-06	ENSG00000183495.14_EP400	ENSG00000183495	EP400	up	YES	YES	0.50242	0.000273856	-0.375619	0.00851646
537.793	0.886854	0.177875	4.98581	6.17025e-07	7.37139e-06	ENSG00000141556.22_TBCD	ENSG00000141556	TBCD	up	YES	NO	0.397333	0.00516783	-0.292416	0.0437126
240.502	-0.818751	0.164258	-4.98453	6.21114e-07	7.41466e-06	ENSG00000147471.12_PLPBP	ENSG00000147471	PLPBP	down	YES	NO	-0.354433	0.0134481	0.467034	0.000818542
40.703	1.92123	0.385489	4.98387	6.2325e-07	7.43458e-06	ENSG00000158859.10_ADAMTS4	ENSG00000158859	ADAMTS4	up	YES	NO	0.568158	2.52849e-05	-0.313109	0.0302416
195.203	1.69164	0.339642	4.98066	6.33667e-07	7.54752e-06	ENSG00000144668.12_ITGA9	ENSG00000144668	ITGA9	up	YES	NO	0.291527	0.0443868	-0.352695	0.0139436
100.886	0.737069	0.147985	4.98071	6.33516e-07	7.54752e-06	ENSG00000147996.17_CBWD5	ENSG00000147996	CBWD5	up	YES	NO	0.422292	0.00279125	-0.427626	0.00243215
1386.38	-0.54945	0.110323	-4.98039	6.34575e-07	7.55268e-06	ENSG00000082641.16_NFE2L1	ENSG00000082641	NFE2L1	down	YES	NO	-0.308849	0.0326885	0.387547	0.00649895
100.224	1.63406	0.328264	4.97787	6.42869e-07	7.63995e-06	ENSG00000006327.14_TNFRSF12A	ENSG00000006327	TNFRSF12A	up	YES	NO	0.342521	0.0171685	-0.452536	0.00124051
33.4049	1.07622	0.216211	4.97765	6.43602e-07	7.64295e-06	ENSG00000170191.5_NANP	ENSG00000170191	NANP	up	YES	NO	0.141556	0.337196	-0.262707	0.0712408
935.058	-0.87718	0.176264	-4.97652	6.47371e-07	7.67237e-06	ENSG00000101596.16_SMCHD1	ENSG00000101596	SMCHD1	down	YES	NO	-0.240352	0.0998595	0.320789	0.0262144
82.6422	0.619659	0.124513	4.97665	6.46936e-07	7.67237e-06	ENSG00000119401.11_TRIM32	ENSG00000119401	TRIM32	up	YES	NO	0.175393	0.233106	-0.39857	0.00501793
60.8921	-2.07348	0.416657	-4.97647	6.47527e-07	7.67237e-06	ENSG00000168309.18_FAM107A	ENSG00000168309	FAM107A	down	YES	NO	-0.244098	0.094528	0.386151	0.00671134
96.1619	0.65963	0.132566	4.97586	6.49574e-07	7.6909e-06	ENSG00000106246.18_PTCD1	ENSG00000106246	PTCD1	up	YES	NO	0.159933	0.277547	-0.27978	0.0541127
100.944	1.33413	0.268136	4.97556	6.50577e-07	7.69704e-06	ENSG00000196950.14_SLC39A10	ENSG00000196950	SLC39A10	up	YES	NO	0.275624	0.0579397	-0.261767	0.072295
224.946	-0.623713	0.125379	-4.97462	6.53773e-07	7.72911e-06	ENSG00000125734.15_GPR108	ENSG00000125734	GPR108	down	YES	NO	-0.277961	0.0557617	0.49882	0.000307808
78.5189	2.53735	0.510128	4.97396	6.56003e-07	7.7497e-06	ENSG00000170835.17_CEL	ENSG00000170835	CEL	up	YES	NO	0.237164	0.104576	-0.310728	0.03159
410.054	-0.6799	0.136801	-4.97	6.69522e-07	7.90354e-06	ENSG00000117143.13_UAP1	ENSG00000117143	UAP1	down	YES	NO	-0.329514	0.0221929	0.370852	0.00946284
1277.54	-0.613268	0.123426	-4.96873	6.73922e-07	7.94666e-06	ENSG00000122359.18_ANXA11	ENSG00000122359	ANXA11	down	YES	NO	-0.365417	0.0106509	0.376727	0.00830859
67.3964	1.04567	0.210453	4.96866	6.74174e-07	7.94666e-06	ENSG00000142684.9_ZNF593	ENSG00000142684	ZNF593	up	YES	NO	0.263948	0.0698661	-0.323156	0.0250676
97.8136	-1.7162	0.345427	-4.96833	6.75315e-07	7.95421e-06	ENSG00000178462.12_TUBAL3	ENSG00000178462	TUBAL3	down	YES	NO	-0.352387	0.0140332	0.453336	0.00121295
18.9041	-3.04776	0.613517	-4.96769	6.77537e-07	7.97448e-06	ENSG00000164530.15_PI16	ENSG00000164530	PI16	down	YES	NO	-0.364466	0.0108714	0.505145	0.000250449
186.842	0.695162	0.13996	4.96685	6.80493e-07	8.00334e-06	ENSG00000105447.13_GRWD1	ENSG00000105447	GRWD1	up	YES	NO	0.287517	0.0475319	-0.412485	0.00357523
1199.03	-1.74086	0.350526	-4.96642	6.8201e-07	8.01526e-06	ENSG00000099139.14_PCSK5	ENSG00000099139	PCSK5	down	YES	NO	-0.242139	0.0972876	0.408897	0.00390714
523.776	-0.790263	0.159129	-4.96617	6.8288e-07	8.01878e-06	ENSG00000103966.11_EHD4	ENSG00000103966	EHD4	down	YES	NO	-0.387278	0.00653946	0.383111	0.00719454
146.41	3.15511	0.635337	4.96605	6.83319e-07	8.01878e-06	ENSG00000131203.13_IDO1	ENSG00000131203	IDO1	up	YES	NO	0.16697	0.256671	-0.187666	0.201496
230.618	1.28768	0.25931	4.96578	6.84272e-07	8.02405e-06	ENSG00000122034.17_GTF3A	ENSG00000122034	GTF3A	up	YES	NO	0.326282	0.0236176	-0.439307	0.00178485
170.691	0.986494	0.198726	4.96409	6.90222e-07	8.08786e-06	ENSG00000033170.17_FUT8	ENSG00000033170	FUT8	up	YES	NO	0.320528	0.0263433	-0.324093	0.0246254
47.879	1.52521	0.307264	4.96383	6.91168e-07	8.09053e-06	ENSG00000140511.12_HAPLN3	ENSG00000140511	HAPLN3	up	YES	NO	0.358756	0.0122802	-0.313348	0.0301087
695.322	-1.31114	0.264143	-4.96374	6.91468e-07	8.09053e-06	ENSG00000164251.5_F2RL1	ENSG00000164251	F2RL1	down	YES	NO	-0.471448	0.000718601	0.422606	0.00276893
15.8893	1.25941	0.253742	4.96334	6.92905e-07	8.10139e-06	ENSG00000154920.15_EME1	ENSG00000154920	EME1	up	YES	NO	0.438355	0.00183117	-0.33234	0.0210074
177.538	0.874596	0.176235	4.96267	6.95319e-07	8.12363e-06	ENSG00000167721.11_TSR1	ENSG00000167721	TSR1	up	YES	NO	0.32179	0.0257239	-0.298974	0.0389957
209.254	-0.90216	0.181802	-4.96233	6.96534e-07	8.13186e-06	ENSG00000165389.7_SPTSSA	ENSG00000165389	SPTSSA	down	YES	NO	-0.29904	0.0389509	0.48007	0.000554361
117.703	1.35154	0.272385	4.96188	6.98138e-07	8.1446e-06	ENSG00000123131.13_PRDX4	ENSG00000123131	PRDX4	up	YES	NO	0.302036	0.0369417	-0.301773	0.0371142
130.531	0.949645	0.1914	4.96158	6.99223e-07	8.15128e-06	ENSG00000198040.11_ZNF84	ENSG00000198040	ZNF84	up	YES	NO	0.256336	0.0786366	-0.32497	0.0242175
170.788	0.6123	0.123412	4.96143	6.99758e-07	8.15154e-06	ENSG00000151176.8_PLBD2	ENSG00000151176	PLBD2	up	YES	NO	0.286188	0.0486134	-0.306195	0.0342941
2411.12	1.38932	0.280078	4.96048	7.03185e-07	8.18547e-06	ENSG00000064651.14_SLC12A2	ENSG00000064651	SLC12A2	up	YES	NO	0.248169	0.0889872	-0.324432	0.024467
72.7028	0.992787	0.200149	4.96024	7.04077e-07	8.18985e-06	ENSG00000114767.7_RRP9	ENSG00000114767	RRP9	up	YES	NO	0.24423	0.0943447	-0.333228	0.0206459
89.8581	1.30938	0.264044	4.95894	7.08792e-07	8.23867e-06	ENSG00000127564.17_PKMYT1	ENSG00000127564	PKMYT1	up	YES	NO	0.256412	0.0785456	-0.343934	0.0166858
254.722	0.747283	0.1507	4.95876	7.09454e-07	8.24034e-06	ENSG00000135372.9_NAT10	ENSG00000135372	NAT10	up	YES	YES	0.275719	0.0578504	-0.351995	0.0141476
253.207	-0.809674	0.163296	-4.95832	7.1104e-07	8.25274e-06	ENSG00000072415.10_MPP5	ENSG00000072415	MPP5	down	YES	NO	-0.289435	0.0460055	0.495595	0.000341407
48.5729	1.38033	0.278402	4.95807	7.11975e-07	8.25756e-06	ENSG00000111450.14_STX2	ENSG00000111450	STX2	up	YES	NO	0.354352	0.0134708	-0.287261	0.0477387
133.223	1.12422	0.226775	4.95742	7.14366e-07	8.27213e-06	ENSG00000125885.13_MCM8	ENSG00000125885	MCM8	up	YES	NO	0.29088	0.044882	-0.248379	0.0887083
109.563	0.68852	0.13889	4.9573	7.14792e-07	8.27213e-06	ENSG00000163900.11_TMEM41A	ENSG00000163900	TMEM41A	up	YES	NO	0.173639	0.237887	-0.370885	0.00945602
176.916	0.927422	0.187076	4.95747	7.14162e-07	8.27213e-06	ENSG00000165661.17_QSOX2	ENSG00000165661	QSOX2	up	YES	NO	0.277674	0.0560258	-0.430868	0.00223437
151.031	-0.662977	0.133751	-4.95682	7.16576e-07	8.28675e-06	ENSG00000138942.16_RNF185	ENSG00000138942	RNF185	down	YES	NO	-0.357287	0.012667	0.434594	0.00202482
63.9961	0.926244	0.186876	4.95646	7.17882e-07	8.28979e-06	ENSG00000187838.17_PLSCR3	ENSG00000187838	PLSCR3	up	YES	NO	0.26106	0.0730972	-0.480847	0.000541375
15.4891	1.20297	0.242705	4.9565	7.17761e-07	8.28979e-06	ENSG00000262468.6_LINC01569	ENSG00000262468	LINC01569	up	YES	NO	0.319707	0.0267531	-0.324811	0.0242908
197.521	0.80446	0.162316	4.95615	7.19042e-07	8.29716e-06	ENSG00000116062.17_MSH6	ENSG00000116062	MSH6	up	YES	YES	0.161662	0.272316	-0.307733	0.0333562
1277.27	-1.14731	0.231513	-4.95571	7.20678e-07	8.31001e-06	ENSG00000124762.14_CDKN1A	ENSG00000124762	CDKN1A	down	YES	NO	-0.375512	0.0085369	0.404063	0.00439684
51.1689	1.18813	0.239817	4.95431	7.25871e-07	8.36382e-06	ENSG00000243406.6_MRPS31P5	ENSG00000243406	MRPS31P5	up	YES	NO	0.143627	0.330102	-0.253817	0.0817232
232.997	1.10208	0.222465	4.95397	7.27132e-07	8.37228e-06	ENSG00000162413.16_KLHL21	ENSG00000162413	KLHL21	up	YES	NO	0.308008	0.0331904	-0.327688	0.0229887
860.624	-0.556851	0.112439	-4.95247	7.32783e-07	8.43125e-06	ENSG00000169926.11_KLF13	ENSG00000169926	KLF13	down	YES	NO	-0.28597	0.0487934	0.406684	0.00412505
1737.86	-1.52582	0.308172	-4.95119	7.37629e-07	8.48087e-06	ENSG00000002726.21_AOC1	ENSG00000002726	AOC1	down	YES	NO	-0.432169	0.00215913	0.447041	0.00144541
100.666	1.06257	0.214675	4.94969	7.43309e-07	8.54e-06	ENSG00000141577.14_CEP131	ENSG00000141577	CEP131	up	YES	NO	0.434012	0.00205635	-0.386007	0.00673343
551.894	-0.811046	0.163898	-4.94849	7.47922e-07	8.58679e-06	ENSG00000164506.14_STXBP5	ENSG00000164506	STXBP5	down	YES	NO	-0.318909	0.0271562	0.361022	0.0117034
45.6217	-2.23592	0.451921	-4.94759	7.5139e-07	8.62039e-06	ENSG00000171126.8_KCNG3	ENSG00000171126	KCNG3	down	YES	NO	-0.301237	0.0374685	0.404796	0.00431931
11.085	1.5826	0.319918	4.94688	7.54107e-07	8.64531e-06	ENSG00000169330.9_MINAR1	ENSG00000169330	MINAR1	up	YES	NO	0.143729	0.329755	-0.374036	0.00882131
688.854	-0.634789	0.128365	-4.9452	7.60643e-07	8.71397e-06	ENSG00000129353.15_SLC44A2	ENSG00000129353	SLC44A2	down	YES	NO	-0.3877	0.00647603	0.438562	0.00182101
132.925	0.895441	0.181112	4.94412	7.64875e-07	8.75614e-06	ENSG00000157593.19_SLC35B2	ENSG00000157593	SLC35B2	up	YES	NO	0.155093	0.292536	-0.376586	0.00833493
102.12	0.585523	0.118432	4.94394	7.65592e-07	8.75804e-06	ENSG00000168495.13_POLR3D	ENSG00000168495	POLR3D	up	YES	NO	0.270632	0.0628211	-0.328562	0.022605
664.472	-1.38853	0.280989	-4.9416	7.74827e-07	8.85731e-06	ENSG00000184232.9_OAF	ENSG00000184232	OAF	down	YES	NO	-0.361883	0.0114906	0.297296	0.0401608
167.938	-1.17513	0.237957	-4.93841	7.87605e-07	8.99692e-06	ENSG00000162407.9_PLPP3	ENSG00000162407	PLPP3	down	YES	NO	-0.2621	0.0719206	0.451621	0.0012727
71.7805	0.942959	0.190973	4.93766	7.90645e-07	9.02516e-06	ENSG00000070718.12_AP3M2	ENSG00000070718	AP3M2	up	YES	NO	0.211018	0.149949	-0.301234	0.0374709
403.647	0.671896	0.136165	4.93442	8.03887e-07	9.16377e-06	ENSG00000131263.13_RLIM	ENSG00000131263	RLIM	up	YES	YES	0.295415	0.0415011	-0.31658	0.0283621
16.5616	1.33353	0.27025	4.93441	8.0394e-07	9.16377e-06	ENSG00000227199.1_ST7-AS1	ENSG00000227199	ST7-AS1	up	YES	NO	0.168987	0.250886	-0.376016	0.00844153
652.341	0.905949	0.183621	4.93379	8.06494e-07	9.18629e-06	ENSG00000124181.14_PLCG1	ENSG00000124181	PLCG1	up	YES	NO	0.260774	0.073424	-0.301836	0.0370729
1642.97	-0.760494	0.154184	-4.93237	8.12381e-07	9.24672e-06	ENSG00000171603.18_CLSTN1	ENSG00000171603	CLSTN1	down	YES	NO	-0.406221	0.00417195	0.416299	0.00324997
85.9249	0.763167	0.154875	4.92764	8.32284e-07	9.46649e-06	ENSG00000146416.19_AIG1	ENSG00000146416	AIG1	up	YES	NO	0.203574	0.165197	-0.370932	0.00944617
39.4347	1.75709	0.356621	4.92705	8.34824e-07	9.48859e-06	ENSG00000183960.9_KCNH8	ENSG00000183960	KCNH8	up	YES	NO	0.492344	0.000378608	-0.249473	0.0872666
448.878	-0.833099	0.169104	-4.92655	8.36939e-07	9.50584e-06	ENSG00000176845.13_METRNL	ENSG00000176845	METRNL	down	YES	NO	-0.278603	0.0551749	0.366235	0.0104644
482.399	-1.27798	0.259429	-4.92613	8.38736e-07	9.51944e-06	ENSG00000237289.10_CKMT1B	ENSG00000237289	CKMT1B	down	YES	NO	-0.371512	0.00932652	0.532837	9.66719e-05
2369.66	-0.935923	0.190015	-4.92553	8.4133e-07	9.54208e-06	ENSG00000005022.6_SLC25A5	ENSG00000005022	SLC25A5	down	YES	NO	-0.396073	0.00532465	0.447999	0.00140765
183.246	1.52623	0.309892	4.92505	8.43397e-07	9.55869e-06	ENSG00000162512.16_SDC3	ENSG00000162512	SDC3	up	YES	NO	0.233821	0.109706	-0.377516	0.00816334
86.5457	-1.44369	0.293192	-4.92405	8.47725e-07	9.60091e-06	ENSG00000139117.14_CPNE8	ENSG00000139117	CPNE8	down	YES	NO	-0.194449	0.185385	0.449067	0.0013666
1387.69	-1.68173	0.341573	-4.9235	8.5011e-07	9.62106e-06	ENSG00000137628.18_DDX60	ENSG00000137628	DDX60	down	YES	NO	-0.352045	0.014133	0.366248	0.0104615
37.0475	1.71273	0.348062	4.92075	8.62151e-07	9.74347e-06	ENSG00000176170.14_SPHK1	ENSG00000176170	SPHK1	up	YES	NO	0.177482	0.227498	-0.450806	0.00130203
314.921	-3.02121	0.613971	-4.92076	8.62079e-07	9.74347e-06	ENSG00000182271.13_TMIGD1	ENSG00000182271	TMIGD1	down	YES	NO	-0.400222	0.00482348	0.531622	0.000100974
40.609	0.941755	0.191401	4.92032	8.64026e-07	9.7508e-06	ENSG00000135622.13_SEMA4F	ENSG00000135622	SEMA4F	up	YES	NO	0.155415	0.291522	-0.329809	0.0220665
68.6699	1.1575	0.235243	4.92045	8.6345e-07	9.7508e-06	ENSG00000167566.17_NCKAP5L	ENSG00000167566	NCKAP5L	up	YES	NO	0.336429	0.0193864	-0.330476	0.0217832
36.1856	1.38573	0.281681	4.9195	8.67664e-07	9.78491e-06	ENSG00000117877.11_POLR1G	ENSG00000117877	POLR1G	up	YES	NO	0.288529	0.0467212	-0.314279	0.0295967
2888.2	-1.60818	0.326923	-4.91914	8.69245e-07	9.7958e-06	ENSG00000099834.19_CDHR5	ENSG00000099834	CDHR5	down	YES	NO	-0.296924	0.040423	0.4161	0.0032662
44.8146	1.00116	0.203531	4.91894	8.70133e-07	9.79885e-06	ENSG00000146733.14_PSPH	ENSG00000146733	PSPH	up	YES	NO	0.174338	0.235973	-0.440361	0.00173474
12.9241	1.76167	0.358169	4.91855	8.71891e-07	9.8117e-06	ENSG00000197472.15_ZNF695	ENSG00000197472	ZNF695	up	YES	NO	0.296772	0.0405308	-0.355331	0.0131981
162.439	0.631251	0.128388	4.91673	8.8001e-07	9.89607e-06	ENSG00000090273.14_NUDC	ENSG00000090273	NUDC	up	YES	NO	0.338595	0.0185715	-0.443147	0.00160837
96.8975	-1.20026	0.244219	-4.91469	8.89231e-07	9.99269e-06	ENSG00000105851.11_PIK3CG	ENSG00000105851	PIK3CG	down	YES	NO	-0.187679	0.201465	0.396771	0.00523732
53.3832	1.04767	0.213211	4.91379	8.93316e-07	1.00315e-05	ENSG00000101945.17_SUV39H1	ENSG00000101945	SUV39H1	up	YES	YES	0.251118	0.0851347	-0.387997	0.00643173
1272.99	-1.23479	0.251309	-4.91345	8.94873e-07	1.00419e-05	ENSG00000111319.13_SCNN1A	ENSG00000111319	SCNN1A	down	YES	NO	-0.295542	0.0414096	0.332338	0.0210081
220.037	-0.780804	0.15898	-4.91132	9.04647e-07	1.01444e-05	ENSG00000151327.13_FAM177A1	ENSG00000151327	FAM177A1	down	YES	NO	-0.357714	0.0125534	0.306455	0.0341341
74.475	0.678327	0.13814	4.91042	9.0883e-07	1.01841e-05	ENSG00000180822.12_PSMG4	ENSG00000180822	PSMG4	up	YES	NO	0.0465472	0.753401	-0.282194	0.0519851
130.376	-0.932875	0.189985	-4.91027	9.0952e-07	1.01847e-05	ENSG00000100490.10_CDKL1	ENSG00000100490	CDKL1	down	YES	NO	-0.366703	0.0103588	0.402451	0.00457173
34.5635	-2.12422	0.432703	-4.9092	9.14482e-07	1.02331e-05	ENSG00000243064.8_ABCC13	ENSG00000243064	ABCC13	down	YES	NO	-0.323984	0.0246765	0.45768	0.00107261
647.627	-0.840011	0.171203	-4.90652	9.27053e-07	1.03664e-05	ENSG00000100647.8_SUSD6	ENSG00000100647	SUSD6	down	YES	NO	-0.343624	0.0167905	0.372257	0.0091749
159.079	0.790469	0.161119	4.90613	9.28895e-07	1.03797e-05	ENSG00000012232.9_EXTL3	ENSG00000012232	EXTL3	up	YES	NO	0.236543	0.105516	-0.201979	0.168606
395.492	-1.29514	0.26404	-4.9051	9.33778e-07	1.0427e-05	ENSG00000148584.15_A1CF	ENSG00000148584	A1CF	down	YES	YES	-0.392477	0.00579523	0.471428	0.000719026
7822.18	-2.56452	0.522861	-4.90479	9.35255e-07	1.04361e-05	ENSG00000007306.15_CEACAM7	ENSG00000007306	CEACAM7	down	YES	NO	-0.375456	0.0085475	0.512606	0.000195346
1378.58	-0.869967	0.177376	-4.90466	9.35906e-07	1.04361e-05	ENSG00000102804.15_TSC22D1	ENSG00000102804	TSC22D1	down	YES	NO	-0.304107	0.0356028	0.437498	0.00187377
69.9771	1.85425	0.378097	4.90417	9.38215e-07	1.04545e-05	ENSG00000135069.14_PSAT1	ENSG00000135069	PSAT1	up	YES	NO	0.281385	0.0526907	-0.344238	0.0165834
157.536	1.20242	0.24523	4.90321	9.4283e-07	1.04986e-05	ENSG00000136108.15_CKAP2	ENSG00000136108	CKAP2	up	YES	NO	0.280662	0.0533269	-0.261622	0.0724595
852.833	0.837049	0.17079	4.90104	9.53292e-07	1.06076e-05	ENSG00000197157.11_SND1	ENSG00000197157	SND1	up	YES	NO	0.318512	0.0273588	-0.308787	0.0327256
220.62	-1.00583	0.205273	-4.89995	9.58605e-07	1.06593e-05	ENSG00000183475.13_ASB7	ENSG00000183475	ASB7	down	YES	NO	-0.34873	0.0151329	0.324959	0.0242221
2193.24	-1.7768	0.362723	-4.89849	9.65782e-07	1.07316e-05	ENSG00000250722.6_SELENOP	ENSG00000250722	SELENOP	down	YES	NO	-0.284732	0.0498211	0.430443	0.00225946
493.783	-0.815838	0.166663	-4.89514	9.82372e-07	1.09013e-05	ENSG00000138029.14_HADHB	ENSG00000138029	HADHB	down	YES	NO	-0.402449	0.00457188	0.480202	0.000552134
2126.59	-1.26376	0.258166	-4.89513	9.82429e-07	1.09013e-05	ENSG00000204385.13_SLC44A4	ENSG00000204385	SLC44A4	down	YES	NO	-0.371461	0.00933701	0.468513	0.00078374
79.9829	-1.50496	0.307518	-4.89388	9.88648e-07	1.09627e-05	ENSG00000158825.6_CDA	ENSG00000158825	CDA	down	YES	NO	-0.246497	0.091232	0.372803	0.00906506
51.8555	1.43359	0.293053	4.89192	9.98546e-07	1.10647e-05	ENSG00000140937.14_CDH11	ENSG00000140937	CDH11	up	YES	NO	0.178942	0.223634	-0.305348	0.0348201
747.601	-0.606394	0.123985	-4.89086	1.00398e-06	1.11172e-05	ENSG00000172725.14_CORO1B	ENSG00000172725	CORO1B	down	YES	NO	-0.353384	0.0137455	0.393657	0.00563689
26.7882	-1.70012	0.347704	-4.88956	1.01061e-06	1.11828e-05	ENSG00000286035.1_RP11-429O22.1	ENSG00000286035	RP11-429O22	down	YES	NO	-0.284658	0.0498832	0.417104	0.00318473
43.3045	2.36501	0.483837	4.88803	1.01848e-06	1.12621e-05	ENSG00000005001.10_PRSS22	ENSG00000005001	PRSS22	up	YES	NO	0.354352	0.0134708	-0.405961	0.00419855
448.357	1.04596	0.214083	4.88576	1.03032e-06	1.13718e-05	ENSG00000061938.21_TNK2	ENSG00000061938	TNK2	up	YES	NO	0.230046	0.115725	-0.363581	0.0110803
805.918	-1.01529	0.207798	-4.88594	1.02935e-06	1.13718e-05	ENSG00000067141.17_NEO1	ENSG00000067141	NEO1	down	YES	NO	-0.426205	0.00252359	0.463229	0.000914537
17.4659	1.88541	0.385903	4.88571	1.03055e-06	1.13718e-05	ENSG00000211448.13_DIO2	ENSG00000211448	DIO2	up	YES	NO	0.209548	0.152876	-0.328057	0.0228261
684.553	-0.534533	0.109431	-4.88465	1.03611e-06	1.14173e-05	ENSG00000008130.15_NADK	ENSG00000008130	NADK	down	YES	NO	-0.302201	0.0368331	0.332311	0.021019
1023.85	-0.996681	0.204039	-4.88476	1.03555e-06	1.14173e-05	ENSG00000104880.19_ARHGEF18	ENSG00000104880	ARHGEF18	down	YES	NO	-0.198489	0.17624	0.338003	0.0187916
216.784	1.9043	0.389937	4.88362	1.04158e-06	1.14696e-05	ENSG00000009950.16_MLXIPL	ENSG00000009950	MLXIPL	up	YES	NO	0.301479	0.0373081	-0.301234	0.037471
10.3023	1.4061	0.288091	4.88074	1.05687e-06	1.163e-05	ENSG00000286004.1_RP11-352G9.2	ENSG00000286004	RP11-352G9	up	YES	NO	0.301036	0.0376023	-0.281312	0.0527546
30.0543	1.23691	0.253461	4.88006	1.06051e-06	1.1662e-05	ENSG00000103494.16_RPGRIP1L	ENSG00000103494	RPGRIP1L	up	YES	NO	0.224415	0.125167	-0.284325	0.0501636
154.96	-2.31744	0.474913	-4.87972	1.06239e-06	1.16745e-05	ENSG00000186198.4_SLC51B	ENSG00000186198	SLC51B	down	YES	NO	-0.389736	0.00617775	0.535078	8.91784e-05
21.7524	1.57686	0.323159	4.87952	1.06346e-06	1.16782e-05	ENSG00000050438.17_SLC4A8	ENSG00000050438	SLC4A8	up	YES	NO	0.235087	0.107742	-0.13645	0.355086
143.717	-1.29749	0.265969	-4.87836	1.06974e-06	1.1731e-05	ENSG00000176438.13_SYNE3	ENSG00000176438	SYNE3	down	YES	NO	-0.208208	0.155579	0.298229	0.0395101
2092.28	-1.09126	0.223754	-4.87704	1.07688e-06	1.17849e-05	ENSG00000140391.15_TSPAN3	ENSG00000140391	TSPAN3	down	YES	NO	-0.382051	0.00736997	0.382335	0.0073226
18.9003	2.09303	0.429147	4.87717	1.07617e-06	1.17849e-05	ENSG00000155265.11_GOLGA7B	ENSG00000155265	GOLGA7B	up	YES	NO	0.25689	0.0779711	-0.304029	0.0356528
32.9641	-2.11558	0.433773	-4.87716	1.07624e-06	1.17849e-05	ENSG00000232756.1_DDX3ILA1	ENSG00000232756	DDX3ILA1	down	YES	NO	-0.400025	0.00484637	0.348845	0.0150971
50.7215	-0.857851	0.175968	-4.87503	1.08789e-06	1.18972e-05	ENSG00000034533.12_ASTE1	ENSG00000034533	ASTE1	down	YES	NO	-0.408737	0.00392252	0.432566	0.0021366
101.583	0.94055	0.192939	4.87485	1.08893e-06	1.19004e-05	ENSG00000133247.14_KMT5C	ENSG00000133247	KMT5C	up	YES	YES	0.297977	0.0396849	-0.442753	0.00162574
326.323	-0.924308	0.189628	-4.87431	1.09187e-06	1.19243e-05	ENSG00000164938.14_TP53INP1	ENSG00000164938	TP53INP1	down	YES	NO	-0.187728	0.201345	0.373782	0.00887108
47.2068	0.770167	0.158022	4.8738	1.09474e-06	1.19474e-05	ENSG00000237399.7_PITRM1-AS1	ENSG00000237399	PITRM1-AS1	up	YES	NO	0.410023	0.00380023	-0.36564	0.0105998
431.871	-0.501051	0.10281	-4.87357	1.09597e-06	1.19527e-05	ENSG00000100330.16_MTMR3	ENSG00000100330	MTMR3	down	YES	NO	-0.264266	0.0695175	0.454444	0.00117568
61.61	-1.55473	0.319025	-4.87339	1.09698e-06	1.19555e-05	ENSG00000137251.16_TINAG	ENSG00000137251	TINAG	down	YES	NO	-0.449296	0.00135794	0.438357	0.0018311
22.5431	1.333	0.273694	4.8704	1.11374e-06	1.21299e-05	ENSG00000179859.10_RNF227	ENSG00000179859	RNF227	up	YES	NO	0.217218	0.138066	-0.406245	0.0041695
484.267	-0.787216	0.161672	-4.86922	1.12037e-06	1.21937e-05	ENSG00000135766.9_EGLN1	ENSG00000135766	EGLN1	down	YES	NO	-0.3335	0.0205364	0.355378	0.0131849
171.408	0.999945	0.20539	4.86851	1.12443e-06	1.22296e-05	ENSG00000099810.21_MTAP	ENSG00000099810	MTAP	up	YES	NO	0.179442	0.222322	-0.356032	0.0130054
61.8331	1.09331	0.224579	4.86826	1.12587e-06	1.22368e-05	ENSG00000072422.17_RHOBTB1	ENSG00000072422	RHOBTB1	up	YES	NO	0.0702652	0.635096	-0.288721	0.046569
132.019	0.806261	0.165623	4.86807	1.12696e-06	1.22403e-05	ENSG00000148120.18_AOPEP	ENSG00000148120	AOPEP	up	YES	NO	0.393905	0.00560411	-0.321783	0.0257276
77.9436	1.57554	0.323681	4.86758	1.12972e-06	1.22535e-05	ENSG00000021300.14_PLEKHB1	ENSG00000021300	PLEKHB1	up	YES	NO	0.288785	0.0465186	-0.0967109	0.513172
688.454	-0.815999	0.167639	-4.86758	1.1297e-06	1.22535e-05	ENSG00000138594.14_TMOD3	ENSG00000138594	TMOD3	down	YES	NO	-0.309728	0.0321705	0.39558	0.00538716
359.847	1.57569	0.324085	4.86197	1.16223e-06	1.25975e-05	ENSG00000186193.9_SAPCD2	ENSG00000186193	SAPCD2	up	YES	NO	0.217297	0.137918	-0.272579	0.0608794
653.73	0.961405	0.197751	4.86168	1.16391e-06	1.26072e-05	ENSG00000065150.21_IPO5	ENSG00000065150	IPO5	up	YES	NO	0.247866	0.0893905	-0.259746	0.0746065
279.822	-0.944191	0.194266	-4.86031	1.17203e-06	1.26865e-05	ENSG00000117758.14_STX12	ENSG00000117758	STX12	down	YES	NO	-0.330985	0.0215688	0.485483	0.000469386
531.322	0.746055	0.153561	4.85835	1.18366e-06	1.28037e-05	ENSG00000139842.15_CUL4A	ENSG00000139842	CUL4A	up	YES	YES	0.299326	0.0387549	-0.360806	0.0117574
206.915	-0.855784	0.176169	-4.85773	1.18736e-06	1.2835e-05	ENSG00000140848.17_CPNE2	ENSG00000140848	CPNE2	down	YES	NO	-0.296589	0.0406606	0.26891	0.0645793
53.0558	1.05816	0.217859	4.85709	1.19124e-06	1.28682e-05	ENSG00000103351.13_CLUAP1	ENSG00000103351	CLUAP1	up	YES	NO	0.287834	0.0472769	-0.20303	0.166353
31.3201	2.36519	0.486997	4.85668	1.19372e-06	1.28862e-05	ENSG00000114115.10_RBP1	ENSG00000114115	RBP1	up	YES	NO	0.179228	0.222885	-0.134615	0.361654
4270.34	0.584838	0.120436	4.856	1.19779e-06	1.29213e-05	ENSG00000187514.17_PTMA	ENSG00000187514	PTMA	up	YES	NO	0.244064	0.0945752	-0.359823	0.0120056
535.866	-1.2547	0.258404	-4.85556	1.20044e-06	1.29412e-05	ENSG00000178078.12_STAP2	ENSG00000178078	STAP2	down	YES	NO	-0.331691	0.0212749	0.433124	0.00210531
783.712	-0.9433	0.194355	-4.85349	1.21306e-06	1.30684e-05	ENSG00000151491.14_EPS8	ENSG00000151491	EPS8	down	YES	NO	-0.218737	0.135265	0.374805	0.00867199
340.645	0.58057	0.119634	4.8529	1.21668e-06	1.30969e-05	ENSG00000138668.19_HNRNPD	ENSG00000138668	HNRNPD	up	YES	NO	0.34934	0.0149446	-0.313205	0.0301882
174.903	0.75287	0.155142	4.85279	1.21736e-06	1.30969e-05	ENSG00000163482.12_STK36	ENSG00000163482	STK36	up	YES	NO	0.339327	0.0183028	-0.311282	0.0312717
113.318	0.990128	0.20405	4.85237	1.21994e-06	1.31158e-05	ENSG00000176124.15_DLEU1	ENSG00000176124	DLEU1	up	YES	NO	0.28097	0.053055	-0.429275	0.00232972
175.848	-1.05392	0.217268	-4.85079	1.22968e-06	1.32116e-05	ENSG00000130545.16_CRB3	ENSG00000130545	CRB3	down	YES	NO	-0.347227	0.0156057	0.374499	0.00873118
681.109	-0.534053	0.110101	-4.8506	1.23089e-06	1.32157e-05	ENSG00000024048.11_UBR2	ENSG00000024048	UBR2	down	YES	YES	-0.257981	0.0766716	0.37224	0.00917824
81.6658	1.27363	0.262581	4.85041	1.23205e-06	1.32192e-05	ENSG00000188677.15_PARVB	ENSG00000188677	PARVB	up	YES	NO	0.265373	0.0683133	-0.324748	0.0243201
136.832	0.562448	0.115966	4.85011	1.23394e-06	1.32305e-05	ENSG00000062598.18_ELMO2	ENSG00000062598	ELMO2	up	YES	NO	0.138873	0.346526	-0.241055	0.0988417
498.419	-1.18813	0.245006	-4.8494	1.23833e-06	1.32687e-05	ENSG00000112773.16_TENT5A	ENSG00000112773	TENT5A	down	YES	NO	-0.300195	0.038166	0.402705	0.00454375
2004.22	-1.27688	0.263321	-4.84916	1.23983e-06	1.32758e-05	ENSG00000160685.13_ZBTB7B	ENSG00000160685	ZBTB7B	down	YES	NO	-0.303502	0.0359896	0.371252	0.00938009
2306.75	-1.76915	0.364873	-4.84869	1.24279e-06	1.32896e-05	ENSG00000176387.7_HSD11B2	ENSG00000176387	HSD11B2	down	YES	NO	-0.400528	0.0047882	0.444161	0.00156442
622.843	0.545822	0.112647	4.84544	1.26333e-06	1.35001e-05	ENSG00000196313.12_POM121	ENSG00000196313	POM121	up	YES	NO	0.255491	0.079662	-0.383389	0.0071492
85.4741	0.777023	0.160377	4.84499	1.26619e-06	1.35216e-05	ENSG00000172766.19_NAA16	ENSG00000172766	NAA16	up	YES	NO	0.284083	0.0503676	-0.274944	0.0585865
17.1742	1.35001	0.278675	4.84438	1.27009e-06	1.35542e-05	ENSG00000113248.6_PCDHB15	ENSG00000113248	PCDHB15	up	YES	NO	0.123102	0.404522	-0.266035	0.067602
27.8967	1.7879	0.369111	4.84381	1.27374e-06	1.35749e-05	ENSG00000115919.15_KYNU	ENSG00000115919	KYNU	up	YES	NO	0.235544	0.107038	-0.225868	0.122676
104.564	0.956362	0.197449	4.8436	1.27508e-06	1.35801e-05	ENSG00000080839.12_RBL1	ENSG00000080839	RBL1	up	YES	NO	0.157964	0.28358	-0.256166	0.0788423
438.677	-0.851685	0.17592	-4.84133	1.2897e-06	1.37266e-05	ENSG00000169021.6_UQCRFS1	ENSG00000169021	UQCRFS1	down	YES	NO	-0.432829	0.00212181	0.444318	0.0015577
606.103	1.40201	0.289613	4.84097	1.29205e-06	1.37424e-05	ENSG00000142102.16_PGGHG	ENSG00000142102	PGGHG	up	YES	NO	0.461591	0.000958863	-0.423803	0.00268504
71.1071	0.662318	0.136829	4.84046	1.29536e-06	1.37592e-05	ENSG00000137054.16_POLR1E	ENSG00000137054	POLR1E	up	YES	NO	0.286494	0.0483626	-0.263242	0.0706456
1990.48	-0.839024	0.173357	-4.83987	1.29926e-06	1.37914e-05	ENSG00000197077.14_KIAA1671	ENSG00000197077	KIAA1671	down	YES	NO	-0.183495	0.211881	0.386599	0.00664245
379.982	0.702237	0.145133	4.83857	1.30774e-06	1.38722e-05	ENSG00000155561.15_NUP205	ENSG00000155561	NUP205	up	YES	NO	0.216385	0.13962	-0.349875	0.0147809
18.3378	1.65133	0.341413	4.83675	1.31977e-06	1.39905e-05	ENSG00000188372.15_ZP3	ENSG00000188372	ZP3	up	YES	NO	0.254331	0.0810861	-0.287113	0.0478585
604.625	-1.0045	0.207701	-4.83628	1.32293e-06	1.40146e-05	ENSG00000172340.15_SUCLG2	ENSG00000172340	SUCLG2	down	YES	NO	-0.370864	0.00946026	0.490666	0.000399209
448.453	-0.812623	0.16805	-4.83561	1.32741e-06	1.40527e-05	ENSG00000155158.20_TTC39B	ENSG00000155158	TTC39B	down	YES	NO	-0.368031	0.0100643	0.3135	0.0300245
79.2188	1.38409	0.28628	4.83474	1.33322e-06	1.41048e-05	ENSG00000188158.16_NHS	ENSG00000188158	NHS	up	YES	NO	0.303895	0.0357379	-0.323759	0.0247822
60.3263	1.00336	0.207543	4.83446	1.33506e-06	1.41149e-05	ENSG00000064102.15_INTS13	ENSG00000064102	INTS13	up	YES	NO	0.251176	0.0850595	-0.269097	0.0643863
651.465	-1.18514	0.245218	-4.83301	1.34481e-06	1.42086e-05	ENSG00000119514.7_GALNT12	ENSG00000119514	GALNT12	down	YES	NO	-0.323043	0.0251214	0.344738	0.0164165
51.5703	1.67179	0.345987	4.83194	1.35207e-06	1.42663e-05	ENSG00000143590.14_EFNA3	ENSG00000143590	EFNA3	up	YES	NO	0.26643	0.0671806	-0.266807	0.0667791
193.338	-1.22333	0.25317	-4.83205	1.35135e-06	1.42663e-05	ENSG00000163235.16_TGFA	ENSG00000163235	TGFA	down	YES	NO	-0.380111	0.00770085	0.399031	0.00496296
253.323	-1.53493	0.317698	-4.8314	1.35576e-06	1.42958e-05	ENSG00000116833.14_NR5A2	ENSG00000116833	NR5A2	down	YES	NO	-0.267383	0.0661712	0.478882	0.000574783
281.018	0.557782	0.115454	4.83121	1.35709e-06	1.43003e-05	ENSG00000170265.12_ZNF282	ENSG00000170265	ZNF282	up	YES	NO	0.226966	0.12082	-0.44922	0.0013608
6682.84	-0.99042	0.205037	-4.83045	1.36226e-06	1.43453e-05	ENSG00000163399.16_ATP1A1	ENSG00000163399	ATP1A1	down	YES	NO	-0.424895	0.00261055	0.331858	0.0212058
102.362	1.2734	0.263743	4.82818	1.37786e-06	1.44999e-05	ENSG00000116857.17_TMEM9	ENSG00000116857	TMEM9	up	YES	NO	0.193524	0.187527	-0.34349	0.016836
1006.8	-0.642052	0.132988	-4.82788	1.37993e-06	1.45121e-05	ENSG00000138760.11_SCARB2	ENSG00000138760	SCARB2	down	YES	NO	-0.31692	0.0281833	0.353741	0.0136436
17.4169	1.67983	0.348025	4.82674	1.38788e-06	1.4586e-05	ENSG00000287839.1_RP11-29H23.8	ENSG00000287839	RP11-29H23	up	YES	NO	0.382023	0.00737472	-0.279941	0.0539681
30.9733	0.789586	0.163597	4.82641	1.39018e-06	1.45991e-05	ENSG00000143224.18_PPOX	ENSG00000143224	PPOX	up	YES	NO	0.281936	0.0522087	-0.385386	0.00683009
756.885	-0.991424	0.205421	-4.8263	1.39096e-06	1.45991e-05	ENSG00000205352.11_PRR13	ENSG00000205352	PRR13	down	YES	NO	-0.297667	0.039901	0.419379	0.0030065
228.947	-1.31911	0.273349	-4.82575	1.39478e-06	1.46295e-05	ENSG00000166510.14_CCDC68	ENSG00000166510	CCDC68	down	YES	NO	-0.342165	0.0172919	0.429375	0.00232362
101.613	-2.06501	0.428065	-4.82405	1.40671e-06	1.47256e-05	ENSG00000130055.14_GDPD2	ENSG00000130055	GDPD2	down	YES	NO	-0.368882	0.00987953	0.47301	0.000685945
191.529	0.660468	0.136905	4.82429	1.40506e-06	1.47256e-05	ENSG00000136877.15_FPGS	ENSG00000136877	FPGS	up	YES	NO	0.315667	0.0288467	-0.394782	0.00548955
51.6944	1.35581	0.281051	4.82405	1.40671e-06	1.47256e-05	ENSG00000285043.3_CTD-2515O10.6	ENSG00000285043	CTD-2515O10	up	YES	NO	0.286074	0.0487077	-0.33044	0.0217983
31.9905	2.06642	0.428385	4.82374	1.40892e-06	1.47389e-05	ENSG00000164764.11_SBSPON	ENSG00000164764	SBSPON	up	YES	NO	0.145763	0.322885	-0.204601	0.163027
228.556	0.59715	0.123801	4.82345	1.41093e-06	1.47503e-05	ENSG00000104897.10_SF3A2	ENSG00000104897	SF3A2	up	YES	NO	0.38615	0.00671142	-0.424708	0.0026232
95.1332	0.640311	0.132781	4.82231	1.41905e-06	1.48254e-05	ENSG00000162585.17_FAAP20	ENSG00000162585	FAAP20	up	YES	NO	0.3668	0.010337	-0.487855	0.000435988
12.4109	1.42198	0.295083	4.81893	1.44334e-06	1.50693e-05	ENSG00000261572.1_RP11-384L8.1	ENSG00000261572	RP11-384L8	up	YES	NO	0.262574	0.0713894	-0.432179	0.00215856
195.512	0.930303	0.193066	4.81857	1.4459e-06	1.50862e-05	ENSG00000165684.5_SNAPC4	ENSG00000165684	SNAPC4	up	YES	NO	0.412692	0.00355689	-0.363327	0.0111408
482.039	-0.561465	0.116567	-4.81666	1.45978e-06	1.5221e-05	ENSG00000179091.5_CYC1	ENSG00000179091	CYC1	down	YES	NO	-0.359943	0.0119752	0.467182	0.000814999
67.1701	-1.29807	0.269669	-4.81355	1.48271e-06	1.54499e-05	ENSG00000178075.20_GRAMD1C	ENSG00000178075	GRAMD1C	down	YES	NO	-0.379335	0.00783673	0.424819	0.00261564
344.727	0.799369	0.166102	4.81251	1.49048e-06	1.55207e-05	ENSG00000090861.17_AARS1	ENSG00000090861	AARS1	up	YES	NO	0.448366	0.00139344	-0.294238	0.0423578
116.656	0.835031	0.17363	4.80926	1.51489e-06	1.57646e-05	ENSG00000085185.16_BCORL1	ENSG00000085185	BCORL1	up	YES	YES	0.362563	0.0113246	-0.391782	0.00589021
46.2605	0.885068	0.184071	4.80829	1.52225e-06	1.58212e-05	ENSG00000105185.12_PDCD5	ENSG00000105185	PDCD5	up	YES	NO	0.201936	0.168697	-0.174252	0.236207
36.0248	1.90255	0.395812	4.8067	1.53444e-06	1.59367e-05	ENSG00000205502.4_C2CD4B	ENSG00000205502	C2CD4B	up	YES	NO	0.426446	0.00250785	-0.411744	0.00364169
101.856	0.962591	0.200318	4.80532	1.54501e-06	1.60361e-05	ENSG00000221829.10_FANCG	ENSG00000221829	FANCG	up	YES	NO	0.206766	0.158527	-0.432242	0.002155
118.493	-0.778603	0.162057	-4.80451	1.55133e-06	1.60911e-05	ENSG00000145022.4_TCTA	ENSG00000145022	TCTA	down	YES	NO	-0.458877	0.00103657	0.460042	0.00100256
64.0002	0.630127	0.131158	4.80434	1.55263e-06	1.60941e-05	ENSG00000204348.10_DXO	ENSG00000204348	DXO	up	YES	NO	0.310934	0.0314711	-0.2607	0.0735081
228.38	0.753653	0.156895	4.80356	1.5587e-06	1.61465e-05	ENSG00000105983.23_LMBR1	ENSG00000105983	LMBR1	up	YES	NO	0.281031	0.0530013	-0.215572	0.14115
286.276	-1.03186	0.214831	-4.80311	1.56218e-06	1.61721e-05	ENSG00000118640.11_VAMP8	ENSG00000118640	VAMP8	down	YES	NO	-0.317989	0.0276273	0.37561	0.00851817
188.161	0.5024	0.104645	4.80098	1.57894e-06	1.63349e-05	ENSG00000148606.13_POLR3A	ENSG00000148606	POLR3A	up	YES	NO	0.146264	0.321207	-0.37895	0.00790494
176.929	1.60994	0.335464	4.79912	1.59361e-06	1.64652e-05	ENSG00000157110.16_RBPMS	ENSG00000157110	RBPMS	up	YES	NO	0.315441	0.0289675	-0.28939	0.046041
658.547	-1.05139	0.219074	-4.79925	1.59259e-06	1.64652e-05	ENSG00000189067.14_LITAF	ENSG00000189067	LITAF	down	YES	NO	-0.206917	0.158215	0.373885	0.0088507
767.464	2.62866	0.547813	4.79847	1.59882e-06	1.65084e-05	ENSG00000185567.7_AHNAK2	ENSG00000185567	AHNAK2	up	YES	NO	0.291914	0.0440923	-0.208638	0.154708
19.7698	1.47092	0.306636	4.79697	1.61086e-06	1.66219e-05	ENSG00000162493.17_PDPN	ENSG00000162493	PDPN	up	YES	NO	0.338793	0.0184985	-0.383677	0.00710228
1854.79	-0.785414	0.163743	-4.79664	1.61353e-06	1.66386e-05	ENSG00000075426.12_FOSL2	ENSG00000075426	FOSL2	down	YES	NO	-0.234431	0.108756	0.305467	0.0347458
55.4354	0.998404	0.208157	4.7964	1.61544e-06	1.66475e-05	ENSG00000147400.10_CETN2	ENSG00000147400	CETN2	up	YES	NO	0.235567	0.107004	-0.238407	0.102718
167.171	-1.38923	0.289797	-4.7938	1.63648e-06	1.68425e-05	ENSG00000073711.11_PPP2R3A	ENSG00000073711	PPP2R3A	down	YES	NO	-0.426659	0.00249406	0.484313	0.000486688
18.4774	0.889141	0.185475	4.79387	1.63595e-06	1.68425e-05	ENSG00000133111.4_RFXAP	ENSG00000133111	RFXAP	up	YES	NO	0.286585	0.0482882	-0.128086	0.385618
203.139	0.873045	0.182155	4.79288	1.64406e-06	1.69096e-05	ENSG00000110108.10_TMEM109	ENSG00000110108	TMEM109	up	YES	NO	0.146566	0.320195	-0.304319	0.035468
29.0026	-1.36424	0.284661	-4.79252	1.64697e-06	1.69286e-05	ENSG00000256663.1_RP11-424C20.2	ENSG00000256663	RP11-424C20	down	YES	NO	-0.132234	0.370287	0.280144	0.0537873
24.7807	1.23859	0.258487	4.79171	1.65368e-06	1.69865e-05	ENSG00000245910.8_SNHG6	ENSG00000245910	SNHG6	up	YES	NO	0.25485	0.0804458	-0.226309	0.121928
108.086	1.38737	0.289599	4.79066	1.66233e-06	1.70644e-05	ENSG00000182621.18_PLCB1	ENSG00000182621	PLCB1	up	YES	NO	0.0983032	0.506227	-0.348003	0.0153599
381.039	-1.46489	0.305794	-4.79047	1.66393e-06	1.70697e-05	ENSG00000125845.7_BMP2	ENSG00000125845	BMP2	down	YES	NO	-0.319334	0.026941	0.414496	0.00340036
62.9008	1.36945	0.285896	4.79001	1.66775e-06	1.70979e-05	ENSG00000143217.9_NECTIN4	ENSG00000143217	NECTIN4	up	YES	NO	0.2002	0.172467	-0.381384	0.00748241
549.252	-1.02528	0.214057	-4.78978	1.66963e-06	1.71052e-05	ENSG00000108984.15_MAP2K6	ENSG00000108984	MAP2K6	down	YES	NO	-0.251292	0.0849113	0.499419	0.000301907
987.291	-1.04963	0.219146	-4.78966	1.67061e-06	1.71052e-05	ENSG00000198478.8_SH3BGRL2	ENSG00000198478	SH3BGRL2	down	YES	NO	-0.359847	0.0119996	0.4786	0.000579715
270.709	0.80858	0.168841	4.78901	1.67603e-06	1.71496e-05	ENSG00000178719.17_GRINA	ENSG00000178719	GRINA	up	YES	NO	0.342083	0.0173204	-0.464348	0.000885308
1523.73	-1.21815	0.254382	-4.78867	1.67892e-06	1.71681e-05	ENSG00000074416.15_MGLL	ENSG00000074416	MGLL	down	YES	NO	-0.335046	0.0199223	0.415478	0.00331763
149.43	-0.778721	0.162693	-4.78646	1.69752e-06	1.73472e-05	ENSG00000131871.15_SELENOS	ENSG00000131871	SELENOS	down	YES	NO	-0.35019	0.0146853	0.40422	0.00438012
62.2291	0.644143	0.13459	4.78595	1.70178e-06	1.73796e-05	ENSG00000112130.17_RNF8	ENSG00000112130	RNF8	up	YES	YES	0.325083	0.0241651	-0.344735	0.0164175
507.846	-2.15617	0.45058	-4.78531	1.70727e-06	1.74245e-05	ENSG00000134321.13_RSAD2	ENSG00000134321	RSAD2	down	YES	NO	-0.364079	0.0109625	0.378225	0.0080347
39.2143	1.3199	0.275925	4.78353	1.72242e-06	1.75678e-05	ENSG00000115657.14_ABCB6	ENSG00000115657	ABCB6	up	YES	NO	0.264426	0.0693422	-0.253931	0.081581
225.929	-0.854146	0.178603	-4.78238	1.73229e-06	1.76571e-05	ENSG00000141401.12_IMPA2	ENSG00000141401	IMPA2	down	YES	NO	-0.249101	0.0877555	0.386238	0.00669784
1746.16	-0.997354	0.208577	-4.78171	1.73813e-06	1.77053e-05	ENSG00000167470.13_MIDN	ENSG00000167470	MIDN	down	YES	NO	-0.208002	0.155996	0.323737	0.0247923
24.4567	1.76995	0.370269	4.78016	1.75158e-06	1.78195e-05	ENSG00000088002.12_SULT2B1	ENSG00000088002	SULT2B1	up	YES	NO	0.233722	0.10986	-0.318579	0.0273244
667.454	-1.02799	0.215049	-4.78024	1.75084e-06	1.78195e-05	ENSG00000213977.8_TAX1BP3	ENSG00000213977	TAX1BP3	down	YES	NO	-0.356762	0.0128077	0.37132	0.00936603
300.516	-0.878052	0.1837	-4.7798	1.75465e-06	1.78394e-05	ENSG00000130449.6_ZSWIM6	ENSG00000130449	ZSWIM6	down	YES	NO	-0.196965	0.17965	0.483201	0.000503655
530.134	-0.898828	0.188064	-4.77937	1.75844e-06	1.78664e-05	ENSG00000166900.17_STX3	ENSG00000166900	STX3	down	YES	NO	-0.309806	0.0321252	0.301345	0.0373969
793.862	-0.951487	0.199097	-4.77902	1.76154e-06	1.78815e-05	ENSG00000205213.14_LGR4	ENSG00000205213	LGR4	down	YES	NO	-0.326874	0.0233508	0.430254	0.00227074
452.107	1.15253	0.241212	4.77807	1.76988e-06	1.79483e-05	ENSG00000149639.15_SOGA1	ENSG00000149639	SOGA1	up	YES	NO	0.236146	0.106118	-0.451083	0.00129199
37.7503	1.06108	0.222126	4.77693	1.77994e-06	1.80388e-05	ENSG00000083635.8_NUFIP1	ENSG00000083635	NUFIP1	up	YES	NO	0.344689	0.0164326	-0.268817	0.0646758
735.093	0.615503	0.128877	4.7759	1.78902e-06	1.81077e-05	ENSG00000122515.15_ZMIZ2	ENSG00000122515	ZMIZ2	up	YES	NO	0.422404	0.00278324	-0.364777	0.0107989
56.8138	-1.7199	0.360115	-4.77597	1.78845e-06	1.81077e-05	ENSG00000240498.9_CDKN2B-AS1	ENSG00000240498	CDKN2B-AS1	down	YES	NO	-0.278796	0.0550001	0.397091	0.00519771
278.838	-1.8448	0.386288	-4.77571	1.79074e-06	1.81136e-05	ENSG00000171227.7_TMEM37	ENSG00000171227	TMEM37	down	YES	NO	-0.398558	0.00501933	0.392427	0.005802
116.056	0.607652	0.127298	4.77347	1.81079e-06	1.83047e-05	ENSG00000167625.11_ZNF526	ENSG00000167625	ZNF526	up	YES	NO	0.176607	0.229836	-0.346067	0.0159793
308.28	1.75611	0.367934	4.77289	1.81597e-06	1.83454e-05	ENSG00000163975.12_MELTF	ENSG00000163975	MELTF	up	YES	NO	0.26929	0.0641882	-0.366233	0.0104649
663.135	-1.21214	0.254003	-4.77214	1.82276e-06	1.84023e-05	ENSG00000136059.15_VILL	ENSG00000136059	VILL	down	YES	NO	-0.278113	0.0556229	0.400613	0.00477851
73.5728	1.03558	0.217033	4.77155	1.82816e-06	1.84101e-05	ENSG00000079462.8_PAFAH1B3	ENSG00000079462	PAFAH1B3	up	YES	NO	0.293083	0.0432126	-0.280245	0.0536978
14.5152	1.61165	0.337758	4.7716	1.82772e-06	1.84101e-05	ENSG00000113356.13_POLR3G	ENSG00000113356	POLR3G	up	YES	NO	0.305463	0.0347487	-0.322802	0.0252364
59.5845	0.938011	0.196576	4.77176	1.82624e-06	1.84101e-05	ENSG00000157796.18_WDR19	ENSG00000157796	WDR19	up	YES	NO	0.215056	0.142128	-0.264125	0.0696717
689.522	-0.852348	0.178631	-4.77156	1.82806e-06	1.84101e-05	ENSG00000166689.16_PLEKHA7	ENSG00000166689	PLEKHA7	down	YES	NO	-0.223634	0.126522	0.337134	0.019118
29.6298	1.50568	0.315696	4.76938	1.84794e-06	1.85976e-05	ENSG00000171877.21_FRMD5	ENSG00000171877	FRMD5	up	YES	NO	0.0981346	0.50696	-0.281585	0.0525155
15.5406	1.47922	0.3102	4.76861	1.85503e-06	1.86571e-05	ENSG00000227751.1_RCC2-AS1	ENSG00000227751	RCC2-AS1	up	YES	NO	0.323906	0.0247129	-0.334952	0.0199594
178.157	-1.23746	0.259512	-4.76842	1.85676e-06	1.86627e-05	ENSG00000155324.10_GRAMD2B	ENSG00000155324	GRAMD2B	down	YES	NO	-0.209498	0.152977	0.436805	0.00190893
147	-1.51818	0.318422	-4.76783	1.86223e-06	1.87058e-05	ENSG00000054277.14_OPN3	ENSG00000054277	OPN3	down	YES	NO	-0.311106	0.0313727	0.413995	0.00344318
663.009	-1.48987	0.312499	-4.76762	1.86419e-06	1.87136e-05	ENSG00000142875.19_PRKACB	ENSG00000142875	PRKACB	down	YES	NO	-0.387878	0.00644941	0.499588	0.000300258
54.6151	-1.33071	0.279267	-4.76502	1.88838e-06	1.89375e-05	ENSG00000129595.14_EPB41L4A	ENSG00000129595	EPB41L4A	down	YES	NO	-0.302157	0.0368622	0.468259	0.000789619
36.7906	1.39467	0.292693	4.76496	1.88887e-06	1.89375e-05	ENSG00000184903.10_IMMP2L	ENSG00000184903	IMMP2L	up	YES	NO	0.317984	0.02763	-0.358973	0.012224
188.236	0.818231	0.171743	4.76427	1.89542e-06	1.89913e-05	ENSG00000163811.12_WDR43	ENSG00000163811	WDR43	up	YES	NO	0.298142	0.0395703	-0.347772	0.0154328
391.971	-0.615001	0.129133	-4.76254	1.91171e-06	1.91423e-05	ENSG00000107521.20_HPS1	ENSG00000107521	HPS1	down	YES	NO	-0.099488	0.50109	0.274209	0.0592912
181.073	0.835447	0.175521	4.75981	1.93779e-06	1.93859e-05	ENSG00000131873.7_CHSY1	ENSG00000131873	CHSY1	up	YES	NO	0.324033	0.0246536	-0.484552	0.000483106
56.0932	0.819954	0.172269	4.75974	1.93847e-06	1.93859e-05	ENSG00000159714.12_ZDHHC1	ENSG00000159714	ZDHHC1	up	YES	NO	0.25097	0.0853248	-0.49005	0.000407013
17.4566	0.850358	0.178704	4.75847	1.95062e-06	1.94952e-05	ENSG00000118420.17_UBE3D	ENSG00000118420	UBE3D	up	YES	NO	0.142222	0.334902	-0.299759	0.0384605
1177.91	0.854229	0.179615	4.75588	1.9758e-06	1.97344e-05	ENSG00000181163.14_NPM1	ENSG00000181163	NPM1	up	YES	YES	0.32486	0.0242681	-0.324334	0.0245124
26.0837	0.994996	0.209229	4.75553	1.97926e-06	1.97565e-05	ENSG00000166171.13_DPCD	ENSG00000166171	DPCD	up	YES	NO	0.226295	0.121953	-0.264046	0.0697579
870.064	-0.943312	0.19845	-4.75339	2.00029e-06	1.9954e-05	ENSG00000137266.15_SLC22A23	ENSG00000137266	SLC22A23	down	YES	NO	-0.281075	0.0529628	0.401196	0.00471205
32.4511	-2.26595	0.476844	-4.75198	2.01439e-06	2.0082e-05	ENSG00000223573.7_TINCR	ENSG00000223573	TINCR	down	YES	NO	-0.354506	0.0134277	0.311914	0.0309123
621.655	-1.498	0.315247	-4.75182	2.0159e-06	2.00845e-05	ENSG00000185561.10_TLCD2	ENSG00000185561	TLCD2	down	YES	NO	-0.276659	0.0569671	0.410334	0.00377113
2023.04	-0.844587	0.177751	-4.7515	2.0191e-06	2.01038e-05	ENSG00000138771.16_SHROOM3	ENSG00000138771	SHROOM3	down	YES	NO	-0.347247	0.0155994	0.287614	0.0474543
743.518	0.842708	0.177393	4.75052	2.02898e-06	2.01895e-05	ENSG00000152558.15_TMEM123	ENSG00000152558	TMEM123	up	YES	NO	0.17675	0.229451	-0.286668	0.0482205
49.05	0.716013	0.150788	4.74846	2.04969e-06	2.03828e-05	ENSG00000125846.16_ZNF133	ENSG00000125846	ZNF133	up	YES	NO	0.252954	0.0828014	-0.245278	0.0928954
513.017	-1.81507	0.38235	-4.74714	2.06311e-06	2.04778e-05	ENSG00000085563.15_ABCB1	ENSG00000085563	ABCB1	down	YES	YES	-0.271957	0.0614947	0.293141	0.0431692
10.3271	1.46739	0.309104	4.74723	2.06224e-06	2.04778e-05	ENSG00000164932.13_CTHRC1	ENSG00000164932	CTHRC1	up	YES	NO	0.311954	0.0308897	-0.316353	0.028482
716.22	-0.58261	0.122792	-4.74468	2.08838e-06	2.07158e-05	ENSG00000112893.10_MAN2A1	ENSG00000112893	MAN2A1	down	YES	NO	-0.325395	0.0240214	0.462426	0.000936034
89.6449	1.02276	0.21563	4.74315	2.10423e-06	2.08599e-05	ENSG00000177045.10_SIX5	ENSG00000177045	SIX5	up	YES	NO	0.304741	0.0352014	-0.354937	0.0133073
229.388	-0.926268	0.195297	-4.74287	2.10708e-06	2.08752e-05	ENSG00000119899.13_SLC17A5	ENSG00000119899	SLC17A5	down	YES	NO	-0.45437	0.00117813	0.379386	0.00782767
15.9077	1.15381	0.24329	4.74253	2.11069e-06	2.0898e-05	ENSG00000181544.15_FANCB	ENSG00000181544	FANCB	up	YES	NO	0.404271	0.00437476	-0.274561	0.0589532
795.304	0.700351	0.147686	4.74215	2.11464e-06	2.09241e-05	ENSG00000189091.13_SF3B3	ENSG00000189091	SF3B3	up	YES	YES	0.263053	0.0708545	-0.309154	0.0325079
324.664	0.592574	0.124964	4.74197	2.11653e-06	2.09297e-05	ENSG00000139746.16_RBM26	ENSG00000139746	RBM26	up	YES	NO	0.376283	0.00839143	-0.251637	0.084469
475.295	1.39524	0.294259	4.74152	2.12117e-06	2.09626e-05	ENSG00000170525.21_PFKFB3	ENSG00000170525	PFKFB3	up	YES	NO	0.48606	0.00046106	-0.490402	0.000402541
27.9726	1.55471	0.328019	4.73969	2.14049e-06	2.11404e-05	ENSG00000171017.11_LRRC8E	ENSG00000171017	LRRC8E	up	YES	NO	0.330065	0.0219573	-0.358307	0.0123974
1115.17	-0.773612	0.163266	-4.73834	2.15473e-06	2.12451e-05	ENSG00000266412.6_NCOA4	ENSG00000266412	NCOA4	down	YES	NO	-0.409685	0.003832	0.438739	0.00181236
32.4636	1.6785	0.354225	4.73852	2.1528e-06	2.12451e-05	ENSG00000272114.1_RP1-261G23.7	ENSG00000272114	RP1-261G23	up	YES	NO	0.428688	0.00236571	-0.400281	0.00481673
31.7537	-1.49717	0.316017	-4.73762	2.16241e-06	2.13039e-05	ENSG00000271828.1_CTD-2310F14.1	ENSG00000271828	CTD-2310F14	down	YES	NO	-0.290523	0.0451575	0.439006	0.00179937
59.7704	0.666635	0.140725	4.73716	2.16738e-06	2.13397e-05	ENSG00000043514.17_TRIT1	ENSG00000043514	TRIT1	up	YES	NO	0.221492	0.130291	-0.274616	0.0589001
147.196	-0.655816	0.138449	-4.73687	2.17046e-06	2.13568e-05	ENSG00000114125.14_RNF7	ENSG00000114125	RNF7	down	YES	NO	-0.279655	0.0542247	0.395775	0.00536234
46.7591	1.09529	0.231236	4.73668	2.17251e-06	2.13637e-05	ENSG00000159259.8_CHAF1B	ENSG00000159259	CHAF1B	up	YES	YES	0.361067	0.0116923	-0.268928	0.0645608
417.167	0.728597	0.153958	4.73244	2.21842e-06	2.18017e-05	ENSG00000139641.13_ESYT1	ENSG00000139641	ESYT1	up	YES	NO	0.0862167	0.560117	-0.218489	0.135718
705.744	-0.734278	0.155164	-4.73226	2.22033e-06	2.18069e-05	ENSG00000096070.19_BRPF3	ENSG00000096070	BRPF3	down	YES	YES	-0.276214	0.0573839	0.359588	0.0120657
178.973	1.81737	0.38407	4.73186	2.22474e-06	2.18368e-05	ENSG00000151067.23_CACNA1C	ENSG00000151067	CACNA1C	up	YES	NO	0.117715	0.42555	-0.240236	0.100028
582.538	0.939646	0.198613	4.73103	2.23383e-06	2.19125e-05	ENSG00000196305.19_IARS1	ENSG00000196305	IARS1	up	YES	YES	0.193555	0.187455	-0.313445	0.0300552
226.714	0.81822	0.172965	4.73056	2.23898e-06	2.19494e-05	ENSG00000104907.13_TRMT1	ENSG00000104907	TRMT1	up	YES	NO	0.447655	0.00142112	-0.458076	0.00106055
670.952	-1.60781	0.339932	-4.7298	2.24738e-06	2.20182e-05	ENSG00000167741.11_GGT6	ENSG00000167741	GGT6	down	YES	NO	-0.401362	0.00469321	0.466013	0.000843384
113.393	0.84332	0.178305	4.72964	2.24922e-06	2.20227e-05	ENSG00000123374.11_CDK2	ENSG00000123374	CDK2	up	YES	YES	0.334092	0.0202993	-0.304689	0.0352343
30.1093	2.45164	0.518377	4.72945	2.25124e-06	2.20289e-05	ENSG00000226476.6_LINC01748	ENSG00000226476	LINC01748	up	YES	NO	0.229667	0.116343	-0.0835806	0.572217
907.955	-1.14606	0.242343	-4.7291	2.2552e-06	2.20541e-05	ENSG00000168528.12_SERINC2	ENSG00000168528	SERINC2	down	YES	NO	-0.324278	0.0245389	0.400569	0.00478347
457.978	-0.58707	0.124157	-4.72847	2.26221e-06	2.2109e-05	ENSG00000169641.13_LUZP1	ENSG00000169641	LUZP1	down	YES	NO	-0.351803	0.0142039	0.447779	0.00141626
129.276	0.801913	0.169621	4.72766	2.27117e-06	2.21829e-05	ENSG00000178105.11_DDX10	ENSG00000178105	DDX10	up	YES	NO	0.383952	0.00705789	-0.293964	0.0425591
1021.48	0.769464	0.162838	4.72535	2.29724e-06	2.24238e-05	ENSG00000119335.17_SET	ENSG00000119335	SET	up	YES	YES	0.271869	0.0615821	-0.291792	0.0441846
572.113	0.821207	0.173835	4.72406	2.31182e-06	2.2525e-05	ENSG00000100401.20_RANGAP1	ENSG00000100401	RANGAP1	up	YES	NO	0.315933	0.0287047	-0.462114	0.000944513
790.098	1.03657	0.219419	4.72415	2.31074e-06	2.2525e-05	ENSG00000137309.20_HMGA1	ENSG00000137309	HMGA1	up	YES	NO	0.275597	0.0579651	-0.299014	0.0389688
398.027	-0.979857	0.207419	-4.72406	2.31185e-06	2.2525e-05	ENSG00000164466.13_SFXN1	ENSG00000164466	SFXN1	down	YES	NO	-0.260386	0.0738681	0.317196	0.0280386
152.048	0.972373	0.205963	4.72112	2.34555e-06	2.28393e-05	ENSG00000231721.7_LINC-PINT	ENSG00000231721	LINC-PINT	up	YES	NO	0.340902	0.0177357	-0.337963	0.0188062
503.823	-1.40686	0.298104	-4.71935	2.36599e-06	2.30242e-05	ENSG00000114812.13_VIPR1	ENSG00000114812	VIPR1	down	YES	NO	-0.345538	0.0161521	0.431106	0.00222047
365.248	-0.843803	0.178836	-4.71832	2.37805e-06	2.31162e-05	ENSG00000138796.18_HADH	ENSG00000138796	HADH	down	YES	NO	-0.383627	0.00711051	0.522868	0.000137486
75.258	-1.42586	0.302197	-4.71829	2.37835e-06	2.31162e-05	ENSG00000158315.11_RHBDL2	ENSG00000158315	RHBDL2	down	YES	NO	-0.277709	0.0559937	0.38844	0.00636618
299.296	0.73088	0.154913	4.718	2.3818e-06	2.31215e-05	ENSG00000095319.14_NUP188	ENSG00000095319	NUP188	up	YES	NO	0.222743	0.12808	-0.337036	0.0191553
162.293	1.59597	0.338267	4.71806	2.38099e-06	2.31215e-05	ENSG00000102287.19_GABRE	ENSG00000102287	GABRE	up	YES	NO	0.45322	0.00121691	-0.34457	0.0164723
291.181	1.01665	0.215495	4.71776	2.38459e-06	2.31345e-05	ENSG00000184575.12_XPOT	ENSG00000184575	XPOT	up	YES	NO	0.318127	0.0275561	-0.338259	0.0186962
518.617	1.02872	0.218079	4.71717	2.39149e-06	2.31872e-05	ENSG00000059588.10_TARBP1	ENSG00000059588	TARBP1	up	YES	NO	0.170383	0.246938	-0.45075	0.00130407
338.919	1.08504	0.230055	4.71646	2.39985e-06	2.32541e-05	ENSG00000132953.17_XPO4	ENSG00000132953	XPO4	up	YES	NO	0.1788	0.22401	-0.258829	0.0756735
156.341	1.67216	0.354577	4.71594	2.40597e-06	2.32992e-05	ENSG00000204291.11_COL15A1	ENSG00000204291	COL15A1	up	YES	NO	0.256808	0.0780685	-0.271823	0.0616281
123.405	-0.596197	0.126455	-4.7147	2.42068e-06	2.34132e-05	ENSG00000002330.14_BAD	ENSG00000002330	BAD	down	YES	NO	-0.412964	0.00353291	0.347181	0.0156205
145.194	-1.15075	0.244071	-4.7148	2.41947e-06	2.34132e-05	ENSG00000150782.12_IL18	ENSG00000150782	IL18	down	YES	NO	-0.384879	0.00690991	0.407275	0.00406583
421.734	-0.942434	0.199952	-4.7133	2.43734e-06	2.35599e-05	ENSG00000003400.15_CASP10	ENSG00000003400	CASP10	down	YES	NO	-0.258094	0.0765384	0.309312	0.0324152
246.301	-0.637729	0.135317	-4.71284	2.44292e-06	2.35996e-05	ENSG00000166908.18_PIP4K2C	ENSG00000166908	PIP4K2C	down	YES	NO	-0.268903	0.0645867	0.367366	0.010211
1106.51	-1.19768	0.254142	-4.71265	2.44517e-06	2.36069e-05	ENSG00000162458.13_FBLIM1	ENSG00000162458	FBLIM1	down	YES	NO	-0.260131	0.0741622	0.368682	0.00992266
86.8955	0.788238	0.167315	4.7111	2.46381e-06	2.37724e-05	ENSG00000130713.16_EXOSC2	ENSG00000130713	EXOSC2	up	YES	YES	0.219657	0.133588	-0.376311	0.00838622
40.2623	-1.69501	0.359808	-4.71086	2.46676e-06	2.37865e-05	ENSG00000164270.18_HTR4	ENSG00000164270	HTR4	down	YES	NO	-0.298842	0.0390868	0.472525	0.000695934
498.211	1.41642	0.300736	4.70984	2.47906e-06	2.38906e-05	ENSG00000182580.3_EPHB3	ENSG00000182580	EPHB3	up	YES	NO	0.232035	0.112524	-0.193326	0.187987
437.521	-0.869759	0.184684	-4.70945	2.48382e-06	2.3922e-05	ENSG00000112033.14_PPARD	ENSG00000112033	PPARD	down	YES	NO	-0.284441	0.0500654	0.351458	0.0143057
2604.22	-0.854136	0.181377	-4.70917	2.48722e-06	2.39378e-05	ENSG00000013364.19_MVP	ENSG00000013364	MVP	down	YES	NO	-0.319162	0.0270276	0.353107	0.0138249
198.645	1.87377	0.397906	4.70907	2.48847e-06	2.39378e-05	ENSG00000057019.16_DCBLD2	ENSG00000057019	DCBLD2	up	YES	NO	0.14163	0.33694	-0.159853	0.27779
44.1712	1.12078	0.238028	4.70859	2.49438e-06	2.39801e-05	ENSG00000037042.9_TUBG2	ENSG00000037042	TUBG2	up	YES	NO	0.227184	0.120455	-0.418421	0.00308044
1791.94	-0.824588	0.175149	-4.70793	2.50242e-06	2.40429e-05	ENSG00000152234.16_ATP5F1A	ENSG00000152234	ATP5F1A	down	YES	NO	-0.392496	0.00579259	0.447955	0.00140938
46.5695	1.46913	0.312129	4.7068	2.51639e-06	2.41625e-05	ENSG00000262528.2_LA16c-349E10.1	ENSG00000262528	LA16c-349E10	up	YES	NO	0.182982	0.213182	-0.323059	0.0251136
66.8036	1.41669	0.301054	4.70576	2.52928e-06	2.42716e-05	ENSG00000186603.7_HPDL	ENSG00000186603	HPDL	up	YES	NO	0.0198917	0.893249	-0.278117	0.0556185
26.076	1.37591	0.292398	4.70561	2.53107e-06	2.42741e-05	ENSG00000188760.11_TMEM198	ENSG00000188760	TMEM198	up	YES	NO	0.290296	0.0453335	-0.281237	0.0528201
56.8605	1.23552	0.262581	4.70529	2.53509e-06	2.42981e-05	ENSG00000065328.17_MCM10	ENSG00000065328	MCM10	up	YES	NO	0.319341	0.0269372	-0.327911	0.0228904
203.473	-0.897434	0.190758	-4.70456	2.54409e-06	2.43696e-05	ENSG00000171522.6_PTGER4	ENSG00000171522	PTGER4	down	YES	NO	-0.242056	0.0974066	0.364025	0.0109752
3827.37	-1.21865	0.259066	-4.70401	2.55095e-06	2.44027e-05	ENSG00000176658.17_MYO1D	ENSG00000176658	MYO1D	down	YES	NO	-0.380672	0.0076039	0.46716	0.000815539
388.872	-1.10969	0.235908	-4.70392	2.55215e-06	2.44027e-05	ENSG00000186204.15_CYP4F12	ENSG00000186204	CYP4F12	down	YES	NO	-0.253989	0.0815095	0.353765	0.0136366
53.9677	1.38585	0.294609	4.70404	2.55065e-06	2.44027e-05	ENSG00000279569.1_RP11-394B2.1	ENSG00000279569	RP11-394B2	up	YES	NO	0.412823	0.00354535	-0.318871	0.0271755
73.2568	2.46905	0.52493	4.70358	2.55644e-06	2.44291e-05	ENSG00000154451.14_GBP5	ENSG00000154451	GBP5	up	YES	NO	0.259775	0.0745727	-0.102837	0.486717
62.7165	0.787619	0.167507	4.702	2.57631e-06	2.45894e-05	ENSG00000171453.20_POLR1C	ENSG00000171453	POLR1C	up	YES	NO	0.185914	0.205814	-0.348506	0.0152024
7.75072	1.45264	0.30894	4.70203	2.57587e-06	2.45894e-05	ENSG00000197696.10_NMB	ENSG00000197696	NMB	up	YES	NO	0.145238	0.324647	-0.310313	0.0318297
126.771	0.74865	0.15926	4.70081	2.59137e-06	2.47035e-05	ENSG00000169062.15_UPF3A	ENSG00000169062	UPF3A	up	YES	NO	0.283179	0.0511363	-0.247501	0.0898784
46.4969	1.08401	0.230623	4.70035	2.59718e-06	2.4744e-05	ENSG00000281571.2_CH17-195P21.2	ENSG00000281571	CH17-195P21	up	YES	NO	0.344785	0.0164008	-0.357393	0.0126386
40.376	2.13466	0.454164	4.70019	2.59919e-06	2.47483e-05	ENSG00000092758.18_COL9A3	ENSG00000092758	COL9A3	up	YES	NO	0.204011	0.164271	-0.184475	0.209407
32.05	-2.23949	0.476484	-4.70003	2.60125e-06	2.47531e-05	ENSG00000138356.14_AOX1	ENSG00000138356	AOX1	down	YES	NO	-0.407455	0.00404798	0.344085	0.0166348
288.504	-1.04983	0.223399	-4.69937	2.60971e-06	2.48187e-05	ENSG00000163541.12_SUCLG1	ENSG00000163541	SUCLG1	down	YES	NO	-0.322579	0.0253431	0.516498	0.000171207
148.497	1.23395	0.262604	4.69888	2.61588e-06	2.48626e-05	ENSG00000140534.14_TICRR	ENSG00000140534	TICRR	up	YES	NO	0.311007	0.0314293	-0.282923	0.0513558
245.706	-0.98887	0.210507	-4.69757	2.63275e-06	2.5008e-05	ENSG00000107738.20_VSIR	ENSG00000107738	VSIR	down	YES	NO	-0.366964	0.0103003	0.404865	0.00431201
24.7419	1.51434	0.322425	4.69671	2.64387e-06	2.50929e-05	ENSG00000115255.12_REEP6	ENSG00000115255	REEP6	up	YES	NO	0.193198	0.188286	-0.193464	0.187666
253.294	-1.09976	0.23416	-4.69663	2.64485e-06	2.50929e-05	ENSG00000172375.14_C2CD2L	ENSG00000172375	C2CD2L	down	YES	NO	-0.206979	0.158088	0.327883	0.0229026
278.397	1.20215	0.256018	4.69558	2.65855e-06	2.52078e-05	ENSG00000122966.17_CIT	ENSG00000122966	CIT	up	YES	YES	0.367195	0.0102488	-0.216974	0.138519
445.817	1.0416	0.221895	4.69411	2.67768e-06	2.53741e-05	ENSG00000165732.13_DDX21	ENSG00000165732	DDX21	up	YES	YES	0.326272	0.0236222	-0.311401	0.0312034
304.113	1.44175	0.307215	4.69295	2.69295e-06	2.55036e-05	ENSG00000204839.9_MROH6	ENSG00000204839	MROH6	up	YES	NO	0.382103	0.00736139	-0.441951	0.00166159
483.665	0.546396	0.116506	4.68985	2.73409e-06	2.58779e-05	ENSG00000087087.20_SRRT	ENSG00000087087	SRRT	up	YES	NO	0.449891	0.00133564	-0.305791	0.0345442
487.31	-1.36583	0.291363	-4.68775	2.76232e-06	2.61139e-05	ENSG00000119227.8_PIGZ	ENSG00000119227	PIGZ	down	YES	NO	-0.24663	0.091051	0.356105	0.0129855
341.382	0.58322	0.124413	4.68777	2.76194e-06	2.61139e-05	ENSG00000188976.11_NOC2L	ENSG00000188976	NOC2L	up	YES	YES	0.288145	0.0470278	-0.281305	0.0527603
38.6962	-1.17375	0.250492	-4.68577	2.78906e-06	2.63511e-05	ENSG00000275234.1_CTD-2396E7.11	ENSG00000275234	CTD-2396E7	down	YES	NO	-0.282594	0.0516387	0.394347	0.00554613
442.46	-0.702512	0.149933	-4.68551	2.79269e-06	2.63541e-05	ENSG00000154447.15_SH3RF1	ENSG00000154447	SH3RF1	down	YES	NO	-0.274755	0.0587669	0.361673	0.0115421
165.448	0.707496	0.150993	4.68562	2.79119e-06	2.63541e-05	ENSG00000170632.14_ARMC10	ENSG00000170632	ARMC10	up	YES	NO	0.204825	0.162558	-0.36864	0.00993174
111.097	1.09523	0.233765	4.68519	2.79706e-06	2.63797e-05	ENSG00000197182.14_MIRLET7BHG	ENSG00000197182	MIRLET7BHG	up	YES	NO	0.19946	0.17409	-0.217033	0.138409
80.3984	0.52784	0.112668	4.68492	2.80069e-06	2.63982e-05	ENSG00000143862.8_ARL8A	ENSG00000143862	ARL8A	up	YES	NO	0.375143	0.00860718	-0.482846	0.000509191
211.363	-1.5511	0.331168	-4.68372	2.81716e-06	2.65303e-05	ENSG00000137825.11_ITPKA	ENSG00000137825	ITPKA	down	YES	NO	-0.253375	0.0822746	0.30808	0.0331475
183.028	-1.20337	0.256936	-4.68353	2.81971e-06	2.65303e-05	ENSG00000196517.13_SLC6A9	ENSG00000196517	SLC6A9	down	YES	NO	-0.353075	0.013834	0.456627	0.00110523
869.724	0.974542	0.208078	4.68355	2.81955e-06	2.65303e-05	ENSG00000269821.1_KCNQ1OT1	ENSG00000269821	KCNQ1OT1	up	YES	NO	0.305356	0.0348154	-0.333495	0.0205382
15.4657	-1.19573	0.255343	-4.68284	2.82923e-06	2.66041e-05	ENSG00000171174.15_RBKS	ENSG00000171174	RBKS	down	YES	NO	-0.126187	0.392756	0.465989	0.000843958
267.6	0.755869	0.16142	4.68263	2.83218e-06	2.66161e-05	ENSG00000062822.15_POLD1	ENSG00000062822	POLD1	up	YES	NO	0.247407	0.090005	-0.419431	0.00300256
99.6175	-1.12142	0.239566	-4.68107	2.85388e-06	2.68042e-05	ENSG00000172086.9_KRCC1	ENSG00000172086	KRCC1	down	YES	NO	-0.298103	0.039597	0.410167	0.00378674
2101.1	0.73647	0.157347	4.68054	2.86114e-06	2.68566e-05	ENSG00000137818.12_RPLP1	ENSG00000137818	RPLP1	up	YES	NO	0.15735	0.28548	-0.408356	0.00395941
101.32	0.960517	0.205223	4.68035	2.86384e-06	2.68661e-05	ENSG00000225663.8_MCRIP1	ENSG00000225663	MCRIP1	up	YES	NO	0.205054	0.162079	-0.362894	0.0112448
287.807	-0.845762	0.180723	-4.67989	2.87027e-06	2.69104e-05	ENSG00000148154.10_UGCG	ENSG00000148154	UGCG	down	YES	NO	-0.256507	0.0784307	0.301544	0.0372653
220.963	0.94078	0.201081	4.6786	2.88837e-06	2.70642e-05	ENSG00000105855.10_ITGB8	ENSG00000105855	ITGB8	up	YES	NO	0.360771	0.0117661	-0.348811	0.0151078
104.288	2.12837	0.45502	4.67753	2.90346e-06	2.71896e-05	ENSG00000059804.16_SLC2A3	ENSG00000059804	SLC2A3	up	YES	NO	0.313583	0.029979	-0.204814	0.162581
891.124	-0.745119	0.159327	-4.67665	2.91599e-06	2.72813e-05	ENSG00000051009.11_FAM160A2	ENSG00000051009	FAM160A2	down	YES	NO	-0.212854	0.146355	0.361501	0.0115847
84.7419	1.11592	0.238619	4.67659	2.91684e-06	2.72813e-05	ENSG00000130304.17_SLC27A1	ENSG00000130304	SLC27A1	up	YES	NO	0.305035	0.0350163	-0.316673	0.0283131
11.1472	1.00593	0.215104	4.67648	2.9184e-06	2.72813e-05	ENSG00000135436.8_FAM186B	ENSG00000135436	FAM186B	up	YES	NO	0.153962	0.296113	-0.296483	0.0407356
815.108	1.63028	0.348744	4.67472	2.94349e-06	2.74663e-05	ENSG00000099194.6_SCD	ENSG00000099194	SCD	up	YES	NO	0.361683	0.0115398	-0.241143	0.0987146
849.881	-0.711974	0.152307	-4.67461	2.9451e-06	2.74663e-05	ENSG00000156052.11_GNAQ	ENSG00000156052	GNAQ	down	YES	NO	-0.374067	0.00881518	0.458634	0.00104379
22.3196	1.40453	0.300452	4.67472	2.94352e-06	2.74663e-05	ENSG00000167968.13_DNASE1L2	ENSG00000167968	DNASE1L2	up	YES	NO	0.477338	0.000602312	-0.323842	0.0247432
79.8923	-1.5675	0.335318	-4.67467	2.94432e-06	2.74663e-05	ENSG00000225335.3_XXbac-B476C20.9	ENSG00000225335	XXbac-B476C20	down	YES	NO	-0.301519	0.037282	0.461645	0.000957377
68.8491	0.827926	0.177135	4.67399	2.95401e-06	2.75332e-05	ENSG00000174010.9_KLHL15	ENSG00000174010	KLHL15	up	YES	NO	0.242294	0.0970671	-0.370931	0.00944636
131.812	1.27804	0.273461	4.67356	2.96019e-06	2.75747e-05	ENSG00000185201.17_IFITM2	ENSG00000185201	IFITM2	up	YES	NO	0.183249	0.212505	-0.206555	0.15896
103.174	-0.586875	0.125621	-4.67177	2.98612e-06	2.78e-05	ENSG00000125449.7_ARMC7	ENSG00000125449	ARMC7	down	YES	NO	-0.3413	0.0175949	0.315982	0.0286786
10.8651	-1.23697	0.264793	-4.67144	2.99091e-06	2.78282e-05	ENSG00000272264.1_RP11-92K15.3	ENSG00000272264	RP11-92K15	down	YES	NO	-0.192027	0.191029	0.465142	0.000865079
206.034	-0.849567	0.181952	-4.66919	3.02391e-06	2.81188e-05	ENSG00000182919.15_C11orf54	ENSG00000182919	C11orf54	down	YES	NO	-0.353793	0.0136287	0.385333	0.00683848
2251.46	-0.759761	0.162734	-4.66872	3.03081e-06	2.81665e-05	ENSG00000079805.19_DNM2	ENSG00000079805	DNM2	down	YES	NO	-0.262866	0.0710629	0.305844	0.0345117
308.588	-0.509749	0.109198	-4.6681	3.03991e-06	2.82346e-05	ENSG00000176087.16_SLC35A4	ENSG00000176087	SLC35A4	down	YES	NO	-0.374789	0.00867522	0.316575	0.0283647
159.814	1.66658	0.357157	4.66624	3.06758e-06	2.84749e-05	ENSG00000148735.15_PLEKHS1	ENSG00000148735	PLEKHS1	up	YES	NO	0.344396	0.0165307	-0.300994	0.0376302
21.7078	-1.95257	0.418546	-4.66512	3.08441e-06	2.86145e-05	ENSG00000256879.1_RP11-284H19.1	ENSG00000256879	RP11-284H19	down	YES	NO	-0.297837	0.0397826	0.423093	0.0027345
39.7747	-0.814649	0.174662	-4.66415	3.09895e-06	2.87326e-05	ENSG00000135617.4_PRADC1	ENSG00000135617	PRADC1	down	YES	NO	-0.316145	0.0285919	0.468314	0.000788357
20.2472	1.43007	0.306623	4.66394	3.10208e-06	2.87449e-05	ENSG00000176678.6_FOXL1	ENSG00000176678	FOXL1	up	YES	NO	0.306479	0.0341194	-0.348172	0.0153071
236.606	-2.00161	0.429188	-4.66372	3.10537e-06	2.87586e-05	ENSG00000135220.11_UGT2A3	ENSG00000135220	UGT2A3	down	YES	NO	-0.385549	0.00680468	0.502324	0.000274713
359.787	0.854036	0.183136	4.66339	3.11043e-06	2.87887e-05	ENSG00000112118.20_MCM3	ENSG00000112118	MCM3	up	YES	NO	0.225265	0.123706	-0.29514	0.0417
52.203	0.807899	0.173268	4.66271	3.12075e-06	2.88674e-05	ENSG00000142528.16_ZNF473	ENSG00000142528	ZNF473	up	YES	NO	0.210407	0.151161	-0.397137	0.00519195
1075.13	-0.723044	0.155082	-4.66234	3.12627e-06	2.88898e-05	ENSG00000134243.12_SORT1	ENSG00000134243	SORT1	down	YES	NO	-0.498146	0.000314574	0.433851	0.00206516
753.328	-0.789918	0.169458	-4.66144	3.13999e-06	2.89779e-05	ENSG00000151693.11_ASAP2	ENSG00000151693	ASAP2	down	YES	NO	-0.288389	0.0468333	0.357478	0.0126161
625.521	-0.852629	0.182922	-4.66115	3.14441e-06	2.90019e-05	ENSG00000126107.15_HECTD3	ENSG00000126107	HECTD3	down	YES	NO	-0.308841	0.0326936	0.410262	0.00377786
222.431	-0.71383	0.153219	-4.65888	3.17931e-06	2.93068e-05	ENSG00000175895.4_PLEKHF2	ENSG00000175895	PLEKHF2	down	YES	NO	-0.281633	0.052473	0.34409	0.0166331
36.0699	0.995383	0.213686	4.65815	3.19059e-06	2.93938e-05	ENSG00000132661.4_NXT1	ENSG00000132661	NXT1	up	YES	NO	0.198815	0.175517	-0.371997	0.00922764
137.845	1.1763	0.252547	4.65776	3.19671e-06	2.94331e-05	ENSG00000171368.12_TPPP	ENSG00000171368	TPPP	up	YES	NO	0.203779	0.164762	-0.300215	0.0381526
130.083	1.02529	0.220196	4.65625	3.22027e-06	2.96328e-05	ENSG00000135111.16_TBX3	ENSG00000135111	TBX3	up	YES	NO	0.477245	0.000604014	-0.351819	0.0141994
191.185	-0.678375	0.145776	-4.65356	3.26258e-06	3.00047e-05	ENSG00000187736.13_NHEJ1	ENSG00000187736	NHEJ1	down	YES	NO	-0.37749	0.00816804	0.480286	0.000550729
36.0565	-2.66857	0.573558	-4.65266	3.27677e-06	3.01179e-05	ENSG00000254645.2_RP11-396O20.2	ENSG00000254645	RP11-396O20	down	YES	NO	-0.306878	0.0338747	0.514032	0.000186165
51.8156	0.88011	0.189208	4.65154	3.29458e-06	3.02641e-05	ENSG00000213397.12_HAUS7	ENSG00000213397	HAUS7	up	YES	NO	0.177525	0.227383	-0.340805	0.01777
211.957	0.811038	0.174382	4.65094	3.30424e-06	3.03178e-05	ENSG00000093010.15_COMT	ENSG00000093010	COMT	up	YES	NO	0.203146	0.166106	-0.276286	0.0573157
25.1732	0.913794	0.196472	4.65102	3.30302e-06	3.03178e-05	ENSG00000243477.6_NAA80	ENSG00000243477	NAA80	up	YES	NO	0.431801	0.00218017	-0.380125	0.00769841
50.8764	1.34739	0.289741	4.65032	3.31417e-06	3.03914e-05	ENSG00000165480.16_SKA3	ENSG00000165480	SKA3	up	YES	NO	0.195492	0.182994	-0.259651	0.0747163
427.721	-0.697665	0.150038	-4.64992	3.32065e-06	3.04332e-05	ENSG00000170871.12_KIAA0232	ENSG00000170871	KIAA0232	down	YES	NO	-0.302443	0.036675	0.377337	0.00819609
204.629	0.629203	0.13532	4.64973	3.32376e-06	3.04442e-05	ENSG00000177830.18_CHID1	ENSG00000177830	CHID1	up	YES	NO	0.0646687	0.662339	-0.379526	0.00780299
15150.4	-1.08387	0.233161	-4.64856	3.34255e-06	3.05811e-05	ENSG00000170421.12_KRT8	ENSG00000170421	KRT8	down	YES	NO	-0.437599	0.00186875	0.38431	0.00700043
148.368	0.842629	0.181283	4.64815	3.3493e-06	3.06252e-05	ENSG00000125247.16_TMTC4	ENSG00000125247	TMTC4	up	YES	NO	0.218357	0.135961	-0.271795	0.0616558
917.468	-0.539647	0.116123	-4.64719	3.36488e-06	3.075e-05	ENSG00000150760.13_DOCK1	ENSG00000150760	DOCK1	down	YES	NO	-0.167464	0.255246	0.338328	0.0186705
79.0013	0.972804	0.209397	4.64574	3.38865e-06	3.09494e-05	ENSG00000170779.11_CDCA4	ENSG00000170779	CDCA4	up	YES	NO	0.147605	0.316742	-0.376157	0.00841508
62.8444	-1.28555	0.27676	-4.645	3.40071e-06	3.10417e-05	ENSG00000279693.1_RP11-71L14.3	ENSG00000279693	RP11-71L14	down	YES	NO	-0.176919	0.229002	0.481916	0.000523941
1189.1	-0.867614	0.186816	-4.64421	3.41378e-06	3.11431e-05	ENSG00000116133.13_DHCR24	ENSG00000116133	DHCR24	down	YES	NO	-0.329215	0.0223218	0.459312	0.00102374
627.03	-0.902975	0.19444	-4.64397	3.41776e-06	3.11536e-05	ENSG00000158985.14_CDC42SE2	ENSG00000158985	CDC42SE2	down	YES	NO	-0.290676	0.0450393	0.38885	0.00630601
328.417	-0.910429	0.196048	-4.64391	3.41885e-06	3.11536e-05	ENSG00000186314.12_PRELID2	ENSG00000186314	PRELID2	down	YES	NO	-0.305662	0.0346243	0.379855	0.00774537
13.2744	1.47925	0.318767	4.64055	3.4748e-06	3.16454e-05	ENSG00000255737.2_AGAP2-AS1	ENSG00000255737	AGAP2-AS1	up	YES	NO	0.313977	0.0297622	-0.346178	0.0159431
1011.32	-2.694	0.580572	-4.64024	3.47998e-06	3.16669e-05	ENSG00000071203.9_MS4A12	ENSG00000071203	MS4A12	down	YES	NO	-0.336799	0.0192451	0.540203	7.39899e-05
90.6442	0.956261	0.206083	4.64017	3.48115e-06	3.16669e-05	ENSG00000081059.20_TCF7	ENSG00000081059	TCF7	up	YES	NO	0.435275	0.00198848	-0.35643	0.0128973
113.397	0.558416	0.120372	4.63907	3.49981e-06	3.18185e-05	ENSG00000143811.19_PYCR2	ENSG00000143811	PYCR2	up	YES	NO	0.219698	0.133514	-0.433351	0.00209272
350.85	0.608733	0.131235	4.63849	3.50967e-06	3.18898e-05	ENSG00000144283.22_PKP4	ENSG00000144283	PKP4	up	YES	NO	0.217733	0.13711	-0.369382	0.00977234
204.116	-1.4251	0.307247	-4.63829	3.513e-06	3.19019e-05	ENSG00000241360.2_PDXP	ENSG00000241360	PDXP	down	YES	NO	-0.360446	0.011848	0.374065	0.00881557
96.0114	-1.75846	0.379186	-4.63747	3.527e-06	3.20107e-05	ENSG00000171916.17_LGALS9C	ENSG00000171916	LGALS9C	down	YES	NO	-0.402859	0.00452686	0.337178	0.0191015
19.6776	-1.37609	0.296787	-4.63664	3.54117e-06	3.2121e-05	ENSG00000170482.17_SLC23A1	ENSG00000170482	SLC23A1	down	YES	NO	-0.328301	0.0227188	0.502117	0.000276572
19.8182	1.37792	0.297324	4.63441	3.57952e-06	3.24319e-05	ENSG00000090971.5_NAT14	ENSG00000090971	NAT14	up	YES	NO	0.2215	0.130277	-0.290915	0.0448553
331.263	-0.864986	0.186641	-4.6345	3.57809e-06	3.24319e-05	ENSG00000137414.6_FAM8A1	ENSG00000137414	FAM8A1	down	YES	NO	-0.278481	0.0552864	0.425988	0.0025378
34.9712	1.28728	0.277842	4.63313	3.60171e-06	3.26144e-05	ENSG00000263590.2_LINC02591	ENSG00000263590	LINC02591	up	YES	NO	0.380772	0.00758664	-0.33079	0.0216509
505.89	-2.11447	0.456501	-4.6319	3.62317e-06	3.279e-05	ENSG00000198074.10_AKR1B10	ENSG00000198074	AKR1B10	down	YES	NO	-0.377652	0.0081386	0.494851	0.000349615
52.9501	0.748419	0.161611	4.631	3.63897e-06	3.29142e-05	ENSG00000272933.1_RP11-47A8.5	ENSG00000272933	RP11-47A8	up	YES	NO	0.398255	0.00505574	-0.412138	0.00360626
252.256	0.867077	0.187245	4.6307	3.64424e-06	3.29432e-05	ENSG00000125520.14_SLC2A4RG	ENSG00000125520	SLC2A4RG	up	YES	NO	0.196753	0.18013	-0.439432	0.00177882
68.0457	0.770863	0.166497	4.62989	3.65867e-06	3.30361e-05	ENSG00000133316.16_WDR74	ENSG00000133316	WDR74	up	YES	NO	0.296147	0.040975	-0.285471	0.0492057
210.358	1.02312	0.220976	4.63	3.65666e-06	3.30361e-05	ENSG00000196497.17_IPO4	ENSG00000196497	IPO4	up	YES	NO	0.375529	0.00853359	-0.297385	0.0400983
655.294	1.15683	0.249872	4.62968	3.66231e-06	3.30502e-05	ENSG00000110651.12_CD81	ENSG00000110651	CD81	up	YES	NO	0.220975	0.131214	-0.301256	0.0374563
681.067	0.664016	0.143488	4.62767	3.69808e-06	3.3354e-05	ENSG00000151208.17_DLG5	ENSG00000151208	DLG5	up	YES	NO	0.366383	0.0104308	-0.454201	0.00118375
147.117	0.804578	0.173895	4.62681	3.71344e-06	3.34736e-05	ENSG00000198131.14_ZNF544	ENSG00000198131	ZNF544	up	YES	NO	0.155601	0.290936	-0.409795	0.00382163
33.7728	-0.917539	0.198322	-4.62651	3.71876e-06	3.35025e-05	ENSG00000226742.4_HSBP1L1	ENSG00000226742	HSBP1L1	down	YES	NO	-0.091362	0.53685	0.338803	0.0184948
14.2218	1.5433	0.333589	4.62637	3.72135e-06	3.35069e-05	ENSG00000131019.11_ULBP3	ENSG00000131019	ULBP3	up	YES	NO	0.0679544	0.64629	-0.249232	0.0875829
322.16	-0.661463	0.143026	-4.62479	3.74986e-06	3.37445e-05	ENSG00000165406.16_MARCHF8	ENSG00000165406	MARCHF8	down	YES	NO	-0.28457	0.0499571	0.320967	0.0261264
40.9986	0.993959	0.215019	4.62266	3.78857e-06	3.40736e-05	ENSG00000112029.10_FBXO5	ENSG00000112029	FBXO5	up	YES	NO	0.251973	0.0840412	-0.318379	0.0274267
359.667	-1.09368	0.23663	-4.62188	3.80286e-06	3.41828e-05	ENSG00000010438.17_PRSS3	ENSG00000010438	PRSS3	down	YES	NO	-0.366393	0.0104287	0.392706	0.00576417
69.0589	-0.828205	0.179206	-4.62154	3.8091e-06	3.42195e-05	ENSG00000162927.14_PUS10	ENSG00000162927	PUS10	down	YES	NO	-0.157625	0.284628	0.359644	0.0120514
146.388	1.22088	0.264209	4.62088	3.82107e-06	3.43077e-05	ENSG00000185989.11_RASA3	ENSG00000185989	RASA3	up	YES	NO	0.272215	0.0612391	-0.303718	0.0358515
117.498	-1.03285	0.223547	-4.62026	3.83256e-06	3.43914e-05	ENSG00000235863.4_B3GALT4	ENSG00000235863	B3GALT4	down	YES	NO	-0.369085	0.00983576	0.367916	0.0100896
107.464	-1.18856	0.257258	-4.62011	3.83531e-06	3.43966e-05	ENSG00000107537.14_PHYH	ENSG00000107537	PHYH	down	YES	NO	-0.333153	0.0206762	0.43836	0.00183094
110.103	-0.99881	0.216194	-4.61998	3.83778e-06	3.43994e-05	ENSG00000140471.17_LINS1	ENSG00000140471	LINS1	down	YES	NO	-0.256198	0.0788034	0.33934	0.018298
330.816	0.610342	0.132115	4.61978	3.84156e-06	3.44139e-05	ENSG00000100941.9_PNN	ENSG00000100941	PNN	up	YES	NO	0.386277	0.00669179	-0.317742	0.027755
25.127	1.32901	0.287737	4.61885	3.85866e-06	3.45476e-05	ENSG00000235568.7_NFAM1	ENSG00000235568	NFAM1	up	YES	NO	0.317214	0.0280292	-0.301445	0.0373307
637.349	-0.623852	0.135086	-4.61819	3.87109e-06	3.46221e-05	ENSG00000160218.13_TRAPPC10	ENSG00000160218	TRAPPC10	down	YES	NO	-0.342284	0.0172505	0.327737	0.022967
166.097	-1.27048	0.275105	-4.61817	3.87133e-06	3.46221e-05	ENSG00000172159.16_FRMD3	ENSG00000172159	FRMD3	down	YES	NO	-0.344307	0.0165602	0.279073	0.0547484
416.155	-1.28228	0.277693	-4.61763	3.88155e-06	3.46744e-05	ENSG00000185112.6_FAM43A	ENSG00000185112	FAM43A	down	YES	NO	-0.316351	0.0284831	0.275373	0.0581778
247.706	-1.10237	0.238724	-4.61774	3.8794e-06	3.46744e-05	ENSG00000204219.11_TCEA3	ENSG00000204219	TCEA3	down	YES	NO	-0.394688	0.00550178	0.443421	0.00159638
206.944	0.982369	0.212846	4.61541	3.92329e-06	3.50277e-05	ENSG00000276043.5_UHRF1	ENSG00000276043	UHRF1	up	YES	NO	0.39284	0.00574608	-0.378066	0.00806337
250.288	-2.55865	0.554511	-4.61425	3.94514e-06	3.52029e-05	ENSG00000166828.3_SCNN1G	ENSG00000166828	SCNN1G	down	YES	NO	-0.350291	0.0146549	0.380421	0.00764719
124.396	3.06557	0.664425	4.61387	3.95246e-06	3.52485e-05	ENSG00000268104.3_SLC6A14	ENSG00000268104	SLC6A14	up	YES	NO	0.366536	0.0103964	-0.404279	0.00437388
120.793	-0.721566	0.156445	-4.61226	3.98315e-06	3.55023e-05	ENSG00000107864.15_CPEB3	ENSG00000107864	CPEB3	down	YES	NO	-0.207382	0.157262	0.462932	0.000922432
58.4233	0.898706	0.194859	4.61209	3.98639e-06	3.55113e-05	ENSG00000236144.8_TMEM147-AS1	ENSG00000236144	TMEM147-AS1	up	YES	NO	0.263465	0.0703985	-0.220283	0.132456
116.831	0.813565	0.176406	4.61188	3.99042e-06	3.55273e-05	ENSG00000101391.21_CDK5RAP1	ENSG00000101391	CDK5RAP1	up	YES	NO	0.188754	0.198847	-0.376435	0.00836297
19.5788	-1.45613	0.315863	-4.61001	4.0264e-06	3.58275e-05	ENSG00000110848.8_CD69	ENSG00000110848	CD69	down	YES	NO	-0.117346	0.427013	0.368683	0.00992244
146.485	0.532585	0.115546	4.60927	4.04077e-06	3.59353e-05	ENSG00000198917.13_SPOUT1	ENSG00000198917	SPOUT1	up	YES	NO	0.220762	0.131595	-0.350188	0.014686
301.779	0.510249	0.110722	4.60836	4.05849e-06	3.60727e-05	ENSG00000113649.13_TCERG1	ENSG00000113649	TCERG1	up	YES	NO	0.357214	0.0126864	-0.358447	0.0123607
26.3153	1.48917	0.323334	4.60567	4.11144e-06	3.65229e-05	ENSG00000151617.17_EDNRA	ENSG00000151617	EDNRA	up	YES	NO	0.36676	0.010346	-0.248365	0.088727
155.28	1.26101	0.273912	4.60369	4.15062e-06	3.68504e-05	ENSG00000163995.21_ABLIM2	ENSG00000163995	ABLIM2	up	YES	NO	0.204143	0.163993	-0.345173	0.0162722
341.025	0.627539	0.136366	4.60187	4.18724e-06	3.71548e-05	ENSG00000103275.21_UBE2I	ENSG00000103275	UBE2I	up	YES	NO	0.220764	0.131592	-0.259063	0.0754001
719.355	0.626002	0.136059	4.60097	4.20523e-06	3.72936e-05	ENSG00000005810.19_MYCBP2	ENSG00000005810	MYCBP2	up	YES	NO	0.324046	0.0246472	-0.287848	0.047266
145.772	-0.831581	0.180782	-4.59991	4.22665e-06	3.74626e-05	ENSG00000143891.17_GALM	ENSG00000143891	GALM	down	YES	NO	-0.386704	0.00662652	0.522713	0.000138229
839.168	-1.4726	0.320158	-4.59961	4.23277e-06	3.7496e-05	ENSG00000172828.13_CES3	ENSG00000172828	CES3	down	YES	NO	-0.251941	0.0840817	0.368883	0.00987922
38.7297	-1.26011	0.27419	-4.59576	4.31169e-06	3.81739e-05	ENSG00000173212.5_MAB21L3	ENSG00000173212	MAB21L3	down	YES	NO	-0.335073	0.0199119	0.260703	0.0735054
103.57	1.97515	0.42981	4.5954	4.31922e-06	3.81986e-05	ENSG00000182272.12_B4GALNT4	ENSG00000182272	B4GALNT4	up	YES	NO	0.0358411	0.808899	-0.259972	0.0743451
118.444	1.43923	0.313189	4.5954	4.3193e-06	3.81986e-05	ENSG00000182492.16_BGN	ENSG00000182492	BGN	up	YES	NO	0.23446	0.108711	-0.307864	0.0332771
18.561	2.06597	0.44987	4.59238	4.3822e-06	3.87334e-05	ENSG00000198835.4_GJC2	ENSG00000198835	GJC2	up	YES	NO	0.226249	0.12203	-0.263497	0.0703626
155.559	-0.961276	0.209329	-4.59218	4.38631e-06	3.87482e-05	ENSG00000151692.15_RNF144A	ENSG00000151692	RNF144A	down	YES	NO	-0.240623	0.0994667	0.388057	0.00642291
18.9436	1.55613	0.338957	4.59093	4.41265e-06	3.89592e-05	ENSG00000236790.6_LINC00299	ENSG00000236790	LINC00299	up	YES	NO	0.240792	0.0992217	-0.289917	0.0456287
94.299	0.571312	0.124464	4.59019	4.42849e-06	3.90773e-05	ENSG00000139370.12_SLC15A4	ENSG00000139370	SLC15A4	up	YES	NO	0.381251	0.007505	-0.483688	0.000496168
362.839	-0.587759	0.128062	-4.58966	4.43976e-06	3.91137e-05	ENSG00000108669.16_CYTH1	ENSG00000108669	CYTH1	down	YES	NO	-0.249054	0.0878172	0.203044	0.166323
438.106	-0.674816	0.147034	-4.58953	4.44244e-06	3.91137e-05	ENSG00000172661.19_WASHC2C	ENSG00000172661	WASHC2C	down	YES	NO	-0.246128	0.0917328	0.358224	0.0124189
111.462	0.653499	0.142383	4.58973	4.43823e-06	3.91137e-05	ENSG00000227057.10_WDR46	ENSG00000227057	WDR46	up	YES	NO	0.178444	0.224948	-0.332463	0.0209568
501.744	-1.25648	0.273839	-4.58839	4.4668e-06	3.93064e-05	ENSG00000223572.10_CKMT1A	ENSG00000223572	CKMT1A	down	YES	NO	-0.350888	0.0144753	0.374286	0.00877244
167.087	0.646172	0.140835	4.58813	4.47225e-06	3.93326e-05	ENSG00000125450.11_NUP85	ENSG00000125450	NUP85	up	YES	NO	0.280864	0.0531489	-0.327959	0.0228692
56.4579	-1.8094	0.394471	-4.58691	4.4986e-06	3.95424e-05	ENSG00000072657.10_TRHDE	ENSG00000072657	TRHDE	down	YES	NO	-0.4882	0.000431312	0.419591	0.00299039
94.2328	0.76335	0.166445	4.58618	4.5142e-06	3.9648e-05	ENSG00000126453.10_BCL2L12	ENSG00000126453	BCL2L12	up	YES	NO	0.227033	0.120708	-0.360824	0.011753
805.157	-0.623814	0.136024	-4.58607	4.51667e-06	3.9648e-05	ENSG00000165527.7_ARF6	ENSG00000165527	ARF6	down	YES	NO	-0.278662	0.0551217	0.36628	0.0104541
93.552	1.40412	0.306174	4.586	4.51809e-06	3.9648e-05	ENSG00000228492.2_RAB11FIP1P1	ENSG00000228492	RAB11FIP1P1	up	YES	NO	0.215442	0.141396	-0.389594	0.0061982
185.528	-1.7737	0.386848	-4.58501	4.53964e-06	3.97932e-05	ENSG00000214814.7_FER1L6	ENSG00000214814	FER1L6	down	YES	NO	-0.407768	0.00401705	0.26183	0.0722249
100.361	-1.31833	0.287556	-4.5846	4.54852e-06	3.98271e-05	ENSG00000188993.4_LRRC66	ENSG00000188993	LRRC66	down	YES	NO	-0.342575	0.0171497	0.449773	0.00134004
359.832	-0.757117	0.16514	-4.58469	4.54654e-06	3.98271e-05	ENSG00000206527.10_HACD2	ENSG00000206527	HACD2	down	YES	NO	-0.290097	0.0454883	0.458915	0.00103546
16.8271	0.974394	0.21255	4.58431	4.55491e-06	3.98392e-05	ENSG00000023608.5_SNAPC1	ENSG00000023608	SNAPC1	up	YES	NO	0.367969	0.0100779	-0.198505	0.176205
75.211	0.6916	0.15086	4.58439	4.55321e-06	3.98392e-05	ENSG00000147099.21_HDAC8	ENSG00000147099	HDAC8	up	YES	YES	0.201156	0.170383	-0.157396	0.285339
1216.39	-0.956936	0.208847	-4.582	4.60541e-06	4.02587e-05	ENSG00000076356.7_PLXNA2	ENSG00000076356	PLXNA2	down	YES	NO	-0.296557	0.0406832	0.381696	0.00742971
31.1863	1.49521	0.326353	4.58158	4.61479e-06	4.03186e-05	ENSG00000060558.4_GNA15	ENSG00000060558	GNA15	up	YES	NO	0.427258	0.00245551	-0.359838	0.0120018
1353.45	0.766284	0.167272	4.58107	4.62596e-06	4.03939e-05	ENSG00000168264.11_IRF2BP2	ENSG00000168264	IRF2BP2	up	YES	NO	0.269361	0.0641153	-0.421907	0.0028189
1817.35	-1.13736	0.248361	-4.57947	4.66162e-06	4.06716e-05	ENSG00000074370.18_ATP2A3	ENSG00000074370	ATP2A3	down	YES	NO	-0.27122	0.0622297	0.364493	0.0108653
126.152	0.907853	0.198247	4.57941	4.66288e-06	4.06716e-05	ENSG00000167088.11_SNRPD1	ENSG00000167088	SNRPD1	up	YES	NO	0.384654	0.00694566	-0.341703	0.0174529
85.2814	0.663751	0.144958	4.57891	4.67416e-06	4.07477e-05	ENSG00000104375.17_STK3	ENSG00000104375	STK3	up	YES	NO	0.373665	0.00889394	-0.411067	0.00370336
214.255	-1.58678	0.346816	-4.57528	4.75583e-06	4.14325e-05	ENSG00000153303.17_FRMD1	ENSG00000153303	FRMD1	down	YES	NO	-0.325617	0.02392	0.48304	0.000506155
80.8361	0.784528	0.171474	4.57519	4.75793e-06	4.14325e-05	ENSG00000166261.11_ZNF202	ENSG00000166261	ZNF202	up	YES	NO	0.3741	0.00880877	-0.270862	0.0625897
50.3829	1.56548	0.342399	4.57208	4.82896e-06	4.20281e-05	ENSG00000262001.1_DLGAP1-AS2	ENSG00000262001	DLGAP1-AS2	up	YES	NO	0.238926	0.10195	-0.259796	0.0745488
308.477	1.03016	0.225346	4.57144	4.84392e-06	4.21352e-05	ENSG00000116852.15_KIF21B	ENSG00000116852	KIF21B	up	YES	NO	0.392156	0.00583891	-0.411194	0.00369172
575.081	0.578611	0.12659	4.57073	4.8602e-06	4.22538e-05	ENSG00000060138.13_YBX3	ENSG00000060138	YBX3	up	YES	NO	0.320222	0.0264957	-0.36134	0.0116245
309.442	1.05701	0.231354	4.5688	4.90519e-06	4.26216e-05	ENSG00000187741.15_FANCA	ENSG00000187741	FANCA	up	YES	NO	0.403385	0.00446968	-0.288832	0.0464814
37.7304	0.989973	0.216786	4.5666	4.9571e-06	4.30491e-05	ENSG00000205084.11_TMEM231	ENSG00000205084	TMEM231	up	YES	NO	0.157099	0.286261	-0.182468	0.214494
176.203	0.940301	0.205918	4.56638	4.96209e-06	4.30689e-05	ENSG00000111602.12_TIMELESS	ENSG00000111602	TIMELESS	up	YES	NO	0.329296	0.0222866	-0.417716	0.00313588
428.397	0.613717	0.134426	4.56547	4.98378e-06	4.32336e-05	ENSG00000157933.10_SKI	ENSG00000157933	SKI	up	YES	NO	0.313704	0.0299121	-0.344095	0.0166315
361.12	-1.5845	0.34708	-4.56523	4.98954e-06	4.32364e-05	ENSG00000134326.12_CMPK2	ENSG00000134326	CMPK2	down	YES	NO	-0.334818	0.0200121	0.249287	0.0875106
104.163	-1.07221	0.234864	-4.56524	4.98933e-06	4.32364e-05	ENSG00000233006.8_MIR3936HG	ENSG00000233006	MIR3936HG	down	YES	NO	-0.222073	0.12926	0.342157	0.0172945
84.4634	-0.798375	0.174904	-4.56465	5.00326e-06	4.33132e-05	ENSG00000123595.8_RAB9A	ENSG00000123595	RAB9A	down	YES	NO	-0.159527	0.278783	0.40179	0.00464512
34.4972	1.415	0.310002	4.56448	5.00739e-06	4.33155e-05	ENSG00000128165.9_ADM2	ENSG00000128165	ADM2	up	YES	NO	0.404528	0.00434753	-0.380837	0.00757564
234.159	-0.654761	0.14345	-4.56439	5.00957e-06	4.33155e-05	ENSG00000140157.16_NIPA2	ENSG00000140157	NIPA2	down	YES	NO	-0.350982	0.0144473	0.36157	0.0115675
140.711	-0.937575	0.205416	-4.56426	5.01249e-06	4.33172e-05	ENSG00000114166.8_KAT2B	ENSG00000114166	KAT2B	down	YES	YES	-0.284188	0.0502791	0.417808	0.00312863
650.859	-0.735949	0.161272	-4.5634	5.0331e-06	4.34716e-05	ENSG00000157600.12_TMEM164	ENSG00000157600	TMEM164	down	YES	NO	-0.496683	0.000329715	0.341344	0.0175792
215.924	0.787258	0.172576	4.56181	5.07156e-06	4.37801e-05	ENSG00000175115.13_PACS1	ENSG00000175115	PACS1	up	YES	NO	0.334117	0.0202893	-0.420405	0.00292909
310.556	-1.53488	0.336481	-4.56156	5.0775e-06	4.38076e-05	ENSG00000188833.10_ENTPD8	ENSG00000188833	ENTPD8	down	YES	NO	-0.311621	0.0310782	0.36343	0.0111162
134.688	0.884065	0.193838	4.56084	5.09493e-06	4.39341e-05	ENSG00000197283.18_SYNGAP1	ENSG00000197283	SYNGAP1	up	YES	NO	0.295132	0.0417056	-0.213073	0.14593
201.847	1.07527	0.235777	4.56053	5.10236e-06	4.39744e-05	ENSG00000135446.17_CDK4	ENSG00000135446	CDK4	up	YES	NO	0.345214	0.0162586	-0.32687	0.023353
94.6917	-0.75996	0.16667	-4.55966	5.12369e-06	4.41342e-05	ENSG00000126106.14_TMEM53	ENSG00000126106	TMEM53	down	YES	NO	-0.383662	0.00710475	0.387603	0.00649056
132.105	0.723339	0.158681	4.55846	5.15299e-06	4.43385e-05	ENSG00000063587.15_ZNF275	ENSG00000063587	ZNF275	up	YES	NO	0.392655	0.0057711	-0.279822	0.0540748
255.327	1.33389	0.292849	4.55488	5.24147e-06	4.50511e-05	ENSG00000114346.14_ECT2	ENSG00000114346	ECT2	up	YES	NO	0.273274	0.0601979	-0.178952	0.22361
30.326	2.6819	0.588794	4.5549	5.24102e-06	4.50511e-05	ENSG00000260220.7_CCDC187	ENSG00000260220	CCDC187	up	YES	NO	0.179166	0.223046	-0.491153	0.000393132
869.526	0.744066	0.163368	4.55453	5.25022e-06	4.5102e-05	ENSG00000084207.18_GSTP1	ENSG00000084207	GSTP1	up	YES	NO	0.309647	0.0322183	-0.287586	0.0474765
325.653	-1.18131	0.259382	-4.5543	5.25594e-06	4.51267e-05	ENSG00000163412.13_EIF4E3	ENSG00000163412	EIF4E3	down	YES	NO	-0.346903	0.0157094	0.475022	0.000645854
115.684	0.542806	0.119189	4.55417	5.25937e-06	4.51318e-05	ENSG00000141562.18_NARF	ENSG00000141562	NARF	up	YES	NO	0.317583	0.0278374	-0.265128	0.0685791
59.1419	-1.11887	0.245724	-4.55339	5.27893e-06	4.52742e-05	ENSG00000107282.8_APBA1	ENSG00000107282	APBA1	down	YES	NO	-0.266831	0.0667537	0.380094	0.00770372
298.213	1.1077	0.243275	4.55328	5.28166e-06	4.52742e-05	ENSG00000186184.19_POLR1D	ENSG00000186184	POLR1D	up	YES	NO	0.212285	0.147461	-0.285704	0.0490128
36.288	-1.23983	0.27245	-4.55069	5.34695e-06	4.58092e-05	ENSG00000154263.17_ABCA10	ENSG00000154263	ABCA10	down	YES	NO	-0.231152	0.113936	0.438975	0.00180087
102.189	1.4318	0.314676	4.55008	5.36265e-06	4.5919e-05	ENSG00000198853.12_RUSC2	ENSG00000198853	RUSC2	up	YES	NO	0.271396	0.0620533	-0.335395	0.0197862
165.315	-0.68079	0.149639	-4.54956	5.37594e-06	4.59991e-05	ENSG00000177105.10_RHOG	ENSG00000177105	RHOG	down	YES	NO	-0.303534	0.0359696	0.37213	0.00920057
20.531	-1.26055	0.277075	-4.54948	5.3778e-06	4.59991e-05	ENSG00000266903.2_CEACAM16-AS1	ENSG00000266903	CEACAM16-AS1	down	YES	NO	-0.162128	0.270919	0.464212	0.000888802
640.797	-0.660042	0.145122	-4.5482	5.41076e-06	4.62562e-05	ENSG00000176393.11_RNPEP	ENSG00000176393	RNPEP	down	YES	NO	-0.335945	0.0195725	0.379214	0.00785799
348.75	0.791732	0.174081	4.54806	5.41426e-06	4.62564e-05	ENSG00000106105.15_GARS1	ENSG00000106105	GARS1	up	YES	NO	0.266825	0.0667606	-0.245582	0.0924777
422.816	-0.992833	0.218302	-4.54797	5.41661e-06	4.62564e-05	ENSG00000158828.8_PINK1	ENSG00000158828	PINK1	down	YES	NO	-0.301433	0.0373389	0.383982	0.00705314
58.5596	1.2567	0.276381	4.54697	5.44234e-06	4.64512e-05	ENSG00000054967.13_RELT	ENSG00000054967	RELT	up	YES	NO	0.365888	0.0105431	-0.428422	0.0023822
287.951	-0.939037	0.206584	-4.54555	5.47913e-06	4.67402e-05	ENSG00000070778.13_PTPN21	ENSG00000070778	PTPN21	down	YES	NO	-0.341149	0.0176481	0.340551	0.0178608
14.7708	1.10022	0.242112	4.54427	5.51264e-06	4.70008e-05	ENSG00000089505.18_CMTM1	ENSG00000089505	CMTM1	up	YES	NO	0.266132	0.0674978	-0.305807	0.0345348
48.4419	2.12408	0.467521	4.54329	5.53837e-06	4.71948e-05	ENSG00000198203.10_SULT1C2	ENSG00000198203	SULT1C2	up	YES	NO	0.352373	0.0140373	-0.378276	0.00802556
49.3732	-0.929862	0.204705	-4.54245	5.56045e-06	4.73577e-05	ENSG00000257298.1_RP3-405J10.3	ENSG00000257298	RP3-405J10	down	YES	NO	-0.278321	0.0554322	0.492516	0.000376557
37.8528	-0.66446	0.146289	-4.5421	5.56965e-06	4.74106e-05	ENSG00000127720.8_METTL25	ENSG00000127720	METTL25	down	YES	NO	-0.322307	0.0254737	0.411761	0.00364021
339.47	-1.1751	0.258721	-4.54197	5.57306e-06	4.74143e-05	ENSG00000183317.17_EPHA10	ENSG00000183317	EPHA10	down	YES	NO	-0.243742	0.0950253	0.294501	0.0421655
293.237	-1.46424	0.322428	-4.54131	5.59068e-06	4.75387e-05	ENSG00000109819.9_PPARGC1A	ENSG00000109819	PPARGC1A	down	YES	YES	-0.237623	0.103887	0.425521	0.00256865
36.8908	1.25603	0.276593	4.54107	5.59697e-06	4.75668e-05	ENSG00000198933.9_TBKBP1	ENSG00000198933	TBKBP1	up	YES	NO	0.219643	0.133614	-0.15993	0.277556
381.404	-1.08349	0.238657	-4.53993	5.62729e-06	4.77989e-05	ENSG00000151229.13_SLC2A13	ENSG00000151229	SLC2A13	down	YES	NO	-0.220929	0.131297	0.429647	0.00230711
126.818	1.05885	0.233285	4.53885	5.65615e-06	4.80184e-05	ENSG00000078399.19_HOXA9	ENSG00000078399	HOXA9	up	YES	NO	0.413307	0.0035028	-0.342598	0.0171418
456.163	-0.904645	0.199321	-4.53863	5.66221e-06	4.80442e-05	ENSG00000163932.15_PRKCD	ENSG00000163932	PRKCD	down	YES	YES	-0.255604	0.0795246	0.397305	0.0051713
72.0832	0.874451	0.192686	4.53822	5.67304e-06	4.81104e-05	ENSG00000185730.8_ZNF696	ENSG00000185730	ZNF696	up	YES	NO	0.116282	0.431245	-0.261019	0.0731436
29.4116	-1.30809	0.288324	-4.53689	5.7091e-06	4.83646e-05	ENSG00000136867.11_SLC31A2	ENSG00000136867	SLC31A2	down	YES	NO	-0.262618	0.0713394	0.294001	0.0425318
401.714	-1.32009	0.291062	-4.53543	5.7486e-06	4.86733e-05	ENSG00000139725.8_RHOF	ENSG00000139725	RHOF	down	YES	NO	-0.260007	0.0743043	0.305699	0.0346015
71.428	0.612138	0.135009	4.53406	5.78616e-06	4.89652e-05	ENSG00000160917.15_CPSF4	ENSG00000160917	CPSF4	up	YES	NO	0.194481	0.185312	-0.343083	0.0169751
210.57	-1.11237	0.245391	-4.53307	5.81333e-06	4.91429e-05	ENSG00000162482.5_AKR7A3	ENSG00000162482	AKR7A3	down	YES	NO	-0.370822	0.00946909	0.510244	0.000211469
2223.9	0.697611	0.153904	4.53276	5.82168e-06	4.91873e-05	ENSG00000067225.19_PKM	ENSG00000067225	PKM	up	YES	YES	0.342247	0.0172631	-0.299731	0.0384799
102.097	1.35844	0.299717	4.53241	5.83134e-06	4.92427e-05	ENSG00000142185.17_TRPM2	ENSG00000142185	TRPM2	up	YES	NO	0.258399	0.0761783	-0.306202	0.0342902
66.9168	-0.690952	0.152487	-4.53122	5.86447e-06	4.94962e-05	ENSG00000164010.15_ERMAP	ENSG00000164010	ERMAP	down	YES	NO	-0.413234	0.00350925	0.342404	0.0172088
244.84	-0.80033	0.176663	-4.53025	5.89129e-06	4.96963e-05	ENSG00000168216.13_LMBRD1	ENSG00000168216	LMBRD1	down	YES	NO	-0.367868	0.0101001	0.456594	0.00110625
361.728	1.00593	0.222056	4.53007	5.89648e-06	4.97136e-05	ENSG00000163597.15_SNHG16	ENSG00000163597	SNHG16	up	YES	NO	0.260012	0.0742985	-0.329506	0.0221963
357.179	0.675246	0.149105	4.52866	5.93589e-06	5.00194e-05	ENSG00000092201.10_SUPT16H	ENSG00000092201	SUPT16H	up	YES	YES	0.180258	0.220191	-0.332848	0.0208001
105.098	1.18964	0.262711	4.52831	5.94578e-06	5.00762e-05	ENSG00000175866.16_BAIAP2	ENSG00000175866	BAIAP2	up	YES	NO	0.292004	0.0440237	-0.354648	0.0133879
300.594	-0.535071	0.118185	-4.52741	5.97101e-06	5.0262e-05	ENSG00000166272.18_WBP1L	ENSG00000166272	WBP1L	down	YES	NO	-0.387492	0.0065072	0.351953	0.01416
24.1222	1.26031	0.278396	4.52704	5.98157e-06	5.03243e-05	ENSG00000279281.1_RP11-226M10.3	ENSG00000279281	RP11-226M10	up	YES	NO	0.201646	0.169323	-0.432408	0.00214554
79.0568	0.786969	0.17387	4.52619	6.00553e-06	5.04991e-05	ENSG00000162139.10_NEU3	ENSG00000162139	NEU3	up	YES	NO	0.301853	0.0370616	-0.215222	0.141812
190.646	0.725307	0.160276	4.52536	6.02935e-06	5.06192e-05	ENSG00000137337.15_MDC1	ENSG00000137337	MDC1	up	YES	YES	0.234066	0.109323	-0.233041	0.110929
98.5014	1.60155	0.353893	4.52553	6.02448e-06	5.06192e-05	ENSG00000138316.11_ADAMTS14	ENSG00000138316	ADAMTS14	up	YES	NO	0.23207	0.112468	-0.253107	0.0826091
72.2912	-0.543793	0.120163	-4.52546	6.02646e-06	5.06192e-05	ENSG00000176209.12_SMIM19	ENSG00000176209	SMIM19	down	YES	NO	-0.507896	0.000228676	0.292713	0.0434893
88.3257	-0.611783	0.135205	-4.52486	6.04347e-06	5.07109e-05	ENSG00000065491.8_TBC1D22B	ENSG00000065491	TBC1D22B	down	YES	NO	-0.150021	0.308796	0.417885	0.00312249
91.2001	0.586239	0.129582	4.52408	6.0658e-06	5.08714e-05	ENSG00000083535.16_PIBF1	ENSG00000083535	PIBF1	up	YES	NO	0.225483	0.123333	-0.358415	0.0123689
103.835	1.06617	0.235705	4.52333	6.08732e-06	5.1025e-05	ENSG00000073536.18_NLE1	ENSG00000073536	NLE1	up	YES	NO	0.262456	0.0715209	-0.390662	0.00604608
48.8829	1.15813	0.256269	4.51918	6.20782e-06	5.19963e-05	ENSG00000071282.12_LMCD1	ENSG00000071282	LMCD1	up	YES	NO	0.225041	0.124089	-0.346852	0.0157257
244.292	-0.581129	0.128593	-4.51912	6.20973e-06	5.19963e-05	ENSG00000088682.14_COQ9	ENSG00000088682	COQ9	down	YES	NO	-0.366119	0.0104907	0.477021	0.000608106
272.451	0.625996	0.138536	4.51866	6.22309e-06	5.20808e-05	ENSG00000198728.11_LDB1	ENSG00000198728	LDB1	up	YES	NO	0.459265	0.00102512	-0.399611	0.00489465
185.508	0.525665	0.116353	4.51786	6.24672e-06	5.2251e-05	ENSG00000163161.14_ERCC3	ENSG00000163161	ERCC3	up	YES	NO	0.271417	0.062033	-0.419488	0.00299826
9.4914	-1.58353	0.350547	-4.5173	6.26337e-06	5.23627e-05	ENSG00000232913.8_PLCE1-AS2	ENSG00000232913	PLCE1-AS2	down	YES	NO	-0.410171	0.00378633	0.563833	3.00448e-05
33.4957	0.919573	0.203645	4.51556	6.31508e-06	5.27673e-05	ENSG00000196083.10_IL1RAP	ENSG00000196083	IL1RAP	up	YES	NO	0.248543	0.0884916	-0.182945	0.213277
13.8473	-2.0217	0.447967	-4.51306	6.38978e-06	5.33634e-05	ENSG00000165496.5_RPL10L	ENSG00000165496	RPL10L	down	YES	NO	-0.353267	0.0137787	0.438714	0.00181358
164.413	0.748351	0.165824	4.51292	6.3942e-06	5.33723e-05	ENSG00000101181.18_MTG2	ENSG00000101181	MTG2	up	YES	NO	0.128784	0.38301	-0.302821	0.0364294
41.1314	1.12878	0.250206	4.5114	6.44004e-06	5.37267e-05	ENSG00000130475.14_FCHO1	ENSG00000130475	FCHO1	up	YES	NO	0.400855	0.00475079	-0.27979	0.0541032
243.071	0.565371	0.12534	4.5107	6.46147e-06	5.38772e-05	ENSG00000198792.13_TMEM184B	ENSG00000198792	TMEM184B	up	YES	NO	0.162835	0.268805	-0.395542	0.00539193
1632.98	0.81432	0.180577	4.50955	6.49647e-06	5.41123e-05	ENSG00000103335.22_PIEZO1	ENSG00000103335	PIEZO1	up	YES	NO	0.224181	0.125571	-0.373084	0.00900908
1635.65	-0.656604	0.1456	-4.50964	6.49366e-06	5.41123e-05	ENSG00000153113.24_CAST	ENSG00000153113	CAST	down	YES	NO	-0.327244	0.0231857	0.505214	0.000249883
1098.72	-0.926915	0.205597	-4.5084	6.53194e-06	5.43793e-05	ENSG00000057294.16_PKP2	ENSG00000057294	PKP2	down	YES	NO	-0.322712	0.0252792	0.417502	0.00315288
114.205	1.14282	0.25355	4.50729	6.56596e-06	5.46339e-05	ENSG00000151835.17_SACS	ENSG00000151835	SACS	up	YES	NO	0.228537	0.118201	-0.261152	0.0729926
16.0557	1.24536	0.276318	4.50699	6.57534e-06	5.46833e-05	ENSG00000119630.14_PGF	ENSG00000119630	PGF	up	YES	NO	0.235596	0.106958	-0.37501	0.00863266
493.217	-0.765786	0.169928	-4.50652	6.58998e-06	5.4771e-05	ENSG00000115159.16_GPD2	ENSG00000115159	GPD2	down	YES	NO	-0.465112	0.000865827	0.384363	0.00699203
352.276	-0.747755	0.165931	-4.50643	6.59278e-06	5.4771e-05	ENSG00000157823.17_AP3S2	ENSG00000157823	AP3S2	down	YES	NO	-0.44311	0.00161	0.456727	0.00110207
100.723	1.23643	0.274437	4.50532	6.62723e-06	5.50285e-05	ENSG00000176720.6_BOK	ENSG00000176720	BOK	up	YES	NO	0.122958	0.405077	-0.327424	0.0231055
25.7542	1.22598	0.272188	4.50416	6.66351e-06	5.53008e-05	ENSG00000089723.10_OTUB2	ENSG00000089723	OTUB2	up	YES	NO	0.138315	0.348484	-0.232116	0.112394
21.5995	-0.884091	0.196301	-4.50375	6.67659e-06	5.53805e-05	ENSG00000258168.6_RP11-588H23.3	ENSG00000258168	RP11-588H23	down	YES	NO	-0.0486325	0.742724	0.58615	1.20118e-05
308.743	0.617768	0.137182	4.50326	6.69189e-06	5.54734e-05	ENSG00000130706.13_ADRM1	ENSG00000130706	ADRM1	up	YES	NO	0.159919	0.277589	-0.305825	0.0345235
139.062	-0.794699	0.176476	-4.50317	6.69477e-06	5.54734e-05	ENSG00000135441.7_BLOC1S1	ENSG00000135441	BLOC1S1	down	YES	NO	-0.453089	0.00122137	0.391441	0.00593727
33.2368	1.39385	0.309598	4.50211	6.72828e-06	5.57221e-05	ENSG00000084731.15_KIF3C	ENSG00000084731	KIF3C	up	YES	NO	0.167159	0.256125	-0.306941	0.0338368
49.0644	-1.41786	0.315023	-4.50081	6.76948e-06	5.60341e-05	ENSG00000115841.21_RMDN2	ENSG00000115841	RMDN2	down	YES	NO	-0.398921	0.00497598	0.518858	0.000157921
271.637	-1.77103	0.393512	-4.50057	6.77716e-06	5.60685e-05	ENSG00000168903.9_BTNL3	ENSG00000168903	BTNL3	down	YES	NO	-0.332616	0.0208946	0.448551	0.00138632
26.3146	0.570599	0.12682	4.49928	6.81855e-06	5.63816e-05	ENSG00000213337.9_ANKRD39	ENSG00000213337	ANKRD39	up	YES	NO	0.225149	0.123904	-0.346642	0.0157931
622.05	-1.31444	0.292153	-4.49916	6.82225e-06	5.63828e-05	ENSG00000006555.11_TTC22	ENSG00000006555	TTC22	down	YES	NO	-0.288716	0.0465734	0.366885	0.0103181
19.3085	1.13255	0.251807	4.49769	6.86952e-06	5.6744e-05	ENSG00000279196.1_RP11-1072A3.3	ENSG00000279196	RP11-1072A3	up	YES	NO	0.235203	0.107563	-0.254173	0.0812817
120.627	0.683582	0.151991	4.49752	6.87507e-06	5.67604e-05	ENSG00000110274.16_CEP164	ENSG00000110274	CEP164	up	YES	NO	0.35187	0.0141841	-0.313958	0.0297724
856.723	-0.631733	0.140505	-4.49615	6.9196e-06	5.70984e-05	ENSG00000172493.23_AFF1	ENSG00000172493	AFF1	down	YES	NO	-0.206316	0.159454	0.439632	0.00176925
129.912	0.878769	0.195476	4.49554	6.93926e-06	5.72309e-05	ENSG00000012048.23_BRCA1	ENSG00000012048	BRCA1	up	YES	YES	0.322332	0.025462	-0.37346	0.00893449
40.0548	-0.953211	0.212112	-4.49391	6.9928e-06	5.76426e-05	ENSG00000204613.11_TRIM10	ENSG00000204613	TRIM10	down	YES	NO	-0.252804	0.0829898	0.409065	0.00389097
515.686	1.19454	0.265831	4.4936	7.00288e-06	5.76957e-05	ENSG00000142089.17_IFITM3	ENSG00000142089	IFITM3	up	YES	NO	0.263744	0.0700904	-0.325016	0.024196
16.3358	1.15967	0.2581	4.4931	7.01936e-06	5.78015e-05	ENSG00000167771.6_RCOR2	ENSG00000167771	RCOR2	up	YES	NO	0.191697	0.191807	-0.209579	0.152813
70.6082	0.653992	0.145563	4.49286	7.02725e-06	5.78366e-05	ENSG00000185238.13_PRMT3	ENSG00000185238	PRMT3	up	YES	NO	0.190329	0.195059	-0.41131	0.00368112
82.5345	0.715743	0.159321	4.49245	7.04084e-06	5.79185e-05	ENSG00000125459.17_MSTO1	ENSG00000125459	MSTO1	up	YES	NO	0.292478	0.043666	-0.409991	0.00380322
81.4704	0.919698	0.204752	4.49177	7.06333e-06	5.80734e-05	ENSG00000110104.13_CCDC86	ENSG00000110104	CCDC86	up	YES	NO	0.164299	0.264466	-0.351573	0.0142719
59.7633	-2.00776	0.447129	-4.49033	7.11131e-06	5.84377e-05	ENSG00000162460.7_TMEM82	ENSG00000162460	TMEM82	down	YES	NO	-0.360406	0.011858	0.467003	0.000819284
53.9672	0.944326	0.210312	4.49011	7.11853e-06	5.84668e-05	ENSG00000182057.5_OGFRP1	ENSG00000182057	OGFRP1	up	YES	NO	0.147364	0.31754	-0.294112	0.0424506
128.916	1.25473	0.279649	4.48679	7.23058e-06	5.93565e-05	ENSG00000143702.16_CEP170	ENSG00000143702	CEP170	up	YES	NO	0.334262	0.0202317	-0.28806	0.0470959
388.168	0.873407	0.194691	4.48611	7.25347e-06	5.94829e-05	ENSG00000055483.19_USP36	ENSG00000055483	USP36	up	YES	YES	0.396199	0.00530876	-0.337071	0.0191418
145.337	0.670222	0.149397	4.48618	7.25126e-06	5.94829e-05	ENSG00000198171.13_DDRGK1	ENSG00000198171	DDRGK1	up	YES	NO	0.288958	0.0463811	-0.262423	0.0715573
16.738	1.61969	0.361058	4.48595	7.259e-06	5.94976e-05	ENSG00000128965.13_CHAC1	ENSG00000128965	CHAC1	up	YES	NO	0.187192	0.202657	-0.377344	0.00819484
36.5705	-1.93015	0.430282	-4.48577	7.26522e-06	5.95179e-05	ENSG00000139209.16_SLC38A4	ENSG00000139209	SLC38A4	down	YES	NO	-0.351712	0.0142307	0.414405	0.00340808
359.52	-1.40882	0.314106	-4.48518	7.28527e-06	5.96207e-05	ENSG00000006740.17_ARHGAP44	ENSG00000006740	ARHGAP44	down	YES	NO	-0.218882	0.134999	0.344839	0.0163827
1723.58	-0.861016	0.192015	-4.48411	7.32198e-06	5.98595e-05	ENSG00000183255.12_PTTG1IP	ENSG00000183255	PTTG1IP	down	YES	NO	-0.277725	0.0559784	0.319681	0.0267661
74.8655	-0.650525	0.145072	-4.48415	7.32058e-06	5.98595e-05	ENSG00000214135.8_AC024560.3	ENSG00000214135	AC024560	down	YES	NO	-0.255553	0.0795863	0.491504	0.000388799
377.147	-1.08705	0.242456	-4.4835	7.34273e-06	5.99675e-05	ENSG00000079739.17_PGM1	ENSG00000079739	PGM1	down	YES	NO	-0.327629	0.0230146	0.427361	0.00244894
187.693	0.727777	0.162321	4.48358	7.34008e-06	5.99675e-05	ENSG00000187535.14_IFT140	ENSG00000187535	IFT140	up	YES	NO	0.308618	0.0328259	-0.387546	0.00649907
15.7876	1.68015	0.374769	4.48314	7.35509e-06	6.00376e-05	ENSG00000188322.8_SBK1	ENSG00000188322	SBK1	up	YES	NO	0.113126	0.443936	-0.29992	0.0383514
59.5701	1.23261	0.275004	4.48215	7.38957e-06	6.02881e-05	ENSG00000134278.15_SPIRE1	ENSG00000134278	SPIRE1	up	YES	NO	0.259777	0.0745708	-0.388312	0.00638514
60.5189	0.699849	0.156159	4.48164	7.40704e-06	6.03996e-05	ENSG00000012211.13_PRICKLE3	ENSG00000012211	PRICKLE3	up	YES	NO	0.355879	0.0130472	-0.443107	0.00161011
20.5731	1.43058	0.319233	4.4813	7.41911e-06	6.04671e-05	ENSG00000143479.18_DYRK3	ENSG00000143479	DYRK3	up	YES	NO	0.336313	0.0194309	-0.352787	0.0139169
43.6705	0.671307	0.149814	4.48095	7.43106e-06	6.05334e-05	ENSG00000155592.16_ZKSCAN2	ENSG00000155592	ZKSCAN2	up	YES	NO	0.313671	0.0299305	-0.305657	0.034628
27.9975	-2.39916	0.53551	-4.48013	7.45961e-06	6.07349e-05	ENSG00000197614.11_MFAP5	ENSG00000197614	MFAP5	down	YES	NO	-0.383851	0.00707426	0.394246	0.00555934
571.416	-0.568055	0.126826	-4.47901	7.49889e-06	6.10235e-05	ENSG00000119396.11_RAB14	ENSG00000119396	RAB14	down	YES	NO	-0.348345	0.0152527	0.506506	0.000239453
598.344	-0.945714	0.211169	-4.47847	7.51812e-06	6.11487e-05	ENSG00000176595.4_KBTBD11	ENSG00000176595	KBTBD11	down	YES	NO	-0.382717	0.0072593	0.376409	0.00836785
42.7007	0.733359	0.163757	4.47835	7.52224e-06	6.11509e-05	ENSG00000186230.7_ZNF749	ENSG00000186230	ZNF749	up	YES	NO	0.298626	0.0392356	-0.326818	0.023376
187.641	0.588108	0.131357	4.47718	7.56337e-06	6.14539e-05	ENSG00000129187.15_DCTD	ENSG00000129187	DCTD	up	YES	NO	0.222038	0.129323	-0.271109	0.0623411
63.5469	0.614714	0.137307	4.47692	7.57269e-06	6.14981e-05	ENSG00000196204.12_RNF216P1	ENSG00000196204	RNF216P1	up	YES	NO	0.270471	0.0629835	-0.310498	0.0317225
443.777	-0.788489	0.176141	-4.47648	7.58854e-06	6.15954e-05	ENSG00000119431.10_HDHD3	ENSG00000119431	HDHD3	down	YES	NO	-0.361329	0.0116272	0.393952	0.00559795
258.051	-0.639227	0.142804	-4.47625	7.59664e-06	6.16296e-05	ENSG00000169410.10_PTPN9	ENSG00000169410	PTPN9	down	YES	NO	-0.318705	0.0272602	0.363768	0.011036
669.695	-0.592728	0.132442	-4.47539	7.62714e-06	6.18141e-05	ENSG00000138758.12_SEPTIN11	ENSG00000138758	SEPTIN11	down	YES	NO	-0.232857	0.111219	0.478948	0.000573619
58.4887	0.948395	0.21191	4.47546	7.62486e-06	6.18141e-05	ENSG00000187961.14_KLHL17	ENSG00000187961	KLHL17	up	YES	NO	0.350666	0.0145418	-0.404233	0.00437875
99.1435	0.635131	0.141926	4.47508	7.63813e-06	6.18716e-05	ENSG00000167925.16_GHDC	ENSG00000167925	GHDC	up	YES	NO	0.152759	0.299948	-0.418874	0.00304532
134.327	1.0385	0.232125	4.47387	7.68158e-06	6.21919e-05	ENSG00000090924.15_PLEKHG2	ENSG00000090924	PLEKHG2	up	YES	NO	0.369451	0.00975753	-0.303419	0.0360429
79.2408	0.730547	0.163351	4.47226	7.73981e-06	6.26314e-05	ENSG00000141013.17_GAS8	ENSG00000141013	GAS8	up	YES	NO	0.455127	0.00115321	-0.370796	0.00947445
2031.31	-0.681239	0.152341	-4.4718	7.75633e-06	6.27331e-05	ENSG00000088888.18_MAVS	ENSG00000088888	MAVS	down	YES	NO	-0.274416	0.059092	0.442019	0.00165853
567.13	-1.72975	0.386866	-4.47118	7.77896e-06	6.28842e-05	ENSG00000167701.14_GPT	ENSG00000167701	GPT	down	YES	NO	-0.326828	0.0233718	0.399873	0.00486397
59.4392	2.14302	0.479373	4.47047	7.80491e-06	6.30134e-05	ENSG00000075213.11_SEMA3A	ENSG00000075213	SEMA3A	up	YES	NO	0.0127867	0.931262	-0.190241	0.195269
526.07	0.701331	0.156883	4.47041	7.80683e-06	6.30134e-05	ENSG00000197930.13_ERO1A	ENSG00000197930	ERO1A	up	YES	NO	0.149431	0.310724	-0.383882	0.00706927
77.6447	2.81329	0.629465	4.46933	7.84664e-06	6.33026e-05	ENSG00000184292.7_TACSTD2	ENSG00000184292	TACSTD2	up	YES	NO	0.210309	0.151357	-0.25094	0.0853624
268.229	0.584064	0.130696	4.46887	7.86332e-06	6.33729e-05	ENSG00000109736.15_MFSD10	ENSG00000109736	MFSD10	up	YES	NO	0.254893	0.0803936	-0.527511	0.000116847
251.963	1.39443	0.312031	4.46889	7.86271e-06	6.33729e-05	ENSG00000112769.20_LAMA4	ENSG00000112769	LAMA4	up	YES	NO	0.122426	0.407129	-0.334215	0.0202503
43.78	1.4211	0.318024	4.46853	7.87604e-06	6.34432e-05	ENSG00000165891.16_E2F7	ENSG00000165891	E2F7	up	YES	NO	0.302858	0.0364052	-0.320714	0.0262514
41.0068	0.803632	0.179867	4.46793	7.89786e-06	6.35868e-05	ENSG00000187607.16_ZNF286A	ENSG00000187607	ZNF286A	up	YES	NO	0.381576	0.0074499	-0.382633	0.00727326
1108.44	-1.25104	0.280103	-4.46634	7.95679e-06	6.40288e-05	ENSG00000109062.12_SLC9A3R1	ENSG00000109062	SLC9A3R1	down	YES	NO	-0.288283	0.0469172	0.359635	0.0120535
2572.62	1.07925	0.241694	4.46537	7.99299e-06	6.42876e-05	ENSG00000169710.9_FASN	ENSG00000169710	FASN	up	YES	NO	0.35334	0.0137578	-0.308293	0.0330199
168.671	0.813367	0.182156	4.46521	7.99899e-06	6.43033e-05	ENSG00000179409.11_GEMIN4	ENSG00000179409	GEMIN4	up	YES	NO	0.200693	0.171389	-0.318157	0.0275406
637.032	-0.831875	0.18632	-4.46478	8.01526e-06	6.44015e-05	ENSG00000136379.12_ABHD17C	ENSG00000136379	ABHD17C	down	YES	NO	-0.284532	0.0499889	0.355279	0.0132124
1745.3	-0.872943	0.195542	-4.46423	8.03578e-06	6.45338e-05	ENSG00000105738.11_SIPA1L3	ENSG00000105738	SIPA1L3	down	YES	NO	-0.24644	0.091309	0.281697	0.0524174
135.242	0.661022	0.148106	4.46315	8.07617e-06	6.48254e-05	ENSG00000108506.13_INTS2	ENSG00000108506	INTS2	up	YES	NO	0.248502	0.0885459	-0.306446	0.0341399
73.291	0.611172	0.136955	4.46257	8.0983e-06	6.49703e-05	ENSG00000172336.5_POP7	ENSG00000172336	POP7	up	YES	NO	0.120848	0.413245	-0.220583	0.131916
681.941	-0.786265	0.176196	-4.46244	8.1031e-06	6.4976e-05	ENSG00000116991.11_SIPA1L2	ENSG00000116991	SIPA1L2	down	YES	NO	-0.369676	0.00970966	0.348618	0.0151678
551.586	-0.512648	0.114886	-4.46222	8.11147e-06	6.50103e-05	ENSG00000186951.16_PPARA	ENSG00000186951	PPARA	down	YES	NO	-0.304255	0.0355089	0.423378	0.00271456
665.734	-0.52211	0.117043	-4.46084	8.16395e-06	6.53979e-05	ENSG00000163812.15_ZDHHC3	ENSG00000163812	ZDHHC3	down	YES	NO	-0.355165	0.0132439	0.263189	0.0707037
81.3921	-1.59448	0.357466	-4.4605	8.17674e-06	6.54675e-05	ENSG00000184113.10_CLDN5	ENSG00000184113	CLDN5	down	YES	NO	-0.282915	0.0513631	0.30944	0.0323394
56.5767	1.06485	0.238763	4.45986	8.20118e-06	6.56301e-05	ENSG00000149150.9_SLC43A1	ENSG00000149150	SLC43A1	up	YES	NO	0.183556	0.211726	-0.118631	0.421931
173.475	1.53497	0.344246	4.45892	8.23729e-06	6.58836e-05	ENSG00000186529.16_CYP4F3	ENSG00000186529	CYP4F3	up	YES	NO	0.0446238	0.76329	-0.235502	0.107103
21.175	-1.80111	0.4041	-4.45709	8.30784e-06	6.63501e-05	ENSG00000256643.1_LINC02441	ENSG00000256643	LINC02441	down	YES	NO	-0.38951	0.0062103	0.414396	0.00340884
97.8359	0.681265	0.152857	4.45687	8.31641e-06	6.63518e-05	ENSG00000087263.17_OGFOD1	ENSG00000087263	OGFOD1	up	YES	NO	0.212293	0.147446	-0.337549	0.0189616
245.795	0.839817	0.188432	4.45688	8.31628e-06	6.63518e-05	ENSG00000181588.17_MEX3D	ENSG00000181588	MEX3D	up	YES	NO	0.284998	0.0495991	-0.487656	0.000438701
83.1626	0.689633	0.154778	4.45562	8.36493e-06	6.67055e-05	ENSG00000198546.15_ZNF511	ENSG00000198546	ZNF511	up	YES	NO	0.296066	0.0410329	-0.295053	0.0417632
61.7385	-1.22721	0.275548	-4.45371	8.44008e-06	6.72711e-05	ENSG00000142920.17_AZIN2	ENSG00000142920	AZIN2	down	YES	NO	-0.203962	0.164374	0.319552	0.0268308
285.974	-1.80688	0.405767	-4.45301	8.46739e-06	6.74549e-05	ENSG00000077942.19_FBLN1	ENSG00000077942	FBLN1	down	YES	NO	-0.33005	0.0219638	0.367437	0.0101952
15.9478	-1.09275	0.245456	-4.45191	8.51103e-06	6.77347e-05	ENSG00000213891.3_RPL3P6	ENSG00000213891	RPL3P6	down	YES	NO	-0.126902	0.390059	0.377176	0.00822564
17.6053	1.68506	0.378503	4.45192	8.51056e-06	6.77347e-05	ENSG00000223650.1_UHRF2P1	ENSG00000223650	UHRF2P1	up	YES	NO	0.116902	0.428776	-0.167534	0.255046
106.277	1.26697	0.284598	4.45179	8.51579e-06	6.77387e-05	ENSG00000101003.10_GINS1	ENSG00000101003	GINS1	up	YES	NO	0.219927	0.1331	-0.288638	0.0466351
1311.24	-2.418	0.543259	-4.45091	8.55073e-06	6.79825e-05	ENSG00000167434.10_CA4	ENSG00000167434	CA4	down	YES	NO	-0.331696	0.0212726	0.454009	0.00119017
18.918	1.1499	0.258372	4.45058	8.56383e-06	6.80527e-05	ENSG00000236255.2_AC009404.2	ENSG00000236255	AC009404	up	YES	NO	0.282251	0.0519355	-0.279804	0.0540915
494.703	-0.866598	0.194743	-4.44995	8.58905e-06	6.8219e-05	ENSG00000106351.13_AGFG2	ENSG00000106351	AGFG2	down	YES	NO	-0.226897	0.120937	0.400315	0.00481277
280.083	0.624659	0.140411	4.44881	8.6349e-06	6.8549e-05	ENSG00000179115.11_FARSA	ENSG00000179115	FARSA	up	YES	NO	0.225163	0.12388	-0.406404	0.00415339
357.472	-0.663653	0.149184	-4.44855	8.64521e-06	6.85623e-05	ENSG00000100220.12_RTCB	ENSG00000100220	RTCB	down	YES	NO	-0.386705	0.00662635	0.352857	0.0138967
74.2327	-1.64426	0.369614	-4.44858	8.64399e-06	6.85623e-05	ENSG00000137757.11_CASP5	ENSG00000137757	CASP5	down	YES	NO	-0.176611	0.229826	0.458642	0.00104356
48.3657	1.06379	0.239139	4.44841	8.65086e-06	6.85729e-05	ENSG00000224888.4_RP5-1142A6.2	ENSG00000224888	RP5-1142A6	up	YES	NO	0.213833	0.144464	-0.328131	0.0227937
136.772	-0.677467	0.152331	-4.44733	8.69442e-06	6.88839e-05	ENSG00000132522.16_GPS2	ENSG00000132522	GPS2	down	YES	NO	-0.222232	0.12898	0.233551	0.110128
165.077	0.512397	0.115238	4.44643	8.73097e-06	6.9139e-05	ENSG00000085998.14_POMGNT1	ENSG00000085998	POMGNT1	up	YES	NO	0.241513	0.0981832	-0.271146	0.0623041
50.9243	0.726424	0.163403	4.4456	8.76459e-06	6.93707e-05	ENSG00000156928.5_MALSU1	ENSG00000156928	MALSU1	up	YES	NO	0.174381	0.235855	-0.252772	0.0830302
48.9019	0.657202	0.147845	4.44522	8.78021e-06	6.94598e-05	ENSG00000248008.3_NRAV	ENSG00000248008	NRAV	up	YES	NO	0.195712	0.182491	-0.237939	0.103415
10564.9	-1.85651	0.41777	-4.44385	8.83632e-06	6.98689e-05	ENSG00000205277.10_MUC12	ENSG00000205277	MUC12	down	YES	NO	-0.132001	0.371138	0.310798	0.0315493
98.6174	0.870251	0.195841	4.44367	8.8438e-06	6.98933e-05	ENSG00000068097.15_HEATR6	ENSG00000068097	HEATR6	up	YES	NO	0.158066	0.283266	-0.316134	0.0285981
425.115	-0.738221	0.166167	-4.44265	8.88558e-06	7.01334e-05	ENSG00000115993.13_TRAK2	ENSG00000115993	TRAK2	down	YES	NO	-0.347142	0.015633	0.450689	0.00130628
222.932	-0.690155	0.155342	-4.44281	8.87927e-06	7.01334e-05	ENSG00000182154.8_MRPL41	ENSG00000182154	MRPL41	down	YES	NO	-0.330627	0.0217194	0.288088	0.0470734
535.132	0.939999	0.211587	4.44261	8.88741e-06	7.01334e-05	ENSG00000205336.14_ADGRG1	ENSG00000205336	ADGRG1	up	YES	NO	0.222021	0.129353	-0.264488	0.069274
234.336	-0.931777	0.209782	-4.44164	8.92748e-06	7.04146e-05	ENSG00000122644.13_ARL4A	ENSG00000122644	ARL4A	down	YES	NO	-0.355499	0.0131517	0.403286	0.00448034
24.6273	-1.28845	0.290272	-4.43878	9.04689e-06	7.13211e-05	ENSG00000169918.10_OTUD7A	ENSG00000169918	OTUD7A	down	YES	NO	-0.349178	0.0149945	0.32171	0.0257631
498.116	-0.746037	0.168096	-4.43817	9.07285e-06	7.14902e-05	ENSG00000006831.10_ADIPOR2	ENSG00000006831	ADIPOR2	down	YES	NO	-0.33276	0.0208356	0.38493	0.0069018
759.683	-0.906391	0.204252	-4.4376	9.09676e-06	7.16432e-05	ENSG00000168961.17_LGALS9	ENSG00000168961	LGALS9	down	YES	NO	-0.373853	0.00885702	0.318982	0.0271193
149.924	0.798871	0.18008	4.43621	9.15566e-06	7.20714e-05	ENSG00000117411.18_B4GALT2	ENSG00000117411	B4GALT2	up	YES	NO	0.167046	0.256451	-0.270198	0.0632607
2065.31	-0.584002	0.13165	-4.43602	9.16393e-06	7.21008e-05	ENSG00000044115.21_CTNNA1	ENSG00000044115	CTNNA1	down	YES	NO	-0.396212	0.00530717	0.443936	0.00157407
25.5811	-1.24613	0.280945	-4.4355	9.186e-06	7.2203e-05	ENSG00000158473.8_CD1D	ENSG00000158473	CD1D	down	YES	NO	-0.180748	0.21892	0.316883	0.0282025
309.86	-0.892271	0.201239	-4.43389	9.2549e-06	7.26727e-05	ENSG00000110002.16_VWA5A	ENSG00000110002	VWA5A	down	YES	NO	-0.350417	0.0146168	0.354459	0.0134409
419.569	0.640121	0.144367	4.43397	9.25136e-06	7.26727e-05	ENSG00000270647.6_TAF15	ENSG00000270647	TAF15	up	YES	NO	0.376764	0.00830181	-0.390361	0.00608863
103.414	0.732352	0.165255	4.43165	9.35142e-06	7.33944e-05	ENSG00000115368.10_WDR75	ENSG00000115368	WDR75	up	YES	NO	0.21738	0.137765	-0.335084	0.0199076
566.627	0.588394	0.13279	4.43101	9.37907e-06	7.35751e-05	ENSG00000080345.18_RIF1	ENSG00000080345	RIF1	up	YES	NO	0.274203	0.0592973	-0.269991	0.0634713
130.945	0.75319	0.170013	4.43018	9.41546e-06	7.38241e-05	ENSG00000183684.8_ALYREF	ENSG00000183684	ALYREF	up	YES	NO	0.267011	0.0665636	-0.304135	0.0355851
455.998	-0.593037	0.133868	-4.43002	9.42227e-06	7.38411e-05	ENSG00000130414.13_NDUFA10	ENSG00000130414	NDUFA10	down	YES	NO	-0.366751	0.010348	0.435505	0.00197636
46.7527	1.29481	0.292311	4.42956	9.4426e-06	7.38548e-05	ENSG00000071539.14_TRIP13	ENSG00000071539	TRIP13	up	YES	NO	0.277884	0.0558324	-0.373344	0.00895741
264.255	0.790703	0.178493	4.42988	9.42871e-06	7.38548e-05	ENSG00000105486.14_LIG1	ENSG00000105486	LIG1	up	YES	NO	0.292671	0.0435208	-0.37959	0.00779188
[truncated: 3,519 more rows]
