# Supplementary material
Source: Research Square preprint supplement (doi:10.21203/rs.3.rs-9763213/v1)

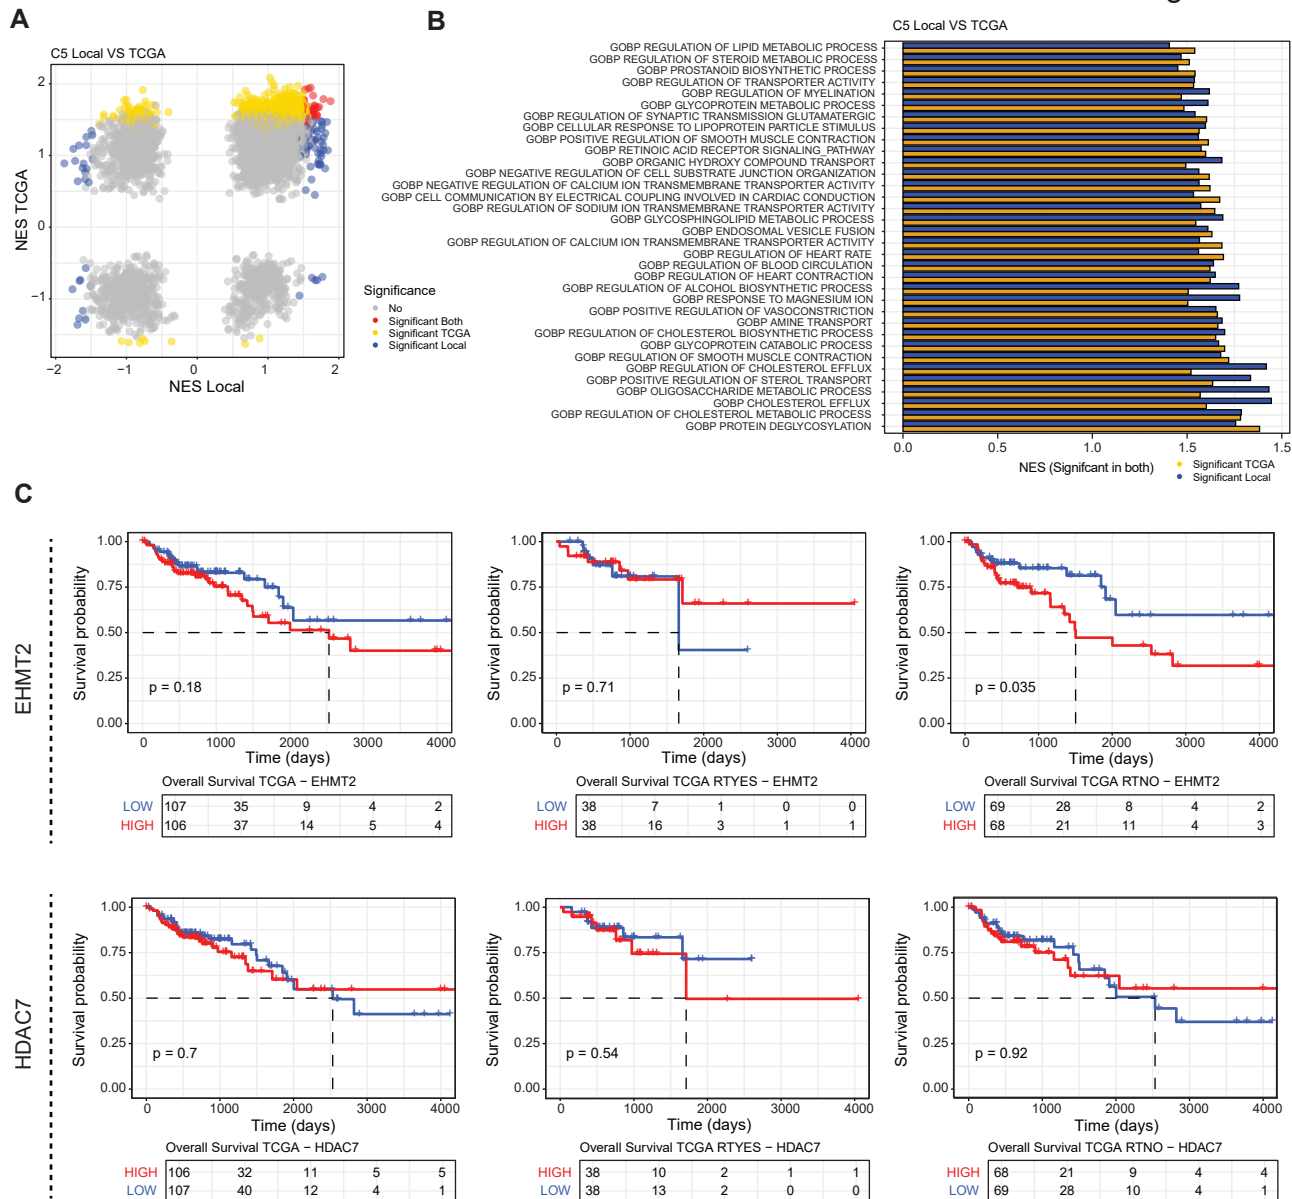

Supplement: Supplementary file 2 [file 40e376b767cfaa9ef2a061db.pdf]

A

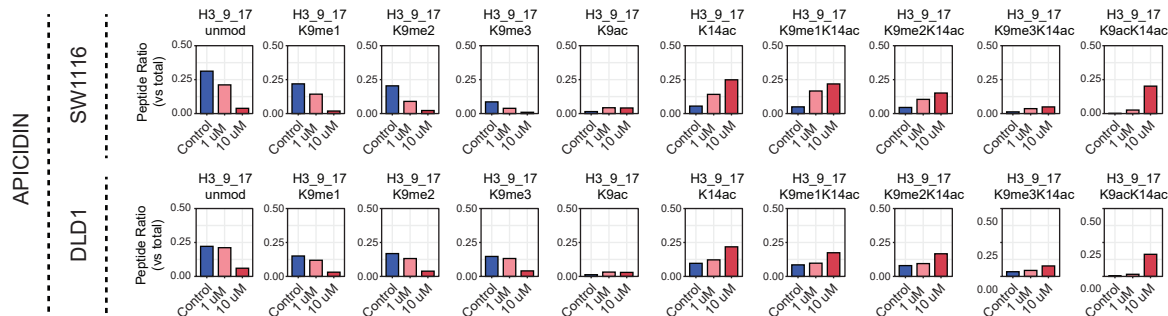

B

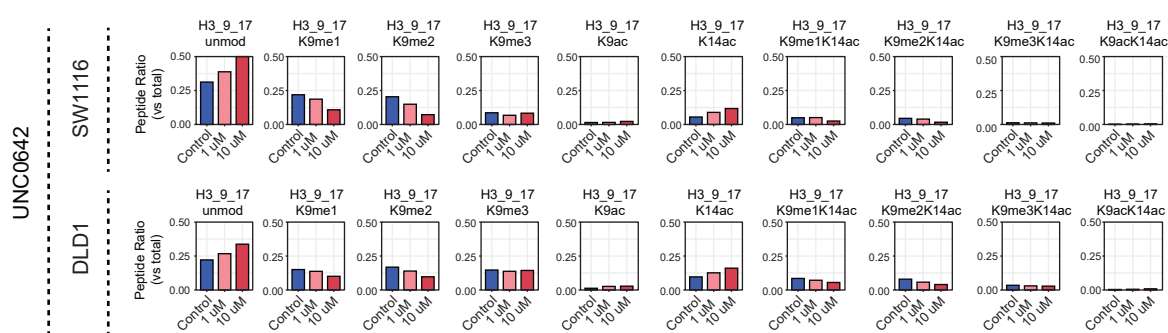

C

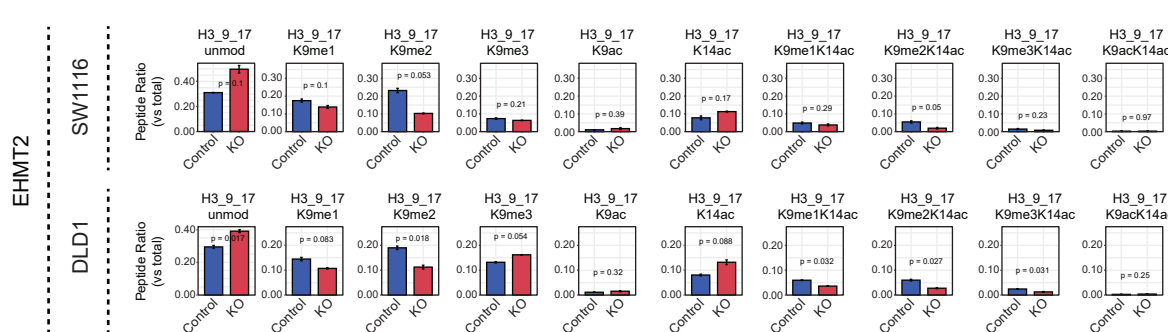

D

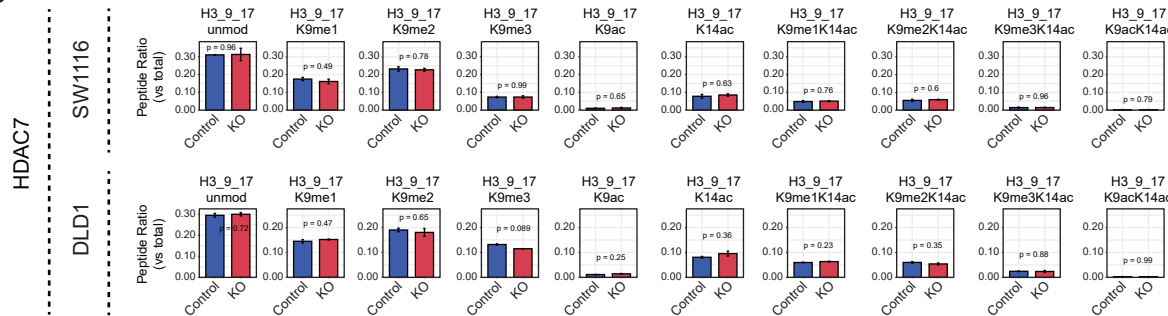

Supplement: Supplementary file 3 [file 478181996c755a4b330410eb.pdf]

A

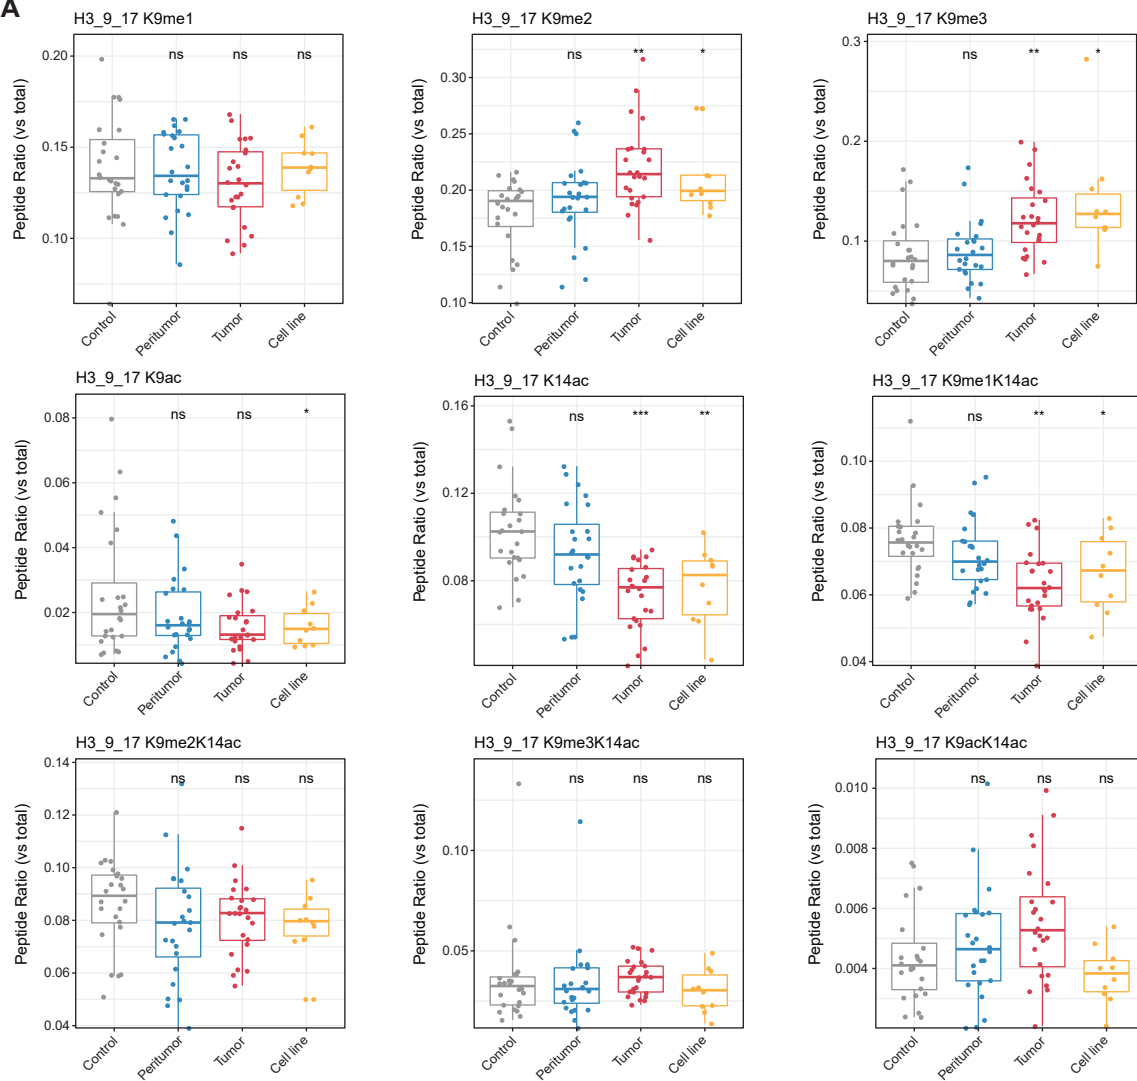

Supplement: Supplementary file 5 [file 905f79ff650cc8fa29d07dc2.pdf]

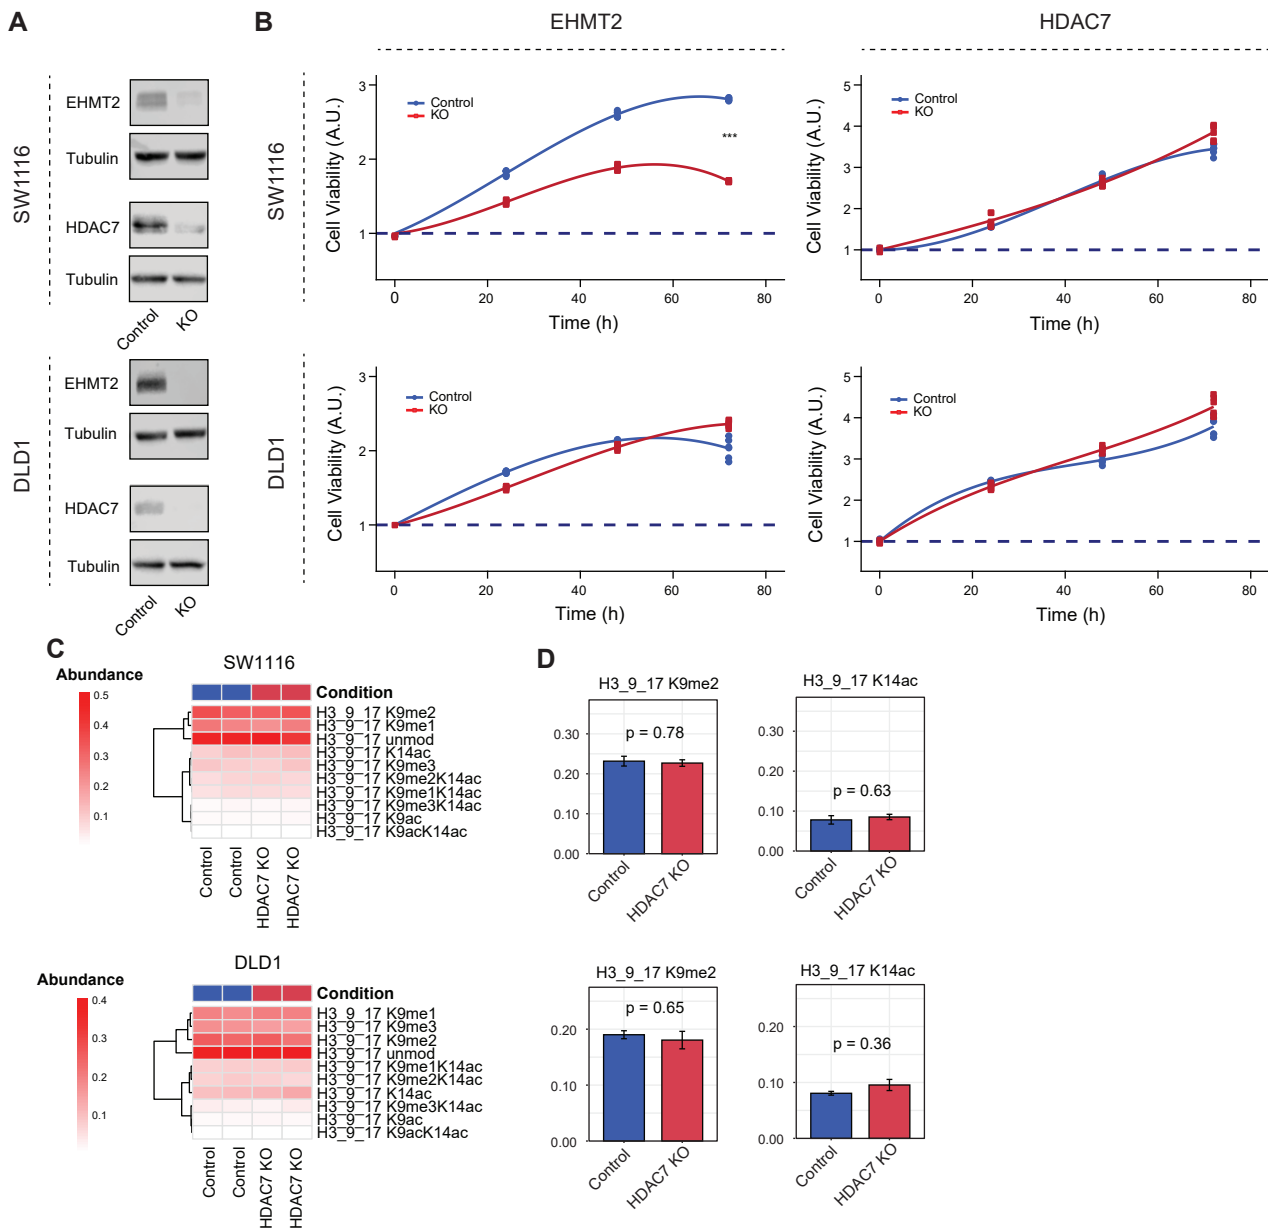

Supplement: Supplementary file 7 [file c4887a01504d10fd587a3dd4.pdf]

A

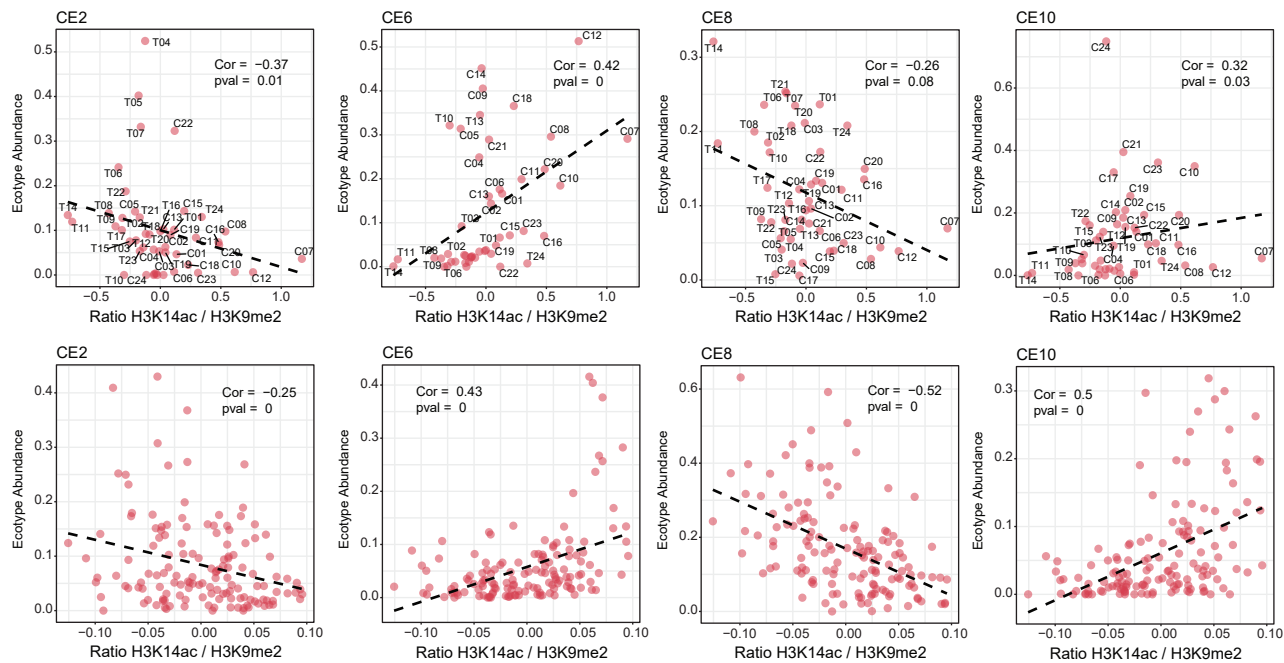

Supplement: Supplementary file 8 [file c6fb5d7d3687b6b13fb0ba10.pdf]

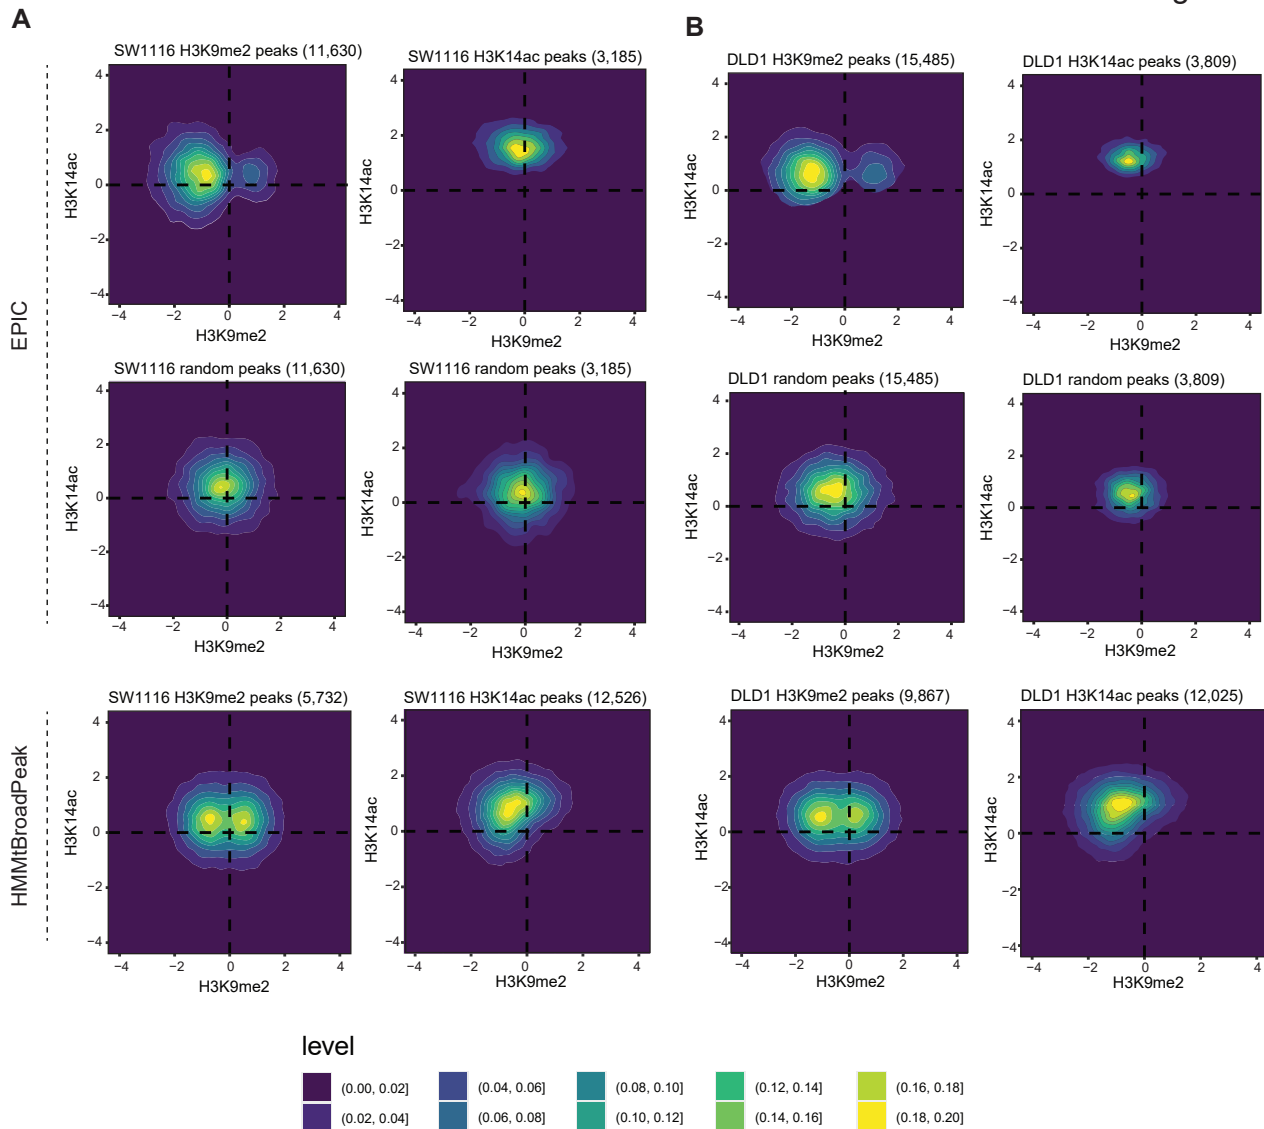

Supplement: Supplementary file 9 [file ccd38e322fec54223a201888.pdf]

A

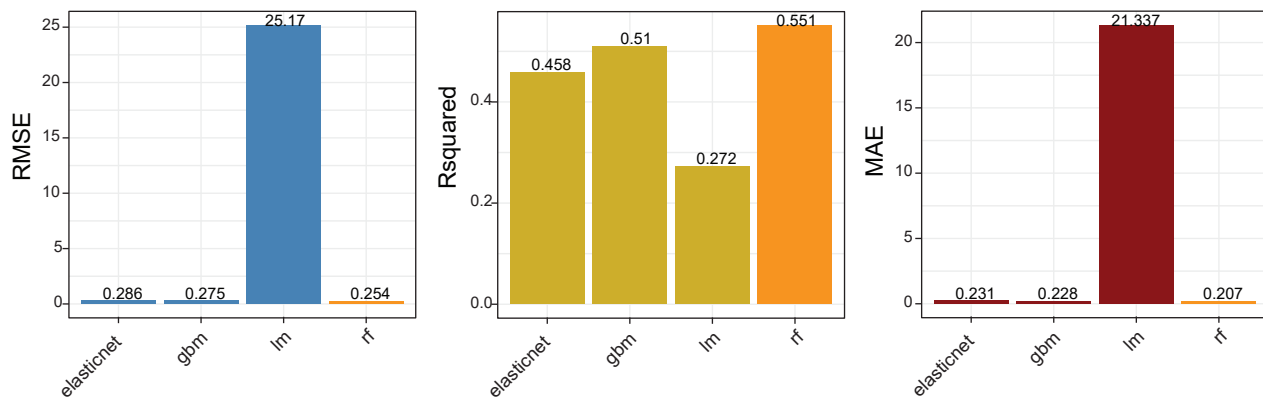

Supplement: Supplementary file 10 [file cde7842bac21961a88f39eb5.pdf]

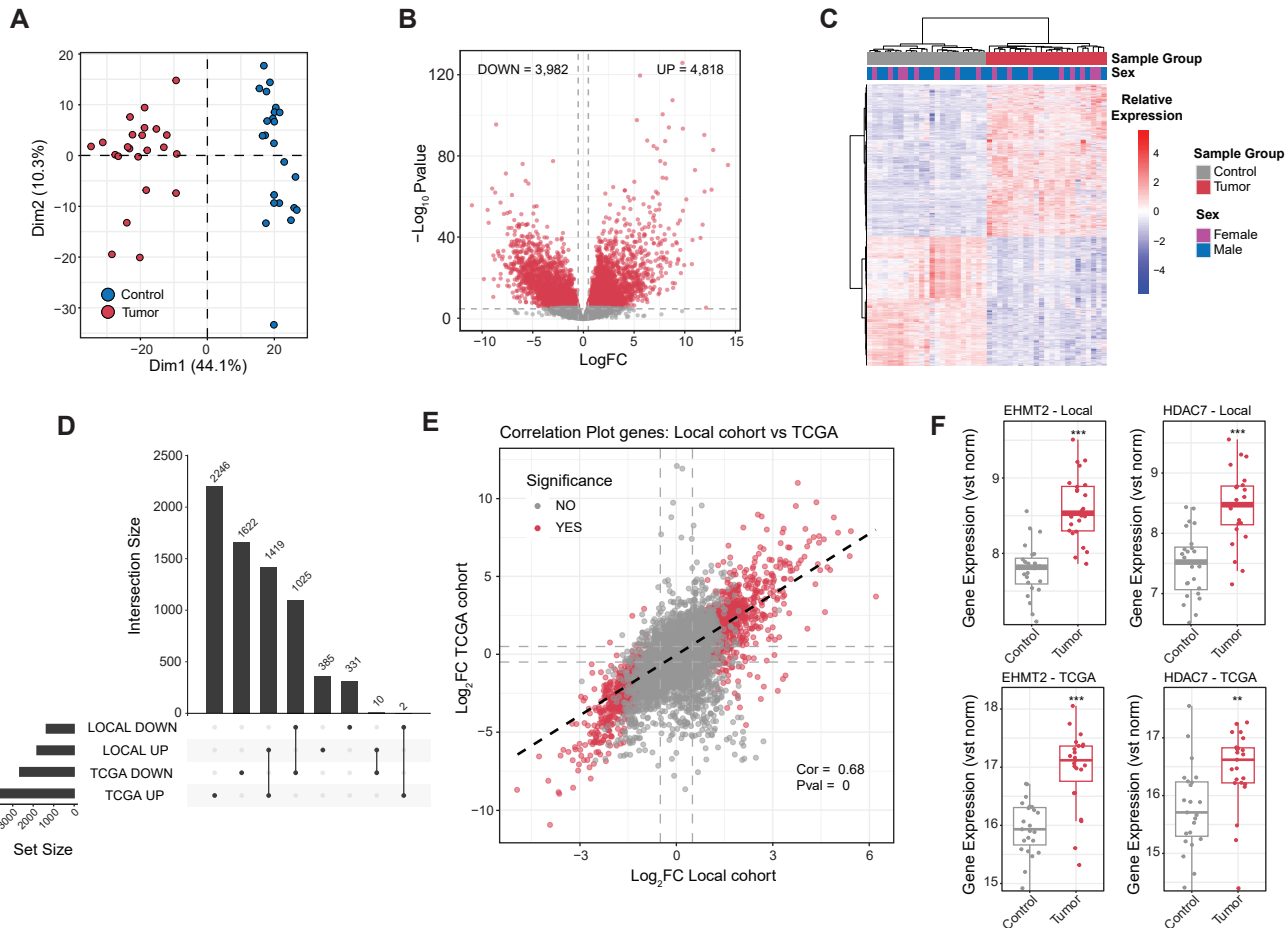

Supplement: Supplementary file 11 [file e479b945e4a9cc36bd911e02.pdf]
